# Supplementary material for: Genotypic and Phenotypic Characterization of Lettuce Bacterial Pathogen Xanthomonas hortorum pv. vitians Populations Collected in Quebec, Canada
Source: MDPI journal article supplement (doi:10.3390/agronomy11122386), 2021-11-24
Supplement: s1 [file s1]

**Supplementary Table S1: List of isolates selected for sequencing.**

| Isolate                | Year collected | Phylogroup | Pathotype | Chromosome coverage | Plasmid coverage |
|------------------------|----------------|------------|-----------|---------------------|------------------|
| B07-007                | 2007           | A          | III       | N/A                 | N/A              |
| ID030914AA             | 2014           | A          | I         | 99,86               | 99,28            |
| ID030914F              | 2014           | A          | IV        | 96,44               | 74,15            |
| ID030914P              | 2014           | E          | IV        | 96,19               | 62,69            |
| ID030915F              | 2015           | E          | V         | 96,36               | 62,69            |
| ID040816D              | 2016           | E          | V         | 96,25               | 62,69            |
| ID060814AB             | 2014           | D          | V         | 96,15               | 62,82            |
| ID060814AC             | 2014           | E          | V         | 96,29               | 62,82            |
| ID060814AE             | 2014           | C          | V         | 99,93               | 100,00           |
| ID060814AI             | 2014           | D          | V         | 96,48               | 62,82            |
| ID060814AJ             | 2014           | A          | III       | 96,22               | 53,17            |
| ID060814AK             | 2014           | C          | III       | 96,35               | 53,17            |
| ID060814AL             | 2014           | D          | V         | 96,23               | 62,82            |
| ID060814AO             | 2014           | D          | V         | 96,47               | 62,82            |
| ID060814AP             | 2014           | C          | III       | 99,91               | 100,00           |
| ID060814C              | 2014           | A          | V         | 97,26               | 74,19            |
| ID060814F              | 2014           | C          | III       | 99,91               | 100,00           |
| ID060814G              | 2014           | D          | V         | 96,34               | 62,71            |
| ID060814K <sup>1</sup> | 2014           | C          | III       | N/A                 | N/A              |
| ID060814P              | 2014           | D          | V         | 96,49               | 62,71            |
| ID060814T              | 2014           | C          | III       | 98,32               | 58,43            |
| ID060814U              | 2014           | A          | III       | 99,88               | 100,00           |
| ID070815A              | 2015           | A          | III       | 99,94               | 100,00           |
| ID070815E              | 2015           | A          | III       | 99,92               | 100,00           |
| ID070815G              | 2015           | A          | III       | 99,94               | 100,00           |
| ID100816B              | 2016           | A          | V         | 96,37               | 62,71            |
| ID100816G              | 2016           | E          | V         | 96,31               | 62,71            |
| ID100816K              | 2016           | A          | V         | 96,46               | 74,19            |
| ID100816P              | 2016           | A          | V         | 96,39               | 62,71            |
| ID100816T              | 2016           | E          | V         | 95,94               | 74,19            |
| ID100914AA             | 2014           | E          | IV        | 97,06               | 56,40            |
| ID100914AE             | 2014           | A          | V         | 96,21               | 74,19            |
| ID100914AF             | 2014           | E          | V         | 96,21               | 62,67            |
| ID100914O              | 2014           | E          | III       | 96,16               | 62,67            |
| ID110815A              | 2015           | E          | III       | 99,90               | 100,00           |
| ID110815N              | 2015           | A          | V         | 95,94               | 74,19            |
| ID110815P              | 2015           | E          | V         | 96,28               | 62,67            |
| ID110815X              | 2015           | A          | II        | 99,90               | 100,00           |
| ID110915A              | 2015           | E          | V         | 96,15               | 62,67            |

|            |      |   |     |       |        |
|------------|------|---|-----|-------|--------|
| ID110915B  | 2015 | A | III | 99,86 | 100,00 |
| ID140916E  | 2016 | E | III | 99,81 | 100,00 |
| ID140916G  | 2016 | E | III | 96,27 | 62,67  |
| ID140916I  | 2016 | A | III | 95,93 | 100,00 |
| ID140916N  | 2016 | E | III | 99,86 | 100,00 |
| ID140916S  | 2016 | A | V   | 96,26 | 62,78  |
| ID140916T  | 2016 | E | III | 96,85 | 43,99  |
| ID160615F  | 2015 | E | V   | 96,24 | 62,78  |
| ID160615J  | 2015 | E | V   | 96,19 | 62,78  |
| ID170914AC | 2014 | A | IV  | 96,50 | 74,14  |
| ID170914AE | 2014 | B | IV  | 95,81 | 64,90  |
| ID170914AF | 2014 | B | IV  | 95,89 | 64,90  |
| ID170914AG | 2014 | E | V   | 96,16 | 62,76  |
| ID170914I  | 2014 | E | V   | 96,31 | 62,76  |
| ID170914N  | 2014 | E | V   | 96,24 | 62,76  |
| ID170914X  | 2014 | E | V   | 96,18 | 62,76  |
| ID190716P  | 2016 | E | V   | 96,42 | 74,15  |
| ID190716F  | 2016 | A | V   | 96,05 | 62,76  |
| ID190716Q  | 2016 | E | IV  | 96,23 | 56,51  |
| ID190716T  | 2016 | E | IV  | 96,57 | 41,43  |
| ID190716U  | 2016 | A | III | 95,39 | 45,73  |
| ID200814A  | 2014 | D | V   | 96,30 | 62,77  |
| ID200814F  | 2014 | D | V   | 96,20 | 62,77  |
| ID200814G  | 2014 | C | III | 99,80 | 100,00 |
| ID240914AA | 2014 | A | V   | 95,52 | 72,09  |
| ID240914AD | 2014 | A | III | 95,55 | 72,09  |
| ID240914AI | 2014 | A | II  | 99,88 | 100,00 |
| ID240914AS | 2014 | A | III | 99,92 | 100,00 |
| ID240914AX | 2014 | A | III | 99,90 | 100,00 |
| ID240914B  | 2014 | A | III | 99,93 | 100,00 |
| ID240914U  | 2014 | A | III | 99,87 | 100,00 |
| ID240914Z  | 2014 | E | V   | 96,17 | 62,73  |
| ID260814A  | 2014 | E | V   | 96,32 | 62,77  |
| ID260814AA | 2014 | A | II  | 96,46 | 74,20  |
| ID260814AH | 2014 | A | II  | 96,28 | 53,26  |
| ID260814AK | 2014 | A | III | 99,91 | 100,00 |
| ID260814AL | 2014 | E | V   | 88,77 | 62,82  |
| ID260814AP | 2014 | E | IV  | 96,34 | 56,54  |
| ID260814F  | 2014 | A | V   | 96,49 | 74,21  |
| ID260814H  | 2014 | E | V   | 96,23 | 62,82  |
| ID260814K  | 2014 | E | V   | 96,27 | 62,82  |

|            |      |   |     |                     |        |
|------------|------|---|-----|---------------------|--------|
| ID260814L  | 2014 | A | III | 99,96               | 100,00 |
| ID260814Q  | 2014 | E | II  | 96,28               | 62,82  |
| ID260814X  | 2014 | E | IV  | 96,34               | 62,82  |
| ID270716AF | 2016 | A | III | 100,01 <sup>2</sup> | 100,00 |
| ID270716AK | 2016 | E | V   | 96,22               | 62,84  |
| ID270716AL | 2016 | A | III | 99,94               | 100,00 |
| ID270716G  | 2016 | A | III | 99,87               | 100,00 |
| ID270716P  | 2016 | A | III | 99,94               | 100,00 |
| ID290715A  | 2015 | A | III | 99,98               | 100,00 |
| ID290715F  | 2015 | A | III | 99,95               | 100,00 |
| ID310816B  | 2016 | A | V   | 96,49               | 74,19  |
| ID310816N  | 2016 | E | III | 96,35               | 62,84  |
| ID310816T  | 2016 | E | I   | 98,39               | 57,78  |
| ID310816U  | 2016 | A | I   | 99,92               | 100,00 |
| ID310816Z  | 2016 | A | V   | 96,04               | 74,19  |
| VT106      | 1996 | E | IV  | 94,86               | 56,57  |

<sup>1</sup> The DNA from the isolate ID060814K was not sequenced properly.

<sup>2</sup> A chromosome coverage of more than 100 % was possible due to the presence of small indels. The coverage percentage was calculated by counting the number of lines in the .vcf file generated by the alignment.

**Supplementary Table S2: Conversion of disease rating scores to parametric value for data analyses.**

| Disease rating score | Parametric values |
|----------------------|-------------------|
| 1.1                  | 1                 |
| 1.2                  | 2                 |
| 1.3                  | 3                 |
| 2.1                  | 4                 |
| 2.2                  | 5                 |
| 2.3                  | 6                 |
| 3.1                  | 7                 |
| 3.2                  | 8                 |
| 3.3                  | 9                 |
| 4.1                  | 10                |
| 4.2                  | 11                |
| 4.3                  | 12                |
| 5.1                  | 13                |
| 5.2                  | 14                |
| 5.3                  | 15                |
