# Supplementary material for: Genotypic and Phenotypic Characterization of Lettuce Bacterial Pathogen Xanthomonas hortorum pv. vitians Populations Collected in Quebec, Canada
Source: MDPI journal article supplement (doi:10.3390/agronomy11122386), 2021-11-24
Supplement: s1 [file s1]

>CONTIG\_1\_length\_120795\_cov\_17.146509

GGCCGCCAGCGCACATAACGCGAGATTCCACGCAGTAGCGCGTCTGCCAGGCGAGA  
GTGCTTTTGCCTAGCCGGGCGGTAGAGCATTCCCCTACCGTTGTGTTCCGAAATTCCT  
ACGCCGTTTCGGTCAATGCCCTGGGGCACATTGCCGGAAGCATTGCGGGCGCAGGG  
CTTTCGCGCCTGGGTGTTGGTTTCGCTTTGTCGAACCCGTTCACTAAACGGGGCGTTGA  
TAAGTTCATACAAGTACCTCTATAATTCCGCCTATCGCTTTTTGACACCTTGAATTC  
CCATCCACTTTCGCCATGCGAAGCTGATGCAGACACCTCAAATCCTCGCTCGCCCTG  
GCCGCAACGCGCCCAAGGCTCCAGTCATGTCTGGAGAGGTCACCACTATGAAGACA  
CAGAATATCTACGCCCTGTTCTCGTCCGATCCGGCCGAGTTCAACAAACAGGGCCCTC  
AAAGGCAAGCTCGGGATCACCTTGATCCAGCTCATCCGCGCCAACGGCTGGAACCA  
GGCCGCTGCCTCCGAACACCTGAAGGTCGCCCAGCCGCGCGTCAGCGATTTGATGC  
GCGGCAAACCTCGACCGTTTCTCCATCGATGCCCTCATGGAACCTCATGTTCCGCGCCG  
GCTACATGTTGACTACGAGTTCGGCTTCCCAGACGGGGAACATGCACCGCCGCGCC  
TGGAATGAACTGAAAAAGGCGATGCTCTAACATCGCCTTTTTACCCAGCGTTAC  
CGGTCTGGGCCAGTTGCTTCAGCCGTTCCGATGTCGTTCCCACCAGCTTCCGATCCT  
GCCCTTCAGTGGTCTTGCGTGTGGAATGCAACACCACCACATCACCGTTCTTCCGGA  
TGACGTACATACAGCGGTAAGCAGGGCTGCCTTTGATCTTCAGCTCGATGACGCCTT  
TGCCTGCCGCTTTCAGCTTTTCGTGCTCCAGTGCCGGCACCAAACCCACCTCCACCAT  
CTCCAAGCTCCTCAGGAACTGGTTGCGGATGGACTTGGGGAAAGCTGCCAGCTCTTT  
CTCTTGCGCCTTACCTATGATGATCTGCCGGACTTGGCCGGCTGGATTACTGCTGCTG  
TCGCTGTCTGATACATGTGTTTGATCTCGGGGTTGTCTATGTCGTGACCTTGTGAGTTTC  
ATGAGAAGCCTTCTGTAGTTGAAAAGGAGTGGTCAGGCGAGTGCCTGCCACCCG  
GCCATTTTATATAGCGGTAGTTATATGTCAACGCGGAATGCGCGTCAGTTCACAAAA  
TGGCCGCTAGTAGCTCCTGTGCGTGCGTGGGTGGCTCGCCGGCTACGCGGAGCAGG  
GGTGCCGAACATGCCGCAGTGACGCGAAGGGCATAGGCACTTGACAGGCACCCGTG  
CCCAGTCGCAAGGGTTCTATGCCTGTACGTGTACCAAAACTCCCCCTGAGGCGGTTT  
GCTTGGCTCGCGCCTGGTCACGCAGCTGTACTGGCGCCGTCTTGGCGCTGGCCTGTG  
CAGGTGCTTGGAACGCCTCTGCGCGCAGAACCTGGCCGCCGTCAAAAAGACCCGTC  
GTGCGGCGGAGCAGGGGACGACAAGGTCGGTACCTGCCTATCCCCCGGTCCGTGA  
AGCAGAGCTGATGCGTAACTCCTGGGGCCTGAACGCCGTGAGGAAGGTCAACAAGA  
CCAATTTTAGTAATTTTGCTAACGTGGCGTGCCGTCTCGGACTGTGAGACTACGAGA  
CGCGAGAGTTCGCCAAATCATGCACCTTCCACCTGCTCACACATACGCCCCGGCTGCT  
TGGGCCAGCGTGATCGATCCGGTGCCCCCTCACCTTGCCGTTGAGTGCAGTCCGGAT  
CCGGCTCGGTTTCCCTTCGCCGGCTGAAGACTTCCAAGACGACGAGCTCGATCTAAA  
CCGGGTGTTGATCCGGAATCCGCCAGCGACGTTTCTGTATCGGGCCGAGGGCTGGAG  
CATGATCCTGGCCGGCGTCTGCGACGGGGATATCCTTGTTGTGGACCGTTCGGTGAG  
TCCGATCAATGGCGACATGGTGCTCGCCATCTGGGATGGTAATCAGCCGGTCTGCAA  
GATCCTTCAAGTCGCGGTCGACCACATCGAGCTCCACAGCCGCGAGTCCACACTGCGC  
GCCGATCATCCTGGCGCCAGGCACAGAGGTCGAGGTCTTCGCGGTCGTAGGCGTGG  
TCCGCCAGGTCACGCGCGCTCATTCCCGCGCTGGCCGCTGATGTTTCGCGTTGATTGA

CGGCAACAACCTTCTACGCCAGCTGCGAGCGGGTGTTCAGCCCGAGCTGCGTGCGCA  
GGCCGTTGGTCGTGCTGAGCAACAACGATGGGTGTGCTATTGCTCGATCGGACGAA  
GCCAAAGCGTTGGGCGTCACGATGGGCCAGCCCATCCATAAGGTGCCCCCGCCAAT  
CCGCCGCCGGCTAGCGCTGCGCTCCGCAAATTTCCGGTCTCTATGGCGATATCGCTTC  
ACGCATTAACGTAATCCTGCGCCAGGCCGCGCCACGTGTGGAGGTGTACTCCATCGA  
CGAGTCTTTCCTTGACCTGGCCGGCATCCGCGATCGCCGGCAGCTGGCGATCGACTT  
ACGCGAGCGCGTCCACCAATGGACTGGCATCCCGAACTGCATCGGCATCGCGCCAA  
CGAAGACCCTGGCCAAGCTCGCCAACCGGGTCGCCAAAGAAGCAACGCGCAAGCCG  
GGCAGCTACCCAGCCGATCTGGCTGGCGTCTGCGACCTGGCCGCGCTCAGCGCTAG  
AGAGCTGGACGCTGTGCTGCGAGCAACGGCCGTTGGCGACCTCTGGGGCGTTGGCA  
GGCGCTGGGGCGCGAGGCTGCAGGCACGCGGCGTGCATACTGCAGCCGATCTGCGA  
GACGCCGCGAGCAGACGACCTGCTAGCGGAGTTCGGGGTGGTCATGGCGCGCACGCA  
CCGCGAGTTGCAGGGGCCACGCTTGTCTCGAGCTTGAGGAGGTGAGCCGGACCGGC  
AGCAGATCATGGTCAGCCGGTCGTTTCGGGACCTGGGTGAGCGATCCGCAAGATATG  
TCGGAGGCGCTGGCAACTTTTGCCATGCGCGCAACAGAGAAGCTGCGCGCACGCGG  
GCTGACTACATGCGCAATAAGCATCTTTGCCGAAACGGATTCGTTCAAACCAGGCCT  
GCCGCAGCACTACCCGTCACGCACCGGGTCACTCGCCTCCGCCACTTCTGACAGCAG  
GATCGTGCTGACGACGGTGCGCCGGCTGTTCCAAAGCTTCATGCGCGAAGGCTTCGC  
TTACAAGAAGGCCGGCGTGTGCCTTATGGATCTCGCTACACCAGGCGACCTGCAGG  
GCGACTTATTCACCCCCGCACGCGTGGGCGACGATACTTTGATGAGCACTCTTGATG  
CCATCAACCGACGCTTCGGACGTGGCACGGCGGGATTAGGCGCGAGTGGCTGGCAG  
AAATCACCCGAGTGGGCATCGCGGCAGAATCTCTTGTCTGGTCGATTCACTACATCC  
TTGGATGATCTGCCTAAAGCTGCATGCTGACACTGCTTGTGAGACAGGTGGTCGCGT  
CATCAGGAAGGGCATTTTTCGTTTCCCATCAACAGATATGAATTGTTTTGGGCTGGGT  
CCACACGAATCATCAAGCACTGTCTCTACTGCGCGTCATGAAAGGTTGACCGCAGCA  
GTGACGTTTCCAAGTCCGAGGAATGCAATCAAGCCATCGCGAAGCGCGATGGAGGT  
GTCTCCATAGCCGTCGTTGGAATGCGCGAGTACTTGCCCGTGAGCTTCTATCACCCA  
TTCGTAGCTCGCGTTGGCCATGTCGCCAATTACGGCGAGCTGATGTACTTGGTCAAA  
CGTGATGCGGTAGCACTCATCAACTGCGGCCGTGTAATCAAGCTTCAGCGCTTTAGC  
AGCCGGATTAGCCTCGTTCTGTAGCCTCACTGAAGCATTCGCTGGCGAAGCTAACGC  
GCTATCGAAGACTACATCACCACCAGGCGCGCATACGCGGTGACGAACACCAGTCA  
GTGCCGCTTGCTTCCCGGCAATAGCCAGCGCGTCCTTCTGATCAAAGCGATTTCCAA  
CGCAAGACCAGCCGTCATTCACTGCTCTATCGATGTTGTACACATCGGGCTGGTGTA  
CCGGCACATTGATCATTTTCAGTTCCTTTTAGCGCTAGCAGCTGTCGCCTGGATGCTTG  
GCCCTAGAGCTTGATCGCCTTACACACAGCGCAGTCAGGATTGCGTCGCGCCGGCG  
TATCGGCAGTCGGGCAAATGTCTACGTCACTGTGCTGCAGAAGGCCCTCCAGCGCCT  
GCCGCAGGATATGGACTGCTCCCCAGCGCCATCTGCAGCCCGAAGCCATCGCGCA  
TGTGCGGTCCCTGGCGTGGTGACATCACCACGCCACGCGCTTCCGTGCTCGGTATTG  
AGCAAGACGTAATTGTGAGGCCGGTAGGTGGTCACGTCGAGTTGATAGAGTTGGCG  
GTGTTGTGGCAGGTGTGTCAGCGTCCAACAACCTGCGTCAACACTCGCGGCGCCGCA

GGCGCGCAGAGCTTGGAGTTGCCGTTTCACCCGTGTAACAGGTGGTTCACCTTGTGC  
CGCAAAAGGCTGAGCTTTGTGCTTGAGCACGAAGTACGCGAGCGGTGGACGAGTAA  
GCAAGTCGGATACCCGCAGACCTTTGCTACCAGCCAGTGTCAAGTGCCTGGCGTATGA  
TTACGTCCAGAGCGTCGGACGTGGGCATGCCTTCAAAATCGGTCTCAATCGGTGCGC  
TCACGTCCGATCATCCTCTGTCCCATGATTGCCATTACTCTCAAAATACCTGGAGATC  
GTCGCCAAGCTCGAAGACACCGATGTAGCAAGTTCGAGAGCCGCATCACGCTCGAC  
GCGCAGTTGATCGATCGTGTGCATGCGTTCAACTAAGGCTGCAGAGAGAGTACGTG  
CCTCGCCATGCGCTGCTGCGAGCATCGTTTCTGACTGCGATAGTTTGTCTCCAATGT  
CCTGGCTCTGTGCGAGGCTGCGGCCAGCTCAGCAGCACTTGCATCGAGTTGTGTCTG  
GTGTAGCTCCAGGCGCTCAGAAAGCTTTTGGAGTGCATTGAGCAGATTCATTCCCTG  
TTCTTGCCCCGACTCGCGCAAGCGATGTATGCCATTCAATATCTTCGCGTATGCATCT  
TCAAAGCGCTCGAAACGCTTACTCGCCGCGTCACGCTCATGGCGGGCTTCAGCCAAT  
GCAAGTTGACTTGCCTGTTACGCTCCTGGCTCACTGCGATTTCTTGCAGCGCGAGA  
CCCAGCTCATCGCGCACGCCGGAATGGCGGAACTCAGCTCTCGAAGTTCTGACTCA  
ACCTGCAGCCGATCCAGACGCGCTTGTTTCGAGACGCGACACGAGGTTGGTTTTGTCC  
GACTGAAGCTCGTGAATCAGTCGCTCTTGCTCGCTGGCGCGTTTCGGCCATTTTTGCCT  
GCTCGGCAAACAACGCCTCTTCTTTCGCATCCAGCATCACCGAGCGTTGCTCCGCAG  
CAGCCTCGCGGGCGCATAGCGCCTCCTGCCGTTGCCGCTCTGCATCCGAGAGTACCT  
GGGCTGCTTGCTCCGCAGCGTGGCGTATCTGGGCGCCGATATCGGTGATCGGTTTGC  
GCGAGCGCGCGTCGCCAACCTTGATGAAGAACTCGGCACCGTGTTCTTCAAACCATC  
GAGCGATGAACTTTGACAGCACTGGACCACTACCGCGACTGCCGAGCACCTTGCGA  
ACACTCATGTGCGTTGGCGCCTGGCCTGCAGCGAGTAGCTTCTCGATCGCATCGAAC  
ACTTCCGTCGATGTGATGCGGCTTGACTCGACCATTACAGGCTGATCCTGACTTGTG  
CCGAATCGATTCCAGCCTCCATCGCCTCAATGGCAGTGATTTTCATCGCGCAGACTTA  
CCGCAGTGACGCGAACTCCTGGGGCGACCTCCACGTCTTCGCCCCAAAGCCTCTATAA  
GTGGCTTCATGAATTCCTGCCCATTTGCGGCGTCGGTCATCTCAAACACCACCGTGC  
GAAACACTTTGGTTTCCATCAATTTTGCTCCTCATCTTCATTGCGGCGATCTTCCAGT  
TCCCATTTTTCCCGCAACTCGGCTTTTGCGCGCGACGCGGCGTCGCCAAGCTCCCAC  
AGGCGCGGGTGCGCCTCGTGGATCTGCTCACAAACCCTGTTGAACTCTGGGGTTTCA  
CCCTCTTTGAGGTAGCGCTCGATTGCCCGCAACGCGAGCTCGCTCCGAGCGCCATCA  
AGATTCCAGACGCATTCACTGACAGCAAAAGCACAGCGCGAATTCCAGAGCGACAG  
CATCAACTTCGCCAGACTGTTGGCGCTTCCGCTTCCTGGGTTACTCATGATCCACTGC  
AGTGCAGCTTCGTATGGCGACATCGGGATTCTCCTGAATGAATTTACAAAGCCTGCA  
GCGTGCGAGATGCGAGCCAAGGGAACAGCTCGGCGCCGACGGACGTGAGCCCCATG  
CAGCGGATGTCGCGCTCGCTATTCTCCTTCTCGCTGAGCGCCGGGTCGAGCACATTG  
CCCTCAAACAGCGTGCCACTGTGATCAAGATCATCACACCGCGCCTGATCCCGGTAA  
GTCCATACGGCGGATAGGTCGACGTAGCAGGGGGTCCAGTCTAGTTCTCCCTGTACA  
AGGCGCTGGACGGCGGGCTCCGGTGTCTTGTACCAAGCCCGGATGAGGTCGACGCA  
CGCCTGCTTGCCCGCCGCAATTGGCGTTTGCATAGCAATACGCCAAGCTGTCGTGCTC  
GGCCATCAGCATGCAAGGACGGCCACGCGCATGCACGATCCCGATCGCAAAACGCA

GCCGATGCCGGACGATTTTGTGCTTCTGCTGCTGATTGCGTGGCTGGCCAGATTTCG  
CCATATCCAGTCCGCGGGCGAAACGAATCAGACTGCTGCACCGGCAGTGCCAGCAGG  
CTTTCAGCCTGGTCGTAGCGCAGCGTTCCCAGAAGCGACTTCTGCGCCAACCATTTTC  
GCCGCACCGTCATCGATCGTCCGATCGTGGCGGTCCAGATAGGACGTGGCCACCGG  
GTCCCCCGCGAACCTGGTGATGTATTTCCAGTCATGGATGACATGCTCGCTCGCCGA  
GGCCCGTAGGAGCTCGCGCTGCCACCCACCGAGAACGGCCTCCCCAGTATGAGGAT  
CGAAGGTGACTGCTGCGGAGGAAGCGTGCCGCGCGTCCGCCAGCAGCACCTGGTGC  
TCGCTGGCTACTGGCTCCAGGTAGACCTTGAACCTCGCCTTTGCCGGTTGACACCAAT  
CGCAGCGGGCCGGCGCCCCTGCCGCTGGCACCAGGCGTCCACTGCCGCAGTGCGGGC  
GGCCTGGTCGGTCAGCAAGGCATGCAAGGTGTCCAGGGCGCCTTTGCGGTAGGCTG  
GATAGCTGCTGCTATCCGGCGCCGGCGAGCATTTGTGCGGACGGGCAGTGCGCGCA  
ACAGCCAACGCAGCGGTGATCGCCCCCTCCAGGGCATCCGCGTCGTGCGGGATCCG  
CGCAGCGGCAACCGCCTGGCAAAGCTCGGCCCCGTAGTGGAACCTCGGCTCTATCGC  
GCTCGGCGACCCAGGTGCGGGCGGCTTGGAACAGCTGGATATAGTCGTTGTAGCTCC  
GACGTTGCGCACGCGAGGTCAGGTAGTAGGTCAGGTCGCTGGCGTGAACCTCGATCA  
AGCACCAGCACCTCCTGCATTGCCTCTCGACACAGGTATAGCTTGCCAGTGATCTCC  
CGGCCGGACCGGTTGTATCCCTCGTGCACCAAAGGTACTTCGATGTAGTCGCCACGC  
TTATCGCGGCGCACACAGCCGATGATCGGCGTGCGCTGTTTAAGCCCGTATACCCTG  
CTGTGGGCCCCAACGGTTGTTGAACTGGCGAGTTTCTTGTGATGCGAAAGCGCCGGGA  
ATGAAGCGCTGCTCGAACAGCGCTGAAGCCCGAACGGCGACCCAGGCACCCGCTGC  
CAGATATTGGTTCTGTTGCTGGCGATACGCGTCATAGCTTGGTCGCTCGACACCCAG  
CATCACGCTCTGGTCGACCAGGCGCAGATAGCGCTCCTGGAAGCCCCAGTCGAGCC  
ACGAGGCAAACGCTGGCACCAGCCAGTTGGCGAAGAGCACGTGCGGATCGCGTAGC  
CCCCAAAGCATCGTGAGGACCTTGGCATAGGCATCCAGCGCTCCGAGCTGGCGGGCG  
CTGTGCCATCGCGTACGCGAGGTCGTCGCGGGCGGATGGTCTCGCCGTTGCGACCACT  
GAAGTGGCCGAGCTGCTCGGCGCGGTTGGGCATGAGCTGTTTGATCTTCTGCAGGAA  
TTCGGGGCCTTCGACCAGATACACCTGCTCGCCATCTCGCACCAGCAGCATGTGCAG  
CTGGCTGATCTGGTTGAGTTGCTGGTTTGCCATGGCCGCGCCAATGTCTCCGGGGCG  
CGAAGGCTTGACGAATTCCTTGTAGCTGCTGCGGAACCGGCACAGCACCATGCCAC  
GTGCCGCGGCGACCAAGGCGTTGCAGCAGCGCGTCGTGCGCCAGCACCGTCGCCACC  
GAGTCCAAGTGCGTGTGGTCTAGCCCGTTGACTTCCAGGTGCAACAGAAGTTCTTCG  
TCGAGTGAAAGCAACTCTTGGTAGATCGTCAACGGCAGTTTCGGCCGGCGCCGATGC  
GCCCTGGCGCAGTTGAGTCACCTCGACACCATCGCCGGTATAGATCTTGAGATTCTC  
AACCGTGCGCAAAATGCCCTTGACCGCGTCCAGCTGCCCTTGGGCGGGCCGCGCAGTCC  
CACCGTGGCCCGTTCCATGTGGAAGCGGGCGAGCGCTTCGCCCTGGCCCTTCAGCGC  
CTCGCTGTGTTTCGCGATCCACTTCTGGGTGCTTTCGGCGTTCTTCTTCAGCCGCTCG  
GCATAGACCGTCATGTACGCAGCTGCTCGGGCGTGGCCAGCGCCTGGCCCTCGGCT  
TGGGTCGGGGCGCTGGGGTCGTAGCCGAGATTGGCGATCGGCTTGGCCGCGGGCGG  
CGGCTCCAGCAGGCGCGCTTGCGTCTGCGCCATCTCCTGGTGCAGCGCCAACAATTC  
GCGCTCGCGTACTTGCGCGGCTTCAGGGCAGTACGTCCAATAGCGCCAGAAGCAGT

CTGCATGGAACAGGCTGGGGTAGGCCTCTCTTTCGGGCACGCCCCGGGTGGGCGGCG  
AACTTGTAGACGTGCGGTTTCGCCATCGGCGTACTCGATCGATTCCAGCAGCAGCACG  
ATGCCGGCATCCAGAGGGTTGCTCTCGATCTGCTTCCCGTCTTCCTCGCCGGTGACG  
TCTTGCAACAGGCGCCAGTACGTGCCTGGGCGCGGCGCGTCGAAGCGCTCGAATCG  
GGACGACTCGCCATGCTCGACGGCACTGACCACCAAGGCGTTCTCGTTCACGTCTAT  
TCCTTAGGTTTGCGACTGCTTGGCAGTCAGGTGGTTCGTAGCGAGGACAGACTCGTC  
AGCCGTAGGGCTCTCTTGGGATTTCTGGTGCGCCACACAGCCGGCACGCGTAATTT  
GTACCCGACTCCCCGGAACCGCCGCTGCAGCAGATCGCGGTCCCCGGAGTTCAGCCA  
TGTGTGGGGCGGCCATCAGCGCCGCGCCCTGCGGGTTGATGTGCGGCCGCTGGCTTG  
TCACCACGCCTGCTTCGAGCAGCGCATACCCGATAGCCGATAGATTCATGCCTCGGT  
CGCCGGAGGCCACCAGGGCGGCGAGGATCGCTCGCTCAATCGTAGACAGCTCATCC  
ACGCGACACCCCTCCAGCCTGCGACAGCTGGGCTCGGATCAGGTGCACATCCTCTCC  
AGCTTGGCCGCTTGCGTTGCAGTGCTGCCGGCTGGCAAGGATTGCTTGGATCTTCGC  
CTCGATTTGTTGCTCGATTGCAACAGCAAGCATCAGTTGCTGGGCCATCACTGCGGC  
TGCGACGAAGTGATGGCTTCGGGCAGATCCACGCATTGGACCGGCGGCAGCGTGTG  
GGTTCCAAGCATGGCGGCGCGACACGCGTTCCAGCCGCTGTTGTAGCTGCGCTGGTT  
CGATGATTGCGGTTTCAACTCGTCTTTCTGTGCGGCACGGTCGTGCTGTTGCTGCC  
TGCGCTTTTCGCTTTCAGCAGCTCGGAGATCGCGCAAGCTGCAGCGCGTAGCAATGTC  
GCGCTATAAGCCCGTCTACTTCCGTGAGTTCGTCCGCATAGCGGTTCAATCTTTGG  
GCGAGCGCCGCGGAGTGATGTTTCGGGGCAGGGTTGTCCTGTCCGTGGGCAATGAC  
CGGCGCAGGCGCATTACGAATAACTTTGTGTTGCTGTTCTCAGACATTGTCTTCTCC  
GCTTGGGATGTTGGTAAGCATTGCTACTTGCTGGTTCTGACCTCGACAGCAAGTGCG  
TGAGGTGCCGCGTGTACCTCGCGACCTCCTTTTCGGTTTACGACTGCGTCCCGCCGAC  
CGGGTTGGCCTCCAGGCTCAGAAGGGCGTGACGGCCCGTCTGTGTGATTGCGTAACC  
GCGTTGTTTCGCCCTCGCGGTCCAGTAGTCGATCATCTTCATTCGCTCCAAGTGGTGG  
AGCGGTCTAACGACCATGAGTGCCGCGCCCAGCGCGTTGGGTTTTTCTCTGCGCGGG  
ACGATGTCTCCGCTGCCGATCAAGCAGTATCCAATCGTGCTGGGGATCATTGCTCT  
TTGCTTGATGCAAGCCGGAGCAAGATCGCCATTTCAATTCGGCTCACGCATCCTCTC  
CTGCCGCTTCTACTGGGAACGGGTGCTGAGCATCCCGGCAATCGTATCGGCTGCCA  
CAACCATCAATGTTTCCGAGCAATCCAGGCACCCAAGCACAAAGCTGCACTGCACC  
TCGTGCGTCCGTAGACGGCCGTCCACGACATCGGACGCGGCGCGCTTGTGTGCGAA  
CCATTCAAACGCTGTGCCGCCGCGAGTGCTTGACGCTTCCGGCACGCCGGACACGTG  
CAGCACTTCCACCTGCACAGGAGCAGCCGCGGGCGGCACAGCGTGGCTCGCCTGCT  
GTCCTTTCTCGTGCGATGTAAAAGCCGCAATCGCTGCATCAGCGCAAGGCAAGTAGT  
CTTGCCAGCGGTGAGCATTGCCTTGCGCATCCCCAATGTGGTCCGGCACCTCCTCGC  
ATGCCAGACAAACAGCACGTGCGACAGCCTCGCGCTCCTTCTCGATTTCAAGCTTTG  
CAGCCATGTGCGTTCTCCGATTTCTTTGCAGTTTTCGAACTGGTGGACTGCCGCAACG  
CAGCTCATGGGCCTACGCGTTTGCGCTACGCCTTGGCGGCCTTGGTGGCCTTGGCAT  
CCTTGTCGCCATCCGTCCGCTGGAGCTGGGCGGCGATCCAGTGCTTATCGCGTGCCA  
TTGCGGCATCGATCATGTCCCTGATCTCTGAGGCCACAGCGGGTTCGCAGTACCCA

TTCCGATGCCGTAGACGACATAGGGCGTGCCGCGATCAATCTCTTCGTGGTTGATTG  
CAAAGTCACAGAGCCAGCGGAATCGTTCGGCGTCGCGCTGCTCGTCTACCGGCAA  
ACCGCGGGCACTTTCGGTTCGGCATAGAATCCCTTGACCCGGTAGACGCCGAGGTT  
GGGATCTTCCTGCCGTTCGATTTCGTATACGGCACCATCCAGGCGCCTGGGATCCGGA  
TCGCCCCATCGGGGGACGTACCAGCTGTGCTCCACGCTTCACCATTGACCACGGCC  
TGCAGCAAGAAAATGTCAGGCTCAATGCTGCTTTCATCGGTTGCCATGTGCGTGCAC  
TCGTGCTGTGTTGAAGGGCGGTGCGGCGGCCTTTGCCAGGCGTGCCGCTTTCGCGAG  
GCAGAACTTGACAGGTGACGGCTTCGTGCGCGCCAGCGATGTTTCATCCCATCGCGGCT  
GCGGGCGTTCATGCGGCCGCAAAGCGTGTTGGTCTTGGTCATGCCCATGCGCTCGAT  
GCGGCGGCTCGCGTGCAGTGTTCATGGGCGCGCTCACGGCGATGTCTCGCTGCTGATG  
GCCAGCACCGGGCGGCCGCCCATCGTCAGCCCGGGCACCAGGCGGGCGGTTCAGGCG  
CGCGAGCTCGGCCAGCCGACGGGCATCGACGCGGGCGACTTCATCCCGCGTAAGAC  
GCGCTTTCACCATCGCCAGTGCAGCGGCGATCGCGCTGGCGCTGCAGTTCCTTGCGCA  
ATTGCTTGCGTCGATCCGCCAGCCCGTGACGCGGGCAGTCCTGCAGCTGGGCCCCGG  
TATCGGCGGGCCAGCGGTGGTGCTCCCGGGCAATGGCCACCCAGTACGCGACGACG  
GCGGTTCATGGGAGCAGCTGCTCGTCAGCGAACC CGCGGCGAGCAGTCGATCGCGG  
ACCCGCTGGGTTCATCGGGCGCTGCTCGTACCGCGCAGGACCATGCCCGGTCCGCCTC  
GGCACTTTCTGAGCCACAAACACCTGACACAGGTCCTGATCGTTGTTCGTCCGTGGTG  
GCCACCACATAAAGGCCGTCGTCCGCCTGGGGCAAGCGGAACAGCACTGCAAGGGC  
ACTTCGTCGTTGTACTTCGGCATCATCGATCTCCTGCGCTGGATCTGGCGGTGCGTC  
CATTCTACGGGCTTTTTTCGGCCCTTGTGCAATGAGATTACACAGCGTATTACGTATCC  
CATCACAAAATGAGCAACGTCCTACAATTACACCTGTATGTCGTGATTCAGGTATGC  
AAACATGGTTCATCGCCCGGCTGTGCGCCGGTGATTTAGAAGGTCGGTATGCTGGGC  
TCGCAGTCCGCGGGTCGCCGCGCTAGGAGCAAGTCGATGGGCACGAAGGCCGCGAT  
CGAGAACACACAACCGCCCGCGTTGCGGCAGGCGACGGTGCTGGTACCCGCGCCCA  
AGATGGCCGAATTCACCAAGCGGCTTGAAGCACTCAATAAAAAAGCGGCCAAGTTC  
GGGCTCGATGCCCTCACCGTCGAACTGGCGCACGTCACGCCTTATCTGCAGCAGCGC  
CGGGTGACGGCGCAGGCGAAGAAGTGACGCTGGTCCCGTGGAACACCAGCGCGCC  
GCTGCCAGCCGACGCGGTGGGCCTGATCGACATGCACAGCCTGCTCCTGCGCTTTCC  
ACTGGTCAAGCTGGGCGACTGGCACGTTGTGCGCCAGCTCGATGCCACGCCTGCGGC  
CGGCGCGCTGGTGTTTGCGGTGACGGACGTGGCGGACGATCGCACCGAGGCGGCAC  
GCCGCCGTGACCACCCCATGCACTGTGAGCATTGCCACACGGCCCCGGGCACGCAAG  
CAGATCTACCTGCTCCGCAACACCAACACCGGAGCGTATCAGCAAGTCGGCAGCAC  
ATGCCTGCAAGACTTCACGGGGATCGACCCGGCCCCGGGCGCTCTTCCTGGCCAAGCT  
GGCCGACTTCCAGCGCTACGCCGATGCCCTGGGCGACCAGGCCGCCGACGGGGCGG  
CCGGGGCAGTTGCTACCTTGGACTATCTGGCGCGCGTCGTGTTCTGTGCGAGTCCA  
GCAGCTTCATCCCCGTCAGCAAAGCACGGGAATCCGCATTGACGCCACCTACCTGC  
AAGCGACCGAGCTCTCCGACGCGCATCGACGCAATCCGGCCGCTGGCCGCGCCTTC  
GCCGCGGCGCGGGAACGTCTGCAGGCCGAGGCTGCCGCGGTGGTCGCTGGTTTGC  
CGGACGCGAGCCTACGGACGCGTTCGAAAGCCAACGTCAAAGCGGTGCTGGCCAGCG

ACACCATCAAGGCAGATGCCCCGCCACCTGGCGACCGCCGCCGCGGCCGTGCCGACC  
TACCAGCGGCACCAGAGCGCGGGCGCAGCTGCTGCTGCGGGCAGCTCGCTCGGCGCA  
CGTGGCCACCGAAGGCGACAAGTTGGAGCGGGCCCTACGTGTCTACCAGGTCGCGA  
CGATCGACTCACACTTCGGGGCCGCAGGAACGTGTGAGCCTGGTGGATGACGACGGC  
AACTGCTTCACTTGGCGCACGGCTGCCGCGCCAGGGGAGCTCTTGAGGCCCAGCAA  
CCGCGAGCGCCGCTTTGATGCCGGCTTCAAGATCAAGAAGCACATCACTTCCCAGG  
GCACCGCAATCACCGAGATCTCCACGTCCGTGTCAAGCGCTGGCTGCCCTAGCAAC  
GTCTGTGGGCCAATCGCGACACGCGCAGGTTGCGTGCGCCCCGCGACGATGGTGGAT  
GGCCACCGCTACCATAGACCGTGTGGCTCAACACGCCGGAGCATGGGTTGACAGAC  
TCCAGGCAAGTATCAAGACGACGGAGCAATGCAGTGAAAATGAGCGGCGCAGAGT  
ACAAGGCCTGGCAGTCATCCGAGTGGGGTAGCGCCTGGTGGGAGGAGTACGAGATG  
TTGATCAACGGCGTCGTCGTGGATGACATCGCCCTTGATGAGGTCAAGGATGCCGAC  
AAGATCGTCATCAATGGAGGCGTGGTCTTTGCTGATGAGAACGACCGCGCTGGCTGT  
TCGGCGACGTTCGCACTTCAACAGATGGAAGAAAGCCCAAACCACGCAATTCGTCAG  
CGTCCAGGTCAGCAACGATGACGTGCAGGCACTCCAAGAATTGCTCACGCAATTTG  
GTCAAGGCCGCGACGCATTTCAAGGTCACGCTCGGCAGCTAACCGAAAAGACCTCTG  
TCCAGGTACCAATCAACTTTGCGAGAACGACACAAATGCCTACAGCCGGTCTTGAA  
ACGGTCTCCGAGCACCATCAACGAGCGAGAGCCAACGATCGCAGTCCGAGTTCCAT  
TACCCACCGCTCAAACCGGTAACGGCCATCTACATCGACACCGGGCTCGGCTACA  
GGCTTGTAGAAGCAGTGGTGAGCACGCCTTTTGGCATTTCATCGTGGCGCAGATGGGG  
AGAGCTACTGTTTGTGCGCATATCGCCACCGGTTACCGGATCGCCAGCGGCTTCGCA  
CGCTCGATCAAGTCCTCGGTCTGTGCGAAGACTTGCGCCGCATGAAGATCACCTGGG  
ACTTCACGGACAAGGCGGTGATCGCAGGCTGGTCATCCTATGCGCGCAACAAAATC  
CTAAGCCTCATCACCAAACACGGCGGAACCACCGGGAGCACGACGCGATGACCCAT  
AATGAGGCCATTACGGCGCCCGAGGCATCACCGCAGCTGGTGAGCATCCCGCCCGA  
GGTAATTCAGGCTGCAGCGATCACATCCGCCGGCGGGCGCAGCAGAGTGGAACCTAC  
TGAGTGCCAGAGCTCAACAAGAAGCACATGCCGACTGCGAGGTGATCATCCGCACC  
GCCGTACGCGCACTGCGGCAAGCAGGTGTGGCATCGGATGGAAGCGATGCGTCTAC  
GATCACGACCATCCGCAGACTCCGCGCTGCATTGGAGTTGATTGCTACGCAAGGGCC  
GCACTTCGGTCACGATGGCACGCAAGAAACATGGGTGCATTGGGCAGATATTGCCC  
GAAAAGCATTGGCCGATCAGGCCGTGCGCTACACACACCTGTCCACGCAGCCCGAC  
CAAATGCCAACCATCTCTCAACAACAAGAACCTTCACACTGGACCGAGACCTTGCTA  
GCAAGCGCGGAGAACTGCGTGTCCGCATTGGTGGACAGCCGGATGGCGATGCCGA  
TGATCTCGAGCGGCTAGCTGCAGCGATCCGCGCGCCGAATGGCTACATCGTGAAGG  
TTGGGGGTGCGGCCTATCGCTACGACCTGTGCGCTTCTACCGCCGCCTACGCCCCGTG  
AGGCTGCTCTGGCGACGGGGCTGGAACCGGAAGATTTTACCGTCGAGCCATTCCCTGG  
TGATCCGCCCCATGAGCAAGCTGATCGCGCCGCTATGACCCCCACCTCCAGCAGGATC  
CAACGCGTTCGCCAGGCCGGCAGCGAGCATCAGGTGGTAACGGTCCAAAGCCCCAA  
ACAGGCCAGTGACGCTACTGCAAGCGCCCATGCCCTGATTGCCCTGGCGGGTTCG  
ACGCGGTAGGCAAGTGGCCAGCAGAAGCGTTTCGTGCATCTGCTGAGACGGCTTAT

GACATGGCCACGCACACATTCGCGTGCCACTCTGCCGGCGCCACCTACCCGCGGCTG  
TGCGCAGGGTTCCTCCTGCGAGGCGCAGACCACAACTTGAGCGTCCGCCTTGAGCGC  
ATGCAGGGTCGTGTGGGCAGCGATGTCTGAAGACGGCGGGCAGATCCTTCATGCATC  
CTATGTCTGCCATGGCGGTGGCCAACGGGGTACCGAGCAATGATCCAGCACTACAGG  
CATGCCGCGAAAGCTACTTCGAGGCACAGCAAGTTGATTTGGGTGAGAAATGACTA  
CTGCTCCTGAGGGCTCTGATTTTGCTGTGAACCAACCGGTGCTCGGAAAGCTCACCG  
AACGTGCCCTAGCCCGCTATCAAAGGGCTTACGATCAACGCGTCAAGCGCTATCTCG  
ACTTCGACAAGTTCCGGGATCATGCCGAGGGCCTATCCACACGCTTGCCCTCCGAGA  
ACGAACAAATAGCGTACTTCCTGTCCTATGGCTTCTACGTGCTCGAAGGCGGGAAGA  
CAGCTGGCTGGGATGATAGTGTCTTAAGGTCCAATTCGGCAGCCGCCCCTATCTCA  
CTGCGTATGGTGAGCCTCAGTTGGTCTATGGCGAAATGTCAAGGAGCCTGCGTGTAT  
TCACTGAGCAGGGCGCATCGCTTTTGTATCAACGTGGCGACGATGGCCATGTCATGT  
GTCTCCTCTACCTGCCTCATCGGAGCGAGAGCCAAAAACGGTTTCTATGGTGGTGC  
TCAAGGTCGTAAACGATCCTTCCAATCTTCTCAACGATCGACTGCTCCGTAGCCACC  
TGAAGAGTCTTGCTGCCTACATGGCTGTGACCAGCTTAGATGGCTCTCCGACCATGT  
TGCAGAGGTGCCGTTACTGGTGGCTACACCTGACAAAGCAGCGCACGATCGGCGGC  
GTCGTACGACCACGTCAGATACAGGTGATTGCTGGCAAACCTGCTGCTCTGGGTAGCA  
ACCGTCGCCTTCAGCGGTATCGCTCTTTTTTTGATTCAGCGCAGGTGGCCCCGAAAAG  
GATGCCGTCACCCCAGCCGTCCTGCAGGCCAGCCAGGCAGCGCAGCGCAAGAGTGA  
AGCGCAGCTCCGAGTGCTGGAACAGATCCGAGACACAATGGCGGCATCTGCTCCAA  
CCCGTGCGACGCCATCGGCGCCAGTGAAAGTATCCTCCCCAGGCGCGCCAGCCGAG  
AATGGAAAATAAATGCTTCGCATACCCTACCCCGTTCTCTGAGGAAAAGCGCGACGA  
CGCGCTACAGGCATTGGCCGCTGGCCAACCGGTGAGCATTGGCCAGGCATCCCTGC  
ATCCAGACCCTGCGGAGGAAGTGATCTGGGGAGTGGATCCCTACGGCATGGACTGC  
CTTCTCTCCGCCGGTGGAAGCGGAAGATCGAGTTGCGAACTTGCAATCACCTGGGCG  
GAGAGTGTGCACGCGGGTACGCACCGTGCCGAACCTAATTATGACTTCTAAGCAAG  
ACACATCAGGGCGACCAGCAGCAGCAGTTGAGGGGGCGGCGTAAGCGCACATATGCA  
AAGTCCCCCTTCATGACGCCAGGTGAAGGGGTCCCAGTTGCACCAGCTGTCCAGAC  
GGCCCTCGAAGCATTGCCGGCGCCGCACCATGGAAAGCTGGAGCTTGTCGACCTGC  
CTGTACAGGTTCCCGGCGTTCGGTTCGAGCTCACCATCAAGCAGCTCGCGCAGGCTC  
AGGCCATCTTTCGAGACCTGTTACACACGAAATCCAGCCGTACGCGGACAACAGC  
CGCAAGTCTATCCGCACCGATTGGCGGCACTGGATCGCCTTCTGTGCTGAACGTGAT  
CGCGTGTGCATGCCAGTTCAACTCGATGACCTCATTGAGTTTTTTGAACAGTCTGATT  
GCAGCAGGCTACAAGCGCTCAACGCTGGAGCATTTGCTCTTCACCCTCAAGCTTGCC  
AGTCGCTTGTTGGAGCTGCACCTGCGCGACCGATACACTTCAATTCCGGTGGTATTGG  
CGACAACAATGCCGCGAGCAGCTCACTGCGCGGAAGCACCAAGGCACCGGCTCTGAA  
TATTGAGACCGTCGACGATGTCGTCGAAGCTCCGAACAGTGCGTCAGGACTTGCCGG  
GCTGCTCGAGCTTCGCGACATGGTCTATGTGGCGGTGTCCTACGATCTACTAGGACG  
CGCCTCAGAGATGGTGCGGTTGCGGTGGAGCGATGTTCACTTCGGCGCTGACGTGGA  
GGGCGGAGCGACATGCACCATCTTACGTTCAAAAACGGACCAGCAAGGCGCCGGCG

TCACGCTTTACCTAACGCCGCGTTTCGGCCCAACTATTGCTCACGTGGCAAACGCAAC  
GTTTGATCGCTGAGAAATATCTCTGGCCAGCTGCGCGTCGTGAGTACTTAAACAACC  
CCTACATCTTTCATCGGCTACCTCGACATAGGCTTTTCGAGCCGGCTCCGGCTGCAG  
ACGCCAAGCGGTTGCGCTGGGATACGCATTTATGTGTGCGTGAAGCTGATCGAATCA  
TCAAGCGAGCTACCGGTGAACAGTTATCTGCTCATTCTGCGCGCGTCGGCGCTGCGC  
AGGACATGACGCGCGCCGGTATGGACCTAGCAGCCATCATGCAGGCTGGTCGGTGG  
AAGACGCCAACGATGCCTGCTCGCTATGCAGAGAACGAGCTGGCTACACGGGGCCGG  
TAAAAACCGGCAGAAGGCACTGGCAAAGCTACGGAGCAGCTGACCACCACATCCTG  
CACGTGCGGCTGTCAAGATATGCACATCGCTGCAACATATTTTAAAGGAGCAAAGAT  
GCTGACCAACGAAGGCACACATCAGCTAGCCGAGAAGTCGGGGGCTCTTCGACGCCC  
GTACCGCGCTCAACACGCTCACCCGGCTTGAGCACAATGGACTTCCGGTCCCTTGCGA  
GCTACGACCTCACGACTACAAAGTTGCGAGTGACCTGGAACGTACCTGCACAGTGC  
CGGATCCAGGTTCCCGAGCCCATGGTAGGTGAAACCTTGGCCGCGCTTCGCTATCTG  
AGCGGCATAGCACTCCGTAGGACATTTACGAAAGGGATCTGGAGAACCACCGTCGT  
TATTGCCAGCTGGCAATTGACGGATGTGGACGAGGACGACGACACTGAGCAAGACC  
TAAGCCAGACGCAAGCGACGTTGCACCTGGCACTTCCTTTTCGGTTCCAGATTTGAG  
GCACGACGGTGACTCATCGGCGCCACGCGATAAAGGAGCATGCGGATGGGCGGAA  
ATGCATTGAAGACGGTTGCAACTCACCGATTATCGGCCGCGAGCTACCGTCAGCTGG  
CTGCGCAGGTCATGGACACGCTGCAAAGCGAAAGCGGCTTCCGCGTTGAGCTCGTG  
CGCAGCTTCGGCGCCAAAGCCGATTTTCGGTGATATGGATGTGATCGCCGATCGCAGC  
ACGCTGCCGGCGGACGTGGCAGCGCTGATGCGCCACCTATTCAACCCACACGAGGT  
GGTGAGCAACGGCAATGTCCTGAGCTTCGATGTAGCCGCGTTCCAGGTTGATCTGGT  
GTGTGTGCCCCGCCAGCGAATACGACACCGCCCGCGACTACTTCGCGTTCAACGATCT  
GGGCAACCTCATGGGCCGTACCGCTCACAGAATGGGATTACGTATGGCCATAACG  
GGCTGCGCTACAAGGTCCGGGACGGCGACTACCTCGTGGCCGATCTTACAGTTACA  
ACCGAGATGCCAGCAGCTTTTCGCGTTTCCTCGGCTATGACTATCGCCGCTTCGATCAA  
GGCTTCCATACCCTGGAAGAGGTATTCGCCTTCGCTGCCAGCTCTGCCCCTTCAAT  
CCTGCCGCCTATCCACTGGAATCCCGTGGGCACCGCGACCGCGTTTCGTGACCAAAAG  
CGGCAGAACTATCGCCTCTTTCTTGAATGGCTACAGACGGCTGGTGTAGCCGCAGGA  
GCATCAGCAGACCTGCAGCGCGAACACCACCTACAGCGGGCACTGAAGCAATTCCC  
TGCTTTTCGCGGAGGCACTTTTCGCAATCCCAGGAAGCGCTTGCCGGAGCACGTCGTCG  
CAAGCAACTATTCAATGGCCAGATCGTGGCGGAGCTCACCGGCCTTGAGGGCCGAG  
AGCTCGGGCAGCTCATGCGTGAGCTACACGATGCATATCCCGGTGGCCGTGCGGCA  
TTTGTGTCCTGGCTTGATCAGTTGCAAGATCACGATCTAACGCCGCTACATGCGTAC  
ATCGAGCAGGTTGCCGCTGATCTCGACCTGCAAGAATCAAAGTGTCATCCGTAGGCC  
AAAACGCCACTCTGTAACGTGTGCACTGAAAAACCGGGTCAAGCGCATGTGCAAAG  
TTTGGCAATTTCAAATTAATTGACACCACCTGAGCGAGGAACATTATGTGACCGAA  
CCACGCCCCGCTTGATCCCGAAAACTACTCGATGTACTCAAGTCGATTGATCGATCA  
CTCTTCCAACCTTGCGGCCGCTGCCCCGGCTTCCGCATGTCTACCCTGATACACAGACA  
GATTCCCTTAAAGAAGAAGTGGCAGATTGAAGTATGCCGATAAAACCGCCTATGA

GGACCTCACAGCGGCTAGTAACGAGGTATCTAAAGACGGTCTTACGTACGACCAGC  
GCGTGAGTAAGTTGGGAGAGCCTGAGGCGGAGCGGATCTACGCACCGGTGAGACGA  
GCGAGTCAAGTGAGAAGGGACAGTTCTGTGGCATTGGCCAAGTTCCGTGAAGAACA  
CCCGTTAATTTCCGCTTTGGTGGATGGCACTAAATCGTAATCAATGCCGCCGTTACC  
GCAGACCATTGTCCAATCACACATGCTCGATATCTTCGGTCCCTTGGCAAAAGATAT  
CGGGAACCTTGCCGACTGGGCCGCGGTAGCAGTCGCTTTGTTCGGTGCGATCGCAGT  
CTTTCAATTGAGCAGGGCTGCGAACGCTACGGCTCGTGGTGTCAAGAGGGTTCGCAG  
AGCGAGAAGCACGCGATCGCCGTGCGGCAGCTGCACGCGAGGGACGGCTGCTTCTG  
ATCTATCTCGAAAATGAATTCCGGCAAGCCCTCACGGCATTTCGGTACGCTGGCTACG  
GGTCTTGATGTGGTTGACCATGACAGCTTCATCGACAGCGGTTACGCACGCACACAG  
TTCCTATCAGAAGCCGATGGCATTTCGCTAAAGCTCAGCCGCGAGATGTTTCACCGC  
TTGCACGTGCTCGTCGATAAAGATGCACATGACATTGCGCGAGTCGTAAGTGGCTTG  
TCAGTGTTACAGCAGGCAGCAGCGGAAGCGGCTAGCATCGATCTGTCAGAGACCAT  
GCCTGGAGTAGATGGCGCGAGCTGGAATGAGTTTAGGCGAGAGACCTTGTCCGAGC  
GGTTTGTGTTGCTTCGCAAAGGAGCGGCAGAGATGCAGGTGATCCTAATTCGACTTA  
TCCAGGAGGCGGTTGCTGCCAAAGTCGTCGAGGAGCGCAACATCACACGCTTGAG  
AACAACGCACGAGGCCCTTCGACCGCGGGCTAACCAGCGATAAAACACGACAGATT  
GTGGCGCAGCGCTCGAACCCGCTATCGAGGCAGCGAACCTGCTTGGGCACCAAGTC  
GGATATGCGCCAACCAGCGATTCCCTAGATCGAGGAGGGGACGCTCAACGAACCTG  
TACGTCAGCAGCGCCACCACGCAGCATGCGATGAACGATGACGCAAGAAACAAAGC  
ATTCATCGTGATGGTCCCGGTAGGAGCCACCGCTATCCAAAGCCGACCGCTGAGCG  
AGAGCACGAACACGTGTGTTAGGTACAGCGAGTAGGACGCGTCACCCAACGCTGCG  
GCCAACGGCTCACTGGCCACCAACCCGCGAGCTCCAAGCGCGCAGCTGCTGCCAG  
CGTCAACGCGCATGGAATCGCAAACGCCAGTGTTTCGAACACCGTGCGTCTGTCCGA  
AATCGGAGCGATTTAGCAAGGTCCATGCAGCCAGAAGCGCCAGCGCAACCCCTGCG  
CAAAGCGCAACAACACCTTGTCTGGGGCTCAGGCTCTTCCAGAGAATCGCCGCTGC  
GGCGCCCGCTATGAACTCAAACGCCAACGGACTAGTGACCAACTGCGCCCAAGGTC  
CTTGGACAGGCACCCACTGCAGTAATGCCAGCGCAACCGCCCAACCGCACAAACATG  
AACGGGATGTTGCGCTCAGAGCCGAAGGCAAGCGCCATCGCAGTCATGAGGTAAAA  
GAACAGCTCAAAGGTGAGAGTCCAACCCACTACAAGTAGCGGTCCGCCCTCCTGAG  
GAAGCAGAAATAAGGAGCGGATTAAGCTTCGATCGAGCAGAGCTGGATCCAGCAGA  
CCAGGCCTGACAGACAGCACGAGGGCGATGGCGCCGGTGCACAACCAGTAGAGAG  
GGAAGATGCGAATGAAGCGCTTCGCCAAGAAGTCTAACGCCCCCTCTGATCGCCG  
AACTTGCTGAGCTCACCATTACCATGATGAAGCCGGAGATGGCGAAGAACATGTC  
CACACCCGCAAATCCAAGATGGGCAAGCCCGCCAGAATTTGTATCCCTCCACCGTA  
CACCACCTCAGCGTTGATGAGGTGGTAGACGACGACCGCTGCTGCGGCAAGAGCGC  
GCAGAGCTTGAAGCGATTGCAGCGGACGCGGTTTGCTTACTTCCATGCACAGTTGTC  
TTAGTCAGCGTAGTGCCAAATTATCCCTGAATCCACCGCCGAGTTGGAACGCCACAG  
TCACTTTTGTGTGGAACGCAGCTGTGGATGTTGCTTCGCAAACGTGTTGGACAACCC  
GTGGACCGGTGTGGACGGCCTAAGCCCGACCACGCCCGGCCACCGGTTGCCACA

CTCACCCACAGCAGGGCAACAGAGCACCGCCACGTTGCTCTGAAGAGGTCTGTACA  
AGGCAATCAGCAAGATAGCGAGCGGTGCACCATGGAGGTACGCGCCTAGACGGTCT  
TACAATCAGACCGGTGCAGCCGCCAACGGCAATCCAACCTGTGCGCGGTGGCTGCA  
CACTTGCATTGCAATTTCCGCACGAATGCGAGCAGCAACTTCTTCGCGATGAACCGG  
CACCGCACGCGGGCGCCACGATGTCCAGCTTTACCTGGCCATCAGAGATTCCATGCAC  
AGTGATGGTCACATGTTCTCTGACCATTAAGTGCGCGCCCACTCGGAGGTCGTATGT  
GCCGGGCTCATGCGCGCCGAGGCCAGCGATGGTAAGCGTCGCTCGGCCTCGACGGA  
TCTTCATGACGGTCACGGAAATAGTATCCGCGATCACAATGGATTGCTTTCTTTCC  
GAGTTAGGATCAGCATCGACAGCCTCTTGATGCGGCATTGTTGGCCGCCACATATG  
GCAGCTTATAGCCTGTGTTTTATCCTAACGAATGTGGCCGCAATACGGCAAGAGTC  
AGACCCAACCCATCTTGGGCTGCGTCACGTTTCGGCTCCCTTGTGCACGCTCGATAC  
CAGAATGCAGTCGTGCTCGCTCGCCTGCCTCGTAGCCTGCGCCAACATCGCCTACCG  
CAGTCTCTATCTCTAGGAGTCCGCGCGGCTCTACGCGGGGGCGAGCGTCCACAACCTG  
CTAGCCAGGCCTGCAGCTTTCTGAGCGCGTCATCCTTGTTTCATTTCGAGCCGATTGCC  
GTTCTTGGAGTCGAGAAAGCGGCGCTTCAACTCATCAGCGGCGGTGAACTGCACAG  
CCACGCGTTTCGCCTACTTGGACCGTCTCGCCCGTCTTAGGATTCCGGGCCTGTCGTG  
GTGGTTTGTGCTGGAGCCGGAAGCGCCCGAACCGGTTGATGTTACACGGCCATGCT  
CCAGCAGCATGAGCGCTACCACTTCTGTCACTGTATCTACGATGGAAGTGGCTTCTG  
CCTGGGTCATCGCGTGACGGTGCGCGATCGCGGATGCAAGAGCGCTTTTGTTCATAT  
ATCCGGACTCCTGGTTACACCCCCTGTGGCCCCGTTATATGCCGCAAGTGCCCGTTA  
TGCAAGCTGAAAAGACCTTTCCAGCCATGATCAATGGACCTTTTTTAAAAAGATTTC  
CTAACGTTTGTGCGGCACATGTGGTTATCGCGTATTGTCCGCTCCGTCCACCACCAC  
CATCGGAGAACGCAATGCCCCGCAAGTCTGAATGTCGGGTCGACTGCATGGGTTTCG  
TCGCCAACGAGCCGCAGCTGCGCCAGGCCAACGGCACGCCGGTAGTCAACCTGGTC  
GTCATCGAGAACGAGTACTGGAAGGATGCCGAAGGCACGCGCAAGGAGCGTTCCCA  
CGCACACTCCATCGCGTTCTGGGGTCCGTACGCCGAGACCGTCAGCAAGCTCGTACA  
GAAGGGCTCCTACGTCCGCGTGAAGGGCAACCTGCGCTACAAGCCGATCGAAGGCC  
AGCAGTACGACAAGGCCGCCGAAATCCGCGGTGATGATTTCTCCCTGCTGGACGAT  
CCGCGCGAGCGCGGCGAATCCCCGACTGATCGTTCCCCCCTTCTGCCCCCTCTCCGC  
ATCCCCCGGAGACGCAGTGCGCCCGGCGGGCATCCCCACTCGCCGGGCGCTTTTTTT  
TTGAGGTCTTGATGGTCACTGCGCTGAATGCTCTCCCCGTTGCGCTTGTGGACTCTGA  
AGCCCATGCGATCTGGGTGCATATCCGGGGGGCGCGCGGCGGTAAAGAAATCCGGCC  
AGGGCGCCGCATTCCGCCGCGTGGTGCGCGCCGACTATGCAGGCCGCCTGCGCCTCC  
ATTCCAACAGCCCTTGGCGTCCATTCTGTCCCGCCGCAGGCGATGACCAGGCCATTA  
AAGTAAGCCTGATCCGCGTCGGAAGGATTCTCGATAAGACCGAGTTCGACGGGCCA  
GAGTGGGATCGGCTGCAGAAGCATGGACTGGATGCGTTCCTGATCGAGGCGATCGC  
CACCCGGTCTTCCGCGGCGCCATGCGGCGCATCTTTGGAAGCACCTGACATGGCCC  
GTCCGCGCGCCAAGCACCTCAAGCAGGGTCAGGTATGGGTAGCCAAGACCGCCACC  
GGCCGTTCAAGGATGCGCCGCGTCGTTGCGCTGGTGGATGACAGGGTTTGTTACTCG  
ACTGGCTCGGACATCGTCCATTGGTGCAACCGTCGCGCCTTCCAGCTCTGGATCGCC

ACGCATGGGGCAATTCGATCCCGGTCTGTGCGCAAATCGCAAACCTCATCTTGGACCCA  
GGCCCCCGAACATGAGCCGAGAAGCCCTGCTGTCCCAATACATGACCCCTGACTGG  
GCGGCCGCCCTCTGCTTGGAGCGGTTTCTGCCAGATCTGGGTCCAGATGACCTGGTC  
TTCGAGCCACCTGCGGCCGTGGGGCCTTTCTGCGCGCGGTACCACTCCACGTGCCG  
GCGGTGGGCATGGAAGTTGACCCAACGCTTGCTGCGTATGCAGCTGCAACCACCGG  
CCGCGCGGTACTGGTGGGTGACGTGTTACGGGATCCACTGCCCAGCGGAATCACCG  
CAATAGTTGGCAATCCGCCATTCCGCGTCAGCTTCGTCAACCAGCTGCTGGCAAGAG  
CCCATGGGCTCCTGCCTGAACATGGCCGTGTGGGCATGCTGCTGCCCTACTTCATCT  
TCCAGACCGCGTCGAATCTCGAAGCGATCGCGCGTGACTGGTCAATTGAACAGACC  
ATGCTGCCGCGCAACCTGTACCCACGCCTTCGTTCATCCGCTCTGCTTCGCTGTCCTGA  
CCAAGGACCCCCACAAGCGCCTCGTGGGCTTCGCACTGTTTCATGAACTGGCTGCCG  
TCAACCGGCTGCAGCGGCGCTACAAGCAGCTGCTGCAGGAGGGCGTCGGCTCTGTC  
TGGACCGCCGTAGTGCAAGCCGCCTTGGAGCAGCTGGGGGGCACAGCCACGCTGGC  
CGAGATCTACAGGGAAGTCGAGGGGCCACCGCCCGACAACGAATGCCTGGTGGCAGG  
CGAAGGTCCGCCAAGTCCTCCAGCGCTCTTTCAGACGTGTCGCCCCGGGTACGTGGG  
CCATTCCAACACCTCATCACGCGGCAGTTGCCGCATAACAAGGAGCTGCATCCATGC  
GCAATATTCTGCTTGCCACCTGCCTCATTCTCGGTGCCGCAGCGGCACCAGCACATG  
CAAGCGAGAACATCTCGCTGCATGTAAAGGTCACAAACGGCAGCCAGGTGCTTGTC  
GATACCAACTTGCTCACCACGCCCCGGCGCGCCGGCGCAGGCGCGCGTGGGCAGCGA  
CATCAGGTACGTGAGCTCGACAACGGTCTACAGCCGCGGCAAACGCAGTTCCTTG  
GCGGCAAGAAGGGAACGCCGGTGGACCTGCCGCCGGCCGAGCGTACCTACGCCACA  
CTGTTTCGACGGCGTCGACATCACCGTGTACCCGGAGCCGCTGGCCGAAGCTGTCCGT  
TCGCCGGACAAGGTGCTCCTGCGCACGCGCGTGTCCTCAGCCGCCTCAATGGAATG  
GAGCACACCGGCGAAGGCGATGCGCGTATTGACCTGCCTTCCGTGCAGAATTTCCGC  
ACGCAATCCAACACTGTCGTCGCCTGGGGCTCCCCCAGGTCATCTCCTACAAGTCT  
GCAGGCGATGAAGCGGCCGATGACTACCGCATCGAAGTGACTCCCAGCACCGCCAA  
GGCCCCGCTGACGGAGAGCACACCATGGCTGATACCGGCGCCCAACTCGACCTGTTT  
CAGATGGACCACGTGCTGCAGGCCTACGAAGGCGGCAGCGTGGTGGACAATAATGA  
GCTCTACGAGCACGTACGGGCTGCGGGCCGGCGTCAGCCAACAGGTAATGGAGGCGC  
GTCAACCGATCGGCGCCAGCGGGCAGCATCACAGCGTTGCAAAGCGACGCGTACGC  
TGGATGCAGCAGACCGCTCGGCGCCTCGGGCTTCTTGAGCGGGTTCCGGCGCGCCGC  
GGCGCCTGGCGGCTGACTGAAGAGGGCAAGCGCCGTACTGGCAAGGCGGCGCCCGG  
CGTTGCCTTGCTCGCGTTCTCGACCGACCTTGGCCTTGCGATATGGGGTAGCTGGGA  
ATCGGTATTCCCTCGCCTCGACGAGAAGATAGTTCTCTGCCTAACGAGCCCGCCATA  
TCCGCTACGAAAACCGCGGGCGTATGGCAATCCGCCAATCCATCTCTACGTTGACTT  
CATCGTCAAGGCGCTAGAGCCGATCGTCCGAAATCTGGCCGACGGCGGCTCCATCG  
CGCTCAATCTGTCCAACGACATCTTCGAGGCCGGAATTCCTCGCGTGAGCTGTACC  
TGGAACGGCTGACGCTCGCGCTATGCGATACCTACCGCCTCCACAAGATGGACACC  
CTGATTTGGTTCGAACCCGAGCAAGCCGCCCGGGCGGCGGTGCGCTGGGCCAGCATGAC  
GCGTCAGCAGTTGAACGTGTCCTGGGAACCGATCCTCTGGTTGACGAACAATCCGCG

TAACTGCGTCAGCGACAACCGTCGAATCCTTGAGCCGCACAGCGATCGGCACCAAC  
GTCTCATGGCACGCGGAGGTGAGCATCGCGAGGCCGTCAACTCCGACGGCGCCTAT  
CGGATTCACCAGGGCAGTTATGGCAGGCCAACCGATGGGCGTATCGCGCGCAACGT  
GCTCATGCACGGGCACCGCTGCGCGGAGGCTCAGGCCTGTAACCGCTTCGCGGGCCG  
AGCAGGGTCTCGCGCCCCACGGCGCCCCAATGCCGCTGGCGCTGGCCGACAACTC  
GTGCGCTTTCTTAGCCGCCCCGATGACCTGGTCGCCGATCCGTTTCGGCGGGCCGCTC  
ACCACAGGGAAGGCGGCCGAACAGAACGGTCGCAGGTGGATCTGCACCGAGCTGAT  
CGCCGACCACCTGCATTCGGCCCTTCCACGCTTTCCGCAGGCAGTGCCTGGCCCCCTC  
TTTCTAACTCGGACCAACTTCAATGGCATTCTTCCGCAATCTCACGCTCTTCCGCTTT  
CCTACCGCGACCGATTTTCAGCGAAGTCGACCAGCTCCTACCGGCCGTGGTCCTCAAG  
CCGGTCGGACCACTGGAGATGAATTCGCGCGGGTTCATGTCTCCCTTCGGTCGCGAG  
GAACAGGTAACCTCTGTCCCATAGGTTGGGTGATTTCTGTGGCTCACCGTTGGGGGC  
GAAGACAAGATCCTGCCGGCTGCCGTTCGTGAACGATGCGCTGGCCCCGAAGATCTC  
AGAAATCGAAGCGAAAGAAGGCCGCAAGCCGGGTGGGCGTGAGCGCAAGCGCATC  
AAGGACGACCTGATCCACGAACTGCTGCCCGCTGCCTTCGTCAAATCGTCTCGTACC  
GATGCGGTCCTGGACCTGCGCAATGGGTATATCGCCGTTGACACCTCCAGTCGCAAG  
ACTGCAGAAAGCGTGATGTCCCAGATCCGTGGCTTGCTGGGTTTCGTTCCCAGCGATG  
CCGCTGAACGCGGAAGTGGCGCCGCGCGGCGTGCTGACCGGATGGATCGCCGGCGA  
ACCGCTCCCTGAGGGACTGAGCCTGGGCGAGGAATGCGAGATGAAGGATCCGGTTCG  
AGGGTGGCGCGACGGTCCGCTGCAGCGCGCAGGAGCTGCGCAGCGACGAGATCGAC  
CGGCACCTGGACGCCGGCAAGCAGGTAACCAAACCTCGCCATGGTGCTGGACGACCA  
TCTTTCGTTTCGTGGCTGGCGACGACCTGGTTCATCCGCAAGCTGAAGTTTCTGGATGG  
CGCCCTCGACCAGCTGGAAGAGGCAGACCAGGACGGCCTGAGAGCGGAGTTCGACG  
CCCGCTTTGCCCTGATGAGCGGTGAGCTCCGCCGGCTGTTCTCGGTGCTCGAAACCG  
CCTTCAAGCTCAGCGCGGCGGAGGCATGAGATGAGCGCTCTCGCACGGTTCTTGGA  
CATCCCACGCGCGGCGCCGCCGCACGACTTGGAACACACGCTCGCACTACTCGACG  
ATATGCGCCGGCAGATCGACGCACTGGGCGATATCAGCCGCAACTACGGCCAGCTC  
AACCACAAGCTCAAGCAACGCAAGCTCCAGGACATCCACCTCAAACCTACGTGACAT  
GCGTGACGACCTCGCGCAGCGCGTTGTGCCCTCTATCAAGGAGACCTGATATGCGA  
ATCGCCGTATGGCCCACCGGTGACTGGTGTGAGGTCAAGGAGTCTGCGGAGTTCAG  
CCAACAGAACGCATTGGGTGACGACTTCGCTGTCTACACGGCTACAACCGTTGCCAC  
CGCTGAACGCATTGCAGCCAACGTCGAAGCTGGCCGCCCTCCCCCTCGCTGCATAGGG  
CAACCATGAATCGCCTCGCACTTCCCCTTCTTCTCACCTCTCGCTGGCCGCCTGCGG  
CAACGACTCGACGCCGAACGCGAGCTCTGGCCTTGATTTGGCGCAAGCAGCTGTCA  
GCAAGCTTGCGCCGCACGCGAAGGTGACCGGCGTCGAACGCGCAGCAGTGCCCGGC  
CTGCTGCAGGTCACGGTCGACGGATCCCAGGTCATCTACATCTCGGAGAACGGGCA  
ACACCTGCTGGCCGGGCAGATCATTGAATTGGCCTCGAAAGACAACCTGACCGAGC  
GCGCGACAAGCGCCTTGACAGAAAGATGCTGGCCGAGCTGCCGCCGGAGCGCGAG  
ATCGTTTACGCGGCCGAGGATCCCAAGCACACCGTGACCGTGTTACGGACGTTGAC  
TGCGGATACTGCCGGATGCTCCACGAGCACATCCCCGACTACAACAAGGCCGGCAT

CAGCATCGAGTACGTGCTGTATCCACGCAGCGGCCTGCAGTCACCGACGTATGCAA  
CCTCCGTCAGCGTCTGGTGCGCGCAGGATCGCAAGCAGGCCCTCATCGTGGCCTCAA  
CCGGGGGCGAACTTACGCCCCGCGCAATGCACCAATCCCGTGGCCGAGGACTACGCC  
CTTGGACAACGCTTGGGTGTGACGGCGACGCCGGCCATCTTCGCCGAGGACGGCCG  
TCAGGTCGGCGGCCTCTTGCCGCCGGCGCAGCTGCTGGCCGTACTCGACGGCCGGGC  
CCAGCGAGGTCCGACACAGCCATGATGCGCAAGACGTGGCGGCTGCTCCGATTGGC  
GGCAACCCGGCAGATCAGCTGGTACAGCTTTCGGTGCGGCTTGCGGTTCGACGCAAA  
TCGCCGTTGCGCTGGTGGGCGGGCGGTATGGTGTTCGCGACCCCGCCGTGGAGGCAC  
TGTTCTTCGAGGTGGATGACAGCCATGACGCATAGTCCACGGTCCGCCGAAGAAGA  
CCGACTGACCACGATCGCGCCGGCCATAGTGATCGCGCTCTCGATTGGAGCTGGCA  
GCCTCTTGGGCATTGGCTTCAGCCCCGCCTTCTTGCCGCCATCGCGGTGTACACGG  
CCATGGCCGCTCTCTCTGCATTGACCGGCACCTGGATGATCGTTCAGCGGCCTCGTG  
ACAGCGCCCAGCCTCCGGGCGAATAGATGGCGCTGGTGCCAAAACATGGCGCCCCA  
CCATTGGGGCGCCTCCGAAGTTTCAGCTCATCCTTTGCCGTGCGCTGTGAGAACTC  
CAGCCATGCGCGTTCCAATGCTTCCAACACGTGATCACCATGCCTGGCCAAGTAGCG  
CTCAATTTCTTGGCGGCTGCTTGCGCCGACGGGGAATGTCTTGTCAGCGCGCACATC  
CACCGCCAGGTCCGACACAATGTCATCACGATCCACCTGGGCCAGTAGCCAGCGAT  
GGAACGCTGATCGTGATTGCTGATAGGCCAAGTTGAGGGCCACGGCCTTTGCTGCCA  
GCAAATTGGGGGCATCCTCTGGTCGGCGGTACCGGCTCCGCCACACTGTGCCGCGCT  
CGCTCCAGCGCTCGATCGAGTCTAGGTATCGCATCTCGTGGGACTGCCCTCGATGCA  
AGGCGTCATTCTCGAAATGATCAGGGAGGCAGAACGAATCACATCGCGCGCAGTAA  
TAGGTGGAGGGATCCTCCTCGTCCTGGTCGCCATGCAGGTAGTAACGGATGGCCGCT  
CGCCTTATAGCTTCTTTGGTGGCCAGCTCTGGTCGACCACCAGGCGCGACGCATGCC  
TTCGACAATAGCGACCAGTTTGCGAACCCATGCGCAGTAGCAGACCTGTCTAGGGC  
CTCTGCGTGCGTAATAGATGTTTCGCGCACAAGCTTCTTAGCTTGACGCTTGATGCG  
GGTGATCTGTGCCGGAGAAAGACTGTTGGCCATGACTCAATCTCAACGGTTCGCTGCA  
AGGTGATGCGTCCACACACCAAGCCAGCGGCGACCTCTGGAGGTCAAGGCGGGTC  
TTGTAAGAGCCACACGCTGTCGATTGACTTCGCCTTGTGGACGGGCGGGCCCGCGC  
TAGGGCCGCAGCCAGCTTACATCGGGTCAGCCTCCTGTGCCAACGCCGCAACAGCG  
TCACCAGGCTGTTCCAATAAATGGAATGTCGGCGACCAAATGGAACCTCCCTGGACT  
TACGATCCCCTGCCGACCTTCGCAACTGGCTCTACACCATAGTTTGTCCGCACATGC  
ACCAACTATGGTGTTTCGCCCTACTATGGCAGTCGCCCCATCATCTTATTGATTCATAT  
ACAATTGTCCCGTAGAAGGCCAGATGCCAAAAAACAGGACAATTGCATGAAATTCA  
ATATGATAGTCGATGAGGGCCTTCGGCTGGCGGCCAACATGGAGACCCGCTACGAC  
GCCTGGCTGCAGGCCTCCCGCGCCATTGCAGATGGCCGTCTGCAGTGGAAGACCTCC  
GGCGGGCATGACTACCTATAACGAATCATCGATAGCAAGGGCAATGGTACCTCGCT  
GGGACCGCGAAGCCCTGCCACCGAAGCAATGATGGAGTCGTTCCAGAACGCCAAGC  
TAACGGTTCAGAACACGTGGGCCACCTTGGAGCGAGAGGGCAAGATGTACCGCTCC  
CTGCGCCTCCCTCGCATTGCATCCTATGGCGCCCAGGTTCTGCGAGAGCTGGACATC  
AGCGGCTTGCTCGGTGACTCGGTACTGGTCGTTGGCACAAATGCTCTTTGTGCGTAC

GCGCTCGAAGCTGGCCAGCTGCTGAGCTCCACGCTCGATGCGACAGAGGACTTCGA  
CCTGACCTGGGTCCGCGACGTCAGCAACGCGCCGCCGGCATTGCAGGCCCCCTTCGGT  
ATTTGGCGTGCTGAAGAGCGTCGACAGCACCTACACCATCAATACCGAGCGCCCCGT  
CCAGGCACGCAACTCCCACGGCAACGAAGTGGAGCTACTTATCGCTGAATCTCTGG  
CGGGCCTGCCGACCTACGAGCGGCTCCGGCCGATTCCGCTGCCAGAGCAGAACTGG  
CTCTTGCCGGGCACGCGTATCAGCCACATCACGTGCGGCATGGACGGCCTGCCGGC  
GCGAGTTGTCGCGCCTGATCCACGCTGGTTTTCGCTCCACAAGCTGTGGCTCGCCGA  
CAAGGAATCGCGCAACGTGCTCAAGAAGGGGAAGGACCGGGAGCAGGGTGACACT  
GTGCTGCACCTGGTCAATGACCATATGCCGCACTTCCCTCTCGATGACGCGTTTGAG  
GACTCGCTGCCGGACGAGCTCCGCCCCGTACTTTGAAGACTGGAAGCAGGAGAACGG  
GCTAACGCCACCAGGCATGCGCTAACACGTCCTGGCGGCGCCGCTGTCAAAGCTTCC  
GTTGCGCCGCCAGCTCCACCACTTCAACGCCGTTATCCCGCCAGCTGTTGATTGCAG  
CACGCACCTCTCCGAGCACGCGCCGGACATCTGCATCCGTAGCAGAATTTTCGGCCAC  
AGAAGAACTCGCGAAACTCCACCAATGTCATCCAAGCGGATACGATGGTGCGGCCT  
GCCTCATCCTCGCTAATGCATTGCATATCGGCTTCCCATTTTCGCACGCCACGCACTAT  
CCATGGCGGGCCGTCAGAAGCGCTCGGGCGTCAGCGCCTGACAGGTGCAAAGCGTCG  
ACCGCATCAACCCCTTGCAGCATGCCGTCGCCGCTCAGGCGGTACTGCATCGGCCAC  
AACCGGCAGCCTGCATCAGCATCCATATCGTCAAAGCTCGCCATCCCTATGCCACCT  
TTGCATACTGGAGAATTGCCGCGTACTCCGGGTCTCGCTCCGAAATTTTCGGAGGCAT  
CTTCCGGATCATTGGATGGGGCGTCCATGTTCAAGATGGCGGTTGTTGGATCCTCAA  
GTAGATCATTTCGATCGCCGCCTTATGCTGGATCAGTGCCATCGCTTGCTCATCAAT  
TGTGCCGGCGCAACAGGGGCACCAGCACCGTGACGACTCGCTTCTGTCCGTAGCGCC  
ATGCGCGATCTTCCGCCTGCTTTTTTGAGCGCATTTCGTCCACGGCAGCGAGGCAAAGC  
AAACGATGTTTGCCGCGGTCAACGTGTGGCCAACCCCGGCAGCCTTCGTGGTGCCGA  
TGAAACACCGAACCGTAGGCTCGCTCTGGAATCGATCAATCGCCTGCTGCTTACGGG  
CCTTGGAATGCTTGCCAAGGAACGTCACCACCTCAATGCCTGCTTTGGCGAACTCCT  
CGGCCAGGTAGTCCACCGTGTCTTGGAACTCGCACATGATCAGCGCCTTGTCGGAAG  
GCTCAAATCCGGCGATTGTCTCGATCAGCCAATCAGCTTTCTGACGTTCCAGGTACT  
GCCGCAGCCGCCAATCTTGGCTAGCGCGGTGAGGCTGGGGTCTGCCGCCATGCGG  
CGGTATTCAACGCCCTGCGCACCGGAAAGCTCCAGGTACCGAGGCTCCTGCACCTTC  
GCATCCAGACCGAGGACACTCTTGGGACGGCGCAGCATCCATTCCGATACCCGTTGC  
GCGAGTAGCACTCGGGCCTCTTGACTGCCGGCGAACTCCTTTGCGAAGTCGCCGCGC  
TCCATGTCGCCGAGCGGGTGCCCCGACAGACGCAGCAGCGTGTGCAGTTCACAAT  
CCGGTTCAGGATCGGCGTAGCCGTCAGCAGATATCGGCGCGGCACCTTCTGAGCGA  
CCAGGAAGGCATTGAGCGTGCGCGATGCCGTAGGTTGGATGATGCTGTGGGCTTCAT  
CGAAAACACGGCCCCGAGGCGCAATGACGCCATCGGTGATGGCCTGGACGATGACG  
CCAAGCTTCTCGTAAGACGCAATCAGCCAGTCCGGCTCCGCATGGATGCCCTCTTTG  
TCCAGGATGGCAATCTGCGCGTTCGGATCCACGGCCAGGATCTCGCGCGACCAGTTG  
ATCAACAGGCTGGCCGGCGCGACCAACAGGCGGCAGCCGGTCCCAGGCATCAGGTG  
CAGCGCGGCCGCCGACTGCCGCGACTTGCCGAGGCCTGGTTCGTCCCCAAGCAGTG

CGCTATTCGCGGCCAGCAGATGCAGGATGCCGGCCGGCTGGTGATCCAGTAGCGAC  
ATCGAGGCGGTTCGCTTCAGCGAACCCTGCGGATCAACATTCTGTGCTGCAGCGGC  
TGCAGGACGATCGCCAGGCGGCCTTCCTCGCCCTCCTCATCGCCGCCCTGCCCCCGC  
TTCACCTCAGCACCGGACACGTTGATGGTGGGGCGCTCTTCCGCCTCGTAGCCACCA  
CTGGTGCATCGATGCGAATCTCGCCTTCATGGATGAAGACGTGGCCGCGAAGCAC  
GCCTGCTTTGGCGGCAAGGTCGCCTAACAGCTGTTCCAGGCTCCGCTGGACGTACCA  
GCCCTCCTTGCTGCTCAGAAGCCGGCCGCCAGGGCGCGTAGACAGGACACGACCA  
GGGAGTCGTACCTCGTGTCGACCACATAACCCGCCGTCAGCAGCGACCGGATAGATC  
TTGACATCGAGGTCCGGCGCGAACGCATCGACTTCCGGCGACAGCAGCGCTGCAGC  
GAGCTGCGCCTGCGCTGCAGAGCGATCGTACGCGAGCCGCAAACCACCCTTGTGCC  
CGAGCTCGTCCAGCAGGGGCCCAATATTGTCGTCCGCCGGCAGTACCCACGTCCGCG  
AGCTGGCCGACCAGCTGGCTCCGCGCTCTTTAAGCGTGGCTACGATATCCGGGTGAA  
AGCCGGTCGAGAGACCCACGCGGAATCCATCGGATCGGATCCCGGCAAGCAACGGG  
CGGGCCTGCCTCCGGATCTTGGCCAGGGCACCCATCGCTATACTCCCGGCCGCGGCG  
AGTCTTCGACTTCCTCGCCGCCAGCCACGCACACCAGTTCGTGCGCGGCTGGCGGCG  
TGAGCTCCGCCAGCCTCAGGGTCCAGTACGCATCCACGGCGCCGGCGCCGTGGTCA  
AAGTTGACCTGGCCATACTGGCTCGTGATGCCGGACAGATCCAAATAGTCTTCGAGA  
CACTCTCGCAGGGGCCTGGCCAGCGCCATCAAGGCGGCATCGGTAGTGCCCTCGCC  
GGCGCTGCCAAGGCGCCACTTGCGGACAGCCTCCCGTGCGGTCTGCAGCGCGTACTC  
ACCGTACTGCTGACCAATGAACGGCGCCATGGAATAGAGCTCCAAAGCAAATGCGA  
GCCGCGAGCCCACGTACGGGCAGAAAGTCCCCGAGACGCCGCCTCAATGCTCACC  
TCCTGCAGCAGCTGCTGGGCCCCCTTCATAGGCTGCCGCTGCTTTGAGGTGGGCATCA  
GGCGTGTGGCTGTCGGCCTCGCCATTGTCGTGTAGGTTCGTGTAGGTCTCGGCGAGG  
GAGAGCGCATATGGCAGTACGCTGGCCAACGCAGCGCTAAGCGCGTACACGCGCGC  
CTGATGCCGGTCAACGGGGTCGGTGTTCGGAGTCATTGCTTCATTCCCATTGATGCC  
GCATCGGCCGCCGCGGGCATTGTTTCCCGAGCCACCAACTGCAGGTCTTCGCGCGTA  
AGGTTGTGCCGCGCGCAGAAGTGATCAACCGACCAGGCGATCCTGCTTGCAAGGCG  
GCGTCCTACCACGGCTTCACCGTCTTCGTTGCGGAGGTCCACCAGGTTCATCCTCAAT  
CGAGGTGCTCGCAGGATCGAAGTCGAAGCCGCGCTCTCGGAGCGCGACCAACCACG  
CCTCAGGCTTGAGATCAAACGCAGGTATCGCCCAGGGCTGCGGGTCCACATTCAGC  
GCCTCGTAGAAGCTGCGACTCAGCGGCGGCTCCCCCTGGGCCCCCTCCCATCACCCAC  
GGCCGAAGCGTCAAGCCGAATTCACGGACCGTGATCAGCTGCTCATGCAGAAAGTC  
GAACATCTTGCGGTCTTCGCGATCAACCAGGTTACCATCAGTGAGCTAACTGCCTG  
CGGTAGAAGCTCTCTCACCTGCCAGAACGCCGTGGACGAACCTCGACTCCAGTTCGTC  
CACGCACCGCCCCTGGCGCGGCCGCGCCAGGGGCTGCTGCGTGGGCGCGCCTTCTG  
CATTCACCGTTACGGGGACGGCTCGATTGCACCGCAGCCACGCCCGGGCACAAATCTT  
CGATCGTTTGAATTGCCATACCCGCTGATCAGGGTCCACGCTGCGCGCTGTTGCAC  
GCATGAGAGCTTTCTCTGCGCGGTGGAGGCTGTCACACAATTCACCGACGAGCTCCG  
CAGAGCGGTAGTCGAGCACATCGATGTCCACGTCATAGGCAGAATCCGCACCACT  
GACGTCAGTAAGACCGTGTAATAGGCAGCATGACCTTGCTCAGGCGCGGATGGGTC

CACCTCGCTCACCAGGTCCGACCTCCAGAGATCCCGGTAGCAGACGTCCCGGAAAG  
GAATGACCTGGTTTTCCCTCGCCCAATAGGACCACGGGGAGGATCACATTTCCCTCAT  
ACGGCAAGCCACGAATCATCATGGCGACATCCCCGGCACGTGCTCGCGCCACTCGT  
CGTCGCTCATCTGCTCCAGCCCCGTTGCGGTTTTCCTTCATTGGAAGCGCAACGAGCG  
ACTCGCCATCCATGTCGAACGACAGCTCCATCACTACGCCGTTCTGATCGCGCGCGT  
AGACCGTACCGTTCGTGTCCAGGAGGAACTGGAAGTATCGTCGTCGATGGATGCA  
CCGACGATCTCTACTTCATCCAGCGAGGCCCCCTTCGGATGCGACGGTAAATTCCTGA  
ATCATCGGCGAGGCTTCAGTGTCCGCAGGCGAAACTGCATCTCTGTGGTGATTTCGAT  
GCGTAGGCGAACGCCGCGTTGACATAGCCGTCCACCAAATCCTCTCTCTCCTCAAGC  
CACTGTTTTACGCCCCGGTGGCACCTCGTGCCCGTTCCGCTCGCCTTCGTTCAACCACC  
CTGTATCGCGGACACAGAAGAAGGTACCGCTTGTGCCGTTCCGGTCCACAGACCATTG  
CCGGCGTACCAGCGCCCCGGTCTGTCAGGATGCGCCTCGGTGTAATCAAGTTCGACC  
GTATAGCGTGGATCCTTTGTATAGGTCAGTGTTTGCTTCTTCATGGGTCTGCTCCTTA  
TGTAAGTCTGCTCAGAATCTGAAGCCGCGGTGAGCCTCATCTATATCGGCTTCCGGTGTG  
CTACCGACTCGACTTTTCAGATGTACCGCCAAGCTCTCGCCGATGGCGGGCTGCGTGT  
CCAAATAGGATCGATTGACCAAGGGCCTCATGCGCGAGCGTGGTGCTCGCTCCGAC  
AACCAACTTCTCTGGGATGCCTTTACGCGCGCATGCTCCACCGGGCTCAACAATCG  
CTGCAATCCGTCCCTACGAATTAGAAACGCTTCCGTAATTCGAGCTTTGGCGTAGCC  
GCGCCCAATCGTCCCAACCTCCGTCGCATCGGGGGTAACCAGCTGGCGCTTGAATCC  
TTTGCCTGCCGCCGCGTCGCGGGCGTTTTTTTCGGCCAAATACTCGTACGCCCGACA  
TCGGCTTTTCATCACTGTGTGCGCTGGCGTCCAAGGCATCGCCGAGCGTCTCGTACAG  
TCGTGGTTGGGCTGGGAGGTTTCGCCATGGAGTAGCTTTTCGGCGAGGCCCTTGCTGAT  
CGCGCAGAACCACCAGCGCTTGCATTCTCGATCGTTCCCGCAACCTTGACATCGAG  
AACCACGTCCGACATCACATATCCCTGTGCATCAAGGTATGCACGCACAAGATCGTA  
GCTGGCGCTATCGCGCGCCTGCTCGACGTTCTCCGAGACGACGATAGACGGATTGAC  
CACCTCCAGGATCCGCAGCAGTCCATAGACCGCCAGCCCATCGGTGGGATGCTGCTC  
GGCGTTGTCCAACCTCCGCTTCGCCTTTCCCGACAGGCTGTGGCCCGTGCACGGCAA  
CGAGACCTGCAACACGTCAACGTGTGAAAGCGCCTGCGCATCGATCTCCTCCAGCG  
ATGCTTCATAGAGCCGGGTGTGCGGAGCCGATCGCGTCGTTGTTCTGCGATGCCAGTT  
CGAGGTACGCGCCCTCGCGATCTACAATCCAGTCCACGCGTGTACGCAGACCCTCGC  
GCTCCAGACCTTCCTTCAGCGCCAACGTGAGACACCCGCCCCCGCGCACAGCGTCG  
CTTCGGTACAGGTACCCATCGCGGACGTGCTCCCGCGTGCTCTTCTCGCGTTGTTTGA  
GGGCGAGGTGCGCAGGGTGGAGATCGAAAACGATCTGCCCTGCCGCTAGCGTGGCG  
CGTACGCGCGCGCCCTCGCCCAGGACGTGCGAAAGCGCGCCACCCGTGACGTCTAC  
AATCGGCGTCTGCCTGATCTCCCCGCCTACAACTGCCTTTTCCCGCTTCGATACGGTG  
CGATCACCTGCTGCATCTACTTTGAGTCGAACCTGGCGGTTGACAAGATCAAGTTCC  
ACCCGGAACCTTTGATCCCGGCAAAAACCCGCACTTGCCCAGGCGAAGACCTTCCAG  
CCACAGCCGTGGTTGGCCCCGGCTGTGTCCGAGCTTTGTGTAGCTCACCTGCACGTG  
AGCCGGGAATCCGGCTTGACCATTGCGCGGTAAAGCGCTGGCGACCTGTGTTGCCG  
CCGCCAGCGCGGTTTGAGCCGGAAGCTTCCTCAGCATGCTCGCACCTCAGGCTGCAT

CTGGCAGACCTCACCAGCGCCGCGGCCCGAGGCTGGCTCGCGACCACGGACCAGT  
AGCAGTCGATGCCAAAACCGAACACAGTTTCAAAGTTCCGCGTCGGCTCCTGCAGC  
CCGTGCCGACGGAGCAACTCGGCGCACTCATAAATTGCCTCGTGAGCGCCCTCGCCC  
GCCATCTGCTGCCGGTAGTACACCAGCCAGCACCCGACCTCAAAATGATCCTGAGC  
GGCCCGGAACTCCTTATACGCGTCCCGAGGTTTCGAGGATCTTGCTGGCCCGCGCGGC  
CGTCTCAACGACCGCTTGGGTCGTATTGCAATTCCTGCGCAGATCATCCCGCGTCGA  
GGCGGATATGGGCGCCCGCACCATACGTCGGACGCTCATGGCTTGAAAGCCCCTTC  
ATACTCATCCTCTGGCTCTGCCGCCGCCGAAGCCTGCAGTGTGGCCACGTGTTGATT  
GATGGCCATGCTGCTCGCAATAAGCGTTTTTGCCACCAAGAGGGTTTTCGGCATACGA  
CTTCCCGCTGGTATGCGCTGCCCCGTCAGCAAATACGGAGCGGTGCTGCCCTTCAAC  
CATCGGGCCCGGTGCCAAGGAAGATGGTGGCTCGCGGCTCGTCCAGGAAGACGCGTA  
CTTCGCCGTGGGATTGGTCTGCGCGCTTCCCGTGATGTTACGCGGCTCCAGGAACG  
AACTGACGCTGTTGCCAGGCCCCCCCCATGTACCAGGTCAGCTCGTGGCGTTTCGTACA  
GCTTCCACTGATGGCCAGCGGGCGCCGGCAGATAGGCCATCATCTCTTTGAGGTGCC  
CCACCACCAACTCGGCCACGCCGCGACGGTCGGTCTCCCATTTGCGTGCCTTCGGACG  
CCGGCAGCTGCGAGTGGCGCGATCGCGCCCACAGCGGACTCTCGGCAAGTGATCCA  
CCCAGCAGGCCGGCCGCGGTGCCGTGCAACTTGAGCCGGTCGCCCAGGTCGACGGC  
TTCAGCCTTTGGGGCGGCCGACTGAAGCCGAACCAGGGCTGCAGCTGCTGCATCCA  
GCTGCGTGGTCAATGACACCGCCAGCTGGTGGTTACCAGCATCAACGGCACGGTCA  
CGCGTGACCTGGCCCGTTTCGCGCAAAATCACTCAACGCTGCCGCCATAACCTGGCGC  
TCGGCTTCGGAGACGTACAGCGGCTGAAGGTTGTTGTCCATATGCGCCTCAGCCCGC  
CATCGCCGGACGGGATGCAACCGTCAAGGCATCTTGGAGCGCGGTCTCGGGCTGAT  
CCCCGCTGCCGATGGCCTCCAGCAACTCCGGCAGCTTGTCGTACATCTCGATATCGC  
GGTGCTGATGGCCCTCCAGCTTCAGCATCTGGTGACGTCCGCCACCCCAGTCAATCT  
CCAGCTCTGCCCTGGCCGTATGCTGCTCCGGCTCCCTCGGGGTCCAGCCGCTGTCTG  
GGTAGTCCCGATAGCCTTCGCTGGCCGGGCAGTACGACGTCGTGCGTTACACCCCAT  
CTACGCTCACCAGCGTGTAAGTGGATCGACGGCTTTTTTACAAACGTTTCATGGTGGCAA  
AATCCTGTCAGGCTGCGGCTAGATGCCCACCCCGGCGTGCCGCGCACGGCAATTTTG  
CGCCACTTTCATTGGTAAATCTACGGCTTTTTTATGTGCGCCATATGTGCGCGCCGCCG  
CCCTCCAGCGACTTCGGTGGCAGAACAGTCCGGGGACCGGTTACGACAACCTCGCC  
ACCTCTGCACCTCCCGCACGTCGCGATGAGGCGAGCGCCCGCTGAGCTCCCATTCGC  
AATCCGTACGCCACGCGCGTGCTCCATGTCCAATAATCACGCACTGATCCAACATTT  
CAATCACCCCGCACATCACTTGCGCTCACTACCGCCGGTCTCGCCCCCATAGCTGGG  
GAGATTTGCCATCAAGTACCGCCTTGCGCCGGCGCAATAGCGAATGTTATCCGTGAG  
CCAGCCCCTAGCATGCGAACCTACGTATCCAGCTGGCGCGCTGCACCAGACTCATCC  
TGACGACGCTCTTCCGCATCCGACCCCGAAGTGAGCAACCCGTCATCACCGCAGCTC  
GCCGCCATCCAACGCATCCGCCTGGCGCGGTTGTCTCCCGCTCGCGTTCCAACAAG  
GTGGCCAAGCGATTGGCGCGGTTATTCGCCTCCCGGATCTTGTTGTTTCGCCGCCTCC  
ATGTTCCGTACCCGCGCAACCAGTCGACCCAGCATCGCCAGTTTCGACCTCAACATTA  
CGCTCAGGGAAGGCGTAACGATCCAATGCGGTTCGCATAGGCATCGTCGCCCGGCAC

CCGGGTGTAGAACCGTAGCGCAGCCGCGGGCGCCGGCAACCGCTTTCACAGTGCCCT  
TATCCGACACCCACAAGAGGCCCCAGCGCTCCGGCACTTCGTCGACATTGATGAGA  
CCTTCCGGGCACATGAAATAGCGCCATTTGCCGGCACCTAGCGCGGGTTTAATTCGA  
TGCTCTTTGCGCGCGTCGGCCAGAAAATCGGCGCGTGACACCTTGACTTCGATCAGC  
ACGCTACCGTCCTGGAAGCCCCGCGTGCCGCCATCCGATAGCATCTGGCTGTTCCCC  
CGCCAGCCGGGATAGCATTCCGTCTGCGCCACCGAACAGCCGTGTCCGCCAGCAGA  
ATTGTGCTTTCTCAGCCACCGAACGGCGACTGCGCACAACGCATTGTGCGTCGCGGC  
GGGCGAGCGCCCTTCTTTGCGATCCGATTCGCCTTCTTCCGTACCCGAATCTCTCCT  
GCGCCGACGAGTCGGCTAGTCTTTTGACACCATCACCATCACATCAGCTTTTCACTG  
ACACCCGAGTGTCTCTCCGGGTGTCCAACGAAGCCGGAGCAGTGGTCCGAATCGGT  
GTACTTGCGAGCTCCCCAAGCAGAAATCCCTGGCCGTAGCGGATTCCCATGTGATG  
CACGCTTGCCGCTTCTCTTCGGTATCGATGTTCTCCGCGACAACAATGAACCCCTGC  
CCTTCCGCCAGCGCTAACACGCGGGAGATGTCCCGGCTGTACTCACTACGACGCCCC  
AGCATCACGCCGGCAAGCTTCACGATGTCCGGGTGAACCGAACAATGTCTTCGAAT  
GAGAAGCAGCCATCCCCGAAGTCGTCAAAGGCCACTTTGGCGCCCCGAGCTCTCAC  
GCCTGCGATGAAAGAATGCACCACCCTGGGATTTCGTGACCGCAATCGACTCGGTGA  
TCTCCACGACCAACCGATCAGCCTCCTGAAGATGCATGAACACTGCCGCCACCAGA  
GGACCGCAGTTGCGCTCAATTGTGCTCACCGATGCGTTACACCTATCCGGATACCC  
GGCGAGCGAGCGAGGAATTCAGTCGCTGGTCGAGCATGGCGAGATCGACCAGCTC  
AATGAAGCCATAGGTCTCGGCGAAGCTGAGCAGCTCGCCGTGACTACGCTTGCTGGT  
GCTTCGCGCGAGCGCCTCGAAATAGAGCGCTTCCCCGTTTCAGGAGATCGATAACCG  
GCTGGAACACCGGAATACTACAGCCAGCGCCATACTCGGCTGCCGCTTCATTTCGCGTGC  
CCCTGGTTCGAACACCCAATCGGGCGCGCATGGCCTCGAATGCCTCCCGGCGACCGA  
AGTTACGGGCATGCGCGAGCATTGCTCCGAGCAGCTCGCCAAGCTCGTGCGCGCCA  
GCACCTGCAGCGACCGATGCCACGACATGGCATTGGTCATCCATTATTTCCACACGT  
TGACCGCGACACGAAAGCTTCAACCCCAGTTCTGAAAGTGGGACGCTGTCAAGCAG  
CTGCTGAATCAGCGGGCGCCGTGTGTTTGATACCGGGAAGTTGCTGCAGCCATAGA  
AAGGTCCTCGTGACGAATTTGCAACTGCATCGTTCCCTTGGCGCACTTCTCGCAGG  
GTGCGCCGCTCCCGCCGTTTCGCCTTCTTGCCGCCCTTTGACGCAGTCTTCCGCTTCCC  
CGCTGTCTTCGTGGGGGGCACACGACGTGGGCCCAGGTCGGGAAGCACGATCCGCA  
GCTGACGGATCTCTGCCAACATCGCGTTGATCTGCCTAGCCTGGAACGCCATGAACT  
GTTCCAAGGTGATTTCCCCGGCTTCAATCTTCGCAAAGGCCATGTCCACACGGCAG  
TGGCATCTGGAACCGTCAGCGACCTGGGAAGCGCTTCGTAGAGTGCAAGACCAGCA  
GCCGTTGGCGCGAAGAAGTTCGCCTTCTTCTTGCCGGCGATGTGCTCCACCACGCCA  
ATCTCTATCAGCTTGGGCGCGAAGGTATGTCGCGTGGCAGGCGTGCCGATTCCGCAG  
CCTTGGGCCTGGTCATCAGCCCCGGCCTCGCTCTTCTTCAGCATTGCCACAAAGTGC  
GCCTTCACCTGCGGTGTGGTCACGTATTTGTGAATGTTGACCATGGCTTCGAGCAAG  
GTATCGTCAGTGAACCGCGAAGGCGGCTCGGTCTTCTTGTCTCCCGGTCGAGCCCC  
TCGCACCGCGCTGCTTCGTCTGCGCATAGCGGGCAGATTCACATCGTCGCCCTTG  
TCCTGCGGCGCAGCATCGTCATCAGCAGCCTGCTCCGCCTTCCCATAACAACCTCCTC

CACCCTGGCTTCAACGTCGTGCGACCACTGGCAATGAAGTCATGATTCGCGACTTCA  
GCACGCACGCTGACTTTTCGGTACGTGTGTGGAGGCATGAACTGCGCCAGGTACCGG  
CGGGCAATATCCTCATAGATGAGCCGCTCTTCGCGGGAAAGTGCCTCTAAATTCGCT  
GCTTTGGGCGTCGGCACGATTCGGTGGTGGCTGTGACCCTTTTGTCTGTCAAACGCC  
CTGCTCTTTCGACCGATATCCAACCTGGCTTAGCTGCGCCGGAAGGTCAGTTCCGCGG  
AAGCCTTCGCGCACTGCCTGGACAATCTCAGCAGCCTCCGCATGCTGGCTCATGGGG  
AGATAAGCGCAATCTGTACGCGGGTACGTGACCAGCTTGGAATCGTAGAGCCCCTG  
GACAACCTTTAGGGTTTGTCTCCAGACCCATGCCATAGCGGCGCGACGCTAGGCGTTG  
CAGTTCGTCAAGCGAGAATGGAAGCGGTGCATTTTCGTTCTTCTGCTCGTCACGGTA  
TTCGGCAATCCGTCCGGTCTTGCCTGCAACTTGCTGGTGCACCATAGCGGCAACTGC  
AGCGTCAAGCAGCCGCCCGTTCTCATCGATACCCGGTTGCCCGTTGCGCGGGGCGCCA  
CTTGGCGCGGAACCTTACCTGCCTGCACAGCGATCATGGCAGTGAGCACCAGGTAGT  
CCACGGGGCTTGAAGTTACGGATTTCCAGCTCCCGCGACGCAATCAGCCCCAGCACA  
GGCGTCTGAACACGTCTATAGATACATGCCCGGTGAGCCCGCCTCACGTGCCTGA  
AGCGTCACGCATCGGCTGTAGTTCATCCCTACCAGCCAGTCCGCGCGGCCTCGTGCA  
ATGGCTGCATCGCGCATCCGCGCGAAGTCACGATTGTCCCTCTCATCTGCAAGAACG  
CGCTGGACGGACACATCATCAATGGCCTTCGGCAAAACCCGCTTCACTGGTACCAG  
GCAGCGGAGATCCTCCAGGACTTCGTCAACCAAGAGTTGGCCTTCGCGGTTCGATATC  
GCCCGCGTGCACGACCACCGTTGCACGTGTCAGGAGCTTACGTACGGCGTTCGATCAT  
CTCCGCCTTGTCGCTCACCGGTACAAGCCGCCACTCGTCGTTGGCTGGGAGCAGCGG  
CAGGTGGTCAAAGAGCCAGGGGAAGCGCCCATAGCCCCACGTTTGGCCTCCGGAT  
AGGTGCGCTCGATGTAGTAGTCCGGCTCCGCCAGCTGGTACACGTGCCACGCAGCC  
AGCACACCGCCAGTTGGAACCTTCGATGTGGCTTCCCGATCTACCGACCGCCGGCG  
CGCTCTTCGCGAGGTGGCCAGCCAGCGCTTTGCCAACCGAGGGCTTCTCGGCAACGT  
ACAGTTTGAACTCAGGCACAGGGGTCTCCACCACTTTTCGTTACCAAATCCTGCAGGA  
CGAAGCGCGAAAGGGTTTTGTAGAATCACGGTGTGTTGGGGAACGGTCCCTGTAGCCG  
AGGACTCGAACGATGACGACGACAGGCCGACCAAGGCCAAGCCGGTCAAGAGCG  
CCGCTGTCCGAAAGGGCTCTGCGACGACAACGACTGCCCGTAAGAGCGCGCCCGCG  
AAAGCGAGCACGCCAGCGAAGACGCCACCACCGGCGCAGGAAGTCGCAGGCAAAT  
CGGTTCGTGAGCCCTCGCAGCGCTGAGATGAAGGAAGCTCGGCGCTTCGCGCTTACC  
CATAATTTTGGTCTCAGCAGCCGCATCCGCGATTTGCTGGACTCCAAACGCCCCGTG  
CTGCAGATCTTCATCGACGAGAACCTGCCCCCTCGCCAAGGTTTCAGGAGTTCATCCAG  
CGCAAATACGGCCCAGATCCCGGCCAAAGCGCTTAGCACTTACCTGGAAGCGAA  
CTTCAAAGCGAAGAAGTGAGCACCTGGGCATGCGGCCTCACCGGATCAACCGGAAC  
GAAGATGCCTGCATCAGCGCCGACGCAACGAGGCAGCAATCCGCCGCACGCTTTC  
AGACTCGACCGGCTCGCCACTTTCCGCCTGCAAAGTGACGCTCAGAAGCGGAAGCG  
TTCGCTGCTGACCGGCAACCAGGCGCCACTCGCTGTGGCTCACCTGGATCGTCGCTG  
GCGATGCCGGATCCGCCTCCTGATATTCGAGCGTCAGATCTTCGCCTTACCGCCGT  
CGTCGGCCACATGGGAGAACCGCACGCTAGGGGCACTCGGTGCCGAACCTCCTCCGGC  
ACCGGCAAGGCTTCACAGATTTGCGCCCAGATACTCATTTTCGGCTCCTATCCTGCCA

GGGAGAACGCGGGATGGCCCGCGTCACAATCGTTAGTATATCCATATTTGCCGAGG  
ATGAAATCGTTAATGGCGGCGCGGACCTCAGAAGGTCCATACATTGATACACCAAT  
GGAAGTGAGGATCCTGAGGACTTCAGGAAGCTTGTCCGGGGAAAACCGGGCCACCA  
TGTAGGCGCGGGTTCCGGCGAACTCCCCAGTGAGCTCACACAACGGCTCGCTGCTG  
AAGTACTTCCCGCCCCAGGCCTTCGTGCCTGGCACCGTCATTTTCAACAGTGGGCCA  
TCCCGCTCGATGGCCGCGTGCCGGTCGAGCTCATACTCCCCCTGGCTGTTTCGTGAC  
AGTTGGATATCCGGATGCTCCTGGATCAACCATGAAGCTACCGAAGGGGTCTCGATA  
CGCACACGCAGCGAATTGATATGGTCGGGCCTGATGCCGGCGTTGAGCATCACGCC  
GCGATGCCGCGCGCCATGCTGATCGGTGTACATGACGCAGCTGCCGATCTTATTGGC  
CGCTGCCATCTGAGCCGCCTTGAACAGATTGCCATCCAGGACGCACCGCGTCCGGGT  
TATCAGCCCTGCAGGGGGCCGCGTCGAAAGCCTCCCAAAGACCAGACGCGGGCGAGC  
CGACCGGGCGCGTCGAGAATGCGGGGTCTTCCATAAGCGCATACAAGCTGCGCTCC  
ACCAGCTGGGACTGACCAGGCACGGCAATGAGGACCGTGTATTGCCCGGGGTATG  
CATCTTCTTCGTGTTTCGGCAACGTGATGTCCACCATCACGCCTTCCGTTCTGGCG  
TTTTTCGGCCCCGGAGAACGTCGCCAGCGCGCCAGGCGCACATCGCGGCAGTGTTTCG  
CGCAATGAAGTCAATGCGATCGCGGAGGCGCTTTACTGCATTAAGTTCTGTGGCGGC  
CAATAGCTCGTCTACGCTCTCCTTGCGGCCTTGAGCGCCCTCCTGCAGCAGCTTGGG  
CGCCAATCGCTCCAGAGAGCCCCGCCATGCGGGTCAGGACGCGCGCCAGCGGGTGTC  
CATAAGCTGAGTCAAAGCGCGCCTCCGTGCGATCGCAACGGGCCTTGACATCCATC  
GGACGCAGCGGCAGCACTTCTTCGGTGTAGCTGATGGTTTTGAGGAAGACAGGTTGC  
TCAAACACCGAACCAGGACTGAGCGTTACCACCCTCAAAAACGATTCGAGAATCCTC  
GGTGGCGCGAAGATCCAGATCCTTTGATTTGAACGGGTTCAGGCCCTTCTCATCCAG  
TTCCTTGATGATCCGGGTGTACTCGCTGGTGATCTCCTCGTAGATCGCCTCCTGCTCG  
GCATTACGAAGCATCACCAGCCTGCTGGTGAGCTTGGTGATGAAATAGGCCTCTTGC  
TGGAACCCCGAATCGTCGCCTTCGATATCAAGATCAATGTTCGAGTCGATGCGCGATC  
AACGGATTGCTTTCGAGATACCGTCTTGCCACCTGGTCGCCGACCACGTTGATGAAG  
TCGGGCACGTTTCTGTCCAGCGCGGCCGAATCCTGATTGGCCGTGGTGTGGCCGAG  
AGCTTTCGCATCTTCGCGTTCTGCATCGCGATGGGGCGTGCCTCGCCAATCAGCCCC  
GAGGAGAGCGTCTCAACTTCGGGGGCTGCTGACCTGGCCTTTGCGGTTACCCGTCCG  
AAGAACTGGACCCGCACATTCACATCGGCAGCCGACTGCAGCTCGATCAACACCCG  
TTGCCTCTGGTCGTCGAACTTCTCGCTGGCGTGCAATGAGATGCCGGTCGAGCCAGC  
CCGCGTGAGCAGGAGCGCGTCGGTTTCTCCCATGTTGAACTCGCGCACGATCCGTGC  
CTTGGGGCGCTCAGGCCTGACAGTGGCCACGGAAGTTAGCTTCGCCGGTAACACCATC  
TGTGCGTCGCTCTATGCGCAAACTGCGCCCACTAAGCTCGTCCGCGGCATACCCTGC  
CTCTTCAAGACGCGTTCGGATTTGATCCAACGGCGAGGCGGGAAGATCGGGAACT  
CTCCGATCAAGCTCTCGATGCTGGCGATGAGCTTAAGCGTTTCCTTGCTGGTTACGTC  
CCGCCGAACTACCTCGCCATAGCCAGTTGTTTCACTGTAGTAGCGCAACTTGTCCAA  
CATCCTCCGGAGCACATCGGCAAACACGATGTCTTGGCCAAGGTCTACCCCGGCCGC  
AAGATCCTGCTCGGCGTTGACAGCGGCGGCGGCGTTCGCCAGCTCTTCGTCCAGGTC  
CTCGAAGCCATCGGCCCCGGCTGTTGGTGATTACGTCCCTAAGCAGGGACTCCATGGT

GTTCTCCAATACGATTACTGGTTTCTTGCCAGCCTCAAGGGCCGCAATCGCGCGGTC  
AATCGCCAGCTCCGTCTTGATCGCCATCTGGAAGTGCCGGTAGATCGAGAACAGGC  
GGGATCCGAAGTTCATCGATATCGCGCCCATGCGCGCGCCCTTGCGCTCTTGCTCAG  
GAATCAGCTCACGCAGCTTTTCGATTTCTTTGTTGCGCTCGCTGACCATCACATTGAT  
GTCACCGGAAACGAAGTTCATCAGCTCAAGGATTTTCGGCCAACTTGTCGATAGTTC  
GATGTTGCGCTCCAGGCGGGTGCTGTCAGCCACCGTATCGAACGTAAGCGCGCTCA  
GGTCATGCTCTCGGCGGATGAATACTCCGTGCGGGGCCATCATTCCTGACAGCACCT  
CCTGGAGAACTTCACCGCCTGTTTGCAAGGTCTCCGGGAGACCGGCAACATCAACA  
GATTGCGGGAAGAGCGCGCTATAGATCAGCACGTTCTTTGCTCCCTTCATCGAGGTC  
GCAGAGCTATAGGTCACCGAGCGGCTTGCCCTCGATCGCGGGCCGCGATATTTGCCCCG  
GTGTTGAGTCGCCCCGCCGATTGTGAGCCTCATCCAGCAGCAGCTGCGAGTCACGT  
GCTGCACCGGAAATCCATCTGGCCTTTGCCGATGTGTTGGCATTCCGATTGAACTGG  
CTGTAGGTGGCCAACACCAGGTTGAACTCCGATGGAATCGCATCTTCCGCAAGTGCC  
CGCTGGAGGGTAGACCTCGGTGTCGCCGGCACCAGCGTCTCGCCCGACTTCGGGTGCG  
TACACAGGAACGCCGTCATTGACGATCATCGGTTTGAACAGGTCGGCAGATCCAAT  
ATCCTGCACGTCTCGCCAGAAATCGGTGAACAATGTCGGCGTCTCGGTGAGGAAGA  
CCGTCTGCCTGCCGCGGAGAACTGCATAGCGAGCCATGGCAGCCATGACACGCCCC  
TTGCCGAGGCCGGTCTGGTCGCCCTCCAGGCAGCCTCGCCCATACTGCTCTGCGTAG  
ATACAAAGCGCGACCGCGTCAACCTGCTCGGGCGACAGGTACTCGCGCTCACGCAT  
CTCGTCTACTCGCCAATGCAGATTCTTCGCCACGAACTCGTCGATGTCGCCATGTTC  
GTCAACGATGCGCTCCAGGGCCGAACGGGTGGCAGTTTGGAGATTCCGTGGAATCA  
TCGCCGACGCCTCGCCGACGCGTGAAGTGGGCGATGTATGGCGATTGATAGCTGTTCT  
CGTCGACAGCTGATACGTTTCGCCGCACTGTCCTCCTCGCCGCCCGGCGGCAGTGAT  
CGGCATGGTCGGTGGATGCCTGCGCGGTATGTACAGCAGCTTCTATGCTGTCTGCCG  
GCAGATCCAGATCCATCGCGTCGAACATAGGCTCAGGCGTTGCCTCGCTCAGCACTA  
TCCGGTTGGACGACACATCCAGGTGTGAGGCGTCGAACGCCGGGGTTCGACTCAACA  
GCTACCTGCTTCAGCAGCAGCGCCGGGGCCGGTGCCTGCGCGTAACGCGCCCCGCAT  
GTTTCGCGCCCACGCGATGACGGACTCGTGGTCCTGCAGGACGTCCAACCTTTCAGG  
GATCGGGCTGGCGCTTGACCCCTTGGCGCCAATGACAACAGCCGCACGGGGAAGC  
CGGCGCCTTGCTTTGCGTACAGTCCGCCATCGACCTCCACCACATCGACCTGGTAGT  
GATCGGCCAACCAGTTGAACAAGTAGCGCGACCCTCCCCTGACCTCGCCCCGCTTAC  
TGTCGAGTGCGTTGTCGCCGCCAACGATGTAAACAGCTAGCCCATCATCTCGTCGCA  
GGCGCAGCGAGTTGACCAGAACCAGATGATCGAGCCTTCCCACCTTCAGCCTGTGCG  
ACCATGACAGGTCGCGCAAGCCCCGCCGAAAGGTGGATTGCACAGCACGGTGTGCAA  
TTTACCATCGGTTGCCGGCGACGGCGGGCGGATCCGCCAGGAAGTCGCCGACAGATA  
CCACGATGTCGGGACGGTCGCGACGGACCGATGCTACGCGAGCGGGATCGATGTGCG  
ACCGAATGAATGGTCGCGTCACGGATCAGCGACACCAGCGACGCGTTGCCGATAGT  
GGGCTCCAGCAGGAGCTTCCCTCGCTGGTCAACCGCAATGTGTTGGACGGCCACTGC  
CAACGGCAAAGTCGTGGAGTACTGCTGATTTATGATCGAGCTGGTGGTTCTTGCCTT  
GAAGGGGGGCTGACCTTCTTCGAGTCTCCTGGCGAGCTCGAAAGCCGGCACATCGG

CCGCGCCATGGGCGCCAAGCGTGCGCACCAAGGCGGCCTCGACGGCTTCCTGCCAA  
ACCCGGAGCAACGAGGATGTCTCCACCTGCTCCTCGGCAGCGTCGTTGACCACGGCT  
GCCCATCGCCGTAGGTCTGCGTACCGCATTGGCTTGCCCCGCCGCATTTGACCACG  
AACCCATCAGCGCAGCCCCGAAGTTCAACCGCATCCGGCGCCCGCAGAAAGCGCGA  
GGCGCCGGCAGCACCTGCAAGCTCGCTCTCTCTGCCCACCACCTCGTGGTCGCGGCG  
TGCAAATCTCCCAAGCTCGCTCTCGAAAACGGTTTCCCCAGCCGAGTTGCAGCCAAG  
CTCCCTGATGGCGCCGATGATGTTGTTGGCCTGCAGGTCGCCACTGTTGACCGGGTC  
GCCGGCGTTTCGCTCTGCGCGGTAGCGCCCTGACTACACGGCCAACCGGAACCTCCAC  
AGGCTCGGCGCCAGGGAACGCGCGGGCGAAGTTCGCCGAGCGTGAACCTAAGCTCGT  
CGCGCAGCACCAATCCACGTGGAGATTGGTAGAAGCCGAGCTGCGCCAGAGCGCTG  
AGCGTAGACGGGGCGACTTGGTCGCCGCCGAGGAGCACAAGCTTGCGCGTGCCGGA  
CGGGAACCTGGGCACCTACCAGACGCACCCGGGGATTGGCCGGGTCCAAGCGCACCC  
AGCGAACGAGCGTATTTGCATCCATCGAAGATCTCATGAGGTTCTGGAGCTCAATAC  
GACTCAGCCGCCCGGAGGCGGCTGAGTCGGCTACTGCAACGAGCGATTACGGAGCC  
GGGCTGTGCGCCGGCTCATCTTCCGGTTCCCGCGCCACTGCCGCCTGGGCCTTGGA  
TCGATGTGCGCCGTGGCGATTTTCGTGCGCGGCATGGCGGGCCGGGCGATCGGCGAT  
CACGTTGATCGGCGAGAAGCCTGCAATGGTGTTCATTACGCGCCACGCCCGGCAGGA  
CAACACTCGCAAAGCGGTTTGGTTCCCTTGCCGAAGGCGATCTCGTAGCGGGTCACCT  
TGTTGCGCTTCAGATCCGAGACGAGCTTGTAGGCCGCGTTGTCGTCCTTGAGCGGGT  
TACCCGCATAGCTCAGACGGTAACCCGGGATCGAGTCGATCTTGAGCGTACCGTCG  
GCCAGGCCAGCCAGCAGGTCGGTGTGTCGCGGAACACATTGTTTTTGAAC  
AGCTCTTCGAGGGTTGCTGCCGGGTGCGGCAGGTAAGTCGTCACCTTCACGCTTGAC  
TGGCCATACACCAGGCGATCGATGACTTCCTCGCCATCGGTGACGCGCAGCAGCGC  
CAGGGCGCGCGTGCCACGGCCCAGTTGCTCGGTGACGCGGGCACGCAGCTCTTCTTC  
GCTGGTCACCAGCTTGGCATTGTTTCGGCTCGACGGTGTCGATGAAGACGGACGGCTT  
GGCGTCCTTCGACAGCTTGTTTCAGTCGCTCGATGCCCCATGCGCGGTGCAACTCGCG  
CGAGAACGTGCCGTGCTCGGTTTGCACGCGTGCGGTGAACTTCTCCTGCGAGACCGG  
AATCGTGATGGTGCGCGTTCTTCATTGCCCTCGCGGTAGTTCGGGTTCTCGAAGCT  
GACGCGCGGCGAAGTGCCATGACGCCTTCCAGGAAGCTGCGGTCCGAGTGCGTGG  
CCTCGTTGACCTTCTGCAGCGTGTTGACCCAGCGCGAAGTACGACCATGCGGTTCG  
CGTCGGACATCTGGTCGGTCAGGTAGCAGGATTCAAGGGTCAAGACCGAGCCGGCT  
GCATTCTCCGGCTTGTCGAAGATCTTTCGGCTACCGCCATGGCCCTTCACGAAATTG  
CTCACCGCGCGTTCCGCGTCGTCGCCGCGGAAGTCCACTGCCACAGGCAGGTGCGCG  
CCTGCACCGGGCACTTCGTTGAGCACGATGCCGGTCAGTTTGAGGCTTTCCTTGTCG  
CCGACCTTTTCGACCACAGCGGTGGACACCTGCAGGACGGCGGCGAAGGTATTGGG  
GGTGCGGCCACCGCCCTTCGGGGCGGCGGACTCACGCAGGGAGCGAAGTGCGGACA  
TTGCGATCTCCAGATAATGTCGAAAGGAGGACCGCACTGCGTACTTGCGGCCCCGAG  
ACCCGTTTGGGCTCGGGATCAATCTACCACTTTCGTTGGCATATAAGAACGCTTTTAT  
TGCCATCGAGTGTGGTTATTTGCGGTATCTTCGCGTATCTTCGCGTATTTCCGCGTAT  
CTTTTGTAATCTACCGGATCAGGAACGCTTCTACCTTGGCTACTGCCAAGACGCGGC

AAGCTGCTTATGCTCTTCGACCGTCGTCAAGCCAGCCAGTTCAGCCACCAAGTTTCG  
CAGCACCAGCGGTGCCGTGTGCGCAGCAGCTGGTGAGGGCGCAACCTCATCGGCTA  
GCCTCAACGCAAAGCCAATGTCTCGGGTCCGCATCGGATCCGCCCCGAGCCTTTCGA  
GCGCTTCACGCACACTCGTCTGTCCACCGAATGCCGGCGCAGCGTGGGCCCAAACC  
GCACTTGCGAGGTCCTTCGCCTCCGCTGCTGCGCCAACGGGCACGCCGAGTTGCACC  
GTGCAACTTTGGCCGTGCGCCAGCATCACCCGTAGGATCCAGTTCGACGTGGCGCGA  
TGTCACGACCGAGCAGAATGACATTCTGCGATCCAGCCACCTCGATGTCGTCAGCTG  
CAGCCTGGCTACCCATGTCAGGCTCGTAGCGCTCGCGCACCCACCCAGCAGATCTT  
CAGGGGTCAGATTGAACTGCCGTGCGGCCAGCGCTAGGTCACCCAGTCCATCGCA  
CCCATGCTCTGTTCGAAGGCCTGGTTCGAACTCTTTGACTGTCATATCGCGGGCGAGC  
ACCTGGCGCCAATGCGAAGCTTGGATCTGCATCGTGTGATGCCGGTTGTGTCGTCGCG  
CACATCGTCCCCTTGGCCACATCCGGGGTACCCGGACCTTGCGGAAGAAGGGTTGC  
GTGACGGACACGACCACGCGGCCACCGCCCGCCACCGATCATGTACTGATCCGTGCG  
CGCCAGGCCGCTCCGCCCCGGAACAGCCTTCGGTGGATGGACCTGCGTGATCGCAG  
AGTTGGCGCCCAGCAGCCGTGAGAGCAGCTCCACCGCCGCCAACGCATCCTCCACC  
TTGGTGAACGCACCAAGCTTCACGCGCCAAAAATGGACCCTCTGGGAGTCCAAACG  
CCATGCGCCGGCGTCCAGTCGGAGGCCAAGCATAACCCATCAGCTCGACGATGGTAT  
TCACGCGAAGGCCGCGAATATTGCCACCCAGCCAGGAGGCTACGTTGGCGCGTGGG  
ATATTCGCGGCCCCGAGAGAGCGTATAGATGTCGTATCCCAACAGTTGCGCCAGCAG  
ATGAGCCAGTCCGCTCACCGAGATTTTCGTTTTTCGACATCGAATGCTCCTAGTCTTTT  
GACCCCATCACCATCACATCAGCTCTTTCCGCCGCCCGCTTAGGCTGTCGCGATCA  
ATTGCCGGCTCTCGTGTTACGTATTGCCTCGTCTCGCCGACCAATGCCACCTCTGC  
GACGCCGCAGGAATCCATCAGGCCACGCACCATCTTTTCTGCCACGGCCACATCTTG  
TGTCAGCCAGATTGCTGGACGGCTTCCGAAACTGCCCTGTCGCTGTCGACCAGGAT  
CCTGTCGACGCCGAGCAACTTGGCGACACCGGAGGCGACCTCACCGGTGCGACGCA  
GCATGGCCACAGCACCTCCATCCGCGATCAACAGGAAAAATGACTCCCGACAGCCG  
GCAGTGGTAACGACGCCGACCGAATATCGACCCATGACATCAAGAAGCACTCTCAA  
GCCGCCCATCAGATGGTCCTCAGCGCCCAAGTCCCACCTGTGCAGGGACCTGGTCAG  
CGTCAGATCCCAATGGAGGCCAGCGCGAAAAGCACCGCGCGCAATTTGACATCGG  
AAATGTTCCGCCGGCCGCCATGACTGCGGATGAAGGACGACAGGTTGCTCCTGTGC  
GTCTCCGCTTCCACGGCAACCTTCTGCAGCGAAACCCCTGCCATCGCTGGGTCCCC  
ACCACAAAGCCCAACGCTGCAGCCATACGGCTACGCATTGCGGATTCGGCTTCGTG  
TTAGCCACTTTCGTTGTCAATTTACAGGCCTTTGATCTAACAATAATAGTGCATTTTCG  
CGAACACCGAAGCAAGCCATGACCGTGCCCGCCCAGCCACGCCTCAGCATCGAACT  
GATCCCTTCCAGCTGCTGGTACAAGAACGTCCGCAGCAATGTACGTGTGACCACCTG  
GTCCCGCCTCCAGTCTCTGATCTCTACCGCCTCTGGCGGGCCGATGCGAGATCTGCGG  
CGGTCAAGGACACCAGCATCCGGTGAATGCCACGAGGTGTGGACGTTTCGACGAAC  
GCCTGCTGCTGCAGCGCCTCGATCGACTCGTCTCCTTGTGCCCGGCGTGCCACGGGG  
TCAAACACCTCGGCCGATGGCTGGCCCGAGGTCAGGTTACGCGCCCACTCGCTTGGT  
ATTGCCATGTGAACCACACCACACCTGCGGAAGCCGCCGCCGCGGTTTCGAGCCGCG

CTCGAACTGAATGCCCAACGCTCCCGTTGCCGGTACCAGCTCGATGTTTCGTGGCTT  
CAGCGAGTCGGCGTGGACCTTGCGGCGCATGGCGTGGAGGTTGGTCATACATCCGTC  
GCCATGGACTACTAGCGCCACGCCTGCACCAGCGCCCGCATCCTGGCAGCGTGCTCA  
GCGTCAACACGCTGCGCGTTCTTCTTGACTTGGTCGTACCGGGTGCGCATACGCTCG  
GTGTATTTCGTTCGTTGGTCTCGTTGGGCAGGAACGCCAGCTCAGCGGCGATTGTTGGTCC  
TGCAAAGGAGAACTACCGTCAGAACGCTGGCCGCCGGCGGAGATATCGGCGCGTA  
TTCGGTAACCGGCGCCCTAGAGGCGGCCTGCGTCGGCGTACCGGCGGCAGCGGCCG  
GCTCCAACTGGGGTGGGGTCAGCCGGTTAACAACCTGTGCCTGTGCGGCGCCAAAA  
ACGCCAGCCATATTGATCAATGCGAGCATCCACAGACGAGTTCTGTTATGCACGGCG  
GTCACCTTGGGCCACTGCCCCCTGCAGACGAGCAGCGTCATATTTACCCTTGATCTC  
GCGGATGAGTTCATTGATCACGCCATCTTCTTTTCGCTATCCACCATAACGCCGCTG  
TTCTGCAGCGCGAGCTTGCGGCGCTCGATCTCCGGCAACAATGTGCCCGCCGGATAA  
AGCGCAGCGAGCAGCCTCCGTGTTTCTTGTCGCGCGATCTGTGAATAAAGGACATCG  
CGCACGTAGGAGTCCTCGTTTGACGTGAAAAAGCCCAAAGCCTGATACCGCCCAT  
CTTCAGGTTGAGCAGCTGGGTGACCGGCCCGCTTCTCGTCTTGAAGATCACCACCAT  
CGTCGAGCCATCCTTCGCGGTTGGAGGGCGGATATGCTTCTTAGCCGCGTGGAGCAC  
TGTCGGGGATGCCTGCCACTTGTCCCGCATCAGCTCAGCGGAATCGTCATCCGTTGG  
CGAAAGAACAAAGTTTCCTGTCGAGAACGAGAGCACGGCCTCTGGGAAGTCCTGCG  
GCCGATGCGAAATAAGCGTCAGCATGACGCCCCACTTACCACCCTCTCGTGCATCCA  
GCTCAAGCTGATTCTGTACAGCGGCAGCCTTTGACGTGCGATGTACCTCGTCGAACA  
CCAGGTGTTTACGGTTCTGCCGGATCTCACGAATTCGCTGTTTCGTGGTGTCCCTTGTA  
CTCGGGCGGGGAAGGAATCGATGTGCTCCTCGCGCAGGTAGAAGTTGCGGGCAGCAG  
CATGCCTGGCAAGCATGTAGCAAACGTTGGTCTGGTGATCAGCCACCGCACTACCTT  
GCTTTGCCACCTCATCCAAGTCGATCGACACGATCCTTGCATCGCCACGTCAAATG  
CCGTTGGACGCGACAGGATCGGGTAGCGACGAATGGCCTCCGATAGCATTTCGCGCG  
AATGCCTGTAGCAGCGGCTCGCCCGAGTTGGTCAGCTTTTCGCCGTACAGGTCAGAA  
AACTGCCGTTTCGCGGCTGACAGCCGCCAGATCCGTCAGCGTTGGAACGGCGTAGCG  
CTGCGCTAGCGACGCAGCGTGTATGTCGCCGCGAGAAAAACAAGTGGTCCACAATCT  
CCCACCAGGTGGTGTTCGCGATCGACATGGAGCCCATGCGCGACAATGGCACGATCG  
ACCAGTTCAGCGCCCTCCGTTTTCGCGGCTGTACCGGCGCGGCTGCGCATTGTTCGGCG  
AAGTGCTTGTACGCATAATCGATGACACCAGCGCAAAGCCCAGCCATGCCGTCAGC  
TGGATGCGGCTCTCCCGGAGGCGTCATAAGCAGCGTGGTGAAATTGACGGCTAGCG  
CCTCCTCGTGCGGGAGCGGGCGCCGGCAGCCAAGCTGTGTGTGAATGGGTTACG  
GAGTCCTCGGGACGCATCCGCATCCGGAAGTGCACGACTTGGTGCTTAGACTGCTCC  
GTCGCCGCCTCCCGGATAAGCGAGGTGAAGCCCGAGCTGGAGCGACCGATGTCAAT  
GATCGCGATATACGGCAGGTTCGGTCAGACCTGGAGACAGGGTGAATGCCAGATTCA  
TCGCGTTCACCAGCACCGACTTACCCGCGCGGGGCTCGGCGATAACTGTGTTGATCC  
AGTTCGACTGAACGGAGGACGATGGCTGGAATGGAAAAAGCTTGCCGTCCGGCGAA  
TTGAACATCAACGCGCCGAAATCCCAAGGTGACGCCGGTCGGTAGAAGCTCAGCAT  
CTGCGTGACATCCGCCAGTGCCGCGCAGGCAACCGTCGCCGGGGCTGTTCAGACTCA

ACCCTGGCGTGGTCGCCACCAAGGCCTGCACCGGATCGCCTGACAGCTCTCTGACGT  
CCGTACCACCCACGCCTGCACCGCACGGGCGAGCTTGGATGTACGGTCTTCCAGCA  
GCTTCGCGTTGCCTGCCGGCGCCCAAGAGGTGAGATCAACCCGCAGCTTCACGTCGA  
GCTCGTTCTGCTCACGTACCAGGTACTCGATGCGATCAGCTGCGGCACGCATGAGCC  
CGTTCTCCGGGTGGTGAACCCGATGATCGCGGTAATAAGACGCTTAAAGCCCAGG  
GAGGTTAGCCCTCCCGACTCGATCTGGAAC TTGATCCGCCAAGGCGCACGGGTGTCC  
CTCACTCGGCGGAACAGCGCCTGAAACGGCACCGTCTCGCTCCCTGATTGGTGCATG  
AAGATGTACATCGGCTTGTAGGCGATCGCCCCCTACAGTGCAGGAGGTGGAGCTCTCT  
TCCCGGATGTTGCGGGGCGCCAGCTGGCGGTCAAGCCGTGGCCACAGCGCGCCAGA  
CATATCCGCCGGATTTGCGCGCTGCTCGCGCACAGGGATCTTGTCGCCGGGGAGGCT  
TGGGCGCCACTCTGCTGCCGTGAAC TCTCGGTCAATCGACATGCGCATGTCCCGGCA  
AGCGTCGTGCACCTCCAGCTGCACCAGGGAAATCTCGGCCGCTGCCATCTCCTGCAT  
GAAGGAGGAGACGAAGGAATCATGTCTGCTCTTGAGCCCAGCGATCACCCGAAACA  
GATTGGGTGCATCTTCCATCGTGGGAATGGGATTGTCTTTCAGCAGCTCCATGCGCG  
CCGCAACATCGCGCTTCAACTCGGTAGCGGTAAATGCCGATGGGCGAGTATAGAGA  
GCGACCCAGCAGCGCTCAGCGCTGCAGGACTCCCTCAGCATCGCGACATCTTCCTCA  
AAGAGATCTTCGAGGTT CAGACCAATCCGGACAGCAGTGTCCCGCATCGGTTTCTGC  
GCTTCACGCACCTCGCGCTCGACGAGGTCCGGATCAGATT CGAAGATGCACGACAG  
CGCATGACCACCACCACGCATGAATGCCTTGAGTGAATTTGTCAGGCGTCCATCAAT  
CTCAGGAACTCATCAACACCAATCATGCGTCTGGAACCATTGACTCGAAGAAGCG  
TCATGCGAGAGCCATCCTTGAGCACGAAGGTGGTCTCGTCTTCGGTGTATTCGATGT  
CCAGGTAGTCAGCAACGCTCTGCTTAACTGAACTACTGAAGTACGCGAGGGGCGCCC  
TCAGCAATATCTGCGATTTGCTCGACGATCTTCATTGCGCTCCTTAGGTGCTCGAAAC  
AGAGCTGAACTGCTTGCGCACGCTGCTGGCGTGCTCGGTGAAAACGGCTGTGCGAG  
CGTCGCGCAAGCTTGCCGGGACTCTCTCTTGATGAACGACCTGACCACTTCCAAGT  
CGCGAATCGTGGTCTGAAGCTCATCCTGGGTTCTTGGCATAACGCTCAGACGCCCAA  
GGGCCATAATCAGCCCATGTTGCGCGCGTCCCGCAGGACCACCTCCAGCGCGTGC  
AGCGTCTGCGGGTCAACCGACATCCTGGAGATCCTCCTGCACGTCGATGTCCTCACT  
CATCGTGGTCGGAGCAAGCATTCCCGCCGAAACAGCAACCTCGTAGGCATCCCGAT  
AGTTGTATTTGGGCACTCGTGCCACTACGACTCCTGCACCGTAGTAGCAGACCGTGA  
AACCCGCCTGGTGCAGGCTCAGCGCATTGGTGAACATCTGGAACCGATCTACCGAC  
GTCAGCCACGCGGCACGTGGCGAGGTTGCGCGTTGCTGCTCTTCCCTGGTTCCAAT  
CGATATGGATTCTCTCGACACAGGCCAATCCAGTGATTCGTTGCCAGGATCTGCGTG  
TTGGGCGTCATCGCCTGCAGGTCCGTGATGTCGTCTGGGAGCAGACATTGCGAAGGC  
ATCTGCCGGTACTCCGAAAACACATAGGCCGATTCGATCTCGACCCTGGCAAAATTC  
GACAGCAGAAGGATCTCCGGCTGCGTCAGCCAGTTCCGGTTCGTCCCTGCCCTGCCC  
CCGTTGCCGTAGGAGATGAGATTGGCGAAGTCAGGGTGCACATCTGCTACCGAGAC  
ACGCGCAAGCACTGGGCGTGGATCGTTGAGGACCCAGTCCAAGCGCTTCCCGAACG  
GAGGGAGACTTTGCTTGTCAGATACTCGACCTGATCCGAAGGAATGATGGTCTGCG  
TCATCTCGCGGGCATAAGCCACTGCAGGCTTGGAGAAGCACACGTCGACGTAGTCTT

CAGTCCGGTGGTGGGGCGTCATGCAGGTGTTGTAGTAGAGATGGGATTACCGATC  
GCGCCATCGGCTTCGGGCCCCAAGCTCGGGTCAGCCACCGGCAGGAGCCGTGACCG  
AATCTCGTCGGCCAGTGTGTCGTACGGAACACCTCGCGCTGACTCAGGTCCACGTT  
GTAGCGGCGTGCAGCGACGCGCATCACCTGCGCGAAGATCGCACTCAGCGCCTCGG  
CGATCGTCTTCTCGGTGTATCGGCGCCGCACCAGCCCCCATGACTCGCAGAACGCGT  
CCTGTCCATCGCCGCGACGCCACGAGTGCATATAGGTAGTGCGCTTGACGTTTCGGAA  
GTCGGTGAATGTTTCGCTTCCACATGCTGTCAAATGACAAGTTCGTCCACCACACGG  
TAGAACTGTCCAGGCTGCTGGCGTTGGCTATTCGGAATGCCTCGCCGCCCTCAACTG  
AAGCCCAGCCGCCGGCGTTTCGGGTCTGTCGATGTGCAACCGAACCAGGCCGAAGTAC  
TTAGCCCCCATTTGCAACTCCGGCAGCTGCAGCGATCTCGCGCCAGCTCGCCAGGTC  
CAGATTCTTGAATCCGCTTCCGTCAACTAGCCAGGACTTGGCCAGCTCCACGATCGG  
ATCGAGCGGCGCCAGGTAGCGCACACCGGCCAGGAGCTGACCGCGGTCTGGCGTAAT  
CGGCATCACTCATCGACTGCAGAACTCTCGCCATCACGACAGGTGAGGACAGTTGA  
TGGCGCTGCGATTGCGCGTTCTTGGTGCCCTCCACCTGTGCCGCACGCGCTGTGAGC  
CGCGCGTAGACCACGTGGGGATAGATGTCATGACCTGCTTGCTCTGCGACCGTCACC  
ACTTCACCAGGCTTCATTTCTGCGGATCCCAACCGCAATGGTGTAGGCGATCGCTTGG  
AGCAGCGAGCTCAACTCCGCTTGGGTCAACTCAGGAAGATAGATGAGCGTTCCCGG  
GCTATCCGCCCATCGCCGACTTGCAAGGTCCAGGTGGTGCGGCATGTGGCACAGGA  
CACAAGCCAAGGTGAGGTTGTCAGCTGTGTTGTTGGCATGGTCACCGTCTAAGTGGT  
GGACTTCGCATTTCGTCTGCTACCCCAACCGAACTTGAAGTCACAGAAAGCACAGCGG  
CGCAGGAAACGCGCTTGGCCCAGCAGCGCCTCTCTGGAGCCCGCGTGCTCCTTGTC  
TTACGCCCAACCGTGCCCAGCGGCTGGGATCAGCCGCTGGGAGGCGCGTGCTACGGA  
GAGCAGGATGTCCCGCATCGTCAGGATACTTACTGCGGGGTGATGTTGATGCGCTGC  
GGACGACCGGCCTGGTCGCCGAACACCGTCTTGCCGAGCGTCCCAACGGTCAGCGG  
CAGCATCACCATGAGCACACCCACGATGCAGCCAACGAAGGACGTGGCAATCGACG  
CCTGTCCCTGACCCTTCTCCTTGTTACGCGGGTAGAAGCCATACACGCCGATGCACA  
CGATGATGAACCCGACCAGGCACACCAAAGACTGGATGAGCGTGAAGACGCCGTTG  
GCTGTTTCGGTTCCATTCTGAGCGATCGTTTTGACGTCCGGCGCGCCGGACATCTGAT  
CCTGTGCGAATGCGCCGAACGGGGTGAGAAGGGAAAGGCACACCAGCAGCAGGGT  
TGCCATTGCGAGCCAGGTTTCGTTTGTTACGATCATCACTATCTCCTTGGGACTTGGT  
TGAAGGGTGTGCGGATTAAAAAACTCTGCCGAAGCCAAGAAGCTTCGCGAGAGTG  
TTCACGGTGAGCACGATGTTGAGTAGTGCCGCGCCACCGAGAATGCGGAACATGGT  
CGAGCGGAACGTAATTTCTCCGCCTGATCGGTTGTCATTGAGTTTGCGTACTTGCAC  
CCAGCCCGTCACGGTGAAGAACAGCCCGTAGACCTGCAGCAACAGCACGATGACCT  
TCATCACCATCGCGGCCTGCGTCGGCATCGAATCGGTTGGCTTATAGGCAACCAGGT  
GCTGCACCGATGCACCCGAATTCCCGTAGAGCAAGCCGAATGCGGCGTCCGTTGAC  
AGTGCGAGGTTACCAGAGCTACGCCGGATACCAGATAGAGGAATGCGGTTCCGAG  
GTGTGCTTCACCGCGCTCGGTGTGCTGCTTGAACCTGTAGAGACCTTGGACAGTGAA  
AAGAACTCCCATCAGGCTAGCGATGGTTTGAATCAGTGCGCTGACATACGGAGCGA  
CCCCTTCCAGGTTGGCCAGCATCTGAGAAACGTCGTTTCATGGCCTGCCCTTATCGCA

GCGAGGTACCGTTGTTGAGGCGCACCTCGTTCCGTTCCACATCCACTGCGGACACGG  
TACCCGCCCCCGGAATGGTGTCGCCCCGGTGCTACCGACACAGTCTCCCCGTTCTTGA  
GCTGCAGCCAGGCCCCGTCCCTCAAGGACCGCTTTCAGTTGGATACCGCTTGCGGGCA  
CCGGTTCGGGCTTTGCGGCGGCCGTGACCGAGGAAGGCGCCGGCCTTGTTGCGCTAT  
CTCGCGATTTTCGGACGCGCAGGCGCTGCGTTTCGCCGTGCCGGCTGTGTTGCGGGCG  
CGGTGGCAACCGCGCGTCCCGAGGCGGTCAATTGTTGCGACGCGCTTTTCGAGCTCCA  
TCACCCTCGCCCTCAGTGCCTCCAGCTCCGTTTCAGCAACTGCAGACTGGTCACTTG  
CAGGAGTTGCCTGCGGCGTCGCAGAAGACTGGCTAGTTGCAACCGCGACCGGGGGC  
TGCTGAGCAGCAGATTGCGGCTGGGCGATTTGCTGCTCAGCCTGCACCCCTGCTGCA  
TGGTCGTTCTGCTGCGCAGGCGCGCTTTCGCCGCCGCCAGGCGTCCCCTGGTCAGCG  
GTCAATGACACCGGGGCGTCCGCCGCGGCACTGGCCGCGATTTGCCCATTTGCCGTT  
TCTCCGGGTACCCCGTACGGGTAAACCGCGGTTCGCAGGTGCGCCCGTCATCGGGACA  
GCTGCCTGCTCTTGACAGGGATGGACAGCGTGTGAGTAGCGGCCCCGCCACGGTTC  
ATCAGCTTGTAGCCGAACCATCCAACGAAGGCCACGATGAGGACGACAAAGCCGAT  
GAGCATGTACTTGGCCATGTTGGCCTTCCCACCTGTCTCCGCCGAGGATTGCTCTG  
GGATTCGGTGGTGAACACCGACTGGTTCGTCGCTGTATTCGCCCGCGGGCAGTGCATC  
GTCGTGATTGAAGTTGTTGTTTCATGGGGAGCCTTTATTTGCCGAATGCGGATGCAGG  
GACGTCGCTCAGAAAGAGCACGCCGATCTCGGTTTTCTGGCCGATACTCGCCGTGGG  
CTTCTGTTGATGGTGGGCTGCAACATCTGGGTTGCATTTCGTTCCGACTTTGCCGAGT  
CCGACAAGCGCCAGCTGCCGATCATTGAAGGCGTCTTTCTGCACAACAACGGTTTGT  
CCGGTGGTCACAACGTTCTCTTGCTGACCGCCAGCGATCAGAGCCTCGTTACCCCA  
CTCAACACCGACGAGAAGAACAACGAAGCCATCCGCGACGCGGTATGCCTGTTGAC  
GTCACCGACGCTAGCGCGCGATGTCGTGGGATCGATTGCGACTGCATCGATCTCAAC  
TGCGTCGCGCTTTTGTGCCCCGCTAGGAGGAGTAAGACTGGTGAAGTGAATAAACCC  
GCCGGGCGCGAACTCGCTGGTCTCGATCGTCCCGCGCATGACGCTTCCCTTGCCCGG  
CCCATTGAGGATTTCGAGCGCGTACCAGCGGCAGTCGATCGTCGGTCGTGGCGTCCCC  
CAAGGTGATCCCAAGGTACGTGTCATTCGCTCGCAGCAAGGCGCCGCTGGTGGTCTC  
CGCCATGTCGTGCGAGGCCGTACTTGCGACCGACGCTGAGCCCACTTGGGCATCCTC  
TGCTTCGCCTGCCTTTTCGTTTCTGATTTACAGCCACGCTTACGGGCGTTTGCACACTG  
ATCCAGCGGCCAACCAGGTTGTCGTAAGTCTGCTTGGACATGATCGCGTACCGTGCCTGG  
ACCTGCTGTTTCGTGCTGCTGCAGCCTGGCGGTAGCTTCGGCGCTTTGCGCCTGCGCT  
GTGGTGGCGGCAGCGGCCCGCGGCTCTGGCACAGCATTTCATGTTACGCCGGTGCC  
ATCGATGGTGACCTCGCCCTTGGCTTCCGCTGCGGCTTGGCCGGGCGCGTGGCATTGG  
CATTGCCGTGCCACCGGTCTGCTGCGCCTGTTTCAGCGCTTGGATGTCACCTCTGTTGC  
GCCAAGGCCTCGTACGCCTTGGTGTGTTGGTCAGCGTCTGGCCGCTCGGTGCGACGGTC  
GGCTCGGGCACACTTTCAAGCACAACTCGCCATTGTTGGCGGGCTTGCCGCCTCCC  
ATGAAGCTAAAGGCCAGCACCACCACGACCAGACTCAGGACAATTCCACCGATGAA  
GATGAGGCGGGTTGGTCCGTGTTTGAGCGCGCTGGCGATGTTGCCAGCGCGTAGTTT  
GATATCGCTTTCCTGCTGAGCCATCACGGCGCCTCTATCTTGACGTGCTTGGGACTTC  
CGCTAATCGACACCACCACAATCGGGGTCGGTGGGATTTTCGTAGTAGCTGGTGCCGT

CCGGACTCTTGCCTGGATTGCGGTAAGCGGGCGACAGAAGTGTCAGTGGCGTCTTTA  
CGTAGTAGGCCCGTTGTAGGCCCAAGCCTGCACATCGGGGCTATCGCTCTTCAGCG  
CGACAGCACCTTGCGGGATGGCACCGGTAATAAACTCCAGCATCGTGGTGGTCACA  
GCACTGCCGGCGCTTCCACTACCTGCGAGCTTCTGGGCAATGTTCCCGCCGATGACC  
CGAACATCTACCCGGTAGTCGACTTCCCGTTGACCCGTGATCAACATCAGCGGGACG  
GGGGCCGAAACACCTTTCAAGGAGACGGAGATGTTCCCGGTTCGCATAGGGCTGTGT  
GGGAAATAGCTTGAGAACATTGCTGTTCTCGGCCACCGGGAAGGCGTCGAACCCTC  
CTTTCATGAGATCGGGCGACGTGATCGGTAGCGCATTGCCGATCCCGTCCACGAACA  
GCACATTTGTTACCGCGCCATAGGCCAAGCGCACCAACCGCCGGTTCTGCGCCGGGG  
GCCAGATTTGCGACTACGGAGGTTGATACAGGCCTGGGCGTGCCACGCGCTGCTATC  
GACGCGGCACGTTCCGCGTCGTCTACGAGACGACGGAGATCTCGGATCTGCTCTGGT  
GTGAGCGGCGCAGCGTTGGCTTTGACGCGATCGAAAGCGACCTCATTGACCTCGGG  
AAGGATCGGCAGGCCGGGCGCCGGCACAGTGGTACCGGCAGGCGGCGCGGCCGGT  
GCTTGCTGCAGGGGTGCGGCAGCGGCCCTGCAGCTGGTGCCTGCGCCATGGCCGC  
CGCCGACGCCAGCAATGCCGCGCTCGCCAGAAACATGCGTCCCAGGATCATTGCCG  
GCGTTCCTCGGCCGTGTACGCGCTGATGCCAATGCCATACTGGTTCTCGTACTCGGG  
GACGCGTTGCACGGTGGCTGTAATAAGCAGGTTCTGTGTCGCCAGACCTCGACCGCC  
CTCACCGCCCTGGAAGCTGACGCGAATCGGCATCTGCACGGTGTAGGTCAAGACGC  
CACCGATCTGCTGCTCTCCGATTATGACCGGCACGCCCGTAGCGACTGCTTGAGTCA  
CAAGACGCTGGCGGGCGGACCGCCTTCAAGGTTCCGACGCGTTCCAGTTCCTGCGCAA  
ATGCGTTCCAACCGCCATCCGTAAAGCAGGTGGAGATGGATTGGAAGCTTTGCTGG  
AAGTTGACGAAGTCGTAGGTGTTGGCGCCCTGAACACACTCCTGGACACGAGTGAG  
CATCGCGGGTTTGGCCAGGTACGGCTCGTTCAGCGGCACGAGGCGGACCATACGGC  
CCGTCTTGAAATCGACGCCAAAGTACTCGCGCCGTACCTCCCGGCGCTCTTTGAACA  
TGTTCCAGCCCACCTGGGCACATTGCGCAAACGACAAAATTAAGATTGCCGCAACC  
AACTTCCCGAAATGGCGCCCATAGAAGGCCAGCTTTGCTACATCAATTGCCAGCGGC  
GGATAGCCACCTAGCGGGGCTCACTGCGTCAGGCTTAGCCTTGGAGCTGGCAGGCGG  
TTTCGGAGAATCGTCCATTCGTGCGGCCACAACCTGTTTGGAAATCGTTCACGAGGAT  
ACGACACCATAACAGGCGGGTCAACGATATATGCCAACGAATGTGGCCTTTGGCCG  
TGGGAAGAACGGCATAGTTGGACACCGATTGCACGAACCTCTGCCGGTCACTCGGCC  
GGGCGCCTTTATGCGGTCACAACCGGCGCACATCAGCAGCTGCTGGACGTCCATTCC  
ACGATGTAGCGCCGGCGCTACTTATCGCGCGAGGGCTACAGCGGTCACTACTTCACT  
GACTTACCGCACCAAGTGATATGGACGTCGGCAAGCACCGCGCAAAATCACTAGAA  
ATCAGCTGTTTCGGCGGCCTGTGTACAACCTATGCCGGAGAGCTGTGGCTATAAAGGA  
TTTGGTAACCGTATGATGGGCGAATTTTCACAACTATGCCGATCGAGGGAGCACCA  
ACTAGGCCGTTCTCTCCAGCCATCCCCCTTTCTGGGGGGCCACCGGGGACTACAGCT  
CTTTCAGATTCACCAAGTGCGCTTCATCGGCGAGCGCGTCGCAGGCAACCAGCCTCA  
TTTCAGCCTGCAAATCCAAGGCCTCGCTGTGGCTCATGACCGACAGCACATCGAAGC  
CAGCGGAACGTAGGTACCCCGAGAGCGCCGAGGCGTCAGCAGCCGTACCGAATCCT  
GCCATTGCGGTAGCCTCTGAGACACGGCCGCCGCCGACATATTTGCCAACGAAAGT

GAACACGTTGGACGATTGACGCCGCTGACCTGGCTCTACCGGAAACAAGTCGAGGT  
ACTCTTCAGCCCCCACTTCTGCGCTGCATGACGCAATTGCGTCCAGGATCTCAACGC  
TCTGACGAACGTCCGCCAGGCTTGCATAGATGTGACCTCGAAATCCCAATCACGA  
AATCGTGCGACCAGCTCCTCTGGAGAGGTGGCAATGACGTACGCGCCCTTCTGGTCT  
CCGAGCCCGGCGACGCGGCCGGCGACGGTGAACACGTGGTTGTCTGGGTGGACCGG  
CTGCATCGGTGCACGCCTTATCGGGGTCGGGGGGCGCTAGGCGCGTTGGGGAGATC  
CCGGTAGTCAAGCTTCTCTTGGCGGGTCGCGGCCGACGAGAGACAGCGCCAATAC  
CACAGGGAACACCGGCCTTCAACGGCACAGCGAAGACCGGGAGCTGGATCTGATTC  
ATGGGAACACCTCGAAAGCGGTAGGTCCGCGTTGGCCGGACTATACCGCCCTCGGA  
TACTTATGCCAACAAAAGTGGTGCGGCGACTCGCCGGCAGCTGACGGCTGGGCTTA  
GCACCGAGATGCAGGGTCCTCCTTCCGGAGAGTTACTCCCGGTCAGTCGTTCCGCGGC  
CACATGCTGGATTAGCAGCTTCCGATACAAAGGGCCAGAGAATTCCTGTTTCCGTAG  
GGAGTCATAGATCAGTTTGTATCGGCTGCCAGTTGCTGCCGGAAGCTCTCTTCCAG  
CTTGGCTCGCTGCTCGGAATCGAGTGCGTCTAATCGAGCTTCTGCGGTATGAAGGCG  
CGCCTGTAGCTGCAGCTTACGCTCGGCTTCCGCAGATTCAGCCGCAAGCGTGGCCTC  
GTCCTTGGGCTTCTCGCTTGCTGGTTTTCGTGCTTCCAAGGTCAATGTGGTCTGCTTC  
TGCGACAGGCTTTCAGGCGTGGCATTTCGCGCCACACGAAGGAAGTACGGTGCCAG  
CTTGTGCTTCTGTACCTTGCCCTCCTGAAAGCGCGCTACCACGTAGTCTCGCACCGC  
GCGTAGTCGTTTCATCGGAGTGCTGCTCGAACAACCTTGACTACAGATCCATACCCAAG  
GGTCATCTCTTCCTGCAGGCGCGTCACCAAATCGGTATCGCGGCCATGGAACGGATC  
GGCCTGCTCTCGCATTTTGTCCAAGCCGCCATCGCCAAGGATCTTGATCGCGAATGC  
AACGCTCACTACCTTGCGGGCGCTTCTATTGAGAATGGGCTCAAGTTGGATCGGCGC  
CACGCGATTTACCTCGCGACAAGCTGGGTTCAACACCTTGTCTTTGAACTTGCCGAA  
GTCGTCATACGTGGAGTTGCCGGCAACCCCCAGCAATCCCTTCAGGTCTGGCAGAGC  
AAAAGCCGGTGTCACGCCCTCTTCCGCGTACACCATGCAGTTCTCGTACAGCGCCAA  
TGCAGGACTGCTCTTCATCAGGCGCGTAACGCTTGCGCTAAGCACTCCGCTGACTTC  
GGGATCGTAGAGGCGCTTGCGCAGCTCCGGACTGAAGGAGTAGTAGACAACCCCAT  
CTTCGATGCGCGCAGAGGCGAGTGTGGCGCTCACTGCCCAGGCAGCGCGCCCGTCG  
GAGCGCAGAATGTTCCACTGCACGGGGGATGTAACCAGCCCCGTGAGTGAATCTTTT  
AGGTAAGGCGTGTTCTTGCTGTTGAAACCAGCGAGGTAGGACAGCACGCCAATAGG  
GATTTGGTGGGAAATGATGCTGAAGTTCGGCAGCTCGTCATAGCCGTTGAGGAGCA  
GAGCGGCGAAAACCTTGCGTTGTAGCAGGGTCAGACTATTAAAGATCTGGATGGCA  
CCCACATGCTTCCGCACGATCATGTTCCGCGGTGCTTTATCGCATTCGTTGCGGTCTT  
GGTGCGACTGCTTTGAATGGGAGGCTGGTTTGGCGAGTGCGGTCATACGGGATTCTT  
CTTTGGGCCGCGGTCCGAACGAAGGATCAGCAGATGTATCCCAACGAAAGTGGTTG  
CATTGAAGCACAGAACGCCGATCGGCACCTCAGTTGACTGCTTGGAAGTCCCTGCG  
GGGTGCTGGCAGGGTGTGGTCCAGTCGACTGTCCCATGTTGGGCTTTGGCTGTGCT  
TCGGCTGCCTTGTTGTGTGTCTTTTTTTTAGACAAACAATACATACAAGGGCCAGCTT  
GGCGAATTGTAACATACTGATAAATAAGAATTTCTGTGCGCAAACCTCCCCTTGAAT  
GGGGAGTAATCGCCCACTCAATGGGGCGTAACCTCCCCGCTTCTGGGGAACGAACA

CCCCTGATATGGGGAGTCGTGTCAGCCGAGCCTCCCCAGTGGCGGGGTGAACTCG  
CCCCATAACTGGGGAACTCTCCCTTTTTCTGGGGAGCCCCATGAATAGGGAGGTTGG  
GGATAGCTGGCCACGCGCTTGTCTGGGTGCGATCGGCTCCCGCTGCGGCGGGACGAC  
GCGTAGATATCCACCCCATTCCTGGGGCGCTTGTGGTCAATCTCGCTAAATTGTTGTT  
GACGTGTTCCATTTAAACGGCACAATACGGTAAAAATGGAACACGCGCAACACAAC  
CTCAAGCAGACATGGAGACAGTATGAGCACGACCGCCGAGCAGTCCCCACCCCGG  
CCATTGGCGCCGATTACCTTGTGCAGCTTGGCGATCGCATTGGCCAGATGGTCATGC  
GTGCCAAGGACTTTTCCCACCCAAGCAAGCTGAGTCCGGAACAGGGCGAGAGCCGC  
CGGCTGAGCTTGCGGGAGATTGCCGACTCGATTGGCGTCAGCCATTTCGACGGTCAAC  
CGGGTGGCCGCGAACATGATGAGTCCGGATGCTGCTGGCGGCACTGAAAGTCCGAA  
GTCCACGGGGCGCACCGGTTACAGGTATAGCCTGGCTGAAGCGGTGGCGTTGCGAA  
AAGCGATCGCGGAGCTGCCGGAAATCCGGAAGAAGGCCAAGCTGGACCGGCGCCG  
TGGCGCCGGCGAGCCCTGCGTGACGTTGGGAATCATGAACTTCAAGGGGGGCGTCG  
CGAAATCGACCACCACGGCTCACGCCGGCGCTTACCTGAGCCTACACGGCTACCGA  
ACCCTGGTGATCGACACCGACCCGCAAGCAACGCTGTCGACCCTCTTCGGGATTCAT  
CCCGATATTGAATTGTCTGTCTGAAGACACGCTGCTCCCTTATTTTCGAGGGTTCCGAG  
ACGTCGCTTGATTACTGCATCCGCAAGACGGAGATCCCCACGTTAGACGTGATCCCG  
TCGAACGTGGGGTTGGCGTCGGCGGATCTGGTGCTGCCGTCGCGTCAGCGAGATATG  
CGTCAGGCTGGCGATCTGTCTGTTCTACATGAAAGTCTTGGCGGAAGGTATCGCA  
ACCATCGAGAAGGATTACGACGTGATCCTGATTGACTGCCCCGCTTCCATGTCCTAC  
CTGACCACAGTGGCCACCCAGGCCTGTGACGCGTTGCTGGTACCCATGCGTCCTTCG  
ATGCCGGATTTTGCATCCTCCGCTCAGTTCATCCGGATGTTTCGGCGGGCTTCCAACGA  
GAGGTGGACGAGGTTGTCTGGCAACGCGAAAGAATTCGACTGGATCCAGGTTCTCAT  
TACGCTGGGAGAGAAACAACAATGCCTCGGCGGAAATGGAAGCCATCATCCGCAAGG  
CGTATGGGGATCTGGTTATGGGTGAGAAGTTTCCCTATCTGACGGCAGTCGCCCCGG  
CGGCGAAAGCAATGCGCACGATCTACGACGTAGCCCGTGCGGACACTGACACCCGC  
CAGCTGAGCAAGGCCATGAACATCGTCAATCAGCTGTGCCAGTCCATTGAGGCCCG  
CCTCCTGCTCACGCGTGCGAGGTTGACTGCACAGAGCAATGGCAATCAAGGCGAGA  
CTGAGGAGGCGGCATGAGCAAGCAGAAGGCAAGAAGCGCGGCGCTGCTGGGGGCA  
ATGGACGGCGAGGGCTTCCCGCCGCTCGCCCATGGTGCTGGTTCCGGTTCCGCCCCG  
CCGGACAGCTCGGTTCCGGCCTTGGGAATGGTGAGCGAGCTGGCCCCGCGATGAGTT  
GCGCCTGGCGCGCGAGAGGGTGGCTCAACTGCAGGGGCAACTCGACGCCGTGGCAG  
CAGCGGGGTCTGGTTCAGCTGGTAGACCCCGCAAGATCACCCACACGCAGTATCGC  
GATCGGGACGAGCTCGGATTCCGCGACGAGAAGTATGAGGAGCTGAAGGAAGACAT  
CCGGCGGAAGGGACGGAACGAGCAGCCATTCTCCTACGTCCCGCTCGCGCCGAGA  
ATGTCTGCTGCCGGCTTCGAGTTCGAGGTCTGCTGGGGGCATCGGCGTCATCGCGTGA  
CATCGGAAGTGGGCATCCCGGTGGAAGCGATCGTGCGGGATGTAAGTATGTCGCGAA  
GCGGTGCTGTTGATGTCCAGTGAGAATGCGCGCCGGGAGGGCTTGAGCCAGTACGA  
GCAGGCCCCGAAAGTACCGGACCTGGCTTAAGGCTGGTCTGTTTCGAGAATATGGTTGC  
AATCGCCGAAGCAGAAGGCGTCCACAAGGCAACAATCAGTCGGATCATGTCGATCA

ACGACCTCCCTGACGAAGTCTTTGCTGCCTTGAAGGATCCGCGAAAGGTCACCGGCC  
TATTTGCCGCGAAGTTCCTCCAGGCGGCTGAGACGAATGAGGAAGCCGTTGCATCTC  
TCAAAGACATGGAGAAGAACTGACTCCGGCTGAGCTTCTTAAGAAAGTTGCGCCG  
GTCGGCCCCAAGATGGATCCGATAGAGTTCAAAGCGGGGGAGCGGCGGATATTCGA  
GGCGGTTTCTGTCGCCGCTGAAGGCGGCACCAAGTTCAGCGAACTGCGACTTCATAT  
CGAACTTGACCAAGACAAGTTGAGGAGGTTGGCAGAGTTCGCCGCTAGCTTGTAAG  
CCGGTCTACATGGCAGTGAGATGAGCCCGCGCGAGCGGGCTTTTTCTTTTCTGCGC  
TTCAGCTCGGGGCTAGTTGCATGGTGCAATTCAGGGCGCATCGGTATCGCCACGAGT  
TGTGGGGCACGACAGAACGGGGTGGTGACGGGCGGTAGAGGGGGGGCGCCGTCGA  
GGGAGGTGCGGGCAAGGCGACAGTTTCACGAGCGACGCTGCAATCGGGTTGCACGG  
TGCAACTCGGGCGATCCCTGCTCATGCGCGAGCCGCGAGGGAGGCGCCGTAGGACGG  
GTGTTGCCAGCGGACACGGGCGGCCCAAGGAACTGCGCGGTCCTGCCAGTTGCACC  
GTGCAACTAGAGGTACGGCTTGCCACCATCGCGAGTTGCACGGTGCAACTCCAGGC  
GCGTCTTACCATCATCAGGAGTTGCACGGTGCAACTGTCACCAACACCAGCCACCGA  
TGCCGGGGGAGGGGGGGGCGAGCAGAATCGGGTTGCACGGTGCAACTTGAGCGCTCCC  
CTGCGACCACTCCGCGAGCTGCAGGGACACCGGTAGCTCGCGGGTGTGCGGCGGG  
GATCGCCGGTCCCAGGAATCGCGTCGGCTGTGTCAGTTGCACGGTGCAACTCCAGGC  
GCGTCTTACCATCATCACGAGTTGCACGGTGCAACTAGCACCAACACCACCCACTGG  
TGCCGGGGGAGGGGAGCCGGCGGAATCGGGTTGCACCGTGCAACCGTCTGTGCGGT  
CCTTAGGGCTTACCCTCACACCGGGTAAGGTAAGCCCCGACACGTAATCTCCCCATC  
TATGGGGGGATTACTCGCTCAGCAAGTGCCCCGTCAAAGCGTCGAGCTCATCAGCAT  
CGGCGAGTTCGATTTCGAGGCTTCTCATCGCGTTGCCGAGGTGGCCGGTGCCTTCAG  
GGCCCCGGGCGAGCTCCTGGAGCACACCTTTCAATGTCTCCATATCGGAGTAGCCGA  
TAATCAGCGACCGGGTTCCAGGCGCTTCTGGCCACTCCAGTCGTACGGGTGATCCCA  
GTCGCTGGCTTAGCTGGTCCTTAGGTGCTTAGTATCGGCTGCGGCCGGGGATGGGG  
TAGCTGGTGTCCCAGCCTTGCCCTCCCGCGCCACCATAGATGTCAGCGTGCGAACCG  
ACCACCTGCCGCGCAACGCCCCGCTGGTCCATTCTGCCTGCAATTGTGAAGGCAGGG  
GCAGTAGGGGCCTGGCGTGGCCGCGGGTAAGCGAGCCAGATAGGACGGCCCCCTCGC  
AGCTCCTGCGCGGCGCGCTTCAGTGCGGTCCAACGCCAGACCTCGGGATGATTACGC  
TCGCCCAGGAGAAGGCAGAGAGCGGTTCGCTTACATCGTCCGCCAGCGCAATCGC  
CAGCTGGATCTTCTCAATCACGGTGAGCTCTGCTGGGGAAGTGGTTCGAGCCTGAC  
AGCGGCCGCAATTGTCTCCGCATCAGTGAGCACGAGGCCGCCTACCAAATCATCCG  
GAAGTGCGGGCGCTGGCCCTGCAAGCAGGCGGTACCGCGCTCCCTCAGCGGACTGC  
AGAAGGCGGGGCGTGCCGGGGTCGTAGTCCACTCGATCCGGGCGGTGGGCCGTGAG  
CTGGGCAGAACGAATCTTGCGGGCCATAGTATTGTCACGTGGCAATGACTGTGCAGT  
GTCGCACGACATTCCAACCGCTTCAATATTGCCACGTGACAATATCTAGTGAGCCGA  
CTTAGCGGGCGCCCGACGGAGGGCGGTTGGCTGGTAGCCAGCCGCGCCTCGGCTG  
GGCTGGGCTGCGCTCCGCTTGAACCGGGGAGCCCGGTCAGACTCCAGTTATTGCCAC  
GTGGCAATAAGTTGCGCACCGCAGGCCGGTACCGGCTGGGGATTTCTAGCGTAATCA  
CCCCCGATGTGGGGGAGCCGCGGCGCACAGCGCACATATGTGGGTCTCCTATGCAT

GCGCTGGTGTGGGTTGACTCCAATTCTCCCCATATGTGGGGCGCACAATAGTGCTCT  
GTATTTGGGCGTAGAAAGCCAGGGAGACCGCCGCAGCCTCTCATGCAAGCGACGCG  
CATATATGTGCGCCGAATGCAGCGCGCTTGTTTGAGTTGCACGGTGCAACCCGAACC  
CTCCGAGTTGCACCATGCAACCGAACCACCGAGTTGCACCCTGCAACTCGGTGACTA  
GCGGCTTGGCTTGGTGCGTCGGGGCGCGTCCCGCGCTGGGCTGAACTTCGACAGCG  
GATCCCTGTGTTCTACGGTGGCCACGTTTTCGCTTGACGGCCGAACGCGGAGCCCCCT  
TGCTCCCTCCACGACGCTTGCCGTAATGCAAGGTGGCTGTCGCGTCTGTCTTGTGGC  
CCATCAACGCGGCCACAAACCTCAAGGATTCGGCGGAGCCAGTAGACGATTGCTTG  
GCATCGGCACAGACTTGGTGTCGCAAGGAATAGAGCGTCGGCCAGTGCTGCCGATT  
GCCGGTCGCCGGAAGATCTGCCGGGTAAGCCGGCGTAGGTAATCCCTCATGTGCTT  
CAACAGCTCGTCGAAGCTAACCGCCTTCCCATTGGCGTCCAGGATTTGACCACTCTG  
CACGCGATCTACGAGCTCAACCATCTCGTGTAGCGCGCCAAGCTCTTGTGTCGTCAG  
ATCATCCAGAAGCAGCGTGCGATGACTTCCGTTGCCGCGATCGTTTGTGGTCTTGGC  
ATTGCGGACGACCATAACGGTCATCCCGTCATACCGGACCGGATCGATGCCTCAGC  
CCACTCGCATGGTCGCAGACCCACGAGGCTATTCGCCTCAAGAAAGGTTTTGAGGCC  
AACGGCCCAGGAATGGCGGCTCTCGGAGATCCCCTTGTGGACTTCTCGCAGCACCA  
GGGCGAGCTCGGATGCCTTGAACGACTTCGACTTCAGAGCAGAGCCCCGCCCGCCCTT  
TGCGCGCGTATCCGGTCTGCGGCGTTCGAATCGAGCCGCTCGATCGCGGCGCTAAGTA  
ATTCGGTGTGCTATCGGGTGGGCGCCGTCTCCAGGTCAGCCTGAAACACCGCGCGCA  
AAGCAGCCTTGTATTGACGGAACGTGGCTTTGGATATGACACCGGCAGCGGCCGCCT  
CGGCAGCAGAACCCTGCATCCGGACGCCGCTTTTACTTGCGCCGGCTGAAGACTGCT  
TTTGATGGCGCTTAAAGGCGGCCAATGCGTCGGTTGCCGCCTGTTTCGCTGCCATGCC  
CCCGTCCCAGTAGGTCGTCGACCAGATCCATCGGGAGCAGATCAGCCGGGTTCTGA  
CCACGAATCCTGGCCGCCCGTTTACGCAAGTCCTCGACTCGACGGCGGTACTGGGCT  
TCTGTTTTCTCGGTGCGGGTGCTCGTTGTCATAACTCGATTTCGGTGGCAGAGCAATC  
AACTCGCTCCCTACGTTACCACGCAGGAAATACCCCGCGTGGTAACGCTCTTGGCTA  
CGCCAATAAAGACGCCACCTTATGGGGCAGCTTGGACAACGGAGGATGCGTTCTGC  
CGGCCCCGAGGGGCAGGGCGCACGGAAACGAAAAAGCTCCCATCGCCGTCCGAGG  
CCGGATGCGATCCCATAAGAGGGGATGTTTGCGCCCGATAGCACCAAGCAAGACCG  
GAGCCGGGTGGCAGCCAAGCCGCGCACAAATACATGCCAGGGAATCCCTATGGTCT  
GCGAAGTCGCGCGTTAGCGACACATATACGTGACCGCGCACAGAGCCGGCCTGTCA  
CATTTCGTTTCGCATATATGCGACGCGAGTACACGGTGGAAGTGTCGGTGCCGGGTGGT  
GATGTGATGCTGTGGGGGGTTGATTGCAGAGATACGGCGGGGATAACCTGCGCCACA  
AATGTTGTGTAATCCCTGCCACGTATTCACCAACGAAAGGCAACGTGCCCCGATGCG  
TCGCTACCAAGCTGTCCTCCTCGCCACCTGCGCGGCTCTATCCGCTGGCTGCGCCAC  
CACCAGATCAGCGGGACCATCCGCGTCGGACCCGGCGCAGGAGAATCTCACCGCCG  
CGGCATCGGCCATCCAGCAATCGTTGCGCGACCTCTCGGAAGCGGAGCAATACGAC  
AAGATGCGAGCCGTGCCCCGGCACCCCCGCGTCTTCGCACGCAGATTCCGGGCCTGGA  
GCGGATGGTGACCATGCCTTGGAACGGTCCGCTGGAGCCAGCCGTCATGCGTTTGGC  
TGCGGAGGGCGGCTACGAGTTCAAGCTTCTCGGCAGGCAACCGGCTGTAGGCATTG

TGGTGCAGGTCGGGCCCCGAGCCCGCAACGATCTCCGATCACCTGCGAAATCTGGGC  
ATTCAGGCCGGCACTCGCGCTGACATCGCAATCGAGCCGACTGCTGGCGGGCGCCG  
CGGCATTATCGCAATCGAGTACAGCAATGGCGGTCTCTGATGCCCCGCCGAACCTAG  
ACCAGGCGCTTGGTGC GTTCGAGCGAAACGGTGCTGAGGTCCGTGTGATTGACGCG  
ATTGGCGAGTTGCGCGCGTCCGCCATTCGTGAGGATGGACTGTCGTATGGCGTTCGC  
GCTGGACTTGCCCCGGCGCTCTTTCGAGATCCAGCAGCTGCTGGCCAAGCAGGCACCG  
CAGCTGGACCGAGCCTTTGATTTCTGGCTCCTTGCTCATGGATCGCAACGTCCTTCCCC  
CGGTGCTGACTGAAGCGAGTCAGGTCGTTCAATTCAGAGGGCACCGACGTTCTTCGTG  
TCACCGACAAGATCTATGCGATCGCGCGTCAAGCACAGTTCGTAACGGCCGCCCTA  
CCTGGCGCTCGTACGTCGTTACCGAGGCGACCTTCTCCTATGACCCACCCGAGCCAT  
ACATGGCACCCAAGAGTGGGGATGAGCGAACGGTATGGAAGCAGGCGGTACGAC  
CGGTTGGAAGGCAGGGGAGCAGCAGGCAGACCAGATCCTAACCGAATCGCTTAACA  
GGCTTAAGCGTGACTATCAGGGAATGCTGCTGTACCGGCGCCTGCTTCAACAGGGCG  
TCGTCAGCAAGCCATATGTGGCCGAGGCCAACTACGGAATCACAGGCGACGGGGAC  
AAGGTGAACATCAACGAGCGCATGCTGCGCATCACTGCGCTGCCCAAATGCAGCC  
GCACACACAGTGGAAGCCAATCGCGGTTCCGGCAAAGCCCATTACAGCCAACTGTTC  
GGGTGAACCCATGAACGCGGTGCTCTCCGACCAGAGCCTGATCGAGCGGGCGCTGC  
TGCGATCAGAGCCGACTGTCTTCGACGAAATCGGTGTCCAACAGCTTCTGGTCCATG  
CCAAAGCGATGGGCGCCTCGGACGTATACATCAAGACGAATGCCAGAGTCACCGCG  
CGGATCCACGGCCGGCTGTACCGGCTCACGCGCCGCACGCTGTATGCGACGGAGGT  
GGGCTCCATTGCCGGCTACCTCTACGGCGGGCCCAACGCCGAGGTTCAAGCTCAAGC  
GCGGGATGGACCTGGACAATGCATACACATTCCGCCTCAATCGCTCCGACTCGCTGC  
GCTTCCGTTGGAACGCGACCGGCGCGGAGATCGACGGGTCGTTTCGGTATCTCGATCA  
TCCTCCGCGAACTTCCCGAGATTCCACCGGCAATCGACAAAGAAGACTTGGGCGAT  
GACCTGTATGGCGCCTTGTACCCGGACGACGCGCATCGTGATGGTTTGCGGTCCGACC  
GGGTCAGGCAAGTCGACTCTCTTGCGGGGCATGATTCGGGATATCGCAGAGAACCC  
CGATTTCGCACTGCCACATCATCACCTACGAGTCGCCGGTGAGTTTGTCTACGACAA  
GGTCGAGAAGCCGACGACTGAGATTGAATCGACCTCCATCCCGGATCACCTGCCGA  
ACTTTGCCGCTGCAATCCGCAACTCGCTCCGGCGTGACCCAGACATCATCGTGGTTCG  
GTGAAATGCGCGACGGCGAGACGATTGGTGCGGCCATCCTTGCTTCGCAGACAGGT  
CACGTGGTGTATGGAACGGCACACAGTACTTCTGTCGGCGCTACTTTACACGCACC  
ATGCAGAGCCTGCCGAAGAACGAGCAGCAGGGAATGTTGGGTGGCCTCATCGACTC  
ACTGCGCCTCATCATCTGTGTCAGGAGCTCGTCCAGTCCACCGACGGCAAGCGCGTGGC  
GTTGCGTGAGTACCTGTCATTTCGGGGAAAGCGAGCGCCGCGCGCTCCTGACTGCCGC  
CATGCGGGATCCTGCAGGTGTGCCGTGCGTCGCGCAGCAGCTACCCGCGAGCGCG  
GGCAGACCAAGCTGATGCACGCACGGAAGCTTTTCGCTGCCGGTTCGCATCAAAGAG  
GACGTGGTACTCCGCTTCGAGCTCGCCGAGCAGACCGCAAGAGCGCAGGTAAGTTT  
GCTGGCCGGGGAGGGTGAGTGATGTCAGGACCGGCAGATTGGCGCAACACGTCACT  
GATGGCCAAGTTCTGGTCTTTGACGCGCGCGCATGTATCCCCCTTCGTCATCCTGTTC  
TACAGCCCGTCGTTTCGCCAAGCTGGGAGCGTCCATCGGGCTGTTCTTCTCTCG

GTCTTGTCTTTTACAAGTACACGCTCGTTGTGCTCGTGCGGCGCATGCGCTGCAAG  
CTCGCGGGGCTGTGCGGTCCGGCGTCGCCTGGTGGCATCGCCCACAACGCCGCCTG  
TATCGGCATCGCTGAGCCAAGCGCAACTCACCAGATACGCAACTAAGCGAGAGAAC  
CGTACCAATGAATCCGCGGCGAAAGGCCACTATCAACTGGGGCATCTTCACAATGA  
AGGTGCTCGCAATATTCGCGCTCGGCGTAGGAGCGATTAGCGTTAAGAGCACCACC  
GACACGGTGGGGATGCTGCTTGATCAGACCGGCGCACAAGTGCAGTTCATGCAGAA  
ACTTGTCGAAACCAATGATCCTGCACTTGCGGAAACGGCATTCAAGTACGGTCGCGA  
GGTCATCGGTTCTTCGACGCCACGGGCGCTGACGCAGCAGGTCTCGCGGTTTACGC  
GCTGGCGGCAATCACC GGCGTCTTCGCAATCTTCATTCTCCTCGGATTGCCGAGCAT  
CGACCGGGCGGGCCATGCCAAATCGCGTTGGTCGCTGCGAAAGACATCCGTACCCA  
ATGATATGAAATCGACCCCTTCGATGGCAATTCCAATGACTGAGTCCAATCCCATT  
CTTGTTGCCGTCGACGACGGTTTTCGCCAGATCAAGCTGGTAACCGCAGATCGCCGC  
CACGCGCAGCTGAGCGTGGCGCGCCAGGGTTTACCCTGGGCGGCGCACTGGGCTC  
CGCAGGGGGTGACGCGGGCGCGGGCGCCTACCGCACGCAGGGCCGGGATTTCACTG  
TTGATCCGGACATTGAAGGCGAGGACACGCGCTTTGACGACTATGCGCTATCCGATA  
TCAATCGCGTCCTGGTGCATCACGCCCTCTACGCCAACGGGCTGAGCGGTGCGGATG  
TCGTGCTGGCTTCGGGCTTGCCGTTTCGGACTIONTTACTTCCGTGCCGGTACAACCGAATC  
CAACGGAGATCTGCTCAAGCGCAAGATGGAGAACCTGGCTATCCCCGTTGAGTCGA  
TGGACGGTCGCAAGCCTCCCCGCATTGTCGGTCAGTTTGTGCGGTGCGCAGGGCCTGA  
TGGCCTATATCGATTACGCTCTTGATGACGCCAATAATTGGCGGGAAGGAATGGACC  
CCAGCGCGCCGGTAGTGGTGGTGGATGTAGGCGGCCGTACCACGGATACGGCAACA  
ATTATTCGTGGGTGCGACCGTTGATCACGCAGCGTCGGGGACGATCAACGTCGGTGTC  
ACGCATGTGCTCGACCATCTGCGCAGCCTCATCATGGCGAGGTTCCGTGTCGCGGGC  
GTTTCGTCCTTCGCGACTGGAGACGTTCTTACGATCGGGAAAGGTGCAACTGCGCGGC  
GAGTGGCATGACATCTGCTGAACGCGAGCAAGCCGTGACCTGGTACTGCAGCA  
AGTCCGGCGCGAGCTGCAGCGGCGGGTGGGCGACGCTGCAGACATGCAGGCAGTCC  
TGCTCGTCGGCGGCGGCGCCGCGCTGTTGGCCAGCGGCCTGAAGACGGGGTACCGG  
CACTTGGTGGTGCCTGAGGATCCCGAGTTCGCCAATGCGCGAGGCATGCTGAAGAC  
GCTGCGTGGGAACGTTGCCGCATGAGCGATGACGCGCCGTCCGGAAGCTGATGCG  
GATCCGCGTCTACGAGGACGACGCGGAGATGAATGCAATTCTCGATCGATTCAATC  
AGGTCCGCGAGAACTCGCGCAACCGGCGAGGACGCGCGCGCCGGGGTGCAGAGAG  
CGAATGGCTCAGACGGATCCTTGTCGCCGGCTATAACCAGCTCCACGGGGCCGTTCTA  
TGCGACTCAGGGAAGCCCGGCAGTAGGTCTGAACCGCCGACATTGGAGGTGCCTC  
ATGCGCCACGCCGAGCGCCACCCTCGTGCAAAGGCTGATGATCCGCCCATCGCG  
CCGGAATAACAAGTCAGGATAACCAAACAAAAGTTGCACATTCGGCGCCTTCGTC  
GAATAATGATACGGCGCAACAACAACGGCACTCGGCCGCTCCCATGAGCGCCGATG  
GCCTCGACTTCAAGCTGCTGCTGGGCGGCGGCAACAGCATCGTTTCGAGCCCCAAC  
CTACGTCGGATGCCACATGAAAAAAGGTCTCTCGCTCTTGTTGCGCTGCTTGGCGTT  
GGCACTTGCCAACCAGGCACAAGCTGGTTTCCGCGTGGCGTCGATCGAGCCTGCGCC  
GAAGGTTGCGGGTGCAGCGGCGTCCGTAGCAGGGATTGCTCCGCGAAGCGGCTATG

TGGCAATCGATGGCCAAGAGCCACCGCCGATCACGGAAGCGCTGCGTCCGAGCTCT  
TCAGGGTTTCGGGTTGATCGCTGTCTCATACGTGGGTGGTCCGCCGGCTGTAATTGAG  
CGCCGTGCCGGTATGGGGCGCGATGTACGGCTCGCTGACGCGCTTAAACAGATCGC  
GCCGGAGGGGCTGGCGTGGATTTGGGAAATCTGAGATCGCCGGATCATTCGATCCAA  
ATAAGCTTGTCAACTGGCGTGGCGGACGTCCGTGGACTGACGTGTTAGACATACTCG  
CAAATGAAAACGACCTCTCGATAGAAGTCGATTGGAACAAACGCCACTTGTACGTC  
GGCAAACGTGATTACCCTTTAGCTTCGACGAACACGGGCGGCGCGCAGCGTCTCGC  
CACGGCATCGACGCAGACGGCCCATCAGGCCAAACAGATTTGGTCCGCGAAGGCTG  
GATCGACTGTACGAGAAACGGTAGAGCAATGGGCGCAGTCACAGTCCTGGACGGTG  
TATTGGCCCATGCAGGATCTTGACTATCGAATCGTCGCGCCGCTGACATTCGATGGA  
TCGCTTGTGATGCGGTCAGCAAATAACCCTGCTCTACGAATCAGCCCAGCGACCT  
CTGGCAGTGGGGATTTTCGTCAATCAGAAGCTGATCCGCTATTCGAAAAGGAAGC  
AGCGAAATGAAGTACCTCTTCACATTGGCTGCAGCCGTCACTCTGTTGACTGGATGC  
TCGCACAGCATCCGCAATGCCGACCGCGCTTATCACGACGTTGATGGTGAAGCGAA  
GAAGCTGCTGATCGATATGCGGACTCCGTCTGTCCCCGGCCAACGCGAAACAGTCA  
CCATTTCCAACTCGCAATGGGTGGAGCCGGTACCGATGGCGGTCACTACTCCGAAGC  
TTCCAGCAGCTCTGAGATGCGACCCCGGATTCAAAACCTTGGAGCCAATGGGTCTCC  
TTGAATTCGCGCAGGCGGTTTCGGAGTCCTGCAAGATGGCAGTACGCGTTACAGCAG  
ATGCGCTATCCGCTTTTGGCAGTGGCGATAGCAGTAGTGCAACGTCCGGACCGTCCG  
CAGGTGCATCTGTGCCGGTTGGCGGTATGCCTCTACCAAATCTTCCGATGTTGCCGC  
CTGTCACCGGCACCGCTGCCAACGCAAGTGGTGGAAATCGGTGGTTCGCGCCGGCGGA  
GCTTTGCTAAGCAACATCGAATGGAAAGGCCCACTGGCCGGCTTGCTTGATCTCGTC  
GCCTCGCGATACGGGCTTTCTTGGCGTTACAACGAGCGGAATAACAGCGTCTCGATC  
TTCCATGTGGACAGCCGCACTTTCCAGCTGGACGCGTTCCCCAACCAGGTTGACATT  
CAGTCAACGACCCACAACGGCATGAGCTCTCAATTAGGTTCCGGTGGCGGCGGCGG  
CGGCGGCGGCGGTGCCAGCAGCGGCGGGTCCAGTGGAGGCGGCGTAAGTGGAACA  
GTCGGAAGCTCGCAAACGACCGTTACATCAATGAAGTCCTCGCTGTACACCGATGTC  
GAAAGTTCAATCAAGGTTCTGTAACTCCTGGCATCGGCCGTGTGGCGCTTTCACAG  
AGCACAGGCGCGGTGACGGTGACGGACACGCCGGATGTGCTTGATCGTATTGGGAG  
CATGCTGGAGCGGGAGAACACCACTCTTACCAAGCAGGTGACATTGCACGCGAAGG  
TACTTTCGCTGACCCTTAACGATGCGAACGAAGTGGGCGTGAATTGGGACGTGGTGT  
ACAGGTCGCTGTCGCGCCAGTTCGAATTCACCACCCCCTTCCAACCCGCCTCCAGCG  
CAGGAACACTGGGCGCGTCAGTGATCAACACGGGCAAGTTCGCCGGGACCAATGTC  
ATCGTGTCCGCACTGTGACGCTTGGTACCGTCAACACCATCACGTGCGCGTCGTTG  
AAGACATTGAACCTGCGTCCAGCGCCAATCCAGATCGCTCGCCAGATAGGCTATATC  
CAGAGCTCACAGATCTCCCAAACCGAGGGAGCTGGCACCCCTCGGAGGGCTGACCCC  
CGGGTTTGTCACTGTTGGCTTCAACATGACGGTGGTGCCCCGACTGCTTGCGCAGAA  
TGAAGAGATGATCTTGCAGTACTCGATCAACATCTCCGCGCTCAATGAGTTGCGGAG  
CGAAGAGGCTGGCGGGACCAAGATCGAGATGCCTGACATCGACACTCGCAACTTCA  
ACAGCGAGGTCCGTCTGCACGCTGGCGAAACGCTGATCCTTCACGGATTTCGAACAG

GACAATCACACGTCTAATCGCCGCGGCATGGGCAGCCCATTCGCGTGGATGCTTGGC  
GGAAGCGCTAGAGGACAGCGTCAGCGTACGGCCATTGTGATCCTGATCACACCGGA  
AGTCGGCTCTTCAATTTTCGGCCATGCGTTGATTGCTGGATCACAAAACAAACTCAGG  
ACACACCCATAGCATGGCGCGCCGCAAATCGATCGATACATCCATTGCCGATCGGC  
AGAAGATCGGCACGTTTCGTCTTAAACGGACGAACGTTTCGTAAGCGGTCTGCATTGG  
GAAACACTCGATAACGTGTCTTCTTTTATGAAGGAAGCGCGTAGCAAGGGTCGCCA  
GTGGGGCATGGATGTCGTCGCAACCCGTAAGGGTGTGCGACTTGCGCTCTAAGGGCA  
AAAGCGCAAAGTATCAGGCTGGCTATGCGCCCAAGAACCGCGGGCGCTGCCAAGGGC  
ATGTACTCGCTGGCCTCAGTACTAGCGAGCGAATTCGGCAGCAACTGGATCGGTGCT  
TTTCGCATCGAAGAGGAGCGCTATGCGCTGGCAGCCGTCGTGGATGGCAGCATTGTT  
CCGAGTGCGGACCGAATTGGTACGCTGTCAGAGATCCGCGAGGAGCTAGGCGCCAA  
CTTTAGTCACTTAGCTGGTTCTGGCGTGCTCTTTGAGCATGTGATCGCCCCCGGAG  
TTTGAATTTGGTGACAAGCAGGTTGATCTAGCATCGCTGCTGGTCGCCTCAAAGTTG  
AAGCCAGAGCACAGGCTAAAACCGCTAACGCTGGGGTTGAGTAAGGGTGAGCTGTT  
TCGACTAATCCTCTTCGCGGCGATCATTATCGCTGGCGGATCGCTGTATATCCTTTAC  
CAGGCAAGGCAAGAAGAGATGCTGCGTCGCGCTGATCAGGCGCAGAAAGCAGCAC  
GCTCCCGCGCAGAAGCTCTTCTAAACATCAAGCCGCCGCCACCAGCGCCACCACCG  
CCTTGGCTTGGCTCAGCCAACTAACTGACACGGTTGCTGCATGTTCCGGCTGCCTTC  
GACAAACTGCCCCTGGTATTGGGAGGCTGGGTCTTCGAGAAAGCCTCGTGTAACGCC  
GGGGGAGCGCTCTCCGCGGCCTATAAGAGGGGACAATTGGCGACGGCCAATAGTGT  
TCTATCTGCGGCCGATGCAGCGGGACTGCCGCTCGATTTCTACGACGCCGGTGAGTC  
TGGCGTCGTCAATGTGCTCATCAAATGCCGTGCGCCAGCAGTGAAGAGCTATTGGC  
GGAGAAGCAGGTGATGGCCCGACTTGTCTCACATTTCCAGGCAGCGGACGTCAAGT  
TTCCGCTTCAGAAACAGGCAGTCCCCGAAACGCCGCCGGGGGAAGAGCCGACTACG  
AGCAAACCGACATGGTCGACGTACACCTTCGAGATCGTGACGCAAATGCCGCCGGT  
GTCGCTGTTGGAAGGGCTGGCAGCCGATGGGCTGCGGGCGGAAACAGTCGCAGTCA  
GTCTAGACGGGGACGCCGCCAGGCTGACCTGGACCATTAAACGGAGCACTCTATGTA  
CGGTAACAAATGGCTCATCGGATTGTTCTGCTGACGCTTGCTGCAGATGCGGCGGC  
TCAGGATTCGGTACCGACCATCGGCGAGTTATCCAGAATCCAGGCGGCTACGCTGCT  
ACTGAAAGCACGCGCAGAACAAGCTAAGGCTCAAAGCGAATTGTCAGGTGACAGCA  
CAAAAAACGGTGCGATCTCATTGATTGAGCCAACCATCGCACCGGTAGTATCGCGTG  
TATACGGCGTAGGAGACAACTGAAGGCTAGGTTCCCTCTACGAGGGCGGAGCTTCT  
ACCGATGAAGTAGTGGGGTCCTTGATTCCCTGGTGACTACCGAGTTGTGGCGGTGTCC  
ATGGAGCGAGTGATCGTTGAGCGTCAAGGAAAGCGCTTAGAACTCGCATTTTCCGG  
AACCCACCGGTTGCCCCAAAGACGAAGGAGCAGGTTCCGCAGGCGCCGTATGCCT  
TTCCTAGCATGATGCCTCCGACAAGGACGGGTGGTTAAAAATGGTCGCGAGCGTAA  
CCTCGATTGCGCCTGAGTTGGCATTGCCAGTTGCCGAACCCGCAAAGGCAGTTCGGT  
ACTGTCGTGTGCTCACCGCAGAACAGGGCGTCTACTTCGTTGCGGAAAGCAAACGC  
GCCGTCGTGTGCTTACTTGCTGATGCGGACGGTCGTAGCGCCGAGCTTGTGGTGTGC  
AGCTCGCACAAAGACTGATCCGATTGTGTTGTCGATCTTTAATGTTCTGCGGCGGAAC

GCGCAGAACATTACTTGGGTGACACGCTACACGCAGGTATCAGAAATCGCGAAGCT  
TTATCAGCTGCACTCTACCAACCTCGTTGCTAGCGACGATGATTCAGCCAGGCAGGA  
CCAAGTCAAGGGATACATCCGAGAGGCCAATAGCATGGGCGCTTCGGATCTGAAAA  
TCATTGTTGTAGGACCGTATTGCCGAATTAGGTACACGATTCACGGTAGGACAAAGA  
CTTACCACGAGCTACCGGCTGCTGAAGGTATGCTGCTCTCGCGTGCACTGTACAACA  
CGATGTGCGCAGAGATGACAGGCTCCGGTCTTGATCCCAACGCGATGCAAGACGCT  
CAGTTGAAGGCTGATGTGGCCAGCCAATGTGGCTTAGTCGGCTCACGTATTTTCGACA  
CGTCCAGCCAATGGTCGAGGTATCCGAATCGTGCTGCGCTTGCTGCCGCCAAATCGG  
TCTGCAGTCCAGGAGCTCGAAGATCTCGGTTACCTCCCTGACAGCCAAATCCCCATT  
CTACGGGAAGTGATGTCTTTACCCTTCGGCATCGGGCTGATTTCCGGAGTTACAGGC  
TCCGGGAAATCCACCACGCTTAAGGCAATCATCGAGAACATCTTGCGTGATAGCGA  
CCAGGAAACGGATGTACTTACGATTGAAGATCCTGTTGAGTATGACATTGAGGCAG  
AGGGCTGCACCCAAACACCGCTCGTCTACGAACAGGACGACCCCGAGGGGCGGGCGC  
AATGCATGGCCCAACGCGCTGCGTAACGCAATGCGCCAAGCGCCAAAAATCATCGT  
GCCGGGGGAAATTCGTGATTCGGAGTCCGCTCTGATCGGTTATGAAGCGGCCGTAAC  
AGGTCACTTCATTTGGTCCACGGTGACACCTTCGATGCTCCGAGCATCATCGATCG  
CTTCCGCCTCCTGGGTGTTGCAGATGACCGTCTGTTCAATCCTGCACTTACCGTTTGC  
CTTGTCAACCAATCCTTGCTGCCGCAACTCTGCGTTTCCTGCAGGGTTCCCTACCTCG  
TTGGGAGCGCAGCTATCCCGGCACATGTACGCACAAGCATTGAGGAGTTTTTGCATG  
TCAGCAAAGTCTACTTGCAGGGACCAGGCTGCGACGATTGCTCCGGCCAAACACCG  
GGCGTGCGTGGTCGTAAGGTGGCTGCTGAGATCATCAGACCGACTGCAGCGTTCATG  
GAGGTCTTCAGGCGACAGGGAATGGTTGCTGCACGAATTTATTGGGTCAAACAGAT  
GGGCGGCATAACCAAACCTCGCTCACGCGCTGACCTACGTGCATTCCGGCCTGGCAG  
ATCCACGTCATGTGATCAGAGACGTGGCCGCGCTCAACACTGATCGCTTACATATCG  
GAGAATGAGATGGCATTAGCCGATATTTGGGATTTCGCTCTCGTTCGACGGGATAAAG  
AGTTGGGTATTTAAGTGCTATGTGAAGCTCGGCTTTGGCATGACAGCGCGGATCAAC  
TTCTACGAGTCTCTGACTCTTTTCGCTCGACAACGGTGAGAGCGTTCTGGACACCCTT  
GAACAGCAGCGAGCTGCCTTTGATGAAGACGGAATTGCGGTACTGCCTGCGCCTCA  
GCTGGTGATCATCAATGACTGTATTTCGTGCTCTGACGCGTGGTGACCAATTGGCTGA  
CGCGCTCGAAGAGTGGGTTGGTATTCAAGAGGTCTCACTGGTCGCAGCAGGTGAGT  
CGTCAGGTGACTTAGTGGCTGGTTTGGACCGCGTTGTGGAATCACTGGAGCGCAGGC  
AAGAGCTTCAACGTGTGCTGAAGGAAGCTCTGATGTGGCCGGCATTCAATTGGCCTAG  
GTATCGTATCTGCGATCTTTTACATATCGCTGGAGCTGATTTCCCGAGCTACTACGGAT  
GCAGCCAAAGGAGGCCTGGCCGGCACCGACTCAGAAGATGATAACGATAGGGCTCT  
TTGTCGTCGGAAATTGGTTTTACATGCTCACAGCATTTTAAATTGCTGCTAGTTGGCT  
TGCCTGGGCCCTCCCTAATCTGACGGGCCGCATACGAGACAAATTCGACAAGCTGCC  
TTTTTTTTTCGACGTATCGTGTGTTTGTGTTGAACCACATTTCTACTCAATGTGTGCGC  
TTGCTGGCGGCCGGAATCCCGCTTGAGCAGGCACTGATCGACATGGCGCGGTACGC  
TAATGCATATCTGCGCGAACGCATAGACGACACCTTACGCGGCATCAAACTGGTG  
CCAACTTTGGCCAAGCCCTGCACTTCACTGAGCATGACTTTCCTGATAAGGACACCG

TCAGAAACGTCAAAACATTGGCTGAAAAAAGGGCTTTGAGGTCGCGCTAGAGAAA  
TTCAC TAAGCGCTGGCTCAAGCAAAACATGAAGCTGATGGAAAGATCAGCCGCAAT  
TTTGCGCCTGATCATGCTGCTGATCGGAGCTTATGTAATCGTAACGATGTTCCAAGG  
CGTTTACGGTATCGCGCAGCGACGTTAACCACATCTTTCTTTATATTCTAAACGGAG  
ACAACAATGAAGCGTTATCGCAATTTCTCATTCCGGCGTAGCCAAGTCGGTGTATCA  
CTCGTTGAGTTGGTGATCGGCATGGTCATTCTCGGCGCGATCGTTATTGCCATCCTTG  
GTGTTGCACGCGGTGCACGCGGTTTCGTCCAAGGTGCAGACGGAGAGCCAAAATTAC  
AACGCGCTCATTGAGTGCGCCCGCAACATGAAGTCGGCGGGAACGTACGGAGCGAG  
CGGCACCAATTTGCTGCCCCGCTGCGATCAACCGCCAGTGTATCCCGACCACTATGCC  
GGTTACCGGTACGACTGTTTCTAATCAGTTCGGCGGCGCAGTTACCTTGGTTTCAACT  
GGGACCGGTTTCATTTTCAGCACAGCAGCGATTCCACGGAAGTCTGCGGTGGCATT  
GCGACAGACCTATCGCAGTCTGGGGCATACAGCACGAAGATCAATGGCGGGACTGG  
CATCACCGGGCCCGGTGACGGTTGCCCAAGCAGATGCTGGTTGCAGTTCGGATGCCA  
ACACGATCGCTTGGACGATCTCCAATAAGCCGCGAGTCAGTTGAATGCAGCTCAA  
AGACCTGCTTGTCTGTCGACATCTATCTGGGTCACGACTATAGCCTCATGAAGGATCT  
GCCGGGCGCGCAAGCGCCCGCAGTGCCGCGCCCGAAGAGCTCAAGCATGAGCTGG  
CGAACGTAAGAGGCCAATGCCTAGAAATGTTTGAGAGGTCAGGCGATCCTGAATTT  
GCATTGAGCTTAGATGGCTTTGTGTACCGTGTGACAACATTTGTTGATACCAGCACA  
CATCCAGTGTTTGTGCTCTCTCGCGCGGCAAGCAAGGTTATTCCGATTGAACGATTG  
GATATCCCTAAGCATGCTAAGGAGGCTGCGCTTTCCCCTAGGACAAGGGGCATCGTT  
CTAGTGACAGGAGAGATGGGGTCTGGGAAGACAGTGACCGCGACAACGCTGTTCGT  
AGAGCGTCTACGACAGACTAAATCAATCGGCCTCGCCCTTGAAGATCCCATTGAATC  
GAACCTCAACGGGGCCGCACGGGGACGGCTGGTGTATCCATGTCCAAGTCTCGCGAA  
GAGAGGGGGGATACCGCGAGTATCTGATTAGATCGATGCGTTCACGTGCAGAAACA  
ATCTATCTCGGAGAACTCCGCGATGAATCCTCGGCAGAGCAGGCGGTGCAGCTGAG  
CAACATGGGCCACTTGGTGTTTACCACAGTGCATGGTGGTGATTTGCCGCGAGGCGAT  
CGAGCGGATTCTGTCTTTGTCTAGGGGCTTACGCGATCCATCTGGCATGTTGGCCGA  
AGGCTTGGCAGTAATCATTACCAAAAAGCTAGTGCATTCGACGGCTCTGCCTGGCGG  
CACCTCAATACCTCGCTTGGTTGCAAAGGCGTTAACGCTTGTGCCGGCATAACGGAGA  
CGAGCGCGGCGAGGCTTTTTCGAAATCGGCCAGAGCTCTGATTTCGTACCAATGAGCT  
CTCAAAGTTACAAACACTTATTGAGCAGCAATCCAACGCGGCAACATGGAGGGGTA  
ACCCATGAGGATGAAGCACCGCGGTTTTGTATTGATGGAAGTAGTGATCGCGCTGGC  
GATCTTGGCCGCGCTAAGCATTGGCCTCATCTCGGTGATACGATCCCAGGCACAGTC  
AAAGCAGTTGGCCATCGCCGCGAATCAGCTAGTCGACTTCACAAACGCAACCGAAC  
AGTACGTCAAGAATGAGTACAGCACGATTCTAAGTTCGGCCGGCTCAACAAACCCG  
GTGGTGATCAATGTTGCCAACCTGCAGGCCGCTGGCTTGCTGCCGGCCAGTTATCCT  
TCTGCCAATGTTTTCGGCCAGGTGCCGACAGGTCGGTCCCGGAAGGCGTCGGCCAAC  
ACGCTGGAGACGCTTGTGATCTACAGCGGAGGCGTAGCGTTATCCCAATCAGACTTA  
GACGAGCTCGCCGGATTGGCGGCGCAACAAGGCGTGGCCGGTGGATCGGTTGGGTC  
TGTGGATACCACGCGTGCCGTGCGTTTCCTCGGGGCGTGGTCCATGCCCCTGTCCAA

TTTCGCTATTTTCGCCAGGTGCCGGGCGAGCTGCGGCAAATGTGAGCTATACCAACGA  
AGCGCGATCGGATACTGCACTCCACCGACAGGCCATACCTGGACGGCCGGAGCTCA  
ATCGCATGAGCACGTCAATTGATATGGCGAACAACAACATCGACAACGGTGGACAA  
ATTGCCGCGCAGAATGTTGACGCGGCGAATGGTATGCAAGCTAACCAGATCGCGAT  
CGGTAAAAGCGTCTTTGGGGCTTTGCCATATGCCTACGAAACGGTGCAGATTAATTC  
CGGGCTGACGTTTCGCGTCGCTGCCGGAACCAAGGAGCTTGCTGCTTTACAGGCCGA  
TGGCAGCTCTATTTTCGCGGCAATCTTTATGCAGACAGCGTTAATGCAACAGGTAT  
AAGCCGTGCTGCTGACCTCATCGCCTCAAACACTGTGCAAGGCCAGGATGTATTTGC  
GAATAATTGGTTTCGCAGCCGCGGTAACGGTGGTTGGTACTCAGAGCAGTACGGTG  
GTGGGTGGCACATGACAGATACCACATGGATCCGGGCATACGGCGATAAGAACATC  
TACACAGGGGGGTGAGATACGAGGTGGTGCTGTTACTGCGGAGGGACGTCTACAGGC  
TAACGAATTGAAGTTAAACCGAATTGAATCGGAAGGAGCCTCCTGCTCTGAAACCG  
GACTGAACGCACGAAGCAGTCAGGGTGCTTTGTTGAGCTGCACGCTTGGACAATGG  
CGGAGCGGGGGCGGGATTAGCACCACAATAGTGACCGGCGCACGATCTGCAGGCTG  
CAGCCTTTCTTCGTATGCAACCTGTCCGGTCGGAACACTCGTTGTAAGCGGCGGCTA  
TATGTGGAATCAGAACTGTAACGGCAAAGAGGAATATCAGTTCACATCGTTTGATA  
GGCCGTGGGGAAACGCAGGTTGGGAGGCGCGCGTCCAACAGGCTTTGGTGACAGCC  
TACGCAATCTGCGTTCCATATTGAGAGGGATAAACCTATGTTCAACATTGCTGTGAC  
GGGCTTTTTTTTTCTCGCTGCTCGTTACGCTGTGATGGGAAGCGCTGCACTTTCGCAG  
CAGCGGGCCATGTTTCGGCGAGGCTGCAGTCATTGCGCAGAGCATCGCGCTTTACGGT  
GTCAAGGTCGCCAATTACCGCATGGCGAATACGACATTTAGCGGTAGCGCTTCAGAC  
TCCGTCCTTAATTTGCCTGCGTATTACGTCAAGTTTCCCGGTACCGGTAACACGATTT  
CGGGAGGGCGTTTCATATATCTACATGGCGGGCGTAGAGCGTGGGATCAGAGGGTAC  
GTGTATCGAAACCTGGATAAGTCTGGCGCGACCACTGGCTACGCCGCCGGCGGCCG  
TTTGGTCAGTGCTGGTGGTGCAGATCAGGGCGCGCTGCCGGCAGGGATACCGTCCG  
GCTCGGTAGTTCTGGTTCTCTGACTCGAGTGAGCGACTGGAGTGAGTGTGTGGGCTT  
CTGTGGGGGGTGGGACTGGTCCGAGTGCTCTTGGTCAGCTGGCTAGCTCTATGGGTG  
CTTGCCAATCCGATTCCCTCATGGCAGGATAATCGTGCGCCTAGCACGGGCTGCGGA  
GACAATCAATGAGCCTCAACGATTTTCATCGACGGTCAGCTGGTCAACAACAATCTCA  
ATCGTCGGGCGGTTGCTGAGACTGCTACTAACC GCGACGAATGGATGGCTGAGGCC  
AAGCGCCTGCGTAAAGAGCTTGAGGCCACGATCGCCGATCGGGACACCTGGAAAGC  
TCACGGTACTGCCTCGATCGAGCTCGTACGGGACTTGCGCGAGAATCTCGCGCAGTC  
TAGTCCAGCAAACCCATTTGCGGATAGAAACAGGCTTAACGAGCGGTTGAAGGCGC  
GCAAGGTGGAGCTGGTCCAGCAGATGGGCTACCAAGTCATCAATGCGGACGCAGAT  
AATTTACCATCACGCGCTGACTCAGAGGTTATCGCTTCGTGAATAAGGCTCCTTCT  
GGGGCCTTTCTTCGTTATATGCGCGTGGGCTCAGTGGCGTCGCTCGTTGTCGTCCTT  
CCCTAGACCCTCGCTCATCGATCTCGGACGGACGTCGCGACCTCTGCACGCCTGGCG  
AGGCGTGCAACGGGATATCAATCGTTTGTGCGCTTGTGTCTGGCGCAGCCTGGCATT  
TATCGACAGTGGGATCCGCAGCTCCTGCATTGACTGCCATTACATCAGTGTGGAACG  
TGACCGGCTCCTTGTTTCGATTTCGGATCTGCGCTTCTCGGTACCATCGGATTGTTCT

CAAAAGAAGGTGAGCTCGCGTTGGCGTGTTACGTTGGGTCAAGTTAGGTTGGGCCA  
AACAAAAAAGCCCCGATCGGGGCTTTTTTGT TTGGAATTGCTTTCCAGTTGGCTAAG  
TGCTTAGGCTCCGGGGAGCTTGGTTGAATGGACATCGTTTCCAGTGCCACCACCACC  
AGGCTCGCTGCCTCCCGTATTAACGGGTTTGCTCCCGCCACCGCCACCCCGCTGGG  
CTTATGCGAGCCGGTGCCCTTTGACACGGATTTCAGTGCTGCGGAAAAAGGCGCCCTT  
GACACCATGTTCTCGTTGTCGGCGATGCCGTGCATACCGACCGCAGAGCCGATCCA  
GCGCAACACGTTGTCCGGGATCCAGTTGATGAAACCGAACACTGAATGCAACACGA  
TCGTCATTAGGATCGCGTAAATGGTTGTATACGCGATCAATGCACCGATTGCGTTTCG  
CTGAGTTGCCCATCGCCCCCTGGACTTGCGTGATGTATGTAAGGTTGACGTAGTGTG  
CGACCGGTTGCGCGACGACGATGGAACCAACAAGGCCGAAGATCATCAGCGTCGGC  
CGCAGGAACACGGACAGAATGATCATGTAGCCAGGGCCGGCGCGTCCGACCTGGTC  
ATCGCCATCGGGATGCACATGGGCTGCTGCCCAGATTGGTGCGGCAATCACAGACT  
CGAAGAGCACGGTCAACCACTTGATGATCCCGGTAATCCAGATGATGTAGGGAATC  
ATTGGTACGTAGAACGCCAGAAATGCGCCGGCGGTTAGCAGTGTCATGAACAAGAA  
TGCGACGGCGGGCGTCAATGTCTCGATGCTGGCACCGATGTCGTAACCTCCCATGGT  
GATCGCATCGTCCCACAGGCCGCCGCCGAATCCGGCAACAATGAATTGCGCGCCTT  
GGATGGTCCACGCGACGGCCATGATCGTGTCTCCACATTCTTCATCTGTGCAACGT  
GGGATAGATTGCTTCCTGCAATTTCTTGAGTCATCTGGTTGATGCCAGCCAGCGCCG  
GACGTGACAACCAGATCTTCATTTCTTCGAAATTGGAGGGGATCTTGTCGCCAGTAA  
AACCAATAGCTTGGTTTTTGGGCCTCATACGCTCGGTACGCAGATTGAGAGCTGTTGC  
GGATGTACTCGTTTGCCGTGACAAGCGAGTCCTGGTAGAGGATCAGTGTGTCCGCGG  
CTTCCTTATCGGTGATTGTTTGCGCGCTCGATGCCGGCAGCGAGTTGACCGCCGATT  
GGATCGCGTCGCTCATGTGGATAAGGTGATTGTAGTAGGTTCCAGCAAAGATCCAGC  
CACCTCTTTTCGCATACGTGATGAATCGACTGTTTCTATTTTGGTTAGCTCGGTTAAC  
GACGCTAAGTGCCGCTGCTTGCAGTGACAGTTCGTAGGTGTTGGCAACTCGTTTCGAG  
CGCGCCAGCTGCAGGCTTTTCACCTGCAACGATTGCTTGCGCGACAGGACGCAGTTC  
AGTGACCATCTTTTGGACGGCCTGTGCTTGAGCGCGCAAGATCGGCGCTTTGTCAAT  
ATAGGGCGCGCCGTTGCTTTTCAGATGATTCGTGCGATTCTTGCCACTCCAGCTCGCC  
ACACACATTCGGATTCATATAGCCACCGGAGCCACAGCTGACCATTCAGGCCCGG  
TTACGCTGAAGGCAGCACCAGCCGCGCTTTGGGCGAGGTCGAGAAATCCTCCGGGA  
TACAGAATGTTGTGCAACTTGAGGGCATCGCCTGTGTTAATCATTGATGCCTTCTTCG  
GCAACACCTCGATTTTCAATGGTCTACCTTCAGTCTCGTACTGCTTGTTTCATTGCAGC  
AGCACAGATTTTCGTAGCGCAGGATATTGGCGGCAAGTGGCCGCGAATCCGGCAAGT  
GTGGGCGCCCCATTGCCCCTGTCTCCACCATCTTCTCGAGCATGGCCAACCACACTT  
GGTCTGCCAGACCGACGCCGTGAATTCCTATCCACAGCACTGCGATTTGGACCAACG  
AAAATCCTGATTTCAAAGGCAGTAAGAATGCGGTACCTGCTGCGGTACGCAATGGC  
ACCCATACCGATGACATTTTTTTTCCAAGGAATTCACCATCGTGGGCTGTATCAACA  
GCTCCTTTTATGGTGGTGAAGATCACGAACAGCATGCCCAGTGCAAGTATTCCAAGT  
CCAAAGACCTCGAACCCAGCCGCCAACGCTGTGTCTGATGAGGCTTGGTCCACGCTC  
TGGCCGGACATGATCGTATCCACGATCGAACCGAACACGTCGCGGACGAAAGAAAT

GCTTGTGTCATCTGCCGGCGGCTTGAAGAAACCCGGCTTGGAGGGATCTTGCGCGCG  
CGCAAGGTCAGGAATGATCAGTGCACCCAGCACCGCAAGCGAGCGTTTCATGGAGT  
AGCTCCAGGTGAGGGCGTGGTGTCTCGGAAGTACCGCCGCGACTTGGGCACGACG  
GGGCATGGGAATGGGAAGCCGGTGTGTGTGGGCGTCTTCACGGATGGTTGTTAGGT  
GTGTGGTCAGTCGGCTGGCCAAATCCTGCCAACGCGGCACAGCAGGAGCTGCAGTT  
GTAATGGCGACAGGATCTCCTGACGCTGGCTGCGGGACAGAACTTGGCGCCTGTTTT  
GGGCGCGCCTTGATGTGCGACAAGCGACGCAACATGTGGAGGTCTCGAATTGGGGC  
CCAGCCGGGTCTCGGCGGCGTGGGCGCTAGCCAAATTGTACGGAGCGCCACAAACG  
ATGTTAACTGAGGCACAACATATAGTGACGGATGTGACATGGCGGCGCTAGACCT  
CGCACCCCCAAATCTCGTCGAGTTCTGGCGCAGCTATGACCCGGGCCTTGGGGACTT  
GGTTAGCGTCATGGATCGGGCGGAGAACTGGACCGTGGATCGGGAGCCACATTTAG  
GCGAGCGCTTGGTAGCGCTGGGGCGCCGGATGACGGGGCCGGAGCAGGCTCGTGCG  
TTCGTTTCGGCTGACGCGCCTGATCTGCTCCTATTTTTGGCCTACATCTCCACTAGCA  
GGGCTCTACGCGTCATCCATTGGTTGGACGAGCAGGATGAGTATCACCAGTACGGCT  
CCACGGTTGTCCAGCGGTTACTGGATGCTCCCGGCCACTTGGAGGGAGCGATTGCTC  
TTTCGCCGTTACGAGACCTTTTGGCTCTCCGTCTGCGCGTAATCAGCAATACGCCCTA  
TTTCACCAAGCTTTTCGCTCCAGAGCGCCTTGCCGGGCTCGGGGCTGCGATTACCCG  
CTACCGCCAGGAGGCTGTCGATGTCTCGTAAAATTGCCCTTGCGCCCTTACTGGGCG  
CGTTGCTACTCACTAGCGGAACCGCGTCAGCTATCGATGCCGCATCCGTACAAGCTT  
ACTGCGACCAAGTTCGGCAGTCCGCTCAACAAGCCAAGCAGCGACACGTGCAGATC  
TTTGCTCCAAGGCAGGATCCGGGGAAGACATTCGACGATGCCACCCAGTCGTGTTTG  
GACGGCATTATGTCTTACAAGTCGATGTTCCAGTTCAAAATGCCTTCGCTTGGCGAC  
GTGCAGGGAATCCTGAGCCAGATGGCGAAGGAGATGCTCAACAAGCAGTGTCAAGC  
CGCGCGCGCACAGTTTGACCGTGCTGTCCAAGACGCCGTTTCAACCGTTAACCAATC  
CACCAATCAGTTGCCAGGCGTAGATGTGGACGTCTCCACTGGCAGCGGCGTGACAG  
TCAAGCCGAAAGACGGCGATTTCGACCATTTGGGGCTCGATCGTGAACAAGCTTGGA  
GGCGACAAATAATGCTGCTTCTTCGCCGGTTCACCGCACTCATTTTTTCCTTGCTGGT  
GCTGGGTACCTCGACGCTGCTCATTTTCTCTGCATCCACAGAGTCGACAGCTTGTTGC  
GGTGACGGCGTGGTGGCAGCCGCCGGAGCAGAGGCCCGCAGGCGCGTCGGTTGTAAC  
TGCGGTTGGGTCAGCTACCACCAGCATCATCACGCAGCTGCAGTTGATGGACCAA  
ACGTGTCCAGCGGCTTCGGACGACTGTACGAAGAGCTTGCCAAGCAAACCGCCGCC  
CAGCGCACCTTTGAGCAAGGTGCGATTTGCGGCGCAAACCCAGATGTATATGGAGGA  
GCGTCGCGCCGAGGCCGAAGAAAAGTACGCACTTTTCGCCGCGTGCGTGTTTCGAGA  
CCGCAAGTGGCGTCGCTAGTACGGTTGCCGCCGGCGAGACAAAAGAAGCAGTCAAC  
GATCTGAATCGCTTGATGACCGATCGCACGCTCAATACGCCAAACACTGCCGCCGCG  
ATTGGCAGGATCTACAAGGATCACGCTGAGAAGTACTGTTTCGGCTCGGGATGCCCA  
GCTAGGGCGCTGCACAGCAGTCGCTGCTGAATTACAGAACGCCGACGTGCGGGCTG  
ACGTCTTGCTGGGCTCTGCGAGCCTGACGCCCCGCGCAGTCGGATGCAGCGAAAGCT  
CTGGTCGCGAACATCGTCAATCCGATCCCTACGCAAAACATCCCCACGAAATGGGA  
GAACACTGCGCAGGGTAGAGCATTTGTTTCAGGGCAATTGTTGGAACAGGCCCCGCA

CCTCTGTGGCGGCGAACTCGCTCAATCAAGCCGTCGCGGCGCGCACGAGAATTCCC  
GGTCTCGGGTCTGCCGCGATGCTAAACCGGGCAGACGTGTCCGAGCGGGAGATGAT  
GGAGGCGCAGGTGCGGGGCAGGTTTGAGTCGCCCCACTGGTACAAGATGCTGGCCG  
CCATGAGCACAGAGAACTTGTTGCGGGAAGTGAACAAGCAGTCTGCTTTCGGCTTGT  
GGATGGACTACAGAGAGTTCTCTCAGATGGAGCGCATCGAATCGCTACTGGCGACA  
GATCTAGCCGTTACGGTTAAACAGGACAGCGAAAAGCGGCTGCAACAAGCTCGCTC  
GGCTGCCGCAAAGGCGCGCTGATGAGGCCCTCCAAGGCTGCAGTCATTATCGGAAT  
CAGCGGGCTTCTTGCTGCTCTGCCTTACATGAAGGCCAGCGCGGGCGTATTGCTGTGA  
CCCGTGGGGTATACCGGGGAAAAGTGCATTCGCCGCGAGCTGGATCCAGCGTTGTTGG  
TGCCATAACCGCACAGGTCAGTGCCTATCCAAGTACCTGCAGCTCTATACGTCGCA  
GACCTGGAGCAGCGGGCGTTGCTAAGACAGCTGAGGAACTGAGCAAGCAGACCGCG  
GCCAGCAGAACGTTTGAGCAAGGTCGCATCGCAGCCGACACGAGCCTGTACATGAC  
AGGCGTGTGAGGCGATGCGGAAGAGCAGGCGCAGGAGCCTGCGTTGCTCGATCAGA  
CTGTACTAATGCCGTCCTGCTCTCGGAACAATTTAGTCAGCAGAAAAACAACCGTC  
GGCGGGACGATGCGGGGCTTGCCGAGTATATGCGAGGCGATTTGCACGAGGACCTC  
GTTTCGCGAGGTCGTGAATTTTGTGATCTGCGCGGGAAAGCTGCCGGATTTTGCGAT  
GCCATCGCGTCCTCTACGCTACAGAACGCAGATATTTTCGTTCAACACTATTAGCAAT  
CCAGGTGACGGGCAGTACGAAACGCTCACAGATGCTGAAGCTAGGGGCTGCGCGTGC  
TTTTGTGCGCAATGTCGTCGCTGCTACACCAACGGCAACTACAGCAGGTTGACGGC  
GCAGGATGAGTATCACGAAGGGCTACTCCTGGCTGACCAGGCCGTCTTGTCTCTTGC  
TGCGCACAGTCTTCACAGCGTCATGCAAAATCGCGTTTCGTAAAAGGGATAACGCGC  
AATGATGATTTCGATTCTCGCATTCGCACTTTTCTTCATTGTCAGTTGCGGTGAAACC  
GCTCAGGCAGCTGCCTTCGATATGGCAGACGTCATTCGCGACTCTGCGGCCAAATAT  
GCAGCTACGCAGAAGGTCGATGCCGGCAGCGCAGTAAAGCGAATGGACGATCTTCT  
AGTACGTGACTATGGTGCCCCGGGGACGCATAGCGAGTGAGCACGATCCGCGGCTGA  
AATCTTTGTACACGCAGGCCGCCAGATTGCTGATGAACGGCAATGCAATTTCTGGTG  
GCACATTGATTGTCATTGCTTCCCAAGAATCTGGGTACAGCGGGAGCAAGGTTGGCC  
CAGCTCTGCAGGCGTTTATTGGCGCAATGCTGATGCCCGCTGACGAGGAAGACATG  
GTCCTGCGCGAGTTCACCGCGCGAGCCGACAAGGCGCGATCAAACTCGGCGTTTT  
GCGTCCCGAGCTCCAGATGGCCGCGCAGCTCCGTGTGATGGGCGCGATCTATCATGA  
TCCGGTAGCAGTTGATGCCGGTGTTGTTGCACTCGATATGCTATCTGCAACTGCAGA  
CGAGGAGGGTGCCGTCGCAGGCGCGTTAGCTGCTGCGGGTGCCAAGTGAAGGAGGC  
CAGGACAAGCCGAGTCGGTGCTCAAACAGCAGCTCAGGGCGGGCGGAAATCCAGTT  
TGCGCCCGATTGCGATTCTTGCCCTTCTCGACCTTTCTGTGGGCGGGCGAGTTCGGCGG  
CGCAGGCTGATTGCCTCACCGTACCAGCACCTTCCGGATTGGTTACCTCGGTTTACG  
GCTGGCGTTTCCATCCTGTCTTCAAGTATTGGCGGCCACATCGCGGCGTTGACCTTCG  
TGCCGGGGTTCGGCACGCAACTCGTTGCCACGCACAGCGGTGTCATTAGGTGTCGA  
ATTCGGCAGGCGGTGGCAATGAGATCCGCATCGTCGGTGACAACGGCTGGGTAACC  
AGGTATCTCCATTTGACCAGGCCGCTGGTGGCGCCTGGCACCAAAGTGAGCGCGGG  
CCAGGCGGTGGCACTGTCTGGCAACACCGGCCATGCTTCCGCAGCACCTCACCTGCA

TCTTGAGCTGTACGGGAAGGAAGGCAAGGATCTGAACCCCGAGCCGTTGCTGTGCC  
CCTCGCCGTCGCGCAAGCCCGGCGCAGATGTATCCAATGGCTTTCCGGTCTCGGCGT  
GCAATCCGAAGGGGGGAGCTGCTCATCGGCTGGTGTGCCTCCTGCGAACGGTGGA  
GGACCAGTCGCGGGGGAGGGTCAGGCACCCCTGCCACGGGCTACCAGGGGACCGA  
GCCTGCATCGCCGGCGCCGAACATCACTCAGTTCGACGACATGTCTACGCACGAAAT  
CCTCAGCAGCGAGATCATCAAGAGACACGGCAATCCAGATTGGTATCGGCTCGAAT  
CAGAACGGGGTTCGGTGGCATTGCTGACGGAACAGGCGCAGATGCGTGCGCTGCGC  
CTGTATATGCGCTACCTGAACAAGGAGTCGCGTGACCGAGTCGAGGCGCTGTTGGC  
GGCGAAGGTACAGAGGCGTGTCCAGGCGGATGCCAGTGAGCGACTGCGCCGGCAGC  
GCGAGGCGGCGGCCAAGGCGGGGCCTCCTTGAATAGCGATAGACACGCCACGGCGA  
TTTGTATAAAAATAGCCCTCATATACCAATGAGAGTGGCGCAGACATGAGCAAGCT  
CGGTGCATTGCGTGAGAAGGCTGTTGCGGAGGGGTGCGCTGTCTCCAGCGTGGAAG  
AGGAGGTCCCGCCTTTGCCGCCCCGAAGCGCCCATGGATGCCGAGTTTATTGCAGGTT  
TGATGGCGGGCGCCGCCGGTGCCGCCGGTATTCCCGATCGCCCGCCCGAAGCGTTTG  
CGGACGTTGCAGTCGCCCCACGGGGGATGGTGCCCCGCAGGGCAACCAAGCCCCT  
GCAGGTGCCAGCAGTCCACCCGCTGGGCACGCTGTGCCGCAGGGCGGTGAGCCGCA  
TGCCGAGGCCCCCAGCGCACCCACAGGCCGGGATGGACACGTCGGACCTGCTGCATG  
CATTGAAGGGTGCGATCGAGCGTCTCGGCCCGGCTCGAACCCAAGCAGAGGTCCTC  
GCCGCTCCCGACGCGCAAGGTGCATGGGGGGAGGTGCGTGGAATTGACCGCTGCAGC  
GCTTGCTTTGGGCATGGCGTCGCCTGTCGAGCAGCTATTCCGGCGCTACGGTGCGCC  
TGGGGAGGGACTGCTGAATGCCGCGCAGCTGAAGGCGCCATTGAATATGGCGGTGG  
CTGGGTTCAAGCCGGGGGGCTGCGCCGCTGGCGGGCCACTCAGGCGAAAGCTGCGGCC  
GCAGCCGCCGGTCAACAAGCCATGGGCGGACCTGGCGGTGGCGGTGGCGGTGGCGG  
TGGCGCGGGCAGCGTCGGCGCAGCGCTTGCCAAGCTCGTAGCTGCACCCGTCACCCT  
TCCCATGGCGGCCCGGCAGCCGTGTGTGGCAGCTGATGCAGACCCGCTTCGGGCCGC  
GGCCCAAAGTGCAGCCTGGCGTTGACGGCTTCAGCGTGATTTCGGCAGCAGTTCGATG  
ATGCCGCCGGTCGAGCCATTGATCAGATCGCCCACCTGCGCTCAGGCCCGATGAAG  
CCTTTCCTAACCGAGATGTGCGCAGGATCCGCTGCGTCCGTCCGAGCAGCTGCGCCGC  
ATGCAAGGGGACAAGAAGGGCACGTATTTTCGAGCGAGCTAAGCAGCTTCGCGAGCT  
TTCTGCCCAGCCGGAAGTGCAGGGTCAATAACAAGAAGCTCAACGACGCGATGGAGC  
ACCTCCAGTACAGGAGCCGACGCCTGGCCGAATACGGGCACGAGGCTGGCATGGAT  
GTGGAGGACGTCATCGGCGACAAGCTGGAATCCGTGTCCAAAGCCGGCGAGGGCAT  
TCCGATGACCGACGGCAAGGGCAAGCTGGCAGAGCTGCGCGAGTCGCTGGATGCGC  
TGATCGAGCGGATCCGCGAGTTCTTGCGCACGTTGTTTCGCAAGGCCCGGCGCGTCAC  
CGTGAGAGGCTCGACGTTGGCCGACTACCTCGGCGCCTGTGACCGGTACTTGTCCGG  
CCATGAGCAGCAGTTCACCAGCCCCTGGGGGCTGGTGCTGCTTGCCGAATGCGCAG  
CAGATGCGGGCGTCGACCTCAGCGAGGCGGACGTATCGCTTGATGCGGCCTTGGA  
CAGCTCGCCGAGCGAGTCGGCCTCAATCGTCAGGACGACCTGGCGTCCCTGCCAGC  
GCCGGGGCAATAGCGATGGCCGCATTTCGTAGAGGATCTGATCGTCATCGAGGCATC  
GGGCAAGCTGAAGCGGCTGTATGCCGTGCTATCTGACCTCGGCATGCGCGCACGGT

GTATCGCCACGCTTGGCAACCTCCTTCAGTCACCTCCGCAGTTGCGCCCCGGTCTCCA  
TCCAGAAGGACCCTGCCGGTGGATACCTAGAAGCTATCCGTATCCCCGCAAGGCCC  
GACGCCTATGACCGGGTGAGCTCCGAGATCCGGGCGCTGCGCGGACGTCTGTTTCATT  
GCAACCGATTATGACCAGGAAGGGCACGCCATCGCTGCTGACGTCGTTGCGCTGGC  
AAAACAATTGCGCCCAGATCTTGCGCCACTGAGGCTGCAGCTGACCGAGCTCTCACC  
GGCGGCCCTGAGCGCAAGCTTCGCGGGCGTCCGCGAATATGATCCGTCCTTAGCGCT  
TTCCGGAACGGCGCGGCGCATCGTCGATAGGGTCATCGCCTCCGCTTACTCGTTGCC  
GTCGGCAGGCGTTCTGGTTGGAAGAGTGACCAGTGCGATCGCTGCGATGGCACGCC  
GCGGGCTGGTGCCACCCACGAGGCCGTGCTGCAGATCCCATGTGCCAGCGGGGGA  
GTGCCATTCACTGCCCCGACGACGGTGATTGGAGAGTCCCGCCTGCAGGAGCTGCA  
GAGTGCAGCAAGTCAGGTCGTGTGCTTGGCGGTACGTCCACCGAGGTGTCAACGTT  
GGGGCAGGGCGTGTGTTACGCCGACTTCCTCGCCGGCATGAACGAACACATGGGAC  
TTGCTGAGGCAGCACGGCTGTTGCAAGACCTTTACGAACAAGGTGTCGTCAGCTACC  
CCAGAACGGAAAGCCGGGGATATGGCGCCCCGAGGCCATGCACGTTGTAACGAGTTT  
GCCCCGAGTCATGGGGCACGGTTGGGGCCCACGGCAGCAAGCTTGCTGCCCCGAGGG  
GGCGCATGAAGCGCTGCACATCGTGGAACCCACGGGTGCTGGCTGCGGTTGACGTGA  
TGAAGCCGGCACGTCTGCAGAGCAACCACAAGGCCATCGCGCTGAGCTGGTTGTCC  
CGTTCAATGGCGGAATCGGTATGGCAGGTACGGCGAGATTTGCCGGACCTCAACCA  
ACTTCCCGCCGCGCTGCGGGGACTGGACTGGAGCAGGGACATGGGAGCGATGCCGG  
CATGGCACCGGCGTCCTAAGGCCAACAGCCGTGTCCTCAGTCACCAGTCCGCGATCC  
TGGCCGGTCTTCAGGAGCAACGCATCGGCCGACCCAGTACGGTGGTCGGTCACGTC  
GTGAGGGCGCAGGAACGCGCTTTGGTGACGCCAGACGGAGGCGAAGGACCAGGTG  
GCACACGAGTCTTGGCCCGCGCGCCTCTGGGGCTACAGGAACCAGCATCGGCTCAC  
CGCATCGAGGCGGTCTGCCAGAAGGCAGCCGGCATAGGCCTTGGACCCGCGGTGGA  
GCAGGCGCTATCGATTGCCGCCGGCGACGAGGCGCAGTTGGCTAGCCTTCTGACAA  
CTATTGACGACTGGACGCCAGATGATGATTTACGCCTTCCTACGCCCCCTGAGCTC  
GTCGCAGTGGTGACATGGGCGCGTCGACACCGCTGGTTAGTGGCCACAACGGGCGT  
AGCGTTCTGCCTCTTAGCGTGGCTCAGCGTCGTGATCGACTCATCCAGAGCGCTGTC  
CCAGGCGGAGCTGGCCTCGCTCCGGCAGTTCGCCGAGCAGACCGGCGTGCCAGCGG  
TTGAAGCAAGGCTGAAGGAAGCAGAGCGCAACGGAGCGGTATCTCTCAGAGAGGC  
GCAGGCGGTGATCGAAGTAGCGAAGGCCTACGGGCCCCGAATACGGACTTGCGAGCG  
ACGCTCCCTGAAATCCTCCGAGGGTGAGTGCGTATTCTCGCGTCTTGGGACGTATTC  
CTGCGTCTTGCGATCGCCACAAACGTTGGGTAATATTGGAGCGTGATTCCACTTACG  
TTAGGTAATGCGCCTCGTGAATATCCAATCGTTTGACGCAGCTTCATATCGCGAGTT  
CGAGGGCATCATGCTCGAATTCGCCAAGGCGCAAGGGTGGGAATTCAGCTTTCAAG  
CGCAGCCGCTTCCGCTGGCCAGCGTGTTTAACAACGCAACCTTCGGCCCCGCTCTCC  
TGGTCGCCGCGCAGGCAGAGCTGTCCCTGCGCAAGATCGAGGTTGATCTCGGCCTG  
GTAGTTCAGGAAGACAACGGAGCTATGTTTGGCCGCCGCGTTGAGTTCGATCCGACT  
CGATCTCACCTGCTGACTCAGATGTGGCGGCTGACCCAGACGGCTTACCAAGTCGAC  
ATGCTTCCGCGGGAGCAAAACCGCATAGTCCTGGACCTGGTGCCAGCGGCACTGGA

GCCATACGAAGCCCCCGCACTGCAGGCCGGTCAGTAACATGGGGATGATTTCGTCTGA  
TTGATGACGGCCTCTGGTGAGGACGCTGGGTGCACTGCGGCCCGGAGCCGATCGC  
GGACCTGTCTCCGGAATCAATGACCGCTGAGGTAGGGCTGCAGGACGTCGAAGCGA  
CCACAGACGCGGCTCCCGCACCGCAGCTGACTCTTGAAGCAGAGCGTGGCGAGGCG  
GTGATGCCGCCGGCGCCGACACCTGTTAATGCACCGACCGGTGCTCAGCTCACCTG  
TCCATGCTGCGTGCAATGGGGCCCATCTTCCGCGCAGCGCTGGTCTACCCAGGGCCA  
ACGGCGCCCGCGGTGGAGTGGGCACAAGCCATCAAGGTCATGTCCGACGTGTCCGC  
TCAGGTGGCGGGCCAACTCGCGCTCATGCGGACCGAGGAACTCGACGTTGCGTGGG  
CCCGTCGGGAGCTGCACCCCGCCGTCGCTGTGATCGTAGGCGAGCACTGGCTACAC  
ACGGTGATCAAGATGCAACGGGTGCAGAGAGTCGGCGACATCAAGCTCAGCGCCGA  
AGACATACTGCCCCGGGATCGTGGCAGCGCTGAAGGCCTCCGACGACTGTGGCAATC  
CGCACCTGGCAACCGAGCGTTCACTGTTGCCGAGCTTCTGCCGGCGATAGCGTTGC  
TCCAGGTCAATGCGCAGGCATACCAGGCGCTTTTGCAGTCCGACACAGTCGATCTCG  
ATGTGCCGGATCTCTCCGTAGATGGGTATCTGCAAGCTGTCGCTGCGGCCGTTGTCG  
ACGCAGTTCAGACCCAGGACGCCAGGGCAAAGCTCAGTGGTGCTCTCCACGGTGAT  
GAGTTTCGGGAGGGCCCTCCTGAGGTCTGCAGCCGGCATCGTTGTCAAGGCCGGGGA  
GACTGCGGTGAACGAGAGTCTGGCCCGCTTGTCATGAGGCTATCAAGGCATCGGCGC  
CTGCCCCGCTGGCTCAGCGAAGAGCCGCTGCAGCATGGCTTCCCCCTTGGCCCGCACGG  
TGGAGTTGATCGAGCAGGGCATGAACCGCCTAGCAGGGACAGCGGTCTATATCGCC  
TCCAAGCTAGGGAGCAAGCGATGACAGAGGAAGTCCCGGCAAAGAAGATCCAGGC  
ACCTCGGGTCGATGTGACGCCAGCGCCAACCCGACGCAGGGCTATCGCCGGCGTCG  
CGCGCCTGGCGCGTATCGTCTACTTGGGGGATCTTGGTGAGATCCGGCGAACGCACG  
CGTACTTCCGCGATCGTCTGCAGAGGGTTCTGCACCAAGGGCGCTATGCGCGCAACG  
AAACGTTTCGAGGAAGCGCAGGCACGGCTCGGCCTCACGCCCCAGGACATCGCCCCGA  
CGCGCCGCTGAGCTGCGCAGTCAAAGCCTGCTGTACCTGGGCGTGGCCGGGGTGGC  
GCTGTTTGTCTTCCTGCTTTTGGCACTGGTGAACAATCCGATCAGCCACGCGGCGAT  
GAGTCTGCTGGTGATGGTGCTGGCCCTCAGCAAGTACTCCGTAAGCCGCTGGCGACA  
GGGGCAATGCGAAGAAAGAAATCTGGTGCCCTACATGTCCTACTGGCTGCGCTGGT  
GGAGGTCATGATGGACGCCGCACCGCCTCCACAGCTGACCGCCTGTGTGGCACATG  
CCGCAGGCACCTATGGTCTTGATCCCGACGCGCTCTGGGCGTTTCGTGCGCAGTCGCA  
AGGGTGCGTCTGCGCAGTACGTGCAGGCAGAGAATGGAACGATGGAGCTTGGGCTG  
GCGCGCATCCCAGCCGACGTTGCGCGACGGGCTGAAAGGCAGGGCTTCACCCTCCA  
GCAGGTCATGAGCGATGACTGCCTGAACGTCGGTCTGGCAGGGCTGATGATGGCCC  
AAGCAGGCATCAGCGCAAGTCGCGGTTCCAGTGACAGCGACTGCCTCGCTGGCGCG  
GCTCAGCGCTACCAACTGCCATTGCCGATCTTTAAAGCTGTCGTTGGCGAAGAAGGC  
GGCTGGCTCGGGCTGAAAAAGCCAAACAAGAACGGATCCTACGATTACGGTCCGGC  
GCAGATCAACAGCATCCACCTGGAAGAGCTGTCCAAGTACGGGGTCTCAGAATCAC  
AGTTGATGTGGGACCGCTGCGTGAACCTGCACGTGTCGGCGTACCGACTGCGATTTG  
AGATCAACCGCGCTGGCGATCTTTGGCGCGGCGTGGGCAATTACCATTCCAGGACG  
CCGTCACTCAGTAGTAGTTATGCAGAGCGCGTCCGCAGGCGGATGGCGGGTGCGAA

CGGAGGCCAGCGGTGAGAGGGCGCCCGAACTCCGAGCACGACAACGGGCCTGTGGT  
GGTCGTGCTAGGTGTGATCGTTGGAATTGGCCTGGCATGGCTCGTCGCTCACGAGCA  
GATCTCATGGCTGGTGATGTGGGTACGCCTGCTTGAAGCAAGACTGGTCTTCTTCGA  
CAAAGAGGGTCTGCAGATGGTGTACGACTGGGTTGCCAGCCGGCACCCACGCGACG  
TGAAAATCGGAGAGCTCTACAGTTCTGGCCAAGTCACCGGGTATTACCTGCGGTGGG  
TTGTTCTGATTGTGCTGTTGCCGATGTTTGGATGGATGTTCTGGCGGCACCCGGCGCG  
TTCCAGTGCGTATCGACAGGTCTATAGCATCATGAAGCTGGCGTGGTCACAGGTTCA  
CCTGTACCCGATGCTAAAGCCGATCCTGGAAATGAACTTGCTCACGGTGCCACTGGA  
CCATCCCATTCATGGGATGCGTGCAATTGCCACGTCGTTACGCGCGCCGCTACAAGAT  
GCTCCGGGAGATGAAGGACATTGCTCCCGATCATGATCGTAACGATCTCGACGTGAT  
CGACAGTAAGCAGGTATTGGTGCTCTCCCGTTGCAGGGAGGTATTTGCAAAGCAAAT  
TGGCAAGGAATGGGCCGGAATTGAGTCGCTGCGAGGCTATGAGCGCGACCTGCTAG  
TCGCATTGCTGTGCAGGCCGACGGAACGATCGAGGACGCTAACAAGAACACCCTG  
CAAATCATCCAGGAGCTGGCGATTGCTGCGTCAGCTGCTTTCAAGGCGAATGATCCT  
GGCTTGATTGATCGAAGAGGGCATCGGAGCTCGAAGCTCGGGTGATGCAGAGCAA  
AGTGGTGGCACGCGCCATCCGCGCTCATGGCTACAAGCGCACTGTTCTGATGGCCAT  
GTTGGAGGCCGGTCGCAAAGGCGGCGTGCTTCCCGCCGCGTGGTTCCGTTGGTTGAA  
GCCCCGTTGATCGTGTGACCTGGTACTGCCTGTGTGACATGGGCATCCAGCCCAGCTG  
TGTGGAGTCCGCCGGTGCGCGAGCGCAGTACCTCACCGAACGAGCGGCTGGCATCC  
CGGTACCAACTCCGATGATTGAGCCAGCAATAAATGGTTTGCGCGAATACTTGAACG  
AGGTGATCGATGTGCAAGTGGAAGATTAAGGCTGTCAAGGTCCCGGCGTCCGTGCG  
CAGGTTTATACCGGTGCTCGGTGCTGTGCGGATTGGTTCGAGCGGAAGCTTCGCCC  
GCTTTACAGTTTCGATGCGCGATCGCATCAGTCCGCCGGTGTCCTGTGTTGGTCAAAAA  
GGGCAGGGTCACCATCGCAGAATCAGTCCGTGCTGGCGGCCGCGTTCATATTCTGGA  
GGTCCAACCAAACCGGGGCGCACCCGCTTTCTACGATCCAGCTGCAGGCCAATGTGCT  
GCAGGTTGGTCCGAGCACTATCCCCTACGCCGACGCAGGGCTGGCCGCACTGGCCT  
ATGCTCAGGTGCGCAAGGCAGTCTTGCCGGCGACATGGTCGGCGTGATCCTGCGA  
CTCGTTGGCCTAATTGCCGTGGTGCTCATTCTGCGTTTGGCGACAGTGGCGCTAATC  
GGCAGCACGGCAGGGAACGCAGCCGGCGGCAGCAAGCTCGAAGGGGTGTCCGCCC  
AGATGGCGGCCGATCCGGGGTTCTCCCCGCCGTCGCCGGCACCGCAGCCTTTGCCCC  
GAGCTTCCGAGCTCTTCGGCGCTGCAGCGCCGGCGGGGTGCGGCGATCTTGCTGATC  
AGATCTACCAGCAGGCCCGTGCTGCCGCTGCGAAGACCGAGCATGCGACGATGCCG  
CCGCAGCCGAGCGTAAACGTGGAGGGGTTGGCCGGCTTCGGGCTTGAAGAAGGTGG  
TGATCAGGCAGGGCCGGGATGCGACCCGAATCTTGCGTTCAAGGTGGAGCAGTAAG  
TAGCCAGCCATGAGCATCCAGGGCGTCGACAAGCGGAATGAGATCTCGCGGGAACG  
GTTGATTGCGGACACGCGGCCGTTCTTCCCTGCGGCTTCTCGCTGGACTGGGTGCGCC  
ATTTGCGGTTGCCGTGGCCGGACTGGTGCTCTGTGTCATGGCCGTCTTCGTCCCGGC  
GCTGTCAGACGTTTGCTTGCTGGTGGGCCTTTTGTACGCGCTCATCCCTCGCCGTGGA  
GTAGAGGATGTTCCGTTCCGTGTTCCCACTACTCTGGCGGAGTTGATCCAAACGAG  
ATCGACTCGAAGACGGGCAAGCCGAAACGCGGGCGCGGAATTGCCTTCATGGGCAA

CCGTGGGCTAGACAATGCCGAATGCTGGGGCGCCGATACAGACGTCAAACGACATT  
GGTTCTTTTTGGGTTCTACCGGCGCAGGTAAAACCGAAGGGCTTGTGTCGATGTGCA  
TCAACGCTTTCATCTGGGTGAGTGGTCTGCTCTACACGGATGGGAAGGGCGATGTAA  
GCCTGTTTGGCAAGCTATTCTCATCAGCACGAATGTTCCGTCGCGAGGATGACTTCC  
TGCTGCTGAACTTCATGACCGGCAACGCCGATACGCAGCGAAAGCGCTCGGACAAG  
CTGAGCAACAACCTACAACCCGTTTGTGGACGGCAATGCTGCCTCCAAGACACAGTT  
GCTGGTCAACCTGATGGATTCGGGCGGGGACGGTAAGGGCGGAGACGTATGGAAGG  
GGCGTGCGATTTCCCTTCATCGCGACCGTCATGCCGGCCCTGATCGACAAACGAGACG  
CAGGCTCACTGCTCCTGCATGTCGGCCGGATCCGTGAGTACTTGCCGTTCTGAAGC  
TTCTCGAACTATTGCGTGACCCGGACGTATTGCAAGACAACAAGACGCGCATCAAC  
GCGTTTTTGTCTGACGTGCCCCGGCTATCGGGCGGACAAAGGCGAGCAGCAGGCAAA  
CACGTTCTTTGAACAGTACGGCTATCAACAAATGCAGTTCACGCGCATCTTGTCGTC  
GCTTGCTGACACGTACGGTCATATCTTCAAGACCGAGCAGGCCGAGATCGACATGC  
GCGATGTGGTGGTTAACCGTCGCATCCTGGTAACCCTGCTGCCGGCGCTGGAAAGCT  
CCCGGCCGGAGCTCGGCAATCTCGGCAAAATTGTAGTCGCCGGCGTAAAGGGCATG  
ATGGGCTCGAACCTGGGCAACATCGTGGAAGGCTCAAAACGGTCTGTTCTTGACGCC  
CGCGCTACCCATGCGCCACGCCGTTCTTACCATCTTTGACGAGCATGGCTACTAC  
CTGACCGAGGATACGGCCCTTATGTGGGCTCAGGCGCGGTGCTCGGGTTCTGGCTG  
ATTTCTGCAGGACAGGACCTGCAGGCGTATTTCCGGACGTCTGAAGGAAGAAACGAA  
AGCCATCCTTGGTAGCTCCAACACCAAGGTCATTGGGAAGGTTGAGGACCCACCG  
AGACCTGGGAGATGATCGAAGCAATGGGCGGCGAAGCGCTCATCAGCACGCTCAGC  
GACTATGACCTGGACGTTGACGGGGTGGCCGGTGGGTATATGGAAGGAACGTCCGT  
CAAGGTTGAGCGTGTCAAGCGCATCAACCTGCAGGATCTCCAGCGGCAGGTCGAGG  
GCGAAGTGCACATGCTCTTCGGCGGCGACATCATCCGCGGGCGAATCTTTTACGCTG  
ATCCGCCGTCCACCTCTGAATTCCGTCTCAACCATTTTCATCAAGGTGCTTCCGCCAA  
GCGCCGAGGGAATCTTGTCCCTCAAAATCGATGCGCGCAGATACATCGATCAGCTG  
CACGAACCTGAAATTGCCTTCGCGAACCAGCGCCCGGATGATCCCTATTTTTCTTAC  
GCGGCTGATTTGCTGCGGGCACCAGGGGTACAAAATAACAAGGGTAACCGGCAAGG  
AGCAGAGCTCGGGGTGTGTTTGCTTACAGGCTTCCAGACGACGCCGGTGATCAATCG  
GGGTGCTGTATCTGGTGGCGGCAGCGCCGGCGGTGGTCTCAATGCTCAGCCGCAGC  
CGCAGCCGCAGTCCGAGGAAGAGAACAGTGCAGTGGTGTCCGCGAGCTTGACTCAG  
CGTGTGGATGATGGCACTGCCGGTGAATATTTTCGATGCAGCGAACCTCGAAACGAC  
ATCCGTGTTTGCCGCGGTGAAGCCTTCGCCTGCAGTGCCTGGCCAGCCTGTCTTCAG  
TGCGGAAGAGTCGGCTCTGTATGCGGCCACGGCCGTCGCAGCATCATCATTGGTCTGA  
TGTAGCAGTGGCGAAGGACATCAGCTCATTGTTTCATGGACTCTCAAAATGGAGAGC  
CTGGACCGTTGGATATCGAGTACACGCACGCCGGCCTGACCGCACTTGGTCAGGCG  
CTCGGTGGAACGTGCGCTGCTGCCTCTGCAGCAGCTGACGCGATGATTATTACTGCA  
GCGGAAGCGACCTCATATCCGGCGCCGCCACGCCACCCAGTAGTGATGTAGCGAG  
CACTAAGATGCAAAGTGCGATGGATGAACTCGAAGCACTGCTCGGCAGTTCAGGAG  
CGCCGAATGAGCTTTGAACTGACCTCTCTCCGGCGGCGCGATCTTCTTAGGTCGATC

GCAAGCGGCATCGCTGCGATGGGGTCCGGTGCAGTAATGTCTCCCGTTTTTCGCGCGC  
AGCGGCTTTGTCATGCCGTATGGGCATGCAGACGCTTATACCTCCGCAACATTTTGG  
GCCCAGCCGCGGGTGTGCGTCTTCACCGACCCGCCAGCAACGAAACGGTGGATGC  
CTGCTACTGGCGCGATGGTCAGCTTGATAGCGCTGGATACATCCGGATCTGTGCGACT  
CTTGAGAGACGTCCAGGCCGGGCAGGCTGCAACGATCGACATGCGGCTGCTGAATC  
TGCTACGCGGTATGCAGGGTTGGGTTGAGGCGTCCTATGGCATCCGGGACCCCTATC  
AAGTCAATAGCGGATACAGAACACAAGCAACGAATAAGAGCACGGAGGGAGCTGC  
GCGGCACTCTTTGCACATGAAGGGCCAGGCCGTTGATGGCCTGCATCCCGGCCTACC  
GCTCGAATACACGGGAAACCTCTTCAAGGCCTTTCAAGGCGGGCGGGGTGGGGTTCT  
ATCTAAACAGCAAGAAATTTATTCACGCAGACGTAGGGAGTGTTTCGGCAATGGCGA  
GGTTGATCAATGCAGCGGTAGGTATTGCACTACTGCTGACAAGTGCGGTAGTGCAA  
AACGCCCAGGCGTCGGAAGCGCCCAAGCCGACGTTGGCCGAGCGCCATCTCATGGC  
GTCCGGCGTCAAGGTGACCCACCGATTCTGATTCTGTATCTGGGTTGCGCGCGATCGT  
TGCTGACAACGGCGCAGACAAGCGTCTGTTTTACGTCACCCCGGATGGCAAATCCCT  
GATCGCGGGACTGGTTTTTGACGAATCAGGGCGAAACGTCACCACGGAGGACATGG  
GGCGTGCGGGCATCTCGGCCAGTGGAACACGACTGCCGTCACACAATTGCAAGCA  
CAGAAGCTTTGGCAACGAGTTCAAGGTCTGAAATCGCTCAAGGATGGCAATCGCGG  
TGCCGATATTTACGTCTTCGTTGACCCACCTGTCAGTATTGTCATCGACTCATGAGC  
ATGGTTCGCCCCGTACATTGCAGCAGGCACGCTGCAGGTACGTTGGTTGCCAGTGGCC  
ATCCTCTCTTCGCGTAGTCCAGGCCTAGCTGAGGCGATGTATAAAGCACCTAATGTG  
GCGCAAGCAATCCAGTCCGTCTCGACCAATATGCTAAAGCCAGTGCCAGAGTCTGA  
GGCCATCCGCCTGCAATTGGCGCAGAATTTGCTTGCTATGCGTGACACCGGTCAAAC  
TGGCGTTCTCTCGTGTTTATCGGGTGGGCCAACGAGTGGTGATCAAGTCTGGCGT  
ACCGACGGATGCGGAGCTCGTAGCTCTCGCCGGCGGGCGCTAAGTAATCCGCAAGGA  
AGAACAATCGTAGTTTTTGAACCAGGGGAACACCATGCAAGTCGTCTCTCAGCAACG  
CCCATCCGTTGTCACCACACAGCTCTCGTCGCTGGATCTCGCTCAAGACTTCTACAA  
GCGGCATCAGCGTATCGACGTGGCGGACACTTTACTCAACGACTTGGCATACTCTA  
TGCCAGCGAGGCTTTGGGCGCCGACGAATGCGAAGCATTTGTCGAACGCATGGCGG  
AGGAGGAACACATGAAGGCCATCCGTCTAGACTTCTGCCATTGCTGCATGGCAGTCA  
ACGCAGCGTTGTATCTTGATGATCAGGGCGTCTATGAGGCCTTTCTACCGCTGCTGG  
ACCTGGACGACGAGGATGACGCACTCGCGGACATGAAGCGCTTTGTATTGCGCAAG  
CTGGGGGAAGACCACGAGGAGCTCGCGGCAGATGAGGGCGCGTTCCGAGCTCGTGT  
TCTCTTGGCGTTAAGTAGGATCTGAGCAGAGACGAACGGGCGTTGACGAGCCACTTT  
CGTTTGATATAGTCCCGGCCTAGAGGGTGATAAAAGTGGCACCCATCCCTGGTCCG  
AAGGAGAACGAAATGCAGACGAACCCAAACGAATTTACCTGGAAGGAAGCCCGCG  
AGATGGGCTTGATGCGGCACCAGCCGACATGGTGCCGACGAAGGTGAGCCGGAG  
GCCTGACATGGGTCTCCTGAGAACCCTTCGGGGTAGCCTAGCAGTCCCCACGCCACA  
GGCCGCCGCACCGGCGGCCTCTTCACATGTGTCCGGCCTCAGCCCAGCGTCTCGTCC  
GATATACGATCGGGCCGCGGAAGGCACCGGTATCTTTGTAAAGCACATCGAAGACG  
GTGTTTGCCCATGGCAGCAGCCTCAAAGCAAGCCACTTGAGTGGCCTCGGAACGAG

CTACGTGGCACGCCTTACCACGGATTCAATGCGATCGCCCTCGCTATGAGCGGGTAT  
GACGATCCCCGGTGGTGCACATTCGACCAAGCCGCCGCGAAAGGCTGGCGGGTACG  
CGCTGGTGAAAAGGCGACATCCATTTTCATGTGGAAGGTTTCAGGAAAAGGATACCG  
GCACGTTTCGACGATGACGGTGAGCCGATCACGCAGAAGTTTCCGCTCTTGTGCCGGT  
TCAAGATTTTCAACTTCGCCCAGATTTCCGGCCCCGGAACCGCACCAGCCGCATCAGC  
TGACCGACACCCAGGCGCGCAAGCTGGCCGAGCCGATCGTGGAACGGTTGGCATG  
ACTGTCACCGAGTCTGCAACTGAGCCTATGGGTACAACCCCGAGAGGGACTCGCT  
AGTTGTGCGTCCACGTATCGCCTATCCGTCCGAAAAGCATTACTGCGCCGCTCTGAT  
GAACGGGGTCTTGGCAGTCGCGGCGCATGAGGCAGTAATAGGCCTTGCTTTGCCCG  
CAGAAGCGGCGATGACTGATCACCAGCGTGCCCAGCGCGATTTGCGAGTGGAGATC  
GCGCGCTCGATGCTCGCGATGCGCACCGGCTTGCCGCTGTGCGCCGCCGGTGGCCGTC  
AAGGATGCAGCGATACTTACGCTACTACAGAGCGACAGGCGCGAGGTGTTTCAGAGC  
TGCAAAGGATGCGGAGAACATCATGCGGTACGCCTTGCGGTTCAATCCGGAAATCC  
TCCCGACACTGGAGGACGAGCATCGTGAGCAGATGAGCGCCGCGGTGCGCGAAGGT  
GCCCCAGAAATGGTGTGTGACCCGAATGAGTTCCAGTTTGGCCAGCAGAACTGCAG  
CAAGATCGCCCGAGGCCGTAGTGTTTCGGTGTTGCCACCATAAGGAGTCGCCATGCC  
TTTAACTTCGAAGAACGATCAGCTAGGCGCTTTGGACGTTGTTGCTAGTGAGCGCTC  
TGTCGGCGAAATTGTGCAGGATCTACACAAGAAGTGGGAGAACGTCCGTCTGCTCG  
TGCCTGAAAGAGCTACGGTGGTCGACCGGGTTCTTTTTCGACTGGCCAAGGCTCTAT  
TTCAGGACATGATTGTTGTCGCTGAGGGGCTGCCGGAGGACGACCTTGTCTGTGAGC  
AGTATGACCAGCTGCAGCGTCGATATCTATTGTCTGACGCCGAGGGCCGTCGATCGC  
TAGTGTCAGCAATTCGGCACCAGCACCTAATGCAGCCTGTGCAGGAGTCTGAGGAA  
GTGATGCCCCAAACCGCTTTAGTGCGGGTGTCCGGCGCCGCATATGTGCCGCTCACC  
TTGCGTGTGTTGCTTCCTCCGGTCTCACTGGAAGCGCACCGCCAGGAGCTAAGGCTA  
AACTTGGTGCAGGGTACTGAACGCACGTTCCGGCTTTTTGCCAATGGCTGACGTCCTT  
GAGTACCGTAAGCGTACACATTCATTAGTAGCGCTGGCGCCATTGCACCGCTGGAGT  
AGGAACCCTGGCCAGGCGGTGCAAGTAACATACGGGGATTGGTTTTGTGCAGATGG  
CTACGGCAGAGCACTTTATGCGGCAGCAGTATCCGGACTCGTTGTTGCGCCGCGGCGA  
GACCGCCAATGGAATGGGAGGAGTGTGCCCCATGTTGCGGCTAACGCGCGCAGGGC  
GCAGCTGGCTGTTGCGCCAACCTGGCCTTGAGAGGCTTTTGATCACTTCAATGGCA  
TTGAAAACAGCACGGCCTGGATTGATGCCAACGGGCAGGGGATTGCTTTCGACACG  
AACACGGGCGCGATCCTGGGAAGCCTGAGTGAGGTCGACGACTCCACCGCACCGAC  
TCACGTCGACCTCGACCAATGCCCGGAGCCACCCGTGGCCGGGCGAGCGTACGACT  
ATGAGGGACTTACGCTCCACAACGAGGACGGAGCCTACAGCGCGCCGGACATAGGA  
ACTGTGCGTCCTGTGTGACAACCACTAACGCATTCTTAGGAATCAACATGCAGGACG  
GCGGGAAGAAACCAAAGCGCGGGCGCAGATGGGGACCTCGCACGGCTCAAAATACC  
GCCTCATTCCGTAGAGGCTGAGCAATCCGTTCTGGGCGGCCTCATGCTTGTCCCGGA  
GACACTGGATGTTGTCAAGGATCTACTTGTGGAGGAAGACTTCTACAGACGAGACC  
ATAGGCTCATCTACAGATCGATTTGCGAACTTGACGAAAAAGGTCAGCCGTACGAT  
GCGGTGACCATGGGCACCTGGTTCGAGGAGCAGGGTCAGCTCGAATTGGTCGGTAA

CGGTGCTTACATGATCGAGTTAGCCAGCACCGTACCTTCAGCCGCCAACATCGCGGG  
CTACGCCAAGATTGTGCGCGATCGTGCCCGCCTTCGTGAACTCATCGAGCACGGGAC  
CGAAATCGTCAATGACGGCTACCACCCTGGCGGCCGGGAGACGGATGAACTCATCG  
CGATCGCTGAGCAGCGTATTTTCAGCGTGGCCGAAGGTGGGAGGGTGCCTCACACA  
TACACAGACGTGACCACGGGTTTGAAGCGTGTCTGTCACAACGCTACAGGAGCGCTA  
CGAGAACGACAGCAGCATTATCGGTATTCCTACTGGTCTTCCTGAGTTCGATGAGAT  
GACCGCCGGGCTGCAGGACACGGATCTAATCATCGTTGCGGCTCGACCTGGCATGG  
GTAAGTCTACGTTGGCCAGGGGTTTCGCAGAAAGCGCGGCTACGCGCTCGAAGAAA  
GCAGTTGCAATCTTCTCTATGGAGATGTCCTCAGACCAATGGTTCCTGCGCATGGTG  
GCAGCCGAAAGTCGCGTCGACGGACAGCGGCTCAAAACCGGCAAGCTGGAGGATG  
AGGATTGGGCAAAGGTAATGTCCGCCATGAAGAAGCTCCAAGGCCTCAAGCTGTTC  
GTCGACGACTCCCCAGCGCTAAGTCCAGATCTGTTGCGCTCAAAGGCACGTCGATTG  
AAGCGCGAACAGGATATCGGCCTGATCGTCGTCGACTACCTGCAGCTGATGATGGTC  
CCGGGATCGAAAGAGAATCGCGCGACGGTGGTAGCTGACATTTCTCGAAGTCTGAA  
AGCGCTAGCCAAGGAGTTGCGAGTTCGGGTGGTAGCACTGTCTCAGCTCAACAGATC  
CCTGGAAACACGGGCAGACAAACGTCCCCTCATGGCCGACCTACGCGAGTCAGGCG  
GCATCGAGCAAGACGCAGACGTCATCGTTTTTCATCTACCGGGATGATTACTACAACA  
AGGATTCCACGGAGAAGGGAATTGCCGAACCTGATCATCGGCAAGCAGCGCAGCGGC  
CCGACTGGGACCGTACGGGCAAGGTTCTCGGGGGGGATCACTAAGTTCGAGCCGCT  
GGGGTCGGGGGCGAACGACTTCTAACAGCCATTCGCCGTGACGAAGATGACATCAG  
GGCAGGTGACCGCCCTGTGTCTTTACGGCCGTGCTGAAAAACGCTGGCGGAGGTT  
GTCCTTCGCGTCCAGCCCTGCGTCGCGGATCTGGCCGAATGCTACCGGGTCAGCTAC  
AGGCTTAGCCTGCGACTTGAGAAACGGTCCAGCTAGCTGCTGGCGAAGCTGAGCCA  
GGCCGGAGCTGAGGGACTGAGGTGTGGCGGTATTTAGGCTCATGCCGAAGTCCTGG  
TGTATGCGTACAATTTACGTCAGGTTATACATGCTTGTAACGGCCAAACCCCCATGC  
ACTAAAGGGGATTTGGCCGTTGTGCGAGTCAGTTGGCAGAAATCAGCGCCCGGAC  
GGTAACGTGCGGGCGCTGATTTAGCAACTAAAGTGTGCGGTCCGTAACGTTTCTGGG  
GGGTGAACGCTCCTCCTTGGGTGCGGTGCGGGCCACTTTCATTGGCATATATGTTAGT  
ATTATACACAGACAGGAGTAGCGCAATGCCCCTCAACCCGAAGCATGAGATCTATA  
TCGTGCGCGTTAATGTGACCGGATACGTGCTGTATCGGGGGAGCAAGTCCAAGGAT  
GCCAACTCTGAGCCCGCAGTCGTAAAGATCTGCCAGGGCGTCTACATGCAGAATGG  
CCTGGACGCAGAATCAGTGTTCAATCGGTATGGTCTGCGTATTGCACATTACCTGAC  
ACCTTCAGCGACGATCAGCTTCTCCACCGCGTGGCACAAGGCCCCCAAGATGGGAC  
GTGTCTTTGTCACTGGCCAATATCAATATGTGCGTCCCCTGTTTCGGGGCCAGCGATC  
GGTACAACATTGTGCAGTCGGTGGGAAAGGTTGAGCCTGACAATCCCAAGCTGCAT  
ACGATGGAAACCTTTCGCGATCCGCTTGGCGAGTTCACGATGCTGTGCGACACGCCT  
GAATTGACTCTGTTGAACATGATGACCGCCACCAAGCGGCATTTCGGAGAAGCACCT  
CAACAGCGAGGAAATGGATGAGTTGCTTGGCCATCTGATGAAGGAGCACGGCGGCA  
AGGCAGGCGTGGCATCGGCCCTGGAAGAAGTGGCGGTGATGGCGGAGCGGACGAA  
TGAGCTTCGTGCGCTGATCGGGCTGCTCTATAGTCCGGGCAAAAGTTTCGTTTCCAG

CTGACTATGGCGAATTGGGTCGACCTGGCCGAGCATGACCTTGTGCTGCTTTGGCGG  
CCGAAGCCGGGTTGCCCCGATGCACGCCAGATGGTCTTGCAAACGGTGACGTCCGG  
CGGATGCATACCGCCGGACGTTGTAGAACTGGGCTTCTTGCCAGAAGGAGCGCAAT  
ACGTGCGGGATTCAACGGTGCTGCTTCCCGATGAATTTCTGCATATTTTCCCGCGGG  
CACGGATGGTTGATGTTCCGCGTGATTTCTTCCAGCACAAAGCCCGGAAGCAACATTG  
TTCACCTATCCGGAAGGCCCGCACCGGAACTCGCCGTTTCGCGTTTTTCAGCCCGCATA  
CCGCTGTAGACGTGCGGGCTTATGCGATGGGCATTGACGCCTCTGCCGCGATTTCATTC  
ATGAGGCGCGCACCCCTGATCGAAGATGGCGCTTCGGTGGTTTCATTTCGGCGGTATGG  
AGAGGTTGACTCGAAAGAGAGGCACATCCGCTTCCCTCAAGTCTCTCATGCACGCGC  
TGGCGGTTTCGTGCCGCGCGCGATGCCGGCGCGCAACTGCCCTTTCAAGTGATGGTCG  
ATTACCCCGATTACGTGTACTTCGGCGGGCGCTCGCCGAACTCACGCAGCCTACCGGG  
CCAACAGTCTAGTCGCGCGTCTGGCAGTTGCAGAGAGATTGAATAGGGGCGCGTGC  
GCCACGGTGGTCAGCACACACACAGGGGTGCCCCGACTTAGTGTTGCGCATAGAGCA  
AACGGATCGCCACGCCGAGCTGGTCGTGGCGCAAACATCCGTCGGCGCCGTAGGTA  
TTGCCGGCGTAGCCACCGGTTTCGAAATCACGAGGGGACGACTTCACCTCGCGTGG  
ACCAGCCAGGCGGAGCAGCGTGGAATTCGACCCGCTGTTAGCGTCGCTTTTTTTGTCA  
AGCTTGCTAAGCGGCGGCTACGAAGCCGTCAACGTTTCGTTGGGATCGCCCTGTATCT  
GGTGCGGAAAGGAGCACTGAGGCGGCCTGATCATGGGGAGTTACGCCCAGCAGCAC  
GGGTGGGTGCTGAGCATTTGATTTGGACGTACCTATGCCCCAGTGGATTGATACCCA  
AGCGGACGGCGTTGCGCTGCTCGCGAGAACTAGCATGAGCGGCGCCAAAGAGCTCG  
TCTTGCGCCGCATTCGCCCCGACACCGTTGTGCCAGATGCTGCCCTAGCCTACGGTT  
TTGAACCAGAGGGTGAGATTTTCGTCCGGA AAAACACCCGTTTTTAGTCTGACGGAGA  
TTCGTGAATCTTTCCGGCTGCACAGGTTGCGGATATGGCGCTGGAGGACATCGTCT  
ACCGCGTTGCCGCGCCAATAGCCAGGCTGGCCGTGCCGAACCGTCAGTCTTCGGCGC  
GGGCAGCAGAAAGTGGCTCTGCCGGCCGCCGATCATCTCGATGTCGAAGCAGCAGCC  
CCTTCAACTTGGGCGCATGTGCCGCGTGACGGTTCTTGATGAGTGCTCGATCAGTG  
GTCGTGGGGGGCGTGCCGCTAGTGGAATTTGAGGGCATCTCCTACGCTTCGCCCAG  
AGCCCAAAGGCAGTTCACGAGCAGGCCGTGCTGGCCGCTGTAAATGCAGGTGAGAG  
CCTGCCCTTCGCCGTACTGGTTGACTACCCACAGACGGCCTATTTCCGGGGCCACGAA  
GCGGCATGCCTCCACGCGGGTGCGGAAGCTTCTGTCGTCCCTTGAGATCACCGAGAG  
ACTGTTAGAAGGCGAGCGTGCGCACGCGGTCCTCAAGAACGATGGTTTTGAAGACC  
TTGTCATCGTCCGCGAGACGCGGCCCGAAGGGCAGCGGTTGTCATTGACCCATTACT  
GCGACAAGAACGGCCAGATCACCTTGGACGCCGAAGTTGTGTTCCATATCCGAGGT  
GGCCAGCTCCACCTGTCTGAAACGGCTGTCGAGAACGTGTTGCGCGGGCGGTGAAATT  
CGAAGCTACGACGCTTTCCTTGCCAACCGCTTGTCGAAGAACTGGCTCGATCAAGGT  
TTCGCGCTTTCTGAGGTTCACTGGCCGAATCAACCTGCGCCTTCAGTCGTCCGTTCTT  
CGCCGGCCCTACCTGAGATGCCGCCCACTGTCGGCGCTGCCTCCGTGGCAAAAGTTC  
CCGCTGGCCCCGGCCGCCGGGATGACAATGGCCTTCGTCTTCGACTCTGCAGCAGCCG  
CCAAGCTGGCGGTGCGCATGAGTCAAGGTGCCGCCCTGGGAAACCTGCTCGCCGAA  
TGCGCTTCGCCGACAGCGACCAATTCCCCGCGGAGTCGGATTGGCCAAAACCTTGTTT

GGAATGTTGTTGCTAGAAAGACGCCAACGGCGTGCGATATCTCGACCTTCGCTCCGAA  
GAGATAGCGGAAGATCTGAGCGACCGCGGCGTGGAGTACATGACCATCAGCGAGGC  
TCAACGAGCCGGACAGCTGACGCTTGTCCAAAAAGAACTGGTCAAGGGCGCTCTGC  
TCTTCGGGCGCCCCGTCTATCGCGCACTAAAATTGGCCGATGGCTCGGGCGCCTTTT  
TCGCCATCGAAAGAGGCGCTGCCGGCGAAAGCTACGCATACAAGCTCGAATTCGCT  
GACGGTGGGCGCCCCCATTGGTTGTCTCTAGGCGCGGCCTGGATGCACGGTGCGCCA  
AGCGATGGTGAACTCCTGAGCAGCCGACCACGTCCGATCGATGCGTTCGATCAGCA  
TGCGTTCGTGCATAAAATCAATCGAGCGATCGCAGAGACCTCGCAAGACGTGCTCA  
ACGAGCGCTATCGCATGCTGCTACTTGATGCCGACAGGATCACGGTGCGCAAGATAT  
CGGAACAGGCCTATGAGTTCAGTTCGGCCGATGACTGGTTGCCATTTCGGGGATGTGC  
GTGTAGAGCAAAGCGGTGACTATTGGCGCGCTTCGCACGGCACAACAAGCTCATCG  
CTCCGGTGTTCCTGGAGGCTGCATGCTCATGGGCTAACC GCACGATTGCTACGCAA  
CGCGAGCACTATCTCGCACACCTCCATCAAACCACTGACGGATCACTGCAGTTCGCC  
ATCCCGGAGCAGGACTTCACTGTGCTTCGACGGGTGCTGCACAAAGCGTCGATCGG  
CGAGCAGACATCGTGGCAAAGCATGGGTGTCCAAGGCGACTGGACGGTCTATCCGA  
AGGATCTCCGAGCTGAGATCATTGATGATGGAAGGCTGCGTATTGCTATACGCGGAC  
GCGAGTTGATTTATGAGATCTGTTTCGATGGAGGCGGACCCGGTCTCAACCTTTGCTT  
ACTACCAGACCGAGGGTCTGCGCCGGATCGGCCAGTGGCTCGGCCAAGTGCAGGAC  
GACATCCGCTGGGATGAGACCGTGAGAGCGCATCCGGAGGGTGGACTATTGAAGCA  
ACGCATGCGTGAGTATCAGGACCTGCAGGTCAAACACTACGGTGCTGCAAATTTCA  
GTGCGCGTGTTCCATCGACACGGGCCCCGCGAGATGGTGCTCGCGATCACCGACCGA  
GACGTTGACCGCCTGATCAGTGTGATTGGCGACAATGGACCCAACAACAAAAGCAC  
GATGCGGCTGTTTCAATCGGTGTCCGGCCTGAAGCCTGGACACAGCAGAACCACTC  
GGGCCGAAGCGGTCTACCGCTTTTGCGGGTATAGCGATGAGCAGGCCGCTCAACAC  
GCACGGAGGCGTGAGGACCTGGCGCGTGTTTCGCTCGATGGCGAGGGAGGCCAAGGC  
GCGCATTGAGTCGGCTGCGAACATGAAGGTCTCGCACAAACGGCACTGAGAAGACTG  
GCAAAGCCATGATTGATGATGTGTGGGCGCAGGGCTACACGGAGCTCTCAACCCGA  
CGCCAAGGCGCTTCGACCCGCTACATGCTGCGCAATCCCACCACTGGCCAATACTAC  
GATCTGAAAGAACCGCTAACCGGATACGCCCGGCACTTGGTCACCATCAAAGACAG  
CGCTAACTTCGTGCCGGGGCCAACAGATGAGCCGGAAGATGTCCATACGCCGGGCT  
ACTGAGGACCTGCCGATGATCGGGCGCACTACCAAGAACTCTCTGGATTTTCGAGGC  
GACGATTGGGCGCTACTTCGCACGCGCAATCCCAGAAGGTACGTTTACAGAAGTTG  
ATGGGGGACTGCCGGCCGACTGCCACGAGCTGTGCCGACTGTTCCGGATGCGTCCG  
GTCGCGCTTCACTATGGCGGCTCTGACAAGACGCTGCAGTTCGAGGCGATGGTCATC  
AACGATCGCCTCGATAAGCGAATCTTCCTCACCAATCACGCGAAAGAGCCCCTTCGC  
GCGGTGATCGGACACGAGCTGACGCATCGAATGCAGATTGAGCGTCCCGACCTATA  
TCGCGAGCTGGCCACGGCGATCGCTGCCGGCGGCGTGGACCAAGAACGTTGGGGAG  
CTTACGTGCACCTGATGCGAGCGAAATCGGGACGAGAAGGCCGCCAGCTTTTCGATC  
GAAGA ACTCCGCAGCGAAGCCGTAGCCGACATGGTAGGTGATCTGCTCCTTGATAG  
GCGTCTATGGGACGCCCTGAGCGCTCCATCGCTTGCCCAAAGGGTCGTTGGCTGGGT

GCAGGGCGCATGGAGGCGTCTGACGGCTCAGGCTGCCGTCCAGGCGCCGCTGGGGCG  
GAGCGCCATTGGCAAAGGATCGTCGGGCGGCAATTACTGCGGCGACGGTTGTCTG  
CAGCGCTGGGCGCACGATGTCACAAACGATCCTGTGCGGCGGGCCGGACTACATGC  
GGTAGGGGCCAGTTGCCGCAGGGCTGGGCTCCGGCATGAGGCGGATCCAGCCGCTG  
AAGTAATTCGGTTTACCAATGTCGCCGGTGACCTGGTCGCCACCGACCAACTTCCCG  
TCGAAGTCGCAGAGGCGGTTGCGGGCACTCAATCAGACGACGGGCGAGCTATGGCGA  
GCGGCGGACTCGGTTCGAGATGCGCCCTTAGAGCGTGTTATGAACTTTGCCCTTGTC  
CGATAACGTATACGGATGAAGCCTCGTAAGCCATATCCAACCGATATCTCCGACGA  
AGAATGGGCCTTCGCTGCGCCATATCTCACACTGATGGATGCGCAAGCACCGCAGC  
GCAAATACGCGCTACGCGCGATGTTTAACGCACTGCGCTGGATCGCACGCGCCGGC  
GCACCGTGGCGATTGCTTCCCAACGATTTCCCGCCTTGGAAGCGGTGTATCAGCAA  
ACGCAGCGCTGGCTGCAGGCTGGCTGCTTTGAGGCCATGGTCAGCGATCTGCGCTCA  
CTCTTGCGTGTGGCACAGGGGAAGAAAGGCCACAACAGCGCGGTGATTTTTGATGG  
CCGGACGCTGCAGTCCACCTGTGAAAGCGGGCCGCGTGCTGGATACGATGGCTACA  
CGCGCAAGAAAGGCAGCAAGGTGCATATGGCCGTCGATACGCTGGGACATCTGATT  
AAATGAAAGGGAAAGAAGGAAAAAGAGAAGAAAAGAGCACAGGTCCGTTTCGTTGG  
CCCAGGAGGTACAAAAAG

>CONTIG\_2\_length\_37921\_cov\_10.633037

CATGACGCTGCGAACAGCTGATCCACCAGCAAGATCTGACAGCCAAGAGCTTCGGC  
ATGGCTCATGCGCTGCGGCAGATTTCATCGGTGCCCGTGTAAGCTGTTGATCCTGCTC  
TGCATTCCGATGGCCGCTCACGGCGGCCAATTTGTCGATGACCGCTTCCGCCGATCG  
TTACGCCGCCTCCTTGCGTCTGTCCGTCGCCCCGATGATGGATTGGACGGATTCATA  
AACCAATCAGTACCTTGTACCTGGCATGGTGCATCTCTGGTGCGGCTGACGCATGCT  
GCCCCATGTTCTGGTCAACCGCGTGGGTGCGCAAGTTGTGCGACATTGCCACCCTATAAT  
TCATTTCGGTGCCGACGTGAACTCCGCAGACGGACCTGCAGTTAAAGGTGACAATCGT  
GAACGAGATGAGCGCCGTAGAGCTTACGCTTGGGGCCTCATTTGCTTCATCTTGCTT  
GCAGTTGGCTGTTCCAAACCGCTGTATACCCGCATCGTTTCAGAATAGCGAGCAGCGC  
TGGGCCAAGGCGTTAGCGATTGAAGCAGACAAGCGGGTCGCTGCAAATTTGGCTGC  
GCTTAAGGCTGGAGTCGACCGCAAAGAAGCGATCGACTTTGGACGTCAACTCGATT  
CCATAACTAGTTTCTATGAGACGGTAATCACGGTATTACTTGCAACCCTTGGCTTGA  
TTGCAGCTCTGGCCGTATGGACTGTCAAGTCGCTCTCGAAAGCGCAAGCCGACGAG  
GCTGCACGAACCGCAGTTTTTGAAATCATGGGTGGCCATGAGGATTTTCAGGCGTCG  
ATTGGAGAAAGAGGTACGAAGCCAGTTGGATCTAGAGCTAGAGGTGATTAGAGAGC  
AGTTCGAGAATGGAGGTGGCCTGTCTCAAGACTCAGTGATCCTCAACCCGCAGAAA  
CGCTCGCAGAAACCGCATTTTATTTTGAAGACGCCCCCAACGGCTTAGTAGGTGTAG  
CAATGGCAGTAGTGAAAAAGCGACCGCCGGTAGCGATGGAAGCTTCGGTGCAGACG  
GCAAACATTGGCCAGGTTTCGAGCCATGCTCGACCGTGCAGGGTTAGGTCGTGCCCCCT  
GTAGACGTCATCGGCGCCGCCTCTCTCCTAGGCCTCCAGGTCATCTATGAGCAGATG  
ACAGATGAGATGTCGGGCTATCTAGAAAACAGGGGCGGTTCGCTGGGTTCGTGGGAGT  
TAATGCTCTACATGCAGGCGTCAGGCAGCGTTTCACCATCGCGCATGAGATCGCACA

CTATGTGCTCCACCGCGGTCAACAGGGCACTTTTCGAGACGTCATATTCATGCGTAG  
GTCTTCAAATGCCAACGCTATGGAACGAGAGGCAGATTCTTTTGCGGCAGAATTGTT  
GATGCCGGAATCCCAGCTCGTACAGGATATTCGGTCAGGCTTTGTCAACGTCATGAT  
GCTTGCCGAGAGGTACAACGTATCGGCACTGGCGATGAAGTATCGTTTGCAGAACTT  
GGGCTACGCGGTGAGCTGATATGGAAAGGCTACAGGGACGTACGTATGTGCCAGCT  
CTGCGCACTCGTGA CT CAGAGCTCAAAGCGTTTGAAAATCTCAGACTAGACGTAAG  
GGCTCAGTTGCTGCCCCGTTTTTCGAGTTGACTCGGTCACGACGGTCAAAAACCAATCC  
TGACGGATCGGTTACCAAAACGGTCGAGCGACTCGTGAGATTGATGGGTGAAAACC  
CTTTCATCGTCGATGTCACATCCCTAGATTACAGGCCAATGCCGAAACGGCAGATT  
TTCTGGATGCAACTGATTCGTTTCGGAATTGGTGTA ACTTCGTATTGGCGAACTTGCC  
AGCAAGCTGCATCCCGGTGGTTCACCTGAGCGACCCCTTCGACGCTGTCGAATTCTC  
TACGCAGCGTGCGAGGCTCGAGTCCAAATTTTCGCGGAATAGCACTCCGGATACCTA  
CGGATTATGCCGGCGCCTATCTAATTGCAAATGAACTCCGCATGCGACCGAGGGATG  
GTTGCATAGTTCTGT TAGTCGATGGGGGCTTTGTTAGACAAGGTGCGGCCGTACATG  
CATGAATCAATGCATGGTAGTCGAAGGTTATTTGCCGATTAGTTGATCTGATTG  
CGCCACTGACCAGCAGCTTTCCCAGCAGCGTAACTGAAGCAGCGTTTGGGGGTGGC  
GATGCGTACGGGGACTTCGTGCTGGAAGAGACAACGGTATCCGAAGTTCTAAAGGT  
TTTTGGCGTAGAAAATACCAGGGTGGTGCATGGCGATTACGCCCTTGTCATCCAAA  
CGACTTTGAGGGGACCGTTACTAATTGGGTGCCTCGCGTTGATGTTCCACTAGAAAT  
TACAGGCTTCTATTATCGTTATCGTAGGCCTGCAGGCGGCTACGCTTTGGCAGCCGG  
GCTAGCTGTGCGCGACGTAAAATATCAAGTGATAAACTGCTGGGCACACGACATGG  
TCGTCAAAGCAGCAGCCGGATCACCAGAAGGTCGCAGCCCGTCGTTTTGGATTTCGG  
TTCGTGTCAATTTCCATTTAACGAGACAGGCGCTTAGGCTGAACTCGCAACTTCCCC  
GATAGCGCGAGCAGCTGCAAGTCGTCTAGGTCGACTATAGAGCCCTTCTCTTGCTGG  
AAAGCTGCAAATCGATCTCTGCATCGCGCCGCAACGGAATTTAGTGCAAGGCACGT  
CAGTTCCATATCAGAATGGATTTTTGTGGCTAGCTGACGTGACTCGTCAATACCTCTT  
ACTCGCACGACCGTCGAGCCAAGAAGAGATGAAAGGTCATTACTATCCAGCCACCG  
GACAGCATGTTCTGCCTTCAGGCGAGTGCGAGGCCGTGGACGCCTCACCCACGTTGC  
ATCCTCTTGGCCCAATAGGATGAGTCCAACGTTGCGGGGAATCATTTTCGCGAGCACT  
GCTTAGGTGCTGTTGTGGA ACTGCCACACTGACGTCCAGGAACATTTTTTGATAATC  
GAAAACCTGATCCGCAAGTCTTCGAAAATTGTCCCTAGGTCCCTTAATCTCGAATGC  
GGATAGCCTCGATGGGCCTATGGCAACTAAGTCAGCTTTACGGCTGACATCTAAGAA  
CGGCAGTTCCACCGCTAACGCATCTGTTGCCGATAGCTCAGGAAGTAGCCATTCGAT  
AAGCTTGATTGCTTCGTCACATGCATATGTCATGCGCCAAGTATCACGTATGGCCCG  
TTGGCTTGCCATTAACGAGTTTCTTTTCTAAGGCTGTCCCACCACGTTGCTACGTCCC  
GCACGTGATAACCCCGTGCAGCGGACGCGGCGCATCGCCCCGCGCGATCCAATTC  
TGCAACGTCTTCATCGTCAGCTTGGGCATGAACTCGGCCCCGGA ACTGCTCGACGCTC  
ATCGTAGGCCCGTAGTGGCCGTATAGCAGCCAGAACGTTGAGTGTTCA GTGGCTCCC  
ATTACAGATCTCCTTCTTTGTGAAGCTGATGACCCACACCCAGGGGTTGGCGTCCCA  
GTCGCCGCCGGTGCTGGCCCACAAATCGGCGAAGCTGGTCACCGGGTTAGCTGCGT

AGAAGCGCCCGTCCTCGGCGTGGAAGCCATGACCGTCGGCATGTGGCGCGATGCCC  
TCAGCCAGCGCATCGGCCTCGCTGATCGCCTGCAGCCGCTCGACGCGCACGTGCGGTG  
ATCTCCAGCAACAGGCGGCAGGCATCACGGGGCATGTGGATGCTTGGCTTCCACAC  
TTTCGGGATCCCGAGGTGATCGCCCATGCGGTAGCCGTGTTTCATAGGTCGCGCGGTA  
ATCGACTTCGATCAGGCGACCGTCCACTGACGATTGGATCGGAGAAAACGTCTCCC  
GCACCCACAGCCGGTCGCCGATCTTCCCAAACGCGCAATCGGCCCAGTAGCTGTCGC  
CGGCCAACGGATGTTTGGCCGGAAGAATTGGCCAGCGGCGTAAAGCCGTAAGCGGT  
TTGCCAGCTGCTTGCTCCTCTGACCAATAGAAGAAGCCGGATGGCCTAGTGCCGCCG  
GCAGGCGTAAAGCAGTGGGCTTCCGATGCAAAAGTGGCCCACTCGCGCGGCAGCTC  
TCCCCCGACTTTGACCACGCGGCGCGTCTGCGTCTTCGCGCCGGACAGGATGGCGCG  
CACCATGGCGCCGTTGAACAGGATGGGGCGCTCACGCATGACTGAAAATCCCCAGA  
CGACGCCTACGTTCCCTGTAGCGCACTTCCTCACGGCTGGGCACGCCAAGCCAGTCG  
GCAAAACTTTCACTCGATTTCGGATTTGAGGTAGGCGCGATACCTGCGCTGGCCTGAC  
GTCAGCTTCGGCTCAGGCGGCAATTTCTCCACCTTGGCGGCTTCGGCGGCGCGGCCG  
GCGGCCGTGACAGTGAAGATGTCATCGCCACCAGAGAGCGCGTTGCCGCTGCGTCG  
CTGCATTAGGCCGAGCTCGACAAGCTGCATGCAGGTCGGGTGGTCTTTGCTACCTTC  
GCTGGTGACGAAGTGGTTCCGGTGGCTGGGTTTGCGTCCGTACTCGCCGGTGCCGAG  
CGAGTGGCGCAGCACGTGCAACTCGGCCTGTGTGTCAGGTCACGCATGGTTGTGCTCCT  
TGTCGATCGCCGCGAAGCGCTGCGGCATCTGGGTGTCAGGTCTGGGCGCTGGCCGTTGC  
GCCAGGCGGTCTGGTAGTGGCGGCCGAAGTCTCGCGCAGCTGGTCGATCTCGCGG  
GCATCCGGTGAAAGCTGGGTGCGCCGCAACTGGCGGGCGCACTCGTAGCGCTGCAG  
GCGCGCGGCAGCAGTGATGTCCGGCGGCATGCCGGCGAGGTCGTGCTGCAGGATGG  
CGTCGAGGCCGCGGCCGAGGAGGGCGAGGGTCATGCGACGTCTCCAGCGGCAGGC  
CGATCTGTGTGTCGGCATCGCTGCTTCGCAAGCGGCGGTCTCGATGGCAGCGGCAATGC  
GTGCCTCCGCGATCGCCGCATAGGCCGGGTCCATTTTCGATGCCGATGAAGGCGAAG  
CCCTCGAGCGCAGCTGCTTTGCCAGTGCTACCGCTCCCCATGAAGGGATCGAGGACG  
ATCCCGCCTGCGGGCGTGACCAGTCGGCACAGGTATCGCATCAGCTCTGTGCGGCTTC  
ACCGTAGGGTGATAGTTGCCGTTGCGAGCTGGCCAATTGGCTAACTCACACGAACGC  
ATGGTCGCGTCGGATCCCACCGCCGGGATGGGGCTGCCAGCAAGTCCCTCATTCCGA  
TCTGAACGCGAGGCCTTTGCGCAGTAGAAGAAACGCGCAGCGGTGGTATCTATCTC  
GACGCGAGGGGGCCGATTGGTCGTGACATTTTCGAGAGCGCCATAGACCGCATTGC  
CGCTGGCTTCGCCATCATCAAGGGCTCGTCCCTGTTGCCCCCTTCGCGTCCGGAAAAA  
CAGCAAGCACTTCATGGCTACCGTCGTGGAGCACGTTGGCCGGCCAGCGTCCGCCCT  
CGCTGAACTTGGCTCCAATACCGCAATCGTCCGTGTTTCAGTGCGCCGGTGCCATAAG  
CCGAATGGTTCGCCGCCACGGTTCCAATCAGCGGCTTGCGCGCCAGCAGAATCGGCT  
CGTGTGCTGGCTTAAGCGCGGTACCGCCCCACGGTCCGTTATGCGACTTCGGAAACC  
CTGAGCCGAAAATCCACATGAGCTGGTCGCGGACCTCAAAGCCAGCGTCCTCGATG  
CCGCTGGCCATGCGGTGGTACGTGCGCGGCGCAGCGAAGGACAGCGGGTATCCGCC  
AGGCTTAAGCGCGCGCAGCACCTCAGTCGCCCATGCGGTGCTGAATTGCTGAAACG  
CTCGCATGGCTGCCGGGCTCATGTCGTATGTGCCGGCAGCCGCCGCGCTGTTGTGCG

CGCCGTTTTCGGTGGCGCTTGGATCCGCTGATGGCATGCTGCGCCGGTAACCGTGGC  
GCGCAGCGATGTCGGCCCCGTCCCACGCCTTTCCCATGAATCCAATTCCATAAGGCG  
GGTCGGTCACGATGGCATCGACCGAATTGGCGGCCATGGTGGGCAGGATGCTGAGG  
CAGTCGCCGACGTGGATCATGCGGCCACCTGCAGCGGCTGCGGCTTCGTATCGAGGT  
TGGCCTGGGCGAGGGCTACCAGCGGCGGCGGGCTGACGCTGTTGCCGCACATGCGC  
ACGGCGGCGCTGGTGCTGATGGCGCGGCCGTCAGCGGTGTGGGTGATCCGGTACGT  
AGCGGGGAAGCCCTGCGCGCGGAACAGCTCGTGCGGCTTGAGCATGCGCAGGCCAA  
TATCAACGATGACGTAGGGCGTGCCCTGGATTACCACCGTGACCAGCGCCATGCGA  
TCGCGCGTGGTCGCGGTGTTCGAGCGGTTTCGCGCAGATCCACGGCGATGCCGCTGCC  
GTAGTACTTCACCAGGAAGGCGGCGACCTGCTGTGCGCCGGCCTGCTGCTCGGCGCT  
GAGCGTGCACCTCGATCATCCCGTGGTGACGGCACCGGCGCATACGGTGCCGAGCG  
GCTCGGCTACATCCTGGCCATGAGCGTTCTTGCGCATCGTCACCAGGTGCGCAGTCG  
CGAGTTGCTGCTGGCTACCGGTGCGCGGTGATGGTGCTCATCGGGTCGCGCGCATCGC  
GGCCGCCGCCTTCGTAGAAGCCGCCGTTTCGCTGCTCAAGGAAAGCGCATGCGGCC  
GCGTGCTTTACGCCGCTGGCAACGACGGTACCAAGCGGCTGCTGCAGGTCTAGGGC  
GCGTGGTGCTGCCCCCTGGCGCTCGCCGTAGCCGGTCTGCACCAGCACCGGTGCCAC  
CAGTGCGGTGTCTGCCTTGGTGGTCATCGTGTAGAGCGGCTCAGCACCGGAGCGCGG  
CTCAGACTGACCGGCTCGGCCACCCACGCCGGCCAGGATCGGAGCGACGGCCGAGA  
AGTGGCCACCTTTCACCCCGGCGCAGATCGTGCGCAGTGGCTCATCTGCACGCATGC  
TGCCAATGGTGTGGCTGCTGTTTCGCATGTTTCAGCGATGAAGGGTGCGAGCTCCGGCG  
CGACCAGCATCAGCTCGCCGCGGTTTCGAGCGGTGATCGTCGGCAGCGGCGCTTGC  
ACGTGCTTGACCCGGTCCGAGCCCTGATGCGTGCGCCGGCACGATGAAAGGGTCGGC  
CGACTGCAGCACATGGCGCATGACACCCTTGGCGATGCGGCGCAGGGTGGCATCTG  
CCAGCGGGCGCTTGCGGGTGAAGATCGACTGGCAGGGGATGGAGAAGTCGAGGCA  
GTCGGCAGCACGCACACGCGGCTGCATGCCGGGCGCTGTGCCGTGCGTCGGCGCCG  
GCCACACAATCGGCTCGCCGTCGCGCCGCGCCAGCATGAAAAGCCGTTTCGCGGCTG  
GTGCCGGCGCCGTAGTCGCTGGCGGTGAGCTTTCGCGCCACTCCACGCGATAGCCCTTC  
GACTCCAGCGCGGCCACAACTGGCGCCAGGTGCGGCCGCTGTAACGCTTATCCGG  
CACCAGCTGTTGATTTGCCACCGCCACTTGTTCGCCTGGCGCAGCCACTCGGTTGAC  
CATGCGCCCGGTAGCTGGGTCCATCACCAGATCAAGCGTAATCACGCGGCCGTTA  
CCTTGCAGCGTTTGGCGACCAGCGGACCCCAGGTCAGAATCTGCCAGACATTTTCCA  
GACTGATGATGCGCGGGCGCATTGCCGACGCGGCGGAGCTGGCCGACCCACTTCAGC  
ACCACCCACGACAGGGCGCGCGTCTTGCGGCTGCGCGGCTGGCCGCCCTTGGCCTG  
GCTGAAGTGCGTGCAGTCCGGTGACGCATGGAACCAGCCGACTGGCCGACCTGCGA  
CGTCCTTGCGCGGGTCCGCGTGCCAGATGTCCTCGCGGTGGTGGATCGTCAGCGGGT  
GATTGGCCGCGTGTCATGCCGATCGCCACTCGTCGTGGTTGTAGGCCAGCGCCGGGT  
CAATGCCCAGCGCCTGCTTCAGCGCCTCGCTGGCGCCGCCGCCGCGCCAGCGAACAAG  
TCGACCACGATCTCGCCAGGGCGCAGGCATGAGACCTGCGGAGCTGGGAAGTTGAA  
GGAGTGCGAGCCGTCAGCCATGGGTGCAAGCGTCCTGTGCGGTGGTGTTCATCAGTC  
GGTGGCGATGCCGCTCATGGATTGGCGGTATCCGGTTGGGCGGCGGATGGGCGTGTT

GCCGAGCACTTCGATGCGGCCGCCATGGGCCTGGAAGTCGGCGATTTCCTGGGCAA  
TGCGTGCGCTCTCGATTGCCTTCTTCTGCGCCGCGCTCAACGCAAGCACCGCATGCG  
ACGGAGTGGTGTGCGACGCCACGACAGCGGGCTTGGTGCAGACGAGCGGTGTTCTCG  
GCGTCTGATGTGATGGTTCTGGCCACCTTGGCGCGCGTGGCCGCCGTCAGGCTCCAG  
CGCGTGCCGGCCGGATCGGGCGTGCGGATGACAAGGCCCGTGCCGCGCATTGCGTT  
GAGCGCGCGCGTGACCTGAGATTGGCTGCACTCGGATGCAGTGCTGGCCTGCAGGG  
CGGCGCTGGTGGCGCCGTCTTCGCGTGGAAGAGCCCTGCACGCAGCTGGGCGGCC  
AGGCCTTTCGATTGCATGCCCCGTACTCATGCGACGCCTGCTTGCGACACAGGCGCGG  
TGAGCTCTTGCGCCTGTGCAAGACCGCGCGAATTGAGCGTGACAACGCTGGGGAAG  
TCGCGATGGTTCGAAGTCGGCCAGCCGGCTTTCTTCCAGCCAGTTGATGGCCCGGCGG  
GTAAAGACGCGATCGGTGGCGCCACGAAAGCCGGCGCGCGTACGGCGCAGCGCGTG  
GTCGGGAGATTGGAATGCCGCGAGCAGCGCTTCGCGAACGATGGGCTTGAGGTGCA  
TAGGGAGTCCTAGGCGGCGTGTCGCGCTGGGTGATGGCGGCCAGTGCCTCTTCGCG  
GGCACGGCCGATGAGCGACAGCGGCACGCGCTGCAGGCCAAGCGGATCGGCCCAG  
CGGTTCTCCACGAGCGAGCGCAGATGCGTTCGGGCGCGTGGCCACACCGCAGCGGGC  
GCACTGGATGTGGTACGTACCGGCACCGGTGTGCCCAGGCGGGTGCAGGCGCA  
TCGGTGCGCCGTGCGTCTCTACCCACTGCGGGTGGTGGCCGGCTTGGCAGCCGGGGA  
TGCTCGGGTGCAACGGGATGGCGATTTGACGCATGGTCATGCCTCCAGTGTGTGGAG  
ATCGGCGTTGCCGGTGAGCAAGCCGGGGATGGGGTGCGGGCTGTCTTCCACGCCGG  
CGTGGATGGCCGCCAGGCATTCGTCTGTCTCGGCATTGCAGGCGTGCGCGATGACGG  
ACCAGAACGCGGCCAGCTGGACCTCCCCGCGCAGCCGCGCATGGGTTGCCTGTGTG  
TAGGCGTGCCGGTGAGCGGCAAAGGCCGTGCGCACGCGGTGATCGAGGGAGATGTC  
AGCGGCCACGGGCGAGCACCTCTGCGTGTTGCGCGTGTCCTGCGCCAGCTCGAGC  
ACGCGGTGGGGCACGATGTAGCAGGCGGCCAGCGCCAGCAGGCACCAGGCGATGC  
GCATCCGGCGGGTGCATGGCTGCACCTCGCGCACGCGCCGGCCAGCGCGATCCAACC  
AGCGCACTGCCGAGCGCAGCGCAGTGGTGGACATGCGGTACCGGCCAGTGCCGATC  
TGCAGCTCGGTTCGGGCGCGCCACGAGCTGCCGCGCGAAACCTACCGAGACCTCCTG  
TGCGGTGCGGCTGTACTCGCTTGATAAAGACCTGCCCAGACGTGCCCGCGCCCGAA  
CTGCGCGCTGTCAGGCGTCACCTGCAGGCACAGCAGCTGCCCCGCGATGGCCTGTGG  
CGAAGTCGGCGCATTGCAGCGCTGCGGCGATTGGTGCCTGGGTGCTCATGCGGTCTC  
TCCGTCCGGTTGCCCGGCCAGTTGCCCGGCCAGTTGCGCGGTCAACGCGGCGTTGTC  
GGCATGCAGTTGCGTTGCGTGTTGCGCGCAGCTGTGCGATGGCGGCATCCAGATGCGT  
TAGCGCGGCCTGCAGCGGCGATAACGGCTGCAGGAGCGCGATGCACTGCGAGGCGA  
ACGAGCGCAGGCTGGCGACGGTGCCCGTGTTTCATGCGCGCGATTCTCAGGACACGT  
GGCTGCTGGCCGATCCCTGCATTACGCCTTCGGCAAACGCCTTGAGCGCTGTCCACG  
ATGCGGCCCGGCAACTCAATGCAGCCGTGCATTAACCAGATGCAGTGGCGGACGCCA  
TCGAGGTCTTGCGGCATCTCGAAGCGAGGCGGATCACCGTCGCCGCCACGATGGC  
AACCAACTGGATTGGTTGGGCGCGCTGTGGTTCGTAATAGATCTCGGCGAGCCAGA  
AGCGCGCATGTGTGCTGAGTTGAGATCTGTGGACAGAACGGCCGTTGTCCTGCCAT  
AGCAGGCAACTTCCAGACGCATGCGGCTCATGCGCGCTGCTCCAGCGCGAAGTCAC

GGCTCGCGGCTTCTTCGCGCAAGCCCTGCAGCTCGATCCGGTTGGTGCGCTTGGGGT  
AGCGGTTTGGCCCCCTTGCTCATGCCGCGCCGCTTGAGCGCATTGGCGTGGGCGTGGT  
CTGCGGCAGCACAGGCGCTAAGGCAGCGGCGTGTAGCGGGGCCGCTCAGGGAAGCC  
GCTGCGGTGAGCTCGTCGAGCTCAAGATCTGCATTCCGGGACATGGCGCTCTCTCCG  
AAGAAGGAGGGCGCCGGCGGGTCAGTCAGGCCAGGGGAGGGGCTGCTACCGGGCA  
GAGGGAAGGGCTGGCCGGCAGGGACGACCCGCCGGTCGCCCCGTCAGCTTTGTGGGC  
TGACGGGTCTACTCTACGAATACCGTTACACGCTGTCAACGGAATTCCGTACAAAT  
TTCTTGACTATGGCCCTGCGGGGACGTTTAGCGCTGCCCGCACGGGTTCTCGATGGC  
TCTCTAGTCTTGAAAAGAAGATCGTGGGTGAGTGCGCCGGCCCTGGCCATTCTCCGT  
GTTGACTTCAATCTTTCCATTGATAGGGCGCCAGCACATTAAAGTGCGCAGTCCGGA  
CTCTGGCTGCCCCGGGCTTTTGTATCGATACGACATTCCAGCCTTCGCATTGACCACC  
AATGCTCGATGAAGCCTCAAGCAATTCGTACTCCATGCCACTGCTTACACGTAATTT  
TCCGGTGTATGTATCTCTCTTGGTGCTTGGTGATTCCAGTATTCCGGCAATGACTGCT  
GAGCCACAAAAAGCAAGATCGGGAGTCCTAAAATCGATCCGAGCGTCCAGCCGAT  
CACTTTGCTGATTTTTGAGGACTTTGCGACCTCTGGGTGAACGATGGTTGAGGCTTTT  
ATGGGTGCGCCGACGCCGGGCACGCACTCGCTTTATCGCTGATTTCTTACCGCAT  
TCTTCGCAGCTGACCAACATGGTTCCATCCTATTGAGTAATCTTCGGAAAACCTGCG  
TATCTCAATCAGCCCATCCACCAATCCAGTGCACGCGGCCAACTATGGAGATAGGTT  
CTCGCTTCGAATCCATGCGCTTTGGTTTCCGCCAGTTGTGGTCAACCGTTGGGTTGTC  
ACTGCGAAAGTACACGGTGCCATCAAGTATTTCCGCCCGCTTAACGTAGTACTCTGG  
ATTTGCCACGCCATGTACCTGAATCAGGTACAGAAGTCCGTCAATTGGTCGGATGTC  
TGATGTATCAAATAGGATTGCATCGCCATCGTTTATTACTGGCTCCATACTGTCGCCG  
CGGCCGTAGTAAACAGCCAGAGGACGCCCGAGGATGCCACGCCGCCGACAGACTTGT  
TTTCTTGAATTTTAAACTGTGTGTCTCAGCGTACTCTACGGCTTCAACCCCGCCAGTG  
CCCAGCCCGACAGCTTGCGAATACCCGATAACATCGGTCCAGTCTGTGTCTTCAGTC  
TTGGGTTGCTCGAGCTGAGATCCTTTACCCGTCTCTAACCCTAACGCGCACCCCG  
AGCCGCTCGGCGATCTTGTGAAGCCCGGTCGTGCTCTTAGATCGCCCTAGCTCAAGG  
TCAGATAGAGTCGTGGCCGCAATTCGGGCGGCGCGGGCTAGCTCTGCGCGCGTGAT  
CTTCTGTTTTTCCCGCTCTTCGCGGATTCGTTGGCCGATTGAGTTCATGTGAGGATTG  
AAACGGAATTCCGGAACGGAATGCCGTTGACAACTTGTAACGGAATTCCGTAGAGT  
GCCCCATGGATATCACTTGGGCAGATCGGATCAAGGCGCTCGAAGAGCATGGCAA  
GTCTCTAACGGAGATAGGTCGGCTAATCGGGAAGTCACCGCAAGCGGTGAGCGACA  
TCAAGCAGGGTCGCACTCGCGAGCCAGGCGGGATGGCGGCCGTTTCGGTTGCATGCC  
CTGTATCTAGAAGTCAGTGGCCCGGCCACTGACGTGCAGGAGGTGGCCTGATGTCTC  
ACCCCAACACCGCATCACTACCTGAGCTAGTCGCCCAAGTGATGCCGCGCGAGGG  
CGGATCTTGGCGCTGGAGGCAGCCCGTGTGAGCTGCCCGCTGCGGGCCACGGCACT  
CTCAGCCGCCGCGCTCGAGTCTCTGCTGTACACCCATAACGCGAAGGAGCAAATCCC  
GTGAGCCAAGCGCGTATCGATGAGTTGAAGGCAAAAATAGTGGCAGGCACTGACGG  
CATGGCGGACAAGATGCAGTTGTCCACATCCTCGGCCGAGACGACGCTCGTGCGTT  
CGTCAGACAGCTCCGGGCTCGTAGCCTGAGCACGCCATCTCTATTTCTCGACAAGC

AAGCCAAGCGCAACGTTGTCCTGCATGTGGGCAGGCGGTCTTTCCACCAACTGCAGC  
AGTTTTGCCC GGATCACTTCCTGATTCGGCAGCATGGTGATGAGCATGGGCAATACC  
GTTTCCACGACTAGCTCGATGGCATCGAGTCGTTGCTTGTTGACTTCCTGGTCGCTGA  
TTCCGTCTGTCATGCCTGTGCTCGCTGGAGGTGAGGTTGGGTGCGGCCGCCAATCCT  
ACAGCGGCGCGGGCGCCCAAGATGGCCGGCACATCACACCGCTGGATGACGCCCTG  
AGCGCCGGCGAGCTCGCCACGCTGGTAGGCCTGCCGATCTACAACAACGGCGACAT  
CGCCGACCTGTGCCTGACCGCCGACGAATGGGCGGCACTACCGAGCGCCGCCGCC  
GCGTGGGCTGGCCGCTCAACTTCCTGGAGGAATGTGATGCGACTGCCTGAGTCAATA  
CAAGGGGCTGGGACGAAGAGCGGCATTGCCGGCAAGCAGCCGACAACGTTATCGC  
TGAGCAGATCAGCTCTTCTGCGGAAGTCCAGCAAAGTGCTTGTTCCAGCTCTCCATA  
TCGGTGCCGTAAGCCTTTTGGAACCGCTCGACCTTCACCGCGGCCAGATGCTGCTGA  
GTGTCCTTGATGAGCTTTTCCTTGAATCCTTTTCGGCAGACCCTCCGTGGTTGCTACGG  
TCTCTAGTAGCGCCAGCAGTGTGGTCTCTAGCCTGGCAACTCGGCTGTGCAATGCGC  
TCAGTGAATCGGTAACCGGATCGTTCATGTCGCCCTCCTTGCGGGCTTTTGTTGGTGC  
CGTGGGGGTTCCAGCATATCGCGGGGAGGGTGGCACCTATGCGTAAGCCCAGCCAA  
GAACTGGTGCTTGATCGTATCCGCCAGCAGTGGGAGCGGGGCGCGCCTGCGCCGAC  
TGCCTCAACCATGCCGGGGATGCTCCGCAACGCGGTTGCGATCGCCTTGACCGTTGC  
CGGCTGGTCGCGTTCTGCGCCGGCTTGCTGGGCAACAAAGAAGACGGCGACAACG  
GCACCGACGCCGGTGCGGATGTCGTACCGGCGCAGTGCCTGAATTGCATGTGGGT  
GGGGCTTCCTTGATGCCGAGCATGGTGCTGCAGATGCGGAGCCCCGGCGCATGAAG  
GACGCCCCGTCAGTTTCTGCCGCCAGGCAGTCGGTGGTCTACGCGCACACCCGCCGC  
ATGCTGGATGCCACGGCCTGCAACTACACGACGTTCCGCCATGCAGGTGGCTGAGCG  
CTACCTCGCGACCACGGCACCCGACGTGCGGCAGGTAAAGCTGCGCACGGGTGAGG  
GCATGGAGCTGATCAAGGCCATGGAGAACAACGCCCAGATCCTGCGGCGCTACATG  
GACGGCACGGTCAAGACCTTGCCGGCAGATCTGGAAGACGCGTGGGTGCTGAGCCT  
GCCGGAGCCGTACCGCAGCGATTGCGAGCAGGACCTGGCGCGCCGGCGCGGCATGC  
TGGCTGTGCCGATGCCCAGCGACGAAGGGATGCAGGTGGCGAGTGTGTCCACGCTG  
TTTCAGGAATATGGCGAGCTGGTGAGCGCGCTGGCTCCAGCGGTGGCAGATGGCAA  
GTTCGGCCCCGAAGACCGTCAGTACGCCGACCAGATCGGCCGCAAGGGCGACGATG  
TGATCGGCGCCGTGATCGGACTGAAGCACGCCCTGCGCCAGGGCATTGAAAGCGGG  
GCCGCCAGTGCTTGAGATGACCATCTACCGCGCGCCCCGGGCACCACACCCCGCCG  
GCCGCAGGACCATCAGCCCAGTCGCGCGGCAGCACATGGATGAAGCGATGCGCCTG  
CTCTACGACAACGCACCGGGCCTGAGCGGTGATGAGGCCCTCGCCGAGCGCGAGCG  
GTTTCGTGCGGAGGATGAGGCGAGGACAGATCCGCAGGTTGCGTTGCCGCTGGAGC  
TGCAGCCATGAGCGTGAGCCGTTGCATCACCCGTGCGCTCGAAATCGGCAAGCACC  
CGCGTCAGCAGTGGAAGGACATGATTGCGGGCCCTCCCGGAGGCGTGCCAGCACACC  
AGCATCTGCACGGGCGGCATCGGCTGCCGTGAGCGTATTGGTGACTACCTGCGGGTG  
CAGTACCGCGCGCAAGTGCGCCTTGAATCCATCAAGCGGGCAGGTGGGCGATGAGC  
GAGCAGCGTCACGACGTTGAGCGGCTGAAGGCGGCCGTGGATCTGGCCGCAAGTTGT  
TGGCCGATACGTGCAACTGCGCCGCGCCGGCAAGAGTTGACGGGGCTTTGCCCGT

TCCACAAAGAGTCTTCGCCCTCGTTCACGGTGATCCCCGGTAAAGGGTTTGTGCATT  
GCTTCGGCTGCGGAGCGCATCACGACGTCATCGGCTTCCTGATGGCGATCACCGGGT  
GCGATTTCCACGAGGCCTGCGTACAGCTGGGCGCTGAGGATTTCCACCATGCGCGCG  
ATGGTGTGCAGGTGGAAATCGACGCGCCGCTCGATGTGACCTGGGTGCCGCTGATG  
CCGGTGCCGGACGATGCGCCGGAGCTGATGTCCGGCAACGGCTGGACGGTGCCAAT  
CTGGAACCCCAAGCGCAGCCGATTGCGGCGCATGCGGGTGGTGCGTGCCGATGCTT  
ATCGGGATGCCGAGGGCCGGCTGCTGGGCTACGTGTTGCGTGCGGATATCACGGAC  
CGCACCACCGGCAAGATCGGAAAGTGACGCCGCAGGTGACCTGGTGCGTTGGGCC  
GGATGGAAAGCGGCAGTGGTGCATCCAGCACTTCCCGACGCCTCGCCCGATCCATG  
GGCTGGATGCGTTGGCCGCCAAGGCGGATGCCGACGTGTTGCTGGTCGAGGGCGAA  
AAATGCCGCGCGGCTGGCGCTGGCGCGTGGGAGCGCTATGCCGTCGCGTCGTGGGC  
AGGTGGCAGCAATGCGGTGCCCAAGACCGACTGGCGGCCGTTGGCGGGGCGCAATG  
TCGTGTTGTGGCCGATGCCGACGCGGCGGGGCGCAAGGCGATGCTGGGCTGGCGT  
AATGATGCCGGCCACTACATTCCCGGCCTGGCGCAGCTGGCCATTCGCGCCGGCGCA  
TCGAGCGTGCGGCTGATCGATAACCGATGGCATGCCTGACGGCTGGGACATCGCCGA  
CGCGTTGGAGCGTGATGGCTGGACGCCACGTCAGCTGTCGGCCTGGGCAGCGGGGC  
GGGTGATTGAAGTCACTGTGGTGCCAGGCCATGCGCAGTGACACCACGCAACGCGA  
CATCTGGCGCGATCGCCAGCCGACCGCCAGTGATTGGCGTGCTTCAGCTGAGGCGG  
CGCTGCGCAATCCATACGAAACGCCGGAGCGCTGTCAGCGCCGGTATGACTACTGC  
CTACAGCAAGCGCGACGCTGCGAAGAGGGCGAGCGGGGATGACATTGACCAAACG  
TAAGACGCTGACCGTTGTGGACGGCGGGCTGGGGACTGCGCCACCAGGTGGCGGTG  
CGAGCAACCCGGATGCATGGAGGCAGGGGCTGACGCGCACGCGCGATGGCAACGTC  
GAAGGCACCCTGCACAACCTGATCTTGATCCTGGAGAACGACGAGCGCTTCGCTGG  
CCTTTGGTGGCTCAACGAATCCAGCAATCAGGTTGTTCTCTCGCGTGATCCGCCTTG  
GAATGGCGGCAACCGCGATGAGTTCACTGATGCCGATAGCTGCGAGCTGGCGGCCT  
GGCTGCAGAACCCGGACAACCTACTGGGTGAAGTGTGGCGATGAGACGGTGCTGAAA  
GCGGTGATCGCCGTGGCGCGCCGGCATCGGCGGCATCCGATCCGTGAGTACCTCAC  
GGCAGTGAAGTGGGACGGTACGCCGCGCGTCGAGCGGATGCTGATCGACCTGTTTG  
GTGCGCCGGATAACGCCTACAGCCAACGCGCAGCGCAATGTTTCGCGGTGAGTGCA  
GTTGCGCGTGCTGCTCTGGTTTCGACGCCAAGCAGCCATTCGTTGGCGCCCAGGTGAC  
TTCATGCTGGTGCTCGAGGGCGAGCAGGGCAAGCGCAAGTCGAGCGCGCTGCGGGC  
GCTGTTTCGGCAGCAATTGGTTTGTGGAGACATCCGAGTCGCCCAGCGGCAAGGACTT  
CTATCAGGTCATCCAGGGCTGCTGGGGCGTTGAGATCGGCGAGATGGACAGCTTCTC  
CAAGGCCGACGTGACCAGCGTCAAGACCGCGATCACCCGGCGCGTGACAAAGTTTC  
GCGCGCCGTATGAGCGGGTGCCGCGTTCGTATCGCCGCGAGTGCGTATTCGCCGGCA  
CCACCAACGAGCATGAGTATCTGCGTGACCCGACTGGCGGGCGGCGGTTCTTGCCGTG  
TGCGCACCGATGGCGAGGTGCGGCTGGACGCGATTGCGCAGCAGCGTGATCAGCTA  
TGGGCTGAGGCCGTGGCGATGTTTCGATGCCGGCTTTGAATGGTGGTCATTGCCCGAG  
GACGCCGCTGAAGAGCAGGAAGCCCGGTACGTTGGCGATAGCTGGGAGGGCCGCAT  
TGCCAAGTGGCTCGCCGGCAAGCTGGCAGGCGAGCAGTCCTATCCGCCAAGGGTGA

TGCCGGGCATGCGGATGGAATGGACGACCACCGATGAGCTACTGGCCTATGCCATC  
CGTGCCGACGTTTCCAAACACGGCCGCCAGGAGCAGATGCGCGTGTCTGCTGTCATG  
AAGCGACTGCGATGGTCCAGCGAACGGGTGATGGTCGATGGCTACCGGGAGCGGCG  
CTGGGTGCGCGCCAGCGGTGACATCGCGCCAGAGCCGCAGCCAGCAGGAGGGCGACG  
ATGCGCCTGATTTCTGACCGGTTGCCCCGACCTGCTGAGGCCATTGCCCCGACCTTTGC  
CCAACCTTTGCCCAACCTCAATGCAGACGCCGCAAGGCGTTGCCCCGACCTACCCAAC  
CTAATCGCGCGCGCGTACATAGAAATGCAGCCCTCTCCTTCATTCAAAACATCTCAA  
TCAGGTTGGGTAGGTCGGGTAGGTCGGGAAGAGTCAGCAGCGGCAACGGTTTCGAG  
CTGCCCAACCTCTGCCCAACCTGCCTCATGGTCGGGCAATGCGACACGGTGCCTCAT  
CCCAAACCTATGGCGGAACGGGCGACGGGTCCTCCTGGGCTTTGGCCATCTGCGGGT  
AATTCGACCCCCACTTTTCATGCATCTTTCGTTCCGGGCTTTGGTTCCGAACGGAACA  
GGGATGGCCGCATGAGTTCCGAAACGATGACCGCAGCCGAATATGCGGGCCACCGG  
AACTGCAGCGATTCTACATTCGCCGCATGCGCCGTTCCGGAAAGCTGGTCATGCAT  
GCCGATGGGAAGCGCATCAACGTCGCTGCGAGCGATTGCTGCTGGACGACATCAC  
CGACCCGCTGCGCGGGCGGTGATCGCACCGCTGGCGCGGCTGACCGCCTGGAGGGCGC  
CTGTGTCCCGCGTGCCGCAGGGCGACGTGCCAGCGTGCAGGAAGCCGTGCGCCGC  
GAACGGCTGGCGCGGGCGCGGTTGGCAGAGTTGGAAC TGGGCGAGGAATCGCGCGA  
GCTCACGCGCACCAAGGTGTGGAACGCGCGGTGTTACGCTCGTGCGCCAGGCGC  
TCAACAACATGATGAACATGTCCGCGCGGTTGCGCGCCAAGCTGGCTGCAGAGACG  
GATCCACGCGCCATCGAGGCGCTGCTGGATGCAGAGGTGCGGCTGATCGCACAGAC  
CATGCAAAAGGAGGCGCGTCAGTTGCTCGCACCGCCAGGGCAGAGCCGGGAAACTG  
ATGCGGAGGATGCCGCGTGATGCTGGACCTCAACGCATTCGACGTGGAGCTGGCCG  
ACCCGCAGGAAGTTGTCTGCGACGCCTGGTCGCGCGCGTGGAAC TGGCGCCGCGC  
CAGACGGTGAGCGAGTGGGCCGATGCCAACCGCATCATCGCTAAGGGCTCTGGCGC  
CGAGCCTGGCCCGTGCGGTACAGCCGCAACCCGATCCTGCGCGAGATCATGGATT  
GCCTGAGCGACCACTCGCCGGTGCGGTTGGTGGACTTCATGAAGTCCGCGCAGATC  
GGCGCTACCGAGATCGGCATCAACTGGACCGGCTACGTGATCGACCGCGGCGCAGA  
CTCAATGATCGTGGCGCAGCCGGTGAAGGATCTGGCGCGCAGCTGGGCGGCCTCCA  
AGTTCGACCCGGCGGTGATGGAGATGCCGGAGCTGCTGGCCAAGCTCAACACCGAC  
AACATGCTGGAAAAGCACTTCCCGGGCGGCACGCTGTGGGTGATCTGGAGCAACTC  
TGCCAAGCAGCTGCGCCAGCGCACCGCGCGCTACATCTTCATGGACGAGGTGGACG  
AATACCCGAAGGATATCGGCGGT CAGGGGCCGGCCGATCAGCAGCTGGAGGCGCGT  
GCCATGTCTGACGGCGACCGCGCCAAGATCTACCGCGCCTGTACGCCACCATTTGCC  
GGTGCCAGCGCCATTGAGGCCGGCCACGCGGCCGGCGACCAGCGCGTGTACATGGT  
GCAGTGCCCGCACTGCGCCGGTGAGCAGACCCTGGACATCGAGCGCCTGCAGCCAG  
ATGGCACGTTTGCCTGCGCCGTAAACGGGTGCGTGATCGAAGAGCACCACAAAGAT  
CTGATGTTGCTGAGAACGGCTACGGCGGCACCGCCTACTGGAAGCCCACTAACTCT  
GCGGCAGATCCTTATCACCGCAGCTACTACGCGTGGGCCGCCTATGCGCCGCTCGGG  
CTTGGCCCGTCATGGAAGGACTTGGCCGATGCACACGCCGAAGCCGAGCGCGACCC  
GAACAAGAAGGCAGGCTTCCACAATCTGAAACTTGGCTTGCCCTACGCTGGCGAGC

GGCAGGAGCAAAACGCCGACGAAGTGGCCAAGCTGGGGGAGCCCGGTGTGTTTCGC  
GGCATCGTGCCGATCGGTGGCTTGGTGCTGACGGCTGGCGTGGACTTCCAGCACGAC  
CGCGCCGAGGTGCAGATCATCGCCACCGGGCGCGGCCAGCGTCGTTGGGTGGTGGA  
TTACGGGGTGATCGATCTGGATCCGACCATTCTCGACACCTATCCCGCCCTGGATGA  
ATATCTCAGCGGCACCTGGAAGACGACGCGCGGCGTAGACATGCCGATCACTGCGG  
TAGCGCTGGACGGCGGTAACCTGGACAGAGACGGTGGCGCAGTTCGTCAAGGGCATG  
GTGGGCCAGTCCGGGCAGGCGCGCATCGTGCAAACGCTCGGTGGCTACATCAAGCA  
AACCGTGTATCTGATTGCGGGCCGCAACGAACGCAAGTCCGAGCGCGCCGTGTATC  
GCCCCGTCCAAGACCGAAGTCAATCAGCGCGACAAGACAGTGGCGCGCAGCGTTGGC  
GTCTGGGGCGTTGGTACCTCGGTGCTCAAGCACATGGTGTACGGCTGGCTAAGCGCG  
GCTGTTGCGGCAAAGGAAAAGGCCGACGCTGAAGGGCGCGCAGAAGAGATGGAGG  
CGCGCATGCTGCGGTTTCCGGGTGGTCGCGGCGATGAGGTGGCGGATCCAATCAAC  
CCGGATCCGGGCGCGTGTGTTGCCGGCTTACTACAAGGGGCTGACCGTCGAGTTCTAC  
GACAAGGAATCGGGCTACTGGATCAAACCCAAGGGCGCGCGAAACGAGCCGCTCG  
ACACCGGCGTCTACGCGATCTGGGCATCGCTTGCTCCTGCGGTAAAGGCCGATGTGA  
TTCGCGACTCGCAATGGGAGGCCCTTGGAGCAGCAGTACCAGCCAGCTGCGCCTGGG  
CTGTTTCGATGCGCCGCAGGATTCCCGTGAAACATCGACGCCCCGCTGTGGCGCCGAGT  
CAGCCAACGACGTTGGATTCCCGTGGAACGCAAACGCGTCCTCGCGCCGGTGGTTTC  
GCACGCGATGGTTGGGGACTCTGATGGCGCGCCCGAGTGAATCAGCCGAGCAGCTG  
CGCGAACGCATCCTGCGCGCTATGCAACGGGACATCGGCATCAGTGAGCATATGGC  
GCAGCCGTTTATCGAATCGATCATGCGGTGTTTCGCTGGTGAGCAGCCTTATTTCCCC  
TCCGTCGTACGGGAATATCCGGTGCTGCTGATTTCGTGCCGCCTTGGAGCGCGGGCGAC  
TCAGTCAAAGCTGTAATGCGCAGTTTCGATATCTCCCGCTCGAAGTTGCATCAACTG  
TTTCCGGGAGGCCTGCCAACGCGTGAAAATCGGGGGGTGTCCACGGTTTCAATGAA  
ATCAGCGACAAAATAGTTTTTCGCCCTTACGAATCAGTTACTTATAAGGGGGTGTG  
TCCACGGTTTTCATTTAGTTCGTGGACAGTCCGGTCTATAGCCTGTGTATCTATGACGA  
CCGCACAGGAAATGCTCACCTCCTACACGCAAGCAGAGCTTGCCGTGCTCAAAGGG  
CAGAGCTTTCGATTCGGCGAGCGCATGCTTACCCGCGCCGATCTGGCGGAGATTCGT  
AAGGGCCGCCAGGAATGGCAGGCCGCTGTCGATCGCGAGAGCAATGCAGGCCGCCG  
TGCTCGCTGGGCGACTGCCGATTTTGGCGGGCGCACGTGATGAGCAGTGACGCCCTC  
GCGCGTACGCGCCTGTCCACCGCACTCGCCGCCGACCGCGCCGTGCAGCTGGCGGA  
AATGCGCGGCAACGCCGCCGCTCCGGTCGTTTCGCGCGCCACGAGGTCACGCGCC  
CGTCGCGCAGCCGCAAGCTGGCGCGGGACTGGGGCAGTGCGAATGCCATCGCCGGC  
ACGGATGCGCGTCAGTTGCGCGATCAGGCGCGCCACCTCGAGCGCGACCTGGATCT  
GGCCGACAACGCACTCAACGTGCTGGTGCAAAACACGGTTGGCTCCGGCATCGACG  
TGCTGTCTGCCCCGCGCTTGCCGGGGCCAGGCAATCAACCGCGAATTGGCGCTGCAGC  
TGGACGAGCTGTGGGACGCCTGGTGGGACGCGCCTGAGGTCACCCGCACCCACGAC  
TACGGTGCATGCCAGCAGCTGCTGGTGCAGCTGGATGCGCGACGGCGAGGCGTT  
CTATCAGGATCTGGTGGGGCCTGTCGCGTACCTGGAACATGGCACCGCAGTGCCCTA  
CAGCATCGAGATGCTGGAAGCCGATCTGGTGCCGCTGGACTTCAACGACCCGGGCC

GCAACATCCTGCAGGGCGTCGAGCGCAATGCCTGGGGCCGTCCGGTTGCGTTCCAC  
GTGTACAAGCAACACCCCGGCGACCCGCTTGGCTGGAATACGGAAACCAAGCGCGT  
TAGCGCCGATGTGATGCATTCCATCGCAAACCTCAAGCGCCTGCATCAAGTGCGCGG  
CTTGAGTGTCTTCGCCAGCGCCATGTGCGGCTTCGAAGACGTCAAGGATTACGAAGA  
GTCCGAGCGCATCGCGGCCAAGGTGGCTGCGTCGATGACCTTCCAGATCAAGAAAG  
GCTCGGGTGAAACCTATGTCTCGCCGGGCGAAGGCCTGGGTGGCGTGGCGCTGGTG  
CAGCAGGGCACACCCATCCGCGAGTTGCGGCTGACACCCGGGCGCAATCTTCGACGA  
TCTGCTGCCCCGGTGAATCCATCGAGAGCCTTGGCAGCGACCGCCCAAACCCAAACG  
CCGCCACCTGGCGCAAAGAGCAGTTGCGAGCTGCTGCGGGCGGCATCGGCGTGAGC  
TATTCAGCCTGTCGCTGGACTACAACGGCACGTATTCCGCACAGCGACAGGAGCTG  
GTGGAAGAGTGGGGCAGCTATCTGATGCTGGCCGAGCGCTTTATCGCGTTGGGTGTG  
CGGCCGAGCGTCAGCGTTTCGTTGAGGCGGCGGTGTTGGCCGGCAAGGTGCGCTTG  
CCGCGCGGCTGGTTCGCTGCGTCATCTGGCGGCCTCCACGTACGTGCGCCCGATCATG  
CCCTGGATCGATCCGCTCAAAGAGGCCTACGCCAAGGGCGAGGCCGAGGATCGCGG  
CTGGGTCAGCCCGCAGCAAAACACGCTGCAGTACGGCAATAAACCCGGACGAAGTGC  
TGCGCCAGCGTCAGGACTGGCAACAACAGCAACAGCAATTGCAACCGGCCACGCCG  
GTCACACCGCCCGAGGCTCGCGCGCAACTGCGCGCGGCTGTGTCGCGCGACATGTT  
GAGGAACGAAGAATGATGCGCACCCATCGACTCACCACCGGTATGCAGCTGGTTCT  
GGCGGACGCAGGGGGGCCAGGCACTCGGCCCGTGCTGCTCAAGGTAGAGGCGCGTG  
CAAATGACGTTGCCGAAGTCATGATCTACGGCGACATCGGCGATAGCCTGTGGTG  
GAATCGGTCTCTCCGCTGGAGTTGGCCGAGCAGATCGGCCAGATCACGGCCAGCAC  
CATCAACGTACGCATCAACAGCGGGCGGCGGTGTTGTGGCCGATGGCATGGCGATCT  
ACAACGCGCTCAACCAGCACGCCGCGCGCAAGGTGGTGTTCATCGATGGCCAGGCT  
GCCTCGATTGCCTCGTTGATCGCGATGGCTGGCGACGAAGTGGTGATGTACGCCAGC  
TCTCTGATGATGGTGACGCGCCGCACACGATTGCCGCAGGGAATGCCGCTTCTTTC  
CGCCAGTACGCCACCGCCCTGGATGCTCATGCAGGCGCGATGTTGGAGGCCTATGCC  
ACCAAGACCGGCAAGCGCGAGGACATGGAACGGCTGCTCACCGACGGCGCCGACC  
ATTGGTACACAGGCGCGCAAGCGGTGGAGTTCGGCCTGGCCGACCGCGTTGCAGAA  
AGTGCCGCCACAGCGCGTGCAGAGGCGGCGTCTGTTGTGCTCTGACCGGCTACCTG  
CAAGCCATTACCCAAGCGCCGGCATCGGTTGCTGCGCAGTTGCGTGGCCACATCGTC  
GCCGCGCTCAGCCCCAGCGTATTGCCTCTCTTTCCGAGGTCACCCAAACGGCCGTT  
GTTGGCCATATCGAGGATCCCATGATCAAACAAAACCTACCTCCGCATCCTCGCCAAC  
GCCGGCGGCGGTGAGGTGCAGCCACAACGACCACCACACAACGGCGGCCCTGC  
AACCGCAGCTGCTCCGGTCGTTGCCGCCGCCCTGATGCGGCAACTGCCGTGCAGGC  
CGCGCTGGTTGCCATGCGTGGCCGCAACACCGACATCATGGCGCTGGCCGAGCCGC  
ATATGGCCAACGCCGATATCCGCGCCTATGTGGATGGCGTTATCGCGGCCGCTGATC  
CGGCAGTCACTGCCGATAACGTGGGCCGACACATCCTGTCGTTGATGGCGCGCAAC  
GGCGAGCCGCTCAATGGCCGTGCCGGCGTCATGGCTGGCGGCGATCAGCGCGACCA  
GACCCGCGCGGCGATGGGCAACGCCATCCAGGCGCGTGTGGGCCTGGTGCAGGCGA  
CCGACGGCAACCCGTATCGCGGCCTGAGCATGACCGAGCTGGCGCGTGCGTGCGTG

GAGTCGACCGGCACCAACACGCGTGGCATGGACCGCTTGCAGGTGGTGGGCCTGGC  
CTTTACGCACAGCACCTCCGACTTCCCGGCGCTGCTCGGCGATGCGGGCCCGCCGCGC  
AATCCTGCAGGGCTATCAGGAAGTGGAAGAGCAGTTCGACCAGTTCACCCGCGCGG  
TGAACGTGCCGGACTTCAAGCCCACCAACCTGGTTGGCCTGGGTGCCTTTAGTGATC  
TGCTCGTTGTGCCAGAGGGTGGCGAATACAAGTACGGCACCTTCAGCGAGCAATCG  
CAGGCGATGAAGATCGTCACCTACGGCCGCCTGTTCTCGATCACCCGTCAGGCCGTC  
ATCAATGACGATTTGGGCGTCTTCAGCGACGTGCCGCGCAAGATGGGCCAGGCCGC  
CAAGCGCACCATGGCCAAGTCGGTGTTCACCTCATCACCTCCAACCCGGTGCTTGC  
CGACGGCAAGACGCTGTTCCATGCCGACCACGGCAACCTGCTGGCCGGTGCCGGCA  
TCACCACCGAGAGCGTCGCCGCGATGCAGGCGCGCATGGCGCTGCAAAAGGATACG  
GGCGGCAACATCATCCGCGTGCCGATGAAGTCGCTGCTGGTGCCGGTGGCACTGAG  
CGGTGCAGCGCTCACCGTGCGTGCCAGCCAGTACGAGGTGGGTGCGGCCAGCCGCG  
CCAACACCACGCCGAACATCGTGCAGAACACCTTCGATGTCATCAGCGATGGCCGT  
CTCGATGCCGTTAGCGCCAACGCGTGGTACGGCGTCGCCAACTCGGCCTACGTGGAC  
AGCATCGTGGTCGGCTATCTCGACGGCAACCAGACCCCGTACCTGGAACAGCACGA  
AGGTTTCACCGTGGACGGCGTGGCGTGGAAGGTGCGTCTGGACGCGGGCGCCCGCG  
TGGCCGACTACCGCGGCATCTACAAGAACCCGGGCGCGTGATTGCGCGCGCGGCGA  
CGCCTGTCGCCGCGCTGCCGCATGTCTGATCCCTCTACTTACGTCTCCGGAGAAACC  
GCATGAAAAACGCACATCAAGATGGTCGTGTGCTCGATGTCACCCTCACTGCTGCCG  
TCAAGAGCGGGCAGCTGGTTGTTCTTGGAAGCTGATTGGTGTTGCCGTCACCGACG  
GTGACATCGGCGACACCATCGCCCTGCACGTGGAAGGCGTCTTCGCTTGCCCAAGC  
TGGGCACCGCCGTGTTTGCCGTTGGTACGCCGGTGAACCTGGGATACCGGCAATGCGC  
GCGCGATTGTCGCGGCTGGTGGAGCCGGCGCAGCTAACGGCATCGGCTATGCCGTT  
GCAGCTGCTGCCAACGGCACCAACCGAGCTGCTTGTGCGCCTGACGCCTGGCACGGC  
CACGGCCGGCGCGTAACCCCTCGACCACCCCGCACGCAGATGCCCGTGTGGCGCGT  
GCGTGGGTGGGTCTTCTCATCACTTTGAGTACTGCAACCATGTCCAGGCCTCGTGGC  
GTGCGCAACAACAATCCCGGCAACATCGATCGCACCGGCACCGTCTGGCAAGGTGA  
GGATCGCACTGCGTCCGCTGTGGCGCGCGAGTCGCGCTTTGCGGTTTTCGATTGCC  
CGAATACGGCTTCCGTGCCCTGGTCAAGACGCTGTTGACCTATCAGCGCAAGCACAA  
CCTGCGCACCGTGCGCGGCATCATCAATCGCTGGGCACCGCCGGTGGAGAACGACA  
CCGGCGCTTATGCGCGCCAGGTCGCCACGGCGCTGGGTGTGGATGTGGACCAGCCC  
ATCAGTGTGGAGGCGCCAGCCACTGCGTTTCAGTTGGCCAAGGCCATCGCCAAGCA  
CGAGAACGGTGGCAACTTCTGGGGTGACGAGGTCATCTGGGATGGCGTCGAGCTGG  
CGGGTGTGCGTCGATGATGGATGGCGGGCGCCACCGTGCTGCTCAAGTCGGCCGCGC  
TCTTGGTAGCCACGAGCGCCGGCAGCGTGGTGGTCACCGACGTGATCACCGGCAGC  
GAGCACTGCTGCTGGGGATTCCGCGAGTCGTGGTTCCTGGCGGCAGTGGTTGGCGCG  
CTACTCGGCCTGATGGTGCTCAGCGAGATCGACGTGGGCAAGGTCTCGGCGCCCAG  
CGGCGGGCCTGGTGTGCAGTGGCTGACGTTGCTGTTGCGTGTGGGCTTGCTTGGCCT  
GTTTCGTGCTGGGCTTCGCCCTGGCTGCCGGCTGGATCGTGGTGGCGCTGGCCAAC  
CTTCCCTCCATCCACCGGATCGGGATCGCGGCAAGCGGGTTGAGCGGTTTCATCAT

CAAACCAATGTTGCCGCACTACCTGGCCGCCCTGCAGAAATTGTCCGACCGCCTGGC  
CGGCCGTTTCGGGAGGTGGTGCATGACTCTCTACCTCCTGAGCCTGGTCAGCACACTG  
GCGGTGTTCTGCGCCACCGCATGGCAGCTGCTGCACACATTCCACCTGGGTGACCGC  
GCAAGCGATCGTGCCACCTGGGCGTTGCGGGGTGCCTGCTTTATCGGCCTGGCCGTG  
GGCATGCTGGGCATCTTCCTGCGCGATCTGGCGCAGCACACGGGCACACCCTGGTAC  
GTGCTGCTGGTGCGCGTGAGCCTGACTGTGTTGCTGATCTACCCGTGGCGTCGCCGG  
GAGAGCGAACGATGAATATTTTGGCCTTCCTCAAGGCGCTGGTGGCGCTAGTCTTCG  
GCTGGGCGGCCGATGCGCTGACCTGGCTGCGCAAGCCGGGTAGCCGGCTCAAGGTG  
GTATGCGCGTTTCCTCGTGCGCTGCTGTTCGATTGCCGCGCTCACGTCCTATCGCAAG  
GGCCAGCAGGTGATCGTGGTGACGCGCCAGGTGAGCAGTGCCAGAGCGATCGCAC  
GGCAGCCCTGGAAGCAGCGCAGCTCAAGCGCGCCGAGTTGGAGCGCAACAACGCCG  
ACAAGGACGCCGCGCTGGCCACCATCGCCGCCAAGCTGCAAGCCGAGGCCGAAAAG  
CTGCGGCTCCTGCAGGAGCGCAACGCCGGCCTGCGCGACAAGACCGAGATCGCCAA  
GGCAGCGGCTGACCGCAGTGCCAGGGCGTTCAAACAGGAATACGACCAACGCCCGG  
CCGAATGCAATGCGGCCTTGCAAGGCGCTGGCTGCTGCGTGCCCAAGCCTGGGAGGC  
TACTGATGCTGCGCTCTGTGTTTCGTTATCGCGCTGGTCGTTGGCTTGACTGGCTGCGG  
CAAGAAGGGCGTCACGCGGGAAGATCCGGCACGCCCTGTGGTTCGTGGCGCCAGCGC  
CGTCCGTGATTGCCGTGCCGGTGCGCACCTTCGTGCAGATCGAGCCGCGCCTGACGC  
AGCGCTGCGCCTGGGTCAAGAACGGCACGCTGGAGCAGGTGCTGGACGTCTCGCGC  
GGCCGCAAGCGCTGCCTGGAGTTCTACGAAGCCAACCTGAGTGAGATCGAGCAGGT  
GCAAGGCACGCCGGCCGGCGGCAGCTTGAGCCGCGATGAGCATGTTCCGCAAGGA  
CACCACCGTCGACTATCGCGCAGGCGCCGGCAATAGCGGCATCAAGATCGACGTGG  
ACGCCGACGACTTGCTAGGTCGGAAGTTCAGCGAGTTGGAGAAGAAGAATCTCCCT  
TTCGCGGTGATGCAGGCGGTCAATGCCACCGCATATGAAATCCGTGAGAGCTGGAA  
GCTGGCGGCGCTTCGTGTGTTTCGATCGGCCAACGACCACCACCCGTAATGCGGTGTT  
GTATGCAAAAAGCGACAAAGGAGCGTCTGTACGCACAGATCTTCCTGCGCAACGAAG  
CGCCGAAGGGAAATGCGCCCCGACAAATATCTGGTACCGCAGGTGCTGGGTGGCGTT  
CGCGGGAAAAAGGGGTTTGAATCCTGCTGCAGCAAAAAGGGCTCATGCCGGCTGG  
CACGTTTGCCATTGCAGGACGTGGCGCCAAGCTGGACGCCTATGGCAACGTGCCCCG  
GGAGCACGATTACGACAATCCTCTCGCAACTGAGTGCGCAGCGGGATGTTTCATCAGT  
GGGCCACGAAAGAAGTACGTGGGCGGCTCACCCGTGAGCGTAGCCGTTCCGATTAC  
TTGGGCAAGACCCGCCTGGGCACCACAGCAGTCATGCAGCGCACCGCACGGCGCGG  
TGGGCGCTACTTCGAGATCAAGAGTCAGCGCGGCAAGTTGGCGCCGGGGATCTACG  
AGCGCATCGGCACCGGTTTTTGGCAGCGCCGTGCGCAGCGTGTTTGTCTTCACCACGC  
GTGCTACGTACCGGCCGCGTTACGACATCTTCGCACTGGCGCAACGGCAGTGGGAC  
AAGCTCATGCCGTTCTACTTCAATCGGGAGCTGGAAAAGGCGCTGCAATCGAGCAT  
GTATCGGGTGCGCGCATGACCCAGCGCCAGTTTCTCGAAGCGTTTCGATGCGGATGCC  
TTTGCCGCATTTGCCGATGTCGGCATGGCCGATGCGGCCGCCTACCAAGCACCGGGT  
GCTGATGTCTCGGTGCCATGCACCGTGAGATCGACCGCAACGTGCGCGACTTCGGC  
GGCGACGTCATGCCAGTCAGCACCGGCTACACGCTGGTGACGTTCCAGCGTGAGA

AGTCGAGCCGGCCAAGCGTGGCCGCTTGGTGCTGCCAGGCGAAACGCTGGTGCTGG  
CCGAGCGAGTGCGCCAGGACGAGTCCATCAGCCAGTGGGTGGCCGACCATGGCTAG  
CCCACGCGAGACATTGCGCGCCGCGGTGGGTGCCTGCTTGACGCGCATCAGCAGTG  
CCGATGGCTATCAGACCGAAGCCGGTGCCACGTTCACTCTGGAGCCGGGCCAGGTC  
GACGAAGACGCCACTGCCGTGCTCACGGTGCTGGTGGCCAAGCAGGAGCGCGCCAG  
TGATGTCGCGCTGATCCGCACCCATCGCCTCACCACCTTGGTGATCGTCATCAAGGT  
GCCTGCGCCGCTGGATACAGCGCAGGCGCGTTTGGACGCGGCCGTGGCCGATGTCG  
AGCGCGCGATGGCGGACCAGCAATTCCGCTACCCGCCGGGCATGCAGTTTCCGCAG  
TACGTCTCCATGGAGCCGGTCAAGCCGGAAGCCGGCATGAGCTGGGTGCGCGCGCT  
GCTCACCTACCAATCCCACATCCCCATTACCTGACGCCGGCAGCCGGCACTTACGAG  
GACACCATGCCCATCAATTCCCCTGACTACAGCTATCTCGGCAGCGGCGAGATCCAC  
CTGCGCAAGCGTGGTGCGGCCAAACCGTTCCGCGGCATCGGCAACTGCTCGGCCTTC  
AGCTTTGCGCCGCGAGACCAACCGAATCAACCTGCTGGACAACACACAGCCCGGCGG  
CGGTAATCGAACTCGGTGGATCGCGTGACCGAGGTGCAGGTGAGCTTACCATGC  
ACGACTTCAGCGCGGACAACTTCGCCGACGTGCTGCGCGGTACCGCCACCACCATC  
GTTGCCGGTGCGGCGGTGGATGATTTGGTGGTGGCCTACAAGGATGGCGTCACGCC  
GCTGCCCAACTTGGCGACCGACATCACCGCGGTGAAGCCGGCTACCGGATCGGCGG  
CGTTCGAGAAGGGCAAGGACTGGGACATCAAGAACGGCGCCCTGTACCTGCCGGCC  
GATTCGGCCATCGTGAGCCGGTGAGCGGTGCGCCGAACATCAAGGTGTCGTACGC  
GTTCGGCGCTGCCGAGCGCCTGCAGGCCTTGGTCAACCCGAACGAAGAATACGAGT  
TGCTGTTCTCGGCTTCAATGAAGCGCGCAGCGGTAAGAAAGTCCGCGCGCAGGCC  
TACCGTGTGTCCGGTGGCGTGATCGGTGAAATGGCGCTGATCGGTGAGCAATATGGC  
GCCGGCACCGTCACCGGCACCATCAACAAAGACACCAGCAAGCCGGCCGGTGTGTC  
GCAGTACTTCACCTGGGATGCCGAGAAGTGAGCGACGACACCGATATCCTGATGCC  
ACCCACCCGCGCGATCACTTTCCTGCGCCGAGCAGGTGGAAGTGACGCCGCTGACAC  
TTGCCCAGATCGGCCCTTCATCAAAGCAACCCGGCCGATCATCGGCCGGGTGATCG  
TGGCCGCGAGCCTGGTCAGTGACGGCGGCACCGTCGAGGTGGCTGCGCTGATGATG  
GATGTGCTCGAGCAGGACGCCGATGCCTTCGCAAAGGGCGGCGCTATCGTGACCTG  
CAAGCCGGAAGCATGGGTGCGCGGTGCCTCATTGGCAGATGCCGCTGCGCTGGTCG  
AGGCGGTGGTGGAGCTCAATGAAGATTTTTTCGGCCAGCGCCTGCCGAGCCTGATGC  
GGGCCGCCGGCAAGGCGATCGACGCGTTAGGAATGACGCAGGCGCAGCCGGCTGG  
GCCGACCTCATCCACTTCCTCGTCGCCCCGAGGCCACCAACGCCGAGACGTCTTGACC  
TACACCTTGGCACAAGCCAAAGCGTTCGCCGCCGCTGCTGTCCGTGATGACAACGAC  
CAGCTGCGGCAGCGGGAAGCATCCACCGCCAGCGCCGTGCGCATGGCAATGGGGTC  
GGAATCTGCGGCCTTTGCGAAATACCTCAGTGAATTGATCAGGTAAATGGCCGACCA  
ATCAGCAAATCTGCGCGTCCGCATCAGTGCGGACCTCAACGACATCAAGCAGGGCT  
TGGCCGTGTTGCGTGGTCAGCTGTCGGACGTGCGAAAGCAGGCCGGGCAGTCGCTG  
CCATCGAACAATGTCATCAGCCAGTTGGGCAAGACGTCTGGCCAGACAAGCCAGGC  
GCTGGCGCAGCTGCCGATGCAGTTACCGACATCTTTACCAGCATCCAGGGCGGGAT  
GCCGTGGTTCACGATCCTGGTGCAGCAGGGTGGGCAGATCAAGGACAGCTTTGGCG

GCATTGGCCCTGCGCTTTCGGGCGTCTCCACCGCAGTGATGGCGATGGTGAATCCAT  
TGACGGTAAGTGCCGCAGTCATCGCGGCACTTGCGCTGGCCTGGAAGCAGGGTGAG  
GACAGGTCGTTTGAGTTCAGTAAAGCACTGATCGCTACCGGTAATTATGCTGCCGCT  
TCTACCGGGCAGCTTGAAAGCCTGGTATCGAAGCTTGACCAATTGAATGGCGTCTCG  
CTGGGCGACGCTCGAGAAGCGGTACTCAAGGTTGCGGAGTCTGGCAAGTTCACCGG  
ACAGCAGTTTGAGCAGGTTGCTGCCAGTGCCGCGCTGATGAAGGCGGCAACGGGGC  
AGGCGATCGATGAAACGATTGCGAAGTTTGTGAGATCCGCAAGGACCCGGTCAAG  
GCGCTCCTCGAGCTCAACGAGAAAGAGCACTTTCTGACCCAGACGCAGCTGGAACG  
GATCAACACGCTGGTCGAGGAAGGCAACAAGCAACAAGCTGTGCCGAGGCGGTCA  
AGCTCTATGACGAGCAAGTGGAGAGCGTAGCGCGGCGCGCGCTTACCGATATGCCT  
GCAATGTCCAAGGCGTGGACAAGTGTCAAAGACGAGGCGTCTGGCGCCTGGGGCGA  
GGTCGAAAAGTATGCCGATCTGCTCGAACGCGTCATCTCGAAGCAGGATGCACTTG  
GAAATAGTGTCTGCTGGAAGAGGTTGAGCGCTGCATTGTCCAACCTCGGGTGGGGTC  
ATTGGTGGCCTTGCTCGTTACTCGGGCCTGTTGGACGAGGTTGCTGCGAAACAAGAG  
AAGGCTGAGAAGGGCGGGGCTGGCAAGACCATTGGCGCAGGCGTGCTGAATTCAAT  
GGGGCCGTTGAGCAGCCTCATCAAACCTATCCAGGGGCGCGTGGAAAGCGCGGCGG  
GTCCAGACTTCTCCAACGTGATCGCAACTGTCGATCGTGGGCCGGTGGTCGACTCGG  
AGCAAGCAAGCGCCAGTCTGAAATTCCAGGACGACACCAACAGCCGCTTGAGTAAG  
ACGCTTGACCTCGAGGGTCAGATCAAGCAAATGAAGGAGGATGCGGCGAAAGCGG  
GAGTTACTGACGCAAAGCTGCTCGCCGAGCGTGAAAAAGTAATGCGCGCCGAAGCG  
GCGGCCAAAGGCGCGAAGGGTGCAACAAGCCTCGCAACCGCTGCCCGCTCGGCCGG  
GCTGCAAAGCATCAAGGATGCGTTGACCACCGAGCAGGCGCAGATCACCACCAGCA  
CCAAGGTGCTGCAGGCGCAATACCAGGCGCGCGAGGTCTCGGCTGAGACCTACTAC  
CAGCGCATGCGCGAGCTGGCCGAGCGCGGCACCGCCGCAGAGGCGCAATCGCTGCA  
GAAGCAGATCGATTACCTCAACAGCCGCAACGTCAGCGGCAAGCAGTCGATCGACG  
TCAACAAGCAGGTTGGCGAACTGGAGGCGAAGCTGGCCAAGGTGCGCACGGAGGGT  
GCCGCGGCCCTGCAGGTGTTGTCCACCGAAGAGGGCAAGTTGAGGAAGCAGCGGGA  
AGACGCACTCGCGTCCTACCAGGCGGCACTCAATGCCAGCACCGATGCGTTGCAGG  
AGGACATGGATGCCATGATCGCCCGCGTTGGCGCAGGTGATCGCGAGTTCGAGATC  
CAGCAGCGGCTCAATGGCGTCTACAAGGAACAGGCGCAGCGCCTCAATGAGCTGGC  
TCTGCAGAAAAATGCAGGCCGCATTGACGAGGCGACGGCAGCGGCCGAAGAAGCC  
GCAGTGCGCGCTGCAACCGAACGGCGCGTGCAAGGTGATCCGCGATGGCTACGAGCG  
CATGGCGGAGGCGCAGGCCGATTGGGGCAGGGGCGCGTCCGGCGGCGTGACCAACT  
ACATGGATGAAGCGCGCAATGCTGCAGGCCAGGTTGAGTCTGCCGTTGGGTCTGCCC  
TGGGCGGTCTGGAAGATGTCTTCGTCAAGTTCGCTACCACCGGCAAAATGAGCTTCA  
GCGATTTGGCAGACTCGATCATTGCCGACCTCGCACGTATCGCGGCAAGACAAGCG  
ATTTCCGGTCTGATGGGCGCGTTGTTTGGTGGTGGCGCTTCGGCAGGCGCTGTCTCG  
GGGACGATGGGAACGTTTGGTAACAACATCAACGAGTTTATTCGTGGCAAGGCCGA  
TGGCGGATACACAGGGCCGGGCGGCAAATTCGAGCCGGCCGGCGTTGTGCACAAGG  
GCGAGGGCGTCCTGAGCCAGCGCGATATCGCATCGATCGGCGGGCCTGGGGCGTTC

CTTTCCTGCTCAGCACGATCCGCAGCGGACGTGGTTATGCAGCCGGCGGGTTTGTC  
GGCGGCGGCGCGTTGCCTGTAGCTGGGCGCGGCAACAACGTGAGCATCGAGATCCA  
GAACTACAGCGGGCAGCCCGCCACACAGGAGCGGCGGACCCAGCGAATGCCGGAC  
GGTCAGGAGCTGGAGAAGTGGTTCATCCGCATCGGTGCGGCCAACATCGCGCAAGG  
TGGGGAAATGGCGGGCGCCATCGAGAGCCGTTTTGAAACCAGGAGACGCCGTTGAT  
GGCTGCGTTTTCCAGCCTATGCGGGCATTGTTGTACGACACCGTGCGGCGCTCCTTCGA  
TCCGGCTGTCTTGCGCACCGAGATGGAGCGCGGCGTGCCCAAGCAGCGCGTGGTCA  
ATGATGGTGTGTTGGTAAAGCTGGCGATGACGCTGGACTTCGCCACACCGGCCGAG  
GCGATGGCCTTCGAGGATTGGTACTTCGACGAGATACGGCGCATCGGCTGGTTCGAC  
TTTGTGCATCCACTGAGCGGTGCCGCGCTGTCGGTGCGCTTCGAGAATGGCGGCATC  
GGAGAGCTGCGGCCGGTCGAGGGCGCAGATCGGCCATGGCAGTGCGACGTACCGT  
GGAGTACTTGCGATGAGCACGTTTCAGGAACGACGCCAGCGTGTACCGACGACGA  
CACGACCGCGCCCGCTGGAGCTGCTGGAAATGACAGCGCCATCATTCGGCGCGGTGC  
TGCGCATCTCCAACGACACGCGCGATTGGGTGAGCAACGGCAACACGTTTATCGGG  
GTGCCGTTTTCGCTTCACGCCTCCAAAGGATTTGGCAGGCCAGACGCCCCGCGCGCAG  
TTGGAGGTGGATAACGTGGGCGGTGGCATCACCGACGACCTGGAGCGCGTGACGCC  
GAACGAGATGGTGATGTGCCGCTATCTGATCACTGATCGCATGCAGCCCAGCGTGAT  
TGCGCGCAGGTTCTACCTGCCGCTGACGCAAGTGCGCGCTGCCGGCGCGTTAATCAC  
GGCGCAGATCGGCGTGGAATCTTCATGGGACAACAAGCGGTGAAGCTGCGCGCCA  
ACCCGCACACGCTACCGGGGATTCATGATGCGCACCTGCGAGGTAGAGCGCTTCCT  
AAACATCCCGTATGACGCAGACACCTACGACTGTGCGGATCTGGTGGTTCAGGTGCA  
GCGCGAGCTATTCGGCCGCGCTGTGCAGATGCCCCGACGCAGGCCGCGAGGTGCTG  
CGGGGCAGGTGGCGCTGGGCGAGCTGTGCGCTGCCTATGCGGTGCTGACCACCACG  
CCGGTCGACGGCGATCTGGTGCTGATGTTGACAAGGGCCAGACGCGGCCCGGGCA  
TGTCGGGCTGTTCTTCCACCTCGCCACGAGGGCTGGGTGCTCCATAACAACACGCG  
GCTCGGCAGCAGCTGGCTGCATCGCGTGCGCGAGTTGCCGGACTACGGCGCACGGA  
TTGAGGGGTATTACACATGGGCCTGATGACCACGCCTGCTACTGACGGCCAGCTGGT  
TCTGACGCCGCATCCGGTCACGCTGGACGGGCAGCGCCACATCGCGATGGACCTGA  
AGGTGGGCGAGCGCCTGTGCGAGTTTCTGCACCGGCACGTGATCGATCTGGACCAA  
GGCGATTGGACAGTGTCCATCGGTGGTCGGGTCGTGCCGCGCCATCTATGGGCTTGC  
GTCTACCCTAAGGATGGCCAGGTCATCGAAGTGCGTGCGCGGTTCGGTAGGAACGC  
GCTGTACATCGTTGCGATGATTGCGCTGACCTATTTACGTTTCGGCATCGCTGGCGC  
AGGCGGTGCCGCCGCCGCCGCTTTTGGCGGTGGCACGGCTGGCGCGATATTCGCCTC  
TGCCGTTTTTCGTGGCAGGCTCGCTGGTGATTAACAAGGTGCTCGGGCCGAAGGTAGA  
GAGCCCGGCAGGACCAAGCACCGCGGGCACGGTCTACAGCCTTGCGCGTCGCGCA  
ATCGGATGCGGCCCTATGAACCCCTGGGCCTATTGTTTCGGCCGCACGCGCATTGCGC  
CTGATATCGCGAGCAAGACGTACAGCTGGTACGAGGGCAACGACCAATATATCGGC  
ATGGTGCTCACGCCCCGCATCGGCGTGGGCGCGTGGAGGCATACAGCAACGCAGA  
CACGCTGCTGTCCAGCTACGAAGGTGTGAGCGTTTTCCACTCCGGCTATAGCCAGAT  
GCCGGAGCAGACCATCCCGTTGTACAGCAACGTAGATACGGTCGATGGAGGTGAGC

TGCCCCGACACGGCTGACTTCGTGACGCGCACACCAGCAGCGCGGACACCGTGCGTATC  
CAGATCAACCTGGAATACGTGCTGGGTGGGGTTGGCACCTCGGGCAAGGCATATAA  
CGTCTCCGAGACGGTGACAGGTGCAATACGCACCAACGGGCACCGGCATCTGGGCCA  
CGCTGGCCACGCAAACGTTACACCAGCGACAAGCTCGACGTCAGCAAGCGCGCCACG  
CTGTGCGGCAGATGTGGCAAAGGGCCAGTACGACGTGCGCGTGCGCATCCTTGGCTTG  
GGCAACTACGAAGGAGACAACAGCCAGCGCAACGACTTCCAGTGGTCGACCATGGG  
CAGCGTGCAGGCCGACACGGCGACGTACGCCGGTCTCTCGCGTACCGGCATCATCA  
TGAAGGCCACCGGCCAGCTCAACGGCCAGCCGGATGAGCTGCGTGCGGAGCACATT  
GCTGCACCGATCCCCGTGTGGCGCAACGGTACCTGGGTGAGCGAGGAAACCAGCAA  
CCCCGGCGCGCACATCCTCAAATACGTCCGCGGCTATTACGACCAGAGCGGCAGGC  
TCATCGCCGGTATGGGCAAGAGCGACGAGGAGATCGACCTCGAGTCGTTGCAGGGC  
TTCATGGGGCACTGCGAGGCGAATAACTACGCGTACGACTACTGGCTGTTCAAGA  
ACGCAACCACGACGAGGTGCTGCAGGGCGATTGCCCTGGCCGGCATGGGCCAGACCA  
CCTGGGCGCGGGGGGCGGTTGTGCGTTGTGTGGGCCGACAGCAACAGCCGCTTTCG  
GGCGTGGTCAACATGGCCGAGATGAAAAAAGGCAGCTTCAGCGTGGACTACACGCT  
GGCCAGCGCTGCCGACGGCATTGAGTACAGCTATTTTCGACAGCGCGACGCAGAAGG  
TTGAGATGGTGCGTGTCCCGGCGCCTGGTGTGACGTCGAGGCGATGCTCAGTCCGG  
CGCGCTTGACCGGGGAGGGCGTCAGCCGGGAGCAGCATGCGGCGGAGATGGCGCG  
CTACCACCTCGGCCAGAGCATCTATCAATACAAGGACATCGGTTTTGCGCAGGATCT  
GCAGTATCTGACGTACCGCCGCATGTCGATGCTCTCGATCTCGCACGACCTCACGCA  
GTGGGGTTTTCGGCGGGCGCATCGTCGCGGCAGAGCGGAGCGCGCTGCTGGGCACGG  
TCACGCTGACGCTGGACGAGCCGGTGCCGCCGCCGGATGCACGCAGTGCCTTCATC  
GGCCTGCGCATCCCCGGCGAGGCGGTCTATCGCACGTTCCGCGTGCGTAGCTTCACA  
GAGGCGACAGACACCATCCAGCTTGTGGAGGAATGGCCGGATGACGCGCCGCTGCC  
AGGCGAGGGGCTACGCCGATGCCATGGTAGACGGTGGCTGGCAGAACACCCGGCGC  
ACGACACGGTGTGGATTTACGACTTCAAGGCCACACCGGGCTTGCGAGTGCGCGTG  
GTGGCGATCGAGCCAGAGAGTGATCTGAAAGGCGCCAGCATCAGCGTCGTGCCGGA  
ATCGCGGGAGTTCTGGACCTACGTCAAGACGGGCGTGTACGTGCCGCCAGAGAGTG  
GCTCGTCGCTTGCCACGCGCCCCGATCGTCAGTAACTTGACCATCAGCGAGGACCAGA  
TCACCACCGGCGATGTCACTGCCACCGATCTGGTTGCCACGTTTCGACATCAGCGGCC  
CGTTCGATCACGCGGTGGTCTACGCCTCGGCGTCGGACGGCAATGGCGAGCTGGTA  
GAAGTGGCGCAGACGCGCACCCGCACGGCGCGGTGGCGCATCCCGCGAGCCGGCAC  
CTACACCATCAACGTGCGCCCGTTTCGGCCCGGAGGGGCAGATGGGCATCGGCGCCT  
CGCTGATCTTCACGACCATCGGCGCCGACGCGCCACCGGTGAATTACGACCTGTTTCG  
ACGTGGAAGAGATCTCCGGCGGCATCCGGCGCTACACCTGGGGTTTCTGGACCGAC  
ACCATCCAGTCGGCCAACCTGGCCGGCGCGGAGATCCGCTTCGCCCAGGCGCCGGA  
GCAGGGCGCGCCGATGCCGGCGTGGGACGCCATGACGCCGGTCGGCGATAGCGGCT  
ACCACACCGGTGCGTTCGACTCACCCATCCCGTCGTCGGGCAAGTGGACGTTCCGCA  
TTCGTGCGCGCAACACAAACGGCACGCTGTGCGTGGCGGCCAAGTACATCACCAAG  
ACGCTGGGCAAGAACCTGGGCGAGCTGCAGGAAGAGATGCAGCAGGCGATCGATC

AGACCACCGAGGAGATCCGGCAGGGCTTCCTTGAAGCGGCCGCGCGACAGGCAG  
ATCGCTGAGGAAGCGTTGGCCGCAGCAAACAAGGCCCGCGAGGACGCGATCGCACA  
CGCTGACGCGCTCAACGCGGCGCTAGGCGATCTGGTCAACGCCGACGAATGGACCT  
CGACTGCTTCGTATCCCAAGGGCGACTTCGTGCGCTACGACGGACGTCTGTACCGGG  
CAGAGCTTGCGAACTCGGGCGTAGTGCCGGCGGGAAATCCCTCGACCTGGCAAAAC  
GTCGGCAACTATTCAAGCGCAGGCGAGGCGATCGCCGCTGCTCTGGACGTGCGCAA  
CCAGACTGCGAACGAACTCGCAGCCGAGGTTACTCGGCTCTCTGGGGTCATTGCGCG  
GTTGCCTTCCGGCGACGGACAGCTGGCCACCTCTGCGGGCCGTTGGCGATGAAGCGA  
CCGCACGTGCCAACGCGGACAGCGCCTTGGGACGGCGCGTCGGTACCGTGGAGGCC  
CGCATGCCCTCCGGGACCGGCGGTCTGGAGACTGCCGCAAGGGTCACTGCGGTGGA  
TGAGGCGGCGGTCTGGCG

>CONTIG\_3\_length\_37379\_cov\_25.158059

CGCCAGACCGCCGCCTCATCCACCGCAGTGACCCTTGCGGCAGTCTCCAGACCGCCG  
GTCCCGGAGGGCATGCGGGCCTCCACGGTACCGACGCGCCGTCCCAAGGCGCTGTC  
CGCGTTGGCACGTGAGGTCGCCTCATCGCCAACGGCCGCAGAGGTGGCCAGCTGTC  
CGTCGCCCGGAAGGTAGCCGCGCAATGACCCAGAGAGCCGAGTAACCTCGGCTGCG  
AGTTCGTTTCGAGTCTGGTTGGCGACGTCCAGAGCAGCGGCGATTGCCTCGCCTGCG  
CTTGAGTAGTTGCCTACGTTCTGCCAGGTCGAGGGATTGCCCGCCGGCACGACGCCG  
GAGTTCGCAAGCTCTGCCCCGTACAGCCGCCCGTCGTAGCGCACGAAGTCACCCTTG  
GGATACGAAGCAGTCGAGGTCCATTCTGTCGGCGTTGACCAGGTCGCCTAGCGCGGC  
GTTGAGCGCGTCAGCGTGTGCGATCGCGTCCTACGGGCCTTGTTTCGCTGCTGCCAA  
TGCTTCCTCAGCGATCTGCCTGTCGCGTGCTGCCGCTTCCAGGAAGCCCTGCCGGAT  
CTCCTCGGTGGTCTGGTCGATCGCCTGCCGCATCTCTTCCTGCAGCTCGCCCAGGTTC  
TTGCCAGCGTCTTGGTGATGTACTTCGCCGCGACCGACAACGTCCCGTTGGTGTTTC  
GAGCGCGGATAGCGAACGTCCACTTGCCCCGAGGCCGGGATGGGCGAGTCGAATGCA  
CCGGTGTGGTAGCCGCTGTGCGCCACCGGCGTCATGGCATCCCACGCCGGCATCGGC  
GCGTCCTGCTCCGGTGCCTGGGTGTAGCGGATCTCCGCGCCGGCCAGGTTGGCCGAC  
TGATGGTGTCCGTCCAGAAACCCAGGTGTAGCGACGGATGCCGCCGGCGATTTC  
CTCCACGTGCAACAGGTTGTAGTTCACTGGCGGCGCGTCGGCGCCGATGGTCGAGA  
AGATCAGGGAGGCACCGATGCCCATCTGCCCTTCCGGGCCGAACGGGCGCACGTTG  
ATCGTGTAGGTGCCGGCGCGCGGGATGCGCCACCGCGCCGTGCGGGTGCGCGTCTG  
CGCCACTTCTACCAGCTCGCCATTGCCGTCCGACGCCGAGGCGTACACCACCGCGTG  
ATCGAACGGCCCCTGATGTCGAAGGTGGCCACCAGATCGGTGGCAGTGACGTGCG  
CGGTGGTGATCTGATCCTCGTTGATTGCCAGGTTGCTGAGGATCGGCCGTGTGGCCA  
GCGACGAGCCGTTTTCCGGCCGGATGTACTGGCCGGTCTTGACGTAAATCCAAAAC  
CCGGCCCCCTCCGGCACACGTTGATGTTTCGCGCCCTTGAGATCGCTCTCCGGATCGA  
TCACCACTACGCGCGCGCGTAGGCCGGGCGTGGCCTTGAAGTCGTAGATCCAGATC  
GTGTCGTGGGCCGGGTTGTCCTGCCAGCCGCCCTGCACCATCGAATCCTCATAGCTC  
TCGCTTGGCAGCGGCGCATCGTCCGGCCATTCTCGACCAGCTGGATGGTGTGCGTC  
GCCTCCGTGAAGTTGCGCACACGGAACGTGCGATAGACCGCCTCGCCCGGGATGCG

CAAGCCAATGAAGGCGCTGCGTGCATCGGGCGGCGGTACAGGCTCGTCCAGCGTCA  
ACGTGACCGTGCCCAGCAGCGGGCTGCGCTCGGCCGAGACGATGCGCCCCGCCGAAA  
CCCCACTGCGTGAGGTCGTGCGAGATCGACAGCATCGACATGCGGCGGTAGGACAG  
GTACTGAAGATCCTGGGCGAAGCCGATGTCCTTGTACTGGAACAAGCTCTGCGCGA  
GGTGGTAGCGCGCCATCTCGGCGGCATGCACCTCGCGGCCGATGCCCTCACCGGTG  
AGCCGTGCAGGGCTGAGCATATCCTCGACCTTGACGCCAGGTGCGGGCACACGCAG  
CGTTTCGACCTTCTTGGTCGTGCTGTCGAAGTAGCTGTACTCAATGCCGTCGGCAGC  
GCTGGCCAGCGTG TAGTCCACGCTGAAGCTGCCCTTCTTCATCTCGGCCATGTTGAC  
CACGCCCCGAAAGCGGCTGCTCGTCGGCGGCCACACCACCGACAGGCGGCCACCGG  
CCCAAGTGGTCTGCCCCATGCCGGCCAGGGCGATCGCCTGCAGCACCTCGTCGTGAT  
TGCGCTCTTCGGTCAGCCAGTAGTCGTAGGTGTAGCCGTTTCGCCTCGCAGTGGCCCA  
TGAAGCCCTGCAGCGACTCGATGTCGATCTCCTCGTCGCTCTTGCCCATGCCGGCGA  
TGAGCTTGCCGTTCTGGTCGTAATAGCCGCGGACGTACTTGAGGATGTGCGCGCCCCG  
GGTTGCTCGATTCTCCGCCACCCAACTGCCATTACGCCACACCGGGATCGGCACGG  
CGATGTGTTTCGGCGCGCAGTTCATCGGGTTGACCGTTGATCTGGCCTGTGGCCTTCA  
GCAGGATGCCGGTGCGCGCCAGGCCGCCGTAGGTGCGCCGTGTCGGCCTGCACGCTG  
CCCATCGTCGACCATTGGAAGTCGTTGCGCTGAGTGTTTTCGCCCTCGTAGTTGCCCT  
GCCCCAGGATGCGCACGCGCACGTCGTA CTGGCCCTTGGCCACATCCGCCGACACC  
GTGGCGCGCTTGCTGACGTCCAGCTTGTCGCCCCGTGAACATCTGCGTGGCCAGCGTG  
GTCCAGATGCCGGTGCCCCGCCGGCGCGTACTGCACCTGCACGGTCTCCGACACGTTG  
TATTTCTTGCCGGACGTGCCCCACGCCGCCAGCACGTATTCCAGGTTGATCTGGATG  
CGCACGGTGTGCGGCGCTGGTGGTGCGCGTAACGAAGTCTGCAGTGTCCGGCAGTTCA  
CCACCGTCGGTG GTGTCCACGTTGCTGTATAACGGAATGGTCTCATCCGGCATCTGG  
CTGTAGCCGGAGTGGTAGACGCTCACGCCCTCGTAGTTGGACAGCGGCGTGCCGGC  
ATTGGTGAACACGCCCACGCGGCCGACGCCGATGCCCGGCGTGAGCACCATGCCGA  
CGTACTGGTTGTCGCCCTCGTAGAAGGTGTAGGGCTTGCTGGCGAAGTCGGGCGCAA  
TCAGCATGCGGCCGAACAACAGGCCACCCGGCTCATAGGGGCGCATGCGGTTGCGC  
GGCGCCCCAAGCTGTAGACGGTGCCCGCCGTGCTCGGCCCTGCAGGACTCTCTACC  
TTCGGCCCCGAGCGCTTTATTGATCAGGACCGAACCGGCAACAAAGGCTGCCGTGTAT  
GCAACCGCCGCACCGGTGGTGCCCAGCCCTGCCGCCACGTGCGCGCCAGCGCCGCC  
AGTGAAGTAGATCAGCGCGGCCATCGCCACGATGTACAGCGCGTTCCTGCCGACCG  
CTCCGCGCACCTCGATGACCTGGCCATCCTTCGGATAGACATAGGCCACAGGTGGC  
GCGGCACGACGCGACCAACCAATGTGTACGGTCCAGTCGCCCTGATCCAGGTGATC  
ACATGCCGTTCCAGGA ACTCGCAGAGGCGCTCTCCCGCCTTCAGGTCCATCGCAATG  
TGTCGCTGCCCTTCCAGCGTCACTGGGTGCGGCGTCAGCACCAGCTGGCCGTCGCTT  
GCAGGCGTAGTCATCAGACCCATGTGTAATAACCCCTCGATCCGTGCGCCGTAGTCCG  
GCAGCTCGCGCACCCGGTG CAGCCAGCTGCTACCGAGCGCGCTGGTTGTGTGAAGC  
ACCCAACACTCGTGGGCCAAGTAGAAAAAGACGCCGACGTGCCCGGGCCGGCTTTG  
GCCCTTGTCGAACATCAAAACCAGGTGCGCGTCGACCGGCGTGCTAGTTGGTGCGGC  
ATACGCGCGGGACA ACTCGCCGAGCGCCGCCTGACCTGCAGCACCACGCGGCCGTC

GCGCAGGCACATGCACCTCGCGGCCGAACAGCTCGCGCTGCACCTGCATCACCAGG  
TCGGCGCAGTCGTAGCTGTCGGCGTCGTACGGGATGTTGAGGAACCGCTCTACCTCG  
CTGGCCCCGCATCAGAAGATCCCCGGCAGCGTGAAAGGGTTAGCGCGCAGCTTTACG  
GCCTGCTGCCGCATGAAGAAGTCCACGCCGATCTGCGCGGTGATCAGCGGGCCAGC  
GGCGCGCACTTGCGTCAGCGGGAGGTAAAACCGCCGCGCAATGACGTCGGGCTGCG  
CACGGTCCGTGATCAGGACACGGCACATCACCATTTCGTTAGGCTGAAGGCGCTCCA  
GGTCATCGGTAATACCGCGGCCGACGTTGTCTACCTCTAGCTGCGCGCGCGGCGTCT  
GCCCCGGCCGCTCCGTGGGCGGCGTGAAGCGGAACGAATACCGGCGTAGGGTGTG  
CCGTTGCTCACCCAATCCTTCGTGTCGTTGGCAATGCGCAGCACCGCGCCGAATGAG  
GGAGCGGTCACTCTCCAGTAGCTCCAGCGGCCCATCCGGATCCGTCACGCGCTGCCGG  
CGTTCAAGGAAATTGCTCATCGGCGGTACTCCAGAACAGCCTGACGCGTGCCCTGG  
GTGAACGCGGCGTTGGCGGCCTGCAAGCGGCCAACGGCACCAACCCTTGAAGCGAGC  
GGAGATCTGCTGCCGCGTGCGTGGGTGCACCATGTCTGAAGTAGCCACGCGACCGA  
TTTCATCGAAGTAGAAGTCGTCTGAACGCCGCCATCGATTTCGGCCGTCAGGAACACC  
ATGGTGACCGGCAGCTCCACCATGACGCGCGTGTTAATGATTGCCTGCTTGGCTGGT  
CCGCGCTCCATCTCCGTGCGCTGCACAGAAGGGTCCGGTTCTTCGCCCAGGTCACTG  
GCAAGCAGACGGATATTGTTGGGAAAGTTAGCCACTAGGCGCTCTCCCAGGGAGAA  
CCATTGACGGTCATACTCCGTCCTCCGGCCAATGAAGATTTGAACAATGGAAAATCA  
AGATGTGGACCTCGACGTTATGGGTGCGCTGGCGTCGCTCAATGTCTTAGTGGCGTT  
CGCAATCGCCACGGCGACACGCGAGCACGACGATCCGCGCGGAGCTGCTTTTCGACG  
TGATTTTCAGCGGCAGAAGAGGAGTTGGCGGAGACAATCGCCAACGTCGACAAGTCG  
GCGCCGGCTCATGTCATCGCCAAGCTTGGTGATGCCGCCAGACGCAATACGATGTCTG  
GTTGGCGTACTGGTGGATGCCTTTCTGAAATCTATGGGCGCCTCGCCGCGCGAAAGC  
GAATAGGCACCTAGCGCCGCTCTCTGATGTCAAATCGGCTTTTTTTGAGCGGCCGCTG  
TCTTTCCGCCGTTTGCTGTGTCAATTGGCGACGATGTTGATGACGAACGTCTCCAGCTG  
CTTTCCGTCCGGCATCGTTGACCGCTGCTCGCGCGCTTGCACCTGAGCACCTCCGTA  
GTTATTGATTTTCGATCTTGGTTTCAGCGGTGCTCGCTGTGCCTGTGCCAGCGCCCATA  
GCAGCGGCAGGAATGACCTGCCCACGATTGCCCGGAATCAGGTAGCTGCGACCAACC  
CTGCTGAAACAGCTCCGGATCGCCGCCTTCGCCCCTTCGTAAAGCGAGCCCGGTGC  
GACTGGGCCGCCATTCGCGCGACTGCCTCCATAGCTGAAGCCACTGACTAGTGAATC  
ACCCAAGCTGCTCGTGATCGACTGCGTGCCGCCAGTAACTGCAGCAGATCCGGCTGC  
CCCAACTCCACCACCCATAAACGCACCGATCAGACCAACCGCCTGCTGCTTGAACGC  
ATAGCGCGCCAAGTCGGCGATCATCGAATCGATCAAGCTGCTGAAGGACAGCTTCC  
CGGTTTGCGCCAACCTCACGAACGCGTCTTCGCCGGCGCTAAGGCCATTACAAAGAA  
GCGAGCCAGCTTGCTCAGATGCATTTGCTGCGGCAAAGACGTAGTCGTCCCACACGC  
GCGTGAAGCCTGTTGCGCAATCGCCCAGCAAGTCCATCCGCTGCTGCTGGTAGCCCC  
GCTCGATGTCTAGCGAACGCGAGAGACTCCCCTCCAGCTCCGCCACTTGTGCGTTGT  
ACGCGCCCCGGGCTTAGTGCGGTGTTCTTGTCCAGCTGTGCCTTTTCGAGCTTCTCCCG  
CTCGCGCAAGTACTCTCGCTGAATCTCCAATTGACGCTGCAGCATTTGCGTGGCGTC  
GGCGCCGCGACCGATGCCCATGAGATCGACATTGGATTGCTCCTGTGCTGCTTCTC

AAGCTGTTTCAGCCGCTCGGTGAGAGCTGCCTGCGCTGCCAGCTCGCGCTGAGTGCG  
GAGCGATTCGTCGTTGATCTTTTCCTGCGTCACCAAGTGGGCAAGCTTCGCGTCGAC  
CAGATCCTTTTCGGCCCTTGTGGCCTTCTGATACGTATCCCCGGCCCGTGTCTTTTCG  
GCAAACCTTCTCTGCTGCAGTCAGCTTGTCCGTCGACAACGCCTGAGCATCTATCGCC  
GCCGTCTGCTGGTTGATCTGATTGATCAGCGTCGCGAACGACGTGTCCTTTCTCCCA  
ATACCTTCCCGCTGGTTGAACTGTTTGTGATCTGCGCGTTGGACTGCGCGATGAGC  
CTTTGCATTGAGCCATCGGATAGACGCGAATCGGGGTTCCCCTTCGCGTCGCGCGCA  
CCCTCCAGCTTGTTGTAAAGCTCGATGATCTTGTTACGCGCAGCCAGCTTTGCCGACT  
CACGGTCAAGCCCGGCAAGCCGCGTGGTAAGTGCTTCCGATGCTGCCTTAGCCGCTA  
CATCCTGCTCCTGGTAGACCTTCGCCAGATCTTCAATCGCTTTGCCACCATTTACCTC  
CACCTCGAAAACCGGCGTGGGCATGCGGCCGCCGCCGATCAGAGAGTTCAAACGCT  
GCATCTGAGCCTTTGGCGACGCGAGCGTAGCGATCATGTCGAACTGCAGGCCGGAT  
GCAGGGAGGAGGTTCTTCAGTTTGCCGCCAGCTTCTCCAGCTCAGTGCTGAAGGTC  
ATTACCTCGCCCCAGGCACCACCGACCTCGTCCTTCACATCTCGCCACCACTTCACC  
AAGCTAGGCATTGCTGCCTCGGCTTGATTGGCCACGTTGATCGAGCGCTCGTAGTAG  
ATCTGCAGCGCTTCAGCAACAGCCTGCTGCTCGTTGCCCTCCTCCTGCAGCGTGCGG  
ATGCGCTCCAGCTGCGCGGCGTTGAGGAAGCCCTCTTGATTGTTGAGTGCCACCAGT  
GCATTCACAGGATCACGCGCGATGCGCTGGAACGCCTCCACGGTCTTGCTGCTGGCC  
TGACCGGTGGATGCCTCCATGCGCGCGGCCGCCCTCGGCGACCATCAGGAACTGCTTG  
CCGGCGAACTGGCCGGAAGCTGCCACCGAATTGAGCGCATCGACGGCGCCTCCGCG  
TGACACGCCCCGCGAGCTTGTCGATCTCGCCAACCAAACCCCGGAACTGCGCGCCACT  
GATGTCGGCATTGCGGCCGGTGAGGATTAGGTTCTTCTGGAAGTCGAACAGCTCGTC  
CTGGCTCTGTTTCAGGGCCACCGCCAACGCGAGTGACGCGGCGGCAGACACGGTCA  
ACGGGTTGACCATGCCCAGCACGTAGGACGACACGGCCTTTGCTGCAGGGCCGATG  
CCGCCGAGCTGGTCCTTCAGCTGACCACCCTGCTGGATCGCCACCATCCATATCGGC  
TGGCCGCGGACACGCTGGTGACGATGTCCGTCATCTGGGCTGGAATCATGCGCATC  
GCCGCGGCCGTCTGGCGCGCGGTTCATGCCGTATTGCTCGGTGGTGTCTTGGACTTC  
AGCAGCGCCTGCCGGCTTGCTCGATCTGCGCCTGGTATTGCTGCATCACCTGCGGC  
TTGATCAGCCCCAGATCGCCGGCACGCTCCAGCCGCTCCTCCATCTCGGCCAGCCGG  
TTCAAGCCGGCAACGGTGGGATCGATCTGCGCGAGCAGGCGCTTCAGGTTGATCTCC  
TGCGCCTGCGCCGCTGCCGCTGCCTCGCGCGCCTGATTGGCGGTGCGTGCGTCGGCT  
TCCTGCAATGCACGTGCACGCGCAACCATGCGTTCTTGCTCGGTGCCGGCGCGCGAC  
ATGGCTGCGGCCTGCACGTGCATCCCCGCCGCCGCGTCGCGCGCAGCTTCCGCCAGT  
GCACGATCCGACAGGTTTCGACGTGCGGCCTGCTTCGGCGTAGGTCATCGCCTGCTGC  
GCGACGCTGCGGTAGCGAGCCTCCTGCTGCGCCAGCTGCTGCTCCAGCTTCTCCGAC  
GCCGCAGCAGACGCGCTTGATCGGCAGCAGCACTCTTGCCCCGCCGCGCTGTAGGC  
CTTCAATCCGGATGTTGCGCCGGAGAGCCGGCCTTCCATGGCCGCCAGCGCCGAGA  
CGATTTCCGCCTGCGCGCGGTTTCATCGCCTGCAGCTCGGTGATGACCGTGCCGGTAC  
CGACACCGATGCGTTCAAGCGCGCCGCCAGGCGGTGCCCCAGCGCAACGGCTGAG  
CGGTGATCGAGCGGGACATCGACTGGAAGTAACGCTCCAGCCGATCGGCAGAGCC

ACTGGCCTTGTCGGCAGCGGCGGCGTTCTGGTCGAGCGCATTGGTGCCTGCCACCAG  
CCCGGTCGAATCGACCTTGTAGCCAAGCTCGGCGATATCCATCAATCAGCTCCAGGT  
ATTGCCAGGTTCTGGGCGGTCTGCTCGCGCGCCGCTGCTTGTTCTTCGCGCACGGCACG  
CAGATAGGCGTCTGCCATCGCGATGAGCATCTCCATCTCTTCGGGGAGCACATCGCG  
CCGCAGCAGGCGCTGCCATGCATCCAGTTCGGTGTAAGACAGCGCCTCAGGGCCGG  
ATCTACGCCGGCCAGAGATCAACCAGAACCAGTCCCACACGTGCACCGCTTCTTCCG  
GCAGATCGACTTCAGGCGCCGGTTCTTCGAAGCGGGCATTGCGCTGCCGCCGCGTCT  
CGCCATTGGCGTCCGGCATGTCGTACCGGACGGTGAGATAGGTGGCGTCAGAGATC  
CTCGCCTTCAGCGCTGCGAAAAAACTCCGCGCGGTTGCCAGCTCCACCTCCAGCTG  
ATCGCTGATCCATGGGAGCTCCTTCAACACCTTGCGCAGCGATTGCTCGGTCAGATC  
CGGCTTGCTGCCGTGGAAGGTGAGGTCCCCTTTCCACTCCCAGCCGCCACAGAAGC  
CACGAGCATGTCGGTGCGGCCCTGCTCCATCTTCGATGCGGTCAGTTACCTTGCC  
CATCAGGCGGTTCATCCAGCGCCTTGCGGCTGGCCTCGCGCACCTTCGGGTGGGTATC  
GGGCAGCAGGGTGATGCGCAAGCCACAGGAGCCTCGGTGGCGGGGATGCTTGATAT  
CGATGACGCGCTCGGCGGCAACGATGGTGGTCAATTCGGTCATGGGTGATCCTTTGC  
GATCGATCCGGAGAGGAAGCGAGGGAAGCCGGCTGGATCAGATCCGGCTTATCAGG  
CGGCCGCCCTATCCCCCGCTGTTTCGGTTACGGGGTGACGGGTGCCGGCACTTCGATC  
GGCACCTGGTTCAGGGCGAGCGAATAGACGTGCAGCACGAAGTCCTCGTTGCGGCC  
ACCGGGCGTGCGGGGACCGGTGACCAGGCCGCGCAAGTACTCGATCTCGCCGGACG  
GACGCTCAACCTTGAAGGCGTACGCGTCGGCCACCGTCGGCTGGCCAGCAGCACGC  
ATGGCGACCTGACCCGGATCGTCCAGCACGCGTGCCACTTCCACCTCGGGGTGCGCC  
GCATTCGAGATGCCCTTGCCCTTCAGTGCGACGGCGGTGTCCACGTGTCTAGGTG  
ACGATGTTGGTGGTCAGACCGCGCTCGCCGACGCTGCCGACCTTCTTGACCTGGACG  
AACGTCAACGCCGCGAACTGGGTCTGGGTGAGATCCTCGTTCTTCGGCGTGCGCGAG  
ATGAAGAGCTTGGAACCGCTATTGGTTTGTGCCTCAGCCATTGCTGATATCTCCTCG  
CTTTGGGCATAAAAAAACC CGCCACGGGGCGGGGTTGGGGAACGAAAAAGGCCCG  
CTCAATGGCGGGCCTCTCTCGATGAATATGGTGCTGATGATGTGGATTCTGAACCACC  
GCTCCGCGCGACAAGAGCTGGCCCAATCCCATGGCCTGACCCATGGGCATGCATGT  
GGGCGCGTCTCCACAACCCCCGGCTGCACCGATCCAGGCCGGGACAATCCATCAG  
CAAATTAAGCGTAGCTCAGCTGTCGAAGCCGCGCCACATGATGGTCACCGGATGCA  
TGTGCCGCTCCGGGTCTTGAATGATGGTTGAGGTCCAGGGCATGCGGTACACGCGCA  
TGCCGGCGAAGGTCGTGCCCTTGCCGAATGCCGCGATGATCTGGTCTGTAAGCTGCG  
TTCCGACCATGATGCCGGCGCCCGGCCGATAGCACGCTGACAGCTGACCGAAGCCC  
TGCAGCAGCGACGGCCCGTCGTCCTCCATGCCGTAATTCTGCGTCTGGTTGGGGAAC  
CACTGCAGCTCAAGCCATGAACCGCTGGTCGGCGGGGTGAAGCCGATGCCCGGATA  
GGAGCACGGCAGGCCGATACTACGGCGAAGGCGCCAACCAGGCCGGCGAAGGCG  
TCATAGATCGCGGTATCGCTCATGGAATGCGTGCTTACCTTTGCGGTGACCTCGTT  
GACGATGAAGTCCCAGTTCTGCGCCGTAGCTCGCATGAAGCCCTTGCCGGCCTGCTC  
GTACTGCCGGCCCAGGCTGTCCTTGCCACTAAATCCATGCTCCATGCGCATCGCATA  
GGCGGCGGTCCAGCCAGCCCATAACCGACTCGCCAGCTGCAGCGCTGCGAAGACCA

GCGCGGGGTCGCCGCTTTCCGAAGACGCTGGGGCCATCTTTGGATGCCGCGACGGAA  
TTGCGCAGGAACCCGGTATCAACCGGCATCTTCCCGCCCCGCCCCCTCCGGCGTGTTG  
GCCTGATCCATCACCGCCTGCGCCGAATCGCGGAAGATCGCCTCCTGGCGCAGCTTT  
GCCTTCTCGGCGAATGCCCTGACTTGATCACCGAACTTGCTTGCCACGTAGCACCTC  
CGCCGTCATGTCGATCCGGTACTGCTTCGTGCAGCGGCAGCCGACTATCTCCTCAGG  
GCCTGCGCCCCAGGCTCGTGTCGCCCCGGATGGTTCAGCAGCGCGCCGCTGGGCGACT  
GGAATGGCTCACCGAATGCGCGTTTTCTGCCCCGTTTCATGGCCTTGTGTGTGTGCCGGG  
TTCGCCTATCACCGGTGTCCGACCACGTGCCGGTTACGTTCTCCGGGGCCAGAGCTC  
CCGATGCGATCTGCTGCCGATACGCCTCTTCTCGCCCCGGCGTTTCATGCTGGTAATCG  
ACTCGGTACGCGCGATCATCTCTCCCCGCAGCTGCAGCAGCCTGTCCGAGTAGCGGC  
CGGCGATCTTGTCGATGTCCGCCTGCGATAACCGGCTTGCCGACGGCGATTGCGCGCT  
TGACGATGCCGTCCAGGCGCTTGTCGCGTCGCTTCCGACCGAAGTACTTCGCCATTT  
CCCTTGGGTCACCGCTGGCCAGCTCGCCGCGCATGCTCTGCACGAACTGGCCCTGCT  
GCGCTGTACAGCCCCAGCACGCCACCGGTGCGCCGGCCTGTGTACACCGACCCGCCCA  
CGATGTCCAGCGCGCTCTGTCTGCGTGGATTGCGGGCCGGCGACCATGCCGCTCTCCAGCA  
CGTTGCGGATCAGCGTGCGCTGGTCGTTGACGATGCCGGTGATCAGGTTGCTGGATT  
TGTCGCGCAGCCATGCTTCGGCGGTTGCGTTGCGCAGGTCGAAGGTCGGCCGCAATG  
CAGGCGACCGCACGTCTGCCGTGGCTTGTAAGTTGCCGGTGATGATCGGATCCAGGC  
TGAGCCGCATCTTCGGCATCTCCGAGACGCCCTGCTGCCCGCCTGCCGCGTAGGCGT  
TGCGCAGGGCTTCACCCAGATCGGCAAAGCGCGGGCTCGTCTAGCCCCATGACGGTG  
AGCACATCGTCGATGCGCCCAGCCTGCAGCAGGTCTGCGATGAGCTGCACGCCTGC  
CTGATTCTGTACCTCGGATATCGCCCTGAGAAAAGCGCGCGCGATGGCCGGGCTCCA  
GCTTCGCCGCCAGCTGTTTCGAGTTGGCGGGAAGTCGTTGCGGCCATCAGCGTCTCGC  
ATGGAATTCGTACATGAGGATCTGCCCCGCCGGTGACAGCGGCTGCAGGTCAATGA  
AGCGATACAGCACGCCGCTGAGCAGGATCCGGTCGTCCTTCGTGCGGCTCAATGGCG  
ACATCGGTGGAGATCAGCCCCAGCTTGTCCCCCCTGCAGTACCAGCGTGCGGCTCGCGG  
TTGGTCAGGCTGTACTCGGTTTCCACCACCTTGACAGTCGTGCCGCGTCGGCGGCCCC  
TGCTGCGGGTTGTGCGGGCGGCCCGGTGACGGCGCCATCGCGCTCCAGCTGCGTGAG  
GTAGCCATAAGTGCCGATCAGCCTACGAGCGGTGCTTCCAGTCGGGCGTAGATCG  
CGGCAGCCATCAGACCACCATCACTGCTGGGAACATCGCCGGACGACGCAACAGCG  
GCGCCAGGATCTCGTCGATGCCCGGAATGATTGGACGATTAGGCGTGCTGCCCCGA  
ATGGTGCTCGCGCCGTATGAGACCTCGATCGGTCCGACCTTCTCGCGCGTGACCTGC  
GCGCTTGCGACGTAGTCCGGCGACAGGCTGCCGGGCTCCATCAACTCGCGCAGCGC  
TGCTTCGTACGCCGCGTGCTCAACCTCGATCGGCACCACATCGGGAGCGATCGGGTT  
GCCGTCGTAATCGAATGCGCCGGTGCGTGGCCACTCGTTCGGCTGGCCACGCCCGTC  
TGACGCACGCCGGGAAACATCGACTGCCACCGGCCCGAAAGCAGGAGCACCCGGT  
ACCGGCCGTCGATGTAGTCGGTACCGCGCACCAAGCGACGCCTTGCGGGGCATCCTCGC  
TGCCTGCTGCCCATGCCGTGTTGCCACGGATTCGGTGATAGTCGTCTGCTCCTTCCAG  
CGTGCCGTACATGGTCAGCTCCCGGTCTTCGACTTCTCGGCTTCGTCCAGCGCGGCC  
TGCAGCTTGTTCCACGCCCCAGCGCTTGTCGTGCTTGATGCCGCCGGCTTCCAACCTG

GCGATCAGATCGACCTTCTTCTGGTCGTCGGCGACCTTCGCATCGATCACCGCCTGG  
GCAGCTGCAGCAGCTTCGGCCTTCAGCGCGTCGAGCGATGCGCTGATGCGTGCCTCG  
CGGTCCACCTCGTCCAACGAGTTCCAGTCTTTCAGCGACAGGGCCGAGGCCTTGAAC  
GCGTGCTGCACGACGTCGTCGCGCGTGACGCTATCGCCGCCTTCGATCAGCAGGATG  
CTGTCGGGAAGGTTGAACGTGCCGAGCAGGAACGGCTCGGTGTCGTCCTCCGACTC  
GCTGAGGATGTTGGCGGCGAGCCACGCCTGCACGACGGCGTTCTTCTTGATGGCCGG  
CCAGTTGGGCACGGTGGCCGGCGAGCCGGGGATGATCTCGGTGCCATCCGGCAACG  
CCAGCGGCGTCTTGTGGTTGTTGCTGATCTTCATTGCATGCTCCCGAAATGAAAGAC  
CCCGGTTGCCCGGGTCTGTGGTTAAACGAAACCGTCGTAAGTGCTTCTTCTCGGCAA  
GTTGCCTCGCCGCTATCGCCTCTTCCCTTGTGTCGAAAGTGCCGAGTCCGATTACCCG  
ACCCGCCACTCCGATCCTTGCGGACCATCGATCACTATTCGTGCACGGGTGAACGCC  
TCGGTGCCCGCTTTTGTGCTGGGCCGCATCACTCGCGAATTGAGATTGTTTTGGGAGCG  
TGTGGCCAATCGTAGGTTGACCCATCGATTGTCAGACCTATCCGTATTTTCGGTGGTC  
GATATCGGACGCTGGCGGCCAATCTCCGGTCATAAGCAGCCAAACAATGTGATGTG  
CTCGATAGACGCGACCGAACAGCTTGATCTGCACATATCCATCTTTGCTCGTGCCAG  
CAATGTCAACAGGCATTCGACCTCCGCCCTGGCACATCACTCTCACCTTCCAACGGA  
ACAACCCCGTGATTGGATCGTAAGAAAGGCGATCTCGAATATCTGCTGCAGTGAAC  
GCACGACGAGCGCGAGGAATTTCTCTCTCGGCAAACCTCCGGCCTGCCCATGCCAACC  
CTCCGAAAGTTTGTGCTGTGGAAGAAGGCCCGGGTGTGCTAACACTCGGGGCCTTC  
GCCGTTATAACACCCGCAACGCGCGCCCCCTACTTACAGCCCGTCGACGTAGACGACC  
TGCTTGGGGAGGCGCACGTCCAGGCCGCCAGGCGCATCACGCCCGGCACGTCCCA  
GCGCAGCGGGCCGCTCTGGTACACCGGCAGGAAGCGGTGCGGCATCGGCATGTGCA  
GCTTCAGCACGTTGGCGTCGTAGCGGTACGCGACCATGCGCGCCACGTTGCCGACAC  
CGGCGTTATCCAGGCCGCGCAGGCCACGCACGTCCAGCGGCTGGCGAGTGGTGGCC  
GTGTAGACGTTGTTGGCCAGGAAGTACTGCAGCACGGTGAGGTCGCTGTACTCGCTC  
ATCTTCTTGGTCGAGATGAGCATGTACTTCGACCACGGCAGCAGCAGACGGTCAGCG  
ATGGCGGTGGTGTGTTGGTGCCATTGAAGACGTTGATCAGCGCCGCGTTTCATGTGCCG  
ACGATCTGGTCGGACGTGGCGGTACCGGGCGCCTGCAGGGTGCCCCACGCCCCGGT  
GGGGGCTGCAACTGGGGTCACGCCGGCGGCGTTGAACAGGCCGCTGAAACCCTTGC  
TGGCGTCGCCAAGCAGCGCAACGCGGTGACCATTTCTCGGATGCGCGGCGCGCG  
GCCGCTGCGTCCTCGTTGGGCAGGTTGATGCCGAGCAGCTGTGCGCGCCCGACCTCT  
TCCCAGCCGTAGCCGTAGCCGATACCAGCGGTATGCACGCCGGTCTGGAACCTGCGA  
GCGGTTGGTGCCGGCCTTCGGGATGTCGTCGGCGTTGCCGTTGATCCAGTCGGCCTT  
ACCGTACTGGTCCTGCGAGTAGTAGGTGACCGACGTGGCGAACTCGCTGCCGGACG  
TGTCGACCGGGATCAGATCGCGGTACTGGATGTCCGGATAGACGGTCCGGTAGACG  
CCGGGCTCGATGATCGTGGTCTGCGAGACCACGAAGCCCATGACTACCTGGGCGTC  
GAAGAGTGGATGTGCACGCATGTGGCTGGGCTCCTTAGCCGAGACGGACGACGGCC  
AACTGGGCTGCCGCGGTGGTGTGCTGGTGTCCAGCGGGCGCCGGTGATGGCGGTGTT  
GTTGGTGGCGACGTTGGTGAACGCGCCGGCTGCGGTCAGGTACACCGGATCGCCAG  
CGGCGACGGCGACCGAAGCGGTACCCAGATGTCGCCCTTGGTGATGACGCGCGCC

GATGCGCGCTGCGGGAACAGATCCAGTCCCGTGGCCGAGCGATCCAGCAGCGTGAT  
GCCGACGAACCTTCAGGTTGGCGCCGCCGAACGTGACGATGCCCTTGTCCGCAGCAC  
CCTGTGCCACAGCCAGGCCGAACGCGAGGCCTGCGACGTCCTCGACGTTGCGGGAG  
ATGACGGTGGACGGGAGCATCGTGGCCTGCATGCCGCGCACGGCCGCAGGCTGGAT  
GTCCGGGTAGTTGGTTTGCAGTGCCATGACTTAGGCCCCCTGGTTCTTGGTGCGGTA  
ATCGAGGCCGGTGACGGACGCGGCGTAGCCGTTGTCCTGCACGACGGTGCGGTGTG  
CGGCGCCATCGCTCAATGCGCGCGCGACCGGATCGAACGCCTTGACGCCATCGGCG  
AGGATGTCGAAGCGCGCCTCGATGTAGGCGTCGCCCTTGCCGGCGATGGCGGCGTC  
GCCGAGCTTGCCGATGACGGCAGCCTTGCGAACGTCCGCATCGCTCTTGCCGCGATA  
GTCGGCGTCGTGGATCGCCTTGGCCGTGGCCAGCAGGTCGCCACGCGCCTGCACGC  
GCGCATCCAGGGCAGCGGCATCCAACACCTTGCCCTTCAGGTCGTGATGGCGGCGT  
CGCGCTTGGCGATCTCGGCATCCTTCAGCGCCAGGGCTGCGGTGTGCTCGGTGCCT  
GGCGCGCGGCAACTGCGTTGGAGTCGGAGAGCTGGCGCTGCAGCTTGTGATGGCC  
TGGGCGCCGGCGTCGGTGGTCTCGACGGACAGCCATCGACCAGGACGGTCCGGGT  
CTTGATGTCAGGCATGGTGATTTTCTCAGTGGGTTGTCGTCGCCGATACGAAGGTG  
TTCACCACCGCGCGCCCGGTGCACTAGCGCGAGATGGTTGTTGCGGATGTTTCGTTG  
CACGGCGTCGTACGGCTCGCCTTCGGGCGTCACGCCATCCTCGAAGACGATCTCTGC  
GGTGATAGCCCTGCGACAGCTCGACCTTGCCGGCCTCCCAGTCGGCGATAGCCGCCTT  
GTCCATGAGCACCAGCGGCACGCGCACGAACCTTGTCGTCGTGCCGCACCTCGTCGCC  
GGTCTGGCCGACTGCGTACTCTTTCCAGTTGCTGGCATCGACCATCACCGGTGGGTG  
GTCGTTGGTCATGGGCCGGTGCGCGAAGCTGCGCAGCGTGGCGTCGGAAAAGACCT  
CTTCGGGGCGGCCGGTAGAGGCGCACGATGGGCATGTCCGGCTTGCCACCTCCGAC  
CCCAGATAGTTCTGGATGCCGGTGCGTGCCACCTTTGCATCGGCCACGAGGTAGCCG  
TCTGCGGTGCGGCGTGCGGCCGACACCGAGACTCGATCTGTCAGAAACATGGTTCA  
GTCCTCGCGGAGCTCTTCGAAGATTTCCGGGGCCCAGCACGATGCGGCCCCCGGTATGG  
CTCAACCTTCGATAGGTGATGGGCGCCTTGGTCAGGCTGATGTGCGGGGTGTAGTC  
CGGGAAGTCATGCGAGGCGCCTGCGCGGACGATCTCCTCATGCCGCCAAGCGAGCT  
GCGTGGACGCGAACAGGATCACCGCAGACATACCGCCCAACGGCTCGATGGCACGC  
GGGCCACCGCGAGGGATGACCAGCTCACCTTGTGTCGTCGCTGCTCCACTCACTTGCG  
TTACCCGCCTTGATCCAGTCGAAGCGCTGGCGCGAGTAGGCCACCGTCACGTGCAG  
GTCGTCGGCGATGTCTGTGATGCCCTGCTCCCGCGCCCAGGCTTCGATCTCTGCTGC  
GTTGAGCACGTCCCGGCGCACGTACAGCGAGCGAGGCTCGGCGTCGGTCAGCGGAT  
TGCCCTGGTTGCCCTGCGTGCTGCCAGTGCGGCCGCTGCACGCTCGTCCTCGTCCT  
GATCCTCCTGCCAGTCCGGGTTGCGCCTTGGTGAAGTCGTCCATCGCCGATTCCAGGC  
CAGGCGCTACGCCCCTCGGTCAGCATGTTGACCGCCACCTCGGCCAGCACCTCGT  
CGGGAATGAGCTTGGTGTCGGCGAGGGTCTTGATCGTGTGCGCCGTGGTCTTGCCGT  
TGGTGGCGCGCTCGGTGTCGCTGGTCTGCCACAGGCTGCGCCAGCTGTAGAACACGT  
CCTTCGGTCGGCTGCCGAGCGCCGAGTAGATCAGGCACTCATCCAGCACCGACATG  
GCCGGCGTGTAGATGAGTTCCTGGCCTGACTTGATGCGGTGCTAGTAGTTCCGGATG  
TCGTTGTCGCCGGTGCTGTTCAAACCGCCGGGCGACTGGCCCAGAAGACGCGTCAG

CGGGATATCCGCCGCGCCTGACACCTGCTGTAGGAAGGCCAGCATCACGTCGACCA  
ATCCGCTAAAGGACGCCGACTTCTGCGTGTACGTCTCCTCCCCATCCAGCACCAGCA  
TGCCGTTGATGCCCTTGGCCATCGCCGCGAGCTGCAGGCGCTGGAGCAGCTGCGCCT  
CATACGCAGGATCTGCCAGCTGCGACATGAGGTTTCGGGATGTTTCAGCACATCGACCT  
TGGCCTCGAATAACCAGGCTGGCGATGTTGGCGCTCGTGCTGTCTGCCTGTTTCACCG  
CGTCACTGATCGCCATCAGCACCGAGTCGCCCCAGCCGTCACCGTGGTCGATATCCG  
GGTCCGGCCGATGGGCGCCGTGCAGGATGACCAGCCGCGAGGGGTGAATTTGACCG  
TGACCGGCTCGGGCTGATGTCAGCGTGTAGAACGCGGGCTGGCCGTAGGTGGGCGA  
CTCGGCATCGCGATCCTGCTCGCCTGCAGTCAGCATGCGCTTGGTCAGCACGTTGAG  
GTGCTTGATGCCCTCCTTCCTGACGCGCGTCGGATCCAGCGGCTTCGTGGGGTCCGT  
ATCACCGGTACCGATGTAGATCGCAGCGCCACCGAACAGCCGCGCCTTGGTGTGCG  
CCTCCAGCAGCTTCACCTGCAGGCCAAGGCGCTTCTCCTCCGCCTCAAGGGCGCTGA  
TCTGAGTCTGATCGGCGTTCCATGTCCGCCAGTTGCGGCAGCCGTCGAGCGCGGGGA  
TGTCGATGATCTTGCGAGCGAGCCACGTGCCGCGATAGGCGTTGCTGGCATCAATGT  
CGCTCAGCGGCGCGAGCGCGTAGTGCGTGTGCAGCGCCTTGTCGCGCGAGGTGCCC  
AGGTTGGCCACGAGATTGACCAGCCCGTCTTTTCAGTTGTGCGAGCTTGCCCATCAGA  
GTGCGTTTCCAAGGTTGTAGGTGCTGCCTGTGACCAGCTCAGCGAATGCGCCAGAGA  
GCGCGTCGACCTGGTCGTCGTGTTTGGCGTTGGGGAACTCGGCGATCTCGTCGAGGA  
AGGCGGCCACCCACGGGCCATTACCAGCTTGATGTTCCCGGCCCTCGGCCTGCGCCT  
CCACCGGTGTTGCGCGGACCTCCTTCGATCCGGACTCGATCGCGGCCTTGATGTCCC  
AGCCGGCGAGCAACTTGATCTGGTGCGCGGCGTTGGACTTGCCGGCGGCGCCAGGA  
TCCTGCGGGATGCGTACCTTGATCGTCTGCGCGTCTGCGCGCGGTTGTTTCGTCAGC  
ATCCGCTCCACGCCGCGGGCGACACCTGGTCGCGCACACGTCGAGCACGTAGTA  
GATGCCGCCCCGTCTCGCCCAGCAGCAGGCCGACCGTGTAAGTCGGGATCGCTGCTGGT  
CTTCTCCTTCGGATCGGTGGCGGCAAAGTCCCAGCGCCGAACCTTGCGCGCGGTCGA  
GATGGCCGGTGCCGCTTCCACGACCTCGAACCAATCTCGCTTGAACGAGCCACCGTC  
GCGCGGTGTTGGCCGCTGCTGGTACTGGCCGGCATAACGCGTAGGTGCCTTTGGCGCG  
CTTCAGCCGTTTCGATCTCGGCGCGGGGGAAGCGCTCCGGAAAAAGCAGCTCGCCCT  
CCTGGGTGCGCGGATCCTCGAAGAACAGCTTGCCGTCGACGTAGGTGCGGCACGGA  
CCGCCGGTCTTCTTGCCGTCCTTGTCGTCGCTCCTCCTCGAACTCCATCGGGAGAT  
TGAGGTGGACGAAGCCCAGGTCCAACCTCCATCGCCACCGCTGCAATGTCCTGCTGGT  
GCAGGCGCTGCATGATGATGACCATGGCCGACGACGTGATGTCGTTGAGGCGGTGCG  
GTGATGCCCTCGCGAAAGATGCGGACGGCGGTTTTGCGCTCGGCGTCGCTCTCGGCT  
GTTTCGGTTGAGTGCGGATCGTCGACCTTGACCCGGTCGCGCGTCCGCCCCGTCATT  
GAGCTGAAGGGTCGGGCCTCACTGAAGCCGTTGCCGGTGTTCTCGAACTTGCCCTTG  
GCGTTCTGGTTCGCGCGCAGCTTCAGCGGCCACGCCGCTGATACTGGTCGCTCTCG  
ATGAGGCGCCGCGAGCTTCAGGTTGTCGCGCAGGACGTTTCGGCTGGCTGTAGGAGGT  
GGCCAGCGTCTGCAGGTTCGGCGCGGCCGCGCATGGCCCCCACTCCCAGGCAGTCCAGA  
ACACCAGCACCAGCGACTTCATCATGCCGGGCGGCACGGTAATCAGCAGGAACTGG  
ATGCGCCCCCTCTGTGACCGCCTCCAGGTGCAGGCACATCGCCCCGAGTGCCCAGCCG

ATCTTGAGCGGCCGGGTCGGTTCAAGCACGTGCCAGTGCTCGCGAATGAATCCTTCC  
AGCGACTGCGAGCGCGCACGGATGCCTTCGACATCCTCAGCGATGCGCAGGCGCTC  
GCGCTCAGCCTCCCGCCTCGACCTCTCCGCTCGGATCTCCGCCAGCGACGGCAAGCG  
GACCGAGGATCGATTCAAGGCGATCGAGCTCATCGTCTGACAGTTTGCTCAGGTCGT  
AGGTGCCAATGGCACCGGAGTGGCGGTGGCGCTCGACGGCGAGGCCGTACAGCTTT  
GCCTTGCCCATGGTGGCGGCGACCATCGCGGACGCCTGCTTCTCTCCCTGGGCAATG  
CCCCGGGCTTCCTCCAGCTCTGCAGCCAGGGAATGCACGGTCACGGCTGCCTGCTGG  
GCGACCTTGGCCTGCGCCTTCTGGATGGCGGCGGCGATGTCGGGTTTGGTCAGGTTC  
TCCGACCCGACACTCCTGGCGGTCTTCTCGCTGTACCCGGCGCGGATGGCCGCCTGG  
GTTGCGTTCTGGTCCTTCAGGTA CTGACCACGAACCGTTGCTGCTTCTGGGTCAGCC  
CGGGCGCTGCACGCGCCGTGGGCTTGGGTTTCTTCTTAGGCATGGGTTTGGCTCCCC  
GGGTGGGGCCGAGGTGTGTGTCGGAATTGCGGGAGTGGATGCAGCTCCTTGTCCG  
CAGCAGGCTGCAAGGGGGGTAGCGGGTTTAGGAACGGCCTGAATCCACGTTACAGCC  
TCGACCTGATTCTTCGGAAACAAGAGGTTGACCCCTCTTTTTTCCCTCTCAGACTCC  
ACGACAACAATCCAAAGCAGGTAATCGCCACACATGGAATACGATCAGATCATCGT  
CAATATCATTGGCCGCTTGGTTGTAGAGGGCACCAAGATGCTTCTGCATATGGGATG  
CAAGCACTGGCTTAATCGCGGTCAGAGGCAATCACGGTTTGGCAGGCGCGGAGCTG  
GTCGTCGGCGTCACGGCCGACTCGAACAACAGCACCCGCAAACCTCGTCTCGGCGCT  
CGGCGGCCGCATCACGTTGCGCGGCGCCGGCGGAAGCCTCGGTGAGGCGCTGGGTT  
TCACAGCTGGCCCCACCCGTCCCGCAGCTTGAGAGCACCACTGCGCAGGTCAGCCAC  
AACAGCATCAGGGACGGCTTGGGCCGCCTGCCGGTCTTCTTCATGCTTGGCTCCAAT  
GTCGGCCAGTGCCCTCGGCCTGTTGGTGTTCGGTGGATCGGGCGGCCTGCTCAAAGGC  
CAGGGCGCCAAGGGCGGCCCTGCCTTCTGCTCGCTGGTGGCACCCCTCGGCGCGGTC  
TCCGCGCCAGGCCCAGCCAGCACCGAACATGAGGCCAGACCAGATAATCAAGGCAA  
CGATGGTGCCGTTTCATGCGGTCACCATGTGCAGCCAGGGCTTCAGCAATCCCCATAG  
CCAGGGCACCAGCCAAAACAACAGCGCGAAGATCGCCGCGCCGGCCAGCGCGGCC  
ATGACCAGCAGCGCCGTGAATGCGCCATCCAATCCACTTCCATACATGGTCAGATCC  
TCGTGTTGGTGTAGGTGATCCAGATCCAGGCCAGCGCGGCCAGCAGCAGCCCGCAC  
AGGGCGGTGATCAGCCAGCCGGGTGGCTCGCGTGGAGGCGGCAGGCCTCGGTCCCA  
GTGATCGGCCATGTCAGGAGCCCGCCTCGCGCTGCGACCGGTAGTAGTAGCCGCCG  
ATGGCGCCCATCAATGGCCCCAGGTTTCCCAAGAGCAGCATGAGCACGTCCTTGTTG  
CCCGCTGGGATCTCCGAGTTGACGAGCACGGCGATGGCCAAGCCATAGAGCAGGAA  
CACGATCAGGGCGATGCCGAGTCGAGCCGTGCCCATGTTTCGGGTGATGAAGGTCA  
TGGCGCACCCGCCGATGCTCCCATCACCAGCTTCATGACCAGCCGACTCACC GCGCG  
CTTGTCGCGATCGGTGGACAGGCTGAAGTAGTCCCATCGGAACTCCTGGATGATCGA  
GCCGAATTCCACCCAGTCGCCCTTGCGGGCAGCTGCCCATAGCTCGCTGCTACCGCG  
TACTGCCTCGGCGCCGATGATGTGCGCGATCGCGATGATGTAAGGCAGCGAGGGGC  
GCATCTCCGGGTGGACCGTCAACAGCTCGAAGAAGCGCCCGCGCAGCAGGTGCTGG  
GCGACCATCAGATCCTCGGTCAGCTCCATGGTCGCCACCTGCTCACTCTGGTCACGC  
AGCTCGATCGCTCGTCCGTAGCCGAGACGCATCACGTTGTGGCCATCGAGGCGCGG

ACGCTGCGTCAGGCCCCACACCTCTTTCAACAGCACGACCGCCTCATCGCGCGATTG  
GCGCTCGACCTGCAGTAGGCCTGCGTCGTCCAGGTCCGGCATCGTCATGCACTCCCA  
ACCTTGCCGCCGGCCTTGGTGTACGCCGCGATGAGCTTCTCGATCTTGTGCTCTGGCT  
GGCCATAGCCGGCACCCGGCAGGCTGGCCCACAGGTTGCGGACCTTGGCCACCGCC  
TCCACGAAGCGACCGGCCTGGATGTCGGCGATCGCGCGCCGTTCTTGATCAGCTGC  
AGCGCCCACCGGTCCTGCGAGAGCGGGCCGAAGTCCGGCAGCTTCAGCAGGTCGCG  
GTAATGCGCGTAGTCCTTGAGCATGAACTGGTAGCGGCCAGACGCATTGCTGGTCAG  
CCCCTTCGAGTTGATCGCCTTCGACTTGCGGGCCGCCGGCGAACGGATGCCGGGAATA  
GTCGGTGAAAATCTCCGGCTTGCGATCAGCGCCGGTGACGATGACGTCGTACCCGG  
CGTTCTTCGTGGCCGGGCTGGTGGACGTGCCTTCCGAATGCGCAAGCATGTCGAGGA  
AGGCCACGACGTTGCGGGCCACCGGCTTGTTTCGGGCGTGATGACCGCCATTGCTGTCT  
CCAAACAAAAAGCCCCGCCGGCTGGCAGGGCTGAGCCGCGCGTCGGCGGGCGGAATA  
GGTGCCGGTTACGGTTCCGGCGCTGCATGCGCAGCCGTCTCCCGGGCGTCTCTCGAC  
GAGCCGGAGGTGCCGCGACCGGGTACTCCCAGTCCAAGCGGCGATAGGTGCCCGCT  
CCGCTGCCGGCTAGGCATAAGAGTTGATCCGGTCTGGGATGCGGGCATTGAAGAAC  
GGCGAGCACCGCCGCGGTGGTCCTGTCCCTTCAGCAGGTCCGCTGCGCCGCGCTGGT  
CCCGCCCAGCTGGGCAGATCGCGGCAGTGCTCTCCGATAGGTACCGACCGCCGCCG  
GCGGATTGGTGGGCGGCGTCATGTCGCCGGCCCCGTGCGCGATCCCGGCGCGCAGCG  
CCTCGCTTCTCGACGAGGACCTGGCACGCTGGCAGCGGTCCGGTATTGGGGCCCCCAG  
AAACGCGAAAACCCGGCGCTGGGCCGGGTTTCAGGTGGAACCTTTTGACAGTTGCAG  
AATTAGGGCATTTGCGTGTGCAACTTGTC AAGCGGCAG AATCACTGACACCTCTACT  
GTTGCAAGGGATACAGATGGCGAACGGAATTACGCTCAGTGACGGCCGCATGATCA  
ATGCGGACTACATCGTCTTAGTAACTTCACTTGTGCGGAACGGGCGCAATTCGGGTT  
TCCGAATAGACCTCAGCAACTCCCAGCAAGTAATTGTCAGCGGGGACGAGTCTGCT  
GCTGCCCAGGACTACTACAAAGTTTGCCAAGCAATCGGCGTTGGTCGCTCTGTCAGC  
AACCTTTAAGCGGCGACAGCTACGCCACTCAGCCAATCAATTCCACGTTGTAGCTCG  
CGGCGGTACTGCCAGACCGACAAAGTGCCGCCGTACTGCTCTGCCACCATCCTGGCC  
TTTACCGCCTGGCTCGCCGCCACGGTGAACCTCTGTGCGCACCAACAGCAAGCGCAGT  
GGGAAC TGCTGGACATCGAGGCCAAGGCCCGATCGATCCAACGCAGGTCGTCGGG  
GATGCCGATGTCGACGGCGACCTCAGGATTGTCGTGCGGCCTGTCGGCGTCATTTCG  
CGCGCGCACCGGATCGACAGCCCATGCCGGGATTTCGCCCAGCGCTGTCAGTCCGG  
CCTGCTCGGCCATGAAGCGACGCCGCTGCCGACCATCGCGCTCGACCAGCTCGCAG  
AAAGCCTGCTCCACCGTCTTCGGCGCATAGTCCTTCGCGTTTTCCAGCACGTGCCGG  
CTGCGGTGCGGCGGGCTCAGGGTGTAGCGGTTTGCGTGGGCGTATCCCCAACGGCG  
CAGCTCAGCGAGCAGCGGATCTTCCTTACGCCGCATGGCGAAATTCCTCCAACGTTT  
CATCATCCAGCCGGAAC TGCGGCAGCCTGCCGTCTGCTGTCCTGGCACATCCCCATCTGCC  
GGCTCTCGACGCCTTTGCAGTGGGTAATCCCGAAGGTCTGATCCCTGCAGGTGCAAA  
ACGCGCACAGCCCACGCTTGCGCACTGCCGCCGCGTACCGCTTCCGCAGCAGCTTCT  
CGTAATAGGCCTCGGGCCGGCTCAGGTTTCGTTGGGTTGAGCGTCATTTCTCTCCCG  
CTTGATCTGGTCCGCCACTCGGCTGATCTCAGTACTGCTCGCATTCGAGCGAATGCG

CGTCATCTGCCCCGAGTGCTGGCATTAGTCTTGACGCGTTCGCCCATCAGGCTCAG  
CTCGGCCTTCATGCTTGCCCAGCGGTCTCGCAGCATTCGGTCCTCAGTGGCAAGCTG  
CATCAGCAGCCAGATCGGATTGATCTTTTCCCCGCAATCGCGGCAGGTGACCTCAGC  
CTTTTTTTCGTCGACCTCCGTGTGGGCGTGCCGACATCCACCATAGTTGTGGACAACC  
GTAAGCGGGCCAGTCACGTCGCCCTTGGTGCGCTTCGGCAGCTGGACAATGTTGTCTG  
GTGGGAATACGGCTCATGCAGCGAGGGCTCCCGGCTGGTTCTTCTGCTCGTGCCACA  
GAGCCAGCAGCAGAGCCTCGGCGCGGCCGTATCCTTCTTGCGCTGCAGCTGCGGC  
GCGGCGGACGGGAAGCGGCGGATGGCCAGCTGCCGCGACGCGTCCTTGTCTGACC  
GATCAGCCCCGAAATGGCGCTTCCAGCTCTGCGGCTCGGCCAGGTGAAGGGGATGC  
CCATCACCTCGAGCACAGCCTTAGCCTTGGCGTAGCTCTCGCCGAAGTTCATCGACG  
ACTGCGCGCCTGGTTTCCGGTCCCCCTTTGGCGGCATTGCACGAACGCGCTCCACGC  
AGCCGGAGAAGACGGCGCCGGGATGCTGGCTGCGGATCTCCCGGATGAAGACCGCG  
ATCGCACGCGCATCGACTTCCTGCTTGTTGCCGACCGCCATCGTCGGCATGTCCAGG  
ATCGGGCCAGCCTCACCGTCGAGCAGCGCGGAACGGCGCCGGACATGCCGGGGTC  
AATTCCGAACACAACGCGCAAGGTCATCGCGCACCCGCCTTCAGCACATAGGCGTG  
CTTCGCCCCGCTCGCGTGTGCTGGCGAACGCCTTCTGCTTGCCGACGGCAACGCGCCG  
CTCCACCTCGGCAATCGTGTGCGCGCCGTGCGGGATGGCATCGATGCACCGCGCGTA  
GGCCGGATAGGTGCGCGAGAACTCTGCGACGCTGGCGAACACCTTGCCCTCGAATC  
GGATCGGGGTGGCGGTCATGGCTGATTCTCCAGCGCGGCCAGCAGTGCGTCGCCCT  
GCTTAAGTGCCGACTGCGCGATCCACTCGTGCACCTCCATGCCGTGCATCACGGCGG  
CCCGCGAAAGGCGGTTATAGCTGTCTCGGTCTGGCTGCCGACGAGCCCCCTGCATTG  
CCGCCTTCGCGAACTCTTCGCGCTTGGTCAGACGCTCCACGCGCTGATCGCCGTTTCG  
AGATCAGCTTCGCTGATTGCTGGATGCTCATGCCGCACTCCTGAGTTGCATCGACAA  
AGGAAGCAAAAAGGTGATTTTCGTAGTGGCCGTTGGTCAGTGGTCCGACAAGGAAGC  
CGCCATCGGGATGCGGATCCCAGTCGTACCCGCCGCCACATGCGACGACCGTGTGG  
TTCGTGCCGCGAGGGCTCATCCCGCCAAGCAGGTAGCGAATGCCAGGATTGCGAGA  
TTGCATGTAGGCGAAAACGCCCTCCACTCCGTTATCCGGACCGAAGGAGACATCCA  
CCGAACAAAGGCCGTGTGTCCCCAGGAATTCCGCCACAGCCTCCTCCAGTCGTATC  
CCCCTGGGTGGCGGCGAGCTGTGCGAAGTGCGGCACCTGCCACGGCTCCAAGTCC  
ATCAAGCAGGCGATAGCCGTGCGGTGGCAGTCTCCGTAGATCTCGTTATGCGGCTCG  
TGCCGGAAGAGTTGATGCCGCCGGATCATGCCGCCTTCCTCCGCTCTGCATCGGCTT  
CGTCCCAGCCTTCGCGCCAGGCCTCGCGGAGCAGTGCGCCCTCCTCGCCCATGGCGT  
ACTTCGGTGAGTCGTCGCGCTTCTTGCTGGCCTGACGCGCGCGGTGGCCGGCGAGCC  
GGGCGTTCTCATAGCTTTGCTGGTTCATGCTGCCCTCGGGATGTTGAGTAGTTGGTCC  
TGGTAGGTCTGCCAGGCTTCAGTGCCGCGGCCGCCAGGACGTCGAACGTCCAGGC  
GCGGAACCTCGCGGGCGTGTTGCTTGAAGTGGGTCCGAAAACCTCGCGCATGCGGT  
CGCGGGTTCATGCCGGGCATCTGGTCGCCGTCTGGTGCCAGGCGCCGAGCGCGACG  
ACTGCGTGCTGGCCGATCTGCTTCTGGCCGTGCAGGTGCCGAGGTTGCGGTGGTGG  
ATCTGCGTGTGGCCGCACTGGATGGCGCGCTGCAGGCCGGCGGCGATGCGCCAGCG  
GCAGACGACACAGCCGAGTGCACGCGCGGCGTCCTGGTAGGCCTGCTCAATTTTGG

TGGCAGCCTTGATCGCACGACGCATCAGGCGTGCTCCCTGAGCAGCTCCACCTTGCG  
TATGCTCCCGGCCTTCAGACCGTGGAGATAAGCATGGGCACAAATCCAAAGATCAG  
CTGGGCAAGGGCACTCGTGATTTCTGGTTGGATGTCGGCGGGCGCCGCGTTGGCCTT  
CGGCGTGCTTGGATTTCATCGGCCAAATTCGTTTCGGCAAGGACGCGGCCGCGCTGGGT  
GCAGGCGGTGGGCAGCATCGCAGCAATTCTGATCGCAGTAGCTGTACCTGCCGCTC  
AGCACAGGCTGGCGACAAATGCGAGATCTCAGGAGGCTGCTGACCGGGCGCGAAGC  
CTCGGCTTGACAGTCTCTCCCGCACATGATGTCTCTCGCAGAGAAAAACGGAGACATT  
TGGGCATATGAGCACCTTGATCACACGTCGAAATCGCGGGACCAGACCAATGCTT  
TCTGGGGGAGCGGACGGAGCAGGCACTCACCGTCCCCAAAGGCATTGCAGACGTGG  
TCGGACAACCTGCACGAGCTCGGCAGCGCCGCCGAAGGGCTCCAGCACGCCCTCTAT  
AACATCGAGAGAGCGCGAGAACTCCTGACCGTAGTAATGGTCGTGCCCAATTCGGA  
TAGCTTTTACGGCGACGAGCCGTTTCGAGAGGACTTTGATTTTCGAGAAGACGGCGTT  
TTATGACCTTATGGACGAAGCACTCAAGGGACTTACTAGGAGCCAAAACAAGATCG  
AAGCGCTGTTCCGCCACCCGAGCAGTCCACTCGCTCCCCGAAACAGTGAGGTCTTC  
ATGCAGCGATGCCTCTCTGCACGGACTGCCCTGCGCCATCATCCAAAACCTCAGCCA  
GCACGTGCTTGATAAGCACGTGCGCGTAGGCACTGCCGATGTGGCGAGTGATGCCTT  
CGAACAGCCGTCGGAACCTCGTCCTCATCCATCGAATCGAAGGCCAGCGAGCGCGCG  
ACGATGACCGGGATCGTTTCGATCCTCGGCAGGACTTCGCGCAGCAGCTTCGCCGCG  
CCGGGACCGAAGGCTGCATCTGACGCGGCAAGCACCGCAGCAACCACCGGTGTGGC  
ATCCATGTGATCTGCTCGCAGCAGACGTTTCGCCTCGCGCTGCAGCTGCTTGATCGC  
CTCGTGGCTGTCCAAGTTCTCCAGCCTTCGACGTTCTCGACCATCAGCTGACCGAT  
CTTGTGCAGCAGCCGGTGGCGCCAGGCGTCGCGCGGGCGCCTTGATTTCCAGGCGTAC  
TTCCTGCCCCGCGCCGATAGCCACGCTGCTTCATCAGTTCGCGGTCGACCGGATGCTC  
GGCGAGCATGGCCAGCCTCTCCTCGCCGGTGTGATCACCACCACGCGCTCGATGAG  
TGCGTAGATCGGACGCGATGCGCGCTTGGCGCGGATCTTCTTCGCTGCTTTGGTCAT  
GGTCATGCTTCACCACCTCGTGGCAGCGCTGCGGCAAGGCCGCGACGACGCGGTGC  
TGGTGCATGCCGGCAATCGGCGCGCTGGCGCTGGTCTGTCTGGGCTGCCAGAACTC  
AGGCAGATCAGAGAATCGGAAATACCCTGGCGCATATGCGACTCGGGCCGTACCAG  
GCGCACCATCTCGCTGGATGGCGGGCAGTCCGCGGTGCCTTCGTAAGCACTGT  
CCTTGTGGTAAATCTCATCGCGGTAGATGAAGACCACAGCATCCGCGTCTTGCTCGA  
TCGAACCCGAGTCGCGCAGGTCAGCCACGATGGGCCGCTTGTCTCCGTTGCGCTTCT  
CAACATCACGATTTAGCTGGCTAAGCAGCACAAACAGCAACGTCGATCTCGCTTGCCA  
TTAGCTTGAGCGCGCGCGTGATATCGCCGATGCCGGATGCTCGATTGTCACCGGATA  
CGTGCATCAACTGCAGGTAGTCGATAACCACCAGGCTAAGGTTTCGGGTCTTGTGCCT  
TCATGCGGCGCACCTGTGCACAAACGTGCTGCACCTTGGCGACGCGTGGGCGGCTG  
ATGCGCAGCGATGCATCACCGATGCGCCGAGTCCATTTCGGTTACGTTCCGCCAGTCG  
ATTTTCGTCCAGTTCACCGCTGCGCATGCGGTTTCCGCTGACGCCGGCCAAGTTGCAC  
AGCATGCGTTTGCCTAATTCCTCAGGCTTCATTTGAAGCTGAAGAAGGCCACCGAG  
CGACGTGCGCGCAGCGCCACTTGCTCGGCAATGTTCTGCGCCAAAGTGGTCTTGCCC  
ATCTTCGGACGCGCCGCCAGCACGTAGAGCCGGCCACCCTGCAGGCCATCGAGCAA

CGCGTCCAACTCCCGCATTCAGTCGATAGGCCCCGTGATCCCAGCGTCGCGCGTCGA  
TGCATGCGACAACTGGTCGAACACGCGCGCCATGACTGGCCCGACCGCCTCCAAGT  
CGCAGGGCTCGTTATCCAACAGTCCGCCGATACGGCTCTGCGCATGCCCTACGAGAT  
CCAGCGCCGTGCGGGCCCGCGGGCTGTAGGGCGTCTCCATCAACTCTTGGCTGGCTT  
GGATCAGGTCTCGCAGCATGGCCTTCTCGGCCACGATTTTCGGCGTAAGCGCGGATGT  
TGGCGGCTGACGGAACCGTTGAGCTCAACTCGATCAGGTAGGCCCCGTCGCCGACC  
AACTCAAGCTTTCCTGCGACTCGAACCATTGCGCCGAGAGTCACCACATCGATAGGT  
TGGCCTTTCTGGGCAAGTTCGCAGATGGCTCGCCAGATCAGTTGGTGATCGCGACGG  
TAAACGATTGCTCCGACAGCAGGTGCGTCACCTCCTGCGCGGCGCGGTTGAGCAG  
CATCACCCCGCCGAGCACCGACTGCTCAGCATCGATGCTGTGCGGGCGGCACCCGCA  
GTGCCTGCTGGTCACCGTACAACCCAGCCAGACGGTCGACATCGTCATCACGCTCGG  
CCCTCATGCTGCCGCCTCCGAAAGTGCTCGATCAGCGAGCTTGGCGATGGTTTTCTC  
TCGCAGCAGGACTTCGAAGTCAGGCACATAGCTCTCGTGCCCAGGCCACCTTTCAC  
ACGGCCGGAGTAGAACTCGTCATCAGCAGCGGACTCGAAGTAGAGCTGCCAGAACT  
TCGGAGTGACTCGCTCGCTGCCGAACAGCTGCTGGCACAGTTGCCGAACAGTCGGC  
AGACACGCCTCGATTGCCTTCAGCCTTGGCTTGTTTCAGCACGGTGCCTTCGACAGC  
AGCCCATTCGGCTTAGCCAGCGTGGCGTTGAACGCCGCTTGAGCGTCCTCAGCGATC  
TGGCGAATGCGATCCGCTCGTTTGGCCTTCAGGTGCGCTGGCGGGGAACGGTCGCCC  
GTCAGCGTCAGCTGCGGGGACGACTCCGAGCGAAGCGAGGATGTTTCTTCCTGTTCC  
TGTTCTGTTCTGTTCTGATTAGGCATAGCCTTAGGGGAAGGCTTTCGGAAGGC  
TTTCCGAAAGCCTCATCGAAAGCCTCATCGAAAGCCTTTGCGAAACCCTCTCCGAGC  
TTGCAAACAAAGGCTCTCAGGCATTCCAAAGCCTCCGACTTGAGGGCGCATTCGGGT  
ATCAGGTGCAACTCCGCAGCCCAACTGCGCACCAACATTTGGCGACTCCGGGCGGTTG  
TGCTGGATGGCCTTGGAATCCACACCACACGCGCTTTGAAGTCGGCTTTGACCATG  
CCTTGCCCGAAGGCTTCCGCGAAGGCTTTGTGCAAGGCTTCCAGTTCCCAATCGAGA  
TCCTCAGCCATCGCGGGCCCGGCCGCGCGGAACAGTCCAGGAATAGGGCCGGTGTG  
GGGGCCGGTGATCAGATACAGCCACAGGCCCTGGCCGCTGGGCGGCATCGGCGAGA  
GCGCGCGGAACCTTCTCGTCGCCCCACGTCTGACCTTACCTTGCGGTAGCGGCTAC  
GCGCCGACCGGGTTTCGGTGTCGGTGCTCATAACAGCCGCCCTGCCCGCTCCATGCG  
CTTACCTGGCGATCGCTACGGCCTTCGCACTCGCGCTTCATGTCTAGCCAATACGC  
GCGTGCAACGGCCTTCTTGCCAGCGCCCTGCGCCTGCCTCAGCAACTCTGCCAAGCG  
GCGGATGCGGCGCTCCCGGCGGCAGTCTTCGAGCAGCTGCAGGATCATGCTGCGGC  
CCTCGTGACCTTGGCCTCGGCGAACGCGGCCTGCGCCATCTGTCCGAAGATCGCCTG  
CAGCTGGCCGCACAGCGTTGCCAGTGCCTTCGCCTCATTGAGGGTGAGCACCTGGTC  
TGCGTACGAATCGGCGATGAGCTTGAGAGCTTGCCCTTCAGCTCGCCGGCATCCAG  
CAGAGATTCGACAACACCGCCGCGCCAGCGTCACGTGCGCGCGCTGGACGATGAAGT  
CGTGCTCGGCGGCCAGCGCGTGCAGGATCCGGAAGTCGCCGCTCAGCCCCATGATC  
TCGCTGGCTTCGGCCAGGGTCAGGTGGTGCGTGCGCGTGTTGCGGTTGACCTTGCTG  
CGAAGCACGGCCGCAGACATCGGCTTCTCTTCGCCGCGGTGCTTGATGGAGATGAG  
GCGAGTCGCCAGGGCAATGCTGCCGCCCGGGTAATCGCGAACGGTCTTGTGTGCTG

CATCGGAGATGTTTCATCGGCGGGATACCTGAACGTGGTTCGTGAAGGGACCATCCG  
CCACGCTTTGCGCCATGGACGCACTGCAACGACGGATCAAATCAGCGAGAAGAAGG  
GCCCCAAACGTACGACGATCGTGCGTGTGGGAGGCAACGTGTTTGGGCTGCGGTG  
GGTCGATGGCCGCATGCACGTGAAGCTGTTACGGAAGGGCTGAAACGTGACCAGGG  
AAGGTGTCGCCCCCTTGCGGTAGGCTGCTGTTTCCACACGAGCAGCCCGCAAGGA  
GGGCGACATGGAAGCGAACTCAAAAACGTCATATCCGATGGAAATCGGCGAGTCGT  
GCACCATCAACAATCACCACCCACAGCCTTAGCCGTGCGCCTATCGAGTGCGGGC  
GGATCAACCATCAACGTCTCCTCCCGCCGACTGGCACAGTCACCGTCGTGTCCCAG  
GGAGACATCACGTTGTTTCGAGGTGGACGTTATCGGGGGCGAACCCTCGGGCCGCG  
CGCTCTCGACTAAATCGATATGGGTGGTCCCGTCGGCTGCTATGTGCCGGCGGGCTT  
CCACGCCTTCGGGCAGTGAAAAGTTGATGTCCGTGCCCCAAGAATTCGGGTGCCCA  
CGGCGCGGCCGCGAGCTCTCATCCACGGCTACCGCAGACCTGCTCCGGAGTACCGAG  
TTGATGCGGCCGCGGACAGCGATGTCCTGCGTCACAGTCGAAATGATCACTTCTTGG  
AGCGGCGGCCTGGCCAGGTCCGCGCGGCTCGGCTTGTTTAGCCAGTCGCGCAGCCG  
CACTCGCGGATTGAAGCGGTCAGGCAGCATCGGCCACCTCCCCTGCGGGGTTAGCC  
GGGGGCCAGATGTCGGGGCCGAGTTCGGTCAGAGAGACGGCTCCCTGGCTCTGAAC  
GTGCAGCTGGCGCACAAGGCCGCCATCGAAGCGCTGGCCTTTGCTCATCGCCTTGCG  
GAGATAGCCAATGGAAGTGCCAGCGGAACGGCGTAGTCGGCCTGCTCGGCTGGGG  
TCAAGGTCGTGAGGTAGCTGCGCAGAGTGTCCATGCGCAAACAATACCCTTGGGTA  
ATCATCAAAGCAATACCCGCGAGGGAATTTACTTGTAGGTAAGTGACAGGCTGCAAT  
ATGAGGATGGACAAATACGAAACCCGTCGCCTCGCCCTAAAGGCCTTCATCGACTC  
CCTGGGCCGCGGTGGGACAGCGCAGGTCGCATCGCGTATTGGCAAAGATGCGAGTT  
ACGTGTCCCGCATGCTCTACGACGAGGGCAAGCCTGGGAGGAAAAGGATCGGGGAG  
GACACCCTGGAAGCGCTGGCTAGGGCTTACCCGGAGAAATTTGGCTCGTCGATTTCT  
GTCTCACCAGTCCCAGCGACTGAGACGGCTGGGGATTACGTTTCGCGTCCAACACTTG  
GACGCGGAGGCAGGCATGGGCGAAGGACGGATCAACGACGACTACCCAGAGGTGA  
TTCGCTCGATGGATTTTCGAGCCAGCTTACATTCGCTCAGTCGTGGGGTTTCGTGCCGC  
CACCCGGCCGTTTGATCCTCATCACTGGCCGCGGTGACTCAATGATCCCGGTGATTC  
AACCAGGTGAGTCGCTGATCGTCGACACAGGTGTCGCAGGCTTCGACGGTGACGGC  
ATCTATTTGATCAACACTGGAAACGGGCAGCAGATCAAGGCACTTCAGGATAGAGG  
CGACGCCATCTATGTCGTCAGCGCCAATGCCGGCCTCTACCCTGCTTTCCCTCTTCCC  
GCTCATGCTCTGGTAGCCGGAAGGTTTACCTGCGCAACCGCATTGATCGATTGAAC  
TAGGGGTGTAAGGGATGAAGTACTCATGGGTCACCGCCGCTCTGCTATCGCTGCTGC  
CTTTGCATGTAGCAGCAGAAGATCAACCTCCAGCGCGTACCTTTTTGCAGGAGGTCA  
ACGGCTCTTTTGTGAGCTGCCCCGATTGCTGGGAGAAGAAGAGCTCAACAAGCGTC  
TCTATGGCCGAGCGGCTCCGAGCAACGCGGGAGCAATCGGCGACTGTGCAAACGAC  
GGGCGTGCACGTTTACGTGCAGCATATGACGCATATGTCGCGTCAAACCCAGGCGCT  
GAGGCGAAGTCTTCTGCAAAGAGCCTGTACGCGGCGTCGCTCGCTTATGGCGACGC  
GCTCATCAATGCCACCTCCAGGCGCGACTTGGACAACGGCATTGCACAGGCAGAAC  
TGAGTAAGGCTAAGTCGATTTTCATCATCGACTCTGGGTGTAACTGGCAGTGGCGG

GTACCGACGAAGCGTTCCAAACAGCGCTCATCGAAGTGCAACTGCTGACAGCTTTCT  
TGAACAAAACGCCTTTGGTTCCGGACGAGGTCAGCCTTGCGCTATCGCGGGAATACT  
CTCGATCAATGTGGGACAAGATGCTTGCTACGGGCTGCACCTTAGGCGAAGCATCA  
GGAGGTCCGGGGACTGCAATGGTGACCCGGGATCACGCGGAGTTTGTTGCGTATAT  
GAGGTCCATTTTCAGACGACCTTGACGCGCAAATAAAGATCGTGAAAGAAGGTGTTG  
AACACTACCTCCGACATGGCGATTCTCCGCCGCCGGCGTACGCGTGCGCGTGGCCG  
TGATCCTGCGAAAGCGCAAAATTTTCAGCGTAGAGGCTGATTTTTTGGAGGCATTG  
CGGCGCATTTCTGCCGCGAGAGCGTAGGCAGAAGAGAGATCCAGATAGCCCAGAGG  
GCAATTAAGGCCAGAATGCTTGCCACACGGGCCGCCACGGCCGCATCTGAGTAGCA  
CCACAAGGCCTATCCCAGCCCGACGAACGAAGTTTTGCCCTGTCACGCTACGAGGC  
GCGCAGCCCCGTAACCAAATAACTTACCTTTGGGTATTGACTTAAAAGATACCCGCG  
GGTAACTTACCTCCATCGCAACGAACACCCGGATCCCGCCGGGGACGTGCGACGG  
AGAACGTAGATGTCCAGCACCCGCTGCCACCCGTACCACCCGCAATGCGGCTGCGC  
GACCTGCAGCCGGCATGAGCTGTCCGACGAGCGCGCCGACGTTCTGGCGCTGGCCC  
TGCACCGCGATGGCAGCGTTCTGAGTGAGGCGCTGGGCGAACTGACGACCGAGCAG  
CTGGCCCTGATTGCCGGCCATCTCGCCCAGGGCAACGACGAAGGCGCGGCAGAGAT  
CCTGCGCAACGCTGTCACCGACTACCTGTCGCAGCTGATCAACGGCCGCATGGACG  
ATGTGGACTGCTCGCGCATCGAAGCGGTGCGCCACTACCTGACGGTCTACGAAGCC  
AAGCCGGCTCCGGTTGCCGTGATGCCGTGGCGGGTGGCGGCATGAGCACCACGACG  
ATCCCGCGGTGAGCGTCTTCATCTGCGACTGCTGCATGCGCGCGGTAGGTCTGGCT  
GGTGTCCACCGGGCTATGGGCGGGCGGCCTGCATGTGCGCCGGGATGCCCTGGACCT  
GCATGGCTACGCCTGCGCAAAGGCGGACATCGAACTTGACCTTTGCGACGAATGCC  
TGGGAGCGCTGTGTGAGGCGATCAATCAGCGGTGCGACGCGATCCGCGAGACGTTG  
ACGACCAACGGAGGCGCGGCATGAGCGCGCCTGTCGATGTGCTGGCGGTCTGTGGAT  
TCCGTACTGGCGCACCACTGCAAGGCGAATCGATTAGCGACGAATTGCGCCAAGC  
CCGGGCGGCCATGGCCGAGCTGATCGAGGCTGCAAAGCACGGGCGCGAATGGATCG  
TCGAAGTCGGAGACCGCAAGGGCTTGCCTAATGGCGGAACCCTGCATCGACTTGAT  
GCAGCCCTCACCCGTGTTGGCAGTGCCACATGAGCGCCGTCATTCCCTTCCCCACCG  
CTGCGCGCGGCGCCGATCTGGTGCGCGACATCGCGCTTGATCGTGCTATGGCGCGA  
TCACCGTGGCGCAGTTGGTGCGCACCTTCCAGCCCGACAACGTGCGCCCTCTGCGCG  
TGCAGGCATCGCAGCACGTGCGCGATCCGGACGAGTCGGCAACGACCTACTTCGAC  
GGTCCGGAGGCAGCCTGACATGCACGAGCAAATCGACCCCGAGTTCCAGCGCTTCA  
TGCTCCGCGAAGACGCAATCTTCGCCGCCTTCTTCATGTTGATCGGCGCCGGCGCAG  
CCCTGCTTCTGCAGGCGGTGTTCTCGTGACCGGCCGCTATTACTACCGTTTCCTGTTC  
CTGGTCGAGTCGATCCTGTTTCTGGCCGCGCTGGCGATCTTTGCCTACGAACAGAAG  
GCGCACGCGATCTGTTCCGCCCTGCTGGTTGTTGCCTTCGTGCTGTCACTGCACGTGC  
CGGAGAGCTTGCGTAACGCCCGAGCCCGAGCCCGTGCGCACCGCGACCAGCCGCAG  
CCGGCCACCGACATCACGCCCGATTTTCCGGAACAGCCGCGCCGCGGCATCCGCTG  
ATCCCCGCCGGTACGCCGGCACCAACCGACGAGGTATCCAATGTTTCAGCTTGAAAG  
GCACGAGGCGTCCATCGCCAACGTCAACCAACGCATCCAGCGGCACGGCGAAGAAC

GCAAGCTGGCTGTCGACATCAAGTACGTCTTGAGCGTCAGCAACGAAGCGCTCGATT  
CATTCTCGACTCCACGCTGCGCCACGACCTGTTCCGCAAGCCGGCGAAGGGCGAGCAG  
CAGGATCTTCCGCAGATCGGCGGGGACGGCCTGACCGCCGTAAAGCATCCGGCGCT  
TGAGCCGCTGAAGCTGAGCCACGAGTTCACCGGCTACGAGATGCACCTGGCCGGCC  
TGCTGGAAGCCGGCGATCCCATCATCCTGGTCGACGTGAAGCTCAAGCGCTTCGTGA  
TCGAACCGAAGGAAGGCGGCAGCCTGGCGATGTCTGTTCACTGCATCGGCCGAGGTC  
GAGCCGCAGGAAGTGGCCGAGCTGTCTGAAGCGCTGATCCGCGAAGACGTGCTGCT  
GACCCTCCTCGCTCCCAAGCGCGGCGCTGCGGCTGTCGAGGATCTGACCGAAGGCA  
GCGACACGCTCGATGCGCAGGACAGCGCGGCAGCTGCTGCCGAAGCCGCGAGCCTG  
ATCGACGCCGGCAAGAAGGTGGCGGCATGAACGCGCCCCTCTGCATCCCGCTGATC  
GACGTGGAGAGCCGCCAGATCGCCGCCATCGGCCATGACGCCGCCAGCCAGACGTT  
GGCCGTGCGCTTCAAGAACTGGAAGGGCGAGATCACGTGCTCTACCACTACGACA  
ACGTACAGGCCGACGACTACGCAGCGCTGCAGGCGGCCGAGTCGAAGGGCGGCCAC  
TTCAACAAGGTGATTAAGGCCGACCCGGTGCGCTGGCCCTACCGCAAGGTCTGAAGA  
CCGCCCCTCTCCGACGCAGCCTGATCCCAAACCCTGATCCGTGGCAGGTGTCCACG  
GACGCGATCGCACCCGCGCATTGACTCTCGAAGGTCAGACGTTAAAGGCAGGAAGGG  
AACCGCACGCACCGCCGATATGTGCGCGAGAAGGAGCGGAAGGCGAAAGCCTATG  
CAGCCGGGAAAGACCGGTCCCAGCGAAAGCTCATGGGTGAACGAGTGATGCGGATG  
CAACGCCGCTGACCGCCGGGAAAGACCGGCCTCTATCCATAGCGGAGCGGCTTGCG  
ATCAACGAGCGTCCATGTCTTGCGTATCGAAGACCAGGCCGCTCCGCTATGGAGGG  
AATCTGCAGGCTGATTAAGTGGCGTGTAGCTCAGTGATAACTGCCGACCCCGGCGCT  
TCATGGGCGCGGTGAGCAGTTGCGTAGGGACAGGAGGAAATCGGAGAGAGAGCCG  
CGTTGTGCGCACGGCGCGGTGATGTATCCGAAATAGTCCTAAACCTGAGGCTTAGAG  
CACCCAGCGTGAAGCTGGGAGGTGCCCCGTAAGTGGGCCACGCCACTTAATCAGCT  
TGCAGCCGGAGATCAGCACCGGCCCTCCACCCAGTAAGTGCCGGTTCGATTCCGG  
ATGGTTGGCCGACGGCTTGAGAGCGACGAGATGCGGTTTCGATTCCGCGATGGGGGCT  
TGGAGCCCAAAGGCCCGCGTGGTACCGGCGAAACGGTGCACCTAATTCAACACGCC  
GGCGCCGCCGGCAGGAGATTGCAGTGAGCAACGTAGCCGTTATTCCGCAGAACCAA  
CAGGGTGCGCTTGTCGCGCAGCCGCGCCAGCAGTTCGACCTCAGCCCCGCAAACGTT  
GAGCAGGCGCTGACCTTTGCCGATTACCTCGCAGAAAGTGACCTCGTTCCGAAGGA  
CTTCAAGGGCAAGCCGGCGAATTGTCTGATCGCAATGCAGTGGGGCGCGGAGCTGG  
GATTGAAGCCGCTCCAGGCGCTGCAGAACATCGCTGTCATCAACGGTCGCGCGGCG  
CTGTGGGGCGATGCGGTGCTCGCGCTGGTTC

>CONTIG\_4\_length\_21339\_cov\_15.209693

GCGCCTGTAACCCGGGGAATTCCCAAGGAAAGTGCCAGAAATGGCGGAAGATCCGA  
AGATCCAAACGCGACTCTCCGGACCGACGCGACATCCCGCACTCTCAGGCCTCGTTA  
TTCAGACCTTCCCTAAGAAATCACTAACCAAGCATTCTTTTACCCCCGGCCAGGGTT  
CGTCCTGACTCTTCTTTTGTAGCAAAAAACCTCAAGCCGTCAAGGGTGATCAGTGTG  
AGCACCCCGTGCCCCACAGCTTGAAAAAGATTTCAAGCCACGTCGCGCTCGCGTTCC

TTCTTTTCGCACACGCGCCCTGCCCTTCCCCGAGCTCTCGGCCACCGGGATTGAAGCG  
GGATTTTTCGGCCTCCTGTTCTTTCTTGACGTGCGGCAGCGGTTTCGCGCTCGAACGCCG  
GAATGTCCAAAAAAGCCATGACCTTCTCAGCTTGGCTCGCGGCGCGGAACAGGCAT  
TTGGGGTTCGTCCGAAAGGGCCTGCATCCAGGACTGCAGGTAGGCCGCATGCTGTTCC  
TCGTGCTCCTTGCCCAAGCCGATGCCCAGGCGCTCGGAGATGAAGAGGCTGGAAAG  
TTCGGCCACCAGTTCTTCTTTTTCGTAGGCTTCCGTTCCCCTGGCTGCCAGATCCCTG  
TCCAACCGGTGTTTGGCTCCTGTCCAGTGCGAAAGCTCATGCAACAGGGTGGCTTGA  
TAGTTGATCTCGTCCGTAAACGCGAGCCCGTTTTTGAAGGTGAATCGAGTCGGCGACA  
AGGCTGTAAAAAGCTCGGTTGCCGCCATCGTGGTGGAGCTTGGGCTTGTGCTTGTTC  
AGCAACTCCCGCATTTCGTAGGTTACGAATGGAGTCAGGCATGACAAACGGCGACGG  
GGGTGGCAACCCTTCGATCTGCGACGCGTTAAAAACACTTGCCACGAAGACGTTGG  
GGCCTTTGTATGCCTTGTCTTCGCCTTCCATCACGGGCGCTTGC GCGTCTCTTGGGG  
CTTGCCGGTTTTTGGAGAAATCCCAGTAGGCGATCTGCTGGCCCACTTCCCCTCGGCG  
CACCTGTCCGCCAACAGCCAGCGCTTGCTTATACGTCAGCCAACGGCTGTCTCTGTA  
GCCGTTGACCAGCTGCGCCCCCTCTCAGGATCAGCGTGTTTCGAGCCGCGATAGGCTTT  
GCCAGTGCTCGGGTTGTATGGCCCGTGATGCTGCCGTTATGCGGGGCGCTGGCGTC  
GTTCCAGGGCCGGCGCCAAGGAATGGTGCCCTGCTGCATGAGGGCGAGCATGCGCT  
CGGCGGTGGCTTGATGAGATCGGAATACTTGGACATGGGGTGGTGCCTCAAATCTT  
TTTCAACCGCCTGCGCCTCTTAAAAACAGGTGGTTGTGGGTGGATGGGTAGAGCTCG  
ATGTGTAAGGTCAGGGACTTGCGATGGAACAATGCCCGCCGGACCAGCTCGGCGAT  
CTCATCCTCGCTTCGCGAGCCCAAGGTCGCCTTCTTTTCTAACTTCACATGGAAGCCG  
AAGGCCGATTGGATCAGCAGGTATTGCGGATCGGATTCGGGGCCATCTGGCCCTTCT  
AGGTCAGCGGCGGTGATGGCCTCTTCGTGAAAAGCGTCGTCGGGGATGTTGGAGAT  
TGGCGATGGCATGGGAGGGGTTCTTTTTCTGAGGGATACCCCTTTGCAATACCTCAC  
CTGCGGCGGATGTAAAGCCCCGAACCCACGTTTCAGTGTCACCCAGGTTGGCCGCTCG  
CCCTTTTCTTCTCGATCTCGGCCTTTCGCTGGGCGCGGTGTTCCGACTCCCTGCGGTC  
TTGCGCCTTCCATGCAGCGGCGTTCTTGGCTTGGCGCTCCCGGTCAGCGCGTCGCTC  
GGCCTGGACCTGTTTCGTAGGGCGTGTTGGTAAAGCCGAAAAGGTGCTGGATCGCCTC  
GGGCATCTCTGCAAAGTCCTGCTCGTCTCGCCGTTCCGCTGCAGCGGCCAGCGCCAC  
GTTCTGGGCGTCATTGGCCGCCTTGGCCTGCTCAAACCTCGGCTTGGCGGGCTTCTGG  
GGTCAGGGCCTCCAGCCACTTGAGCTCCTGCTCTTGTGCGCGTTCGGCGTCGGTCTG  
CTCACCGTTCCAGCAGCAGAGGTAGCAGTCCAACCTGCTCGCCTTCCACGCGCCGATT  
CGACGGACGCCCCGCGCAAGTGCCCGGCGGTCTTCAGGCCACGGGTGAACTGACGCT  
GCGAGAGGATTTCTCAGGTTCAAAGCCCTTTTTCTCGCACCAGGCCACATAGCGGG  
CGTGGATCGACTTGATGCTCTGCCACTGGTCGCTCCCGGCAGCATTGCCAAACTGCA  
CTCGGTCGGCATGGGCCCATGCAGCGATGGAATCGGCGCCGTGGATCACAGCCTGC  
TTGTAAGCCTGCGCGGCTTCCGGGAGCTCGTGGTTCGGCCATGAAGCGGCCGCGGGC  
CACGACTCGGCGAGCGCCTTCGAGCATCCAGTCCAGGAACAACCTGCCCTCTTCTTC  
CAGCAGCTTCTTGCTGAAGTCCGGGATGCGGTCGTCGGCCGGGATGACGTTGGCCCA  
CTCCACGATGGAAAGGCGACGGGCCACGCCGCCGACTTGTCGCGGAAGAACGGCG

CGGCGTTGCTGCTGATGATCCACTTAGCCTTGCTCTGGTAGTTCAGGACCGAGAGGT  
GCTTTTCGATTGATGGCAATCCCGTTGCCGCTGACGAGGGTTTTAAACGTGCCCTCCTT  
CCACTTCTCGCATTCCACTTCATCGACCAGGATCAACTGGCTACCCAGAATGCCTTC  
CAGCGCGAAGGTGTGCTCAACGTGCCCAGGTCCAGGCGGGCCACTTTGTTGTGCAC  
GCCCTGCACCATCTCTGCCAACGTTGACTTGCCGCTCCCGGCAGCTCCAAACCACCA  
TGCGGCGATTTGATACGAGCCCGGCAGCAGGGTCATGCCGCATTGTTCTGCACCAA  
GGCACGCACGCCCTCATCGGGCAACGCGTGGGGCCAGGAACTTCCCCAGCAAGCTGT  
CCGAGGGCAGTGACTTGGGGGTGTAGGCCTGCCCGGGCGTGGCGCCCGTTTCAATG  
GTCAGGGCGTGGGTTCATGCCATACCGCGGCTTGGGGGCAAGGGCTTGGATGCCGTC  
GGCGGTGATTTCCAGGTAAGCGTCCGCGCAAGGGACCATCGCCCGCTTGGCTTCCAA  
CTGCGGCAGCGGGCTTTGCTGGCCCCAGTCGCGTGGGGCATAGGCCAGCAACTGG  
CGGCGAGCTTGTGCTGGCTTTGGCCGGAATGTTGGCATCGAGCCAGTCCGACGCCA  
GGCCATCGCCCAGGCCGCGGTGGACCAAGGACCAGTGGTTTTCTGTTCCAGCGGTAG  
ACCAACGTGGACTGGGTTGCAGATTTCGTCGCGGACGCTGGCCCAGAGGTTACCGTC  
GAGCCCCAAGCGAAGATGGCTAGCAAACAGGAAATCCAGGCTTTCGGGGCGCAACT  
CCCCTTTGTTGAGCTTGGCCTGTTTGTGGCGATCCAGGGCCCCGGTGCTCCACCTTCAG  
GTTGCGGGTGTAGTCAGCGCGGTTTTTCTCCCAGTGCTTTTCGATGAGAAAAGACAC  
ATTTCGAGGGGTTGACGGCGGACGGATCTTGGTCGAGATTGGTTTCAGACATTGTAGT  
TAGCTCCAACGAACCCTCGCCCTGCCAGGCGGGGGTTTTCGCATTTGTGGGGTTAGGC  
GACTTGCGGCAAGGCGTTGTTCGAGGATGCGCCGCAGCTTTTCACTGGGAGAAATCCC  
CGAACGCTTGGCGTCGGCTTTCAGCCGTTCAATCAGCACCTGTTCCATTCGGGCATT  
GAACGGGGGCCTTTCGAATCGAGGACTGAGGGGGTTTTCTGCGACTGCATGGAATCTCC  
GTATTGCTTGTGTAATACATCCAAGAAAGCAGGTTTCCGAACAACGTCAAGCCCCAA  
GCGAAAAGAAAGTTTTTAGTTGCTGGTTAACTCTGCTGCTGGTTTTCTGCTTTTTCTT  
AAACCAGCACCCAAACCAGCAACTAAAAACACTTCAAGTGATTGATATTTATTTT  
TTGTTCAAAAAATAAGCTAACTGCTGGTTTGTGATTAAAAAAATAGCTTTTACGCA  
CGCACTGCGTCTCACGAGAGTTTGATACTTTTCGAACTACTTCACTTTTTTCATCGCT  
AGAAGAAATTTGAAAAAATAAACAGCAAACCAGCAGAAGCTTGAAAAGCTTGTCC  
CGTAAGGCTTTAGCTGCTGGTTTAGCTGCTGGTTTATGATTTGAGCGTTAACCAGCA  
GAGGCGTTAACCAGCAGGAAACGCTAACAAACATGGATACGGATGGATTCTTTTCCG  
TATGGTTTTGCCAATGAGTGGCTGGTAATAAGCGCCTGTCACTTGCGGGAGAAACAA  
AAGAAAAAGCAGCTCAAAGCAAAAGCGTCCGGAAGAGAAAGGCCGATGCCTTCGG  
CTTTTTTCCTCCCAGACGCTGTGCTTACTCACCGTTGGCGGGCCGCTGCAGCGCCGGCC  
ACCACGCCCACGCGGGCCATGTCCAGATAACCGCCCGGGATCTGCCCTTCGCTAACC  
GCCAGGCGAAGCCGGCGTGCCGCCTCCTCCCCATAAGCCACGAACACCGGGCCGCA  
GGGCGGCGCGTCCCCAGGTGTTCCGTCCTGACGGCAAACTTCAGCCTCCCCCGCTG  
GAACACGATGGCGCTCGTGGCAGGGTGGTTGAGCACGTGGTCCTGGAACCAAGCCG  
TGTCAGTCCGGGAAAACACCAGCGCGATGCCACCGCCCGGGTGGGTGGCCAGCTTC  
TGCATCCAGGCTTGCTGCCCCCGACCGAATGGTGGGTTCATGAAAACCAGAGCAGC  
TTCAGGCCAAGGCGTTGCCAAGCCGTCATCGCTGGGCCTGAGCATCACGCTCGCAGT

CGGCCAGGGCATGCCCTCTTCGGGGGTGCAAGGATCCAAAGCAAAGGGCCCCAGCC  
CGGTGTGGCCTGCGCGCGGATTGCCCCAGATCAGCTCCGGCGGCGTGAGCCACGTG  
TCCGTGGTCTGCGCTGCCGGCAGGCGGTCTGTAACCGACCATGGCGGACGCGAGCTT  
GGTTGCCCCGTGGGGAGGAGGTGTTCTTGCGGGGCCTTGGGCAGCGACAGGGCGTTGT  
GATCAGCGAGGACGTTTGCAGCATTTCATCGGTAAATCTCCGGTTTTGATTGGTGGTT  
GGGCAAAGCTCCGCCAGCACGGCTGGCTGGCCGCGTTCGCGAAAGGGTTGGGGGTT  
GGGCCAGGTTTGGCCCCGACTACTTCAGGCGTGTGAGGCCATCAGTCGTTGGCGGCG  
TCCTAGACGTCAAGGAAGCGCTCCAGGGTGGCGATCTGCAGGGTGAGAACCTGGTG  
GGCCTGCAGCGCCGTTCATGTCCCCGCAGGCCACCATGACCGACTGGGCAGTGCCTG  
AATCGACCTGGGCCAAGGCCTGCGGAAGCGCGTCGGCGAGGACGTGCGCCAAGGCC  
CGAGGCGTCAGCGCGGCCCGGTGGTGACGAGCGGCGGGCGGTGTCGAGCTGGAGGAT  
GATCGGGAGCATGTGCGCGGATCCGTGTTGGTGTGGGAATAGCATCCCCGAACCG  
CCGATCGCGTCTGGCAGAAAGGGACAGCTGCCCCCTTTGGCTTGACGACGGGGACAA  
AAAAGCCCCGGACGTGAGCCAGGGCTTGGGGATAGGTGCGACCTGGCGTCGGCGGAA  
GCCGGCGCCTCCCTGCCTTTTCTTCCCCCTCCGCTCTTCGGCGGGCGAGCAGCCGCCGC  
ACATTCGCTCCAGCGATCGCCTCTACTTCAAACCGAAACGGTGGCCGCTCGATGGG  
AGGCCCTGCGGGCGGAAGGGTCACGTCCAAGATCGCGCCGCGCACCTCACTCACTT  
GCATCTCAAACGCTCGGCCCTCTTCGATCCATTGCTCCACCAACGCTTTGTGGGCGTC  
CTGGGCATCCGCCTTGTCGTCTCTCCAGTGAGAGATGGGGAATCACGTTCTGGACACG  
CTGCAAGCGTTCTTGGATCTCACTTTTTATGCCTTCCAGCGCTCCTGTGTATTGGCTC  
ACCCACTCATTTTTGAGTGTCAGGTCGTCCCAAGGCAACTTAAAGGCGTCGGCCAGT  
GTGGCCTGCTGAAGCATCACGATCCCTCGGCTATCTTCCCGCAGAGCGCCGCCTTTC  
GCTCGGAACAAATCCAGGAGGGCCTCACGCTCCTCCGCGCTCCATCCCGCCAGGTTCC  
AGCGACGAAACCCTCCCCTCGATCAACGTGATGTTGACCTTGCCCTCCTTAAGGACC  
TTGAATCGCGCGCTTGGAGGCATTGGGGCCTTCCGTCCTAGCACCTCGCCATCTTCT  
CGGCTTTCCCGCCACCGTCGGACACGGGGGTGGGCATCGGCCCATTCAGCAACCG  
AGATATGGGAACGGCGGTGTGCGTGCCGTCTGTCTACCAACAGGGGACCCGTCGGAC  
TGTCGCTCTTGGCCAACTCGCGGAATGCCTTCTGCGATAGGTTAAGCAGCCCCGCCG  
CTTCTGCGGACGTCCAAGGCCTCGACTCGCTCGGACGCGCGCGTCCGGCTCTAGAGG  
CCACGCGTGCTGGTGATCAGCGACTGCTTCTTCTCCACATCCCGCTTTAGGCGCG  
CCCATGACACGCCCTTGCCGCTCATGAACTCAGGGTTCCTCGGAGGCGTAGGTCTCGC  
GGTAACGCTCGATCAGTTTGACGAGGACTTCTTGCTTGGAATCAAGAGACATGTGGG  
CTTGCCACCAAGAGGAAACCTGATGGTAGGCGATCAGAACCGGAACGGCTTGCGCG  
TGCTCTCTGGCGCCCGTGGGCGGCGGCAGCCTGTCTCCAGCCCTCTAGCGCGGTCTT  
GGTTGCGTGCGTGGTCCCGAGCGCCCTGGAAGGCAGCTAGCGCGTCCTTCATGGCGT  
CATCGAAGGGATCGCGCGCCTCGACACTGATCCACGGCTCCAGCAAGGCGTCAGCC  
AAGATCGCTTCCCAGACCTCGCCCGTATCCAACGCCTGGTCCCGCTCTTCCACCGGC  
AGGAGGTGCGCGTGCCCCACCACTCGCGCGTCTGCCGCACCCATGGTTGGGGCTCG  
GCGAAGACATCGCTCGGCGCGAGGATCAGCGCAGCCTGCTGCTGCGTGGGGTATTC  
CAAGAAACCCAGCACCTCGCGCCAGAACGCGATCGATTGATGGGTGGCCATCGCGA

GGGAAAGGGACGTCATGTCGGCCAGCGCCATGGACTTGGTCCGATCGGGAACCCGT  
CCGCCCTTGCGGGGAACGATGGGGTTGGCCCGGGTGACCGTGTGTCTTGTGGGCAAC  
GGCTTGGGGATAGCCAACCCAGCAGTATTTGCGTCCACCAAGCCGTCCAGCGCATC  
GGCAAGTGCCGTCACCGGCACCAACCAACTGCCACCGAGCTTGCGCAGACCTGGAA  
CGATGACGCCAGCGGCAAGCTGTTCTCGGGTTTGTTCGTAACCGCCCGCCCCGTCT  
TATTGAGAACACGCGCCACGTCTCGACCGACAAAAGCGGCTTGTCTGGGGAACATT  
ACGCGCAGGATGGGCAGCATTCCGGTTCATAGGCGGGGAAAATGATGGGAAAAAAG  
ATCCCTGGAAATCCCTGTTTTTCCCGGGATAGGGTTGGTCGACATGAAAAAGGGGCT  
GGACGGAAAACCGGCCAACCCCTTGATCTTACTGCATTTTTTGTTAGCTTATTTTGGTG  
CCGGAAATAGGAATCGAACCTACGACCTACGCATTACGAATGCGAACGATTCTCAT  
ATTAGTCAAGTAAAAACAATGACTTATTGACACCATGGGAAAATATTGGGAAATTT  
GAGGCATTGCAACGGATGCGGGATAGAGCATGGCACGACCCAAGAAAGCGGTTTCGC  
ACCAAGGGGGTCTACGACCGGGGTTCGGCTTGGCAGGTGAAGATCAAGCGCAAGGA  
CGCGGCTGGCAATCTGCACACCATCAACCGCACCTTCCCTTACAGCGAAGCGACCCG  
AGCCAAGGCTCTGGCTCAAGCTGAGGCGTTTCGCGTCGGCCGAGCGCGCTGCCCTAC  
ATGAAGAAAAGCAGCCGGCCTCCAGCCTTCTGGGCAACCAGACCTTGGGCGCCTGG  
ATTGACCGCTACATACTAGAGGTCTGCCCTCTCAAAAAGGGCGGGGATGGGGATGC  
CCGGCTGTTGCGTCTAGTAAAGGAGCGCTTTCCTGCCACTTGCGGCAAACCCGTCGG  
CAGGCTCCAGCCCCAAGACTTCGATCTGTCTAGACGGAGGCATGGCCCACTCCTTACA  
AGAGGACTATCACCTTGCCCCTGCCACCATCACCCGCAACCTCGCCATGCTCTCCAG  
CGTTTTACCACTGCTGCCAGGCGTTGGCGCTTCAAGATCGACAACCCCATCCGTGT  
CGCACTCAAGCCCTCAGTTAGCAACGAGCGAGAGCGAGTGGTCACGGACAAGGAAT  
GGGCCGCCGTCTGGCTTCTCTTGCCCCCATGCGCCCTGCCACCCGAGCCGCCATCG  
CTTTCTTGCGTTGGACCGGGGGCCGACGAGGCGAAGCGATCAAGCTTCGTTGGGAG  
AATTTGAGCTTTGACAAGAAATCTCCCGAGGCCACCTTCCGAGATACCAAGAATCCC  
AAGGGTGGAAGGCCGTCAACCGAACCATCTTCTTGACGCCCAGAGCTGCTTCCGTT  
TTGGACGTCCTGACGAAGGAGCTTCACGAAGCCAAGTTGCAGAGCGAGGGCCTCCC  
ACCTTGCCCCAAGACGCCTCCGATGCGCCCCAGCTCTGGTTACGTGTTACGCCTGGA  
CGAAGGCAAGACGTCGATAGCGGCGGACAGTGTACCCAAGCCTGGGGTCGGGCTT  
GCGAGGCTGCTCGGGTCAGCGGAGCCACGCTGCACGATCTTCGTCACACCCGGATT  
ACGGAGCTGGCAAACCTGCTGCCCATCCATCAAGTCATGAAGATCTCAGGTCATAA  
GACGCCGCAAATGCTGACGCGTTATTACAATCCCGACATGCAAGAACTGGGTGAGA  
TTTTCGAAGTAACCAGAGCTGCCGCCGAAAAAGCCCAGCGAGACTACGTCAACAAG  
ACCTCTAGGAAGACCGGTTGACTTCGTTCTTTTACATGCTATGAACTTAAACGAGCC  
CGGGTTTCATTCTTCCCGCTCACTAAGCCCCAGGCTTCCGGCGTTCTGACCTCCT  
CCCTCAGGAAGCTGGAAACCCATTCTTGGGGGCTTTTTCTTTTCCGCCTCTTGCGCTT  
TCCTAAAAATCCAATACCCCTGAAAGCATCCACATCTTTCTGGGAGGAAAGCCAATG  
AAACCCCGCAGCAAATATTTTCCCGCGTCAGCGGCCATCGCTTTAATGGCGGTGGCC  
GGTTGTTCAACTATCAAACCCACCCCTCTAATCCAACGCCACCCTCTCTGGGTTGG  
ACAACCCCAAAGCAACACGGCCCCGTTTACCGTCTCTTTCATCCCAAGCAAGAGCGA

GTCTGGAAAGGGGCTTCGCCCTCGTTGCGGGAAAAGGTAGAAGCCGTCCTGGCCCA  
ATTGGCAGCAGAGGGGTTTGAAGTGCGGCCGGTGGAGGGGTATCGAAGCCCAGAGC  
GCCAAGCGGTTTTGATGGCGTCGGCCAGCGGCGTCACGAGTGTTGGGGCTTGGTCCT  
CTTGTCACAACCTACGGCCTGGCGTTGGACGCAGCCGTTTTTGTCTGACGGGGAGCCCA  
GCTGGAACCTGGAAGATCCACACGTCATGGCCGGCTACTTGCGCTTCGGGGAGCTGT  
CAGAAATCGTGGGGTTGAACTGGGGCGGGCGATGGACCAGCCCCAAGGACTACCCG  
CACGTGGAACCTGAAGACCGAATGCGGGCAAGCAAAGTGGGCCTATCGCCAGGGCCG  
AAAGCCTCCCACCTTTCGAAGTGGCGGACGAGGGACCCTCTTCGTATCTGATTGCCCG  
AGCTCTGGCGCCGAGCTGGTGCCCTCCCGGCACGGATTGGGCGTGCGCGGCTTGGG  
GACTCGAAAAGCCTTTGGCATGGAATTGGACCACGCCTGCTCGGGTTTGTCTGGCAA  
CCTTTCCTAAAACTCAAAAAATATCAGCTGATCATCTTGCGCAAATGAAATCGCCT  
GCTATGGATTAAAGTATCAATCCATAACTCGGGAGGGTTTCCATGTCTTTATGCCGTC  
GTTCCATTTTAACCGCGGTGGTCAGCGCTGCTTTGTTTGCGTCTCCACTGCATGCGCA  
AACCGCCACTAACAGCACTGAAACCCCTACTTTCAGTCCAACGGTCTGTCCGACAG  
CTCCGATGCGGCGCAAGCCAACGGGGCCAGGGGACGTGGCGGTGGGTCCGAACGCTC  
GGGCAAACCTCCGCCGATTTGAGCGCTGCGACGGCCATTGGCTCGGAAGCTAGTGCC  
CAAGGCGGGGCTACCCTGGCTGTTGGCACGCAATCGTCGGCCGAAGGCACCTACTC  
TTCTGCCGTCGGCGCGCAAGCGCGGGCCACGCAAGGCGGACAAGCTTTTGGTGCGG  
GCTCCAAGGCCACAGGCTATGTCAGCGCGGCCGTAGGACAAGGCGCGCAAGCCACT  
GGAACCGCCCGGAACCGCAGTGGGCAACAACGCTCAGGCGCAACAAGACTACGCGA  
CGGCCTTGGGGTCGGCGACTGTCTGAGGCACGAACGCTACGGCGGTTGGCACGTTT  
GCGTCGGCGGAAGGCAACCTTTCTTCTGCCCTCGGCTACGGCGCAAAGGCGTCGCA  
GGTCCGATCGGTTGCGATGGGCTACGGGGCAGAGGCCAGCGCTCAAGGTTGTGTCTG  
CCCTGGGCTCTCTTAGCCGGTGCTTGGCCAGCGATGAAGTCAGCGTGGGCTCCACTT  
ATGAGGGCGGGAGCCAGAGCACCCGCCGGGTACCAATCTTCGAGCAGGGACGTCTG  
GACACGGATGCGGCAAACCTGGGCCAGGTGAGGACAGCGGTTCAATCCCTCGGCGG  
GGGCGCTACCTTCGTTAACGGCAACTTCGTGGCGCCGGTCTACCAGTTCCGCAGCGG  
TGCGACTACCAAACGGTTGGCTCAGCGCTCGATGATCTCGATGGGCGAGTCACTGC  
TATTGAACAAACCCCGGTAGCGGCTCTGGCACTCCCGGGCCACGCGGCGCAGACG  
GTCTGAGCGCTTACGAGGTCGCGTTGACCAACGGTTTCCAAGGCAACGAAAGCGAT  
TGGCTGGCGAGCCTGAAGGGCGAGTCCGGCGCGCAGGGGCCGGCCGGCAACGATG  
GCGTGGACGGAACCGCAGGCACCGGTTCCGGCTCGGTGGCCAAGGCGGGCAAAAAC  
GTTGAGATCACCAACACGCGGACAGCACCCAGACCGTTTCGGTCAGCGACAACGT  
GCAGCTGTCGGACACCGGATCGGTGAGCGTCGGCGCGACCAACGGTCAACGCCCAAG  
GCGTCTCTATTCAAGGGGGTCCCTCGGTACCACTGCGGGGGTCAATGCCGGCAATC  
AACGCGTGACCAACGTTCAAGCAGGCCGGGTCTGAGCGTGGCTCGACGGACGCGGTC  
AACGGCGGCCAACTCTGGGACGCGCAGCAAGCCTGGAACGACCGATGGACCGATAC  
CGACCGCCGCGTGCGTCACCAGGACCGTCGCATCAATGCGTTGGGAGCACAGCTCG  
GCGCAATGAGCCAAATGGCGACAGCTGCAGCGCAGAACGGCGGCACGGCGGTGGG  
CCAAGTCAACCTCAACATGGGCGTCGGCTTCTCTGGGGGCGAGGGCGGCAGTGAGCA

TTGGCTGGGGGGCCCGTATCTCCGAGCGCACACCAGCGTTTCTGCCGGCCTATCCTTCG  
GCTCCGGGAACAAGCCGGTGGCCGGCTTCGGGGTGAGCATCAACCTGGGACGCTAA  
ACGATTGCGTGGTGGAAAAAGGAGGTGATCGTATCTCGGCAAGGGCCCTTCGGGGC  
CCTTGTTCTGTGAGCCCCCTTGACGAACCCGGATTCTCTTCTATGGGTATGTAGGTATA  
CCCATTGATGGATGACCGTTGGCCTGGAAACGCAACCAGAAATACTCGCCCCGCAC  
CCGGCATCTCTACGGCCTGTTTTTCAACAACGGCTGTTGCTACGTCGGTCAAACCGT  
GGACTTGAGGCAAAGAGAGCAACAGCACCGGAGCACCCGCGGGGGCTGGCAAGGC  
AAGTCGTTACCTTTGCTCCACTTTCCAGCATGACTGGCACGCAAGCCGACGCGGAG  
CTGCACGAATACGCGTGGCGCTACAAGGCGTTTCAGAAGGGGTGGCGCATTTACGC  
CAAGCCGCCGGGCATCCTCATCCGCAACCCGCGACGTCGGACATCGTGGGCAATGA  
AGCGCCTTGCTGCGAGTTACACCTGGCCTGGCAACGCCCCCGGCCGCGCACCGTCGG  
CCGTCACGACCTCTGCGAGCGGTGTCCGCCTGCTCAAATCCGCACTCAAATGGCTCT  
TCCTCTGCCCAATGTTCTAATGCTCGTTGTGCTGGCGTCGCGCTCGACGCTTTAAGC  
ACCAAGGGGTGCGGGGCATCCCGGGTGCCAGATGGGGGGCGACCAGACAGCTCTAG  
GGACTTGCGGACTGATTTGGCGCGAAGTAGGATCTCAGGTAGGCGCCCGCCGAAGC  
TTTGACCGCTTGAAAAAGGCAGCAGTTGAGACATGTAGTTCCGCTTTTGATCTTCC  
TATCCTTGCCGGCATGCCGGCTGCTCGATAGGCGACAAAAGGTCCAGCGCACCGAG  
CAGTTACGAGAGCATACGGATGAAATCCTTTATTAGTTCTGCCGCTTTTGCGGCTTCC  
CAGACCATGTCTCACGCGGGCCACGCGATTAAGCGTTCCACCTCGTGAGGAGTGATC  
TCGGCCATGTTGGGCTACCGAAGCTTTGCCGCACTTTGCGTCGAAGAGGCGGACATG  
GCTCTAGACAATCACTTGCCGACGCGAGAGCTTTACGTGCTCAACATGCCGTTGGCC  
GAGGACCGTGCGAACAAGCTTGGTGTGCCGCACTCCCTGGATGCGTGTAAGGCCGC  
CGTCGTGTCAACTTTCCCGTTCCCGTCTATGACGGCATCGATGAGTTCTGGGATAG  
CCACGCACGCGAGCTGCTCGAAGGGGAAATCGCAGATGGCGAAAACACGGCCGCC  
GCCATGGCCGGTTGCAATGCAGCTTTCCCGACTCCCCGACCTTGAACCGCCAGAA  
GACACTGGCGATCTGTGGGCGAGCACTGATAGGTGGGCCATCGAGGCGACTGGCAC  
CATGAGTGGAGAGTATGACCCTGACGGTGACCGCATGTTCAACGGCCACACGTTGG  
AGGTCTGGGGTGAGCTCTCTACATAAAGGCGGGTCGATCCGGGCTGATTTTTGAAG  
AAAGCAAGGAGGACGCGAGCGTTAGACGACGACTGGCGTGATGACGATTCTGACGAT  
CTAGACGTGCAGTTCGCCGAGCGTATGGAAAGGGACGCCTGACCGTTTCACACCAG  
CTTGCCCGTGAAGGGCCAAGCTGGCTTTTCGAGTTGCACTGGCCATTGGGCTTGTA  
CGTCGTCAACGCACCATGCTCTGCTGGGAGTGTGCGCTCGAGTGCCCATGGTCTACA  
GGCAACGCCCCTGACGTCGCTTGGCGTCCTGCCAGATCCAATACCTCCAGCAAACG  
GTGCGCCTTGCGCTCGCTGTCAGTCATTGCACGGCGTGTTCCCTTGCCCTTCTTTGTGC  
TCGTGGAATAGCGCATCGAGCTTGCTTTGAAGACCCCGACCTGTGCCCCGGGACGC  
TGGGCTGGCGGAATGGCCGCCGGCCGCTCCTTGACGCCGGCGTCGAGCACGGTTGC  
CTTCAATCGCTCCAAGCCCAACCGGGTATTGAGCTGCTCCACGTCGTCGTAGGTCCC  
GTAGAGCTTGTAGGTCCCCTTCGTGAGCCGGGTAAAGGCTACCAGCGATGACGCGTT  
GTCCATCATCCCCAAGTTCATGAGATGGAACACCTCGCGCTTTCCCTGCCCCCTGGCT  
CTTGTGGACCGTCACCGCGTAATCGTGGAACAGCGCTTTGTGCTGGTGCGTGTTCCA

GACGACCTTACGCCC GTTCTCTTT CGAGTTTTCCGAGCGCAGGGTGCCACGATATC  
GTAACCGCCTGACCGCGAAGGCTTGATCGACTGAATGGTGGCTTGGGTGCCGTTGAC  
CACCCCCAGGTCCTTGTTCTTCGCCGTGAACATCACCCGATCCCCTTGCACCAGGGA  
TAGGTCAAATTTGCGACCGTTGTAGCGTCCTTCAACCGTCACCTCCTCCGCGCCAAT  
CTCACCGCGCTCCTTCAGCCCCCTTGCGTATCCCGGCATTGAGCGCGCTCACCTCGGC  
TCGGCTGTGGGCCAGCACCAGCTTGTCTGTCAGCTTCGCCGGATTCTTGAAGTAATC  
GGCCACCAGCCGCTCGATGCTCTTCTCCTGCGACTCGGCCTCTACGATGGAATTCAG  
CAGCATCGTTTTGAGCTCGTCGCCCTTCTCTAGAGTTTTCCCGACGGCTGCGCGTGCCT  
TTCTTCAGATCGATGATCTCGCGGTGCTCGTCTTTGGCGTAAAACGCCATCGCCAGC  
TCTCGGTCTTCCACCCTCGCCTGACGACGGATCTCGGTCAGCTTCACGTCGCCCCACT  
GCTTGCTTGGTGAGCTGGAAGCCTGAGCCGGCGCCGATGGGCTGCAGCTGCTCAGC  
GTCGCCTTGAGAAATGACTTTGGCATTGCTTTCTCAGCATGAATCAGTAAAGCCTG  
CGTGTCTCTGGTGTCCACCATTCCGGCCTCGTCAACGACCAGCACGTCGTTGGGCTG  
GAGTTCTCGCTTGCCCTCTGCAAGATCATGGAGCATCTGGGCCATGGAAACGCTTGG  
CATAACGCTCTCCGACTCGAGCTTTTGGGCGGCCTTGTTTCGACACGCACACCCCTAA  
GAGCACCATGCCTTCCGATTCTAGGGGCTTCCTTGTAAGAGCTCGGAGATCGTGGTCTT  
TCCCGTGCCTGCTAAGCCGCTCAAATTAGCCACACCTCCACTGTTGAGGCAGATGTG  
GTCCACGGCCACCCGCTGCTCTTGCGACAGTTGGAAGCCCTTGGCCTCTTCGTAAGTC  
CGCAAGGACACGCTTCACGGTCTCCGGGCTGGCGTGGTGCTGGGTCTCCTTCGCCCG  
GCGATTGGCGATGTCCACGACCGACCGCTCGGCTTCCAGCATCCAAGGAGCGCAGA  
AGCGATCTTCTCTGTGCTTGCGAGCGAGCGTGGCCCCCGGTCTTCTTCGGCAAGGC  
GCTCGGCATTGACCAGCACCAAGCCGTTGTCCGTTTTGAAGTTCTCAATGAGGGCTT  
CGAGCCCTTCCGCATCCACCTTACCGGCGTATTCCATCCCCAGCACCCGCACCAGAT  
CGATGTCGTTGAACACCGCTTCGTTCTGATGCAACAGTTCCAGCAGCTCTCCGTGCG  
TCTTGCTGCTCCACCGTGTCCAGATTGCCCTGAGCAAGCTTCAACGTCTCTGTGCTTAC  
GTTGAAGTCTTTAAGCGCCTCTTGCCAATGCTCCACCAGCTCCTGGTAGGTGGGCTC  
ATCCTTGTTGTTTTCGCGTGGCCTTGTTTCGCCTGCTGCTTGCTGACGCCATGCTGCTCC  
GCGTATTCGAGCAACGCCTTCCGGCGCTTGCTGAAGGCGTCGATCACCTCTTGGTCC  
ACGCCGGCCAGACGAACGAAGGTGCGGTTGGTCTCCCGGCCCTCATCGTCCAGTTCC  
CGGATGTGCTCAACCGGGTAACCCAGCGCCTGCAGGTTCTTGTAAGAGCTCCAGCTTG  
TAAACCTCATCTACCGAGCGTGCAATTCGCCAGATTTCACCGCATCAAAGGTGGAT  
TCCTTGCCGTCCTCGCCAAATGCCACCCCATACACCAAGTGATGGGTGTGCAGGTCC  
ATGTCTAAGTCACGTCCGGCGAAGTGTTGGTGGCTGGACCACACCAAGCCCTTCACG  
CCGATCACGTCTTCCCGCCCTTCCCTCGCCGCGTCTCCACTTGGGCTTCCAAGCGCC  
TCATGGCCAACGCCGTAGCCGCCTGGTGGGCTTGACAGGATGGCATCGCGTTCTTCCG  
GCGTGCCAGGGCGAAGGCAATTCCACGTCTTTGGGAGCGGAGATGGTGACGTCA  
TACCCACCCCTGTGACCACCAACCACCACCGTCTCAGGCTGGCCGCTGTCATCCGAA  
AGTGGATTGCCGTGCTTGTTCCACCTTCGATTTGACCTTGCCCTTCTGCCCCGGCATTCT  
GGCAAAGCGCCCTCCCCGTCAATGGGTCAAACCCTTCGGCCAGCTTCGTCATGCGCT  
CGCGCGTCACCGCCGAAGCCTGAAGGTTGAGGTGAGCCGCCATCTTGCCGCCCCAT

GCCATGGCCTCCTTCGCATGGCCATCCTTGTTGAGGTAATACTCGGTGGCCATCAGG  
TATTCGACCACGGCTGCGCCGGA CTTGCTGTCCTTGCCCTGCGCGGTTAATGGCGTC  
ACGTTGATCATAACGGCCTCCCTTTTACTGGTGTTCCTTCATGCATAGCAAAAAAGCA  
AGAATGGGCAATGGGAATCGGAGGGCGGGGATGATCTATTTCTTCATTGAGGACACC  
GACGAGCTGGTCAAGATTGGTCGAGCCAAAGACATCGAACGGCGCCGTCAAAATCT  
ACAGACCGGCAATCATCGCAAGCTGTTGCTGCTCGGCTGGATCCGCACCGACGACG  
ACGTCCGCGTGGAGAGGGAGATCCACGAACACTTGAAGGTTTCGGCGAGGTCGCGGC  
GAGTGGTTCGACCTTGAACCAGCCGACGTGCTTCCCCTCCTGTCCCGATTTGGCATC  
GATGGCTTCGTTGGAACCACTGACGATCCGTTTGACGTGACGGGCTACGATCGCGAT  
GGCGTGCCCGAATACATGGGCGTATGGAAGTGGGGCGATCTCGAGCATGAGGAATG  
CTGCCCATTTCTGCGGCTCCTTCTGCGGACTGCACTTCCAGGACGCGTCGAGCATGTA  
TCACTGCATCAACTGCGGCACTTTGACGTGCTTTGACTTTCTCCCACCAGAGGAAGA  
GGACGAAGAAGGCCCTGATGCCGGTCAATTTCTTGAAGATGGCTTCCAGCTCGTCGT  
TGCTGACGGCGCGCAGCTTCGGCGATGCAACGCCCCGCCCCCTCAGTTCGGCCGTGG  
CTTGGTCTGCGGTCACTTTGAGCACACGCTGGATGTCTGCAGCGCTCTCCGCATTGG  
GCTTGGGCATGGGCTTCTGCTCCACTGGCTGGGCCCCCTGCTTTGTCCACTTGGCCCCG  
CTTCTGCCCCCTCCCGCACTTTCGGATAGCTCACCCCCGGCCAGTCCAGCAGGAGCAA  
GTCTCCGGTCGTCTGAACGATGGCACGGATGCCCCAGCGCTCGGGGCCGTAGGCCTT  
GCCCTTGCGAAAGCCAAGATCGTCAGTGAGGCGTCCCGGGCCCCACGATGGCCTTGG  
ATTCCTCGTGAAATCGTGGCCTTCTCATCGTGGGTGCGCCACGCCACGGTGTGCTTGC  
CCAGGTTCTTGAAATCTTCTCCCGCGTCTCGCCACCTGTAGTTGGCAGATAATGT  
GTGTGCCAACCAACCCAGAAAAAGCTTGGGCAGTCTTGTGCGCGTAGACTTTTTCAA  
CCTGGCTCCAGTCCTGAACCGCCATGGCTGCAACCACGCCTTTGCTTCGGCCCAGGG  
CTAGCAGCGGCTCGATGTTGAGCTTGCCGGCAGAGGTCAACTCATCAAAGAAAAAG  
CCCATGAAGCGACCGGATTTCGTGCTCCGGCAGGCTTGGCCCGATGATCTCCGGCACC  
GTGACATTGATCATGGCGGAGATGTAAGTGCAGCGCCAGGACTTCATCCGGGGCCGGA  
TTGAACGATGACCTGTTTGCGCCCGGTGTAGTCGTGCGGGATCCAATCCAGCATGGA  
GAACATGCGATCTGGGTTGCGCTCCGGCCAGGCAAGCGCCAAGCGCTCGATGATCG  
CTGTTCCGTTTCGCGACACATGCCATCACACTGCTCGTCGTGCCGCTTTCGACGTTAG  
AAATCAAGACAGCGGCGCGGGGGTAAGCGATAGAGAGCGCGGCGTGCATGGTTATC  
GCGTCTCGTGCCAGTCGATCTGCCAGTTCGCTCCACCCCCATGCCTGTCCTCGCGTCG  
CCTGAAGCTCTCGGACGCGAGCCTTCAACGATTGCCTGAGCGGCAGACGCCCAGAAC  
GCTCCTGCCCCCTTCTTCGGCCGGAATGATGGTTTTCGCGCAAGGCAGCGGCTTGAGTA  
ACGGTTGCCACATCGCGGCCACATCCCAGATCCAGCTGCGCTTGTGCAAGGGGCA  
GACGATGGCCGGGCGAGCAAAGATCGACGTGAAGTCGCCCTTGATGTCGTAAATAA  
ATGCTTTCTTGTGCGAGCCGCACCACCTGCTCAAGCAGGTGCTTGAGGATGACGCTCT  
TGCCCGAGCCCACGCTTCCGTAAAGGAACATGTGGCGGGCCAACAGCTTCTTGAG  
ACCATCCAGTCGGGGTGCAGCGACAAGGCATGCACCTCGTCTTCCTGCTCTTTCTTG  
GTGAGCGAACGCCGGCGAGCTTCAGCCAGCGCTTCTTTGCCCTGGAGCAGTTGCGCC  
CCAGAAACATGCCAAGTGTTGGATCGGGGAATCAGGCCGCGACGCGTCACCCAGGC

AGCCGCCGAGCAAGCCACTCCAGCCGCGATGCCCACCCGGGCCAGGGTTCCGACCG  
TCGCCTGCTCGCGTGCCAGGTCCCACCAAGCTGCGGCTGGCTCACGCAGGGACATG  
GTGGCCGTGGCGGCGTTGACCAGCGCTGCGACGCTACCAGTGAGCGCCTGGCTGTA  
GGTCATAAAGGGAGTGGCTGCTGGTCACCTGCCAGCCAAGCCATAACGCGGCTGGGT  
AGGTCAGCGCCGCAACGAAGGCCCCAGACAGAAGTGCCTGGGGCCAGTAGCGCAC  
GTCCGTGCTTGGCGCGACGTGGCTCGGGACCTGCCAGGACCAGCAGTCATAGACCA  
ACGGTTTGTCTACAGCCTTTCTCCCTTACCCGGTGGAGGTCACCGGGCTTGCGCCCC  
TCGCGATCCAAGTCCCCGGGATCCGCGCCCCCGGCCATCAGCTCCAGGCATACGCGC  
GCCTGTTTCCACTGCGCGGCCAGGTGAAGCGGAGCCTGGCCGAAGTGGTTCACCAA  
CGCGGGATCGGCCTGGACTTCCAGAAGCCGGCGAACGATGGCGTGATTGCCCTCGC  
GCACGGCTTGGTGAAGCGGGCGGTGCGCCATGACGTCGGGTTGGTTGGGGTCAGCG  
CCCAGAAACACGGCTGCGTCCACCACCTCCGGCGCGTTCAACGAGATGCCTTCCTCC  
AGCCAACGCTGGGTGGGGACGTTGAGGGGCAAGTCGGTCTGAAACGACAGTGCGGA  
CGCTGCAATCTCTGCTTCGTGGAATCGGGCCAGCTGCGGGCCGTGGGCCTGAATGAG  
CCGTTGCTCCAAGTCCGCCGCTGTCCGGGCTCCACCCCGTAACGCTCCAGCACGTC  
TGCAGGAAAGCTGCGCACTGAGCGGGCCAGGCCAGCGCGACGTAGGTCTGGGCCA  
CCAAGTCCCCGGCTGCCATATCGAGCGTCCTCGTCCCGGAGGGCCCTTCAATCGCGG  
GATCGGCACCGTGCTCGAGCAAGCGCCGGACGATGGCGCCCTCACCTTGCCGTGCG  
GCCAAGTGGATGGGCATCAACCCACGGGCATTGGGGCAGTTCGGATCGGCGCCCAT  
GCCAAGCACGCGTCCACCGCGGCCAGGTTTCCCAGCGTGCGGTTTTTCGCAAAGCCA  
GGTCTGCCACGGCGCCCCGAACAGCCCAAAGTGCTGGCGGTGCTGAAAAGCAGCAG  
CCAGCACCTCGCTCCCGTGCATCGTGGTCAGCGCGCAGCCGTGGGTCTGGATGAGGT  
ATTGCTCGGTGACCTTGGCTTGGTCCTCTGGGACTTCGTAGCGCTGAAGCAGCCCGG  
CGATGTCCAGGGGTGGTAGAGATAACGAAGGGAGCTCAGGCTGGGGCCCTCATGGCC  
CGAAGCCGCTGAGCTGCGGTGCGGTGGCCTGAACCTGATTGATCGATTGCGGGAGC  
TCCGACAGCAGTTTGGCGCGTTGGTCGTCGAGTAGATTCTGTGAAGCATGGGCCAAT  
ACCGGGTGCTGTAAAGCTCTCCTGTTGAACGCCTGCTCGAGCGCTGCGGGATCGGTG  
ACGTGGATAAGTGCTACGGATGCACCTTTCCATAACTCCAAATCCATCCCCCGGAA  
CGGTTGTTGATCGAATGACCCAGTCGAAACCCGCCGGTGTTGAGGTATCCAAGCCT  
GCCACCTGGTTTTTCGCGGCAGAACTTTTCGGCCAAGGCGAGCGCCTGCCAAGCATCA  
GCGGTGGCGAGTGCTTCGTGGTGCTTGCCGTAGAACCGGGCCAGGGTCAGCGGGTG  
AAGGATGGGGTGGAGCAACGACTCATGGGGACGATTGAAAAAATCGCCCCCGCTCA  
GGTTTGCTTGATTGTTGATGTGGGGTTCCATCCCCATTGCATACCGTTTTTTTTTCAGTT  
TGGCAATCAGCTACAAATCTCGATCCTCTAGGCCATGCCGATTAGAAGTCCTGCCTG  
AAGGAAAAACAAAACGATGTGCATATCCATTTGCTCCAAGTTCTCCCGGAGCCAGG  
CCATCATGCAAGCCAACCTGCGACGTTGGCGACCACGTAGCTCACCACGGAAAATC  
CGCCCAGCGTGAGCAACAGATTTCCACGTTATCCACGGAATATTCGTAAGCATCAG  
CGAAAATATACAAAGGACCTCCCCCGGTTGTGTTTTGTGTAAACCCAGTCAAACACA  
AATGCACACATTGGCAAGCGCAAAAATGCGAAATTCCCGCCAGTTTTTCTGTTTAGT  
CAACTCGTTGGTTGTTGCTTGATGAGATGGGCTTTGATCAGCCGGGAGAGAGCGTCT

GCCAGGGAATAACCGTGTTTGC GCGCATACGCCTCCAGGGCTTCGCGGCACTCGGG  
CTCCACCCGTGCATTGAGCACTGCGGTTTCGTTTGGGCCTGGCAAATCGCTTGGGGTT  
GTTGTTGTTCAATTGTTTCAGCATGCGTCCGCTTTTCCCTTTGTCAAACCCCCCACCTTG  
CTGCTGCTTTGAGCCGCTTTTGACGTTGCTTTTATGGGTAGATCGGACCACTCATGAT  
TCGACGCTGCATACACAAAGGGCCCCGAAGAGCCCCTTGTGGGAAGCGTCCGTCTT  
CACTGACGGAAGACGTTGGGCTGGCGCTCGCGATCCTGCTGCTGCCAGTCGAATTCG  
TTCTCGTATTTGCGCATCTTTTCCTGCTCGGCCTTTGCGGTGGCAGCAAAGGTGGCAA  
ACCCGAACCTTGCCATGCCCCGTATTGGGGCACGTCAGCCTGCGTTCCCCCACCTTGCT  
CCTGCTCGGCCTTCTGACGGTTCTTCCGCCACTCGTCCACCCGCATCATCGGCGTCTC  
AACCGCTCCATCTACGTGATACGCCCAGGGTTTCCTAGACATCTCAAGGCCATGGAA  
AATAGTCGATTCGGAGGTGTCTATGAGCAGCAAGCGATATACGGATGAGTTCAAGA  
TCGAGGCGGTCCGGCAAGTACTGATCGTG

>CONTIG\_5\_length\_20523\_cov\_169.692587

CCACCGGACACAAGTCATGAAACTCGCAGACCTTAACATAGCAATTGTGCTGGGCC  
CTGTGCTTACTAACCAAGCGGTTAGCGAGAGCGTCTCCGGCCTCTGGGTAGCGTCC  
AAACCGCTCAAGCCGCTGCCGAGCGCGCAATTGTAGAAGCCTTGCGCGCCGCCGGC  
GTGGAGGTAGACGCATGAACGCCTATCCTCTCGAAGCTCAACTGTCGAGCCTCCCGC  
GTAACCAGCGCGTCTACGTGGTGCGCAACGGCCTGGTGTATCTGTACCCGGCATGCG  
TACTGCGCGACGTGGCTAACGACCGTTACACGATGCACGCCTCGCGCCCGTGGGAA  
GCCTCTGGCCGCGAATGGGATCACGGCCGGCGCATGTCGGACCGCCTGTCCGACGA  
GATGGACCTGTGGGATCACGCACGTCTCAAGGAGATGGCCCGCACGCTGTGGGTGA  
CTGCCGGCGCGCAGTCCACCGGCTTCGAGGTGTGGTGGTCATCGGTCAACGTGGAC  
GCACCGCCGGACTGGATCGGCGCCGCAGCGATGGTTCGCGGCGCGCGAGCTGATGCA  
CTTCCCGTTGTTCCGCCATCGTTACTTAGTTGACACACAGCAAACAGTCGCGTAACG  
TAGTCGCAAATCATACTGAGATCCGCCATGTCTAGCACTGCCGCTGCCGGCAATACC  
GCAACATCGCCCACCGACTACTACCAAGCCGCTAGAGACGTGGACGTTTAACGA  
GCTGTTCGGACGTGATCGGCTTGCAAGAGACGGCCGAGCTGCTGGGCACGAGCTACG  
GCAACGTGCGCATGCTGCGCCTGGCTAAGCGCCGCGTATCGGTTCGAGCGCATACAG  
GTGCTGCAGGAGCACGTGCGCGGCAACGAAACGCTGTACCGCAACGCGATGGTGAC  
GATGCGCAGCCTTGGCGCGTTTCGTCGTCGCAAATCCAACCCACAGGAAACAACCG  
CATGAAAATCGTATTGAACAGCATGGACGAAGTGATCGACTTCGTCCGCGGCCTGC  
ACCCAGCCTGCTCGCAATGGCAGGGCACGGCCCGACACCGGCAGCTGCGCCGCAG  
GAAGACTTCACGCCGCGAGTTACTGAGTATGCGGATGCACCAAAGGCGACCGTCAG  
AATGGTCGACTTTGGCGGCTTACAGCTGCCGGTTGTACCCGCAGCCGACGAACCCGA  
CGGCCTGCCACAAGACATCCAGTCGCCC GTCGGACCTACCGATACGGTAAGCACTG  
TGCAGGTCGACAACCCTGTGACGCGTCTGGCCGCCGCTGGGACGAGCGCATCGAT  
TCGAGCAGCAAAGAAGTCACGGGCAAGGGCCTGTGGCGCGCTCGGCGCAACGTGCC  
GGACGATGTGCGCGCCGCAGTGCTAGCCGAACTGAGTGCACAGCCCGACAGGCGT  
CGAGCGAGGACGCAGAGCCGCTGGTTACCGAGACGCACGCTTTGCCAGTCGAAGAG  
CCGGAAGCCGCGGTGGGCGCCGATACCGAAGTCGAGGATTACCCCGAAGCTTCGCA

ACCGCAGGTGTTTGTGCCCATTGATTCCGTAGACTACGCCGCGCTGATTGCCGCGAG  
CCAGGAAGCCGCGTTGGACGCCTCGGACAGCCACGCTTGGCTGGTGGAGGTGTGCA  
AAGGGTTTATCAGTGCCTACGGTCACGCGGCTTTCGCCGAAGTGCGCAAGCACGTCG  
CACCGAAGGATGATGCCAGCGGTAAGTCGATTACAGGAATTCACGCCGTCCGAGCGC  
CGCCTGCTGCAGGCGTGCATTGCTAACTACCTGCAGTTCGCGTAACATTACGTCATA  
CAGCGGCCTAGGCGCTCCGGCTTTCGGGCAACCTAGGAGGCGACCAGCAGGCGGTG  
TTGCCTCGCAAGAAATAACACCTGCAGTAGTTGCACCGGAGCCTTCGGGCGCACAC  
CCCGGGTGTGAACTACCGGACAAGGCCCAACTAGTGCCCGGACCGATAACCCTCCG  
GGAATAACCAACAGGCACCGTGATTACAGCACCCTCCTCTGTCGCGCTATTGAGTT  
AGCTCTACGGCTTGGGAAGAAAAGACCACCTTTGCAGGTGGTCTTTTCATTTCTGCG  
CTACGCCCAGCTACGCGCCAGCAAGAGAGTTCCCTAGGAGGCGGCGAGGCACCGGCA  
AGCACGCCAGGCATGCAGAAGTTCGAGATGGGCGCTACCGGCTTCGGGCCTTCTA  
TCCGCTTCGCTGATACAACAAACCCGCCTTTCGGCGGGTTTGTGTTTTCGCTCCTGCA  
AGTCGCTTAGATACGGCTAATTTCCATCCGCTCAAACATGAAGGTCACAACGCCAGC  
TTGCAAAATTTCGCTGAGCTGATGGGGCCTTGTACGACTGGATGCCGCCGTTAATCAA  
CTTGTAGCGCTTACCGGTAGACGGCAGCGTAACGGTGATGTTGACCTCGGGCGATTCT  
GCGATTTCGCTTGCGAATATTGATACGCATCCTCAAAACGGTCCAGGCCGTCGCTATC  
GGCCTGCAGGGTCAACGTGAAGCGAACGGGGTTGTGCACGTAGCCGCGCGACATCT  
TACCGTCGACGCCCATCACAACTCGACGTTCTCTACGGCATCGGTCTCGAAGACAT  
TGTCGCCCGCATATCCGGTCAGACGGACCGGCTGCGGTGCGACTGCTTCGATAGTCA  
TGGTGATCGCGGAGTTGGCGACCGTCAGTGTAGCTGCCATGGTGCGCCCTCCTTACA  
GGACAGTGGTAGAAACAACGGTGAGCTTCTGGATGCTGCCACCATCGCAGTACCAC  
AGATTCACTACGGGGGAGCCGCGGCCGGTACGCGTCGATGCATTGAGCGGCGGGGA  
TACCAGCAAGTACCAGCCGACCGTCGACACTTCGTTGTCGATGATCCGGCCGGCCTG  
CGTGTTGATCACCGCAGCTTGACTCGGCGACAGGGCCACACCGGTGCGGATCACAC  
CATTGGCCAGCGCCTGGCGGATCGTGGCCTGTGCGCCCTGGTAGATCGCAGCAAAC  
CCGTCCGAGTTGTACGGCAAGGTGTTGTAGGCCAACAGGGTCTCGAACAGCGACTG  
GCGCAGCGTGCGGCGCAACCAGATCTGGCCGAGGTAGGTGTCGGCCAGTTGAACT  
GGCCGCTGACCTTACCGTCGTACATGATCGTGTAGCTATTGCCGGCGCTCGCGTAAA  
GACCGTAGTAGGTGTAGTTGTTGGTCAGCAGCGCCTGCGCCTTGGCCAGCGTGTCGG  
CACTGATCGCCGGTGC GGCTGCGATCTGGCGGAACGCCAAGGTGTTGCGGCCTTCG  
GTCAGCAGGAAGTTGGTTGCAGCGCCCCAAGCGAGCACGCCTGCCGCAACGCCCCAG  
CCCGCCGTAGACCGGAATGGTGCCCTGGTAGCCGGCTGCGAAGACCTGCGCGCCGA  
AGCTCGACGCGTTGCTGGTCACGATGTCGGCCGCGTCCAAGCCCCACGGCGCGTAC  
AGGTATTCGAAGTTGCCTTCGCTGCTGTTCCAGGCCGCAAAGGCCAAACGATCGGCC  
AGGCTCGCCGCCACACGGTGGAGAAGATGCCCCAGTTACCCGAGAGCGAGCGCAC  
GCGGTTTCATGCCCCGACGCCGGGGTGTGAGCATCGACGCCTGCAGCCTGCAGGTACG  
CGCCCGAGGCACTGGACAGGCCGACGCCGTTGGCGAGCGTACCAGTCACCGCAGAC  
ACGACGGCGCTCGCGCCTGTGCGCCGTGGTGGTCAGCACGAAGCGATTGCGCTGCGT  
GTCGTAGGTGATGACGAAGTTCGGTGTGGTGAAGCCGGCCGTCAACTTCGCCGCTGC

GTCAGCGAACGAAGTCGCGGTCGACAGGTTGATGGCTGCCGAGGTGCGCTGCGTGT  
CTGTGGTCACGATCAGCGTGCCGGTCAATGCCTGCAGCTGCGACAGCGTCAGGGCC  
AGCGGCGCGCCGTAGACTGCCGCGCCGCCAGCGGCGTTTGCCTAGCGTGCGAAGTT  
GAGCGAGCTGGGGAGCTGCCCCGCCGCCAAGTACACCGGCCGAAGTAAACGGCCGCA  
GCCGCATACTCGTCCGAGGTGCTGCCGAAGAACGAGGCGACGTCTGCGGACGAGTA  
GAACGTCTGCAGCAGTCCGGGAGCGACGGCGGTCTGACTGCGTGAGCAGCATGCCGT  
CCAGAGAGGATTGCACACCACCGGCACTAACAACGCGCGGGCGGCACCTCGACGATT  
TGGGAAATTGGGATGCTATTCACGCGGTGTAGCTCCTAGGATGACCGTGCTATGGTA  
GCTGGTCGGCGACGATGAGGGAATCGAAAACGACATCGGTGAAGTACTCTTGACCG  
AACGTAACACGTTGGTTTACTTGGCCGAACAGTCGAAGCATGAAACGTTGCTCGAAC  
TGGCCTTCGCTGTTAACGATGTTACAGCTGCTGCGGTGCGTCGGCATAGAGCGGCGTC  
AGCGCACCGCTGACCATATTCTCGACGCCCCACATTGACCGCCAAGCCGTTGAGAG  
GATTGAGGCACGATCCGGTCCGAGCTGCCCCGTAGCAATCGACTTGGTAGCTGTAGGT  
GATGTGGCGCTCTTCGACCTGCGTCTCGAGCTGGCCGTCTGAGCGGCGCGTCCCGGT  
GTCTTGGTGCGGCTTGATCCCTGGCGAGATCACCACGTACGACCCTGTCGGCGCGGC  
GACTAGGTTCTGGAATCCCTTGACGATCTGATCGGTGTCGTCCGGCAGATCGAGCGC  
GGTCGCGATCCAGCCGAACAGTGCGTCGAACGTCTGGTCTTCGGTCGGGGTGATGGT  
CGCGGCAACCATTAGGGCGCTCCTGCGATCGGCACGGAGCCGTTCTTGAGTGCGGC  
GACCAGCGCGTCGACGGTCGCCGCGTTGAGCTGGCGCGTCACCGCGACGCAGCACC  
AGCCGCTCCACCACTCTAATACGTGCTGTATGGCCCACCACTGCGGCGCTTCAAGCG  
TGCCGAGGTTGACCAAGTCGCCGCCTTGGCCGTTTGGCCGGGCGATCGCCGAGAAG  
TTGCCATAGGCGTAGATGGTCGACATGCCGCCGGTGTAGCCCAACCCGTTGAGGTGG  
TAGAGCTGTTTCGTGCGTCGCGGCCTGCACCTGCAGGCGCGTCGCCGGCAGCACCGC  
GAACGTCGGCGTCTTGATGCCGCGCAGCGTCACGGAGCCCGTCGACACATAGACGG  
TGCCAGGGGTATCAGGGTTGACCGTCTGGATTGCGCCGCGAACCAAGTGCGTGATAT  
TAAGCGCCATCGAGCACCTCGCCATAGCTGCCGTCTTCCTGCACCACGGCCGAGTCG  
ATCGAGTTGGTCAGGTGGTTCGTCTGGATCAAGCCGTGGTTGAAACCCTTCACGGCC  
GCCAATCTTCGCTATTGTCGGCCGGCCAATCGCGGATCGTCTGTTGGATGTCCTCG  
CCCATGCGCAAGCCGATCGTGCGCATCGCAGTCAGCGGATCGGCGCCGTTCTTGAGC  
ATGGTCGTCAGGCCGCGTGCCAGCCGCGGCCGTTAGCCGCGAACGTCTGACTGCAT  
GAACGGGCGCGGGTGATTTTGGCCGTGGCCAAACTCTAGCGCCTGTGCGATCGCTGC  
AACCGGCATACCGCCGCGCGCATCGACGACCTGCTTGCCGGTGCGCTGATCGGTGTA  
GGTGTCTGCGGATAGGTGCGACCAAGCGAGCACGCCGGCCTTCACCGACGCGGGCT  
GGAACAGCTCGCGGGTGTTCTCGGGGATCTTGAGGCCCCGAGCGGTAGACCTTGCTC  
ATACGCCGTTTCGAGTCCCGCTGTTCTCGGAGAGGATTTGCTCGCCCGCCGAGTACA  
GCCGACGATTTCGGAAGTCGTGCGAGTAGCCGACACCCGAATGGCCGATCGCCACA  
TAGCGGAACGACCGGAACGGTGCAAGAAGCATCCAGGCCATCGCGCCGTACTGCGT  
TTGGTTCCACCACGCAGCGCCCGTGCTCATCGGCACGCCCATGTCAAACGAGGACG  
AGACCGAGCCCTCAGTCGCACTCGACAAGCGGCCACGACGCCGGACGGGCCGGAG  
TTACTAGACCCGACGATGCCGTTGCCGCGTAGCGTCAGCAGGTGTGCGACGATCAA

CGAGAAGATCGCCGAGCGTCGATCACCGTCTACGATGATCGACGCGTCGGTGTGTGTC  
AATGTAGCCGGTTGCCGCCGTGAACAGGATCTGTAGGCGCGCGTTCGGGACGTCCA  
CGAATTCGGGAAACGCCTCTTTAAACGCGACTGGATCGAATATCACGACGGCCATA  
GCGGCTCCTGATTACTTCTGTTCGGCGCGGGCGGCGTCTTCGATCTTGGCCGGCAAT  
TTCTCCGGGTCAAGTGCTTCGAAACCAGTCTTGGTCGGGCCGCGGTCTGCGCCTCC  
TTCACGGCGTCCTTGGCCTTGGTGGTCGCGAACACCGCACCCGACTTGAACCAGCGC  
GACTGGCTGTAGAACGGATGATTGACGACCCAATCCACGCCTCGGCCGGCACGCC  
GGACGTCAGGCCGTGCTCTTCGTACTCTTCCATCATCTTGAGGGCCCACTCGTCGTTG  
CTGCCCTTGATCATCAGCACGCCGCCGGAACGCCCGGAACGCCTTCGAAGCGCAG  
GCCAGCCGGGAGTCGACAAGCGACAGTCACGGTGCCGGCGGCATCGGAGGGCTGAT  
TACTGGAATTGCGAGGACGTGCCATGTGTGGGCCTAGAAGTTGAGGTTGCGGTGATC  
ATACACGGTTTGCGCGTTGTGCGCAGGTGTTGACAAGTCGTAACAGACGCGTTACTG  
TGGCCGCGCACACCCACCATAGAGCAGACATGCTAACTACCGATTGATACTTAAA  
GCCCCGGCAGCATTTTCGACAGACAACGCCTTCGCGTGCATCGCGGAAGCAGTCGACGG  
CCGCGTTTCGGGTCAATGACCTAACCGCTTACGTAGAGGATTGCGAAATACGCGCTAT  
GCAGCACATCTTAGGAAAGTGGGACCACACGTTAACGGTTCGACAGTACGCCACAT  
GGATACAGACCGGCGCCTGCCACGCGCTACTCCCTTAATTCCACACCACAGAGCAG  
ACAGCCATGAGTGACATTTACGACCAAGCCAGTGACCTCGAAGAAATGATGCGCGA  
CATTGCGCTGCGCACGGCGCGCTCGCCTCGCCCGGCCATCGCTGCCGACTGTGCACA  
TTGCGAGGAATATCCGGCAGCCACGACGCACACCGGCATGATGGCGCGCTATTGCG  
CGCGCTGTGCGAACGAGCTGGGACTGACGTTGTAATGCACTACTACAACGAGTACG  
ACCCAAAAGCCGCAGCGTGCGTGGCTGCGCGAACTGATAGCCGCCGGCGAGATTCGCGT  
GGCGATGTTGACACCCGCAGTATCGAGGACGTTAACCAAATGAGCTCACCGGATA  
CACTCAATGCCACTTCTTCGCCGGAATCGGTGGCTGGCCACTCGCGCTCCGACTGGC  
AGGAGTCCCTGAGTCAACCAGACTCTGGACTGGCAGCTGCCCTTGCCAACCTTTCAG  
CGCGGCAGGCAAAGGAACTGGGTTTGCTGACGAGCGGCACCTGTGGCCCCGATTCT  
TCTGGCTCATCGACCAGTGCCGACCTCCAATCGTCTTTGGCGAGCAAGTTGCAAGCC  
GCGACGGCCTGCAGTGGCTCGACCTTGATGCGCTGACTTGGAAGGTGCGGCCTACG  
CCGTTGGGGCGGCCGATCTGTGCGCTGCGGGCGTCGGTGCGCCGCACATCCGCCAG  
CGGCTCTACTGGGTGGCCCACTCCAACAGCAGCATTGGCCGACAAGGGAGTGAGAA  
CCTTCGAGGGCGGACTGCTGGAGGCGATGCGCAATCATGGGCCGGACTIONTGGCAGCG  
GCAGCGTGCTGGCGGGCTGGCCGACGCCAATGGCCGGGACGCCAGCACAGAAAG  
GCTACAACGCGGCAGGGAACAACGACAGCAGCCGCAAAACAGTGGACGTGTGCAA  
GGTGGATCAGCCGATCCGCTACACGGCTTCTGGGCAGGTGCTGACTGGCTCGGATGC  
CGGGATGGAAAGCTCCGGCCAGTTGAACCCGGATCACAGCCGTTGGTTGATGGGGT  
ACCCGCCCGCGTGGCAGCGCTGCGTGTTACGGCAATGCGATTGTGCCGGCCGTTGC  
GGCGACCTTCATTGAAGCTGTGATCTAAAGAAAAGGCCCGCGCAAGCGGGCCTTTTC  
TCGATCGGTGGTGTGAAAAGCTAAACTCCGATGATCGAACTTACCGCCCAAGGCAG  
GTAGATCACCGAGCCGTAAGTGCCGGCGCTGTGCTTCTGCCGCATCGTGGTGGAGTA  
CATCTCGATGCGGTGCGAGCGGTACTTCTCGCTGTAAGCCACTTCGCCGGTTCGGCTG

GCCGTTGACTTCCGGAGCCACAGCTGGACCAGACGACCGGTCGCGCTGTCGAACT  
CAGGAACCGCAACGAACTCGATCAGCGGGTAGGTCTGGCGAATCTTGCGGCCAGCC  
GACAGGCCGAAGCTGTTGGTGCGGTTGACGTCATTCAGTGCCGACGGAGCCAGCGC  
CATGACGAGGCGTTCCTGACCGGTGATCAGACCGCCTGACTGGGCGATCAGACGGC  
CGACCATGGCCACCACGTCGTTTTGCGATGTCTTCCGGCTCGGCGGTGCGCCAGTTGA  
CGGTGCGAGCAACCGGCGCGGGCAGCGTCGGATCGTTTCATTAGGCCGTAGTTAGGT  
ATGCCAGCCACGCCAACAAAGAACGAGCTGTTCTGGAACCTTCGCCATGACGGTCTGA  
CGAAGCGACTTCCAGGCGAGCCGCCAGTCGATACCCGCTTCGCCCATGATGGCCA  
GCTGACGCTCGCCCCACTCGGTCCACGTCTGGTAGATGTAGTTCTGCCGGCTCGGAA  
AGTTGACGTTTCGCATTCGACATGCCGTTTCGCCGACCAGTCGCTGTAGGTTCCGACTT  
GACCAACCGGCTCGGCGGTGATGAACACGGCGTACTGCGTGGTCCAGTCACCCTTCT  
TGACGACGGGCAGGATCTTCTCTGCGGCCATCGGGGCGAGCTGGATGTCGATCACG  
CGGCGATCGACGTACATGCTCATCCATGCAGGGATGCCGGCGCTTGCCGTGGTCTGC  
AGGGTTGGCGCAAGGCTGATGGCGTCGTTGCGGTATGCAGAGGCTTCCTGCGATACC  
GACTTGACGGTCTCAGGCAGCACGATACCGACGCGTGCTAGGTCGGCGATGGTTTG  
ACGTTTCGTTACGGTCATAGTTCCTTGGTTGGTGGCCGCTTACGCGCCGTTCTTGCCG  
ATCATCACGGTCTGACCTGCAACGGCCGTCTCGCTCAGAAGTTTGAAACCGGTGTCTG  
ATCGTGGTGCCCGACACGGCCGCGCCGATGTTGATGGTGCCCGCTGCCGGGTCCAG  
ATCACCGAAGCGCCACGCACCGGAGTGCCGGTCACAGCCGAGGCACGGGCGAAGA  
AATCACCGGTTCGCGAACAGCTCCACAGCCTGACCGGCCTGGATCTGCATCGAGTTTT  
CGCCGAGCCACGTGGTGATCAGGGCCGCGCCCATGTACCGGTGAATGAAGCCGATG  
CGGGTCGCAGCGCCAGCAGCGGACGCCGCGGCATAACCGGGGGGTGCTGTGACGGT  
GCCATCGCTGGCGATCAGGCCGAAGGTGCCGGCGTTGCAGATGTCAGCAGCTGCAA  
CCATGCGCTGGTTGAGGGTGCCGGAGACGACGAACTGGCGCGGATTGGTCGACGCG  
AAGTCGCCAGGTACGCCAATCGCCGGGTTGACAGAAACAGAGGTCTGGAAAGGCAT  
TGCAGTTGCTCCCGAATATTGGCCTTACTGGCCGAGATTGCGAATACGCTTGGTGTC  
GAACGGCTTGCGCGGCGGTGTTGCTGTCGTTGGCCAATACGGTGCGCTGCGGTTGACT  
CAGGCGTTGAATTGCCTGGTAGGTTGCCTGTTTCGGCACCGGCCGGGATGGACGCTAC  
GTCCACGCCGCGCTGCTTGAGCGCCGCACGGTAGATCTGACCGGCGTCGTCCATGGC  
AATCATGTCGCCCAAGTCGCCGCGGCAATTGCGCTTGGCGTCTTCGACGCTCTGCGC  
GCGCAGGCGCTCGGCCTTGACAGCGGCATCGACGACTGCCTGCACGGTCTTGCGCTC  
CATGGCCGGCTTGCTTTTCTCGTCCTTGTCGTCATCTTCGTCCGGATCTTCATCCGAC  
GCGGTGTTGACACTGGCCGGGACGCCCTCTTCGGCGACAGCGGCTGGAGTCTCTTCC  
TTGCCGCCCTTCGATCGCCGTGAGGCGGGTCTCGATGGTTTCGAGCTTGGAGGTCAGC  
AGCATGAGCGCCTGGGCGACATCTGCGGAACCGGTAGGTGCAACGGCTGGGGTTTC  
GTTTCGGGTCCACGTCAGTAGCTCCAGTTGGGGAATTGAGCGCGCTATCAGCGACATG  
CGCACCGGTGGCGCGCCCGTCTTCGACAAGCGCTACATGATTGCCTTCGATATTGGT  
CATGCGCCCGTGGTAGCGTCGGCCGTTGTACTCGCCTGGCGACATCTGCGGGGTGTA  
GCGGTAGGAGCTGGACAGGTTCGGCCAACCTCGCCGGATTGAATGTACTCGATCGCTTT  
CTTATCCCATAACCAGCAGGTCTGCGATCAGCTGATCGTTGGCGAAGCGCGCATTGCC

GACGCTGCCGCCGATGTACTCTTTGCGCGGCTCGTCGGCGGTTTGGGCGATGTGCCG  
AATCATCAACGGCAAGCCGTTGAACGACGCAGCTCCACGGGCGAGCTCTTCTGGGT  
CGCGGTAGAGGTCGTAGACCGTGTTGGCGTCCAGGGCGAGCTCTGCGCGCCGGGGG  
ATCTCTTTGCCGTAGTACGGGTTGACCTCGGCGACAGAAATGACGCAGTCGCGGACG  
CGCATCCGGCCGTCAGCGTCGAAGCTGCGAGCGGATTTCTTGTCGAAAGCGAATGTC  
GCGTTAGCCAATGTCATGCGCGCGATGTTAGCAGGGTTTCACGTTAGTGCAAGTTTG  
GTGTTGACAGTGACTAGAAGTTACGTTATGGTCACGCGACCTCAACCCGAAGGAAC  
AGACGATGGACAACGAAACCTTGGTGCAGACGATAGAAGCGCTAGAGGTAGCTGCA  
AACACGGTGCAGCGCTGCTACACGCACCGCCCCGAAATTTGCGGTATGCGCTGCA  
AGAGCTCGAAACGCAAGCCACAGCCGCGCGTGAACCTTGTCACTCAGTACCGCAAGC  
GCTACCCGCACATGGCCTGGAACGATCCGCCCCGAAAACCTGACAACGACCCATGC  
GAAGTGGTCCGCGTAGTTATTGACAGCCTTCACGCTGATGCAGCCTTTCTCTGCGGC  
GGGGTGTCCAACGGCAACTTTACGGCTGCGTATGTGGCCGAAATAGTACGCGAACG  
ACTGGACGCCGCGCGACTTGCCATACCCGACCTCAACGGTCGCAATCCGTTTACTTC  
CGCCTAAACGCGCCAGGAAATCCGGGAACTGGGATCAGATCATCTGGTCCTAGCTC  
CTCGTCCAAGCCGGGAATGATCGAGCGGCTGCCGCAACGGCAGTTGATGGGCTCGC  
CGGGCTTGACGAACCCGAACTGATCACCGAAGTCGATGCCGACCTGCGTGTCGAAA  
ATCCACTTCTCGCGGCTCGCCTTGAGATGGTTAACGCGCGGATCTTTGTCGACCGTG  
CTGTGCTTCCAGTAGGCGTAGCTAATCCCTAACTCGCGCTGACGCGCACTGTTTCATC  
TGCGCCGTGAGCTTATTGGATTGATCTCGCGCGATCAGCGCGGCGCGCTTGGTGGTC  
GTCTCGCCAGTAGCGCGCAGCTCGCTTGCGATCGATTGAGGTGCGGCCCGGCGAG  
AAAGCCGCGCGAGACGTGCGCCTCGATCTTGGTGAAGTACTGCTGCGGGATCGAGC  
GGATCAGCGCGACGTTGTCTGACCTTGACGTTGAGCACCGTGCGCTGCGACGCGG  
TCAGCTGCATCGGCACGTCAAAGCCTTCGCGCTTGACGTTACTTTGCCACGCCGCCT  
TGTTGCGCTTGTAGGCAACCTCTACCACGTCCAGCGCGAGCTTCTTCGCCATGTGCG  
CGAAGTGCTTCTCCAGCGTTTTCGCGCAAGCTGGTCAGCTGGTTGAACAGCGCACGGC  
TATCCTCAAAAGGCGAGGCGTCTGCGGCGCGCTCCGGATCGGGCGATCGTGCCCGCT  
GCCTGGTTTACCTCTAGCGCCTGGCGGTACTTGGCTTGCGTCCAATATTCGACGCTCT  
TGGCCATCGCGCGGATGGACGTCTGTAGGCGGCGACGGTATAGCTGTTACGCGGTC  
AGAGCCGGACCGATCACCGGGAGCTGTTTCGGTTTTCGCGCTCGGGCTGATCAGTTTG  
CGGCTCATCGGTGGGTTCCTGCGGCTGTGGGGTCAACGCTTCGGTCATCAGTTGCTT  
GGCGATGTCGTTGACCTCGTCCAGCTCGTCGCGGTCGGACAACGCGCCGGAATAGC  
CGCTGTTTCGGATCGCCAGCCAGTCGCTCCTGCACCATCTCGCCACTGATCACGCCA  
TCTCGACGTACTTGGCATCGGTGTCGGCATTCTTGCTGCGCACGTCTGCCAGCTCTAG  
GTCGGTCAACTCGTAGAGCGGATTCCACTCCCATGCTAGGCCGGGGTCGAGCTGACC  
GAACTCGGACAGCTGGACGATATCCAAGATCCACTCCATGAGTGGTCCGGTGTTGTG  
CGACTGGTAGCCGGCGACGTAGTCGTACCACACGCGGATCTCGCCGTCGCTGTTTGC  
GTTCAATCCGGCCGGCGTGATGCCGAGCAGCTTGACCAGCGGGATATGTGCTACGG  
CTGACATTTGTTTCTGCGACTGCGCCTGCAGCGCGTCCAGGCCGGACAGCGGTGTGT  
TGATCTGTGCGAAGTCTTCGGAGGTCATGTCGACCGCGCCGACGTTGCGGTTGTCGC

GGTTCAAGTTGAACAGCATCAGTCGATCCTGCAGCGACTGCACGCCACCCGGCGCC  
AGCAGCTGCGCCATGTCCATCTTCAGATAGGTGATCGAGAACTGCTTGACCGTGTCTG  
CTGACCGACTGGCGCGTGCGCAGCCAGTTGTCGACATAAGGCATGGCGAGCTGGGA  
GATCGACACACCGCGGAACGAATAGGCCGCTTGAGCATGTCGCCCACCGGCCGGC  
TGATCATGGTGTAGAGGCGCGAGGCGCTGACGGTCTTGAGACCATTGAGCCACTGC  
GACGGCTTATAGAAGTTCGGCTTCGTCGGGTTCGGTCGCGTTGTAGGCATTGGGCGTG  
ACCCACATCGGCTCCACGCACGCGAACGACTTAAGGCAGCCTTTGCGGATGAACGT  
TGGAGTCAGCAACAGCGGCGCGTCGGCGGCCACTTCGACGCCACCGTCGACCAAGT  
GCGGGAACACGTGCGCGCCGCGCTACGCCTGGTCGTGGATCACCGCGGTGCGGATG  
AGCGAGCGCACATTCAGGCGCTCGAGCTTCTGGGTGATCTGGGTGATCTTCTCGGCC  
GCGCCTTCTTCCTTCGAGGTGCTAACGACCTTGCCCCACGTGCGCACGACCTCGTCA  
GCCAGCGTCTCATGCATGGTCCGGTATTCGGGCAGCTGGGCCAGTAGCGCCAGGGT  
CTGGAACCCCGGCCAGCCGGTTGCCTCGACGAACGACAGCGCGTCGCGCGCATTGC  
GCCCCAAGCTGTAGTCCATCGCCATGACTTCGGTCGCTGCGGCTTTCTCTTGCGTACT  
GTACCGGTCTGAATCCACCGGCACGGCAGTCGCTAGGCTAAGCGAGGTCTGCTGTG  
CGCGCGCGGGATCGACGGCGCTCGCGAGCGAGGCTGCCGCGCGATAGGAGATCTGC  
GCGGGCGCCGCTTTAGCTGCGGGCTTGACGGGTGCGACGTGCTGCTTGGGTTTTGGG  
ATCGAGCGGCGCGTCATTGGTCAAGCTCCGGAACAGTAGGCGCGATGTTACACGAA  
TGCATGCCGGTCAGCGAGCGCTGGCCAAACGCAAGATCTCTTTAGTCACCAAGGAA  
CTGATCGGATCACGTAGGCAAAGATGCTGCAAGGCGATGACCATAACAATCAACACC  
GTCGTCTTACGGGTATCGGGAAAGCTGATGATCTCCGCCACGACCGGCTTGATCAT  
CGGTACATCGTCCGGGTGCGGGAGCATCACCATCCCGTTTTCCCATACCCACGACAC  
CGCATGGGCGCGCGACTCCTTGCTGCCTGTAGTAGGCACTCCGACCACCCCGGGAAT  
GGACTTTCCAGCTGATCAATCAACGCAGGCCCCGTTAGCTGCGTCTTCGATCAGGAT  
CTTAGTGACTCGCGGATAGGCGGCTTTCAGCCCCGCAATCGCTTGTGCGGTACGTGT  
AAAACCTTAGTTTCTCGCGCCGCATTCGAGTAGCCACACGCGGCCGTCCGCACTTTT  
ACCCCAAACCTCCCGCAGCAACGTAGTCGGACGACTTCTTATCCTTGAACGCTGCGTC  
CACCGACATCACGACCTGCACGAATTGCGTCGGCAGATCCTGCCGGCGATAGTAGC  
GCGTCCCTTCGGCGCCGAAGATCGCACCAAGCGAACCCAAACGGGGCCTGCTGGTAC  
ATTGCCGCCCACCATTGCGATCCCATATGCGCTTGAACCGCGCGCAGCTTTTCTTCTG  
ACTGCAGTTCGGGTACTAGCGGGCCTTCGGGTGGTTCGGGTGGTATCCAACCTTGGT  
CTTTAAAATTGAGGGCGACGAACTGCAGTCGTGCGTAATTTCGGATCGTCTTTGAATT  
TGTTATGCACGAAGGACAACAGGTCGTTTCGCCGACCACGGCGTACCGATTACGATCT  
GGCCAGACTTTTCCCTGCAACCGGGTGGTCACAACGGAATCGAACCAATTTTCTAGCT  
TCTCTTGGTTCCCAGGGCTAAGTGCTTCGACAGCGTCTTTTATTGCGTCGTCAATAAG  
CATCACGTCAATTGAGAAGCCGGTCATACCGCCTCCACGCCTGTAGCCAGCACCTC  
CCGCGTGGCACACTAAACCGGTCGGACGTGTTGATATCGCCCCGGAAGCCGATCA  
ACGAGGCCTCAGGAAAGACCGCTTTGTACAGCGGTTCAAGCATGATGTTCTTAGCAT  
CGCGCCCATTTGGCTTTAGCACGCGATAGCGCATAAGAGGCAAGCGCGATTTCGTGCG  
ATGCCCATCTCCGCCCCCAACCGGCCGATCAGGTAGGGCGGCAGGCAGCGACTAAT

CAGGGACGACTTACCATGCTGCGGGCGGGGCAGTCAACACCAAGACCGGCCGCTTAC  
CGGCGATCACGTCTTCGACGAACTTGTCACAGCTTCACAAGTGCGCCGGGAAAATT  
CCGAATGCTTAAAACGCGGTCGGTGGGTACAGTGACGAAGGCCGCGAAGTTGGTT  
CGCGCCCTTTCAATCAGCAGCTGAATTAGCTTGTCTGTATCTAGGCTGCCGTCCGCC  
ATCACAGCAGCCCTCGCTTAGCAAGGTCCTTGAGCTGTTCCACAAGCGCGTCTTTCT  
GCTCTTGGGGTAGGGACTCTGCATAACCGCCCGTTTGGCTGACCTCTAGCACGGCCT  
TGTCAAACCCCAGGATTTTGGTCAACTGGGCGAAGGCTTGGGTTTTACCCCTGAAAC  
GGGGGACGAGCTGCCCCTGCTTGAGCTCCCACTGTTGACATGCCGGCCGATGCGCG  
GCGTCTGGATCGCGTCCATGTTGAGGACGAATGACTCGGCCGCACCAACGCCGCCG  
CACTCCGGACAGGTCGACTCCTGGCCTTCGGTCGCATCACCGATCGTACCAACGCCT  
TTGCAGGCTGGGCACGCCACGAGCGCGACCTTGACGACCTTGGACAGATCCAAGTT  
GACCAAGTCGATCAGATCGGCGACGAGCGAGGCCTTGATCGGCTGCAAGTCAATGG  
CGGCTGGGATGGCGGACATGCGCCGAGTGTAGCGCACACGCAGCAATTGATGTATG  
CGGCCATATTAGTTTTCAGACGATACCATCTGTAAAATCAACCCAACAACCCTCCTAT  
AGCGCTAAAACAAGGAAATATAAAGAATACAAAATATTTTCTTGTTTTTGACTTCTC  
CTTGTACTTTTAGTTTTTACTTTTTAGCCTTGTAACCGAGTACTCACACAGATTTAAC  
AATTGAGAGTGTTGACAGAAGTAAAACGTTCCGCTACAGTCGATCCACATCCACAC  
GCAGGCCACATGATGACCACCTGGCTACGACACAAGATCCAATCGACCTGCCCG  
ATGGCGCCACGATTCGCCGACCAGACCTTCTGCGGCCGTTTCGTGCGGATGTCCAGCC  
GTAAACGTTGGGGCGCCTGCGCACTGTGCGCCGTGCTCCACAGATCAAAACGCATT  
TCAGTGGCGCATCGAGCGCAGTCGCGGCCGAAGGCGTCGAGGCACACAAGATCGCC  
GAATGCGCCATCATTGACGCGTTTTTCCCCGCACGACCAGCGGTCAACCGTTCCGATC  
GCACCGCCCGAAGGTTTGGACGATTTTCGATTACACCCCTGAAGGCGTGCGCAAGTG  
GGTCGCAACAGTCCATGAGCACGCGGCAACCTATGTCGGCAATGCGCGCGCGCTAT  
TCGACGACTGCACCGGCCCGACGACCGCACTGGTCGAGCACAAGATCGAAGCCACT  
CGGCACGGGGTCAAGATTTTTCGCCGTGGCCGACGTGATCCTTTGGAACGCCTCGGCC  
TCGCGCCTAGTGGTCGGCGACTACAAGTACGGCCGCAGTCCGGTTCGGCGTTGGCAC  
GGCCGACGAGCCGAACGAACAGTGCGCTGGCGCGATGTCCCTCCTGCCGCTGCGCG  
ACCTCGGTCCAGACGCATCGCCGAAGCAGCTGGGGCTGTTTCGTCTATCAGCCACGCG  
CACGCTACGGCGATGCGTGGAAGCCGCTGGCGCCGCTCGATACGCAGTGGCTCGCC  
GCGCAGTCGGCTAAGCTCGACGGCGAGCTGCGCGCTGTAGCAGACGCAGCCGCACA  
TATGGCCCGTGGTGAGCTCCCAGCCCCGACCCCTGGCGACCACTGCACTTACTGCCC  
TAGCGCGCGCTGGTGCCCTGCGGCGGGCCGGCTACGGTTCGACTGCACTGCAGGTCTG  
AGCAAGGAACTCGCACCGTGCAGGATCTAACGCCAGCCGAAGTGATGGCGCTATGG  
TCGTGCGGCTCGGCGTTCAAGCAGTTCGAAGAGGACCTGCGCGAGCGCGTCAAGAT  
CCTGCACGAGAAGTCCGACCCGTCGGTGCAGGTCCGTCGGCGCACCGGCAATCGGA  
TCTGGTCAAACCCAGCGGCGACGGTCGAGGCGCTGATGCTCGCCGATCGGCCCGAC  
CTACTGCAGCCGCCAGGCGTGGAGAAAGTCGCCGCGGTTCTGGACAAAGACACCGT  
CGAGAGCCTGCTGACGCGCGCACCGGACGTGCTGACCTACGTCGCTAGCGACGGCA  
AGCAACCTAGCCTAGCCGCGAGTGCATTTCGCTAAGTACCTGACCGAAGGGAGTAAA

TGATGGACATCAAACAGCAGGCACGGAATTTGCTAGCGGCGGAGTATCGCAAGCAA  
GGCAAAGAAACCTGGGCAAAAGGAATCGAGGAGCACGATCATTGCGAGTCCGATG  
AATGCGCATTGCGCGCTATCGCTGCCGCCCTGCAGACTGCAAAGTTAAACAAACGC  
GAAAAGGTTGCTAGCCGCATGATGGCGGCTTGGCGGATAGCTTCACCAGAATTTGC  
GCACACTCACCTAGCGGTTGATGCATTGTTAGACGCCGACGCTCTTTTGGATAGATT  
GGAGAAGACATCATGAGCCGCAGAGAATCTGCTATGAGCATTCTCGAACAGCAAGC  
CAGAGAGTTACTGTCCGAGCATTACGACGCGGCGGGCTACCGGCAACAGGCCGGAG  
CTCTGCGATTGGGCCTCATGTCTCAATTTGACCGCGCGACCGTAGCCGCAGTCGTAG  
AGGCCTTGGTTCAACGGATACCAGAGGGTTATGCGCTAGTGCCGATAGAATCTACCA  
GCGATATGGACTGGGCCGCTACGGACATCGAAGTTGGTTATGCAACTTGGGCCGGT  
AGTAGGGACTGCTGCACAACTGGTGAAGCAAGCGCCATTTGGTCTGCGATGCTTGCA  
GATCGGCCTAAAGGACAGCCCTAATGGCCCTACACCTCGACGAGATCGCACCTGGC  
GTGGTCGCTTACCTCGACACGCGCATCTTGCTGGCCGACAGCCGGCTGGTGCGCAGT  
GGCACGCAGTTCTTTCGACGCGGCCCATTCCTGTGCGGGATGGTCGGCGCTGGTCGC  
ACGTTATGGTGGGAGATGACCACCCATCCCGGCAAGTGGAATCAGCGCTTTTGGATT  
CGGCCGGAATGGTGCATCGGCGGCACGCAGCTATGGCGCGAGACGCCGAAGTTCCT  
CAACAACCCTGGCGAGCCGTTTCATCGGTGCGGACGTGGTCTTCGCCGACGCCTCGCA  
CAGCGAATTTAGCTTCATGCAGTATGACCGGCCGCGCATCGCAGACGAAGGCGTGG  
AGCTGGCGTTGATCAAAATGGCAACGCGAAATCAGTTGACATTTGTTCCGTAACCGT  
AATATAGTTGTTTCGCTCCACCAACCCGCGCAATGGCGCATTTAACTTCGAGAAATT  
TGAATATGGCACTACCGATCATGTTGCAATCATCCTCTCTGCCTCGTTGGACCAGC  
CTCGCGCCCGGCAAGGCCAACCCCAACAAGCCGGATTTCTACGTCCAAGCCGCGTTC  
GAACCGTCTGCAGGATCGTTCCTGTTGTCCGCCATGAACGAAGCCAGCCCCACCGGT  
AAGCTCAATGGTTTTCGTTACAACGTCAAGACTAACGGCGCGCAGGACAAGCCCTT  
CGCCGGCATCCCTGACGATTATCTGATCGTCCGCCTCGGCACCGGCCCGGACTTCCC  
GCCGGAGCTGTTACCCCAAACCGGGCAGCAGATCTCCGCTTTGCCGGTAAACCGCTC  
CCAGATCGCCAGCGAGTTCTTCGCCGGGCAGCGTGTGCGCGTCAACGGCTACGCGC  
GCTACTGGACGCATGACTCCGGCGCCAAGGGTGTGTCGTGGAGCCTAACGGCGTG  
ATGTCGGTCGGCGGCGGTGAACGTCGCCCCGGCGCAGCTGCTGGTGAGCCGAACGA  
GAGCGCGTTTCGCCAAGTACCGCGACAACGTTCCGGTCGAAGCCGCAGCACCTGCAG  
CCAGCGCTCAGGCGGCAAGTGCCTCTGCGGCCAGCGGCAACCCGTTCCAGCAGGCT  
GGCGGCGGCGCGTTCGGCTGATGCACGACCACACTCGGCCCCGAAAGGGCCGAGTTT  
CTTTCAGGAGCAGACACGATGCGCAAGAAAATCCACATACAGAAAGCCGCAATATC  
GGACCGTATTTTTGCCGGCTTTGTGAGTAAAGACGGCAAGAGCTGGTGTCTTGCTAA  
TCGAACCGATGTGACCGGCGAAGCCTGTGCAGCAGTCGCCAACACGCGCTCGCAG  
GTGGCGGCACGATTGAAGTCACAGCCAACGGAGTTGTTCGCATACGAGATAACCGTT  
CGAGCCGTGGAGTGACCGAAACTCGCACCCCTAACAATGCCGTGGCCTCCTAGCGTC  
AACCGTATCTGGCGGGCGTTTCGGAGGCCGCATCATTTTGTCCCTGTTGGCACGTAAC  
TACGCAAAGGCAGCGGCGAAGGCACTGCCGGTCGGCCACGTACAGCCGCCACTCAC  
GGGCCGGCTACTAGTGTGGCTCACGATGTGCCACCGACGAAAATGGCCAAAGGTC

ACGCATGGGACATCGCGAACCGTGAGAAGTGCTTGTGCGACGCCATGACAAAGCAA  
CGCGTCTGGCTCGACGACTCGCAGATCGACGCGATGGTCATCCTGCGCGGCGAGCC  
CTGCGACAACGGCCGGGTCGACGTGACGATCCACACCCTAGAACTTGGACGGCTCC  
CACTGTGAACGATGCTCTGGCCAACCTCTACGAAGCAATCGAGAAACACAAGCCAG  
CGCTACTAGGCACACTGCACCTAGGCACGCAGGGAAACGTCAGTCACAGTGCCTCG  
GTGCGTACGCTCGTCCGCTTGGCCCCGCGCTACCGGCGCCACGGCGCCACTGCACACC  
TTCGAGACGGCGATTTCGACCGGCGCTGGTCGACTACGTCGCGTCCCGGCCAAAAGG  
TGATCTGCGTCACGTCGATCCGACGGCGCAGTTCCTGATTGAGCATTTTCGACCAATT  
CACAGAAGTTCCCATCACAGCGAGTTTCGTTAATATTGTGCTAAGCTGGGTCCGACG  
TAACTATCGCGCCTGGCGCAAAGGCCAATGACGACCATGTCTACCGAAGCAGTCGC  
CGTAGCGCTGGGATTCCCGGCTGACATCGCTGTCGTTATTGAGCGGGCCTGCGCTAC  
GTACGGCGTGACCTCGACGCTCGAAAAGGCCCATCTACTAGCCCAGCTCGCGCACG  
AGTCCGGCAGCGGCAAGTGGCTGGAAGAGCTGGCGAGCGGCAAGGCGTACGAAGG  
CCGCGAGGATCTGGGCAACACGCAACCTGGCGACGGCGTGCGCTTCAAAGGCCGCG  
GCCTCATCCAATGCACTGGACGGGCCAACTACACCGCCTATAGCAAGTGGAAGTAT  
GGCGACCTGCGGTGCGTGACCAACCCCGAGATGTTGGCCAAGCTGCCCGATGCCGT  
CGATGCGGCGTTCTGGTACTGGACCGT

>CONTIG\_6\_length\_20380\_cov\_52.160124

CTTGAGCAAGGCCGCGATGGCGCAGGTGCTGCAGCGTTCGATCGGGCGTGGAGCGCA  
TCGAGGCCAGCGGTACCGGCTGGACCGTCGCAAACAACGACTGCGTGGTGGAAACG  
CGCGGCATGGCCGACAATAGCGTCGACCTGATCGTGACCTCTATCCCGTTTCGCCAAC  
CACTACGAATACAGCCCGAGCTACAACGACTTCGGGACACCCGACGACAACGCGCA  
CTTCTGGGCGCAGATGGATCACCTCAGCACGCAGCTGCTGCGGATCCTCAAGCCCGG  
CCGCATCGCCGCCATCCACGTCAAAGACCGGATCCAGTTCGGCGCGGTTGACCGGCG  
CCGGCGTGCCGACCGTCAGCCCGTTCCACGCCGAGGCGATCTTCCACTACCGCTCGC  
ACGGCTTCGACTACATGGGCCTGATCACGGTCGTGACCGACGTGGTGCGGGAGAAC  
AACCAGACCTATCGCCTGGGCTGGTCGGAGCAGTGCAAGGACGGCACGAAGATGGG  
CGTTGGATCGCCCGAATACATCGTGCTGCTGCACAAGCCGCAGACTGATCGCAGCC  
GCGGCTATGCCGACGAGCCGGTGCGTAAGCAAAAAGCGGATTACACGCGGGCGCGC  
TGGCAGGTTCGATGCGCATGCGTTCTGGCGATCAAGCGGGCCGCGGCAGCTGACCGC  
CGACGAGCTGGCGCAGCTGGGCCCCGACAAAGCTGGCAAAGCTGTTACCGAGTACT  
CGCTGCGCGAGGTCTACGACTTCGAGACCCACGTGCGCATCGGCGAGGAACTGGAG  
GCGCGCGGCGCGTTGCCGTCGACCTTCATGTGCTGCGCCTGGCAGCCACGACCCG  
GACGTGTGGCACGACGTCAACCGCATGCTGACGCTCAACGGCGAGCAGACACGGCG  
CGGCCTGGAAAACACATCTGCCCCGCTGCAGTTCGACATCGTCGACCGACTGATCCA  
ACGCTTCAGCAATGCCGGCGAGCTGGTGTTCGATCCGTTTCGGCGGGCTGTTACCGT  
GCCGTATCGGGCGCTGAAGCTGGGCCCGCCAGGGCCGCGCCGCCGAGCTGTCCACGT  
CCTATTTTCATGGACGGGGTGAAGTACTTGCAGGCCGCTGAGCGCGAGATGTCCATGC  
CGGATCTGTTTCGCAACGATGGAACCGCAGCCGCAGGACCAGGCCGCATGAAGCCCC

TGCTCTTCCCGCGCGAGCCGCGCCGGATGAAGCAGCCGGCCAAGGATCTGCTCCGG  
CAGCAGCTCGCCATGGCCGCCGACCACATCGAGCGGGTCACCGCTGAGAACCACGC  
ACTGCGCGCCATCTGCGCAGAAGCCATCAACACATGCCAGGGCCAGGCCGAACAGC  
TTCGCGCTGCGCTGGCGAAACAGGAGAACGTAAAATCATGAGCACACCCCCGACCA  
CCACCCAGCGGCTTCTCCGGCTGCGCGACGTGCTTGAGCGCGTCGGCATGTCCAAGT  
CCACCCTCTACAGCCGCATCCGGGACAAGACCTTCCCGCAGCCCCCTCCACCTGGGCA  
CATCGTCGGTCTGGGTTCGAGTCCGAGGTGCGCGACTGGATCAACCAGCAAATCGCC  
CAGCGGGACAAGGCCGCTTGAGCTGGGGGTATCTGTGGGGGCATCTGGCCGTGATG  
GGATAGGCCAACGCCTTTCACCTTCAACGCCTTACGGCGGATCGGCGGTAGAGCCCA  
CCTCCACCATTCTCACCTGCAAATCTAGCGTAAGTAGCTTGATTTTGCAAGGTTTTCT  
GGTGATTTACGACCCTCAAACGATACCCCTTCAAGGTATCGTTTGAGGTATCGTTTT  
GCCCAAACCCTTCTTGTTGAAGCGCGCCAGCGGGCTCTATGCCCGCTTCTGGTGCC  
TATCGACCTGCGTCCGCTACTTGGGTGCCGCTTCTTGGTGCGCGCCCTGCCCGGCCG  
AGGCGACGCCGCCCCGGCTGGTCGCAGCCCGCATGGCGGTGGCACTATCGGAGTCCT  
TCAAGGCGCTGCGGACAGGGACGATGGTGAACGACGACATCAAGGACATCTTGCGC  
CGGGTGCGCGAGAACGGGCATCAGGATTTGACCATCCAGCAAGTGCGCCTCCCCAA  
TGGACTGACGCTCGGCGGCGTGGAATCAACACGGCCGAGGACCGCCGGCTTTTCC  
GGCAGACTGTGCAAGATTTGAACGCCCTGGCGGCCAAAGACCCGCTCATGGCGGGC  
ATGCACGGCTGGGAGCCCCACAGCCCCCGCACCCGCCTAAGCCGCCTGCCGGGCC  
GCTGCTGTCCGAGCGCATTGACGTCTACCTCAGCGACATGCGGCGAGCCCAGCGGG  
CCGTGCGCAACGTGATGGACACCGAATACACGCTGCGCCTGTTTCGTCGCCCTGGGCG  
GCGACAAGCCGATTGAAGAGGTCACGGCCACGGACGTGCGGGCCTTTCTGGATGCC  
CTGGCGGTCTACCCGGCCAATGCGAGCAAGAAAGCCGTGTTTCGTGGCCTGACGCC  
CCTGGAAGTGGTGCAAAAGGCCAAGGGCGGCGGCCACCCACCCCTGCTGGAACGCA  
CCCAGGAAAAGCGCCGCGACCACTTGGCCGCGTTCTTCAATGCGCAAGCCGATGAA  
GCGCTCATCCCGAAAGCCCCGCACAAGGCCATCATGAACCGCTCCAAGTCCAAAAC  
CGATGCCCCAACCCGCGAACCCTTCACGGCCGCAGAGCTGGCCGCGCTGTTTCGATT  
CGAAGCCTTTCTGAGTGGGCCAGCAAATACCCGCACCGCTGGTTCGGCTCTATCCT  
GGGCGTGGCCACGGGCGCGCGCATCAATGAGTTGGCCAGCTTTACGTCGATGACG  
TGGCCGAGGTTGGGGGCCGTTGGGGCATCCACATTCGCGCCCAGCGACCGGACCAA  
CGGCTGAAGAACGCGCATTCTCGCGTTTCGTCCCCCTGTCGGACACCGTCCTGCAG  
GCGGGGTTCATGGCGTTCGTCGAGGACGTGAAGCGCGCCGGGTTTGAGCGCCTGTT  
CCGCACCTCCAGCACACAGAGGCCGCGGCTACGGCGACACCATGGGCGACCAAGTT  
CCGCGCCTACGCCATCAAGCGCGGCCTGACCGGCCGCCTGAAATCCTTCCATTGCTT  
CCGCCACAACATCGTGAGCAACCTGGTCAACGAGCGGGGCATTGCCATCCAGGTGG  
TGCAGGAAATCACGGGGCACGACCTGACCTTGCCCGGCGGCCTCAAGCACTACGTC  
AATCCGGGCACCATCCCGAAGCGCTTTGACGCGCTTAATCTCTACGGGCCGCTGTG  
GTTCTGCCGCCCTACGTTCCGGGCCAGTTTGACCTAGCCTTCAAACAGGTGCGTCAT  
ATTCAGAGACGGCGGGAAAAGCGAGCACAGAATCGTTGAACCGTGCACCCACGCC  
GGGCGTGAGAGCCAAACCTGTATTCCCTGGAACGCCCCCATGAAAAACCTTGCTGC

CCTTACGGTGCTCCTGACGGGCGTTACCGCTACAGCCGGCGCTGACAGCTTCACCGA  
GAACGAACTCAATCCGTCAGCTATCGTTCTAGACGGCAGTTATCGATACGAGCTGAC  
AGAGCTTTCGTGCGCGAAGGAAGAGCGCGTCCAAAACGCTTCTGACTCGGCCAGGC  
CGTCAGCTTTTGGGCGCTGGCTGAGCCAACATGTAATAAATACCCCCAAGACCAAGT  
CTTTTACTCGGTTTACGGGTTCTGCGTATGACGGCGGGGGCTGTTACGAACGCACGG  
CGAAAGGCATCCGGGTCTACCGCCCCGACACAGCGGCAGCCGAGCTAACCGCAACC  
GTCTTGCCCTTGCCGTGCCGAACCTCACGCAGTCCGGAACCTGCGCAGGACCTGAGGCT  
CTTCCCCCTATGACGCCGCACCGCTGGACTCCAAGCCCGATTTCTAGCGAAAAGCTC  
ATTGGGACGCTGATGAGTCAGCCTTATGCGCGCTCGGCAGAACATTTCTTTTTTGGAG  
AATCAACCTGCTGTTCTCTGGACAGCAAGCTGCAAGTTGGTCGCGCAGATGCAGATG  
TCAGAGATGGATGGTGCGGATTTCCCATTTCTTTCGATGGCAGGCCTCCCAGCAAGGC  
AGTCTTCTTACGGTCCAACGCTCCGATGGCACTTATAGCCAAGGATGCTATGAGCGA  
GTCACCGAAGGCATACGCGTCCATTCCTTCGGCAGTGCAGAACCCCTACGTCATGCGC  
TGGAAGTAGCTACCGGTGAAAGATGGCAGTGGAGCGTGATGCTTTGGTGCTACGAG  
CGCCCGATATGCTTTGCAGTAACAGAAAAGCACTCATGCGTTTGCCTTCTCAGAGCC  
TAAAGCTTTGCTAAAGCTCCCCTGCTTTTGCCCTTCGGCTCTCGGGTCCCCTCCGGGG  
CCCCTCCAGCCGAAGGGCAAAGTCTCCCCTTACCCGCTGACTAAAAAAGCGGTGGG  
GTGACTTGGCCCGTGCGTTAGTCCCGTGACGGCGACCCCCAGCACTCAGGGCGTGGT  
GATTCTCTGCTCTGCACCACTACGACAGGTTACGCGAGCAACCGCGCCGGGTCCGG  
GTCCTGTCACCAAGGTTCTCTTGCGTCTCTCCGGTGTTGCTTTACTTTTCCCGTGCC  
CAGGCGCGTTTTTCTGCGGCTTCTCCTAGCAACAAACCATTGGTAACGGGACCGCG  
AATGGGAGACGCTGCTGGGGCCAGATTGAGCACTCCCCAGTTACCATCGACATCTG  
CGTTACCTGGCTGGCGCGAGTTTACCCCCCTCGCTTTACTGCCTGCGCACCCGGTG  
ACGGTCAGTCCAAGCCCGCAATGGGCTCCCGGAAACCGTGCGCACCCCAACTCAAT  
GGGTCGTGCTGATACGGCTACCAACGGCCTTCGGGGCTGGGCAGATTCCGGGGCGAG  
GAAAGGGAGGGGGCTTGCGGGTCAGTCCAGGCTTGTTAGAGTGGCCTCAAGGGGCA  
CCGCTGGGCATGTCGTAGCTGTCACTACCTTGCTCGCCTCCGAGTCGGTCAAATC  
GGGGGCCGTGAATCCAAACTAAGACGCCCTCGGCTTTTGTCAAGCCGGGGGCGTTTT  
CGGCTTGAAGGCAGATTAGGAAGCACGACCATCCACCAGGAGCGCGTTGAAGGCT  
TCGCCTATTGCCTTCTCTGTCTCCTGGATTTGCTCCAGAGCAGCTTGGATGTGGTTAT  
GGAGCTCCTTCTCATCCCCCCCCGTCAGGAACGTCTGAAGCGATTTTCCAGGCGCTGT  
GGAGGCGGCTCGTCTGAGAGAGCGCCAACGCCAAGCGGTTTGCGGTCTTCTCGCCA  
AATAGGTCTGCTTTTTTCGAGGAACGTGAGAGGAAGTTCTACTTTGACTTCATAGGCT  
TTGCCTGCAAAAACCTCGCCTGAGCGCCTGGCTGTCAATCAGATTCAGGAGAGTCGTT  
GTATCGCCGTTTGATGGAACGACTGACGCTCGGAAGCGCGCGATGTCTATCTGTGCT  
GCTCCGACCGGCGCCGTCATTATCTGGGCCAGCAAGCGACGGGTGGCGGCCCGCTC  
CCTCGCCCTTCGAAGGCCGTCCGCTACCCAAATGCCAAGTGCGATAAGGGCAGCAA  
TGGCTGTCCAGTCCAAGCCGGAGTCTTTACAGAGCCACATGAAATCCCATCCTTAGG  
TCGGCGCTTTTATAGCAAAGTAAGCTGGTCATCTGACTCGAGCGGCGTAATGTCAGA  
AATGATGATGGTCGGCCTTCGCTCTGCGACGTGAGATTGTTTGTAGAGACGCGAAAC

GGTCCCCTCAACAACGCAGTGCAGAAAAAGCGCGGGCTTGTATTTCTTGATGCTCCC  
GATATCGGGGACGCAGTTCAATACATGCCCGTGATACTCGAGGCCCAAAGAGTTAG  
CGTTTTTCATTGCCTCGAGTGAGCTTCCCCTCCAACCTAACCGTATCTCCATGCTCTAG  
CTCTGGGAAAAGGAACTCGCCATCATCATTGGCTGCGGGTTGGTGGCCAAAAAAG  
ACTTCTCTTCCACGGTAATCGTAGTCGCTTCGAAGTGGCTACCGTCTTCACTTCTGAC  
GCCGACCTCCAGAGAACGCCCCCTCCCGGACGGTTGCTGAAATTCGCTTCAGCATGTT  
TGGCGGGATTTCATATACCACTTAAGGTATTCCATCGGAATGTAGATGATTTCCGCC  
GGATTCGTTTTCAATCCCGACAACCCCCGCCCTGCCGCCAGTGGAGGTCACCTGGT  
CCATTCACGATTCCCCCTTGGTGTGTTTGAGCACATCAATGAGCTTCTTAAGCGCATCT  
ACCGACTTTCGCACCACGTCCGATAGACCGATATCTTTGAAATCCTTTTCCGCCATCT  
TCTCGGCGGCCTTCTTCACGTAGGCCGTGCGGCCGATTGTAGCTATCCCGGTAACCA  
CCAGCATTCCGTGTTCTTGAACCCAGACGACCCACGAACCCTCCGAGGTCTTTACCG  
GGATTTCAATAATCGATGGTGGCCAGGCCGGGGGCCTGCCTCCTGCAGAAGTATTTTA  
TGCAGTCATCAAGCCCCAGCAGGACATTTCCCGCAGCAGAGGCTGAAATGACCCCA  
GTGGGCACCGCCTCGCCATACAGTTTTAAATAACCAATCCCTGAATTTTCAGCATCA  
ACCACGATGAAGCCCCCTGTAGAAGTGGCAAAGCCAACACGTCCCTGAGCTCCGAT  
AGTGGTCGGAGTGATTCATGGACGTCAACTACAGGGGGTGGGTCCCTGCCAGAGGC  
CAGAGCTCAGCCTGCGACGATGCTAAGCATCATGAAGAACAGCGTCGGCACCAAGG  
CCACCAGCCCGATGAGCCCGAAGACCCCGCAAATGGTGATAGCCAGAGCTGGCCC  
GCATTGAAGTGCCCGGCGCTGCGCTGAGCAGCGGCGTAGGCCGCTGTGGGATGGAG  
ACGCTCCGCGCGCCCGCGAAAACGCGGGACAGCACCGGCCCGATGATGAGCCCAA  
ACGGCCCCGGTCAACAGGACAGCGATGCAAAAGCACAGAGTGAGACGGGCTTGCGG  
GGTCATCACTGAGACAGTCGGGACAGGCTGGTAGCTCATCGGTCGTTCCATTGGCTG  
GCAGCGGGATGCTACCTTTCAGGTAGAACTACCTCAAAGGGAGCCCCGCCGTCAT  
GCTGTGGTCTGTTCGCCGTTTCGGTCTTGCCCGTGCCCAAGGTCCCACCCACCCCC  
GCGCCCTGTTTGCCGCTCGGCTGAAGCAAGCCCGTGCGTTGCGCGATGTGCCAGCC  
AGCGGGCGCTGGGGCTCAAGATGGGGCTTGAAAAACACGTGGCGGCCAATCGGGTC  
AACCGTTACGAGAGCCAGGCCAGGGGCATCGACTTGATGGGCTGGGCAAGTTGGC  
CGAGGTGCTGCAGGTCCCCATGGCCTACCTGGTCGCCGAGGACGAAGCCACAGCGG  
ACGCGGTGCTGGCGCTTGCTCAGCTGTCTCCGGAACAACGCGCCAAGGCGGTTGCG  
GCCCTCCTCAAGGCCGCGGGGACGGACGGCGGGGCGGACTGACCGACTCCGGTGGC  
CGCAAGGCCTGCTCCGGGGTCTGCGGCACCGGGGCCATGTCCCGCGTCGGCGCGAG  
CTCGGCAGTGGGTTTGACGGGCGGGAAGTGCTTGGGGAAGTGCACCAGGAAGTCCG  
CCGTGGCCAGCTCGAACGCCACCGAGGCTTTTTCTTTCGCCTCCCTGGTTTGATTGCG  
GACCTTGCGGGCTTGCTGCTCTTGACGCTTGGCTTGCTGATTCTGTTCTTGCGCAGCC  
CGGGCGGCCTTGCTCTTCGGCGGTAGGCCGTCCCACCTTACGCAGCGCCGTGGAAAG  
GAAATCCGTGGGCACCGGGAACATGTTGGCGTCCGCTTCGGCTCTGCTTCGTTTCAA  
CCCCGCCTGGTGCCGTTCTCTTTCGCTTGCGAGTAAGCCGTGCGTTGCTCGGCCAG  
GTCCGTATGACACCTGAGGAGCGTGCGGGAAACCGAACGTTGCTCGGGCGTGGCGC  
TGCTGGACTGAAGAAGGGACCGGCGTGCCACCTTGAACATCTGTTCAATCATTTCTT

CTACATTCTTCGCCGCCTGGTCTCCGGCCATGATTTCCGCCTGTCTGTTCTGTGTGTG  
TTTGCGTGAAGCGCGCTCAATCGCCGCTGCCCCCTTGCCCTGCTGACCAGCCGCGCC  
AGCGGCCGGCCGGGGCATGGATGACCCGGCTTTGTGCGCAGCGGGACGCTGTGCAC  
GCGCCTGGACGGCGGGCCCCTGGTTTTTGCAGTTACGGCGTGGACTGGAAGCTGGAGC  
ACCGCAATACCGGCGCGCTGATATCGCGGTTTCATCGCTGCGCAATACACGACCAAA  
TCCGCCGGCTTCGGGCGCTCGTCGTCCCCCGTGGCCAAGCCAGGGTTAAGACGGTT  
GACTGGGCGCAGCGCAGGCACGCGCTCGAGGCCAGCTCCTGGGTTTCGGACTCGAC  
AAGCATCAATGTTATTTTCGCGTGAGAGCGGGGGCGCGGGGTTCGACGCTTGCGGCCG  
GGCTGGCGGCTGGGGCTGATGGGGTCATGGCGTGGGGCCTCAGTGGGGGATGGCTG  
GGCAGCTGCGCGCAAGCGCGCCGACGATTCTTTGCGACGTTCCAAAAGCGCTTGCG  
CGTGCAGCGCCTGCTCATCCACGTGAGCCAAACGGCCCTCCGCAGCGGCCTGGGCCT  
TGAGTGCTTCGAAGCGTTCGGTGTGGGCGGTACGCGGCTGGCCGACGCGTCGCGC  
ACGCGGTTCGTTGCGCTCGGCTTTCTGCAAGCGCTTCCCGCGCCGGCGCGCCTGGGTA  
ACTTCTTTGCCCTCGTGACGGGTCGCAGGGCGGTCCAACGCAACCGCTGCCTTGAAA  
TCGCCCTTTTCCACAGCCGCCATCTTTTGCTTGTGCAAACCTGCGGTGGTCCACGCGCG  
CGTCCACGCCCGCCGCGGCAAGCGCCTTGTTTCATGCGCTCACCGATGGCGGCTCGAA  
TGGCTTTTAGTTTCATTAGCGCCCGCAACGTATTCGTCCAGCACCCGCGCCGCGCTGT  
CACCGAACCCATCGGGCGCCAACGACGCGGGGAGTCAGGAGAATGTGGGCGTGGTAG  
TTGCGGCCATCGCCCCCTTTGTCAGGCGCGTGCAACGCCACTTGGGCTGCCACGTTG  
TAGCGGTCCACCAGCAGTTGGCCGACGTCGCGCGCTAGGTCGCGCCGCTGCTCGGG  
GGCCAGTTCGTGCGGCAAGGCAATCAACACCTCGCGCGCGACCCGGGCGTTTTTCCG  
GGTTTCATGCTCCTCCACCTTGGCCCAGACCTGGTGCGGGTCCAGCGCCACGCTGG  
TGAGTCGGTAGGCGCCAGCATGTCCACGGACAGCACACCGGTTTTTGCGGCTGTAGTT  
GTGGCGCGTGCCGCTGGGGTTCGTCCAAGTCCAGCCCAGCACGGTAGGCCGCCGCCG  
CTGTGCGGGAGTCGCCCTTGCCCCGTGAAAGGCTTTTGACTTGAACGCTATAAATCG  
CCACGACCCAACAATCTCCAATACACCGCAGCCCCCTGGGGGGGCGAGGACTGGGG  
GGAGAGGCGTCACGCGGAGCGTGGCGTTCGGGTGTCGGGGCGAAGCCCTGACCGCA  
CGGTTTTGCGAAGCAAAAACCATAAGTGCGCTATTGCTGTTCTTTCGGGGCGCTTCGC  
ACCCCATCGAACTGCCATAGAACCGGGGCTGCTCGCTGCGCTCGCTGGCCCCCTAAA  
TCAGAGTTACATGCACAACGGAAGTGTCAACTTTTTAGCCAAACGATGCCAAAAAA  
CAAAAACGGCGCTCGCTGCTCGCTCGCGCCAGAAAATGGGCGTTGCCCCCTTGCTT  
CGGCCTATTTTCTGGTTGCATAGATTATCTAAGGCTGTTGTGGGCGTGTCTGGCAA  
ATGTTGAGAAGCAAAAACATAAACTGGACCGGATGTTGAGGGCGCTGGCGCGCGAG  
CAAGCAAAGTTGTTGTTGGCGGAACGCGAGGTGCAGCGCAAGCAGCGACGTGCCGA  
ACTCAAAGAACGCGAAGAGGCACGACGCCAGGATGCGCACCGCAAGATTGGTTTGG  
GCGGGCTTGTCATTGCCGCCGACGCCGATGGGTGGAATGAGGCGGAGATTGTGGGC  
GCCTTATTGGCCATCACTGACCGCTTTGCCTCGCACCCCGATTTCCGGGAACAAGTA  
AAGGAGCGAGGCATTCGCCATCTGGAAGCACGCGAAGCCGCGCGTAAGGCGGGCC  
GGTCATGAGCGAGCACAAGAAAACCCACGGACCCGCTGCTTGAAAAACAGATGGAA  
GGCTTGCGCGCCCACTTCCTTGGCTCGCTGAGCGACCTGCTGGACGCCCGCCGCAAA

CGTAAGGCGGAATGCCCCGACGCCCCCGCCAAGTGCGCCACGCGGCCCCGCAACCGGG  
CGGCTATACGCTGGTTGAGGTGCTGTTGGTGCTGGGCGTGTCTTCAGCGATGGCGGC  
CGCCGGATGGCTGCTGTTTGGTCCGACGAGCGTGGCAGCTGAGGTAAAGCAGACGC  
AGTTGGATTTTCAGCGAAACGGCCACCGCGATTGACCGTTCATTAGGCATCGTGGGGC  
GCTACTCGGGCTTGTCCACGTCGCTCGTGCAAACCGATGGCCTGGCCGCGCAGCGGC  
TGAGGCAGAGCGATGGCCTCCGCAATGCCTGGGGCGGGCGCTGTATCGTTCTGGCCG  
AACACGGTAAAGCGCGGCAACGACTCGTTTTTAGTCGAAACCCGCGACGTGCCCAA  
AGCTGCCTGCGCAAACTGATTGCAGCGATGGCTGGCGACCCGGCAGTGTGGGATG  
CACAGGTCAATGGCGAGAGTGTCTATTTGAACAGCAAATATGACCCGGCCAACGCC  
GCCGTTGCGTGCGAGCAGCACGGCGGGGACCGCATGGGGTTCGTGTATTTCTCGGGC  
TTGGCGTCGGGTTTCGTCCGTTGCTGCTTTGCCGCCGAATCTGCCGCCGGCTCCGCCGT  
CGCTGACCCCAACCAACCCAACACGCCAGTGGGGGCGGTTCGATGGCGCCCCGAC  
GTGGACGATGCCACGCCGGGACACCTGGCGTGGTGCCGGCTGGGCCGCCGGCAAC  
ACAGCCGCCGGCCGTTTCTACGGCCCCACCAGCGCCAGCGACACCGACGGCTCCTC  
AGCCGACGCCAACGGTTTTGCCCCCGGCACGCCTCCGGGATTGACGGTCTGCACCG  
TGCCGCCGACGCGAGACGCAAAACGTGAACTGCCCCGCAGGACAGATTGGGACTGTG  
ACGCAGCAACGCGTGGGCTACTGCGGCGAGGTGGGGGGTGGCTACGAAGCCTGGGC  
CACAGCAATCTATGGCCCCTGGACGACGGTCAACAGCACCTGCGCGCCGGCGTGCG  
TGGCCCCCTCGCCACGTCGGTGGCCATCTCCCGCGTTGCGCCGGCCGAAAGCCAGA  
ACGTGGGCTGCCCGGCTGGCCAGGTGGGCGAGCACTGGCAACAGCGCAACCGCGTC  
GAGAATGGCACTCGCACACGTCCTGGACGTGCCCCGCCGCCACCGGGTCCCCCGT  
GTCGAGCACGTCGGAGAGCTGGAGCGGCACTTACTCCGCCACAAGCGGCTGGGTCA  
CCACGTCCAACACCTGCGCGCAATCCGGCTACCCGTCAGAACGCTACATCGAAGGC  
TGTTTTGCTAACTCGGACGGCGATTTCGGTCCGATGCCAATACCCATCGGGCCCCGGT  
TGGACGGTTCAAGCAGGCGGACCTAACTCGAAGGGTTACACCTGGACGGCTGTTTCG  
CTCTCAAGCGCTATGTGCCAGCGGCAAGTCACGATGGATTTTCATCGGCGGTGGCCC  
GGGTGACGCGGCGTGGGAAGAGTGCTTTTAAAGACTTCCCACCCGCTCACTCTTTCC  
GTTGACGATATGGAGCAAGCTTCCACCAGCAACAAGCCAACCGTCGCCATTGGCGC  
GGTCAGCTTTGCTAAAACCACTCGCCCCGTCGTTTCGCGAGCGACGAGGCGCGTTCGT  
TGCCGTCACGATGCTGACGGCTCCACGCCGTCGCCGAGGCGTCATCTTCAATATTT  
TTTGCCATGGGTGAGAATGGAGCGTTTCGCCCCGCATAGGCGAAGCCATCCGGCACGT  
CGCTGGTCTGGATTGAACATCCATGGGGCACGCCGTCCGTGTAGAGGCGGAACGCA  
AAACGCTGTCCGTCGCTCGCGATGGCTCCGCAAGCTTCGTTTCCGCTCTGGCGTGTA  
AAGTCATGAAGCACTCGCCCAGTGCGGGCGCAGGAAGTCCAGCAGGGACTCCCCTGG  
CTCGCTGGTGTAATCGCCCAAGTGCTGACGCTCCCAACCACCCGATTTCGATTCCGGT  
GGGCGGAATCGAACCACCCTGCGCCCACGCCGGGCCGCCGCCACCAATGCCACCA  
CCGCCAAGAGTTTCCACAGCATGCCGTCCTCTTTCGAGAACGGCCGCCTACGAGCCC  
CTTACCGTGCCTGCATGCTACGATTGGGTATCGTTTGAGGTATCGTTTTGAGGGAGC  
GGCTCCGGCAACATCTCCTTGCAAGTTCAACTGCTTAGGAAAGGGTGCCGGGACGATC  
CGCCACCTCCACCATCTGATCGCGGAAAAGAGCAGTAAGTGCTTGATTTTCGCGAA

GGTTAGGCCCGGGGTTTGATGTTTCAGTTTGAGCCTGCGTTAGGTATCAAACGAGGTA  
TCAAACCCCGTGCCGAAGCCTTATTTTTTGCGCCGCCCTGCTGGGCTCTATGTGCGCT  
TTTTCGTCCCGACCGATCTGCAAGCCCTCATTGGCTCGCGCTACCTTGTCCGTCCCGT  
TCGCTTCTCCCTGGGTGATGCTGCCCCGACTGGCCGTAGCTCGAACTGCTGTGGCACT  
CTCGGAAGCATTCGATCAGATGCGGCAAGGAGCGGGCATGCAGGACGATTTGCTGA  
GTCAGGCTCTGGCCGGGTTGCAAGGGAACGAAGCCCGCCCCTACACCATCAAGGTC  
GGTGGCGTGAGCGCTCTGCCAACGGAGCTGAGGATCATGCTCGGCTGCTGGACGC  
ACTGAAACACCTCCCCCTTCAGCAACTGGCTTCTGTGAAAAGCGCCGGACCGCTGCT  
GTCAGAGCGCGCCACCATCCACATCAGTGAAATGCGGCGTGTGGGGCGAAGCGCGA  
AAAACGTGCTCGACACCGAGCACAGCCTGGGGCTGTTTGTGGCCCTTGTGCGCGAC  
AAGCCGGTCGAAGACTACAAGACCGATGACGTCCGCCAGTTTCTGGATGCGCTTGA  
GCACTACCCGAGCAACGCCACCAAGAAGGCAGTGTTGCGCGGCCTCACCCCTGTGCG  
AAATCCTGAGCAAGGCGCGGCAAGGTGGTCATGAACTGCTGAGCATGCGCACCAAG  
GAAAAGCATCGGGATCGTATTGCGTCCTTCTTCAACGCCTTGGCAAACGAAGACCTG  
ATTAGCAAGGCGCCTCACAAAGCCATCCTCAATCGCGCCAAGTCGCTCACCGATGA  
GCCGAGTCGTGATCCGTTTAGCCGGGCTGAGCTCGAAGCACTGCTTGAGCTGAATGC  
ATTCACGTCTTGGGCCAAAAAGTATCCGCATCGATGGTTTGGCACGCTGTTGGGATT  
TGCGACCGGTGCTCGGGTCAACGAGGTGCTCAGCTCTATGTCGATGACATCGGCAA  
GGTCGGCGATTTCTGGGGCGTGCAATTTCCGGGGAGCCAAGCCGGATCAACGCTTGA  
AGAACCCTCACTCCTCCCGCTTTGTGCCCTGCCACATCCTTGATCGACGCTGGGTT  
GTTGGTCTATGTGGATGAGGTCAAGCACGCAGGCTTTGAGCGACTGTTCCCGCACCT  
GCCCTACAACGCCGAAAACGGGTATGGCGACGCGCTAGGGGATCAGTTCCGGGCCT  
ATGCGATCAAGCAAGGGTTGACCCAGCGGCTCAAAAGCTTTCACTGCTTCCGGCAC  
ACCTTGTCCAATTCGTTGGTCAATGAGCACGGCGTCTCGCTTCCGATCTCCCAACAA  
ATCACTGGCCACGAAGTACGCTCCCGCCAGGCTTGAAGCATTACGTTGACCCACCT  
TCTGTCCCCGCTCGCTTTTTGGCCATTGAGCAGTTTCGGCCCCGCCGCTTCCTCTGCCCG  
CTTACACGCCAGGGCAATTTGATCGCGCGTTCAAGCAGGTTTCGCCACATGGAACGG  
CGACGCGAGCAAGCGGCAAAAAGAGGACGACCAAGACACGAGCAACGGGATGGA  
AGAATTGAGAATTCGAGGGCACTTGGCACGCCCCGAGCGCATGTTTTCTCCAAACCAG  
GCTTCCCCATCATTACTCAAAAGGCACAGGGAACACCGATGTAAGCGCCCTCACCC  
ACCTTCCAACCCAAGGCACCCCCATGCAGCCAACCAAGCTCTTTGTCATCGGCAATG  
GCTTCGATTTACACCATCGCATCCCCCTCCGGCTACGAGCACTTCCGTGACTTCGTGCG  
AAGCTCATGATCGCGGGGTCTTTGATGCGGTGGAGCAATATCTCCGCCCAAGCAGTA  
ACTGGTCAGACATGGAGGCGGCCTTGGCCGGAGTGGACCCAGACGAGATCATTGAG  
GATCTTGGCCACTTCATGATGTCTTATGGTTCCGATGACTGGAGCGACTCAGGACAC  
CACGACTTTCAGTATGAGGTGACCTCCTAGTCGAGCGCCTGAGCACGGAACTTCGG  
CGACTGTTTGGCCTGTGGATCAGACAGCTGCAAATTCGACCCAAATTCCAAGCCAC  
CAAACCGTCCAGGTGCTGGATCCGACCGGCGCCTTTTTGTGCTTCAACTACACAACA  
ACGCTGACCCTTGCTACGGCATCCCGCGCGAGCGGATCCTTTATATCCACGGTTGC  
GCAGATCAAGTCGACCAAGATCTGATCCTTGGACACGACTGGAAGCCAGAAGATCG

ACGGCCTCTCAATAACCGACCTGATGTCGCCGAGCTGGATACACGCTTGACCGAGGT  
CCATGACATCCTGGATAGCTATTTCTCCAACACCTTTAAGCCGTCTGATAAGCTAAT  
CCACGCGCACTCCGGCTTCTTCGATTGGCTTTCATCCGTTGAAGAGATTTATCTGCTG  
GGCCATTCAATTGTCCGATGTCGATGCCCCCTACTTCGAAGCAATGCTACGAAACCCA  
TCGGTGCGCCAAGCAGACTTTCGGCTGGCGATCCATGATCCCAAGGACGAGCCAGG  
CCTGCTGGATCAACTGATTGCCTTCGGCGTCCCCGCAACTAAGATCCGGACTTACAG  
CTGGGCGGAACTTTGCTCGCCTCGACCGCTGCTCTAAGCAATCAATGACTCAACACG  
ATAAATGGCAGGTGTCCCTGCCAAGTCCGCATCAGGACAGCTCAACCAACGCTGGT  
GTCGCAGCCAACTCATGCTCTATCGCAGCGACTTCCTGCGCGACCCAGGCCAAATGA  
TGA CTGGTGTGCGAACTTGATCCAGCAGTTTGCTCCACCCGGCCCCACTTTCTTCTCAC  
GAATGGCACGACGGTGGATTTCTTGATCACCCAGCTAAAAGCTGCTCCCATATAGT  
GCGGTGAAGATACGACAAGCTGCGAGAGGCGATACATCTGCTCTCCATCATCTTTGG  
CCTTTGACTGCCCACGCGCAATGAAGGCGCCGTTTTCTATCGTGTAACGGATCTTGC  
CATTTACATTGGGATTAGGCGCAGAAGAGCTTCTCGGGCCACGCACACCGTAGTCAC  
CAAACACGATAGGGAAC TGACGAAACATTTGCCGAAGCTGTCGCCATGCCACCATT  
TCCTTCCGCATCACGACAGCTTGCGAGTTTGGCTTTTTGACCGCCTCATTGATCGAAG  
GCGGCATCGAACAGCCGACAATTGAAATGAAAGGCAAGCCCAGTCCATCGACTAGC  
GTCAGCACGCGTGCCGAAAGATCCACAAGCACCTGAGGATCTTTCTTGCAAACATC  
ACCAAAGTCCACTAAGAGGCCAAGCTGCCCAGCATTGAGCCCCAAACCTCGCAAAA  
CTTCATCTATCCTGCCGAGGAAATGACCAGGGTCAATCGCATCCTCGATTTTCATCCG  
TTTGCACTCGCAGCGCCACATCGGCAGCGAGTCGATATCGAGGGATTTTCAGGCTGA  
ACTGATACTCTGGATCATCCCACCGATCCAGACCAACAACAGGAATCACTGATACCT  
CACGCTCCATCAGTGCATTGACCATGAAAGCCACGGGAAGCTCATTGGATTCGATCC  
GCTCGTAGTGCTTCCAGGCAAACGCATCAACCATGACAGGCCCAAATGGCATGACC  
TCTTCGATTTGATCAGCAATCCAATTGAGGTAAGTCATCTTCGGCGTCGGACTATGC  
TTATAACGTGCAACTTTTGCCGTGAGCTCCGTAAATGCATCGACCTCAAACAACGGT  
AACATGCCTTTGAGGTGCGAAACCTTGGA CTTCGCCAGAGCACAGAACTCACCATCT  
TTCGCATGAAGGAACGGCGTATACGACACTTG CATATCACACCTCTACGATTGAAGG  
AGGGAACAACGCACGCACACCATCCTGCCCCACCATGTCACTCAGGATCTTG TAGTT  
ACCGCTTTCTCTTCGAATCCGCCCCGCTATGATCGCGGGATGAATTTTCAGCTCTTTA  
GACAACTGCAATACGCTTTCGCGTGATGGTGACTGATAAGCATCGCTTCGCTTCCAA  
ATCAGACGAGGAATGAAGGCCTCTCGCGCCAAGCGATTAGCCTCCGCCTCCCTTCGA  
TCTTCCGAAGAGGCATCCAGGTCATCCAAAAACGCATCGTTGTGTCGTAACATGCTTC  
CAAATGTGCACCACCTCATGGAGCAGCGTGAACCAGAAGTTATCGATGCGGTCATA  
ACGCAGCGTCAATCCCACGATGGGTGTTCCGTCAGCATCTTTTAACGCCGCCCCGTC  
AAGCTGAGTTCCCTTCAAGTGCTCCTCGATGACCACCACGATGCCGTGACGATTGAG  
ATACTCCACCGCTAACTGGGGACCTCGCTCTGACCAGCTCATCTGAGCTAAATCCCG  
CAGAAAAGCCGCAGTCATCGCATTAGGATCGTATATTCCGATGGTGCTTTTCATGCC  
CCTGGCGCGATGAATGACGCGGGCCAACCAAGCATAGAGCGAATAACGTGTGCGGG  
GTGATTGCGCCTCACCCGAGATCGTCCTTCGGAAAGAAGCTGCACCAAACCTGCAAA

CCAGAGTCCGTAATGAAGCCGCGCACCAAGTCTTCGATTGCCGCAGAGGCCTTCGTC  
GACGCACCTTTGAGCCAGCCACGCCGACTCATTTCTTTGAACGGGAACAGAGCCCA  
ATCGACAGTGTCACTCTCTTTGGACGCTAAGCCGCTTTGGCCGAGCCCCAAGAGCGT  
ATCTGCAGAAATGCCAAGTCCCAAAGACAACCTCTTTGATCATCTGAACAGTCAAAG  
GCCGCTTTTCGTGAAAGGACTTCGGACACGCGACTGCTGGTCCCAAAGAAGGGAATC  
AAATCGACCTTCTTCAAATTTTTTTCTGCATTTCGGAACAAGATGGCCTCGATAGGA  
TCAGGCGGCTCTACCGGATAGCGGGAGTTCTCGTAAGATTTCGACGATGACCGAGAG  
CAACTCCAAACGGTCGCTTTCTTCTTGGACCAATGCTCCGCCCTTGGCCATCAAAAT  
CATGATCTCGTCGAGGTAAGCTTCGTATTGCTCTTGCCTACGGATCACCTTAGGCAT  
AGGCGGCGGTGTCGGCTTAGCGACCATAACGAATCATCCCGATTAATGAATTCTTGAA  
TTACTGCAACGCCTTGCGGAAACGCGACCGCAACGACGACATCAACAGGCAGCTCG  
GCTACCGGGAACGCAAAGCATCCAAGTCCGGTTTCTCGAACCCGAGGAACTGGCT  
GCGTATGTCAGCGGCTCGCTTCCAAGATGCACTCCCGATTTCAGATGCCCAACCACT  
TGCCCAAGTCTTACTGCTCGGATGCAAGCGCATCAGGTCGTGCAACTTCGGCTTTCC  
TAGCAATCGCACACGAATTCCTCCCGATTTGGGAGGATATTACGCCCAAAGAATCCG  
CGCCGCAACTCCCAATTTGGGAGGAAATCGAGTAATATCGCTATACTGCCAGCCA  
GGGCGTAATGGAACCTAACAGTGGCTATTCACATGGTGACTTGGAACCTGAACCGG  
GAGCCGGCCTATGAGGTTAAGCGTCAAGCCTTTATCGAGCACATCAATCGATATGCA  
AACGTTTCGCGATCCCTCGTTAGAGACCGTCAGATGGGTGGAAGTGCTGGCACCGCT  
GAGCAGATGAGCGCCGATCTGCTCTCGAAGCTGGATAAGAATGACAGCCTTTTCGTC  
ACCCAAGTCCTGCTTGACAGCATCAAGGCTGGCTCAACCAAGAGGTATGGAACCTG  
GATCAATGCCCCGATTGCGCTGACCTATGGCCACGCAGCTGCAGGGGCACCTCGCCTCT  
TCGCGCGTGGCCGATTGATGGACTTGATGGACTTGAAACCGACGCTGCCAGGCGAT  
GCATCCGGTTGATAGCGGGAAGTCCATAGCGCAGAGCTATAAAAGCGAAACCCCGG  
GAGAGGCGATGCCTGACCCGGGGCTCTAAGACAGGTGCTTGACGACCATCCCGCAT  
GCGGGCTATCCATCAAGCTGCTGTGTCTTTTGACTATACTTAGCACATGGGCGAATG  
TCAAACACCTTTCACTTACGACGCTACCAGCATCCCCGAGCTCAAAGGGTGATCTC  
CGACCCGCGTTTTGAGCCCTTTCGAAAGAGGGCCGGTTACCAAAGCGACGAGCTAG  
CGTTTGCATATTACCTCTACAACGCGCGCCTTGCTAAGTCGCTCCTGTTCCCACTTCA  
CATCTGCGAAGTGACCTTACGAAACGCACTCAATGACTTGTTACGAGCAGCTTCAA  
TGCTGCTTGGTGGCGCGACCCGGCTTTCGAGGCCCTACTGACTGTTGAAAGCCAAAA  
TGCGTTGCAAAGAGCCATTGCTGTCCAGAGCAAAATTGGTCGCACCGGCACCGAAG  
ACCTCGTCGCAAAGCTTTCCATGGATTTCTGGTCCAACCTTTTCAGACAAGAATACG  
AGGCGCTGATTTGGAAACGCTATCTGCTTGCGCTCGTTCCATCGGGGGACGCGACCT  
TTGAGGACTTACGCACTAAGCTCAAAAAAATTACAGCCTTACGTAATCGGATCGCGC  
ATCACGAGTCGATTCTGGATCGAAACATCCAAGACCTTCTTGCCCATGTTCACTTCA  
TCATAGGACTATTCTCGCCACAGTTCTTGAATGGGTAAAGCGCACAGCACCGTGC  
ACATTGCGCTCCGCAGCGCCCCTAAGTCCACATCGCAGCTGACCTTAAACAACCGAT  
GTGACACTAATTTCAACAACCTGCAAGAAAATGACCTACTCAAAAGTTTGCCGATGC  
CACTGCAATTCCCTTGCAATTATCCAAAATGACGCAGCGGAAGTGGTCAGTGTCATTG

ACGGAAATGACATTGCCAACTTTATCTTGACGGAAGCTGAAGATTGGTGCCTTCTCG  
ACTTCGGAGACATGCCAATCTCCAAGCTCCTTGGCAGCATGCCGACGATCAAGAACT  
TTGCCTTGGCCCATGAGGATGATCATGCCAGCACGCTGCCCTCGCTTTTTTAAGGGAA  
AAGTTAAGTTCGCAGTAATCCAAAAGCGGACAACCTGACTCACCCATTGGCTTGATCG  
CAAAAGCGCATCGGCGCTATTAACCGATATCCAAGAACTTGGGATAAAACGGCTCC  
TCAGAGCAGCCCCACATCTGGATTGCATGTTTCGGCAAGTCGAATATTTGATTTTTTT  
TGTCGAACTCATCACGCCAGTCGACACCAACCACCCCGTCCACGAAACAGCTCATA  
AGAGCCAGCCCTCACCTCGCATCACCAAGGTCGTTCCGTCTCAATACCTCCGACCAC  
GCCAATCCCAGCAGCAATTATAACGGGCCATCGACGGAGGGCACACATCAGCCGAA  
AGCCGTCGCGATGCATTACACAGCCTCAGCTTTGTCCACGCTAAGGCGACGGCCTGA  
GTCTATCTAGCACCGGTCCCGACCTCGTCCGGACGCATGAAGCAGAAGCTCGGTAC  
GAATAAGAGCCCCGCATGCGGGGCTCCCTTATCGCTGACGTTGAAGCCTTAGTCTCG  
GCGCCGGGTGCCAATGGCGGACGACGTTGTTCCGATCATTTGGCTGGAACCTTCTGC  
GACAACCCAGCTTCCAGCCAAATCCCTAGGCGCACCATCAGTCTGCAGCGCGGTC  
AACGGTCAGAGTTATCTGAGCCGTCATAGACCTGGCTTGGGCGGACGGAATTTCAAC  
TCCCAATGCCCTGCCTCACCTCGGCCTGCGGTGGAAGTGCGTCCTCTCCAGATGCC  
TCAGGCCTCAGCACCTCAATCGGCTGCGTCGCGAAGTTCTTCTTCAAGGCCTCAGCC  
GCCTCCACCATCGCTTTTCGAGCCCGCTTGATCCGCCCTGCTGGATCGCTTGGATGC  
GCGGGGAGACATGCCTCTTCGTTTCGCGCCAAGCGCCGCTGTGCTCTGGCCACCACT

>CONTIG\_7\_length\_19120\_cov\_37.166640

CGCCGGGAACCTGCAAGACACAACATGAAACTGGTGGAGGGAGGTGGATTTCGAACCA  
CCGAAGGCGTAAGCCAGCAGATTTACAGTCTGCCCCGTTGGCCGCTTGGGTATCCC  
TCCAGCTTTTACTACCGGACCGGGGCGCGATAAAGCGATTTCGGTTCGGGGTGAAGC  
AGCCCGCTATTTTGTGTTGTGGGAGACAAGCAGTGTCAACAAAAATTTTCGCGCTATTTG  
TCACGTCTGAATGTGCGCAGCCATGCCGGCCGCACGCACCCGCTCAGACGTTGATCA  
CACGTTTAAACGTTGATCGGTCGGCAAAGTGCCGTGAATGCTAGGTTTCGCGGGGAA  
ATCGCGGCACGGACTTTGCGGGAATCGCTGGAAGTACCCCCAGTTGTACCCCCATAG  
GGGTATCGGGATGATAAATCAGTCTGGATGCCGGTGCCAGCGCTGCACCTGCCGGA  
TAAAACGGGTATGGCGCAGACCGCATTGTTGGCTGACGCATGGAACGGTACGCGAT  
GAGATGCAGGGGAACGGGGCCGACGTGGCCCATACCTTGGAGAACGCTCATGGCAGA  
CCACCACACCCGCCACAACCCGCCTGGGCAAGACGCCCTGTTTCGCCACGCCGGCAT  
CGCTCATGCTCGACGCCCCGCTCACGCCACTGGAGCGCAATGGCTGGCAGGTGCTGC  
GCATGCTGCGCTCTGCGGAGGGCATCAGTCCGCTTGCAAACCTGGGGCAGTTGCGCC  
GCTATCTCACCTCCACCCCACTGGGGCAGAGGGCCGGATACGAGACGGCCCGGCGC  
GTTCTCGTTGTGCTTCGGCTGACGGGCTGGATCAGCCTAGTAGGCCAGCACCGCGAT  
CCTCTAACCGGCCATGTGCTCAGCGAGCTGTATCAGGTTACGAAAGCGCCCTGCAC  
TTCCAGCAGGCTTGCACGCTCGATGCCAGCCTGCCCGCGCTTCTGCAAGCGTCTATC  
GGCCACGAAAACAATCAGGTCGATCGGGTGGCCGTCCACACTCAGGCAACTTTGGC  
GCAGGCACCTGAAGCCACTTCCATTACGGCCCACAATCAGCCCCGCGATGACGATG  
ATTTGCCCCCGACGCCGCCGTCGAGGCGAACGAGGCAGCCGACCCACTGCCATTTT

CTGGCGATTCCGCTGACAGCACGCTTGTTCCGCAACAGGCCGGACACGCTCGACAC  
ATGACGGCTGAGCAGGGCGGTACGTATAAGACGTATATGTATAAAAAAGAACGTAC  
GTACCGCGCGCGCGAAAGCGACGGCGATCCGGCATCGCAGTCGGTGAGCTTGCCGC  
CTTGCCTGAGCAATGCCCAGGCAGATCAGCAAAAAGACGTGCAGGCCGCCTTGCGG  
CGGCTGCCGCCGCGAGCATCGCCAGGAAGTGCTCGACGAGTTGCAGGCACGCAGCCA  
GAGCGGCACCGTGCGCAATGTCGTGGCCTACTTCTTCGCCTTGGTGAAGCGCGTCTT  
TGCGGGCGAATTCCGCCTGTGGGCAGGTCGTAAGGAGACATCTGCCGCCCCACGGC  
CTGCCGAAGATCGGCCTGCTGGTGTGCCACGCACCGAACACCGCCCAGAATCGACT  
GCGCCACCGGCATCGCGTGAAACCGCCCTGGCGCACATCGCCAACATCCGCAAGAT  
GCTGAATGCCCCGACGAACGCTGGGGACATCGCAGCACAGGCAATGCAGGCCAGGG  
GATGGCAGCCGCATCCTGCGTAGCAAATGCCGCCGCGAAACGGGGTCGTCACCTGCAC  
GCCGAGTGACGACCCCGCCACGCCAGCAACAATGCGGGCGAATGCCGAATCCTA  
TTGCGTGCGGCAGACATGATGATGGCCGCCCTACACTGACCGGGCAGTTGCCAAGA  
CCGATGGGCCTCATACATCGGCAACCCCAACAGCGCAGATTCTGCAAGCGCTGGC  
CCGTCAGGGCGGAACCACCCAGGTATGCCCAGGCTCCGACCGCATACCGGCCCTAC  
CCAAGGGCGGAGCCCTCTTCGTCTGTTTGAATCATCCCTACCACGCCGCCTGGCGC  
ACTGTCCTTTGCGGCAATAGCCTCTGTGCAATGCACAGGACTCCCGCTGCTTTTCCC  
ATCCCACTCTCTTTCATAGGAGGACTCGTCCACGTTACATCACTTTCGTCTTGTAGT  
ACCTCCGTCCGGGCTTCCAGCAGGAAGCAAGACGGATGCCTCATTAGAGGCCCTGG  
TGTCTCCTGAACACCATGCCCTTGCCCTCACGGGATCTCGCCTTGGCGAGTTGGCAC  
CAACACTAACCATTGAGTTTCAGGACAACGCAGTACGGCGCTTTGCTTGGAGGCCGG  
AAGATGGACGACTTGACCTATACCCTGCGGCAGCTTTGCCAGCGCAACCGTGACGG  
CAGCTACAACACGCAGGCCGACCGGATGCGTTTCGCTGACTCTGGCCGCGCGGCAAC  
TGCGCGAGGCCGGTTTCCGGCAGATGAAAGCCTCGTCGCTCAAGGGCAAGCACGTC  
CAGGCGTTGCTGGACCGCTGGCAAGGCGAAGGCTTGTCGCTTGGCACCATCAAAAA  
TCGGCTCTCCCACTTGCGCTGGTGGGCGGAGAAGATCGGCAAGGCCGGCATCCTGC  
CCTCGAACAACACACAGCTTGGCGTGACCGAGCGCCGCTATGTGACCAATATCAGC  
AAGGCCTGTGAGCTGGGTGCGAGCCTTGAGCAAGTCACCGATCCCCACGTGCGAAT  
AAGCCTTCAGCTACAAGCCGCATTCGGATTGCGTCGGGAGGAAGCGATCAAGTTCC  
AGCCCAGTTACGCGGATCGGGGTAACCATATCGCGCTCAAGGGATCGTGGGCGAAG  
GGCGGCCGGGAGCGAACTGTGCCCCGTCACCACGTCAGAGCAACGCGACGTGCTCCT  
GGCAGCGCACCGTCTGGCGACTACCGGGTCATTGATCCCGCCACACAAGACCTACA  
TCCAGCAACGGCACGTCTACGATGGACAGTGCAAGGCGGCGGGCCTGAGCCATATG  
CATGGCCTTCGTCATCAGTACGCGCAAAGCCGCTATGAGACTCTGACGGGGTGCCCT  
GCACCAGCAGCGGGAGGGCCACCCGTCAGGACGCTGAGCGATACACAGCGAACCC  
AGGATACCGCAGCACGACAAATCATCAGCCGAGAGCTTGGGCACGAACGGCTGCAA  
GTTACGGCTGTTTATCTCGGAAGATAAACAGCTTGGCATCCGCTACTTACCACCTC  
CATCAGCTTGCCGAAACTGTCCACCACGTCGTACTTGACGTTCTCCGGAGCGTAGCG  
GCGGTTTCATCTCATCGAAGAACTTGCGGGCGCACTTGATCTTGGACTTTTCGATCTC  
ACGCAGGTCCATCGAGGACATGGATCCCTTGTTTCCGCCACGAAATAGATGTGCTT

GACAGCGCCTTCCTTGAAGCTGATCGCCCAGTCCGGGTTGTAGTCGCCCACGGGCGT  
GGGAATAAGGAAGCCGCGTGGCAACTTGGCATAGACCACCACTTCATTTGCTGTGTC  
CAGCTCTTTACGAACTCCCGCTCTACCTTAGAATCCGTCAGCCCATAGTCGTAGAT  
GTGTCGCTGAAGTTTGTACCGGCCTTGCTGAAGTCCTGCTTGGTCTGCCCAGCGGT  
AAAAATGTCGAGGTCGAACTTGTCTCGACGGGATCGTAGGCCAGGTGTTTCGATGAT  
GACCGTGGCCTTCTGTTCTGTTGATGAGTCGCGTGGCCTCGGCGATGAACTTTCCGG  
GTTGGTCTTGAAGTGTGCAAAAACCGCGACGTTAATAACCCTTGAGGATTTCCGTCAC  
CATGCGGCGAGTCAATTGAGTACCTTCGGCCAGCTTGCCGATCAGGTCGTACTTGAC  
CGCAGAATGAATCGACTGCTTGTGTATTCTGGTCTTCGTTTCGGAAACCTTGAAACC  
ATCTCCACGCTTTAGCGCCTCGCCAGTCACCTGGTCGATCTGTTTCGCCTGCCTGGATG  
GTGTATTGCAACGGGGTCACGCGCAGGGCTGCGTCCAGCTCCTTGACCGCCTTTTGC  
ACCAGCTCGTCCGAGTCGAAATCGACACTGTAGGCCGCCTTGCGGTTGATGCGGTTT  
CACAGCGCCTTGAACTCCTGTTTGTCTGAAGTTGGCGTTGAGCGGGTTCTTCTTAGGTT  
TGCGGTCGTCGCCGATTTTCGGGCAATTGGCTGGCACTGAACACACTGTCGATAAGCT  
GGTACACCTGCGCGGGCGTGGCGCTTCAGTTCGTCTGGCAGATCGGCCAGCGTTCCGG  
CCTTCTTGGCATCGTGATACGGACCCGCGATCCGATCTGAATCGTCTGTGTAGTCGTT  
TTTGACCAAATAGCGGTAGATTTGCTTCGCCAGTTGCGGCGTAACCGGCACGTCGCC  
GGTCGCCGTTTTTCAGCACCTTGCCGGTGAAGTATTCCTCGTTTGCCACGCGCGGACG  
TTCCGACAGCGAATCGCTGATGTCCTTCTGCAGCGCGGCCACAAAGTCCTTGAAGCT  
CTCGCTGGCGACACCGTTCAGCACGTTTCAGTCGTGCACGGTTGCAGGATGATCCAT  
CCGGTCGCCTGTCTGGTTGACGGACAGCCGCAAGCCACGCCCCACCTCTTGTCGGCG  
TGTGACCTCGTTGTTGTAGTCGGGATGCTTCAAGAAGCAGATCACGAAGACATTAGG  
GTTGTCCCAACCTTCGCGCAGGGCCGAGTGCAGAGAAGATGAAACGCACCGACTTCT  
TCGCATACATCTCTGGGCTATCGCTGGGAGTGGGATACGAAAGCAGCGCTTCCTTAT  
CCTTCAGGATCAGATCGTAAGCATCGACGTCATCGGATAGGCCCGCATTTTCGCCAC  
GCGCGGCGATAGCCGAATCCACCTGCCGCTTATTCTTCTTGTCGATGGAGAAGTAGC  
CGCTGTGGGTCTTGTTCGCCGCGATGCCCTTCAGGTAAGTACGTCGTCGTCGTCGTC  
CAGATCGAGCACCTCGTTCAGGTAAGTACGTCGTCGTCGTCGTCGTCGTCGTCGTCGTC  
TTCGCCCTTTTCGTCGGCCTGCGTGTAGTCGCGGTAAGTACGTCGTCGTCGTCGTCGTC  
AACAGGGTCAGCACCTTCAGGCCCTGTTGGAACAATGCCTGTTTCTTGTGCAAGTGC  
GCCTTGATGGCCTCACGAATCTGGATGCGGCGCAGCGCTGCCTCGGTACATCGCCG  
GTGGCGTCACCGACCGTCAGCTCCACGCCATTGGTGAAGTACAGCGTGTGCGGAATTG  
GCATTGATGTGCGGAGACGACAAAGCCGTCGCGGTATTGATCCAGCCCGTTGGAAAA  
TTTCTCGGAGAACAGGTTGTCTCCCTTGCTAAGCTTGCGAACGATACGCTTGATATT  
GCCGCCCGCCAGCTTCTGCTCGAACTCCACGCGCGCCTCGGGCGGCTTCTTGCTCGA  
AATTCGATGGATTGCAGGTACAGATAGCCCGCCGTGCCCGCCAGCCCCTTACCCGT  
GATACCGCGCACAGCAATTTTCTTACCAGCTTCTGGTTATAGGCGTCCAGCGCATC  
GAGGCGGTGAATCTTGTGTGGGTGGTCTTGTGGGTGGCTGAGTAGCGCAACACCAT  
CAGTGCCTTGAAGTCTCCAGGGATTTACAGCGTCGCCGTACCTTCCATCTTCTGCGGC  
TCATCCAGAATCAGGATGGGACGATTGGCGCTGATGATGTCGATTGGTCTACGTGAC

TGGAAATCATCCAAACCGACCATTTCAGTCTCGCCTTTGGCATTACCCCTTGGCGTTC  
CGTATATGCGGCGAGCATCTGCTCCGCGCGAGGCGAAAGCCTGCACGTTGATCACC  
ATCACGTTGATGCCCCGCTCCGACGAGAAGTTCTCCAGGTGGTGCAGCTGCTTGGAG  
TTGTAGATGAAGAAGCGCGCCTTCTTGTGATACGTCTCCAGGAAGTGCTCGGCCGTG  
ATCTCTAGCGACTTGGCCACGCCCTCACGGATGGCGACGCTGGGCACGACAATGAT  
GAACTTGCTCCAGCCGTACAGCTTGTTTCAGCTCGAAGATGGTCTTGATGTAGCAGTA  
AGTCTTGCCAGTGCCGGTCTCCATCTCGATGTCGAGATTGACCTTGGCCACTTTGGTC  
CTGACCAGCGTATCCGACAACGGCAGGTTCTGACCCCGCTGGACGGCCTGGATGTTG  
TCCAGCAACGCTGTTTCCGACAGCGTGAAGTCGGCGTTGCGAAACGCGGCTTCCTTT  
TCCGCTGCAGCTTCAGGCGAAGCGGGCTCCAGCACGAGCGCTGCTTGCAGGATCTCT  
GGGGCGGCTTTCTGGCTGCCGGGATCGAGCCGGTAGCGAATGCCGCCGTGATGTGG  
AACCTGCCCCTTAAAGCAGTCCACAACCACCTGCACTGCCGCCGTCTGGTAGGCCTG  
CGTCTTGAACCTTCAGTTTCATCCAGCCTCCTCAGATACTCTTCACTTCGGTGGATGGC  
GACAACAGCTTGAAGATCTGCTCCACGTTGATCTTGACGGCGCTGTCTTGAAGCCC  
GCATCGCGAAACACCGCGCGCAGCGGCGTGTGCGTGGCCAGTTCCTTGACGAAAGC  
TTCGTCGATGCCGCTGTGCGCGTCAAAGCAGGCGGCGAGCGCGTCGCCGTCCACGA  
AGAACACATCCTTGCCCTGGATGGCCTTCTTCTCGATGGACAGGGCAAAATCAACGC  
CCCAGTCCAGCATTACCTGGAACAGCAGGTCTTCCGCCGTACGGTCGGGCTTGATGT  
TGTCCACAAACATATCGAGATTAGCCTTGTCCAGTGCATCTGGGGAGTAATACACGT  
CGGCCATGTTTGAGGTGTCGATCTTGAGGACGCGGAAGCCCAGGTCAAGCTCTTGCT  
TGCTTGCTACCACTTCTGCGCCTATTTTCTCCGCGACCCGGCGAATGCGTTCCTTGCT  
GATGTCGGCAATGTTCTTGTGGCCTGCCTTGAACGCCTCTGTGTTTTATTGCACGGC  
TCTGGTAGTTGCACCATGATGAAACGGCGACTTCCTTCATCTTCAGCATTCAACTGA  
AGGATTGATTGGGCTGTCGTTGCAGAGCCTGCAAAGAAATCAACGGCAATGAAATC  
GTTACCGCGAATCATGCTTGCAAGATATTTGATCAGTTCTACAGGCTTGGGGTAATC  
ATCAAATGGAACGCCAATATAAGATAAATCAGCAGTCGCTTTTTGCGGCCACCAA  
AGCCAGTCAGCATAGAAATTACATGACTAGGCTCACCACGAACCTTGACTGCTTCAA  
TCGCGCCGCTTGAGGAAAGCTCGAAACTTGTTTCTTGCCCCTTCGCATCAAGTATAG  
GTTGACAATTTTTCTCAATGAATTCCTCCAAGAGTTCTTTTGAACCTCCAGCCACTGTA  
AACTTTTGCAGGACGGGTTATTTTTCCATCTTCAATATAGATTTCTTCACTTAGATGT  
GGCCATGAATCAGTTCTTCTGGCAATGGTTCCACTATCAAAAGCAGCGGGAAAGCCT  
ACTGGCAAGGTTATTTGCTCGGGGGATTCTTTGGCCCGTTTTTTACGATGGTGTGTC  
GTATCTCCGCGCGAAAGATTTTGCTGCCTTTTCGGAGTATTGGGATCAACAGTTAACG  
GATGTGGAAACTCGGACTCCTGCTTGGCGTATGCAAGGATGTACTCATGGCAGTACT  
TGAATTTGGCTTGTTATCGAAATTTCCATCCGTGCGCCATGCGAAAAGACAAAGCA  
TATTCTCCTCCCCGAAACTTCGTGCGTAATTTTTCTGATATTTGCCACCTCTTTGTG  
GTTGATGGAAATGAAAATCGCACCATCTTCACAAAGAAGATTTTCGAGCAAGCCTGA  
TTCTAGAATACATCATGGTTAACCAATCGGAATGCATCCGGCCATTGGCTTCGCTGT  
TGGCAATCAGGCGATTTCGTATTTCGTCTTTCTGATTTCGAGCGACGCAGATATTCAC  
CTGCGTCCTCGGTGAAGTCGTCCACGTAAATAAAATCCTTACCTGTGTTGTAAGGCG

GATCGATATAAATCATCTTCACCTTGCCCAGATACGTCTCCTGCAACAGTTTCAACG  
CATCCAAGTTGTCGCCTTCGATAAACAAGTTCTTCGTCGTATCGAAGTCCACGCTTTC  
CTCGCGAACC GGCGCAGGGTCTTTGCAATCGGCGCATTGGCCGTCAGCAGCGCCTC  
GCGCTTCCCCGGCCAGTTCAGGTGATAGCGCTCCTGCGGCCCTCGACAATGGAAC  
GGATAGTTCTTGCCTGAGCTGGTCGAAGTCCACCGCCAGCTTCACACTGCCGTCCTC  
ACCTCGCGCCTCGGTACGCAGCCGGGGAACAGATCGCGGATACGCGCGATGTTGT  
CTTCGGTCAGGTG GGTGAGTGCATCTTCAGCTTTTCCATATTCTTATCCTTGGATT  
ATTCTTTGTCAGAAGAATCATGATTCTTCAGTTCGGAATAATTTCTCCGCCATTGTCGG  
GTTGCCGCGGGTCAATTTCTTGATCGTTAGATCCTCGGCCTTATCATTCGCGAGCCGC  
AGATTGTTAGCCGACTTGTAAGCGCATCCTTGGTTTTTTCCAAGTCTTTAATCGCCT  
CGTCTATACGTTTAAACCGCTTCTTCAAAGCCTTCTGAGGCCAGACGCCAGTTGCGCC  
CAAACGCGGTTTTAAAGTCATCTAGCTGTGTCTCGAACCGTGTGATGTCGAGATTCT  
GCGCCCTGACGAGGGCAAGTTCCGATTTCGTAGGCCAGCGACTTCATGGCTGCGTTGC  
GCAACAGTGTAATGATGGGGATAAAGAACTGTGGCCGTATGACATACATCTTTGGG  
TGGCGATGGAATACATCGACGATTCCAGTGTTGTACAGCTCGCTCTCGGGTTCCAGC  
AGAGAAACCAGAACAGCGTATTCGCAACCTTTTCAGTGCGATCTTTGTCCAGCTCC  
TTCAAGAAGTCTTCGTTCTTCTTTTTGGTGGCAGTTTCATCACTCTCGTTCTTCATCTC  
GAACATAATTGAGACGATTTCCGTGCCATCCTCATCCAAATCCCGGAAAACGTAATC  
GCCTTTGCTCCCGCTACGCGCGTCGTTGTCTTTCTCGAAGTACGCTCGCGGAAAGGC  
TGTGGCACGAATACGGTTGAATTCGGTCCCGCAGTGTTGTTCCAAGGTTTCGCCGAC  
CATCTTGGTTGATAACCTGGCCCTCATATCCCGAAGGCGTTCGATTTTCGTGCTCGCG  
ATCCTTGATCTGTACTTCGTACCTTTCTTCAGCGACTTTTCGGCCAGATCCTTCTCA  
AGCTCCTTGCGCTGCAAGCCGCTCTTCAGTTCATCGCGCTCCTTTTCAACTACACTGA  
CGGCTTCAGTTACCGCAATTTTTTGGCGGAGATTGCTGGCATCCAGTTTCGATTTAG  
TTCTTGATTTTCCGCCTCTCTTGACGCCGCTGTTTTCTGCAATTCAGTGGCAAGTCTTG  
CCTCTGCCAATGTTGACTCGGCTTGCTTGTGCGCTGTGCTTGAGCCAAATCGCTGGC  
CAGCGCGTCACGCTCTTTCTCTATGGCCTTCAGCGCATCCGCCACTGCTAGTTGCCGT  
GCAACATCTCCGGCGTCCAGCTTGGCCTTTAACTCTTTGATCTCCCCCTCTCTTTCAG  
CGATGGATTTTTGTAGGTTGGCGGTAGCCTGGGCTTCAGCGAGCGCAATGGCGGCTT  
GCTTTTTAAGCTTTGCTTGATCCAGTTCATTGGCCAGCGCGTCACGCTCTTTTTCCAC  
TGCGCTCAGCGCCTCGGTACCGCGAGCTTGTGCGCAACCTCGGCAGCATCGAGTCT  
GGCCTTCAGTTCCTGGAGTTCGGCGTCTTTTCGAGAAGCAGCCTTCTGCAACTCGCT  
GGTGATCTTGGCCTGAGCAAGCTCAACAGCATTGCGCTTGTCTGTTTCGGCCAACTC  
CAACCGCTCATGCAACTGCTTTTCAAATCGCTGTGCGTACTTGCTTCAGTATGTCC  
GCATACCCAGCCTCATCAATCTTGAATGCCTTCCCGCAGTGGGGGCAGATGATTTTCG  
TGCACGGTTATTCTCCTTTTCGCCTTGGCCAGGATTTGTAGCAGCATCTCGGGCACTTC  
ACCTTCCGCCCTGAGCGTTGCCGTGCGGTATGCAAGTTGATTTTTTGGCGAGACTGAT  
ACCTGTATTGGTTTCTAAATCTTGGCAGGCGGCAACCCAGGCCTGCCACTTTTCAGA  
TAGAAATCCTTCAATGTGATCATCTAGAATTGCCACATTCTCGGCCGTCTAGCTGC  
CGGAAAATCCTCTTGACCCAACCCGAAGTACTGGAGTAGTTTTCTGTTCTCTTGATAC

GTTCTGATTGCGTTCGCTATCAATTTTTTGCTGTGTTTTACCACTAGCTGTTGCACGC  
ACCACACAACCAGCATCGGCATCAAAGAGAGCATATGCAGGAACACCTATCGAATC  
CAAAATTGCATGCGCAAGTGGAATTGAGGTTTTTCTCCACAAAGACTATGGAAAC  
CCCCGCCGCCTCCAGTGAGCCGGGAGAAAATCTATCGCCGAGGCCATAGAAAACGG  
ATGACTCTGTTCGGGCCCTCTACGAGAAAGGCGCGGTTAGCGAAGAGTGCTATGGCT  
AGCTGGTCGGCTATATTGTGGTCAAGTCGACGGTCTACTACCTCACCATCCACGATC  
CCCTGAAGCTTGGCTTTACATCCGCAACTGTTGCATAGTGAACAGAAACCACCGGA  
GTCTCATCAGCCGATCTCGTCAGTCGTCTGACTTGGTCAAAATGGCGGGCCTCAAGA  
AAGTATGGGCTATGCGTTGCATAAGTCACTTGTATGCGTTTATCAGCATCTTCGGCA  
AGCGACCTAAGAACCTTTGCAAAGGCTTGTGCCTGGATCGGATGCTGAAAGAGTTCT  
GGCTCCTCAATCGCCAAACAAATAACCCCTTCGGCCGAAGCCGCGCCAGACTGAGC  
TAGTAGCTGGAGTGCTGAAATCAGAATCGTGCGCTGAAAACCATGACCCTGCCTTTC  
TACAGCGGTCTCGGTTGTGCCATCAAGTACAGCCACTTCGAATGTCGTCTTAGGGGC  
CTTAAGCTCTACGTCTGCGGGAGAAACAGTAACGGAGCGACCCGGCGAGTACGACG  
CGACAACCTCGTTTAACTGAGTCGTGATGGTATCAAGCTGTTCTTTGAACTTCTCTTC  
ATAGACTTGCTGTTGCTTGGCACGCGACTCTTCGACAATTTTCGCAATTTCTCGTCT  
GCGGCAGCACGATCAACTGAGCGCTCAAGAATTCTGCCAATGATGCTCGATTTGCCA  
TCGATCGACTCTTCGCTTGCGCGAAGGTCGGCAGTAACAAGGACGAAGTCAAAGAG  
GCCGCTCATCTTGCCACCGCTGTTGAAACCAAAGAAGTTGGTTTGCAGTGCTTCAGG  
GGCATCGATCAGTTGATCGGTGTGAGCGGCTTCCCATGCCGTCATCGCCTGTTCAAT  
AGCCGTAGCTGTATTAGCCGATGGCAAACCCAATCCCGGATTATCTGTACGCAGCTT  
GGAATAAAGTTCTTTCTTGGCCGCAGCACCGCTAGCCGCCTTGATTGCATTGAATTC  
TGGGAACCCCTTTTGCATTAGCGGAGAGAACATCGGAACCGTCTGATGAACGGCGCTT  
CCATGCAGTGAACGTAACCGCCCCCTTCTGGGGTGTACTTTCCAAGCGCCTCTCGATC  
CTTTTCAGTAAGATCGGCGAATGTGATCTGAACCTCGATATCTTCGTCAATCGCTCC  
AAAAGAGCAGTCTTTCTCTGTAGTGAGCCAGGCTTACCGTTGAAGAACCAATCAAG  
CGCACGAAGCACAGTGGACTIONACCAACCCCATTCGGCCCGATGAAGGTCGTGACGG  
AGTCGAAGGGGATCGTCACGTCTTTCAACGTGCGGAAGTTTTTGATGCGGGCGGATT  
GGATCTTCATTTTCGGTTTCAACTCCTTGAACCTGTTATCTGCTTTTTGAGTTCGTCCA  
GCTCTATTTTCAGCTTCCGCAGTTCGGCATTGATCTCCACCTTGCGATTGAACTGCTT  
TTCCTTGGCCAGCCGCGCCGTGGTCTTATCCAGCTCACGCTGCTTGGCTTGTGCCTGT  
TCGACGCGCGCCACCAGCTCGGCCAGTGTTTCTGTGACCGCGCTGACAGTGGGATC  
AGACGATGCAACACTTGCTCGTACAGGCCGCCAGATGCAGCGCTACGGGCATCGC  
GGTGCCTTCGCTATCCATTGGCAGCCAGTCCGATGCAAAATAGCCCGAGAGCAGCC  
AGCGGCTGGCGTCGGCTTCGTTTCGGGCGCTTATAGGCGGCTACCACCTGCGTTCTGC  
CGTCGAAAGTCAGTTCGAACACAATGGGGAACGGGATAGCCCCGTCGATGCAGCGC  
AGCACATCGGCGTGAGTTCGGGCGTTTTGAGCTGGATGCTGAAGATCTGGATTTCC  
GGTACGCCGGGGCGCGCAGGCAGATGCAGTGTCTCCGGGGCCAGCTTGTACTGCCA  
GATGACCTGTTCCACCTGTTTGACGAACAAGTCTTTGAGCCGGGTGTTGGCTCCGCC  
GTGCTCGTAGATCTTGTTCTTGGGCAGAACGCGCCCCGAAGGCGGCCTGTTTGGGGTA

AGCGATCAGCGCACTCATCCAACCTCCTGAATCACGAGGAAGCTGATGAGTTCGAA  
GTCGTCCAGCCCGGATATGGTGCCCGTGAGCGCCGTGGTCTTGCCGCCGGTGAACAG  
GCTGTCCAGATCCTTTTCTTCCTTCACCTCGATCATCGAGCGGATGGCTTGGTTCAAC  
AGGTTCGGAGTACGCCTGCATCTTGCGGCCGTCCGCCGTGGTTTTGTTGAACTGTTGG  
CAGGCATCCGCAATCGGTTCTGACTGGCCCTTGACGACGAACGCGCCAGGTCGAG  
CAGGCGCTTGACCTCGGTGTGATCGTGGATCACCTCGCCTGCCTGACTGATGTAGAT  
CAGGTAGTAGGGGTGCAGCCGGTTGTGTTGGGGCAAGTGTGCGGGTGGGTTACGCG  
CCGAGCTGCGATTGCGCAGGGTGAAGATGACACCAGGCGCAAGGCCAGGTCAGGG  
TTGGCCGGAACGACGGCATGCAGGCCGTTGGGGGACCTATGCAGTTCTCCATGGGC  
CTTGACGTAGTTCAGCAAGTCCATGCGGAAGTCGTTCAAGCCCAGGTCGGTGATGGA  
GACGCCGGTCTTCAGGTCTTCCAACCTCGATAACTTCTTCCTGCAAGCGGCGCAGTTG  
CTCCTTGCGGTAGGCCATGTCGTTGGCCTGCGCGGAAATGACGTTGTGTCGCCGGT  
GGCGGTCACATCTACGATCATCATCCGTTTTTCGACACGCTCCTTGAGGTTGATGTA  
TTCGTCCAGCGAAATATCGGGCCAGTAGTTCACCAACTGAATGCTGCTATTGGGCGA  
ACCGATGCGATCCACGCGCCCCGAAGCGTTGGATGATGCGCACCGGGTTCAGTGGA  
TGTCGTAGTTGATGAGGTAGTCGCAATCCTGAAGGTTCTGGCCCTCGGAAATGCAGT  
CGGTGCCAATGAGCAGGTCGATTTCCGCCGACTCGTTGGGCAGCACGATGGCTTTTT  
CTTTGGAGCGCGGCGAGAACAGCGTCAGCAGTTCCTGGAAGTCATATGCTTTGGGCA  
ATGTGGACTTGGGCCGGTCACTGCCCGTAATCTTGCCGGAATGCAGTTGCTGGTGAG  
CCAGCAGGTCGGGCGCTAGATTGGCGTAGAGGTAGTCCGCCGTATCTGCAAAAGCA  
GTGAAGATCAGCACCTTCTTGTTGCCGGGGTTGATCGGGTTGGTGATCTTTCCAGA  
ACAAGTTCTTAAGGTGCTGAAGTTTGGCATCGTCAGCGGGGGTAATCCTCGCCATC  
GAAGCCAGCAACGCGTCGATGTTGGCGAGATCGACCTTGAGGTCGTGCTCCCATGA  
CGGCAAGTCCATATCGGCCAGGCTGATCTTGACCTTGCCGCCCACATCGCCGCCCTG  
ATCCAGCCCTTCGAATGGGTCATCTTCTTCTGCATCGATACTTTCCAGTACCTCGGTC  
AGATCGCCCACGCTGGCAGCGATGCCGCTCTGGTTAAATACCGCGATTTTCGCCAAC  
GTGTTCTGGTGATTGGTCTGCAGGGATTGCAGCGTGAGACGGAATGACTGGACGGA  
GCTTTCCAGACGTTTGAGCAGATTGGTCGTCATCAGAGCCTGCAGGCTCTTTTCGCG  
GTCAACTTGCCCTGAATTTTCCTGCACCGCCTGGAACCTGCGTGTCGTACATCTCTCG  
TACTTCCTCAAGCGGCTCGGCAGGATGTAAGTACCAGGGGCATAGACAGCGAGCTT  
GAGCCTGGACAGGTGCTCGAAAATCTCGTTGAAGCCCATCACGTCCGAGCGAGAGG  
TCAGCGCGCAACGGAATGACAAGGGCTTGCGACGCTCAGGGAAATGGCCGATGTCC  
TTAGTGTCGTAGAAGGTCTGGATATGCTTGCGCGAGCGCGCGATGGTGACACTGTCC  
AGCAGCTCAAAAAAGTCGAAGTCCAGTGCGCCAAGGATCGCCCCAGGCGTGCGTTC  
CTCTGGCGGGAGCCTCGACCAGGCATTGAAGGCGGTCTGCGCATTACGAAAGACTT  
CTTCCACCGACGTGCTGGTGCGCAGCTTCTTGCCGAGGTTCTCGGAATCTCCCTCAT  
AGGCCAACGCGAGCTGATTGCGCAAATCGGTAAAGCGGTTGTTCACTGGCGTAGCC  
GAGAGCATCAGCACCTTGGTCCTCACACCTTCGCGGATGACCTTGTTTCATCAGCTTC  
TGGTAGCGGGTCTCCCGATCCTTGAAGGCGTCGTTGTTACGGAAGTTGTGCGACTCG  
TCGATGACGACGAGGTCGTAGTTGCCCCAGTTGATGCGGTTGAGTGGTGTACCGAAG

GATTCGCCGCTGGTGC GGCTCAGGTCGGTGTGGCACAGCACGTCGTAGCCGAAGCG  
GTCGCGGGCAAAGATGTTGGTCTTGAGATTGCGGTTGTAGTTGAGCCAGTTGTCCGC  
CAGCTTTTTTCGGACATAGCACCAGGACAGACTTGTTCCGTAGCTCGTAATACTTCAC  
TACGGCCAGCGCGGTGAAGGTCTTTCCTAGGCCGACGCTGTCTGCCAGGATGCAGCC  
GTTATAGGTTTCCAGCTTGTTGATGATGCCGGTTGCCGCATCCCTCTGGTAGTTGAAG  
AGCTTGTTCCAGATCAGGGTGTCTGATAGCCGGTGCGGTCATTGGGCAACACGTCT  
TCGTGATGTCTGCCAGGAACCTCGTTGAAGATGTTGTAGAGCATCAAGAAGTAGATG  
CTTTCGGGGCAATTTTCCTGATAGACGGACGCGATGTGCTCACAGATTTGGGCGGTC  
ACATCCTCCAGTTTTTCGGGGTCATTCCAGATTTGATCGAACAGACTGAGGTAGGTG  
TTCGCAGAAGGGGCTCGACCTTGTTACCAAATTGGAAACGGCGTTACCCTGGCTG  
TAACCCAGATCGACAGCCGTGAAGCCATGCAGAGGCACATAGGCGCTATAGGTTCC  
ATCGGCTTCCACGCAGGCAAATTGCTGCATCGGCGCCTTGCTGCGGTTGCTTCGAAA  
CTTGGCCTTGCGCCGCATCCAGTCGGCACATTCCCTGGCAACCGCCTTCTGGGTGAG  
TTGGTTGCGCAACTGAATTTCGAACTCGCTGCCGTACAGGCTGCGCTCCCGGTGAG  
CTTGGGGATATGGAATTCCTGCGCTCTTTTCGGATCTTGTCCTGACTTCGTGCGCA  
ACAAAGGTGGGGGAGGTGAAGATGAAGTCCAGTTCGTGATCTTTTCAGTTTCGGA  
CTTCAAAGCTTCGTAGGCATACATCGAAAAGCACGAGGCGGCGATCTTCAGCCGCG  
CCCCTGGCCGGATGGTTTGCTTAAGGTCATCACCCAGCAAGCGACTAATGTTGTCGA  
TCAGTTCCATCGTGCTCCCCTTACGCTCGCCTGATCCATTTTCGCACCTCGCCCCTTGC  
CAGTCGATTCGATCAACCCCTCTGATTTTCATCGCTCGCAGCACTAGTCGAACCATGT  
CCCGGCTCACGCCCAGGAGGCTTCTTCAATCTCGGAAATCGAGAACGGCAGGGTG  
CGCCCCAGAACTTCCGTCCGCACCCGGTCGCCTTTACTGCCACGGCCACGCTCGATG  
GTGCCGACACGCTCCTCGAACTCGCGGTAGGCCCGTAGCAAAGCACCCCAGAAGTA  
ATCAAGCCAGGGTTTGACGTCGTGCTGCCCCTGGTGCCAGCCCTGCGAGCTGGCTTC  
TAGCGTCTCGTAATAGCCTTCCTTGGTGTCTCGAAGATGCGTTCCAGGCTGATGTA  
GCGACCCACTACATAGTCGAAGTGGTAGAGCAGCAGCAAGGTCAACAAGCGGGAC  
ATGCGACCGTTACCGTCCGGGAAGGGGTGGATGCACAAGAAGTCGAGCATCGCCAG  
CGGCACCAGTACCAGGGGGTCGGCCAGGTGCTGATCCAGTGCGGTGCGGTAGTACC  
GGGTCAGATCGGCCATTGCCATCGGCGTCAGGTGCGCAGCGACTGGTTGGAAGCGC  
AGACGCGAAGTGCCGTCTGGGTGACGCTCGATGATGTCGTTGTTGGTAGCCTTCCAG  
CGCCCCGCCGCTGCGGCATATAGCGGTACAGCAGGGTGTGCAGTTGCAGCACTAC  
GCCCTCGCTGAAGGGCATGTGCGCGGCAGACTCGTGGATCAGCGCCAGGGCATCAC  
GGTAGCCGGCGATCTCCTGTTTCGGAACGGCTCTTTGGCGTTGCGTTGCGAATGACGA  
GAGACTTCAACCGCGAGGGCGCTACGACAACACCTTCCAGCCGGTTGGACGACTCG  
GTAGACTCCACCACCGCGATCTGGCGTAGCCCCTTGAGGGCTTCGGGCGACTGCGCA  
GCGTAGAGTTGCTGCTTGCCCCGGTACTCGCCCAGTGTGCGCAACGTGGCGGCCTGG  
TTGCCATCGAAGCGAAGCGCGGCAAGGTACTCGGATGTGAGCGAGTGCATGGAAAT  
GTAAGCCCAGGCTATCTAAAATGGGGTAATCATAGCCATTAAATGGGGCATTGTCTC  
TAAAAATGCCTCATTAACGGTGTTTGA CTACCCCATTTCTGGACACAAGACCGGTC  
GTGAGGGGGCCGGCATGGCTAACCAAGGAGGGGAAATGGGCGACACGAATCTCAAAA

AGGGTAATAAATTAAAAATTGCCCCATTTACTCCATTGTTTACCCCATTTCCCAGGCC  
CAACCTAGGGCAAAGGCAAATGGGAAGGGAACGGCCTTCAAGGGACAACAGCCCT  
ATCCAGAAAAGGAAAAGGCTGCCCCTGTCCATTCTGTTCTGCAACACTTGGCCAATCC  
GTCCCTATGCCGCGCCGCTACCCTCCGCAGCACTCAGATAGTCCGCCCAGTCCTGCA  
ACAGCGTCCTTCTCTGATCCAGCAGCAGCGCCTTGTTGTACGTCGCCCCGCACCTTGTT  
GCTTTCCACGTGGGCAAGCTGCCGCTCAATCGCATCAGGCCGGTATCCATTCTCATT  
GGCCCAGGTCGAAAAGGTCGTCCGCCAGCAATGCGGCGTCGTACCCCGCCCCAGAT  
TCATGTCACGCATGGCGTAGGTGAGTCGGTTGGGCGTAGTGAAGCCCTTGCCGCTCC  
GGTGCGGGAACAGATAGCGCCACCGCCCGTGATGCACTGCAAATCCTTCAGCACG  
GCAATGGCCTGCACAGACAACGGGCTGACATGGTCGCGCCGCGCTTTCATCTTCGTC  
GCAGGCCGACGCCACAGTGCATCCTCAAAGTCGAGCTCGTCCCACTCGGCATCCGCC  
GCTTCCCCTGGACGGCAGGCGGTGAGCGCAATCAACCGCAGACACAAAGAGGTTTC  
CGGATAGCCCCGGTAGCCGCGCAACTCCTGATAGAACCTCTGGATTTGCTCTCGCGT  
CATCGCCGCCTTGCTCTCGCTGAACGGCACGCGTAGCAGCCCGCGCAGGCTGGGAA  
TTGGATTGGCCTCTACCAGGCCTCGCACCACTGCGAACTCAAAGATCGCCGCCAGAT  
CGCCTTTGACGTGAATAGCTGCCCACGCACCGTGGGCGCTTGCACTCTTCAGCAGCG  
GACGAATCTGTTTAACGCCAATGTCGCTCATCGGCATCCCGTCGAATTTGGGCGACA  
GATATTTCTTGATACGGGACTCTTTCGTGCGGTAGGAACCTGAGCGCAAAAACAGGCT  
TGATCTCGGCTAGATACGCCTTCGCCACCGTGGCGAACGAGCTTTCCTTTGCGCGCT  
TGCGTTCCCTCCAGCGCTTCGAGGTTGCGCTGCTTGACCTGCTGTCGCTCATGGGCGG  
GGTGAATACCCTGTTTGACCAAGGCGCGGGCCTTCTCTCGAACCGCACGCGCCTCAG  
CAAGGCTTACTTGAGGAAAGCCGCCAATGGCAAAGAGGTTCTCCTTGCCCTTGACGGC  
GGTACTTCCACCGCCACAGCTTGCCGCGGTTGGGCTTGACCAACAGGAACAAGCCC  
CCGCCGTCTGAAAGTTTCCAGTCTCGATCAGTCGGTTTGGCCGCCTTGACCTTGGCAT  
CAGTGAGTAGATTTTCGGGCATCGTTGGACTCCACTGAGGGGAAAAGTACCCCCAC  
GGTTGAACACGAGTACCCCCAACGCTACCCCCGAATTTTCCGGACCTCGATGAACAA  
TAGGAACGCTCAGCAGACCGTATTGTTTGGCAAGACCTTGATTTAAAAAGACCTGAC  
CAATCTACCAAGCGCTACCAAATGCTCCTGAGTTCCGAAAAATTCGTCAGACGTTGA  
AGCGGAAGTGCAGCACATCGCCTTCCTTGACGCGATATTCCTTGCCCTTCAGCCGCA  
GACGACCGGCATCGCGCGCGCCGGTTTCGCCGCGGTACTTGATGAAGTCGTCGAAA  
CCGATCGTCTCGGCGCGGATGAAGCCCTTCTCGAAATCGGTGTGGATCACCGCTGCG  
GCCTGCGGCGCAGTGGAGCCGGCCTTGACCGTCCACGCACGCACTTCCTTGACGCCT  
GCGGTGAAGTAGGTCTGCAGGCCAAGCAGCTTGTAGGCCGCGCGAATGACGCGATT  
CAAGCCCGGCTCGGTGAGGCCAGGTGCGCCAGGAAGGTGTCGCGATCTTCGTCGT  
CGAGCTGCGACAGTTCTTCCTCGATCGCTGCCGAGACCGGCACCACTTGGGCGCCTT  
CGGTCACTGCATGCGCACGCACTGCATCCAGGTGCGGATTGTTCTCGAAACCATCCT  
CGAGCACGTTGGCGATGTACAGCAC

>CONTIG\_8\_length\_19073\_cov\_7.034994

ATCTTGAACATCCGTATATCGCTTGCTGCTCATAGACACCTCCGAATCGACTATTT  
TCCATGGCCTTGAGATGTCTAGGAAACCCTGGGCGTATCAATCCTATGGCCAGCACT

GTCTAGACGATCAAGGAGGGGGGTGTGCTCAGAGGGTTTCAAGTCGTGTCAGTTCC  
GGAAGGACTGAGTGAGAGCAGTCGTGCGCGGGGCGAGTCGTGCGCGGCAAGACAA  
AAAAAAGAAGTGCGCGACCTCTTGGATCAATTCATCAGCCCGAATGGCGCAATCAG  
TGCGAGCAGCCTGAGTGCGGAGTGGTTTCCCATTTGTTCCCGCCGATGTCTTTATTTCC  
CATTCGCACCACGATGAGGCGCTAGCTTTGCGCTTGGCAGGTTGGCTAGAAGAGCGC  
TTCGGGCTCCGGGTCTTTGTTGATTGAGTCGTCTGGAAGAGCGCTGATGCACTCTTG  
GGCGTGATCGACAAGAAATACTGCAAAACCGACGATGGGAAGCACTTCGACTACAA  
CAAGAGAAATCTATCAACCAGCCACATCCACATGATGTTGGTGATGGCCATCGCGC  
AGATGATGCACAACACAGAAGCGTTTTTCTTGTGAGCACACCAAAAGCATTGTGCGG  
TCGAGGACTTGGATAAGGAAAAGCTCGCGCAAACAACCCCTTCACCCTGGATCTTTG  
CAGAGATGGTGCTGTCCAAGCTCATTCGACCTAAGCCAGTAAACATGAAGCGGCGG  
GTGCTTCTTGAAGCACAGGCCTCAATGGAAATGGCCTTGGACTCCGTTGAGTTGGTG  
GTCGCTCACAAAGTTCCGGTGAAGCACCTCACGCCTATTGATCGGAGTATCTTCAAT  
CGTTGGAGCGCCGCCTTCACGGTCGGCTCGCGCGAGGATGCGCTGGATGTGTTGTAT  
CGCCTAGCGCCCCCAGTTGCTCCACAAGAGATCTAATTTCAAAGGACGAAGCCATG  
AGCTACCGCAACAAGACCTATGTTGCTTTTGCCAGCGAAGACATTCGCTCTTACTAC  
ATGATGAAGGCTTGGAAAAACAACGATAAGATCGAGTTTGACTTCTACGATGCCCA  
TGACCTGTTCCAGGCCCGCGACAAAAGCTTGCCCGAAACCATCAAGGCAAGGCTTC  
GAGAACGGTTGAAAAATGCCAAGCAAGTCGTGCTGTTGGGGAGTGCTCACGCCAAG  
ACGAAAGGCGGCGATGGCGACTCGTTCCTGGCCACGAAATCGAGGTGATCCAAGA  
ATTTGATTTACCGATCGTGGTAGCCAATCTTGATCAAGACCGAAAGGTGGATCGGAA  
CTTCATCCCCAAGCCGCTACTCGATGCCAACCACTACACTGTATCGGTGTCTTTCCA  
ACCGGCGATCATCAAGTATGCGCTTGATAAATATGTGCCCAAATACTCCAGTAAAAG  
GGGCGAAGGGCCGCATGAGTATCCGGCAAGCATCTACCAAGACCTCGGACTGTAAG  
GAGGGTTTGGGTAATGAGTGAACCTTCTTCAAGACATGAAGACGCGACGGTTTTGGG  
GCAAATTTTGACCAAAACCTTCGCGCTCTTGGGCACGGTCACTGCCGTGGTCAAAGG  
TGTTGTCACCTTCTGGCCTGAGCACGCCGATTGGTTTGGGGGCGGAACAATCTTTGT  
GATCGCTTTGGGGTTGTGCGCACTTATCGGGCTGGGGCTGACTTGGCCGCGTCCAAT  
TGAGTGCGACTATGGCTCGCCTCACACAAAGATCAAGATTGTCAAGGGCAATTTGTT  
CGAAGAGAAAAACGACCTGGTTGTTGGGATCACCAACTCTTTTGACACGGAAATTCC  
GCAGATCATCGAGCGCAAGAGTTTGCTCGGCCAGACCATCGATCAGTTGTATGGCG  
GCGACTGGAAGCGATTGGATACGGAACCTGATGATCGCCCTGACGGGCAAAGCACCG  
GTTGACAACATTAACAAGCCCGCAAGCAAGATCTATACGAGTTGGGCAGCGTGGC  
CACGGTGTCAAGCGGTTTCGCGTAGGGTCTTTTTCTCCGCCTATTCCCAGATGAATGC  
CAACAATAACGCCAGCACCAACCATAGAGACGCTGACCAAGAGCCTTCATCTGCTTT  
GGGACGAGGTCATCGCCAAAGGCAACGGCCAGCCGGTAGCGATTACCCCTTGGGGC  
AGCGGACTATCGAGGATCTCGGGTGTGCTCCCAGCACAAAGATTCCATTCGCCTGATA  
ATCTTGACCTTCATGTTTGCCTCCCGAAGGCAAAAGGTCAGCGACGAACTTACGGTG  
GTCGTGCCAGAGTCGATCTTCAAAAACCTTGATCGCTTAGAGTTGCAGGCCTTCTTG  
TCTTCGCTTCGGAGTTCGTGATGAGCCAGGCGCTGGTGTTGCCGGAACGATGCAT

GCGCGTTTTGCGACTACCTCAGTGGCAAGCGCCCTTACACTATCTTGCGCCGAGACG  
ATTGGGCCGCAACGCTCGTCACGCGCGAGCAGCGAGGTAGGCCGCATCTGCTGGTG  
ATCCCGATCGCCACCGAGCAAGTCTTCTGGATCTGCACGAGTCCGAAGCTCAGACG  
CTGATGCTGGCGGTGCGCGATGCGGCAAGACTCATTGACCGGGCGTATCAGCGCCC  
CGGGATTGCCGTTTGGCAAAACAACGGTGTGATGCCGACCAGACCATTTCGCACCT  
GCACTTCCATGTGGCTGGCACGCTCGATGAAGGCGGGACGGAGCGAGGGGAGGTTG  
AGGAGCTTTCCTTGAAGCGACTGAGGCGATTGCCAGGCGTCTGCTTGAAAGCTAG  
CTTTTCAAAGATCGGTTCGGCTCAAACCTCAGACTTAAAAGGAAGCACTGATGGCAGA  
GCTTTGGGAAGTATCGGCGGTTCATTGCCATGCGGGATCTGCAATGGATCTTTGCGCC  
AAGTAGCTACTTGCCGAGTGCCGGCATCAATTTGGCGGGCAATGCCGAATCGCGACT  
CGGTGACCTGGCGGCGGCCATCGGCGATCGCTTCTTCCTGTTTGAGATCAAACCTCA  
AAGTTCTAAGTTTTCTCTGAGTGGAAGGAGAAGGACCGAGGCGGCGGGGTCAAGC  
GCCCCAAGCACGCGTATGCATCTATCTTGGAGATGGCTAAGGCTTGGAATGGTGCTC  
CGACTGCCACTTCGGCACAGGACCAAGTGATTTTCGTCGTTGAGGTGTCATCACTTTG  
CCTATTGGGAGGTTGGTTCTGCGGGCGCTTTGAATGAACAGCTTTGCTTGCAGCCCT  
ATCTGCGCGCCGTTCTGAACGGCAGTTTGCATAAGCATGGGCTGAGCAATGTCATCA  
AAGCGCTACGGGGAGATCTGAGCCTGGCTTACGCACCCAATGGCGTGCTTTCTGATG  
GAAGCGTTGCTTTTCGTCGTTGCCAGGCAACCGTAGGGGCTGCACACCAGAAG  
CATCTCGGGATCGTCGCTAACCAAACGCTCCCCAGTCCTCATCTTTGGTATCCACTC  
GGGCTCGATGTTTCTGAGTTCAACACCTATGTCAAGACGCTTTTGGCAGCTTCACCT  
GCCAAAAGCGAACCAGATCAACACGATGGCCATCTCAACTGGGGGATGGCAACGGAT  
CATGCGAAGCACCGATGATCTTGCTGAGCTTCTTCACGAGCTAACGGTTGTTTCGCT  
CTTTGATCCGGGGGAGCCCCGGTCCTTGGGTAAGACCAGCCGTGTTTTGCTTTCGGC  
AGCCGACATCGATGCCAGCCGGGCTGCTGAAAAGGCCCTCGATCCTTCTGCCAAAC  
CGGCACCAAGAAGTGGTCCAAGGCCACCCTAATGCGATGTCTTGCCAGATGATCGG  
GTGCTGCGCCTGAGGACGTCCTCCAAGTGCGCATCGGCTAAGTTCTTGGCATCGATT  
GGATGTTGATGCAAAAGCGCTGAAACATAGCGTTCGAGCCATACTAAGCTTCGGAA  
GTTTCAGGATATCAGCAGCGCCATGCGGACTCGTTTCGAAGACTCGAACAGCGGTCTC  
CGCATTCTGCAACGGCGTGCCAATTGCCCCGAAGGCCAGAGCGCTGAGATAAGCCA  
CGCGCCAAATGACGGCACTCGGAGCCAGGGTGGTTTGAGCGATGGCCTCAGTTGAA  
TGCTGCACGCGTTCTGTTTCCGCGCTTTGAGCGAAGTTGGACTCCCCCGTCACCAAT  
GATCTGGCCAACTCCGATTTCCAGAGCAGCTTGAGAGATAGTTGCGCTATCAAAGCT  
CGTTGAAGCGTCTGGCTCAGTAGCTGCTTGATGGTGCATGAGGGGGTTGTAGAGACT  
GGTTGCTCCGTCATGGGTGCACCTCGGCGCATGATGGGGCTTGATCTGATCAGAGC  
GCGGCGATTGGTGGCCGTTAAGTGGCAAGTTTGTGGGGCTTCTTGAAGTGATATTGT  
TCATGCCATACATCTAAGCTCGATCGAGCATTTGTCAATCAGCTCTCGGCAATGGCA  
TGTGTCCATCGAGGAAGTCTTGCCAAAGTGCTAACAGTGAGGCCTGAATAAAAAGA  
TTATCACTTGCCAAGCGGCTTCATATGACGGCACTCTTGGCAAACCTGCGACCAACTT  
CTGATCAAAGGGCAGACGCCATGCACAGGGGATTTAGGTGGGTTTGCTCACCGCC  
ACATTGAGCGACTATGACACCGTGGGGCGCATCGTGAGGGACGATCATCAGCACGA

GGTCGATCAAGCGCTCGATCGCTTTGTTGCCCCAGACGGCGTGATCAACGCCAAGGC  
GCTAGGCGAGAACTGGTTTTCTTTAGTAGAGGCCGATATCTTCATTTGCACTCGCA  
CCATGATCAAGACAGCGCGCTTCGCTTGGCGGGATGGCTTCAAAGCGAGCTTGGGCT  
CAAAGCGTTTGTAGACTCAGTTGTGTGGAGGAGTGCTGATCGCCTTTTGAAGGCGAT  
TGACAACGCTCATTGCCTGAACGAGGACAAGAAATTTTACGACTACAAGCGTCGAA  
ACCTTTCAACCAGCCATGTCCACATGATGCTTGTGATGGCCATTGCCAAGATGATGG  
ATCAGGCGGAGGCTGTTTTCTTCATCAATTGCCCCAATGCGATGTCGGCAGAAGGCA  
CGACAAAGAATGGTCAGACCTCGTCCCCTTGGATCTTTGCAGAACTCGGTCTCACGC  
ATCTCCTTCGTCAAACGCGACCCAAGCGCTCGCGTTTAGCGCTCGAATCTCGCGAAG  
TCAAAGCCATGGATAGCGCGACCGTGCCGGTGATGCACGAGCTGGATCTGTCCCAG  
CTCAGTCCCATTGATGCGTCAACACTCACCCAGTGGCGCCGCGTTTCGAGATCAATAC  
GACCATGCGCTCGACGCTTTGTATGCGCTTGTCCCGCCACTGAAGAGGCGCTAGGCG  
ACGAAGTCCTATCGGAACACGACTTTTGCCAGCGGAGAAATTCGAGCAGTGTTTCATT  
CCAGGCGCAAGGACAGCGATAGGGTGTCGTTTCTCGCTTAAGAGATCGCGATGATCT  
AAGAGTTTTAACTGCCCTTGACCGTAGCCAATCTTGATAAAGCAGACACTCAATCCT  
GCCGTGATCTAAGCCCCCTGCTTGAAGGCAATCACGGGCTGGTCTTCGTTCCGTATT  
GACCCAAGATCATTAAATTTGCGGTGACTAGTTTCTTCCCGCGCTACGAGAGCAAAA  
AAGGGCGCGGCGTCAATTTTGTTCGCGAGCAGGTCTATTGGGATCTGCGGCTGAGC  
TAAGGAGCTACAACAGATGTCCAAAGTTGCCATCAACGACGGTAAGGTTTGGTCGG  
CATTCCAGAAGATCGCCTCCGGATTCTTCGCGGTTTTTGGCAGGCGTTTTGATCTTTGT  
CGACTTGCCGTCAAGGCGCAAGCTTCAAATCGGCGTCATGGTTTTGCTTGCGCTAAT  
CCTCGTTTACCTCGTCGTCTGGCGTTGGGCCAACCGCGTTAAGCAGGTGAAGTTGAA  
GATCGAAGGCAGCACGGTGATGTCAAAGTCGGTGACATCTTCAAGGAATGCGACT  
TCAAAGCCATCGCATTCAATGACTTCTTCGATACGCAAGTTGATGATGTGATCATTG  
CCAAAGCAACGGTCAATGGGCAGTTCATCGAAACGGTCGTCGGGAAAAATTTGCCT  
GACCTCAATGCCGCGCTCAATGCCCACAACCTTCGAACCCGATGAGATCGTGGGGCA  
AGAAATAACGCGTGAGAAAGGCCGAAGGATTCGGGTTTCATCCGGGCACAATATTTG  
TCTATGGCGACTATCTGCTCACTGCCTTTGCCAAGTTCAGCGATCAAAATCGCGCTG  
AGCTTACCATGCCCCGAATACCTGGAATTTCTTATCAACTTCTGGGACAAGGTCAACG  
GCGTTTACGCCCAGAAAAGCGTGGCAACGACCATCTTTGGCTCAGGCATCACGCGC  
ATCAAGGGTCATCGGACCATCAGCGACGAGGACTTGTTGAAGATCATGCTCTGGAC  
CTTTCGCATCAGCGAAATGCGCTTCAAGCACCCAGCTAAGCTAACCATCGTCATCCA  
TCCCAGCAAGATTGATGAGATCAACCTGCTGGATATTGCAGGTGCGAGGAATGGTCT  
GTGAGCCTTTACACCCGTGATCCGCACGCTTAGTTCACCTCAAATGATCGGCGACGC  
GCAGCCATTTGACAAGAAGTGCCCTCATGCTAGATCGTCTGGGCAAGCCCGCTGTGC  
GCAATCATCGCTACCGAGAGTGCGCTGGTACCATCGCTTAAATTCGAAAGAGAGC  
GCCCTTGACGAAATTGCGTCTGGCCTTACGGTTGCTCAGGGAGGTGTTATGTATTTG  
AGTGAACCAACGCGACGATGTTGAAATAGATTGTGCGTTAAACATAATCAAGCCGC  
CGTTGTGAGGCGGCTTGATTGGATTGGCTTTATCGCGCATTTGGATTGCCCCGTTTTGC  
GATTGGTTCCTGCTGACAAATGCGGGAAGAGTCGAGGGTGCCCAAACGCTTTCATGT

CTTGGAAGAAGTCCAGGAAGCCAGCTTGAATAACATCGTCATGCAGCGGAATGGTG  
CGGATTGCGCTCTTTCCTTTAGGGCGCTGGCGCGTGACGGAGCCTGTGCTCTTCAAA  
TCGTCATCTACTGTCATACGAATGACCAAACACCACTGGCCTTTATCGCAAACCACA  
TCAGCAATTTTAAGCTGCGCGATCTCGCCAATGCGCGCGCCTGCATAGAGGCCAAG  
AAATGGGCGCCCACTAACGTTGAGGTGTCTCTAGGGCGACCGCGTCTGCGTTGCTGC  
ATTACATCTCGGGCGTGGGCGGGCAAAACGCAGTCAAGACGCAACTCGCTCGAATG  
CATGGTCTCGACGGGCCCAAGGTCATGGAAGCGTTATTCGTACCTGGTCACAGCTC  
GATCCGGATGATTACCCGTTACATGCGGGCGTAGACGGAACTGGCGCGGTCACGA  
TGACCGGATGGATCTCCTCACGGGCATAAATCTGATTTTCAGGGGGCTTCGCGCGAC  
GACATGGCGTCACCTAACCGATTGACGACAGATCCATTAGGATGGACGTGGCGTTG  
GTCTGGGCAATTTTCGGGAAGGCTGGGTGGGCGATGACCAATGTGAGCAAAGCAGAG  
AGCTTCGAGGAAGGGTTCCTTCGAGCAGCACTTGAAGTCATCGCCAAGCGCGATGA  
GCGCAATGCCGTCATCAATGCCCCGAGACTTTCTCTGTCTGCGCAAGATGCTCGATAA  
ATCACTGGGCACAACGCGCTTTACCCAAGCTATGGCTGAGTTTTATCTCAGCATTCC  
GAGGCGTCAGTTCGACAAGCTCAAACGAGAACACGGCAATCCGTTTTTGTATCAGCA  
AGAGCACGCCGAGATCTATCCCCAAAGTGGACCTCTTGACGTGGTATGCGCAAGTC  
ACCAAAGCCCGGGAGAAGATCCAAGATCCGATCTCGGGCAACTTCGGTCGAACGGG  
GAAGGGCATTCCATTCAATTGTGATCCGTGAATCGGCTGGCAAGATCAAGAGCGTGAT  
CTCACATGCGGGCATCACGGGGCTCGACATGAGTGTGATTGAAGAAGCTTTTCAGCA  
AGGCGCAACGATCTTGGCCCTGACCATCGATCAAGCCTTGGCGCTGCCTTGGCAATC  
AAACCCTGAGAAGAGGCGTTGGCGAAACGCCTACCGGTTGCATCTGATGGCGGTCC  
ATGATGCCAAGATGGCGTGGCTGGATCGCCAAGAGTTAGACGAAGACACGAAGCCC  
GTTTAGCGCGGGCGGCCACCCACGTATTGGCTGCCTGGTGCATCCGGGCGCTGGCG  
TTATCGGCGACGGATGAATGGATGTTACGCGATCGTGGCGATTTTCGTCCTGTAGCGA  
CGTGCCTGCGATGCATAGATTGCGTTCCGAAGCTTGGCAAGTCGTCAAGCGCGGAG  
AGCAAGATGAAATACACCATCGAGATCAATGCGACGGTCCAAGTCGCCCACTACAT  
GAAAGTTGAAGCAAGCTCGCCGCAGGAGGCGCTTGCTCAATGCGATGTCGACACGA  
TTGCGAACAGTGAGTTCGATTTTGAAGAATGGTTTAGCGCACCTGAGATCCATCGCA  
TCGAAGATGAAACCGGCACGCTCATTGCGTGTGACTACGAGGACCATGTTTCTGACA  
TCGACGATTTGTGAGTTCAGTTTCTGCCGATCTAATCGATGGGTGCCATCACGCTTG  
GACTTGACGGAAGGCATGATGGCCTTAGATTGAATAGAAGGAGACGAAATGGAACA  
GGCAATTAGAAATAGTATTAGACAGGCAGTGAAGCGGGGAAGCGAGGCATATGTGC  
AGTCGCTTTGTGCGGCTCAGGATGATGCTGATGCTGCAGCACGCTACGCCATTGAGG  
TGGCAATCAAGAGCGGCAAAGAAGGCTTGGTTGATCAACTGGTGCCACTGTTGTGCG  
AAGTCGTTTGCGGTCTATCCGCTTGATGTGGCTGCCAAGGCGGGTTCAGCGCGGGCA  
GTGGAGCAGCTCATGGTATTTTTCGACGCAGAGGATGACGAGGCATTGGTGCTTGCT  
GCCAGGCACGGGCACACGGAGTGTGTCAAACGCCTGCTCAAGGAGTGTAATCCCTT  
GCAAGGCGATTCTCAGGCGCTGTATGAGGCAGCGCGTCATGGTCATGCGGATGTGG  
TCTTTCAATTGGTCCTGTTCTCAGATGCCAAGGCGCAGGGCAGTCGAGCGCTGATCG  
CCGCTTGTCGAGAGGGTCACTTGGAAGCGGTCAAGCATTTGTTGCCTTTCTCATCGA

AGATCCAATGTGCGCTGCATGGCTTTGCGGCGGCGGCCGAGAACAATCATGCCGAG  
GTCGTTGAGTTCTTGATCGAAGCTGGTCTTCCAGATCCGGAAGACACGTTTTTCGTTG  
GGTCTCAATGTTGCTGTTGCCAAAGGCCATGAACAGCTGGTGCGGACGATACTTTGG  
GCGATCGTCAGAACAGGCCATGCGCCGCGCGACTTTGGCGAGAAAGCACTGTTTCG  
TGCAGCAACGAAGGGCGATGCAGGAATGGTCAAGTCGATCTTGGAGTTCGCCCACA  
AGACCACCTATCCAGAGGCCGGCTTGTTTGCTGCACTCCAAAATGACCATGATGAAG  
TGGCGGATGTTCTGGTTCGCCGAGTGAACCTAGATCACGTGCGCGAATTGATCTCGG  
ACGAAGAGATCGAAGCCAAGCTTGATGAAGCGATTGCCAGACTTGACGCTGCGAAG  
CAGCACAGAGAGCTTCAATCCAACGAGCGCAAGAGATTTGCGCAGAGCAATACGTC  
AAGTTCAATAGAGAACAGCCCTGCTCGCGGCGCACGCTTGTAAGCGAGTGCTGTAG  
AAAGACGCCTGGATGTCATGGGCATCCTCAGTCCGTTGCTTCTAAGGACCTACTTTT  
CGTATCTCCCAATCGCCACGCGATAGGGTTCGGACCTGATGGAGGTCAGTGTCGTAG  
ATGGCGATCAGGTCAGAGCTGCTGGCAATGATGTGGCCTCGGATCTTTCGCTCACCC  
TTTTCCCAGAGTTCTGAGTCGCCTCGCGATACAGGACCAAGAAGGCGATGCTTTTCT  
GTGGTCGCCTCATCTTTACCAGCATGCTCGCCGAGCAAACCCGGCAGGATCGCTACC  
AACAGACCGACGAGAAATAGTGTAAGTGCGAGATAAACTCCCGAGGCAGCGATGCC  
GGCCGATGAGGAAATAAGCTTAATCCATGGATGTCGCAGGAAAAATTCCTTGATT  
GACCTTCGCCAACTGGTCGGGTGGGCAACCGGTAGATCAAACTGCGATCCACACA  
AAAACAAAGGCTGTTGCTACGGAAACCCAGGGGAAGGAGCGAAACATTCCAAGCC  
CTTGCAGCACGATGGCATAGTAGCCGCGAACAACCTTCCAGTCGGCCGATTGGGGA  
AATAGGTCGGCTTGAACGCCCCAGGCTTTGAGGTAGCTGGTGTAGGCAACATGTCCG  
CATCCGTGAAGCACGATTCCAGCCAGCGTCGTCATGGCAGCTAGGCTACCGACGAA  
GCGTGTGATGGACCACGACCGTCTGGAGGACGCACTATCCGGGTCTTCTGGTGACGA  
GGTGGAACGCTTCGATCGGACAATTTTCGGTATGGCGCATGATTCTCGTAGTCAATCA  
ATTGCTGGACAAGAAGGTTTTCCGTAGCCAATCCATTGCTTCATCGAGATCGAGGTT  
CGAGCTGGCATAGGACACTTGAAGCAAGTGAGGCGAAAGCAGACTGTCCCATTTTT  
GGCTGGCCAGATTTTTTCGCATCTGCCAATAGCACTTCAATAGATGGGGCTGGTGCAG  
TGGCAATTGATTTGAGCGCTGTCTCGATGTTCTCAAGGGCATTTCGGACCCCGCGTGA  
TCTCGACCCCCAGTCGGCTACCCTGAGCCTTGAAGTTCCTGGCATTGAGCAAGCAAG  
CGATTGCATCGTTGGCCGCATCGCCCAGCCAAGTGAGAAGCAGGATGTCGCTTCCCC  
TATCCAGAACGAGTTGATCATCCAAGCTGTGTTGCTGGTAGCTGGTCCGTCTTCGT  
CGATGAAGCGCTGCGCACACGCATCCACGAACGTCGGCGTCAGTGTTCCCCTATAG  
ATCGCTCGCATGGTTTGACGCACTTTGGTATGCACGCGTCCGCCGCCGCCGCTGAAC  
AACGGTGGCGCGCCACTTTTGGTGGCAGACACATAGATTGTCTTCTGGCCTTCGTG  
ATTTGCTCGACCAGCCAGGTGCGCCACCAAACAAGATACGCTGGCCGGTCGTGAG  
CATCTGAGAGACGGGCAGGGTGCCAAGCGGTTTGCCAGCGGCGACAATCCGAAATT  
CTTCGTCGACCGTGAACGCTGCATAGAACGAGTAGTGTTGACGATACGGTCACCG  
ACAGATCCGTGCAACAAGAGCCCAGATCCGTCTTGAATCAAGATGTTGTGCTGCCCC  
AAATGGCGCAAGAGCTCGACAAACGCATCACGAGACACTTGATTGAAAGGGGCATT  
GGGGGCGCACAGCAACTGGAATGCCTGAGGTGCAGTCAGGCCGCCATACTGCGCAA

TGGCGGAAAGGAGCTGCTGGATGAAGGTGGAAAGATGCGCACCTTTGACCACAGGC  
GGCTCATACCATTTTTTCGGTGAGCAGCATGACTACGGCCAAAGTCTGGAAGGTGTCG  
AGCCTCAGGCGTGTTCTGAAGATCCGCTTGCGAGTCGATGGCGTCTTCAATCACATAG  
CCGCGCAAGATCGCAGCTTCACCTTTGCGTCTTCCGGATCTGCCCATGCGTTGACGG  
AGACTGGCAACGGTAGGGGGCGTTCCAATCTGGGCAACGCTCTTGACCGCGCCGAT  
ATCGATGCCAAGCTCCAACGTGTTGGTGCAAACGGCAGTCGCTGGCTGATTCTTTTG  
TTTGAGCGCAGCCTCAGTGTCGTAACGGATTTCTTTGGAAAGACTGCCATGGTGAGG  
CCAGAACTCGCGCGAAACGCCGCTTTTCTCGCAAAGCTCATTGAGCAGGTGTGTATA  
GCGCTCGACCTCACGGCGGCTGTTGGGAAAGACCAGGTTGTTGCTACCTCGAAGGAT  
TTTGAACAAATGCTCGGCCACAGCCAATGGTGCTAGTTCTTGCTTCTCCTTCTTGTC  
TCAGCTTCGCCCTTTTGAGGAACAGGTTCTTCAAAGCCTTTGATGATAAGGAGAAGT  
TCTGACGCATCGGAAGGGGGCGTCGACAATCGCGGCGGTGCCCGCTGGACGCAGAAA  
GCGCGCCGCAGCCTGCATGTCACCCAGTGTTGCCGATAGCCCAATGCGAGGCACCTT  
GCGTCCAACGACGGTATCGATCCGGTGACGCAAGGATTGAAGTTGTTTGCCGCGCTC  
GCTGCCGATGAAGGCATGTAGCTCGTCGATCACAAAGTAGGCAAGGTGCTTGAAGA  
TGCCGGCAACCGAGGTGCCTCGATTGCATAGCATCGCTTCCAGCGACTCTGGTGTA  
TCAGAACGACGCCATGTGGTTTCTTGAAGAAGCGTTGTTTGCTTGTGCTGCTGATGT  
CGCCATGCCACGGCCACACCGGAATGTCGAGGTCTTCGCACAGTCGCTCCAATCGAC  
CGAATTGATCATTGATCAAGGCCTTCAAGGGGCTGATGTAAACGATCAAACCTGCTG  
GGGTTTGCTGTTCGAGATACGTCAGCGCTGGGAGAAAGGCCGCTTCCGTCTTCCCCG  
AGGCGGTGCTAGCAGCCACGATCACATCTTGATCGGCAGGCAGGATCAGTGGGATG  
GCCATTTCTTGACATCCCGCAGGGCTTCCCATTGCTCTGCCCACAAGTAGCGCTGG  
ATGCCTGGCGAAAGAAGAGAGAAGGCGTTCGACTGGCTCATGGATTAAAGCTTGAA  
CGAAGCCAATTCGTCATCCCCTTGAACCGCGAGATCTTCGTCGCCGCCATGGTCTTC  
TTTAACCTCAACCTCGCCGATCAACGTTTGCCAGGCCGTGCCAGGGTTTTGCTCCAA  
GACCGCCAACAGATTGATGAACGCCGTGATTGTAGTGCGGGGCGTGCGGAAGAAGC  
TGTCACCAATCCGATTGGCGCAGTGCTCCATGAATTGCTGGATTGCTTCGTCAGGCA  
GCAGATACTTATCCGCATCACCGCCTGCGTAGACATGACGGATCTTGGTCAAAAGCA  
CATAGAAGTCTTCCGCAGTGAGGCTCGAAAGTCGCACTACAGGTCCAGAGAAGTCG  
ACCAGACCTTCTTGCAAAGGTGTTTTGGGCCAAGCGACTTTGAAGCGCTTGGTAG  
CTGTAAACACCGCGCCGGGTGTCCATCAAGAATTCCGGTGTGCCACCCAACACGAA  
GCCAAGGCCCACTGCCGTGCCTTGGAAGGAGTCATTGAGCATGCGCAGGATCTGCT  
CATAGTTCGAGTTGCGTGCCTGTGCGTTGGCAAGCTTATAGAGATTGACGAGCTCGT  
CCAGGCACACCAGAAGGCCGCTAAAGCCAGCCAGGCGCACGAAGCGCCCCATCAGT  
TTGAGCTGATCGTAGACCGAGGCATCATCGACAATTGAGCGCACACCCAGCGCAGC  
TTTGGCATCGGTCTTGGTGGAGAACTCGCCACGCAACCAGCGAATGGCATCGGATTT  
GAGTTGCTCATTGCCTTGTTCAAAGCCCTTGCAATAAGCCGCAATGACATCAGCGAA  
GTCATAGCCGTTAACGAGTTCCGTCAGGTGCTCAAGTTTGGCGCGGATGATTTGCTC  
GGTGGGAACATCCTTTGCTTTGGCTTCGGTCTTAGCGGTTGCGATGAATTTTTCAACC  
ACTCCTGACAATGCGCCACCGTCCGGCTTTGTGCGGGTAGCCAAGTTGCGCATCAGT

TCCGCATAAAGCGAACGGGCTTGGCCACCGGAGGCATGCAAACGCCGATCGGGATT  
GAGGTCCGCACTCGCCACAACAAGCTTGCGCTCCATGGCAATGGCACGCACGAGGT  
TGAGGAAGAAGGTCTTGCCAGCACCGTATTCGCCAACGACCAGTCGGAACGAGGAG  
CCGCCATCGGCCAAGCGATCAATGTCGCTGACCAACGTTTCGACTTCGCGAATGCGC  
CCAACCTGGATCAGGTGCTGACCCGCACGAGGCACAACACCTGCACGCAATGACTG  
GATGACCGCATCACGATCTTTGGCACGAATAGGGTTGCTCATTGCTCTATTTTCTCGA  
TGAACCTCTGGGTTGATCTCCACCGGATCGTCTCCTTCAGAGAATGGGATGTCATAAG  
CATCAAACGATGCATCATTGATATGCTCAAGTGCGCCGTCGAGCATCAGCTCCAGAT  
CCGAAGCGCCATCTTCCAGTTCGGAGCGCGTCCAGTTGGGTCGGGAGAGCATGAGG  
CGCAGCAGTGCGCTATGTGCTTCATCCAAACCCAACAGGCCAGGAGTAGAAGCAGC  
TTCTTGACTGGGGAGCGGCAGTGCTTGGGGCTCGATGATGGGCTCAGGCACATCCTC  
GGTAAATATGCCAGCCAAGAGGGCAGAGACCTTGGCGGTATCGTGTTGGAGTTCGG  
CAATACGTTTGGGGTCCAGGCGAAACCGCTTGGCTGGCTCTACCTTGGTGGTGCTTC  
TTCCCGCGCTCACGGCATGGACGTCATAAAGACACGCTTGGTCTCCACGCCGAGCG  
TCTTGTAACCTTCTCCAAGAAGCGCATTTTCGTCTGGCGAGACCGTGCCGTCACCTT  
GCGCAAGGCTTGCCATTGAGGCCGCGATTGTTTCCTTGGTGGTTTGATCCAATGGAT  
CAAGCTTTTTCTTGAGCGAGGCCAGGGTGATGGGTGCTTGGCTCAGCCACACAAGAT  
GCGCACGAAGGCGCTTGTGGTCGGCGGGACTGAGGTGACTCCATGCATCAATCTCTC  
GGCCAAGATGTTTCGATTTTCGTGTGCACTGAAATCGCCATCAGCCTGCGCAACGGTGG  
AAGCAAGTTGCAAGGTCAACAGTGCGATTTGATACGCGCTGCTTTGGGCTTGATGGG  
TTTGGCCGGGCAGCAACGCGAAGAGGACCACAGGATCAGTGTCGCCAGGCGCTCGC  
GCGCCTTCGAGCACATTGGGCTCCATGCCGATGTGAGCCGCCTCAAGCATCCTGGCA  
AGGTCTCGGATCTTTTCTCGGTTGAGTGATGCCCCACCATTGCCGAAGCGATCGGCA  
AGCTCGCTCAGCGGCAGGGTGATCGCACGGCGTTGAACCTCGTCCACCAGCAATTG  
GAGCGCTGCTTTGCGCGGGGCAGGCCAAATACTGGTTGGCAGGTGTAGCAAGCCAT  
CCAACGTATTCCGAGCCTCGGGGTTCTTGTTGATAAGGCGACTCAGCGGGCCGAGTT  
CATCCGTGCATTGCTGGACGATTTTCGTTGAGCTTCTTGATGGGCCCCGGTGAGCGCTG  
TGACATCGGGTGTCTCGCCAAACGTCTTGGGTTTGAAGCTGCTGCCATAAAAGGCAG  
GGGAAAATGTTTGTCTCGAAAATTTAGCTTGGTGCGGTTCTTGGGCAGGACCAACC  
CCGCGTCAAAAAGCTCCCGGTAGCGCTCAACGAAGAGCTGATCGAATTCTTCAGCG  
CAGCGGACAGTAGGAGTGCGCATGGATACTTCTGGGCTGAGGCGTGCCCAGGCAAG  
GGCCAAGGGTGCGGGAACCGGGGCACGATCCAAGGAGCATTGACCCAAGGCTAGG  
CGGAGGTAAAACGGAAGCTCATGGGTGCGCTGAAAGCGGGGAAGCGGCTTGGTGTA  
AAGTTTGTCTCAATGTCATCGAGTTCCATCCAGTCGAGCAAGCTGTTGGTGTAGCT  
TCGAATTCGTCCATCGGCTTTGCCGTAAACGGCATCGAGTTGCCTGAGCGTTGCTTT  
GATGACTGGCCAGTCCTGCTTCGAATCGGGCTCTCTGACGCCATCGAGCACAACCCG  
CCTTTTCGATGCCATACAGAAACCGGAGCACATATGTGCTGTTGCACTCGGGATCGGA  
TCGATCAGAAGCCAGCCAATTGATGTAAGCGCGGCGTTCAGTGGCAGATAGGTCAG  
CGTAGCTTCCCCAATAGCCACTTGGCTCGCGATAGTCGCCAGTTGCTGCAACAGAAA  
GGCGGCCATTGACCAAGCTCGGTTTCGTCTCCGCCTGTTGGCGTAGCGAGATTGATCC

CCGCGTAGAACAGCCCACCTGAGATTTCTACCTCACGAATTTTCGATGATCTCGCCCCG  
GCTGCACCCAACGCGTCTTCTCCAGCCCCGAGGAGGCTTGGGCACCAAGAATTCCT  
TTGCAGGTGCACTGCCGGCGATGCTGGTGCGATGAAGTTCGTCCGTGGCGTTTCGCCG  
GTTCGGTGCGGGAGGCCGAGGCAACGGTGGCGGAATGGATGACACCTGTGTCTCG  
CTCGTCGGAACAGGAATAGGCGGCAATGCAGGTGGCAGTGCTGGGATCGTCTCAAC  
TCTTTCAGCAGTTGGCGTTGGTTGGCTTGCAATCGGCACGATCCCGCGTTGGTCTTCG  
AGTTCGGCGCCGGCCGTAGGTTGAGCCTGCCGAGGTATGGCCGCTTTAGCAGCGACT  
GCACGCATGGCCTGGAGAAGATTGCTGTTCAAGTTGCTGCGGCGATGACGGGGCTTCC  
GTAGGTGCCGAGGCGATGGTTTGCGCGTCTGGTGTCTTGGTTGTTTCTAGATCGCTT  
GGACTAGGCGAAGCAGTTGGGCGTGGGCGGCTCGGGGTGGGCACGATGATGCGCGG  
AGCGTCTGATGCGGCATCAATGGCAGAGTTCGCTTGCCGACTGATTGATGGTTGCTC  
AGCCACAGCGCGCATTGCTTCAAGCAAATTGCCGTTGGGCTGCTGAGGGACGGGAC  
GATCTTGAGGATTTCCGGTGGCGCTCGGTTCCAGTGCGGCACGTGTGCCTGACAGAA  
TGATCGGAGACATTTCCGCCTGCCCCGGGAGGGGCAGGAGTCGGTGGTACTACTGGT  
GTCGTCGGGCCGTGCTCGGCAATGTGCGCCATCGCGGTCCGCAAGTTCCCCGGTCGG  
TCGGTTGCAGCAAGAGCTGAGTTCTGTGGCGGCGCCACCTGAGAAGGGGGGAATGA  
TTGGCTCAACGCTGCAGTCGGTTCCACAATGCGCTCGCTGGCAACCCGGTTGCTCTG  
CGAGGGCGATGGAGCGATCGGTGGTTGAGCGGCCTCTAGCATGGAAGAGAGGATCT  
TCCGATTGGCGCTAGCGGGATCAGCGGCTGTAGAGCCACGAGGTTTGCTTTGAACTC  
TCTTTGTTCCCGTCAGTTCCGCTAGGGTGGGCTCACGCACGATGGGGGCGGGCGGCT  
TCTGCTGCGCTTGCCACTTCACGAAGAGATAAATCCCGAAAGCGACCACAACAGTA  
ATGCCGATGGCAATCCACACTTGCTTAGGCACCATCGCGATGACCGCTAATGCGATC  
ACCAATGCGATCACGGTAAGGTCTGAGCCTTGCTTTTTCTGCGTCTCGCCACGTGG  
CCCCCTGCCTACGGCGTCTATCCTTATTCATCTTAGCGCTTTGAAAACACGCAGGGT  
GCTCTCGGCTGGCTGCTAGAAATTGAGATCGAGCCTGCTTGATTGCTATCCTAATCT  
CAGGGATGGGGGGCTAAGATGGCGCTTTACAACGATTTTTCTCGGTTTGAGAGATGG  
GCGCGAGATCAGCTGGCGCCCCGAAGCAGTCTTGAAGATCTGCGCTGTGATTGAAGC  
TAACCTTGAGCAAATCGCGCGAACGACCCACGCGGGCGGTCAGCGCACTCGGCTCA  
TCACGCCTTTGATCCGTGCCAGTCTGGTGCGCCCGCTGCCTGAAAGGGCTGAGACGG  
CAATAGTGGACCAGTCAGAGCTGGGATGGACACGCTTGTCAGGCTTCAACTTGGG  
CCGTTTAGGGGTTTCCGTCGCCAAGAGGTTTTTGAAGCTTGATCATCGAACTGTTCTTG  
TCTTGGGTGCCAATGGCTCGGGAAAGAGCAGCCTCTGTGAAGCGCTTGAACTTGAC  
TTCTCGGACGCATTGAGGAGGCCGACGAGCGTGCAATTGGATTCTCGGCGCTACTTCG  
ACAATGCCCATGAAGGCCGTCATCAGTTGCCCCGTATTAATTGCTAAGAGCAACGGTG  
CAGAGCACCAGGTTCAACCAGACGAGGAGCGTCATCGGTTTCATCATCATCGAGCGC  
AACCGAATCGAATCATTTGCGCGCATCGGCGCACGAAGGCCAGCTGAGGCATCGTC  
CATGCTGGCGGCATTGTTTCGGTCTCACTGCGTTCAATGATTTTCGTGGCAGGTTTTGGT  
GGAACTTGGACCGGCAACTCAACCTCGCTCTTCCCAAGGCTGCCGACTTAGCGCAG  
CGACGCGTTGCGATCCAGGCCGATGAGGTCAAGATCGCATCCGAAGCTGCCACACA  
CGCTGAGTTTGATAGGCACCGGAATCAGGTGGCCACCGCTTTTGAGCTTGGTCTTGA

CTATTTGGGTCTGAAAGCGCGAATTGGCACTGCACAGACCCCGGGACGGCTTCAAG  
AGATTCGTGCGATTTTGGCGACACCTTTGGCTGCCGAAACGGGAATTCGTCCTGAGC  
ACTTGATCGCTTCGCGTCGAGCACACCGTGATCTGACCCGAGAGCTGGAAACAACA  
CAGGGAGCGCTTGCAACACGCGCTCAAGAAGTCTCGTATAGGGAGTTGTATCACTCT  
GTCGTTGCGCTCCAAGACGCACATGCAGATCGCTGCCCCGGCGTGCGAGACCCCGCT  
GGACCAAGTGGCTATCAATCCTTTCGGTCGGGCAGCAACCGGCTTGGCGGCACTCG  
GTGAACTCTCCCAACTTGAAGCAGAAAGTGAGCCGGTTGGAGCGACAGGTGGACCGA  
AGCCAAAGCACGCTAGACATAGCGCTCCGCCGAGCGATCGAACATATCGCTAAGCT  
CCCCAACATCGGCACTTTGGCGCCAACGGAGCAGCTGTTAGCAGATGGAGATCGGC  
AAGGTTGGCGTCAGCTACTCACGGCAGCGCGTGAGCTCAAACGACTCGACGAGAGT  
CTTGTCGTCAAGAGGGCCGAGCGGCAATCCTTAGAGGCAGAGGTTGAGAGGCTGCA  
AACGGCCAGGACGCAATTGGCAAAAATTGCGGGTCAGCAGAGCCAGTTCGACGCAG  
ATGTCGCGTCAGCTAAGGAGCGGGTTGCGGCGTTTGGGAACCTCTGAACAACGCAC  
CGCAGATAAGCGACACTACCCCCATGTTGAGGAGTGATCCATGCAACTGACGTTTCG  
GTGACGCTGAGGGCCTGGGCAAGCGCAAGCAGACTCGCCGGGAGATCTTC

>CONTIG\_9\_length\_19063\_cov\_64.551225

CTCAAGGTCGGGCCCAAATATAAAAACTCTCCAGCCTCTGGCTGATTGGTCATCAT  
CGATTCCATGCGCTGCGCTCCATCTCTTTTTCGTTGCACCATCTCTCCAGAGAGCTTA  
CCTGCTTTGAAGTTTGCTCGGCACGCACCGACCCCGCGTTTCCAATGCGAGGGGCCT  
CATCACCTTTGGGTGCCCCGCCGCTTCTAGATCTTCCCTGGTAGTGCAAGACGTCCA  
CCCGCCCCGTGCTGGACTACTGGAATTGTGTTTCGCAGTTGCTCGAATGCTCCTAGCA  
ATCCATTGACAACAAAGGAGCAGCCGGAAGTTCGTGAGGTTGCTGCGGCAACTCAA  
GCCCTCGGAACTCTCTATTGAGTTCACCTGCCAGCTGATCACGTCTTGCAAATCCAT  
AGCTTGACAGGTGAGGATTCTGAAGCGAGAACAGTCTCCAGGCAGCCGGCCAACACA  
CTAAAGAGGTCGGCGCGGATCAGCATCAACATCACGTCGTCTTGGGTCCAACCCGG  
GCCGATTCTGCGATTGAGCTGCGGCGTTCCCCCGTGCGCATACTTGTGGAGCCACTT  
AGCAGCGCCTCCTTTTTTAAACCCATCCACTATGGCTTGGATGGCCGGAAACGTAGA  
GGTCAGTTGAGCGGCCATGTCTCGCAACATCGGGACATCATCGATGGGGTTGTCAGA  
CCCATCCAGTTGAAGGCTCTGAATCTCCTCGAATGAAGCCACGTAGACGAACCAAA  
AGCCAATCGTTGCGGCTTCCAGTATAGGACGCAGCAACGCAGCCGCAGCGCCGTAT  
TCGCCCCGCTCAACCACACGAATCAATGCCGAGTGGTGCTCCAGTGCTAAATCGATG  
GCAGATCGAGCAAAGTCCACTCGCAACGAGCGCGATGCCTCCTCGGGCAATAGGGA  
CCTGAAGAGTTCGTTCTGCTGCCGCGACTCAGCACAGCGGCTCAGGATAATATTGAG  
AGATTCGGCTTCCACGGCTTCTCGTAGCGCAAGCAGTTCTGTTCGGTTAAGGGTGCCA  
GACCACGGCCGCCCTGTCCCTAGCGAGCCATTCCAAAAGCGCATCGCATCGCATTCC  
ATGACGCCCCATATGCGCCCTACCTTCGAATAACTGATTCCCGTCATTGCCGCCCCC  
GACTCATGGATATCGCGGGTCTCGAACTCTTCCACGACGGCGATTTTCGCTCACCAGC  
CAGCCATATGCACCACTCAAGGCAGGTGAAGGGGTGGGCTATGCCACCCCCCTTGC  
CGCCAAGCTGGTGTGCTGACGCCCCGCCGATGACCAGATGGTTCGAGGACGCGGATGT

CGAGAAGCGACAGCGCCTGCTTCAGGCGTTCGGTGACCTTGCGGTTCGGCTTCGCTGG  
GCTGCGGGTTGCCGCTCGGGTGATTGTGAAACAGGATGACTGCGGCAGCGCTGAGC  
TCAAGAGCGCGCTTCGCCACGACTCGCGGGTGGACATCGCACCCGTCGATGGTGCC  
GCTGAAGAGGTGCTCGGTGGCCAAGATGTGGTGCTTGGTGTCGAGGAAGACGACCC  
CGAAGACTTCGTGCGGCAGGTGGGCGCAGCGGGCGACCAGGTAGCTGCCGGCCTGC  
TCGGTCTTGGGTGCGCTTCATAGGTTCTTCTCCACCAGCGCGTTGTGCGCCTCGTGGG  
AACCGACAGGCGAAGCGTCCGGCCCTACCGCACCCGAGAGCGAGCACCGCGCAAGC  
GGCGCGCAGCGGAGGGCCGCAACAAAGCGCCAGCGACGAGGAGGAGGCTTGTCTT  
TGTGGTTCGGGACAGCGGAGCTAAGGTCCCTTAAGAGGTTTCAGCGCTGAGAGGACAA  
GGCCAATGGCGCAGTCCGTCCACCAGCCGCTGACACCCAACGTATGGACGCATGCA  
GGGCAGGATTGATGGGGCTAGCATCAATGCCTTCGCACGTGGAAGTCATATGACCG  
CCCCTCTCTTGACGTGAACAACCCGGCCAGTTGGCCCCGAAGGGCTTCAACAAGCC  
ATTGAGAGACTGCGCCCCGGTGTTTCAGGGCTTGGGAGCAAGACCTCCCCGAGAAAGC  
AGCAAAAACGTTTCGATGAGGCGATGCAGCAACTCGGCGACGTCTTGAGTCCGTTTCG  
CCATTCGCGGCTTCCATTTACCCGCCTGACGGATTGCGAGGCCGAGAAGATACGAA  
GCACGGGCTTGAAGGCGCTGGGCCCTGACTTCATTGAGCGCCGACTTGCGGGCTCAA  
GTCGAGCAAGGCACCCTAACCGCGGACCAAGCTGCACGCCTCCTCAAGACCAATCA  
AGTCCGGGACGCCAATCGCGTCGGGAAGGCTTGGTTCTGCTTCTACCCACCCTGTGA  
CACGCACGAAAGCGGCGTGAGGCCTCTGCTGGAGCACTGGGGAGGCGAAGCGCTTT  
ACAACCTCAACGCCCCGAGATCCCGTTCTCGGTCCGGTGCTGCGCTCTATTGGCAGGC  
CTGCCCTAGTCCAAGCCCAAGTCCCAGCCATCTATTTGCGAAACAGCTTCGGTCTAG  
CCGCGGCGGTTTACCAAGCAGATCTGGCCACCTTTGGCATTGAGACAAGAGACGCC  
CCGGGTTCGGTTTGAGGATTACAGCCGGTTCGATCTCGAGCCCCGACCGAATCGAGCA  
CATCTTCCTTCACCCGCATGCTGATTTTCGTTTCGGCTAACCAAAAAGCAACAGGTGGTC  
TTGGACTCCACGATAACGTACACCTCAGACCAACGCTTAGATCCGGACGACGCGTT  
GCTTATGATTTTCAGGGCCGTGCGGGCTGAATCTCAATGGGCGTCCCGGGCCTCTACG  
CCATCGCTGACAGCGCTTACCAGAGGGTGTCAGAGGCCAGGTAGTTAAACTACCCG  
GTCAGAGAGGGTGCAAGGACAGCGCCCCCTCCGATTAGCAGGCCTCAGCTTCCTTTT  
TTGTGCTTGTGAGGTTTGAGCTCAGGCGTGTTTCCAGGCGTATCTTTATTGTCGCGTC  
GACGTTGATCGGGCTTCCCGGTAGAGGGCGCAATCGGCTTAGGGCCAGGCTTAATC  
GGCATAACTTGACTCCTGCAGGATGGGGACCAACCGTTTAAAGCTGCGGCGGAGCC  
TCCATACATGTCAAGTTAAACTAACAAAAATTTAATGGCGTTTAGTTTTTCATTCATTT  
TTACGTTAGGATATATGCCGATTCCGACGGCCTCTGATTTTTTTAAACAGTATGGTTTT  
GACTACGCAACCGCGAACAACACTACCCCTTTAAACCCCTTGCTGCGCATAGGTTCTGT  
CAAACGAAATAGATCGGATCCGCAGGCCGAGGAAGAACTCCACTTGGTCGTCCCTG  
GAGTTTACATCAGGAAATAAAAAGCTGTTCAATTTTGATTGACGTTTGAGCGGTTTCG  
TCGTATCCCTACTTCCATTGTAAACAATGGAAGCAACGCAGTGACTCATCCACTTGA  
CGACATCATCAGCAGTTACATCGATACACCCAACGGCGGCCTTGTCTTGGAAGGGAT  
CAAGATTGGCCGAGTAAAGTTCGAAAAGATCACAATCACCAACCGTGAGGGCGCGT  
TCAATGCCCAGGACCTTATCAACACGGTGTTGAGCAAGACTGCCCCGCATCCGGAGT

GGCAAGCATGGCACGCGATACGCCGAGCTGCTGCCACCCGGCAGCCCTGCACGCCT  
CCTGTCTATCGAGATCGAAGACTTCTCATTACACCAGCGCCGTCGTTACTTGAAATC  
CGCCACCGTCAAGGACTATGCCCCGGACCTTAAACCTGCTCCTGCTGACGTGCGGGCGA  
CATCCCGGTTTCTCGTATTGACCACACCCATGTTGAGCGCCTGTGGGACCTCTTGCG  
ATGGGCACCCTCCGCTTTGCTGCAGGATCCCAAACCTGCGCGCAATGACGGTCGACCA  
AGTGATTGCGCTGGGCCAGGCCACCGGTGTGCAAGGCGTGTCTCACGCAACACTCA  
AGAAGCACAACCTTTGCCTGACCAACTTCTTCCGACGCCTGGTGGCTACCCGCGCTA  
TTCCTGGAAACCCCATGACGGCGATAGGGAAGATCAAGAAGAACCTAGTGACCGAC  
CCAAACCGTGGCAAAAAAGCCGAGCGATTTTTGGAGGAGGCAGAACTTCAGAAGAT  
CTTCGACCCCAACGCGTTCGTCGCTTGGGCCAAGAAATGGCCCCATCGCTGGTGGTG  
CCCCATCTTGGCCCTTTACAGCGGCGCGCGTGTCAACGAAATTGCGCAACTCAAGGT  
CCACGACATCGTGAACGAGAACGGGATCTGGTGTATCGCTATCCAGCTCACGGTCG  
ACGACGACTTGGCAGGCAACGAACACTTCCAGACACGCCAGACAGTGAAAGGAGC  
GTCGGCCCTCCGTCGGATTCCCATCCATCAAGCGGTGCTTGATGCCGGCTTTCTCGA  
CTTCATCAAGGACATCAAGGCATGTGGCCATCCGCGGCTGTTTCCCCATCTCTCTGC  
GGGCGTCTGCGAGGCGTCGGGTGAAACGAATGCGCGCTACAGTCAAGGCTTAGTCA  
TCCAGTTCAGCGCCTACCTCAAGAAGCTAGGCTTCGGCAAAGGGCTTGGTTTTCATG  
CCTTTCGCCACACCCTTTCCACCAAGCTCAAGCATGCCCGGGTTCCTCAGGAAGACG  
TGGCCACGATTACGGGACACTCCGAGAACAACCGGTTCCCTGTGTTGAACCTCTATC  
AGACCACGGAGAACCCCGAAGAGCGGGCCCGCCAGGTGGCGGGCGCTCCAACGGTTC  
AACCACCGGTCGTGCTTCCGAAATACGAGCGCGGTCAAGTCAAGAAGCAGCTGGG  
CAAGGATGCGAAGTTCTACCCGTAGTAGAGTCGCACACATAAGATTGGGCGTTGGA  
CCTTGCAAGTCATACAGGTAGTTCAGGTTTGCGGCTTAAGTGGAGCGTGACAACAGAG  
ATGGACAACCTGTTTTCCCAAGCGACGCCGCTGCTGATGTTCCCTCCTTCCCGGCTTCC  
TATCAGCTTGGATCTTCTACGGTCTCACTTCACACCCCAAGCCAGCCAGTTTGAGC  
GCACGGTCGAGGCCTTGGTCTTCACTTTTGTCGTCCACGGCGCTACGAAGGTCCTCA  
AGATCGGGCTTCTTGCGGCCGGCAAAATACAGAGCTTCGGGGTCTGGACCAGTGAC  
TCTCAGACGATATGGTCGATATTATTTGCTGGCCTACTGGGCGTTGGGGTCGCCGCC  
GCGGTCAACAAGGATACGTTTCACTCTTGGCTGCGCGGCCGAGGTTTCACTTCTCGG  
ACATCGCATCCAAGCGAATGGTTCTGCGTCCTTGATTTCGAACCCAGCCTTCGTAATC  
CTTGAGCTCCAAGATGGCCGCCGGCTCATGGGGTGGCCAAAAGAGTGGCCCGTAAG  
CCCATCCATTGGACAGTTTTACATTCAGGAGCCTGCCTGGATCACCGAAGGTGGAAC  
GTTGGTTGAACTAACTACCCTCGATGGCATAATCATTACGCAACCGATGTCCGCTG  
GGTCGAAGTATTTCCCTAAAGAGACGATTGAAGATGACAAATCTGCGAAAGGGCTCG  
AATCCTCCGCCGCCGGGTAGGCAGCACGTCTTTGACAATGCCAACCCTCCAACCCGC  
AGCGCGCGGCCAGCGCCGCCGCCGAACCCGCCGCCGCCGCAAAGAAGCCATGAAA  
ACTGCGCCCCAAAGCCCCGTATTGGGGCTATTTGCCGCTGAAGGGCGTGGACAGAT  
CTGGCCGCTATGAAGAGCTGCCAGCCATTGCTGTGCAGCACTTCTACGTCGCGTCGA  
CCGGTATCCCTTGATGAGTAGCTATACCTTAGAAGATCACGCCAGAGCAGCTGAAGC  
TCTCTCTTTGTTAAGAACAAGGAAAACAACACTACTCGGGCAACAACCCCAACAAGTT

CCGCGCAGACATTGAAAGAGCTAGGGCCACCCTGATCGCAATCGAACTCGCACTAA  
AAGAAGACGGCACTCTTCAGCGGACTCCAGAGGAGGACCGCGATGCTCAGCTCGAC  
CTAGCGTTTCCAAACGCCCAGTCCAAAGAGGTTGTCACTTGGCAGGGCAAGCACTTC  
ATGAAGTGCTTTACGCCTACAAGCAAGAGCCTTAGCGGAAAGACTGTTTTCGGCTGG  
AAACCATATTGGAAAGAGCTCGAAAGCTGATAATCAGGCTGGTGGCACGGTCGTGC  
GATCCACGCCCCGCTTCGCCCAGCCCACGATGAGTGTGGGCACCACGATGACAGGA  
AGCCCCACAGAAACGCGACGTAGAAGGCAGCGGTAGCGAGCTCATAGTAGACCG  
GATGCTCCGCAAACCTTCAGCCAAGCACGGCACAACCGAAGACGATAGCAAGCCCC  
AATCCGCCGCCACGAGCGCCCCCTTTCAGAAACCCGCCCTTTCGCGAAAGTAGGGAAT  
GTGGCCGGTCCTGACGTGCCAAGCCCAGACATGCTGGGCACGAATGTGCAACATCA  
GGCAGAACACCAGGAAGCCGGCGATCAGCAGCCCCGCTGCGCAGTAGACCAAGCCC  
ATCAGCTGTTGGGTTTTGAAAACAGCGTCGAGGCCTGCTCCAAACAAAAGCATGCC  
AAAGGCCCCGAGAATAACGCAGGGTAGGATCATGGCAGCCGGCCCCGGTCGGCGCATA  
AAGCCGCGGGTAGTTGCTTGGTGGTTCATTTCTTTCTCTGCTAGTAAGCAACACC  
AAGCGGCGTACGGCAACCGCCTGGCAACTGGTTGCCCAAGGGGGTTCAGCCCCGAG  
AAGTTCCGTTATCGCTCACGTGACCAATTCCCAACCTTCGCCCGCCGGCCGAAACT  
TCATCGTCATCTTCAGGCGCATTTCTTAGCCTTCGGCGTCGTGGGCTGCCCCGCAAT  
GAAGCCCAGTGCATCGACGATCCCGGAGACCCGGCAGTCCTGGTCACCGTTGGGCA  
GTTTTGTGCAAGAAATCTTCAGCCCCGCTCGCTTCTTGACTTCGAACCGCCAAGTCC  
GCTGAAGCGTTGCCTGCCTCCCCTGCTCGGTAAAGAACCGATCTACCGCTTTGACCG  
CGTCCTCCTTGCTCGGCGCGTGCTCTGCATTACAGGCCGACAAGCCCAACGCCAAGA  
AGCACGCTGAAATCCAAACACGTTGAATGGTCCGCATCACGACTCTCCCTTCTTCTG  
TTTGGTCAGGTCCACGCCGATGACCTCGTTTCGGTAACCCACCTGGACACGTTTCGAC  
GTCCACCTCAGCGCGCGGGCCTCCGTTCTCCAACCAGACCCGCTTGACGCTGAAGAT  
GACCAGATCGTCCTTCGCATCCCTGCCCTGCCGGAACAACCCGGTTGCCTCGCTTTC  
GCTCATGTGGATCGGAAGATGAAAGTGCCCGGCATGCTGGGGCGTCCAAACAGATC  
GCTCACTGCGAGCACTGGTCGGGACAAACCCCTCGCCCCGTGATGCCCTCTACCTGGA  
ATCCGGTGATCCAAGGAATCGGCACGTAGATGTCCAAGATGCCGCGTTGCCGGTCAT  
AGGACGGCTGGTCCACGATGTTGGGGCGAAGAGCAAAACGCTGGATGCCGCGGAAG  
CGTTCGGCCCCGTGCATCGAAGGCAGCGCCATACTTGCGCTCAATGGCTTGCGGCTGC  
TGTGCGGTGATGCCATTCGGGCCATTCCGTTTTGTATCGATCAGCCACTCGCCATAA  
AAACACTGCTCGCGCTCGGCCTTGCTCAACCGGTAGCTGGATCGCGTCGATGCAATC  
AGCCTCGCGTCACACGTGTGGTAACCCGCCGAGGCCGTGGACGCCAGCCCGGCTCG  
GATGTGTTGCGCGCCCCGCTAGTTCGTCTTGGTCGAGGTCCCAGTAGGTGCCACCGG  
GTCGAGATAAGGGCTCTTGGTCCTCTCCGTTGATGCCTGCGGAGCCCCGGTGATGGC  
CCGCCAATCTGCTGAAGAAAATTCCCCCTGTCCTGCGCTTGCGCTTGCACTGCCAT  
GCTTGCTGCCAGGACGCACGCGCCCATGACCGCTGCCCACTGCCTCTTCATGCCCTG  
CTCCTTGCGCTCGGTTGCGACATACTTACGTGTCACGTAGAGTCTACCCGTGGCGTA  
AGGCTTCCGTCATGCTGTTTAGATGCCTGCACTGCATCGATTACGCCTGTGAAGCCC  
GCCACTCCCGCCCCCCCCGGGATGTCGTGGCCGCGCGCCTGCGCCAAGCCCGCGAACG

ACGGGGCTTGAGTCAGCGCGAGGTAGGGATGCGAATGGGCCTGGACAAAGACACA  
GCGTCAGCTCGGATATCCAGATATGAATCTGGAGCCATGTCTATCAGCCTTGAGGCA  
TTGTTTGAGATGGCCGAAGCGCTTGAAGTGCCGCCCCTTTTTATTGGCCAGCAGC  
CCTGGCATGGGCGACGCAATCATGGCACTGGGGGAGCAGAGCCATGGTCAGCAAGA  
GCAACTGGCAAAGGTCTTGGTGGCGCTATCTAAGCTGGAGCCCAAGGTGCGTGCTG  
CGCACGTCCAGAAGCTACTGAAGCCAAACGCTGACGACTAGCGGAACCATCGAGGC  
GCCCCGAACCAGCTGCGACAGCGGAGCCACGTGCTATACAAGCATCTGGCACGGAG  
GCCTTGGGGGGCCTGAGCATGGGACTTTATCTACGTAAAAGCGTGAGGGTTGGACCT  
CTGCGGTTCAACTTGTCAAAGGGCGGAATTGGCGTCTCAACTGGAATCAAGGGGTTT  
CGAGTCGGAACCTGGTCCGCGGGGCAACTACGTGCACATGGGAGCGGGTGGAATCTT  
CTACCGCGCAACCTTTTCCTTTGGGAGCGACACGTTCTCGCCCCGGGACCCCACTCGG  
CCCCATTCGTCCCGTCTCTGGCGCCAGCCCTCTCCAGCGTCACCCCGACAATGGCC  
TGAGATTTTCGCGCACACATGGCCCCGATGGTCGACATAGATTCGGCCGACGCGACCA  
CGATTGTGGACTCGTCCTCGCAGGCGTTGCTGGAAGAGCTCAATGCAAAGAAGAAG  
AGATGGCGAATTTGGCCAGGCGTCGCTGTGGTTTTCGGCACTGGTGCTTTTGATTGCG  
ACTGGCAACGAAGCACCAAACCTGGGCGCTGGTCATGCTGGCTTTCTTCAGCATAGGA  
GCCATCATCGCAGCGCATTGTAAGGACCAACTTCGGAAGACGGTAGTTCTGATGTAT  
GAGCTGGACGAGCCGATGGAGAAGGCGTTGGAAGCACTCCACGCAGGAGCCCAAA  
CCATGGCCTCCGCTTATGCCACGTGGCACGTGTCCTCCACGCCAAGGTCTTCGACC  
GGAAATACCATGCTGGGGCGGGAACCGTTGTTGACCGCAAGCCAACACGCTTTGCC  
TCAGCACCGCCCCCATTTGTCAAAACGAACATCAAGACCATCGCCGTCAATGTCGGA  
GCCAGGCACTCCATTTTTTCCCGGACCGCGTTCTGATCTACGACGTGAATGGCGTT  
GGCGCGGTAGGCTACAAAGAGCTACAGGTGCTGGTGTATCCACTCGCTTTATTGAG  
GATGGCAGCGTTCCGCGTGATACAACAGTTGTGGATAGGACGTGGCGTTACGTCAAT  
AAGAAAGGAGGCCCTGACCGCCGCTTCAAGGACAATCGGGAGCTGCCGGTATGCCA  
ATACGAAGAGGTCACCCTGCGCAGCGACACCGGCCTCAACGAGCTACTACAGATTT  
CTCGTCTAGGATCAGCCGCTGGGTTTCGCCTCAGCTATTGCGGGCCTATCCCGAGTCA  
TTCCTAGGGAGCTGCCCTAGCTATCCCTCTGTGAGCAATGCCTTTTAAAGAACCCC  
GGCAGCCCTAGCGTCCGCTGTCTCTGTGAGAAATCTTCCACCGCGGCACTCATGGC  
TTCCTCCAAAGACCTGCGACGAGCCATCGCGGCCTGTGCGCATCTGGAGAATGGCACT  
GCGGCCGGCCACTAGGTCTGCCTCGATTTGGGCCCTTCTTGCTTGAATGGTTCGATCC  
AGATCCGCGACCTGCCTGGGGTCGATTGCTGAGTTCGGGTTGAAGTGGAATCGTGCC  
TCTTTTTCTGCGCCACTTCATAAGGCGGTGCGTCAGCGCGGGCCCAAAACCCCGGA  
ACGTTTAGAACCGCATTGCGATTACATCTGCTGCCGTCTCGATGCCAAACGATTCC  
AGCATGACTTTCTTCGCCGCCCCAATGCCCGGAATGGTGGCTCGCTCAATCTCGAAC  
TGATCCAAGAAGTGTGCGTGCGATCTGTTGCGGATTGCTGGACAGCGCTCGATAA  
CGCTTTTCTCGTTCCGCCTGCAGACCGGCATGCTCATCCCGCAGCGGACGAAGCTGA  
TTCTGCTTCGCCTGGAGCTGAGTGTCCGCTTGCTCTTGCTTCCATCGAGCGACGAGAC  
CGTCGTATTGGGCTTTTCGCTTGCTGATAGCCGGACGTCAGTGGCGCTAGATCCGCGC  
GGCCACGGCTATTGACCCACGCGCCCATCGCCCAGCCCAGACACGCCACACGGGG

GCTAGCACCGCAGAAAGCGCGATGCCAAGCACCACAATAAGCAGCCCCACCAGCCA  
CCCGGTCGTTTTCCAGAAGGTGTGCCTGCGGCCCAATGCTTGAATCTTGGGATTGGC  
AGGCACTGCCTTCACCTGATGCAGCGCGTGCATGGGTGGCAACACTGCCGCCGTGAT  
ATCTCGCCAGATCGCATCCAGGTTGAAGGGGCCTGAGGCCAGCTTGGGGATGACGA  
CAGCTGCACCGCCAAAGAGCGCAATACCTGCGCGTTCAATCGGGCACCACGGACAC  
TCAGTAAGCCCATCGAAATAGAAATGGGACGGCCTGGAAGAACACCGTTTGAAGTG  
CTGCTCCAGCTTCGTCAGGGCCTGGACCCAATCTTCTGCCTTCGGCCTCCCACCAGG  
CTTCGCCCCGTGCAAGCCAAAGGCTTTTTCCCAAAGGCCTGCAACCCAAGGCGACGC  
TGCGGCCCGGCGACGCACTGAGCGGCGGAGGCTGCATGCGGGTGCGCGTAGTGTCTT  
TGCCGTAGGCGTAGCGGAACTCAGGGATCGCCTTTTCGATTGGCATGTCGCCCCGGCC  
CACTGTATCGGCCAGCAAAGGGATGCCGACCGTTCATGAGCATCTGAAAAATCAGG  
ACGGCCAAGCCGAAGTTGTCATGGTTGGCGGTTCTGTGTGACTTGTTTGAAGGCCTTT  
CCGTGGAGCTCGGGCGGCGTAAAGTCTTGGACGCCGACCTCACAGAGGAAGGTGCG  
CCCCTGATGCGAAATCTGGAAACTGTCTGTGTGATCAGCTTCACTGTGCGATCCGG  
TGACACCCGCACGCCTCCGTGATTGACGTCACCAACCAAGTGACCTGCTTGGTGGAT  
AACCGAGAATGCTCGCGCAGTGTTCAAGGCGGCACGAACCACTAGCCTCCAGTCTG  
CCTGGGGAAAGTCCGCCAAGCGGCTTTTGGGGCTGTAGAGCTTATGAATGTCCTTCG  
ATGCGCGAAGGTTGGCCATGACAAAGCCACAGACCTTGCCATCGGATTGCCGCGAGC  
ACGTCAGTAGGCCAGGCAGTGAGCTGATCCAGCGCCGTAGTCCGAAGGGCAGCCAT  
GGCCACCAGCTTGTCGGCTCTCTCACTGCTTACCGCAGCCAAATAGATCTTGGCAGC  
CGAGTCCGGCCTCCCCTCGACCTCGAAGACCGTCCCCTCACCCCCCTTGCCCAGTTG  
CTTTCCCAGCCGGACCGGTCCGGATTTACCAACCAGAGCAGGTGAAACCACTTAGG  
CGTCCTCTACTGGCGCCGGTGCGTCTGGCAGCTTCGTCAGCCGGCTGGCAAGCAGGA  
GTGTCTTGTCGTCGTCCGTCCGCTCGCAGATCACTGGCGAGGCAAGATAGGCTTCCA  
GCTTAGAGGACAAATCTTTGCTGTAGCCTGCCCCCTCTAAGGCACGGACCGGCGCGA  
ATATCTTGTCGAAGAAGGGCGAATGAACGCTCTGCGTGGCTTGGTGGAGCACCAAG  
GCTTCGATGCCATCGGTGAACACCGCGACCTCATCCACCGCGCCCACATTGCAGGAA  
AACTCCGCGTTCAACACGGCAGCCGGATCGGTGACGAAAACGGTCGTGTTGATGTA  
TTCCCCGTGCTGGGGCCAAAACACATAGGCCCAATCATCGCCGCGAGGGCGAATAA  
CAATGGCCCCGTCGCCCACCTGGAAGAAGCATGTATGCGTCGGGGAGACGATAGCC  
GCCACCAACGTGCAAGCATACTCTCTGACCTCCAACCCGTCCGCCGTAGCCCTGTGC  
GCGATACGGGGCCGTAACGCCGGCTAGCCAGTTCAAGACCACGTCCCGCGTTATCTCT  
TCAACGCCATGGCCGTCTTCAAAGTGGTTGCGCACACAGTCCCGAATCTCCAACGTC  
GCTAGCTTCGCACCGGTCTCTGATTGAGATGCACTTCCCGCACCATCCGACGCCACC  
AAGAGCACGGTGCCGTGCTCTGGAAAGAATTCCTGTTTCATAGGCGTCCTGGCAGTCC  
GTTCCAAACTTGATGTGGGATGTGCCAATGGATGAGGCCGCAACGACACGCCAATC  
CTGGAGATCCATTACACGCTGGCCCAGCCGTCCGGGGCTGCGGGGTTGACCAGGGG  
CACATTATCTCCAGGGGTCGAACGGGACACCGCGCTCATGGAGTTGGACAGCCACT  
TGAAGAGTTCCTTGAAGTGGAGCCCCCTCAGATGCAGCGGTGCGCGCGTCGAGATTT  
GGCCGAGGATGTCCATGTCAGCCCCCTGCACGCCAACCGCGAAAAACTGGAAATTC

TTCGTTGCCTCCCCTTCCCGGACCAACGCTGCAGCGCGTTGCCATGCGTCGGTCGGC  
GAACCATCGGTGATGAGAAACACCCAAGGTCGGTAGTAGGAAACGCCGTTGGCTTT  
GTAGATCTCCTTGCGTTGCCGAACCATCTCCAAGCCTTGCTCAATCGCTGCGCCCAT  
CGGGGTGTCCCCAGTGCACGACAGCACGGGAGGATAAAAGCTGTCTGCCGTGACAA  
AGTCCATCACGGTCTGGACCGGACCGAAGGTGACAATGGCGACCTCCACCCGCTTG  
GCAGCGAGCGAGTCCGAGTTCAGTTCTTCCTGAAACTGCAGCAGGCCAGCGTTGAG  
CTGCTCGATGGGCTTGCCGCCCATGGAACCTGATGTGTCCAGCAGAAGTAGGCACG  
CGCACCGGTTCTCGGGGTTTTTCGGCAAAATCGCTGGCGCCGAAAGGCACCTGTTCAA  
AATCGTTCATTACGCTGGATCTCCCTGTCCAGTGGCTTGAAGCGCCATCATAGCTCT  
GCTAATCAACCCAATCTATGATGGGCCATGGTGACTCGCCCTACCCCTACCTCATTG  
CCAGCTTGGGCGCCGCAAGGAGTCGCGGATTGGACTCCCTTAGCGGTTTCCGCAGTG  
ATTATCCTCACCATGGTGGCGGCGCTAGCACTTCGCCCTGCAGATGTAGAGAGCGTG  
CCAGATAAGACGACAGTCGAAACCGCAGCGAACTCATCAGTGAGTCCTCCGTTGAA  
CGCAGGAACCCCTGCTTTTTTCGACCGCGCGCGTTGGTTCCCTAAGGCTGGTGCCAC  
CACTCAGCTGCCGCCGGTAAAGCAACCCATGCAGGCGGACGAGCGATGCCCTTTGT  
CGTCGCTGCCCAACCCATCCCCCGAGGCCAAGGCGGCTATCAATGCGGGCTGGCAC  
GTCAGTGCGGACATGACGTTCAAAGGGTTTCGTTTCGTCATGGTAGACGCCGGCGCG  
AAGAAGGCTTCCGCTGGCTGCGTGGCCATTGGAGCCAGCGCTTTGGTATTCAATGCC  
CACGGCCTCATTGCCATTGCTTACGACCGAAACGCCAAACAGTCGTCCAGGTTGAGT  
TCGTAAACCATTACGGAATCTGGTGCCTTACAGCTCGGAGCCTTGAAAGGACCACTT  
GCTGAGCTCAGTGTAGTGACAGCAAATCGCTCTCAAGTCGATAGCCACGAACAA  
GTCGAAACGAGCTTCGCGGGGCGCGTTCTGGGTCTTCGGGCAGCTGAGCGGGATGCC  
GACGTTCTGCTTGTGCTGTATGCGCAGTTGACACAATAGTCGCTATCCAAGGTTCA  
AGAAGCGGGGACCGCCACACGCAGTTCATTGCATACCCAGCCTTAGTTTCAATTAACG  
GACGGGCTCATCGTTTTTCAACAGCGGCAAGCTATCGAGCGGGGCCAGAATCGTCAC  
ATATAGTCTCGCTTCGCGACGCGACTAAAAACCCCTGCATTTTTTACTCTTGACAAATT  
CCCATAGGCACATAAAACGTCTTAACCCTACACACCAATCGACCCGCCATGAAAATT  
CACGAGTTTTGGACGAGCGCTTTCCTCGCCTCCCTGCAGCGCGTGCCTCCAGTCGAG  
GCACGGACAGAGGCAGATGCCGCCACAGAAATGTGCATCTCAAAATGGCAGGAGC  
ACATTTATGACTGGTCAGAAGACATCGAAGTCAGGTGGCAAGACCAAGAGATTGCT  
GAGGTGCCATTTATCACGCCTACCCAGCAAGATCGCTAGGATAACTTTTTCCAGAA  
CCTCTCCCCAACTTCTTGCTCGGCGATAAAGAAAGGTCATCACCACACGGCGCCGGC  
TTTTTTCTTGAGGCCAAGTAACTTGCCAATGCAGTCAACGCCTCCCTCATGACTGGTT  
CACCGATAACCATCTTGATCGCACCCCCATTTGCGGGGCTAAATATTACGTATGAAA  
TTGGCATAACCCGGAACCGGATCTCCAATCGCATCAAGGATCTCTATTGAGCAAACCTG  
ATATCTGATTTTCATTATCAAAATGTATGGGGATGCAGGATTTTACAAATCGTGTA  
TTTTCTCTTTGGCCGACTTAATTCCAGTCTCTGATAGCGCTGACCTCCTGACACCCCT  
CATCCACGCCCTAAGATCCTCAGGCGAAGGAACAAAAAACTCTGATCCTAGAGCAT  
CCTTAGTGGCTTCAAAGTTTCTATCACATTGCCAACAAATGCTGGGATGCGACCACT  
CGATAGCTCGGCAGCCATGCTCAATCGTCCAAAGACCATCATCATCTAGACCTCTCA

TCCGAGAAATGAATTTCTCGACATCTTCGCTTTAACTCCCATGAAATGTGACCTCA  
AAAGTCCTTACGCACACGTGCGAAGCCTTATAAGGCGGCCATAGTAACCATCGATAT  
ATCGAACTTCAGCTTTTGAATTCCCGCTGAGGCTCCTACCAGTCCGGTGAGCTTTTCT  
CTTGCAGTGAAACTTCGGCTGTAGGTCGAATGATGCTCGTCATCGAGTTCATGGCCC  
ACGATCTGCGCACGGAGCTCTGACACCACTCCAGCGCCCTGAAGCTCTTGGATGAA  
GGTCTTTCTGAGGGAATGGAAGCCTCTTTTTGTCAGGCTCCCAACCTTTTCCCACCTCA  
GCCAGGTGCCGACTGAACGCCTTGGTGATCCAGTTGCCCTGCCCGTTCACCGCCGTG  
GCCTTTGCGGCAGGAAACACCCTTGTCTGACCTGCCTTGCCTTCTCATCGATCCATT  
CCAAGAACCCCATTTTTGAGGAGCTCGGGATGGAGGGGCACAGTGCGAATGCTCACC  
TCAGTTTTTACCTTTTGGTGCTCGCCCTCGTCCGAGATGCGGACGCATGGGATGCCGT  
CCTCTTCGAACACGTCTTTGACGAGGAGCTGGCCGACCTCCGATGCCCTGGCACCGC  
TGTAGAGCCCAATGAGCGACGCCAGCGTGCCGATTCAGACAGCTTGGCCAGCGCT  
TCGGGCGCGAACAGGGCCTGGATCTGTGCACGGTCATACGCTTTGAAACCCAACTTC  
TTCCGGGCCCCGCTTTTCGCGCTGGGAGTAGCTCACGTGGCCGGAGGCCGGGTTGTGC  
CCCTTCGGGTAATGGCCCGACGCCATGGCCCATTCGAAGAACCCGCCCTTGCCACCA  
ATGTAGCTTTGCTTGTTCTGTGAGCGTCGGCGTGACGCGCCTTTTTTCGCGCATATCTT  
GATACCAGCGCGCCAAGTCCGAGCGAGTGATGGCATGGATCTTCATCGCAGGTCCC  
AGGAAGGACACCAGCGCTTCAATGGCGGTCTTCTTGATCGTGTAGGTCTTGGGCAAC  
GTCGAGCTCTTGAGCGTCGCCAGGAATGCGTCACGGGCTTTGCCAGCGTCATTGTT  
TCGATGGCCGGTGTAGAAGCCTGCCTTACTGAGCTGGGGTGCGGGGCGGAGCCGAA  
CATGGTCGGCACGGCACCTGGGCCGGCTTGAGCCTGCAAGGCAGCGCCGGCCATAG  
CCTCCAGCTCCATCAGCTGCCTATAGAGCTTTAGGTCTTTGGGACTGTGCATCTGCCA  
CTGCTCTGTACACGTCCCATCCGGCTGGCGGGTGCGGTTGAGCGTCAGTTCCTGGAG  
ATTCTCGGCGCTCGTCAGGCGAGCGATGAGCAGGTCAGCGTCCGTCTTGCTCAGCTT  
GGTCACGCGTTGATCCTTCAACTGTGCGAAGAGCCGAGCATAGCCCGCTCCAAGCA  
CGACCGCACGCACGTGCGCCTGCGCCAAGTCCTTCGTTTGGAGGGTGCGTTTGATAA  
GCCGGCAGCCCATCACGGTTTGCAAATCGACGGGCACACGTTGGACGAACGACCAG  
CGGCCGGTGGACGACCGGCTCAAATGATGAGGTATGCGCATGCGAGTGTTTCCTCTG  
CATGCTTCCTGCCTTCAATCAACTCGCCTAAAAAATGATTATTTAAATCAATGATT  
AGGAGTGAATGGCGGAGAGAGTGAGGATTCGAAGTAACGCCCCCTAACCCACTGATC  
TGCAAGCAAAACACAAACCGGATTGTGTCCTGGTGAGTGCCCAGGATTATAGAGGC  
CAACATTGCGAATCACCAGCAAGGTTGGCCTCCATGCTCGACATTCGTAGGACTCCG  
CACCTTGGCCGGTGAAGGACTGTCTCCACGGCACAGACGTAGATGCCCCGCCCGAG  
CCCGCTGCCGCCTTCGGATAAGCAATCACGGCGCTGGAAAAAGAGCACATCCCTCG  
CAAATCTTCCCAAGCCAAGAAGGCGGATAACTCGCCATGAAGACAAGGGTGGCAAG  
ACAATCGGCGTCCATCCTAAGACATGGAAAGCGATGATGACTCGGCGAGCAAACC  
GCTTCCGTCTTCCATAGGCGCGCTTGAACCTTACCAATGCGCCGGGCAACATCGCCGT  
CTGGCTTGGCCCTGCCGCTCAAACGCTTGGCAAGCTCATCAAATGCATTGGTGGTGC  
TGTCGAGCTGAAAACGACTGGACCTTGCTACGCCGCTGATCACCAGGGGCGACGATC  
AAAGCGCCCAGACAAACCAGTAGGTCTTGCGTCAATGATTGCTTAGATACAAGCGC

TGCAATTGCAGCGAGTGAAATCGGAATGCCTAGGAATTTTCGTTGCGTTATCAACAAC  
AAGCCCATTGAGCTTGCCGAAGAAGTTCAACTCGGCTTCGGCGATATCGCGAAGGA  
TACCGTCAAACGAGAGCTTATCGACCACGCACTCAACATCGTAGGCAAAGCGCTCC  
AACACTTTTGGCCAACGCTGGACCAACACAGCAAATCTGCCTTCTATGTTCGGACTCG  
GTCGCCAGGACATCGGCCACACCCAAGCGAAATAGAGCCTTGTATTCTTCGGTCCTG  
ACTTTTCCCTTGGCGTCTTCTTCTAATAGGTTCTTGAGCAACCCCAGATCAGGCGCTG  
CCTGATCGAGCATCTTCCTTGTTACGACGGTTGTCAGATCCAGCGTTTCAGGCCCCG  
ATCCACCGGAAGCTGCCTTGACGAAGATGAGATGCGCCGGACGCCCGGAATGGCC  
GCAAGATCACCCTCAAACCTGAGGCGTTTAAGGAGTTGAATGAATTCACAAAGCGA  
TTGCAGTCTCCCAAGCTTGGGGGGCTGCTTATGCTCCTCGCTACTGTTGCTGAGGAA  
ATCGCTATCGAGCAAGTAGAAATTGCTTGGAAGTCGCCTCTGTGGATGGACTCGCA  
ATCCGTCAAAAATTCATCGAACGAGCGATAGAAGCGTCCAGAGTCATTGGCTGCCA  
ATGCCCAAGTGAAATCCACTTCATCGCTTTCAACATCAGGGCCATCGTCAAAGTGCC  
CGAAATCCGAGCTGAGTTGCTTACAGCGCTCAATGATCGCACTCAGCTCAGGAGAG  
ATTGGCCCTTGATACGAGAAGCGATGCCCCTGCAACGCAGGGTAACCAGCCAGACG  
ATAGAGCGCGACAACATCAGCGAACATCAGGAAATCTCGCCTCGTGCGCGAAGCGC  
GTCTTCAACGCCGTCGATCGTTGACTCGGGAAGCTTAGTGAAAGTCACGCCCTTGT  
ATTGGGGTCATAGATGATTTCCGGTATTCTTTGTGCCTACACTGCCCGTCTCAAACCAG  
AAGCTCCAATTCGAACTCTTGGCCTTGATCCGAATGTGGGCCTTCAACACTTCGCGA  
CTCAGCGTGAACTCTTCAGGAATCTGACACTGTTTCGGAATTGAGAAATTCTTTGAGC  
ATGTCTAGATGCACCGCCTCTTGCGGCCTCACTTTTGCTTTTCGCCGCTGCACCACCT  
CGTCGAGCACGACCGGCTTCTCTTCTGGGAGCGATTGAAGGTAGTCAACGATGCCCT  
GTTTGATTTTCAGGATGCATGTCCCGAAGGTTATCGTTGTCGCGGACGAACTGCCTGA  
CAAACTTTAATAGCTTAGTGGTCAGCTGTGATGACGAAGTGCCCTTAACGCAACCGA  
GCGCATCAACAAAGTAGTCCGCGACCTCCTCCCGGCCTCTGCGGTTAACGAAACAA  
AGGTATGTCTTCTCAACTGATCCGCTGCTGGCATCTGACTGATCCTCAGTGCCCATAT  
CCTGTGACGAAAGATGCTTCTCATACCTTGTGAGATTGATCCTTGCAGCTTGATGCA  
ACTTAGACATATCAATCTGATCGATGTGGGTTCGGTTGGAGATCGTCGCTGAGCTGGA  
TCGCGCCCTTCTTCTTCATCATTGCGACCAGAAGGAAGTCTGCACCATTGCTGGA  
ATTGACCGAAGAAGATGTGGCCTCCAGTTGCACCGGTCTTCTTCTCAGCCTGCTCGC  
TCAACTCCTTCATGGCTTTGTGTGACAGGGCCAGAAACGACTCGCTGTCCAACCTCAG  
ATTGCACACAGGCTCGAACGGCCCCCTGGGAACTCGCCTTCGCGATTGGCGGCGGCA  
AATTGACCCCATAGCACCCCATTCCTCCCTTCCCAACCAGTTCGGCTAGCTTGCTG  
GCAAGGCGCAGGACCATCTCGTTAGCGG

>CONTIG\_10\_length\_18517\_cov\_283.314192

GTTGTGCCTGCATTTTCTGCCGCATACTGCAATCGACCCTAGCGTATGGTTAAATCGT  
CACAATGAACGACACCACCGATTCCAGCCCCACCACGCCCCGCGCCAGTTCCGGTC  
GCGGTACGCGCCTCAGCGCAGACGATTGGGCACAGGCCGCGCTGGACCTGATCGCC  
GAACAAGGTGTTCGGTGCAGTCGCCGTAGAACCACTGGCGCGCCGGCTCGGCGTCAC  
CAAGGGCAGCTTCTACTGGCACTTTCCCTCGCGCGACGCGCTGCTGCAGGCAGCCCT

CGAACGCTGGGAGATATTCGAACAAAAAGAGGTGTTTCGGCAGCCTGGAAGACGTCC  
CGGATCCCAGCGCACGCTTACGCGCGCTGTTCCAACCTGGTCGCGCACGAAGTCAAA  
CCGCACGTCATCTACAGCGAACTGCTCAAGGCACTCGACCACCCGGCCGTGCGCCC  
GGTCATCGACCGCGTCTCGCAACGCCGCTCGACTACCTGATCGCCTCGTTCCGCCA  
GGCCGGCCTCACCCGCACCGACGCCAACACCGCGCCCGCCTGGCCTACGCCGCCT  
ATGTTCGGCTTCTTGCAGCTGTCGCTGCAACTACAGCAACCCAAGCAGGCCCGCGAA  
GACTTCGAAGCCTACGTCGAGCATGTGATTCAGACGTTGATTCCGGGGTAGTACGGT  
ACAGACTTTCTCTGCCGCGTCCGACATCAACTGTGGCAACGCTATTTGGTAGCAGAC  
GCCCCAAATTCTAGACCGGTCCGTCCGCGTCTTATCCATTGGCTAAGGATGCAATGC  
GATGTGAGCGTGCTATCCTTTTTTTCATGCTGAGACTCTACGATCCTCGCTACTTCCGA  
ATACGGGTGTGATCCGATCGATCACGCCCTGTAGCTCAATTGGTAGAGCAGCGGAT  
TTATATCCCGTCAGCGCCAGATAAGCGGCAAGTGCCGGTTCGATCCCGGCCGGGGG  
CACCCTATTGCATGTGGAGTTCTATATCGATGAACCTGCTAACTACGTAGAGCACC  
CAGGATGCCCAGCACCTGGGTGGCCCGTAACGTGTGCCTGGCGCTGCGATCAGGGA  
ACGCTCCAAAGCAGGATGATGAACTTGGCATTGTTCTTGACGTCTTGCAGAAATCCC  
GCGCCCAAAGCCTGAAGCGCCTCTTCTGCTGTGCGCGAAGTAGTGACGTACACGCA  
GACAATACGACCACCTATGTCGGTTTTCCCCCCCCGGCTTAATGGTAAGGCCGGTCAA  
CAGCCGCACCACGTTTGCATCGAGGGATTTCGCCATGAGCGGTAAGCAAATCGTTCA  
CAGACGATAGACCGAGGTGAAGTTCGTGCTGCTTGGCCTTGGCCCGCAGAATGGCA  
TGGCCACCAGCGATAGCCCGTCCACAGGCGCATCCGCCACGGCTACACGCAAGTC  
TGCCAGCAGGGTCGCAACGCCAGCCAGCCGCCAGACCGACAGCGTAACTGGCAATC  
CCTCGGGCTGCACGTGCCCCATATTGAGCCGCAATGTTCTGCGCCACATCCGGAC  
GCAGTTCGCCGACCATTTGCCAGCCAACGCCGTAAGTGGCGCCGAAGGACAAGATC  
GACTCGGCACGAACATCGCGTAGATTCCACGTCAATACGTGGTTATCCGAGTTGGCC  
ATCATGGCGCTCATCGGCACGTAGTAATTGCCATCAAGCGCGACCGCCGGCAGCGT  
GCGTTGGCCACGAACGAACAGGACTGTCGAGCTATTGAATTCGGACTCTTTCGTCTG  
CGCTAGATCGCAAGCCTGGGTTCAGGTTTCAGCCAGTCTGTGCCGTCAGGGTCACGCA  
ACACCATAACGAACCGGAGGTGCTTGCGGATCCAATGCGCCTGCACCAGAGGCCCC  
TCACCCGCCGGATACGGGGGCAAGCCCACTACACCGGCACGCCACTCCATGCTGTG  
CATCAGGCCGTGGATCGCCGCGCGTGAGTCTCCGACCTCAGCGACAGGTGACAGCA  
GGTTGGCGGCGCGATGCTCAAGCAAACCTGGCATCTAACTGCTGCAACGCGGGGCGC  
ATCCCACCATCGGCTTCGAGATCGGACAACAGACGCCGACTGATCGTGTCTTCCACG  
TAACGGACGTAATCGTCGTTGTCCTTGGACGCCAACTCGTGCAGCAGGTCCATGGCC  
TGCAGGTCCAATTCCCACAACCTTGCTGGCTGTCGCGCTGGCGGCTGCAGCGAGCGCG  
GTCCCCGCATCATTAAATGAAGCGCTCCATCTTGGTGACATCCGCGCGGTGCTCGCC  
AATTGCCACAGCGCTGCCCCGCCATGCCACTAGGTGCGTATCGGTGGCAGGCTTTTCC  
ATGATCCGCATGCGCGAGCTCGATACCTTGAGCTCCGGGCGAATGGTCTTGAAATCT  
GCCTTCAGCTGCTCCTGGTGCGAGGACATTAGGATGACCTGTAATGGGCGCTCCTGC  
TCCTGATGGGTTTCTCGAACTTCTCGGATAAACGGCAATGTTGCGTTTGTGCTGGCAT  
CGACCAAAAAGTAGTCGACGATAATCAAGTCGTAGAGCTGGTCGTGCGGGATTTGA

GGGCTTGAATACGTATCGATGTTGCCTGCATCGATCCCTAATTCCTTTAGCAGATCG  
ATGACCCGTTGAACTGGCGCGGCGTGTCCCCGACGCGCTGCGAGAACGGCCTCGGC  
GGCGGCGCGTAAACGCTCAGGCGCTTGCACACGAATCGCTTCTTCAGCCAGGGGTTT  
CACGAGATCCTCCATTTTCGTCTGGGCATGCGCCCCCTCACGAGTCAGGAGCGCGAGGT  
ATTCTTCGCGGTCTGGGATCGGTTCAGGTCATTCAACAAGGCAGCCACATGGGCATCTG  
CGATCTGTAGGTCCGCATGGGTTATGCGAGCGGACAGGTCATCGTCAATGACCGCCA  
CACGTGTGATCTGAGCCTCGTTCAGTTTAGCCGCCACATCCATGTCTATTCCTTGGGC  
AATTGCAGTACGAAGGCGCGGTAGCGGCCATCGTCGTCGACGCCGTCGAGCACCAA  
CTTGGCCTGATGATAGGACGCGACCTCGGCCGCGAGAAAGAGCCCTAGGCCCTGCC  
CGCGCGGGCGCATGGTGAAGCCCGCAGTGAACACCCGGTCCTTGTCCGCCGAGGTG  
ATGCCAGGGCCGTTATCCCAGACCGACAAGGTCTTGGATTTCGGGATCAAGCTCCAG  
GTGGATTTCTCGCCGCGTTGCACCAGCCTTCAACCCACGCTGCAGCCAGTACACGGA  
GTTAGTAATCAAGTTTTCCACAGCCAGACTGACGAAACCGCGCACCATGTTACCAT  
GAACGGACTGACTGAGTCCTCTCCGGAGGTGGTCAGCGTCGCGCTGATCTCGTGCCG  
CTCAAAGCGCGCCTCGTAGCCATGCAGAATCGTCTGCAGCAGCCCTGCTAGGTCTGA  
AGAGCTCCTTGCGGTGACGCCCTGAAGGCGTCAAGGGATCGAGCTGCCGCAAGCGG  
GTGTTAATGGCCTTTATTTTCGTTATCGAGTTTGATCAATAACTCACGAGTGGACGGC  
GACTCGTCCTTGGCCAGTTTTTGCAGCAACTGCCGGGTATGACCTGTGGTTTCGCGTC  
AGCTCATGCAAGACGCCCCGACATCACCGTGCCGACGCCCCGCCAGTTCCAAAATGTCT  
TCACGTCGCTCACCCACCTGCTGGGCGCGCTCCTCAAAGCGTTTGGTCTCGGTCTTA  
ATGAAGTGCAAGTGTTTGGCGATCGACTCAACTGTCTTCTTGGTATCTGCAGGAACC  
CTGGCACGGATCTCGGCTAATCCCTGCTCAGCCTGCTTGATCCGATTGCGAATAGTC  
TCCGGCGCGGATTTGGTCACCTCATCCAAGTACCGCGCTTTTCTTCTTCGCCTTCGT  
GGGTGATGTGCCGCCGAGCTCGTCAATCGCGTAGTCAAACAGAATGCTACGCACG  
AGGCGGGTCTGCCGGGATTTCGATCAGACCTTCGCGGTTAGACCGGTCAACCAGATTG  
GGGTTCTCGATTTCGACTGATCTCGACAGCGCCAACAGTCTGGATACGATTGACGGCG  
AACCCGCCGCGCTTGAGCGCGCTGCTGTCGATGGCCAGCCAGTCCTCTCCTGATGAC  
TGGCCGAGAAAGCCACCCGAAATCCGTCACGGTAGATTGCAACACCGCCGCTCCA  
CAGGTCTAGCTCATCTTTTCGCTCTTTTCGTCTGCGGTGCAAGGCGGTTTGTGCTCTC  
AGCGTATCGCGGTTGAACCAGCGAATGCGCGCCTTGAAGGGACCGATCGAGCGCAA  
CTCGTCGGGCGTAGCCTCCAATTTGTGGATTACCTCATCTCCCGTTCGCAAGACCTTC  
TGCGGGTTCGATGCCACGCTGGTGGTCCACAAGAGTCGTCATGACCACGACGTCGCT  
GGGATCCTTCACGTCCGGCGTAAACACAAGCTCCAGGTTCGGCCTGAGCATGCTCGCT  
CAAGACCTTCTTCATGCCTTCAATCGGGATCCGACCCCCATCGTTGTAATATACGTC  
GATAGGAAAAACAGCTTGCTTGGTCAGGTTCGGGAAACGGATTCTGCAGACGACGCA  
GGAAGGAATCGACAAAGCGCTTCTCGACTTGTGCACGATCCCATGTTCGATTGCAGG  
GCGGCAATTTCAATCACTGTGCCGGTGGGATGGTCATGACTGGACTCAGCTGGAACG  
ATCTCGATAGGTATCTGCTCGAGCATCTCGTCAGTCTTATCAAAGACGCGCCAGTCG  
AAGTTGATCTGGTGCAGCTCTTCTGATCCGTCCAGGATGTGACGGTGGCACGATCT  
CCCAGTCGCATCATTGCCAGTCGACCGATGCCTTTGTTACCAAGAAGCGTGCGCTGA

AGTTCTTCGCTGGTCTGCGTGTTGTAGCGTGACGGCGTGCCAATCTGCAGAAACACC  
GATTCCAGATCATGTGCATTCATGCCGCTGCCGCGATCACTGACGGTAATCGTGTTA  
ATACGCTCAAGCAAGGCCACAACCTTCTGGCCAGCTGGCTGCGGCCTGCAATGAATC  
GATCGGAGTTATGACATGCTTCGGGCGCAGCCTCGGGATCTGCGGAGAGGGCGCTTGA  
CGACGTTGTCGACGAAGGTGCTTAGATCCTCATCGCCGGAGGGGTGCGAGCGTGCTT  
GATCGAGAAGTTGGTCAAGCTCAGCCTGTGGTAAACCGATGCGAAAGTCGATACGA  
ACCCGCTTGGA CT CAGCATCGAATGCGTTTTTGTATGAGCTCGTTCAGGGCGACCTCA  
TCGGAAGTGATGAGTTCTGCACCCAAATGTATCAGCGTCCTGGCCGCTACCGAGAAG  
TTCGCCACGTTTGTCTTTCTGATCTGGGATCCTGCGTCTTGCCTAAAAGTAACTGC  
TTGTCGGGTCACACTGATACGGCGACGGCTAACAACTACGTTCGTAAATGCGACCGA  
TGGCTGCTGCCGTGTGCTCTACGGCCATCCTGAGTTCCTCTTTACGCGTGGATCGACC  
AAACGTAAATCGGATCACCTCACTGGCAGCACTCTCATCCAAGCCCAAGGCACGCA  
GCACGTGAGAGGCACGCAGCTCTCCGGCTGCGCACGCCGCGCCGGTCGAGGCCGAC  
AGTACCGGCGCTAGTAACGCGAGGAGATCCTCAGCATCCACGCCAAGGAAGCGCAG  
GCTTAAATGCCCTGGCAGACGCTGGGTGGGGTGACCAATCAGTTGAAAGGCGACGC  
CCTGCGCAGATAACGTATCCAAAAATTCAATGGTGAGTCGCTGCTGACGTTCCGGTAT  
CCTCAATTACGCGTTTGC GGGCCAATGTGCGCCGCTGTACCAAAGCCGACGGCGAGA  
AAAGTGGAACGGTGCCCGACCTAAGGCCGCCTTCCTGTCCGCCGCCGTGCAGCTG  
CGGTTGTAGTTGCTCCTTCAGGTCGCGCGCCACATAGAGGGCGCCGATGCCCCCAGG  
ACCATAGAGCTTGTGGCTCGACAAACACATCAGATCGCAGTTGATCGCCTCCACATC  
CAGCGGCACTCGCCCCGCCGACTGGCTGGCGTCGACATGCAACAGATGACCATAGG  
CATGAACGCACTCGGCCAATGCAGGTAGTGGTTGAAGCGTGCCACCTCATTATTGC  
CGTGCCCCACCGCGATCAACCCCGGGGTGCAGTCCGGGTTGTCTAAGGCTGCCATCA  
GCGTCGCAACGTCGATGAGTCCGGTGTTCTGCACCGCCAGCCGTTTGACCGTGACGC  
CTGCACGCGAGAGGTGGCGCGCGGGTTCTCGCAATGATTTGTGTTCTGTATCCGCTA  
ACCACAGACTTTTGC GCCCCCGGCCTCCGAGAGCATGCCCTTCAGCGCCAGATTGT  
TAGCCTCGGTGGCGCCAGAGGTGAACACGACCCCTTCGGGCTGTCCACCAATAAGA  
GCCGCCACGGCCACCCGAGCGTCGTCGAGGGCAAGCGCAGTACGGCGGCCGTGGAA  
GTGCTCGGAGTGTGGGTTGGCATGGGCATGACGCAGCCAAGGCAGCATCGCATCGA  
CGACCTCATCCGCAGGCGGGGTCGACGCAGCGAAGTCGAGGTACAACGGTTCCTTA  
GATCGCTTGGCCATACGGATCATGCTACTTGTGGCACACCAAGCAACCCTGGCCGCC  
CGCAAAAATATCTTCCATTGCGTTCGATTTCGGCCTCCGTTTGCGGGCGTAGGGGGTT  
GCGGCGAATTTTTGCCTGAGCGCGGGCCAGCCGAGCTTGATGTTGCGGCTCAATAGC  
GCTCACGCGCTCAGGCTGCTCGAGCTCCTCCAACGATTCCCGATCGCTCCATGTAAA  
AGGTGAGCCGTGCTCCATGGCGCTTTTCTCGTAGCGCTTGGCTTCCTCGAACCGATC  
CGGGTGTTGTTGTTTGTAGGCGGACCCACTCGATCTTCTGTTGGAAGAAGCAGAACGT  
ACATCCACTGCGTGAACGCCAGTTGTAGTACTTAGGCAAGCCTACACCTGCGCCCTG  
CAGTAGATCCATGACCCCGGCATGATCGACGCCCGCTTCGCGGAAGGGCAGATGTA  
CCGTCAGATTCTGATGCCCCGAGTCATACCTTCTCGATGCGACTCGTCGGCGCGAA  
TGGAACATAGCTGTGCACGAAATCGCCAGCCTCTAGCCAAGGCTTGATCCAATTGC

GAAAGGGCACCAGCTTCAGCTGACGGGTACACCAGCGCGTGTTTACCGAAGGCAGG  
AAGTGACCATACTCGCGCAGCCAGAAGTCGAAGTCACGCTGCGGATTCAAGCGCAA  
GATAGGCTTGCCAAGGAAGCCTTCAAGACTACCCAGGAATTCATATACCTCCGGCA  
GCTCTTTACCGGTGTCAGTGAAGAAGTACTGAAGATCGAGCTCGGGATGATGCAGG  
CGCATATAGACCGCAAGCGCCGCGCTGTCTTTGCCCCCGATATACCTAATACATGC  
CGGTCAGCCACGTTTGCATCCTTGTACTTGCAACTCTTCAAGCACCTTGGCACCTGCT  
TCCACGAGTGCAGCGAGGATCAAGTTTGGCTTCACGCCATTGCCGCGTAGATGCTCA  
ATCAAGCCATCTCGAACACGATGGATGACGGGCGCATCGGACTCGGCCACGTCGAT  
CGTGGCCGAAACCGTATTCTGACCTCCGAACACTACGGCCAGTGCGCGACGACCAG  
CCGGGCGTCCCTGCACCGAAGCAAGCGCCTCGATCCGGCGAAACTCGAAGGCCAC  
TGCGAGAGCTGCACAGCGGCCTGGTCCAGATCTTGATCGCTGAACTCCCTCGCAGGC  
TTGCTGACGGCTAGCGCCGCCAGACTTTCGATGTCTGCATCACTTCCGGTATAGGTC  
GCGAGCCGGCTGGCAAATGCCTCCAGCTTCAGGTTGCCACTTACGCCTCGGACCGCC  
TGGGCGCGCCGCTCTAACGAATCAAATGCATCGCCATGGTCGATGCTACTGAGAAG  
CGTGCCCTCCAGTGCCTTCAATGCGGCTGGATAGGCCTGATTGAGCTCCTCAACGAC  
CTTTCCGATCTTGTCGACCAGTGCTTTGCCATCACGGCCCGTGTCGAGCACTTCAGG  
AAGGTCGACGAAAATCGTTTTAACAGGATCTGAGGCACGCAGGAGGAGCGTTTCGAG  
TGTTGCGCGACACGTCGCTGACCTTCGCCGTACGCTGTGTCCACTGCGGAAGCGACA  
AGGTCCAAGACACCAAGGCTCGTGCAGAGTCGAGCGGATCGGCCGAGACAGGACG  
CTGCGTCGCCTCTTCCAGCCTGGCTGCCAAGCGGGTCAACATCTGCTTGGCCGAGGC  
ATCCATGCGCACCCATTTCCAGCTGATGCGTGAAGGATCCTGGAGCCACTCATCCAC  
ATCTGCATCGGTCAAATCCGCGCAGAACATTTTCATCGACATACAGCGCGATCTCGCT  
GCGGTGGGCCAGCAGGAACGCGAGCGCGAGGATGGGCAGTACGCCTTGCTTGACCC  
CATAGGGAATCTGCCGTGCCACGTCGTAAAGCTGTGCCAGGGAGATCGCACCATCG  
CTGCCCTGCAGCAGCTCACACCAGGCCTGCCACAACGGCACCAGGGAACGTGCACC  
CTCCATCTCTTTAGACAATTCAGGCGAAGAGAAAGTCCC GCGCTTCTTGACCGTCCG  
ATGCAAACCAAGTGGCGCCAGGATGGTGTGGTACAGGCCCGCCTCAGCTGGGTAGC  
CCGAATAATCTAGTTCGGGGTGTTACCCGTGCGAGAGCATGCGGTGCATCAAAAGA  
CGCTGTGCCTTGGCGGCATTGGACGAAAGCACATCGCGATTAACCAATTCGCTGGAG  
ATCTGCGGTGCACTCTTGAAGGCGGCATCACATACGCGGCTGGCCGTAGGCGATAG  
ACCCTCTTCGGCCGTCGGGTGGAAGATCTTGCTTGCGCTGTACCAGGTTGCCGTCGA  
GAAGGCATCGCGCAATGCCGCGTCGAGGTCACCGCGCAGCTGCTGCAGTCGCGCGT  
GGATTTTCGCGCCGGGCAACGCCATCACTTTCCAGCGAAGGGGTGCTTTTCGGCCACAT  
GTTCCAGCGCGGCCAGCTCACTGGCATACTCGACAAGGCGATGATGTCCCTTGGGG  
ACGCCGAACAAGGTCAGCGGGTCCTCGGCGGTCTTAGCCAGGTCGTGAGCCGTCTG  
CGCCAACCTGTTTCAAGAGTGCTCTCATCGTTTCGGCACAAGCAGCGCTAAGCGCCCGGT  
CGGCGCCTTCTTGACGGCGCATGCGTCCCCAGTGACCGCTCGGGGTACGACGCG  
ATCGTTCGAACCAACCGCAGCGTGCCGGTCTTGGAGTAGTGCTTGCGCGCGGTCAAAG  
GTGGCAAGACGCCCAGTTGCTTGAGCTGTTCGTCAATGCTCTGGCTGCGCTCGCGTT  
TGGCGGTATCCACGGCGGCGTCGATATCGAAGTCGCTGCCCCGCATAGATGGCCCAA

GCCTCGTTGTGCTTGCGGTAGATGACGATACTCGCCGCGGCGAGCTCTTCCAACGCC  
ACTTTGACGGCCTTCGGCGAGGCCTCGCTCACGGAGTTCTCAAGAACGTCGTGACTG  
GCAGCCAGCCCCGAGCCATTCCGGAACAGCTCGATCAGCGCGATCGTCTTGGCCAA  
AGACACGTGCGGTTCTCGGAACCGCGCCTCAACGCGCTCAATGGCTTCGGCGCTGAT  
CGCCCATCGATGGCCGTCAGCCGATGCCAAGATCGCAGGCTCGAAGTTGGAACGAA  
GATAGTCCCAAAAGTGCGCCGGTTGGTAGTACCCGATACTTTTGCGAGTGTGGCCAG  
CCAGAACTCACGGAAGCCCAGCGGCTCAGCCGAGCTCAAAAAGCCAAACACGCTG  
CGCTCGTTCTGCCCCGAAGCGACGGCGGGAACATGGGCCGAGTAGGGGCTGCTGTCAC  
CGGGTGACGCGGCCAGCACTCATCCAGGGTGTGAGCCAAGGTCGCAGGCGAGGCGG  
GCCTACGACGTTGAATTGCCTTCGCAATCACGTCGGTCACGTTGCGGCTTCCGGGAT  
GCGGCTCCTCGCAGCGGATAGCGCCGCCAATCAACGCAATGACCTCGTCGGTACCG  
GCCACCACGGGCACATCCACAAAGCGCCCTTGGACCTTGGCCCCACTCGCTTTGTACA  
CCCCGACCTGAGCGCGAAGCGTATTGATCAAACGCTTGGTGCAGGATGCCGATGAC  
CACCAGCTTGCCATCGCTGCGACTAGCGGCTTCGGCCAGCTCTTGACAGCAGATAGAT  
GTCTTCTCCCGCGGCAGCTGCTGCTTCCAGCAGCTTGCCCATCTCGTCAAGGAGCAC  
TACGACGCCACCATGCTCGCCCGTCTCCGCACGCCGCACCAATTCAGCAGTCACATC  
GCGGTGTCCGTTGCGCATGCGCTTGGGCCCCGCGCTGAGGCGCATGCTTGTCGATCGC  
CTGACCGAGAGCCTCTTCAAGGGCCTGACGGCGTCCCACGACGGGCACGACCAACC  
ATGGCTTCTTGCTACCGAAGGCCTTCCAGATCTCGTCTTCCGCCTCGACATTGAGCG  
CCTGTTTGGCACGCTTGCGGACCGCTGGCGTCCCGCCGGCCAGCTGCGCCAAGGCAA  
GTGCGAGGGTCGACTTGCCCCGCCATATGGCCCTGTCCATGTAAAGGCACGCTGCT  
GAGAATCGTTGATGTGATTGCGCCACTACAGCAAGCGCATTGCGTGCACCTTGACTGAC  
AAATGTAGCCATCCAACGCATCGGCTCGCGCAAGGTCGGATTCCAGCTGAACAGAT  
CGCTGGAAACGCCGAGTTACTTGTATGCGTAGTTCCACGTTACTTGCCATATGCGTG  
CTTCAGAAGTCGTTGTTTGAGCGCGTCCAGCGGTTCCGGTCAGCACACGACTGACCTG  
CCGAACGCCCCGCGTATCACTCCAACGCAGCTGCCCTTCGGAGATCTCTTCCAGGTT  
CGTCAAGCGATCGCCCACCGAATTCTCGTCCAGTTTGAAAACCCGACCCGGCGCACC  
GAACTCATGCGCAATGGCTTCGAAAGACAGGGTGCTTGGCCAGATCCGCTGGACC  
GCGCCTTGCTTTCCAGAAAGTCGAGCAGCGCGAGCGCGAACAGCCCATCGGGCAGC  
GAAGACTGGGCTCCGCGCCGGAATCGGAATGTGCCAATCGGCCCTTCGGCTAACAG  
ACCGAGATCTACCAAGAGCGGTTTCGGCGGCGTCATCGGCCCCGCGTCCATCTCGGC  
GTGTCACATAGCAGCGCAGGCACACGTCCACGTCCCGCTTTAGGGTTACGTAGGAG  
ACGCGGTGCCCCGGCCTGTTGGGCTGCATGTGCAAGCGCTTTGGCGACCTCTTCGGAT  
TCGAAGGTTTGCTGATTGATGCGATTGAAGACCCACCACCAAGTGGTCGACCGCTTT  
GCACGTCCGGCGAGCAGCCAATGCACCCACCATGCGCTTGCCGGCTTTTCCAGATAG  
GGATCCAGACCGCGGCTGCCGAACAGCGCTCGACCGACCGTGCCGACGCCCATCTT  
TCCTGCGGGCCTCTCTTCCAGAACATCACACGCCAACGCCCAATGGCGGATTGCCGA  
CACCATGTTCTTGCCGACCCCGAAACGACGCATGCCATTTTCCGGCACGAACGCCAA  
CTTGGCATTGCCCAAAAAATCAGGGTGCTGCGCAGCCTCGTAGGCCTTTCGCAGCCA  
CAGTTGTCGAACGGAAAAAGTCTCGTGACCGGAGAAATTGGACGTCGTCAGGCAGAG

CGGTAAGAATCATATCCGCAGTCTACTGGCGGAGGTCCCCAGTCGCCAAGGATCTC  
ACTGGTAGTGATCACCAGGGAGACACCTTGTGAGGGAGGCAGGCTCTGCAACGCAT  
TGATATATTTAATAAAAACCTATATTCGGCATGCCCCGTGACATCGCATTCCTGCTTAG  
GACGCGTCCCCGAGGCACTGGACTGAGACCAAGTATGCGCGAGTCACTGCGCCAAA  
AGTCGTGCTGCCCCGCTTCGCAAGTCGGTGCGCGGGAGAAAGGAATTCAGGATGAGG  
TTAGGAGGGGCATGCGTGCTTCACCGAGAGCGAACGCGAGCGTATTGCATTCATCG  
AACTGCGCGCCTGTTTCGAGGTGCGCCGCGCCAACCGATCAAGGTGGCGGTCTGGC  
GCGGCGGTGTCTTCGGCGGGTGCCCCCTGGCGGGCCTGGGTCTTAGTTCGGAAGGT  
CCATCACATTACGCGGCCCGCTCCCCATAAATTGGGAGCTCGCCACCTCTTCGCCTG  
GGCATAATGACCACTGTTGATCTTTACGACACCGAGCACCTATGCGTCTATTTCTCG  
ATACCGAGTGGGCTGATCAAGCGGGGCTCGAGCTGGTCAGCTTGGCTCTCGTGTCTG  
AAGACGGTGAGCATCGATTTTACTGTGAAGTCGCGACTTTGCCCGAGCAACCAACCG  
ATTTTCGTTTCGACAGGCGGTGTATCCGTTGCTAGATCGAGGGAGCGCTGCTAAGGGAC  
ATTTTGAGTTCACGGCAGGGTTGCGCACATTCCTTGCCCACTTCGAAAGGCCATTCG  
TACTATTTGACTATCGAACGGACGTCACGTTGTTCCGTTACGCGCTGGGAGGATTTCG  
ACCTGTCCGCAAGCACCTTGCTCACGTTGCCGCCGGAACCTGCAGCCGTTACGACGC  
TGGTGCTGCGTGAGGACGTGCGTAGTGGGATCGATAGGTATTTTCAGTCGCAACCCTG  
CCCTTGCTCATCGCAAGCATCACGCGGCGGTTGACGCGGATGCATTCGCTGGGCCT  
TCATTGATGCGTTAGGGAACCTCTGAACAACGCACCACAGATACGCGACACTACCC  
GCCTCATGTTGAGGAGTGATCCATGCAACTGACGTTCCGGTGACGCTGAGGGCCTGGG  
CAAGCGCAAGCAGACCCGGCGCGAGATTTTTCTGGCCGAGATGGAGCAGGTGGTTC  
CGTGGCAGCAACTGCTCGGGCTGATCGCGCCGCACTATCCCGTGTCGGGGCGGCCA  
GGTCGGCAGCCGTACGCACTGGCGACGATGTTGCGGATTCATCTGCTGCAGCAGTGG  
TATGCGCTGAGCGATCCGGCGATGGAAGAAGCACTGCACGAGATCCCGACCTTGCG  
GCGGTTTGCTCAGCTCGGTGGCTTGGACAACGTTCCGGACGAGACCAGATTCTCAA  
CTTCCGGCGCCTGCTGGAGACCCATGGCCTTGCCGCGCGGATGCTGGAAGCGGTCA  
ACGCGCATCTGGCGCGCAAGGGCCAGAGCCTGCGGTGCGGCACGATCGTCGATGCG  
ACGCTGATCGCGGCGCCAGTTCGACCAAGAATGCCGACCATGCGCGCGACCCTGA  
GATGCATCAGACCAAGAAAGGTAATCAGTGGTATTTTCGGGATGAAGGCGCACATTG  
GCGTGGATGAATTTTCCGGGTGTTGGTGACACAGTCCATTGCACAGCCGCCAATGTGC  
CCGATGTCACGGTGACGCACACGTTGCTGCATGGCAACGAAGACAGCGTGTTTCGGC  
GACAGCGGCTACACCGGCGCGGATAAGCGCGAAGAACTGCAAACCTGCGAGGCTGC  
ATTTTTTCATTGCTGCCAAGCGTTCGGTGCTTCAAGCCCTCGGCAACAAACGGGAGCG  
TGCTCGGGAACAGCGCTGGGAACACTTCAAGGCCAGCGTGCGCGCGAAGGTGGAGC  
ATCCATTCCGGGTGATCAAGCGCCAGTTCGGTTACACCAAGGTCCGCTATCGCGGCC  
TGGCCAAGAACACCGCGCAGGTGCTGACCTTGTTTGCGCTATCGAACCTGTGGATGA  
AGCGAAAGCAGTTGATGCCTGTCGTGGGGGCGGTGTGCCTGTAACCCGGGCAACAC  
CCTGCAAACGCGCCGGAAACGGCAAAAAAATCGAGGATCTGAGCGCCGTCAGCCTG  
GCCGATGTGGTTAGGCTGATCCTCCGATGCCGTTGATCAGACCATCCTTAGCGGGAA  
GGGGTAACGCTACTCACGCTCACTGAGCATTCTTGCAAGTGCATCCGATTCGGAAGC

AACTCGTTGCATCCTTGGGTATCCCGGCGCTTCAGGGGCCAAGTGCGCGCTCGTTGC  
CTGCGCCATCTGTGAAAAGGTATGTCAGAAGCACTCGGTCCCTAAAGCAGGGAATC  
AGAGAACTGATGGCAGCTCTATAGGGCAATACCCAGGGGGGCTCGACTATGGTGCA  
TGCCATGCGGTTGGTGGCCTTAAAAAGCTCGGAATGCGTAGTTCCCAGACGCAGCAT  
TTCCGCTTCCCACATGAGACAGACCAGAGCTAAGAGCCCCCAGATGTCCCCTCTGGC  
CTCCAGCTCCGCCGTGTCATAGCGAGTGGACGCGTAGGAAAAGGGGGCCGACCTCTT  
CGGGAAAGTTCCACCGCCATGAATTGGCCCCTACCCGGCTCAAGCGCTCATCGATCA  
GCGCTGTCACCCGTTTCCGAGTGGGTGCGTCAGGCCCAAGTAGTGAGGCGGCGTCG  
AACAACCAGATTGAGTTGGGAAGCGATTTGGCTGGTTCTCTGCGTCGCCTGTCTGGC  
AGGCCTGCAACTCGAAGGGCCGATGCTCGGGTCGGACTTGCTTTGCCGTTTCAGCCAT  
TTGGAAACGAGTCTGCTGTGCGCGCTGTGCTCCGCCATGTAGTCGATGGAGAAGCGG  
TAGGGCGTTACTCCCGACCTAGACAAGCAGTAGTCGAGCCACATGCTCCCACGTAG  
GACCCGCCAGTTCACCGCATAGCTGCCGCTTGGCTTCTGGGGACTCGACATGCAGGG  
GCGGCTTTGGGGAAAAAATAAGGGATTTCTCTTGCATCCCGATTATCCCCCACGCA  
CATCAGTCACGCAAGCGACACTACGTGCAACTTCGCTCTACAGGCAGTCACGCTGTG  
ACACGTCGCTCTAATCGCCAAGCCGAGATTGACCAGCGAGCGGCTCGGTTGACTCA  
GCAGTTTGGAGAGCTCCTTTCCATTGCCGATCTGGCAAGCGCTCTGCGGTATCCGAG  
CGCAGCCGCAGTAAGGCAGGCTAGGCGTCGGGGAAGGCTGCCAGTAGAGATGCAGT  
TGCTATCCGGTAGGCGCGGATGGTTTCGCCACTGCACGCGCGGTAGCGGAGTACCTGT  
ACCAAGTTGATGCGCAGGGCCATGCCAATGCTGCCGGAAGGATGGCACCTACGGC  
ATAGACGAAGCGGCCGTTGCCGACCATGGGGCCGAGGACTAAGAGGAGAGAGCAA  
ACATGCCGTAAGCACCGGATCAAGAACCCGGGAGCCAGATGCACAAAAGCCTAGG  
GGCCCTTGCAAGGGGCAGTCCTAGGCTTCTGTGGGGTGAGATCTTGAAGGGCCTGCA  
CGCCCAATTATGCATTTCCGCTCGATGGATGCAACTGCCTGGACCTCAACCGACCAG  
GCAGGAGGTCATCGTGCGCCCGGCCGCTGGCTCAGCCAGCCCGTCCCTCCCGGCAG  
CACGCCAGGGGGCGAGATCGCTACATGGGCGTTACATGGCCAAAAAGAACTTCTT  
GCACTCCAAGGAGGCGCACAACTATGCAGGGATATGCAGAGATCTAACCGAAGACC  
AGGCAGAAGCGCTCTTCGCGCAACTGAGATGGGGAAGCGAAACGGAACAGGCGTGT  
CCAGACTGCGGCACCTTCCGCCGGCACTACCGCCGCAACGGAAAGCGGCGATGGCG  
TTGTGCGGATTGTGGTCACGAATTTAGTGCCACCAGCCGCACGGCCTTCCACGCGCG  
CAAACCTCTCCTATCGTCGTTTGATCGGTCTGCTGTTGTTCTTCGAAAGCGGGGCAA  
GGGCAGGTCCCTCGCAGAGTCTGCCCCGCGAGCTTGGGGTCCAGATCAAACTGCGC  
AGATCAACTTTGGCAAGATCCGAGAGACGCTAGTTAACAGTATGGATCTCACGCCG  
CTGCAAGGCATCGTACACATGGACGGCATCTACTTGGGCGGGAAGCCACGGCGACC  
GAATCGGCGTACCAAAATGCCTAAGGACGCACTGAAAGTTCGGTACGGCAAGAAAC  
CTCCAAATGATCCCTCCAAGCCCTGGGTTTCTGCAGGAATGACGCGCAGGAACTGGC  
GCAAGCGCATGGACAAGCGGGTCGTGATTTCCATCTGTCAGACAGGGGATAAAGGG  
GCCGGCTCCGAGCGCGTGATGGCGTTCGTGTGCAGGGCCGAGAACGAGGCCAATGT  
CATCGCACTCGCCCAGCGCTTCATCCAGCGAGGATCGCTGGTGATGTCAGATGAGA  
GCCCCGGCTTATAATCGGCTGGGTAGCTGGTTTGAGCACTACTCTGTCCAGCACTCCC

ACGAGTACTCCACTGACGAAGGAGTGAATAACAACGCGGCGGAGAGCTGGAACAGT  
AGGATTCGACGCCACGAGTACGGCGTTTCGCACGGGTTCGCCCCAAAGTACATCCA  
GGACTACGCGTGCGAAATGGTCTGGAGGGAGAATTTCCGTCGGGCTTGCCAGAGAT  
CTCGGGTTCACGCTCTTCTCAAAAGCATGGTCCAGTCACCCCGATCAACCTGGTGGC  
GGGGATACTTCCAAGGCAATCACCGCGAGACCGAGTTGGACATAGACTATTCCTG  
GGCAGGGATAGCCTGGTGCCGGCGTGAAAGCCACCAGAATGATTA AAAAGGATCGC  
GCATGATGACCAACACTCAGCTCAACAGGATTCCGAGCGTAGAGCTTCAGTTGCTTA  
CGTGGCTAAGACTCGTAAAAGTAGGGGGTATAACGAACCGTGTGGATCTAAAACGA  
GGAGGCTTCAGAGTTCAGGTGCATCCGGCTATCCATAATCTAGATGGCTTTGGTCGG  
CGCGTTCACGTGCTCAACATTGCGCAAGTCGTTGCCAATCCGCGATATGAAGGCCGA  
GGCTGGTTCACTGGTTTCCTTGA ACTATGTGATGAGCTCAACCCGTGGGATGCGACG  
TATGTGCGGCAGTGTGCTGAATCCCCACTTGGCTGCCTTTCTCCGCCGGCAAGGATTT  
ATCGAGCAACAAGGAGCGCAGTTCTATCGACCTTCGAAGGCATGGAGGGTTCGCCA  
CAGCTGGTCGGTTGAATGCGCATCCTCGGCACAAGCCGATGCAGACGCCGCACGCG  
TCGAAGGGCTTCTGGACAACTTCGAGCTGGAGGCGATTATGGTAAGAGAGGCAACG  
CTGCAACGTTGAGCTGTGAGGCGCATGGCTCAGCCTGCGGCCGGAGGTCTGCCCCGA  
GCTTCGGGGATTCCATCCTTTCA TTGCGCTCAACATCATCCGTCAGCGACGTCCGTA  
AGTGCTGGCTAGTGCCCTGCCGGACAGCAGACGCCAGCGGGTATGATTCTGTGCGCA  
ATCCGTGGTGCCCTGGGAAA ACTCTCGCTCTACACTTCCCTTGGAACCAATGAGGT  
CAGGCGTTTCCGAAACGACCGCCGGATCCTCTCGTACA ACTTGCGGTCGCAATTCTC  
GTAAGTGTGCCCAGTCAGGCGCTCGACCAACTCGCCGGTTGTGAGCCAATCCCCCG  
GATTCTCAGCGCGGCATACAAGTTTCGAGTTAGGTCACCGTGCCTATAAATAGGTTG  
ATTGACGTGAGGAATGACTGCGGCGATGTCACCAACATCGACTTGCACTTCGTGCAT  
ACCAAGAGATGTCTCGATGGCAAGAAGGTTCTTCTCTGCCCTCTCCAAGCGCTGTGCG  
CTGCGCGACA ACTTGAGAATCCAGCTCTTCTGCCTCCCGGCGCAGCAGCTCAACCTC  
CCCCTGCAATCGGGAGTGCTTTACGATCAACCACTTGAGTGAGGAGGGGGTTTCGCCA  
AGTCATGGGAGGACTGTAAAAAGTCCTCCCAGAATTTTCATGGGGCTTCTGCTACCA  
ATTAGCGTGTGGCAAAAAAAGGGCCCCGATTATCGGGGCCCTTTTATGCGACTACG  
TTTCTAACTATTAGAAGCGCTGCTGGTACTTCATATACATGAAACGGCCGATATCGT  
ATCCACCATAATACGAGTACCCCGAGTTCGGCTGACCATAAGCCGGTGCCGAGTAA  
TGCTCGAAGATATTGTTTCGCACCAAGTGCAACCGTAGCATTCCACGGCAGCACGTAA  
GCCACCTGCAGGTCGTGGAATGTGTTGCAACCAAGCTCATTCATGCCGACCGTCGCG  
CCTTGGA ACTCAGGAGCGGTGAAGTCAGGAAGGCTGCAGCGATCTGCTGCAAAGCA  
GCGCTCCTTGGTGCGCGAGAAGTAGCGCGTGCTCCAGGTGACCGACCAATCATCCC  
ACTGCCAGTTTACCGACAGGTTTGAACGGATGCGGAAGTTGCCGCCAAAGCCATTCT  
GCTGGCTCGGGGGGTTGTGCGGTGTTGTCAGCCTTCAGTTCGTTCTTGATACGTAGG  
TGTTTAACAGTGACGTGGTGAAGTTACCCCACTGAGTCTCGAACCGATAGTTCAAGT  
CGAAGTCGAAACCTTCGGTCTCTACATAACCTGCATTACGCAGACCGAACGAGAGG  
CTGGTGATGTTGCCTGCCGTATTGCGGGTAAAGCCGACGCAACGCGACTGGATGCCA  
CGCAGGTAGCAGTCATCCAGCAAGTCAGTCGGCGTGTCGCCGACGATGGTGTTCTCG

ATTCGGATGTTCCACCAATCCAACGAGGCGTTCAGGCCGCTGATGAAGCTAGGACTC  
CACACCAAGCCAAGCGTCTTGGAGGTCGAAGTCTCCGGCGTCAATGTCGGCGTCGA  
GCCTGACACGAACGGC

>CONTIG\_11\_length\_15149\_cov\_25.833977

GGCTTGAACAGCGGGATCAGCAGCGCGATCCAGGCCAGGAGCGGCACACCGAAGC  
CAATGGCGCCGGCAAGCTTGATCTTGGTGGCATAGGGAGCGAACTGGGGAAGGTTCG  
AGCGCTTTGACGTAAGACCAGTAGGTGCCGACGCTAAGCGGCCAGCCACCTTCAA  
CAGCATCAAAATCAACTGACCCGAAAGGTAGACCCCTGCGGTGAGGGCAAGAAGCA  
AGAGCACGATGGCGACGCTGAGCTTGGTCTTGCCGGTCATGACGCGCTGCCTTCCAT  
CTGTGATCCCTGGCTTGTTTGAACGACCGTCCGCTCGCAAGATTACAGGATCACA  
CCGCCCCGCTCAGATCGGATGGGCGTTGGCATCCGTGTAGGAATTGTCTGATCTGCAC  
GCATGCCAGGGCCGCGAGTAAGGCCCTCCGCCCTATGCGCTAGGCTGATTGCTGCCCT  
GGGCTTTGAGCTGCAATTCGGCCACGACCTTTCGCTGCTCCTCGACGGAGAGCTTGG  
CGAGCGCTTGATGGCGTCTGCCACCTCATCGGTCTCGGCGAAGAAGGCAGCCAGT  
GGCATGCCGAGAGCGTCGGCCAAGCGCTTGGCGGTGCGTAGATCGCACTCGTTCAC  
GCCCTTCTCGTAGCGATTGATGCGCGTCCTGGCCACCTCAGGAGCCAGTCCAGCGGC  
AACACCCAAGGCTTCCTGGGTGAGCTCGGCCTTCTGGCGCGCGTGACGTAGGCGGTT  
GGCGAAGATGAGACGAGCGTCGTCCAGATCCAAAATGTGACCACAAGCATGCAATG  
ACGTGTTTGAGCATGAGGTCTCCGACTTGCCCTTGTCTGTTACTTTATCAGTAACATGG  
TTCCGTCCGCCAATCAACTGGGATTGCCAAGCACAAGCTCGGTCAATCCGGGGACGGT  
GTGTGGAGGCATGCAGCCATTGAGCATGCCGGCAATCCGGGGCTCTCCAAAGCTGC  
CAGGTTGGTGGACCCATACGCGCTTTTCTCTTCTTTTGGAGATGCACATGTCAAA  
GCTTTGCTTGGCGCTGGTTGGCCTGATGTCGGTCTGTTTGGCCAGCTGCTCTTCCGGT  
GGCCCCTCGCAGTCTGAGCGAGAGCATGCATTCTTGCTGTTCTGTTCCAAGACAACAGC  
AACGAAAAGGCGCGCATCGAAGACTTCGAGAGTAACCAGTGCACAAAAGCGGAAG  
GTGCGCCCAGCTACACCTGTGACGTAACGGCCAAGGTCAGAGCCATGGATCGCGAC  
TTTGGCAATCAGATGGACGGGGTTTACTCGTTCACCAAGATGGGCGGCACTTGGA  
ATCACTGGTCGCGTCCAATAACCACCGTTGGCGATCAACGGTGACACCATCCATTCC  
TCAGGAATTCGCATGACCGTCGGCACTTTTCTTACTCTGGTTTTTTTCGGTGGCTGCG  
CAGCGATCTTCTTGATGCTTGCCAAAACGGTGAAAGCGCGCAGTGACAACGCAACC  
TTTGACCATGACTTCCAGCGGTTTTATGGCTACAAGAACACGCGTATTGCCGTGTCG  
ACGGCACGCGCCATGATCAAGTTCAAGGCGGGAAGTCGTATCAAGGCATATGCACT  
GAGCGATGTACGGTCCTGGGAAAAGCACTGGCACAACCTACAATCGCGAAGGCACGC  
TGACGCTCAATGTCCGCGACATCGATCATCCCGTGTGGACGATCAAGTTCGGCAACG  
AGACCGAGATGAACAAGTGGTATGAGTTGGTCAGTCAGGCGGTCAACGAAAAATTG  
AAGCTCTAACTGACTTCTGTGCAGCCATGACGTCGCCGCCTTGACGATTAGTGATTC  
TCTGGTACGAATCATGGCATGAACCAGAAATCAAAAATCCATAACAGAACATTGAA  
GGCCAGCTCGTCGCTTGACTGGGACGAGCTGCATTTCCGCGAGGAGCTTCTGACGCA  
TTGCGTTGAGGAATTCCTGAAAAAGGGCTTCGGCCTAGATTCTCACCTTGAACAAGC  
GCTCGACGGATACCGAGCTGGCCGCTACGACATGTCTGCATTGCAGCGCGAGATCA

TGCGGCCCTACCTACATTGACGTATCCGAGGCCACCTCGCCCGCTTGACCGTCCATC  
CTGACATCACCGCCTGGGTTCTGGGGCGCGAGCGCTTCATTGGCGCTGAGAGCAAG  
ACGTCTGTCTGCAAACGCTCGCTCCGCACTGTGCCCTTCCGGAACATCCATGAGCAC  
CCCGCCAGACCGATAACCGGTCGAGCAATGATGCAAAACCCGCTTCGCCTTCGACTA  
GTGCTGAACTATCAACTCGCATGGTCTGTGTTGCCGTTGTCACTGGATGAGGCTCAT  
CTACTCCGGCTTGAACACCTGTCCTCGACAGATGAGCAGTGATCTGAGCGGTGACCA  
TTGCCCCGATCCACTCCACCTCAGCCCGTCCATTAATGGGTCCATCCAGTTCGCGCG  
TCTTGGCAGCTAGACCTTCGGGGGTTCATCTTCCGTGTAGTGGCAAGCAATTGCGCAT  
AGAAGTGCCGTGGATCGCCTTGACAGGCGCGTGTGAGCTTGCCTGGATCGCAAAG  
CCATACCGATCCACCAAGCGGTGAGCTAAGTCGTCGACGAGATCCCAGCGCCGCGC  
ATCGTTCAGCTCATGCGGGAGCGAAACGCAGAAGTTCCGACACAGCGTGCTGTCCTT  
GCGCTTCTCGGCAGCCTCTGCCGCCGTCCAAAGCGCCTGAGGATCATCGGCCCAGGC  
CGGAGAACCCGTTGGAACAAAGCATCGAGTTCTGAGCACGCCCCGGCGCGCGCGAT  
AGTCGTGAAGCCTTCCGTTGGGCTCAGTGAGAAGCATCGCGCCCCGATACGCTGCG  
GCAGCAATGGCGGATTGATTTTTAGAACGACTGAAAGTTTTGACGCGAACATGAAA  
GATAGCCATGGTTATTCCAGTGAGTGAAGATCACTCTTGTATCACCTCAAGTTTCTCC  
CCCAGCAAGAGCAAAAACGTATAAAAATCGCGGCAAAATCGAATGCCTAAAGAGTG  
ATGGTTTCTAAGCGTCGCGATTATCGTTTATATGATATTCATTTTTTAAGAATGTGAA  
TTAAGACCTGCAAATGCTTTATCAAACGCCTAATCTTGCTCTTATAAAAAAATATAA  
TAAGACGACCTTTAGGCGTCTATTTTCAAAAAATAAACACTATAAAAAGTTGACTAG  
TGATGAAACCCAGAAGCGCCCGAAAGCGCCACCCCATAAAGGTTTAGCTCAATTAA  
CCTAATTAATTTTTTAAATGCTCTTGCCACTTATTGACCTCAACCATTTCAGACACCGA  
GGCGTCGGCCAAATCCATTATTTCAATTTTTTTATCATTGACAGCTTGTAGACTGACG  
CTATTGCTGGATCATCTCCAACCCAAAGGAAAGTCGATGACTCCAAGCAAAAACA  
ACCACCCGTTGTCCCTCTCATCAATGATGGCGAACAACCTTCACTTCAAATCCATTCA  
AGTCGGAAAAACGCTATTTAACGATGTTACCGTTCGCGGACGACAAGCCGCGATCC  
AATTGAGCGAAATGCTACAAAGCGCATGGCAAACCTTTCTGTGCATCTCGCGCTCGTC  
GTCCTCGATCACGCTATCCAGAAGCACTTCCCACGGGATCACCTGCCCCGCTGCTTT  
CTGTTGAGATCGCGGACTACCTCAAAGATATGGCGCGCCGTGATCTGCAAGACACC  
ACGATCAACTCTGCCGCTCGATCCCTTAAATTTTACGCCTGACCTGTGGAGATGTG  
CCCGTTTCACAGATCGACCATCAACACATTCACCAGATGTGGGATGTCTTGCGTTGG  
GCGCCACCGGGCCTGACCAGCAACCCCCGGTTCGAGTCGATGAGCGCCGAAGACAT  
CATTCGCGAAGGCGCGGCACTCAATGTGCCCTGCCCCGCAAGCGCCACGACCGAGC  
TGCACCGCCGAATGGTGACAAGCTTCTTCAATGCGTTGCTCAAAACGAAAGCTGTTG  
CGCACTCGCCGATGGCAGCGTTCAAGCCAAAGAAGCCATCGCTCCTCACC AACACC  
ACAACGCCATCCAGGCTCTTGTCGGCGGGCGATATTCAAAAAATCTTCGATCCTGCG  
ACCTTCAATGCCTGGGCGTCTAAGTTCCCTCATCGATGGTGGGGGCCGATCTTAGGC  
CTTTACACAGGGGCACGCATCAATGAAGTCGCGCAACTGAAAGTTGCTGACATCATC  
TTGGAACAAGGTCAGTGGTGCGTGGCTATCCGAATGACGGCAGACGATGATCTCGC  
CCAGTCTAGTGGTGCTCAGACCCGCCAACGCCTCAAAGGCAAGAGTGCAATCCGCA

AGATCCCGTTGCATCCTGAGGTGATCAATGCCGGCTTCTTGGATTTTCGTTGCCGACA  
TCAAGGCCTGTGGCCATCCCAGACTGTTCCCGCATTTGTCTGCCGGCAAGAACAAGA  
AGAGCGGTGCGAGCAATTGCCGGTATAGCCAAGGACTTTTGAACCAATTCAGCGAC  
TACCTCAAAGATCTTGGCTTTGCCAAGGGGCATCGGTTTCCATGGCTTCCGCCACACC  
TTGGCCACAGAGCTTCATGCGGCAGGCATCACGCCTCAGGACATCGCGTTGCTCACG  
GGTCATTTCGCTGGTTAAGAGCGTGCCAGTGCTGCAAGACCACTACATCCACAAATCT  
TCTGGCAATGTGATGCAACGGCAACTTGCAGCACTATCGCTCTATCAACCAAAAAGTT  
CAACTACCTATGTATCAGCAAGGTCAGTTCAGAGAAAAGCTGCGTAAAGGAGCGAA  
AATGTATCCCTGACAACTCAGTCCGTTTTTCGCGAACAGCTGGTCAGTTATTTTTGCGA  
AATTCTGTGCCTCAGAGCGGGATCGCTTCCGCTCTGACATAACCTAGGAATTCTTCTT  
GTGGATGACGTATGACATCCCCTGTGCGTTAGCCCCAATGGGAGCACCTCTTCGGT  
CCACATAAGTCACGACTAGGTTCTGCTTGGCGCGACTCACACCGACGAAGTAAGCG  
CTTCGGTTGTCGTTTTGATCGCCCCACCAAGTCTCCCGCTCTGTGCAAGGCAAAACA  
ACGCACTCAAACCTCCATGCCCTTGCAATTTGTGGATCGTCATCACCCGGACTGACCCT  
TCATCCAGAAATCTTGCCAGAGCTTGGTCCAGATCGTGATGCTGATGAATAAAATTC  
CCGAGAACCTCGTAGACCTGACCCAAAATTTTCGGCAACGCGCCCGGAATCGTATTC  
GGAAGAGAGCAACAGCAGTGTTGCAATCGGAATCAAAGCCATGACTTCCTGCAACT  
GCTCGAAGGCAAGCTCCGCGTGATCAGCAGAGAGCCCCCAGCCACACGATCGCGA  
GCGACACTAAGCAGCCTGATCCAGTCGCCTTGCTCGTCATCGTCCTGTGCAGTCAAA  
GCATACAGAACCGATGCGTAGGCGCTTGGCGCAGGCTTTCGACCAAGAACGCGCAA  
AAGGTTGACGACAACTCTGTGACGGGTTTCGGACACCAGGTCTTGTAGCGCCTGCTC  
ATTGCGACGCGGAATGCTACGACGATCCAACCTCACCGTCGATGGCTTGATTGAACAT  
AGCGCTTTTGGCGAATGTGGAGGATGGCGATCTCGTGCGGTGCGATGCCTTCGGCAAT  
CCATTCTCGATCTTTTCTGCAATACGCGCAGCCTCTACCTGCTCATCAGCGAAGTG  
AGCCAGATAGACTCTCCCCTCGTCACCAACAATATCGTTCTCCGCCACAGCCGAGAC  
CGGCTCCATCTGGATGATCATTCGGTTTTTGCACCCGACGAATGGCAGGAGCAGACCG  
CCAGTTCTGGACAAGCTTCAACGGCACAGCGGCGAACTCATCAGCAAACCTTCCCCAT  
CACCCCATCGAGCGCCCCGGCCAGCCCATGATCTTTTGCTTCGCGTCTCCCACAGC  
TGTGATCGAGGTGGAGGTATCCTTGAACAAAGTGTGGATCAGCTTGTATTGCGCGCT  
TGTGCAGTCTTGAACTCATCCAAGAACACATGACTGTAAGCCATGTTGATGGATCG  
CTTGATCATCGGATGCTGCTCGATGAGTTGTTGCGCCAGAGGCACCAACTCCTTGAA  
CGCTACTTGGATGGCATTGACGCGGGTCACGCCGACTTTGAACCCATGATCCAGCCG  
GTCCTTCGGCTTTAGAAGCGGCCGGTAGATCGCGATGATCCGACGTGCAAATGCGTC  
GAAGGTCATGCTATTGAGGCGATGGGCGTGGTCAAAGCCTGATCGATCCCTGACGC  
GCCTACGAAGAGTGTGCGCGGCGTCTGTCTTGAACGAGATGGCCAAGATCTTCTTGG  
GATAACGGCTCGTGCCTGTCCTGAACAAAAAATCGGCGCGCTGAGCCAAAAGCTCC  
GTCTTCCCTGATCCGGGATTGGCAATGACTATGCTGTTGCCATGAACTGCCGTAATC  
GCAGCCTTCGCTCCGGGCTCTAACATTTTCGATGGCAACTGGACTCCACTGAGCTGGC  
GTAATCATTCAACATCTTCCGCCAACATCGCGATCACGCGCTTACACAAATCCTTCA  
ACGATTTAGGCGCCCCATTTAACAGTTGCTCGTCCGTAATCTTGGACATCGCTTGTA

AGTGGGCTGCGGGTTTGCTGCCTAACTTGAAAATTCGGTGATAGTCACGAAAGTAGC  
CCTTATCAATGGGCTCGAACAGTTCGAACTTCCATTCTTACCCAGGACCGCTTTTGC  
AATGCTTTTCTTCTCTTCTTCGTCCGTAGGAACATACTGGTCAATCCCGTATTTTTCA  
GGGAATTCATAATCATCGCGTAGTCAAGGTCAATTGGCGACTCAAAGAAGACACC  
GGCCTGCATAAGGAATTCTCGCTCTGCCTTGAACCTCAGGGGTTAGGCAAGAAGCTTT  
CCAGCCGGGCATCACTTTCAGCTCAGCTATGGTGCGAATAGCATGACCATTCCGATA  
AGAACGCAGATATCGATGAGCAGTGC GGATGCGCCCCAGCCGCCACCAAAGCGTC  
CGTAGTCAAGGTCCAGAAGGGTCACATAAGGCACACTCAGGCTCGATAAAAGCCGC  
CAGAAGTGATTGATATGACGACCGCCGAGCGGAGCCACGCAGACGCTGGCAGCGTC  
AGCCTCGATGCCCATAGCGCTAAGCATGCGATGCAGCACGATGTCTTCGCTGTCGCC  
CTCACCCAGAACGACAAGCTTGGCGAAGTAGACCTCCGGATAGGCCATAACCGCTT  
GCCGAACGAACTTTCCAGATTCTTGCGCCTCATCCGGAAGAACAATTTGGCTGACTT  
GTGTGGTTCGATCAGCATCAAGCCGCAGATGGCGGATCAGATCAGGGGTCGCTCTG  
CGCAAGATAGCGGGCGAGTGC GTGGCCACAATCGCTTGCCCTCCTGACTCTTTTTTG  
AGGTCTCGTAGCGATTGGATGACGCGACCTAGATACTGGGGCGAAAGACTGTTTTCA  
GGCTCTTCAACCGCCAACAAAGTGAACGCAGCCGGCCTCAGCCGTGCCCGGTCGAA  
AGGGGACTCTTCGTCGGCAAACGCCGCGACATCAACCGCATGTGCTGCCAACACGA  
GCGAGATGTAAAGCAATGACTGCTGCCCGTCACTGAGGCGCTCGAAATCCACTGAG  
GGCGTTTCGTGACCGGGCGAGAAGCGAACACTGACTTGCTTCAACACCTCAGCGAG  
CCCGCCTTTGCCAAAAGCGATACTAGGGGCGGGCGAAGAAGTTCCTTGTGAAGCTT  
ACCCACCCAACTGTAAAGTGCTTTACCAAACGCTGCAACGCCCGCATTTTCGGTGAC  
TGCTTCACCGAGCTGCCCAGATAGATCGTTTGCCCTTGGTGCGCTCAGCGGTCCAGTC  
TGCCGCTCGGAGGGGCCCTTCCGAGCAGTGAGGCTGCGCTGTATGCGATGTGATCGGC  
TGGGTTACGCCGGGCCGGGAGATAGTGAACCTGGATGGCTTGCCGATCCAGCTTGG  
GCATACCTCGAAGCTGCGTAGGCGCGCCGTCTCGTCGGCTGCCAACACGTATTCTA  
GGCGTTGTTCGATCTCTCCGCTTTCATCCATCTCAGCCGTGAGGCGAATGCGCACCC  
CGGGAAGTTCGCCCCGCACTTTGGAGCTGCATGTGAGAGAAGAAGATCGGAACAGCT  
GCGGTGCCCTCGCCCTCCTCGACCTCGGGAAACGTGAAATCTGTCTCGATCCATAGA  
CTCGCGGCCTTCCCCTCCGCTGGAAGTTCGCCCATTGCCACATGGAAATCGGAAGGG  
AGCACAGCGCGCATGCCCCCTGTGGTGCCGAACATACGCGCCAAGGCCGTTAGAAC  
GGCGGTCTTACCCGCCCCATTTGGGCCTAGAAGGTAAGTCATCGAATCCAGCTTAAC  
TTCAACTGGTTCTGGACCGAAGGACCAGAAATTACTAATCCTGACGACTGCCAGCTG  
CATGAACATCCCCTGTTCCGCCCCCTATGGGCCTCCCTATCGTAACGCTACTGCCTGC  
CGTCTGAAACGTAACGCATCGACTTCAAGATTTTGACCTTGCGGGCCGATAAGGCCTC  
TGTGAGGGCGTGCCAGGGAAGCGCACGGCATGGTCTCGCGCTCCTCAAGCATCGTT  
AGGCAGATTGAAAGGAATCAATATGGCAGCAAATATCCAGAAGTTTGTACCGATC  
GCGGCATTAAGGCACTCTTCCACTTCACGCGCGAAGAGAATTTGGCTTCCATCCTTA  
GTCGAGGGTTGCTGCGGCGTGATCAACTGTCTAGCTCAGAAGGCGCGGTCTTCAATG  
ACGACCTTCGCCTTGATCGCACCTCCGCCATCTGCCTCTCAGTTGGCTTTCCCAACTA  
CAAGATGTTTTACCCGCTCAGGATAAATAACCCTGACACGAAGTGGGTGGTCATAGC

GGTTACGCCTTCAGTGCTTTGGATGCTACCATGTGCTTTCTGCACGACCAATGCTGCA  
TCAAATGCGGTAACAGCAAGCACCTTGGCTCAACGGATGGGCCTGGCGCCGTTCCA  
GAACATGTATGGTGATTGTAGTGGAAAGATAAGAAGCTCCCTCGGCATTCCCAATG  
ATTATCCCACTGATCCGCAGGCGGAAGTTTTAGTGCTTAACGATATTCCACCGGCAT  
ACTTGATGGGCTTGGCCACCCACACCAGAGAGGGCAAGGATCGCATCCTTTTCGAGG  
CATGCGGGCACACATGTAATCCACGCACCTACCCTTTTCAGTGGTCGCCAGGATTTT  
GCACATTGGAAACAGGCGACCTAAGCGTGGCGACTCGCCCCATCTTCATGCCGAGC  
TTCGATGGACCCATGCTGGTCTCCACCCGTCATGTGGAGTTCCAGTGGCACCCAGGC  
ATGGCCATAAGCCAGTCGCAGAAATCTATTGCATCACTTCACGACCAAGCAAAACG  
GCAGCTTGGCGTTGATCGAGTTTTAGAGATATCCAGCAAGTCACCCGATTCACTTGG  
GGTTGATCTGAGCGCTTTCAACTTGATGATCAAGACCGTCAAGCAGGAGCGGGAATT  
TAGCTTGGAGTGTGCATTCCAAGCAAGCAAGGTCTTCGAAAATGGGGGGCCTTACA  
AAGATCTGTTGAACGCGCGATCCCTCGACGCCAAGCGGGACCCACGCCTAAAGGAA  
AGCGGCCGATTGATCAAGTTCCACTTCTTCAATGTTGATTGGGAACTAGAACCAAGA  
ACCGCATTCTATGACTGGCTTTACATGAACGCCCTACACAAGCAGCCCGACCTTTC  
GAACAAGTGCTCACATAACGAGCATTTTTCGGACATCGCGTTTAACCCGGACAAGTCA  
GTCAATTGCCAGGCCTACGCCGCAGCGCTTTATGTGTCGCTTCAAGAGCGAGGCTTG  
TTGAGCGAAACGATGCTCAAAGACAAGGAGTTATATCTGTTCGACCGTCAAGACAGG  
CGTCATCAGCAACGCGCGCGAAGACAATACTGTCCAAAGCCCACTGATTTGAGTTTT  
CTCACCCCGTCGTCCATTGGCATCGCCTTTCTCCAATTCTTTGAAGCCCACCAACTGA  
TCTCCTTCATCAAAGTTACGGCCACTTGACTGCCGGCGTAACCCCTGAAAGCATGCA  
AGGCAAGACAGGGGGGTATAGTGGACAAAGCAAGGGGACCGTCGGAGTGACCAGGAC  
TACACGGCCCAACAGGTAGCTGATTTGGATCCGTCTGCTCGCCGGGCATTGAAGCTC  
CATCTGCGCTGCCCCTATTGCGAGGCAACCGCTCATTTCAGGTCAGCGTCGAGGCCC  
AGCCCAGGGCGACGAAGCAAGGTCGCGCATTTCTATGCCCTACCCACGGTGACGA  
GTGCGACATCACCCGAAGCTATGGTGATCCATGGGAAGACGATGATACCGATCGGA  
CTGTGGCTCATTGGGAGCAGCGAAACACTACGCTGATTGTTTCGATTTTGACCGATC  
AAGATGAAGGCTCGGCCGATAACGCCTCAACGGGTGAACCAACGGAGAGCGAAAG  
CCGATCTCGTGCCGGCGGCGACCAGACCCGATCGACGAACTCGGTATCGCGCGGTC  
CTCAAAGCTTCTTGAACAGCTTGTGCATTGGCCGAGCTTTAAGACAAGCGCCATGA  
TGATTGCGATGCCAGGCAATGACCGACCTGAGTTGGCGGTCCATGACGCTTTTGTGC  
GTTTTGAATCGGCCAGCATGGCGCAGCACACCGGTCGCTGGCTAGGGTTCTGGGGCC  
TTGTCAGATCTTGGAGCATCTGGCAGGGCCATAACACTTACTTTTCCAACCTTCGGCC  
CCACGCACCAGAGCTTCCGTATCGCCATTCACCGGGACAAGATCCCCCGATCCTCG  
CACGTTATGGCCTATCGAGCATCGATGAGATGGTTGGCCACTATCTTCTCATTTTCGA  
TTACGCCCCGAGAGTCAGGCTCAGGGCGTTTTATGGCTGATGTCAATTCGGTGCATCA  
CATCGGATTCTTGCGGAACGATCAAAGTAGCTGAGTAGCTCATCGAACACGACAAC  
CATGCGCCATAACGAAATTGTCCGATCGAAGCGTTCCACCTCGTTACCAGAAGACCC  
GAACAGTGCGTCCTCCAGACGGTCGTGGTCCATCACACGCTTCGTCTGGTAGCCTAGC  
TGCCATGACGACGCTGGCTGGAATCGTGCTTCACGGATGCGGACATGTTGCCTACAC

GAGCTATCTCAGAGCCTGGGGCGTTCAAGCCGATCTATTTCCCCAATCGGCCGACTG  
GAAGGTTGTTTCGCGGCTACTATGCCGTTGTGCTTCAAGGGTTCGGAATGTTTCAGCGC  
TTTTCTTGGGGTTCAATAGCGATCGCTTTTTTTACGTTATGGCTAGCTATCTGGGTT  
TACCGCCTCCCCGCACAATCGGTTTCGCAATGGTCGCCTTCAAGATTTCTATCGGCGT  
CATCCACGAGTAAAGCTTGGCCTCACCTCAGGAGGTATAGCCTTTTCGGGAATTTAT  
CTAGCATTGACGCTGTATTCCGTTGGCTTGCTCGTTTCAACAATCCCAGGCGTGATTG  
GGGAGCGTTACGGAAAGAAGGAAGCAGTTACTGAGAAGCGTCGCCTCCTTGGTCCG  
GTATCGCGAGGCGATACAGAACTCTGGGAAAAGGGTGAGCGAAAGATCCGAGGCC  
ATATCATTGCCAGCAGCTCTGACCTGATCGCCATCTATGACACTGACCTCCATCAGG  
TCCGAACCCTCTCGCGTGGCGATTGGGAGATACGAAGAGTGGGTCTTTAGGAGCAG  
CGGCGTGAGGAAGCTGGTGACATCCAGGCGCATTTTCGACAGCCCCCGCTACAAGCG  
TGCGCCGCGAGCAGGGCTCTTCTCTATTGAACTTGACGTATTGCTCTGCGCAAATCT  
CTGGCGCTCGTTGGATTGAAGCTCTCTGTGCTGCTTCGTAGCCTCGACTTTGACGATC  
AAATTGTCTAGCTTTTCTTCGATCTCTTCGTCCGAGATCAATTCACGCACGTGATCTA  
AGTTCACTCGGCGAACCAGAACATCCGCCACTTCATCATGGTCATTTTGGAGTGCAG  
CAAGCAAGCCAGCCTCTGGATAGGCGGTCTTGTGGGCGAACTCCAAGATCGACTTG  
ACCATTCCTGCATCGCCCTTCGTTGCTGCAGCGAACAGTGCTTTCTCGCCAAAGTCG  
CGTGGCGCATGCCCTGTTCTGACGATCGCCCAAAGTATCGTCCGCACCAGCTGTTCA  
TGACCTTTTCGAGCAGCGACGTTGAGACCCAACGAAAAGGTGTCTTCCGGATCAGG  
AAGACCAGCTTCGATCAAGAGCTCAACAACCTCGGCATGATTGTTCTCGGCCGCCGC  
CGCAAAGCCATGCAGCGCACATTGGATCTTCGATGAAAAAGGCAACAAATGCTTGA  
CCGCTTCCAAGTGGCCTTCCCGACAAGCGGCGACCAGCGCTCGACTGTCATGGGCTT  
TAGCATCTGAAAAAACGACCAGCTGAAAGACCACATCAGCATGACCATGGCGCGCC  
GCCTCATAACAGCGCCAGTGAGTCGTGTTGCAGAGGGCTGCACTCTTTGAGCAGTCGT  
TTGACGCACTCCGTGTGCCCGTGCTTGGCAGCAAGCACCAATGCCTCGTCATCCTCT  
GCGTCGAAAACCTCCATGAGCTGCTCAACTGCCCCGCGCTGAACCCGCCTTGGCGGGC  
ACATCAAGCGGATAGACCGCAAACGACTTCGACAACAGTGGCACCAGTTGATCAAC  
CAAGCCTTCTTTGCCGCTCTTGATCGCTACCTCAACGGCGTAGCGTGCCGCAGCATC  
AGCATCATCCTGAGCCCGACAAAGCGACTGCACATATGCCTCGCTTCCCCGCTTCAC  
TGCCTGTCTAATACTATTTCTAATTGCCTGTTCCATTTTCATCTCCTTCTATTCAATCTA  
AGGCCATCACGCCTTCCGTCAAGACCAAAGCGTGATGGCACCCATCGATTAGATCG  
GCAGAACTGAACTCACAAATCGTCGATGTCAGGAACATGGTCCTCGTAGTCACAC  
GCAATGAGCGTGCCGGTTTCATCTTCGATGCGATGGATCTCAGGTGCGCTAAACCAT  
TCTTCGAAATCGAAGTCACTGTTTCGCAATCGTGTCGACATCGCATTGAGCAAGCGCC  
TCCTGCGGCGAGCTTGCTTCAACTGTCATGTAGTGGGCGACTTGGACCGTCGCATTG  
ATCTCGATGGTGTATTTTCATCTTGCTCTCCGCGCTTGACGACTTGCCAAGCTTCGGAA  
CGCAATCTATGCATCGCAGACGCGTCGCTACAGGACGAAATCGCCACGATCGCTGA  
ACATCCATTTCATCCGTGCGCGATAACGCCAGCGCCCGGATGCACCAGGCAGCCGAT  
ACGTGGGGTGGGCCCGCGCTAAACGGGCTTCGTGTCTTCGTTAACTCTTGCGCA  
TCCAGCCACGCCATCTTGATGCATGGACCGTCATCAGATGAGAGCGGTAGGCATTT

CGCCAACGCCTCTTCTCGGCATTTGACCGCCAAGGAAGCGCCAAGGCTTGATCGATA  
GTCAGGGCCAAGATCGTTGCGCCTTGCTGGAAAGCTTCTTCGATCACACTCATATCG  
AGCCCCGTGATGCCCCGATGTGAGATCACGCTCTTGATCTTGCCGGCCGACGCGCGG  
ATCACAATGAAGGGAATGCCCTTCCCCGTTCGACCGAAATTGCCCGAGATCGGCTCT  
TGGATCTGCTCTCGGGCTTTGGTGACTTGGGCATACCACGTCAAGAGTTCTACCTTA  
GCAATCGAGCGTGGCGTGCTCTTGCTGATCAGAAACGGATTGCCGTGCTCACGCTTG  
AACTGGTTCGAATTGGCGTCTCGGGATGCCGAGGTAGAATTCCGCCATGGCTTGCGTG  
AAGCGCGTCGTGCCCCGGGGATTGATCAAGTATCTTGCGTAGACTTACGAAGTCTCTT  
GCATCGATGATGGCATTGCGCTCATCGCGCTTGGCGATGACTTCAAGTGCCGCGCGG  
AGAAATCCTTCTTCGAAGCTTTCGCCTTGCCGACATTCGTCATACGCCCCCTCTCACT  
TTTTCATGCCTTACTGGGAGAACCTTGCATCGTAAGCTTGCCAGTCATCAGCCTGAC  
AGCCTGTGGGCGATGCTATGGAGCAAAGCCTAACCTGTTCTGTTGAGGAAGCACAGC  
GAAAAAGCCATCCGCCGTCGTAGCGACCCAGTGCACGGCGTCTTTGCTACCTAGGGT  
GATCGCGAGTTGCATGTGAGCCATCACGACCAGCGCGTTGCTTTGTTTGACCACAAC  
TTCAACGAGTTCAAGCGGGAAGCCCGTTTCGCAACCGATGAAGCGCGTGTGCGCCTG  
CGTGGACAAACGAGTTGAGCGCCACCCAGGAATATTTCTTAAATTCCAAAAACGCG  
CGCAACGGCTCGGCTGCCTGCTTCACCGCTTCAAGAGCGATCAGCATCTTGGATAGC  
ATTGGCAAACGAGCCGCTAGTGATTCACTTGTCGGTGTCAGCTCTTCTTGTAAGCAG  
GCCACCTCGGTATCGCTTGCGCAGTAAAGGACCCACACGGCGCGCACCCAGCGCTTC  
GAACTGCGCCCCGATGAACGACCAAGGTGGACGGCTCAGAACC GGCTGCAAGTAAGC  
AGCGACTCGAACAGCGTGCTCAATCGAAAGCAGGCAAAGCGCGCGACAGACTTGC  
AGTCGATCACTTTGATCAAACGGCGGAGCCGATGTGATGGGCGCCAATGCCTCCAA  
CAGCTCATCAGAACCTTCAAAGAGCTTCTCAACCTGCTCAAACATCATGCCTCCCCA  
AGCATTGAAACAGTTGGATCGCATCCGGGCGCATCAACAACCTCCCTCCTTCGATTTT  
TATCCATGCCGTAAAAATTTTCAGCAGCATCTCTTTCACCTGGATCTTGCCGTAATGG  
CGTCAGCGGCGAAAGAGCGTGATGACCGAACTCAAGCGTAGCGCCATATCTTTTGC  
AAGATCAGGCGCACTGGTGGCCCTATGCCAACAGCCGATGAGAGAGAGAGGGGAGG  
GCTACGCCCACCCTCTTGCTGCAAGGCTGGTGTGCTGACGCCCTCCGATCACCAGGT  
GGTCCAGCACCCGGATGTCGAGGAGGCCCAGAGCCTGCTGCAGGCGCTCGGTGACC  
TTGCGGTGCGCTTCGCTTGGCTCCGGATTGCCGCTTGGGTGATTGTGGAAAAGGATG  
ACGGCAGCTGCGTTCAATTCCAGGGCGCGCTTGGCGACTACTCGGGAATGAATATCG  
CAGC

>CONTIG\_12\_length\_15137\_cov\_11.539574

ATCCACACCATGCCCAGAGCCGGTTTTACGTGCAGCGAGCAATTTTCATGGCTGAGA  
GTCGGGGCTAATCAGGAGATGTTATGTATTTGCAGGAATGCACTACAACGGCCTGAT  
GACCAGATCGGCTACTTTGGTCATTTGCGCTATGACAGGCTCGATGTGCTTAGATTC  
ACCATTGACGTGCTTGGCAATCTCGGGCGTCGCTGGAGATCTACCTTTCCTGCGCAGC  
TTGAGCGATGACCAAGCGCTCGGGCAATCAGCAATTAAGGCGATCCAGCTGATCGA  
AGGGCGTATCAATAACGTGGGTAACTAGATCAATTATTGATATAGCGAGGAAGTTG

CCGGTAAGCGTACATCGACGATGTGTATGTGGATGTTCCCTTATTCGAACCTGCCGCG  
GTCTTTGAGAGGAAGGAGTAGTATCCCAACCAGCCCAAGAACCGCCATGCCATCGC  
CGATTTTCGCCCTATGACGCAAAAATTTATTCACCTTCGGCTGGTTGGTGCTGCACG  
AAGAGGAAATTCAGCGACGCATGACCGAGAGAGTCTTTGATAGACGCATTCTTTCA  
GCCAAAAATATTACGCGCAGCGCAGCGCAGCGGCACAGCTTGAGTGGGATTTCAGGG  
TTGCAGCACGCTTACACCTCGTAACCAGCGGGTTACGCAACCAGAAGAAAGCTATA  
GAGCCGGAGGATTGCCGACTGTCTCCGCATGAGCAAGACTGGGACGGTGCACTTCTT  
TGGGCAGGAGGCCCCGGGCTGCGCGCCGTGGTCTTCCAGCGAATTGAGGATTTAGA  
GATTATGATCCAGGCAGTGATGCACTGATATCTCCGAATATGTTCAAGGGCGAGGCG  
GAGTGAGGATCATGGGGTCAGGCAGTTGAGCGAATAGACGATCAGCCGCTCCATGA  
CTATCAGTCATAAAATCGACGTGTGTATCCATGCACTGGTTGGCAATATCGAAAAGT  
AAGTCGCGCAGTGGGCAAGAACCTCTTCAACACACGCGAAGGTAAGGTTGGCCCCG  
CTCCCGTACTTCGCTATAGCTCCGAGCGGTTGTTTGGTGGCCGACCACTTCGTTTCGC  
ACCATAGCCACCTTTAGCCAAGAAGGCTTGATCTCATCTATCCGCAAAACGAATCCC  
TGCCTCAGTGCGGGCGTCATTTTGTTCGCGGGGATGGCATTAAATTAATTGCCAGAAG  
CTGACGCGATCCCGGGGGGTTTCGTATAGTGAATATGTTGCAATAATCGTAGCATCA  
TGCAACGCCGACTCGCATGTTTGAAAGAATCGGAGGTGCTGATTGAACTTGGCTACT  
TTGTCTTTTGCCAAGCGATCAATGTCCTTGAACAGGTCGTGGCACGTTAGGGCGCGA  
TTGAGTCGCATCCATAGGGCCTGCCTTATCTCAAGAGCCGTCAGGGCTGTTCCCTTT  
GACTTTCTCATGCGAGTTCCGTCATGGGCGATGTGCCGCAATGAGGTTGGGTGATAC  
ATGTCATGCTAAGCACTTAAGTTCTCACGCATTTCGAAGGGCCACTATTGGCCGAAAG  
CGGATATTAGCTCGTCAGTCAGCCATCGAGTGCTAGTTTGCCTTCTAAGTCTAATGC  
AGATGCACCGAGCTATTGCAGGATACCCTGACACTTAATCATGGCGTCCCGAAGCG  
CGTGATCAGGGCCTGCTCCAGGGCGGCCGAGGCCATGCTGGCCTTCCCGGTCCGTGA  
CAGGTGCCAGCCAAGCAGCTGACGCGTGCTGCAAGCGATCCCCAAAGCCAGGCTGA  
GCCAGCCATCCTTGCCTCCCCATGCGCGACATAGGTCTGTCTCTGTGCCCCAACGTT  
GATCCGGCTTCTGCGCACGCGATACCTTGGCCTCGACCCGCGGGCGCTGGCCAAGG  
GCCCCGCTACGAACCTGCCAGCCCTTGAGCTGGAAGACTCGTTGTACGGTGTCTTG  
TCCATGTCAAGCAGCGCAGCCACGGTGCGATAGCCAAACGACTGCTCCGCCTCGAT  
CATCTCATTGATTGGCTCAGCCAGCTCCGGCTACACCTTGGCGGGCGACCTGGTTGG  
AGTGTAGTGCATCGTGCGACGTGCCACGCCGAACACTACTGGCAGCAGCCACCGCTGT  
CTTGCCCTTGGATGATCTCAAGGACCAGAGCCGACTTGCTCCGGGGCGGTCCAGCGCTT  
GATCTCTTCTCCCATCACCTAGCTCATTGGTGTCTCCTTCGGGGAAAGTAACACCTGA  
GCAGGACTTTACTGGGTGATTACAAATCTGCTGCAAGCAGCTGGCGCCTTAGCAAAG  
CACTGCCACACAGGCCAAGCGGCTTGCTTGGTATCGATCAGGCCGGCTGGCTGTTGC  
CGACCCCTTTCCGCCAGACAAGTCCAGCAATCTCCAGGAGATCCTTGACGTTATCAA  
GCAGCATCATGATCTCGGTCTCAGTGGGGTTCCATCGGCAGGAGAACACGTTGGCGT  
GCGAAGCGTTGACCGAGTACAAGCGGTAGATGGTGTAGACAAAGTCCAGATCCAAC  
GCGCCAAGAATGTTGTAAACACTGATTCCGGGGTCAGCGACCTGATTGTCTGTGTTC  
CCCAAGAACTCGGCAATGTGCTGTCGATTCTCCTGCGTAAGCACATCCCGCCCCGCC

CTATCATCGCGACGCTGCGCGCTGTCTGAGCCCCTTGGCGTTCTTATGGATGTCGGAC  
TTGAACTGCTGCTCAGCGCCTTCGACAGTGATCACACCATTGACCAAGCCGTACATG  
TACGCGAAGTGTTTCGATCGAGACGCGATGAACCATCGCGGCCGGGCTACCATGGTG  
GGCACTTGCCAGTGACACCACTACCTTACTGTTGGCGATCAACTTCGCCCAGAACTG  
CAGCGCCAACCTCCTGATCTTCACCCACTTGCGGCGCCAGCTCCTTGAAGTGAGCTTC  
TGCCTTGCGCACAACCAAATCTGCTTTATCCAACGACATCGCTAAATCCCTCTTCTGT  
TGCTCCTACGAAGCGTTGTGGTTAATAAAATCCTGGGGCGAGATGGGCCTCAATCGC  
CGACCAGTTCATCAAGTAAGTCATCAAAGCCGCTCGCTTGATCCACACGCAGCTTTT  
CAAGATGAGCGATGTGATCGGCGTAGACGTCCGTGAAATCCGCCAACAGCGTCGGC  
TGGCCAAGTGCTTGAAGCGAGGCCACGATACGGTCAGGAGACTTGGCGAACTTCCG  
GGCAAGGTACTTCGGGTCGCGCTCCTGATCGTATTGGTGTGCAGCCTCCTCCGTATC  
GGGTCGGGGGATCAAGTACGAGTCAAACCTCTTCGGGCATCACGTCAGGGAACGCAA  
CCTGCAGTACCGCGTACAGCGAAGAGCACTCTGCCTCACTCAACGACGCAGTCGAG  
GCATGATCTCCGGAGTAGGCCAGATGGAGCATCTCAAACACCCCGCGGTCGAGATT  
CTTAATGGGAATTTCTTTACCAACTATGTGTGATAAGTGACGGGATGATTTGATGCG  
CTCGATTGCGCTAGAGAGGGCATTACTGCTCAGTGAGAACTTAGCCCGAATCCTCGC  
CTTGGTGTCAATTGAAGGTTCCATCACCCCAAGTACTAATATTTGGCAGTTCGTCTGCG  
ACCTTACGAAGCGTCTCACGCCCTGATGGGCCCCGAAAGGATCCGCAAGCGGCCCTC  
AATCTTTACTGTCATCAAGGCGTAGCGAAGGTCTTCAAGAATCTTGCTCAGCTCGGC  
ATAGCCCTGAGCGAAGTGGGCCAAGTCGATATGGTCTAGCGCCTGTAGATGCTGCTC  
ACCATCATCGGAATCAGTCGCATACCTGAAGACCTGCCCAGTCGAGTCAACGGATTTC  
GAAGTCTTGAATATACGGCTCCAACGCCCCGGCCAAGACTTTGAGACGTTTCGTCCGT  
TGCCTTGCATATTTTCATCAAGCATCTTCCAGTAGAGCTTGATGCTGTGCTTCGTGCCT  
ATCTCAGGCTTGGAGATCCCCTTTTCGATCATTGGGAGACCTCAGCCTAAACGCATTC  
CACGCCAGCGCAAGCATGTGTTTGATTGCCAGCTCAATATGATGCCGAGCGCAATAG  
CAGATCGGGTACACCAGCAAGTCTTCTATACGGCCACGGGCCCACGTCGATCGAGC  
ACCTGATGGTGGGGCCAGTCCAAGCGACACCAGTAGAACTTCTGTTGCCTTTTCGAA  
GCCATCAGCATAGAGGGGAGCATTCTCGGCCGACCCTGTGTTCTCTCCACGCAAGC  
GTTGTAATGGGGGTCAGCGCCGGCATCAACGGCGGAACGGAAGAGAGCTCCGGAGG  
CACGCTCTAGGGGCTTTTCATCGCCCATATATGCTCCATCCTTCGCTCAACAGAAGTT  
CGAGGCTTCGGATGGTGAGGCGCACCGCGACAACCTGAACACGCCAAATGCATGCCG  
GGGCTAGACCCAATGAGCTTCAGTGTACGCAAACCTTGCGCACACATGGGGACATG  
CCAATCCAGCTTAAGGCACAGTCGTTCTGTGCCTTGTAACCTCTTAAGTGCCTTCGAT  
GCCACGTCCGCAGCAGATGCGCTACTAGTCATCACCTCTGGGTCTTCATTGGCTTC  
TAGTCCGAGCAGCTCAATCATTACATTGACCAGATCACTGTCAGCGTCTAAGAAATG  
CTTGTTTCAGCACCGTAACATAGAAAGTACGGACATCCTGATCATTTATGATCCGGCT  
GATCTGATTGTTTGCCGTCGCTGCTTCGAAAAGCTTGTTTGCGTCTTCCACCGTAATC  
AATGGAATGTGTGCAGTTAAGTCGGTGATGGCCTGGTGTGTCTTCTGGAAGCTCTCG  
CTAGTGACAAGTTTCTCGATTGCCACCTGCTTAGCTAACTCAACCTGTGGATCCACA  
ACCGGCGCTACCTCCTCAGCGACGGGGTTCTGTTCCGCTGGCTGGGCAACTTGGTTA

GGTACGAGTCCAACCTGACTCTGAACTTCTTCAGGCTGATCGACGAGATTCTTGTA  
TAGCTGAGAAGCGACTGGATTGATGAGTAAACGTACAAGTTACGACCAGGGGCCTT  
CGCCGCCCACTCCTTCACCAAGAAGGGCATTGGACGAGGTTGCTTGCCGATAGGCTG  
CAAAGGTGTGGTGAAGTCGCCATCGTTGGTGACGACGTGGAGATCCTCGTTGGGGA  
GGGTCGACAGAAGCGTCTCCCAATTGTATCGGTCGCCAATGTTGCCTGGCTTACCTG  
GAGGATTGCCCTTGTGCATTCTGGTGATGGCGCGGGATAGCGCCATTTGCAATCGT  
CGTGCTTCACCGAAGCGGCAAACAACGCCCTGATCCGGTGGTCGACTTCAAGATCTT  
CCAAGGCCGCCAAGCCAAGTACATTGCCCACCAGCTTCTTCTGAGCGGCAGCGGCG  
GTGTCCAGAGCGGCTTTGTACTGGATCGCAGTATCCATCTCCCTCATATGATTTGGG  
ATGCTCGCTGCCGGCTTCGCCTTATTAATTTCCGTGACCACCGTATAGATCTTTGACT  
CACGGTTGCGCCAGAACTCGTCTCAACCTGCTTGGGAAGATGAACAATAATCTGAT  
CTGGTCCGACAAGTTTGGTCAGGTTCTCAAGATGAGACGATTTGTCCTCTGAAAACG  
AGTAGAAATTTAGAAGTATGTTTCGTGTCAATGAAGACGTTAATTGCGGGCATTGTAG  
TTCCCTTACTTATTCCTGTTAAACGCAAGCTCTCGCGTCCTCGCTAGGCGCCTCCGGG  
CGCAAAGGGCTCAGCACCTGAGCGGCCAGTCGCCGGGGCTACTCCGAACGGGGCGC  
AACTCATGCATCTTCGCATGTACACGCGCCCCGCCGGATTTCTTTAGGGTCCATGA  
AGCCGACCACTGATACGCCCCGAAGTTCTGTGGAGACTCACGACCCTCGTTGCGCGTA  
GTGCCGTTCAAACCTCTACAGGGTATAGGTCCTCCGTTGAAACAGTGTTTCGCGAGCGA  
CTAGTCTATGCGACCTGGTGATAGTTCGGACTTCGAGCGCCAGTCGGTATCGTATAG  
GAGAGCGTCGTCGGACAGCAGAACCACACTACAGCCTCGAAGAAATTCGCGCGTGT  
CAGGCCCATACTTTTCAGCCTCGTCAATCGCAACGAAGGACTGCTTGTGCAACTCGG  
CATAGAACCTGATGAGCTTCGAGACAGAGTCATTTTCGATATTCTTAAAGATCAACG  
AGTCATGCGCTATCACCGGAAGTTGCGTTTCGTCAAACATTGTTAGGTCAAAAAGAA  
TCAAGGCTACGAACGCCGCGCCAGTATCCGTGTCTTCATGGACATCGAACGTATAAC  
TTGCCTCCCTCAACGTCAATCGCGGACTCTTCCTACCCTCGCCAAAGATTGCGCTTGC  
TGTTGCCCTCATGCCGTCGTTGAGAGATTCTTCGATTCTCTGAATCACGCGTACCTTC  
TCCTCCGAAAGAAAGCTCTTGAGCTTCGCGATGGATTCCCTGAGAGCAAGACCAAG  
CTCATAAAATCGATTCTGATCCTTCGCCGCTGCAGGGAATTAGATAAGCCAACCAC  
CCTATCCAGTACGGCGGTTGGTTTCATTGACACTTCTGAGGGCCTCCGAGATCGTAGA  
ATCAACCTCCGCAATGTCCCCGTCAACCTCAATCAACTGATCCGAAAGTGATCGCTC  
TGAGTCGCACAGCTCAGCCCTCAGGAGCTTGGCGACTTCGCTATGAAACTCCTCGAC  
CTCCGCAAGTCGATTCTGATTCACCTCGGGGAAGTAATGAGTCAATCCATCAAAGTG  
CGCACTCTTGATATGGCGATTGCTTTCCAAGTTGCGCCGAACCTCTCCGTAGAGAGGC  
CTCCACCCGTGATCTAGTCTCAAGAAGACCATCACGCCTCTGCTTCTGCTCCACCAT  
CTCACGATTAACGATATCGGCGATGCTGGTTGCATAGAGCGCCAAATTAGACCTGAT  
TGCATCAAGCTGCTGCTCAAGCGCGTCGATGCTAACAAGGTTCTTAGCGTGCTCCTT  
CTTCCCCACCTTTGGCAGAATGCTCGTTGCCACCGCATTCTCAATGCTCCGGATTCC  
TTCTCCTTTTCAGCCAATGACACTTGGAGATCCCTGATGCTGCCGAACAGACCAAAT  
GTCTTGATCAGGTTATTAACACACTCCCTAGGGGGCTGCGCCTTGAACGCATGCAGT  
GGAAAGCGAGCATCATCGTTGCCACGGCCCCAACTCGAAAATACGGACCAAGTAA

TGCACGAAATGATATGTCTTCTAACGTGATGCGGAATCCGGCCATCAGAAAGGACC  
GGTACTCCTCAATAGTCTTGACGCTGACTATTCCGTAAACCTCATCGCAGACATACA  
CGGTGCGACTATCGGCCGTTCTCGCTGGAAGCGAAATGTCTCCCTGCCAAACTGAA  
AGGAGAAGCGATAGTCATGCTCTCCCAATTCTGAGACTACATCGCCGTTGTGTTCAA  
TGAGCGACTGACCCCCAAGAACAAAGTCTACAACCATCAGCAGCGTCGACTTTCCG  
ATCGAGTTTGTCCCGTTTTTCATCACCGAGGACCACGTTCAAGCCGGAATGGAATGAG  
ATCGTCTTTTGACGAAATCTATCGCAATAAATCTCAGTCAACATAGGTAATCATCCT  
GGTTCCAGGATCAATATCAATTGCTCTAGCACGAAGAGCAAGTCAAGCGTTAGCA  
GGAACCTGGTCGATGCTGTCGAAGTTCTTGGCGACGCGCTGATACAGTGCACCTCACAC  
CTATAGGGGCAGAGCCCTGCGAGAGAATGAACACCGTCTTGCCTAAGGCAGAATCT  
TTGAGCCTAACGACTTTGTTCGGCGATATCACTCAAATACCTCGCAGTTTTGAACAA  
AAAAGGAAGCGACAATTTCCGCGGCCTCAATGGTCTTTGATCCCGACCTCTTATGGA  
ACCAATCCACAATGTTAGAGTAGATATCGTGCTTGGGGAGGTTGAGCGCTTTCTGCT  
GGAGATAATAGGACTTCACCTGAGAGAATATAAGCTCGGAACAGTTAGGGTCATCT  
TCTTCAAGCTCCAGGAATTTCTGCTTGATGAACTGAAAGTAGTCCGACACGTTCAGC  
TTTATTTTACGGCGCGTGATCGGAGATATCGAATCTCCAGTTTGCGATCAACACTG  
ATAGGGTTATAAGAAAGATTGGCTTGCGTCGCTTCCTGGGCATCATAGGCATGCAGC  
GCTATCACACCTTTTCTATCGCGTCTTCTAAGGGATACTTAGCACGCACCTCTATCT  
GAGCAGAAGCTCGAATAAGCTTCTGCTTTAGCTCATATAGTTTCGTGGTATTCGGATG  
CAGTGCGGGGTTTATCGAAGATTCCGTGACATCGCTCGCATAGTGGTATTAGGTTGT  
CGGGATGATTGACGTCTTCATTAGTAGAGGCACGCCCCGCAACACGACTCGCTCCA  
CTTCAGTGGGATTGAGCGGGTAGATATGAGCAATTTTCATACGCTCGATGCTGCCGAC  
CACCTTTCTCATAGAAAAGAGGCATCCAGCATTTTGGGCACGCGCCCCCAACCTGAG  
TGGTCAACCTGACCTCAAGGGCCTGTGGGAGCTTTTGTGCTGGGGCTTGGCCATCG  
GTCTCACGGTCCATGAGGTCCATTTGCGCCTCGCATGGAGACCAACACTTCCTAGA  
AGGTTCGTAATATCCCTCAACTCGGACCAAGGTCGCAACTGCAGCCAAGCCAGTCTTG  
CCCCACCACCACGGCAGGAAGGGGCAGGGCCGTTCTGACCAGGCCGAAGGAGTGC  
AGCGGGAGTGGATCATCAGGGAATACTATGGGACGCCCAGCAGGACAAAGCTCTCG  
TCGGCCTACCGCCTTGTCGATTGAGGGTGATTGAGACGCCCTCAGACCTTCACGAGT  
TACCCAAGCGGGTCTTCTCTAGCGGGACTACTTCCGCTTCAAATTGTAGTCTGGCAT  
CCCAGCATAGGGCTAATCTCCAAGCAGCTGCGGTTGCGGTGTCATATGAAATCCCAA  
CTGATGTCCGCCAGGACCAAAGTTTGCGGCGGCGCAAAGTTCCCATGCCAATGCC  
CGCGCAGGACGGTTAGTACTTCACCTTCCCGACCAGTGTGGAGCAACCTTCCCAGTT  
TCCGAGTGGCGCTGTGGCGGATTGCAGATGACGACACCATCGTCGGGCTGATCTCTG  
TTCGCCTTGGCTCCGATCATTCTCAGAGCCGGTGCGCCTGATGTCGCCTCCAAGAG  
GGAAGGGAACGCAGTATTTGCATATCGACGATCTTACCGACGACGATCGAGCAGAG  
ATCCCTAAGCGACGATTCTCTTAGATCAACGCAGATGGTCTCGCCTGCTTTGCAGTC  
CAGCCGGCCGCCGCTTAAAGGGTGGCCGGCACCGGAAGATTTGTTTCGTACTGCGA  
GACGGGAAGCCGGCTCTGTCCACGGACAGGGCCTGATCTGGAGCTGCAGCCAGTAG  
CTCGGATGGTGCCCAGCACCTAGCAATACGTAAGGAGCAATTAGCCGCTCTAGTCTG

GTACGTCGACATGCTAACAGCGCCGATCAGGCTGAGCGAGTTGCAGATTTACCGGT  
GCTATATGAGTACAGGGCGGCCGCTAACGAGTCTGTGTCAATACAAGCGTCACGCC  
GGTAACACCCGCACATCCCGTTGCTGATCTGCCGTCACAGGGGGCCGCCTTCTGTGCG  
GTTTCATCTGAGGTTGCCCCCTCCAGCTCAAGCACGCGCTGTGCGAGTTCAAGTACCC  
GGGCGTCCGATAGGACCAAGGCAGCCATCGCAGCTTCCCGCTGCCGAGCTGTCTCG  
CGAACTTGGGCCCTGAGGCCGATACACCCCGGACACACACTCGCAGCTGGGCGCTG  
ACGTATACCCAGACCAGCTCCGGCGTCCTCGTGTTTCGATGCGACCGCTTGGATCTC  
TGCGACTAGACTGGGAAACCGGCTTTTCTTCAGGGCGCTGGGATCGCATCCCGCCTC  
GCGAGCCACGTTGTTTTGCGTGATCTTGGCTCCCGGGTCGAGCACTCGGGGGCGCCC  
ATCGCGTAAACGGTGGAACGCATCCCGAAAACGCACCTCGGCAGTGGTCGGTATAC  
CCGCAGTTTGCTCAAGCGCCATCGATCAGCTCCAGTGATTTCTCAAGACTTTGGATC  
TGCGAGGTAATCTGATTACGGCGTGCCTCACCTGCGCCGAGTGCGACAGCTCGGTG  
CGCTTCTGGCTAAGAAGTTGTTCAAAGACCTGGCGGGCGCTCGCGATCCACCATCGCA  
TCTGTGCACGCCTTCGAGCTGTCCATTCCCATGCAGGGCCCAATGTCGTCGTATCCG  
CCTGATGGGCAAGAGGTAGCCTTCACGCATACGCCGAGCAATGTACGGCGGAAAAC  
AGGCGTAAAGATACCGCTCCCGCACCGCTCCTTCGGAGCGCCCGCGAGGGTTTCGAA  
ACTTGTGCTGCGGCCCCGTAGGGTGACACGAATCGGTCTTCAAATAGTTTCTCGGACG  
CCCGCGCCATCGACTCGAGTGCCCTCTTGAGGTAATCCGCTTGTCATGTCACGGCTGA  
TTGCCCTGGATGAGTAGCCCCGCCCCGTAGTAGATCGACATAGAACGACTAAGGTGCT  
TCAGTTGGTACTGAAGGCTGGCATCGCTGACGATACCCGAGGCGGACATGTTTACA  
GCCGTGGTGCGGCGAAGCTGGTGCCAAGCTAGCTGCCAGAGCGCGCCGACACTGTA  
TCGCTTGGCATTCACTGTGGGCGTGACGCGCCTCGCTTCATCCAAGTCGCCTGGCCT  
GATTTTCAGTTCTCTGTCATCAAAAAGCAGCGGAAATTGTTTTTGGCAGTTTCGCGTA  
GGCGTGGGCTGGCGGACGGATGTCTTCGTTATCGGGCCGCTTGCCATTGGCGGCCGC  
CCAAGGTTTCGTACACCAAGTAAAAAGCAGTTGTTTTCGCGCATCCAAGGCGGAGG  
GCCGCGGTGATGGTCCGTCTCGGGCCGAGCGGACTAACTCGAGTGCTTCCAGCGCTT  
TCTGGACATCGCGGCAGGTGATCCAGAGTGCTTCGTCTCGGTGAGGGTTTTGGTTCG  
TTTTGCCACGTATTAAGTAGATCGTGCCAGAACTTCGTCCGATTCTGCTATGAAAC  
AGCCACGCCGAGCGAGAGGACCTCCCCGATTTCGCATCCCGGTCAAGTTCGCAATG  
AGGGCGCTTGCGGCGAAACTGGCCAAGGAGAAAACGGAACCGAAAGACGAGAGTC  
GTAGGCCCTCCTTTGGGCCGCGCCACGTCGTCATGAACTCTGTAAGTCCGTGCTTGG  
CTAGGAAGTCGGCGATGGGTCCCAGATACCTTGCGCCCGGATACCGCGTACAGGCG  
CGCAGAAATGGAGAGAAGGCAGTCTTATCGAGTCTGCTGCTCGCCAACGCACAAGC  
CCGTTGGCCAAGTAAACCTCGCATGCTTGCTGGTAGGCTGCAGTGAGCCCCCTCCTT  
ATGGTGCAGAACTCCGTTAGGTATCGGTTGAGCCGGCCGAGCTGGTAGGCCCAGA  
TACGCGGCGGGATATATGCGGTCTGCCGCCGCACAGGATCGGGAAGGCTCCTGGAA  
AAGATGCTCATTGCCTTCTTGTCGAAGACGATGAAGCCGATTTGGTTTGACGACGTG  
AGAAGTGACTGCAGTTCCAGGAGGAGCGTATCGGCGAACGAGGGTTTCAGCTGCAC  
AGCGAATTCCTTACTTCGCACGGAAGCTCACTGAATTTCTTCAGATCGATCCCTCTG  
CGCGTAGCGAATCGGACCAGCATGTTGAAGCGGGCGTGATACGTGTGCAGCGACGT

CGGTTTGGTCGGGCGTCGCTCGCCGAACAGCCACCAAGCGGTGATCTCCTTGAATGT  
CTGCCTGTTACTCTGAGAAACCCTACTATGGTGTGAGGCCACCGGCGCAAAGTGGAG  
TCGACAGCTCTTGCCGGCCGCCGCAGAGAAGTCCCAAACGTCGTCTTCGAAACGGCT  
TATCACTTTTCCCGAGCCATCGAATGACATGGGCGCGCCTGGCGTAGGGGGCCATGC  
GGGAAGCGCGACCGGTGGACATCGATCGTTTGGCTGAGGAACTAGCAGCTTATAGG  
TTAGTCGCGTCATGGGAAGGCTCCGCTGCATTGATGATGTTCGGACCAGCGCGGATGA  
AAATCTCCTTCCATGACTCTATCCTCCGCCTCCTGCACGAGCTTTGGCCCGTGCCCC  
CTTGGATGCGCATTTGGTTGAGCTTCTCCGAAATGGCGGTGATCACGATTCTGGGAG  
TCGTTCGGCTCGGGCGAGGCCTGCCTAATAGGGGGGTAGGCAGCGAGTTCCAGTGAT  
TTGAGGTAGCGATAGGTGACCAATGACCAAGCATAGTCGAGTGACATCTCGTCACG  
GTGATCCAAACAGAACAGGCAGCCGGCCGCCGATCGGCAGTCGGGAACCTGGCTGGC  
CTAAGCGTGCAGGCATGGGCTGCGGTGACCCGCTGCAGGTGCCCGGACCTGCCGAC  
AGCAAGGACGAACCGAGTTCGTTCCAGAAACCTGTAATCTCGACCGTCGCTCGCTG  
GTGATGGGGGCGTTGGTAGCCCATCAGTACACCAACAGAGTGCTGCGCTACTGCTGC  
GGTAAGCTGAAGATCCTCGCTACGCCTCAAGAAGTAATTGATACGTGTGCAGCGCA  
ACTCGCGGGCGCCGATATAGGTCAACTCGGCCTGCCGGCAAAGGCGCCGGAGGCCA  
TTGCAATGGTGCTCCTGACGATGAGGATCACCCGGCCGGACAGCAAACGGGAAGAG  
GCGTCCGTCGTCCGGCTCAGCGACTGAATTGCGCCAGTTGAGGTATCGGTGCAAATG  
TTGCCTATAGCCATTGAAGATCTCAAAGGCAACCTCACCGCCTCTTCTGGCTTTGTA  
GACGCCTTTGACTAGGAAGCCACCCTCACGTGTTTCGATATCGGAATCGTAGAACGCT  
TAGATTGAATGCCTGTGCTAAGTTCATTCCGGTTTGTGCAAGGAAGATGGCAAGTTC  
CGCTTCGATCCTAAGATTGATTAGCGTCCGCCGCGCGGCCAGTGGCCCTGCCGCTAG  
CTTCCTTACTCGGCATTGATCAGGCTGCCATTTCTGGTCAGGTCTACCCTTCGCAACG  
TACGAGGCGCGCAAAATGTCGTCGGAGGGGATGCCCGACCAAAGCTCCAGCGACTT  
CTTTCCGAAGTCGAGCTTGAGTGGTAAGGGGCCTGTTATTGTTTCCGTCGTGAGCAG  
ATCTGCGATCACACGCATTAGCTTGCCAAACTGAAACGTCTTTTCTAGGTCCTGCTTG  
TCGTGCCGACTTCCACTACTCCGTCGAGGCGGTTTAACGAGACGTGCCGGGATCCTG  
AAAAGATTTCCATCGATGTTCGGTAGACTCGGAGAGCATCTTCACGAGGCGTGTGCGA  
CTTGAATAGTGAGAGATTGGTTTCCTGCTGTTGCGCACGTCTCCGCCCAAGCGATG  
AAGATGTCAATGACGTTAGCAATCGTAGGGTCGAGACCATGCGCATCGCAGTACGT  
GTAGAAACCTCTCAATGTCTGATAGTTGCTAACGAATGTGCGATAAGAAGAGCTTTC  
GTCGTAAGTGTGCTTCAGCGCAGTCTCTGAGCGATAAAACCAAGGGCAAGCGCGCTG  
CTCGGAAGCTTCGAACCTTGTATAGGGTTATTCAACATCTTATCGGCGGTTTGCTTGCG  
CACGCTGCTCATGCCGTGGCACGTAAAAACCCGGTAGTCCCAAGCGATGCTGCCGCT  
GCGATTGGTCTTGACCGACAGCTCAGGAAGCTCAGAGAAGGCTGTCACTCGCATGG  
TTTCTCGATCGCTTCGTTCAAGAAGGCTAGTGAGAAATCATTTCGATCTTGGCCTTC  
ACCTTCTCATCTTCGACGAACCGTATGTAGCGTAACGAGGTGCGCTCGTGAGCGTGT  
AAGAGTAGGTCTTTGACAATGGAGATCGCATTGAGACGCTGATTTCGAGCGTAGAGC  
AGTCTCAGCGACTTCGGTGGCGAAGGTGCGCGGTGTCTGGTGGAAATGGAATCCAC  
CAAGGTCGATGCTAGTCTTCGCAGCTTCGCGTCGCAACCTCGACATGAGAACGCTAA

CAGTAGCGCCATGCCCTGGCGACTTGGCAGCATAGGACCGGCCAGCAGTAGTCAGG  
AACACCCGGTCTCGATCGCTGCGCGCGGCGCGATCAACACGTCTAATGCGCGTCGG  
CGATTTCGACGTATCCAGTATTTTCATCGAAAAGCGTCGCCGGCATGATGACTTGACC  
CGTGACGTCGAACTTCGTGTGGACTTGGGGTGTGCGCGCCGGGCCCCGATAGTTAGGTA  
GACAAATCCGTTCAACCTTGAGTCGCGCGCAGCGTTGGTGAGCGTACCTACGCGAA  
GATCGCAGATGGATCCGACCCGCATACCTGTGAAGAAGCCGCAGGCGAGCATCAAG  
AAGAGTTCATAGGGGCGCGTGAGATCGAGCTGCCTCTAGTATTTGAGTGCGTTGTTTG  
GCGCTCACTGGAAGAACCCCGCCTTCAAGGCCGTATCCTGGTCGACGCTTGTTCTTG  
ATCGCAAGCGAACTCGTGGTCACATTGATCGAGCGCTGGAGCCCGAAGTCAGTGGA  
GATCCTCACACCGTATGTGCGGTCTTCCCAAAGCGGCCACTTAGTGATATGAGCTG  
CTCTTCTACAAGCCATCTATAGAGCGTAATTACCGCCCTCATCCGATGGGTACAGT  
GCTGGCCGCCAGCTTACCTGTGGCTCTCAGCTGTAGCAGGTGCTGCCGGTACCGATT  
GAGCACGCGTTCGTTCTTGCGCAGCGGGAAGTGGTGCCATGGAACCTTCACCTCCTC  
AACCATTGAGCGTAAGCCCCTACGAGTTGTGCATCCTTCCTTACTGTTTCTGCATCA  
AGGCCAGAGTTTTTACGAGAGAGGAGCCAAACATTAGCCTCTCGCCAAGGTTCTCCG  
TGGCCCCAGACGAGTTGTGGCAAGGCTTCCGCAGCCGGCTGATTAGCCCGCGAAGG  
ACTTCCGGTGACCGGGTTCTCACTACAGTCAAGTGATATCACTACAACCTGTGCCAA  
GTTGGCTCCGCATGAGACCCGGACGAGATGTCCGTCCTTATCGAATGTAATGGATTG  
CGTCCATCCAATAAAGTTGCAGGTACCCATCGTTGTTGCTCAGCACGACCAACGGCC  
TGCCACGCAGCTCGGGCTGGAACACCCGCTCGCAGCTGGCGTAGAAGTTGTTGCCGT  
CAATCAACGCGAACATCAGCGGCCAGCGCGGGAATGA

>CONTIG\_13\_length\_15133\_cov\_5.337465

GGAAATGGTGGCCGAGGACGGAATCGAACCGCCGACACGGGGATTTTCAATCCGGA  
GCCGCAAACCTAAGTAGCTGATTCTAAGGCCTTCCTCCAAGTCATTTGGAGCAAGCG  
CGAATGAAACAGAAGGCTCTGCCGTGGCATGCCCAGCGCGCACTGGTGCAAAATTG  
GCTCAAGTTTTTGGCGCTGGCTTGGGCTGCTTGGATCACCTCAGCAGGCGCCGCCA  
ACGAATGACGCACCTCTCCACCGAGCTCTCCCAACCAGGGGAGACGATGGATGACT  
TCATCCTCCGCATAGCGCCAAAGGTAAACAAATTACGGCGGATCTGCGCGCGGAA  
GTGTGCGGAACAATTCGCACTGAGCAGGGCCAGCATGCGGTGGATATCCGCACTTA  
CCATGACCGGTACAGCTGTTTCGTTGAGCGCGATGGGCTGCCGTACGTGCACACACA  
CCCGAGCTTACGAAAGACTGCTGGACGTTACGCCTAGAGGACTGGAAGCGCCCAG  
GCTACCTGGTGACTGAAATTGGCGTCCGTTATCAGGACACGAAGCGCTCAAGGAAA  
GTGAAACCCTCGCGCCAAAACACAGCTGCGCGAAGGCCCTATCGACAGTCAGGGG  
CCGACGCCGCTCTTGGTGAACATGGCCAGGCCGTTAAGGCTCGGCGGAATCAGAA  
GCCCCGGCGATCAAGTAGTTTCGCGTATTTCCAAAAGGAGTTCGCGGTTAGTGCAATGG  
CGGTTGAAAGCATCCCAAAGCTCCGCCCGTCTTTGCTGCGTAAGCTTCTGATCTATA  
AGGCCTTCAGCCTCCAGTAACGATTCAACTCGGTATGTATGCACTTGGTTCATTTCGTC  
TAGGCCGTCAATTACATCGCCATTCAATCATGTATGCGATGCAAGCGGTCCGAGG  
ACACGCGCGAGCTGGATTGTCCGACTGAACCCGCAGCCACTGGCACACGCGAAACA  
CCGCAATGACCGATCCAGAGTTGTTAATTTCTGTTCTGACGATTTGACAAAAACGTC

AAATTGACAGAATCTACGCATCATGGAACCACGCACCCCCGGACAACCTTGTCACCA  
CCCTCTTAAAAAACAAGGGGTGGACGAAGAGGACCCTTGCGATCGTGCTGGCGGTT  
GACGAGTCAGTTATCACGCGAATCGCTTCCGATAAAAGACCAATCACCGCTGATCTG  
GCACTTGCTCTCGAAGAGCTCTTTCAGGTCCCCGCAGAGCGCTTCCTGTCCTTGCAA  
AAGGACTACGACCTGGCGCTGGCACGGATTGCCTTCCAGCCAAGCTCAGCACGTGC  
GATGCGGGCCGAGATATTCGGATCACTGCCGATCGCTGAAATGATTAAGCGCGGTT  
GGCTCAGTGTTGACAATCAACGCGACGTGGCTGCAGTCGAAGCTGAGGTCGCCCCG  
TTCTTTGATGTGAAATCTGTCTCCGACATCGCTTTCATGTCCCATGCCGCTAAGCGCA  
CCCAGGTTGGGATAAATGCGACCCCCCTCACAGCTCGCCTGGATCCACCGGGTGAGA  
TCGATTGCTTCGGAAATGCTTGTTCTAAGTATTCGGCGGCGTCGGGAAAACCTGGCT  
ATCGAGCGGCTTAAACCGCTGCTCCGTTCTGCTGAAGAGGGGAGAAAGGTCCCTCG  
CATTTTGGCGGAGGCCGGTATCCGTTTCGTTGTAGTGGAGACCCTGCCTTCGGCCAA  
GATCGATGGGGTGTGCACGTGGTTGGCAGATGATGCACCGGTGGTGGGAATGTCCA  
TGCGTTTCGATCGAATTGACAACCTTCTGGTTTGTACTGCGACATGAGTTGGAGCATG  
TTCTTCGAGGCGACGGAAGCATAGTCCGGTACTTGATGTGAGATGGATGGACGA  
ACCGACGCCTCCGTGGCTGACGAAGAGCGAGCAGCAAATTTGGCAGCTGCCTCTTTT  
GCAGTTCCGCCGGATAAGTTGGCCGGATTTATCGCGCGCAAGTCACCACTATTCTCC  
GAGCGAGACATCGTTGGTTTCGCAGCCCTCATGGGTGTACACCCGGGCCTTGTTGCC  
GGACAGCTGCAGCATGCCACCGGCAAGTACGACCGGTTCCGTAGTCATCTAGAGAA  
GATTCGCTCGATCGTCCTCCCAGGCGCATCGACCGACGGATGGGGCGACGTTGCGCC  
TCTGGGTCAATAGGAGATAGATGCATGTCTACCAAGCGTCAGCGCCTGCAGAACATT  
ATCAAGCTCTACAAGCAGAGGACGGGGAACTCGTCTGTGTCGTCATGCAAGACGTCGC  
AAAGTTCGCCGCCGAAATGGGATGGCAACTCCCGAAGCCGAGGGACCCTATTGATG  
TTTTGGCTGAAGAGCTCTCGAAGGCTGCACGGGAGGAGGTAAGAAAAGATGAAGTA  
ACAGGCCGTCCCTACCGGGCAAATCTCGCGGTGACGACTGCCAAGCCTGATGGAAC  
GCAGTTCACCTTTTGGACGGATATTGACGAGGCTCCCCGGCACGTGGCGCATCGATC  
CTTCACACAGCGACGGGACCAGATGATCGGCGATGCCCTTCAGCTTACATTTGATGC  
GACCCATTGGAACAGGGTGCATTCGGAAGAAGATCCGATTGTTATGGTGCTCGACTT  
CTCCGACGACGTGCGAGAGCGACTGACCGCCATGGACGTTGAGGACAAGGCTGCAT  
AAACCGTCTGTTGGGTGCCGGCTGGGCGCTGCTCAGGCGCCTCGCGGGTAGTGCGG  
CCATCTTGGCACTGCCTGTCAGTTGCCGGGTGCACTTCACCGGCTATGTCTAGCGAG  
ATGCACTAACGCGAGTCGATTAGCCCTTGGGCGAAGCTCAGCCTGCTGGCTGCGGA  
CACCAAGTCAGGAATCTCTTGCCGTATTGCAGCCACCTGACCTTTCACCGCAAGAAG  
CCTGAGGACATCGCGATCAAACCTGGGGTCGCTCACGCCAGAGGCTGCCTTGCTGTC  
CTGGGCAACGAACTGGAAGCAGGCCTGCCAGCGCGGACTTGGCGCGGCGGATAAAT  
TCACCTCGACTGCTTCTAAGCTGGCGTCCACTGACGGGTGCGCCGCGGACGATGTTGA  
CACTGCGTGCTGTGATCTGGATCCCCTGTTTCATGGCGGGGATCATCAACAGGCGCG  
TGTCGAAGGCCGGTGATCGGCTCGTTCAACCAGCACTGAAGAGATGTAGCCGGCTC  
GGCGCTGCTCAAGCGCAAGCGGGTGAGCGGCCTGTGGCCCCGCTTCCGGCAAATGT  
AGATTCGCACCGATATGGGATTTACATATCGGTGTGTGCCCTACCGCAACGTCGGG

ATTTCCCTACGTGTGCGTTCAACGCCCAAGTGAACGTTTTTCGTCTGTGGCAGCGATGC  
AGTTTGGTCAGGCTGCCGCCGGCTCGGCAGTGGCCAGGCTAGCGACGATGGCACCG  
TCCGTTGCCGCCTCAATCAGGGCCTTGAGCTTCCAGCCCTCCAGCTCCTGCGTCGCTT  
CCGCGCCGGGATAGCGGATGGCATAGGTCGGCGCAATCAAGTCGGCGATGGGCGCC  
GCCAGTACGCCGAGGGCGGCGCCACGGTCCTCGACCTGGAACGTGACGGTGCCGGT  
GTCGTTGATTGGGTTCCAGATGATCGTGATCTGTGCGCAAGCGGATCTGCATCCGG  
CTCCGGCGTCATCACGTTGGCATCATAGGCGGCGCGCGTCGCTGCCTTGATGCCCAG  
CAGCAAGTGCACGCCGGGCTCGGTGACCGTCTCGCCCGGCACCTCCACGGCCCTGCC  
AGTCACCAGGTCGACCTCAGTCGTGGCCGGCGCGGTGATGTCGTAGCTGCGGCCGA  
TCAAGTCGCTGATCTGCACCGTGAGCACGCGCAGGAAGGACCGCTCCAGCGTCTGC  
GTCCAGCCATCCGGATGTGGTTTGGTGGAGATCTGCTCGAGGTGGAACCTCGACCGGC  
CCATCGTTGGTGGCCGGGTCCCAGCGGATCTCGATGCGGGGCGACACGATTTTTGTCT  
TGCGTGCCGAAGGTTGGGTTTTCGCTGATGAGCATGGTCAGTATCCAGTAACGTCGA  
GGATGGGAGCGCGCACCCACGCCTGGCCGTAGTTGCCAGGGGGCGGCTGGGGATTG  
CCAAAGGTTCCGGTGTTCAAGTTCCTGGGCGGTATCAATGGCGGCGATCGAGGCGAC  
GTTGCCGTTGATGTTGACCACGCCCTTGCGCCACAGCACCTGCACCTGCCACTGCGG  
GCCACCGCCAATGAGTCCGCCGATGGCCAGCATGATGTTGCCCGTGGAGCCGGCCA  
GCGCGGCGTAGGTTCCGGCCTGCCGGCAAGGTGAGCGAGCCACCCTGATTGGCATTG  
CCCTGCAGGAGCGCCCGCACCTTCATGTACTTAAGCGTGGCGTCGAAGTGCACCTGG  
TTGGTATCCGGATTGGTGATCACCAGATAGTCGCGGCGGCCGAAGTTCGGCTCGTCG  
AAGACGTACGCGCAAAGCTGCCGCTGGTGCTGAAGCCGGTGAACGTGAAACTGCT  
TCCGCTCTGGGTGCGCGTGGCGAGCACGGCGTTGCTCTACCCAGGAACGCGAGGG  
CCGGATTGGTGCCGGTGACGGTCAGGCTCCAGGTTTTGAGCACGCCACTGCCGGTGG  
GTGTGATCGTCTGCTTCGACGCCAGCGCCAGATTCTTCCAGGTCTCAGAGATAACAA  
CACGATTGGGGCCAGCCTCGAAGATTGCGTAGGCCATCAAAACCTCCCGTAGAACA  
GCGTGCCACCAGCGCGGGCCGTCAACGAAGCCGTAGGCGATACCCAACCTGATGGTG  
TTGCCGTCGTCCTGAAGTACGGAAGCAAGCTATTGCCTGCACCGCTGTGCGCGACG  
AACCAGTAGTAGAGCTGGTTCGCGCTGCCCGTCACCGGCACCGGCACCGAACCAATT  
GCTGCCGCTGGCGATTGCGATCGCACCCATGTGCTGCGTGAGCAGATCCGAGTCGG  
GCTGATCGGTGATTTGCAGCAGAGCGACGCCAGTGTCGGCGTCGTTGATGATCAGG  
ACGTTGGTCATGTCACTCCATAACCCGAGGGCAACGACACGGCGGCCGTTGGGCGCG  
TAGGCGTAAAACTTCCCGCCGACGAACTCGTTACGGCCACCGCCCGGTGTGGCACC  
GATGATCTCCACCACGTCCGCAGAGAACGTGATCTTGCCGATGAGCCCATTATTGAA  
AGAGCGCATGCCGATCACCTTGCCAGTGACGTCCAGCGCCCATGTGTAAGACGCGT  
AATAGCTCGCAACCCCGTTTTTCATTGACAGACATCCGCGCTTCGAGCGATTGCGTCG  
CCGAAGCCTGGTCGACCACCGACGTGTCATCGGTCCACATCGTCGCAACCAGCCCCG  
GCTCCAGCTTGGCGCGCCGGAAATAGGTACTGCCAGGGCTGTTCTCTGCGATGAAGC  
GGCAGACAAGTCGAGTGGTACCAGCCGGTGCGTTGATGCTGATCTGAAACCTCTTCC  
ACGCCGCCAGCTGCCCGAGTCCGCCGAGACAGTGACGGGGGACCCGATCAACCCT  
GACGCGCTATGCGCGGAAACCTCGATCCGGCCGACACCAGAGCCGCTGTCTTTCCA

GATGTCGGAGGACAGCGTGTAGATTCCCGCAGATGCGTTTACCGACTGCTCGGCAGC  
GGCACCGCCGCTCGATGCGGCCAAGCCGAAATACGGACCGAAATCCGGCCGATTGA  
AGAGCGCTGCCCCCGGTGGGAGGGTCCACGCCTGGCCGCCCTTGCCCATGTCGGGT  
TTCGCAGCATGTTTCGCGTTGATGTTGGTCTTCGCGACGACGGCAGTCAGTGCAGTGC  
TGGTGGCGTTGGCCTGGTTGCCTACTTGCTGCACTTGCGAGCTCAGTGCATTGAGTG  
CCGAGGTGTCGGCTTTGCCCGCCACTGTTGCGTTTGTTCCTCGATGCGTTGCCCTAG  
CGCCTGGTCACCAATGACGCGCGCCTGATCCACGGCAGTCACACCGGCGGAGGTGCG  
CAAGAAGGCCGATGCCGGAAGGCATGCGCGCCTCCACAACGCCGACCCTCTGCCCC  
ATCACCTCATTGCGCCAGACCGCCGCCTCATCCACGGCAGTGACCCTTGCCGCAGTC  
TCCAGACCGCCGGTACCGGAGGGCATGCGGGCCTCCACGGTACCGACGCGCCGTCC  
CAAGGCGCTGTCCGCGTTGGCACGTGCGGTTCGCTCATCGCCAACGGCCGCAGAGG  
TGGCCAGCTGTCCGTCGCCGGAAGGCAGCCGCGCAATGACCCAGAGAGCCGAGTA  
ACCTCGGCTGCGAGTTCGTTTCGCAGTCTGGTTGGCGACGTCCAGAGCAGCTGCGATC  
GCCTCGCCTGCGCTTGAATAGTTGCCGACGTTCTGCCAGGTCGAGGGATTGCCCGCC  
GGCACGACGCCGGAGTTCTCAAGCTCTGCCCGGTACAGACGTCCGTCGTAGCGCAC  
AAAGTCGCCCTTGGGATACGAAGCAGTCGAGGTCCATTTCGTCGGCGTTGACCAGATC  
GCCTAGCGCGGCATTGAGAGCGTCAGCGTGTGCGATCGCGTCTTCGCGTGCCTTGTT  
CGCTGCGGCCAATGCTTCCTCGGCGATCTGCCTGTGCGCGCAGCCGCTTCCAGGAA  
GCCCTGGCGGATCTCCTCGGTGGTCTGGTCGATCGCCTGCTGCATCTCTTCCTGCAGC  
TCGCCCAGGTTCTTGCCCAGCGTCTTGGTGACGTACTTAGCCGCCACCGACAGCGTG  
CCGTTGGTGTGTCGCGCGCGGATGGCGAACGTCCACTTGCCCGACGACGGGATGGG  
TGAGTCGAACGCACCGGTGTGGTAGCCGCTGTGCGCCGACCGGGCGTCATGGCGTCCC  
ACGCCGGCATCGGCGCGCCCTGCTCCGGCGCCTCGCTGTAGCGGATCTCCGCGCCGG  
CCAGATTGGCCGACTGGATGGTATCGGTCCAGAAGCCCCAGGTGTAACGCCGGATG  
CCGCCAGAGACTTCCTCCACGTGCAAGATGTCGTAGTTACCGGAGGCGCGTCCGCG  
CCGATGGTCGTGAAGATCAGCGAGGCGCCACGCCCATTTGCCCCCTCCGGGCCGAA  
CGGGCGCACGTTGATGGTGTACGTGCCGGCGCGCGGGATGCGCCACCGCGCGGTGC  
GGGTGCGCGTCTGCGCCACTTCCACCAGCTCGCCGTTGCCATCCGACGCCGAGGCGT  
AGACCACGGCGTGATCGAACGGGCCGCTAATGTGCAAGGTGGCCACCAGGTTCGGTC  
GCGGTGACGTACCGGTGGTGATCTGGTCCTCGCTGATTGCCAGGTTGCTGAGGATC  
GGGCGCGTGGCCAGCGACGAGCCGTTTTCCGGCTGGATATACTGCCCGGTCTTGACG  
TAAATCCAAAACCTCCGGCGACTCTGGCACCACGCTGATGCTGGCGCCCTTCAAGTCG  
CTTTCGGGCTCGATGCTGACAACGCGAACGCTGTAGCCCGGCGTAGCCTTGAAGTCG  
TAGATCCAGATGGTGTGCTGCGCCGGGTGTCTGCTGCCAGCCACCGTCCACCATGGCG  
TCGGCGTAGCCCTCGCCAGGCAACGCAGCATCGTCAGGCCACTCCTCCACCAGTTGG  
ATGGTGTGCGTTCGCTCTGCGAAGGGGCGGACGCGGAACGTGCGGTAGACGGCTTC  
GCCGGGGATGCGCAACCCAATGAACGCGCTTCCGGCAGCCGGCGGCGGCACCGGCT  
CGTCCAGCGTCAAGGTGACCGTGCCCAGCAGCGGGCTGCGCTCGGCCGAGACGATG  
CGCCCGCCGAAACCCCACTGCGTCAGGTCATGCGAGATGGCCAGCCTGCCAGCCG  
GCGGTAGCTCAGATACTCCAGGTCCTGGGCGAAGCTGATGTCCTTGTACTGGTACAA

GCTCTGCGCCAGGTGGTACCGCGCCAGCTCCGCCCCATGCACCTCGCGACTGACGCC  
CTCGCCAGTGAGCCGCGCCGGATTGAGCATCGTCTGGACGCCTGGTGCGGGCACGC  
GGAGGGTTTCCACCTTGAGCGTGGTGCTGTCGAAATATGAGTATTCGATACCGTCGG  
CAGCGCTGGCCAGCGTGTAAGTCGACCGCGAAGCTGCCTTTCTTCATCGTGCCCATGT  
TCACGATGCCGGACAGCGGCTGCTCATCCGCGCCCAAACCACCGATAGGCGTCCG  
CCGGCCCAACTCACCTGCCCCATGCCCGCCAGTGCGATCGCCTGCAGCACCTCGTCG  
TGCGTGCGCTCCTCGATCAGCCAGTAGTCGTAGGTGTAGCCATTGGCTTCGCAGTGG  
GCCATGAAGCCCTGCAACGACTCGATGTCGATCTCTTCGTGCGCTCTTGCCCATGCCT  
GCGATCAACAGGCCGTTCTCATCGAAGTAGCCGCGCGCGTACTTGAGGATGTGCGC  
GCCGTTGTTGCTCGTTTCCTCGGTACCCATGCGCCGTTGCGCCACACAGGAATCGG  
TGAAGCGATGTGCTCGCCGCGGATCTCGTCCGGCTGACCGTTGAGCTGACCGGTGGC  
CTTCATGGTGATGCCGGTGCGCGCGATGCCGGCGTAAGTCGCCGTGTCGGCCTGCAC  
GCTGCTCAGCGTTGACCACTGGAAATCGTTGCGCTGCTGGTTGTCTCCCTCGTAGTTG  
CCCTGGCCCAGGATGCGCACGCGCACGTCGTAAGTGGCCCTTGGCCACGTCCGCCGAC  
AGCGTGCGCGCTTGCTCACGCCGAGCTTGTCGCCGACGAAGGTGCGGGTGCCTCAA  
GGTGGAACAGATTCCGGTGCCACCGGCGCGGATTGCACCTGCACGGTCTCGGAGA  
CGTTGTAGGCCTTGCCCGAAGTGCCGACGCCGCCAACACGTATTCCAGATTGATCT  
GGATGCGCACGGTGTCGGCGCTGGTGGTGCGTGTGACGAAGTCAGCCGTGTCCGGC  
AGCTCGCCGCCGTCAATGGTGTCCACGTTGCTATAGAGCGGGATGGTCTGCTCCGGC  
ATCTGGCTGTAGCCGGAGTGGAAGACGCTGACGCCCTCATAGCTCGACAGCGGCGT  
ATTGCCGTTGGACAGCGCACCAACGCGCCCCACGCCGATGCCTGGGGTGAGACCA  
TGCCGATGTACTGATCGTCGCCCTCGTACCATGAGTAGGCGTTGCTGGCGACATCTG  
GTGCCAAGAGCGGGACACGACCGAATAGCAGCCCCAGCGGCCCGTACTGACGCGGG  
CGATTGCGGGCAGCCCCGAGGCTGTAGACCGTGCCGGCCGTGCTGGGCGCCGGGCT  
TTCCACCTTCGGGGCCGAGCACCTTGTTGATCAGGATGGAGCCGGCTACGAACGCCCG  
GCTGTAGGCCACCGCTGCGCCGGTCGCCCCAAGGCCCGCAGCCACGTTGCACCCG  
CGCCGCCAGTGAAATAGATCAGCGCTGCCATGGCCACGATATACAGCGCGTTCTCA  
CCGACCGCGCCGCGCACCTCGATGACCTGCCGATCCTTCGGGAAAACATGCGGCCA  
CAGATGACGCGGCACCACGCGGCCGCCAATCGACACCGTCCAATCACCTGGTCCA  
GATCCAGCACGTGGCGATACAGGAAGTCGCACAGGCGTTCGCCCCGCTGCAGATCC  
ATCGGGATGTGGCGCTGGCCTTCCAGCGTCACGGGGTGCGGCGTCAGCACCAAGCTG  
ACCTTCAATTGCCGGTGCGGTCATCAGACCCATGCGTAATAACCCTCGATCCTTGCG  
CCGTAGTCCGGCAACTCGCGCACGCGGTGCAGCCAAGTCTGCCGAGCGCGCTGGT  
GGTGTGGAGACCCAACCCTCGTGGGCCAGATGGAAGAACACGCCGACGTGCCCGG  
GCCGGCTCTGGCCCTTGTCGAACATCAGCACCAAGTCGCCATTGACGGGCGTGTTGG  
TGGGAACCGCGTAGGCCGTCGACAACTACCAATGGCGGCCCTGGCCAGCGGCCCCG  
CGCGGGCGGGCGCGCGGGCATCTGCACATCGCGGCCGAACAGCTCACGCTGAACCTG  
GGCCACAAGGTCGGCGCAGTCGTAGGTGTGCGGTGTGCTAGGGAATGCCGACGAAGC  
GGTCAACGTCAGACGCGCGCATCAGAAGATCCCCGGAAGCGTGTGCGGGTTGGCAC  
GCAGCTTCACGGCTTGCTGCCGCATGAAGAAGTCCACGCCGATCTGCGCGGTGATCA

GCGGGCCGGCGGCACGCACCTGCGTCAGAGGCAGATAGAAGCGACGCGCAATGAC  
GTTGGGCGCGGTGCGATCCGTGATCAGGTAGCGGCACATCACCAGCTCGTTCGGCTG  
GACGCGCTCCAGATCCTCGGTGACACCCCGACCTACGTTGTCCACCTCCAGCTGCGC  
GCGTGGCGTCTGGCCGGCCTGGTCAGCTGGTGGTGTGAATCGAAACGGGGCAGCGCT  
TGTAAGAGATTGCCGTTGCTGGTCCAGTCCTGCGTGTGCGTTGACGATGCGAAGGACCG  
CGGCGAACGATGGCGCGGTTCATCTCCAACAGCTCCAGCGGGCCGTCGGTGTGCGTC  
ACGCGCTGGCGGGCGCTCCTGGAACGTGCTCATCGGAGGTACTCGATCTGCACGTGCG  
ACTGGTAAGGGCGATCCACGCCTTCCACGGCGCGCAGCTCCCCAATGTGCGCCGCCG  
ATGAATTGCGCGGTGATCTGCCGCCCGGTTCTGTGGGTGCGCCATGGTGAACGTGCCA  
ACGACCTTGATCACATCGAAGTACCAGTCCAGGAACGCCGCGGGCGTCATCCTTGTTG  
GAAAAATCGAAGGAGAGCGGCAGATTGACCACCGTCCGCGAGTTGATCCGTTCTTG  
CTTGGCGAGGCCACGCTCCATTTCCGTGCGCTTGACCGAGGGCACTGGCCGCTCGCG  
GATGGCGTCATAGAGCACGCCGACATAGGCGGGAAGGCTTGCCATCAGCGTCCCTC  
CTTCAGGGCGAAGCGGTTTTTCATGGCGCCAGCCATCCGACCACCGCCAGCGATATC  
TGCTGCACCAACGTCCACGATGAGTTTGCGCAGCTCGCTGCCGTCGGGGCCGCGAGT  
GCGCTCCTCGCGCTGTTGCGCTGGCTGGCCGGAATAGTTGTTGATCTCCACGCTCAT  
GCCGCCGGGACCGGCAACGGAGGGCATTGCAGTGCTACCAACCAGCCCCGCCGGCGG  
CATACCCGCGCCCCGCTACGGATCGTGCTGAGCAGGGAAAGAAATGCGCCAGGCCCG  
CCAATCGATGCGATATCGCGCTGGCTCAGCACACCCTCGCCCTTGTCACGACGCCG  
GCAGGCTCAAACCTTGCCGCCCGGCCCGGTGTAGCCGCCGGTGTCCAGCCCTGCAGC  
GGAATCGCCTCGCGCTGCACGTTACCGGCTCCAGCCCCACCGCCGAACACACCGCCC  
TGCAGGCTAGTGATCCCTTTCCGCACCGTGATGCGCGCGAAGTCGGCAATGATCGAA  
TTGGCCATGTCCGTGAAGCTGAGCTTCCCCTTCGTGCGTGGCCTTGACCACCATGCCCT  
CGAACGAGGTCAGCGCCGCAGTGGTGGCGTTCTCCACCGCGCCAGCCGCGTTGCTG  
GCTTCGTGCGGATAATTGGCCCATGCCGCCGACGCGCCCCCTGCCCCAGTCGGCCTGT  
GCTTCGGACATGCGCACGTAGCCGTCGCGGATCACCTGCACGCGGGCGCTCGGTGGC  
AGCGCGCACTGCCTGCTCCTCGGCAGCGGCGGTCTGCTCGTCGATGGTTCCAACGCG  
CTTGAGCAAGGCCAGTTCGGTCAGCCGCTGCGCCTGCTCGCGGTACACCTCGTTGAG  
GCGCTGCTGGATTTTGAACCTCGCGATCGCCCCGAGCCACGCGCGCAACCATCGCGCC  
CATCTCTTCCTGCAGCGCGTTTGTGCTGGCATCGAGTGCGGTCTTGTAGGACGTCAG  
CGCGTCTTCGCGCTGCTTGGTCAGCTTGCGCTCGTCAGCGGCCAGCACATCCAGCTT  
GGCGGCGCCCTCGGCGCGCACCTTGGCCAACTGCGCCTCCATCTGGCCAACTTGCTT  
GCCAATGTCGATCGCATCCTTGCCGGTGACGTTGCGGCCTTTGAGGTAGTCGATCTG  
CTTCTGCAGCGACTGCGCCTCGGTGCGCCGTGCCGCGCTCGGTCAACTCGCGCATGCG  
CTGGTAGTACGTCTCGGCAGACAGCTCGCGCGCCTGGTATTGCGCCTGCAGCACCTT  
GGTGCTGGTGGCGATCTGCGCCTGCTCGGTAGCCAACGTATCCTTGATGGACTGCAG  
GCCCGCCGAGCGGCCCGAGGCGGCGATGCCCGCCGCGCCTTTGACGCCGGCCGCTG  
CGGCCGTGTCGCGCATGGCTTGCTCGCGCTGCTGCAGGATCTTGGCGTCGGTGATGC  
CGGCCTGCGCCGCCAGCTGGCGCATCTTTTGATGCGCTCTTCCAACCTGCGCCTGCTT  
GGTCAGGTACTGCACGCCCTGCTCTTGGAATTTGGTGCGCGCCTGCTCTTGCTTGCTG

TCCACCTCGGAATAAATGCCGGCCATGATCACCTTGACCGGCTTCTTGTTGCTTCCT  
TTTGCAGGTCCGCGATCTGCTGCTGGAACCTGGCGACCAGCTTGTCGCGCTCCGCAG  
GATCCAGTTCCTTGTAACACACGCTGCCGCTGGTGAGTCCTTCGATGTTGGATTGCA  
GCTGCTTGATCTTGCTGGTTGGCGTCTCCTGCCGGCCGACACCGAGCATGGTGTCCC  
ACGCCTCGGCAGCCACACCCTTCACCGCGCGCCACGCGCGCTCCATGTAACCGAGGT  
TCTCCTGCACATCGGCCGCCCCGATCCTTGAGCGTGTCGGCGTAGAGCTGGAACGCCG  
AGGCGACCGCCTGGACCTGGTTGCCCTGCTCGATCAGCGTCTTGATGTTGGCCAGCT  
GCGTCTGGTCCAGGAAGTGCATCGTCTCGTTGAGCTCGAGCAAGGCCGCAACCGGG  
TCCGCCTTGATCTTGCGCAACTCGGCGATGGTCTCTTGACCGCCTTGCCGGTACCG  
GCACGCATCGTCTCGGCGGCGATCGCCACCGTCTCCAGCTGCTCGGCAGTGAACCTG  
CCGGTGGCCGCCACTTGCGTGAGCGCAGCGGCGGCGCTGGAAGTCGTGACGCCGGA  
GATGCCGTCCATCTGCGCGGCCACTTCGGCCAGTCGCTCGGCGGTGCGACCAGAGCT  
GTCGCCCCGCCAGGATCATGGCCTGGCGAAAGGCCGTGCCCTCATCGTTGCCCTGCTT  
CCACGCCAATGCGACCGCAGCGACCGCAACGGCTGTGATCGACAGCGGGTTGACCA  
TGCCCAGCAGCGCCGTAGACACGCCCCGTCAGCGCCGGACCAATGCCGCCGAAGCTG  
TCTTTGATCTGCCACCCTGCTGCACCAGCACCGTGAACCACGGCATGCCGCCCTGG  
ATGCTGGTGACGATGTCGGTGAACCTGCATCGGCAGCTGCGCCATCGCCTGGCGCGTC  
TGGCCGGAGGTGACGCGCAGCTGGTTGATCACGTTGGTGGCTGGCAGCGGCTCGCT  
GGCCTGCTTGCGCACGTCGGCCAGCTGGCCGCGCAACACCGCCATGCCTTGCTTGAT  
GTCGTTGAGGTCCGCACTGATGCGGACGCGCAGGTTTGCAGAAGGTTCCGGCCATCTA  
CCGGGTCAGGTCGTTGAGGTACTTGGTAAAGGCGGCAGGCTCCAGGCCCATCGCCA  
TGCGCACGGCGTAGGCCGTGGCGGCTTCGTGCTGCTGCAGCTGCGCGCGGTTCATCGC  
GCACGGCGGCTGCAGCGAACGCCCTGGCTTGCGCCAGGGTGTAAGTCAGGACGTCT  
CGTCGCTGGTGGCCGCGAGCGATGAGGAACTGGACGAGGTCGGCCCATCCGGCGGT  
GCCTGCATCGCCACCATCGCGGGGATGGCCTTGCTGCGCCTGCATCAGGCTTGGC  
AGGCGCTGGCCGAAAAAATCTTCATTGAGCTCCACCACCGCCTCTACCAGGGCAGC  
GGCATCTGCCAGTGAGGCACCAGCAACCCATGCCTCTGGCTTTCCGGCCACGATGGC  
GCCGCCCTTTGCGAAGGCATCGGCGTCCTGCTCCAGCACGTCCATCAGCAACGCCGC  
CACTTCGATCGTGGCACCGCCATTAACCAAGCTGGCGGCAATCAGCACACGTCCGAT  
AATTGGCCGGGTGGCTTTGATGAAGGGGCCGATCTGGGCCAGCGTCAGCGGTGTCA  
GCTCCAAGTCTCGCCGCGAAAGGTGATGGCCCCGTGTGGGCGGGCTCAGTACGTCG  
AGGTCCTCCATCACTTCTCCGCATCCCAGGTGAAGTACTGCGACACACCGGCCGGCT  
TGCTGGTGTCTTGCTGAGCGTGCCGGTGACCGTGCCGGCCCCGTACTGCTCGCCGA  
TCAACGCCAGTTCGCCAATCACGCCGCCCGAGACGCGGTACGCATGTGCGCGCACCC  
TTCTTGCCGCTGCGCGCTTCGTTGAAGCCAAGGAACAGCAGCTCGTATTCTTCGTTT  
GGGTTACACAGCGCCTGCAGACGCTCGGCAGCGCCGAAGCTGTAGGTCACCTTGAT  
GTTGGCTGCGTCATCTTCGGGGTTTTTCGATGGACGATTCTGCCGGCACGTACAGCGC  
GCCGTTCTTGATGTCCCAGTCCTTGCCCTTGGTGTACACCGCAGCGCCAGTGACCGG  
CTTACCGCAGTGATCTCGGCGGCCAAGTTGTCCAGCGGCGTGACGCCGTCTTTGTA  
GGCAACCACAGCTCATCGACCGCATTGCCAGCAACGATGGCCGTGGCGGTACCGC

GCAGCACGTCGGCGAAGTTGTCCGCGCTGAAGTCGTGCATGGTGAAGCTCACCTGC  
ACCTCGGTGACGCGGTCCACCGAATTGCGATTGCCACCACCAGGCTGGGTGTTGTCC  
AGCAGATTGATGCGGTTGGTCTGCGGCGCAAAGCTGAAGGCCGAGCAGTTGCCAAC  
GCCGCGGAACGGCTTGGCCGCGCCGCGCTTGC GCAGATGCAGCTCGCCGCTACCCA  
GGTAGCTGTAATCGGGGGAATTGATGGGCATGGATGCTCCTTGTGGGTGCCGCGGG  
CGGCGTCAGGTAATGGGGATATGCGATTGGTAGGTGAGCAGTGCCCCGACCCAGCT  
CATGCCCCGCTTCGGGCTTGACCGGCTCCATGGACACGTACTGCGGGCACTGCATGCC  
CGGCGGGTAGCGAAACTGCTGGTTCGGCCATGGCCAGCTCGATGTCGGACACCAGCG  
CATCCAGCTGCGCCTGCGCGGTATCCAGCGGCGCCGGTACCTTGGCAACGATCACCA  
CCGTGGTCAGACGGTGCGTGCGTACC

>CONTIG\_14\_length\_13983\_cov\_182.809252

TTCGCCTCGGTGCTTAGCGAAGGCCTGAATTCTAGCCTTGTTTTTCGCCCTATGCAAC  
AAAATTCGTCCAAGGACTTCCATCAAGGTTCAAGGACTGCCATCCGCGTCGTGCGAA  
CGGACGCAGAGCCCTACCGAAAAACGCACCACAGATACGCGACACTACCCGCCTCA  
TGTTGAGCAGTGATCCATGCAACTGAACGTTTCGGCGACCCTGAAGGCCTGGGCAAG  
CGCAAGCAGACCCGGCGCGAGATCTTTTTGGCAGAGATGGAGCGGGTGGTTCCGTG  
GCATCACTTGCTCGGGCTGATCACGCCGACTATGCCGGTGTCGGGGCGGCCAGGTC  
GGTTGTGGATCAGTCAGAAGGACTCGGCCATTGGCGGGAGCTTATTCATCGAGGCTT  
TCTTCGGTTTTCGACAGCGAGCTCTGCAGCTTCGGGAGCCTGTGCTTCCTGCTCGACA  
GGAGTGGCGGCGCGCTCGCTGGCTTCGTCTTCGGACTCGGCGGACTTCGGCTCGGCC  
TTGTAGACCATGTTGCCGTCGACCTTGATCCAGCTGATATACCGCAGACGAGCCTTG  
ACACTGACGCCCTGTTGCTGGCGCGCTCACCTTTTTTCATAGGTGAAGACGTCGGTC  
CACAGATCGCCCAGGCGAAAGCCGATCAGCACCTTCTTGAGATTAGGCAGGGATTC  
GTATAAAAAACAGCCAAAAGTGAGCTAACTACCGTCAATAAAGGATTTTTTCACGA  
ATTCCTGCCGAGCCTCGATTTCGGCGTGACCTGGGGTTACACCCCGGAACCCAGAA  
AGAAAGCTGCCTCGCAGAGCGAGGCCGTGAAAGACTGCGTGCTGTCAGGAAGGAAA  
ACGCCGCTACAAGGCAGTCACCCCGGATTATTCAGCGCGGAGGGCAAGGGCATCAG  
AACTCGTACTTCATCTTTGCGCTTAATGAAGGCGTCGCGCCCTCCTTCCAGAATGCTG  
GCCACCTGATCCCGCTTCCGGCCTCAGCTCGACGAGCTGGGCCGCTGTCATCGGCAA  
TGGCTGTCCGACCTGGACGCCTTCAAAGACTCGCTGCGCACGCAGGGCGCAGAACC  
CAAGGTGCTGGAATACGTGAACGAGGCTTTTCGGCAATCTGGCCGAGCGCATCAAGC  
AGCTTGCCAGTTAATCGTCAGGTCGGTCAACGGAGTGACACGACTGTTGGGTCTACC  
CCGTGTAACACCCTGACCTTCGTCAAGGATGAGGGATGGAGACACCCATCCCAGCA  
ACGCGGACCCGGTCGGTGCTATTTAGTCGCTGGCTTGAACCGGCCACTTTTTGCTTG  
ATTACGAGGAGAACTGATGATGTGCATGTCCATGCGTCAATATGCTGCCTGCGTTGC  
GCTGCTCGGAAGTTGCGTCTCGCTCGCCCAGGCCGCGCCAACCTGCAACAACCCGGT  
AGGCGAGTGGA AAAACAGCTGGGTTCCACACTCACGATACCGCTGTCCATACCT  
CCGGACAGCTCTTGGGCACGTACATCTCGCCTTCCGGCACCACTGGTGGGGTGTATC

CGCTAGTCGGCTGGTTTGCCAACCCGGTTGCCGGGTCGACGGCATTGAGCAAACCTGC  
CCGCCATCACTTTTTTCGGTGCAGTGGGGTAATTACGGCAGCATGACTGCCTGGACCG  
GCACCTGTGATGCGTCTGGCGGCGTACCGGCCATCACCACAGTCTGGCACTTGGTGC  
GGACCGGTTCCCAGTATTCGTGGGACCACATGCTCACCAACAGCGATGTTTTCGTCC  
CCAAATGACAGAGAGCTGTCGCCAACAAAACGCCCAGCGCAGAGGCTGGGCGGTTG  
GTGACAGCTCGCAGTATTCGTGAGACCAAGGTCATAGCCGGTGCCCCCTGCTCTTCA  
ACCAAAGGAAATGCTCAATGTTGCGATTGAACGGATTACGCGTGTTGTTACGGACGC  
TGGCGGCAATCGGCGCTTTGCTGACAACGGCATCGGCGTCGGCCGCCTGCGCCGAC  
CTGCTCGCGCTGTCGCTGCCGTCCACCACAATCAGCAGCGCTACCGACGTGCCCGCC  
GGTGCCTTCACCGCGCCGGACGGTACCGTGCTCGACGCACTGCCGGCGTTCTGTGCG  
GTCGTGCGGTGTGTGCGCGGCCGGCCAGCGATTTCGGAAATCGGGTTCGAGGTGTGGATC  
CCGTCCGCAGGCTGGAACCAGAACTACCTGCAGGTTCGGTACGGTTCGTCTTCGCCGGC  
AACATTCAATACAGGTGCTTGGTTTCGCCTTGCGCCGCGGCTATGCGACCGCAACC  
ACCGATGGCGGCCACCGGGCGTCGATCGGCGATGCGAGCTTTGCGCGCGGCCACCC  
GCAGAAGATCCTCGACTGGGGCTATCAGGCGCTGGCCACGACGATCTCCAACGGCA  
AGGCGCTGGTCTCCGCCTACACGCACCGCGCGCCGCACTATTCCTACTTTTTTCGGCG  
CCTCCAATGGTGGCCGCGATGCGCTGATCGCAGCGCAGCGCTTTCCGGGCGCCTTCG  
ACGGCATCATCGCCGATGCGCCTTCAGCGCCTGGGTCCACAACGCGTTTTCTGGC  
TGTGGTCGCAGGACGCCAGTTTCGGCAGTCCGGCGGGCGACTATCTCGGCGGCCAAG  
CTGCCGGCCATCCAGGCCGCCGCGCTCGCCCAATGCGATGCAAAGGACCACACGGC  
CGACGGCGTGGTCAACGACCCGCGCCGGTGCCGTTTCGATCCCCGCGTGCTGTTGTG  
CAGCGGTGCCGAGAGCGACGCGTGTCTACTGCGCCGCAACTGCAAACGCTCGCCG  
CCATCCTTGCCGGCCCCGGTCAACCCGCGCACCGGCGAGCGCATCTACTACGGTTTTCG  
AGCCGTTTCGCAGTCGCCACGCCGGGGACATGGAACCAGTGGATCACCGGCAACGCC  
GCCGTTCCCGGCGGGGGGCCATGCGGTGCTCGCCAACCAGTTCTTCGCCAACATGGTG  
TTCGATACCGGCAGCGCCGGGTTTCGACCATACGCAAGTGAACCTTCGATACCGATGTC  
GCCCCGCGCCGAACGCAAGCCGGTTCGCCGGCCAGCCGCTGGCCAGCGTCATCGACGC  
CACCTCCGTAGATCTGAGCGGATTTTCGCGCGCGCAACGGCAAGATGATCCTGTATAT  
CGGCTGGGAAGATCCGGTGGTTCCGCCGCGAGGCGCGATCACCTATTACGAATCGG  
TCGTGGCCAGGCAATGGCTGGACAACCCGCAGATCAGCAGGGCCGAGGATGCGCTT  
GCGCAGACCCAGCAGTTCTTCCGCCTGTTTCATGGTGCCCGGCATGGGCCACTTCACC  
GGCGGACCCGGCACGTGCGCCTTCGGCGCGCTGTATGGGCGCCCGCATTTGGCCATC  
GATCGCCAGCACGACGTGTTGGCGGCGATGGAGGCGTGGGTTCGAGCAAGGCATCGC  
CCCGGAACGCATCGTCGCGGCAAAATACGCCAATGACGACCCGGCCAAGGGGGTGG  
TCCGCACCCGGCCGCTCTGCCACTATCCGCAATCGGCGGTGTGGATCGGCCAGGGCA  
GCGCCGAAGATGCGCAGAACTTTATCTGTGTGGACAGTCCGCGCGGTGCCTACCTCG  
ACGCGGCACCTGCGCGCGCGCCGCTGCCAAGCTCGGCGCAAAGCCGATAAGTCGGG  
CGTTCTTGCGCCGCGCCTGGGTATCCAGCTTAGGGCTGTCCAGGCCCAGGACCGCCA  
TGACCTGCCCCGCCCCGGTTGACGCCCAGATCGCTCAAGGTGCCTTCTCCAGGCCGAC  
CAACGTCTTACGAGACAGGCAGCTCAGGTGCGCCAACCTGCGCTTGGGACAGGCCCA

GCTCAGCGCGCCGGGTCCGCACGGCATGGCCGATATCGATGAGATTTCATGGCAGAT  
GGCAAGCAAATAAAATGTCTGATATTTTGTAAATACCACCCCTGCGTGCCCTAACCT  
ACAAGAAGCGGATCCGTCGGCCCCGATCTACCCCCCCCACGCTGCCATAACTCTCAT  
CTGCCGAAATGTCAGGCAATTAGCGCTAATATCGTGGCAGAGCGTAACGGGGCGTA  
ATGCATGTTACGGGGGGGGGCACCACAGGGGATTCCATGGACGAGACACAACCGCA  
AGCTTCGGCCGTCGCTGCCGAACCTGAAGATCGACGTAACCCTGATCGCCAAATTGA  
ACTTGGCGGACTTTTTCAGAATGCAGTTCCACTGGTCCGGGACCTCTGGCTGATCAACG  
AAACCGATCAGGTACATGAGCAGGTCGAGTTAGTCCTGACGTCCGACCCGCCTTTTC  
TTAAGCCGCGCCGTTGGCGGATTGATGCGCTGGCAGCAGGCTCCCGCTATCCGATCC  
GCGATCTGGATGTGAACCTGGATGGTGGACTGCTGGCTCGGCTGACCGAAGCCGAG  
ACGGCCACGGTTTTCTCTGGCATTGCGTTCCGTGGCCGCGGATGCCTCCAACACAGCT  
CTCGCCCAGCGCGATACCCATCTTGAGCTGCTGCCACGCAATCAATGGGGCGGCATC  
TCGCATCTGCCCCGACCTGGTCGCCGCGTTTCGTTTCAGCCCAACGATCCGGCCGTGGAT  
CGGCTACTCAAGCGCACCGCCGAGGTACTGCGTCAGAACAAATCGCAACCCCGCACT  
GGATGGCTACACCGGGCGGGCGCCAAGCGCGCCTGGGAACCTTGCCTCGGCCCTCTGGG  
GGGCCACGGCTGGCATGCAACTGGACTATGCCCTGCCCCCGCCAGCTTCGAGCAAT  
CGGGCCAGAAGGTGCGCAGCCCCAGCCAGATCGAAAGCTCGGGCCTGGGAACGTGT  
TTCGACCTCACGTTGCTGTTCTGCGCCGCACTCGAGCAGGCAGGCTTGAACCCCTG  
CTGGTCTTCACCGAGGGCCATGCCTTTGCAGGCGTCTGGCTGCAATCGGAGGAGTTT  
TCAAATACGGTCGTCGACGACGTGACCGCATTGCGCAAGCGCCTCAGGCTCAAGGA  
ACTGGTGCTGTTTCGAGACCACTCTGATCACCCAGCGCCCCACCGTTCCCTTCAGCTA  
TGCCACCGACCGCGGTGCCAGCAGGTTGACGAATCTCAGGATGCGGGATTCCGCC  
TGGCCGTGGACATCCGCCGGGCGCGGCTGCAGCGCATCAAGCCATTGGCCAGTGCA  
GAAGCGGCAGTTGCTGCGGTGTCAGACAGTGAAGCGACGCTGTCTTCACCCGCCGT  
ATCAGTGATCGAAGACGCGCCTGACCTTCCCGATAGCCCGCCATTCAAAACAGAAG  
ACGCCAGCCAACCTTGATCCCAAGGACCGGTTGCTTCGCTGGCAACGCAAGCTGCTG  
GATCTGTGCTTCGCAACAACCTTGCTCAACTTCAAGGCCGGCAAGAAGGCACTCAA  
ACTGGAAGCACCGGACCCAGCACGCTGGAAGACCTGCTGGCCAGCGGCCAGTCCC  
TGAAGCTGCGCCCCGCGCCCCGACCTGATGGACGGCGCTGATCCACGCGATCAGGCC  
ATCTACGAAGCCCGTGAAACGTGAGAACGTGCGCCGCGCGCACGCGCTGGAAGCCCT  
GCAGAAACGCGAGGTTTTTCGTTGGCGTTCCCGAAACCGAGCTCGACTCACGTCTGGT  
CGATTTGTTTCGACGCGCTCGCACGACCTTGACAGGAAGGCGGCGCCAACACGCTTTA  
TCTCGCGCTGGGCTTCCTGTCCTGGACCCGTGAAGACCGTGACGGTCAGCGCTACCG  
CGCCCCCTTGGTCCTGGTGCCGGTCAGCCTGCAGCGCAAGAGTGCTCGCTCGGGCTT  
CACGCTCAGCCTGCATGACGATGAGCCTCGCTTCAATCCGACCTTGATCGAGATGTT  
GCGTCAGGACTTCGAACTGAACCTGGGCGCGGTGCAAGGCGAACTGCCGAGAGACG  
ATGCCGGCTTGGACGTCACTGCGGTCTGGAAGGCTGTGCGCCACGCGATCAAGGAC  
ATCAAGGGCTGGGAAGTGACCGAGGACGTGGTGTTGTCCATGTTCTCGTTCCGCAAG  
TACCTGATGTGGAAGATCTGGCCGAGCACAGCGAGCAGTTGCGCGAGAACCCGGT  
CGTGCGCCACCTGCTGGACACCCCGCGCGATGCCTATCCTCCGGGTGCTCCGTTCCC

GCAAGTGC GCGAACTGG ACCAGCACTTCGACCCCAAGCAGGTGTTCTGCCCCTTGCC  
GGCGGATTCTCTCGCAGTTGTCTGGCCGTGCTGGCCGCCTCGCAGGGCAAGGACTTCGT  
GCTGATCGGTCCCCCTGGGACCGGCAAGAGCCAGACCATCGCCAACCTGATCGCCC  
AATCCCTGGCACAGGGCCGGCGCGTGCTCTTCGTGTCCGAGAAGATTGCGGGCGCTG  
GACGTCGTCTACCGGCGCCTGCGCGAAATTGGCCTGGGCGAGTTCTGCCTGGAAGT  
CACTCGAGCAAGGCCCGCAAGCTCGACGTGCTGGCGCAGTTGCAGTCGGCTTGGTC  
CAGCAGCGGCCAGACCGATGCCGAGCAATGGCGGGCCGAAGCCGAGAAGCTCAAA  
CGTCTGCGCGATGCGCTGAACATCTATGTGGAACGCCTTCACCAGCGTCGCCGCAAC  
GGCCTGAGCCTGTTTGATGCTATCGGCACCGTCAGCGCGGGACACGACATCCCGAC  
ACTCCCCTTGGCCTGGCTCTCGGCCGATCAGCACGATCATGCCGGCATCGACCAGTT  
GCGCAGTGCCGTGGACCGCTTGGAAGTCAATGCACAAGCCATTGGCCATGCCGCGC  
TGGCGCAGCACCCCTTGCGCTGGTTCGGCCATAGAGACTGGTCGCCACCTGGCAA  
CAGCAACTGATCGCCGCTGCGCGTGACGTGCTTCCCGCCGCCAGGGCGACAATCGA  
GTCAGCCCACGCGTTTGTCCAGGCCATTGGCCTGCCCTCGCCCTTGTTGACGCCCGA  
AACCTGCGAAGCGCTACTGCTCCTCGCCCAACGTCTCACTTTGGCAGCGGGACACGA  
TTGGCGCTTTGTCCTGCGGCCCGACGCACGCAGCCTGAGCCAACGCCTGCAGGAAG  
GTGCGGCACGGGTGCGCCGCCATGCGGAACTGAACACGCTGCTGTCCACGCCGTGG  
CCCGCTTCCGTCTATAACCGCCTGCGCCGACGGGCTGGCCCTGCTCACCAGACCCGG  
CAGACTCACGCAGAACTCGGCGAGCCCTGGCCGGTACGCATCACCGTGCAGCTCAA  
CCAGGCGCTAGGCCTGCTGGCCCAGCTCAGCGAGCATCATGCGGCCCTGTTCGGTTCC  
CTACGGCAAGACGATCGAACAGCTCGACGTCGCCCAGTTGCAGCAAATGTGGGAAC  
AGGCCGAGCAGACGTTCTGGCCCAAGTCGTGGCTGGGCAAACGCAAGGTCACAACT  
CAACTGTCCAGCGCCACCACAGGCGGCTCGCAGCCTGACGTCGCCAACGATCTGCA  
GCATTGGAATGCCATCCGCGCCTTGCGCCAACGGATCCAGGCAATCGATCCAGGCC  
AGCAGTGTGCGGACGTCTGGGCAGGACTTGACACACAACAGGACAAGGTGAGCACG  
GCCCTGCGCTGGCAAATCGCCCTGGCTGCCGTACTCGAAGGCCAGGCCTGGGAAGA  
CGACGGCTTCGACGCCATCGCCGGTGGCCAATGCGGAGCCACCCTGCAGGCCGATC  
TGCAACGGGCACGACGACTGCGCCAGCTCGACCAGGACATTGCTGCACATGCATCG  
CTGGAAACGGCGACCGACGGCCTATGGGCAGGCCATGCGACGCAATTCAACTGCCT  
GCGTGCCGCACTCGACTTCCTTAGCGACTGGCGCAGCCATGCCCAGCAAGGTGCATT  
GGATGCCCACACCTTG GTTGAGGAAGGCGCTTGCGGCCCCACGCTGGCACGCGACC  
ACCAGACGCTTCGCCAGCGGGCCGATATGGAACAGGCGCTGGCTGCCCTGGACGAC  
TTGCGCGAGTCCACCGCAGGCTTGTGGAAGGTCTCGCGACCAACCTGGATGACCTC  
GAACAGGCCTGCCAGCTCCGAGAGGATCTGGCAGCCGTGCTGGCCCCGCTGGCCAC  
TACGCCCGAACATATCTCTGCCTGCAAGGCACCGCTGCATACGTTATTGGGCGATGC  
CAATGCACTGCTGGAGCCAGGTGGTTCGAATCGCGCTGGCCGGCGCCCCGATACGTGG  
AAAAATGGGAACAGCTGCTACCCCGGCGCGAGGCACTCGCGACCACCGGACATTTT  
GCCGAGGCCGCCAGACGCAGTGGCAGTCCATGTCACTCGACGGGCTGATCGAGCA  
AAGCCAGTCCATCGTGCGCGCCGAACACGGACTGCGCAGCTGGTGCGCATGGCGCC  
AGGCGCGCGACGAGGCGCTGGCACTGGGGCTGGCCACGCTGGTCCAGGGCATCAAG

CAAGGCCAGGTCGGCCCCGACCAGGCACGCCGAAC TTTTCGAGGCCAACTACGCGCG  
CTGGTGGCTCAACGCCGTGGTCGATCACGAGCCGGTCATCCGCGGCTTCGTTCAGCGC  
CGAGCACGAACAGCGCATCCGCGATTTCCGCGAGCTCGACGAGCGCTTCACCGCCC  
TGACCCGGGACTGGCTGCGCGCCCCGCCTGTGCGCCGACCTGCCCTCGCAGGACAAC  
GTCAGCCGCAACTCCGAATGGGGGCTGCTACGGCACGAGATGGGCAAGAAGCGTGC  
GCACCTGCCCTTGCGCGAACTGATGGCCCAGATTCCCGAGGCGCTGACCAAGCTCAC  
GCCCTGCCTGCTAATGAGTCCCCTGTCCATCGCACAGTACCTCCAGGCCGGGGCAA  
CGCCTTCGACCTGGTGATCTTCGACGAAGCCTCGCAGATCCCAGTCTGGGATGCGAT  
CGGCGCCATCGCCCGCGGCCACCAGGTCGTTCATGGTCGGCGATCCCAAGCAGTTGC  
CGCCGACTTCCTTCTTCGACCGCGCCGAATCCGGGCTGGACGACGAAGACGTCGAG  
GCCGACCTGGAGAGCATCCTCGACGAGTGCATCGGTGCTAACCTGCCGACACGGAA  
TTTGAAC TGGCACTACCGCTCCCGTCATGAAAGCCTGATCGCGTTCTCCAACCATGC  
CTACTACGACGGCGGACTGGTCACCTTTCTTCCCCCGTCACCAACGATCGCGCGGT  
CAGCCTGCAGCCAGTCTCCGGCACTTACCAGAAAGGCGGTACACGGACCAACCCGG  
CCGAAGCGAAGGCGCTGGTGGCCGACGTGGTGGCGCGCCTGACGGCGCCTGGCTTC  
CGCGAAAGCGGGCTCACGATTGGGGTGGTCACCTTCAATGCCGAACAGCAGAAGCT  
GATCGAGGACCTGCTCGACGAGGCACGCCGCCAGGATCCAAGGCTGGAGCCCTATT  
TCGCCGAGAGCGAACTGGAACCGCTGTTTCGTCAAGAACCTGGAAAGCGTACAGGGC  
GACGAACGCGATCTCATCTATTTCTCCATCACTTACGGTCCGGATCCCGCAGGCCAA  
CTGGCCATGAACTTCGGTCCGCTCAACCGTCAAGGTGGCGAGCGCCGGCTCAACGT  
GGCCATTACACGCGCACGTACGAACTGCGTGTATTCGCCAGCTTCACGCGGAGCA  
GATGGATTTGGCGCGAACGCAAGCAATCGGCGTGCGCGACCTCAAGCACTTCCTGG  
AATTCGCCGAACGCGGTGCCCGTGCGCTGGCAGAAGCCAACTGCGGCAGCCTGGGT  
GGCTTCGACAGTCCCTTTGAACAGGCCGTGGCCGCAGCCCTGGCCCGGCGCGGCTG  
GCACGTCCAGCCGCAGATCGGCGCCTCCTCCTTCGCGATCGACCTCGGCATCGTCGA  
TCCCGACGCGCCTGGACGCTACCTGGCAGGTGTGGAATGCGATGGCGCCACCTACC  
ATCGCAGCGCCACCGCACGCGACCGCGACAACTGCGCGAGCAAGTCCTGCGCGGC  
CTGGGATGGGACATTGTTCGCGTCTGGTCCACCGACTGGTGGATCGATCCGGCCGGC  
ACGCTCGACAGACTGGATGCCCCTTGCAAGCCGTACTCATAGCCAGCGCGAGCA  
GCGCGCCGAACAGGCCGAGCGCGATGCCGAGGCCGAGAGCCTGGCGCAAGCGGCC  
ATCGCGCAGGCCATAGCATCGGTGACGAAGCCAGACGGGGAAATGGCGCCCCCAGC  
TCAGGACGCGGACCCGATCGCACCGGAAGTCTCGGCGACAGCTCCATCACAGCAAG  
TCGAGGAAGTCTTTGCTCGCCAGGTCTCCGCAGAAGCAGCCCATGCCAATGCCGAA  
GAAACAACGCCACCGGAAGCCTCGCTCTATCGGATCACCGATCCCGCCGAAGCTGT  
GACCGGCGCCAATCCCGATCGCTTTTTTCGACGGTGAGTACAACGACATCCTGTTGAC  
CATGATCGCCACGTCGTCGATCACGAAGGGCCCGTGCTCGACGCCCTGCTGGCCCCG  
CCGCATCGCCCGTGCCACGGCTGGCTGCGTACAGGCGGACGCATCCGAGAGCGCG  
TTTTCCAAATCGCGCGTCCCCGCTATCGGACGACCGATGAAGAAGTCGGCACGTTCT  
ACTGGCCCGAGCATCTGGATCCTGCGACAGAGCCTCCCTTTTCGCGAGCCCGCCGACG  
AGGACAGCGTGCGGGCCGCTGATGAGATCAGTATCGCGGAATTGGCCTCCCTGGCT

CGCGCCGTCATCGCACAGGGCACCCAAGGCGAAGGGATCTATCAAGCAATGGCGCG  
CAGGCTCAGGCTCCAACAGCTACGAGCAGCCAGCCGGGCACGTCTTGAAAATGTTG  
TGCGCTCTCTGCGTGCAGAGCCATGACCTGAAGAGTTCGCCGACAGAACATGGAGG  
GAGCTATGCCAAAAACCAGGCAACTCGGACAAAAAATGCGGCTATCACAACGACG  
CTTTCACCTACGCCTGCTGCGTCCCGATAGGACAGTCGAGCAAGCGATCAGAGATAC  
GAGCGCTGTGGCAGAGGTTGAGTGTGATTCTGGTCGCTTGTTTATAGCACAAGCTCC  
TGGAAC TCCCCCACTTG GCTCAGGGTCGTGAACCAGTTCACCAAACAGGGAGACC  
TGAAACTCGAGAACAAGAGCTGTGCAGCAGTCCTATTTCTCGATATTCAGCCAGATG  
ACAAGAGATTGCGAACTCGCACCTTTGCGCTTACGTTTCGGCAGCGGTACCATGCCC  
TCGATACCGATGCATTTGTCCGAAACTTCGGCCTGAAGGTCACGCTCAACTCTGTTG  
CGCGGGGCGCACTAAAGAATCTTGATATCGCCACGCTCGACAGTACGACCATT CAG  
AAACGCATTCAAGCAAGTAGAAAAGCCGATCTACAGGGTTTTTGGAATTGATCTCCA  
GAACGATCTGTTGCGTCTCGCCGGTGGAGTTCCCAACGACACGTCATTTGCAAATGC  
GCTTG CAGGAAGAGACGCACTACCCTAACCAGCAAGCTCTCAGCAACTGAAATTC  
CTGAAAAATGCAAAACGGCGCTTAGGCTATTTGACGCCAACGATTACAAGAAAGAC  
TATTCCTTTATTGATCAGATAATTCCCGTCCTGGACAAGAAAACACTTG CAGATCTC  
GATGATATTGTCTTTAAAGAAATAAAAACCTTACTTGATGGAAAACCGTCAGACTTA  
CACATAACTCTGCCGGAGATCATTGATCCGGAAGAGTCGAGTGACTTCGGATATTT C  
GGCATAGGCTTCAACTCTGGATCGAAGAAATCTTACGGCGAGCTTGCCATCGAGGA  
CTATATTCTCGAATTACAGGCTGGACGGCCACAAGAAATTTCTGACATAACAGAATT  
AAAGGCTAGCCATGAGATCCGAGTTGTAATTGACGGTCACGGAGATCGCCAGAGGC  
GGCGACGAGTCTATGATTGTTTTGTGTACGAAGTGATCTACAAGAAGAAAACCTACG  
TGCTTTTCTCTGGAGAGTGGTATTGCATCGAAAGCAAGTTTTTCGACGCAGTGGA  
AAAGACTATCAGGCGCTACTGGGGGTTTCATTCCACTTAAAAACGAAAGCCAAAAAT  
GAGCAAGAGCTAATCTCAGAGCTCGACAAGAATAGCAACCTGCTAAATCTAGATAA  
AGTGAAAGCCTCGCCGTCAGGGGCAAAGGGCGCCAATCTTGAGCCTTG TGATTCTT  
ATCTCGCCGAAAGGAGTTTATTCACCTAAAAGACGGCCACGGCTCCGCCCCAATTAG  
CCATCTATGGAATCAAGGGCTCGTCTCGGCAGAAAGCTTTATTCGTGATGACGTTTT  
TCGAAAATCCATGCGAGACTCGGCAATCAAGCGACAAAAGGCTGCAAAAAAGTCAA  
AATTTGAGCTATTGCTACCCGATGGCCGTTCAAAGTA ACTTCCACGGACTACAAGG  
TGGTTTTTGGCATAATGCGACATCCGTACCAGCGGAGCAAACGACTCGGCCTTCCGT  
TTTTTAGCAAAGTGAGTCTTCGTGCCGTCGCAAGCCGGATCCA ACTAATGGGCTATG  
CCGTGGAAGTACACCTTATTGAAAAGACATAATAGGCATGTAAGAAACCATGGAGG  
TTACGCTGGAACCTACTGGAGATGGCTCCAGCACGATCGACCCACTCGATCATCAAC  
AGATCGCGTAAGTCCGCGTAAGTAAAGGGATTATCTGCGAGGGAATTAGCTCAATT  
GGTAATCCCCCGCTTTTAGCGGACTCCAGAAGTGGAGTTATGCAGCCATTGCCAGT  
TTCATCGCTGGCGTGATGCCGCCTAGCGCCATGTTCCGGGCTCATGGTTGTAAGTCCA  
TAGCCAGCGCGTGGCTTTGTCCTGCACCTGCTCGATGGTGTCGAACAGGGTGCGGGC  
CAGCCAGGCGTAGCGGACCGTGCGGTTGTAACGTTCAACGTAGGCGTTCTGTTGTGG  
CTTGCCCGGCTGGATGTGCTCGATGCGGATGCCGTTGCGTTCCGCCACGCCAGCAG

TGCTGCGCTGATGTATTCGGGCCCCGTTATCGCAGCGAATGACGCGCGGCTTGCCGCG  
CCTACTCGATGACCTGCTCCAACGATCGGATCACCCGGGCAGATGGCTACTACCACGT  
GTCTGACAAATACGTGGCGCTGTTTCAGCCACTTCATTCCCTGTGGCGTGACGAGGG  
CATCTACATCCTCGACGGCCTGTTGGCCAACTTCCGACATCCAGCCTGAGATCGT  
CCATGGGGACACGCAGGCCCAAAGCTATCCGGTCTTCGGCTTGGCCACATGCTGG  
GTATCCAGCTGATGCCCAGGATCCGAAACATCAAGGATCTGACGTTCTTCCGACCCG  
AACCAGGGCAGGGCCTATAAGAACATCCAGGCGCTATTCGGGGACAACATCGACTGG  
CAGCTGATCGCCACCCATCTTCACGACATGCTGCGTGTGGTGATCTCCATCCGACTG  
GGCAAGATCACCGCGTCCTCGATCCTGCGCCGGCTTGGCACCTACAGCCGGAAGAA  
CAAGCTGTACTTTGCTTTTCGGGAGCTGGGCAAGGCTGTTAGAACACTGTTCTTGCT  
GCGCTACATTGATGACAACAAGATTTCGAAAACGATTTCATGCCGCGACCAACAAGA  
GCGAGGAGTATAACGGCTTCGTGAAATGGGTCTTCTTTGGCAGCCAAGGGATCATTG  
CTGAGAACGTCCAACACGAGCAGCGCAAGATCATCAAGTACAGCCAGCTGGTGGCC  
AACATGATCATCCTCCACAACGTGGAGGGTATGAGCCGGACGTTGGCTGAGATGCG  
GAAGGAGGGGGTTCGAACTGACGCCCCGAGATCCTGGCCGGTCTGTGCGCTTATCGGA  
CCAGTCACATCAATCGCTTTGGCGATTACCACCTAGATCTTGAAAGGGAAGTGGCGC  
CCTTGAGCTACACGGCCAAGGTCCTCGAACAGGCCCCATAGATGGGGAGATTACCC  
ACGCGATGAGAAAATAGCCTTATACGTCAGCCGCTTAGGCTAGTTCTGGCCCTGTAC  
GTAATGATTCCCTGCCGACCCTCATCTACGAATTGCGTGGTTCGACGACATCAGCGT  
CAAGAACGAGGCCAACGGTTTGTACTGGGACGAATGCGATGGCGGGTGGAATGAT  
GGACGGAATTTTCTGGGGTTCCGGCTTACAC

>CONTIG\_15\_length\_13718\_cov\_238.534913

CCTGGCCAAGAACACCGCACACATGCTGACCTTGTTTGCGCTCTCCAATCTGTGGAT  
GAAGCGAAAGCAGTTACTGCCGACTATGGGGAGCGTGCGCCTGTAACCCGGGGAAAT  
TCCCAAGGAAAGTGACAGAAATGGCGGAAGATCCGAAGATCCAAACGCGACTCTCC  
GGACCGACGCGACATCCCGCACTCTCAGGCCTCGTTATTCAGACCTTCCCTAAAGGG  
CCATGGCCTCGTGTCGGATGTGGACCAGCATGAGCGCGTGACCATCCGACCAATCAT  
TGTGCACTTGGCCAATCCCGAGAACCTGACGCAGTTGATTACGCCCTACGCGCAGT  
CGCCGACGGACAGGCTGAATCCGCCTGCTCTGTAAGTGAAGATAGATCCATGAGCAC  
GCTAGCCGCGCCGTCCTCGGAAGCTTGGTGCTTACGCACCTAGACATCTACGACTG  
GGGCGCCTTCGGCGGCCGTCACAGCGTACCCATAGACGTAGCCGGCACCGCCATCA  
TCGGCCCCACGGGCAGTGGCAAGACAACCTTGGTCGATGCGCTGATGACCCTCCTG  
GTCGCCGTTCCGCGCTACAACCTAGCCTCAACCGGGCGGGCATGACAGCGATCGAGA  
CTTAGTGTCTTATGTGCGTGGTGTCTCGGGCGCCGGCATCGGCGGTGACACCACCGA  
TCACATTAGCCGCCCCGGCTCCGTGGTGACGGCCGTTTCCGCGCGTTTCAGCGATGG  
GGATGCAGTGGTACGCATCGGAGGGGTATTTTGGTTTGACGGCAGTAGCTCGGCGA  
CGACCGACCTCAAGCGCCGTTGGATCTTCTGTCTGGGTGATTCCACCTCGCTTGATG  
ACTGGCTCGAAGCGCACCGAGAAAATGGCGCGCGCGCCCTGAAAGAACTGGAGCGC  
GTCCACGCTGGTTTCAAACCTCTACGAGAGCAAACAAACATTTTGGCACGATTGCGT  
AACCATTTTGAAGTCACCGAAAACGCCTTCGCCCTGCTCAACCGTGCCGCGGGCTTG

AAGCAGATCGACAGCATCGACAAGGTGTTCCGGGAAC TTGTACTCGATGATCGTTCC  
GCGTTTGAGACCGCTAAGTCGGTGGTCGATGAATTCGCGACCCTCGCCGGCATAACGA  
CAGGAGCTGGAGACGGCTCGACGCCAACGCGAAAGCCTCGTGCCCATCGACAAGAG  
TTGGGGTCAGCACGTCGACATTTCAAGTCGACGAGCGAAAGCGCCTGATCA  
GCTTGCTCCCCATCTGGTTTGCCGAACGCGTGATGGGGCTATGGCATGTCCAGCGTG  
AGCGCGCGGAGGCAGAGCTGCTTAAACGCCAGAGTGAAAGTGACGAACTTAAAGG  
GCAGCTCTCGGCAGCAGAGGCAGCAGAAGAGGCGTGTCACGCCACCTACCTGCTGG  
AAGGTGGACAGGATATTGAGAACTTATCCAAGCACATCGACCTTCAGCGCACTACTC  
GCGATCAACGGCGACGCGATGCGAACGCTTACCAAATAATGGCACGTGCTCTGGGC  
TTACCGTCTGCTCTGACCGCCGCTGACGTCGCAGCAAATCGCGCCAGCGTTGGCCCG  
CGACGCGCGGAAGAACAACAGCGCCACCAAGAACAAAAGCGCGCGGCCTGGGATA  
TGGGAGCCCAACACGCGAGCCAGTTGGCCGATCGCGAGCGCGTCGGCCAAGAGCTT  
GCAGCCGCTAAACGCCGTCCCAAGTCCAATATCCCCGATGCGCAATCTACCTTTCGC  
GATAGGCTGGCTCAGCATCTGCGATTGGACGCAGAGGCGTTGCCGTTTGTGCGCCGAA  
TTGATCGAGGTCCAATCACCCCAACACGCTTGGCGTGGTGCCATTGAACGGGGCTATC  
GGTAGCGAACGCTTGCGCATTCTCATCGCACCTGAGAATTTGGACGAGGCGCTGAA  
GTGGGTCAATGGACGCGATACCGGATTGCATGTGCGCCTTCGCAAGGCCAGCATCC  
CTGACGGGCAGGCTCGGTTCTTCGATGACGGCTTCACCCGCAAGCTGAACTTCAAGC  
CGCACGCGCACCGTGAAGCACTCAAACATCTCTTGGGCGATATCGACCGACACTGC  
GTGCCTGATGTTGATACGCTCAATCGCACCCCTCATGCAATGACCGCCGAGGGACTG  
ATGTGCGGGTCGCGCCGGCTTTTTTGATAAACATGACCAAAGGCCGTTGCATGCCGAT  
TGGATGACGGGATTCGACAACCGCGATCTCGTCGCTCAGTTGACGCGTGATTTAGCA  
GCGGCCATTGATCTTCATCAAGCAAGCCAAGAAGCACTCAAGCTCGCCGAAGCTTT  
GGCAGAGGCCACCGAGCGTGTCTTGGGGTTCCTTAAGAGCCTGGAAGAGACGTCGT  
TCGAGACCATCAATGTAGTCAGCGCAGAAAACGCACTGGTTTCAGTTAGAAACCCAG  
TTTGCTACGCTGACCAACCCAGAATCCGACGCTCAAGTGGCTGCGAAGCGCTGGCG  
CGCTGCCCAAGAGGCCACGCGCGACGTGCGCCAGGCACAGACGAACTTGGAAGTG  
CAATCTCGAAAGTCCAAGACACCATCGATCGGGCACACAGAGCACTCCAGAAAAAT  
CGGTTGCGCATTGGTGAGGGTTTGATGGACGACGAGCGGAGCTGGGTGATCAAAA  
CATTGACCTGCCCTCTTTCACTGATCCCGCGCTCTTGGCCGATGTCGAACGCACAGC  
ACGCGAACGCATTGAAAGCGAACGGGACTCTTTTGCCAATCGCCTTAGAGGCATTG  
AACAACAATTGATTCGGGACATGGGCAAGGCAAAGTTGGTCGACACTGGTGCGCTC  
ACCGAAGCGGCGACTGAATTACACGATGTGCCAACCTATCGCGAGCGCCTTCGGAT  
CCTTGATGAGGAAGCCCTTCCTGAAAAGATCCATCGTTTCCAGCAATATCTCAACCA  
GTCCTCAGATCAAGGTGTGACACAACCTGTTGAGCGACATCGCCAACGAGGTCTCTGG  
CATTGAAGAGCGCATCGCCGACTTGAATGCCACGCTCAAACGCGTCGATTTCCAGCC  
CGGGCGCTACCTACATCTTGAGCCTCAACGGGTCGAACACGAGAGCTTGCGCGCCCT  
GCGCCTGGCTCAGACGCACTTGCGCTCGGCGCAACTGAAAGACGATGGCGGTGAGA  
GTCATATCAAGCTCTCACGCACGTAGTCAAACCTGCTTCAGGAAGCCGCAGACCGA  
CGCAAACCTGCAAGGGTCTCTCGCCCTATTGGATCCACGGTATCGACTCCAATTCGCC

GTGTGGGTCATCGCGCGTGATGATGGCCGAATCATTGAAAAGCGCACTAGCTCTCAA  
GGAGGAAGCGGCGGTGAGAAAGAGATCATCGCCAGCTATGTGCTGACCGCATCGTT  
GAGTTATGCCTTGTGCCCACCGAACCGGCAGCATCCACTCTTTGGCACAGTGGTGCT  
TGACGAGGCTTTCTCAAAGAGTTCTCACGCCGTCGCTGGACGCATCATCCGGGCGCT  
CGCCGAATTTGGCCTACATCCGCTTTTTCGTGACCCCAAACAAAGAGCTGCGCCTGTT  
ACGCGATCACACCCGCTCAGCCATCGTGGTGCATCGACGCGGCACTCAGGCGACCG  
TGACGTCACCTACGTGGGAGGAGCTGGAACACCATGCCCGTGAACGCCGGAACGC  
ACGGAGATGACCGTTGAAATCGCCGAGTGAAGCAGCACGACTTCTCGCTCGGCACT  
GGCAGGACGCCGGCAAGCGGGAGCGGCAGCTGCTGCAACCCGATGCATGGCCAATG  
CTCGTCCCGATTGGGCGCCCCACCGCGACGGAATTCACCAACGAGACCTCGCGTGTG  
CGCGCGCATATGGAAGACTGGCGGGCGGTCACTGTAGGTGAAGTTGTGCGCCGAACC  
TGTGCGCTTTCGCAGCGGAGCCGAACCGGTGATGGTGCCACGCATTGGTCCTTGGC  
CTCAGCTGCAGAATGGGCAGACGCGTCGAATGACATCGCCATACAAGGCGAGCAAG  
CCGAATTAAGCCAATTGCTCGAAGCCATCCCACCTATATTCCATCGACTGTTGGTCC  
GCCAGCGAGGTCTTTGGCGCACTCGATCCCGCGAGGAGGTGGTGCAGGCCACGGCG  
CTGGCCCTTGGTCTAGAGCCGGGCATGGCCGCGGGACGCCCTATGCGCAGCATCGC  
GGTCGCAGGCATCGACAGCAAATTCATGGAGCGCCACGGCGCTTTGGTGACGGCGC  
TGTTGGATGTGCGTTTCGAGGGTCAGGCGTCCAAACAGGGAATTGTGCGATTCTTGG  
ACGCCGCCGACGAAGGCGAGCATTGGTTGCTGGTGGCACCCTTATCACAAGGCTTG  
CTGCCGTTTCGCACGTCAGCGTGTGCGTGCTCGCGAGTTGGTGGAGGTTCCCTTGCCC  
GCCGGCCGGATCTTGGTCGTGGAACGACCGTTGCTTGTCATCTACTGCCACCCATG  
CCAGACACCATCGCCGTGTTGGGCGCCGGGCTCAACTTGGCTTGGCTTAGCGCGCCC  
TGGTTGCGAGAGAGGGACATTGGCTACTGGGGCGACTTGGACACATGGGGACTACA  
GATGTTGGCCCAGGCTCGCCGCCTTCAACCCAAGGTCGAAGCGATTCTCATGAATCA  
CGCCGTGTTTGAGGCACACGGGTCCAACCTCGGCCGTCTGTGAGGACACTCCCGCATT  
GCCGGAACCGCCAGACGGCCTTAACCAAGAAGAGCAAGCACTCTATTGTCATCTGC  
GAGGCCTATTCAAAGGACGACTGGAGCAAGAATTCTTACCTGCAGCGGAGGTGGCA  
AATGCACTCACAAAATGGGGGTATTCCAACGGTTGACCACTACATGGATCCATGTGCG  
CGACTATCTGGTCCGACGCATCCCATGGCCGCCCTACCCCTGATAACGCTTCCTAAT  
CGATAGCTAAATTTTCTCCAGGCTGTCTCCTCAGCCACGCCCGTTGTGCGCCAGAA  
ACGGAGATTTTATCTCCACCAAATTTCCGGGAATCGCCAGGTAAAGATGCCGACTC  
GTGGTCTCCTTGACTGCAACATGGCATCATCTCGCCCGGGAGAACACCTTTCGGGGA  
AATACATGGAAGTTGATACTGCGCCTGGCGCGGGCGGGTTTTTGGCGGCGGTCTGCTG  
CGTTCTTAGTCGATTGCCTGGTGCTTGGCGTGGCCGGCGCGTGTGGCAGGCTGGGCGT  
TGCTGGATGTGTTTCGTGCGGATGGGCGGTTATGGGCGTTTGGTTCGATTCTTCATTG  
CACTGACTTACTTCGGTGTGATGAACAGCGTGCTTTGCATGGGGCAGACCCTGGGCA  
AGCGCCTGCTGGGCGTGCGCGTTGTTGGCAGGGACGGTGCCCTGCTGGCCCTTCCCC  
AGTCGCTGCTGCGTTACTCGGTATTGGGTGTCCCGTTCTTCCTCAACGGTGCACAGTT  
CGATCGCGATGTGTTGCTCTCGCCGCTGCAGTATGTGTTGACGCTGCTGATCTTCGGC  
GGGACGCTCTCGATCCTTTATCTGTATCTGTTCAATCGCCGCGGTGCGCCGGTCGTTGC

ACGACCTTGCGGTGGGAAGTTCGGTGGTGACCGCGCAGACACCGCTCGCCGCTGTC  
AGGCCGATGCCGGTGTGGCGTGTGCACTTGGTGGTGGTCGCTGTGTTGATGATCGCA  
GCCGCAGCAGTACCGGCGTTTACCGGGCAACTTGCGCAGAGCGATTACTTCAAGGA  
CTTGCTGGCAGCCCATGAAGCCGTCAGTGCCGAGCCGGGCGTGCAGTCCGCGCGCG  
TCGTGCACAATACGGCGTTCGGCACGCCGAATGTCGAATCTGTGGTTGTGCAGGTCA  
ACCTGTCCGAACGGCGCATCGACGACAAAGCGTTGGCGGAGCACATTGCCAAGGTC  
GTCCTCGCCAACGACAAGAAGGCGGCCGCCATGTCGGCCATCCACGTCACGCTGGT  
CTATGGCTATGACCTGGGCATCTCATCGTCTGGCGCTCGATGGGTTATAAGTTTCG  
GCCGAAAGCGTTGGCGGCTGCTGGTAGCAACGATACCGAGGCGGGAATCAGAAGGT  
AGCGTCTCCTGCCCTGCCGAAGGCAATGCCTGCGGTGCGGCATGAGATGGGGTATTG  
AGGGGTATTGAGGGGCCTTGCGCGGCCGTGCGGCCCAGGTCGTTGCCAAGCCTGAA  
GGCAGCGCGTCGCTGCAAACGTGGGCGCCCCATTCCGCTGATACGAGCTGGTTTCCT  
GGGCAACCGGCTGTAGTGTTCCTGCAGCCGGTTGCCGCATGCGCTTAATTACCAGCA  
CCTGGTACCGAGTGCAGAGAGAGGACGCGGCAGCTTATGTAGCTCACCGCATCTCG  
GAACGACGCCTGCCTCAACCGGCGATCGTAAAGACAGATCCCGAATCCACCCGGAT  
CCCGGCACCGTTGATGAAGCTGGCGCGCTCGGAGCACAGGAAGGCAACTGCCGCGG  
CCACTTCCTCGGGGCGGCCGCGTCGCTTGAGCACCATGCCGGGACGTTCTTCGTCCA  
GGAACGATTCGATCGCCTGCTCGAACGTGGTTCCGTTTTTCGCTTGCGCGTTTTGTGCAT  
CATCTTGTGCGTTCATCGGGGTGCGATGAATGCGGGCGACACCGTATTGACCAGCAC  
GTTGTCCGGTCCGTAGGCCTTGGACAGTCCCTTGGCCAGGCTCAGGATTCCTGCCTTT  
GATGCGCAATAGGCCAGTTCGTCCACGTAGGGCTGCACGGCGTCTTCCGATGCGAA  
CAACACGATCCGGCCCCATTGCTTGCGGCGCATCGCGGGAATGGCCTGGCGGCACA  
TGCGCACTGCGCCCATCAGGTTGATGTCCAGCGTTTCGAGCCAGCCTGCGTCGCTGA  
CCTCCAGGAAGTCGCCGGTTGCACCAGTGACGCCCCGCTGCATTGATGTAGATGTCGG  
GGTACCCAGTTGTTTCGCGCACCTGTGTCCAGATGGCGATGACGTCCTTCTCGCGGG  
TGACATCGCCCTCGATGGCGATGATCTGCCCCAGGCCCGACAACCTCCGCCACTGCCT  
GATCGAGCGTGCCGTTGGGGAGATCGGTGATCGCCACGCGCACGCCGGCTTCCAGC  
AGCTGTCGCGCGGTTTTCTTGCCATTCCCGAGTCGCCGCCACTGATGAGGGCGATC  
CGATTGTTGATTCCGAGATCCATGCTGAACTCCTGGTGGTAGAGAGAGAGGCGGTG  
GGAGGCACGCAACTAGCGGGCGAGAAAACGCTCCGCCGTGCGTTGGCCAAGTGCCA  
TCTGCGTCAGCGCGGGATTGGCTGCCAGTGCACTCGGAAAAATCGAGTTGTGCGAG  
ATGTAGAGGTTGGCGATATCGAATGCGCGGCCGTCCGGGTCCACCACGGCCTGCTC  
GGGATCCCTGCCCATGCGGCAGGTGCCCAGCGTGTGTGCAGAGCGGGCGGCAGCGA  
AAATGCGTTGGGCACCGGCTGCCTCCCAAATTGCGTGCAGCGATGCGCGCGCATGG  
GCATTGATCGCGCGTTCGTTGGACCCGTAGCTGAAGTCGATGCGCGCCTTTCGCTGG  
CCGAATGCATCGCGCTCGTCGGACAGGCTCAGCCGGTTGCCGTCCTGCGGCAGGCAT  
TCGCCATTGATGCCGATGCCTGCCAGGCGGTTGTAGCGCGTCATGGTCGCCACGAGT  
TCCCTCCCCACATGCCCGCGCCACGCGCTAGGGTGTTGGCCAGGGTGATCGGCTGC  
ACGCCCAGGCTCTGCACCAGATAGCCCCGATGAAATCGGCATTGGCCGGGCGCAG  
CATGTCTTCGGTGATCAGCGACGAGGGGTAGCCGCGGTTTCATGCGCATGTCCGCATC

GAAC TTCCCCC ACACCTGGGTGGCCACATGCGCCATGAAATTGCGCCCCACCTGGCC  
GCTGGAGTTGGCCAGCCCAAGGTTGAGCAGCAAGCGCGGTGTCTCCACGCCGCTG  
CGCACAGGAACACGCTTGTGCAACGCTGGCGCAGTTCGCGTCCATCCTGTCGATAGA  
CCACCGCGCTGACCATGCCACGGGCGTCGCGCTCGATATCGATGACCCGGCAACCG  
GGTCGCAATTGGGCACCGTGCGCACGCGCCAGCGGCAGCCAGGTGGTGTGACACT  
CACCTTGGCACCGTTGCTGCAGCCTTGATGACAGGCGCCGCAGTTGTTGCAGGCCGC  
GCGCATGCCGTGGTGC GGCTGCGCATGCGCCCTGGTCACCAATGCGGCAGGCGCAT  
CGGTAGCGGTGATGCCGAGCGTGCGGCAACCGCGCTCCATCGCGTTGGCCGACGCA  
TTGCGCTGCGCCGGCGGATAGGCGTAGCTGCGCTCGGGATCCCAGGGATAGTGCGC  
CGGCCCCGACACGCCGATGAAGTCCTCGACGCGGCGGATATACGACAGCAGCTCTT  
CATGCGCGATTGGCCAATCCATGCCGTGCTGCCCCGGTGTGCGTCGACAGGTT CAGAT  
CGCGCTTGTCCGACGCGGGCAGAAGGCGCCCCAATGCAGGGTCGAGCCACCCAGG  
CCCGAACC GGAATTATTGGCGCCAAATGCGGTGGGCGTCTGCCCCGCCGCTCAGGCG  
CTCTTCCATCCAGTAGATGCCGGTCGTCAGCTCATCGGGTAGATGGGACGCAGGGCT  
GAAGGCCGCACCCGCCTCCAGCACCACCACCGAGAGACCTCGCTGCGCGAGCCGTG  
CAGCTAATGGGGCCGCCGCTGCCCCGCTCCCTACCACCACCACATCGACTGCAGCGT  
TGTGGATGCCAGGGCTCATCGAAGGCCCTTGGCAGGAAGCTGCCAGGCTTCCTGTTG  
ATCGGCTGCAGTCTGTTGATAGCCCGCGCTGTCGATACCGGCACCGCCAACGGCGA  
AGCCGTCTGATCCCATTGCCGCCATCGTAGCGGGAAGGCTGATCCAGATCCGCGCA  
GCTTCGGCGCGGACGTCTTCGAACCAGTGCGCCAGCTGCGCTGCATCCAGCCCGTGC  
GCCGAGGGATCATCACCGGCTGTCGATTGCGACACCTCGCGCAGCCAACGATCCTG  
AGTCTCTGCGGGTAATCCAGCGAAGCCATTGCTCAGCGCGTCGAGCGTGTGAGCCC  
CAGCGGCATCGCAAGCCTATCGGGTGGCAACGCTGCATGGCGCCAACCATCTCCCG  
CGCCTTCGGCAAGCTGGATATCCATCCGTCGGGCAATTTGCGCGCATCGCCGGCTC  
CATCCAATACACGTGCGACGACTGCTGTGAGTAGTTCCAGTTGATGTTGGCTCAGCA  
CGCCTTGCGCAGTCGCGGGCGGGCCCGCATGCCGGCTGAGCAGCAGCTTGCGCATG  
CGCGGGGCAACCCTGTCTGCATTGAGCAACCTGATGAAGTCATCGGGCAGGCACTT  
GTCCACGCTGCGATCTACATGCGCTGCGATCAGCTGGGCCAGGTGTTGCGGTTGTTT  
GTAGGGGATCAGGTGCGCGGCATCGGCCACGACGGCGAGACGCGCATCGTGATAAT  
GCGGCGCGTT CAGCGTTGTTTGCGCGGCTTCGCCGAGGTCGCCATCTTCACTGCCGG  
CGATGATCAACGCCGGCACATGCATGTAGCCGGCTTGCGCGCTGTAGTCCTCACGAC  
TGGCGTGCGCAAGCCAGGCGATCAACGCTTTTGCACTGGTGCGCAGCACATCGTCG  
ACAGCAGCGTTCCTGATCGGCGCTGGCAACGTCACCGCACAGTTATCGTCGATGAAC  
TGCTCGGCCTCTTGCCGGGTGGGATGGCCCTTTTCGAACCAAGCCAACATTGTCTGT  
CGGCGTGACTCATCCATCGGCTCTGGCGCCGGCGGGCAGCCGCGACCAAGGATCAT  
GCCTGCCAGGCCGGCAAGCCCGGCCATGCCATCGCGCGCCTGCGCCGCTGCCAGGG  
TGGCGATCTTTCCGCCCATGCTGTGTCCGATCGCAAACCAGCACGTCGGTTGCCGCC  
GAATGACCTCTTCGACAAACCAGTCAACCAGTGCGGGCTGTGTCGACATGCTGCAGC  
GGCGGCGCGTCTCCGAAGCCTGGAATATCGAGCGCCACACAATCGAAGCGCGCCTC  
CAATCGCTGGATCACACCAGACCATTCTGTTACTGCTGGACCCCAGGGCGTG CAGGA

AAAACAGCGTCGGCTTCGCCATGTAACACCTCTATCCACCAGGCGCGCATGATGACC  
GGCGCGTCGTCCACGCATCGTGCAGATGAGTCCGACAAGGCCAGCGCGTTGTACTC  
GCCCATGTCGTAGTCTCGGCTGCGCAATGGAGGACTTGCCGCACCCCGATAAACATT  
CGAGAGCGCGAGGTGGCTCTACCGAACTTATGACAGCGTGGTGCGCTGGCCGCTAC  
GCAGCCTGGCCCGCACAAAGCGGGACGCAGCGCCCTACCCCTTCAGCACCAGCGACA  
CATCCGGGTATCTGTTCGCACATGAAGTCCACGAAGGCGCGCACCTTGGGTGCAGCC  
AGACGCCTGGAGGTGTGCAACACCCACAGCGCCGGCTCCACGCCGGCGATCGTGCC  
CCACTGCACCAGTTCGCCGCGCGCGAGCTGATTCCATGCAATCGACTGCGGAAGCA  
GCGCCACGCCACCGCCTGCAATCGCCGCGTCGCGGACCATCAGGAAGGAGGAAAAC  
CGCAGCCGTGGAATGGGTTCCAGGACCAGCCGCTCGTCATCGAGCGCCCATGTGGT  
CGGCTGGAAGCTCGACATCACCACAGCGGGAAGTGTGAGCGCGCCGCTGATTG  
GCATGGCGAAGCCGGGCGCAGCCACGACAACAGCCGATCCTTGCGAAGCAGCGC  
CCGACCAGGCTGCTGTCCGGGCTTGGGTAAATCCGGATGGCCACATCGAACTGCTCT  
TCCACCAGATCGACCGTGCGGTCTTCTGCACTCACCTCGAGCATGATCTCCGGATAG  
GCCGCGCAGAAGTCTGCGCCAATCCGTCCCATCGCCAATTGCGAGAACAGCACGGG  
AGACGCCACCCGCAAGCGTCCGCGTGGTGTGAAAGTCCTTCGCGCGCGGGCGGCCA  
TGGCCTCGGCCACCTCGCTCAACGGCACTTCGGTGCGGTCCATCAGCAACTGCCCCG  
CTTCGGTGAGCCTGAGCCACGGGCGCTGCGCTCGACCAGTCGCACCCCCAGCTGCT  
CCTCCAGATCGGCAATGCGCCGCGACAAGGTCGCCTTCGACCTGCCGCTGGCACGG  
CTCGCCTTTCCAGGCCCTGGTTCGCTGCGACCAGCGCGAAATCGATCAATGCATTG  
AGATCCATGGTGTTCAGATTTGAAACCAGGCGTCCACATCTTGGCGTCTTCGTATT  
GACGATGCAACGGCCTATCGTCTGGTCACCGCAACGTCAGTTGTGGCAGCGATGTGC  
CACTGACGCCTCTTCCATCCACAGCAGGAGATTACATGAGCATTCTCGTGACCGGT  
GCCACCGGCACCATCGGTTCTCTCATCACCCAGGGCCTTGCCGATGCAGGCGCAGCG  
GTGAAGGCATTGGTTCGCCAACCAGGCAAGCGCGTTTTCCCGGCGGGTGTGACTGA  
AGTTGTCGCAGACCTCACCGATGTTGCATCGATGCGTGCCGCGTTGTGTCGGCGCA  
CACGCTGTTCCCTGTTGAATGCGGTCACTCCCGATGAAGTGACGCAGGCGCTGATCGC  
ACTGAATCTGGCCAAGGAGGCAGGCATCGAGCGCATCGTGTACCTGTGCGGTGATCC  
ATGCCGATAAGTTCACCAACGTGCCCCACTTCACCGGCAAGCAAACGGTGGAGCGC  
ATGATCGAAAGCCTGGATATTCCTGCAACGATTCTGCGTCCTGCGTACTTCATGCAG  
AACGAAGCGATGATCCAGCAGACGATTCAGGACTACGGTGTCTACCCGATGCCGAT  
CGGCTCTGCGGGTGTGGCCATGATCGATGCGCGCGATATCGCAGACATCGCGGTTGT  
CGAGCTGCTGCGACGCGACCGTGACCTGCCGCGCTCGCACGTGTCACGCTCGAACT  
GGTTGGCCCACATGCCGTACGGGCAGCTCCGTTGCGAAGGTCTGGAGTTCGGCGCT  
TGGGCGCGAGATCGCCTACGCGGGCGACGACGTGGCCGCGTTTGAAGCGCAGATGG  
CGGCCTACGGCCCATCCTGGCTGGCCTACGACATGCGCCTGATGATGGCCGGTATCC  
AGACATTTCGGCATGCAGGCAGCCGACGGCACGGTAGAAAACTGCAGGCCATGCTG  
GGGCGCCCGCTGCGCACCTATGAAGACTTCGTGCGCGAGGCGACGGCGCGGGCTTG  
ATCGCATGCGACGCAACAAGCGTGGGAAACCCCGCTTGTTGCGTACAAGCATCTGC  
TAAAAGCGAACGGATCAGTGGCATCAGCAGTCTCACGCACATAATCACTGCGCTGC

CAGTCGGTTTTTTTCCCGACGTACGTGAACGAAAATGCAAGATAAAATGCAGCCTGGA  
GCGCGCGGTTCAAGTTCCCGATTTTCGCGTCGTTATCACGTTGCCGAGGCACTCACG  
CGCACATCACGCGGCCTGCTAGCCGGTGCCACTTACTGGACATCAGGACGATTTCGCA  
TGACTGCCTATTTGCAACGCTATAACGTCCGGTCGCCGTCTCGGCGTCGCCTTTGGAA  
TTTTGATTCTCCTGTCGAGCCTGCTGGTGGCGACCGGCTTGATCACCATGGCCAACG  
CACGACAACAGTTCGATTTTCATCGTGCTCGATCGCATGGCCAAGATCCAGATCGGCA  
ATGGCATGCTGGATGCCAATTCATCGATCCTGATCGCGCTGGGCACGTACGCCATGG  
CCACCAGCGACGAACTCAACAGCGAAGCGGTTGCGACCATCAAGGCGCAGCGCCAG  
CGCTACAGCGAGCTGCGTGCCAAGCTGGACACGTTGCCCAGTTCCGAGGAAGGTCG  
CAAGATTTCGCGCCGAGATGGATGCGCGCCGCGTAATCTCGGGAAAAATCAACGATC  
AGGTCATGGAGCTCGCTGCTCAAAACGACAATACGCCGGCGCAAGCGCTGCTCAGC  
GAAAAGGCGCGCCCGGCGACGATTGCATGGCAGGACAAAATCCGCGAGCTGGTGAC  
GCGTCAGGAAGGTCAGAGCCAGCAAGCCTATGCCGATGCAGTGGCGTCGATGAATC  
GCGGCAAGCTATTGATCATCTCCGGTGGCGTTGCCGTGGTGGTGCATCAGCAGCCTGC  
TTGCCTGGCTCATCACCCGCAGCCTGACCCAGCCGCTCGCACGTGCAACGCAGGCTG  
CAGAGGCCATTGCCAACGGGCAGCTGGACAACAACGTGGAAAGCGATGCCAAGGA  
TGAAACCGGCCGCCTGCTGCGTGCCATGCGTGGCATGCAGACGCAGCTGCAATCCTT  
GCTCACTGCACAGAGCGACATGGCCAAGCGCCACGATGATGGCCAGGTCAGTTTCC  
GTATCGACGCCACGGCGTTTCCTGGCGACTACGGCCGCATGGCCAAGGACACCAAT  
ACGCTGGTGGCCTCGCATCTTGCCGTGCAGACAAATCTGGCGCGCATCATGGGCCGC  
TACGCCATCGGCGACCTCAGCGAAAGCATGGACCGCCTGCCCGGCGAGAAGGCGGT  
GCTGACGCAGACCATGGACGAGGTGAAGGCCAACCTGTCTGCAATGAATCACGAGA  
TCAAACAGCTGGCGCAATCTGCGGCCAACGGCGACTTACCCGCACGCGGCGATGCC  
GACCGCTTCCAATACGATTTCCATGTGATGGTCGATAGCCTCAACCAGCTTATGGCC  
ACGGCCGATGGCAACCTGCAATCGCTGTCGTCGCTGCTGCAATC

>CONTIG\_16\_length\_13678\_cov\_228.887536

TTTCGTAGCAGCAGTTTCAACGTGCGCTCTGTGGACTTCCTTTTCTTTGTTTCTCTCTT  
CCTTCTTCTCTTTTGTTCAGATGATCCTCGATCTCCTTGGCCAGAGGGCGCGACGGG  
GTGCCCATAGGGAGCTGGGCGGGATAGCGTGTGTTGCTCTTAAGGCCGCTCTTTCGT  
CCGTTTTCGTGAGCGCGGCGAGGATACTCTTGCAGGTTGATAGCTGCTTCCCGG  
CCTTGGATGATGGCGCGGTTCGATGCGGAACCGGCCGATGTGGATGCCTTCCAGATGC  
AGGAGGCCGAAGGGCGAAGCGATGTAATCGTTGAGTGCTGCGGAGGGTAAAGCGGT  
CATGGGTCACTTCCATCGAAAGATGGAAGTAGGGATATGACAGGACGAAAATTCGT  
CAACGGGGGGCGATACAAAAATTTGCGGCGGCGGCGCAGTCCTTAGGTGTTGGGATA  
TTCCCAATGGGGTGCTTCCCGGGTCCGCCGATCCGTTATCCGGCGAGAAGCCTTGTA  
AACCAAGGGTTTTAAGAGGATTTGTGTCGATTTATCGCAGTCAATTGCGTACTGTTT  
GCAGTAAATAAGCTAACTAGATGAGTTTGATATTTCGATTTTAAAGATGAATTTAAGT  
TAAATGTTAGCCTATTATTGTTAGGGTTATTTATATTCAAAGCAGCGATCTGCTTGGT  
TCGGAACCTTCTGACATCCAATAGGGCGCGACACCGATGGTGCGACGAATGCCAGG  
AGCGCAATCTGACCTTGCCGGACGTGGGATCCAATGGTCGCTCACCTACGGGGCG

CTTGAGCAGCGCCATCTCGGCACCTGAAGGGGCTAGCTGTCTTGCGTTTCGCCGCGGC  
GTCTCAAGCAGTGCGACCGCACTGCCGATACTCAGGCCCATGGACAGAGCCGAGCT  
TCGCCGTACCTCGAACGCCTGGATGCTGCGGTGCCCGCCTTGCGGGCCTCAAGTCC  
TGATCGCCGTCATTTTTGGCAAGCCTTTGCCAATATGGCTGCTGCCATCGAGAGCAA  
GGCGATGACGAGCGAGGACGCGCAGTTCGTCGGCCGTGCGGCCGAGGAAATCTTGT  
CGTGGCACGGACTGGGAAACATAGACGAACACGCCTGAGCCCGTTGGGGTCGACCA  
GCCCATCCCGATGCCTGCGTGCTTCTCCTGCGCAGCGATGCGTGCGTAAGGCAGGCA  
CAGGTCCGCGAGAAGCCCCACTGGCTGCAAAGCCCAGTCATCGCCTGCTGACAACAA  
TCGACCCCGCCCATCCGAATACCGTTTAGCTCGCAGGCCCTGTAGGGCATGCATGGT  
GTTTTCTCCACCAGCGCTGGGCCTCTGAAAGGGACCCTAGCTTCACTGTCCCGACCG  
CAAGGACACGCCTCCTCCTCGTCGCTGGCGCTTTGTTGCGGCCCTTCGCTATGCGCC  
GCTGCTGCGGTGCTCGCTCTCGGGTGCGGTAGGGCCGGACGCTTCGCCTGCCGGTTC  
CCACGAGGCGCACAAACGCGCTGGTGGAGACAAAACGATGAAGCGCACCCAAGACC  
TGAAGGCCCAATACCAACTCCAGATGGACGAGGAGGGCATCTTGCTCGCCGCCGCG  
ACCATCTGGAACAGCGCCTTCAACGCCAAGGCCGCATCCGCAGCCCGGAGCAGGC  
CGGCAGCTACCTGGTCGCCCCGTTGCGCTCACCTGCCGCACGAGGTTTTCGGCGCCGT  
ATTCTCGACAACAAGCACCATCCTCGCGACCGAGCACCTATTCTCCGGCACCGT  
CGATGCCTGCGACGTTTCATCTCCGGGTGCTCGCCAAGCGCGCGCTGGAGCTCAACGC  
GGTCGCGCTCATCATTTTTCCATAACCACCCTTCGGGCAATCCGGAGCCCAGCGAAGC  
GGACCGCAAGGTCACCGAGCGCCTGCAGCAAGCGCTGGGCCTCTTGGACATCCGGG  
TCCTCGACCACCTGGTCATCGGTGGCCAGAAGAGCGTCAGCTTGGCCAGCAGGGGG  
TGGGCATAGCCCCGCCCTTCACCTGTGCCGCCTGCCGAAGCTAGACTGCTAAGGCAG  
ATCCACATCCATGGAGCAGGAATGAAGGCGTTCCGCGTGCGAGGAATTGTCTGGGA  
GACCGATGGCAAGCGTCCTAAATTGCCCACTGAAGCCACGGTCGAATGCGCGAGCG  
AAGAAGACATCGCCGATGCGCTTAGCGATGCTTACGGATGGCTGGTGAGGGACTTC  
GCTGTCGTAGACGGTGCTGATGGTGCCAGTGATCCGATAGCGTGATTCCATTCTGGG  
ACGCGCGCGGCACCTGACGGTTAGACTCTGGTGGCAACGAAGCACATCGAGCACTC  
ACGGAGGCTCAGCTTGCGGTTACTGATTGCGCAGCATTGTCGTGCTTACCCTTTCGTTA  
GGGACGCTGGCCTGTGCTCAAGGGGCCGGCGAGTAGCCAAGGCACTCAGGAGAAAAC  
AATGGAAGGACATCCCCCAGCGCTGCAGACGTGCGCTCCGAGCAAGACAAAGCCG  
CTGCTAGTGCCGACAGGGCTGCAGACGAGGCCACCCGGCGAGCCGCTCCCAATGCT  
GTGGTGTCTGGCGATTACCCACCATTGCCGCAAGGCCCGGCGCTAACGTCAGGTGCA  
TTGGTCGAGGCCATCGTTTCGAATGGCCAAATCTTTGAAACCAGAGCAGACATGGCC  
CCGGCTCACGTTGCGCACGTGTCAGGGCTTGAGGTGACGCCAGACAGTCAAGGGCG  
GCGCACAGGGCTCCAGGGCGCACTTGGTGCGGGGCACTATGAGTTCGCTGTGTGGA  
AGCCTTACGCGCGTCATCCTGGGCACACCATCGAGCTGACCGTGCGGCCGTCCGAG  
GCCTGCGACCTGTGTTTTAAATCACTGCATGACCCATTGGTTGCAGCCGGGTTCGGT  
GTGACCAAGAACGCGGTGGGCTTCAAACCGACTGTCTACTTTGAGCGAGCACTCGC  
AGACGGGCTTGGCTTGTATGTTGTCGTCAGCACGGACAAGCACGAGGACCCACGCT  
GCGTTTCGCGGGTCAGGCTCGAAATGGAGCCGCGTGATGGCTGATCAGCGCGACAT

TGACCGGTTGCTCCAGGACCTGGAGCGGCAGCCGGGCCTCCCCAAAGGTGCGGTGC  
GTGACCTCCGTGAAGCCATAGATACTTCGCCTTACCTTGCTTCGGTCATGACCCAAG  
CCATCGATCTGGGCACCCTCCGTGCGCTGGAAGTGTCCAACCAGCCGAATGAGGGC  
GGGCACTACGATGACAGGACGGGCACCGTCAGCATCAACACCTCGATTTTCGCGCC  
GTCCATTTCGGTTCGACCGCTTAGACATGTTGGCGGGAACGTTGGGGCACGAGACTGG  
GCATGCGCTGATGGCGCCGTCGGCGCAGGTTTCCTTGAACACCTTTGTGTTCAAGCT  
CGATACCGCTCTAAAAGACGGCGTCCAATACGGTGAATCGGTGGTTGATGTGACAG  
CGCCATCCAAGGAATACATCGCGTCCGCGAGGCAGAACGAAGCCTTGGCCGAGTTG  
GTGAGCATGAATTCCGTGGCCAGTCGAGTGACGACGACTACGGGAGAGTTCAACCA  
GGCCGAGTTTCTGCGTCGCGTTGAGCCGACAACCGCTTGCGTGAAAGACGGAAAGC  
TTGAGCCAGGCATCCATTTGGACGAGCGCGGACTTCAGCGGACGGGAAACAGCATT  
TCCAGCCCGGCTGTGGAGGCCGTTGCCGTTTGTCACTTCGATAGAAGCGACAGCAGC  
ATGGGGCGCCAAGGCGCGGCTAACTACCCCGGCTACTACGCGGCTTACCCTGTGAG  
CGCAGGGGCTGCGTTGCTGAAAGATCGCGCAGGCTCGACGACCCAGGCCTTGCCGC  
GGCTGGGTTACAACCTCGCAGAGCTCGGCACCGATAACAGCGAAGCTTGAGGGAGCC  
GGGCTGAACTTGGGCGGGCAGGGCAAGGCGTTCGGATTTGTTCGATACCTCCCACGG  
TCAGCAGCGGGAGGTGGAAGTGCGCCAACTGGGCCCAGCCCAGCATCGCCCGGACA  
TTGAGCCCCCTCGCTTCGATCGCCTTCGCAGGTGCTGGCCGACAATCCCCTCACC  
CCGACCATCAGACCTATGCCCGCATCCACGACTGGGTCAAAGGCACGGGCAACTGG  
AACGAAGAAGAGACCAGGAATGTCGCAGCTGCGCTTTACAAGCAGCAGGTGGACGA  
CGCGTTGCTCAAGCGAGTAGACAGGGTCACGGGAGGATTAGGGAACGATGGCGCTC  
AGAACGTCGTTGCGATCTATGCCCCGCACGGGGTGGACAAAGCGCCGCAGTTCCAT  
GCCACGTCGACGGGCGCGAGGCCTCGCAGGAGCCGGCCCAGCAGAACCTTCAGCA  
GGCAGAAACCATCAAGCAGGGCCAGGTGCGTCAGCAGCAGCAGCAGGAGCAGCAG  
CAGGAGCAGCAGCAGGAGCAGCAGCAGGAGCAGACCCAGCAGCAGTCAGCGCAGC  
AGGGGCCGAGGATAGCTCTTTGAACAATCAAAAGGATCCGTGAAATGCCGATTAGC  
CATTCGGGAAGATTCTGAACCAGGACCTGATCTCAACTGGTCGATAAGTCTAACATTA  
AGTGAATACAATAAGCTCTCTGACTTTACCTCAAACATCGCTACGTTTTATTTCTTG  
ACCTATGTGTTGTTAATATTGCAAAGCTAAAAAATGTTTCTATAACAAAAGACCGAA  
GAAAAGTCGGTTGGTTGAAAAGGCTTCGAGACTTGGATAGGCCTCAGCATTCTTTCT  
CATATTTATTGGCGCTAATGGAGCGAGTTAGCAATTCGCGCGATGAGCTTTCCGACG  
AAAATTTGGAGCGGGAAATTCTAAGCGACATGGATTATCTCAGGAGATTTTTTAAAA  
AAGCACGTGTCGTTGAGCCGAATAGCTATGTGGTTAATTATCTCAGGAAACTTCGAA  
GAGCGCCAGTTGAGTTGGATCGTGATAGGTATTTGAAATTCCTGAATTCAATGAATG  
GTGATTTTAGGTTGATGAATTCAGTTGGGCGGGAAGTAAGGTTTGAGAAGGCGGCT  
GAAATAATGAGCGAGGCGGACTCTTGTGGAGTAAGTCGGCAGCACCCAGTTGTATT  
AATTGCGTTGGCTTGCCTTTATGGGAATCTAGATGCAAAGGGTTTGATGAAGTTCAA  
GTTGGAGCCGGCCCAATATAATGCGGAAAACGTTCTTTCCGATATCGTGGCAATCCA  
AAGGTTTGCAGAAATTTAAAATAGAGGTCTGTTCGAGATATACCTCAGGCCGGAAAAT  
GCTTACTTTCAGATTTTTTAAACGGACGACAAAAGGTCTTTCTGGTATTTATAAGTTGTT

CAAGGCTAAGTCTCTAAAGGTTGAAGATAATGATGATACCTCTCAAATTGAATTTAG  
CTTTGAGGTTAATATGGGTGCTCTCTTGAGTGAGGCTGATTTTGACGAGATTAACAA  
CGTGATTTCCGAAATCAGCCGTCAATCCATGAATTTAGCTTAACTGTCGGAACGGTG  
GTTTTACAGGCTAGCGTCCTGTGGGCCAATCATTGACAAATTCTCCGGTGCGAAGAA  
AAATGAAGATGATTCGTCAGTGGCAGTTCACTATCCTCGGCTAGGGAAGGAAGCCG  
TTAGTTCGAGATGATGGAGCCAGCACTAAAGAGTGAGGATGAATTGGCTGATCCAG  
TCGAGACTCATGATGGCATTCTTGGTAGGTCTTTGGTGTATAAAGAAGGATTCACC  
ATGTCAGACCGGAGATTTAGATGATTGTCCCAGTGTATAAAGAGGTTCCCCATCTTA  
AAGCAATCGATGGAAGCCCTGTATCAGGGCACACCCCTTATATCTCATTGATGAAT  
ATCTGCCCATCCCAGGGATCGAGGATGCCGATATTCGCTTTGAATTTTCTAGTAAAC  
CTTCTTTGGCCGAGGTGGAAGATCTTGTGCGTCGTCTTAATGACGCAGGGGCTCGTCT  
TTGTAGTGCAGCGCCGGTAACGCTCCATAAGCGGCTGTTTAATAGAGGGGGTGGTG  
TCGCTTTCTCCTTTAAGATGTAAGCGGTTCCCTGGTTCCTGGCGCTGTATGCAATGCCG  
TCGACGCATTTAAGGTGTTCTGTGCGACGCTTACCACTTGTTTCTAGAGCAAGATCC  
AAGCAGCATTACGCTGCTTGGTTTGCGCTAGTGATTGAGGATAAGGAACCTACCCAT  
CATCTCCTCAAGTTTGGCGAGATCTTTGTGGAGCTGTTTGCGAATCCTGGAGGCGTT  
GGCAATAGCTGCTCGACGTTCTCCTGCTCTACGTCACCTAAGGGGGTGTTGAGATTG  
GTGGATGCTTGTTGGCTTCCCACAGATCCACCAATGGCGTATAGACGTTGTTCCA  
AACGAAATCATAAATGGGCTTGCCAAAAAGCCATCTCAACTCTTTGATGTTGTCAA  
AACTTTTGCTCGGGCTCTTCGCGCCAGTCAGCAGTGGTGGCGTAATGGGCGCTCTC  
ACGAAGAGCGTCGTATACCTTAAGCCATCTATCAAAGAGGTCGTATTTGAGCGTGTT  
TCTTGCACTCTCGGCCTGCTGCTGTGCACTGCGCCACTGTCGATATGCGATGTAGCC  
AACCGCGCAAGCAACGGCTATTTGCCAGCCCCGGTTAGTAGTTTGATAAGCAAAC  
CGGCAATCTTAAAGTGCATATCCACTACCATTCTGCACTCCCAGTGTTGGCAGGTTC  
TGCGAATCTTGATAGCTTTTGTTTGGTTCGGGCAGGCCAGTGTCCTCAATTAAGGAGC  
TATCTGATGGACTACCATAGTGTTGATTTTAGCCAAACCCCGGTCGAGCAGGTGATG  
CGTGATGCGGCGACAGAGCTTTATCAGGCAGCACATCAAGCTAGAGGCCTAGCCAA  
TATGAAGCTTCAAAATCCTCCCGCAACATGAGTGGTGAAGGTTTTGAAAACCAAGT  
GGCGGAGGCGTGTGGGATGAGCTACTAAGTCACCGAGAAGCCTATAGCCTTCTCTT  
TGCTTGTCGTCGTGAGTTGTGCGCCAACGCCCCGGGGCAAAGTCAATCATAGAGA  
TTTACCAGGTGGTCCAACAAGAGTGGGGAAGCTTGTGAGGCCATTGCCACGATTCA  
GCTCTCATACTCAAAAGTGCAAGACGCGGCCATGTTTTTACCTAACAGCGAGGGGG  
AGCAGCGGAGGGCTTATCTAGAGCTCGTTGCGGACCCAAGGCACGTCATTGAACAA  
GAGATGGTCAATGCCTTGCAAGTGCTGAAGAGCAGTCCATAGCGTAGCCAAAAAAT  
CATTGATTTAACGTCATTGCGCTTTATCAAAGCTGACGATAGTGTCGGAGTTTATCT  
GGTAGGCAGAGTGCTCAGACTTGATCTTAGCTTTTTTACTTTAGCTAACAATGGATTT  
TTGTATTGGCTTCTCAGTGAAGTGGTATTGACATTTAACCGCAGCATGTTAGTCATGG  
CTTGACCCAACTTTCTATAGGTTTCGAGTGTGACAAGTGAAGAAGAAGACGCGTTTAC  
GTTTGAGCTGGCTCAGCTGATGGCTGAGTTGGAGAAGAAGTATGAGAATCGAGATG  
GTGAAGATTGGTTTGTAGACGACTGGCATCCGCGATACGTAAACTTTATTGTCCGCG

AAAAAAGAGCCAGGTTGGGGCTACCTCCGCTTAATTATTAGCCTCATTTATAGCCAG  
GAGTCGATGGCTTCGCTCTCAGGTAGTCCGCGATATCTAGAGTGGGCGCTGACATTC  
GGTCTTTTTCTGGCGCGGCTTGTTGCACTGGCATAGGTGGTTTACCTCGATGCACAG  
ACTGTGGGTCCTTCTTGAGTTCGTCTATACGCTTAGAGAGTGCGCTGAGAAAATCGG  
TGATGTCATTAGTGTTCCGAGGCGTATGTATGAAGCCCTTGTCTGAGAGGATGATTG  
CGTTAATCTCCTCTGCTTTCTGGCACAAGATTTGTAAATAGTCATTGAAATCTGGCGC  
ACGAAGGCCGATCGGAATCCATGCTCTGTTCCAGGCTTATTCGATTTTATCGCTATC  
CCAAGGCGCTGAGAGTATATGGCTGAAAGAAAGCCGAAGTCACATTCTGTGTAGGT  
TACGAAATCATCTATGGGGGCGTGGTCAGAGAGAGAGAAGGAAAACAGATTATTGA  
CTCTCCGATTTCTTTTTGTAGCTAGAAGAGAGTCCTCAATTTCTTTGGAGTTTGCATA  
ACCTTTTAGTGTGGCGCTTAAATATGGCTGAATGGCTAATGTCCCATCCGTCTCGTTC  
CAAAAAACGAAGTGGTGGCCAAGCAGAGATCGGAGAACGTTCCCCGAGGCCGTGGT  
TAGATTTTTATCCCCGTCAAGTTTACTTGCCATTTACATACGCGCTGGCAAATGCTCTT  
TTCTTGAAGCGCTTCTTTCCAGTAATCTCTTCGACTGCCCCACTCAGACTTGAAATTTT  
TTGATGTTGGCTTGACTTCAATTATGAAAAATCTATCCTCGGCTGTAATGAGACAAT  
CTCCCAGCCTTGACTCAGCATTCCCAGACAGGTTTACAGTCGGCATCGGAATCGAAT  
TTTTTCGCATTAACCATTCGAGATCCCGTATGGCGAGCACTACTGAGATTTCCCAA  
GCTCTGCCATTGATTACCTTCCTCATTAGTATGTGATCCTGCAACGTTAGTCCATGTT  
TGCCGGCAGATACAATCTATTTAGCCTTCCAAAGATCCAAAATCTGACACGTTCCA  
ATACGCCTCGGTCATCACTCGGGCATTGCGTTGGGGGCCTACAAGGTCTGGGCTTC  
CACTACAGAACCACTAGCTCAACGCGACACAGGCAACCAGCACGTCTTGAAGGGCC  
GAAGGTTAGCTTGAATCTCAGGCCGTGAGAGCCCTTTGCCCCGATCCTTAGAAGCCGT  
CACGCCCCGGCCGCTGGCGTTTGGACCGCTGGGTGCTAATCTTCTCCGTGCAGGGGTC  
AGGTCGTGCTGACGCCTTGTTTCACATTGCCGCGTTTAGCTATCTATATGAATCTACA  
GACCTTTTCATCCATTTTCGAACGCGGCTCAGCCCTTGCTTCAGCGTTACTACGCCTGC  
AGAGCTATGGCTCGTGGTTTCGCTGAGTCGAAGAAGACTGATAAGACGCGGCTTTCT  
CACGGGCGGGCCTTCTGTGCTGCGGTTATCGAGGCCTATTGGGCAGAGCTGGCGTCT  
CGCCACAAGACGGCCATCAAGCCCAAGAACTGCCCCGATTGCACTGCCTAAATTGCC  
GCTGGACGTGGAGCAGGTGGCTGAATCCATTGGCCGTCTGATCGTCGAGTTTCCGGT  
CGAGGACGCTGGCTACCTGATTGGGTCCATCTACACTGTGACGCTGCCTCCCGCGCT  
GAGATCGGAGATGGGAGCCTTCTACACGCCTCCACCCCTTGTTGCGCGGCTCTTGGA  
TCTGGCTGAAGAAGCAGGGTTTGACTTCGCGCAAGGGCGGGTGATTGATCCCGCTTG  
CGGCGGAGGTGCGTTCTTGGCACCCGTGGCGCTCCGCATGATCGCCCGCTCCGGTGG  
TGCGTCTGCAGACTGGCTCATTAAGCCTAGGCAAACGTCTTAAAGGAGTCGAGA  
TAGACCCATTTGCTGCCTGGATGACTCGTGTGCTTCTTGAGGCCGCTGTCATGCCGCT  
GTGCGTGTCCGCCAAGCGCAGGCTTGCGGACGTAGTGCTTGAGGCAGATGCCTTGCA  
GCCGCGGACCTTGATCATTTGATCTCGTCATTGGCAATCCGCCGTATGGACGATT  
GAAGCTCTCGGACGAGATGCGTCAGCACTATGCTCGCTCCCTTTACGGGCACGCAAA  
CCTCTATGGTTTGTGTTACGGATTTGGCCTTGAAGTTGGTGAAGTCAGGAGGGGTGAT  
CGCATATCTGACGCCCCACTTCGTTCTTGGGCGGGCAGTATTTTAAGGCGCTTCGTGG

CCTCATGACTCAGGAGGCGCGGCCCGTCGCGTTCGACTTTGTTGCGGATAGAGATGG  
TGTGTTTGACGACGTTTTGCAGGAAACGTTGCTCACAACGTATAGCCGAACGGAGGT  
TTCAGGCCCCGTATCTGTTTCACTGCTCATTCCACAAGGCCTCAATGCTGCCAAAGT  
CGAACTACTTGGCAAGGTAGAACTTTGCTCTTCAGGTGCTCCGTGGATCTTGCCAAG  
AAATGCCCAAGACGCGTCTCTCTTGGCGGCTATGGCAGAAATGCCGACCCGTCTCAA  
GGATCTTGGCTACACCGTGGCTACAGGTCCTCTGGTGTGGAACCGGCACAAGGATCA  
GTTGCGCCCCCGAGCAGGGAAGGGGGCTTATCCGTTGATTTGGGCTGAGTCGGTGAC  
CAGTCAGGGCTTTAGCTTCAGTGCAGAGCGTCGAAACACGTGCCTTTCATTGAGGT  
AGATCCCGAACAACGCCACCTTGTGACCGCAAGGCCTTGCGTTCTGCTCCAGCGAAC  
GACCTCGAAGGAGCAAGATCGCCGTCTGTTGGCGGCTGTCCTGCCCCAGGAGTTTTT  
GAGCCGCTCCCAAGGTGTGGTGATTGAAAATCATCTCAACGTCGTCCAACGTTCCGA  
TGACTCAGATGCGTCGATTTGCGCGGCCACCATCGCAGCTTTGTTGAACAACGGGGT  
AGTGGATCGCGCGTTCCGCTGCATCAGTGGAAGCGTCGCGGTGTCCGCTTACGAGCT  
CAATGCCGTTCCTTTGCCTTGCTGACAGATATGCGACGTATCGAATTACTCGTGAG  
CAACGGTGCCAGCATAGCGTCGATTGATAAGGAAATTTCTAAATTTTATGGGGTTTG  
ATGAAGTGATGCTGCCTGAAGTCCCCTCGTTGGATCTGATTTCGAGAACGATTGCCGC  
TCGTTTTTCCAGATGGCATAGAGCATCGAAACTACGCTATTCGGGAAGCTGCGGAAC  
GGGTCGTCTACACCATGTTCTATGTCGGAGCTTTGGAAGGATCGAATGTGTGGCTGA  
GGCCAAGCCAGGTTACTGACATGTCGGTTACGCAGGCAGAATTGCTGGATGACGAA  
AGCCGGGTTGAGTGGACCAAAAGATCGCTGTCCAGCCAGAAGGAGCGAGATCCGCG  
GTCCTGGTATGCCAACAACCTCTCGTGAGCAGATTGCGGATGAGACCATTCGTGCAGC  
ATTCGTTCCCATGGGAGCTGTGGTCGAGCGTGCCGGACTAGCTTCCACGTCTCCGAA  
GCCCCGATATGCGCTTGCCGCTGACTTTGCGGAGCTCTTCGACGCAGATTTGCAGAC  
CGATGAGCTCACAGAAAAAATTAAGGCTTGGCAGGCCAAGCATTGTGCGAAGGCGG  
CTCTCGCACGAGTTCATCTGGTGAGGCACGGCGTCGCGGCTGCCGCAGATGCGGTGT  
CAGTCACCTTCCCAGGTCAGAAGGAGGTCAGGTCACTTAAACCTGGTCCTTCAAGCA  
TCATTGCCAAAGCTGTCATTGAGGTCTTTGCCCCCAAGTTCCTGAAACAGCCAGCGG  
TGCTGTGGATCAGTGAATCGGGCAACAAGGTGGTGGCTCGAGACGATGCGTTGATG  
AAAGCACTCGGGCTAAAAATCGATCCATCAAAAATGCTTCCCGATATCATTTTGGTG  
GACTTGATCCTGGTTCATCGACCTCGATTGACCTGCTTGTGGTTTTTGTGAGGTGC  
TCGCAACCGATGGTCCCATTACCCATGATCGAAAGGTGTCTCTAATGTCTTTGGCCC  
TAGAAGCTGGTTTTAGGAAGGGCGTTTCCGAGCTTGCTTGGGGCTCTTATGCTTGGT  
GTGCTTCAGAGCCAAACCACCTGATAGAGTTCCGCGACGGTGAGCCATGGAAACTTT  
CTGACAGGGAGGGGTGAATCGAATGCAGGGTGTTAAGGTATTAACGTGGGTCGATG  
TGACTGAAGACCAGGAACTTAAAGCCAAGCTTATCCGTCAAGAGCGAGATCGTCTTT  
ATGCGAATCTCTATCGCGAGGAAGCTAGTGACGAACGATGGGTCGGTGACTTGGGG  
GAAATCATCTTTGACGCCTGGAGTCGCGATCTTGTTGGGGAGAGGCTAGCGTGATT  
CGAGAAGACGCAGCGGGCAAGGCGGATTTCAATTCAGTGCGCGCATTAGCATCGG  
CGTGAAGACCGTTAAGAGGAAGGTGCCGCCAGAGTTAACTACACCGCTCAGATCA

GCGCCAAGCACGCGGATGAGCCCGTCGATCAATTCTTTTTCATGAGCTACGAGATTG  
CCGCACGAAAGATGTGGCTGTTGGGAGGGATTGATCGGGCGCAGTTCTTGAAAGAG  
GCACGCTACTTCCAGGCTGGGGAGGCTGTGCATCAAACTACGTCATTCGACCAGGT  
CACGAGATATACAACATCGAGATTGGAATCCTTGTGACCTCAGTCATGGTTGAGA  
TCTGTCGCTTAGGCATTGACCTTCATGGAAGAACGGCAGTCTGAATCTACTGCCGTT  
CTTCGACGGTGCTAAAGACGGCGAGTTGAAGTCGGGATGGGATCGCTTCCCGCGGT  
CTCTTCCATCAGTCTCTTCTTTTGCTGTTGGATGCGTCAATTGCTTTCGCTTCGTCGC  
TTACTTCCTTGCAGTCGTTAGCCAGTTGATCAAGGACGTCAGTGGTCATTTCTTTGCT  
GCCGTCGGCTTTGGTCTCAATCTTGTCCACCGGATTGCGGCGGTTGTTGGGACCCAG  
CAGCGTCTCGGCAGCCTTGCGAATTGAGTCGAGACCAGGGAGCTTTCCTGTGTCGTG  
ATTTGATGCAGCCTCGGTGGCTCGATCAAGGGTTTCGATGCTCTCCTGACGCGTCTTC  
TTCACCTCTTCGTTTTTCGTCATCCATTCTTATCCGTCCATGATGCTGTGATTGGAGAG  
GCTGAATCTAACTGAGATTCTGCGCAATGGCACCAAGCCCGTGCCAGTGGTGAA  
GCAAGAGCGCACCTAGGTGTCACTGCGTGACACATGCGCAAAGGGCTCCGCCCCCTT  
GAACCCCAAGCGCCGAGGGCGCTTGCGAAAATCCAAAGCCGAGGCATAAACCAAG  
CAACCCCACTGTTTTCGGAGTCGCCGCCTCATGGCCATCTACCACGCCAACGTCAAAA  
CCTTCAGTCGCGCCAAAGGACATTCGTCCATCGCTGCGGCGGCCTACCGCGCCGGCC  
TGCTGCTCGAGGACGCGCTCACCGGCCTGCGCCACGACTACCGCCGTCGCGACGGC  
GTGGTCGAAACGCGCTGCATCGCCCCCGAGGACGCGCCTGACTGGGCCCTGGTCCC  
CGCCAGCTCTGGCCGGCGGCGGAGGCGGCAGAGCGTCGCAAAGATTCGACGGTTCG  
CGCGCGAGTTCGAGTTCGCGTTGCCGCACGAACTCGATGACCTCCAGCGGTCCGACC  
TGGCCGTGGAAGTCACCCGTGCGCTCGTCGGTCGCTACGGGTTCGCGGCCCAAGCCA  
GCATCCACAGCCCAGGCAGCAAGGACGGCCTGAACTGGCACGTCCACGTCTTGCGC  
ACGACCCGGCGCATGGGTCCGTACGGTCTCACGGACAAAACCAAGGAACTGGATGG  
CGGGCCCTCGGGACGTGTGCAAGTGCAATGGGTGCGCGAACTCATCGCCTCCACCA  
TCAACGCCCATCTTGAGAAGGCCGCGCTTGAGCTTCGCGTGGACCATCGCAGCCTAG  
CCGCTCAGGCCGACGATGCTTTGGCGCGCGGCGACCTGGCCGCGGCTGCCATCCTGT  
C

>CONTIG\_17\_length\_13471\_cov\_4.770758

TTGGTCATGCTGACATTGCCGCGCTGCGCCGGCAGGCAGTGTTCGATCAGAGAAAAT  
TGTGCTGGCGTGATCTCCATGCTCAATAGTTTAATCGCTCGGGCCATTAGTGTTAAC  
AGGCCCTAGTTGGCTGAAATTGCTGCTCTAGGCCCTCCCACTGCGATTACGAATCA  
CATCAGCCTTCACTGCCGGCGCGAGTGACGCCCATACGGCATATACGACGGTATCG  
AGCGGCTCGTTCCGCGCCCCCTTCGGCTTGATCCAGTACCCCGATTCTTGTCTGTA  
AACTCCACCGTAAGCCCCTTGTAAGTACGCCGGCAGCAGCGCGCCCGGATCTGGATTA  
ATTGGATCCGGCACCTCATCACCACGGCCGCCTGGGAAGCGCAGCATGCGCGCCGT  
CAGATCCTCTGCCTGTCTTCCGCCTCGGCCTTGTCTTTGCCGTACGCGCAGCGCTC  
AGCCAGCCGTAGACCATCGTTTTTGAGCACTGAGGTGCCACGCCCCAGACACCTAC  
GCTGCGTGCCACCGTCTTGTCGCGGTTGTTGACCTCGGTCTTGGCGGGGCGATACAC  
CGCGCGCTCCGACTTGCGTTCGTTGCGACCACGGATCAGGTAAACCGTCTGCTTGAT

ATAGCCGTTATGCGTTTCCACGATGCGCGCCTGCCCCGCTCTGGTTGACCAGCTGCTT  
CACGAACTGCGCCACTGTCTCGGTCCAGTTGCCGCCATCTAGCGCTACGGCGGTGAT  
CGGCATATCGACGCCGCGCGTGGTCTTCCACGTGCCTCGCAGGTACTCGTCCAGCGC  
CGGGTAGGTGTTCGAGGATGGTCGGATCAAGATCGATCACCGCATAGTCCACGACCC  
AGCGGCGCTGGCCGCGACCGGTGGCAATAACCTGGATCTCGGGCGCGGTCTGTGCTGG  
AAGTCCACGCCCCGCTGTCAGCACCAGGCCGCCAGCGGAACGACGCCGCGATGCAC  
GCCAGGCTCGCCCAGCTTGGCCACCTCGTCTGCGTCTGTTCCTGGCGCTCGCCCCG  
GAATGGCAGGCCGAGCTTGAGGTTGTGGAAGCCGGCTGCCTTGTTCTGGGTACAGGTC  
GGCCTCGGCCTTTGCATCGGCCAGGCCTTTCCACGACGGCCCAAGGCCCAACGGTGC  
ATATGCGGCCCACGCGTGGTAGCTGCGGTGATACGGGTCCGCATCGGGATTGGTCG  
GCTTCCAGTACGCGGTGCCGCCGTGCCACGCTCGGCAAACATCAGATCCTTGTGGT  
GCTCCTCGATCACGCAGCCGCTCGCCAGGCAGGCAAAGGTGCCGTCCGGCTGCAGC  
CGCTCTATGTCCAGCGTCTGCTCGCCGCCGCGAGTGCGGGCACTGCACCATGTACACG  
CGCTGGTCGCCTGCCGCGTGCCCGGCCTCGATCGCGCTGGCGCCGGCAATGGTCGGC  
GTGCAGGCGCGGTAGATCTTGGCGCGGTCCGCATACGACATGGCGCGCGCTTCCAG  
CTGCTGATCGGCCGGCCCCCTGCCCGCCGATATCTTTCGGGTATTCGTCCACCTCGTCC  
ATGAAGATGTAGCGCGCGGTGCGCTGGCGCAGCTGCTTGGCCGAGTTGCTCCAGATC  
ACCCACAACGTGCCGCCGGGGAAATGCTTCTCCAGCATGTTGTTCGGTGTGAGCTTG  
GCCAGCAGCTCCGGCATCTCCATCACCGCCGGGTGCGAACTTCGACGCAGCCCAGCTA  
CGCGCCAGATCCTTCACCGGCTGCGCCACGATCATCGAGTCCGCGCCGCGGTTCGATC  
ACGTAGCCGGTCCAGTTGATGCCGATCTCGGTTGCGCCGATCTGCGCAGACTTCATG  
AAGTCCACCAAGCGCACCGGCGAGTGGTCGCTCAGGCAATCCATGATCTCGCGCAG  
GATCGGGTTGCGGCTTGTGCGCCACGGACCGGGCTCGGCGCCCCGAACCTTTGGCGAT  
GATGCGGTTGGCATCGGCCCACTCGCTCACGGTCTGCCGCGGCGGCAGCTGCCAAG  
CGCGTTCCAGGCGTCGCACACGATGTCGGCCGGCTCCGCCAGCTCTACGTCGAAGG  
CATTGAGATCCAGCGTCATTCCATTTCTCGTTGGTGTTCGTTGCGCATGCCAGGCGG  
CGCCAGCAGCTGCCGCGCTTCTTTCTGCATCGTCTGGGCGATCAGGCGCACCTCTGC  
ATCGAGCATCGCTTCGATCGCGCGTGGGTGCTCTCGGCCGCCAGCTTTGCGCGCAG  
GCGGCCCGGCAGATTCATCATGCTGTTGAGTGCTTGCCGCACCAGGGTGAACACCGC  
GCGCTCAACGCCCTTGGTGCGCGTCAGCTCGCGCGACTCTTCGCCAGCTCCAGCTC  
TGCCAACCGCGCCCCGCGCCAGCCGTTCCGCGGCGCACGGCTTCCTGCACGCTGGGCAC  
ATCACTCGGCAGCACGCGAGCCGTGGGCACATCCAGGCGCACGTTCGGCGCCAGCCG  
TGCGATCGCCGCCACGCAGCGGGTCGGTGATGTCATCCAGCAGCGCATCGCTGGCC  
GCAACGTTGATGCGCTTGCCATCGGCGTGCATGACCAATTTGCCGGAGCGGCGCATG  
CGGCGGATGTACGAATCGCTGCAACCGCGGTGGCTGGAGTACTCGGCGACGGACAT  
GGTTTCGGAACCTCATGCCTGCACCTGAGTTCCGGCCGGAACCAAACCTCCGGAACGA  
AAGATGCATGAAAAGTGGGGTCCGAATTACCCGCGAGACGGCCAAGGTCCAGGAGGA  
CCCGCGCCACGGTCGCGCCCCGCCATCCCGGCCACTACGGTCGCGGTCTGCTCCGCCCT  
GCCACTGCCCACCTGCGCGACGATTCCCGTGGAACACGACGCCACGCGGGCACGTC  
CAGACCGTCCGCACCTCTGCCGCGAGGTCTGGACGGCCGCAACCCTTGGGATCATTG

AGGTGTCCAGACTGTCCACACTGTCCATACCTGTTGAGAGTTTTTGATTGATGGTGA  
AAAAGGGTTCATGTACGTAGGCGCGCGCGAAAGGTGTGGACGGTGTGGACGGCCTTG  
CCGCAGTAGGCGGGAGGTCTGGACACAGGTGTGGACAGGTGTGGACGTTGGCGGCG  
AGGTCTGGTCAGAAGTCCGGTGCATCCGTCGCCTCCTGGCTCGCCTGCTCTCGGCTG  
GCGCCGGCCAGCCACTCGTCCACCGTCAGGCCAGCACGAAACCATCGCGGCTCTCG  
CCCACCGTCCGGCCATCGCCGTCGGTGGTTCTCCCAGCCCAGCGTCTTGAGGATGGC  
CGCCACGCGCATCTGCTCCGGCTTGCCGTGCTTGCCAGGGTCTAGCCCGATGGCGTG  
CACCAGGATCTCGTCGGTGGTGGCCCAATCCACTTTGGCTGCAGAGAACTTCAGGCG  
CGCCGGGTAGCGGTCTCGGCCATGCGGCCATCCAGCCACTTCTCCACGCGCCCCCTC  
CCAGCTGTCGCCCACGTAGCGCGCGGCCTGCTCCTCGGCTGCCTCGGCGGGCAGTTG  
CCACCATTGGAAGCCCGCATCGAACATGTGCACCGCCTCGGCCCAAAGCTGCTCGCG  
CTGTACGCTGATCGCTTCGATAAGCACCTCGCCATCGGTGCGCACAGGCAGGAACC  
GGCGGCCGCCCCGTTGGATCGCGCAGGTACTGGTGCTCGTTGGTCGTGCCGGCGAAC  
ACGCACTCACGGCGATAGGAACGCGGCACGCGCTCGTAGGGCGCTCTGAACTTGTC  
CACGCGCCGGGTGATGGCCGTCTTGACGCTGGTGACATCGGCTTTGGAGAAGCTGT  
CATCTCGCCGATCTCCACGCCCCACGCGCCCTGGATGACCTGATAGAAGTCCTTGCC  
GCTGGGCGACTCACTGGTCTCCACAAACCACTGGCTGCCGAAGATGGCGCGCAGCG  
CGCTGGACTTGCGCTTGCCCTGCTCGCCCTCCAGCACCAGCATGAAGTCCACCTGCG  
CACCGACCGACGGCTGCTTGGCGTCGAACCACAGCACACGTGCCACCGCACTCACC  
ATGAAACATTGCGCTGCGCGCCGGCTGTAGGCCGAATCGGCCGCACCGAAGAGATT  
CACCAACATGCTTTCCACGCGCGGCTGCCCATCCCCTGCAGGCCGGTGAGGAACCT  
GCGGATGGGATGGCGCCGGTAACGCCTGGCCACCGCAATCACCGACTTGAGCACCA  
GCTCGTCGCTGCACTTCATCGCGTACCGGTCCGGGTGCTGCAGCCACGCTGCAAGCT  
CGTATGCATCAGAATCGATGAACTCCTCGCGGCTACCACCGCGCCACGGCGGGTCG  
CGTTCCAGCTTCACCTGGTTGCTCGAATCGTTGAGCCACCACAGCCCAGCCAGCCGC  
TCGTCGTGCTCCATGATCAGGATCAAGTTGTGCAGCGTGCCTTCGACGTTGCGGTGCG  
CGGTTGTACGTCAGCTGCGCCTTCCAGGCGTCCGGGTTGTGATCCCCACCGCCGGGC  
GGTGCCGTGCCCAGCCCACCGTCAACCACGGTGAGCGTCTTACGTTTGGTCAATGTC  
ATCCCCGCTCGCCCTCTTCGCAGCGTTGCGCCTGCTGCAGGCAGTAGTCGTGCCGGC  
GCTGGCATCGCGCCGGTGTCTCGTATGGATTGCGTAGCGCTGCCTCAGCCGAGGCC  
GCCAATCGGCGGGCGTTGGTTGGCGGTCACGCCACAGGTCGCCTTGCGTGGTGTAC  
TGCGCATTGCCTGGCACCACGGTGATTTTCGATCACCCGCCCGGCTGCCCATGCCGAC  
AGTGCCGTGGCGTCCAGCCGTCGCGCTCCAGCGCATCGGCAATGTCCCAGCCGTCC  
GGCATGCCATCGGTATCGATCAGCCGCACGCTGTGCGCGCCTGCGCGCATTGCCAGC  
TGCGCCAGGCCCCGGGATGTAGTGGCCGGCATCGTTTCGCCAGCCCAGCATCGCCTTG  
CGGCTGCGCGTCGGCGTCAGGCCACAACACCACGTTGCGGGCCGGCTAACGGCCG  
CCAGTCGGTCTTGGGCACCGCATTGCTGCCACCTGGCCACGACGCGACCGCATAACCG  
CTCCACGCGCCAGCGCCAGCCGCGCGGCACTTTTCGCCTTCCACCAACAACACGTC  
GGCATTGGCCTTGCCCGCCAGGGCGTCCAGGCCGTAGATTGGCCGCGGCGTGGGGA  
AATGCTGGATGCACCACTGGCGCTTGCCGTCCGGCCCTACGCACCACGTCACTTGCG

GCGTCCACTTCTTCACCTTGCGTGTCTGGCGGTCCGTGAACTCAGCGCGCAGCACGT  
AGCCCAGCAGGCGGCCCTCGCTATCGCGGTAGGCGTCGGCACGCACCACGCGCATG  
CGTCGCAGGCGCCCGCGCTTGGGGTTCCAGATCGGCACCGTCCAGTCGTTGCCGGCC  
AGCAGGTCTGGCGCATCGTCAGGCACTGGCATCAGCGGCACCCACGTCACGTCGAG  
CGGTGCCTCTACATCCATGCGCACGTCATCGCGCGCCTGGCGGAAGTCCTGCGCGCC  
CAGCTGCACGCACGCCTCGTGGAATCGCAGCCGGTGATGGCCATCAAGAAGCCAA  
TCACATCGTGGTGCGCGCCGCAGCCGAAGCAGTGCACAAACCCCTTCGCCGGAATC  
ACCGTGAACGATGGCGAGGACTCGTTGTGAAAGGGGCATAGGCCCCGCATATTCTTT  
CCGGCGCGGCGCAATTGCACATAGCGCTCCACCACCGCCACCAGGTCCACCGTGGC  
CTTGAGCTGGTCCACATCAATCTTGATTTGGCTCATCGAGCCCCTCCCCCTTTCAACT  
GCTCGCGCCGGGCTGCGCTCGGTACTGCACGCGCAAGTAATCGGGCGATGCGCACC  
CGGCAGCCAATGCCGCCGGTGCAAATCTCGGTGTGTTGGCAGCGCTCCGGCAGCGC  
ATCAACCGCAGCCTTCCACTGCTGGCGCGGCGCCTTGGCGATGTCCAGCGCCTTGGT  
GATGCAGCGGCTCACGCTCATCGCTGCCGATCCAGCGGCAGCGCGGCCTGCGGGTT  
GTGATGCGCTTCGTCTGCATGCGCAACCGCTCACGCTCGGCCAGTGCATCGTCGCC  
AGCCAAGCCCGGCGCATCGCTGTAGAGCAGCCGCAGCGCTTCTGCCACGTGCTGCT  
GTGCGGCTGGGCTCAGGGTGCGGCGCATCTGCGGGGCGCGATTGATCGCCATGTCAT  
CCACGCTTGCGGCCTTTGGCCGCTGCCCCGGCGCACGTTGCGCTCCAGGCGGTGGCAC  
ATGGTGCGGATGGCCTGCAGCTCGTCGACCATGAGGTGCGCCTCCTGCAGTGACAG  
GTGCGCATCGTCCAGCGCCTCCAGCGCCACACCAGACAGGCGCCCGGCATGCTTGG  
CCACGTGCAGCAGCTTGGCTTGGATCGCTGCCACTTCATCCGGCCAGCCGTGCTCCG  
GCGCCGGCGGCACGAAGTCCATCGCCAGCTCGAACTGCGCGCCCAGCGATTGAATC  
CAGCAGGTGGCCAGTGCCTGCCCCGGCGCTCAGCTCCTGCATCCACTCGGTAAGCATC  
TCCGCCATCTCCATGGACAGCGACTCGCCCTCCAAACCGCGCAGCTTCTTGCGCAGC  
GATTCCGCCGCGATCGTCTTGCCGCGGCGCTCTGTACGGTAGGCGGCAGCCGCGCGC  
ACATTGCCCCGGCATCTGCGACACCGCGTGTGTACAGCGCGTCGCGCCAGTAGATGTCT  
GAGCGTTGGCACGTCATCGCGCGCCACCCTGAAACGGTGAGCAGTTCATCGTGGTG  
ATGGCCTGGCTGGCCGACGCACCATGTGCGTCATGCACACCACCACCCATTCTGC  
GATTCAGTGCCTTGCGGCGCTACGACTTGCGCACCGGCGTCGGCGATGTGTCGCTG  
TCTTCTTTCAGCACGCCGACAAGCACCCGGGTCAGGCCACAGCACGAAGTACTTCTG  
CGATAGGGAGCTCTCGAAAAACAGTACGATCTGCTGAACTTACGACCGACGTCAGG  
GATCATGGACATCACCTTATCACGAGCATCGCAAGCAGCCTGAAGGCAGCCAAAG  
ACGCTACCGAGGCAATGCTCTCGATTTCGAGATTTCAACAACACCGCCGCTCTGATTG  
CCCCGATTAACGACCAGCTCCTCAAGGCGCAGCAGGATCTGTTTCGTCTATATGGGGC  
AACTCCTTGAGTTGCAGGCCCAGATGGCAAGAGATCGTGATGAGCTCTCCAAGCTTC  
AGGGAGCACTGGAGGAGCGCGGACGCTATTTCGCTTTTCGAGCTCTCCACTGGCGTTT  
TTGTGTACCGATTCAACGATGCTCCAGCTGGAAGCGATGGCAATCCAACCACTCCAC  
AACCCGTCCACTACCTCTGTCAGCCCTGCTTTGACAAAGGGACGAAGAGTGTTTTGC  
AGCGGCTTTCCGCATATGGGCGGATCAGCCTGGATTGCTCCATTTGTAAGGCAAGAC  
ACCCACAGGTGAGGCAATAACCCGCACCTGCGTTTCGAGTACCGGGGGCCTTCAGTT

AGGTTCTCAACCACATTGTTTCTCCGGTACATAGAGAAGAGGCCAGCAAACCTCGGCG  
CCGTGCTCCATGAGCGTGGCCCACTCGTCGGCGGTCAGGGACAGGTCGGCGATGT  
CGCCGTTGTTGTGGATAGGCAGACCTACCAAGGTGGCGAGTTCACCGGCGCTCAGC  
GCGTCGTGAAGCGGTGTGACACGTCGGGACATCAGGCCACCTCTTGAGCGCCAGCA  
GCTTGGCCACCGACTTCCGTAGCAAGAGGAGTCTTCTGCAAAGCAGTCGCTAGCCG  
AACCAACGCCGTGCCTATCTCAAAAGCTACCGACCGCTGCCCATGCTTGATGCGATG  
GACAGTGGGTGCGAAGTGCCGACTTCTTTTGCATGCGCGATTTCAGACCAGCCGGC  
CTCGACAAGTCTGAGTACGGCCTGCGTTGGAGTAGGTTTCGTTTCATAGCACCCATCCT  
ATACACAAACGAATTGGCATGCAATACACAAACGATCTATGCGTGCCACCAGTGGC  
GCCTGACAATTCGGATATGAATCGATTGTCAGAAAATCTGCGCCGCTTGATGGCTAC  
TGAGTCTCTCAGCGAGAACCAGCTCTCCAGAAATACAGGGGTTCCTCAACCGACGA  
TCCATCGTGTTCTCAGTGGGCGAGTCTCTGACCCACGAGATGGGACGCTGCGCCCGC  
TCGCCGAGTACTTTGGCCTGTCAGTCGAGGACCTTCGAACGGGAAACCTCAACGAG  
AAGACAACTGCCGCAAGCGACTCAATCAACGAGCAAATTCCCGCTTACCGTGTTAA  
ATCGGTCGTTGGGGAAGACGGCCTGGACCCAGACCGCGAAGTGGTCGTTGCCGAGG  
TTGACGTGTTGGTGTCTGCCGGCCTGGGTTTACGGATGCCCGAGTTCGTCGAAACCC  
GCTACCGCATGTCTTATCAGCTCTCATGGTTTCGCCAAGTGGGCGCCAAACCCGAGG  
ACGTTTCGAGTCATGCGCGTCACTGGCGACAGCATGGAGCGAACGCTTTTTTGATGGTG  
ACAGGATCGCGGTGAATATCGCCGACAACAAGCACATCATAGACGGCCGGGTTTAT  
GTCTTCGCCACAGGCGGGACGGACCCCGACGTAAAGATAAAACGTCTTTTCAAAT  
GACAGACGGACGCCTACGTATCGTCAGCGATAACGCAGACAAGGCACTCTATCCTG  
ACGAGATATTGGCCGCAGAAGAGGTGGCAAATGTCTACATCGTCGGCAGAGTCATC  
GATCGAAGTGGCAGAGGGGGGCTCTAGTGGCCGCTGCGAATCTGACCTAAGGGAGG  
GAATATGGCTCTTGTTTCGTGCAGCGAATGCGGTAAAGAAATTAGTGATAAGGCGA  
GCAATTGTGTGGGATGCGGCGCCCCGGTGCTTCACGCTCCTGTTGCGGACACACCCA  
CTTTGGGACCGGGTACTGCCCACACTAAGTCTGGAGGGAAGTTACTAGTGTGGCTAG  
GCATCCCAGTGGCGCTTGTTACGCTTTTCCTGGGCTGCGGCGCCATCCTCTCAAACA  
CGCCCGAAGGGGAGCAGCGGTCTCGCGAACGGCTAGCAATAGAACTGTGCGAAAA  
AGACTTAAGCCGGGTGAAGGAAGATCCCAGATCTACGCCAGTACGGTGGGCTTCG  
TCATGGACGCATGCGCGAAGATGCGTAACGACTTCAGCACCAAATGGGGCCGCTCC  
CCATAGGCATCCAATTCGTTTAAGTATTGCATTTCCAATTCGTTTATGCATTACTATG  
CCTGTCGGCGATTTTCGCTGACGGGCGACCGGCGGGTCGTCCCTGCCGGCCAGCCCTC  
CCCTCTGCCCGGTAGCAGGCCCTCCCTGACCTGACTGACCCGCCGGCGCCCTCCT  
TCTTCGGAGAGAGCGCCATGTCCCGAATGCAGACCTTGAGCTCGAGGAGCTCACC  
GCCGCGGTTTCGCTGAGCGGCCCCGCCACGCGCCGCTGCCTCTGCGCCTGTGCGGCC  
GCAGACCATGCCCACGCCAAGGCGCTCAAGCGCCGCGGAATGTCGAAGGGTCCGAA  
GCGCTACCCAAAGCGTAGTGACCGCATCGAGCTCACTGGCTTGCGGGCCGAAGCAG  
CCAGCCGCGACTTCGTTTCGTGAGTTGCGCGCATGAGTGCTCTCGCCGCCAGGTTGAC  
GCCTGAAGATCTGACAGCCGCGATCATCTGGGCCGAAGACGCCATTCGCGAGGATG  
CAAACACCCTCGCGACGCTCGGCGATTACGCCTCTGCGAGCTATGCCTCGTGCCTTC

AAAAACGCATCGCCAAGCGTAGGGAACAGGTAGCGCGCTTTCGCTCCGCACTGGCA  
GAGGCGAGCGCCGCATGAGTGGCTTTCCTCAGCCAACTTTCGCTTGGGCGCGGCC  
AAGGCACGTTGCTACGCCTATGCATCAAGGGCGACGCCGTCAGCGCTGCAATGTAT  
GGCACTGACCGCAGCAGCGAGATTGCAGTGACGGTGTGCCGCGTTGGTGATGTGCG  
CCGCATGGAAGGCGCCCTGCAACTCGGCCAGACCGCGTACACCGCCGGCGATGGCG  
CGCTGCAGGCCATGTGCGAATGGATGGCCGCGCACGGCGCATCGGTGGCGGTGACG  
CCATGAGCAACCGCCCCGCTGGAAGCCTTCTTCCCCACCGGCCATGCCGGCCAGACGC  
TGGCGCTAATGATCTGCACCGACTGGATCTGGGCTGGCCTGTACGACGGCAAGGTCA  
CTCCGTCGCTGGATGGCTGCGCCGTTGCACCGCGCCTGCGTGCGCGCACCAACGCC  
GCCATCTGTGCATCGGCAGCGACACGTTTCGCACTGGCACCACGCGTGCTGCTGCGTG  
CAACGCGCTGGCTGCGGCAACACGGCGTGCACGTACAGGAGCCACGCGCATGAGCC  
GCACTTATCAGCGCGCCCTCGCCGTTGGCTGGACAGTCGTGGCGATCACCGCGGCCA  
TCTGTGTGCCGCTGCGCCTGGCCGAACTCCACGCAGCGCATCGCGGGCGCCGGCGCA  
ACGCACGTGGTGGATAGCGAGCAATCGCCCCGCCCTCCCCACGTTTCGGCTAGCGCA  
GGCGGAGGACTGACATGCGCCAGGAAGCCATGCCGCTGCCGTCCACCGTTCCGCAG  
TGCCAGCCGGGCCACCGCCCGCAGCTGGTTACCACCCATGGCGCACCGCACCGCTA  
CCGCATCGGCGGGCCGGCGCCGACCACGTTCCACATCGAGTGCTGCCGCTGCGGCA  
AGGCCACCGCGCCAAGCACCCAGCCGCGCGCTCACCGAAAGCCGCTGGACCGAACCC  
ACCGGCCAGCACCGCATCCCCTTGTCCACCTGAGCCGTGCGCGCGAGCAGCTGTTT  
GCCCAGCTGGCGCACGCGGCCACGCCGCTGATCGAGGTCACCCATGCATCTACA  
ACCCAAAGCACAGGCCGCGCTCAAGGCGGCCTACGGCGCCCAGGGCCGCACCCTGC  
GCCGCACCCGCGGGCGGCTTTGCCGCCATGCCCGCACAAGTGAAGACCAGCGGCCCC  
GTGCAGATCCAGGCCTTTACCCGCCGCTGCATCAACTGGCTCGACGAAGCCGGCCTG  
GTGCAGTTCGACGACCCGCAATTCCCGAACGTCATCACCTCAACCCGCGCGGCGTC  
GCCTACGCCGAGCAACTGCTGCGCAACGAACCCGCTGCGCGTGGCAAGGCGGGTGC  
GCAATGAGCGCCTTCGCCCTCTCTACCGTCCGGCACAAAGACCGTGAACGGGCCAA  
CTTGGCCGACGACCTCAAGGCCTTCGCGAAACGTGGCGGCAAGGTGCAGAAGCTGG  
GTGCCACGCCAGTGCGCAAGAGTCTGTGCGGGCGTGAGGTCAACGATGCGCGCGTA  
AGCAAGTCGGCAGGGACGCAACTGTGATTACGGCTGCGCACATTTCGCGCGGCGGCG  
AGCGATGGCATCCGTCTGGGACGCCAGGCCAAGGCGTCAGGCCACACGCCAAGTGC  
GGGGATCAAGACTTGTGGCGAAGGCACAGCCGATACGCAATGCCTGCGCGCGCGCG  
TCGCTACGATCTGCGCCCTCGCCCGCACCTTCGATCGTGGCAATCGGATGCGGCCGA  
TCGCGATGGTAGACGTAAGCGTTGGAGAACCACTTCGGCTCTCCAGGCTTTTGAACC  
TCCATCGTCTCGACGCGGAATTCTCCGCAGTAGCCGTGTGTGGCGGTCTGGTCTGAGC  
GTTCTGTGTGGCATGGACGAGATGATTGCTCTGCCGCTTTAAGACAGTGTCGACTC  
GAGATCAGGATCTACGGACGCAATCGCTACAGCTTCCAGATGAGCTCTGGGACTTCC  
TCTGGACTGGTTCTGTAATTCTTGGGGTCAAGCTCCGCGATCAGGGCACGCCCTGCG  
ACGACAGCCTGCCTGTGCGCGTCGTCTCGATCTTCTGCACGACCGGCTTTTTTCGAGC  
GTGGCGACAGGCTGCACCTGGTCACGGTGATAGATGAAGGCAGTCGTGTTCCAGTG  
ACTATCGGCTGGCGCTCGACTTGCCATGGTGTGACCCGGAATTCACCGAGGTGGCC

ATGACTGCTGGCGCGGCTAGGAGGGTTGTAAGGCATGCCGCTGATTGTGCAACAGC  
GTTCCGCGAACGAGAACTACCGGCCGTCAGCCTAGCCGGGTCCC GCGCGGCCGACT  
TATTCGCTTGCGTCGTCAGCGTAGACGCTGGCGTAGATACGCTCCAGCTCGTCTGCA  
CGCCGGCGACCGATGGTCGTTGCCTGCAGTCGCGCCCAATAGAGGTCCTCGGACCGT  
CCCGCATCAACGATCCAGTCGACCAAGCTGTCGTGCGGCGCTCTAAGGATGTAGGC  
GGTGGAACGCCACTCAGCACCAACCCGATACTCCGAAGTGGTCACGCGGAAATTTG  
CGCGCCCCCTTTCGATCACCCATTGCCACCGCCCCCACGCTCAGCTAACGCGAGGAG  
CCTGCGTGATGGACTATCGACGTCGCGTGATCCGGGGCCCATGCGGTGTGAAAAGA  
AGCGAATTTTTCTCTTTCACCCACGTCCCAATGAGCGCATTGGTCGGTCAGCTTTCCA  
ACTTGCTCATGCATCCCCCTTCGGGAGCACCTCGGGGCTGCTGACGAAATTGGGCAA  
GGAGGTAGCTCGTGGCTGATGGGTCTTCTCTTTCAACTTCCCCGCTCCGCAGGTCTC  
GTGCCTGCGCCCGGGCGAAATCGTGGTCGACCTATTCGCCGGCGGCGGCGGCCA  
GTGAGGCGCTGAAGCAGGCGCTGGGCGTCGATCCGGCGCTGGCCTACAACCACGAC  
GAGTGGGCGATCGGCATGCACGCCGCCAACCACCCGCTGACGATCCACCACCGTGA  
GGACATCTGGCACGCCGACCCGCGCAAGGACGTCGCAGGCCGCCGATTGGCTGGT  
TCCATGCCTCGCCGGACTGCACGCACTTCAGCCAAGCCAAGGGCGGCCAGCCGCGC  
AGCCACAAGACGCGGGCGCTCTCATGGGTGCGGCTTAAGTGGATCGGCCAGCTGCT  
ACGCGCCGACTTGCGAGACGGCACGAACACCGCGCCGCGCATCCTGTGCTGGAGA  
ACGTGTGGCAGATCCTGACCTGGGGTCCGCTGGTGGCCAAGCGCTGCAAGGCGACC  
GGCCGCGTCATGAAGATGGACGGCACCGTGGCGGCGCGTGGCGAACACGTGCCGGT  
GGCGAATCAGCAGCTGGTGCCGGACAAGCGCCACGGCGGCCGCACCTGGCGCCAGT  
TCGTGCGCCGCGCTGGAGTCGAAGGGCTACCGCGTCGAGTGGCGCAAGCTGACCGCC  
AGCGACTTCGGCGCCGGCACCAAGCCGCGAACGGCTCTTCCTGCTGGCGCGGCGCGA  
CGGTCAGCCGATCGTGTGGCCGGCGCCGACACACGGCACCGCGCCCGGCATGCAGC  
CGCGCGTGCGTGCTGCCGACTGCCTGGACTTCTCCATCCCCTGCCCGTCCATCTTCAC  
CCGCAAGCGCCCGCTGGCAGATGCCACCCTGCGCCGCATCGCAAAGGGCGTGATGC  
GCCACGTGCTGCAGTCGGCTGATCCTTTCATCGTGCCGGCTACGCATCAGGGCTCGG  
AGCGGGTC

>CONTIG\_18\_length\_13392\_cov\_38.594271

CGAAGAGAAGTGGCTTTGTCGCGTAATGATCTACTCTGCGACACAGTAGGGCTTCAT  
AGGCTTGGTTAAAGCAGTCTTCAATTTGGATGCCAGGGATGCTGTTGAGGATATTCA  
ACGCTTGCCGAGCCATTTTCATGCTGCGCTTCTAACCATTGCTCAATCAGCTCCGCCTC  
TTGATTTAAAACCTCTGCACCTTTGCCGGTAGCTCTCGCCAATCGTGTGACTTTGCTG  
GCTTGTCTGGTCAATGGGCTGTATTGGGTATGGATGCGGTTTAGAACCTGCTGACTT  
GGTCTGTGGCCATTGGGATACGGTTGGCCATCAAAATGACGACTCTCCCGCCGAGCA  
AAGCTTCCCTGCCCGTTCTCTCTTGCGCGATCCCGAAGCGCTGCTTCATGACTGTGGC  
TGGCAGGCACATTATGGACTAGACGGCTTTCCCGGGAAGACTGGCACTCTTTTAAAA  
TTTGAGCAAAGCGTCGATCCGCTGGTGTACCTTTTCTCCAAGACCACAGCTCTCTG  
ATGGCGCTTGGCCTGGAAGAATCCCCACGAGAGATGCGTTTTTTCGGCGCTCTGGT

GAGTGCCCTGGCCTTTTCAAAATCGCCTTGCTTGAACGCATCTTGCGCTTGGACTCTC  
AGTGTTTCGGTGGTCCACTCGTGCTTCAACGCCGGCCATGATGAGATGCGCATTGATG  
GTGGATGCGATCTTCCCACGAAGGATCTTCATCTCAGTGGCCCCCTGCCCCCTTGCCTT  
GCATCTAACTCGGCACAGGCCCCGCTCCCCCTAGTCCATTGGCATCGACCTTTTCGGGCT  
GAGATGAGAAGATGCACATGATGATTGCGTTGGTCCCCCTCTTCGACCAGGTGAGTGA  
ACAGCCACCAGCACAGCAGCTTGATAGCGATCGACGAGAAGCTGGCCAAGTGCAAC  
CGCAAGCATTCTGCGCTGTGGAGCTTCTAAACTGTTTGGCAAGGAACTTCGACTTC  
CCTCGCCACGCGAGCATTTGCTCTCGTTTCTTGCTGCTCATTAAATATCCCAGAAGCTT  
CGAACATTGAGACACCATCTCGGTGCCCCATCGGGAGCAAGCATTTGTTGTGAAACA  
ACGCCCCGATCTTTTCCCATATTTGTGCGTTGTCTTGTGAGTTGTATCCCGCAGATTGA  
TCCCTGCACGATAAGCGGCCCGCCGCCACTGATGATTGACCTTTGCCACGACTAAACG  
ATTTGATATTGACATGATAAATTGCCATTAATTCCCGGTTGAGGTTGGTTGATAGTG  
GGAATATCAAAGTGGCGAATTGCTTGTCCGTCTAGATGATAAGGACGATTGTAAATT  
GGAGAGATACGTACGGTGTTTTTTGCCGTTATTCGCATGAGACCACGACTCATTCG  
TCTCGTCAGAGACGGCTTCTCATCGCGAAAGCGATGCCACGGTTTTTTGCGAAGCAA  
ATAACCATATGTGGGCCCTTGACCTTCTCTTTTTAGGTATTTCTTTGAGGGAATATTA  
GGTGTGAATTTAAAACATATTTTGCAGGGTGAAGATGTCCAACGCCCAGGATCAAAT  
GAACATGAACAAAACCTGTACGGACCAGGTATAATGTGATCCCAAATGCCGCAATC  
AAGCGGCAAACAAAGACCGTCAATCACAACCAGAAGGCAGCTAAAAAAATGGAAT  
GGCTTAAATTTTTAACAGGCGAGATCGCTGCTGGCTCCATCATCGCTTTTCTCTTAGC  
GGCTGTCTTTGCATGCTGGCGCTCGGGCTCTTTACACCCGATCAACACGCGAGTCCT  
GCGATTATTTATCAGCAAAGACGATATTGAAGACACGGTTATTTCGCAAGAATTTGGC  
GGATCACTCCGCACTTGCGGGATTTCGAATGGCACATCAAATTCACGTCCAAACGCT  
TAAAGACGCTAAGGCTCTCATCGGCTTTTCGGATTTACACAATATCCCGCTAAAACT  
CATTGGGCATGCGGGCTGGGCATTTGATCTCAAAAGCCATGTCATCCACCCCAAAAG  
GGTTCACCCCAAGTGGGGGGTGATTTTACCATTTATCCCTTTTCGCGTCATTTATTTTT  
CTTGCCGTCGTCTTGGGTGTGATTGCAACAAAAGATAGCTTGCTGGTTAGCCTGAAA  
GAGACAGGCACCGATTTATATATATCAGAACTGAGGCAAAAACGACAGGGTTTTT  
TTCAAGCAGGAGCGATACTTTAACTATCGATCAGTGCAAGAACACTGCCGACAAAA  
AAGTCATCCCGCCCACATTCGACCCGAGAGATCTTAAAATTCTTTGCGAGGTGTGGA  
AAGACCCCGTCCTTAAATCACATTTAGCAAAAGAAGTGCCTAGGCAAAAATATGCG  
TCACTGCTTGCCTTCCCGATCGCACTATGGTGCGCTTGGCTCTTCTATACCGTATGTA  
GAGAGTTGATCTCTGCAAAACAACTCAAAGATCTTCTTGAAGAGCGTCAGTTAGGCA  
CAAGCCAGTAGAAACGCATCGACACTTGAATGAAGCGATAGATGAGGAGGGGGAA  
CCCTCCTCATCTATATACAAACGCTAAATCTTACTCGATAGGCCTCGGAGACGGACG  
CTGATATTTGGAGAATGTTTTGTAAAGCGAAGCTGCACGCTCGTCAGCAGCAACGCT  
CTCAACGCTACTCAACCCTCGAAGAGCAATGTCAGCAGATGCTTTGCCGTCTCCCAA  
CAGATACGCCAAACGCAGATATGCGGCACTATCGATCAGATTTTTATCCTTAGTCTC  
GCTGGCATAGATATCCGACAATCCATAATACGAGTATAAGTTTCCAGCAGATGCCGC  
ATTCTTAAAATGCCAAGCCCCCTCTGGAAGTGGCCACTCGTTGCCGTCTTCTTTCCA

TAAATGACAGTTGCGGCCCTATTGCCCGCCTGCGATTCTGCCTTCAACTGATCCAAC  
GTCAGTTTGTCCAGTCGTGCAAGTTCGACCTCAGTTGGATAGCCATTAGACAAAAGC  
CACTTTGCCTCGGCATCCGAGTTAGCAACCAAAGGGCCACTTGCCTTGCAAGCACTT  
CCGCCGCCCTGACACAAATACTGCTTGGCATCTTGACGCGCGCTAGGCTGCGCAAGC  
TTTGCCGTCTGCTGCGCTCCATCCACAGCTGCGCTGTGATCAGCTTTTGCAGGCGCA  
GAAGTCCCAGCCTGGGAAGCTGGCGAGTTGCTATTTTCAGCTGGCTTGTTCGGTTTTT  
CCACAGGCAGCAAGCGCGCCGGAAGCAGCGCCATGGACAAGATCATTTTTGCTTT  
CATAGTTCTATCCATTATAGGCTGCACTGATTTTGCTGGAAATTGGTCCACCATGCTG  
AGCATGCACCATCAGCGGATGTGACTTTCCATTTTACTCCGATTGAGTTGTCCAAGC  
TCCCTGAGCTTATCACTGCTCCTGGCACATAACTTTCAAGATTAAGTGCATAGCGCTT  
GGACCAATCGATGAAAACTGCACAAAATTCATCTGATCGTCTGCTTCAATATCAAG  
CGCTTTCATGATTTTCGAAGCAATAATACTCAGGAACGGTCAACTGGCCAGGAATTTCG  
ATACTTGCTAGACTCAATACTCTCCAACTCGCAGACTTGCTTTACGTCCTCTCGAAAA  
ATCTTGGTGCGCTCTTTAAAAGACATACCAGGATTTGCGTAATTTGCCGTCTGTTTGT  
TTAAAACAAAGTCCATCAGCCATGCTGCTGTCACATTTGGTGCGGCGGTTCGTTCCAT  
TGGGGCCAAATGCCCTACCTTGCGAGTAGCCAATGGCCATCAGCACAGTAGATTTGC  
CATTAAATGCTAGCCCCGGGCAATTTGTCTTGGGCGTAGGTTCGCGCCAGATGGAAGCG  
GTATCGGGTTTGGACACATTGCAGGCTTGGTTGCCCTCAAGTTCGCGCAAACCACTT  
CCGGATCCTCTCCGCTACCGCCGCCACCACCATTTGTCACCACCACCATCGCCCGGAT  
CTGGATAGTAAGGTGGTGTTCGGATTTTCAATCGGAGGCGGGATATAGGGAGGTGGA  
ACTTCGACAGGCGGCATCGTCGTGGTCCCATCGGTGTCCGTGCTGATGCCAACGGC  
GATAAGACGCTTGCGACCCCGGCTAGCACCAATGTCAGATAAATGGTTCGTCTGATC  
GCAGCTTTGAGCTGCTTAGGCTTGCCGTCTTGCGACTCATTCAATTTCATAACTATCC  
TTATTAATAGAGCGATCAATTCCGATAATCAGGATTTCAAGCTCGGCTGAGTAAAAT  
ATCCCCTGTTCTGTTCCAAAAGCGCCGGTAGACGCCCCATAATTTTTGCAGCAAGT  
GCTGGACTGCATGCATTTTTTGCCAGCACAAAGCGTTTCTACGGATACATATCCGTAT  
GAAAGAAGTGACCACAACGCTCTCGGATCTAAACCAGCTGATGCTAAGTCAGAAAT  
CCTTTTCAAGATCAATTTGATTTGATCCAACCACGCCTTTGAATTACTGAAATTTCTGA  
CTTGTTGCAATCAAGGATGCCTGCATCCAGGTTTGACCTGTTTCGCTGTTTGGCAAAG  
ATCAGGCAATGCGCAATATAAAGCGGATAAAGATTTTCGATAGCGTCCAGAAAGATT  
GATCAAGAGGGTGCGGGTCACCCGTCCATTGGTGTCACTGAGCGGATGGATACAGA  
TCATCTGATACGCAATGGCTTCGAAAAATGCGCAGTTGACCGGCTGGGTGCTTTTGC  
CTTGTAGCAAATCTTCAAGGTTTTTCAAAAAGAGAAGGCAGTTGATCTGCCTGCGGTA  
AAACAAGCCACGCTTCAGAAGGTTTCTTACCACCAACCCATGCATTATCTGTGCGAC  
TTCTGACTTGGCTATTGCCTAAATTTTTGGCCAAATTTAATGACCAATTTAAAACACC  
ATGCGTATCTGGAAGTCCTGCTCTGAGGGACGCATTGATGGCTGACGCCGCGTGTCTG  
ACTTGCCCTCAAATCAGGAATGGCAGAGAACTTCCAACCCCCTCTGCATACGTGAAT  
TAACCGGGAAGACAGGGCTGAAAGGTAGCCGACGCATTGAGCATCTGACTCAAAGC  
GTTGGTAATCCTCTATTTTTTACGTGTTTGAAGTGGTGGCTCTAACAACGCTGGCGT  
ATAGACCGAAAACGATGCATCGAGCCAAACAGAAGCATCAGGCGCATCGCGTCGTC

CTGGAAGTGGCGCAAAGGCCAAATCAAGCGGCGCTAACTCAAAATTTCCATCCATA  
AAATTTTCGACGCACTGACGGAGCCCGGGCAACATGCCCTGACAACTATGTCAAAGC  
AAGGCAAAAATCACACGAAAAGTGATGAGCGTCACACAAATCATCAAAACTCGATG  
ATTATCAGAAAACCCCTACAGCCACTGCGCACTTCACGGACAAACGTGATGCCAGTT  
GACGCACACGATTTGTCTCGGAACGAGACTTGATATCAGCCAAACGATCTGTCGTTG  
CTCATCAAACGAAGGCTTACCCAATGCTTTGATTGGCTCGGCAAGCTTGACTCTTGC  
GCTATTTTACCAACTTGACAATGAAGGGAGGCTGCTTATAAAAGAAGCTGGTTATAA  
AAGGAGATACCCATGAAGAAAATGATACAAATCATCAAAGAAGACTGGCGCTACAT  
TGTCTTCCTCATAGCATAACGCTATATGGTAAGCAGATTAAGTTTCTTCCAGTCATGA  
GGAACGACCAAAATTCAAATAGACTTTCAAAAATAATGGAAAGTTACGGTAATTTT  
CTTATCGCTTTCGGAGACTTTTTCTTTGGAATTCTATGGTCCCCGTTGGGAATTATCG  
CAGCTCTTCTATTCGTAATAGCTTTTTCGATATTGGGGGCTATTTTCCGATAGAACTA  
AGGGATTTTTTCAAAAATCTGACGAATCAAGTCGATATGTCCGTTCCAAAGTAGCCCG  
AGCCACCACACTGTATAGCCTAAGTAGACGAAGAGTAATAGCAACGCAAAGGACAT  
CGCGATTTTATTAATACGGCTATTTGCTCTTTTTATCTTTTTTATACCTAAGCCATGCA  
AAAAACACTGCGCAAGCCAACCCTGGCGGGAATATCATTGCATACGCAATGTTTTCA  
GACTGCTTTTTTATAGAGAATGAAAAAACTAAACCGACGCATATCGTCGCAACGGA  
TATCGAATAGAGTAAAGCACCGACTTGAAAGGATTTCTCCCAATTCAACAATTTGAC  
CGTTGCGGGCCTCTCAGAAAAATAAATACCTGCGCCGCCAGCAAACGCGGCTAATG  
CGGGGGATATGTAAGCCAAATATTCAAAGTAGTCAGCCGTGTTCTTGAAAATTGGG  
AGGCCAATGATGACGAGAGCCAAAACCAAGAACAAAAAGAAATGAAAGATCGATG  
GCTCAAATAGCGCCAATGGCATGGATTTTTTACTGGCAAATTCTTCGAGAGTTTTTAT  
ACGCTTTTCGAGCGCAATTATCTTGCTATTATTTTCAGCGTCCTTTCTTTGATATTCCC  
TTATAAGAGACAACTGATCCTCACGGGAATTTTTGCTTAGCAATGCTAAGAGTATCG  
AGGATCCAAATATTTTAAAGACACTCGATAGTTTGGACATCGTTTGACCCGTGCGGC  
TTCCAACAAATTAAATTCTGCGATCAATCATGATCGCCTTGAATTTTGCTTTCCTTAG  
AAAAATATCCCTTGAAATGCGCCAACATCAACTGCCGTTGCCTTTTTTGATATCTTGG  
AATAAAAGATAATCATCTCTGCCAGATCATCTTCATCGGTAAAGAGCGCAGGCAGG  
GGCAAACCTAGGGCGTCAGCAAGTCGTTGGGCTGTGCGCAGATCGCACTCCCTCCC  
GCCCTTTTCATAGCGGTTGATCCGAACCTCGGGCCACGTCAACGCTTAGGCCTGCGGC  
GACGCCTAGCGCTTCCTGCGTCAGATTGGCGGCCAAACGGGCTTCGCGCAAGCGCTT  
GGCAAAGAGAAGACGGGCGTCGGGGAGTTCCAAAACGTGACCAAGGGCTGATGTCC  
TGAACGAGCATGAGGTCTCCTGCTTGCGCCGTCTGTTTCCATTTAGGTAACATCATAT  
ACATCGACCATCAGCAGGGGAAGTCATGGGCACGCCAGAGCACGAAGTAGCGGAG  
GAGATCCACAGGCGGCAGGTTCAAGGGCAGGCCGCTGCACAGCTCACCCGGCCCCCT  
GCTCAGTCGAGGCTGGCGCATTGCCTATGTGGGATGGGCGCTCCCATCCTTCCTGT  
CATTGGCTTCTTCTTCCTGATCATCCTTTCGATCGTTGCGCTCATCCATGGCGTGTTG  
GCCATCGTCAAAGGCAACACCTCAGGAGGCTTACGCCTGGTCTTGGCTGCCTGGCTT  
GGATCAACCGGGGTTGGCCTGCTCTGGATGGGTGTCTATGCCCTTCTCTTCGCTCT  
TTTAATCAAGGAATGCGCATGTCTAAGGTTTCGTCTGATCACCATTGGATTGATGGTT

GGCATTTTGGCTGCTTGCTCATCTGGTCCATCTGAGTCCAAGGCTGAGGAAGCAATG  
CTTGCCTATGCCAAGGCCAATGGTTCCGAAGATGCCAAGCTCACCAGCTTTAAGCTT  
GGGGAGTGTTGCGAAATCTGATAATGGTGGCTACAACCTGCCCTGTTGAATCGCATATC  
GTTGCGATGGGCGGCAATTCGACCAAGATTTCAAGGGTGTTTTTACCTTTGCCAAG  
ATCGACGGGAAATACAAAGTGGTGGGGACAGTGAGCCGCACGTTTTTAAAATAATTG  
CGAATAATTCGTCCAAAAGCCCCGCAAGGGGCTTTTTTGTGTTGGAATCGCTGATCGAG  
GCATATTGGGAAGGGATACCCTCCCCTTGTGAGGAATCAAGTCGGGCAGCGCCA  
TCAACAGGCGATTTCCTGCATGGACTCATGAATCATCTTGACTGATGTTGATTCCGCA  
TTATAGATCTGACATGGGCAAAAAACGACACCGACTGAGTATCATGTACCAAGC  
CTCTTCTTGGTAAAGAAGAGCGAGCGTTCCGGACTGAAATGGTAGAAACAACCTTAT  
AAAGTCCTCAGAGCCACAATGTTCGCCCCGCCAAGCGGGTAAAGCACCTATCCCA  
ACTCTATGTCGATGGCCTGATTAGTGATAAAGAGCTAAGCGCGCTCTTGAACGCTCG  
CGTTTCTAAGTGATTGAACAGCGCAAAAAACAATCACTAATCTATAGTTGACCGAC  
CGTGATTTTCGCATTATAACTATTGAAACAGAGCGATTTCGCAGGAGGAATCAAAATG  
ACAGCACCAGAAATTACTACGAAAGATGGGTCTGAGCGCCAGCGCTTTATTTTGGGA  
AGCAAAGGCAGTGTTCAAATCGGACGGCTTTGAAATAACTCCTAGGATCGAGAAAC  
TGACCCAACTTTACATCTCAGGCCAGATCGACTTTGAGGATCTTAGAAAACTCCTCA  
CTATCGATACGCTCCACTAAGCTTGGA AAAATCATAGAATATGATGATTAATCATAA  
ACGATGCCTCAAACATCCACCCAGCCTATTAAGGGGACCAGTATGGTTATAAAATA  
AACCGAGCTAAATTTGGCCTCTTTATTAAATTCATTGCGCACTATTGACAGCACTCG  
ATGAGCTATTAGGTTGGGCGGGAAAGGTGATGCATGAAAATAATCGGCAACGACGA  
CAGCCCTAAGCTCCAATACTCCGTAAACGCGTTATAGCGGGAAACATCGTGCTTGA  
AGGCCTGACTGTCGAAGGACCCAATGCGGAAAAGTATTTCTAAAAGTTCTCGACA  
AACTTGCCAGCAAGCAGAAGCAATCTAACTCAGCGTCTTCCTTCGACGCCTCTCCCA  
GTTCTTTGCTCCTCCTAGAAGAAGCAATTGAAAAATATAGGGAAGACATCAAGCGG  
GAGCGAAAAGGATTAAGCGGCCTCATTGCCGTGACACACACACTTTCAATATTGGC  
AAGTGCGGTTGGCAATATACCCGTCGCCCAGATCAATCAAGATCACATCCGATCCAC  
GCTCGATAGCTTCGGATGGTGGCCAAGTAACGCTAAGGCAAAAAGGAATTCAGGG  
GGTTGAGTGCCACTGAAATTTTAAACATTGGCAGAACGCGTCCACCGGTCGAAATTG  
CTGCAAGCACCTATAACAACCACTTGGCCCGTATCTGCGCGTTCTTCAACCGACTTG  
CTGATATGGAAGTCATCGCAAGCTCTCCGTGCAAAGGTGTCAATACCCGGGTCAATA  
CCTCCACAAAGCAATCCAATCGCAGACCACTACGGCCTGCTGAACTTGCCGCAATTT  
TTAACCCAGAGGAATTTAAAAAATGGGTAAAACAGCGACCCGAGCGTTGGTGGGTT  
CCCCAGCTTTGTTTATATACAGGAGCGCGAGCCAATGAAATCGCTCAGCTTCAACTA  
GCGGATATCGCAATTGTCGATGGGATTAGCTGCATTGCCATTCGCGTGACCAATAAG  
GGTCAGACGGTCAAAAATAAATCTTCGATACGCGTCATTCCCTTGGC AAAACCACTT  
ATCGACGCAGGATTTTTTGACCTATGTGGAAGAAGTCAAAGCCACAGGGCACCCGCG  
CCTATTTCTCACTTGGCAGCCGGCCACACCCTCTATCAAGGTGACGCTTACTATCG  
CGGTTATGGGGAAAAGGTCATCCAAGACTTTTGCAAACGTCTAAAAGAAATGGGAT  
TTGAAAAGGCGTTGGAGTTCATGCTTTTCGCCATACCTTCTCCACCAATCTGACCA

AACATGGGATTGGCGTTGCTGATATTGCATTGATCACTGGGCACACCATCCAAGGGG  
CAAAGCCTGACAGCGTGACTGTCCCCGGCTTGCAAACCTACATTGACCGGAACGAG  
TGCCCTCCTGAGCTTCGAGCGATCTACGCAACCATTTCAGTTCAATCCAGGCATT  
GACTTGCCCTACCTACACGCCTGGACAATTTGCAAAAAGCCTTCTCAAAAAAAAAACAAT  
TTCAAGAAATAAAAAAGCCCCAGCATGTGGGGCTTCTTGTCAACCAGGGTATTTTCGG  
GAACTTCTCGTCCGGGTGCTTTGCCTTCCATTCTTTATAAGCCGCTGATCCTTCGTAA  
GCTGCAAAAAGCACGTGGGGTCTTACCACGACCAGACCAAGTTTCCTGCGTATGGGG  
AAGCCAATACTTAGGAGCCACTTCCTTGCAGTGGCCGGCTGCTTTCTTCGGGCGGCC  
AGATCCACCAACAGAAGCCCCGAGCTGAGCTGCGAGATCTGCTTTTTTGCTTGGCGGT  
AAAGTGCTGGCCGAAGCGGCTCAACAGATCAGATACCTGATGGAAGGTGTTTGATG  
CTTCTTGTTCAATAAGCTTGGCTTCTTCCTCTTCGAGCTTTTTGAGCTCTTCAGAAAG  
TCGGGCTTTGGCAGAAGCAATGGAATCAAGGGTTGGCTTGGACATTAGCAGGGTCT  
CAAAGGGATGCGCGCGAATTATACCTTATGAAAAATAAGTTGAAGCTGGCAGCGA  
GCTATGCCAAATAATTTTTCAAGAACGCTGCAATCTTTTCGGTCTCGCTTAGAGGCA  
ATTCTTCGACATCTCCCCATAGCGTCCCCCGTCATCCATAGTTCCCGCAACGTGGA  
AGTGCACATGCCCTATGGTTTGACGGGCATCGATTCCATTGTTCTGCCAAACGGCTA  
TTCCAGGTCGGCCATAAGCCGCATCGATCAGGCGCGCTGCTTCTCTTACTGACAGGA  
TCAATGCTTTTGCGTATTTCGTCTCAAGATCCAAGATGGTAGGACAATGTTTTAGCG  
GAATAACTAGCAAATGAGGCTTACCCCGCTGTTCCCTTGTCAACAAGGGTCGCCGTCA  
TATCATCTCGGCACAATATGGTATAGGGCCGATCCCCCCTCAAATATGAGCAAAATG  
CACAGGTTTCATGTTTCGGAAGCTCAATGCTGCTATTTGTCATCACGAACCTTCTCAAT  
GATGAAAGAAACGCCTGCAATTCAAGCCGATCAAGCTTTTTGAACACCTTAGGCGG  
AACAACGATTGTTAGTTGATCAGACACCTTCTTTTTTCGGGATGCAAACATAAAGGA  
GAGAATAATTAATCTGATCGAATCTTGTGCAGGAAGGATATTCGAAATTCTTGACGG  
CCCTCCTCCCCATGGTGTGATAGAAATCGGCTGGCAATTTCCCGAAGCGATCACTTC  
ACTCCACAGGTCAAACAAGCTTTTTGTCAAACCTCTCTATCTCGGAGCTGGCTGAATT  
ATTCGCATCCATCTCTGCATAAGCGGAGAAAAATAATTTTCTAGCTTGGTTCTTGAC  
GACGGCAACGGTGCCTATTTTATAACGGACTGTCTTGCCAGCTTTAACCAGCGGATT  
GATAGGCACCTTGCTTTCAAGTGCTTTATTTAAATCCTCATCAAGACGCTCGTAGTCC  
GCTCCATAAAGGCGTTCAATCGCTTGCCCTAATAGACTCTTTTTCTCGATAATCTCCG  
GTATCTTAGTATCAAATGTGTTACATACACCTATGACCAAGTGATCTTCTTGGTCTGA  
AAATGTCCCCCTTCTTTATCTTGATCTTGGTTTCTGGCGAGGAGTAATCGCATTCAAT  
TGGCCGAGGCCAGGTCAGAATAAAACCAATAATTACAGAAGAACTACGGCCAAGA  
CAAATCCAATTCCTCCTAGCATCTTCGAATGCTCGGGGTAAAAAAGGAGCCATATCC  
TAATGGAAGCGACAATTGTTCCAAGGACCGCAAAACACTTTACAACATAGTGGCGC  
CAGAAGCGCCACGTTTTTCATGTCTTGTATCAACTCATGCATCTGGGCACCTGCGCAT  
TAAAGTCCGAGATCCTCATAAACACTGGCCAAGTAATAGTGAGGCCCTTTGCCCTTG  
TTGGCAGTATATCTTGACACATAGTCATCAAGCGCATACTTGATAATCTTGGGCTGA  
AATGACACAGACATTGTGTAGTAATCGGAATCTAAGAATGGCGGCGGAATAAAATT  
TCGGTCAATTTTTTCGGTCACCGTCCAAATTCGCCACGACTACGGGAAGATCAAATTC

TTTAATTACTTCAACTTCATGCGCCAGAAAAGAAGTGCCATCTCCTCCTTTCTTCTTC  
GCATTGGCACTGCCTAACAAGACAATCTGTTTAGCGTTTTTCAACCGCTCACGTAAA  
TTTCTTTTAATCGTCTCAGGCTTGCTCGTATCCCGAGAAACGAAAAGATCGTGAGCG  
TCGTAAAAGTCAAAATCAATCTTGTCGTTATCCCGCCACGCTTCCATAAGTCGATAA  
AATTTGATGTCCTCACTGGCGAAAGCGACGTAAGTTTTATTCTGTAACTCATGCAA  
ATTTCTTTTTTAGTTCATGGGCCGGAGAAACGACTTGGGATCTGCTCATATAGAACG  
TCGAGAGGACTTAAGTCTCTCGATGGGTCAAATCTTATGGACCAAGCCAGCAATTGA  
TTTTCATTGACTTTTGACAAGTGATTGACATCCAACCTCATGAACCAGTGGCACTGAA  
CCAACCTGATTTCGTTTCGATATCGAATCCATCGCCAAGACTCGACGATCTCTTCTAGCT  
CTTCGAGCCTCAGACAGCTCCCTCTTATGAATAATTTTGGATATCGCTATTTTCAGCAT  
AAATCCAGGGTGATGACGTTTGCGACTTTTCAATCGTTTTTGCTTGGTGTCAGAGACG  
CGGGAGTGGTAAGAAAAACAAGCATTCGCACTTGTTCGATCATCTCACTGATCGCC  
ATAGCCAACATCATGTGCACATGGCTGGTTGAAAGATTTCTCTTCTGATAGTCGTAA  
ATATCCCCGCTCTTCTGCAAGCAATATTTGGTATCTATCTTCTTAAGAAGTGCGTTCAG  
CACTATTCCAACAACAGAATCAATAAATGCGGTGAGCCCGAATTTCTCTTGTAAACC  
AACCTGCCAAGCGGAACGCTTCATTCTCATCGTTATGGGAATGCGATATGAAGACAT  
CAGCCGTTACGGTCGGGAACCATGCCTTGCTAAGAGAGCTTGCATCTAGTTTTCCAT  
CCTCGTTGAGGTAGGTATCTAAGGTGCTACTCACCACAGAGCTTTGTTGCTCTCGAA  
TAATTCTACCTCGCGCAGCGTAAGGGCTTCCGAAAGACTCCGAGAGACTTCCTATCT  
GAAAACCTCGATGCATTTTTTCCCCCTGTTATGGCTCAGCCATCATCACTTGCAAGCA  
ATCTACTACTGAACTGATGTTAACTGAACAGATACGAAATTAGTGTAGAAAAAGTCT  
GATGTCTATAGATCGGCCAATGTGTCTACGGCCCTAGCGGTGAGGGTGCCCTCAGAAG  
CTACAATGGCAGGACACCAACCAGGACAAGCGTCCGGTTCGTGTCTCGGTTTCGAGA  
TCAAGGGGTTAGAGCGGATTCATCCGTCTCCCCCTCTCTCCGCCAGTTTTATGATCCT  
GCAACGCGATTGCCTGGATCCAGGGCCACGCCAGTGGCCACGTCTTATGGTGGCC  
CGTCGGTCCCTCGCGAC

>CONTIG\_19\_length\_12909\_cov\_14.336254

CTACAACCCCAACCGTCGCCACGGTTCAACTGGCGACCTGTCCCCTGTAGAGTTTGA  
ACGGCGCTACGCGCAACGAGGGTCTTGAGTGTCTACGGAACCCTGGGCGTATCATG  
CCGACAAGAACCGCAATCGCACACTGCCTGCCAACCACCTTGATTTTCAAAGATGG  
TGTTACCGCCGCTCTTACCGTCAATGGCTGGCACCAGAACAATACTTACCTCGTCCA  
CCACCCCCGCTGCCATGAAGGCCCCGTTGACCACTCCGCCGCCTTCCAGCAATACCG  
TCTTGGCTCCGAATTCGTTAGCCAATACGTTTAACACATCAGCCGGATTGACTGGAT  
CGCTATCCATAACGACATAAGACACCCTGCGTGCAGCCAGTTCTGCCAAATGGCCAT  
CGTCGACGTCCGGCCCCGACCACCATCAGTAGGTGATCGCCATCTAGCTCTCCAGACT  
CCCAGTGAAGCCTACCCTTTGGGTCGATCACAACGGCCAAGCGCTCCTTGACCCAG  
GCACGCGGTGAATGGGCCGTGTACGGCGGGCTGCGTGATGGGCTCAGCGTTTCCC  
GTCGCAAACGGCTCCATTGTGATGCGACCGACGATGTAGGCCTCGGCATCAAATTCC  
TTCTCGATCTGGTAGTAGAGCCCCGTCCACGTTTCAGGCTCGCCTTCGGCCGGCTGG

CTCCACCTGCTCGGGTCAACGCGACCATCTAGTGGAGAGAGCATATTGCAGATCAC  
ATAGGGTTTCATCCAACTAACCTGTGTAATGAAAGGGGACACAACCAACTCCACAG  
CGTCAGGTATTCAAAGCTCATCTCTCCGAACTTTGAAGTTTTGAGCACCATCAATCA  
CCTCCCTTGCTTTTCGCCAGCATCCCCTGCAAGCGGGACCACCAGTGCAGACATCGC  
AGGACGTTGAGGCTGCTTATTTGTCGCATACCTGTGAGTAGTAAGCGCGTTCCCAA  
CTTGCGCAGCAAGCGATTGCCAGGGAGCTCGACCAACCGATACATCGCCCATGCCG  
CAACCAGGATGAGCACGAAAGTGCCCGCTGCCAACAATGGTGTCTCCCGGAAGTG  
TTTCCGAAGATCTTGATGGCTACGTAGATCACTGGAATGTTGAGCAAATACATCGAG  
AAGCTACATTCCCCACACATCGCGAGCAGCCGATTACCGAGCAAGCGCTTGCTAAA  
ACTTGTATCGAATGAAAACACAAAAATAAACGCACCTGCAAACAGAGCAGGAAGG  
AGATCCAGATAGAACTCACGCTTGGATCCAAAGTCCATGTGAAAGCTGTCAGTCAC  
AACCAGCGCAATCAACACCAGCGCCAACCCCTGCAGGCAGCTGAAAGTTTTCAAGC  
CAACACCAGCGGCAGCATGGCTGCGCACTAAACCGAAGACCACGCCCACGAAAAA  
ATAGTGAATCTTGGAGCCAACAAAGGTTCCCGGCAATGAACCCCGATAAGCTATTA  
GTGTAAAGATCACAACCAGTGCAAGCACCAATGGAGCTGCGTCCCCTCGACTTCCA  
AAGGTCCATAGCGCCAGCCATAGACCCAGGAAGACAATATAGAACTGAACCTCAGG  
AGGAATGCTCCAAAGCGCGGAGACGTTGCCTGAAAATGCAAGATGCCGAGCAAGGT  
TCTGATGCGTGATCGCATAGATGAAATTCGAGTCAACAAGGTTGTAGATCAAGTAG  
GAGATCAAGACGACTGTCAGGTAGGCCGGTGCAATACGTGAGAAACGAGCGACCCC  
GTAGCGAATGGCAGCCGAGTAGTTGAATGGTTTATCGCCATACAAGAACGCCATTA  
AAAATCCGCTCAGGGTGAAAAACACCATGACCCCTATCTCGCCCGGATGCAGGGGA  
CTGATGGCGAAGAACCGATCCTCAGCAAGATGTGCATACACCACCAGCAAAGCGGC  
TATTCCGCGAATGCCGGTGAGTGAATCGATTTCGTTTTTCTTCACTCATAAAAATTATC  
TCCTAGAGAGGCTTGTCGAACGCATCGTCGACACAGAGCCACGCCTCGCCGGCGTA  
AAAAACGCAGATTGTTGGAGGATTCGCACCCATGCGCAGCGGCAGCGGTTGCGGAC  
TCTACAGCAAGAAATTTCGGCCAGTGTGCAATCCGCAAACCTCATGAATTCGCCTCATA  
ACACCTATCGTCGAATTCCGAGATTTGATGGCCTTTGCTGTCTTAGAATTTGCAGTCA  
CAGGTATGTAGATAGGCGCAGCAGCAATTCAGCTTGCCCGAGCATGGAGTTCTTATC  
TCGGCTGTCTTATCTCGACTATTTTCGCAGGCTCGCAACGACAAAGATCTGATGAACT  
GATCGCACCATGTGCTTGAAGCTATTCACCTTCATTGGCATCAGCAGGCGCTGAGCC  
TGAACGATATGGAGGGGCTCGAAGACGGTTACAAAAAGCTGCGTGTTTCATGGCGAC  
CGCGCCCCCGAGACCTTATGCGCGCCCATGACATCGGCGCAGACCTTGGGACAAG  
CTCTCTCGGCGGCGCTGGGCGCACACCACTCCCATCAGCGATCAAATGATGACCAG  
GATCAGGCCGCATGCGCTCAAATAACCCGTTCAACTCACCGAGAGGCGTGATGAAT  
TTCAGAGCCATGAACTTATCGCGCTCGCATTTACCACATTTATTGCCATAACTTTCT  
TGCCAATCTCTCTTCAGGCAAATCAAATGAACGACGCAGGCACCGAAGCACGTTTG  
AAAGCGCTAGAAGACCGCGCTGAACTCAAAGCACTTGTGACACCTTCTCCAACCTT  
GCCGACGGTAAAGAGATAGCCGAGCAAGCCCTCCTCTTCACGCCAGATGCCGAGGT  
CGAGAGCTACTTCGGTGACAGACTGGTTTCAAAGCTTCATGGCAGGGAGGAGATTG  
CAAAAGCCTTTGGCGGTTACCTAAGCCAGTTTGACGTTGTCTATCACATGAACGGGC

AGCAAAC TGTGAGCTGCAGGGAGACCATGCAACGGGCACCTCCTACTGTCTGGTTG  
TGCTCATCGGCACGAGGGACGGCAAGCAGACGCGTGAAACCAGTGGCGTCATCTAC  
CACGATGTTTACGTGCGAACGAATGGTGGCTGGCTCATTTCAAAGAGAACCTCCCGC  
TTCACCTGGCAAGACAGTGAAGTGATCAGTTGAGATTCCTTACACGGAAGAAATGA  
TCGCGCCCTATCTTGAACATCACAACTAGGCACATTGAAGTGCCTAGTTGTTTGGTT  
CGAATGCTGACAATAGATTTACAGGGACCGGCCGTTGGCCTCATCACTGAAGGTAAG  
AAAAGCATGGCAGGCAAGGTTGCAGTGGTCACCGGAGCAAGCCGGGGCCTGGGTGC  
AGGCGTCGCCAGAGCACTTGGCAATGCCGGCTTCAAGGTCTACGTGACAGGCCGCA  
CTAAGGCGGATCTTTACGCAGCGGCAGATGAGGTACGGACGTTGGAGGCAAGGGA  
GTTGCGGTCCTCTGCGATCACGCCGACGACGATCAGGTCAAAGAGCTCTTCGATCAG  
GTCAAGGCCGATGATGGGCGACTCGACATCCTCGTCAACAATGCCACCATCGTTAAC  
GCAGACACCTTGGTTGCACCCGGTGCGTTCTGGGAGAAGTCGCTTGCCCTGGCCGAT  
ACGTTCAACGTCGGGCTTCGCTCTACCTACGTTTCCTCTTACTACGCTGCCCCCTCTCA  
TGATCGCCACCGGGGGAGCTTTGATCGCCAACATCTCCTACTATGGAGCCGTGTCCT  
ATCATTACGGCGCTGCTTATGGTGCAACCAAAGCCGGCACCGACAAGATGAGTTTCG  
ACATGGCTATCGATCTGCGCGAGCACGATGTGGCGTCGGTTTCCATTTGGCCAGGCC  
CGCTCCTTACCGAAGCCGTCAAGTCCATCCCTCCCGAATACATGACTCCTGAACTCG  
CCCTCCAGATCGCTGACTTTGAGAGCCCTGAATTTACCGGACTGGTGATCGAGCGTC  
TGTGGCAAGACCCAGCGCGAATGAAAACTCCGGCCAGAGCCTGATCTCAGCGGAA  
CTGGCCCTTCGCTATGGGATAAAAGACCTGGATGGAAAGCAGCCGAAGCTCTATAT  
CTCGACGCTGGGAAGCCCCGTCAATCGCTTCATAGACTCCTCGACCTAAAGAGACG  
GTCAGCCTGCGCGCCGCGAAGATTGGCGCCGGGGAGATGCGGGGCTTGGCCTGATCG  
GGAGCCGACTCCGCACGTGATCCAGCCTGCCAGTCATCGAACTGGGAACGTGCTTTT  
TCCATGTCATCGCCGTGCGTGCGTGCCCATTCGACGATCGTTTTGATCGGAGCGATG  
AACTTTGTTCCGAGCTCGGTCAATCCATACTCGACACTTCGCCGGGCGTCTGTGAGT  
TTAGTTCTGCTGACAAGTCCGTGCGCTCCAGCGTGCGCAGGGTTAGCGTCAGCATC  
CGTTGGGAAATGTTTTCCAAGCCCTGGCTTCGGCGCACCTCACCAAATCGTTTTCGG  
CCATCTGCCAAGGCAGCCATGACCGACAACTCCAGCGATCGCCGAGTCGAGCCAG  
CACCTCTCGGATCAGATGGCACTCACCTTGTGAATAAGCTGAATTTGACACGGGCAC  
CAAGGTCGATTGTGACGCTTGCCAAAGGATATACCGATGTCATTCGGGTATGCGCAT  
GGTGACGAGCTTTTGCAGACTGATTGATGCGCCACGTTTCATGACCGTTAGCTCCGCA  
GTTGATTCCCTCCCTTCCTGATGGCGCACTAAAGTCGTCGTCTCAGCTCCCTGCCTGCC  
AAGCCGAGTTTTCTGCTCTGTTCTGCTCAGCAACGGGGACCCCAAGTAGGCATCGAG  
GTCGTCATGAAAGGTGAAGTTAACGAGATTGTGGTTGTTCTTGGATCAGGTTCCATT  
GGTCAAGCCATTGCAAGACGAGTCGGTGTTGGAAGGACGGTTCTATTCGACAGACCTT  
GACCAAGAACGCGCCTCTTCGGCAGCCAAGGTGCTGCACGATGCAGGGTATGCAAC  
CGCCACCACAGCCGTGACGTGTCATCTCGCATATCCGTGGAGGCGCTGGTGGAGC  
ATGCTCTTTCACTTGGAGCAATCACGCGTGTCATCCATGCAGCAGGCGTCTACCAT  
CGCAGGCGTCACCATCCGTCATTTTGAAGGTTGACCTGTATGGAACAGCGTTGGTCC  
TGGAAGCATTTGGCAGCGCCATCTCGAAAGGTGGCTCAGCCGTCGTGATCGCATCTC

AATCCGGGCACCGCCTGCCTGCTCTGGATGCTGAGGCCAATAAGGCTTTGGCATTAA  
CGCCTGTGGAGCAGCTGCTGGCCCTTCCCTTCCTGGAGCCGCACAACGTCTTGGATC  
CGCTCCATGCCTACCAATTGGCAAAGCGTGCAAATTCTCTACGGGTGATGGCTGAGG  
CAGTTCGCTGGGGAGCGCGCGGAGCCCGCGTCAATGCCATCAGCCCTGGAATCGTC  
ATCACGCCTCTGGCGAATGACGAGCTCGCTGGCCCTCGCGGCGAGGGTTACCGCCG  
CATGATCAATCACTGCCCCGGCCAAACGTGCAGGCACGCCTGACGAGGTGGCGGGAC  
TGGCAGCGCTGCTGATGGGCGAGGAAGGCTCCTTCATCACCGGGAGTGACTTCCTGA  
TGGATGGCGGTGTGACTGCCTCGTGGTTTTATGGCGATCTTGCCAACTCCTAGACCG  
GGATGCGAAACGCGCGCTTCGCATCTTGAGTCGCCTGAAAGTCCTCGGCCCAACGC  
GAATCTGGCCATGCTCTGCTTGAGCGACAAGAAGCAAGGCGGCATGTGGTTGATGA  
AAATGATTAATAGATCCTAGCGTTCCTTACGGTCTATTTACCTTCGAAAGACCGTAA  
GGTTTCAATGCTCCATCGAACGGGAGTGAGCGTGCTCATCGAGAATGGTTGGCAACT  
GATCGAAATAGGCGGTGTCGACGTCTGGTTCGAAGCCTGCATCAAGTCAGATCGATA  
AATCTGCCTGTCCCGTGCTGCTCTTGGTCTGGCAAGAGCCAACCCAGCTTGATTGGG  
AATGGGAGGTCATGCGTCCTGCCCCAGATACGCATCTTGCTGGGGGACGCTGCTTGA  
CCCGCGAAGAAGCAATGCACGCCGCTTCCGAGGCGTTTTGTTCCACCCCTCTCGCGC  
TGACCCATCCCGACCATCTTATGGACAGCAGGGCGTGGCACGCACTGCTGAGCAGC  
CCGAGCAATGCAGTGCAGTAGCGATGTGTGCTCGAACTGCTCTTCCAATTGCCCATA  
ACGTGAGGCCAACAGATGAAGTTCGAAACTCCAGCGGGCAACAATCCTATCGATCG  
CATGCGCATCGTGGGGCAGCCGCACGACCGCATTGATGGGCCAGCGAAGACGTGCG  
GTGCAGCGCCATACGCTGCCGAGCGCCATGATGTGGCACCTCATCAGGCGCATGGC  
TATGTGTTGGGTGCAAAGATTGCCAAAGGCACCATCCGGTCGATCGATGCCAGCCA  
GGCACGCAAGGCTGCCGGGGTCATCGCCATCGTCACCGCAGAGACTGCCGGCCCCG  
TGTCCAAGGGCAGCTTCATCGATGCCGCGCCGTTAGGCGGACCCGAGGTCCAGCAC  
TACCATCAGGCGGTTGCGGTTGTCGTTGCCGAGACGCTTGAACAGGCACGTGCTGCG  
TCTCACCTGATCCGAGTTGACTATGCCCCGTATGGCCGGCACCTTTGACCTAGAGCTG  
GCGGGACACTCAGCGACCAGACCCGAGCAGATGCAGGACGGCGCGGTAGGCGATTT  
TTACGCAGCGTTTGCTGCTGCGCCTGTCACGGTTGATGCGCGGTATAGCACGCCCCA  
CCAAAGCCACATGATGATGGAGCCACACGCGACCATTGCTGACTGGTCCGATGGCA  
AGCTTTCGATCTGGACATCCGTGCAGACGATCGACTGGGCAAGGCGCGACATTGCA  
GCCACCCTGGGTATCCCGAAGGCCAGCGTCCATGTGAGCTCGCCCTACATTGGAGGC  
GGCTTCGGGGGAAAGGCAACATCAATGTCCGATGCGATCTTGGCTGCGCTGGCCTCA  
AAGGCGGCAGGTCGCCCCGTCAAGGTGGTTCTGACGCGTGAGTTGATGGTCAATAA  
CACGGTGCATCGTCCTGCAACCATTTCAACGGTTGCGTATTGGCGCCGATCGCACTGG  
CCGCATTTTGGCCATCGGCCACGAGACCCTCAACGGCAATCTGCCTGGCGGCTTCGT  
TGAACCCGCGACCATCCAGACGCCTTCGCTCTATGCAGGGGCAAACAGGATGACGG  
CGACCCGCTTGGCGCAGCTCGATTTACCTGAAGGCAGTTCATGAGAGCCCCGGGC  
GAAGCGCCCCGGCATGATGGCGTTGGAAGCCGCGATGGACGAGTTGGCGGTCAAGCT  
TGGAATGGATCCCGTCGAACTTCGCATTCGTAACGATACGCAGGTCGACCCTAGCAA  
TCCCGATCGCCGTTCTCGTCGCGCAAGCTGGTGGAATGCTTGAAGACGGGCGCGG

AGCGTTTTGGATGGGCGAAGCGGCAAGCTCAACCCGGACGCATGCGCGATGGTGAG  
TGGATGGTTGGCATGGGCGTCGCCTCAGCGATACGAGGAGCACGCACGCGCAATTC  
CGGCGCACGCGCCAGATTGGACGCTTCCGGAACCGTCACCATCGAGACAGACATGA  
CGGATATCGGCACCGGCAGTTACACCATCCTTGCGCAGACTGCGGGCTGAAACCATG  
GGTGTACCTTAGAAAAGATCGTCGTTTCGCCTGGGTGATTCTGACTTTCTGTGACC  
GTTGGCTCTGTTGGGCAGCGCGGTGCGGCCAGCACCTCGTCTGCTGTTTTTGCAGCA  
TGTATGAAGCTGCGGGAAGCCGTCACGCAACGCCTTGGATTTCAAGGACTCAACGGCT  
GACTTCTCTGACGGGCATGTCAGCTCGGCAGGACTGCGCGTGCCGCTGCAAGGCGCT  
GCGCGCGACGGCGAGCTGGTTCGTTGAGGACACCATCGAGTTCGGCACAGAGCTGCC  
AAAGAAGCTGGTGCAGGAAACCTTCGGCGCTCACTTTGTTGAGGTCGGCGTGTCATGC  
GGTCACCGGGGAGATACGGGTCCGTCGAATGCTGGCAGTCTGTGCCGCAGGGCGCA  
TCCTCAATCCGAAAACAGCGCGCAGCCAAGTCATTGGCGCGATGACCATGGGGGTT  
GGCGCGGCCTTGACCGAAGAACTGGTGGTCGACAAGCGCCTGGGCTTCTTCGTCAA  
CCATGACCTGGCCAGCTACGAGGTCCCGGTCCACGCGGATATTCCGCACCAGGAGG  
TCATCTTTCTTGACGAAGTTGATGCCACGGTTTCGCCGACCAAGGTGAAGGGTGTGG  
GCGAGCTCGGCCTGTCCGGTGTGGCAGCAGCGGTGGCCAACGCGGTCTACAACGCG  
ACTGGCATCCGTGTTTCGCGACTATCCGATCACGCTTGAGAAAATCTTGCCCGGCTTG  
CCGGCGATCGCTTAGCGGCCCAACCAATTGTCACGCCATGCCCTTCCCGATCCTATT  
GACGTTTCGCCCTGGACCGTGGATCGACACACTCTAGGAAAATCCAATGCCCGAACA  
AAACGACACTGATCTGGCTCGCACACTGATCAGCCGACGCAGAATCCTGGCTGCAG  
GAATGGCGGTTCGCGGCTTGTGGCCTGGTTCCGGCGGCAATCGCCACCCACGGAAG  
CAGATGACGCCCCGCGCCACAGGTGGTCTAGGCACCAGACGTTTGGGCGCTCTTGA  
GGTGTCCGCGCTTGGTTTGGGCGGAATGGTGCTGACGGGCGTCTACGGTCCACCGAA  
GGACCGCAAATCGATGATCAAGCTGGTTCATGCTGCCTTCGACCAGGGCGTCACCAT  
GTTTGACACCGCCGAGGCATACCCCAACGACAATGAAGCCCTGATCGGAGAAGCCA  
TCGCTCCATTCCGAGGAGACGTCAAGGTCGTCACCAAGTTTGGGTGGAACCTTGGTC  
GAGAGCCCAATCGCACGGTGAACAGCCGTCCCGAGGTCATCCGAGCCGTCGCCGAA  
GCGTCCCTCAAAAAGCTCCGCACGGATGTCATCGATCTCTTCTACCAACACCGCGTT  
GATCCTGCGGTGCCCATCGAAGACGTGGCAGGAACCGTGAAAGACCTGATTGCCGA  
AGGCAAGGTGTTGCACTTCGGCATGTCGGAGGCGAGCGCTGCCACCATCCGTCGTG  
CGCATACCGTCCAGCCGGTCAGCGCGGTGCAGAGCGAATACTCTTTGCTCTGGAGA  
GGCCCAGAAGCGGAAGTGCTGCCCCCTGTGCGAGGAGCTTGGCATCGGCTTTGTGCC  
CTTCACACCTTTGGGAGCCGGATTCTTGGCCGGCGCCATCGACGACTCAACGCAATT  
CGGCGGGGATGATTTGCGTAACCGCATTCCTCGACTGATGGAGCCGGCTCGCCACGC  
GAACCTGGCTGTCGTCATGCTGGCTCGGGAATGGGCGCAGCGGAAGGGCGCTACCG  
TCGCGCAGATCTCGCTTGCTTGGTTGATGGCCCAGCGCCCGTGATCGTGCCCATCC  
CTGGCACAACCCAACTCGCGCATTTGAAGGAAAACGTGGGCGCCGCGAGCGGTTTCAG  
TTCACTCCTCTTGAACATCAGAGTTCAACACAGCGCTTTCCAAGATACAGGTCCAA  
GGCGCCCCGCTTTTCGCCTGCCTCCTTAGCACTGACAGGACTCTGAGGTTCCACACTC  
TGCGGCCCCGAGATCCACTTGGAAGATAGCCAACAATAAGGGTCCCCGACGCATGTT

TGTCCCCAAAAAGCGTCTTGGTGGCAGAGACAGGATCAACGATCAATCATTGCCA  
GTGACGCTCTGGCAGCCGTGCGCCTTGGAACGTAATCCCTTGCGCCGCCGTATCAA  
TGGACACCAGATCACTGGAATCCAACACCAGGTCTGCTGCAGCCAAGTTCTCTTCCA  
GCCGATGGAGCTTCGTGGTGCCTGGGATGGGCACGATCCAAGGCCGTTGGGCGAGC  
AACCAAGCCAGCGCAACTTGAGCGGGAGTAGCCCCCTTCCCTGCCGCCACATCCTTT  
AGAAGCTTAACAAGAGCCAAATTGGCCTCCCTCGCAGCAGGAGCGAACCGAGGGAC  
CTGACTACGGTAATCAGTGGAACCGAAGGTGGTCTGTGCATCGATCTTGCCGGTCAA  
AAATCCAGCGCCCAAGGGACTGAAGGGGACGAAGCCGATTCCAAGTTCTTCGCACG  
TGGCAAGAAGCGCTGCTTCCGGCTCGCGCCACCACAGCGAATACTCGCTTTGCAACG  
CCGTCACGGGCTGCACAGCATGAGCCTTTCGGATGGTTCCGACACCTGCTTCGGACA  
GCCCCAAGTGTTTCACTTTCCCTTCGTTCGATCAGCTCCTTGACGGTGCCAGCGACAT  
CTTCGATCGGCACTTCGGGATCGACGCGGTGTTGATACAACAGGTCAATTGTCTCGA  
TGCCGAGCCGCTTGAGGGACGCTTCGGTGACGGCACGAATATGGTCCGGTCGGCTGT  
TGACACCCCCAAGGCGTTTGCCCGTATCGAGGTCAATATTCCAGCCAACTTGGTG  
CGATGACGACATCGTCGCGAATGCCTGAGATGGCTTCGCCAATCAGCACTTCGTTAT  
CGAAGGGACCGTAGGCTTCGGCCGTATCGAGCAGCGTCACTCCACGCTCCACGGCA  
GCTCGAACCAAGGCAATCATTTCTGGCGTTCGGGTGCCGGACCATAACAGGCAGTC  
ATGCTCATGCAGCCCATGCCAATTGCTGATACTTCAAGGCCACTGCGGCCCAAGACT  
CGCTTCTTCATTTTTTCTTCTTCTGATACGGGGGGTGCGGCTTTTCATCAGTGCGT  
GACCGTCGCGCACGGCGCATTGATTGCTGGTCCTAGCCGTGCCCGATGCTTGAGAA  
GCCAGATCGCTCTAACAGTCGAACCCACGCCTCGCTGATGAGCAGAACGGTGCGGC  
TGCATGCGCCGCATACCCGACAAATGCGCGTGTAGCTAAGAGCCGGCCTTTCCAGCC  
CGATGGCCGCACTTCTCGGACACACCTTAGCGCTAGCAAGCCAGGACTAGAACACG  
CTCAGCTGCTATCACTTATTAGGCCCCGTGCATGAGTTGCACAGAACGCAACAACTTT  
CCGCGCAAGCAGCGATTCAAGTCAGTCGTGACGAAGTGCATCAATGAGCAACTTCATT  
CCTGGGGACAGCTGCCGTTGGCTCGAGTAGTAAAGGTGATGCCCCGAAATGGCGG  
ACACCAATCCTTGAGAAGTCGCACCAAGGTCCCGTCTTCCAACCTGGGGCCTCACCTG  
ATCATCAAGCAGATACGCGATGCCGAGCCCCGAAACCGCCGCATCCACGATGAAGT  
CACGATTGTTGAGCACGAGTTGCCCCGTCCACTCTAAGACTCAACTCCTTGCCGTCTTT  
TTCCAAGTCCCACGCAAACAGGTTTCCCATCGTCGGGAATCGGATGTTGATGCAGTT  
GTGCGCGGCGAGATCTTTCGGGACACGCGGGGTTCATGCCGACGGAGATAGGCGC  
GAGACGCGACAACCTGCCATGGTGTAAGGAGGGCCGATCTTGATCGATACCATGCCA  
GGAGCGACGCTTTCTCCAAGCCTTACGCCAGCATCGAAGCGCTCCGCAACGATATCC  
CTCAGCGCGCCGTCCACGCTTAGCTCGACCTTCAGCTGCGGATGATCTCGGCTGAGC  
ACCTTCAGCTTTGGCCAAATGATGGTCTTGCCCGCATGCTCGGAACTCGTGATCCGG  
ATTGCTCCGCCAGGCGTTAGGCGCAAGTCCTCAAGTGAAGTCAAGTGTTGAGTCGATG  
CTGCTCATCAGCGGGCGGACCTTCTCCATCAACCGCTCACAGGCTTCTGTTGGCGTG  
ACCGCGCGCGTCGTTTCGATTGAGAAGGCGAATGCCGAGCTTTGCCTCCAGACGACG  
CACGGTATGGCTGAGGGCAGACTGCGAGATGCCTATCTTTGCGGAAGCCTTCGTGAA  
GCTGCCCTCGTCCGCAATGACCAGCAGAGCGGATAGATCACTGATGTCTTCGCGACG

CATGTCCAGTCCTGGTATTGAAGATTGAAAGGCGTGCCGGCCACCCTTCCGGCAGA  
GGCGACTACTGATAAGACGACCTGGCAATTATAGGTTTTTTATCTTGAACCGGTCGT  
TGCAATCAATTCTTGGGGCAAGCAGCCTCGCGTGCTTCCCCGCCTGCGCATGGAGCC  
CCAATGGGCTATGGATTAACATCCCTTAATCCTGCACTAGTGTCAAGTTCAGGAGAAC  
CCTATGCGCCCGCCATCCAAGCCTTACACACTCAATTATTTTTTCATGGCAAAGCTGA  
TGTATTGACCCGTCGCGAGCAAATCGTTGGATTTAACATGTCAGCAAGCGTTTTCTTG  
AAAATAATATGATTGTAGTGATTGACCCAAGTGCACCGAGCACCTGACTTGGCAAA  
CTCCGTAGCGTCGTGGATGGGTACGGCGGGTCTTACCTGCTTTGGAAGTGAAGCGCA  
CCAGAACGCTCAGCTCCGAGCTTTGACAAAGAGATGCAACACCCTGAAGAGGCACT  
TCACTTACATAGGCGTCGCGCCAGGCGGGATGTCAGGAAGTTCTGAGCCGCGCGTC  
ACTGTCGCCCTACGAAATTGAAACTCAGCTTAGCCAAGGCCGAGCAACTCATTGTTC  
GGCCGGGTCTTCATAGGCACTCCGATTCCAAGACCGGTAGCGCCAAGGCACAACAT  
CCTCAAGGAACGTGATTTCGCGGGCTCGGTAGTGTGCCTAGCGATGCCAAGCTGCTCT  
TCAGGCGCTCCGCGTGAGCCTGCGGCACGAACAGCCAGGGCCTTACGGACCACCCC  
GCTGGCACGCCGCTTTCCCTCACCAACGTTAGCTTCAATCCGGCCCAATGCTGGTCC  
CATGCCCCGACGCCGCCCAAAAGCGATGGCGCCTTTGCCGCGTAGGTGATTTACAC  
AGGTGGCGGCC

>CONTIG\_20\_length\_12808\_cov\_161.138317

GCTGCCCCGCTTGTTGTCTCGATCTACGATCGCCCACTGCGACGACACGTAGGCCGCA  
GCCAGGCCATCCAGTCGGTCGACGGGCCACCGGTGCGATCGGTGCGCGGATCGCT  
GCTATCGATCGCCGGTGCGCGCTGGTTGCAGCTTGGCGCTTGATTGCTGCGCTGCTG  
CTCGGGCTTCCCGAGCGAGCTGCATGACGCGAGCACTAGCAGCGTCAGGCACAGCA  
CCAACAGTCGCGTCTGTCCGTGGCGAATCCACTGCTGCAGGTCGTTGGGTACGGATG  
GATTTCGATCTCACGTGCGGCCTCCTGAGCCTTGGTCGCGGTCTGGATGCCTTCGGCA  
TTGACGCGCATGTTCGATGGCATATTCGATTTTCTGCGTGGCGCGCTCGACTTTTATCG  
TCTCGCGAGCGACGCGCAGGTCGGTCTTGGTGTGGCGTCGCTGCGGCCGTTCCAGT  
AGATACAGCCGCCGATGCTGAGGATCATCAGGACGACCGCGCCGTAAATGATGAGC  
TTGATCTGGGTTCATGGTCGGGGTTCCAAAGTTTCGTCCCAGTACCCCTCATCTATCCA  
CTCCTGGCGCCCTCGGTCATTCGACAACCACCAGCCATCGGATAGTAGATCAGGCTT  
TGCCTCGTACCAGCACCAACGCCCGTTGTTATCTTGGGTAGATAGTTGCCCACTC  
GGGCGCGTCTTTCCAATCTGGTTTCATCGGTGCGCGCTCCTGATCTCGATAGCCAGT  
GCGCGCAGATCAGTCAACTCCGGCGCCTGGCGCATGTTGTGGCGGGACCACCAAAA  
CGCGATGGCTGTATTGTCGATCGCACGGATCGGCGCGGCGAGTCGCTTCGGCCATTT  
GTTTCATGTGGGGCGAGCCACGCGTGTGTGCTGTTTCGGGCTTCCCGTGCGAGGGACCT  
GCTGCAAACAGAAGCACCATTCGAGCAAAATTGAGCCCATGATGACTATTAGATA  
TGTCAGCATCTCGCCTCGCTCGGGCCCTTCGTAAATTTCCAATGGTTCCCGAACTGG  
CGGTGCTTGAATTACGGGTTTGACGGACATCACAGAATCCTTGAAGAGAGTTGGGA  
AACGACAATCAGCAGCTCAACTGTGTAGTAACCAGCCACTACCACGGCGACCACTT  
GGCCTAGGAGCATCACAGCGCGCACCAACGCTGCACGCGGCGACAGCCGACGGATC

GCTTGACGGTTACGCATCGAACGGCTCCATGCCAAGCTGCGTGGCGCACAGGCCGA  
GTGCGGCAAAGCCGAAGACCCAAACGGCAATGACGCAGCCGCACAGGACGACTAG  
AGAATGATCGGTGAGAACTGGAGCATTGTGGGTGTCCGGTTGAGTTGATGTGGGA  
ACTGTAAGTAGATCGAAACAGGTTGTCAACAATAATTTGAACGTGCCGTTCTGCTGCA  
CGCTTCTGCGGCAGCTGATACCAGGGCCGTCGGCGCTCCGGCGGGACGACCTGACC  
CGCTGCGACCAGTTGCCGCACGATGGCTAGAAAGTGCAGCGCGCTTGCGCGCCGCGG  
CCTGCGGAACGCCAAGTGCCTGGCACAGGTCGCCAAGGGTTGCGGGTTGGCGGCCG  
AGTCGTTCTAGGATCTCGGCTTTCATGGTTGCGACTCGCCTGCCGGCTTGGCCTTCTG  
GTCGTCTTCATCATCGTCGTCCATGTCCTGATCGTCGGTGCTGAAGCTGTACGAGAC  
GTTGACCGAAACACGGAAATCAGCTCCACAGTCAGGGCACTCAAGCTCGTGTTTCGC  
CTTCCTCGTACAAGCGCCAGAGCTCGTGAGCTGAGATATCGATCGATTCCCCGCAAT  
GCGGGCACCGGGGCGCCTCGCAACCCCAAGACTCAAGACGGCCAGTGATTCTCTCG  
GAGGCACGAAGCGCAGTAAAGTTGCCGGCCATCATGCACCATCCTTCGCCGCTGCC  
GGCTGGGGGTGAGTGGCGAGTGTGGCGTCTCCGACCACCAGTGTTCTATACAGAGA  
GCCAGCGGACGCCCCGTATTTTGCTTCGTATGCTTTGCCGTTTTCTGATTCTGTGCTGA  
CTGCAACTACGCCAACCACCATGACGTTGTGCAATTGGTATTCCACCACCGGCACA  
GCAGCAGGTGCTGCCGGCTGGGGGTGGGTGGCGAGGGGGACCCTCACCCTTCGTG  
CTTGGCTTTCAATGCATCTTCCTCACCATCGCTGAGCCAGCATCCTTCACCGCTGTAG  
TTCCCTGCGGCTATTGCGACGCTGAGCAGGTCGTCGAGTGCTTCAATCGCATCGCCC  
TGCAACTGTCCAGAATTGCCGGATTGTTTCGTTTATCACGTCACGCATCTGTCTGCTCC  
TTCGTGTGGGCGGCTCGCGCATTCAAGCGCTGCCGGTGTTGCTCGATGTAGTAGCGC  
GCCGCTGCAGCCTTCGCTACGTCGTCCTCGGACAGCTCAAACCGAAGGCCGAGGTCT  
GCCGGCACGTCGTGCTGATCGGCGTGCGTGATGGGTTGCCAGGTGTTTCATCAATTTA  
CCTAAATCGGATCATACTAGTTTCGGCAGAGTAGGGTCGCACAACCCATTTATCGC  
AAAGCTCCTTATCGTATATATAAACGCGGCCTGTAACATTTTCAACAGCAATATGCT  
GTTCCGTCTCTTCAACCGAGTAAACTGGATCTACCCAGTCTCGCCGCCCGTCTTTAA  
ACTCCACAACAAATTCACGATGGTTATCTACTTCACCTAGCAAGTTCATACTGCGCC  
TCGGGCTTTAGAGAGTGCTACGGAGTCGTTACACGATGTCAAGGTCGAATAACGAC  
GTTGTATGATCCGCCATCGTCGGGTGGTGTGCGGGTGCTGGCGCAACTGCGTTGCGGC  
CTTCTCGGTGTAGCCGATCGACGCGCACACCGCGGTCAGCGTCTTGTGCGGCACGCT  
GCCAGGAGCTGGCTCCGTCTGCGGCGTGGGGCGGCCCGTGAGCTGCGACATCAGCA  
CCGGGTAGCCGTCCGCGTCTGCGGTGCGGATGACTGCTTGGCGGCGTTCCAGGCAAT  
CGAAGCCGACTAGGAAGTACGCCCAGTTGCCCCACTGGTTGTTTCAGCGCCGAGCGTT  
CCCACACCGTGACGGTGTTGCCGTCGACCTGCATCGACGGCTTGTCACCTGCACAT  
CGCCGCTGACGCCGTGCCAGCCCAGCTCGCCTAAGCTCTGGCGCACCGTCTGTGCTT  
GGGCCGGCGCGGTGTAGATGCACACGGCCAGGATGGCCAGCATGACGAGGACGAT  
GTTCCGATAGATTTTCATGCCTTGGAATCCGGATTGGTGCGAATGGCGGCCAGCGCG  
TAGCCGGCGCCGTCTAACAGCTCCTCGACCATATGCTGTAGCCACTGTTTCGTGCGTC  
AGGTCAGTTCGGTTCGAGGGTCGCGCCGTAATTTGGCGCGGCCCGGCTGGTCGCGCGC  
GATCAACAGATCGATTAGGCGCTGTGTGGTGGCCGACACTATAGGGCTTGAGATCA

AGCGCCGTACATTTTCGTATTGAGTACAAATTACTAGGCGGCTCGACACTGGAGTACT  
CAGTCTTCCATGTCGCATCGGCTTGTAACACGTGCGACGCCCAATGGTCTTGATTCAT  
TCCTGAGCTCCTGATGGCAGATAGTCGCGCGTCGCCGGGTTGAGGCGGAACACCTC  
GCGCAACACGTCTAGGTGTAGGACTTTTCGGACGGCCAGGCCTTTCCGATAAACGG  
CACGACGCCAGTCGGACGGCGCATAGCGCGCGCTGCGAGGCTGCATTCGCGGCCCA  
GCTTGGACAGCGTTCCACGGTCGAGTGCAGGCAGCCCTGGCAAGTACTGGATCGCTT  
CGACGACGGTCATCAGCGGCTCGTTGTTGGTGTGTTGGGCGTTTCGGGGATCGTGTTCA  
TTGAATCCTCTCCCACAGCTCGCCGTCATCGTCGCGGACGGTCTGCCCCGACGTCCAT  
CTCGTCGAGCTTGTTGAACGCCGTCGGGTCGTCGAACGCGGTCAGCATGACGTGTCT  
TATGTCTGACGGTGCTTCGCACCATTTGGTCTTGAAGAGTTTCATTGTCTGCGTCTCA  
GTGAGTGGGTGTGGGTGTGGGTGTGGTTCGGCGCTCAGCGCCAGTAAGTGACGCCAT  
CATTACAGGTGTAGGCCGTCTTGTCAGGGGTTCGAGGCGACGATTACAGAGCCATTGC  
TACTGGTCCCGCTAACCACGTTCGCCAGACATACGACCTGTCACTTTGCAGTCGTGCG  
CGGCTGCGAACTCGGCCCATCGCGCTTCTTCGGCATAACATGCCGTTAATGCACAACG  
CGATCAAACCTACTAGTGCGGCGGCCAGCAGAACGGCGACTACCGCAGGTGCGATG  
TTGTATAAAAAGTTTTTCACGTCTGCGTCTCAGTGAGTGGGTGTGGGATTAGAATCC  
CACACCGTTACACAGTTGTCAACTACTTGTTCAGGAATTATCGCGCGAGTTTGCCA  
AACGGGGCCGGAGATCACATTTCCGTCTTCTCGCCGCTCGTCAGTCATGGCGATCCAA  
TCGGCTGGGGGGCCGGTACATCCGACAGCCTCTGGCATTCTGCGCCTGCGTCCAGTTG  
CGCGTCTTGAGCCAGGCCGACACAGCGCGCGCGTTCGTAGCGGCGTCCAGACGGCGA  
GGCGTCCAGCGCGGTCCGAATGGCCAGCGAGTCGGCAGTGCCCGCCTCGCCACGA  
GCTTGGTGAGGATCGGCGGCAGTAGGTCGTGAGGTCCGACTTCACCGTGCCGATGC  
CCTGGCGCATGTTGCTCGCGTTGTATGCCTTGACCAGCTCGGGCACGGAGCGCACCA  
ACTTGGTGTACTCGGCCATCGTGCCGCAGAATCGCGCTTTGGCCTCGGCCAGGATCT  
GCGGCAGCTCCGACACCCAGCCCAGAGGCAAAGGTTCTCGCACATCACCGGCATG  
AACCGGCTGTTGCCTGTCTCGTCGTGGTTGAGCTCGTGCTTGTTGGCCGTACCGAAC  
AGTGCGAACC GGCGTGGGTGCGACTCTTCGCGCTTGCCGTACGGCGTGCGGTAGAC  
GTCCTGCGTGTCGGTCGTCCATCGTTTTACCTCCTCAGCGTCGCGCTTACGCAGGCCG  
GACATTTTCGGCTAGCTCGGCCACCGGGCCGCGCGCTGCCGCCATCGACATCTTGCGT  
TCATCCGGAGTGAACGCGATCTCGGCCGGCGGTGGCCAGCCCATCGCCTCGCACAG  
CGTGACGCCGAACAAGCCCTTACCCAGGCGCTGATCGCCGATCAGCACCGGCACCA  
CCGGGCACGGGGCGCCGGGGCGTAGCTGACGCATCACGATGCCAGCGAAGAAGAG  
CTGCGCAGCACCGGTCAGCGCTTCGCTGCCGGGTGCGGCATAGAGGTCGGTAAACA  
GCGTATCCAGGCGTGGACGTTTGTCCCACACCGGTAGCGCTAGGATCGAGTCTTTCC  
ACGGGTCGATCGGGTTGCTGCGCGCCACAGTGTCCAGGGCTGTGTCCAGCGAGCCA  
GGAGAGACGTTGGACGCGCCCAGGCGCGTACCGCGTCGAGCCACATGCCAGGCGC  
TGGGGCGTCTGTGTCAACGTGCGTCTCGGCGCAGACGTCGTAGGCTAAGGTGATGCC  
AGCCTCACGTGCCAGCAGCTTCACGGCGAATATCAGATTCACCACGCTCGCGCGTTT  
CTTGTCCGCGCGGTCTGGCCACTCCTCGATCGTGCCGCATAGGCGCTCGGCGGCCAG  
CTCTAGCGGGTGTGACAGTTCCGTCGCGTCGCTGTGCGCGAACGCGAAGAAGTCTGCC

CAACTTGTGTGACCACACGCCAGGCTTGCCGCGCATCGTACACACCTCGCCGGCGCG  
CAGGTCGCCCAGCGACAGGTCGTGCCGCGTGGAGTCGAACGGATCGGCGCAGCGCC  
GGCCCATCACCACATCTAGCGCGCTAAGGGCGTCGCGCACTGTGCCGCGTTGCTGTT  
CGCCGTCTGAACCTCGAACACCAGCGGCCAGGACGGTGGGAGCACCTTGTCGCCGAGT  
GCGCGCAGCGCCAGGACGCCCAGCAGTTCGCCGTCTTCGCGGGCCCGCGGCCAGCGC  
GTTAGCGCGGTGATAGTCAAGCGCGACGCGCTTGGCCTCTACGCGCTTGGCATTCTT  
GGCGTTACGTACGCCGGTCTCGAAACGGCGGCGGTTCGATCTCTTTGATCGGCGGCAT  
CTCCTGCACGTCTATCCAGCCTTCGTTAGTGCGGTATTTGGCGGGGCGGCCGGCTAT  
ATCCGTGGCGCGCTCTAGCCACGCGTCTTCGGCGGGTACGACACGCTCTACGCCTTC  
ACCAAGTACAGGAGCGGCTTCGAACATTAGGCGCGACGGCTGATACATCGACGCAT  
CGGACAGCTGACGCGTCAGCAGCGCTCCCGACTTGGAGATGATGACCCGACCAACC  
CCTTTAGCCCACTGATCGATCTGCAATCGTTCGGCGAGCGCTGGGATGTCTGTGCCG  
CGCGTCACCGCGAGATAGATGTGTACGCCGCGCAGGCCCTTGCCGCCAACGTAGGA  
CGAGGCAGACGGCCGGGCGACGCGTAGTGCTTGGCGCAGCCACGGTGAGGCGGCTT  
CCAGCGCGTCCATCACCTCGCCGACGGTGCGATAGATGCCTGCCTCGGTGTCCACGT  
CGATGACGAACAGCGATGGCGAGTCGAGGTAGCGGAACGTTTCGTTGGTGCGAGCG  
ACCGCGTCCGGGTTGAACTCCGAGCCGCGGCGCGTGGTCAGCGGCGAATCGCCGAC  
GTTTGGTACACCGGCGGTGATGGCTTGCTGCGCGGTCAGCAGCTCGAGAACGTTCGCG  
CAGCTCTGGCAGGTTGGGGACGGTCATGACCTTGGCCAGTCCTGAGGTCATGTGGGC  
GATGGCCGAGCCGGTCGGCTTGCCATCTTTCAGGACGTAGGACTTAGCGAGCTCGCA  
AGAGGTCGATGTGATCAGCGTGAATCGAATGGGTTCCATGAGCCTTGTCTGTGTGGG  
TGCTCGGACGATCAGTTTGCGCGGTTCAGCGAATGCTTTGTCCAGCAGCCAGAGCGTG  
AACGGGCCGCTCTTGCGGCGTGCGACGCGGAGATTGCCGAGCATGTGGCCGAGGCG  
CACCGCCTCGCTGCGCGAAGGCACGCGTCCGACGATAGCGCTAAATAGGTTGGCGG  
CTATGTACTCCCCGGGGAAAGTGCGGGCGCGCTCCCGAAGCTGATCAAGGGAGATC  
AGTACAGGCGGGCGCTCGGTGACTTGTAGGAACTTCCCGCCGCGCTCCCGATTGAAC  
TCTGCAGCCAGGACTGCTGCGTCTGCGAACGATACATCTACGTTGGTCATTGTGTGG  
GCCTCGTGTGGTTGGGTTGGACGTTGATGGGTTAGGCCGGTGCAACGTGCCAATAGA  
TTGCGCTGCCGTTGCGCGTGACGTGCACGTTGTGCATGCGCAGCAATGCCGCCAAAT  
GTTTCGCGCTCTGCCCCTGTTGGGCTGCAGTGGCGCAAAAGTCTGTGCAGCCGGTGTG  
TGGTGTATAGACCGGGGCATTCCTCGGCAATGCGCAACACTTCCGTGATGGATATCT  
CGCCACTTAGGGTGGTCATCATGTGGGCCTGCGTGTGGATGAGCGTCGACTGTAGCG  
AAACGTTTTACTTCTGTCAACACTCTCAATTGTTAAATCTGTGTGAGTACTCGGTTAC  
AAGGCTAAAAAGTAAAACTAAAAGTACAAGGAGAAGTCAAAAACAAGAAAATAT  
TTTGTATTCTTTATATTTCTTGTTTTAGCGCTATAGGAGGGTTGTTGGGTTGATTTTA  
CAGATGGTATCGTCTGAAACTAATCGCGCAATGGACGCGGCTACGGCCTTGGCGTAT  
CGTTACGCACATGGCAAACGACACGCTCGCATTGCAGGTAGCAGGCTGGGATCTCG  
ATCTAGACGATCGTGGCAATCTGCGCACGTTTCGGAGACGCAACCCCAGGCGACAAC  
ACAGGGCCCCGGCATGCGGCTCGCTCAGGACGTGCGGTCCCGCGTTCGAGCCTGGCG  
CGGCGAAGTGTGGTTCGACACCGAGCAAGGGATCGACTATCCGCGCTACTTGGGCA

CCACGCCGTCGCTGGTCGAGCTTCGGGCCGACTACCAGGCCGAGGCGCTTCGCGTAC  
CGCAGTGCGCGACCGCACTTGCCGACTTCGCCCTTGGTGCGCGACCGCGCTGTCA  
CCGGTGCGCTGTACCTATCCGACCTGTCTGGCTACGCCGCCGAGGTTGCCCTATGAC  
GCTGCGCACGATCCCGGTGCGACCTACGCCCAACCAGTCGCTGTCTGTGGTGCTGCA  
AGATCGCAACGTCTCTGTGACGCTGCGGACGCTGCAAGGCGCCATGTACGCCGACG  
TCCTGTGCGACGGCGTACCGGTCTGCACGGGGCGCGCCTGCGTCGATCGCCAGTCGC  
TCACTGCGCGCGCGAGTTACGTGCGCTTCCCCGAGCTGGTGCTGTGCTTCGCCGACT  
TGCAGGGCGCAAATGATCCCCAATGGGCGGAACTGGGCACACGTTACGTGCTGCTG  
AGCGTCGAACCTGACGACACGTCAACGGACGCGACTGCAAACGCCACTCCGGTAGA  
GTCCGATTTGTTCTACTCCGGAACCTGTGACGTACAACGGAAACCACATTTTCACAGG  
CATTTCTCGCTGATTCGGAAAGCCGCCGTTTAACCAGTTTGTGCCACGATGACGAGG  
CATTAAACGACACAGCGGACCGTGCAGTGACCAACATCCCGATTACGCCTGCCGCCT  
GGCCTGAGATTCCGTTGATCGTCGAGACCGACCCGGTGCTCGGTGGTCTCAACGGTC  
CGGCAAATCGACAAGCGATTGCCATCTCGCAGCGTATTCAGTACGCCATGGCTGCG  
GTCGATATGGTGCGCCGGCGTCGGCACTCAGGCGAAGGCACTGGCCGATCAGGCCCT  
AGGCCTGGCAAGTAGCGCCGATGCCGTGCGATTGGCCGCGCAATCCGCTGCGGCGA  
CCGCCGATACGAAGGCGAGCACCGCACAAACCACCGCAACGCAGGCTGACACTAAG  
GCTACCAGCGCGCAGACAACTGCGACCGCCGCAGATACGAAGGCGACACAGGCCG  
ACACGAAGGCGACCGCGGCGCAGACGACTGCAGCAACTGCCGCGACCGACGCGCA  
GACCGCAATGACGACGGCCGCAGCAAAGACGACCCGCGTGTTCCCTCGGCACGATCA  
GTATCACCTACACCGCTGCGCTCGCCCTAGGCGCTGGCGCCCGTAGTGTCGAGGCGA  
CATGCACTGGTGCGCGCGTCGGCGATGCGATCTTCGTGTCGCCCTCGGCGGCCGTGC  
CGGACGGTTATGCCGTGCGCTCGGCGCAGTGTCTGACCGCGGACAAGATTGCGGTGT  
CGATCGTACACCCGGCTCTCGTGCTCGGCGCAAACCTCACGATTCCGGTGCTGGCGT  
TTGCGTTGCGGTAATTGTTGACACGTAGCAACGGCCGTGGCAGTCTTCACTTGCCCG  
GTGTTGTCTGCGCCTGGTGGGTTGGCGGGTCGGGGCGTTGTGGGCGCCTCGGCCCGT  
TTTTATTTGGAAACCCATGCTCAAGTCTGCGATTTTCCAGTCTCAAGGCCGCAACGA  
CTTTGCGACCCTGACCGAACTTCCCGCGCTCGTCGCTGACCGCTATGCCCGTGCGGC  
GCTCGCGGCTGTGCGCGCGCCAGTCTCAGGCGGCGTTGTCAGTCTCGCGCTCGAACA  
CGTCCAGTCGGTGCTTCAACTCGGCGAGCCTGCCATCGAGCTGCTGCAGCCTTTCGT  
GCAAACCGACAAGCCGATCCACGGCTGGCGCAACGTCTTGGCTGCGCAACAGGCTG  
CACTTGCGTTGCATGTTGGGTTTCTGATCGGCCGGCCGCATCTTGAGATCCCCGTCA  
GCATGCATGCCC GCGGATCGAGACCGGCGCCGGCGAGCTGGCTGTGCACTTCTGTT  
CGCCGTGATTGCCACCGTGCTACACTCAGGGCGCGCCAGCTATCGGGAGTTAGAG  
ACCGTACTGAGCACCGAAGACGTGTTCAACTTGGTTGAGCTGATCAACGTCGAACGC  
ATTCTGGACTGGCGCGCCCAACCAATCCGCAGGAAACCCACAATGAACGACGCACTA  
GACGACTCCCTGGACATCACCGCAACTGCCGGGCGTGACAATGGCAAGGTCTTCCG  
CATTCAAGGAAGTCAACCCGATCGAGATGAGCGGCTTTATGTTGCGTCTACTTGCTGC  
GCTGCGTGCAAGCAATGTCGATGCGCTGCTCGGCTTCGTACCCCCGCCACAGACGA  
TGACACCGATCCTGCGCTCGGCAACATCTTGCGTATGCTGATGGGCTGCGATCCGGA

TGCTGTGCACACCTTGGTGAAGGACGCGCTGCAGTACGTCAAAGTGAACCGTGATCC  
GAAGCACCCCAATGCGTTCTTCCCGGTGACCGTCTCCGACATCAAAGAACTCGCCAC  
GCTTGGCCAGGTGCTGGGTGCATTCGGCCGTCTGAACATTCTGCCGCGCGAGTGACC  
TCATGGCGCTGACGCTACCATCGATTCCGTCGCTGCCGTCCATCTCGCTGCCCAAGG  
TTACTTCGTTTCGCGAAGAGTCCGGCCGCGGTGTTGAACGGCATCTCGGTGTTGGCTA  
GCAACCTGCCCAAGCTCAACCCGCGCACGCCGATTTACGCAATCGTCAACGCAGAG  
ACGTTCAATTCGCTGGCCTTGCCGGACTCGTGGCAAGAAGTGACGCCGCGGTTGGCC  
GAATATCAAGTCGCCGACTACCTATCGAGGATGGCGCGTTCCTGGCGTACAACAAG  
GTGCGTCGACCGATGAGCGTCGAGGCTGTCCTCATCAAAGAAGGCTCGGATCTGGC  
ACGCGCGACGTGGCTAGAGGCGATCCGGCAGCAGCTGGCCGTCGATCCCCAGGCGC  
GCTACAACGTCATCACGCCGAACGGCCTGTTCAACAGCATGACCATCACGCGTCTGG  
ATTTTCAGACGCGCCAGGATAAGGGCAGCAACCTGCTCTACTTGAACATGCAGTTAA  
GCGAGGTGCTGCAGATCGTCGCGCCGTCCATGCTGGGCGCGAATGTCGTGTCAGCC  
GAATCTGGCCCGCTAGCTGCGGTGCGCCGGGTCTTCTCGTCCATCACTGACACTGCA  
ACCGCAGCCCTTGCTCGTGCACGCGCTCCGGTCAACTCCGCTCTGACGCTCTTCGGG  
ACCAACTGACATGGCAGAAGCAAGCGTTATTGACGAGCTCGTCGTAAAGCTGACGC  
TGGATGCGGAAGCCTACACGCGTGCGCACGGTCAGATTGACATCAACATCAATCAG  
ACCGAGAAGAACTAGCGGACAACGCCCGCAAGACGGATCGCCGCGACAAAGACC  
AGCAGAAGCGACTGAAAGACGTGCGAGCCGGGGTTCGTACGTTTGCCGCAACGGTC  
GCCTCTGCGGTCACAATCGTTGCAGGGCTGGGCGTGACCGTCGGCGCTACCCTTGGC  
AACTTCCTAGGCTTCGAAACCGCGCTGCGGCGCCAGGCCGTGGGTACGGGTTTCTCG  
AACCGTGAGATGCAGGCCTGGAGCGCCTCGGCGCGCCGCCTCGGCGCGGATGCAAA  
CGCGGGCGCCGAGGCGATCGCTAACCTTGCTCGGAACAGAAGACCGGCATTCTGA  
CCGGCAACGCGCCGACGCTGCAGGCGCTCGCGCGCATCGGCGTCAACGCGAACCCG  
AATACGCCCCTGTCAGGACGTGCTCGCGCAAGCGCAGAGCATCTACCGGGCCGCGCC  
CAAGGGACAGCAGGAGCAAATCGAATCGACGCTTGTCGCCTCGGGTGTCTCTGGCG  
ACTTGATCTTGATGATCAAGTCGGAGCTGGACGCGCGCGAGGTGTTTGCGCGCTCGT  
TCTCTCAGGCCGCCGAAGAGAATCGCAAGGCGCTGGATCAACTGGCCGACGCCTTC  
GAGTCGATCAAAGCCACGGCGATCACCGTCAGTGCGACGTTGCTAGAGGCCTTACA  
GCCGGCAATCGCGGCGGGCGCCATCAAGCTGTCTGAGTTTGCCACGGACGTTGCCA  
AGTTCAGCCGTGACGTACAGGCGGCAGGCGGTGGCGTGGACGGGTTCGTCGACACC  
CTGCGCAAGCGGTCCGTCGTGTTTCGACAACCTTAGCGAAGGGCATCGATGAGGCAGG  
CAAGCAGATCAACGCTGTGGTGTCACTGATCAAGTTCGCCCTGAACGCGGTCCCGGC  
GTGGATCACCCAGCAGTATCGCAACGTCAGCAACCTCGGCACGCCGCAAGAGGCCG  
CTGCACAGAATCGTGCCGAACAGCGGATCGCCAAAGACCTATCGAACATCGGCAAC  
GCGGTCAGCGACGCAGCGAGCAAGGCGGCTAAGCGCGCCTCGGGCTGGTGGGACA  
GCGTGCTAGAAACTGCGGGCCGGTCGACCGACAAAAATCCGTATGGCCTGCCGCGAG  
AACATCGAAGACGCTCCGGCAGACAATCCCTACGGACTGCCCCGAGAACATCGAAGA  
AAACGCGCCGAAACGGCGGCCAACGGCGGCCAATCCGGTTACAGCCGATGCACAGA  
TGGTGATGACCAAGCTGATCACCAAGCACGGTCTGTATCGGCAGACGCCGCGGCC

GTCGTCGCTAACTGGCAGCGTGAGTCAGGCCTGCGCACCGATGCTGTCAACCCAGC  
AGGCGGCGGCACTGGTGCGCGCGGCATCGGTCAAGTGGCGCGGCGAGCGCACTGAGG  
CGTTCGAACGCCGTTACGGTGTCAAGCCGGATCGAGCGACACTCGATCAGCAGGTC  
GAGTTTGCATGACAGACCCATACGAAAAAGCGTTGATGACCAAGTCGCTGGCTGC  
CGGTGGCGACGCCGCGACCAAGGGCCGTGCCGTCTCGCAGTACTACGAAGCGCACG  
GTAACGTCGCCGAGGACATCCG

>CONTIG\_21\_length\_12548\_cov\_4.713469

CATGCTGGCCACCTGCGACAACTCGCTGGAAGGCCTGCGTGACCGTGCCCTGCTCTG  
CTTCGGGTTTGCCAGTGGCGGGCGCCGGCGCAGCGAGATCGCGGCCGCGGACATGC  
GCGATCTGCGCAAGGTCGGCGAGGACGGCTACATCTATCGGCTGGAGTACTCGAAG  
ACCCAGCAGGCCGGGGTGACGGCGGACTCGAGCCCAGACAAGCCGATCCTGGGACG  
CAGCGCCGACGCGCTCACCGCCTGGCTGGAGGCGGGCGGGGATCCATGAGGGGGCGA  
TTTTCCGGCGGGTCTGGAAGGGGCGGGTTCGGCCCTGCCCTGCTCCCCGGGTCAAGTGG  
CTACCATCGTGAAGCGCCGGGCTCACTTGGCGGGCTTGGCGGGGGATTTTGGGGCAC  
ACAGCCTGCGGTGCGGGTTCTGTGACCGAGGCGGGAAAGCAAGGCGTGCCGCTGCCC  
GCAGTGATGGCGATGACCGAGCACCGGTTCGGTGGCGAGCGTGATTGGGTATTTTCA  
GTCGGGCGCGGCAGAGGATAATCCTGCTGGTCGTCTCTTGAAGTAGAAATTAGCCGC  
CGTATGACTCAAAGTCACTAAGGGGATAAGGCATTGCAATGCCTGTTAGGAAAGCT  
GGGACTGTAGGGGAAGGATAGGCTGCAGCCGCTTGCTCAGGTTGGCACCAATCAGG  
GGAGTCATGAACATCCGGCCGTTTTTCAGTACAAGCTCACGCGATTTGGAGAAGCTT  
CTCAAGGACTCCATCTCGCGTTGCGACACGGCTACGTTAAAAGCTCTTGAGCACGAG  
CTTTCACACCGAAAAACCGAACTGGCTAGACAGCTTGCGCTCAAAGTGCAGAAGCA  
CCTCCGTGATCAAGGTCCGGAGAATGCTCCCGTCATGCCGAACGAAGCCTTGTCACC  
ACCAGCCCCGCCCTGACCGAAGTAGGTGCTGGCCTGCGTCCGACGGCGCCGACGT  
CAGAAGTTATCGATACTCAAGTTGCCAAGACCATGACCGATCCGAACATCATCGATC  
GCTTGAAGGGCCTGCTGGCCTATGTTGTACAAACCGCCAAGTTGAAGGGAACGCCA  
CCGCGGACTGTGGAGCAGCATGGATCCTTCAAGGCCTATGAACACGAACCTCAGGGG  
CCTTCCAGGCATCGAATTTGACAAAGGTTTCGGCAGAGGACGATGTCTGGCTGCGCGT  
GGAGCGCTTGCATGAAAGCGCCCCCTCCGGTTCCAAAGACCAAGCTCCTGGCGGCTCT  
AATCTTGCAGTCTAAGAACCCGGCTAGTGAGCCGGGCACCGTATCAGTTGTTGACCG  
CAAGACCGTTGAGGACCTCGGAATTGATCCGCCCCGACCCAGCGGACCAAGCGAAGC  
CTATCTCGGTGCACACCTTACCGATCAAGGCACAGCTCGACGCAGAGCTAGCGACCT  
ATGTAGCCCAGATCTGGCGGCCGTGGGCAGACGCCGAGAAGGAAGTCCGAAAGAC  
GATTTCCAAGTATGCCTCCTTGTTCGCAGCCCACCAGATGCTGCAGGGGAACCTTGT  
GGACTCGCCCCTAGAACTGGTGATGGGAATAGGTCATGCCGTATGGGAGCGCCCTG  
GAGGCAAGATCACCTACCCACTGATTACCAAACCTGGTGGAGCTGTCCGTCGTCGAAT  
CGACGCACGCCATCGAAGTCCGTCCGCGCTCACCTGATCCGCGTCTGGAACCTGGATA  
TCTACACGTCTATGGACAACCTCGGTGTGTCCGAGGTGGCACGTGCTGGAAAGCAGT  
TCTTTTCCAGCATGGCCGATCAGTTCAGCCCTTTCGTTTTTCAGCACTTTCGAGCCCCT

GTTGAAGAGTGCAGCGAGCCTCTTGGACCCCAACGGCATCTATTGGCCGGATCAGA  
CCACCCCCGATGATCGCCAGCTACCCAAAGCCGACGAGAACCTGAAGATTACTGAC  
ACATGGGCGCTGTTTCGCGCGAGCGCGCACCTCAAGTCTTTTCATTTCAGGACTTGGAA  
CGTTTCGAGAACTGATTGAGGATGGTCTGAACCTGGGGACGCTCTCCCCCGCCACA  
TTGGCCCTGGTTGCCAACCCATCTGTCGACAGCCAGGACCAGACACCGGTCATCTAC  
CGGGGTCTATCGAATATCGATCCGAACGCTTGCACCGAAGTTAAGGCGAAGGACCT  
CTACTTTCCGATGCCCTATAACGACGAGCAGGTCCAGATCGTACAAATGCTGGATCA  
CCATGATGGCGTTGTAGTCCAAGGACCTCCCGGCACCGGCAAGACCCACACGATCG  
CCAACGTAATTTTCGCACTATCTTGCCTCCGGCAAGCGGGTCCTGGTCACGTCGATGA  
GGGATCCGGCGCTAGCCGTACTACAGGAGAAGCTCCCGGAAGAGATCCGCCCCCTTA  
GCCATCAGTCTGCTCAGCAGCGAAGCTGAAGGAATGAAGCAGTTCGAGCACTCGAT  
TCGAAAGATTTTCGGCCGAAGTATCCCGGATCAATCGAGTAGAACTCCGGCGCGAAG  
TCACGCAGCTTGAGCAGCGTATCGACCAACTTCACGCGCACATCGCCAAGACCGAG  
CAGGAAATCGCTCGCTGGGCGAACAAGAACCTTGAGCCCATCCAGCTCGACGGCCA  
GAAGCTCATGCCGCTAGACGTGGCCACGAGGTTAGCCGCTCATCCAGACGAGGCAG  
CATGGATTCTGACGCGCTGACCATTGAAGCAATGCATGCGCCTGCGTTTGGCGATG  
CCGAAATCGTGGCACTGCGGGATGCGCGCAGCGCCCTGGGCCAGGACCTGGCTCTA  
CTCGACCAGACCCTTCCAGCACTGGACTCATTCCCACCGACGGAGCGGTTGCTGCAA  
CTTACCAGGACATGAAGCAGCTGGCCACCTTGAATGCCATGGTTGAGTCGGCGAC  
CTTGCCGCCCCCTCCGAGACATGGACGCTGCGACGATCGATGCGGCAATCGAAGCAA  
GGAGCCAAGTTGTAGGACTCCAGAGTTCACGTAGGAACCTCGACGAACACGGGTAT  
GCATGGTTACCCGAGCTCGAGTCTTTCCCTTCGAAGGACCGCCAACAAGGATGTGCTG  
CTTACGGTGTTTCAAACGCTGAGGTCCGACATCCTCAGCCTGGTCGGTAGCCGCACC  
CAGTTCCTGTGCGGCCCCGGTACTCCTGCCTGAAGACTTCATGGAAAGCCCTGAGCTG  
GCAGATGCTGTTGATAACCTGTACAGGGGAAGAAGGCATTTCGGTTTCGCCGGCAT  
GTTTGGGAAGTCAGTGCAGAAGAAGCTTCTTGACCAGGTTTCAGGTGGTTGGCAGAG  
CCCCGACCAGCGACGAGGACTGGAATCACGTACTTCTGTTTGTGCGTTTTTCGTCAGG  
ATTGCTCATCTATGTTGGTTCGCTGGAACGCAGTCGCACCGGATCTGCATCTGCCCA  
ATCTATCGAAGGCGGAAGAGGTCATCTCCAAGGCGCCCCGGCTTCTTGTCCGCGTTTCG  
ATTCGCTCCAAAAGATACTGCGCGAAGAGAAGACCTCTCCTCCAGCCTCCCCGCGC  
TCCTTCCCCGCTTGGCCCCATTCGGGACAAACACCTTATGAGTCCGCGAAGCTTGAAA  
AGGCACTTGAGATTCTCGATCACAACTGAGTCGCAACAGGCTGGCGTCCACGTGG  
CAGATGAGAGAGACCTTCTATCGAGCGATCGCAGATTGCCAGAGCAACATTACGCA  
GCGAATTTCTAGGTTCTTCGATCAACAGCTGGGCGATTTCGCACGTTCAAGACACAGA  
GATTACGGCCCAATGGTCCGAGCTGATGGCCGAGCTTCGACGTCAGCACAGCCAGT  
TCCCTCACCTTCATACAGTCGTTTTCTTAACCGACAAGATCAAGGAATCGGGCGCGC  
CACGATGGGCCAAGCGGTTGCGCACTGAGGCAGTTACCTCAGCGCATGACGACCTA  
TTGCCTGACAACTGGCGATCGCTGTGGCGCAGACGTCGCCTGCTGACCCTGGTGGAA  
TCCATGGATGGACGGGAGACGTTGAAGCAACTTTCACAGAAGCGCGCCGAAATGGA  
GTCGGACCTTGCCCGTCTCTATCAAGCCACGGTTACTAAACGCACTTGGCTTCAGAT

GGCGGAGAAAGCTTCACCGGCTGTTCGCTCCGCACTGGAGGCCTATCGCGTCGCCAT  
TACGCGCATCGGAAAGGGCACGGGCGTAAGGGCCCCCGCTTCCGAAAGGATGCAC  
GCGACGCAGCTGATCAGGCCAGTCCAGCGATCCCATGCTGGATCATGCCCCACTATC  
GCGTTAGCGAATCCTTGCCGGTTGCTCTGGGAGCGTTCGACCTTGTCATCATCGACG  
AGGCATCCCAGTCAGATTTGACTGCACTCCCTGCAATTCTTCGCGCCAAGAAGATCC  
TGATCGTGGGCGACGATCAGCAGGTGTCACCTGAGGGGGTGGGACTGGAAGAAGAC  
AAGATTCGTAGCCTGATGAACCAATTTCTGAATGGACAGGTAGGGTTGTATCGTCCG  
CAGATGTCGCCGGACAAGTCCATCTATGACCTGTTCAAGGTGGTTTTTCGCGCATGGC  
CAAGTCATGCTCCGCGAGCATTTCGCTGTGTGGCCCAATCATCGAATATTCAAAG  
CGCGAGTTCTACAACCACGAACTCCGCCCCGTTGCGCCTGCCCCGCTCCTCTGAGCGA  
CTGGACCCACCCCTTGTGGACGTCCATGTACTGGACGGCGCCCCGCGGGAACGGGAA  
GACAAACGAGGGCGAAGCCAGGTTTCATCCTGGAAGAGATCAGGAAGATCACCCAA  
GACCCAAACATGTCCAGGCGAACCATTGGCGTGGTCTCGCTGGTAGGTAGCGAGCA  
GGCGAAGCTGGTCTGGGACAAGGTCGCTGCGGAACCTGGCGAATCGACGATCGAGA  
AGCATCACATGGCCTTCGGCGATGCCAGAACCTTCCAAGGCAAAGAGCGAGACATC  
ATGTTTCTTTCTATGGTGGTCTCTGGGCGTGCCCAAGCCTCCTCTCAGGAGATGTTCC  
GCCAGCGCTACAACGTTGCGGCCTCGCGCGCCCCGTGATCGGATGTACTTGGTCCGCA  
GCATCACCCCGGAAGAGCTGAGCCAGCCGACAAGCTTCGGGCTGGCCTCATTAG  
CACTTCAGCTCCCCTTACCTTCAGAACGAGGAGGAGGTCGCGGATCTGAGGAAGCT  
ATGTGAATCGCCTTTTGAGCGCGAGATGTACGACGCGCTTGTAAGAGCGTGGCTATCG  
CGTACGCCCCGAGGTTAGGGTGGGAAGTTACCGAATTGATCTGGTGGTAGAAGGCG  
CTGGCGACGCGCGACTGGCCGTCGAATGCGATGGGGATCAGTACCACGGTCCGGAT  
CAGTGGCAGCATGACATGCGTCGCCAGCGGATCTTAGAGCGTGCAGGATGGAAGTT  
CTGGCGGTGCTTTGCTTCCACCTTTGTGACTGCGCGTAACGCAGTTCTGGACGATCTG  
GTCGCCACACTAGATAAAATACGGCATCGAGCCCGTTGGCTCGCAAGTTTCACCTCAA  
AGTCTGCACAGTCAGTTCAGAAGCTACGAAGCTTTCCGTGAGGATGTTTCGATCCTTG  
GGCGATCTCAGCAGCGTGTCAAGAACATTTTAGATCACCAAAGTTGATCTTCAGAAA  
GATCGGCATTTGAGGGATACCAGTCAGCTTTTCAGGCGGCAGACTTCTCTGTATATC  
GTCCCATCAAGTACATATTGCGCAACAATTCAAATGCCAAAACCTTCTACACACTGCC  
GACTGGCAGATCGGCAAGCAGTTTGGAGGTTTCGAGCCGGACGATGCCGCCCTCCT  
GGCCAAGGCGCGCATCGACGGCATCCGCGCGATCGCGGAACTCGCCACGGCTGAGC  
AGGTTGATGCCGTGCTCGTCCCCGGCGACGTGTTTCGACGCCCAGACCGTTGCCGACA  
AGACGATTACGACAGGCGTTCCGAGCCATGGAGCCTTACCCCGGTCTTGGCTGCTCA  
TGCCCCGGAACCACGACGCCGGTTTGATCGAGTCGGTTTGACCCGCGCACAGCGC  
CTCGGCGCCGTTCTGCCAACGTCGTTCTCTGCCTCACCCAGCGCCGGTCCCGCTG  
CTGGACGGTAGGGCCGTGGTACTCCCTGCCCGTTGACCCAGCGCAATACCTTCGCC  
GACCTACCGAATGGTTTGAAGACGCGCCGCGCTTCCCCGGTGTGATTCGTATCGGC  
ATGGCCCATGGCAGCGTGCAGGGAGTTCTGCACGACGGCATCGACTCCGCCAACCC  
CATCGCCGCCGGCCGCGTTGCCAGTGCCGGCCTCGACTACCTCGCGCTGGGCGACTG  
GCATGGCACCGCGCGGATCGACGCCCCGCACCTGGTACAGCGGCACCCACGAACAGG

ACCGCTTCCGCGGCAATGACCCGGGTAACGTGCTGATCGTGGAGATTGAGGCCGGC  
CAGGAGCCGCAGGTCCGCGCCGTTTCGATTGGCCGCCACCAGTGGCGCCAAATCGA  
GACCGCCTTGCAGGTAGCCAGCGACATCGATGCGCTCGAAGCCACCCTCGAAACCC  
TGTCACAGCGCGGACGTCGTTGACCTTACAGTCACCGGCGCTGTTCGACCTGGCCAGCC  
ACGAACGCCTCCAGCGCGCCATCTCCCGCGCCCAGGGCCGCGCCTTGGCGCTACGGT  
GGGATTTGGCCGGCCTGCAACTGCTCCCCCTCCCCCGAGGACATCGCCAGCCTGCGTG  
CCGATGGGTACCTCGCTGATGCGATAAACGAGCTGCGCACGACCCAGACGCTCGAC  
GGCGACGCCGGCGACATGGCCCCGGGACAGCCTGATCCTGCTGGCCACTACTATGCG  
CGGCGTCAACACCACGGGAGCGGCGGCATGAAGCTCCAGCGAATCGCTCTGCAGAA  
CGTCCGCATGTTCCGAGCACCTGTCGTCCTCGAGGACCTGGAGCCGGGCCTCAACGT  
CTTCTCCGGACCCAACGGGACAGGCAAATCCACCCTTGTGGACGCCATCCGTGCCGC  
CTTCTCGAGCGCTACAAGTCCAGCTCGGTTGACCACCTGCGCCCGCGCGATGCCGG  
CGGCGTCGCCCCGACCATCCAGCTCGACTTCACGGTCGCCGGCACGCCTTACCATCT  
GGAAAAGAGCTTCCTCGCGACCAAGCGGTGCTCCCTGTCTTACGCCCCGCGAAACCT  
GGACGGCGAGGACGCGGAAGACTACCTCGCCTCCCTCATCGGCTACAGCTATGCCC  
GGCGCGGCGCCAGCCGCGACGACAACCTGGGGCATCCCCGGCCTCCTCTGGGTCCAG  
CAGGGTGCCGGGCAGGACGTCCACGCGCAGGTGGAACACGCCGACAGCCACCTGCA  
GGGCGCGCTGCAGGCCTTAGTGGGCAACATCGCAAGCACCGGCGGTGATGCGGTCA  
TCGATCGCCTGAGCGCGCAGAAGGACGCGCTGGTCACCGGCGCCCGCAATGACCCA  
CGCGGCCCTATGCCACCGCCAGGAACGAGCTGGCCGCCTGCACCGAGCAACTGCA  
GGGCCTCGATGCCCGCATCGAACGCTACCGCGGCCAAGTCGACGATCTAACCCGCC  
TGCAGGCGACGGTGAGCGAACTCGAATCCGCCCCGCCCGTGGGAGCAGTTGGAGGCC  
CAGCGCGGCCAGGCCCAATCCGGACTAGACGAGGCGGACCGTTTGCACGGCGCAAT  
TGCAGCCCAGGAACAGCGCCGCGAGGACGCCGGCAACCGCATCACCTCTTTACCA  
ATCGCCTTGCGGAACCTGCGTGAACCCGAGTCCTTGCTGGCCTCGGCCATTACGCGCC  
TCACCAACACCACCGACGCCCTCGGGAACATGCAGGCAAGGTCCGCGCAGGTCCAG  
GGCGACTACGCCACCGCCGATCACGCCATGAAGGAGGCAGCCCAAGCCCTTCAGCA  
GGCCCAGGACGCTGCCACCCGCGCGGACCTGACCGGCCAACAGGGCCGACTCGAAC  
ACCAGCACGCCGCCCTGCACACGCGCCATGCGCAGGCACTGGAGGCCAAGGGGCGG  
CTCGAGGCACGGCAGGCCGAAGCCGCCGCGCACGCTGCTCCACCCCCAAGACCTCGA  
GGCCATCCGTGAACGATCAGCGGAGCTGCGGGATGCCGTGGTGCGGCTAGAGGCGG  
TCAGCACTCGTGTTCGGCTATACCCTTGATCCCGGTATCCAGTTGCGCGCCGGCACCG  
ACACCCTCGCCGGCGACGGCGAGCTGCTGGTAACCGCTCCTGTGGACATCGAGCTG  
CCGGGCCTGGGTTCGCTGAGGTGCGACCTGGCGGCGAAGATCTGGATGCCCTCGT  
CTCGCGCCGCACCCACTCCAATGAGGCGTTTGCCGCCTCTCTCACGGCAGCAGGGGT  
AGCCAGCCTGCAGGAGGCTGAAGCCAAGGCCGAGGCGTACCGTGCCGCCAGCATG  
CCGCTGACGTGGCGCGCGGCGAAGTGCAGCGCCGCGGCGCCCGAGGGCATCCCAGCC  
CTCGCCCTCGAACTCGACCGGTTTCGACGCCGACCGCATGGCGATCGCCGCGCGCTTA  
GCCGACCTGCCGCCGCCCCCGAGACTACGCTGCCCTAGTTGAAGCCCAGGATGCC  
CAGCGCCACGCACAGGACGCCCTCACGCTGGCCGGTGAGGAACGCTCCCGGCACCA

GCAGCATGTGCGCGAAGCCGAGATTGCACGCGACCAGTCCACCGCGGCCGTCACGG  
AGCTGCAGGCCCGCGTGGATTCCCCGACCCGCCAGGATGAGATTGCGGATGTTGAC  
GCTCGGCTGCTCCAAGCCCAGGCGGACGCCC GCGACGCCGCCACCCAGCTCCGCGA  
GTTTCAATCGCAAGCTGCTGCATTGAACGCTGACCAGCTGAAGCTCGACGTCGACCG  
CCTCGATGCCAGCGCCAAGGCTGAGCGCAGACGCTTCGACTCTGCTCGTGATCGCAT  
GACCCAGGTGCGTGCCGAGATCCAACACGTGGGCGCCGACGGCCTGGAAGAGCAGC  
GCGATCAGCTGCGTGTGCAGCACGCCTCACTGACGCTTCGCGTAGGCCAGTTCAAGC  
GCCAGATCGAGGTACTAACGCACCTGCTCGAAATCTTGGAGCGTCGCCGCGCCGCG  
GTGCAGCAGCGCCTGCTGGCGCCCCTGCAATCCCGAGTCGACTACTATTTGCGTCTG  
CTCTTCCCAGACCAGCAGCTCGTCATGGATGCCGGTCTGCTACCGGGTGGCCTGGTC  
ACCACGGAAGGCCGCAACGCCGGCGACTACGAGGAACAGAGTTTCGGGCACGCGCG  
AGCAGTTGGGGCTGGTCTGCCGCCTCGCTACGCCGATCTGCTGCAGCAGTCGGGAG  
CCCCGACCCTGCTTGTCTTGGACGACGCCTTGGTCCACTCCGACAAGGATCGTCTCG  
ATCGGCTCAAGCGCGTGTTGTACGACGCATCCCAACGCCATCAGGTGCTAATGATGA  
CCTGCCATCCGGACCGCTGGCGCGACTTGGGCACGCCCGTCCGCGATCTTGCTGAAG  
CTTTGCAACCTGGCACGTGATGGGTTTTTTTGACAATCCTACTCACGCGGCCAATTCA  
ACGTCTGGGGTTCGGTCCCCGCCCCGCGGAAGATTGAGTTAAGCACCTGGGCTTCACT  
ACCCCCGATAAGGCTTCGTAGTCCCCTGCCCCACTGACGCTCCCTTTCAGCCAATGG  
CAGGCTATGGCGACTACCTTAAGCCAGTTCTTTCTCATTGAGAATGCTCGGACTACT  
CTTGTCATCATGAATGCCGAAAGCACCAAGCGACCGCCCGAACGCGAGTGGCATGGA  
AAGCATCTCTCGTGGAGTTACCGTCCGCACGCGTTCGCTGGGAAGGCGAGCAGAT  
CGAGGGTATCAATTTCCCTCCGCTGGCTCGCGAGATGCGGGCCTGGATGATGCAACG  
CGGCCAACTCTCATATATCTCCAACTCCGACCGCGAAATCAAGGGGCGTTACACGA  
ATCCATACAGCTACAGCGGATCCGCGCTTTCTTTGGTCCTGAGTCGGGCTATCAACG  
CCTATCACGATTACGCCACCAGCCCGACACCGGATCACACCGAGGTGGACGCAGAA  
GTCGAGCGACTTCGCCTATACAACGACGTGCTTCTCTATACCGCTAGAGTTTGCGAG  
GTCGCGATCAAGCAGTTGCTCTATTGCACGAACTTCACTGAATCGCGATATAAGCGC  
TTAGCGCTCGGCGCTCTGCTGGAGTCTCCCTGTCCTGCATGCAAGAAGGAGAACGGG  
AAAGACCCGCATTTGGTTTCGCTGATAGGCACGCTAGCGCACCCATTTTCATCTGTGC  
CTTGAGTTCGACCATTGCGCAATGGATCACATGAATTTTGTGAATAAGCTACGAAAC  
TCCCAGGCCGCCCATTCGAAATCCAGACGCTCAACATCCGCACCGTAGGAGAGTC  
GAAGCAACAACCTGCTGAAAGATTGCGAAGAAGTTCTCTCTGGGTTTCTCCACATGCT  
GTCGCATTTTCGAGAAGCTTGAGGAAGAGATTCTGAACGACCTGGCGAAGAAAGGCG  
AAGCCATCATTCTCCTGAGACTAAACGGACTTCCGCCGGAAGACTGCAATTTCAATC  
TGGTTCCCGGGCAGCGGTTTCGTGTTTGACCCTACAGGTGATCCGCAAACCCCCGAGC  
AGGCATGACTCGGGGAGGAAAACCTGCTCTCTCCCTACCCACGATAAATCGATCGAA  
TCGTTCTGCAGCTGCCCTACTCTCCTTCCGCTTCCGGCCAGAAGCGAGCATCTCGCTC  
CGTCATGCCAATACTAGATCTACACAATTTGCGGGGCCGAGGCTTGACCGATCATT  
CAACCCAGCCTGAACCCGAACTACCTCGAAGCCACCATCACAAAAATCATCGTTGC  
CAGCCAATGCGCGATAGAGCTTGGCGAGCCAGTAGTTCGGGCCTGAGACTTCCTCG

AAGTCGACTGCTCCCTCGATCAGCTTCTCCGCGACGCGCTCCGCATTTTCACCGGAA  
CCATAAGCGCGACGAAGCGCTGGATACTGACCGCCCAAATGCTCGAGGCCCATCCG  
CCTGTAACGATCGGCGAGGTCGAGCACGCTGAAGTGCGATCGCAGATGTCTGAAGG  
TTCGGAGTGACATTCCGACCGGTCGCGTCAGCCTGTAGGAGAGGATCAGGGCGTCC  
GCATCCATGCGCGCGCGCACCGTCAGGAACTCCGTATTCGGGATCACGTCGTAACA  
AGGGTGCAGAAACATCCGCACATTCGTCCCCTCGTCCAGTATGCGGTCCCGTTTACG  
CGTGTTGCAGACCGCACAGCTCGGCACGAGATTCTTCGGGAACACCGAGAACTCGG  
GGTATTGTTCCCTTCGGCAGATAGTGGTCGAGCGTCGAGGATTCGCTGATCCCGCAGA  
ACGGGCATCGCGCCACGCTGATCCGCTTCAGAAGATCGCCACGGAGTCCCGTCATC  
GGCTCGGTCTCCACGATGAATGCGTGCCGCATTGCCTCCTTCTGCAGGTCGGTCAGC  
GCGGCTTCGTCCAGCCCACCAACCTCAGGCACGGCATCCTCGTAGCTATGATAGGCG  
GCAAGCACCTTCGTGCGCGCCTTCTGTATCCGTCCCCGTCGCGGCTGGTGCTTAGCT  
GCGGCGATCTCATCGAACACATCCGTCGCATCGACGGGGAGCAGAGGGATCGAGCG  
CATCCGTTATTCTCAATCTCATCGGAATGCTCAGAACGTAGGAGCGCGCCGCGAA  
GCCGAGCTTCCGACCAAACGCCTCTTCTATTTCTCAAGCGTGCTCCGACGCGCCAG  
TGTGCTCAGCGTCTCGTGCCAATCGGTTCGAGCCGTCGCCAAGATTGAAGACCTCCTG  
CGTGATGACGCCGATATTTTCCGCGAAGGTCTCCACACTTGGCGCCACGACGCGGCT  
CTGGTCAGCCACGCGGCGCAGCACCTGCACGTATTTTCGCGGGAGTCTCCTGCAGGAC  
AACCGGCGAGTGAGTGCGGATGATCGCATAGCCGTCGAACGCATCCAGGCACGCTC  
TTACGCTCTTGAGAAACGCAGCGAGCAGCGGCGGATGGAGGTGCGTTTCGGGCTCA  
TCGATGAGAACTAGGGTCGGCTCCGACCCCGAGATGTGTGCTGTGAGTTCGGTGACA  
ATCTTGAGGACAACCTTGTGACCGCTGCTCAGGCCGCGGAAAAGCTCGCCCAGTTTCG  
TCGTCATCGCGATTGGCGTAGAGCTGGGTCAATCCGATGCGCTGGAACGATGGGTTCG  
CGTAGGAGCGGCTTCAAGATTTCTAGTAGGTTTTCCAGGCGGTTCGGCTTGGCGGACG  
CGCTCCAGCGCCGACAAAACTCTGCCTCGATCTCCGCTGGCGTGCGCAGCCGATAG  
GCCTGCTCACCGTTCGGCGCTTCATCGTCCGATCGTTCTCGAAGGCCGCAATAGACG  
TATCCGAAGATTTCTCCGCGCTCTTGAGCCTCTCCTTCTCCTCCTTGGTGCGCCCCG  
GAATGACGAAGGTGTGAACGCACTGTAGGACACCACGACCACTGTCTTGAACGGT  
GGCGCGATGCCGACGAACCGACCGCCGCGTCGTCCAACACGTCTCTTTGCTGCCA  
TAGCCATAGCCGCTCGCCACGATTGCTAGGTTCGAAAGTAGCCGAGTCTTGCC

>CONTIG\_22\_length\_12360\_cov\_217.372026

TAGCGCAGCGCACTGGCGCTCATGCCGATCGCTGCCAAGGCACGACGCTCGCTGGC  
ACCGCGCCCGATCCACTCGCGCACCAAGCGTACGACGCGCCGGTGCGCTTACCACTTT  
TTTCGCAGCGCATCTTTGATCAGGTCGTTCTCGAACAGCTGCTCGGCTAGCAACTTCT  
TCAGTCGAGCATTCTCGGACTCAAGGTCCTTGAGCCGCTTGGCATCGGGCACGCTCA  
TCCCGCCGAATTTGCTGCGCCACAGGTAGTACGAGGCCTCGCTGAAGCCATGGCGCC  
GGCATAGGTCTTGATCGCTATGCCCGCTTCGGCTTCGCGCAGGAAGCCAATGATCT  
GTTCTCGGTAAAGCGCTTCTTACGTCCAATCTCCTCGGGGTAGGGAATTGGACTC  
CAAACCTGGGGCGCTACTCAAAATTGGGTGGACGTCGCCGCAACGCCGGTGGCCTTT

ACTGGCGAGAAGGGTGGATGGCAGAGCCGCTGGCGCTGGCATCGGCCGATGATGGA  
CTTGGCGATCCCTTCCGCGCTCACATAGAGGACTTGTTGGTCTGGATATCAAGGTTC  
CGGGGGACTCAAAAGCGGCCCTCAATCGTGGTGTCTGGAACGACATGGATTTGAGGC  
GTTACACGCGAGGTTTGTCCGATGAGCGCCGCCAGTGGCTGGAACAATTGCGCGAAG  
CCGCGCAAATTGAAGTCGCGTCGGGAACCTTCCGGTGGAGTCGAGGGTTCGTTTAAA  
AAAAATTCAGAAGCGAGCTACTAGCTGTGTGAAAAGGTCCTTGTACGAATCCCTGCC  
GACCGTCAAGACAGATTCAGCGCATGGACGGCAGGGCAGGGGAAGTGTATTAACAC  
AAGGTATCACCGAATGATAAGAGAGGGCTGGGCTATGGCAACATACCTCTAGATCGA  
TGACGGCCTGAAAAGCCGCGTCCAGCAGCTCGCCAGCCAGCGCCGCCGCTCGGCCT  
ACTGGATTATGCTGGAAGCGATCGAAAACCTCACGTGCAGCGCGAGAAAGCGCGCGA  
GAGTTCAAGGCAGGAAGCTTGGCGTCCTGGACGGCCTATCAGGAAACCGGCCGCC  
ACCTGACTGGCGAGCAAGTCCGCACCTGGTTGACTACCGGCGCTTCCTGGTGGCCCA  
AGGCCCCGGAAGCGGCCCTAGCGCGCCGGCCATGCCATTGAGCGGCAATTCCTGCTG  
CTAGAGAAGTCGTCGGACATTGGCCGGCCACTGCCGGAGCTGCGCGAGCTGGTGAT  
AGCGTTCGGGTATTCCCGCTATGTGCGCCCTGTATCGCCACGAATCGACCGCCGATGC  
GGTGACGTCTTGGCCTTCCGGCATCAGAAAGAAGCGGGCTACTGAGGGAGGCCGG  
GATGAGGGTCGGCAGGGAGTCGTTTAAAAAACCTTTGCTGACAGCTAGTTAGCTCAC  
TTTTGGCTGTTTTTTTACGCAAATCCCTGCCGACCCTCTTGCCGAGCTAGAAGCCGCT  
GTGCAGCAAGCCGCCATGAGGGGCGCTTGGTGGCATTTCGAGTCGGTGGCACCTCGC  
CCAAAGCTGCCCCGGGCAAAACACGCGCGGTAAGGGCGTCAGCTGATATGCATGCA  
AGTCGTCATGACGCCATGCATGCTCGACGCTTACGTAGCTTGTATGCATGGCCTCTG  
GTTTCATTGACACTTGAGGGGCACTGCGTTTTAGCCGCTAAAAAGTGGCGGCTGCGA  
CCGACGAGGTGAAGCCGGGGCGCATGGCCTGAGTGCCCGATGCCTTGCGCGCCTCG  
ATCCAGTCTTCGACTTCGGCCAAGTCCCAGGCGACGTTCCGGCTGGTGAGTGCGATC  
CGGCGCGGGAACCTCCCCGCGCTGCTCCATGTTGAAAATCGTGCGTTCAGACAGAGG  
AATCATCGCCAGCAGCTTTTTGCGGTTGATGAGCGTCTTACTTATCGTTGAGTGCATC  
CCCCGGCCTCTTTCGATCACTTGCGAGCATGTGCCTGATGGTGCCTGTGGACGCAGA  
TTGATTCGTCCTATTAGTTGGTCAATTCGGTTGACGCCACGAGCGTGATTTTGATCTC  
AGGTGGAATATCGCAGGGATCGACGCCAGCGCCTTCGATACTGCTTGGCGTTTCGATG  
CCCAGCTTCCGCGCAATCTCCGACTGATTGAGTCCAGACCACTGAAGCATCAGCATC  
TGCTTCTTGCGGTCCGATAGCTTCGAGTCCACCATCAGCCGCGCTTGATTGCGCAAC  
TCCGCCTTGTCGCGCGGTTGTAAGGTCTGGTCCGCGACGTAGTGGAAGAAGTAGCTG  
TCAACTAATTGATCGCCGATTTACCTGGGCAGTGGCCGGCTTCGCGCATTGTTGG  
CTGAGTCTCGCCAGTTCGAGGTCTGAATTGCGCTAAGGATCGCCTTGCTTGTCTGTAG  
ACAGGGTTCCATGCGCCGCTCGGCAATTTAGGCCGATGATCCAGGCAATACAGGCT  
GCTGAGTCGAAGCTTTTCTTCTGGATCGTCCGCTTTTGGATCATCGCTCCCGCCGGCG  
AATGAGGTCAGCTCGGCGAGTGATCCGCAGAACCGGCAGAACCCCTGAAGGCGCTC  
GCCATTCAGTCGTGTGTGTCGCGCACCTTTGATTTTCGTGCGCCGTTTGCAGGCGCAGTCC  
CATACAAGCCCGATCAACGATTTCGAGTGTGCTACAAACCGCCGATCTCTTGAGGTCT  
TGCTTGTCCCCCGTCTTAATGAACTGGCGCAGCAACTGCCGCTGCATGCGAACCATC

GCATCAAGTCCCACCAGTCGAATGATTCCGCTGAAACTCACCCCTGTTCTGCTCCG  
GGGATATGGCCCAAGTAGCGTTTCGGCAGCGTCGCCGTGTACGCAGCCACGGCGGG  
GTCAATGAGTTCCTGTATCAGCCCAACGATGGGGTAGCGACGCGAGGAGGCGGAAT  
ACGGCCGCCAGCGATCCTCGAACTGCTCGATGGCTTCCGAGACAGTGGGATCGCAG  
CCTTCCCAGGTGACAATGGTTGTATCGTTCTTCATGTCAACCATTTTGGACAATAAT  
AAGATGTAGGCAATCCCCATAACACCTAACCTTCGTAGCAATTTCGGTTGATAACGGA  
GGTTTACGCAATGACGATAGAAGACACGCTGCTGCAACGCTTCGGCCCCGCTGCTGA  
GCATGGCGCAGCTCGCCTCTGTCTGGATCGATCACCGGATGGACTGCGGGTCAAGTT  
TGCGTACGGCGAGCGAATGGGCGGGGCGAATCAACAAGGCTCGCTTCAAGATCGGT  
CGGCGCGTCTACTTCCGAACCTCGCAGATCGCCGAGGTGTTGAGCGACGAGTCCCTA  
TACGGAACGGGGAACTGAGTCGTGGCGATTGACGTCCTGGCGGGCGTTTCGAGTGCGA  
ACCGCCGGTGCTGGACTTCATATGGCCGGGCTTCTGGCGGGAACCGTGGGCGCGCT  
CGTTGCTCCAGGAGCCACCGGTAAGAGCTTCTGGGCGCTGGAAGCGGCCATGAGCA  
TCGCATGCAGCGTTGCCGGCGGCGACCTCGTGGGCCTGGCTCCCGCACACTCCGGGC  
GCGTGTTTATCTGGCTGGGGAAGACCCGCCGTCCGCGCTTGTGCGGCGCATTACG  
CCATCGGCCAGCACCTCGAACACGCAGCACGCCAAGCCATCGCAGAGAACCTTGCG  
CTTGAGCCAATCATGGGTAAGCGCTTGAACGTCATGGACGAGGCTCACTTGCGCCGC  
GTCATTGAGTACAGCGCCGGGGCCAGGCTGATCGTGCTGGACACCCTGAGCCGCAT  
CCACGCCCTCGATGAGAACAGCAATGGCAGCATGGCCACCTCGTGGCCGTGTTTCG  
AGCAGGTCGCGGCTACCACGGGCGCATCCGTGCTCTACCTGCACCACGTCAGCAAG  
GGAAGTGCCCGCGAAGGCCAAACCGACCAGCAGCAGGCCGCGCGTGCGCTTCCGC  
GCTGATCGACAACGCCAGGTGGTGCGGTTATGTGCGCGCATGACTGAGGACGAGG  
CGAAGCGCCTTAGCGACCGCGCCCATGACCGGCAGCCCATCGGCAATGAGCGCCGC  
AGCTACTTCGTGCGTTTCGGCGTTAACAAGCAGAACTACGACGCTACGACGCTTGAT  
CGCTGGTACATGCGGCACGCAGGCGGCGTTCTGGTGCCAGTGGAGCTGCATGAAGC  
CAGCAAGAATGAAGAAAAGGGACGTGATGGCCGGAGGCGAAGCGATGGCTTTTGA  
CCTTACACATGCCCCGGCACGATCCGATGCATTGCCTGGTCCCCGGTTTGTTCGCAG  
TCTCAAGCGCGGCGAACGGAAGAGGCTCAAGCTCGATGTGACGTATCACTACGCCG  
AGAATGAACAAGCGCGGTTTGTGCGGCTTCGAGCCTCTTGGTGCTGATGACATGCGAC  
TGCTACAAGGTCTTGTGGCTCTTGGAGGGCCGAAGGGCATCATCCTGACGCCAGATC  
CAACAGCAGAGTTGCCGAGGCAACTGCGTCTATTCCTTGAGCCGAAGTTCGAAGCG  
GTAGGGCAGGATGCGCTTGTCGTGCGAGAGAGCATGACAAGCCTGCTAGCCGAAAT  
CGGCTTGACCGATGGCGGCGACAATATCAGGGCGATCAAGGCGTGTTTGTGCTGCGTAT  
GGCAAACGTGACGGTAGTAGTCACCAATGGGATTAGGCAAAGGTCTTTTCACTTGAT  
GAGCTACGCCTTCGACGAAGAGGACGGACGGCTATTCGTGCGGTTGAATCCCCAGA  
TTGCAGAGGCGATTCTTGGGCGGCGCCCGTATACCCGCATCGAGATGGCCGAGGTG  
CGGGCGCTACAAACCGACCCGGCCCGCCTTATTCACCAGCGGCTATGCGGCTGGATC  
GATCCTGGCAAAGCCGGGCGCGTGGAACCTCGATACGCTTGCTGGCTACGTCTGGCC  
GGACCAGGCGAACGCCGAGGCTATGAAGAAGCGCCGCCAGAAAGCGCGCAAAGCT  
CTGGCCGAGCTTGCTACCGTGCGGCTGGAAGGTGAGCGAGTATGCAGCAGGGAAGTG

GGAAATTGGCAGGCCGAAGCCCGTAGTAACGTTCCCCAAGCTCCGTAGCAATGTTC  
CCCTTTATCCGTAGCAACGTTCCCCGCGCTCAAACCTGAAAACACAGCAACGGCGCGG  
GCTTGCGGCTAGTTCGCAAGTTCACCCATGATCTTCCAGGATCATCTACTAGGCGC  
GGTACTTGCCGCCGCCCTCTAGGGCGACGCCAGGCCCTTGCCATGGTCGGCCTTCAG  
CCGTTGAGTTGTACGCCAGGAGGGGTGGCTCGGCCGGACCATTTTTAGCGGCTAAAA  
ACTAAGCGCCCCTCAAGTGTTAATGAATCGGTGTTGTATGTTGTAGCGCGCTACAAC  
ATACAACAAGCGCCATTCGCGGCCTGGCCGCGAACGTTAGACCCGCTTTTGGCGGTG  
TTTCAGGATCGTCATCCAGGCAAGGCTTGCGTCTAACGCCGCTTTCGACGATGGCG  
GCCGAACGGTTCATTGACACTTGAGGGGGCCACCTCGCTGCCGATTATCTATGGACCA  
ACTCCCTTCTTGGCGTTCAACTTGTCGGTGGTGCTGAATGGCTGCCGTCGCTGTCTTG  
AGGCACGCTAGTGGCACCAGCTTCATGTCAACCATTTTCGGCCAATTATTGGAATGTT  
GCGCAGGCCGACACTCCGTAAGCTTCGCAGTAGTTCAGTTGATAACGGAGGTTTACG  
GACATGGCGACGACAGACAGCAACTACCCTGCCGAGTTGGCCGCACGGCTCGCTCT  
TGAGCAGCAGACCTCGCAGATCAAGCGCCGGGACTACCTGGTCGCTTTCATGGCGG  
CGCGCTCAGACGTAAAGAAAGCGATGGAGGCCGGCTACACGCTCAAGATCATCTGG  
GAGCACATGCGCGATATCGGGCGCATCCCTTTTCGATATGAGACGTTCTGAAATAC  
GTTTCGCCAGCACATCACCAATGCGCCGCCTGGGTCCATGAGTCACGGCAGCGCGAA  
GTAAGGAAAGCCCCGTGTTCAATCGCTGCAAGTGCGTGGCTGAAACACTGCTATCG  
GTTGTTGGATCGCTGCAAGCGCGCGGAAATGGGGCATTCTTTCAATCCTCGCGCTG  
CTGGCGCGCTGTTGCGAAGCAACGGTGCGCTTACAGCGCGAAATTCGATGAGTCAT  
ACGAGGCAAAAACAAGGCCGTAAGGCGGGCAGGATAGGTGAAGTAGGCCACCCG  
CATGCGGGTGTTCTACTTCACTGTCCCTTATTCGCACCTGCGGTGCTCAACGGAAAT  
CCTGCTCTGCGAGGCCGGGCGGCTACCGCCGAAGACTTGGAACGCCAGAGAGATA  
GGCCGCAGCCGCCCTTGCCTGGATGATGTCATTTGTGCGATATTGAAGTCAATGAAG  
TCACATATGAGGCCCTGACTATGGCAATCCTGACAGTGCGGAATGTGCCCCGACGAG  
GTGCATCGCGCTCTGCGCTTACGGGCAGCCGAGCATGGCCGCAGTACAGAGGCGGA  
GGTCCGCGAGATTCTGGAGAGTGCAGTTAAGTTAGAAAAGCGCATCCGCATGGGCG  
ACGCGTTGGCGGAGCTTGGCCGCCAAGTAGGGCTGACAAACGATGATCTCGCAGTG  
TTGGACCAGGTGCGCGACAAGGTGCCGGCAGAACCGATGAGGTTTGAATGATTGTC  
TTGGATACGAATGTCGTCTCCGAGGCGATGAAATCCGAACCCGACCCGGCCGTGCG  
AGCTTGTTGAATGAGCAGGTAGCGGAAACCCTCTACCTGTCCAGCGTGACGCTTGC  
CGAACTGCTGTTTCGGCATCGGCGCGCTGCCGAACGGGAAACGTAAAAAAGGCCTGG  
GCGAAGCCCTGGACGGATTGCTCGAACTGTTTCAGCGAGCGGGTGCTGATGTTTCGAC  
ACCGAAGCAGCTCGCAATTATGCCGAGCTGGCGGTGAAGGCCCGCATAGCCGGGAA  
GGGTTTTCCAACACCCGACGGATATATTGGGGCTATTGCGGCCTCCAAGGGATTTAT  
CGTAGCAACACGCGACACCAGCCCTTTTGAAGCGGCCGGGCTTACCGTTATCAATCC  
TTGGAACCATCGGTAAATTCAATCGCTACTTGACACCGTGATCTGATCAAAAAGGCC  
GGGCTTCGGTGTCGCCCAGGTCAATTACCGGTAGCTCCGTGGCGCAGCTACGTGATG  
AACCTTGAACAAGCGCTCTTGCTCAGGGGGGCAGCCATTCATCGCGAGGTAATGA  
CCATGAAGCAGCACGTTTTAGCGGCTAAAATCGCTTCTCCCTAGCCCTCACTGTTG

GCGTCGCCTCAATTCCCGCGCATGCCGGCATCCCGGTCATTGACGGAACCAACCTGT  
CGCAAACGACCGTGACCGCGATTCAACAGGTCGCGCAGGTCCAGAAGCAAATCGAG  
CAATACGCAACGCAGTTGCAGCAGTACGAAAACATGCTGCAAAACACGGTCGCGCC  
CGCCGCCTACATTTGGGATCAGGCTCAGTCCACCATCAACGGATTGATGCAGTCCAT  
CGACACCCTGAATAACCTCACCAATCAGGCCGGCAGTCTGGACGCTTACCTAGGCA  
AGTTCCAGGACATGTCCTACTACAAATCGTCGCCGTGCTTCACCTCGGCCGGCTGCT  
CGGACACCGAACGCGCCGCGCTGGAAAAGACTCGCGCCTTGGCTTCGCAGTCGCAA  
AAGGCTGCAAATGATGCGCTGTTCAAGGGCATCAAAGATCAGCAGGAAAATCTCAA  
GTCAGACGCGCGACAGCTTGAACGTCTGCAATCGCAGGCGCAGGGCGCAAAAGGGC  
AGATGGAAGCCATCGGATATGCCAACCAGATTGCCAGCCAACAATCCAACCAGCTC  
CTGCAAATCCGTGGCCTGCTTCTCGCGCAGCAAAACGCCATCGGTGCGCAGTTGCAG  
GCCCAAACCGACCGTGAGGCGCAGCAGGAAGCCGCGCATGAGGCATCGACGGAAC  
CCAGGATCGGGAAGACTCCCAACCCGAAAAACTGGCTGCAAGTGAAGCCGTAGGAG  
GGCCAGAACATGAAGAAATCAACGGTCCTCTTGACCGCCGTTCTCGTCGCATTGGTC  
GCCGGCTGCGATAACAAGCAGCCGGCCCAAATGCCCCGAGCTGAACGCGGCAAACTG  
CGGGCCCGACCGCATCCAGAAAATCGAGGATCGGCCAACGCGCGAGCAGTTCGCCG  
GCGCGTGCTCCCGCCGGTCGGTGATTGCACCGACCGAGAATCCCAAGAACTGGCTG  
GAGGTGAAACCATGAAACGAATGGCGTTCGCCCTTAGCGTCGGCCTGGCCTTCGCAT  
TGTTCTCAACGGGTGCCTCGGCCGAGCTAACCAATCAGGGCATGCTTGACCAGGTGG  
TGACGGAATTGCGCCAGCAAGGCATCGAGCTGGAAAACGGTCATCATGGATGCCGCG  
ACGTGGCTTTTCTGGACCCTGGGCACGATTTCCCTGGTCTGGACGGGCGGCACACTG  
GTCATGAAAAGGGCCGATGTTGGCGAGTTCTTCGCGGAGTTTGTGCGCTTCATCCTG  
TTTTTCGGCTTCTACCTTTGGCTGCTGCGCAACGGGGCCAGAAATCGCAGATGCGATT  
ATTCAGTCGTTGCAGCAACTCGGATCGAAAGCCACCGGCATATCGTCCGTGACGCCC  
TCCGGCATCGTCGATGTGGGTTTTATGATCTTTCAGCAGCACGTCAAGAATTCGTCC  
CTGTGGAGTCCGTTGATAACGTCATTGGGGCAATTTTGAGCCTTGGAATCCTGCTG  
CTGCTCGCCACCATTTCAGTCAATATGCTGCTTGTCTGGTGTCGTCCTGGTGCCTGA  
TGTACCTGGGAATTTTCTTCCTTGGCTTCGGCGGCTCGCGCTGGACCTCTGATATGGC  
GATCAACTACTACAAGACCGTCCTCGGGGTTGGCGTCAACCTGCTTGTGATGGTCGC  
TCTGGTCGGGATCGGCAACGATCTGCTGACCGGGTTTTACGCCAAGATGGGCAAGG  
GCACGCTCAACTTTGAAGAAATGGGCGTGATGCTGGTTTTCTGCCTGGCCCTGCTGT  
TGCTCATTAACCGGGTGCCGCCTCTGATCTCCGGCATCATCACCGGCGGCGGCGTTG  
GCGCGGCCCGGCGGCCTCGGTCACTTCGGAGCCGGCGCGGTTGTAGGTGCGGGCATG  
GCGGCCGCAGGCATGGCGGCGCAAGCTGTGGCCGCTGCTGCGTCCGGCGGTTGCTTC  
CTTGCCGCATCCGCCGAGGCGGTGCGCAAGCCGTCATGGCGGCGGCCTCGGCGG  
CCGCTAAAGCCGCCGATGGCGGCGGCGGTGGTATGTCGAACGCAGGCGGCGGCGGG  
GAATGGGGCGGCGTTGGCGTTGCCGGCGGCGAGCCTATGGCCGCTGCATCCGGTGG  
CGGCGGCTCCCCGATGGCCCAGGCCGCAGGCGATGGGGCATCGGGCGGCAGCGGTA  
GCTCTGGCGGCGGTTAGTTCCTCTGGTGGCGGAAAAGCCGGCCAGATCGCGAAAGGT  
ACGGTCGCCAACCTCGCCAAAGGCATCGGCTCGATGGCGTCGGCCAAGGCCGGCAG

CATGGCCGAAGCGGCCAAGAGCCGGATTGCGGAAACTACCGGCGGCAAGCTCGCTG  
CGACGATCAAGGCGGCCAGCAGCTCGACCGCTGACAACAGCCCTTCCAGCTCGAAT  
GACAATGCGCCGGCAGCCGCCGGCAATGATGAGGTTGCGGCGTTTCGTAAACCGGCC  
GCAGACGACCTAAAGCGCGTTCGGCCGACGATGCAACGCCGGCCGACACTTCCACTA  
TCCACCTGTGAGAGAGGTGAAAAATGGCAACTATACATCCTAACGAATTTTCCCAAG  
TCGTTTCAGCACGCGGCAGCGGAATTGAACGCTATCGACTGGCTGGACCAGGCAACC  
GCCCCGCGAGTTGGGGCCGCTGGCCGAAGCCACGGCCAACATGTTTCATGGTGCTGTTT  
TACCAGGCCGAAACGGGCCTCGCGACACGCGATGACTTCCTGAAAGCCAGGACGCA  
GATTCAGAACGTTCTGAGCGCGCACAACGACCGTTTTTCAGTAAATCGGAGGCTTTAT  
GGACTTTTTTCCCCCGCAATCATTCTCTGATCTGCTGATCGTCTGGGCACTGATGTTT  
GTCGTCATGCTCGGGTTTTATTTCCTCGGCCGGCTCATCTGGGCATTGGGTTTAGGCC  
CCCAGGCCACGGCGATCGCAGACAAGATGGAACGCATACAGCAGACCGTCATGCAG  
CCGACCGGGCAACGTCTGATCGAAACCGCTGACCAGCTTTCAAAGCTACAAGGCTG  
GCCTTTCCAAAATCGCAACCGCCACTAATCTTCCCTTCAAGGTATCCCGAGAACAAG  
GGCGGCCAATGTGCCGCCCTTGTTATTTTCGCTTTGTCCTTTTATGGCGTCCGCTCTGC  
GACCTCATTGTGCGCGGGCGATATAGGCCGGGTCGTCGGTCTTCTCCACTTCGTCCAG  
AAATACCGAAATTTCTTCCACACTGGTTAGAACATCGGCTAGGTCGTGGGATGTGAG  
CCGCTCGTCGCCGGCCAGCTTGTCAGTTTGGCCATGTGGTCGCCGGTACCGCTCAT  
TTTTCCGTGTCCCTTGCCTTATTGAGCCAACCGGCAACATCATTAACTGGTAGGCGC  
GGAAATGGCCGCGCGTGACCTGTGCGAGTTCGGCCGCCGGTAGCTCGATCTGGGCG  
GCCGCCTGTTCCGGCGACCATTGCCGAGACTGGATCACTCGGCGGAGCTGTGCGATA  
AGCTGCGCCTTGCCCTGCATCGCTTCGGCATCAGAAAATTCCAGATCGGCGTACACG  
TTGTCGCTGCCATGGTGAATCTCAATATCGCCCTGTTTCGGGCACAGATACGATAGAT  
TTTTTGAGCATGTGGCCTCCTTTTCATTGCAGTCTGTCGCGGTCGTCGGTGAGGATTTT  
CCGATATCCGGTCTCTGTCATCCACCTTGCCCTGTCTTAGATAATTTTACAGCCATGG  
CGGGTGCGCTCCAGTTCTGCCACAGGGTCACAGTGCGGCACGATTTTGGCGACTTCC  
TGCCAGTCCACGCCGTCTGCTTCAGCATCGAGAAGCCACATACTGGCGACAAAATG  
GGCCTCGTCGTAAGGGGTGATCCTGTTGGACCACTGCACGTCGTCAGCAACCTTGGG  
ATCAAGATCTGATATAGCCTGTTCTTCGGTTCGTCAGGTGTGTGAGGTTCGGCATTGCT  
GTTTCCCCTGGCGTACCCATGTTTTTAGCCATGCCTCAACTTCGGCCAGTGTGACTGG  
CCGTTGAGCTTGTAATCCTTTTCGGACCCGGCGGTGTCGGTCGCGAGCTGGATGCGGA  
AGGCGTTGAGATCGCGCGATGCATCGGCCACCGTTTACATCGCATAATCGCCAGAG  
CTGTAGTATCTAGCATGACAGATGTGAAGTGCCTTCGAGTTTTTAAATATCCCCTAG  
CTTAATTTAGAACGGCTAACAAAACCTTTGACTATTGTCTCGCTAGCGGCAAAATT  
GCTGGCATGACACGTCGCAAAGAGATCCCCATTGCGCTGTGGAAGCGCATCGAGCC  
GCTGATTCCCCAAGTGAAGCGTTCGCCCAAAGGTGGACGGCCGCGTATCAGTGATC  
AGCAAGCTCTCAACGGCATCGTCTACGTCTTGCGCACGGGCGTGCCGTGGGAAGAC  
CTGCCTTTGGAAGTGGCCTATGGCAGCGGCATGACCTGCTGGCGCAGGTTGCGTGAT  
TGGCAAGCCGCCGGTGTGTGGCATCGTCTGCATCAGGTGTTGCTGACCGAGTTGCGT  
CGCGCCCAGACGCTGGATCTGAGCCGAGCCAGTCTGGATGCCGCCAGTGTGGCCTC

CCCCCGGGGGGGCCTACACCGGGCCAAACCCGACCGACCGCGGCAAACCTCGGCAG  
CAAACGGCATCTGATCGTGGACCGAAACGGCGTGCCTTTGGCAGTGTGCGTCACCG  
GCGCCAATCGGCACGACTCGGTCGTGTTTCGAGGAGTTGATCGATGCCTTGCCGCCAA  
TTGGCGGCAAACCAGGGCGCCCGCGACGTTGGCCAGACAAATTGCACGCCGACAAG  
GCTTACGACATCGACCGCTGTCGCGCCTTCCTCAAGCAGCGCGGCATCATTGCGCGG  
ATCGCACGCAAGGGAATCGAGCGCAACGACCGGTTGGGCCGTCATCGCTGGGTCGT  
CGAGCGCACCCATGCCTGGTTCGCAGGCATGGGCAAACCTGCGCATCCGCTTTGAAC  
GCCGCATCGATCTCCACCTGGCGTTGCTCTCGCTTGCATGCTCCATCATCTGCTTACG  
ACTTCTTCCTGGGCGGCTTCAACTCCGATTTCGAACACCAACGGTTGTGAAGTGGCC  
CAGGCGACCTGACTTGAGCGACTTCACCGCCAAGTGGAGTTGCCCATGTCATCCAGC  
CGCCTGGACCAAGGCCGAACGATA

>CONTIG\_23\_length\_12290\_cov\_269.350818

TGCAGACGGGCCCCGGCCAGGTCCTCAAATGATCGGCCATCGCCTTGGACAGCAT  
CAGCGCCTTGGGTGCATCGCCGCCGCCGATATGCGCTGACTGCCCTCGCGCAACTG  
TTGCCGACGCTTGGCCACCCTTGCCGCCATGACCTCAGTGGGCTCTGTCTGCCGCGC  
CCGCACCATTAGGTCTCCGAAGATTCCGGCATCGGCGGGGTTGTCCAGCTGCGCCTG  
AGCGATGCGCGTGCCGTCGGGCAGCGTCACATCTTTCAGGGTCAGCTCTTTGATGTC  
CCCACTGCGAACCTTTTCCAGCAGTTCTTCCAGATCCACGGTCATCCCTTTCCGCATG  
GCATCGAATGCCATCGATAGTGCCATTCCTATCGTGGCCGCCGCCAGCCTGGCGTGG  
TCACCACGACGGTTTCCCAGCGATCGGACAAGGTAACGCGAGCCAATCAGGGGCTCG  
AAGATCGGTAGGGACAAAGAAGCGCGCATAACAGGCCAGCCGAGCGCGACATCATC  
AGAGGCTTGGGCAAGATTGATACCTCGATTGATACCTCAAGGGGCATCGCTCGGAA  
TCATCAATCGGCCGGAATATCCAGCCAAGTCAGACACTTAGAGACTTGGCGGGAAGC  
TCTGGAGCGGGCGAAGGGAACAGAATCCAACCTACCCTAGCCCATTGATTCAATTA  
GCTTTTAACAAACCAAGGAATCAGAATAACATACCTCAAACGATACCTGACACTAC  
CAGATTCTATCAAACCCAAGCAAGCGAATTTCCGGCCCCGGGCAATCCAACAATAAT  
TTGACCAGCATTGAGCTCAGAGCACTCGTTGGCGCCATCTGGAAAAAAGCATCCTGG  
CCTGATGCCGGGACTGCAACGAGACCCACCCACGATCTGCCTGATAAAAGTGCGCC  
AGATTCAGTCACGCTCCTTCTTTGTTTCGGCGATCCCTGCTGATGGAAGTGCCTTAG  
ACAACGATCACCCGTTGTCCGGACCCCGCCCTTAGCACCTGGAGCGCTGCTAGCGT  
TAACCCGGGCTTCACAAACATTGCCATTTGCCCCATAGGCAAGTCATAGCGCTCCA  
ATTGGGATGCCCAGCGCAGACTTTACAATTTTAAAAATAGTCACAAATTTATTTGAC  
AATTGACACTGAGACCCTCTACCTTGAGCCAACAGGAGAGGGATCATGGCCGAGA  
ACGAAATCCTTGATTTGGGTCACCGTAGCCATTGGAAGGTGGTGCGCGCGTTGCTGG  
GTGACCCACCGTCCCGATGCCTGAAGTTGTTAAGAAAGCAGGTGAGGACTTTGAA  
GGCATGTTAAGTAAGCTCATCCGCGCCTTACGAAGCGGGGAGCCGCTCCTTCATTTG  
CTTCGCGCTGCTAAGCAGTCGCCAATCGCCCAACAGGCGGTGATTGCTGGCTTTACT  
GAGAAGCGTTTAGCCAAAATCGTGCTCAATGCAAGCCTGACGGCTCAGGGCCGAAG  
CGTGGCAATCGTTGCCGAGCACGCGACCCAATCGCTGATGCAGGTGATGGTGGACC

AAATGTGCAACCGGGCACTCCGAAACGGGGCGCTTCGTATCGCACAACGAGCAAAAC  
GCGCTTCGTAGCTCCCTAGCCAATGAATTTGCGCAACACCGCTCGGCGGTCAGGGCA  
GCATTGGAAGCTTCCATGACTGGCATGAAGGTGACCCCGATGAAGGTCCGGCCCAA  
AGCAAGTGCGCACGACATCGCCTACACCTCGCTTGTCATGATGCCTCCGGGAGACA  
GCCATGCACCCAGCCCTTGAAGTATCCAGGCTCGTTACGCCGATGGCAATGCAGA  
ACTGACGGGGCCACATTGAGCAGCGCCTTAGCATCAAAGCAGAGGAGCTACTACACA  
ATTTGCCCCGGCACACTGAGTCAGCGGGCGATGGATTTGCTCGGCGTCGCGGCGTGCG  
TCTACACCATTGATCGCACTTTTAAGCGCGTAGCCACGCCTTACAATGATGGCGGTG  
TGCGCACAATAAATGTGGCGTTTGAAGTGTCTGATTTTAGGTTTTGGAAGAAAGCCA  
AGACGATCAATGCGCTCACTAAATTGCTTTGCCTCCTCACGGATGACATATGGCTGC  
TGGGCTTTGTCAAACGCAAAGCCAAATATGCCACCGCCTCACACCAAAGCCCTCTCC  
CCTTTGATGGAAGTTATCCAGATCATCTCGCGCTTTACAGCGGTGGACTGGACTCAG  
CAGCGGGGCTTGCGAACTGGCTGATGGATGGCAAGAAGCCGCCCTTGCTTCTGACC  
GTCGATCATCAGAAATCCATCCCGTGGAGCACCCAGTCGCAAATCAAAGCGCTCGA  
AACGATCCTGGAAGTTGACTCACCGATCCCGCACGCGATGGTTACTGTGAACCTGGA  
AGGTGGCGCAACTGAGCGCATGCGCGACCAAGAGCAAAGCCAGCGGGCACGAGGC  
TTTTTGTTCTGTGCCATGGCAGCGCTTGTTGCGCATGGCTCCGACATCGGTTTCGATTG  
TGTTGTTTGAATAATGGAGTGGGCGCGATCAACTTACCCCTGAGCGAAGGCGGCTTGA  
TGGATGGCCTTTCCACACGCGGCGCGAGCCAGGTTTTCTTGCTCAGGCTTCAAAGC  
TTTTTTCTCGGGTCTTGATCGAGAGTTGCAGTTCAGTCTGCCTTACTTGGCACAAAC  
AAAAGCAGAAATGGTTCGACGCCTGACGAGTAACGCTCGCCTGGCTGATTGGGCAC  
AGCAATCTCGCTCTTGCGTTACACCTCCCTGCGTGAAAGCGGCAAATTCATTGCG  
GGGTTTGCGCAGCATGTTTGGAGCGGCGACAAGCCTTTAAAGACGCAGGGGTGAAC  
GAAAAAATTGATGAATACATCCATGACATCTTTGTGCGCCACGCCCCCAAAGACGC  
AAGCTACTTTTATGCCTACATCGACAACGCGCAAAGCTGGGCCAACTCGGATTCACG  
CGTGAATGATCGCCTGATGCGGCACGCAACGCTGACGCAGGCCGACATCCCCATTC  
GATTGATGCAGGCGCTTTACGCCCGCCATGCTCAGGAAGTGCTGCGAACCTACAAC  
AATTTGGTTCTCAGCGCCCCTTTGCGTGTCCCGCCCAAAGCGGTTCCCCAGTTGGGA  
CTTTTATGAATAACCTTAGTCAACGCCTCATGCTGGCGCGAAAATCGGCCGGGTGT  
CGCAAGAAACGGCGGCAAGCCACCTTGGCATGAGTCGGCCGACCTTTATCGCGATG  
GAAAAAGGCACGCGAAACGCAAAGCCCGATGAGCTAACCACGCTGGCAGCACTTTA  
TGGCACCACTTAAATCGCCTGCTGCGCGAAAGCGCTCCGCCGCGGAAATTGCTCC  
TCATCTTCGTGCTGTCATTGATAAGGAGGGCGACGAGGCAGGATTAGAAAGTGCCG  
TAGCCAAGCTCACGGAATTTGTGGACGACTATTTGTTCTTGCAAAGCAAAGTCCAG  
CTCATGCCAACCCCGTGCCGCCTGCGCAACCCACTCGATCACTGGGGAGTGTGGAGC  
GCTTCGCTGAGCATTGCGCGATCGAGCAACGCAGGCTCTTGGGCTTTGGCGACAGCG  
AGCCGATTGGATCACTACGCGACACCCTTGACGAAATTGGCATCCACATATTCATCG  
ATGGACTTAACTCTAAGCTTGCAGGACTTTACGCCTTTGTTGAGAATTTTGGCTATTG  
CGTTCTGATCAATCGCAAGCATCCACTGGCAAGACAGCGGTGGACGATTGCCCATG  
AGTATGGCCACTACCTCTTCGACCATGATCGGCGAGGCGTGGACTATGTGCAGCCCA

TGAAGCGAAAGCCTGAAAATGAGCGCTTTTGGCGATACGTTTGCAAGTCACTTCTTGA  
TGCCAACGACCGGCGTGCAAAAGCGCTTTCATGACACTTTCAGAGGAAAGGCGAT  
GTCAATGTCGGGGATGTGATCCGAATTTCCGACTATTACGGCGTGTGCTCATGGCC  
ATGATGCTCCGCCTGGAGACCATCGGGCTGATCCGCAAAGGAAGCTGGGATGCCAT  
TAAAGCGTCAGGGCGAAGTGTCAAAGAGATCCGCCAAGCCGCTTTGGACGAAAACG  
CCTTGGACGATCAACCGGTGTTTGGCCCAAACAACGATATCTTCCCTGAACGCTATC  
TCCTGCTGGCCATTTCCGCCTGGTCCAATGAGGAAATTACCACGAGTCAGTTTGCCA  
AGCTGGTGAGACGCTCAGTGCCCGAAGCACGCGACCTGGCACAAAGTCGCTCCCAG  
CTACTTGGCGACAACGATGACTCCTTAATTGAACTCAACTTGGGAAGCTCTGTGGTC  
TTTCGGGAGAGCCATAGCGCATGACGCATTACTGCTTGGATTGTTGCTCACTCATCA  
ATTTATATTGCGGCTGGGGCGGGATCCAAGAGCTTCGCCACTTAGGTCAAATGTGGT  
CCATTAGCCAAACTGCAATGAACGAATTTACGCGCACTCGAATCCAAGCTGAGGAC  
GGATCCGTTGATTGGGAAGAGGTTGACCACACTGCACTCCTAGCCCAAGGCCCGCTT  
GCCGTCTCTCACTTCGAAGTGAGGCAGAACAAAGCAACATGGATGCTGCTTACCCA  
ACACATCGACGATGGCGAGGCTGCATCACTGAGCCTTGCTAAGCATCACCATATGA  
CCTTTGTTTCAGACGACAAGCTCGCCATTAATGCTGCCCTCGCACATGGGGTGCCAA  
GTGCATCTTGCTTGGATCTTCTTCGGACTTGGCAAGCACTCAGCCCAGAGCACGCGT  
TGAAGATCCCGCAAGTCCTCCGTCGCATCGCAACCCTTGCCCGCTTTACCCCGTCCA  
ATAGCCATCCCCACCTTGCGTGGTGGCGGGACCACTTTGCGCCTTGACACCATGAAC  
CCATCGACGGAGCCCTGATATGCCGATCACTGCTTTTTCAAAGCAACTCGAAGGCGA  
GTTTGATGTCATGCAGCTCCTGTCAAAGTTGAGCCCTCAGCATGACGGCGAGCCTGA  
CCCGACAGTCATTCCACAATCCACACGTGAAGCCATTGCGCGTGATGTTGTCTGCCC  
AGGCTGTGGCGCGGGGAATGCCAAGGTGGTTGTAGCAGGACAAGCTAGGCGAGGCG  
CCAAGCGCACCGTGAGTCAATCGCATTTTCGCTTCGATGACCACAAGCTATTCTGTG  
AGTTCGAAGACAACGCCACTCCATCAACCTTACCAGACCACCTGGTGGATTTCCGCG  
CATCAAGATCCGCGCAGACCCGCCTCATTGGCAAGCGTGTTTCACAAGGAATTGAA  
CTGGGTATTTTTTCTCAGGGCGATATGCGCCGGATGCGGCAGTGGTTCCTCGAACTT  
CGCATCATGCATTCTTACCGCTGCGAGGTCGACGAGGCCTTTATGCTCGATTTCTTG  
CGCTCCCCTATCGTGGATTCGCCTCTTGGCACCCGAGGTTCCACCCATCCATGCGGC  
AGCTTCCGAACCTTCAATTCCTCGGAGGTGGCAAGCACACAGTTCATCGAAGAAAATC  
CGGAGATATTTGATCTTTTGGAGCAGCATCACCCGCTTCACATCGGAGATCGGGATT  
CACAAGCGCGCGTGATCAGCACCGTGCGCCGAACTTGAATCAGCTCATCTACGAC  
CCCTCTGCCGCTAAAGATCAATTTTCACAAGTGAGGCAACTTGCCAACCTTGTTGCC  
GGCAATGAGGTGGATGCTAAGTGGCGACAGCATGTGTGCTTCGCGAGAGAACGCC  
CCAGGTCAGTTCGCTTACCGCCTTCTGTGCGCTGTTGCTGTTTAGCCACAACCTGGGAC  
ATGGACAAAGCCGTCGATGCGTATGTCCGGATTCGCATAAGTGAGAGCCCGCGAC  
CATCAACAGCGGGAACATTATTGGGCTCAACCCCTTTTACGACTACGACGCTTGGCG  
CCTCATCGCTATTGCTCATCAAGTGAAGCAACTTCGACCGAGCGGACTCAACACACG  
ATCCCGAATAGAAAAGGTTTCGCCAAGAGTTCAAAGCCATCTCACCTAGGCATTGTC  
TTTTATAGAAACCGTGAAGCCCTGCCCCAGACATCCGTTGAAGCTCTGCACGAAGGT

ATTATCAGTTGGCGTTCCAAATCGTGAGAAGTCCAAC TCCATCCCGTTGGCACACCC  
CAAACCCCTAATGAAAAAAGAGCCCCGCATGCGGGGCTCCTGTGTCGCTGGCGTTG  
AAGCCTTAGTCTCGGCGCCGGGTGCCGATGGCGGGCGACGTTGTTCCGATCGTTTGG  
CGAACCTTTTTTCGACAACCCTAGCTTCAGGCTCGCCGCCTCGACGTGCCATCAGTCT  
GTTGCGCGGCCAACGGTCAGAGTTATCTGAGCCGTCATAGACTTGGCTTCGGTGGCC  
GAAACTTCAACTCCCAATGCCCTGCCTCACCCCTCGGCCTGCGGTGGATGTGCATCCT  
CTCCAGATGCCTCAGGCGTCAGCACCTCAATCGGCTGCGTAGAGAAGTTCTTCTCCA  
AGGCCTCAGCCGCCTCCACCATCGCTTTTCGAGCCCGCTTGATCCGCCCCCTGCTGGA  
TCGCTTGGATGCGCGGGGAGACATGCCTCTTCGTTGCGGCCAAGCGCCGCTGTGCTC  
TGGCCACCACTTTCGTATTGGGATCGTATTCTTGCTCATAGAGCTTGGCTTGCGCATC  
TAGCACGGCCACGCGCGCCTTG TAGGGTTCGACCAGCGCATGGGCATACTTGCCGA  
TTGAGCGAGCAAGCATCTCGGTGTCTTCAAAGAAAAATGGCTTGGTGGCGTAGCTAT  
CCGCTCGCCGGCAAACGAGTGTGGAGTGCGCCCGCTGGA ACTCGGGCTCAATCTGG  
ATACCCGGGATCTGCCGCAATACTTCGAGAGACTGCTGAGCCACCTCTCGCTGGGCT  
TCGAGCCAATCTTCAATCAATTGAGCCTCCGCATTGAGCAACTCCGCGTCTTGTGCG  
CCCGAGGACCGAGCCAGACGCGTCACGCGACTAAGATGTCGGGTCTGACCGCTGTA  
AGGCGTATAGAGACCCGGGCGAGGCGCTGGCGCACGCGCCAAGCGCTCTTTGATCT  
GCCGCACCCGCTCTGCGCCTGACAATCGCCCCCTGCCACCTACTGTGCGCCCTTCCA  
ATCCAGACTCTTTTTCGTTGGCCCGATCCCGAAGTGCTGCCGCATGGCTATGAGACG  
GTGGCACCTCGTGCACGAGACCACCGCTTTTTTTTCATGTGCTCAGCGACAAGCTTTG  
AAAGCGCCAGTGCTGCTTCTCGCCACCTGCCCTCTCACTTCTGCTGTGA ACTTCGT  
TTTGCGCATCACCGCCACTTTGGCTTTGCCCAAGTGCTTGCCAGGCCGGCGCGTGAG  
TTCGCGGGGCGCGTTCAA ACTCTCCATTACGCGCGGCTTCGTGTGCTTGTGCTCGGAG  
ACTGCGATGATCTACGCGAGCCGGGTAGCCCGCATTTTTTCAAGTGCGCATTGATGAC  
CATCGCGATGTCTTTGCGGATTTGCCGCAGCGCTCGTGTGCCGCCCCCTTGCCGCGC  
ATCAA ACTCAGCGCAAGCGCGCTCCCCAGTCCTCCTGGGCCGACTTGTCGTGCTGA  
CATCAGCATATGCACATGATGATTGCGCTGATCACCATATTTGCTTGGTGTGTGCAC  
AGCGACCAATACGGCGACCTTGAACCGATTGACGAGCAATTGGCCAAGCGACAAAG  
CGAGCACTCTCCGTTGTTGTGGATCGAGTTGGTGCGGAAGCGACACCTCGACTTCTC  
GGCAAACGCGTGCGTTCTTGCGCGTCTCGGCCGCTTCGTTGCGGTTCCAAAAATACT  
GTGCATCAAAGCACCACTCGGGCGCTCCTTTCGGCGCAAGCATCTGATGGAATCG  
ACACCGCCTCGGTGGGAATAATTATGACCGAGCCCCGTGCTTGTATCGAGCAGATCA  
AACCTGCTCGGTAGGCTGCTGCTGCGACCGAAGAGTCGCCATTGCCTCGACTGAAA  
GACTTCATTGTTGCGTGATAAATAGCCATTTGTGAAACTCCTGTTTGTGGAGCACAC  
AAAGAAGCGGCATAACATTTCTGTCGAGAGTTAAGCGAGCTCGACAGCAGAGAGA  
CCTTGATCGCAAGGTTTTGAAGAGGCTGTGTTGCCTAGCGGAGCATAGGCAACGAG  
GTGGCGAAAGCCACCGCACCGACGCGCAGCGTTGGCGCACGGTTTCTGCAAAGCAG  
AAACCATAAGTGCGCTCTTGCTCTCTAATTTTTCTTTGAATTTTTTTTGGCCACAGTTG  
GATCAACCACGGCTCTTTTTACATATAAATATTATTTATACCAAGGAATGAATAAGA  
CCTGTACGAATCTGATTACGCCTCACGCCATGTGTCGTTTTACGCTGACTGTCCATGC

AGAAGTGATGTTCCGTGGTTTTTCAGAAAATCCAAGCAGCAGGACGAATTGCCGTCA  
GATTGGTAGCATCACCTCTGACGATCGAACGCTAAGTCGCAACAGCTGCGGAAACA  
AGGAAGCGAAATGCCCAATGACTACTGGGACATGGATGACAAGAACGACCCCAACC  
TGTTGAACCTTGCCAGCGTGAGCACCTCAATGCTCGTGCCCTTTCAGTGGGAAAAC  
TGCCAGATGCTTCCGTTCTCTGGCTCAATGAGCGCTGGTTTCATGACTTAGGCATACC  
CATCCACGACGCGCCAACTCGAGCCCGCATCTCAGCGTCCCTGCTTGAGTGCTTTGC  
CGTGACCTCTATCGAAGCTCACTGCGTTGCCGGCAGCTTCGGCGGACAGACACTGGG  
CGCGGATCGCTATGGTGGGAGCGGTGGGGCAATACACGGAGGGAGTGGCCGCTGTG  
GCTCCGATGGCATGCTCATCGCCAAAGGAACCGGCCCCACACCACTGGTCTCCGAG  
GCCCCATGATTGGTCACACTCCCATGGCTGTCTCTATCTTTACGACGCCATTCGCGAG  
GCAGTCGCCAGCGAGATCCTCAACGCAGAACTCCCCACGGGACAGTCCCCATCGT  
TGCCATCATCGATGCCGGCTTCTCCCTGGCGCGCACCGATGCCGACGAGCCGGAGCG  
GTGCGCCATTCTGATCAGGCCCCGCTTTCCTGCGCTTGGCGCACTTCGAGCGCAGCCT  
GTATTTTCGGAACATCAGGCAGCGCAAACAGCGATCAATTTCAAGATAGCCTGCGGG  
TCAGAGATGCCATCCACTTTGCCGACGAACACGCGCAGCTCGATGCCGGCAATCCC  
AATGGCCTAGGCGTTGACTTGTCTGAGCTCTACTTCCGCCTTGCCGAGCAAATTGCC  
GCAAGTCGCGCGCATCGCCTTTGGACTGGACGCCCCGACAAGCGACAACATCACATC  
GAACGCGCAGTTCTTGATTTTCGGCGGCTTCCGCGCAGTTCCCAGCTGGAAGCGTGG  
CACCGATGGACATCGTCACTTCTTCGGCGATGAGATGCGTGATGTTTCGCCACTCGCT  
TCCCTCGCTTGCCATTTTCTTCAAGAAGTATTCCCGCTTTGACAAGGCAATCGCCAAC  
ATCGATCAGCTGCTTATCCAGATCGAGCATCACATGGAAGCTGCGTTTCTCCATCAC  
TGTGCAAAAAGCGTGTGCCTTGCCCTCAGTCAAGCCCAGAGGCGTTGCATTTCAAAGCG  
CTCATTGCGCGCTACTACCGCGAGCAACAGCGCATTGACTATGCGTTTCGATCAGCCC  
ACAAAGCACGGCGAGCGCCACGATTGGCTCTCTGACCACATCAAAGGCAAAGCAAC  
CCAGGGCTCTCAGACAGGCGAGGAGATCAACTCGCTCCTGCGCGCAATTCCGAACG  
CAGCTCTCCATCTTTGTGCCGCCAACCGCTGGCTGAGACCACGACCACGCCTTTTCT  
ATCGCGTCTCCAAGCGCCGGGCGATCAAGCTGGTGCGGTCGATATTGGCCGATCGGT  
CGTCGGGACCCGAGCGGGTCTCGGCCTTTATCGCAACCGAGGTCGCGGTCTCGCGCC  
GTGTCTGGAAAGGCTTACCACCACACTGGCTTGTCTTGGGCTACGCAAGCGATCACG  
TGTCACCGCTTTGTATTTCTTTGATACGCATCGTATGGCCTATACAGTCCAGCTGGA  
GGGGCCACGCGTGATGGCGGAACACTGCTTTTCGGCGCCGAAGTCGCAGATGAGA  
CACTCGGCATCACCAATTCTGGCCATAGAACCGTCGCGTGTGTGCGACTGCGAACCCA  
CCAGCTACCTGGTAGGTCTAAGCTTGAACGGGCGTGATCAATCCCTACCGCACTGC  
TCACCTTCCCCGACGCTGCAGTTGCAGCGCAGACATTGAGCTCAACCACCGCCCATG  
CAACCTAATGCCGTTGATGCGCAGGCGCTTGGCCTGGCAATGCAACTCCTGTGCAAG  
ACTGACCGCAAGAAGTTCAGTATCGCAGCGGCTTATGTGTGGCTATGGCCTGCAATT  
CGCCTAGGCCAGCTCGTCACGATCGAAGACGAAGACGGGGTCTGGACCGGCTACGC  
CTTATGGGCTTGTCTGACGCCTGAAACCGCCACTTATTTGGTTCTGCAAGATCCGCC  
GTTCTTGCCAATTAGCGACTGGAACGAAGGTGATCAACTCTGGATCTTGGATTTTCGT  
GGCTATGCCAGGGCATCACCGACGCCTGGCGAGAGCACTCCGGCATCGCTTGCGCC

CTCACTTCAAGCAAGCGTATCGCTTGGTGCGAGATAAGACGGGCGCTATGCTGGGA  
ACCAAGACTCACACACTTCGCAAAGATGGCTGAGGAAGACACGTTGCTTCCTTGATA  
CGAATGGACGAACCGAAGCGACAAGGCAGTTGCAGCCTATGCACGAAGTGACATCA  
AGGTCGACCAAGGCCTGGACTGGATTTTTGTTCCTGGGCTTCGGTTCTGGTTTGCCCT  
ATCCGCTGATCGGCAGCACCTTAGGCTATTGGCTCAGCGAAAAGTCGCTTTCGATCG  
CAGTCATCGGTGCCTTGGCTTGGAACGCACTTCCTTACTCCCTCAAATTCCTATGGGC  
CCGCCATCTCGACCAACGTTCGTGCGCCGGTCGTTGGAAGCACCACGTCGCACCGTCA  
AGGCTGGATTGTCTTGTCTTCGATCATGGTCGCCCTCTCTCTCCTAGGCCTTGTCTTG  
AGCGTTGTGCGCGGCAGCCTTCCGCTGATTGCGCTGAGCTGCATCGCAGCAGCCTTT  
GGCGGCGCGACCCTGGATGCCTCAGTCGATGCGTTCCGGATCGAACAAGAGGCAGT  
GCACCAACAGCCAGCCAAGCTCCTCACTGCCTACCAATTTGGCTACCGTATTGCTCT  
ACTGCTGAGCGACGGTCTGGTGTTCTTGGCTGGCGGCGCGGCTGTCCTGGCAAGTTGC  
TTATGCAATTCTGCTGCCCCTGATGTTGGTGCCCATCTGCGGAACGCTCTTTCTGCGA  
TCTCATCCCGATCGCGTCTCACCCAGGTGCGACGAGTGCGGAGAAGCAGGGGGC  
TCCGTTGGTGTCGCTTCGACCCTCCACGCTCCAAGGATGGATCGCGGTGGTCGTCTT  
CATCGGCTGCTATCGCCTACCGGACATTCTTCTGGGTCCCATGATCAATCCCTTCTTC  
TATGCCCTTGGCATTGGAAAGAGCGTAGTCGGATCTCTCCATATCTGGCTTGGAAATC  
CCAGCAGCCTTCCTCGGAATTTTGGTTGCAGGCACCAGCTTGAAGCGCATGCCCTTG  
AGCACGACCATTCTTGTGGCGCGGCTCTCCAAGCCCTTGCCCTGCTCGTTCTTGCA  
TGCTTTCGTCAAACGAGCAGTCTGCTGAACTGCTTTGGGCTAGCGTTATTCTTCAA  
ACCTTGCCAGTAGCTATACCGGCATAGCCCTGGTTGCTTACATGTCAAAGCTGGTCA  
CGCTTGACGCGCAGGTGAGCACTACGCTTGGCTAACCAGCTTTTACTCCATCTTCG  
GCAGGGTGATTTCCGGCTTCTCAGGCCTTGCAGTGGCTTATCTCACCACGCTCCATG  
GACAAAGCCAAGGCTATGGCACGTTTTTTCATTGGCATCTGTCTGACTTGACACCTG  
CTTTACTTGTCTACTCGGCATTTCTTCGAAGACAGATCATTAACTCACTTCCAAGCC  
TGAACGATCCGGACACATCTAGTCCGGATCATTTGACCAGCAATCTAGGGCCTGTTA  
ACACATCCGAAGCCCATCAACGACTAGGACGAAGCTGAGGAATCCAAGGAACATGA  
CATCCAGCTTCTCGAAGCGCGAGAAAATCCGGCGGTAGCCTTTCGAGCGACGGAAC  
AGTCTCTCCACTTCGTTACGCCGCTTGTACATCTCCCGGTTGTATTCCAAGGCTCGA  
CCCGATTGGATTTTCGGCGGGACCACCGGCA

>CONTIG\_24\_length\_11740\_cov\_27.610523

TCTCTGCACTGCAACGCTGCGCAGCATCGAGTATGCATTGACGAATCAGCGAGCGGT  
CGGCGCGGGTCATTCGCGCCTCCTCCTTGTCTCTCCCCCGGTAATCATCAAGCGTG  
CAGTGATTTTCGAGCTCGCCCAGCACGTCGCGTTGCTCATCGCTGGGCGTATCGATCA  
GTCGATGGGCATCAGCAAATGGCGCAAGACTCACGCCAGAGCCAGGCGCAAGCTTG  
ACCCGGTTAACCGTCAGTCCAAGCCGCTTCGCAAAGTCACCGAATAGCCCAAAGGA  
ATTCCCTGCCTCCACGATGAAAATGCGGGGCCGATAGATTGCGGCAACCTGATTCAG  
GATGTTATTAGAGTTGCAGATTTGCCAGATCCAGTCGGGCCAAAGAGGAACAAGT  
GGGCGTTCATTTGCCGATCAAGCCGGTTGAACGGATCAAAGGTAATGACCCCGCCA

CCTCGGTTGAAAAAGGTGATGCCAGGATGTCCAGTTCCTTGGCTACGCCCCCAGACC  
GGCGCCAAATTCGCTGCATGTTGAGCGAACATCAGTTGGGTGTACCACTGCCGGCGA  
TCCACGCCTGGGTTGTAGACGCAGGGAAGCCAACGGAGGTAGCTGTTGAGCGGCGC  
AACTTCGTCTCTCTCCCGTACAGGCTGCAACCCGGCATTGAGCATGACGTTGGCGAG  
CTGAAGCCCACGGCGATCAAGCTCGGATTCGTCACGTCCGTGCAGATAAAAGGCCA  
ACGTGCCCCGATACAACTTGTGAGCGCTGCCAATCAGTGAGCGGGCCTCGTGCACGT  
CCTTGAGTGCTTGTTCGAGGGCGAGGGTTTCTCCAACCGCTTTCTTGGCCAAGTGTT  
GAGGTGAGCCTCCAACACATCTTGCGGTGTTGCGACGAGCGTAAGGCACAGCGTCG  
TGTCTTCCGGCATTGTTGGTCGAACAGAGTATTGATAGCGTCACCTTTGCGGGTTTCGCC  
CGTGAGGTGGCCGGTTACCGGCGGCATACGCAAACGGTCGGTGACCATCACACGAT  
GAGGGAGGCTATCGAAATACCACAAGCCTTGATCGACATCTGAGCGTGATGGCCG  
AAGAACAGCCGCTGACTGAAGTCCACCCCGCTAGCCAGCTCAATTTTCATCAGGCTCC  
GGGGTTTGCGGATAGGCGGCAAGCTGGTAGAAGCGCTCGCGGTCTTGGCCTCGTGT  
CCCAGTACCGTCGGGTGTGGATTGAACCATCTCAACAACACGCATGGATTGCAGGT  
GCACCGAGCCGGTTTGACTGAATGCCGGCGTTGCTCAAACCACCTACCAATCGATCG  
CACACAGTATTAAGGGCTTGCTCGGGCGTCTGTCCGCGACGCCTGCTCTGGCTTGAA  
GACCGCCGGTACACCACCATTCGTACGCGACGGGTCTGCCCACGCCAACGAAGACG  
TGTCACAACGCTGTCTCAAACAAGCCACCTGGCTTCGCAACTGCTCGCAGGTGGTG  
AGCAAAAAACCTGAGATAAAAAATTCGTAAATTTGACTCCTTCGCACGGGGCTGAA  
TGTAATCGTTCAGCGTCTGAAGGTATTGGTCGAAGTTTGCCTCGTCCTGAGCATATA  
GCTGGACAACCCAAGGATTCTCGTCGAGCTCGTCGAACTGTCTGCAGCGCATTCT  
CCAGTGCATCACGGGCTTGAGCGAGCCATACAGCCTCTCGCCCCCTCGGTGCCCAGCG  
GCGTCAGCTCAAAAAAAGCGGCGACTGACTGGCCGTCTTCGAGCAGCATGCACTGT  
GTCTCCGGCAGGAACTCCACCCAAGGCAGCAGTGCTACGAACGACGGAGCCACATC  
ATAAAGTGCCTCCTCGTCGTCTGAAGTAGCCGGGGACTCGCGTGCAGCTTTACCAGG  
AGCTTGAATGCCTGCCTCGCGCAGCGCTTGTAGGTAGCGCTGCCAGCCGTGCGGGCT  
TCCATCGGGCGTCAGGCATGGAATGGCATGCTTTTGGGCGTAACCAAGGGAGCGTCC  
AGGACATCAGTAGTCCTCCACACGCTCGCCAGGCATCGAGTACTGAATCCGCTGGTA  
AAGCGGAAACACAGTCGTATAGCCAGGCACCGGCACAGGGTCGGTACCGGTCAAAT  
GTGGGAACACATACATCACCAGATCGGGATTGGGGAGGCGGTGAACTGTCGATAG  
ATTTCAATTGGACGCCGTGCGGGTGTAACGAGATTGCTCTGAGGGAGCTTCGGCCAAG  
TCTGCCTCTTGCAAAGGCCGCCGACGCTCTGGCGTGCATCTAGCAACTGGCGACCA  
GCGACCTGGCCTGAGCCACCATCACCAGCCTCTTGCTGCCAGATTTCTCCTGCATGCTT  
TGTCCTCCCATGGGTCAACAATTGCTCTTTGTCGGTCGCGCAGCCGACGAGCGCCACC  
GCTGCCATGGCGAGCACACGGGTTTAATCCAGTTCGAGAGCATGGGCTTCTCCTGC  
ACGGTGATCGACCTTGCGGCCTTTGGGGTCGTAATCGATGGCTAGGGGCTTATCGAG  
GTGGACGGCGACTTTGGCACCTGGCTGTACATACACCGCAGCGAAGGCCTGGCCGT  
AGAGTTTGCTAACCCAGCTCGACATTTCTTGACACTACCGGCCAGGATCCGGCCGA  
CCGCTTCTGACCAGTGATGCCGACGGTTCCGACTGAGCCATCGGCTCCGACATAGG  
AAGCCCGGCCACTATCAGATTCGATCATTGAAGCGACGCCTGCGCCGGCAGCGGTG

ATCAGGGCTTGTGAGCCCAGATATTGTTGCGCGTTGCTGCGACGTTCCGCCGTTGACA  
CATGGGATGCCATAGGGATCGCTGATCCAGCCAAGACCTTCCTGCTGTTTGTCACTC  
TGCTGGTCGCCGTCCTCGGGGATCGTGCGGATGGTGCCGTCATTGAAGACA  
AAGGTGATGCTGCGCACCTGCCACGCACGCAAGAAAGCGTCCAATCCCCTGCGGC  
AGTACCGCTGAATACCGCCCCCGCCACATCAGGGAGGTCGATGCCATTTGCGGTCA  
GGTTATCCGGGCCCACCAGTACCTTGAATGGATAAGGATCGTTGACAGTGCCATCGA  
TCGGGACTCGACCGATCAGTGCAGTCATCGCCACCGAGCCCATTAATGTCGAGTTGG  
TTGGCACGGTGTAGACCGCTCTGGTTCGTGGCTGCTCCGACGGCTTTGGCGCTGGCTT  
TAACGGTTGATTTCGGCTGTTTCTTCCAGCGTGCGCTGGGCCGGGCCAAAGCTGGTTG  
GAAAGCTGGGTGTATCCCCACCGCTTCGTCCATCAGTCTGCTTTTTGTCTTCGGGTTC  
CACCCAACGCATACCACTGCCGGAGCCAGACATGCCATCGGCGTCGCCATCGCGTA  
ATCCCAGCCCCACAGGTAAATCGGCATTGCCGCCGGTGTTGCCGATCTTGCCAAAC  
GCCGCTGCAAATCCTGTAGCAAACCTTCGGTCTGCTGGCGTTCTGAGTTGAGCTGTT  
GCTGGTCACGACGAAGGTTGGCGCGCTCGGATTCCAGCGCATTGCCAATGCGTTGAT  
CGATTGCCGATTCACGCTGGCGAAGTCGCTGATTCTCATCTCGTTGCGTCTTGTTGTC  
AGACGTGGCCGTCTGCAGCTCTGTACGCAGCTGCTTCACCTGGGCGACCAAGGTGGC  
TACCGTGTGCGGTGGTGTATCGCCCTCAATGCCCAGCGCCTTCATTTCTTCAGGGGTG  
AGTTGGGCACCCGCATCGGCGGTGGCCGGGGCCTGATGAGCACCGCCGCCCGAAAA  
TTGCCTGATGCCGAAAAACAACACCAGCAGTGCCACTGGAATCATCAACCACTTCA  
GCAAACCGTTACTGTGCATGGCCATCTCCTTGCGCAGGCGCGGCCGGTTGCGGCAGG  
TTTACTGTTGGGTCAAAGCGCTGGATAGCTGGTAACAGTGACTGGGCCAAGCTACGA  
CCACGAGTGACCACGTAGACGACTGTGGTGTCTTCTGACTGGCCGTGCGGTCTAGG  
GCCGATGCTGGAAGGCCGCAGTCAGGATGTCGCCCTGAAGCGTACGCGGGTCAAG  
ATCGATCCAGGTTCCACTGGTATTGGTCAACTGGACGGCGGTTACCCATTGGTCCTC  
CAAGCGCCAGGAGGCAAGCGCAGTAGCTTTGACCGGCAAGGTTCGGTAACAGTGTCT  
CAAGCGGTAGGTTACGGCGCAGGTTACCCCGAGTAACTCCAGGAGCCGCTTCGACA  
GTACGTAGCGGCGCATAGAGATTCTGGGCGGCGTATCGAGTGAGGACTACTGCAAC  
CGGAGTCTCGCGTTTGTCTTGAGCGGGCAGGGACTTGATGTCCGGATCAGCATCTTC  
TGCCTCGGATGGCTTCTCGCCGTAGCGGGTTGGCGTGCTGGGACCATCAACGATGCG  
CACCGGTTCCAAGGGCGGAACGCCCTCACCCCCAACCTGGGCACTGATGTCGAGCA  
AAATGAGGGCCCCGGTATCGGCATCTTGACAGCTGCAGCCGGGTAGGCTCGATGGGT  
GCGTTTGCGCGCAGATAGACTGCGCCGCTGCGCTCTGGACACGGAGACGCTCGCCT  
ACGTTAGCCGGCACCCCGATGCGGACATTGCGATCAACGAATACGATTCGCTCTTGG  
TCTACGACCAGCGGAATAGCCAGAGGCAGCCGCTCCCAGGTCAGGATTTGAACCGC  
ATGAGCCTGGGGCGTCATCGCTATGGCAATGACGCTGCTAAGCCAGAAGGCGAATT  
GATGCTTCATGGTTTCTCTCCTTGGGCATCCAGGCCACTTCGAGTCGGCGCAGGATC  
AGTCACATCGGGTGCTCCAATGCGCTGAGGCGCGCCGTCATAACAGTCGATCGCCA  
GACCGAATGGGTTGCGCGTGGGATCCACGTCGGCCCTCACCACTTTGATCAGATAGC  
GCACCAGAGCGCGCTTGACCTGTTTCGGAGCCGTAGTACTCGTCCGCGCTGATGTCTA  
GGGTGACCACCAATCGCGCTCTGATACGACGCGCACGCGGAGCCCAGGGTTGTCTG

CCGTAGCCGCGACCTGGAATTTTCATAGATTCCGCGCACACGTTTCGCGCAATTCACCC  
GCGTTACGCCGATAGTCGTAATCGGCCTGAAGGAATCCCTTGCATGCAGGCGTGAA  
GTACGGCGAAAGCGCATGCAGGTTGCGCGCGTAGTCGTTCTCGCCATTGGTCGGCCA  
TCGGTTGAGTTGCTGGAATACGTAGAACGTGAAGGCATACACCGATTCCGGCGGCA  
CCTCCCACCACTTGCGTGTGCTGCCAGAGCGCAGATCCGGCGGGACATGGACGGTG  
AGGTCGCGCGGCGCGCTCCACCAGCCACCGCCCATGACCAAGGCAATAATCAGCAG  
GGCTCCAACGCCAAGGCGCAACGTCTTGATGTGTGCCTGTAGGTGCATGACCTCGTT  
TTTGAATCGGCTCATCCTGCTTTCCTTCGAACCGACCAGAAACCAGAGCGGGTGACC  
AGCGCCTGCCACCAACCCAACCGGCGACGGTGGGGTGACGCGTCGTCAACCACCA  
CTGCAGATGTTCGGTAAAGCCATGTGTTCGGGTCGGCCGCGCTTCTGTTCGACGCAGGAT  
GCCACCACCAACGAACACCCCAATAGCTACCGCTGCCACCATGAAGGTTCGGTGCGA  
GCGCTATGGTTCGAGAACATCCAGGAAAGAGGTCCACCAACCACAGCCCGGTTCGCG  
CCTGACAGGCCGCGAGCAGACCCACAGTTCATCTGCGGTTCAGTCCACCCACCACCACC  
GGATGACGGTTGAGCCGGTGCGGCAAGAAAGACACTGTGCCGTCTCTCGGACATG  
CGGGTAATTCGGACATGACCAGCCGCCTTACAGGATGCCGGTGGCTTCGGTGAGCAG  
CCAGATGCCGACTACGAGCAGCACAGCGCCGATTGCCACCGTCAAACCGAATTGGC  
CCCAGGTCTTGCGACCATTGTGAATCTCGGCGTAGGTGCCATAGGCGTGGTAGCAGA  
CCCCGATAAACATGGACGCCACCACCAACAGCGCCACCAGCAGCACGATGTTCGTAG  
CCATAGTTACGGATGGTCTCCATGATCCCGTTGCCAGTGCCGCGCGAGGGATTCTCC  
AGCGTGGGAAGCCCTTGGGCTGAGGACACAGTTGGTAGACCCAGTACTCCAAGCGC  
AGATGCCAGCCGGAGAGAGATACGAGAGGAGAGAAAGCGCGTCTTCATGTTTCGGTC  
CCTTCAAGATCAAGAGAGGAGGAAAAACGTCAGCACGATGTACATGGCAAAAAAG  
CGCACCACGACACCCAGGAAGTCCGTTGGTTGATTTCGGCTCTCAGCCCAGCCCACA  
TAAGCCGTGCGGATCGCCCATGCGCCCCAAAGCAGCAGAACGGCGAACACCATGCC  
GATCAGCACCGCGGTTCATCGCGGCGGGTGCAATACCGCTGTTGGCTTGAAACGCCG  
AGACCTGTGCGCCGTTTCATGGGTAGGAATCGGTATCGCCGGGCTGGCCCTCTGCCTG  
TTCGGCTCGGTACTGGCCGACGATTTTCGACCGGATCTCTAGGCTGGGCACGTGGCGG  
CGTGAGGTAGTCCTGTAGACCGACACGTACACGTGCTACGTCGGCGCGCAGCCGGC  
TGTAATCGAGGTAGTAGCGCTGGCCGGGGGCAACGACAGTTGAGGTTTCGCTGTTCT  
GGATCAGGCGATCCAGCGCGTCGAGTTGTCGAAGTGCCGCGGCGATGTCCTGGCCC  
TGAGCAGGCGGGCTGGCTGCAGCTGCAAGGGGGGGCATGACCATGAAAGCAGTCAA  
GGTGAGTGCCGGTGCGCTGCAGGCCACATATCGGCATTGAAATGAACGCACCATCG  
CGCCCTCCTCGTCAGATCAACAGTTGAGTGATCGTGACCGGGAGTGACATGCATAC  
TGCAAAGAATAGGGACTCAGCGAGCCCGGATTGATGCCCGAAGCCACTGTCTATGC  
GTGTGTCTAGCAGTGCCTGACTTGATGCACGCCTACAGGATTGACCGTGCCACTACG  
AGTCGAAGGAAGGAATAGGAATGACATGCCTGAGAATGCCATGCGTGTTGTTGGGC  
GCAATATCTCTTTCAGTTACCTGGCTCTGGGGGCAACTCAATGACAAATTCGTGCC  
GAACCAAGCCGTAATCTGCCGCAGTGCATTTGGACTGAGCAGTTGGGTAAACAATA  
GTGCCAAACGTATCTTTGGACGTGAGCACGCCACGTAGAAAAGGTTGCGATTGTTTT  
CAAATCGCGCACGCTTGTCCGAGGCGGCTCAGCCTCACACCATTCGAGCATTTCAG

CGAAGTTATACTCGTTCCAGCCGCGCCCTAGGACAACGACGACGTTCTCAAACCTCAG  
CTCCCTTAACCCCATGCTTTGTGCGGAAAGGCGTGTGCCCATCGATGAACTCATCAA  
GTGCTATCAATTCACGATAAGAAACCCCCCGCAATTTTCGAAGCTGCGTAACCCGCC  
GTGGTTCCTTCGTCACCTCTCCCCCAGCAGCCTCCAACCTTTGCTCGTTCCGCAC  
CAAGGCATCGGGCAATTGTATTTGGGGTATCCTACGGAGATAATCTATTACGTCGCC  
AATAGTTCCTGTCAGCCTTAGCTCGTCCAGTGTGTCCATCGCTTCGACCCACGCCACT  
TTATCGCCATGCTGGCGGATTGTTGGACGGTCACTCGCTAAGTGTTTGAACATTTTCG  
CCATAACGACGCTGAGCGTATGCCGCGCAAGCGGGTTCAAAATGATCAGTAAGGTA  
CTTTATGTGTGGATCTTCCTTTCTTAACCACGACTCATTGAACCGCCCATAGATCGGT  
GGAATAGACTCGTAGCCCTGCTCCCTGGCGATGCCGCTATGGTTGAGTATCAAAATC  
TTGGTTTTCTTGGGCGAGAAGTCCCATCCTTCAGCTATGAGCCGCGCTTTAAGGTGT  
GAAAAATACGCCCGTGCAGCTTCGGCGCTAGTATCACCTTTCCAATGCCCGCCACCC  
TGTCCTGTTTCGTCTGACGCCAGGCCAACAATTGGTGTGAAACACCCGCGCCTCACCG  
ATCAATTCAGGGTCACTTACCATCTGAAAGTAATTCAGGCCGCATGTGATTAAGCACG  
TCGACAATGCGAGAGGCAGATCGGAAATTCGCATTTTTGTGCGATCACATGAAGAGCT  
TCATGTTCAATCAAGCCACAACCTGAACCGTAGATTTTTTGCCAGTGATCCCCAAAT  
AGACCAATCAACGGCCCTTCTTTACGATCCAAAAACCATGACCTTAAAGCTTCGAAG  
AACTGCTCATCCGTGTCCTGATACTCGTCGATGAATAAAATGGGATATCTCGAGGTG  
ATCACCGCCCTGAATTTCTGCGACGGCAATGCTTGAATCATCAAAGTGAGCACATCT  
TCGTGCCGAATCGAGACTTCTTCGTGAGAGACCCTAGGGATGCCCATTTTCGTAATGG  
ATTCGTCTCCCGCCTATGCCTCCCAGAGGTTCAAAGCGATCTCGCCAAAAGTCTTGG  
CCACTGAGGAAGGTCCGAAGAGACGTCTGAAAATCCTTGAGAACAGACCAGCAGAA  
GCCATGCACCGTATCTGCTCGGATCGCAGGGTGGGCCTGAAAACGAGAGATGATTT  
CGTCTTTCGCAACATTAGTATAGGTGATGCAGGCAATTTGCTGCCCCTGACGGACCA  
AGGCAGTTCCCCTACCTTCGATCAGAAGGCTCAGGGCCTTCTCAAGAGAGTATGTTT  
TGCCCGCACCTGCTCCGGCTTCGAGTCGAAAACCTTTGGCCTTCGTGGAGACATGCGA  
ACATGCGTTCTAGTGCTTGTGACCGGCAATGTCTGCTGGGCTCTCTTGATGGTTAA  
GCATCACCATTCCTTTTTTTCAGTGGCTATTATCTGACCGGCAGCCTCTGCGACGGCG  
GCCATTCTTGGACAGCTACCTGCACATGGACAACTGGAGCGCCAACGGCTAACCA  
CCTCAATCCTTCTGCGATGTATCGAGGCACCACCCAATTCGTATCCTCAATCGCATA  
TTTCAGAGCGAACTCAGATTTTTTCTGATCAGCCGCATGCCTATAAGCCAAAAGCGC  
TGCATCACCATGGCCTAAATCAAATAGGCCCAGATTCGCCAGAATGAAGGCGTCCT  
CAAAACTTCTGCCCCGATGGTCCATCGGCTACATCAGGTACCTGGTATGCCAGACGCC  
TAGCTCCCTTCGTCTTCTCTACCGACGTTTTTTGCAAGCAGTTGCGTCGGAGAGATGTT  
GGGTTCAAACCAGTCCTTGAGGCATCCATTGCTGGTGAACCTGACCTTCTGCCACGGG  
ACAAGCCTTACGTTTGTTTTCTCGTTTGGCTTAACGGAATCGATATCCGTCACAATC  
AGGGTACGCAGCTCCAGAAACGAGAGAAGGTCGTGGAACCGGTGCGCATAACGCCCC  
ACCAACTTCCATCACGGTCACGTATTGACTAGCAAGCTTGGGTTCACCGACCGCAGC  
TGAGTCAGTTTTGGCAATCATGGTCGGCAAAAGCAGACGCTCAGATGTGCCTTCAAT  
CAAGATTGCCTTGTCTGCAAAAAACAGATCACAGCGCGTGAGCGTGAGGTACTGGT

GCAAAAAGTCTCTATCCGGCAGAGACACGCCACCCATTCCCTGTCTGAGGTCTTTGA  
TTTTGGACTGCCGGACACCGTGTTTCATCGGCCGCTGACAAGAAGTAACGCATAGTTT  
CAAAGCGCGCCTCGTTGGCCATATGCGGAGAATGAGTGGAATCACAACTGCACT  
GGCCATGGCCGACTGTCGTTCAACTGCCTCTCAAATTCCCCTTTGATCAGATGGAGC  
TGACGGATGAAAACCTCCTGCATCTGGGGATGCAAATGTGCTTCAGGCTCTTCGATG  
AAAATGAGGTGGACACTTGCCGCTGCTGGCGTTGCCTGAAACTCCCTAAAAAATTTT  
AGCAACTGAAGAAGGATATATACCAAATTGCGCACGCCTAAACCGTTGTAGCTCTCC  
GGCAAAGTCAGTCCATTTACGCCCCGATACCTAACCTGCGTATGGTCTTTAAGCAGC  
CGCTCGACATCGAAGGTCGTGACGGTTGTAAGGCCAGGATCATCGAGCCCCGGGTA  
TCCAAACAGCTCGAATGTCGGGAGTAGTGATGTCAGACCGGCGTTGAAGCCGTCAT  
GAAGATCCTTCTGAATTTTTTCAACGGCACCGTGAAGTTGTTTCAGCGGTTGTGCGCTT  
TTGAGGATCGGTCCGATCCGTCAAGGCCGACTGGAAAAGCACCTCAACCACTTTGC  
CAAGGACATCGCGTTCCCGATGGGTGTCATCGTCTAGTCCGCGTTGCGCATTGATGA  
ATCCTCCGCGGATCAGGGCGTTGAGATATCTGAGTTCAAGACTCTTTCGGTTAATAG  
GGTCGTTAGGGTCGACAGCTTCAAGTCGAGCCTCGTATGACGAGGCTAGGCGTACCT  
TGATGAGATTAAAAAACGCAGACCTGTCAAATTGTTTCATCTCCAGGTAGCGGAATTG  
CCTCGAACAATGAATCCAAAGCTGTAGGCTTCGGCCCATACGTGAGTACGATGCGC  
GCGCACGAACAATTTGGATTAAGATCCACGATGCACTCGCTGAGCGAACCCAGATC  
CGGCGCCTTGATGTCGTAAGAAATGTCCAGCGTAACTTGACAGCTGGAAGAATTTT  
TGCGACGTCGGCACGGGGGACACCAATTATGTAACGCATCAAATGCTGTCCAAAACC  
GCTCGTGGCAGCCGAGGGAAAAGTCTTCTAATTTGAAAGAGGGAGCCCTGTCCGAG  
AGCAACCGACGAAATACCTCGGCAATAGACGTCTTGCCACAGTTGTTACGTCCCACA  
ATCAAAGTGTTCCAACCTTCAAGTCCAAGACTGACGTCTTGAAGCAACCTGAAATTC  
CGAATTTCAACGCGCTCGATCTGCATGATGTCCCTACCGTGAAATCGTATTGCCATC  
AATGTAGATGCAAACGCTGGATAGTCAATACCGACTCAAGAGTGCACTTTGACGTC  
AACGATCAAGAGCAGCTAACAAGACTCCTGCTCCGCCGTCAAGCGAGCGCGGCCAT  
GCTCGGAATCGGCTTGTAGCACTCGTACAGTCCGGTTCCCGCGCGCCCTTCCGCACC  
CACCTGACCGCTGGTCGCTACGTTTTGTTCGCCGCTCCAGCTAATGTGGCTTGCGGTT  
GTAGCTTCAGGGCATATCTATAACCGGCAAATTCGTTAAAGAGCTCCCGACGTCCCC  
CCGACTCTGATCCACCACTTCCCCCTGCATGGTCAGAGCTTGACGATTTTCACAGAA  
TACTGCTTGTCAATTGCCCATCAACGCCAGCAACTGAATGCCCAGCGCGCAATACAAT  
GTAGTGATCCGAATCTAGGCGAGCTGATTTTCGTCTATTGCGTTGGCCTATGACCCCT  
CGAGCATCGAGAATCCGGAACCTGGCCCGCTTGATTCTGGTGAAGAAGTGCTGGCGC  
ATAGTCTCCGCTCAGCCCGGAAGTCACGAAGCCCTGATCTAGCGCCTACAGCACTTT  
GGTGACCTGAACTGTTTGTAGTCCGCGAAGGTAAGTGCCTTTACCGACCGCAACAGG  
AACTTGCCCTAGCCATGCCCAACGTATTCCGGAGAAAATATCGTGCGTGCCTCTACG  
ACAGAAGATTAAAGGTACTTTTTTAAAGCTACCAGCGGTCAGGTTTCGTCACAAATCCC  
AATAGCGCAGCGCTCGGGAGCAAGATGAGCAGCGGGTGGACTGAAATCGGTAGCGC  
CAAGTAGATCACCCAGGGCAGGATCGCCAGCGGCATGAGCGAAGCCTTGGCGCGGT  
GGTAGA

>CONTIG\_25\_length\_11605\_cov\_15.467852

GGATCAACGCGTGGACAAGCTGAGTAAGACAGACGCTGATTTGCTCATCGCTCGCCT  
GACGAGTGCCGAGAACCCTCCAAGAACTGACACTCAACCGCACCCGCCAGCCAGATG  
GGACGGTGACGGAGCAATGGCAGATCGATAGTCCGAAGGACTTGAAGCTGTATCGG  
CAGCTCATGGAGCTGGAAGCAATGGCCGGCGCTGCCTTGCAGGCTCGGGCAGTTCC  
GGTGGCCGCGCCAACCATGTTTGGCTCACCGCATGCGGGCCCCGAGTAGGCAGGCCT  
CTGCGCCGGCCATTGAAACGATGACGCTGGGCAAAGCCCCTGACGCGTTCCTGGCG  
ACCCTCAAAGGCTCGACGCTCCCGAAGACTTACACCATCAAAAAGACGGCGATTGA  
GGCATTGGTTAGTTTCCTCGGGGAGAAGGCCAAGGTCCACGCCATCACCCGGTCCG  
ACCTGGCTCGCTGGTATCAGGAGATGCGGGAGAAGGGCGCTTCCACGCCGACGCTC  
ACGAACAAACAGAGCTACATCGGCGGCAAGGGCGGGTTCTTCGAATGGGCCATGGC  
GTCGGGCCACTACCCGAAAGGGCGACAACCCTGCTAGCGGCCACGTCAGCTACTCCC  
AGCGCGAAAAGCGGGCCCCGGAAGAAGTTGGGTTTCAAAGCGTATGACCGTGCACAG  
ATCCAGGCGCTGTTTGCGCCGGAGGCGTTGGCCAAGCTGTCCGAGTCGGCCCCGTTGG  
GCCTCGCTCATTGGACTCTATACGGGGGCGAGGGCATCTGAGGTCGGCCAGCTCCTC  
GTCAAGGACGTGTTAGAGGAGGACGGCATCCCTTGCATTCTGTATCTCGGATGAAGG  
CGAGCATCAGAAAGTAAAGACTGAGGTGAGCCTTCGAACGGTGCCGCTCCATCCCG  
AAATCCTCGAAATGGGCTTCCTGGATTGGATCGATGGCAAGCGCAAGGTCGGTGAA  
ACGAGGCTGTTCCCGGCAGCTAAGGCCACGGCAGTCAACGGGCAGGGCAACTGGAT  
CACCAAAGCGTTTAGTAGACATCTGGCCGAGGTGGGGAAGGGCTGGGTGCCGGCAA  
AGCGAGGCTTCCATTCTGCTCAGAAAGACGTTTATCCAGGAGCTACAGGGGGCTGGT  
GTGGTTTCGGAACCTCCGGGCGCAGATCGTCGGGCACGAGCTCGATGATGAGCATCA  
TGCGACATATAGCCGAACCTTTACTGTGGTTGAAAAGCTCACGGGACTGGGGGCGC  
ATTCTCCTGGCTTAAGTTCCCTAGCTTGGAGCTCGCGGTGACCCAGCTCGCCTAGTC  
GATGCAAAGATATGACGGTGAACCTATTAGCCGGAGCTCGGGCGATCACTACGTCA  
GATTCAGAAGACACCGGCTAGCCTTTTATCGATACGGGATCGCAGGCTGAATTTGAC  
CTGGCTTAGATTCTCTAAGTTTAGGTTCCGGTTTCGCTTCCCATGCATCAGCGGGGC  
AGCTTGAACGACGATATACAATGTAAAGGGCGGAGTGTGTTTGTGTAAGCGGGAGG  
AGATTCGGGTTATTCTTAAATGGGCTTTGGTTCTGTGCCAATCATTTAGTGATAAGG  
ACTTCTAGCAGGTGAGTTTTATGTAAAGGAGCAGCCATGTCTGAGCAGGAAAGCGAT  
GTTCAAGTGCAGCCAGTATATGTGGCATTTCAGGGAGGAGGAGCGAAAGGTGCGAT  
TCACATTGGGGCCCTTAGAGCACTTGAATCTAATATAGTAGCTGAAAACCTCTTTGGG  
CAAAACCTTAAAGCCAAAATAGTTGGCGTGGCAGGCACTTCAGCTGGATCGATTAT  
GGCTGCGCTCGTAGCATGCAAATATGAAGCTAATGAATTGTTTAAAGAATGATTCTGA  
GCTTGTTTTTCTCGAAAAAATGATGGGGGGTGGGAAGGGTTCGTTGACCAGTATGTT  
TACCTGGCGGGGCTGGCTAAAAATTAGTTTGGCAAGGTTTCTATCTAAATTGTCCGC  
TGTGGCCCTGTGTATTATATCGGTCCTCTGCTCGCTGGTTATACTGCTATTGGCCAGT  
CCTCAAATTGTTTCGAGTAGCTATGGGGCGATCTACGATACGGCTCTCCTGACTTCG  
TCTTATGTGGCCGTAGCTTGTATATTCTTTGTTTGGATTGCTATTTATTTCTTTAGGCC  
GGGTCTGGCTCCTCTCAAAGAAGTTTCGAAGTGCCATAAATAGAGCTTTGTGCGGAAG

TGATATTTTTAAAGGTAAACCTCCCTCTGATGTTACGTTTAGGCAGCTTGAGGTGGC  
CGGTGGTAGGCCCCCTAAAATAGTCTCAACCAATCTCACCCTAAAGGCATACAGGT  
TTTTTCCGCGAGATCAACTCCTGACGTCTCAATTGCAGATGCGGTTTGCGCATCAATT  
TGTCTGCCTTACATAATTTAAGCCGTATGAGGTTGCTCTTGATCATGATAGGAAGTGC  
AAATTCGTGGATGGAGGCCTGCTTTCCAATTTGCCGCTATGGGTATTCGACGAGGAG  
CGGCGGGTAGATGATTCGGGGAGCTGGACCATTGGATTTTCGATCGTGGGTGAGAC  
GTCAGAGAAATCTCATTGGCTGGGTGCCATTCTCGATGCTGTCGTTGCTGGGCCCC  
GGAGATCCACGCTCGTGGAATAGATAATCTTATGGTTGTTCCATTAAGTACTTCACT  
GGGAATGCTCGATTTTGGTGCTCCTCTAAAGGACTTTAAGAAAGAAATCGATTGTGT  
TGAAAAGGTTGCTAGCAATATCATAGTTTCTCGCCTTGATGAGTGGCATGTGGAAGG  
AGTTCTTGCGCGTCTTGGGGATTCTCTTGTCGATTTCGTTCAAGCGTGAGCTGAAGAG  
ATGTGGGATAGGCAAGAAGATAAGTTTGAAGTTGGCAATTGCGTGTCCGGGTAATA  
ATGGTAATGGAGGCATGGTCACTCGTTTCCGTAGCGGATATCAGTTTTACGATATTC  
GCGAACGAGCGGTAGGGAATGACTCAAGTCCTATCATCGATTTTCAGCTTGAAGCGC  
AAGAAGAACGATATAAGGCTGAGCAGCAGTATCTGGATTGTTGCCTTGCCTCTTAA  
ACGACGGCGGGCAGGGTGGTGCCCTCAGTGATCCTGATAGAGTCACCAGACTTGAC  
ATCTAGCGATGTTTGCCGTATATATGATTGTGAGTTGAAAGAGGCCTTTGGTCAGTT  
GGCGAAACGTTGTCTGATGCAGTGGATCAAATGGATTTTGAAGCGGAAGTCGGCT  
CGATTGTTTTTCCGGAGACGAATAATGGAACGTAATAATCGCTAACGAAATATTTCGAC  
GTGACGATGGTTGATGAAAACGGCAATCGAACGAAGCGAAGTGTTTCGCAAAAAA  
GGCAGGTTTTACCGTAACTATTAAGCCAGCGAGTGCATCTGAGAAGAGGCTTGGGA  
TGGCCACCCGAGCCATTCATAAGCAGAGGCGGGGTCTGAAGGCGATTCTTGGTGAG  
GGCGTCTTCTCAATCCGGACGCTAAGCGCGCCAAGCCGCTGACCTGAGTCGCTGAC  
GCGAACAAGATGCTTTCAGTTTGTTGTAAGTTCTCAAGCTTGGGAATCCTTGTCCAG  
CATATCTATGAACCAGCAGGGCTGCGCTATGCGGCCCTTGCTGCGCTTAAGGTGCTA  
GGTTACTGAGTCAGCTTCTGCCACCGGGGGGCGTATCCCTAGCCTGAGCCACACCAG  
CTTTGATCGGGTAGAGGCGTCCTACCTTCCGTGTTCTCGCCGGGCCATAAGCGGCC  
AGACAAGGAGCCCGAAAGGTCCTAGGAAGAGCAGAGACAGCGAATGCCGCCGGGA  
AAACCGGCTCCTGACAATCATCAACTTCCGGGGTTCGGCTGGTCAACGAGGGGAAG  
GGGCGCGCTCATTTGGCGTAGGCCCTGTGACCAATGCTTTCTGGGTTTGCGTAGGAA  
GGCGGGCCGCCACAAGCACAGAGTATCTCCGGAGTGCTGAAGCCAGCTACGGCAAA  
CCGTGGCGTTTCGACCCTCACGCTCTTGCGAAGATAAGGGCCCCAAGCTCAAGCCTCC  
CTACGCCTCCCTGCCAGGTGCCTATATAGCACGGGGTTCGCTCGAAAATGGGCCTAA  
TGCGGTCTGAAGGATGCGGCTAAACCTCGGTGTCTGGCGGCAGCAGTCGCCGAACGC  
ACTCAGCCCGAGCCTTAGGCTCCATCTTGGAAGCGACACCAACACCCCCGCCAGCT  
GGTCTGCTGACGCGGAGGCTGCTGCCCCAGCGCCAAAACAGCGTCGGCCATGCTC  
GCGGTGCTGGCCAACAAGTAGGCCGGAGGGACTTCAAGGGCCTTAGCCAGCTCGAA  
CAAGGCCTCCAACGAAATCGACATGGCTCCCGACTCGTATCTGGAGAGCCTCGCCG  
AAGCTGTGTATTTGTCCAGGCTCATACGCATCCCTACCTCGCGCTGACTCAAGCCCC  
GCAGCTCGCGGGCTTGGAGCAGGCGCGCGGCGACCACATCGCGGGGAGCGATCGGG

GCGGGCTTCACAGGCTGAACAAATGCAGTGCAGGCATGCCCAGAGCATGACGGAAC  
CGCTACGCCCCGGGTAGACTCTACGTGACACGTAAC TTTGTCGCAACCCAAAGGAG  
AGGGGCATGAAGAAGCAGTGGGCAGCGGCCACAGGCGCGTGCGTCTTGGCAGCAA  
GCATGGCGGTGCAAGCGCAGGACAGGGGAAATCTTCTTCAGCAGATTGGGCGGGCC  
ATCACCGGGGCTCCGCAGGCATCGACGGACAGGGCCAAGAGCCCGTATCTCGATCC  
GCAAGGAGCCTACTGGGACCTCGACCAGGACGAACTGGCAGGCGCGCAACACATCC  
GCGCTGGGTTGGCGTCCACGGCCTCGGCGGGCTACCACACCTGCGATGCGAGGCTG  
ATTGCGTCGACGCGGTCCAGCTACCGCTTGAGCAAGACCGAGCGCGAGCAGTGTTT  
GTATGGCGAGTGGCTGATCGATACGAAGCGGAACGGGCCTAATGGCATCACCGCTC  
AGGAGCCGGAAGCCATTGAGCGCAAGTATGGCGCGGCCTTTGATGCGCGGGCCGAG  
CGCTTCCGGGGCATCGACCGGTTCCGCCGTTCCGCCCCATTTGGTCGACCAGCCGGCA  
TACGACCCTAAGCGTGGCGTCCTGGACATTCATGTGCCGATTCTTGATCACCGGA  
TTCCAGGTAGAGGGCATCACGGGCGAGGGGTTTGTCCCGACCAGTGCTCGCAGTGA  
GCGATCCGTTTGGACACCCAGCATGCCGGGCACTTTTCATCTTCCGATCCGCATGAG  
CGAGAGCGAAGCCACCGGATTGTTTAAGCAGGGCAGGGACGCCAGGGACGATCTGG  
TGGTCTTCACCGTCAAGCGGGTCTGGTTGGAGAACGGAGGCCCGCGCGCCGAGGTG  
GATGTTGAACGCGTCCAGGTGGGTTACCGAAACGAGGTCATCGGCGTGACCTGAC  
CAAACAGAAGAAGGGAGAGTCGTGATGCGGACCATTC AACGTGTTTGGATTTCGGC  
GTGCTTCTTGGCGTTGGGCTTGTGCGCCTGTGGTGCAAAGCATGCGCCGAGCAAGGA  
GGACGCTGTCAAAGCAGTAGAGCGATTCTTTACTGAGCAGGGGAGGCAGGCAACGC  
TTCAGCGGACTTGGCGGTTCTGAAGTCAAGGAAGCGAGCGGGCTGGAGATCGCCTGC  
ACAAAAC TGCCAACGGTGATCAGGACTGTCGGATCTCCGGGAGTGTCGATGGACT  
GGGCTTCATTGGCGATCAGCCTACGACGCCGAAGGCCAAGGAAATGCGCCTAAAGA  
TGACGATGAAGTTCCGGCCGGCGGGCGAAGGTTGGGAACTGGTCGACGTGACCGAC  
AACGGAACATCTGCGGGCTGACCCTCGACCAACCACTTGCCATGCGGTTGCCGTGAC  
GCCGTTTGGTCTTGCTCCTAACAGAGAAAAAGAAATGAATCACCAAGCGAACTACC  
AGCGGCTTTATGCGCCGACCGGGCCGGCTGCCATGATCCTGCCCTGCGTTATTCTCG  
GGCCTTTGGGCATGCTGTTGTTTGGAGCAGGCCTCGACGCTGTTTTCAAACCCAAC  
AGCTGATGGGCTTGGTCTACTGCGCAGGTGGGCTGCTGATCGCCGGCTTCCTGGTGT  
TCTGCCTGATGCTGCACATCCGCGCCCAGCAGGTCTGGGCTTGGCATGTCAGGACCG  
GCCGCATTCCCTATTTTCGCAAAGGCGGATTCCTGAAGGGGGCGCTCGTGGGCGGGC  
GGGTGGGGCTTG CAGCCGTCTTCGGTTGCGCCGTGCTTGGCTGGAAGTTCGCGGAAC  
ACCCGGTCTACGGTGAGCTCGCTACTGCTGCTTTCTACCTCGCGTTCTTGTGGGGCAG  
CGTGATCGTGGTAGCTCCGGCGCTCATCGTTGGCTGGGCGAGGCGGGCGTGGGATC  
GAACGGCTATCTCCAGCAGCTAGCGAACGTGTCTGGCCGTTTCGCGGAAGCTGATCG  
CAGCACGTTCTACGGGGTAATCGGCATCAATGGCAACACCGACTACCCGTTTACG  
AGGCAAAGCTGAGCGGCGAAGCGGTCTGGCTCACCTGCCACTTAGGCAAGGATCTC  
ATCTAAGAGGGCTTCTGACTGTCGTTTGCAGCGAAAAACGCACCCACCAAGCCGTC  
GCACGGTCTTATTGCCTGAGTCTGGAAGGGTCTCTAGGAGCCCTTCCACCTCCGAC  
AGTCTGGGATGCCCAATGGCGGCCATGCCTTTGACAAAGTCGATATCCTTGTCACGG

CCAGCACACAGCTTGGAGACCAGTAGGTCCTCATACGACAGCGCCATGAATGTATC  
CTGCGCGACATCGCCTGATTGGTATGGGATGAGCCTATCGCGCCAACCGGGAGCTA  
GGATCGCAGTGGCTACTTCCACGCCATCTGCGTGGTAGCCATAAGTCCGGTCAAAGA  
TCGAGGCGTCGCCAAAGTTCTTGTCGATGATGTCCGCAACGGCTTCTGACTGTTGTT  
GCGGTTTCATCCAACAGAGCGATGTCGATCTCCCTGGAGAAGAACAAGACATCGGAC  
GGAAAGTAGTTCGGATCGATATGAGCCAAAATGGCTTGGCTGCCGATCAGTAAGAA  
TCGGTGCTCATGCCCCGGTTGCCTCATCGACTGCGCGCAGGACATGGTCAAGCTGCTC  
TGGCTTCATTGTGCCTCAGCGCTCGAACTTCCCCTTGACCTGGTCAAACAAGCGAT  
TCCGCTCTTGCTCGGAAATCAAGGCGAGGAAGGGGGCAGGGGAGCACGAACGCAA  
CACCTGGCCCTCATTGTCGTCTGGAGAGGTGAGCACCCCCACGACCGCCGCTGTGCC  
TTGCTCAATGAGTTCTTGCCAGCGATGCAAGTATTTGGGCGAGCAGGCATGTTTCGCC  
TGTCTCAAGGGCACTCACCAGATACGTCCTGGCGGTAGCCAAGACTTCCGGGTGGTG  
AGACAAGCGCCGGCCTACCTCGCGCCAAAGCACTCGAGATTGAAACCAAGACACCG  
GTGGGAGCCAGGCGCCAGTGGAGCAGTCGGCAGGGGTCAGAAGGGAGGCCATATC  
CATACGATAAGCCAACTGCCTTGGCGGTCAAGTCGGGCCGGTGGGAAGTCGCATCC  
ACCCCCGAGACTGTCGGGCTGATCGCCCCCGAGACGCCATGCCGTTCCGCCATTCCG  
AACCTGGCTCTGCTCAAGGGACACCGGAGGGGGCCCTTTGCTTCCGTGGGCCGAGCG  
GCAGCAGCCTCAAGAGACTGCTTGATTTCCGCTATTGTCTCGTGGACTGTGATTCCG  
CCAGTGAGAACCTTAATCGACTCACTCATCGATATGATGGGTGAGTAGCTGGGTCCA  
CTTGCAACCTCGACAATCAGAGAGTGCGGGGCAGTCGCCTCCACAAACGCTTTCGCT  
CCATCCATTCCATCTATTCTTCCAAGTTTCTCCATCCTCGTGCTTCAACCCCGATAG  
GCGTTCGCAAGCCGCGCTCAAAAAGGGAAAGGAGGGTGGCGAGCGATCTGTGCGTA  
TAGGTTTCGCCCTTCAAACCTCTCTCCATTTATTTCGAATCTCATTCGCTGTGAAGAGGC  
CTCCGGAACGCCCCGTGGAAGATTGCTCAGTAATCTTCTGTTTCTCATCAAAATCAC  
AAACCGCTTGGCACGTCTCGGCCATGTCTGCCAACGAGACATGGCTCATGAGGCCA  
GTCCTGTAGATCAAGAAATGAACCCAGCTTGCGCCTGCAATGAACTCTGAGGGGGA  
CGCATTGCCGTAGTTTCCGCTGTGACGCAGCATGCGGATTAGTTGAGGCTCGGGCCG  
AAAATCATTCCGGGCAGGCGAGATTTGAATGAGGCTAAATCCGCCACGTTTGTGGA  
CTCACGCTTGGCTTGAAATGTCGCTACTCTAAAATGATCAGGGGATAGTCTCAGGAT  
CAGTGAGAAGTCAGCTCCCGTCCATGTTTCGGAAGACAAATCGTCGCCGCTCTTTGA  
ATACAAGGTCCAGTGGCATCTGTCTGCGACATCAGGACCGGCGAGTTCGCTGGCCC  
AACGAATATTGCTAGAGATTGCCCCTATCAGGGCTCCTGTGGTGGCCTCTTCTAACA  
CCCGGCCACACAGCCCGCCTCCGATAACAGAAGAAATAGAGAGGTTGAGTGCGAGT  
TCAACAGCCAGCAGAGGAGGCCATGCAGCGTGCTCGCCAGCCTTCTCCGGATGCTC  
GTTCGACATCTCTGGTTTCCAGTTCCCTTTGGATGGGCAAGAATACCTCACTGGCAC  
CTGGCACGGTTGGCGCAGCCTTCAGAACAGCTGCGCGCAGCCAGCTGTATGCAGCG  
CACCCGTATCGATTGCGGGCTCCCTCTAACCTCGCTGTCCAGTCGCGTGGCAACGGG  
CCGGGAGACTCCCCCAGGCACGCGAGCACCGGCCTGGGCAAAGGGGCAAAATCCTC  
ACGCGACCAACGCAAGAGTTGTCGCCGACCTTCGGCGCTAAGAAGCGGATCATTC  
AAAGCTCTACGGCAGTATTTCAGCTCCCATAGCCGACGGGCACCCACAGTCCGCCAT

GTGGCACGCACTTCCTCCAAGCTTCGGAAGTGATAAGTGGGATATGGATAGCCATCC  
GCCGGTGCCGTGGTCCATCTTCGCCTCATACCATGCCGCTCAGACTTCTCATAGGTC  
AGGGATATTCCTAGTCTCGCTAGGTGCGTTGTTAGTTTTTGTGATTCATGATATCGG  
CCTCAGTAGACACTAAGCGGCCGTATCTATATGTCAACCTTCGGGCGAATCCCTGCC  
AGGATGCGAGTCGGATGCGCCCCTGGCGGCGGTCAAGAGGCTTTCGCGCGGCTTC  
AAGAACGCTGGTCAGGTGCGCCGCTTGTCTCGCTCCCGGATGTTCTTCACATACTTG  
GCATCCTTGCGGGAAGATTCAGCAGCACGTTGCCAGGGTTGCGATC  
GATTCATCGGACAAGCGGAACGACGCTGGAAGCCCGCCCAGGCCGCAGTGTTGATT  
CTCCGCGATGCCTTCTTCAATGGCTCGAACGAAGTCAGCCACGGACGGGCGCGAGG  
TCTGGGACATCGCTGCGGAGCGGCTGTCATGGGATTGCACGTTGGCTTTCTCTGCAT  
CGTTCCCAATGACCCGAACCATTTCCGAGAGGCTTGGCCAATACTTCAGGTCGAACT  
GACAGAGATTTTCCAATTTTTCTTTAAGGTAAGACTTGTAATGCCCGTTGCGTTCGCT  
GGCCCGGTCGATGACTTCGACAGGGTGATACAAGGTGTCACTACTGAACGGTCCTCG  
GTTGTTTATTTGTTCCCTTTCTTCCAGCAGTTTCGCAAGCTGATCCGCTACGCCAGCA  
ATGGCCTCATTGACTTTGTCCAAGCGTTTGCGAGCTGAACGATCGGCAATGTTCTTCT  
CGGGCGTCCAATGCGCTCCAGTAGCTAGCACGCAGAACTCAAAAAAGACCTTCCAC  
TCAATGCCGTCAAAACCCAGGGACTGCTCGAGTTCCTGGTAGATCGAACGAAGTTCC  
AGTCCGCGGTTGAGCATGGTCCGAGCCACCTTGCTCTCGGAAGGAACTATGCCTTTG  
GCCTCGTTTCGGCGGATCTGCTCCTGTAGGAACTCTTCACATATCAGTTGGGCGTTA  
ATCGAAGGCACTGCGGTGCTTCCTGGCTTCAAGTGGCTCCCACGATAGGGGGCGTGT  
TGAGACCCGTCGACATCTGAAACACGCTTTCGATCTCGCTTTCAGATCCCGGCTCC  
AGCGGCTGCCCCGCTGGGGAGGGGCTGGTCGCCCAGCCGCCAGCCGGCCCCGGGCGG  
AACGCTCGCCATACCGATCCACCCCGGTCATGAGCTGGCTGCTGTCTAGTGCCCGTT  
GGTTCAGAGGAACCACTCTATCGCCAGGCACGAGGAGTCATTAGACGAGTTTCGGC  
CACTTTGTTGCGTAACTCACTCGACGGTCGATCGGAGCTGTCTTCAAAGAGCTTGAA  
GGTCCACGTCATGCCACTGGCCCATCTCCCTTTCCACGTTGTCCCAAATGGCTTGAA  
GCGAAGCGGGGTCGCCGGTGTAGAGCGCCTGATCGATGTGGACGAACTGATCAAAC  
TGAGGGTGGGGGAGAATGCTTCCGACCCCGCTGTAACAGAACCAGTCTCCAGCCAG  
CTGCGCGATCTGGGCAAGCTCTTTCAGAGAGTCGTGCGCATCCGTTAGGTTCCATTG  
CTGAAGCTGTCTTCCAGTCCTGCTGAACTCGGTTCCGGCATGAGCGATTTGAACGTG  
GACATGGTGAACCACTCCGTCTAATCGAGCGAGCCTCTGGTGAAGCCCATCAAAAA  
TTTCCGGCTTGATCAGATCGTCCGGAGTTCGGTTCTCTGGGAGCACGCCACTCAGTT  
GGTCGAACAGGACATGCCGTTGCCGGGAGGGATCGCTGTCTAGTTCGCGTGGGATG  
TTCATGTAACCCCGCTTCCGCTGCGCAAAAACGTATGCCCAGTGGCGTTCTTCGATG  
GCTTCGAAATCGTAGTCCAAGCCGGCGATGTCTTGCAAAACACCCTGCGGGTGATT  
CCGGGGCGGGCGGCCCTAGCGTCCTGAAGAAGTCCACCGAGTGAGCAAACGGCTTT  
CGGACCTCGGATTGGGCCGGGTTTCGGCCAGCCGTCTGACCCCTTGATCATGTTGTT  
CCAGAAACCGGTTACCAGCATTTCAGGACCATGCCATTGAGCCGCTTGCCTTCGCC  
TTCGTCCGGGGCCCGACGGACCATCTCGACGATGCATGTGAAGGCAGCCAGGTCCC  
ATGCCAGCTTGGAAGGGCCCTTGGTGATTGCATTGTCGTCCGTGTCGTAGATCGACT

TCCATTCTTCGATTCGCTGGCGCATATGGGCAGAGTGGCAGTAGTGTTGGGACCATA  
ATGCCGACTGGGCTCCTAAGTAGCATCCATCAAGGGTAAAGCTACGCATCCTTACCC  
AACTGCCTTTTGAAGTGGCCTCTCTGATGCTTTGGGGTGGTTCCTGTTAGAAAA  
ACCCACGGTAGGCGTGACGCCGTGTCGACTCCCCGCAATTCAATGCCAACTAAAGT  
AGAGGTCTGCGGTTGATGTTGCTCACGGAAGTTCGGCGGGTGTAGCCCCGCCAGGCT  
GTCGTGCGGTATCTGTTGGTTGTAGTCGGCCAGCCACTGTTTCGGTCTGTTACGGAC  
CTCGC

>CONTIG\_26\_length\_11408\_cov\_90.797004

CCTTTACTTGCCAGCCAATACTGCCTTGTTTCATACCAGAACACATAGCTGCCCCAAA  
CTACGGCACGTTTCCCGCGCGCTAGCGCATCTGCCAAGAGCTGCTGCACACCACGCA  
TCGTGAGGATGCGACTGGCCTCCGGGAGCAACATCTGCCTGATCGCCGCCTTCATCT  
TTCCGTAGTGATCGAACTCGTTCAGGCCGAACCCGTTTGCAATCGGGGCTCGGTGAG  
CACCTCTGAGGCCCTTGCGATTAGCGAGAAAAGACTTGCACCAAGAGCCATCATCA  
CGCCGTTGAGCCATGCGTCTGCGCCGCCCATCGCCAAATGCAATTGAGCGAATATAA  
GGGTGCTGAGTGAGTGCCGCTTCGATTTCTATACGGTAGGTTTCGTCATCCGGATAC  
AGTCGAGCGGGCAGCATGGCGACAGGGATTTCGGACAACCCACGGGCTCGCCCAAT  
TGCCAGCATCAATTCTTCTTCTTGCTGCAAGCGTTGGTGCGACTGGCGAGCTTTCTGA  
GCTCGAAGTTGAAGAGAGATGCGGCGCTCCGCGTCGGGCTCACTGGCGAGTTCCTG  
ATCGAAGAAGTTGTAAATTTTCATGTTTCGCGCACCTGCGCCTGCTCCCGTGTGGGAAA  
AGCTCTGGCAGGAATATCGGGTGTGTCGTTTCGGGTGGTGTGCGCCGCAAGATGGAA  
GCGATCCACCTCTCGCGACAAGGACTTGGACGAACCAAAGGTTGTAGTCGGGATCG  
AACTCGGTTTCGAGCACTGATAAATTGGGTAGTCATATAAAAAACAACGCCTCGTCT  
ATGAGTTGAGACGCCGCAGACACGAGCGTCAACGTCGTCGCTATCTTTCCCTTCGTG  
TAGCAACACGCGTGGCCCCGTCTATTTGCGGGGCCATGGCAGTTGCCAGTTAGGG  
GCGGTAATCGCTCATCGTCATCGTCCTTCTCAAAGGACTGCTCAGTTGATCTACCTA  
AGTGCTCGAATGTTAGAAGCGACAAAGTTTGCTTCCACGCCATCATGTGGAGTGCTT  
CTTCATAGCAGGTGAAGTTGTCTGCCGATGCGCTGTTGCTCCAATCTGACGCATCGA  
GATCTTCGGTATCGAAGCGAACTCCGTTGCGAAGCAGCCGGGATGCTGCGGAGCCG  
CTTGGAAGTTTGATCCCTCGTTCGATGTAGATTCCGGCCTCGCGCACAGCAGCAGAT  
GGCAGTGCCAGCTGGATGCTGCCATCTTCGGCATAAACATAGGCGACAAGCTCGCG  
GGAGGCGCGCACAAAGCTCGATGCGACACATCGATGCGACGCCTGGAAGTGTTCGA  
TGAGCGTTTGAACGGTTTCAACCGTGAAGGGGAGGCTAGACGCCAGCGGTCGGATC  
AGATGCAGAGGCACCAAACATGCTGCCGCGAAGGCATCACAGAGCTTCTCTTCTGA  
CGGACGACCTGTGAAGCGTTCGAGCTCGTTGGAGGGAAGCACCTCGCCATGCTTGG  
AAGGAAGGTCCAGGACGTGATGGGCAACTTCGTGCAGCGTGGTGAACCGTTGACGA  
TAAGGATCGTCGTTTTGGTTGATGCAGATGATCTTTCGACCAGCTTTCGGAAACGTG  
TTGCCAGCCTGATTGGCAGGGAGGTCTGCAAAGTTCGACCTCGAAGCCCAGTCCCTGG  
GCGATGCCAACTGCGTCAACGGGTGCCGACGCAATGTCCTTGACTAGGGCTTGGGCT  
CTGCCTACTTGACAGTCAGCTCGTCCATGAGGCGATCTCCTACATCGAACGCACAAGC

TCGATGATCTTCATCCAGTCATCTTGGGTGGTAGGGCGAGTGCCGCGAAAGCTCATA  
GTGGCCGCGCGGCTCGATGTCTTCAATCGGGATCTCGGGATGCCGGTTGATCAGCTCG  
AACAGCACATCATCGATGGGGGTCTTGGACAGGAGAGCCAATATCTCGGTGTCTCTC  
GAGCTGAGCTGTAAGGCCTTCGCCATCTTGGCCACCGTGTCTCAGAAGGAGCCGTG  
CGATGCCCACTGGCAAGACGCCATAGGTAGACGTGGTCCAAGTCCTCCACGCGCTC  
ACTGAGCTGGCGAAAGCTCGCGCTCTCCCTTTTCGAAGACACAAAACCCTTTAAATC  
CATGCACTTAATCTCTTACTTGTACAGTCCGTGCGCGTAGTATAGGCTTGTTGCCTAA  
GCCAGAAACACCGTAGATCAGATCAGGCCGTGAACGCGGTCATATTTTGGACATCG  
GTGTTGCCTGGCGAGGCAGCGCCCGCCTCGGCGGGCTTTTTTTAGAACCAGGCTGTT  
GCCTGGAATGGAAACGAGGTGACGCACGATGAGTAAGACCAGCGGTTTGAAGCCCG  
GGCAGACGGCTCCTCGGTCCGGCCAGTATCAGATTACCGGTCCGCGCGGTGGTCAG  
GGTCCGGAGCGGACGGTTGTAAGGGGCGAGCCCCTCCCGCCTACCCCAAGTCCTCG  
GTCTACCTACACCTTGGTCGATCCGACCAAGTCGAAGTAGTCGCCAGTCGCGACCGG  
TGCGACGGCCATCACATTCAATCCGGTCGCAACTCTTCCGCTCGCCGCTCTGTCCTCT  
GAGGAGATCTTGATGAAGCCCTTTCGGGTGCTCTGCCTAGACGGCGGAGGAATGCG  
AGGCGTGTATCAGGCCGCTTACCTGCGGGCCTTTGCTGCTCGCGTGTGTGGTGAAGG  
CGATACCGAGCTGGACGTAGGACGGTGCTTTGATTTGATTGTCGGCACCAGCACCGG  
CGGTATCGTTGCTTCCGCGTTGGCGGCGGGGGAACCCCTTTCCAAGGTGGACCGGT  
CTATGAGGAACACGGCAAGGAAATTTTTCCGGGTCAGTGGATCCGCCGTGTTCCGTG  
GGTGGGGTTGGTCGTTCCGCTCCTCGGTCTCGGCACGCGGCGCGGAGAGACTGCGCT  
CAGGAGTGCTCTTGAAGCGACCTTCCAGGACAAGACCTTTTCGCTATGTCCAAGAGGT  
CCGAGGCATCAGCCTGGCGTTGACGTCGATCGATATGGCACGCCACGCGGCGGTCG  
TGTTCAAAACGCGCCATCTGCGTCGGCTCAATGGGCGCGACGACAACCGCACACTG  
GTGGATGCCTGCATGGCCACTACTGCGGCTCCAATCCTGCGCGCTTTGGCGCGCCTC  
ACCGAGCCGGGCGGTGAAGCCCACGTGGTTTATGCCGACGGCGGTTTGTGGGCGAA  
CAATCCCGGCGCGCTCGGCGCGATCGAAGCGGTGAAATCCTAGGAGATCGGGAAG  
AGGCGCGACCGATCCACCTTTTCATGTTGGGCGCACTTCCGGCACAGGGTGGAGAG  
GAGCTCTCAGATCGACGCCGGTATCGTGGTGCCTTGGGATGGAAAGGCGGCTTGCAT  
GCGATCAGCGCGAGCCTCAACTCGCAGGCGGTTCGGCTACGACTATCTGAGCAAGAA  
GATCCTGGAATTGCGAAAGGACGAAAGCATGGCGTTCCGCTTGCTGCTCAGTGTCC  
ATCCGAGCAACTCCTGAAATACATCCAGAACATGGATGACGCCAGGCCGAAGGTGC  
TCAATGCCCTTCGCCGTGAGGCGACTTCCGATGTCGACTACGCATGGGCTCAGTCGG  
TCAAGCCCGGAAGCGAGATGGCGCACTTTCGCGCAGCACTGACCGATGGCCTTTGT  
AAGCAGAAAGGAGAAGGGTAATGGCTGTTTTTATTGTTGGCGAGGACATGGAAAAA  
TTCCATGACAACAAGATTAACCTGAGCACAGACGAGCGCACCGAGATGCGTGAGCG  
ACGCAATACCGGTCGTCGTCGCTTGGAGATCGGACTGGATGAAGAGGAACATCCGC  
AGCCGAAGATCACTTGCACTCAGGGATCCTACGCGATGCATACGATGGTCCAGGAT  
CCGGAATGCGACTATGACATCGACGACGGCATCTACTTCGCCGAAGACGATCTCGTC  
GACGAACTGGGCTTGTCGCTTACACCGCAAAAGGCAAAGGAACGTGTCTGCGCAGC  
GCTCTCGCGCGATGACCGCTTCGCTAACCCGGCGGAGGTGTTCCCAAGTGTGTGCG

GCAGGTCTACAACGAGGGTTATCACATTGACATGCCGGTCTATCGCATCCGAAAGG  
AAGATGATGGCCAAGGCGGCAAGCGGGAGGTCTTCGAACTGGCGGGTGATGGCAGT  
TGGGACGCATCCGACGCGCGCGGACCACACGTTGGTTCCGGAAGGAGGTCTCGAC  
ACGGAACGACACGAACGACGACGAAGGGGAGCAGATGCGACGCATCACGCGTCTG  
ACCAAGGGGCAGGCACGCAGTCGTGAAAACTGGAAGGATGAGACGACCAGCGGGA  
TCGTGATTACCAGGCTTGTAGTGGATAACTTCGTGCCGTTGGCTGGTCGCGACGATG  
AGGCCTTATTGGAAACATGGAAAAAATCCAAGCGCAGCTGAGCGAATCGACTGAA  
GTTGAGCATCCGGTTAATGCTTCCAACCTTGGCTGAGTCAGGCAACGCAAAAAGTCGGC  
TTCTTCCGCGACAACTCGGCGAGGCGCTCGAAGAACTTGCGATCCTGGAAAAGGG  
TTGCACGCGGTCTGAGGCGCGCAAGGCGTGGGATGGCGTGTTTCGACAGTGGCTACTT  
CCAGAAGCTCTCCGATCCGACCGCCAAAGAGGACGCGAAAAAGGCTTTCTTTATCG  
CCACGTCTGACAAGTCTGACGTTTCGAATGATGGCAACGGCCGCTTTGGCTGAGGAC  
GGACCGTTTGGACTTCACGGTAAACCAGGTAAAGGAGATCGAGCACGGTCTGGATC  
AGTCCAGACCCGGCTCCTGGCGACGCTTGCGTCCGGAAGAGGAAAGCGCATTACCC  
GGCTTTGGGCTGGTAGCAGCATGGCGGGTAGACATCCCCGCGAATTGGCACCGCCA  
TCCCTTGATTGACCACGTTGTGGTTCGGTATCAACGCGGCATTTCCCTTTTCAGACCCG  
GTTGTCGTCGCGCTGCAAGGTGTTGCCAAGGATGCGCCACATTGGCCACACATCGAC  
CCGAAAGGAAATGTCTGTCTTGGTAGGCTCCGCTACTCCTCGCCTGCGGCAACGCGC  
ATTCTGAGCACTTTGCAAGATGCTCTGACAGTCTTAGAGATGGCGGAAGAAGAACG  
CGACGCTGAGCATCGGCGTGAGTTCCTATCCTATTGGGCGCAGCTGGGGCAGCCCAC  
ACGCACACCCTACCTGAGCCTGATGGGTGGGGCGAAAAATTCCAGGGATATCGCCT  
ATTACAACGACCCTCGCTGTGGGGTCTTCTTTGCCGAAGATGCGACGCAGCTCAATA  
CATGGCTGGCGCGCATCGGAAAGCAGCCGCCGAAAGTTGCGTCTACTACCCATCTC  
ATTTGGCTGGATCGGCCGCTCCTACCGGATCAATTTCCCAAGACTGGCAGAGAAGTT  
ATTGCGTTGGCCGGAGCGCGCGCACTTGAACCACATGTGCGACCCGGGAGTGTGCTT  
CCTGTGCTGCTTGGCTGTGAGATCGACGGCAACCCGGTGTATGTCTGTGCGGAAATC  
GAAGGCATCAGCGTCAAAGCTGCGGCAAAGGGGTTCAGGCCATCTAAGCCGCGACC  
GCCCCGCCCTCGTCGCTGCGAGTTTCCATACGAGACCCGCAGTGCGTAGAAGCGTTCA  
GCGCGCTGACTACGCGTGGGTGCATGGACGCGGCAAGAATGCCGATATCGAGGTGC  
TGCGCGGCAAACGTGTCGCCATTGTGGGTGTGGTGCTCTCGGCGGCTTTCTGGCAA  
GGGCGCTTGCCCAAGCGGGTGTGGCTCTCTGCTTTTGATCGATTCCGATGAGCTTGT  
TCCGAGCAATGTCGGGCGACACGTGCTGGGCATGGAGGCCGTAGGCCAAGACAAAT  
CGCCAGCTCTGGCAAAAAAGCTTGGTGCGGATTTTCCTCACGCGGTGGAATTTCGACG  
CATGGAAGGGCGCGATCCAGAACGCCAGTGCGGAGCAGAAGATGGAGCTCGCCGCT  
TGCGATCTAGTGGTGGCCGCCGGCATCAACCTCGCTGGCGAGTTGGCCCTCAACCAC  
TGGCGGCAGGAACTGGAAACCCACCGCCGCTCATTTGGACTTGGATCGAGGAGTTT  
GCGGCTGCAGGGCACGCGGTTGCCCTTGTTCGATGGCGCCGATTTGGCTAGCTCTCTC  
AACGCTGATGGAGAATTCCAAATGCGGCTTACTTCCGATTGGCCGGCGGGGCAGGG  
CCACGCGCTAGAAGCCGGTGTGGTGTTCATATCAGCCTTATAGCGCGGCCGACAT  
GATGGGCACGATCAATTGCGCGCATCGTCTTTGCCTTAATGTCCTGCTCGGGAAGCA

GCGGGGCAGTATCGTTCGGTCTTGGCTGGGTGATCGGGATATCGCCGTTGCAAGTGG  
GTGCACGATTGATGGCGCGTTTGAACGCTCATTCTGTGAGATTTACGTGCTTGGGG  
TTGATAGGTGATCATCGTCGCAACATTGCCAGAAAGCTCGCAGCGCATCTTGATTGA  
GGAGGGGGTGCTCGGCCATATGGCGCGGCATCGGCAACTATCCTGGTATTCAAGAG  
AGGCGGGTGGCCAACTTTTCGGATCAATCAATGCAAGTGAGGTCGTGGTTTCGGCTG  
CGGCAGGGCCGTATCGGGGAGATCAACGATGGCGGTCTAGCTATCGCTCCAACGCC  
GACGCTGCTCAACGTGCGATCAACCAGCATGCCAAGAAGGGGCTTCTCTACCTAGG  
GGAGTGGCACACACACCCGGAAGAGCATCCGAAGGCGTCACCGGCTGATCGGGACG  
CGATGGCATGCTTGCTTCGTGCGTCGCAGGCTCGTTTGAACAACCTTACTCATGGTGA  
TCCAAGGCCGCGCAGATGGACTCGGAGGTTTAGCTCTTTATTCATTTGGTTCAGATG  
GGCTTGTCGATGGAATTTATTTGTTGATGATAATCTATTGACAATCGCGAATTAAG  
GAATAAATTGCGCTCTCAATAGGGGGTGAAAATGATTTATCCAGGCGATTTCTGTTCT  
TGCGATTGAGGGCGGAAAATACCCAGTCGAAGATACCCGGGTGCTTGCTCGTATAG  
CATTGAATGCACTTCTGGATGCGGAACGATTTCTGTGCGATCTGTTGGAAGTTAGAA  
CGCTTGGCATCGACGCAAGAATAGCGGCGCGTGCTTTCTTGACGTATATGGCAAACA  
ATCCTGGGGAGTTTCAGTGCGCGGGATGCCCGAAGGTGTGAAGGTTTGATCGCTAGC  
GCGAACGCTAATGGGGAAGAGTTATGAATCTGGCGAAATATTTGGATCACATCGGC  
GAATGTGATCGCAACAGATCGTTGATGGCTCGTATCCTGTTGAACACGCTGGGGCAT  
GCCCATGCGTTTCCAGTCGATATTTTCGGAACCTTCGCTATCTCAGCCCTGAGAACAGG  
GCCATTACCAATGCATTTGAAGACTGGGCGCACTCCCAGCCTGGATTATTTTTAGCA  
GGCGCCAATCTGCCGCTGATCGAGTCTTGGGCGCGGCGAGTTAAATCCTAGGGCTGA  
TGCCTACGGCGCTTTGACGGATGTAAAATGGCCAATGCTCTGCGAACGGCATGTTTCG  
ACTGTCATCGCTGGATTGGCCAGGAATTCTTCGAACAGCACGCGCCAAGCATCCAA  
GGAGAGGTTGGGAATGGCAGCATTACCGCCATTCTAATTTAGCCCATCTTTTCCA  
GTCAAATGTAGCCGGCAGACCAATAGGGCGAGGGCTTTGAGGTGGTATGGCTGATA  
GGTCTGGCCAAGGCCGTGGAATCTCGCACAGCGTGATCCAAGCGGCTTCCCCAATC  
GCAATTTTGGACTCTGACATACGGGCAACCAGGTCGGCCAATGCGTCGCTCATATGT  
TCGGGCGCGCTATCTTTCACAAGTGCGACGATCGCCTCTTTTCGTTGCAGAGTAGCTT  
TCCCCATAATCCCTCCTCAGTTGATGTATGTGGCTAATTCGTTGTGTGAGAGAGCTTT  
AAGGCACGACGACGAGAACTGATGGGGATTCCACGCCATGAAGCTTCTCCCAAGGC  
GTGAACTCTCGTGAATAGACAGCGTGATATTTGTTATCTAGCTCATAGCCCGCGATC  
TGAGCGAGCCTATCGGAGGCTACACCTTTGCCTTGAATTTCTCGGATGACTAACCTG  
CGAAGTGAGTGGAGGCCGCGCTTCGCCAGAGGCCACCGGCCACCCATCTTGTTCAA  
GAAGTTGCCGACCGTTTTTGTGATCAAGCTCCACAGCCTTTGATGGAATTGATCCT  
CCCCTTCGGTCGCCACCCGCGCGGGAACGGCTTTCATCATCCGTGGCCTCGACTTCA  
CCAGTGCCCGCTTCTTCGCTTTCGGGCGTCAGTGACGGGATCAGCACGATCAGTTTG  
GTGTTGCGCTGCTCCCACTGGGCCACGGTCCGATCAGTATCATCGTCTTCCCATGGA  
TCACCATAGCTTCGAGTGATGTGCGCACTCATCTCCATGGGGAAGGGCATAGAAGTGT  
GCGACCTTGCTGCGCCGCCTTGCGCTAGGCTTTGAAGCAGACCTGAAATGAGCGGTG  
GCCTCGCAATAAGTGCAGTGCAGATGCGGCTTCAATGCTCGGCGAGCAGACACATC

CAGGTCCGCCACTTCCTCGGCCGTGTAGTCCTGGTCGCTTCGACGATCCCTTGCTTTA  
TCCATAGACACCCCCTGTCTTGACCTACATGCTTTCAAGGGTTGTGGCAGTAGTCAA  
GCTGTTCAAGTTGAGGAGGCCCGACCGGCCTCATGCCCTCCCGATATCCAAAAAAG  
ACAGAGGTCGCTGCGGAGCAATACGATAGAATAGTAGAGCTTGTCGATAGATCGCC  
GTGCAGCTTTACTGCAATAGATTTCTCCGAATAATTTGCTAACCAAACGATTGGAAT  
AGTCCTGAATGACAACCGCGTCTTTGAGTGCCCTTGCCGCTGCTAAAGAGAAATTGG  
CAGAAAGAAATTCGGAAGTTGGAAGAGCAGGAAGCTCAGCTACGCCAGCAGCAATCA  
TCTGAAGCCTATTCAGAGATCGTCAAGTTGCTCGACCAATACACTAATCATTTTCAGT  
GCAAAGCAGAAGTCGGAGATTGCGGCTCTGATCGGTGCTGCTGTGGCCAAGCCGAA  
GAAGGCTGCTTCCACAAGAAAGGAAGTGGCGCCCAAGTATTGGTTGCCCCACAACC  
AAGAGACATGGTCAGGGCGTGGTTCGTCGCCCTAAGGCCTTCACCATTTGGCAGGGG  
AGCGCGTCTTACAAGGAGTGGAAGCCAAGCACCCCTGATGAGAAGTTTCCTAAGTA  
TCCTGGCTAAATTTGAAGAGGCCTTGACGCGGAGGCCTCTCTCCAAGTTTGGAGTT  
TTGGGGATCACGAGACAGAGTCAACTATCCATATGGCTAAGCACTGGTCGCAGCTG  
AAAATCAATTCTTGTGAGTGGGCACGAGCAAAAATACAAGATCGGACGATCACAGA  
ATGGGAGCTAAATCACCTGCAGGGCATTGTCAATGCATGTGATGCGGCTGACCAAA  
AAAGGAAGCTCGAAAAAATTATGGCGGAGATGATTAGGGCGCGATCAGCGGAAAA  
AAATAAGGGGTAACGGGTATCATGGAGCCAACCTACGCTAATTCACCAATAGGTTC  
TAGAAACTGGCACATTGCAGCGTCGAATGACAAAAATCTCAGCGTCGCAGATCGCG  
CCATACACCGGGAGAAAGCTCTCGAAATGAGCTTAAAGCCAGCTTTTAAAGCCGCTTT  
CTAATGATGAATATTTGCGTGACAGGTTCTAAGCTTTCAGCTGTCTCTCAAAATCAG  
AACACTACGGCCACACGTCAAGCTTGATGTCTGAAATGCAGCCCAGCCGGGCGAG  
TAATGGGCTCGCGCTGCGCTGCCGTTGCCACGACGTGGCACGCGATAATCATTTGTA  
TCTGACAAGCGAACTCTAACTTAATTACTTGATGTTGGAAGCTGTGACGCAAATAGA  
AAAGCTAAGGGCTTTGATGGGAATTGAGAAGACGGCATTCAACATAGATCGGCAAT  
TAAGAAGAAATACATATCAGAGGTGCCTTGTGGATAGTAAGCAGTGATCTTCTTACA  
AACCCAGTAATGGTTAAGGCTAGGGGCATTGACTTCAGTCGGAGAATTAAAGCTCC  
CGTGATAAGTAGGAATGGGCCTCCTGACAATGCTTTAACTTGCACTTGGCAGAAAAG  
CCAAGATAGGTAAGTTTTTGTCTTTAGTGAGACAACACTGTCGGATGTCCGATTGA  
ATCTTACTTATAGTGGGTCTCTATCACAAAGCATAGGTTTCCTTCAGTCTGATTTTAA  
CTTAACTTGAATCCACTCCTGTTTAAATTATAGTAAAAAATACTAGCTCTAAATTCG  
AGTGGCTATTGATTATTCTAATCCAGTGGTTTATATTTGCAACTCTCCGGGAAATTGT  
TTCCGGGAAAGAACTAGGATTTACAATTTAGATTTAATTAAGGCTTTAAAGAAATGA  
ATTCATTTAATAGTAACGAGGCGGAAATTTACATATACACTGATGTTGCAGCGGGTT  
GGAACTTAGCTTTGTGGTTTTCAAATCGCACGCTTTTGCGAAAGAGGGCTTGGAAA  
AACACCTGCGTCCATTAGTTCTTAAAGAGGATTCATGGCAATTTGATGAGGCTCTCA  
TATCTGAGAAGGAGCGTATGCGCATCGCGTGTGATCGTATGGATAGGGGGTGGTCA  
TTTTTGGATTTCGGACCGCTGCGTCTTGGAAGAATAATTCCTTTATTCTAACGCTTTCT  
TCCGCAGCTCAGGATTTGATAGTGTGAGGTTGTGGCGCGATAACCTGAAGTGGAAC  
GATCGTATTGACTACCGGCCACCCTGAAAGCTGAAGGTAAAGCGAGTGGCGGCTGA

TTGCATCTGCTCTATTTTAGTGGACGCTGGTGTGGCGCCCACTAGCGTCAACATGCC  
ATCGGCCACAGGGACGGGGATGCCAGCGTTAGATCGACCTGCTGGGACCAGCCGC  
CGCCAATCACAGTCACTTTGACAATCAACCGTCCAGCCTGGATGCATTGAACGTCAG  
CCGGGCAACGGCTGTCTCAATGATGCGATCAGGGCGCACCTTGGGCCCCGTCAACC  
GCCGCAACTTCTCCCAGACGCACGGGGCCTTCGATGGACTGGCTAGTGAAGGGGCC  
AGCCGTCGCGCATCCCGTAATTGATATGACCACCACTGCTGCAAACACTCGCACTTG  
TATTCGAAGAGCCAGAGCAGCCTTTAGCTGAGCGTTTCGCATGGTTGGCCGCAAGTC  
CGTAGATGGTTTGAGTGTCCCATAGCTTTACGACACACGGTTGAGCTGCGTGCCTGA  
GACTAGTCCAGCCGAAATGCTGTGAGCACGAGCACTTGTGAGCGGACTCTCATGGC  
ATTAACAAGTTAGCGCTCGCCAAAAGCGTGAGGGCGATTGGTTAAAATTGCACATG  
CGCAGCATGCACTCTTCTTGCTGTAA

>CONTIG\_27\_length\_11195\_cov\_41.572371

GTATTATCTCGGTAGATAAAGCGGGCGAAAAAGGGAGTTAACTAACATAGACCTTA  
TTTGTGCGAAATCAGCTATGCAGCCCGGTCCCCTTCGTTGATTGCTCGCCTGAAGGG  
ATGGAGCGAGCACTGGGCCGGCATCAGGGGCGCCCTTGAGCGTGACAGCGGTGTGC  
CGCTGGACTGGACGGTGAGGCCTTGGCTTTTTGTGCCCGAGGCTCAGGCCGAGCGGC  
TGCGCGCCAGCATCGCAGGATTTGGCAACCTTCCCAGCCCCCGCATCACGTTTTTGG  
AGGACGTGGTGCTTGGCGCTATCGTTCCTGGAATCGCGGTGCATACACCGATACGA  
CCCCATGACCCCGCTGACTTTTAGCGCTCCAAGTTATGCCCTCCTGCAAGCGACCAC  
TCAGTGCTGGAAGTGTGCGAAGGCCACTCCTGTCAACACGGTGTGGGTGCCGTCCTT  
CGTGGACAACGAGGGTGTGGAAGAGCCAGACGACGAGCCCGAGATAGGTGGCACG  
GCCATACTGGGCTACATCAAGGCGCTGGACCTAGGCACAGCGGCGCACATCCAAGC  
GGCTGCACCATGGCTCAAGCCGGAGCGCTCGGAGACCGCGAACGCGACCTATTGGG  
CCAACCACTGTGAAGTATGCGGCGCCATTCAAGGCGACCACTTCGTCAGGGGCGTC  
GACGGGCCGTTCTTTCCCCAGGATCAGGCTGGCGTGGACGCGCTCCAGGTCATCGCG  
GGCTGCGGCCCGTTGAGCGCGCAAGCTTCCGCATCTCAGTCTGGGTGGATGGACCTG  
GTGGCGAAACGTTTGGCTTGAAGTCGGCCCAGCCACGCCCCGCAATGGTTGCGCTA  
AGCATCCAGGTAAAGTGGATCTGACGGCGGAGTAGTCGCTTGGTTGGGTGTGCCTTC  
ACTTCTGCGCCGCACTGGCATAAGTCGCATCGGAGATGGCTACGGGGAGGTTGGCAC  
CATTGGATGACGGCTGGCTCAGAACTTCTGACATCCCACAGGGCGCGAGACCTAT  
GGTTTCCGAAACCCTCGAGATGCATTCTGGCGTTGCCGGACTCGGGACCGATGGTGC  
CTACCCCCGTGCGACGCTTGAGCAGCGTCTCGCCGGCACTCCGCAAGAAGTCAGATC  
GGCGGCTGTGCCTTTGGAGATTGCTCAGACGGGCGTCCCATACCCTAGTAGGGGTTT  
GCATTCTGGGCCCATCCAAACCCACGGGCCAAAGCTGCCTGAACTTCCCAAGGCCTT  
TAGCGCATCGCAATGCTCTCGCTGAAAGGCGCTAGTGATTGAGTGTTAAGAACTCAG  
CCATCATCTCTTCGAGCTTGGCGAGGTCGCGATGAAGCTTCTTACGTATGCTTGACG  
CCTTGGCAGCGGCTCTCTCCGCTCCTCTCGCTGAACATCACTGCGCGGAGGAGGTG  
AGTCATGGATGACATTACTGGCTTCCACAAATCCACCAGTGGCACGTTAGATATGAT  
TCCACACGAAATCGTGGACGGGCTTCCCAAATAGCCACCTCAGCTCCTTGAGATTGT

CTGCGACCCTTTGTTCCGCGTTCTCATTCGGCCGCGCATTGAAGGCATATTGAGCACT  
CTCGCGGAGAGCGTCGTATGCCTTCAGTCTACGATCAAAGATGTCTTGCTTGAGCTT  
GTTCTCGCCGTTTCTGCCTGTTGCTGTGCGGTGCGCCACTGACGGTATGCAATGTAG  
CCAACCGCGCATGCCACGGCCAGTTGACCAATCCCGGTGAGTAGCTTGATAGCCAA  
GTCGGCAATCTTAAAGTCCATATCGACCATCATCGTTGGTATCCATTGTTGGCAGGC  
TCTGTGGATCTTGTTAGGGTTCGTTAGAGCGGGCGGCACAGTTCCTAATCAAGGAA  
TGACCTGATGCATTACAGCAGCATTGATTTTAGTCAGACCCAGTCGAGCAGGTGAT  
GCGTGAAGCGGCGGAGGAGCTCTATCTCGCCACACATAAGGTGAGGACGAAGGCCG  
GTCTCAAAGTTCAGAATCTTCCGGCCAACGCTCGTGGCGAGCGGTTTAAAGCTGAGT  
TGGCAGAAGCTGCTTGGGATGATCTCCTACTTCGCCGGGATGCCTTTGATGCCCTCT  
CTGCTTGCGGTGCGCCAGCTTTGGACAAGCGCCTCTTGGGCGAGAGCAAGAGATGGC  
GTGCCCCAGTGGTCAAAAGAGGGGCGGGATGCTTGCAATTGCTATACGAGCGATTCA  
GGAAGCATACTCCGTGGTGCAAGACGCAGCCATGCTCTTTCCCGGAAGTGAGGGTC  
AGAAGCGGAACGAGTATTGGAGTCTCCTGGCGGATCCAAGTAATCCGGTAGAGCAA  
CAGATGGTTGATGCACTGTTGGTGTGAAGCGGCATCCGTAGATCTGCACATTAATG  
TGTATCTAGCTGAAGTGTCTCCGTGGCTGACTCAACTGGCCAATGGGCACCTCAAT  
GAGCAAAGCTTGCCGCGAACTAGAGAGTATTCGCGGCAAGGCGGGCTCAACGGAGG  
GTCAACGAAGGGCTTGGGCAAGCTTTCGCATGGGGATGATGCGTTCATCGTCAGTGA  
ACACAGGGAAGTGAAGAGACCACGAAGTGCTTGACGGTCTGAGAGCCAGTGGCTCTA  
CGAAGGAGTTCCTCGCGCCCTTCTTCTTTGATTAATGCCCTCTTGAAGTAAGCCACG  
ACTCGACGGTTGTTGCGGACGAAGTGTGGAGGTTTGTCTCCATCAGGTTCCATCC  
AGAAGCACGTTCTTGCAATTGAAGGTTGTAGAGCAAGCCTGCGCGCTTTGCCACAACA  
TCGAACCTCCTTGCGGTGATACGCTTGATGTCCAGCACCTCAAACCAAGTGCTGGA  
AGCTGTCCCTTAATCGCATCCTCGAATATGAATCCTGACTTGATCTGGTAGCGCCGA  
TTTCGCTCCAAAAGGCGGTGCGGGACCCTATAGGCGAAGCGAAGTAGCATCATTA  
ATCGGAATAGAAGACAGTGCCGTGTCGGGAAAATGCGGCATAGGAGCCATGGAGG  
GGATGCTCGGCTACCGGGTGGTAGACCACCATCCGTTGCCAAGGCGCGTGCTGGTA  
GCGGATCAGTATTGCGTTGAACGCATCTCCGGGGATCCGCAAGTAGTAATCATCCCT  
GGTGTAGGCCATTACCTCCTCGGCAAAGTGGCGCAGATCCGCAAACCTAGTTTCAG  
CCAAATCGTAGGGGTCGTAGCTTCTCTCAATCGAGAGAAGCTGGTGGCGCAGTTCTG  
GCACGGACGTGATTTTTCTGTCGATCAAATACGCCTTCGGCCACGGGCGCTGAATCAA  
TGGCAGTGATGGCCATGCGTTCTGCGTCGAGGTATTGGTCGTCCAAAAGTGTTTCTG  
AGCGTGATCTGTATCCAAGAGGCCATGTCCATCGGTCTGGCAGCGATAGTCGGGG  
AACACGGCGAGCATCGTGAGCTTCTGATGTAGGCTGGTCAGGCCTGCAACGAATGA  
TCGCTCGATAGTATCGAATGCTAGAATATAAAGCTCAGCAAGAGACAGCTTGATCTC  
GCCGCGCGCCAAGTCGGCAATGGCATAACATTAGGGTGTGAGGTGGTGTCTGCTGG  
ACTGCAGGAAGTTTTCGAGGTCGGCGTAAGTTCCCAGGTTGGAGAAGTTTCCATCTG  
AATCGGTTTGGTAGGACGTGAGGAAGTTGCGCAGGGTAGCGGTGTGCGCGATTAGC  
TCGGCGATGCGGTGCGAAACACCATCGGCGAAGCGCCCGTCCAGTGCTTCAACAG  
CGCACTGTGATTGTTGCCGATGCTTTGCTCAAGCTCCATCTCCAGCTCGGAGTCAGTC

TGCGCCACCAGTTCTACATTGATTAAATCCTCAATGCTGCGCTTGATGCGCTGGAGA  
AAGGCCAGTGTTGTAGGGCCATGTAGATGCGCGAGTTTGCCGATAGTGCCTTGCGTG  
ACGCGGCCTACTTGCTCTTCGAGTATGCCTTTAAGTGGCTGGCCTGAAATCCATTGG  
GCTGCTGCGTCCATGTGCTGTGGCTCCGTGGGTGTGCTTGATGGGTATCAGGTGTA  
AGTGGATCGTGCGACTGTCGGGCGTCTACAAGGATGCATCAGAAATCCACTCCCTCG  
AAGCCTTCGTCCGGCTCGGCCTTGGCCTGATCAATGAGTTTTTGGAGCTCGGTGCGA  
AATCCTCGGACTCCTTCCGCCAGCGCGGCGACTTGCTCGGCGGTGATGACGATGGCG  
TTTCCATCGATGTCATGGCCGGACCTGTGGATGATGTCATGGCGCGTCTTTGTCGGCT  
CATCGAATGCTCGGAAGCTAGGGGCTGTTACCCCTAGGCCGTGGCCCAGAAAGCGA  
GCGGCGTCGTCCCAGCGATGCCAAGCCATCCGCTGCATATGAGCATTGATCTGAGTC  
GCCAGGCTGTGCTAGAGCTCGAAAATGTCTCCGAGCTTGGTCTTGCGCTCTCGAAAC  
TCTGGGTGATTTTTGATCAGGTTCTTGATGGTGTCTCGTCGTGGTCCACCCAGTAGG  
CCATCGTCTCCCAAAGGAACGTCTCTAAGGCTGAGACAACTCCGGCGTAGGCAAGT  
CTCCGCGCCATGTTTATGGCATCTAGGTCTCCTTGAAGGGTGACCACTGCCATCAGT  
GCCTCTAGGCATTCTCCGAGCCTCTGGAGCGGGACATCTTTGCCATGCACGATGAGG  
TCCTGCTCCTCGTCGTAATAGGTGACCTCGGTGGGGGGCCCACTCCCAAACCCCTTCG  
ATCCCCTCCACATACTCAGCGACGAACGTGATCACTTCGTGCGGAAGTACTAGTCCGGAG  
AAGCGCTCTTCAAGTTCTTCCTTGGCATCGTAGGGGGCCGCCATGGATCCAGATGTAG  
CCACCTTCCGAACATCATGTAAGGCGTTTCTTGCGCAGGATCTTGGAATCTGGCCTGG  
AACCCTCAAGGAGCGCCGATGCTTGCTCTGCCGGTGGAGCGCCGGAGAGCCACTC  
ATTGTTGATTTTCGCTGGTCTCGGCATCGGTGTAGGCCGATGAAGGAAGCTCGGGCCA  
TTCGTCCATGTCTTCAAGCGGCGCGTCTGTATTACGATGCTGCTTTTCTTGTGGGG  
CGATGTTGTCTGCGTTAGATCCTTGCGCGGCGGCACATGTGAGGGTAGTCCATGCAT  
CGCTTGACAAAGCCGGCATTGGCGATAGCTTTTCGAAAAATAGGAGGGCTTATGGTT  
CCCGAGGACTACATGGCGTATGTCTGCCGAAGTGAATCGATCCAACACATCGAGA  
AGTCTTGGCGAGGCTGGCATTGAATCAGCTGTTTCGATGCTGATCGATACCGTGTTTCG  
CCTTAAGGAGGTCATGTCGCTACCTTTTCGAAGAGCGTATGCGTGCAAGATCCTTCAT  
CGATTATTGCGCGATACACCCTTCACTTCGTTCAAGCTATCCGCTGATCAATGTGAG  
GGAAATCCTGCGGTGTTTGGAGGTGCATGATGTCCCCCACTGAGTTCATTAGGTTTA  
TTGAGTGCGCTGAGAACCAGAACAGGTTGATGGCAAGAATCTTGCTGTCTGTTTGTG  
GCTACGCCGACCAATTTCCGGTGGACGTGGCAGAGATGGCGGAATTGAGTCCCCTC  
AACCGATCCGCGGTCAATGGTTTCCTAAGTTGGGTGCGAGTGGAATCCAGGTGCCCGG  
CTTGGGGAAATGAAGGCTCGCGGTGTGGCGGAAAGGATTGGCGAGCGTCTTAGTCT  
GGTGTAGGTGAGCTCTCTCGTTCGTTTCGACTTCTCTGTGGCGAGCGGGTCAATCGGC  
TGTGCCCTGATCTTTGAGAGGGCATCGTCTGCATCCGCAACATTCTTTATCTCGCCGG  
ACAAGACTTGAAAGTAGATGTCGCGGCACTCTCGTTCGGAAAGGGAAACGCTGGGC  
CCCAGGCGCGTGAGATGTCATGCCATACGGCCATCCTTTTTTCGACGTCCAGAGCA  
TCAGCGGCTTTTTTGAGACGATCAATGCCCCCGCGACCCTCGGCTAACGCTCGGCCA  
ATCGCCAGCTGGTGCTCGTTGGGCGATTCTCGACCCCATTTTCGCCTTCCGGGGCCT  
AGTAGAACTCTAGGATGGCCATTGCGGCAACGCTAGCTGGCACTCCCAAGCACA

ATACATCTTGGCGTATTCTCTCGGCGACATGTGAAACGGGCATCGGTATCATGGCAAT  
GACGCTTCTGACACATTCTGATGTTTGATCGCTCATTTTGCGTTTCCATTTATAAAGT  
GGGCTCTGGAAGCTGGAGGATGCAGGTTCGCCGAGAAGAGTTTAATCGCGCGTTGC  
TGACGGATAGTCTCAGAATATTTCCGGTGCCGTTTCATCGCAGCCCTAGGGTTCTGTTG  
AGCGAGGACGATGACTTGGTGGATTTCGCCCTGCTGAGAGTTGAAGACACCCTTGAC  
GTGCAGGTTCGCGCAGGAATCGGGTCTCCTTGGTGTGATGAGTTGAGGGTTCTTCTC  
TATGGCCGCCGAGATCAGCCAACGCTCTAGGAAGGACAAGGACTTGAGCTTTGCTG  
AAGGCCGTTTCCGGAATTTTCCGCTTGGCGTCCGTGCTGGGATAAGGAATAGGACTG  
GAACACCTGCGCCCTCATCTCCAAGAATGTGGTTGTAGTTCGTGATGTTGCTTGGGT  
TTAGTGCTTCCCCGAGCAGTGTCGTCTTGCAGGCTTGGCCAACATAACCAGGGCGTGA  
TTCCTCCGCCCGCCCGCTTGCCGAAGACGTAACAGCCGCAGGCTCCTGAAAGGCCTT  
CCTCCCCTCTTTCGACTTCTGCCTTTAGGATCTTTGCCGACTCCTTTGTGATGATCTTC  
TTGCTTCCATGCCGAGCGATTTTGAACGGCCCCGCGACGTCAAAGTTCATTGCGTAT  
CCGATTGTTGAGGATGGATTGGGATTACGGCTGCAGCTACGCTTACCGAGCCCCTGC  
GAACATCGGGTGCATCCTCCCGGACGGTGATGTCTGGCGCTGGCGCCGTGTAGCCA  
AAACGTTTCAGAAAAAGGCCTCATAGCAATCCCTGCTGAGCTTCTGCTTTAGTGATGA  
AGTCTACGATTTGCCACCTCTTTGTGAAAGGCGTTAGGCGCGGTGACGCTTGACGCG  
GGTCCCTGGGAGATGCAGTGATGCGTGACCAATGAGGGTCTCATAGGGGGGGCACG  
GTTTGGGTTGACCCCGCCCATCCGAATGCCGTTTAGCCCGCAGGCCTTGTAGGGCAT  
GCACGTGCTGTCTCCACCAGCGCTGGGCCTCTTGAAGGGAATCTTGGCTTCGCTGTC  
CCGACCGCAAGGGCGAGCCTCCTCCTCGACGCTGGCGCTTTTTTGCGGCCCTTCGCT  
GCGCGCCTAACGGTGCTTGTCTCTCGGGTGCGGTAGGGCCGGACGCTTCGCCTGTGCG  
TTCCACGAGGGCGCACAAACGCGCTGGTGGAGAAGAACCGATGAAGCGCACCCAAGA  
CCTGAAGGCTCAATACCAACTCCAGATGGACGAAGAGGGGATTCTGCTCGCCGCTG  
CGACCATCTTGGAACAGCGCCTTCAACGCCAAGGCCGCATCCACAGCCCGGAGCAA  
GCCGGCAGCTACTTGGTCGCCCCGCTGCGCCCCACCTGCCGCACGAAGTGTTGCGCGTC  
GTCTTCCTCGACACCAAGCACCATCCTGGCCACCGAGCACCTCTTCAACGGCACA  
ATCGACGGCTGCGAAGTCCACAGCCGAGTCGTGTCGAAGCGTGCCCTCGAGCTTAG  
CGCTGCTGCAGTCATCCTGTTTACAATACCCGAGCGGCAATCCGGAGCCCAGCGA  
AGCCGACCGCAAAGTCACGAAGCGCCTGGAGCAAGCCTTGGGCCTCCTGGACATCC  
GAGTCCTCGACCACCTGGTTATCGGCGGCCAGCAGCACACCAGCTTGGCGGCAAGG  
GGGTGGGCATAGCCCGCCCCCTTCATCCCCGTCCCTAGAAGCAGACGAGAGCGGCAG  
TCCGTGCTGCCGCTCCGACGTTACATCCACCAACCCACGGCTCTTCTCAAGAGCCT  
TATTTCTTTGTGCGGAATAAGGGCCACAACAAGCTTGGTCCCTTTAGGTAGTTCCGCG  
CGCAGTTGCGCCTCCATGATTCTCTCTTTCAAGTCGAACCAAGGGTCCATGTAGCCG  
CCCGGAACCTTGAGCAGGTAGTGATAGCTTGCATATCTGACCCGGCTGTGGATACAC  
ACGATAGTGCCGCTGGGCAGCTTCGCGGAAGGGTTCAGTCGGCAACCACCTTTAC  
GTTTTTCTTGTAAGAGCATGGGCGATTCATCGATCTCAAAGCCTTCTGGCTTATCG  
TTTATCCCGGCCGACTTTTCTTTCTAGCAAGCGCTTTGCCCGCTGGTATGGGATGT  
CCAAGATCGATGCCACGCAGGCAGCCGCACAACCCCATTCGTCTTCTGCGATACAA

GTTCGTATTTCCGCATGCGTCCTATCCTTGTCTGAAGTTGCTGCATTGTATGGCTATC  
CATAACAGCTGGAAAGGGCCGCGCTCAACTGTCCATGGCGAAGGGTAGGGCGGTAGA  
CTCTTAGGCAGAGCAATGGGTTGACACCGATATGGAGACCGAACGCATGGAAACGA  
AGACGATCAACGAACCCAAGGTCGGTGAGTTCTTCCAGTTACGTCCCGATGCCCCGCC  
GAGGCGGAAAAGGCCACGGCGTGGTCTTCGAGAACGAGAAGGCATTGCTGTGCGCCG  
CCGCGGCTCATCTTGAAGCCGGACGAGGGTGGGTTTCCTCCACTGCACGAACTCCG  
CGCTTGGTCCACATCCCCAGCGAAGGGGAGTTGCCGCAGGACCTGGAGGGCGGTTT  
CAGTGGCTATTGGTTGGTCTCCGAACGGCTTCGCCAAGTGATGGAATCTGTGGACGC  
GGATGCCTTTGTTTTCGCTGATGTGCGACTATCGCCTGGCCGATGGCTCCAGGGGGCC  
GACGGTCTTCTCTGCGACGTCGTGCGCACGTTGGATGCTTTGGACGAGGAGGCCTC  
CGAACTCGATATCAAGATCAGCGATGACTATGAGGACGGAAAGTATTACAGCTTGG  
CCGGCGGGAGTCGTTTGGCTTTCAAGCGCGACGTGCTTGGAGATGCCACGTTTTC  
GGCTTCCTTTCCATGGCGGTGTTTTTTGCGATCGGGTGTTCAAGGACGCTGTTGAGGC  
AGCGGGGATTGGCACC GAAGGCCAGTCGGATGGCCTCTGGTTCTACGACGTAGTGA  
ACCGTTGACGCGAGCCGCCAGCCAACAGGAAGGAGCCTGAGTCATGCCGAACATC  
GGACGCTTTTTTCAAGATCACCACAACATCGAACAGCAGACGCTCAAGAACAGCGAG  
TTGCTGGCGAAGCTTCAAGAGACGGGCGGTTTCGACATTACGCCCCGGAGAATCG  
CCTGTTCTTGCCGTCCGATCCGCAGTTTCGCGCAGGCGTTGGACATTACGCCGCACAG  
CGGCGGACCTCTTGGTGCCTACCAAGATGGCGTGATTGAGCGCTTGGACGATCTCCA  
GGCGACGCGGGATGGTCGCGCCGCCTTGCGTGGCGACCCTGAGGCATTGGACCGCG  
TTGCCCAGCGTGTGGAGCAATTGCGCGACACCATCAAGGTCGGCTTGATCAATGGCG  
ACTTGAACACCAACACGCCCCGTGGGCCTTACGTCCACGCAGGCGAGCGCGAAAGTT  
CAGAACTTTTTTCCGTGGCACC CGGGCTATCACGAAGCCACGCTACACAAATCGAT  
GCCCTGAAAGGCTTCACCGGAGTGGATCACGGTTGGGGTGGCGTGGCGAACTCTGA  
GTTCCGCATTGTACCCGCGCTCGATCAGATCCAGGTCAGCAGCACGGCCATTGCGCG  
TGGCGGGAATCCAACGCTGCAACGAAGTGGGCTCTCGGTTGCCATCGCCAATGCCC  
ATCACGACGGACGTGTGGTGCTTTCGGAGCAGGGCATCCTCAAGGTTGAGCAAACC  
TTGGGTGAGGAAGCTGCACAAAACCTCCGAGTGCCGCGCGGGCAGCGCGGTGATGT  
CGCCATGCAGCTGTTGATGGGCGAGGCTTCTGCTCGGGGCCTGACCCGTGCCGGCGG  
ACTCCTGACCACAGGTGCCGACGCTGTGACGACCGCACGCACGGCGGCTGCGTTGA  
TGGAACAGGGCAACACCACGGCTGCGCAGTCGGAGGTGCAGCACGCCATTGCCCCG  
AACGCGGGCGGCTGGGCTGGTGGTGCCTCCACGGCAGCGGCGCTGGGCAGCAGCGG  
AGGCTTTGTGCCTGCGGCCTTGGTGGTTGGCGACGCGGTCCTGATGAGCAAGGCCTT  
CGACAAAGGCGCTGACTTGTTGGACAACCGCGCCATCTACAACCAGAGCGATAGGG  
CCGGGGTGGAGTGGCAGTTCAGTGGCCGGGATTGGCAGCGCCAAGGCGCTTTCGAG  
CGCGGAGCCGATGGACGAGACACTCCTAGTCAGGCTCCAGTGGGAGCCAGCTACGC  
CAAGTCCCAAGAGTTGGGAGCTATTGCGAACGCCAAGGCCGCCGAGTTCGCGCTGG  
GAAAAGCACCAACCGCCTCAGGATCCGTTCAATCTCCCGGCCAAGCCTGGGGATCAG  
ACAGGTCTGGACAACCAGAATTGGCAGCGCAACCCGGCTACCGAGTCTTGGGAACG  
CCAGGTCAAGACTGGCGTGGCGGGTGCAAGCGATCAGGGTGTTTACGAGCCTCAGG

CCGCTACCTCGGCACAGGCGCAGCGTTTGAACCAGGAATCCCTGGCTCGGATCGAG  
AACAAACATCTCGACCGGCCGCGAGGCGATCGCCAGTCCTATCTGGAAAACCATGC  
CGCTCAGCGGTACAGGATTACGGAGTGGCGGTGCCGGCGGCAGTGGAAGTGCTC  
GTGCCCAGCAGGGCCGGGTGCAAGGCCACGATGGTCAGACCTACCAGCGCAATGAG  
GCCGGGCAGTGGACCGGCAGGGACGGGGTTGCCACCGGCAACCTGGCAGTGGAAC  
GGAGCTACCAACCAGATGCGCCAGCCGTCCCTGGAGCGTGCTCAGGAGAACTTGG  
CGGCCATCCAATCGCGGCCAGCGCCACGCCCCGCGCAAATGGAGCACAAACGAGCTC  
CTTCATCGCTACCGGGCCGCGGGCGTCGACCTCAACGCCCAAGAGAACAATCTTCAA  
GCGGTGGAGCTGGCCACCCAGCGCACCAAGCAGAACGAGGGCCTTGCTGGCCCCGAC  
GATGCAGCAACTGAAGCCGAACGAACACGGGCAATACGGCTACGACAGTCCCATTG  
CCCATTACCAAGTTGACCAAGACGGGTGGCCCCAC

>CONTIG\_28\_length\_11039\_cov\_16.441441

CCTATCGTTTTTAATCGTCGATTCCGCTTGCGCGAGATGCTGCCACGACTTGCCACGG  
CCATGATGCAATCCACACCATGCCCAGAGCCGGTTTTACGTGCAGCGAGCAATTTTC  
ATGGCTGAGAGTCAGGGCTAATCAGGTGCTTGTATGAGTTTTTCGCTTTTGCGCGAA  
TGGCTGGCTCAAAGAGAGCTAAAAGCACTATTGGAAGAAGTAAAAAACGGCGATAA  
AGACTCAGTCACTACCCACAATAATTCATTCAAAGGTCGGGTCTCAGATGTAGAC  
CCGACACAAGAGACCTAAACCCTTGAGAAGGCGACCGCGTTTCTTATGTTTGCGTGA  
AAAAACTGCCCCTTCGAAGGGGCAGCCCTGAATTGTTTCATACAGATATGCACTGACG  
TTGTAATACTGGTAAATAGCACCATCTTTAAATTCCAACCTCTAAGGTTTCCGAGGCT  
GGATCATAACCAGCCGAAACAATATTTGACGAAAATACGGCGTCTCGGTCCATTACT  
AGCCCTCTTCAGGTTTCATCATCAATTGGCAAACGGGTAATACCTAGATCCTGTGTGA  
CAGCATTGGTCTGCTGACTGCGCCACGATGCGACTACACGGTCGTATCCCTCTGCTG  
AGCGTCGACTAGCCCATGCCTGGGTCACTTTCGGATCGTTACTTCTAGGCAAATGCT  
CTTGGCTTGGCAATGCTACACGACACCTGACAGGAAGACGGGCAGCCTCGCCAGTG  
ATGATTGCCTCCCCAGTTCGTAAGACTGGCAGCAGATCCATTAGACCTGCGAGGTTG  
TCCGGCAATGTCCCTTTCACTCGGGCACGATCCACAGGATTGGACAAGCGAAGAGC  
AATGATTGTGCCGCACTGAGATAGCACCGTTTCGTCTACCTCAGCGGGCCTTTGAGA  
GACGACCATCGCACCCACTCCGTATTTTCTGCCTTCCTTCGCGATCCTCTTCACTACC  
TCTGATGCAACTGTGCCGGAGTCCGGACCAAGGTAGCGATGCGCCTCCTCCATGACC  
ACTAGTAGCGGGCGTTTCGACCCCGCCTTCCGACTTTTCTCTGCTCCAAAAGAGCGCT  
TCGTAAACGATGCGCAGGATGGAGCCGATCAGCCGTGTGAGCACAGTGCTAGGAAC  
ACCTGAAAGATCTAAAATCGTAATTTGCTTGTCGTGACCTAGCCACCCCTGAAGAAG  
CTTGTCTAGATCACTGCTCACTAGACCGGTTGAGTCAGGTTCCCAGTCGCCAGGATG  
AAGTAGAAAGTCATATCGACGATCCAGCAGGCGAGAGCGAAGCAAGTTTAACGGTC  
TGCGAATGCCTTTGGCCGCACCATTAATGAAAGGCGCCTTGTTTCCCATGGAGTGCG  
GCTGATACTTTGGCGGAACCAATGAGTCAGCGTCACCGACGTCTACGATGGCAGGTT  
GTTTCGCGATTGGCGTCTAGATAGGTAGTCATTTTCGAAGTCGATCAGCTCATACAAA  
GCTGCTTCAAACCTAAACGGAACCTGGACTATCGACGGTGAGGGTCTTCGAATCAATTC

CTGTTTCGAGGATACTTATTTATTCCCCTATCCTTTAGTTCCGCAATCTTATCGGTGAA  
AGTGATTTTCGTGTGGGTCTGTAAGTCCACCTGTTACGAAGTCTAAGAGCTCACCGGC  
CTCAAGCGCCCAGTAAGGAACAAAGAGCGGCTCCTGTCCTTGAGTAGGAGTAGCGC  
TAAAAACGGTAGCCACATCTGCCAAGGCTTTTGTGTATTTCGCCATGGATATCCAACA  
TTAGAATTCGAGCACCTGGCGATCCGACGGCCTCACCTTTCTTATGATGGAGCGCA  
GCAAACCTTGCAACAGTCGTGGATTTCCCTGAACCGGTCGATCCTAAAATTGCGGAAT  
GACGGGTGACAAGTGCATCCAGTGACAGACGAACATCGATATTCTCAGCGCTTGAA  
AGGTGCCCAATGACAACCTTGATCGTCACCAATCGAACCATAGATTCTGTCGAAGGTCA  
GTCTCTGTTACCAGATGAACTGAGTCATTAATATTTGGATGCTGACTTAAACCGCGT  
TCGAATTGTCCACCAACGGTTTCACCTGCCAGCTGGACGGTCATCCATCTGCCTGAA  
TCAGCGCTTGAAATATTTGCTTGCGCAGGAGCAGCGGTGGCTCCGACCTCTGAGACG  
ATACCAAACAAATCTTGGTATCCCTGAGGGATCCTTACGAAGCTGCCTACCTGCCCT  
ACTCGATAGGTGTGCCCATTTATGACTGCGAAACCTGAGTCGAGGGACTGGGCCAG  
CCTCACAGTCAAGGTCGCACCTGAGACGGCGCTAACCACACCTAAATATGTGGAT  
CGGTCTCACTCATTTTCGGGCCGTCCACAGTTTGAGATTGGCCATCGCTACCGCCGTC  
TGCTCTCGGTTGCAGCAGGGGCCGGTTCGTCTCTCTTTAGAGACTGCGTAATCAGATC  
GTTAGCCTGAGCCAATGCACAAAAACGTGAGAAGGCTGAGAAATCTCCCAACAAAA  
AAACGGGAGGGGTTTTTCGGCCATCGGGACGCCCAGAATGTATCGCGGATGCCACCC  
CAATTTTTTGGAAGCTCTCCTGGACGCCATTTTCCTGCAACGCAGCCTATCACTGCA  
CCATCAGCTGCATACACACTCAAATTAGGCCTGTTCGTTGGCTAATTTAACGGCTGGC  
TGTTCTTTTTTCCAAATTCTGATACTGGAAAGCAAGGACGGCAGTATTGGCATTCAAT  
ACCAAGCTTTCATCAAGAACTGCGCAGATGTGTGCATCTCTAAATGAAAAGCCGACC  
GCCAATAAAAAGCGAGTCCGGGGTGAGCAAGAATCTTTTAAGCCTTTCGAAAAGCGC  
AGAGTAAGGCTGCTTCTGAGTTAAATCATATTTTAAATGATCTGGATAGACCAGTTC  
AGTAGCTTCTCTACCATGACCACGAACAACCTGCCCCATCTTCTAACGCCCAGCCAAG  
GGAACCATGCATCTTCCAAAGCTTTGCCCATCGGGCAGGCAAATCGTCGCCTGCCAC  
AGACACTGGGTGGAAGAATGGTTTACTGCCCCCTGAGAAACCATCGAAGTATGGAC  
TCCTCACCTTTTCGAACGCTTCTTCGAAGAGGAAGTCATAGTTCGTCTGTAATATTTTC  
TACAGAATTTGACCTGACTGTCCCAGTAATCCATGAAACCAGTTCCGAATATGGGTT  
CCGATCTTTTCGGCAATCGGACGCCGACTATTTTTCCGATATTTTACAAATATCCTTT  
CCTAGTTCTTTGTAACCATCTGAATCCAAGCCTTGGACTTCGGTTTTTCCTAATGCCT  
GTTCTAACAGTCGAACTCGTGAAAGGACAGATTTCGATATTTCGCACCGCCGCCTAAAC  
TTGTCTTGATGGCATCGACTGCAGCAGCTTGCTTCAATGTGAGGCCTGAGGTTGCTT  
GCTTCGTCAGTGCATCTACACCTGGAATCAGCGGGTTTCCCTTGGGATCAATCTCATT  
CTTTGCGTTAACAAGAAGAGCAAGGGGTGCCCTGCACCAACGAGTAGACCGACTC  
GCTTTCTGCCTTGGGAAAGCACCTGCCGTAGATCAGACATAAACCAGATCTGGATTGT  
GGAACGTTTCCATCGTTCGCCCCCTGTGCGTGATGCCGCCGAGGTTCTTCCGTAGAA  
CCTCCACATTCGGCACCATCGCTACGGGGTTAGGTTACATCACCTCACTCTGTCAAT  
CATCTAGGTAATCAAACGACTGACCGGGCACCGGCAGCCCCTAACGTTCCGACTTTC  
TGGTCTGCTCCTTGACCTTACAAAGCAGCTCCTTCTGCTCCTTGGCAGTCATTTCGTCC

GAACTCCTGAATGAGTTCGGCCAGCTCGTCTGTCTCTGCGTAGAGGTAGGCAAGCGA  
GACGCCAAGGGCGTCAGCCATCTTCTGAGCCGTCTCGCTATCGCACTCATGCACTGC  
CCGCTCGTATCGATTGATTCTGAACGCCTGCGACATCTTCTGGTAGTCCCATGAGCAC  
TCCTAAGGCCTTCTGGCTGAGCCGAAGTGTCTTCCCTCCGCTTCTTCATACGGGGCGGC  
GAAGACGACACGAACACTGCGGGCGTTGGGAGAAGTCATGCCCAAGGATGAACGT  
AAGCTACGCTTCTCGTAAATTACGTTGCCCCGTATCTTACGTTTAGCGTATCTTTGCCC  
CATCCGTCAACCATCCATAGGGGAAGTCATGGGCACGCCGAAGCACGAAGTAGCGG  
AGGAGATCCACAGGCAGCAGGTTCAAGCACAAGCCGCAGCACAGCTCACGCAGCCC  
TTGCTCAAACGAGGCTGGCGCATTGCCTATGTGGGATGGGCCGCTCCCATCCTCCCT  
GTCATTGGCTTCTTCTTCCCTGATCATCCTTTCGATCGTTGCGCTGATCCATGGCGTGT  
TGGCCATCGTCAAAGGCAACACCTCTGGGGGCTTACGCCTGGTCCTGGCTGCCTGGC  
TTGGATCAACCGGGGTTGGCCTGCTCTGGATGGGTGTCTATGCCCTTCTCTCTTCGCT  
CTTTTAATCAAGGAACGCGCATGTCTAAGGTTGCGCTGATCACCATTGGCCTGATGG  
TTAGCATTTTGGCTGCTTGCTCATCTAGTCCATCTGAGTCCAAGGCTGAGGAAGCGA  
TGCTTGCCATATGCCAAGGCCAATGTTTCTGAGGATGCCAAGCTCACCAGCTTTAAGC  
TTGGGGAATGTTCTGAAGTCTGATAATGGTGGCTACAACCTGCCCTGTTGAATCGCATA  
TCGTTGCGATGGGCGGCAATTTTCGATCAAGACTTTAAAGGTGTTTTACCTTTGCCA  
AGATCGACGGGAAATACAAAGTGGTGGGGACGGTGAGCCGCACGTTTTAAAATAAT  
TTCGAATAATTTTCGTCCCAAAGCCCCGCAAGGGGCTTTTTTTATTGGAATCGCCGAT  
CGAGGCATGGTTGGGAAGGGAGCACCCGTCCTCTTATCGAAGAATCAAGTCGTGCA  
GCGCCATCTTTCAGGCGATTCTGTCATGGACTCACGAATCATCTTGACTGAAGTTGA  
TTCCGGATTATAAATCTGACATGGGCAAAAAAACGACACCGACTGAGTATCATCTCG  
CCAAGCCTCTTCTTGATGAAGAAGAGCGAGCGTTCCGGACTGAAATGGTAGAAACA  
ACTTATAAAGTCCTCAGAGCCAACAATGTTTCGCCCCGCCAAGCGAGTGAAGCACCT  
ATCCCAACTCTATGTCGATGGCCTGATTAGTGATAAAGAGCTAAGCACACTCTTGAA  
AGAGCGCGTTTCAAAGTGATTGAACAGCGCAACAAAAACAACCACTAGGCTATAGT  
TGACCGACCGTAATTTTCGCATTATAACTATTGAAACAAGGCGATTTCGCAGGAGGAAT  
CAATAATGGCGACACATAAAATCAGCGAACAAGAGAGAAGAGACCGAGCAAACCA  
AGTCCGGCATGCAAAGGAAGCGCTTGCCTAACAGGCGAAGAAATATCCTTACCAA  
CAGAAAAGCTGGCGCAGCTTTTCATTGAAGGTGAAATTGACGCAGATGAACTCGAA  
AGCCTTATTGAGGGCGGCACAATCCACTAAGTGGAAGGAGTCAAAAATCTCTTTG  
GTTAATTTCAACGTAACACGGAAACCCGCGCCAGCTCTACTAAGAGGACCACTATG  
GTTATAAATTAAACCGCCCCATAGAAGCAAAGTTTGGTTGAGTTTAAGGCTAAGCCA  
TTGACACGCCCTTGCTCCTCATTAAGTTGGGTGATCAAAGGTGGCTCATGAAAAAG  
ATCAACTCGAAGACAATTTAAACGAACGGCAATGCAGTGTATCTCGGGTGATATCG  
GGTAATTTGGTGCTTGAAGGCTTCACGGTCCAAGGGCCAAACGCGGACCAGCGTTTC  
ATAAGAATGATCAAGCAGCTGCGTATGGCACAGGGCTTGATCAACTCCTCCTCCCCG  
AATACTTCTAGCGATCTCCATCTTCTAGAAGACGAAATCAAAAAGTATCGGCGAGAC  
ATCAAACGAGAGAGAGAAAAGGTCTTGGCGGCATCGTCGGAAGTTACCCAGACCCTCAG  
CATCACCGCCAGCGTTATTGGCAACATCCCTGTCGATCAGATCAACCAGGACCACAT

TCGCTCAGTGCTCGATAGCTTCCAGTGGTGGCCCCAAAATGCGAAGTCCAGAAAGG  
AGTTTCGCGGAATGAGCACTACCGAGGTCCTTGCCATAGGCCGGTCACGCAAACCA  
GTGACCATTGCTGCTAGCACTTACAACAACCATCTGGCGAGGATCTGCGCATTTTTT  
CAACGCCAAATTGCAATAGGTGTGATCAAAAATTCTCCCTGCGCTGGCGTCAACACG  
AAAATTGACACATCAACAGAGAGAAAAAAGCAGAAGGCCGCTCTACATCGAAGAATT  
AGCTGCGATTTTTGAACCGACTGAATTTAAGCGCTGGGCCAAAGATCGTCCAGAGCG  
GTGGTGGGTGCCGCAGCTTTGTCTCTACACAGGTGCCCGAGCCAGCGAAATTGCCCA  
GCTTCGACTTTCGATATTTCTACCATTGATGGCATTAGCTGCATCACCATTGCGGTC  
ACTCAAAAAGAACAGCGTGTCAAAAATAAACCTCTGTTCGCGTCATTCCACTGGCT  
CAACCACTGATCGATGCAGGCTTCCTTATCTATGTCGAAGAAGTTAGAGCAACCAAA  
CATCCGCGCCTGTTCCCCCATCTCGATGCCGGCTATACGCTTTATGAGGGTGAAGCC  
TTCTATCTTGTTTATGGTGACAAGGTAATTCGGGACTTTTGCAAGCGCCTTAAACAA  
ATGGGATTTGATAAAGGCATCGGCTCCCATGCTTTCCGCCATACTTTTTCAACAAATT  
TGACCAAACATGGGATTGGTGTGGCAGAAGTGGCTTTGGTTACCGGCCACGCCGTT  
AAGGATCGAAGCCGGACAGCGTGCATGTCCAGGACTACAAACCTACATTGATCGG  
GATCAATGTCCTCCCGAACTTAAAGCAATATACGCGACGGTTTCGAAATTTAACCCA  
GGCGTTGAATTGCCCCGCTACACCCCTGGACAATTTGCAAAAGCATTTTCAAGAAAG  
GAAAAATTTAAGAAGTAGCTTCAAAAAAACGGAAGTTGAACACTATTGAGGCACCC  
CGAAACGAAGGCGGGGATATTCACCCCTTTCTTTGCTGTTTCCACAACACGGTCGT  
AAGCTTCGAAAACTCTTCTTCATCTGCCAGGTGAGCACAGTATTTGTATAGTTCCG  
GGTAATCCAAAGCCACCACGTCTACGTTCTTCTCTGCCATGATTTGAAGAAGTGGCG  
GGCTGTATTCAAAATACTGATCGTTAAAGAGTTCTTTGACTACAATGAGCGTCTTCTT  
CTCTTTATTTCGAATATTCACGCCATGCAGCTCATCACC AATGAAAAAGTCTAGCGT  
ATGGTCGAACCTTCTGAATGTATCCGAGCGCACCCCTTCACTTGACCAATCGCCTTATT  
GAGCGCGTGCATCACATTCGAACGCTTCCTCGATATTTTCTGATGACTGATTGCTTCG  
GTATTCGGGCTGTCCTTAGCTTGCACAATCAACACTCTTTTACGAGTCACGACTAAG  
ATATCGCACACCTCTTCCTTGTCGTGACACCGCAAGGGGCTGTGATAGATTTGCTTTT  
GTTCAAAGCACATTGAAAGGCAGCGAATGATGTCTTCTTCTTGATAGCTTCCCGGCT  
CTTTTCTTTCGACCTGGGTATGGCTGTAACCGCGAGCGCCGTGATACTGGTGTGACTT  
AGGCTGCAAATCCTGGATGGCCACATCCCCAAATTCCATCTCAGAAAATTCTATTAC  
GATGGCTTCCAAGTCATCACGGTCAGTGCGAAGAGAAAACCAATGCGGGATCGCAT  
CTAGCAGTGATCCGAGTTGCATCGGGTTTCTCAGAAGAAAATTTTAGCAATCCGCT  
GGCGGCTTGGCTCTGGAATGATCGCCTTCGACTTGAAAACAAAGTGCTCTCGTGAGT  
GCTCGTCAAAAAAATGGACAGATAGACTCTGGCTATTCAAAGCAGCGAACAGGTCT  
TCTGATAGATCATCATCCATCAGAGGTGTGACCAGAGTCAGTGGCTCATCATGATCA  
TCGAAGAAAGCCGTCAACAATTCCACGACCTTAGCGCCTGAAATTTCAACAGGCGC  
AAGATACATCTTTATAAAGCCTGACA ACTTAGCTGCCAAGATGTATTCCTTGGGCAT  
CTTAATTATCAAAAGGTGCCCTATTCCATCGGGGCTTCTTTTGGGAAGAATGCCCCC  
TGGATAATGTCGATTTCCGGCAGAAGCGCTGGATATGAGAGCGTAATTACCATTT  
AAAAAACCTCCTCAGGCCGGCTCATCCTCATCAGCTATCCTGGGAACTTTGGAAAAC

GCTCGTTCGGATGCTTTGCCTTCCATTCTTTATAAGCCGCCGATCCTTCGTAAGCTGC  
AAAAGCACGCGGAGTCCGGCCACGACCCGACCAAGTCTCTTGAGTGTGTGGAAGCC  
AATACTTGGGAGCGACTTCCTTCTTGTTGCCGACTGCCTTCTTCGGGCGGCCTGGTCC  
GCCAACGAAAGCGCCAAGCTGAGCTGCAAGATCTGCTTTCTGCTTGGCGGTAAAAT  
GCTGCCCCGAAGCGGCTCAACAGATCAGATACCTGCTGGAAGGTGTTTGATGCTTCTT  
GTTCAATAAGCTTGGCTTCTTCCTCTTCAAGCTTTTTAAGCTCTTCGGAAAGTCGGGC  
TTTGGCAGAAACAATGGAATCAAGGGTGGGTTTTGACATATTCATTCCCTTCTAATTTT  
TTATCAATCCAGTATTGAAGCCAGAAGTGAAGAAGCTTTTACAGGAGCCTTCCCTAC  
TGGTTTTTCTTCTAGCTCAGATAGCAACTGTCTATACAAATATTTTTTTCTTTCAAAG  
AACTCACCTGGCCACGCATGGTTGGTATCTCATGAAAGGCTTGCAACATAGAATTT  
AGAGTCATCCGCAAGTAATATTCTAAATTTGCACATAGCAGTCCAACCATAGCAACG  
GGCTGTGCGCTATGAACAATGTCGCACCTTGCCCTATAAATTCTCTGGACCTGCCAA  
CGGACTCGCCGATCATGAACTCTAAGCATAGCCGCTATCTTATCCTGGGAATTCATG  
TTTTCTATGAATTTCTTCAAGTGATAGAAAAAATAGGGCTCATCATCACAAGCTCCA  
AGAAGATCCTGAGCAGTGTCCGGAAGTGGACTAACTCATATAATTTTTTGTGTGTCA  
GTTTCATGGGGCCGAATTAACCCACCCCTTATCGTTAGATGTTTTTTTAAAGTTTCAAA  
CGCCGACCGGTAAGCTGACAAATGTTTAGAAACGTATATTAATCCTAAGGTAGGCG  
CCAGAGCGCCTTCCACACCAGCCCCTATTGGCCCCGCCCCCTTTGCTTCCTTTCGCCAA  
GTATTCGGTTGCTGTCCACCAGTTCACGAGCTTATTTTCAAATAGGGTGACGCTAGT  
CCCTACTCGATATAATCGAAATGCCGAAAGCATAACGATCTCTCGATTCCGCTCTGGAT  
TATGTCGCGCAAGCCTATCGCCTGCAAATTACCAAAAAATCAACAAGATTTCTGT  
ATCTTTTTTCCCCTTCGGATTTGGTATAAGCGTAGGCAATGGAAGCACTAAGAGCTT  
TTCATTGTGCAGGACTAAAAAATCTGTCGTTACCCGCAGATTTATTGCGTCATACTTG  
TAACGAATGAGATCTAAAAGCTGACCAATTTGTCGATAGGCCGCCGCCCGCCGAGCAG  
CCTTCCATCTCTACTCTCTACATCTACCTCAGCAAATAATCGCTGATCATTTTCAGTC  
CAACTTTGTGCGCGAAGTTTTTTCGTTAGGGTTTTTCGTAAGTTCGATAACATTAGCGG  
GCAGGGATTTGATGATTTTGACATCACCATATCGTCCAGTGATATTTTTCCCTTTATC  
TGGCATCCCGTCAATAACGAAAAATGCCCTATAATTTGTGGGGCTTTCGGTCATCAT  
TGATCTGACCTTACCAAATCGCACCAAGAAAGCTTCACTCGTATCAGTGGACTGCAC  
GGAGCCATTAAGTGGCTGAGGTGGAGAAGTTTGTAATTGCATACAACTTTCCAA  
CCCAAACCCTTCATCATAGGCGAACTTAACAGATCGCGGCTAGCACGCTCTATCTT  
TAAATACTCGATCTCTTCTAGCGCTGGTGAGCTTGCAGATCCATCATTAGCGTCATTT  
AAAGTTTCTTCAAGCCAGTCGAATGTGTCATTAATGAAATGAAGTTTTAAAGACTGA  
TCCAATTCACGAACAAATGATCCTATCAGCGTGCTTTTCTGCTTGAATACGCTCTGAC  
CTTCCTTGTCTTTTTTTCGCAGCCTGAACTGCTTCTGCAAGACTAGCTACTACCTCAGT  
TAGCGCCTTGTAATGATTTGACCTGAATTGCAGAATTGGGTGATCAGATAAAATTC  
AATCGCCTCTTCCGCTACTATTGCTCTATCGCGGTCATCAGCATGTGGGACTTCACTG  
ATCTTACTGAACTCTCTCAAAATGTTGAGCGGGTTCATTGTTCTTAGCCGGTATGAAT  
CAAGCGATGATTGATGCACCATGTTGAACCATGCAGCCAGAAAGAAGAGCTGTCTG  
TTCGTTAAGGCATTAGCTGCGGAGCGGACATGGATGTCGATGCGCATGTAGTTGACG

CCGTAGTCAATTCGTGGTTATAATATAGGTATCGCTGAACATCTGCACGTTTCGGCTA  
CCAAAAAAAAATGGAATTGGAAGCACAGGCTGTGGCCTGTGTTCCCGCTGTGCTTCCT  
CTTCCACCTTATGCAAAAAGAGCCTGTAAGGCTCTTTTTTTTGCCTCAAAATTTGTAG  
TCTCCCTAGCAAGTCAGTGGCTAGAACCGCTACAATGGCTGGACACCGACAAGGA  
CAAGCGTCCGGTTCGTGTCCCGGTTTGAGATCAAAGGGTTAGAGCGGATTCATCCGT  
CTCCCCCTCTCTCCGCCAGTTTTATGATCCTGCAACGCGATTGCCTGGATCCAGGGCC  
ACGCCAGTGGCCACGTCTTATGGTGGCCCCGTCGGTCCCTCGCGAC

>CONTIG\_29\_length\_10765\_cov\_15.194021

CGCTTTCGGCTTCGCGCAGAAAGCCGATGACCTGCTCGTCAGTAAAACGTTTCTTCA  
CGTCCAATCTCCTCGGGGTAGGGAATTGGACTCCAAACTGAGGCGCTACTCAAAATT  
GGGTGGACGTCGGCCCGACGGCCGACGAACTGTGCGTCTTCGCTCGTCGCTGCCTTG  
CTCTCGATGGCGGCGGCCATGACTGTAAAAGCTCGCCAAAAGTGGCGGCGATCAGG  
ACTTGAGGCCCCGAGTGTGCGCACCGCTGCATCCAGGCGTTCGAGGTGGAGGCGCA  
GCTCAGCTCTGTCCATGGGCTCGAGTATCCGCAGTGCTGTCGCATCGGTTGAGACAC  
ACGGTCAGCCCCTCTTCAAATCGCCAGTTGACATGCCAGGGTGGGGCGCTCTGCTTC  
AACCAGCTTTCTAACGTCTTGGGAGGGCTTTCGCCATTCCGTTTCGTTCCATGGTTCA  
TATACAGGACTAGGCCGAAGGCATGCTGAGCCAACGGGCAAACCTCAGATACACGGC  
CCCTATCAGGGACTGAGAGATTAAGGTTCAACAGATAGGTGACGTAGGTGCTTATTG  
AGCATCCATCCAATGAAGAACCTTCCTTCCTCATCGACTGACTGCACGCGTCGCCAC  
TTCCCTGCCGCCTCCAGAAGCTTGGACTTCATCTCCCTTACCAATTGACCAGTTACGG  
GTCCTGACCAATGGTCGCGAATCGGCGCGCGTCCGACGGCCACTTCATAACTCTGTT  
CGAGCTGCTGTAGCGCGAGCGACGCGCGCATGACTTTGAGCGACTCAACGGAGCTT  
TGTTGATGCTCCAAACCTTGAGCCATCTCGGCTTGATGCTGTTGGCGAATAAGCGAC  
ACCAATTCCGCGTGGTCCTCGTCGTTGCCCTGCTCTGTGTAAAGGAAGCAGGCGAAC  
GGAAGCAATAAGGCATAGGCATTCCAGCGTTCGGAAGGAGTAACCCCAAGCCTTTG  
CAAGCGCTTGAGGAAAGAAAGAAGCCACGACACGATCCAAGCGCTGTCACTCTCTG  
CTGCAACGGCAACATCACTGGCCACAGCATCAGGTTGCTCGAGACTTTCGGCTTCCT  
CAACTTCCTCAAGCAAGCGACGGATGCCCTCCTGAACTCGCTCGCTAGTCAGCTCTT  
GGACCCAGGCCTGGAACGTAGGTGACTGCGCCACCTGATGGACCATGCTCAAGCGG  
TCTTGATCTCTTGCGCAACCAAAAGTGCAGGACCTTTGGCTACATTAACCTCTTCGCT  
GAAGTTCAATGGCCACATCGCCCACCATCGACAGCCGGCTCTGCCAGACCTGCGCGT  
TGCGGGCCAATTGTTGGATGCCGACGGACAAGACCTCGAACACGGGGGCCCATACC  
TCGGTGGCTTCCTGAAGCGCGGCTGCGCCAACCTGGGCAACACGGGCCAGCTCATA  
AGCCGGCCCCGTGGCCGCGAGGGCATCCACCGAGCGCAACCGGGAAGCGTGTTCCA  
AGGCGGTAGTAGCTTCCCAACGTCGTGTTACTGATCGTCGGGCCGAGTGATCCGCAG  
CGTGAGCTGCCTCAACGAGGGACTCGCTCCCCAGCCACAGGCGCGGTGTCTGCCGA  
TTCGAGCTCTTCTGCAACGCGACGACCAATCGATCTACAGCTGGCCGGTCTTGCCAA  
CTTGACATTGCCTCCGGTTCAACCAACGTCTTTTTGTCTCGCCATCAGGTTTCATTTT  
CAACGTTTCGTAGTCACAGCGCCGTTCTTTAAAGGTAAGTCCACATACTATTAACTA

ACGGTGCTGAGCGTGCTTGACGATGAAGTTGCCTATCGGCGTGCGCCCATCGACGAC  
GGGGAACCTTAAGCGGTTTGAAGGGGTGCTGTCCCAAGTGTGGCGCCGGAAGGCGG  
GCTCAACGCCCCCGAAGGCGTGACTGTCATTGAGAGGGGTGATGCGCGATCGGAT  
AGAGCTTTGGAAGCGCGTCTACGACACCGACGACAATGCCATATCCAAAGCGTTGT  
CGAAGCTTGCGTGGGACTTGACCGCGTTCACTTGCGTGGTGGAATGGTCCGGCAAG  
CGCCCGATGGCGAGGATGGCAAACAGCTCAACGGGATGGTGCTGGAGATGCTCGTC  
TCAGGCTTTTGGTGACGACCATGCAAGGCGTTCGGCGACTGGCCGACCAGGACCC  
CATCCATGGCCAATATGGGGTTTGTCTCATTGGTGGCCTGCTACTGGACGCGAAAGC  
GGTCCGGCAGCGCATCACCCGTCGGGTATTCGTCGAGGAAATCGCCAGCCTCGGCT  
ACAACACGCGGCCGTTGAAGAGCAGTATCGGCAGTTTCTGCGCGCCCAAGCACCA  
GGCCAAGCCCACTGGGTTCCTCGGGACTTACTACGAACCCTCGGCCCAACGGCA  
CGCCGTTTTGACTGTCTGAGCGGGACCACGCCCGGCACATCCACCCCCGATGATC  
TGATTCGAGAAGAGGTGTTTGACACGCTGGAGCGCCGCTAGCGCGCCTGGACGGC  
ATAGTGGAACACGTCAACGTGGAAATCGCTCACGCGGCCACCGAGTTCAGCCGCAC  
CGGTGAGCGCTCCAGCAGTGGAACCTGGACGACGCCAAAGGTGCCATCAAGGAGC  
TGGCCCAGATCGCGCAGCTGGTGGGCGAGTGGTTTTGCTTCAGCGGCATCGGCAGCG  
TTCTTCCCCACCCCCAGTTTGACCAGTTCGCACACTTGGACCAGCCCCTATTCAATGG  
GGACAGGCAGCAACTCCAAATAACGTGGGACGCTCTGGAGCAAGAAATCCGGCAAT  
GGCACGACGTGGACCCGCGGGCGCTTTAGCATGCTGGGCCTCATAGACGGCAACAA  
CTTCTACGTCAGCTGCGAGCGAGTGTCCCAACCCGCGGGCTATGTCCGCCCGGGCGA  
TTTGTTGCCCCAAGTGGACCACGCTCCAAAGCCTTGATGGACATCATGGACCGCGCG  
AACACCCCAGTTCGGTTCGCGGCTCAATGGCATTGCGTTCGTCGCAAGCGGGTGCGC  
GGGGGCGAGCAACGCAGGTAGGTGTGGGCCATGAACCAGACAGCGTTGTACCCGGC  
TTACACCACAAGGTGGGATCAGCTTGTCCGGGTGCGTTAGTGCCGGATACGATCGAG  
TCACTGGTCCAATGCAGGCACTGCGGGTCCGTCTAAACTCCCCCTTCAAAAACAGCC  
ACAAAGAGTTTGTATGACAAAATCTAGGAAGGATGAGCTCAACGAATGGCAGTGGC  
CACACCGCCCGACGAATGAGGTCGAGTTCGACACCATGATGACGTCCTCGACAGT  
CGACTCTCGGCGAAGGGCATCGAACCGCACCGTCGCGGGATGATGGCTTCCCTGCA  
GGTCTCCCGGACGTTGAAGTTGGATGGAACCTCCGATCCTTGGCGGGCCGACGGACCT  
GGGTCCGCCTTTCTCCCCACGTGATCTTCTTGCTCGTGTTACGCCTGGTATTCCGAT  
CACTACGGCGATGCTATGAAGGTCGACTTTTCACCTGGAACCTTTCTTGTGGTTGTCA  
ACGCCAACCTTTGGAGGATTCGCCTTCCGATGATCATGGGTGAAGGAGTGGTCGTGG  
TTGATCGAGATCTTTCAAAGGTCCAACAGAATACTGTCGGCAGAGGTCAAGCAATTC  
ACAACGCATTGTCTTCGGTAGAAGGTCTGACTCAACCAATGGCAAACAAGTTGACA  
GACCGAGAACTCGTCTTCTTCCATCGGGCCTTTATGCACGGATGGCAAGCCATCATG  
ACCTTTGATTCTCTCCGCGGCCATCCGCTCTTCGCCCATGCGAAAGCAGATTTAGG  
CACAGCGTCGAAGCCATCTCAAGCGGGCGAGAGTATGGGAAAGCTCGATGGGAGGC  
CGCCCAGTGCGCGGAAAAGTTACTGAAGGGCTTCCTAGCCCCGGGCTGGACAGGCAT  
ACCCGACGAACGCCGGGAAGGGTCACGATCACGTCCACCTTGGCAAACCTTGGAT  
GAAAAACTCGGAATCCACGTAGACGAGCGGATTCTGTCCACCCTCAAGACTTCACC

AGCTGTTTCGATACGGCGAAGAAGCCAGCTCTCTGAGCCAGGCGATGGATTTCGCATA  
GCGCTCTGTTGGCGCTGCTCAGAATTCTGGGTTTCGCATGATTCCGTTCAAAACGATC  
ACGCGGACACAGGGACGGAGAAGTAGCGTTGCAGATCATCTTGACCCAGCAGACGG  
CTTGTCGGTCAGTCACGTTGCCGTATTCAGATCTTCTTGGTATGAGAGACGCCCCACC  
GTCTTACAGTAGCGATACACCGCAGAGCTGCTCACTCCCAGCTCCAGGGCCAACTGG  
GCCCTGCTGAATGAAAGCGATCGAAACGTCAGGCCGATTTAAGGAATACAGCACGC  
TCACTGTCATGGATACAAGCAAAAGGAACTGCCCTCTATGAAATGCTCATGCGCATA  
CTTCTCTTCAAGACCGTAAGTCCGGATAAGCCATCTAGAGGAACCACCGGTATCCGC  
ACCAACTTCGCTACGACCATGGAGTGCACGCCTATTGTAACTATCAGCACATCTCC  
CGGCTTGAGCGGTATGCTCTTAGAATACCTTGACGCCGCCAATTTGAATTTCTCCAA  
GGCATTTTTGGCGTCTAGGTCCTTTTCTGGCGCAACAATTTTGCTATGGCTGAACCTT  
ACCCAATACCCGGCGTCGCTCGGCAAATGAATGACTGCGGCTTCACTCAAAGAGTG  
GCGGCGACCGAACACAGCAATCGTGCCTTTTTCGAAGCTATCTTGACACGTCACCAA  
ATATTTATGTTTCATCAACTCCTCAATGGTGGCTTCGTCCAGATCCTTTATAACACTT  
GCCAAAGGCATAATAGTGGTTGGTACAGAGTCTGGATTCCGTAGCGCTCCCAAGCA  
AACAACGTCCGGTGAAGGAGCAATATTTTCGTAGTTGGGATCTTCGTCACCCGGAA  
CGGGAAGCTCATAGCATCTGTATGACCACGCAGACCCTTTTGAGATTTCTCTGCGCT  
GTAACCATGCCCCGGGCATGCCCCACCAAGTTGACAAAAAGCGCCCCGTCATTCTCAG  
AACGATACGAGATTGTTGATTTCTGCAGGAGAGCATTTCAGACCTATGATGGTCATTT  
GAACCCGAGCTATGGACCAAGTCATTGGCACAGGCAACCAGTCTTGAGGGGTCTCG  
TTCAGGTCTCGCCGAGTTCAAAGATGTTCTTCAGAAGCACTACTCCATCAACTTCC  
AACTGACTTGCGAGCGCACCCGAAGCAGCAGTGATATCGGTTCTACCGGCCAGCAG  
CCCTAGCAATTTTCGACCCAACCTTGCCTTGGATCTTCGAAAACCTGAGTCAATACACTC  
AATTTTCAGAGCACATTTCTTCCACAGACTGGCGCATTGCCTGAACGAGATCTACTTC  
CATGTTTTCTCAGAGAAAAAGCTCCAACCTTGACGAACGTCAATTTGGTGATACAAA  
ATTGATACAGCCCTAACGCAGATGATGCCAGTGTCAGCTACCAGTCTTAGGAGTCAG  
GCCATGCCCTCCACGACAAAGCGTCAAGACAACCTCAACGAGCTACAGGATTTAGT  
CGAACGTACAGCTCACGAGCTTCGCTCCACTGCCGATTTTTTCGGCTCTGCGCATCT  
GCTTTTCAATGATACCAAGTCATATGTTTCGAACTTCATGCGACGCTTGATCGAGAGGA  
TATGGTCTTAGGTTCCGGCTACGACGCGCGAGAAGCCATGGTCAAAGCGGTGTGTA  
GGGTAGCTCCCGACTTGACATCTCACATGTCTACATACGTTTTTGGTAATGAGACGA  
AAAAGATTGTAGTTGGTAAGCCGAGAGGCCTTAAGACTATCGGCATATCAGCTCCCT  
CAGGCCTCTGGGATGCGATAGATTCTGTTTCGAACTCATGTGATAGCCGTCCGGTCAA  
AAACCATTCGAAGGTTGCTTACTGTTGGCATGGATCTCTTTGATCAGAGTCTTAAGG  
TTATGCATTCCAGCAAAGTCAAAGAGGCCTTTCAAGACGCGTTTTTCAGCTTATAGGG  
GCGATACGCGACAGGTCATGGCGCGCGTAGACGATACGATCTATTGCGAGGTTGCG  
GTCGCTGCAAATGAACATGGCCGCGCCTTATCCTCATTTTCAGCCGCTTGCTTAGCA  
ATGGCGCTGAAAAGTGAGTGCATCCCGCTGAGCGACGAAGAAGAAGCCTTTTCATT  
CGCTTATGAATGAGCTCGTGAGACCGTCGCGACTCAGGGCGAAAGGACAGAGGTCA  
GTCAGCGATGTGAAAGTGCAGCGCTGATCATCCAGGAAGCAGAAGGCTGATAACAA

GATCCCGATTACAAGACCGATAGCGCCAAGGCAAGATATTCTCCAGGACGGTGATT  
CGCGGGCTTGGTAGTGTGCTTAGCGATGCCAAGATGCTTTCCAGCCGGATCTCCGTA  
GCAAGCCCTGGTCGTCTTATCGAACAACCTATAGCTGCGTAATCGCTCGGATGACGCC  
AGGGCGTTGGGTGACTAAACCGGGTAACTGATCCACAAGATCAATGCGTCCCTACG  
CCGACGCTGGGCCGTGACGTGGCATCCAAATAAAGTTACTCCGCAGGACCAAGGGC  
GCACAGAAAATCATCCCATTGGGACAGCCACCATGGAAAACGCCGTTGACCAGCTG  
TAATCGTGAAGATTCGTCTTGGAATCACGTGGTAACCCGCCTTTTCGAGCTCCGCT  
GCCCAGGCGTCTGCGGGCTGCTCATGATTTGACGGAACAATGGACCGAAGTTGCCC  
CAGCAGCATGGGCGCAAGAAAGCCTCCGGCTACCAGCGCAGCGTTCTCGCCATACT  
CCGATGCAGCGCGCTCATAACGCTGAGCGAGCGACTTGTAATAGACCAAGCTTCCA  
GGCGTAAGGGCCGGAACATCAAACCTCAACAATGACAAGCCTCGCTACATGCCC  
CAAGGTTGCTAACGCCTGCTCACGCGCCTTCGTCTCGATCGATTGGAGAGCAAACGT  
GGATTGAGCCAAGTCCCAGCGATCTTCCGCACCAATACCCGCAACGAACCTTCTCCAT  
CGTCAGACGATGCCACGGGCAAAAGGCAGAGATGCAGTGAGGTTGCTCACAAACA  
CATCGTTGGGCTCAACAACGTCAAGCTGCGCAGGCGCATGCGCGCTGGAATTGATC  
GCAGGGATCAGCGCCATGCCGTCACCCGCACCGATGTCCAGCAACGCGCTTGCCG  
AACAGCGTTGTAAAGCTTGCCAGATCGGCGCTGACCGCTGCGTATAGCGCAAGGT  
TTCCCCACCACGAATGAACACCTCAAAGGCGCGCGGTTTCATCGTAGGCGTTGCGA  
GAGCCCCCTTGATTGAGGACATCGTTTAACGCGCGCCCCATGATGGATCCTTGCTGC  
GCAGCGCCCTCAAGAAGGCACCTCCCCCTGCCACGTCTTCGGAACCCAGGGCAGT  
CAACGCATCGGCAAGATCGTCACCAGGAACGACTCTACTCATACTTGTCCACCTTTC  
TTGCCTAGAGGAAGGCGTAGCTTAGGACAACAAAGGTAACCTGAGTCATGGGATTG  
GGACGGTGTAAGCACCCCGATCCCAGGAGTGGTAGCGCCAGGACACCACGTCATGA  
AATCTCCGTGGGCGCGTTGGCAAATCAGCCCTGTTGTGCAGCAAGTGTCTGGGCAAG  
TGCGTCGCGGGCTCGGCCGGCTACATCGGGACCGCTGTGCGCATCAAGCACTTCGAC  
GACCTGATGCATCTGCGACGCGGTCAGACCCACGCGTAGGCTAGCGGCCATGTGCG  
ACCGTAGTTGTGATTCGACGCCAGGCAGTGCAGAGAGCGCGCCGACGGTAGCCAGC  
TCACGACTTTGCCAGTCGAGGTTGTGCGGTTTGAAGATGTCACCGAACAGATGCGCC  
TGCAGGAAGTGGTTGATGACCGGCGCAAACCTCGAACAACGGCCCCGCCACCGGCGC  
GCCGGAGATCCGCGTCTGGTTGGCGGTGCCCGCTGCCAGTAGCGCATCGCCGGTG  
CGACAGGTTGGCTGGGCGCATTGCCCCGGCGCATCCTCGATGCCGCGCGCTTGCGGTG  
CCTCAAGCACCTTCATCAACGCGCCTAGCGCATTAAGACTGCGCGGGAAACCGGCG  
TAGGCGTAGAGCTGGACCAGGATTTTCGCGCGCGTCGCTGACAGTCAGACCGGAGTC  
GAGTCCCGCGTTCAGCGCAGCGTCGAGTCCAGGCGTGTGCGCCGACGGCTGCTGCTAC  
TGTGATCGGCGGAATCGCCTGCTGACGTGCGGACAGGGTGTTGGATGTCGAAGCGT  
CGGTGCGCATGGAGGATGCCTCAGTCGAGAGTGATGTGGCGATTGCAGCAGTGGCC  
GGCAGTGCGATCGGCAGCATGAGCGCGGATGCGGAGAACACGGGCGCGCACTCGCAC  
GAACCCAGATCGCGTCATCGTGACGCGGCCGGGGCCGACAGAGACTGCATGTCGAT  
GACGAACCGATAGCGCACGTGCGCGCGCTCCATTCGGTTCGAAGGCATCGTTGATCT  
GGTCCATCGCGATCATTTTCGCAGTCCGGCAGGATCTGCTTCTTGCGCAGAAATCGA

GCATCTCCTGAGTTTCGGCGATGCCGCCGATCGGCGAGCCCGCAACGCGGGCGCCGA  
CCCAGGATCAGCGGCACCGTGCTTTGCTCATCGAGTGGACCAATCTGGCCCACCAAC  
ACCAGCGTGCCATCGACATCGAGCAGCGGCACGTAGGGATCGAGTGCGTGCTTGAC  
GGGCACGGTGTTCGATGATCAGGTCTGAAGCTGGACTGCGCCTCGAGCATCGCATCGG  
GATCGGTTCGACAGCAGCAGGCGATCGGCGCCAAGTGCCAGCGCATCGGCTTCCTTA  
TCCGCAGAGCGACTCATGACCGTCACATCGGCGCCGAGACCCACCGCCAGCTTGAC  
CGCCATGTGTCCCAGTCCACCGAGGCGGATCACACCGACGCGGGCTACCCGCGCCAA  
CTTTCCATGTTCGCAGCGGCGAATAGGTGGTGATACCCGCGCACAGCAGCGGCGCG  
GTGTAAGCGAGGTCGAGTCCCTCGGGCACGCGCAGCACGAACTCTTCGCGCACGAC  
CAGATGCTTGAGTAACCGCCGAAGGTAATCTCACCAGTGATGCGGTCCGGACTGTT  
GTAGGTGCCGGTGTTGCCGACGCGGCAGAGTTGTTCCCTACCCCTACAGCACTGATC  
GCAGCTCTGGCAGCTGTCGACCATGCAGCCCACTGCAACGGCATCGCCACCTTGTC  
ACGCGTGACAGCGCTGCCGACTTCGATGACCCGGCCGACAATTTTCATGGCCCCGGCA  
CATTCGGATACTTGGTCCAGCCCCAGTCATTGCGGGCGGTGTGCAAATCGGAATGAC  
AGACGCCACTGTAGAGGATTTCCATTGCCACGTCGTTGGGACGGAGCGCGCGACGC  
TCGAATACATAGGGCGCGAGCGGCGCATCGCTGGACAGGGCGGGCGTAACCGATGGT  
GTGCATGTGGGGAACCTCGAACGAGTGTTGGGATGGCGCACTCTCGATCCGCAGAA  
GAGCGGCTGAGCGAACGGAATCCTGTGTGGATGTCCACTCTAGGATGCTGCCCCGA  
ATCGAGTAACCGGCTCTCGCCGCATGCGCTTATGCATCCGCCTCATCAATGCGTCGG  
AGCTATGGCGCTGTGCGTCGCTCACGTCGCAATCGCGCGACTCAGTCCGGTATCGTC  
GCAGCGAACAGCTGGGTGCTGACCAGCTCCGGATCGGGACCACCCCGTCGGCCATC  
GTGGATCGCGTCGATCCGGGCAACGACATCGGCCCCGAGTTTGAAATCGAAGATGG  
CGGAGTTCTCGATGATCCGTTTCGGGATTACCGACTTCGGGATCACCGAGGTCCCGT  
GCTCCAGGTGCCACCGCAGCACGATCTGCGCCGGTGTCGGGCGATGCTGGATCGCA  
AGCGCTACGACTGTTGGATGCGTCAGGATGTTGCGGGCGTCTTCATCTGCCGGCGCC  
GCGTATACGTTGACGCTCCGAGCGGCGACCAGGCTTGGGTACGATGCCGTGCTGT  
GCGTGGTAGTCACGCAGCGGCTGCTGGCTGAAGTAGGGATGCAGCTCGATCTGATTC  
ACTGCAGGCACGATGTCGGCGTGCGCTCGCAACTGTTTCGAGGTGCGCAGGGGCTGAA  
GTTGCACACGCCGATCGCTCGCACACGGCCTTCGGACAACAGACGCTCGGCTGCCC  
GCCAGGACGCGAGGGTGCCCTTCGAAATCCATTGGCACCGGCCAATGCAGCAGATAC  
ATGTCCAGATGGTCGAGGGCCAGCTTGCGCAGGCTGACATCGAAGGCGCGCAGCGT  
CTGGTCGTAACCGTAGTCGCTGATCCACAGCTTGGTGGTCACGAACAGCGCGTCGCG  
ATCGATCCCGCTACGCACGATGCCCTCACCGACTTCGCGTTCGTTACCGTAGGCGGC  
AGCTGTGTCGATCATCCGATAGCCATTACGTAGCGAGGTGCTACCGCGCCCAACCGT  
GTCGTGCGGGGCTGCTCTGGTAGACGCCGAGGCCCAACGCGGGCAGCTGGACACCGT  
TGTTGAGGGTCAAAGAGTGCGGGTGTCGGGACATGGAAGATCTCCTGGCGGATGGA  
ATGCGCGTATCGTCCTTGCTCAACGGTCGATCGCTGCTGTGAGTTCGGCGGACAGTG  
GGGCGCCGTCGACGTCCCCCACCCTGAGTAGTGGCTTGGTTTAGAGTCCGGGGGTA  
ATGATATCGGTGTTTGCCAGATGTTGGGCATACGCAGCCGGGGTCATGCCGCAGATT  
GCTTTTTTGGGTTCGGTCCTCGT

>CONTIG\_30\_length\_10682\_cov\_200.921743

CTCTTGGGACTCTATACGGGGGCGAGGGCGTCAGAGGTCGGCCAGTTGCTGGTCCG  
AGACGTGTTCCAGGAGGACGGCATTCCGTGCCTCCGTATCTCAGACGAAGGCGAAC  
ACCAAAAGGTGAAGACTGAGGTGAGCCTCAGGACGGTGCCACTGCATCCTGAGCTC  
CTCAAGATGGGCTTCTTGGATTGGGTCGATGGCAAGCGCATGGCAGGCCAGACGAG  
GCTATTTCCGGCCGCGAAGGCCACGGCAGTCAATGGGCAAGGCAACTGGATCACCA  
AAGCGTTTAGTAGGCATCTGGCCGAGGTGGCGAAGGGCTGGGAGCCTGCAAAGCGG  
GGCTTCCATTCGCTCAGGAAGACGTTTCATCCAGGAGCTGCAGGGTGCTGGCGTCGTG  
TCCGAGCTGCGCGCGCAGATTGTTGGGCATGAGCTCGATGATGAGCATCATTGACT  
TACAGTCGTGATTTACCGTTTCGGGAAAAGCTCAATGGCCTGGGGCCGCACTCTCCA  
GGTCTCGACTCACTGGGAATATGTCCTCACGTCGATCAGCAGCGGGTTCGATGTCAA  
AAGAGGGTTTTTAATGCGAAAGAATAGAGCGTTCCTAGTCTTTGAATCCGTCCTATT  
CGGAGTGATCGCATACAAGGCTTTCCAGGTGGTCAAAAAACTAAAGTCGACAGGTG  
AGACGGGCCTGGATGGGCGGAGTGGTGAAGCTGTTAAGCCTGAAATCAAACCAGAA  
TTCCATGCAGCTGAATCTGGTGTTTCGGTTGAAAAAGTGCGCGGGAACGGGTTTACG  
ATGTTTAGTGTTGCCCTTGGGGTCGTTGTCGCCATGATTGTTGGTGCCGCCTTCTACT  
TTAGCTTCCAGAAGCCCGTTGAGATACTCATAGACTACTTCGCTTACGTTTTTCCGAT  
ATTAGGAGGGGTCGTGGGAGGTATTGGTATCTACTTTGAAAGGGTGGGGTGGGTTG  
CCAGTGCCCAAGAACGTCTAAAGTAAACTCAATCTGTTATCAGGTTTCCATCCTCA  
TGCTCTTCATGGGGCTGGTGTCTTATTTGTCGATGAAGGTTGGTTTTTTTGGTGTCAT  
GTGGATCTTCTTCGGATTTGCTGGATCGGTTCGTGTGCTCTGTTTTGGTAATAGTCAAT  
AATAAAAAAATGGCCTACGGACCAACCGTCGCTGACAGAAGGTTTAGGCCAGTTGC  
ACATGCGTTGTTAGTGATTAGTTTTTGGCGTTTCAGCTATGTGGTTATATGCACTTTC  
ACGCAGAGTGTCGAAAAATTCAAAAATCTCGTTCCATCGATTTGGTCTAAGTTTTGA  
GGAGGAACGGGATGGCTGCGATGCTCATCATTACGCAGGTGGCGCAAAGTGCTAGA  
GTGAGCTTCTCGCTCAACGTAAAGTCGCGGTTTTTTTTTCTAGCTTCATTGTGCTTCA  
TAATGATCTCCTAATTTTTCTAACTCGTTATATCACTAGGTGAGTAGGTGTCAATCGT  
AGAGGCTGGAAGCTAGTCCTCGAAGTGCAAGCATTAGAAATGCCTACAGAAATGAG  
GAGGCCCCTAGCTAGGAGCCTTTTTATTTTCGTGAACGCGTTTATGCTCAGATCGGCT  
GCGCATACATAACGAACAGAAACATCGGCAGCCCGCTCAGGACAGCAAAGGCCCCCG  
AATGCGCCCATCAGAGTGAGGATGGTCATGGCCCACTGCCACCAGGCGAAGCC  
CTTGTCCCGCGCCTGAGCCACACGAGCATCGGCCGGGTAGAGGCGTCCTACCTTCCG  
TGTTCCCTCGCCGGGCCATGAGTGGCCCGACAATGAACCCGAACGGTCCCATGAAGA  
GCAGGGCACCCGAATACCACCAGAAGAACCGGTCTCTGGGGGGCATCAACTTGCGG  
CGGGTAGGAGAAGCTTGGTTCGAGAGGGGAGGCCGACTATAGGAACGAGGGCGG  
GTGCGTATGCCGGGCCCAAGTTTCCGGTGAAGCTGAATACGTCCATCTTGCAATTAGG  
CGCTGAAGGTCATATGATCAGCGGCATGAAGCACTTCTTTAGCCAGTTCACCATCGC  
CAAGCGCGGGCAAAGGACACCTTCTACGAGGTCAACCGTGATGGTGCCTCGTGC  
TTAACCGCGACGGAATTCTCAAATCTGGCCGAATGAACCGCCAGCTTGATGCTGCAC  
GTGACCTGCGTAACCTCACGGTTTCCGCCGACAAGGGCCGCTCCCGGAAATGACGA

GCCTAGCCCTGCTGGCCGTTCTATTGGCCGCGGGCTGGTATTTCTATCGGCAGTGGC  
GATACACGCGATTTGAAGCACTGCACCATCCTGGGCACCCGCAATATTTGCGGGGCTG  
CTCTCTGCTCGGTCTATCTGTTCCGGCATCAGTTCCGGGCTGCATGCGTTGGCGATGCG  
GTATTCCATCTACAGCTTATATCTAGGCAAGCTCCAAGGGATGTTGCCCCCTTCAGAT  
GAGCGATAAGCAGTCGGCCGAAGGGTTGACCCTGCATCTGGCGATCACCTCTGGT  
GTCTACTCCTTGGGGCCGCGCTTCCAATCCTGCTCAATGATCCCTTGGTGCGAGTCC  
GCTCGCTCGCCAGTTGATTGCCTCACGCCATGGCGCTATCGACGCCATTGAGAGCC  
TTGCCATCAAGTGCGAAGAGGATGGCACGTTGGTTGCGTTGACCTTAGACAACGGC  
AAGGTTTACGTTGGGCTTTTGGATGAGTTCGCCGGACCGAGAGTGGGGAAAGAGTG  
GGTGGGCATGACCCCCGTCGCGTCAGGCTACCGGGACGAAAAAGGGCAGCTGGTCT  
TGACGACCTATTACGACATCAAGCTGCCGGATGACGCGACTATTGAGATATTCCAGG  
TCATTGTCTCGATGAAGCAAATCATCTCCGCGCAGGCGTTCGATCTGGAGCTCTACA  
AACAGTTCAGCAGCCTGAAGCTCACACTCAAACCGTGGCGAACAGGAAGGAGCTT  
ACTCCTCAGCGTTCTTCCTTGGCGGTGGACAATAACCGGCACGCCTTCTATCTGGGA  
CTGCCCATCCTCCTGCTTTTTTCGCCTTACGTTGGATTGAAGTCCACCATCGGTGGAC  
TGAGCATGGTCATTGCGGCAGGTCTGTCCTCCCTAGCGGCTGAAAGGCTACGACGAC  
GACAGGAGAAGCCTGGAGCGGACTCCACTCTCCTCAACAGTGATGAAGTGCATTTC  
GTTTAGTCAGCGTAGGATCGAGCCTCGTCGACGCGTGGAATGGCATAACGAAAAACG  
AGGCTTCAGCGCCGCCAAGCGATACATCACACGATGTTATTCGGCTAGCTCCGCAAG  
CCATTTGGAAATGAGCTGGTGAGAGGCACTGTCCGGATCCCTCAAGATGGAGATGG  
TGTCTGTCATGGTGGTCTTCTCCCACTTTGGAGGGTGGGTGACAAGATCCGCGTAGT  
AGCCCATCACTTCGACTTTTCGGAAGTGGCGGAACCACACGCCCAGTTCAGCTTCCG  
GAGCTCTGATGTAGTTGTATGGCCCGGTGACCCGGGCCAATGCGCAGGGATAATGG  
TGGGCGACCACCAAGATGATGTCACCTACATCCATGCAGTGCGCGAAATCCCAGTA  
GTCTCGCTGGCTCTGGTCGATGTCTTGTTGCTTCACATCCGTTAGATCGCCAGGCGGA  
TCCGCGAAATCCAATCCTACATACCCAGACCAAGTGACCGGGTGGTGTGGCGCAC  
TGCTCGTGCGCTGTCCGAAGGATGCAGCTGCATGCGCCAAAACGTCATACAAATCCT  
TTTCAAGAGTTTGGGGAGGAGGGGGTATCGTCAGCCTTCCCAATCTTACTTAGGCTC  
CCCCTCGACGCGAGACAACTCCTGGGACAGTTGGTGACCTGCGGGCGTCGCGGATG  
GTATTGCATGCCTGACGATGCGTATCAATCAAGGCTGGGGAATCATCAGCTTTGAAT  
ACAGGACCATCAGAAACATCGGCAGTCCACTCAGCACGGCGAAGGCCCCGAGAGCG  
CCCATCAGGGTCAGCAGTGTCATGACCCACCACTGCCACCATGAGAAACCCGAGTC  
CCTCGCCTGGGCCTCGCGGGCCTCTGCAGGGTAGAGCCGAGCCGCCTTCTGGCTTGC  
GCGTCGGGCCAAGAGCGGGCCAGCGACGAACCCAAAAGGTCCCAGGAGAAGCAAC  
GCTCCCGAATACCACCAGAAGAACCGGTCCCGTGGGGTCATGAGCTTGCGCCGGGC  
GGGCACCGGCTGGTCAAGCAGAGGAGGCGCGCTCATTTGGCGTAGGCCCTCCAGGT  
TCCGTCCGCTCTGGCGTAGCGCAAGTTCTTGTTGACCGGCACGGGAACCTGTCGACC  
AGCGATTTCCAGAACCACGCGACCGCGGGTGTACACCGGTATCCCTCGGTGCCTTC  
CGCTTCCACGCAGCCCGAAAGCTCGAAGTTTTGAATGTCGGTGACTTGCCGGGCGCC  
GCTCTGCTGGAGCAGGGTAACCAGCGCCTGCTTGGCGTTGTCGTTTCGACGGCTTGCC

GCTGCAGGCGGTCAGGCCAGGGCCATGGTCAACGCGACCGGGCCAATCCATGCGT  
TTTTTCATGTCGTTCCTTTTTGCTGGGGAATAGTGATGGGGAAGCCGGACCAAGCCGG  
GACCTGCTACTTGTGCGGTTCCCGTCGGGCTTGAACCCGGCAATCCACATCCGGCT  
GTCCTTGAACGGGACCAGCATCCCCGACGCGCCCGGATGCAGATCTGCGGTCTGGA  
GGAACCTCGAGACCCACGCCACGCGCAGCGACACGTCCACGGCGCGGTTCAGCAACT  
CCTGGCCGGCTGACTTTGACGACAAAGGGCTGGGCGGAGGGTTGGGGCCCGTGGA  
GCGCTGTGCGCCCGTGTTGGGCTTGCTGGAAGGCACGCGGACGCCGTTGAGGGTATC  
CCTGCCTTTCCACAGAGCGGAGGTGTTGAGCTCCGCGGTCTCGCCCAAGTCATCGGT  
CTCCGTCACGGCTGCATCGAAACAGGTGCGAAACGTCTCGGCGCTCGAGGCAGTCG  
GGCTGGTCCAGATGCGCGCTTCCACCGTCCAGCAGGGCAGGGAGGCGCCCCATTTCG  
GTGAAGGTCAACGCGACTCGGGGCCAGTCCAAGCGTCCGGCCTGGGCAGCCTGGTG  
GTTGTGCGCTTCGAAGAGGTTGGGCAGCTTCCCGGCGCCATTGATAGGCATGTAGAT  
CGAGCCCGCCTCCTGGCTGTGCGCCTTGGTGCCGGCGTTTCGGCTTGATGCCACCAT  
CTGCTTACCCGAGTCGGACAGGCTCTTCCCGAGCTGGCGGAAGAAACCGGGCTTCTG  
CGCCGGTGTGTCGTGGGCATGAGTGGTGAGCGGCGCGCCAAGCGCCAACGCTAAGA  
GCGCAGCGAACGCTCCTTGTCCTGTGTGCTTCATACGGAAAGCCCCTGTAGACCGCC  
GGCCTGGCGGCATTTACGATAATCGCAGATGAGAAGCCCGCTTCCAAGCGGCACAC  
TGGGGGAATTCAGCTTTCGTGCAATCTTCTAGATGCCCAAACCCAAAACACCGGTCA  
CGGTCTATGGCACGCGTCTGCGCCATGCGCGGATGGTCATGGGCTGGACCCAAGCC  
GAATTGGCGGAGCGCATCGGGATGGTGGACTCGGTGTCCGGAGCTACGCGCGTGAG  
CCGTTACGAGACGGGGCAACATGACCCGGACCCGGCAACCTCCGAGGCCTTGCGAA  
AAGCGCTGGGGCTGCCAGTGGCGTATTTCTATGCCACGCCAGATATGCTCGCTGAAA  
TTATTCTCCTGGTGTGCAAGCTTCTGCGTCCAAGCAAAAAGAGTTGCTTGAGCGAC  
TGCGGGAACTAAGCGCCCAATAAAGTAAGGAAAAATCGATGGGGGTGCGCTCCTTA  
AGAACTCTCCGTTATTCTCGTCGCTGGAGACACCCGCATCGTTTGCCAAATAGAT  
GCTCCCCTCCTCACTCGCGGCAGGCCCCCTTTCGCATGTTCAAGAAGCCGATGACCAT  
CTACGGTAAAGACAGCGGCATTGCCGCCACAGTTGTGAGAGTAAGCAATTTTCGTTT  
ACTCGCAAACATTGAAGTCGAGCTTGAGGATCTAACAGTCCTTATTGGTGCGAATAA  
TTCGGGAAAGACGAGCTTTTATAGACGCGATGTTTCGCCGCCGTCGGTGCAGGTCGTAA  
GACACTGAGCGCTGATGACGTGCGGCTGGAGCTACACGAAGCAGTTGCACCTAAAA  
GTCGAGATGTCGTGATCGATGTTCTGCTTAGGCCTGTAGATGATAGCGGGAAGCTAC  
TTGACCAGTATCCGGCGGGGAAGTTTTTGGAAGTGCCTATGGGGCACGGGCGGAATC  
GCCACCGACGCTGACTTCAATGAGTTCACCCCAATTCGCACGAAGCTAAAGTGGAG  
CGACATTAGGGGTGAATATGTCATGGAGCGCCGATTCTCAAGGAGTGGCGCGGGC  
TTTCAGACTGGCTTATAGCAGCAGTGCACGACAGGCCTATCACTGCCGCACAGATGG  
AACCTCTGGCCCTTCACTACGTCGATGCCAAGCGTGACTTAGACGAGGATCTTAGAA  
GGCAAGGTTCTTTCTGGCGGCGATTGACTGAAGATCTTGGTCTGAGCGCAGCTGATA  
TAGCGGCGATGGAGATGACTCTTTCTGGGATCAATCAGGAGATTGTCAATAAAAGC  
GAGATTCTGAAGCACCTCAAAGAGAACCTCTCTGGTCTACAGAGTGTTGTGTCCGCG  
GATAGCGGCGGAGTTGAGATTTTCGCCTGTGCGCGGAAAGCTTCGCGATCTATCGAAG

GGCGTGGATGTCTCATTTGGCACGAGTGGTGCTCAGTCATTTCCCTTTGTCACGCCATG  
GCATGGGAACGCGAAGTCTTGCGTCTCTGCTTGTCTTCCGAGCGTATGCTTCTTGGC  
GCCACAAGAAGGCTGTGAGCGGCGGAGATCGCATCCACTCGATCTTGGGCTTAGAG  
GAGCCAGAGTCGCACCTCCATCCTCAGGGCGCAACGGTCTCTCTTTGGTCACATAAAG  
CAGATCGCGGGACAAAGGATTGTAAGCACGCACTCTCCCTATCTTGCAGGTCAGGCT  
CGGCTCGAGGAACCTCCGGCTTTTCATTAAAAAGAGTGGGGAAACCGTCGTCACCAA  
GATCGATGTTGCTGCTCTGAAGGATGCGAATGACGTCCGGAAGCTGCAGGAAACCG  
TGATCGATACGCGCGGCGATATTCTTTTCTCTCGGGCGGTTGTTTTGTTTGAAGGGCA  
AACCGAAGAGCAGGCGCTACCCATTTGGGCGCAAGAATATTGGGGAACTTCAATCC  
ATGAGCTTGGGTTCTGTTTTGTCCGCACCAATGGCACTGACTATTTCCCATTCTATCTG  
GCTTGCTAAGGCGCTGGGCATCCCCTGGTATGTATTTGCTGACGGGGAGTCGCAGCC  
AGTCAAGGAATTGGATTCTGCTCTGAAGAAGGCTGGGGAGGTTGAATCCTCTAAAC  
ATCCCAGCGTTGTAGTTCATCCAGCAGGGAAGAACTTTGAGTCCCAGTTAGTAGCAG  
AGGGCTACCTCAGTGAGATTGAGCTGGCACTTGATGCTATGAGTGGAGTCAAGGGC  
TATCTGGATGAATACATCAAAGATAAGCATGGACAAAAAGCAAAAGGTGGAGTGCT  
TCGCGATTATGTGTGCGCCAGGTGCGCGCGAGCGCGCCGCTTTTGATGCCCTGTCCGG  
CGCCAAGACCAGTGTCTCAAAGCATTTAGGGCACGTCATTACCGCTCACAAGAATCC  
TGATCGTCGTTTCCCTTCTATCATCACGAAGATCTTTGAAGTTGTGAGTGCGACACAT  
GAGCTGAAGAAGGCGGAGCCATCATTATGAATAACAGTAGCCATTTCAAAGCCAGG  
CTCTCATCCGAGCAGCTCGAAATCGTTGAGCATGTGGATGGTCCGCTTCTAGTGGTG  
GCTGGACCCGGGTCGGGCAAGACCAGGGTTCTAACAGAGCGAATCAGAAATCTGCT  
GACTAATGTTGATGGGCACCTCCGGATTCTGGCACTTACCTTCACTAACAAAGCTGC  
TGACGAGATGAAGGAGCGTTTGCAGGATCTCGGATCTGAACGAGACCGCGCTTTCA  
TTGGCACTCTTCACGGATTCTGTTTGGAGGTTCTCACCGAGCGCGGGAAGCTCGTTG  
GTGTTGATGATCCCCCAATATCTTTGAGCAAACAAAAGACAGAAGGGATGTTCTGC  
TTCGCGCTATTGATGAGGATCCTGTTCTTCAAGCGGCTATCCAGGACCTTGCTGAAT  
CCAAGGAAAGGGGCAAGAAGGTTGATCAGTGGTTGAGCTGGATTTCTTATGTGAAG  
TCCCATCCAATTACCTGCGCAGTGATTGATGATGAGTTTGCAAAGAGGGTTTTTGAC  
GCCTACGAAGCTGGCATGCGAGCCAGTAATGCATATGACTTTGACGATCTACTTTTG  
CTGGTTTACAGGCTGATGGTAGAAAACATAAAGCTGGCGGAGATTTATAGGAAGCT  
TTATAGATTCGTGTGCATCGACGAGGCTCAAGACATGAACGAGGCGCAGTATGCCG  
TAATCTGTGCTTTGTGTTTCGGACGGTTTTTCGAAGCTTGATGATGGTTGGGGACCCTCG  
TCAGTCAATTTATGGATTCAATACTTCTGGCCCTGAATACATGGAGCGTTTTTGGGCG  
CGATTTCAAAGCGAAAAGAGTGCACCTGACAGCTAACTATCGCTCTTCCAGAGCTGT  
GGTCCGGCTTGCGCAACAGCTTGATCCCAATTATATGGTTGCCATGCAGCTTCCCAT  
AGAGGGAAGAGCCACCGTCCTCGTTGGAGACGACGAGCAGGATGAGGCGCGCTTGA  
TTGCTAATGAGCTTGAAAGGCTTTTTTCAGCAAGGCGATCGCGATGTTGAAGGTGGTG  
TCGATCCATCTAAATGCGCGATCTTGGGTCTGAACCAGGTTTCGCTCTTTTGGCGATTG  
AGGCTGAGCTCAAGGGCCGAGGAATAGCTCACTACAAGCGCCTGTCCGCCAACAC  
GAGAATGAATCAGAGTTGGTCGAGGATTTTCAACTGGGGTTACGTTTGTGTTGGCCAAC

CCAAAGGATCGATTGCATGCATCGGCTCTTGCAAAACGATGGGGTTTCGGCGACTGCT  
CCATCGGCGGAGGGAGGAGCCATCGAGGCTGTAAAGTTAATGGCCAATGCTTCATCT  
AAGCCGATCTCGCATGCTGTGGTTGAATCACTTTCCCTGATCACGGCGAACTCGGCG  
CGCTTGATCTTATGCCCCGATTGAAACGGCTTGAGCAGCATGCGGATGGGCTTGAT  
GAGGGCGGAAGACAGGCAGTTTACGAAGATGTCGCCGTCTTTAGGCAGGAGTGGGA  
TCAATATCTGCGGACGAGTAGCGGGCCGAATGTTCTGAGTAGTTTTCTCAGCAGCAA  
GGCGCTTGCGGTTACGCAGAAGTCAGTGAGAGAAGGCGTCGCACTGCTGACTGTGC  
ATTCGGCAAAGGGATTGGAGTTCGATGTCGTATTTCTAGCGGGAATGGCGGAGGGA  
ATGTTCCCTGACTGGCGGGCATCGCAGCTCAAAGAAGCGGCTGAAGAAGTTCGAAA  
TGC GTTTGTTGCCGTTACTCGTTCTAAGCGAGTTTTGTATTTGAGCTATCCGGCGACA  
AGAATGATGCCATGGGGAGACAAAAAGCGGCAGACACGTTCCAGGTTTCTGGCTAG  
CCTTCAATGAGTAGAGTGCTGCGCAGGCGAGTCGGGGCGAGGGGGGGCGTCCGGAA  
TTCGGCAAACACTCAGGGCCTCATTGCGAGTGGCGCATCGCCAACCAATGACCTGCC  
TAGGAGAGGTTGCTGACTGGCGGTAGAAGGAAAGTGATAGTGGGCACGCTGATGAT  
GCTCATGGTGGAACCTCTAAAATGGGAAGGCAGAATTGGGAGAAGAGAGGGGACACG  
GGTGCGCGAGCTGGACGAGTGGTTCGTTGCTCACCCGTCTCGGATCACGGGTAGAAC  
TTGCTCGGATCAGCCAAGCATTGTGCGAACTGCCCCCGCTGGTAGCGCGGCAGCTCC  
ACGTTGGGCTGATACAGCTCCAGTGCGCTGATTTGCTTGCTTCGCGTCACCTGCGGTT  
TCTTGTGCAGGTAGTGCTGGCGCAAGACCTGGACCCGGTCGCGGGGATCGGTGCTGT  
GGCCCGTGACCAGGGCAATCTCCTTCTCCGGAACGTCGTTGACGTCAAGCTCGGTGG  
CCAGCGTATGGCGGAAGGCATGGAACCCGACACCCTTGGGGAAGCCGAGGCTTTTC  
AGGTAGCGGCCGAAATCGACCACAACTGCTGGCTGTAACGTGCGTTGGTTTCCCCG  
GTGGTGCGGTTTACCCCAGCAGAGAGCAGCGGGAACAGCCGAGGGTGGCCCGTCTC  
CTTCATGTCTTCCACGAACTCGAGGAAGCCTGCTTCCAATAACGGCTTGGCAATGGG  
GATGATGCGCATGCACCCCGCGCCTTTCATGCTTTGCCGGCTGCGCCGCCGTCGCTT  
CGGGTCCGCGGCCAAGTCCTGGTCCAACGTTTTTCTGGAAAGCGATGCACCACACCCC  
GCGTTCCTCGATGATGTCGGTCAGCTTCAGCTGGCAGACTTCGTTGACCCTGGCTCC  
GGTGTAGAGGCCGATCATCGGTGCCACCAATACTGCGGTTTCTTGGCCCAAGGAAT  
GAATGTCGCGGGGTCAAAAATGGCTTGCAGGTCTGCGTCCTCGAACAGGCGGATCG  
CCTTGTCGGGATCGATGGTGTTGTCCTTCTTG

>CONTIG\_31\_length\_10047\_cov\_12.883468

TTCCGCCACACACTGGCCACCGAGCTTACCACAAGAACGTTTCCGACCAGGACATC  
GCCCTCATCACCGGCCACTCGCTGCGGAAGAACGTCCCCGTCTTGACACGACGCGTAT  
TTCCACAAAAAGCCCAAGCTCGCTAGGGCCACGCAGATCAGGATCCTGGCGAAATA  
CAAGCCGCCGGTCGAGTTGCCCAAGTATGAGCGTGGGCAGTTCGAGGAGAGCTTGG  
CAGACCCGAGTAAGTTCTATCCATAACACCAAACAGCAGCGGCCAGTCGCCCCAA  
CCTCAGTGCGAGTAGGGGCGGCAGCGAAAAAACGACGGAAGCTTGCTACTGAACATA  
GGTCTCGCCCCCAATAACCAGCCGACGAACTGCATCCTCGCTGTCATACCAGTCGAT  
CGACAACCTGATCGAATACTTCTTTCAACAACCTTCGGCATATTTCTAGCAGACCAT

CGAATGTGCAGGCATCCCTTGGGCTCGATCTCCCCTTGAGGCAGGCAAAGGATGATG  
GGAACCTCGACTTCACGCATTTGATGTGCGGAAGTCACCGCAACTTCCTTCTGCAGAC  
TTGCAAAAAATCGCATCTTCATCGTAATCCCAGTAGAAGCCTTGCGGATCGCGAGGG  
GAAGGATGAGTCTGAAAATGCCTGTGAAGGCCACTGAGATCAGGAAGGCTCTGCCG  
CATATAACCATTCGCTTCCCGAGTAACGCTCCAGCTTTGGCGGAGCTGGTGGAATGAA  
CCGAACATCAGAAGGATACCATTTCTCCTTCACATTATGATTGACCAGCATCATCGT  
CCCTTCCACACGGACCTCCAAAGTCAGCCCATCGGCAGGAGCCCCGCCTGTGTTGCT  
CACAGCAAGCTTCAACTCAAACAATCCTTGATCAAGATTAAGTCCGGCGGGCAGCC  
TTTCAATCCTGTGCGGAATATTTTCGCGCCACTCCCGTCTGGCTTGCTGATACGCCAA  
CTGACCCCTCTGCCGCGTTATGGTGAACGGCCCCGGACTTGCGTCATTCTCTTCAGG  
AAATCGGTTCTCGATGGTATCGGTGGCGTCATCCAGGAACCTCTTCAGATAAAGCACG  
GTATCGGCAGAACAAATCCTTCGATGCAGTCGATTGCCTTGTCATCTTGAAGAAGTTG  
GACCTCCACTTGAGGGAAGCGGTTGTTCAACGCTTTTAGATCATCCTTCAGCCTCGC  
GATTTCCCTTATCTCGCTCATCCTTCTCAGGTTCAAGAAGCCAAGACTCAGGAATTTTT  
TCGCAGGGCAGTTCAACGGATTTGGCGATCCTTCTTGGAACCGGTCATGAGTCAGG  
AACACCACATCCCCAAGAGCCTGTTGCAGAGCAAAGGATTGCTCCACGATCCTTCCA  
TCTGCCGTTGATAGGTCCAAGCCCGCTGGCTTGACACGATTGGAATCGAAGAAAGG  
AGCAAGCAGCCACACGACCTGCGGACCACCTTCTTTGACTACCAGTTCATCGATATT  
GCCATCAATGAGCAGATCAAGCTTTCCGAAGATACCGCGAGCCCGTCTGGCTGCCC  
GACTGTTCCCATTTGGACTTGTGGCGATCTAGCTCGCCCATTACTTCGTCCAATAAGTA  
GAGCTCGACTCTAGTAGCCTTGGTTAGCTCTCCCCAAGGCAACGTTTCTGCCGCCTT  
CACTTGAGGAAGAAGTTGGTATCCAATGCATATCGCTGAATTGAGGCCATGGCCA  
ATTCTGCCCTTTAACCAGCCACGCTTTCCAGCTAATGCTTCGGCCTACCTTAGGCACC  
CAACCTGGAGTCGCATCCCATCACGCCGACGGAACCGCAGAGCGATCCCATGCCCCG  
CCGCGCCCAGCCAACGATGAGTGTGGGCATCACGATGACAGGTAGTCCCCACAGAA  
ACGCGATGTAGAAGGCAGCGGTAGCGAATTCACCGTAGACCCGATGTTCCGCGAAC  
TTCCAGCCAAGCACCGCGCAACCGAAGACCGCTGCAAGCCCCAACCCGCCGCCAC  
GAGCGCCCCTTTCAGGAACCCGCCTTTGCGAAAGTAGGGAATGCGGCCGGTCTCTGA  
CATGCCAAGCCCAGACCTGCTGGGCGCGGATGTGCAGCATCAGGCAGAACACCAGG  
AAGCCGACGATCAGCAGCCCGCCTGCGCAGTAGACCAAGCCCATCAGCTGTTGGGT  
CTTGAAGACAGCGTCGAGGCCTGCTCCAAACAACAGCATGCCCAACGGCCCGAGGA  
TGACGCAGGGCAGGATCATGGCAGCAGGCCCGGTGCGCGCATAAAGCCGCTGGTAG  
TTCGCTTGGTGGTTCAATTTCTTTTTCTCTGTTAGGAGCAAACCAAACGGCGTCACGGC  
AACCGCATGGAAACTGGTTAGTCGAGGGTCAGCCCGCTGACGTTCCGTTATCGGTGCG  
CGTCGACCAGCTCCCATCCTTCGCCCGCCGGCCGGAACCTTCATCGTCATCTTTAGGC  
GCATTTCCCTTGGCCTTCGGCGTCGTTGGCTGCCCGCCAATGAAGCCCAGTCCATCGA  
CGGTCCCGGAGACCCGGCAGTCCTGATCACCGTTGGGCAGTTTTTGTGCAGGCGATCT  
CCAGCCCGCTCGCTTCCTTGACTTCGAACCGCCAAGTCCGCTGAAGCGTTGCCTGCC  
TCCCCTGCTCAGTAAAGAATCGCTCTACTGCTTTGACCGCGTCCTCCTTGTTCCGGCGC  
ATGCTCTGCACCACAGGCCGACAAGCCCAACGCCAAGAAGCACGCTGAAATCCAAA

CACGTTGAATGGTCCGCATCACGACTCTCCCTTCTTCTGTTTGGTCAGGTCCACGCCG  
ATGACCTCGTTTCGGTAACCCACCTGGACGCGTTCTACGTCCACCTCGGCGCGCGGG  
CCTCCGTTCTCCAACCAGACCCGCTTGACGGTGAAGACCACCAGATCGTCCCTGGCG  
TCCCTGCCCTGCTTGAACAATCCGGTTGCCTCGGTTTCGCTCATGCGGATTGGAAGA  
TGGAAGTGCCCGGCATGCTGGGGTGTCCAAACAGATCGCTCACTGCGAGCACTGGT  
CGGGACAAACCCCTCGCCCGTGATGCCCTCCACCTGAAATCCGGTGACCCACGGAA  
TCGGCACGTAGATATCAAAGATGCCGCGCTGCCGGTCATAAGACGGCTGATCCACA  
ATGTTGGGGCGAACAGCAAAACGCTGGATGCCGCGGAAGCGTTCGGCTCGCGCATC  
GAAAGCAGCGCCATACTTGCGCTCAATAGCTTCCGGCTCCTGAGGGGTGATGCCATT  
CGGGCCGTTCCGCTTCGTATCGATCAGCCACTCGCCATACAAACACCTCTCGCGCTC  
GGTCTTGCTCAACCGGTAGCTGGACCGCGTCGACGCAATCAGCCTCGCATCACAGGT  
GTGGTAGCCCGCCGAGGCCGTGGACGCCAACCAGCGCGGATGTGTTGCGCGCCGG  
CCAGTTCGTCCTGGTCGAGGTCCCAGTAGGTCCCTTGCGGATCGAGATACGGGCTCT  
TGCCTCTGTCCGTCGATGCCTGCGGAGCCCCGGTGATGGCCCGCCCAATCTGCTGAA  
GAAGATTTCCCCTGTCCTGCGCTTGACCCGCCATGCTTGCTGCCAGGACGCACGCGC  
CCGTGACTGCAGCCCACTGCTTCTTCATGCCCTGCTCCTTGCGTCGGGTTGCGACGA  
ACTTACGTGTCACGTAGAGTCTACCCGTGGCGTAAGGCTTCCGTCATGCTCTTTCCAT  
GCCTGCACTGCATCGATTACAGCCTGTGAAGCCCGCCACTCCCGCCCCCTCGGGAGATC  
GTGGCCGCGCGCCTGCGCCAAGCCCGCGAACGACGCGGGCCTGAGTCAGCGCGAGGT  
AGGGATGCGAATGGGCCTGGACAAAGACACAGCGTCAGCGCGGATATCCAGATATG  
AATCCGGAGCCATGTCTATCAGCCTCGAGGCTTTGTTTCGAGATGGCAAAAGCGCTGG  
AAGTGCCACCTGCTTTCTTGCTGGCTAGCACCCCTGGCATGGCCGACGCGATCTTGG  
CGTTGGGAGAGCAAAGCGATCGACAGCAGGACCAACTGGCGAAGGTCCTAGCGAC  
ACTGACGAATCTTCAACCCAAGGTTTCGAGATCAGCTAATCGCAGAGTTGTTGGATAG  
GAGGTAGGCGGTTCAACCCTCGACTTGAACGACCTTTGCTGCAACCGAAGATGCCG  
CCCTTACACATCAGCAGCAGGTGCCACGTGGCCTCAGGGTCGCCTGGGCAAGGTGG  
AGTAAGGAGCCCGCCGCACCTTTGAATACCTCAGCGGTAGAGCGAAAATGGGGACA  
CTTCGAACGGACGCAAACCGATGAATCCTGCCACCCCATCGTTGGCCCAAATCCATT  
GGCCTGACCATAGTGTGCTGTCTACGCAGGCTTGGATCTTCACGCCTTCGCCATGTT  
TCGGGACGAGGTGGTGGTTCCTTCACTCAATACCTTAGAGAGACGGATCGAGCAGA  
TGGAGGAAAGCGGCGACATTGCGGAAAGCACATTTCGGAGCGGATGTCTACGCAGAT  
CTACTTCACAACACGGTAGAGGGTTTCTTGCTTACTACGCAGTCCATGCATGAGCGA  
AGCCTTCGCGGCCTTATGATCGCTATGGCAAGACGCAAGAAGTGGACTGCTGATGA  
CCAGAACAAAATCAAAGTAGCCGACTGGTCTAAGGGCAGCAGGGGAGTGCCCGCGT  
TGTTTCAAGGCCTGTTTGACACCCCAATTCAATCGTTCGGCGATCAAACGGATCTGC  
GTGTGCTGCGGCTGTTTGGCAACATCTTGAGACATGGGGACGGCCCATCGGCCGAG  
GAGCTTCACGAGCTATGCCCTTCGCTCTGGTCTCACTGGCTGCCTCCAGGAACTGTC  
TTGAAAGTCGCTGGAGGTCAACTTTGCGTCCGCAAAGACGCCTTGCCCCACCCTCTG  
TTCGAGAACATCACGCTGCCAAGAAGCCTTCTAGACCAAATGATTTTCGGCAGTAGTA  
GGCTTTTGGGAAGACATAGAGTTCGTCCGGTGCAACTCTTTCACGAACACGAATAGT

CGGATTCAAGCGCACCTTGCCGAGCTGACTCGGAAGCATGAAAGCCGGTCCGCGAA  
TCGCGCTTGGAACCCAGGATGAGGCCATGCCACGTCAGGGTAGCCTTTTTCAATTGC  
CTCCCCAGCCGGCTGAGTAGATGAAGCTTAAACAATCGCCACGGAGCTATCGCTGA  
CAGCCATCAATCTCACTCTTTCGGAAGCACTTTTAGCTCATAGCTATTCTGAGCGGC  
AACATAAAGTGCCACGACCTTCGAAACGGTTCTTCTCTTGCGTTCTCGCTGAGCAT  
CTCTTCTGGGGGTCCTTATGGCTTCATCGTCGGGCCGCTGATGGCTAGATGGGGTCTT  
CGCAAAGCCGAGCGGCTCCACCCGAGGAGGCCTATGCGGCGCGACCGCGGGTTTA  
CCGCTGCCCAGTGGTGGGTCATGACGCCGCTGACAGTGATGGGAGCTTTTTGGGTCA  
CCTCGGTGCTCAGCGGACTCCCCATGGTGTGCTGGTGTGTTGTGGTTGCAACTGACAA  
ACTGATTACGTAGGGCCTTCTCGCAACGTGCACGGAGTCCTTGTCTATCCATCTACG  
TTTATTTACTCAAGACCAAGGTGCCCGCCGCTGCATCAAGTCTCCTCGCAAAAAATA  
ATGCGCCGCGTCGGCGAGGATACTTAAATCTAGGCCCTGTCTAAAATCTTACTAGC  
CAACTTTGAAAGCCTTTTCGCAAACACGCCGATAGCAACGTAAAAAAGCGGCGAAG  
AAACCATCGATGGAAGGATAGTTGACCCGTGCTTACGGATCACGACCTTATGTTCCA  
TCGAGCTGTCATAAGGGGTTATAGAGACTATATTCTTTTGTGTTGAAGTATACTGGAA  
TTGAAGTCAACTTATCAAAAACCGGATAAACATTTTGAAATTTTACTGACAAGTCAT  
CTTTATCTCTATACCCGCTCATGAGGGGCCAGATAGCGACATCCTCTTCCACACCTG  
AGGCCTCTGTTGGGGATCCAATTGAGGAGACCACCCCAACGTAGACCTTGCGGTCA  
GCCATTGTCAGCATTACAGGCTCAAGCTTAAGCTCTGTGGCAATGAGCTTATCCATG  
AGTAAGCGCAAAATCGGCAAATGGCTCACTGAACTTTGCAACAGAAACCTGTGCGAC  
AATTCGTAATCGACCGATTCTCCAGTCTTTTTTTCCAATTTATTTTTATAGATCTTAT  
ACTGTATCCACGCCAATGGATATGGCACAATCAAGGTCCCTAAACCAACCAAAACC  
ATGAAAGTATAAAATTGACTTTTCTCAACTGCCATCAGGCCAAAAGACGCAAAAGC  
TTTTGCACCTAAAGCCAAATAGTCTGTTGAGAATTCAGGAGTACAAATAGATTTATA  
AAAAACAAGGCAACGCGTTGGCCAATCGTGGGAAATCAATAAACTTAGAGTTGCCA  
CTACCAACAATGCAGTGAGCAAACATATCAAACCGTTATAGGCAACCAGCAGATAA  
AGAAGCTGCCCCCTCATATCTATGCAGCCTAAACCTGACAAGAGGATTTTTAAAGCAA  
AATACGTAACCACTAACAAAGCAGAGGCAGGATTAGAAGCAATCCCACCTCGACTTA  
CTTCTTCATGTTCTTTAACATTTCTCAGCAAGCTTACGCATCTGCCCTCAACCCCT  
TCTGCCTCCAGATACATCATACCGCCAGAGAGACGCAATGCTTTATTGGCTTTAAGA  
GCAAGAATGGCTTTCTTATCTTCAGCATCCTGCCGCTCATTGCTACGTTTAGAGATGG  
AAGGCATAAAAAACATACGTAAATCCTCTTATCTACACCCAAAACCTAACACACAA  
TCCATCCACTTGACAAGTCCCACGACATCAAGATGTGGCTCGGGATGTAGAAGTCAT  
TGCCGAAGGCAGCTTATCGTCAAGGTCGCGGCTTCGCTGCGCCGAGCGTTCCTGCGC  
CAAGTGTCGCGTCAGCTCCCCAGTGCCGTATCCATAGCCTTGCCGAAGGGGTCTCG  
AGCTTCGTTATTGGTCCAAGGCTCCTGTAGCGCTTCTTCCAGGGTGGCCGTCCACAA  
CTCGCCAACCTCTGAGCCAACCCCGGTATGAGCAACATTCGCTTCGCTTGTGCCGTT  
CGCTTCGCTTGTGCCGTTTCGCTTCGTTTGCTCCATCCGCAGCAGTCGCAGCCGTCAGC  
ACATCGCCTGGCACGGTCAATACATGACCAACCAGGCGACCACCGACCAATACCCA  
GTCGTGCTGAACGGTCAAACAGTCTTTCACCGTGGTGAGGGCGAGCACCTGCCCGC

CTTCCTCGTCATGCGGGCGACTTGGTCCTTGACCGCCTGTAACCTCGAGTTGAAGCTC  
CAACTCCCGAGCCTGCTGCCTCAGCCGTTCTAACTCGTCTACAAGGCGTCGCTCTTT  
GGGCGTCTTGCCGGCCCTGGCTTTCTGCCACTCCACTAAGTCTTCATAGAGGTAGCG  
CACGTGCTGATTGGCCCCGCCACCTGTGAGTCCTGCGCCTTTCTGGAAGGGTGGCCC  
CAACGGTGGGGAGCGGGCGGCCACTCCCCAGCGTGTCCAAGTGGACTCCCAAGA  
ACCGTGCCGCAGCTTTGCTGGTGACGGTTTGCGTCAACCCAGCTCTTGACGCTCCA  
GTTCTGCTGGTCCAGCGCGGCCTCCAACAGCGCGCGGTAGTCCTCTTCACTGCGAACAA  
CCTCAATCATCCAGTGCGGTCCGCTGGTTCCGTTGAGCAAAGATAGTAACCGGAGGG  
TCATTGGCCTCGTCCAGCCTCGGCTTGTCGTCCTTCAGTCGGTTCCACACCCGCG  
GACTCTTGGCGACCATCGCCTCCTCAACTCGCCCCATCGCTTCTCGCAACTTGGACC  
ACTCCTGCTCGGTGTAGCGCTCCGACACCGCGGCCATCCTGTCCTGGCCCTGCCCCG  
GGGTGTGATGATGCAAGAGCTGCGAGACAATTGCGCTTTCTCCGAACAAATGCGCC  
GCGTAGCGCCCCATGGTCCGACGGAGGTCGTGCGGGGTCAGTCCGATGTCGATGTC  
CTCGCTGAGGTTCAACAAACCTGCATCGCGCCGGACATTGGCCATGATGCTCTTGCT  
GTCTGAGTAGTGCCCCGATCGACTGCGGCTGGAACGTGCAGGGAAGACGTAGCGGG  
TTCGGTCAAGGGCATGGCGGGCCTTTTCCAATTCCACCTCCAATCCCTTGATCAGCT  
CCCGTCTGGCTCCTTTGGCTCTAGCGGCTCGAAGCAAGCCTTCCATGGTTGCGACCT  
CCTTCTTCGCCTCGGTATCGTCCAAGCGCTCCTCCAGACGCCGCTGAAGCACCTGCT  
CGGCGAAATACGTCACCGGCAAATAGCGCTCATCTCCGTTCTTGGTGTGCAACAGGT  
AGACCTGCGAGCCCTCGCGGGCGCGTAAAAGGATTGACCTGTCCCGGTGGCGTCAAC  
GACACCCACGACACCTCACGCTGAGTCAGCTCGCCCGGCGTGCAGCGGTGCAACCA  
CCGCAACGCGGCTGCCTCGCTGCGCCGGGTGCCCCATAACAGAGTCAGCAGCAGGT  
AATCGGCACCGGCGGGCGTTCAAACCGCCCTGCTCATCCCGGCGAGCCAGGATGACC  
TTCAACACCTTCGGCAACGTGTCATCCCCCAATGGATTGCGCACCTCAGCCCGGCTG  
TAGTGGTTGCGCAGGTCTTGAGCCCCGCGAAGCAAATCCTTGCTGTAGATAGCCTGA  
AATGGGTTGTAGATTATCTTGGGCTCCCGCCGAGCCTCATGCGCCTGTTCTTGTTCCA  
CTTCGTTGAACAGGTCTACAGAGCGCTTGGCATCGGTGAAGGTGTGCTCGGCAGCGG  
CAAGTCCCGCGGCCCTTACCCGTTGAATGTATTTTCCAGCGATGCCAGTTCTCCAA  
GCTGAGCTGTGGAAAGCTGGGCCCAGTCGTCGTGGGATGCCAAGGCCTGACGCATG  
GCGGTCGGGATACGGTTGGAGCGAAGCATGGCGCTCTTGCGCAACGCGTCGTATCC  
CCGCACCACGTCCTGGGTTGCGGTGTCCCGAATCTTCAAATCAGCCAGGCCACCTC  
GGGTGCTCCAGACGGGCCAAGCTGCTGCGGACCGCCTCGACACTGACCTGTTTCAC  
CTTCTTCTTTTTGGCCCCGCTCTCCCATGCGCTCGATGTAGAGCTCCATGCACTGCCGA  
AGCGTGATGTCTTCTGAGCGTTTGTCCCGACGCTTGGCGCGGAGTTCTGCGCGCTCC  
TGGTGCAACCGGATTAGTGCCGGTCTGCCGGAGCACCGACAGGTGACCCTTTGCTACT  
TCGTAGGCTTCGTCCAGCCCCATGTCGGTGACGTTGCCAGGGAAAAACGGCGAAT  
GCCCGTTGGACCTCGTTTGACCACCTCGTATGTGGTCTTGGTGTTCCTACCCGAAAA  
CTAAATCCGGAGGGAGCCTTGTCGCTTCCGTCTACCAAGCGGTAGGGTTGCGCAGCC  
TCCTCAGGAGACCTCTCCACCAACTTGACCTTGCCCGCGTTGTCCATCACGGGGATC  
CGATCCACCGACAGGCTCAGGACTTGGGCGTAGGTCAGCTTAAACTTGAGCGACCC

ACGCCTCTTTGGCAGGTCTGGCAGCTCCGACGTATTGCTCATGCATCCTCCATTGCTG  
TCGTGTAGGTGCCGTTGGCTGCAACCAAAGTCGCAACATCAACGCACGCTTTTCTTA  
CCATGCGAACTCGTCGCAACATGCCAAAGTGGGTCTCGCTTTGAATCGTCGCAACAC  
GGTCGCAACAAAAAAGACCGTTACTCCCCGCCACACCCCTCTTTTGACCGTCAGTTC  
CGTTACAGAGCAAATTCATAAGTGACTGTTTCCTCAGATATTTCCAAGCCTGGCAAG  
GCCCCCTAAGAACACACGCCTGCCATGAAGCAATTCTTCGCCGCCAAGTCGGACTAC  
CCCGACCTGCTGCTGTTCTTTTCGTATGGGCGATTTCTACGAGCTGTTCTACGACGATG  
CGCGCAAGGCCGCGCGGCTGCTCGATATCACGCTGACCCAGCGCGGCAGTTCCGGT  
GGTGCGCCGATTCCGATGGCCGGCGTGCCGGTGCATGCCTACGAAGGCTATCTGG

>CONTIG\_32\_length\_10029\_cov\_24.175621

TTGATCACGGGGAACCTTGCCAGGGCAGGTACACCACATCGATGTGCGACGGAAAGGC  
GCGGCATATCCTGTACAAACAGGTTGATGGCGGTGCCGCCCTTCATGGCGAAGATGT  
CATTGGCGAATACATCAGGAGCAATGTCCAACAGAAGCCGAACAGTGTGACGCTAG  
TGCTTATCCATGGGGGCTTAGGCTCAGCAAGGTGCCATCGTCCAGCCGGCTCATCCA  
GCGCCTGCTACTTCCGGTTCTGACCTGGTTGTGCTCAAGCAATAGGTCGACGTCGAC  
GACACCTGACTCTCGTGCCCATGTCAGAAACAATCGCACGGCTTTTACACTGGTACA  
GCAGGACAGCAGCTGTCCAAGCAGATCCTTACGCGGTGATCGAAGGCCATCAAAAA  
TATTGCGGCACTCCTCAAGGCTTTGCCTCGTGCCGGCGTCATAGAGCAGCTCCAGAA  
CGGCTCGTTCTGGCACAGACACCTGCAGGCCCTGGGGCTGTCCTGGGGGAGTATGC  
AGGGTCTTTCCGGCGAGAGTATCGTCTGGCCAGTCGAAGAGCTTGGCACCGACATA  
ACGCGCCGGAAAACGCTCGGTGAACCAGGTAGGTATGACGAAACGGGCATCCCCC  
AAAGAACGAGGATGTCCACGACGCCAGGTTGTGGCGGACCCCCTGAAGCGCCAAC  
GCGCTTTTCCCTCCGACGTGCAGGCCAGCCACTTGGCCTTGAAGGAAGCGCAGCGCG  
CCATTGACATCAAAGTCGTCTGTTTCGGGAATGCGTAGACGCCATGGGCGAGGCGTAC  
GAGCCAGCCTCCCTCCACATAGCGGGCAGCCAGCTGTGGTGACACGCCAAACAATT  
CGAGCGTAGCTAGACCGAACGGCGCACACCGTGGGAGCTCAGCCTGAAGGCGTTTG  
ATTAGCTGATGTCGTATAGTTCTACTCATATGTTAAATGTAAAACACAATCTAATCA  
CCTGTCATCCCAATGCACACTTATCGGGAAAAAATAGCCTCATAGTTGAATTTTATG  
TACAGATCTAATCATACTCGGCTGGTATGCATTGCCTAACCAGCTGAATCATGTGTC  
GGCCGAAGCTCATTGTTGGCACCCATGCCCGGGGAAAAAAGGCAAACCTGGACCGTAC  
ACATATCGCCCCAAGATAGGTGACAGCCATGAAGACGAACCCTCAACGCAGCAATC  
CGGAGAACTAGGTGCTGCTGGCTTGGCAACGCCTGGCGCTCATGTGTCCAGGTCGAG  
CGGAGACTCACGATATTGCTCTCATCAAAGGGTGTTCAGTCGGAGCAGCGGTAGCC  
TTGTTTTGGTTTGTGAAGGCCGCGAGCAGTCGCTGTACTGCTCTACACCGCATTCTGGC  
TCACCCTGTTGTTAGTGTTTGCGGTGCTACTTGCTCGCGGACTTGCGGGACGAGCCT  
ACGGTGCCGATGACTCGTTAGAGCCGCGCGAGGAAATGCGGTACGGAGAGGCAGGA  
TTCGGACTCTATTCCTCCGACGGTCATCGGCTTGACCCTCATGACCCTAATAGTCCCC  
ACGATAACTAGCTGCTGACCGCGTAAGGGATCAGCGGATCAGTTTGTGGCGCCCG  
ATGTTGCGGCGTCCCTTGATCCTTGCTACCTGCGGCAAGGTTTTGAGCTATCACTCC

TGCTCGTACTCCGACCCAACCCAGTGCAGCAACCCAAAATGTTGGCAGGACCAGAA  
ACATCGTCCCCATCACGAACATCAGCAGCAGGTCGCCAAACGCGTTGTTTAAGCCTG  
CAAGCGGGTCGAAGTTTGCATGCGGACGGTTGTAGCCAAAGCCCCACCCGTAAAGC  
GCGTCCAGAATAGTGCTGTCGATCCAACGGGCGAGCTGGAACCAGAAATCTACAAA  
GAACAATGCGAACTGCACGATGCTGACAGTCACCAACGTCTTCAGGTCGTAAGTCC  
CCACCACCAAGACCAGCGGTATGCAGATCACCAAGGCCATCTTCAACAGCGAAAGC  
ACCATCGGCAAAGCCTGGCGCACCATCCATTGCCGGGAAAGCTGCAAGCGAACC  
GACTGCAAGACCGACATCGCTGGCTGCACGGTTGACGACGTTGGGCAAAGTCTTGTC  
AATCTGACCGCCATAGTCGGTGTAGACAGAGCCTTGATTAAGCTTCTGCTGCCGCGG  
TGAAGCGATGGCTCGAATCACCGAGTCATCGACCTCCTGGCGACTCAAGAAACCAG  
CCCATCCAGCGACTCGGTTGAGCAGGCTTGGGTCGACTTGAGACAGCAGCCGGGCA  
CGCAATCCGTTACTGCCATCGCTCCACCACTGGCGACATGTTGGGTAACCCGCACCG  
CTAGGCACCCGCGCAAGCCCCGCATCCCGGTTGCTCTCGTAAGCCCAGCCGTCTCGC  
GGCGTCTTGGCGTGATAGGTGTCTAGAACCCGCTGGTATCAACGAAATAAGACGA  
GCCGATCCAGGACACATCATGCAATTTGCGTGTATCGAGCTGCGGGCGGTTTCATGAA  
CAACTTGGCACGCGCCGGCCCGTAACAGTCGTGCGTGAAGTCAGCAACTTCCTGAG  
CAAGGACCGGATCGTCAATGCGCGTGGCGTTGATATCCATCCGAATCTGGCGCACGT  
CGGTTCCGCATGGAATTGCAGCGACTGAGGCACCAGTGATTGCGCGCGATACTGCTT  
GTACGAAAGCCCACCAGACCGGCAACTTGGCACTCTGATTGTTGAGCGTGCTGAAA  
GACTGCGACCAACCGGTAGCTGCGGGTTCGGGCATGTTGACCTGACACTGCGTCGA  
ACGTGTTTGGTCATACTTGATGGTGTGAGGTCGACGTCGATAAATGGAATGCCGGC  
GAACATCACACGACGATTGCAACCCATAACCCGGTTTTTCGATTTCGAACGAAGACA  
GGACGCCCTTATTGCCTTCATCAGCCCCCTTCGGCCTTCGCCTTCAGCCATTCTTGAC  
AATGATGGTCAAGAAAGGAATTGCAAACACACCACTGGAAACCAGCACAGCCCAG  
ATTCCATTGTTGACGATCCAGCCTACCAGGGTGAGGTAGTACTCAAGGTAGTCAGTC  
GTGAAAAGCGTCATCGGCTGGATCTCCAATTACGACTGAAGCAATAAGCTAATTTCC  
AGAGCGACGATGGCTGCAACGCCGGCGACTTCAGTGCGGATCAGCCGGTAACGCGC  
TTCGGAGTCTGGCTCGCGAGCGAGCAGCCGACGGCGCATCCAAAGCCAGCCGCGGG  
CCGTAGCTGCATAGAGAGCCAGCCGCCACACCAAAAAGTAACCGGAAGCGGCAGCC  
ATCCAATTCTGCCAAGCCGTGACGCTGCCCACGAGATAGATACCGACTACGTTGGCT  
AGCAATGCCATAGCGAGCAATACCATGGTCCATAGCAGCACATGTGCCGTCTTCCG  
ATTGAAAAGCCAGCGAAAGCGCAGCCACTCGAAATTCATTGCACCCGCCCTGGCGA  
TGGCCGCTGCAATTGGTCGAGGCGGTCAGGGACAGGATCACCTTCGTAGACCCAC  
GCGAACCCGATGCCCTTGTACCGTGGCGCTGGATGATCGCCATCGGCGAGTTGTTAG  
CGAGCTCACGGCGTAGTTCAAGTTCGGTCTTCAAATTCTGGATCTCACGATCCAGCG  
TATTGCTCTCGTGGTTGATAGCCTCAACCGCAAGCTGATTGGCTGAAACATTGGGCT  
CTTTCTGCCCAGTCAGAAGCGTGC GTTGAACAGCAATGCCTTCTCTAAAACAGAAG  
ACAGCGCCACCTCTGAGGCCAGTCGGCGTGCGAGGATATCTTGGTCCGGTTCATCTC  
GCAGCGCTTCAATAACACCCCGGGTGATCGGCAAAGACGTGCTGCCGGCCGCGCGC  
AAATTTTCGAACGTGGTATTGCGGGTTCGTCGATCAGCTCCTGCAGGGACTGCAAT

TTGGCTTCGTATTCTTCCTGGATAAGTGGCGTCAAGCCAACACCCGGCATGGTTTGA  
GTCTTGGTACAGCCTTCGCAAGTACGCTGCTCCTGCTCCCCAAGACACGGGTTGCC  
CATTCAGTTGCTGCTTGCGGGGTAGGCCATGTCTGGCAAGCCAAGCTGTTGCAGCTA  
GTTGCATCTATCGACGAGGTATCGGTAACGCTGCGGCCATTGACCAGGTTGTAGCCC  
GCGCGGGTCACATCGGCGACCACCTTGATCGAGGACTGACCCGCACCACCAGCGTT  
ATTGCCGCCAACCCAAGGAACACCGTCATTGCCACGCGTTGTTTCAGCCTGCTCGAT  
AGCGGACACTGCATCGGTACTGGTCACAGCCTGGCGAAGAGCCATGCCCTCTGCTAT  
CTGGTTCCAACCGAGTTGGCCACCAGCCGTCTGGGCCATCCGTTCTGGCCATGGCGCG  
ACAGGTGAGTTTGAACGGTCAAAGTCCAGGCGGGCCTGCAGCACGCCATTGGTCA  
ACAGGTTGTAAAGACCAGGGTCTGCGCGCTGAATGATCAAGGCGGGCAGCGACGCG  
ACGGCACTTGTCGCGCTCTGAATCACGTTACCCATGATGTTCTGAAATCCATTCGTC  
AGCCCATTGAGCTGGTTCTGAATCGTCGTGCTGATATTCATATCCCCACAGACAAA  
TTGCTGTTCCAGCCGGCGCCAACGCCTATCGAGCGCATACCAGCGGGCGCCGCTCATG  
GAGACGGCGTTGCCGCCACCGACTGAATACATGACCTCATCGCCGATCACGCTTCCA  
CTGTTCTGGAAGCCACCGCTCTGGGCCCAGACAAATCCGCTTGCAAGGCCAAGTGC  
ACACGTCAGCAAAACAAGGCGCGAATGTCCCTGTCGACGGCGGCGAAGTGGGGAA  
ATTTACAGAGAGAATTTTATTGACGTGCCCTCAGTTGAAATCGACGCTGCCCAGGAA  
GACCTGACCTTGACGCTGGCAGCAGCTGTAAGGGCGCCATAAAGCCCACGCGTAGT  
CGCCCTGCGCTGCCTGAGGCAGCGAGCCGCTTTGGGGGAATACCGCACAGGTAGAG  
GACAGGCGTGGACTIONGAGTTGCTGCCACTTACCTGTTGAGGCATCGCTTTCTACCAGC  
GCGCCAGCCGGCCAATAACCATCGCGACTACTGGCGAGCAGGGGCTGATAGACGTG  
AAGTTGGCCTCGACGCGTCACGATGTCGCCTGCGCGCTGCGCAACCACAGCGCCGG  
CCTTGTTGGTCATCGGTCTGATGCAGAAAACCTCCGCGGGGGGTACACGGCGCCCCAC  
AGATTCATGCCTGTACGAGAGCCTATCTCTCGCATGCCAGGGATGAGCGCTTCGGGG  
TAAACGACTTCTGGCAAGTTGTAGCGCCATGCAATCGTATCCAAGGTGCTGAGCAAG  
TAGGGCATGAAAGCAGTACCAGCACCTTCGCACGCGTAACCCGATGCGCTGGCGAA  
TTGACTGAAAATCTGCCACCGGGGTGGCCGATCACATCCGCGTTTTTTGAACTTGAT  
CAGGTTGTTTTCGTTGTCATGATTAGTTGTTCCATCTCCTCCAGAGCGAGCAGTCGCG  
TTGGGCTTACTCATCGCACGTACTIONCAGCCCAAGGATTTTCACCAACGTTGGAATAG  
CTGGAGACCACAGCATCTGGAACGTAATGACGTACTTTGATTGAGGTGCGAACCGT  
GCACCCCGTCAACGTGCAATAAAGCCAATAGCAAATGCCACAACCCGATACTCCA  
GGCAGTCTGGCGAAAGCGTTGATGACACGATGCTGGCCGTATTCAGAGCGAAGCTC  
GACGTAGCACCGCACAGCAGCGCTGCAGCGGCACCCATTCTGATGTCGACGTGGAAC  
ACGAGCCATCATGGATTTTTCTGCGGTACTGCGCTACGCGCGCAAGTGCCTTGTCC  
AGGTTGGACTCTCCGTACACCACATAACTCTGGTCCACAACAACCGCTGGGAGCGTG  
GCGATGCCCAAACCTCCAGGCGTCGGTAACGTCTTGGTGAGCACTACGAAGGCGTTGT  
TGCAGCGCTTGGCCACCGCGTTCTAAGCGCTGCTGTACCAGCGCTGCAGCATGCTGA  
GGATCGCTTGAAGCTGCTCTGACAACTCGATTTCAAGCTGTTGGGCTTTGTCTAATT  
CTATGCGTCGGTCGACGGTCGCGTTGCCAGTCACAAAGTGCTTGGAGTCAGTGATTA  
CCCAGACTTCTTGAGCCTCGGAACTCCCCGGAACCAGCATCGCCAGTCCGAACAGC

GCGTGTCCGAAAACAATGTAGAGGTTGCGCATGGCGTGCTGCCTGGCAGTTGGAGA  
CCCATGTAGTCCAACGCATCCGGCTGACACATAACCACGAAGAATGAGTAATGCAGC  
ACGCCCCGATTTCTGCGTATCGCATCTAGCAAAAGGTCGTTACGCTCGCCGCCCCG  
ACCGATGCTAACGCAGCTTCGATTTCGTTCTAGGTCGGGCTGGGTACGCGCGCCGCAG  
AGTCGCGCACGATCCCCATGGATGGATCGATAAAGGAGTCCGAAAGGCGTGCCGTA  
TTTGGCCGCCATCGCCAGTCGACCGTGCGATAGCAGTCGTGAGAGTTGGTCGCAGGC  
CACACATGCCGCGTGCCGGTGACGGCTGCGCGCAAGTCCACGCGATCACCAGCCAA  
CATAGGCGCCATAACCAATGATGACGAAGCGTCCCGTGTGTCAGTGTAATGACCGATC  
ACGGCGAACTGCGGGGTGACCTGTTAGTCGCCAGCGACAAGGCGCCGACGGATGC  
TAGCGATCACGTCTGCAGGCTCCAGCTCGCCGAGTGCCACTTGGTCAAGCTCGGCCC  
GGGTCTGTGCATCGACCTCTAAACCCTCAAGCCGCTGGGATGCGATCGCGTTGGCCA  
CAGCGCGCCGGCGATCTTCGATTTCGTGTTTCATCAAGCATGATTTTCTCCTGCATGCG  
CGTGCGGGCTTCGGCTGCAAGAGCGCGCACTTGTTTGGCTAACTCCGGTGGCATCCA  
CTCATCGACGCGTTCCCAGTCGGGCGGAAACTCGTTCGCAGCGGCCATGACCCGTTG  
AACCATCTTGCTAACCCGCTGCCGGCTTAGGCCGGTCTCCTCTGCTACTTCTGCCTGG  
GACTTTCCATCTACAAGCACGCGCCGGGCGATCTGAACTGTGTGACAGTGAGCCGT  
CCTAACCGTGACTGGATTCTTTCAAATTCCGCGGCGGTTCATGGGCACTTTCTGCATTG  
CTGCAATATTCCTGCGTGATTAGGGCGGGGCGTGATGCCATCGTCTGTTGTGGTTTT  
GCGGCACGCCTAAACCTTACAAGAACGTCAATACTGATCAATACCTCAAAGAAATT  
CTATTGAAACCCTAGCGCGGTGCTCAACCGTTTGTGCAAGTCTGGCCATGCATCAC  
GTCATCCGTATTCCCGGATTCGTAGGAGATGGGTAGTCCATATCTGGCTGCTGCCCC  
TTAGCCGACGCCTGCTGTCGATCCACGTTAGCCATCTCCAGTCGCTGCAGCGATTGC  
TCGACCGGCGTCTGCACGGCCAAATCGGTTGGCATGGAAGCGCGTAGGTGATCAGG  
GTCACTCAACCGCCCCTGCACCACAAATACATCGCGCCCGGCTGGCGTATCTGCCGT  
CTGGGCGCTCAACACCACGTGGTTCGGCCCGGTCCAGACTGTTCTCGCGGGCAAGTAC  
CATCACGCTGGCGATCAGACGGTTGCTGTGTTTCATTAGGGGTCCGCCCCGGCTTGCGC  
ATCAATGGTGCTCACCCCTGCGTGACCTGCTGTAGCAACGCATAGTCTTTGTGTTC  
GGGACCTATATCGGCGAGACGAATGGGTGCTTTACGGTCGCCAGGCATGCCATCAA  
TCGAGGCAGTAAATGGGCTGCGGGTTATTGAGCGATACGGGTCGTCTTGTGGAAT  
GAGCGGCTTTCTGCTGCCGCTCCAGACGTACCTGACGGGCATCGTTCAGTTCGGCAA  
TCCGGGCGGGATTGGTCTCTTCTTGACGTAAACGTGATCACCGCTCCCGCTGATCTT  
GGCCCACTTCTGATCCCGCTCGAAGTACATCGCGTAAGAACTCCTACCGCCAATCAC  
ATTGGGGTCTACAGAGGGGCGGCCTTCAACGGCCTGAGCAAATTCTTTCGCCCCCAG  
ATTGGCCAGATACTTGCTGCCTTCTATCAGGCCCATCTGGGAAATGGCGTCATAGCC  
GGTATTGCCTATACGTTTGGCGCCTACGTATTTGTTGTGCGAGCATATTCGTCCAGACC  
TGCTCCAGCTTCTGAGGACCGCTTTTCTCCAACGCTGCATGCAGAAGTACTCGAGGC  
GTCCAGCAGTTGGGGTCGAGTTGATGGTCCGAGAAGGCTCGATCATGTGACCGCATC  
ACGTCTGCTCCGGGAAGGTTTCAGAGCCAGGTCCGGGCGCTCCTTGTCCATCCAGGAT  
TGCCGGAGTTCAAGATCTTTCTTAAGGAGGGTCTGTCCGAACTCTTCCCCTGTGCT  
CGCTCAACCGGGCATTAGGGAAACGCGATCCATTGTCGTGCTGTTCTCTGGCGTAGT

CCTGCGCATAGTCGTTTGGCCACCTGGCCAGGCAAACGATCGTTGCGAACCACGCTTA  
GTGCCAGACGTCCATAGCCATCCGCACCCGGCAATTGCGATAGGTAGTTCCAGTAA  
AGCTCCCGATTCCCTGCGTTCGCGTAGCTGGAAAGAATCTTGAGGTTGCGCTCAGTC  
AATCCACTCATGTCTACTCCCTGTAATACGCGGTTACCTAGCCTTGGTGCGAGCC  
AGAACGCTCCTTACAGCGTCTTCCATGCGCTTCCAGTCTTTCAGAAACGCGCGTTTAT  
AGTTCAGGCTGATGGAAAGCTTGTTCTCGATATCAGAGAAATAGTGGACGCAACTTG  
CGGCAACTGCTCCTTCCTCGTGGACCACTTCATCGCCTTCCAGCCGTACACCGTCCCC  
GCGGAATTTTCTGCTATCGCACTTGATGAAAGTGATGAGACTGCCACTGGAGTCGCG  
CGCGACATAACCAGTCGTCCTCAAAGGCAGGATTACGGATAGGTGGCTTCCCGTAGTG  
GTCTTCGTACGCTTTCGAATATGCCGCCATCTTTGCCTCGTCGATGGCATATGGCGTT  
AGCCCTAAAGTCTCCGGTTGTGCAATGCGCAGATCGAGTCTGTGACGGGATTACCA  
CGTTCGACCGAACCTGCCTCAGTGCGCTTTTCGTTGGAGGAATACCGCGCTAACAAT  
GTCTCGATAGGGATACGGTCCACATAGTCGATCGCCACAGCGATTTCTTGCGGAAA  
TCATTCGTGCGCGGGTTCGCCCCGCGCGCCTGGCGGGGTCGGCGTCAGATCCGGCCAC  
TCGATGATGAGCGTCACCCCTTCGCCTGGCCAAGGCGCGATCTGGCTATCCAGATAG  
TTGGCAGGAATGCGGAAGGTATTAGGTCCCAGCTTTACGTCAACAGGGGCATCAGA  
GTAGGTATGCCCATTGATGATACGGCCCGTATGTAAAGTTTTTCGACATGTTTGAAC  
CCCTTCTTGTTTCGGTCGGCGGCGTCCGTGCACACGCACTGCCAGTCAAAGTAACGGC  
GAGTGCAAGTGTCAGGTACCGGCCGGATGACATCCGCATAGGGCCACTCCATTGCA  
AATTTTGCCGTCAATATAAGCAAACCTCTTGCAAAAGGGACAGGAACAGCATCACTT  
CCCTCAGCGAGGCATGAACCACCGTACACGCTGAAGAACTGAAGATTGTCTCCGGC  
CTGATGAACTCGCTCGTGATTGTGCGAAAAGTATCGTGAGCTGCGGGTATCGCTAGG  
GCTCTCTAGTGACGTGAGGCGTCGTGTCACTTGGGGTTTTCTTCGCGGGAGCTTTGA  
GGCGCTTCAGACAATCGTGAGTCTGCCACAGCTTCCATGCCATTCTCAGGCGAGCTC  
AGTAGATCCATTGCGGATAGCAAAGCATCTCCAGAGACTGGACCCGTTAGGCTCATC  
GAGCGACTCGTTTTTGTGTCAATCAAGCGAAGCGAGGGAGTTGCATCAAAGCCATC  
ATGGCGGGCTTGCTCGGCTTGCAAGCGCACTGCCGCGCCAGGACGATCACTTTTCAG  
GCACTCCCGCACGGCAGATTCATCGGGGTAACTCACACCAGCCGGAAGGC

>CONTIG\_33\_length\_9794\_cov\_15.720492

GTGCATGCGTACTTCCAGATTTGGAGCGAAGTGGATGAGCACGGAGTGAGCCTGCT  
GGAGCGGGCGTTAAAAAATCAGGTTGGCGCGGCCCGCGAGAACTGGGGCGCAA  
CGCACGCAGCAAGTTCTTGATCGTCGACGCGCAGAGCGTGAAGAACACGGACACGG  
CGAGTCAGAAAGGCTATGACGCAGGCAAGAAAGTTGCCGGAATCAAGCGGCACATC  
GCCGTAGACACGCAAGGCTTGCCGCACGCCATTGCGGTGACGACGGCGGAGGTGAC  
CGATCGTAAGGGTGCGCTAATCGCGCTTGAACACGGCAAGCCGAGTTTGAAGCGTG  
TCAAAAGCTTACTGTGCGATGGCGGCTATGTCCGTGAGCGGTTTTCGCGAGGGAGTGC  
GCGAGAGCTTGGGCAAGACGGTCAAAGTGCAGATCGCAAAGCGCTGCGAGCTGCAC  
ACCTTCAAGGTCATGCCCAAGCGCTGGATCGTGAGCGCAGCTTTGCATGGTTAGAG  
AAGAACCGAAGGCTATGGAAAAATTGCGAGCGTCAACTCAACACCAGCTTGCAGAT

GATCCACCTGGCATTCTTGGCGTTGCTGCTTAGAAGACTTTGAACAGGCTCTAAGGC  
CAAGCGCGGGTTCCACTCTTTGCGAAAGACCTTTATCCAGGAGTTGCAAGGCCTGGG  
GGTGTCTCAGAGCTGCGTGCGCAGATCGTGGGGCACGAGCTGGATGATGAGCATC  
ATGCGACTTACAGTCGGGACTTTACGACAGTGGAGAAGCTGCGCGGCCTGAGTCAG  
CACTCACCCGGCATTGACAAGCTCAGCTATGGGCTCAGTTCCATTGCACTGAGCGTC  
CATCTTCGGAAGCTCGCGGCCTAAGGCAATCTCAGCTGGTGATTCTTGCTGCCTTCA  
TGATGCCAGCAGCCGGCCGGCACGCGTTGTCTTTGAGGGATTGTGTCTGTATCGTCT  
ACACATTGTAAAGACAACGGTGTTCCCATGTCTGAGCGTAAAACAGAAGTCGTAAA  
CCTGCGGATGAGCGCCCGAGTTAAAGGCCTTCTCCGTGAGGCGGCAGGTCGGGAAC  
ATAGGACGCTCTCTAACATGTTAGAGGTCCTTATCGAAGGTTATTTTCGACGCCGGAA  
ACCAGGCCGATACCTCGCCGGAATCAGGACGCAAACCTCCGATCGATTTCGAGAAA  
TCAACCAGCGTCGACACAAGTCGCGCACATCGCGGTTAAAAATAATGAACGAAGCT  
ATTTCCCGCTTTTTGTCCGTTCAAGATGAAGAGCTGGGGTCTATTGCAGGTGAAGAA  
TTGGAGCTTTCAGAGATTCTTTATGATCGGCCTCAATGTAAGCCTTTCTTGCGGTGGG  
CAGGTGGTAAAACACGATTGTTGAGTGCAATTCTTCCCCATGTTCCGACAAATTTTA  
GAAACTTCCATGAGCCGTTCTTAGGCTCCGGCGCAATTTTTTTTTGCGGTTTCGATCGCG  
TGCACAGCAGTGCTATCTATCCGATCTAAATAGTGAACCTATTAATCTCTGGCGGGC  
AGTGCAGGCGAGGCCGCGCGCTCTTTAATCGCCTTCAACCCTACCTGGATAGGCA  
GGGGGAGGATGAGTATTACGTCATTTCGCGCCGAAGCTCCGACGCAAGCTCTTGAGC  
GTGCCGCTCGATTCTTTTATTTGAATCAGACTTCATGGAATGGACTTTGGCGCGAAA  
ATCGCTGGGGTGTTTTCAATGTGCCTTGGGGTGCGCGTGCTTTTAGGGGTATTGAATT  
CGCATCTTTGAAAGCGGTATCAGATACCTTGAAGGATACGGAAATCGTCGAGCAGG  
ATTTCCGTCAATCAATTGCTCGTGACAGCCTGGCGATTTTGTCTATTTGGATCCACC  
ATACCTGCCCATTTCTGATACCAGTAAATTTCGCTGGCTACAACGGGAAGCGCTTCCG  
AACAGCCGATTTAGAAGAGTTGGCCTTTTTGTGCGAAGGCCTAACCAAGCGAGGTGT  
GCATTGGATTGTTTCAAATAGGGACAATGAACACATTTCGTAAAATTTTCTCTCATGC  
CAAGGTTTATTCGTTTACCACGCGTCGCTCGGTCTCAGCTCAGGCCAAACGACATAT  
TCAGCCTAAGGATTCGCCAGAAGTCATTGTTGTAGGAGGGGGGATCGATGAGCCA  
GCAGCGCGTTTCGTGCCGTGATCTTTGCGCGATACACCCTGTCCAATTTTAAGGCGCT  
CTATGGTCGCTTGCGGAGTAGCAGCAGTTACAGCAAGGACTACTTTCAGATTAATGC  
AAAGGCAGCTTCGATAGTTGCTGATGCGCTAGGATTTGCTGGCGATCGAGTCAATCT  
TTCCTATGCTTGGCCCGATGGCGGTCAGATAGACGGCTACCTTCTATTTTCTGCCGAC  
CGTCTCCACTTGGGATGGGAAACCAACAAGCCACCTTCTCCTTGGCGTGTCGGTCAA  
GTTGGTTTCGCGTCCAGAAATAAGCTTGGAAGGGGCTGCGGATCTGCAAGCGGAGGC  
CGACGCAAATGCTGTGTTTGAGGCGATTAATAGCCACATCACAAAGCCCTGGCTAAT  
TGCTGTAAAACTGGCGGGTGAAAGCGCAAAGCTTCATACGCGAGTTTACTTCGAAA  
ACCCACCAGCCGAATTTCAAGATCGCGGATTGGATCAGCTTCCTTCGGAGGTCTGTGG  
CTGCTATCGAAGCGCTGCCCCGAGTGCTGGACTTGGAGCGATTGGATGGGAAGAG  
CCCAAGAAGCGGGAGCCTCGCGCTCCGGCTGTTGTCAAAGCGGTGCTCGAAGCGTT  
GGAGCGCGAACCGAATGTGCTCCTTGTTGGCCCGCCGGGAACCGGCAAGAGCGTCG

CTTTGGAAGATTTGCGAGAACACTATCGATCAATTCCCAAGGCTCCGCAATTTGATC  
CAGATTCTTGGCCTGGCAACTGGACCGATGGCTCCGAGGTGGAACAAGAGACTGTTT  
CTGACTTGCGAAGCGAGGCTTTGGTTTTTCACCCCGCGTATAGCTATGAGCAGTTCG  
TAGCCGGACTCTTTCCTAGCTCAACCAGTAAGGGCGCAATCAAGCTTGAAGCTAAGG  
CTGGGCCGCTGCTGTCTTTGGGCCACTGGGCTTCCGCTGACCCTGGACGAAAGGCGC  
TCTTGATTTTAGATGAGTTCAATCGTGGTTCGGCTGCTGCGATTTTGGCGACACGCT  
TGGGCTTTTGGATGGCGATAAGCGTTCTGGCGCGGGAAGGGCTGGTTCATACATCTC  
CCGTCTTATCCCAACCAAGAGATGATGGTTGCCCGGATTTACAGGCGGGACCAGGC  
AGAAGAGGAGCAATTCGATTGAGAATTGAGGCTCCCGGCAGGGGCTTCACATTGTGG  
CTGCGATGAATAGCACTGATCGCTCAGTTGCGCCCCTTGATGCTGCAATGCGTCGCC  
GTTTTAGCGTCATTCGAGTGGGTCCGGACTATGATCTGTTGACGAGACGCCTGCTTG  
AAGATGTCGGGAAAGCTGACAGGGATCTTCCTTCAAGCCAGAGCGCTGACGATTGG  
ACACCGGATGATGTCGCGTTGCTTGCTGTTTGAATTCTTCGAACCCTTAATGACCGC  
ATCGAGTTTTGCTTAGGTGAGGATTTCTTACTAGGACATGCTCTCATTTGGAATGCG  
GGTATAGGCGACACTGCTGAGCGTTTGCGCCTCCTATCCATTGCAATGGATACTAAA  
ATCGTTCCGACTTTGCGCACGACGTTCTCGATCAAGATGATGTTCTAGCAGTGGTG  
CTCGGAATCAAAGACTCAGCAGGGGTTTCCAGTGACCGGGAGGCTACCGAAGACAC  
CTTAGGCTACTGGCGTTCGGCACCGTCTGCACTTGCTAGTATCGCTCCTAAGAGGCT  
CGTTTTACGAGAAATCGGCGCTTTCGATCCTGCGAAGCAACTTCGTATCTTGCTCGC  
CACTGCCCCGTGATTGATAGTGAGGACTATCGAGGTCATTGAAGGGGTAGACTTTGCG  
CTATCCAATGCAGATGCAGAGCGACTGAGGGCAGCAGTAGAATTGCTTCGCCTTCA  
ATTACGGCCGAGTTTCAAGCTGCTATATGAGCAGGGTGGACTCCTGCGTCTGCAAAA  
TGTGCTGGGGACCAATTGATCTTGGGCGTGGTTTGACAATCCAAGTTTCGCCTAAGGT  
CAGCACCAATGAAGATTGGGCAACGGCCGTTGTCTCTCTTCTAACAGGCGACGAGG  
GTATCCATATCGCAGGGGAACGTAGGGCTGGGACGAGTCGGACGCATGCCACCTTG  
CTCGATGTTCTGGCTGACATCTACCTCAATCGGTTGGAGCGGGCTTTTCGACAGGAA  
GGGCAATTGCCATCATGGAGCGTCGGAAGTCCGAGCTTCCTTACTTACAAGGGACA  
CTGGATGTAAGTCGTTGGGCGCAGACGGCGTTGTGGCGTCCTCAGATCTTTCCTGTC  
TCGCGGACACTTCTTGTATCAGACAATATCTTTACGCAGAACTTGATCTTCGTTGCGA  
AGGCTCTCGCAGCTGCGTCTACCCACTCACGCGTTAGCAATGGGTTGCGTCGATTGG  
TTCGAGATTTAGCACCAGGCAGTGGCTCAAATGGCACAAGTAGCCAGACCAGGGCG  
GGCTCGGCGCTCCCCGAGCAGTGGAGTGCTTATAAGCCTGCGTGGTCACTTGCCAAT  
GCAATCCTGAGTAAGACTTCATTGTTGGGGGCTGCTGGGCATCACACAGGCTTTGGA  
TTGGCGGTTGAGGGTTGGCCTCTTTTGGAGACCTTCTGGAAAGAACACTACGATCG  
CTAGTCGCGGTTGCTGCTCGCCAAGGAAGAGCGCTTACTTATCAAATGCAGAGCAA  
GGTGCAGCTGCTGTCTCCCGTGGGTGTGGGTTCGAGCCTTCAATCCGAGTGCTGACGC  
GCTTCTTGTTGAGGAGGGACGGGTGTTGGCTGCTTTCGAGGCGAAGTATGTCGCGTT  
TGACCAGCGAGTTCCTGAGCGAGGGCATATCTACCAAGCACTCAGCACCGCTGCTG  
CCTGCCAAGCACCGGTCTCCGTTCTGATCTATCCAGCAGCCTTTCCTCATCAGGTGTG  
GGATACTTGTGCGTTTGGTGACACTCCTAGGAACTTGTGGCTGTTGGGTTAGATCT

GTTCAAGTATCGCTCCCCGTTCAAGCTGAGTCGCAGGCAATTGAGCTGCTTACATT  
TCTTGATGGCGTTGATGCAGAGCGGGACAGCGCGAGTGATGCCTCGGTTGCCTCATC  
GCCATGACAGTAGCTTGGAACGCTGTATATCGGGCTGCTGATGTCGTTTGCCCAGAG  
GAGCCACTTCGGGGCAACTAACCTTCTGATTGCTGCTGCATCTCGCCATGGCGCGCGG  
GAAGGGGCAAAGCGTTGGAGTGGCGCGGCTGCGCGATCCGCGATCGTCGATTTAGC  
GTTGTCGCCTCTGCCTGAATTTCGACGGCAACAGTCACGACTGGCAACGAGTTGCCGA  
ACTTGCACTGAGTGCTTCTTATTTGGGTAAAGCGCCGGAAGGGATGCACTCCTGGGC  
AGCTTCTTATCAACGAGCATCCAGCACTCAAAAGAGCCTGGGTGCATATGCCACGC  
ATGACGCGTTTGCCGCAGCGCTAGCGCGGATCACCTTGGAGCCTTTGGCAGAAGATC  
GCATCCATCGGATAGTCGATCCGAGTGTGCGGTGCAGGCAATTTGCTACTCGCAGCGA  
TCGAACAGCGGGGCCGGCTGCGCAGTAAATCCCACCTCAAACGTTTCATCCTCTCGT  
TGCATGGTGTGAGCTTGATCCGCGTGCAAGAGAGCTCTGTTGTCTATTGCTGTGGC  
TAGCTGGCGCCGATGCGGGTGTGAATCTTCAACAAGTCAGTGAAAATATTGCTTGG  
ATAACGCGCTCACGCGTGATTGGTGGTCCGGGCAAGAGCTATATGACGTAGTTCTTA  
TGAATCCCCCGTGGGAATCGCTGCGTCATAGCGTTGGCTTGGATGGCGACGAGGAG  
CGAGCGAGAACAATTACGCGCATGTCAGTCTGCGGAGAAGGAGCGCCTGGACTGCC  
ACCACTTTACAGCGCCCAGGGTAAAGGGGATCGCAATCTCTTCAAAGCCTTCGTTGA  
ACTTGTCCTCATCTCCTTATCGAGGGCGGCCGCTTGGTGCGGTGCTGCCGGCAGC  
ATTTGCATCTGACGCGGGTATGACAGAACTGCGAGAACGCTACTTCCAACAATTCGA  
AATTGCCCGATGGACTGGCTACGAGAACCGCGCGGGCTACTTCCCGATCGACGGAC  
GCTACAAGTTCGGTCTTTTGGCAGCGACGCGTTCCAATGCAGGCACTAAGCGGTTGT  
CGGTGCGCAGTTTTTGGCAGCGGAGCCCAGCGAGGTTGACGCACCCCATATCCCGCTCC  
GCCGTAGCGATATCGCGTTAATTGGCGGCAAATATCACGTCATTCCAGAGCTGTCGC  
ATAAGCGTGAGTTGGATGTGCTTCGAACTGCTCTGAGTTCAGGCACTCCTCTGTTTG  
AGCCTGGTCCTCTGGGTGCGGTGCGCTATCGCCGCGAAGTTGATTTAAGTCTCGGAA  
GAGACCGCTTTCAGCATGTGAGCAAGGAGCGACTAACCAAGCTTAGGGATGGAACA  
TTCCGCAATAAAAAAGGAGTTGTGCTTGCTCCTTTGATGGAGGGCCGTCTAGTGGGT  
GCCTACGATTGTGCCAGAAAAGCTGGGTATCCGGCTCTGGCCGCACTGCGGTTTGG  
GAAGACAATGGCGATAGGCCACTTGCGCTGTGCACCCACAGTATGTGATGCCCGT  
GGAAATGAACGCTCCGCCGCGCGTAGCCTTCTGCGATGTCACCGCTTCGACCAACAC  
AAGAACCATGATTGCCAGCTTAGTGCCAGAAGGCTGGCAATGCGGTAACACGGCGC  
CAGTGCTTGAATTTCCAGACACGCTGAGTGCCATATGCTGGTCTGGGCATCTTGAATT  
CGATGGTGTTCGATTGGATCGCTCGCCGCATGATCAGTGGGCTGCACCTCAACAAGT  
TCATCTTGGAGGGTCTCGTCTGGCCACGTGTTTCAGCAAGTCAGCTTGAAGTATCG  
CTGCCGCTGCTTGGAGCATTTGTATCCATAGCCCTCGCGCGGGACTGTCTCCTCAGG  
ATTTGCGCTCCCCACCTTGGCACGCAACAGAAAAAAGCTACGGCCGATTGACCAC  
ATTGAAGCTGCTTCTACGATTGAAATGATGGTGGCGAAAGGGCTCGGTCTTGACGCC  
TCGCATCTCAAAGTTATTTATGATCGTTCTGTAAAGAACGGCGAGGCTTTTGGAGG  
CATTTCAATGCCGACGCGCGTGCTTTTGATGTCACCGAGGCAGCCGCGTTCAAAGCT  
TCGCTCTGAGTGGAATAGATGCCTCTAGCGCGACGGTTGGAGCTGGAGAAGCCTAG

TGCTTTGCTCTGTATTTTATTTATTTTCATGCCAGGCACTCTGCCTGGCAGCTGTGGAG  
GCGGTGAGGGGGCGACTTTAAAATCTATTTGGCTTAAAGATCGATTCAAGAGCATCT  
TTTGCAAATTTGAGCGTGCGCTACGATTTTGAGCGTTTTTCGTGACGGGAATAGGCG  
TGAGTGAAGGATCGTCGGTGCACTCGTATACGTCCATGAAATCGATCGCGCAGTTGA  
GGAATGCTTGAACCTTCTGTAATGCTGTTTAATTTCGAGAAAGCCGCGCTTTGGCGTGG  
CAAATTTTCGTGCGGCCAGAGGTAAGTAAAGCTGAAAAGTCAACGGCGTTATTGGCTT  
TTGAAGCGTCCGCGTGAAGATATGATTTCCATTCTTTCTCGAAAAGGGCAGTAATTT  
CCTCCTTCTTTATTCCTGAGTGAAGCGAACTAATTACGCTGGCGCGAACCATCTGCTT  
TGCATTCTTGTA AAAAGCGTAGATCGGTTGATAAGCCGTGAGTGCGCTACACGTAAA  
GGCCAGATCTTCGTAGACGAGATAGTGCACCCAGCCCAATTGTTTGAAGCTCGGTAG  
TCTTTTGCCTACGGCTTTAAGCACAGCTAAACCATGATCAGCCAGACGCAAGAATTG  
TGGTTCTGGATGCTTCTTAGGTGCCGCTCTCGCCGAGAGATGTGATCCACACTGAA  
AAAGCCGCTTTTCGACTTTTTTGCTTGGAATATCGCTACGCGGAACTGGTTAGCGCT  
GACTCGAATGATCAAAGCAAAGTCAGCCCCGGTTCCTCGGCTCAGCCAAGATGTGCT  
TTCCACTCTTGGGATGACGGATCCAGGCGAGCGAGGGCGAGGAGACGGCGTGAAAG  
GCCTCAACGCACCAAGGCGCGGTTGCGGCGAATGCGCCGAGCAGGGATGCAGTTAT  
CGTTTCCTCGTCTTTGTCTGTCAGGACGCCGCTAGTCAGAAGTTCAAGCAGTGCAAT  
CTGGAACGTTGCGCCGAGCGCGTTGAGCGGATGCTGCTGAGTGACCCCTTGAAGAC  
GTTGTTGCACATACTGGTGTAGATCGAGCGTTGTCATCGTGCAATCTCGCATCGTTA  
CTGTGTGGCGACCTTACAGGAAATTGCTTCTTCTGCCATTCTTGGAACCAGTCTCGAT  
CAACAGGGCCCCAGATCCCAATGTGTTTTCGGACGAGGAGCCTCCAACAACGAGGA  
GTGGGGGAGGAGTCAAAAATGATGCGCTGATAGATAACAGGGCATCCCTTGATTTC  
ATTTTTGATCCAAGATGCAAACCTCATCCCTTTCTTCAGATTACATATTTGCAGGCGA  
TCATCGAAGCATTGATATTGTTTCAGATCTTCATACCTTTGATAGGCGAGGTTATCCC  
AATACCGTTTGGCTCTAGAAAGGTTGCGAAAAACAACGGTCCTCGCGCCGTTGTGAT  
TGGGAGTGTTAGCCAAAGGCGTCGTTTTTCGTGCAACTCCGCCGAAATATCGAAGC  
CTTCTATGATTTTTAGATGGGCGTTTACAGCTTGAAATAAATTGAGAATTATTA AAA  
AGCTATCCATGATCTGGCTTTTGTCAAGTTCAGATATTTAAATTTAACATTTATGACT  
GCCGGTGCCTTGACGAAGTGCGGCGCTTCCCTCACTGATCCATCCGCTTGCGTTGCG  
CGCTTTTTCTGACAAGTGCGATCACAGCTGCACTACTACAAGCAAGGCGATGAGTAG  
CGATAAAATTTCAAATTTTCGATATGGTCCTCCCCTTGGAACAAGTAGGAGGATGTCA  
AAAGAGAAGGAGGGAAGTTCATGGTGTGGAAGTGCCGAGGCTACCTCTGTTTGGCG  
CCGACTAGGCAGGGCGACCTGGAATGGAGAGTCGGGAAAATTGCTAAGGGTTGGCT  
GTGGATGCATCGAAAAAGGAGACATCGCATCCCGGTCGACCCATGAAAGCTGTTGA  
GTTGGCTTTAGCGCGTCGATTGCTATCAGAGTTCTCGTCTCCGTGAATCGACGTCCAC  
CCAATTTTGAGTAGCGCCTCAGTTTGGAGTCCAATTCCCTACCCCGAGGAGATTGGA  
CGTGAAGAAACGTTTTACTGACGAGCAGGTCATCGGCTTTCTGCGCGAAGCCGAAA  
GCGGCGTGGCGATCAAGGACCTGTGCCGGCGCCATGGCTTCAGCGAGGCCTCGTAC  
TACCTGTGGCGCAGCAAGTTCGGCGGGATGAGCGTGCCCGATGCCAAGCGGCTCAA  
GGACCTTGAGTCCGAGAATGCTCGACTGAAGAAGTTGCTAGCCGAGCAGCTGTTCG

AGAACGACCTGATCAAGGATGCGCTGCGAAAAAAGTGGTAAGCGCACCGGCGCGTC  
GTACGCTGGTGCGCGAGTGGATCGGGCGCGGTGCCAGCGAGCGTCGTGCCTTGGCA  
GCGATCGGCATGAGCGCCAGTGCCTGCGCTA

>CONTIG\_34\_length\_9694\_cov\_364.544267

TGGGATTGCCTAACTGTCTTCTTAAGATTGATTGGATTAGGCAAAGCCACCTCATTT  
ATCTGGAGTTCATTTTATTTGCGTGAGATATCTCTCACTTTCCGCCCTTTTGTTACTTT  
TAAACACTACACGCGCATTGATGGTTTCAAACCCATTTATACCACTGCAATCATTCG  
CCCATATAGCTTGTGATAAAATATTTTATAAAAGTCTAACTGAAAATTTAGCTGTTT  
GAATGGCAATTAGTGAGATCACCTTAGGCAATCATCGGCACGAAATTTCTGTCCTAT  
TTTATCATTGACAGAAAATCCCCTCCCCTTATCAAACGTCTACCTCCTCAAAATTGGA  
TTGTAGATGCGCTTTAAACACTCCCAGCTTCATCAGTATTTGCAACACCCCCAAAGGT  
CAGTTACTCATCCGCAGCATTTCGCATCGGCAAAGTCGAATTCAGCGACATGGCCGTT  
CAAGACCGAGCCGGCGCGCTTCACCTTCAAGATCTGGTCCAAGCGACTTACGACCAT  
CATGAAAAGCTGCGACGGCTTCGCCGATCCGGAACCTCGCTATCCCGAGCCCCCTACCC  
TTGGCCACTCCGGCGCGACTGCTCTCTGAAGAGGTCGACGACTTCCTCAAAGACAAG  
GAGCGGCAGAACCTTCGCACCACCACAATTGATGCTTATCGCCGCACGCTTGATATC  
TTGCACCGCGTGAGCGGCAACACCTCTGTTGCTCGGATCGACCACACGCACATCTAC  
CAGATGTGGGATCTGCTGCGATGGGCACCCGAAGACTTCATGACCAACCCCAAGCA  
TCAGGGATTGAGCGTCGAAGTCTTGATCGCCAAGGGTCAACGCCAAGGGCGGGCGC  
AACCTGCCAATGCCACGTTAGAAGTGCACCGGCGCTTCCTCGCGTCCTTCTTCAACA  
CCTTAGTCAAAGCACGTGCCATCCCACACTCGCCGATGGATGCGTTCAAGCCGGCTA  
AGGAAGAACTCCTGGCTGTTTCAAGGATGAGCCCGAGCGTCTGCTTTCCTTGAAGAAA  
TTCAGAAGATCTTCAACCCGGAGACCTTCCTGCCGTGGGCCAAGAAATACCCGCAC  
AGATGGTGGTGCCCGCTCATTGCCCTTTACACGGGCGCCAGGATCAACGAGATCGC  
GCAGCTCAAAGTGGCCGACATCGTGCAAGACCAAGGCATATGGTGCTTCTCGATCC  
AGAAGACCGTGGACGAAGATCTGGCGCAAAGCGCCGGCAAGCGCACCCGGCAAAG  
CCTCAAAGGCAAGAGCGCGATCCGCAAGGTGCCGATCCACCCAAGCCTCATCCAAG  
CCGGCTTCCTCAACTTCCTGGCCGACATCAAAGCGTCCGGCCACCCTCGCCTCTTCC  
CCAACTTGTCTGCAGGAACCTGCCGCAAGACCGGTGAGCCGAATGGTCGTTACAGT  
CAAGGCTTCGTCAACCAATTTGCGAAGTATTTGAAGGAGCTTGGCTTTGGCAAGGGA  
ATCGGGTTCGCATGCCTTCCGCCATACCCTGGCTACCGAGCTCGACGCCAAGGGCGTG  
CGGGTAGAGCACATCGCCTTGATCACGGGTTCATGCCCTCAACAAGAAGGCTCCGGT  
TCTGCAGGACAACTATGTGCACAAGTCAGCCGGGAACACTCGGAAGATCCAAGTTG  
AAGCGCTTGGCCACTATCAGCCGGCTGTGACGCTGCCGAGCTATGTGCGCGGACAG  
TTCAAGGAGCGGCTGAGGAAGGGAGCGAGGATGTATCCGTGAGGAGCGCGTGCAA  
AGCGTCTTGCTGGCAGACCACACTCGAGACCGGTCAGGGCCGTCACAAGTTACTTGC  
TCGGTTTTGACCAGAGCGTTCGCGCAGCGCACGGCGAAATCACCGAAGCTGCAACC  
TTCTCGAAAAAATCACCGCGACATACAACCATCCATACGTTGACGGCTCTCTTGCTC  
AGAAGGCTGTGGGCTACACATAGCCACAAAACGATCTAGAAAGTCTTGGAGCTCT

TCGTCATTTGAACTTGGCGTATGCTTTAACACTTGCCGTGCCTCACCCATAACTTGGT  
GCATCCGCTCTTTTCGACTGCGATAGTCCTCATCAGCGTATCCCATCGTTTCTACGAA  
GACCTCTTTACCGCGCGAGCACAAGCGGAAATCCGGCCGATAAGAGGTCTTGGTCG  
TCGGGCTGATTTGGTCGGTATAAGGCTTGATGATTGAGTAAGGGTCACCCTTTTTTTC  
CATCGCGTCCAATCGAGACACTAAGATCGCGAGCGTCTGGCGTTCTAAATCTGAGTC  
GACCAATGTCCAATTCCCGGAAGTGTTTCGCGGGATGAACATAGGCTTGAACATACT  
GGGTTTGGTCTCTCCGACGAGGCGGGCAACCAATCCAATGGCTAGGTAAGGGCCCA  
CAGTGCCTCGACCTGGGAACCGCACGCGCCCGCGCACCTCCCACTCATCGAACTTGC  
CTTGCACCGGGTGGACACTCGTCAAAAACACGCCGTTTGGACGTTTATCAACGTCGC  
ATAGGCCGATCACGAACCCATGCAATTCTAGATCTTTGGGCAAGCGCCCGTCTTTCT  
CGGCTCGGACGGCTTCCATGAAGACCGTATTCACTTGATGGAGGTTGGTGCCGATGA  
AAGGATGCGCGGACAGTGTTTTTTCGTCATCCATGAACAGGTTCTCTGCCGCAGCAC  
TAACGCACTTGGCGTCGGTGCTGATGTGTCGCTCTATCGCGGTAACGCGATCGCAGG  
CGCCTGCCTCTAACAAGGTAAACAGAACGCGGGCGAGCGTGGGCGTCCTTTTCGCTCT  
TAGAGCTGCCGTAACAGAGTGTCCCCCTGTTTTTCGGAGTCGTATTCGTCGGTTTTGT  
CTTTTTTAAAAAGCCCAACGAGCTCACAGGGTCTCTTTCCGCCAAGCTGTGACCTTTC  
GCTGCCTGTGGATCGCGATAGAACGGACATGTGTTCGGCGTGCATGCCCCGCACATG  
ATTGCGCACCAATGTCAGCGGATGGGATGACGAGACCGTGCGCATGGCAAACATCA  
CCGGGGATTGGGCACCAGGCAGACCATGACAATTGCACAGCAGCCATTGGTCCTTC  
TTAATCATATGATCAAGCAACTGGTAAGCTTTGGAACCCACCCGGGCAGGACCTGCA  
GCGGTGCCAAATGCCTTCTTCAGAGCCGCCACTTCATCAGCCGTCAAGGACGTTCCG  
GGCTTAGGGGACAAATTCGATCAAACCTTATCGACACGGAGCATAGGAAGCCTAGG  
AGGCATAGACATGCCGACCACTCTCTCAACTATGGTGCCTCGTCGTCAACATGTGCA  
CGGAAGCTCAAACCCTTCTTGAGGCAATTACATCTAACGATTGATTACTCCCTTTCTC  
CACAATGCGTGTGGCGTGACAAATTCCTCCCTGTCTGATATCGCCAAGATGCGCAG  
CGCACTATCCATGTATGTCTCGTGGAAAATCCGGATCGAAATGCAGAAGACTGGACA  
TACTCTGGGGCTCACCTTCAAGATAGAAGGGAATGCTGCAGCTACCCAGGCCCTTCC  
AAGGCCAACCTCGAACACTAACGCTCCTTGCACTGGGCAATAGCGAGCTGAACTC  
CACGGCCACTTATCTTTCTGATGAGTGTGCGCGCGTCCAAGCTGCTCAACCCACTGC  
ATCACGCAACGACGCGTTTTTGGACGAGCAGAAGAGTAAAGCTCAGCCAGCGACAT  
GAGACAAACCTGATGCCAGTGAAGACGCTCAACGTAACGGCACCATGCAGCCCAAA  
GCTCCGTCAATGAACTGTGACTCGATAGATTATTAAGCCACATCATGCGCCCGTCGC  
GTCGCAATGAGAACAGGACTATAGGAGTGGCGTCAGCAGATTGAAATATCCGGAGC  
TCCATGCCGATCCCCGAAAAATACTCTTTTCGCCATAACAAAATCCGTAACCGGCGTT  
GTCGCCTTGAAATTATCTGCTAGCAGAAGTCCGATTCTGTCGCATTGCGTTAACGCT  
ATATGATCCATAGGCACCCCGGATTAGAAATTAACCCGAAGGAGCATCCTGTCAAG  
CTAAGCGTCATGACCAGTCCTTGGACGCACACCTTTGTCAACAAAGATATGTCAGCG  
CCAAGTAAAACCGGGGCGACGAGCCTAGCCATCTGTGATCTCGCACAATTCTTCTC  
ATCACGCTGCAATTGGTGTGCGCCTCTGTAACCCCTAAGCGCCGGGATATCATGCCAA  
GCAAACCTACCAAGTGCTTTCCTTGATCTGAGTGCCTATACTGGCCTAGAAACAC

CGTTCGCATGAAGCTCTTGAATTGGTTGGAAGTGCATTACCCCCGGCGCATGGCTGG  
CGGAATGCTAACAGGAAGCCCCATGGACACTGTCCGATGACGATCCGAATCATATTT  
CTGACAGCCGGCCTTGCGGCCATTTTCTTCCCAACATTAAACATTGTGATGTCTTTGT  
CTGTGGACAAGACATTTAGCCTCTCGGACGCGGCAGGCATCGCGGCAGGCATTGCA  
GCCATTGCATCTACTTTCCTGGGAGCATCGAAAGAGAAAGAAAGTGTGCGACATGA  
CCGAGAGATCTTTGCGAAATTCCTGAGGGACTTACCTCACAAACCCAGCATTTCAGCT  
ACTCAAGGACCATGACTTCGGCGGAGACTATTACAAATCCCAGGTGCAACACTTGTT  
CGACTTTGTTTCGCGAATGGGACCGCCCAGAACTTGAGTTTCTGGATAAGAAAATCGA  
AAAGAAGCGAAAATCGCTTTATGATGCGGCACACAACCTTTTTGAAGACTTCATGCG  
GGAAACAGTCCCTAATGACCACAACCCAGAGATGAGCACAGTCTATCCCGGGAATC  
AGCGAGGAGGATCGCGACCAGATTCGATTAAACAAAGTGCCGCAACCTTGAACGCA  
AGCGCACGAAAGTTCGCACCGCAATACGATGAGTTCGTTTCGCTACACTCGCAGACG  
CCTGTCTATGGAGTCTTGACCCATGCCGATTTCCGCTTACTCAACGACCCTCAAGGG  
CGAATACGATGTAGTTCAGTTGCTCACATGGCTAAATCCCGGAAGCCCGACCAAGC  
CTGACCCACCCATGCATCGCAAGCGGACAGAGACTTCATCACTGGCGATGTTGTTT  
GCCCTGGTTGCGGCCTCGGAAGACCGACCGTTGTCGTCGCCGGCCGCTCGAAAACC  
AATCCTAAACGCTTTACAAGTCAGGCTCATTTCGCTTTCCGGAACATCTAGAGCTA  
TGCGAGTTCGAGACCGATGGCAGCACCTCATCCTTGATGACCATCTTGTCACTCTG  
AACTCGACCAACTCAGCTCTGACAAGACTGATTGGAGATTGGGTCTCTAAGGGCATC  
GAGCTTGGAATATTTGACCAACAAACCATGCGTGAAATGCGCCAATGGTTTCTTAAG  
ATCAGGCAAGACCATTCCTATCGTTGCGAGGTAGATCAAGACTTCATCGCGGAACCTC  
CTGAAGCTTCCTTATGACTACCTATCGCTGGCACCCAAGTTCACGCCGGCCATGGCA  
AAGCTTCCCAACTTCAATCCGAACGAGTTCGGGAACCAGAAGTTTATCGATGAGAA  
CCAAGACATCTACGCAGTCCTCAATCGCGATCGCCATGCTCTTCACGCCATGCGCCA  
GAATCAAAGCATCATCGTGGCACGCATCAAGCAGAGTGTGCGGCACATTGATTTTCGA  
CCCATCTGCAACTGAGCGGGAATATAAGCAAGTCAGACAACCTGGCCTACTTCATAGT  
AGGCCAGGAGCGGTTCGTTCAAATGGCCTCCTAAGCTTCTACAGGATGAGCGCAAAG  
TTTCTTACAGTCTGATATCTGCCTTCTGCGCCCTCCTCCTATTACAGCAACAGCGGAGA  
CATCAATGGAGCAATCGATGCCTATGCCAGAATCCGCAGCGCCGGCAATCCAGCAG  
ACCAACTGGCTGGAAACATCATTGGCCTCAATCCATTCTTTGACCATGGCATCTTGT  
CAGCCATCGCTATGGCTCACAAAGTCAAGAAGCTTCGGCAAAACGGTCTAGTCGTG  
GGAAGCAGGATCGACCAAATAAGAAAGGAGATATCCTCAGTTGTATTCCACGATA  
GGGCAACTCCCGTGGCCTCATGCTGTGCGCGGGTAAGGTGGCAGTTTTTCTGCACAAG  
TCACGGGCGTGAAAGATAGGAGAATACCAACACTGAGCAGACGAAAGCATGTCAAT  
ACTTTACATGCGCCACTCCGCCCTCGGGGTCTCTTAGGGGCTACAGAACATGCGTGC  
GCCGCGCGCTTGCTCATATCGGTGCACTCGTAATCTCTCCGGCCTGGCACAAGTTAC  
ATCCTCATGCCCTGGCGGAAGATGCGCGCTACAAGCGCACGCTACGAGATGAGTTC  
ATCGTCACCGGCTCTGCCGCATCGCTCTGCGCTACTCTCTTGCGCTCGTTGGATTGAA  
GCTCTCTGTGTTGCTTCGCTGCATCAACTCTGGCAATCGCCTCATCAAGCTTCGCTTC  
AATCGCTTCGTCTGCGATCAGGTCCCGCACATGATCTAAGTTCACTCGGCGAACCAG

AATATCCACCACTTCATCATGGCCATTTCTGAAGTGCCGTATGTAAGCCCAACTCGGG  
ATAAGCCGTCTTGTGCGCAAACCTCCAAGATCGACTTGACCATTCTGCATCGCCCTT  
CGTTGCTGCAGCGAACAGTGCTTTCTCGCCAAAGTCGCGAGGCGCATGGCCTGTTCT  
GACGATCGCCCAAAGCAGACTCCCCACCAACGTTGCATGTCCTTTGGCAGCAGCGA  
CGTTAAGTCCTAATGCGTAGGTGTCCTCGGGATCAGGAAGACCAGCTTCGATCAAGA  
ACTCAACGACCTCGGCATGGTTGTTCTCGGCTGCCGCTGCCAAGCCATGCAGCGCAC  
ATTGGATCTTCGATGAAAAAGGCAACAAATGCTTGACCGCTTCCAAGTGACCCTCCC  
GACACGCAGCGATCAGCGCTCGACTGCCCTGGGCTTTAGCATCTGAAAAACGACC  
AGCTGAAAGACCACATCAGCATGACCATGGCGCGCCGCTCATAACAGCGCCAGTGA  
GTCGTGTTGCAGAGGGCTGCACTCTTTGAGCAGTCGTTTGACGCACTCCGTGTGCC  
GTGCCTGGCAGCAAGCACCAATGCCTCGTCATTTTCTGCGTCGCAAAACTCCATGAG  
CTGCTCAACTGCCCCGACCGAACCCGCCTTGACAGCGACATCAAGCGGATAGACCG  
CAAATGATTTTCGATAACAGTGGCACCAGTTGATCAACCAAGCTCTCCTTACCACCGC  
TGATCGCCACATCAATGGCATAGCGTGCCGCAGCATCGCTATCGCCTTGAGCCTCAC  
AAAGTGACTGCACATACGCCTCGCTTCCTTGCTTCACTGCCTGTCTAATACTCTTTCT  
AATTGCCTGTTTCATTTTCGCCTCCTTCCATTCAATCTAAGGCCATCACGCCTTTCGTC  
AAGACCGCAGCGTGACAGCATCAGTCGGTTGGACAAGCCGAAAAAGGACTTACAGA  
TCGTGCATGTCAGGAACATGGTCCTCGTAGTCACACGCAATGAGCGTGCCGGCTTCG  
TCCTCGATACGTTTCGATCGCAAGGTCCTGACCCATTGTTTCGAACTCGAAGTCACTC  
TCGGCCACCGCATCGATATCGCACTTGGAAAGTGCTTCTTGGGGCGAATTCGCTTCA  
ATCGTTGCCCAGTGGACGACTTGGACGGTGCCGTTGATCTCGATGGTGTATTTATC  
TTGCTCTCCGTGCTTGGCGACGTGCCAAGCTTCGGAACGCAATCTATGCATCGCAGC  
CGCATCGCTAAAGGACGAAATCGCCACGATCCCTGAACATCCATTCATCCGCCGCCG  
ATAACGCCAGCGCCTGGATGCACCAGGCAGCCAATACGTAGGCGCTAAACGGGCTT  
CGTGTCTTCGTCTAACTCTTGGCGATCCAGCCATGCAATCTTGGATGCATAGACCGT  
CATCAGATGAGAGCGGTAGGCATTTTCGCCAATGCTTTTTTCTCGGCATTTGACCGCCA  
AGGCTTGATCGATGGTCAGGGCCAAGATCGTTGCGCCTTGCTGGAAAGCTTCTTCGA  
TCACACTCATATCGAGCCCAGTGATGCCCCGATGTGAGATCACGCTCTTGATCTTGC  
CGGCTGACGCGCGGATCACAATGAAGGGGACGCCCTTCCCCGTTTCGACCGAAATTG  
CCCGAGATCGGCTCTTGGATATGCTCTCGGGCTTTGGTGACTTGGGCATACCACGTC  
AAGAGTTCTACCTTAGCAATCGAGCGTGGCGTGCTCTTGCTAATCAGAAACGGATTG  
CCGTGCTCACGCTTGAATTGGTCGAATTGGCGTCTCGGGATGCCAAGGTAGAACTCC  
GCCATGGCTTGCGTGAAGCGCGTCGTGCTCGCTGAACGATCAAGTCGTTGCCTCAGG  
CCATCGAAATCACGGCTGGCGATGATGGCCTTGGCGCTCCACTCGTCGCGATGACTTC  
AAGTGCTGCACGGAAAAATCCGTCTTCGAAACTTTTCGCCTTGCTGATATTGGTCAT  
CCAAACCGTCCTTCGTTCAAGTCTCACTGCAAGCAACTTGACCGGAAGCTTTGCCA  
CTCACCAGCCTGACGACCCGTGGGCGATGGTGATGGGGCCGCAATAAAGCCTAACC  
TGTTTCGTGGAGGAAGCACAGCGAAAAAGCCATCCGCCGTCGTAGCGACCCAGTGCA  
CGGCGTCTTTGCTACCTATGGTGATCGCGAGTTGCATGTGAGCCATCACGACCAGCG  
CGTTGCTTTGTTTGACCACAAGTTCAACGAGTTCAAGCGGGAAGCCCGTTTCGCAACC

GATGAAGCGCGTGTGCACCCGCGTGGACAAACGAGTTGAGTGCCGCCCAAGAGTAT  
TTCTTGAACCTCCAAAAACGCCCCGAGTGGCTCGGCTGCCTGCTTCACCGTTTCCAGA  
GCTTGGAGCATCTTGGATAGCATGGGTAAACGAGCAGCCACGGACTCACTCGTCGG  
CGTCAGTTCTTCTTGTAAAGCAGGCCACCTCGGTATCGCTTGCGCAATAAAGGACCCA  
CACGGCGCGCACCAGCGCTTCGAACTGCGCTCGATGAACGACCAGGGTGGACGGCT  
CAGAACCGACTACGAGTAAGCAGCGACTCGCAACAGCGTGCTCAATCGAAAGCAGG  
CAAAGCGCGCGACAAACTTGCAGTCGATCACTTTGGTCAAACGGCGGAGCCGATGT  
GATGGGCGCCAATGCCTCCAACAGCTCATCAGAACCTTCAAAGAGCTTCTCAACCTG  
CTCAAACATCATGCCTCCCCAAGCATTGAAACAGTTGGATCGCATCCTGGCGCATCA  
ATAACTCCCTCCTTCGATTTCTCATTTGGATCTTGCCGTAATGGCGTAAGCAGCGGA  
AGAAGCTTGAAGACCGGACTCAAGCGTAGCGCCATATCTTTTGCAAGATCAGGCGC  
ACTGGGTGGTCTTCTGCTACCAACCGACGAAAGAGAGGGGAGGGCTACGACCACCAT  
CTTGCTGCAAGGCTGGTGTGCTGACGCCCCGCCGATCACCAGGTGATCCAGCACCCGG  
ATGTCGAGAAGTGCCAACGCTTGCGTCAAGCGATCGGTGACCTTGCGGTCGGCTTCG  
CTTGGCTCCGGATTGCCGCTTGGGTGATTGTGGAAAAGGATGACGGCAGCTGCGTTC  
AATTCCAGGGCGCGCTTGGCGACTACTCGGGAATGAATATCGCAGC

>CONTIG\_35\_length\_9530\_cov\_18.008508

CGAAGAGAAGTGGCTTTGTGCGGTAATGATCTACTCTGCGACACAGTAGGGCTTCAT  
AGGCTTGGTTAAAGCAGTCTTCAATTTGGATGCCAGGGATGCTGTTGAGGATATTCA  
ACGCTTGCCGAGCGGTTTCATGCTGCGCTTCTAACCAGTCTCAATCAGCTCCACTTC  
CTCATTTAAAATCTCTGCACCAATTGCCTGTTGCCCGAGCTAAGCGCATGACCTTGCC  
AGCTTGCCGAGTCAATGGGCTATATCGCGTATGGATGCGGTTTAGAACCTGCTGACT  
TGGCCTTTGGCCATGAGTATACAGTTGGTCATCAAAACGACGACTCTCATGCGGGGC  
AAAGCTCCCCTGCCCTCTCTCTTGTCTGATCACGAAGCGCTGCTTCATGACTGTGG  
CTGGCAGGCACATTATGGACTAGACGGCTTTCACGGGAAGATTGGCACTCTTTTAAA  
ATTTGAGCAAAGCGTCGATCCGCTGGCGAGACCTTTTCTCAAAGGCCACAGCTTTC  
TGATGGCGCTTGGCTTGATAGAATTCTCCCCGCGAAATGCGCTTTTTAGGTGCTCTG  
GTGAGTGCTCTGGCCTTCTCGTAATCGCCTTGCTTGAACGCATCTTGCGCTTGGGCTC  
TCAGTGTTCCGTGGTCCACTCGTGCTTCAACGCCGGCCATGATGAGATGCGCATTGA  
TGGTGGATGCGATCTTCCCACGAAGGATCTTCATCTCAGTGGCCCCCTGCCCTTGCC  
TTGCGTCTAACTCTGCACAGGCTCGCTCCCCTAGTCCATTGGCATCGACCTTTCTGGC  
TGAGATGAGAAGATGCACATGATGATTGCGCTGGTCCCCCTCTTCGACCAGGTGAGTG  
AACAGCCACCAGCACAGCAGCTTGATAGCGATCGACAAGAAGCTGGCCAAGTGCAA  
CCGCAAGCATTCTGCGCTGTGGAGCGTCTAAATTGTTGGGCAAGGAACTTCGACTT  
CCCTCGCCACCCGAGCATTGTGCTCTCGTTTCTTGCTGCTCATTAATATCCCAGAAGCT  
TCGAACATCGAGACACCATCTCGGTGCCCCATCGGGAGCAAGCATCTGTTGTGAGAT  
AACGCCCCGATCTTTTCCCATATTTGTGCGTCTGTTGTGAGTTGTATCCCGCAGATTG  
ATCCCTGCACGATAAGCAGCCGCTGCGACTGATGATTGACCTTTGCCACGACTAAAC  
GATTTGATACTGACATGATAAATTGCCATTAATTCCCGGTTGAGGTTGGTTGATAGT

GGGAGTATCAAAATGGCTAAATGCGCGTCCGTCTAGATGACAAGGCTCGTTGCGAA  
TTGGAGAGATATGTCACGGTGTTTTTGCCGTTATTCGCATGCGACCACGACTCATTC  
GTCTCGAAAGAGACGGCTTCTCATCGCGAAAGCGATGCCCACGGTTTTTTGCGAAGC  
AAATAACCATATGTGGGCTCTTGCCCCTCTCTTTTTGGGATATTTACCACAGGGATTA  
AAAGATATAAATAAAAAACATAGGCCGCAAGTTACCAATAACCGCTGGCAAGCCTC  
AAATAAAAATGAACGAAACCTGTACGAATTA AAAATGATTAGATCTCGAAAATACT  
TCCTAAGCAATTGCATTAAATAAAAAACCACAGACCACAACCAGAAGGCAGCTACA  
AAAAATGGAATGGCTTAAATTCTTAACCGGCGAAATCGCTACTGGCTCCATCATCGT  
TTTTCTGTTGGCAGCTGCATTTACATGCTGGCGCACAGGCTCTCTCCATCCCATCAAT  
ACCCGTGTGCTGCGTCTATTTATCAGCAAGGACGACATTGAAGACCCTGTCATCCGA  
AAGGATTTAGCAGACCCTCCGCACTTGCGGGATTTCGAATGGCACATCAAATTCGC  
GTCCAAACACTCAAAGACGCGAAGGCTCTCATTGGATTGCGGGACTTACACAATATC  
CCGCTAAAACTCATTGGACATGCAGGCTGGGCGTTTGACCTCAAACTCACGTCATC  
CACCCGAAGCGGGTTCAATTCTAAGTGGTGGTTGATTTTGCCATCTATCGCATTCGTG  
GGGTTTATTCTTCTCGCAGCCATCCTAGGCACGATTGCCACCCAGGACAGACTGTTA  
GTCACCTTAAAAGAGACAGATACGAACCTTTTTATCTCAGAAAATGAGGCGAAGAC  
TCTGGGGCTTATCTCAACCAAAAGCGACGTATTAACGATCGAACAGTGCAAAAACA  
CCGCCGACAAACAAGTCGTCCCTCCAACATTTCGATCCAAGAGACCTTAAAATTCTTT  
GCGACGTCTGGGCAGATCCCATTCTCAAATCGCATTTAGCAAAAGAAGTGCCTAAGC  
AACGTAATGCATCGCTGTTTCGCCTTCGTCATCTCACTATGGTGGCGCTTGGTTCTTCTA  
TACCATATTAGAGAGCTGATCTCTGCGAATATTCTCAAAGCCCTTCTTGAAGAGCG  
TCAAGTAAGCACAGGCGAATAGTGACGCTTCGGCGCTTGTGCCAGCGCTTCAAAC  
AAAGAGATGAGGAGGAACACCTCCTCATCAACACGACGCGCTTGAAAATCTAAAAT  
TGCAACTAGAAAAATTGACGGCTTATTTTAGATTTATGGAAAAAGTATTTCTAAATT  
GAAGACAGTTGTCGTGATTTTCATGCACATAACCCTCTGCACTTTGATAGTGTTGAA  
CGACACGCGGCCCTCTCAATACAGCAGGATCTAACGGATATTTAGCGTAAGGATTGT  
GAAAAATCTGCAATCCATCCGTTATTTTCTCCGAAGGCTTACCTATTGAGGCGCTCT  
GCGGATAAGGCCCTTTTGGTCCTCCCCAAGTTGTATTGATGAAGCCCAAAGCTGGAT  
GACTAGACATAGCAACCGCCTTTCCCCATGTTGCTGCACAGGAGAAAATAACGGCG  
CTGACTTCCTCCCATTTGGTCATCTAAGAAAATACCTAAATCAATGGTGGCTCCGTTG  
TCTTTATCGATTGAACCTAGTGCCACGCTGGGGGGACCGCTCGGATATAGGTGGGGC  
TCCCTCAAAAAGGCACTTTCATCAACGTAATCATTATAAAGGAGTGCACGGATGGG  
GCGGTCATATTGAAACTGAAAATCTGGCTGCTCGAAAGGTGCAACCGCAATAACAA  
ACGGCCTCCCTTTAACATGTGGCAGCTTTGAATAGGACTCGGTGTATTTGCGCGCTTT  
TTTTGAAAGCGCATTAGATAATCTGATCATTGCCTCTCTATTGAGAGGCCAAAAATT  
CTTGTCCAGCACCTCTTGCGTCATCGGTGCTGTTTTTTCCCATTCAGCGATAGAGCCG  
TTTGCAGCGTTTGCAGTCACCGCCTCCACAATGACTTCACCATTTGCAGTTATCAAAT  
GGAAATCTGGCGAAGCTTTTGTCCAATCCATTTTAAATCCATAGTCCTTAAAAACAC  
CATGGAGGTATATTTCCCAAAAAGACGAATTGAACGTTGTCTGAAATTCCTTGATGA  
ATTTTCCATCTCGATCAGGAAATCCCTCTGCCCAACTCTGGACAACTGCTCTTTCGCC

TACGCGAGAAGGCTTGATAACATTACGAAGTTAGAGTGTAGTTTGTCTAGCTGGAAC  
GACTGGACTAAAAAGATCCATTTTTTCATTTTCCTTTTTATTTGCTCGAAATGTGCCTT  
TTCCCCTTCAAGCTTAACAACAGCTCTTGCTGCTCACTATGCGTCAATTTGGAAAATT  
CTTGGATCATTTCTGCCAGTTCGTCTGTCTCTGCGTAGAGGTAGGCAAGCGAGACGC  
CAAGGGCGTCAGCCATCTTCTGAGCCGTCTCGCTATCGCACTCATGCACTGCCCCGT  
CGTATCGATTGATTCTGAACGCCTGCGACATCTTCTGGTAGTCCCATGAGCACTCCTA  
AGGCCTTTTGGCTGAGCCGAAGTGTCTTCCTCCGCTTCTTCATACGGGGCGGCGAAGA  
CGACACGAACACTGCGGGCGTTGGGAGAAGTCATGCCCCAAGGATGAACGTAAGCT  
ACGTTGCTCGTAAATTACGTTGCCCGTATCTTACGTTTAGCGTATCTTTTGCTTCATT  
GCAACCTTGGCGGTTGTCATACGCCTAAGGCAAGGACCTAACCATGTTGAAGCTTCG  
TGCTCCGCTCATCGTCTTGCTCATCACTGGCTTAGCAGCCTGTTTCGGGTGGGGGCGA  
GGAAGCATTTCTCCAATACGTCAAAGACAACAGCAACGACAAAAGCCAAGATCAGTG  
ATTTTGAGAGCAGCAAGTGCGCCAAAGCCGAGGGTGCACCGAGCTATGTCTGTGAT  
GTATCGGGCTAGGTCAAGGCCATGGAGCGGGACCTTGCCACCAAATGGATGGCGT  
CTACACGTTACCAAGGTGGGTGGTGCCTGGAAGATCACTGGCCGGGTCCAGTAATT  
CCTTCGCCGCTCTGCCCCCTGCCCTTACTCCCAGGACATCCAATGACTGTTGGCAC  
GTTTCTCTTCCTGCTTGTTCTGGGTGCATCGGTGCTGGTGGTCATCGGGATCAATCGA  
GCCTTCTAGTCCCGCTGCCAGCGGGAAATCTTTGGTCGGGAGTTTGAACGCTCCTAT  
TTTGATGGGCGAAGCGCTTTGGCGATCTCGATTGAGCGGTTCGCGGTTGAAGATCCGT  
GCCGGCAAAGCCGTCAAAATTTACCGCTGGTGGATGTTTCGCTCTTGGGAGAAGCATT  
GGCACAGCTCAAAGCGGCAAGGCACGATCACAGTCAGCATTCGAGATCTGGATCAT  
CCAGTCTGGACGATCCGCTTCAATAGCGAAGGTGAAATGAACCTCTGGTATGAGAT  
ATTGAATCAGGCAATCAATGAGGGCGCGAAGCTCTGATCGCTCGTTTTTGCGAAGTGC  
CAGGGACGGATTGACGAACAGAGCTTTGTGCGACGAATTAAGCGCGGGGAAAGAA  
ACGCGTATCGAAAACGAACCTTCTCTTCGTATACAGTTTTAACAGAAGTCATCTCAGA  
GTGCTTCGGATTAATCAAGAAGTTTTTCAGTCTGATCAATGATCGCACTCGGCACCCG  
CATCAGCAGGGTTGTATTTGATGCTAGCCAAGCATCTCCTTTTGCCCTACTGTCAGTA  
AGATTACTTTTCCAAGATGAAGCGAGATTGGGCACGGCTGCTTTTGAAATAGCGTCG  
TCCGGCACCTCTATGCCCCTAAGGACATAAGTGTGAGGAATTTTCATCTATACCCAAA  
TCTAGATGGACCAAAACCTCGACTAAGCTTCCCGGAGGCTGCATCGCTGTATACAAA  
ATACGATGTCCTTTGTTATGCCAGCGAGCGGACGCATAAAGTCCGCCATTGCCTGAT  
AAATCAGGATAGGAAGACAAGCGCCAAAGCTTCACGCAAACATGCCATGGGCAATT  
TGCATCAGTCGATTTTCAACCATTTTCAGCGCCTTGATCGGTATCGAGAAGCTTCATTG  
GCGGCTCGCCGTACCCAGCGTCTTTGACGGGCGCTCCAACCATTTTTGGGCCTTTTC  
CTTATCACCAAAGGTTTCTTCTGCTAGCGTGACAATACGGGAGAGGCGCACAAAGCCT  
GTCTGACTCGTCCGGTGCCAAGTTAGTTTTGGCGTTGATCTTTCGCTGAATCGTGGTT  
CTTGGCCCCACCACACTTACGATTGATTGCAAGTCATATCCAGCAGCAGAAAAACCT  
AAAATCGAAGTCGCAGGAAGTCCTTGCCGGACCATGCGTAGCACATCCGACTCACT  
CGAAAACCTCCGCGTTCAATAAAGAACCTTGACGTTTGATATCCATAGCACCTCCGAC  
CACATGGTCACAGTATGCGCTCATTGTTGGTCCGCAGTCAAGCGACTCTTGACTTAACG

GCCCCATAACTCTTCTCGATTCTTGCAGGGCGTCTTATCCCTAGGATCGTCTGTCAAC  
GGCAGTAGTTCCATGGCCCTACACCATGCGCGGAGGGGACGAACTTTGTGACTGCGT  
TTGCGCCTGGTCAAGGGTTTGTCTGCTCGATCTGCTGCTGAGCAAGGCGTTGATTGAT  
ATGTTCAAGTTGATTAAACGATTGCTCCACAGGCGTATTGGCTGCCTGGACAGTAGG  
CATATCCGCGCGCAGCATAGCTGGATCACTTGGTAATCCCTGGACGACAAATACGTT  
CTGAGCTGCTGTCAGTTTGTCTGGTTCGCGTTGTTTCAGAAGAACGTGGTCCACTCGTGT  
CAGCCC GTTGTCC TTTGCCAACGTAAGCAA ACTCGCCGTCATGCGCTCACTCGTGGC  
ATCGAAGGTTTCGTCCGTTTGTATGATCCAGCTCAGCGACCTTGCCTTTGATTTGCTGA  
TAGAGCGCGAAGTCTGGGTGGCCGTCATCCAATGGCGTTTTTTGACTGTTGCTCTCTT  
GACGAAGACTGCGCTCGATCTGCCGATCGTGCTGCCGTTTCGCTGGGCGTTTTTCCACT  
TCTCGATTTTCAGGCTCGCCCTTGATCGCGCCCGTGGCCGGATCACGCTCAATGTTGA  
CCCTTGCCCACTTGGCTTCGATGTCTGAGCTTGCCGTTGTCCGATTGCGGGTTTCATC  
CAAGATCCGCTCAGCCGTGAGCTGCGCCTCTTGCTCCCACATGTTCTTGGGAGCCCA  
CAGACCTTGTTGGTTGGCAGCCTTGTTAATCCGATCGATCAGAAATTCTTCGGGATC  
GCCACCTTGCTTCCGCGCAATACCATGGACAGACGCTTTGACCTCAAAGCTTTCCCA  
CTTCTTGGTCTCAGGGTTGATGCCAACAACATCGACACCGTGACCGGAATTGTTCTG  
GATAGCTACGAGATCCGTATAGCCTTTCCGCGCCAAGTCATGAGAGACGAACGCCT  
CACCGATATCGCCTACTTCATGATCTTTAAGGGCGGATAGTTCTCGTTTGCCGATGTG  
CGCTTCAATCGCCTTGTCAAAGGGCACATCGCCATCAAAAGCGGTGATGTCTTTCCG  
AGCTAGGTAGCCAAGCTCCTTAGGAGACAGCGCGCCACTTCTCAAAGAGCGTCGA  
GATTGCCAGTCTTTTGAAGACCATCGACCAGCTCGCCCAATTCACCTTGGCTGCGCT  
TCATGCCGGCCAAGCCATGGAACATCAGATCTGCGCCTTCAGCCGCCGCCCCACCCT  
TGGCTTGA ACTCGCTGAGCGTTGTGAGCAAGCTCAACAATCTCTGGGGCAAGCTCTT  
TTCTGGACTGCGTTTCAACGCGCCCTGTCATTCTGTCTGCGGCAGAGGCTTCTGCACC  
TTCTGCCGCCGCACTCCCCTGGGCGTGAACGCGCTGGCCATTGGTGGCGATCTCGCC  
GCCCAACTCCTTTGCGCTCTGGGCTTCAACACGCGCTGCAATCTTTCCTGCTGCTGGG  
GCAAGGTCTTCTGCGACATCAACCGCCTTGGCAACGTTGGCGAGCTTTGCAAGCTTG  
GTGGCAGGAACAAACGTGGCGATGATCTCAATCGCCGCTGCGCCCTTTGCTTCCCCC  
AAATACTCTTGCTCTTTGCCTTCCTTGGTTCGCTTCTCTAAACCCGCTTCCCACCTCGTT  
CCAAGCACCAACGGCTGCATGCTTGATATCACGCGGAACCTTGCTCGGATCTTCAAT  
CGCGTCGTTGGCATAGATCGACGCCGCACCGATCACCAAATTCCGGAAGTCGCGGT  
CGGTGCTGAATTGGTGAGTGA ACTTGGCTAGGTTCGACAGTGTACCAATCATCCCCA  
AGCCATGGGTGGTTGCACCCTTCATCGCTCCGTAGCTGTCCTGGGCATCTCCTGCCG  
CGCTCCCCGCAAGCCGGGCTGCCGCACGATCCAAGTAGCTGTTCTGGGAATTGTAGC  
GCGCTTCGCTGGCCCAGCTCCTGGCCGCTGCCAGGTTGTCGCTGACTTGCTTATCTGT  
CCAGCCCAATGCCTCGCTAGCCTTCGTAGAGGCTACGTTGTAACCAGCGGTCACTGG  
CTCTTCGATGTAGCGCTCGTAGTTCCGCTCGACCCACGACTCATTGACGTTTCGCTGC  
GTCCAACGCGGCACCAAAGCGCCTTGCTCAGCTGGTGCCAGACGCGCACTGATGG  
CATCGACCAAAGGTCCAACCTGTTTCGCGCCCCCTGCTCTGATGCATATGCAGGCGAAC  
GCATGATGTCGTTGACCACACCTTTTCGCATCCAGGCCGTCCATGGACTGATGGGAAT

AGATCAGGCGATAGGCCTGGTAAGCAGTTAGATCAACGTTGCCGTTGGCATCAGTTG  
CTTGGGCAAGCGCTGCAATGTCAGCGCTTCGGGTTTGGCGGGTTGCATCGTTCATGT  
CAGAGTCCTTCATTCATGAGTGGACGATCAGCGAAACTGCGGGTAGTCCCTGATCAG  
TCGCTCTTCAACGGCCTGAGCCAATGGGTGCGCTTCAATGGTGTCGATGTTGCGCAA  
GACTTTCCAGGGTTGATCGATCAACGAGTGATCGACTTCAAAATCCGGAAGATTGTG  
CCTGCGGCGCAGCGCTTGAATGGCGAGGAGTTCAGCCGGGAAGACGCGATCAATGG  
TGGCATCAAACCTCGAACCGCTGCTTGTCTGTGTTTTCTTTGCTTCGCGAGATGTGGAA  
GTCGGCCCGCATCTGCATGACCGCCTGAAACTTCACTTCGTCATCGGTCTTCCAATG  
TTCAAACACCGACCGATACTCAGGAATAAGTGGGCTGAGGGGAACGAAGCTCGTTG  
GGATGTTAAATTCGGTTGAGAAGAGAGCAACCAAAAAGGCATCAGATGTGCCGTTT  
TTGATCCTGCGCATTTCGGGCATTGCATTGATAGCTTGATCTTTCTCGGCCATTTCTGA  
TGAAGAGTTGAGCACAGGTTGACGCTTGATCCCACCATGAAAGCATCGTTGGACCG  
ACGGCCTTCATACCGTCTGAGAACTGCGTAGGCCAATTCCCAAGGTCTTGCCGCATG  
TCGCTATACATGCCATCCCAACGAAAGACCAAGGAACGTAGATGGACCGCCTGGCT  
GACTAGGGCAGGAAGTTTTTCGGTATCCAAGCGCAGAAACGCATCGCAACTGGCAA  
CATCGAAGAAGAGCGCAATACGTTGAGCTGCTGACCTGTTTTTGGATCTAGCTCTC  
CTGGCGCATCAAGGTATCGTCGGATCGCAGACTCATACCGCTCCGCACGCCCTTCGC  
GTTGGAAATTTTCGAGCCATTCTTGGCATTCCGTAGCCAATTTTGAAGGGATGGAT  
GATGAGTCAATGTCATGCTGATGCCAGTCCTTGATGGGTGCCACTCCGTTGGCCTCT  
TCGTGGTTCGGGGTAGCCAGTGATGTAAGCATCGCACTCATGTGCTACCTGCACCACC  
CCAATGCAGGCTAGGAGGGTGCGCACACGATGGAATCCGAATAGGGTGCCGCTGAT  
GGCGTAGCAATGGGCATTTTCAAACGAGATCAAGTGCTATCGCGCGCTCTACAAGTG  
GCGTTGGCCACAGGGATTTTCGCTGCCCATCCTGTGCTGGACGGGCGCGGTTCGCGTCG  
ACGTCCACCCAATTTTGAGTAGCGCCCCAGTTTGGAGTCCAATTCCCTACCCCGAGG  
AGATTGGACGTGAAGAAGCGCTTTACCGAGGAACAGATCATTGGCTTCCTGCGCGA  
AGCCGAAGCGGG

>CONTIG\_36\_length\_9417\_cov\_24.140258

CACGATCAGTCACTTGCCGGACCGCCTCGATCTTGAACTCATCCGTATATCGCTTGC  
TGCTCATAGACACCTCCGAATCGACTATTTTCCATGGCCTTGAGATGTCTAGGAAAC  
CCTGGGCGTATCAAAGGTTACGACATGACTCCTTTAAGGTTGGGATCAAAGATACG  
AAAGCTGACGCCACTGCCCTGATATCAGAGCCGCTGCGGCAGCATCGCTGGTGGG  
AAATATTTCGACGGATTTCGCGAGATACAGGATCACCGTCTACATCTACGGTGCCGAG  
GTAGTAGCCCGCAGCACTCTTTAAGACTTGAAGTTGAAGCAGCTTTCCGAGGTGTAT  
TAAGGCCAATTGGCCGTAGGGTTCGTCCTCGATGCTGGAGTTCATCATGGTGTTTTT  
CTGATAACGATAGAAATCAGCCACGTGCTATTGGCGTGTGGGAGACCCAGAGGTA  
GTAGAAAAGCATCGACGTCGCAGGGACGCTCGTCCGCGAATGATGCGAAGCGAACT  
GGCTGGGTCAACGCAGAGGATTCCACGGCGCAACCGGCTTGACCCTGGTTGCTGGC  
GTGATGCTGAATGAATCAGCGACGCATGGCGGAAATTAAGCAGACATGCTCATGTC  
GTCACCTGTTTAACGGTAACTGTGAATACCCGCTTTCAAGCGCCTGCTGCAGGCGCC

ATCCCAGCCAGGCCACGCAAGGCACAGCCATCGAATTGCCAATTGCTTTATAGCGA  
GGCGCGTCGGCTGCTAGCTTGCCGCGGTACGGCACTAACGTGTAATTGTCGGGCATA  
CCCTGGAGGCGCTCGCATTCCACCGGCATCAGCCGCCGAACCCGCCATTTTCGACCAG  
GCTGCCCCTCATCTTTCCAGGAGGCTCCATCGTGTATTGAAAGTAAGCCTCAATG  
CCGGGCTGCAAAATATGTCCTTTGTCGCTACCGCCAGTACTGGCGCGCAACGTGCGA  
GATATACCATCGCCCAATTCAGCGATGGAGCCGCCGACACGGCCACGGAGGGAAAC  
GCTCGCAATCATTGGTCGCCCCCTGACCAGGCTTTCCTCCACCAGTTGATAGAGAGCC  
GGTAACTTGACCATGCCCCGACTCCAGGCGCAGCTCACCACGCGAATTCTGTGCAA  
ACGCAATGCTTTGCGGCGCGAAAGTGGCGACAATCGGCACACCACGGCCGGAGCCA  
TCCTCACTGCAGCCTTTGCCGCCGTTGGCGGTATTGAGCGCATGAGCCAAGTGGCCG  
GTGAACGACTGTGCTGCGAAGGTCTCCACCTCGAAGTCGCACTTGTGGCCCCGGGCT  
GTCAGGCAGGCTGCCTTGTGATTGGACCGCTGGAATTCCCACCGCCGAAGCAGAC  
CGTTACCGACGCACTGGGATAAGAGCTGCTCAAGCCGTTGACGAAGTGGATTGCGC  
TGTCAGTACGGCCTGAAGCAACTCCGGCAGGCATTTGCCACGTTTGGCCGCCCTGCG  
CAGGATTCCCGCACAAAGCTATCGGACTCAAAAAGTACTTCTGCGGGATCGAGGTCGT  
ATCGACCACTTGCCACAAGAAACACACGGCGACGTCGTTGGGCGACGCCGAAATAT  
TGTGCGTCGAGTACCCGCCACGCGATGCGACGGCGGGGTCCAGACACACAACCTGC  
GTGCGTCCATTTTTTCCCTGCTGGTTCGAGCGCATGGCGTTCCCTGCCAGTGCACCC  
AGAAGGCATCCGAAGGCGTTAGAGCGGTCAGAGAGCACGCCTGGGACGTTTTTCCCA  
GACGATGACCGATGGAGGTTTCTGGTGTTCCTGACGGGTATGGTCGATGGCATCGGC  
AAGCTCCGTGTATTTAAGGGTCAAAGCGCCGCGTGGGTCTTGCAAGTCCAAGACGCGT  
GCCCCGCGACGCTGAACGTCTGGCATGGCGTGCCCCCAACGAGGATGTCAGGTGCAG  
GCACGAGCCCCGTGAGTACTTTATCGGCGATCTGTGTCATATCTCCGAGGTTTCGAA  
CGTCGGGGTAGTGATGAGCGAGCAAGGCATTCGGAAAGGGATCGATCTCCGAGAAC  
CAAGCCGGATGCCAACCAGCGGTTGCCAGGCCAACTCACGGCCTCGATTCCGCT  
GCATACACTGCCAAATTGAAGGGCTGTTTTCGTTCATGTCATATCACCTGTTTTGGTTG  
GGGCGAAATCGCCCCGTGGCCGCAAGACCGAATGATCGGCGGCGCGTAACGCGATGA  
AGGAAAATGACAAAGGTGCTGGAGGTATGGACCTCCAGCGCAGGACAGAGAAACC  
ACCTGTGGGCTGTGCGATGGACTGGCTGTCGTCAAAGCCGCCGCTGCATCAGCTATC  
GCACCCGACCCGTATCGTGGCGGGAGTCGGTATCGCCTGGCACACATCCGCGCACA  
AAAGGCGCCCGTTGTTTCACCGGCGGGCACCGGCGTAGAACACCGTCGTCCCCGAA  
GGGTCTCCTGGCCTCTTGACGCAAGAGGCCAGGAGACCCTTCGGATCACAGACTG  
CAATCACCGATCAAGAGGCCCGCAGAAAGCGGCCTGACACGAAAATACCTTCATCCC  
TCCAGCGGTGGGGACCGCTGGACGCATGCCGTTGCAGAAGGTGGAGGCATGTTGGG  
GTTGCCCCACTAGGTGCGGGGCCACGCCTGGCAACCGCTGGAGAGCGCGGTCTGG  
CAGGATGTTTGCGGCGTCAGTGCGCCTTGGGCGCGCTGCGCCGCTTACGTGGGGAGC  
CACGTTTTTGACCGGGTGACTCGACAGGCAACGTACCCTTGCACTCCGGGTACCGGC  
TACATGACCAGAAGACACCAGTCTTCCCAGTGCGCTGGCGCGTCGTAGCACCGCAC  
AGAGGGCAAGCCGGACCTTGGGGGACCCGAATAGACAATGTAGTTCTTCGGTACTG  
CTGCACCAGCTGAGCGACCCAGGCCGACTGCTTCTCGATGAAAGTGTCCAACGTCA

GTTGGCCGGTCTCGATCATGTCTGAGCGCCTGCTCCCAGACTGCTGTCTGCGCCAGGAT  
CAGCGATGGCAGCTGGTACTGCGTCAATCAACGTGAATGCGGGCTTCTGACGCGCGA  
ACGGATCTACCTCGCTTCACTAGGTAAGTGCCTTTAGCAATCCATTGACGATACTT  
GCGCGTGTGGCTTCGGTGCCAATGCCAACAGTGTCTTTGAGCTTTTGTTCAGACGC  
GGATCCGAGACCAGCTTCGCAACTCCCTTCATCGCTTTGACCAATTCTCCCTGGGTG  
TATGGCCGTGGCGGCAGCGTCTTGAGAGCTTTGCACTCAGCGCCTGTGACCTGACAA  
CTTAGCCCTGCGCGCAGTGGAGGCAGGATTTGGCTACGGGAAGAGATATCGTCTCCC  
GCCTCTTCAGGATCTGCTTTCGGCTCAGCTAGAACCAGATGCCAGCCTCTAACAAACG  
ATTTGTTTGCCTACGGCTCGAAGAATCAGGTCTGCACATGACAGCATGGCCGTCGTG  
CGGTCTGAATTCGTGATGTGGCAAAAAGTGCCTGAGGTAGTGAGCACGTATCAGCCC  
ATAGACTGCCAGCTCTTCTCGCTCATGGCCGACAAGTCCGTCGGCTCAAGTGTCTGG  
AATGATGCCGTGATGCGCGGTAACCTTGCCGTCATTCCATGCACGAGACCTTTGCGT  
GCGATCAAGCTGATCAACTACGGATTTAAGAGTGGGATCAGATTTGAGCAAGCTGT  
CCAGGACCGTGGATATCTCGGTGAACATGTTCTCGGGAAGATAGCCGGAGTCTGAG  
CGTGGATAGGTCTGCTGGCTTTATGTGTTTCATAAAGCGACTGTGCAATGTCTAGCGTT  
TCTTGACATCCAGACCAAATTGCTTCGAGCACACTTCCTGCAAAGTGCTCAGATCG  
AACGGTAAAGGTGGGCCTTCTCGGACTCGCTCGGTCTCAACCGCCTGGACCTGAACT  
GCGCCGGCGGCACGAATTCGTTTCAGTTGCCTGGCGGGCAATGCTCTCTTGAGGCAT  
CGGCCAGCATCGTCCGTAGCGGACTGCGGAGGAAGCCAAATTGCGAAAAATTGCTG  
GGCCTCACTGGATAGTCCGACTTCCACTGTCCAGTATGGAACAGACACGAAATGAG  
CAATTTCCCGGTCTCGATCAACGACCAGCCGCAATGTGGGAGTCTGAACACGTCCGA  
CGGAAAGCACGCCTTCATAGCCAGCCTGCCTACCTAACACGGTGAACAGGCGGGCTG  
AGGTTTCATGCCAATCAGCCAATCTGCACGCGAGCGTGCCAAGGCTGAGAAGTACAT  
TGGAAGCGTCTCGCTTGAAGGCTTGAGCGCACCCAGCGCCTTGCGGATAGATGCGTC  
ATTTAAGGCGGACAGCCAGAGACGCTGGATCTTCCCGCGATAACCGCACAGCTCAA  
TGATTTTCGCGGGCGATCAATTCGCCTTCACGGTCGGCATCGGTTGCGATGACTAGTT  
CGGTTGCTTTGCCAAGCAGTTGCTTGACGACTTTGAATTCCGAAGCGGTCTTGGGTTT  
GACCTCAACACGCCATCGCTCAGGAGCAATAGGTAGCTGCTCTAGGGACCAATGCT  
TGAAGTGTACACCGTAGGCTTCGGGTGGAGCGGCTTCTACTAGATGTCCGATGCACC  
AAGTGACTGTGACACCAGAACCAGTGAAGCACCCATTCCCACGCTGTGTCTCGCGCCC  
AGGATTCGTCTATATCTTTACCCTGAGAGGGCTTCTCGCAAAGAAATAGCCGCATA  
CCGCTCTACCCGAATGACGTTGCTGAAGTTCATGTGCAACAGCATGTCTGGGACGGAT  
TTAAGCGGGCAGCAAAGAAGCAGAAATGCAGCATGACCAGCTTGTTGAGTCGCACT  
CCCCGCGGACTTGGCTCACGCGGTTTTGAATGCCATATCGATGTTTTTTAGCTCAACA  
GCTGGCGTCTTGGTCAATCCATTGACGCTGAGTAGTGATACGTTGCTTTGCATTGGC  
GCTAACTTGATGCTGATATGTTTCTGATCATGCGCGGCGCGTATCAGAATTTAGT  
CCAGTTCGGCGGTTTCGGCCGTGACGACTGCATCGGCCATCAAAGTATTCTGATAGTC  
AATGAAAGCCATGCTCTCATCCGGGATTGCTCCGACAACCACAGGGTCGTCTGCTGAC  
ATCTTCGATGGTCGGTGACAGGCCGCGCTTCAACCGGCTGTCTGCTCGCACGGTTCAC  
AAGATAGCGTTTGCGCCATGCTTCACCCTGCGCCCGCTTCCCCTCTGCCTCCATGCTT

CCTGTGTACTTCATGAGCCACATGTGCATGTAGCGCTGCCGTTGTTGCTGTGCAGC  
AGCACAAGATCGTGAAAGCGTTGGTAGAACGCTTCATCATGACCACAATCCAGGCT  
ATCGCCCTCATGAGCAATCTCGTGCTCAATCAGTGAAAAAATATACGCTGCTGTTCT  
GACCGGGGATGATTTGAGCCGCTTCACGATGGTGACATCGACGGCGATGTAGCTACT  
GCCGTCGGTCCATGCCTCGGCAACGTTGGATTGACCAAGCAGAATGTGAAGTGATTT  
GCCCTCACGGACCTGGCCGCCGTAAACAGGCCGCCCGCCCCCGTGCACAGGGCGACA  
TAGTGGTGCAAGCACCAGCGCAACGCAGTCCATGCACGACGTGTCTCACGATCAAG  
CGCATCTTTCTCCGTAAGGATGCGCGTCCGCTCCACGAACGCTTCTCGCAATGTGCA  
AAATGCCAGCAGTTGCGGGATATAGAGAGCGTTTATTCCCCAGTACTGAGCGCCGTT  
CAGCTCAATGTCCAGCCTAAGATTGTCGTGGATACGAGAGATACAGTCAGCAAACCT  
CTTGGGCGCTATAGCACCCGAAACGATTAAGGGTGACGGAATGCACGATCACGGCA  
ATTCTTCACGAGCGATAGCTTCCCCCTTTGGCACGTCGAAACCGCTTTCAACAACCT  
GCAAACCTGCCGCCATGACGCTTGCCATGGCTGTAGCGGCATTTGCGCAAGAAATCC  
TCCATTGAAATGTGCCGCTTGCCAGGAAGAAGCGTCACGACTTCTTCTTGAATAG  
GTTTGCACAATGCCAGCGTCACCGGAAAGGAGTGCCCGAGCAGACTTCTCACGGCG  
CGCCTCTGTCTTGCGATGATTGCCGAGGCGAGAGGCAATCTGATCAGCCATCTGACC  
AAACTGCTTGGCAATAGCCTTCCATACCGGGCAAGTCTTGCGCAGGATTTCTGTGCG  
GGAAACATTCAATCCAATAGCTTTCTTAGACACGATGAGACCACCTGCGCCCCATAC  
ATGTCCCGAGTCGTGGCGCACCAAGTACGCCCTGGTTGTAGATGGCGACGGCGCCATC  
GGCTTTGACCCTGTACCAGGCGAACTCGTCTTCAGCATCCCAGCGCTCGCCGTGAGG  
GTCGCGGGTGATGCGATTCCCATTTAGTTCAACGCATACCGGGGTGTAACGCATAA  
ATCCCGTATTTCTGAAGGGTCGACATCAGCTCGACCTCGCTCAGGGGCTTCATACCA  
GTCGCCCTTGATCGCACAGCCGGGTGAATGAGCCTGTACCTCGTCTAGATCGTAGTG  
GTAACCCATGACCCGTGTATTGACGGTCATCTGCCAAACATTGGAGTGCCAGGTTGT  
GGACGCGTGGGCCATGATTTGGCCGCGCCCAAGGCGGAAGCAGCCATAGGTTGCAT  
CGCCCTCTTCGTGCGGCGTTCCAAACCGGCCGAAGTAGCGAATGACATCTTCGCGGC  
TCGCAAAGCCTTGACCGTCGTCATGGCACGAGAAGCCCGTGCGTGAAATCGATAGTT  
GAACGTTACTGGCTTTGGCATCCACTGAGTTCATCAGCAACTCGATGATGGCTTTGC  
CGATCGAGCCTGCCTGACTGTAGATGATGTGATGGATGATCTGTGGGTCGAGTTCAA  
ACGGTAGGCGCATGGGGCCTCCTTGGTTCACTGAAGCAGGATTCGGATCAACGCCTC  
TCAGCCGCTAGCAATTGCTGGGGCACTGCTAGAGCATCTCTCAGCAAGGGTGCCGCC  
CAAATGCCGATTCAGGGTGTGGCGGGTTCCGAATCGCCATTGGCCGGTTTCTGGCTG  
AGCGTCACCGAGGCTAAGCGGAAGGGAAGAATGCCGACACGCCGAGCTTCGATCTT  
GAAGGTGGTGCGTTCGTTTTCTGTCGCGCATCCTCCCATTTCGTCTTTAACGGTCCGGCCC  
TCTACCAGAACCCGCATGCCCTTCTGATACAAATCCTTCCAGTGCTCGGCATCGCGG  
TGCCAGAGCTCCACCGGAGCCCAGAAGCCGCCACGGTCCTCGAACGTGCCGTCTTTC  
TTAGGCACCGGGTTATCGAAATAAATGTTACGCCGTAACAGCCGGTTCGGCTCATCG  
TTGCCATTTGGAAACTCGCGAAACTCTGGGATCGATCCGATATTGCCTTCGCCAGAG  
AAATGGGTGCTCATGGTGCTATCTCCGTGGTGGTGAAAAAACCGCTTGGCACAGCG  
TTGGGGCAGGGAATAAATGGATAGGTCAGGCCTGGGGCGGCATCCCGGAACGAGCA

G TTCCTTTGGCGCCCGCGACTCGGTGCAGGAAGGTGGACTCGGCCTGGCTCATCTTG  
TTGGCGCACTCCAGAGCCTGACGACCTAAGGTGTGCATCAAGCTGATCTGCATGTTG  
AGTACGAGGCGTTGCTGTTTCGATGGCATACAAATCGGCTATCAGGCTTGCCGGCGTG  
GCATCACTGAGAACGAGGTCTTGCCATAGAGCAACCCCCATCGCGGAGCGGTCTGG  
CCTGCGCCAGCGCAGAAAGGTCTGCTGCCTGCGCCAGTCTTCTGCTGGGCCAGTTCCAC  
CGGCAACAGATGGAAGGGATGTCCGGCTGCCTGTTGCAGCACGCGTCGTTGTGCCA  
GGATGATCAACTGATCCCTTTGCGCCAAGCATTGGCTGGCCACACATCGAGAGCCC  
CTTTACCTTTTAAAAGGCTTTTAAAAGGCCTTTTAGATAGGGAGCCTGTTCCAGCCGGA  
TGAAGTCAGTCTGTTCCAAGGGATGGAAGCGCGTGGGTTGATACAGATGCTGGTCG  
ATCATTCTGGCTCATCCTCGTCGGCCACGACCGACTCTGGCGACACCGGCGCATCGT  
CGGTGCTTCGGTGACGGTCGCAGACGTACTTGATGTTGCACGCGATTGCAGGCCGCG  
GGCGAATGATCGGGGGAGCGAAACGCGAGCGTCGTACGCCTTCCAACACGTCCTGC  
GGCAGCTCTCCGTA CTCTCCAACGCAGTGCAGAGCCGCCGCATTCTTGGCAGCGAAA  
TCGTCTCGCGTGGTGCCGCTGAAACGGTATTGTTGAGCCAGTGAGAAAAGACTGCGC  
AGCGCGTGAGCGCCTTCGTTGAGCCAGCGTTCCAATGTGCTGCGGTGATCAGCGCG  
GTGTGATGCGCCAAGATGAGCTTGCGAGCAATGTCGTCGTAGTCAGCCAGCAGGTA  
AACCGCCGCGAACCCCAACTGGGCGTTGACGAACAAGGGCAGTTTGACGGGTTGGA  
CGTTGAGGTTTTTCGCCAAGACTGAGCGCCGTAGGTACGCCAGCTAAAGACTGGTCA  
ACCTGTTTCGCGCAGGTTTTTGCAAGGTGGCTTTGGTCTGCTCCAGCTTCTCTTCAATGC  
GTAACATCCACCAGTCCGAGTAGGGATCGTCCTGTTTCAGCACCGCGCTTCATCTTGT  
TCATGACAGATACGTAGCCGTTCAAGCCGACGATAGCCGCCCGTCCTTCTGAAGCGG  
CGCGACCATGCCAGATGCGCGAAGCGTGATGCGTGTGCAGCGTTAGCGACATCGCG  
CTGCGTAGGGTGCCAAGATTCAGCTGCAGTGATTTCAGTAGCCATAGTGAAGACTCGC  
TG TAGATAACGAGCCATCAGCTTTCCCGCGTTGATGAGGGGCGTCAGTCAACAAAC  
GGA ACTCACCGCCCTCCAGTTTCGCGCGCACCACTGCATGTAGCTATCCCCTGGGGA  
TAGCTACATGCGTCATTCAAGCTGCGCTGATCTTGAGCTGCCTGAGGTAGGCTGTGCG  
CTTCTACGGGTATTTGCAGGGGGGAAATGGATGAAAAGCAGTGTTGAGCTGGTAGTC  
AACGGTACGCAGGTGGCACACGTAGATGCGTTGCTGGATTTGCTCGAACGCGCGGA  
GCACCTGGATTGCATGGTCGCATTCGCTAAATCGTCTGCCTTGAAGTCCCTGCTAAA  
GCCGCTGACGAAGGCACTAGAGCGGGGCATGACGGCAAGGTTTGAGTCGGGCTGA  
GCTTTTCATCTGACCGAGCCAGCAATGCTGCGCAAGCTCATGTCACTGAGGAAGGAG  
CACCAGTTGGCGTTGTATTTAAGTGATACAAAAGCGACGTTCCATCCAAAGATCTAC  
CTGATTAGCCCCGACTCTCAGCCATGAAAATTGCTCGCTGCACGTAAAACCGGCTCT  
GGGCATGGTGTGGATTGCATCATGGCCGTGGCAAGTCGTGGCAGCATCTCGCGCAA  
GCGGAATCGACGA

>CONTIG\_37\_length\_9377\_cov\_10.948649

GGATACGGCACTGGGGGAGCTGACGCGACACCTGGCGCAGGAACGCTCGGCGCAGC  
GAAGCCGCGACCTTGAAGATAGGCTGCCTCCGGCGATAGTGCTTCCCCGCACTCCGT  
TTTAGAGGTTCCGCCGTCCGCGGCGAAGCTGTCTCTTTGCTCATTAGAAGCTTATGG

AGAAACTACCGGCGGCTGGGCGCCAGCGCTTGTGTCCAGTCGCCGAGGCCGATCCC  
GCCACCTGTTCAAGCTGGGCATCAAGGCGTGCGATGGTGGCTGGGAGGGGCACCAC  
CGCGTCCGGGATACGGTCATCGGCGCCTTGAAGGCGGCTTGCTCCACCTGGAGATGC  
GGGAGAAATACACCGCACATGAGCTGTTCGACCGGCAGGTGCACGCCTATGTTTAT  
GAGACGGAGCTTAGTCCGGGGGGCGTTGGCTGAGGTATGCCACCCCGCTCTGAGTA  
GTCGATAGAGGTCCAGGGAGACAAGCTAATAGCTGTATTGACAATAGTGCCAACTT  
GGAGCATTGTATTGGCATAGTTGGCTATAGCCAATCAGTGGAGATTGAGATGAGCA  
CCCGTAAGGAAATCAATGCCTTTTTTCGGTCTGGAGGCCGAGCGGGAAGTGTCTAGCC  
TTGTTCACTTTCAGATTTTCAGTGCCGGCCTCTCGGCTAGCGACGCTTTCGTCTTTGAC  
TGAAGCGCTGGAAAAAACTGCTCATTGTTGGTGTGCAGGCTGATCCTACACCGTTGCT  
GCGTCGAGCTGAGCAAGTGGCTGAGGCCGCTCGTGGAAGCGCTACTCCTAACGAGT  
CGCTTTTGCTCGAGCGCATTGCACAAAGGCGCTCTATGCAAGCCATTATTGAGGCTG  
ACGAGTGGCTAACGGCTGAGCAGATTAATGAAATGCAAACCTCGCCTCCAGCGAAC  
AAAAATCATCCTGCCAGTGATTGGAAGAGGCGCGGGCGGATTTACTCCGTGGATAT  
GGATGGAAAGGATCACTATGCAAGTTATCAGTTTGATGTGATGGGGCGTCCTCTTCC  
TATAATCAAGGATATTCTCGCTGCTCTCGGGTCTATTCCGGATTCTTGGTCAATTGCC  
TCATGGTTTTCACTACCCCAATGGGTGGATTGCCGGCCGAAATGGGAGCGCGGTGGC  
GCCAAAGGAAGCTCTGGATCGGCCTGCTGACGTCATCAAGGCGGCAAGCAAGCGGT  
TGCGCAGTTATCAAGCCTGAGGAGTTTCTCGAATGAAATCGCCAGGAGCGGCGGAA  
AATTTCAATTTGTCGATTCTTGATGACGAAGATCCAGAAGTCTGGTATCACGTCTAT  
GCTACGCACTCCCACAGCAATACGGCCTTCACCTTTTCACAAGGGTGGGGGGATACT  
CGCTTTGCCCCCTATAAATCTTCCGGACGGCTCCGCTGCGCATACTTATTATGTTGCTT  
CAACTGCGAGAGCAGCCATCATGGAGTCTGTTCTTCACGATGTTCTCTAAGTCCGC  
CAGGTGAACTTTCTGTATCAAGTTTGACGGGCTATCATCTAGTTCAGTTGCGTCTAGT  
CAATCCGCTTCGCTATGTGAGTTTTTCACACTCCATTTTTTACCGGCTTTGGGCTTGACG  
CGCACGGAGCTGATTGAAAGCATACCCGCGTTATACGGAGAAACTAGGCCTTGGGC  
TGAAGCGGCGCTTACACAGCGGCTAGATGCTCAAGCTATAGGCTATGGCTCAAGAC  
TCCATGATTTCGTCTCGCTGCTTAATGTTGGTTGAGCAGCGTTTGTGGAATCCTCCATT  
TCAGGTGCTTAGTGAAAATTGCCTTGCCGTCGAACCATTACGCCGAAAGGTTTTAGA  
TTTTGCCCGTCAACTAGGTATATCCGAAACACCCTAGCCTAGCGCGCTCTGGTACCA  
CCATTAGCGATGACTGCTGTTGGTGATCCCCTCGGCGAATTTGCCGATAGATATCAT  
TATTTCAATAATGATTGGTATGGTGGAGTTTCTAATTATTCGTCACTTTGTTGAAGAGA  
GGTAGTCACCATTTTTCCACAGAGATTCTGCTGCCCCTTCCTGGGAGAGCTCCTTATTG  
CGCCCTTGGCCCAAAAACATGCCTAGGTTTCGTCAGATAAAGTGTATGGTTCGGCGTGG  
GAGGGCGCCGCTGCCTACAAGCAGTGGAAGCTGGTTACCCGGACGAGAAGTTTCC  
GGGCTCACGCGTTCTTTCCGCAGGCGGCTGGCCTCATCTACTCAGCTGTTTTGCGCCT  
GAGTTCCGTTTGGGTTTGTGTGGCAAAGCGGATAGCTAGAGCAAGACTTGAATGGG  
CCATGCGGCCCCGTTCTGTCTACGAATACTCCAATCTTGCACACGGGGCAGCGCTCT  
TCTTTAACGGCTGTCCCTGCCAAGGTTGTGACTTGGACGGCCCCCTCCTTGACCAAC  
TCATCTAAGAAAGCGGACTGCTTCCCGCGCACGCTGAACATCGCTACAGTGCGTCGA

GCACGGGTCAGCGCGACGTAAAACAATCGCCGTTCTTCGCCCAACGGATAGGGATC  
TTCCGCAGGCATGACTAGCGACAGAAGCGGGTCATCTGATCGCAAGCTTGGAAGC  
CGCGGTGCACCATCCCCGGAAGGATGACATAGTCGGCTTCAGTCCCTTTAGATTTAT  
GAGCCGTTAGGAACTTTACCTCCATGGTCTCGCCAAAAGCGGCTTCCCACTCTGGTG  
GCACTGTGCTCTTGTCTTTCTTATAACGGCCTAGGACGAAGACCGATACTTTTCCTTC  
CCTGCCAAGTGGGAGCTCTCCCGAAAGAAGCTTTGTATGGAGCGCGGATAGGTAAT  
CTAGGATGCCATCTTGAATCAGGTCACGGCGGGCTACCTGAAATGCCTGAAGCACG  
GGTCCTTGGGTTGGCGTGACGGAGTGAACCTCGCTTTTGGATCTGAGCTGGATTCTTG  
ACGACGAAGCGGCTGGATACGTCGCAAAGCTCCTGAGGACAACGAAAGGTTTGCTC  
TAGCTTGAGAACTTGGCCTTGGCCAAAAAATTCACGGAACCCGGTCATAACAGACA  
CGTCGGCACCAAGCAAACCGATTGATGGATTGCCAATCGTCACCGACTGCGAACAGA  
TACTTGCCCGGTTGGCTGATCAATGCGCGGCAGAGACGGGCACGAGCCCGAGATGC  
ATCCTGAAACTCGTCCGCCATGACTAGATCATATGGTGACTGAAAACGACCCTGCTC  
CAAGAGACTGGCCGCCATGTTACAGCATGTCCTCAAAGTCGATCGCCTTCTCGTCGGC  
CAGTGCCGTATCCCAAGCTTCAAAGACTGGACCGGCTATCTCTAAGAAACGCCGAT  
GGCGCTCCTTGAAGTGATCCTCGGGCATCTGACGAAGCCGCTCGCTCAAATCTCTCA  
TCGTCAAACAGTTGCTCTTCGCGTGCGCGATGAACGTGCGCATCAGGCCCGCCAAGT  
CGTCGTGGGGCATGGGCTTGGCGCCATCGCTTGGAAGAGGACGGTCTGGGTTTCGGG  
TCCAGTTCTATCCCCGACTCGGTCAGCTTTGCGGCCAGTAAGCCGAACGCCTGGCCG  
CTGCGGAGGCCGTGTGAGGTGGTCTCGAACAATGTGGTGCCGCGCCGCTCATGTTCC  
TGACGCTTCCAATCCAGGCTCTGCATGTAACCACGGAAATGCTTCGGGGCTTGGCCC  
TGTGCGTCTAGGGCTAAGTGTTTCGTGGTAAAGGGCGGCGTCCGGGTAGTAGAAGTCT  
GGGTAGTATTGGCGATGGGTGCGCGTAGCCGTGTCGAACTCATACGGCCGCTCGTAT  
TCATAGGTCACGCCGTTGTAGAAGAGCCAGTCTGCGATGACGCATTCTTCCATGCTC  
TGGACGCGGTCCCCCTTCAAGGTGCGTAGGAATGGCTTGCCATCAGGGCCATAGCC  
ATCGGCCATCATCTCCGCGCCGAGCGGAGGTAGGTGCGGGCCAAACACCAAGCGGA  
ACATGTCCCATTGGGAGCGGAATTCTGATGAGCGATCTTTTAGGTCCTCTACCAGCT  
CGGTACGTTTGCTTAGACCCTTCGCAGGGTCTCTGGCCCACTTCGGAACGCTTAGCTT  
TCGTCCAGTCGCTTCGCCGATGATGGCTAGGCCCAGGGCGTGGAACGTCTTGGCCTC  
CACTTCTGTATCGAGCATCCCTAAGCGTTCAAAGACCGGGCCGCTCGTTCCCTAAG  
CTCGGTAGCCGCATCCGTATTGAATGCCAGCATCACCATGCGCTGGGGTTTCGATGAA  
CCCTCGGGTGATGGCGTAAGCGGCCTTAGCCACCATGGTTCGACGTTTTGCCGGAACC  
CGCAGACGCTACGACCTGGACTCGGTTGTCGAAGCAAATCACAGCCCGAGCCTGCT  
CCTCGGTCAGGGGCTTACTTTCAACCCGGTCCAGCAGGTCTTTGGCTAGCGTGAGTT  
CTCGGGTCGCCATCGATTTGTTGGCATCCTCCCAAAGGGCGGGCCAGTCCATCTTCC  
ACTGGTGGAGATTATCAATGGCTTCTAGGTGGGAAGGCGAGCGCACGTCGTCATGC  
ACCTCCTCATCCAAAAAGAGTGGCTCCAGCTCGGCGGAGGGCAGCGGCAGCTCAGG  
TCGCTCTTCCAGCACCGACTGTTGCTGCTCGTGTGTAATCCATCGTCGTTCCAACCTG  
CCCTCGTTGATCAACGAGCGTGCAGAGCCAAGCCAGGGACGGATGAGACCCAACGC  
GGAGTCGAACAAGGCTTTCCGTTTCGCGCTTACGTGCTCAAACAGCATGTCCTTGAT

CGCAGACGACAACAGCGCGCCCTGCGCATTCGGGAGACCATCACCGGTCAGCCAAG  
GCCCCGCATCCAGTTCCACCTCTACTCGGGACCAAAGCACGCCTGGAACCTACTTGGA  
TGCGATGCCCATCGTCTACGAAGGTTCCGGTAACGTTTGCCAGCCACGCTGATGTCCG  
CGTGGTCGCCGTCCAAGTGAAGCCACCAGTGAGCAGACCGAGTCAAAAACCGACCC  
CAACCAGAGGGGCGCCAATCGTGTGCCATCCGAACCTATTCCTACCTGCAAATGCGC  
GGGCCAGCAGCAACACACAGCTGACCCAATGACTGAGCCATTATTTTAGTTGTAATG  
GCAGCTGGGTGGGCTGTTGCTTTCCAGGTAGAGCAAACATGTCTTAGCCACCTCGG  
AGTGATTTGCTACATCGCGTCCGATTGCGGCGACTCTCTCTCCTAGCAAGATGTTGA  
TGCTTTTCGTCTTGTCGAGCAGACGCCAACCCCTCTTCGGTTGATTTAGGGGTGAGGT  
GATAAAGGACTGGCGTGTCCAGAGCTGAGCAAACGACGCTGACTTGGTAGGTCTCG  
GGATGTTTCGCGAAGCATCCGATACTCATTGGGTGTCAGCTCAAAGTAAATCGTGTCA  
GCAGATACACCCTTCACCTCGATCTTATGTGTCTTCGCATCACGGCTGACCTCTAAGT  
CCCAACCGAGGTTCTCCTTCTCCACACTCTTCACTGTGTAATCGAGGGACTCGTAAT  
GCTCAGAGACGGCATCGATAGCAGCCGCTTCCACTAGCGCGTTCATGGCAGCGTCTG  
GCGTCCTGCGCCTTTTGTGTTTCTGCGAGCCGTGTCTTCTAGATGTTCTGTCTGATGG  
AAGCGCGACGCCATCCGTGGCTTCCATCAAGGTCCCTTAACCTTCTTAATGAGAGCAGG  
AACTGCCGGATTCTCAGAGCGCTCTGGATACCAAACGTTGGACTGACCTGCGTAGCC  
TGCGCCATCCATGGGGGCATAAGGAATGAAGAAGGTGCGCTGTTCCCTCTTTCAATAG  
GGTGGCGTTGGCTGCGTCAGTAGAACAGAGGTAATGGCGTTGTTCTGAAGTGCATGC  
CGGGAATAGTGCCGCGGCGCTTCAAATACTGCTTGTGAAAAACGGTGGCATTTCGAT  
ACCAGCCAACGACGACTTGACCACGGTCCCTTGTGACGAGCCATGAACGCCACGTCG  
ACGCCATGGAGCGCGTCGCCTCGCTCCCAGTGTTGTTTCGGGAGCGAGATTGCGTAGA  
TCGATGCCGGCACTATGACGGCTCATCGCATAGCCGTAGCAAGTTCCTCGGCTGGGT  
TTGAAGTTATAGATCTCAGCGCCAACCCCGTTGTGCGCAATGTAGCTGCCGCCTCCG  
CTGATGTTCCCGGGACCATCGTAACGCTCCATGTAGCCGACCCTCAAAATGAGCAGC  
GGACGCTTGGATTTTCGCGTTGAGACCATCGTTGACTTCCTTTGTCTTTGAGGCGTCG  
TGTAACCAACGCCATGGATGAAAGCGTGTTATCGACCGATCGTCAGTGATGTTGAGC  
CTGAAAGGTTTAACACTGCTAACTGGCGCACATTTTTCATGTTGTACGTCTCTTCTC  
GTGCGACAGCAGGCTGATCCACTTGACCTCGGCACACGTCTTTTAAGGCGAGGAGC  
CGCACTAGCCAAAACACATCGACACCTCCAGGAGAGAGAGCATGGGTGAACTGCAC  
TTGGATGCGAACAGCATCTTCAACGGCATTGTGGTCGTGGTTTTTGCAGCAGGGGGG  
AGTTGGGCATTGGGGCAAGCCTGGGGACGGCTTGGTCTTCTGAGTAATCGGCTGAGT  
TTGAAAATTTTGCCTGCCGAGCTTAGAAAAGTAGTGGAAGTCAAGGGGACCCTGC  
GAAGATCGCTGTTTTTCTTTTGACACAGGTGCTTTTTTGCCTTGCAATCATGGGAGTG  
GGTGCGGTCTATGCTCCTCTTGCGTTTTTTCGAAGGAGGAATGAAGTGGTTCGTTGCA  
ATTTTGGCTGTCTCGGTCTATCGGTTTATGGCTGCGCAATCTATGCGGTGCGAATAC  
TTATCCGACTGCGTAAAGGTGCCGCGTATGTGCAGCGGCAAGAAGCCAGGATTGCG  
GCGGTTGAGGAAAAGCTTGGGCGAACGCAAGTTGGGAAAGAAAAAGTTAGGGATT  
GATGGGTTGTCTGTTTCGGCAGCTGCCAGCATTAGCTCGGCAAAAAGTTAGAAGAGG  
CTCCGCAGCCGGGGCCTCTTCTTTGCGTTTTCGAAAGACTTAGCTCAAGTCACAACCG

CTGGGCTGCGGCCAGGTAGTAGCTGGCAACATCGCCTTGACGTTTGCCGGTGCTGAG  
ATGCCAATCGTGCTGGCGCCAAAGGTGTCTTCCAGCTCATTGATGCTGACGATGTAG  
CTGTCCAGCGATCCGAGCGTGGCGCTGTTCCGAATGAGCCAACTGATGGCCCCGCGA  
GCCGCCATTGGGATTGGCCGTGATGATGGTCTTCCAGAAGAAATCCGGCGTGCGGAT  
GCCATGACTGGTGAGGAAGTAGTCGTTGGTCGTGTCGCTGTAAATGACGCCCCCATA  
GACTTGGACGCTTGCTATATCGCGATAACACTCAGCCACTTCTTCGGCACGGACCCA  
GATGCCTTGATTGAAGCTAGCCACCTGCGGAACGATGTTAGACATCAAGTTCGCGCG  
GCGGATGTAGGTGGCGTTGTAGTCCATGTGGTTGGAGGTCACCAAGTGCCCCCGGTC  
ATAGCCCGAACGCACACTGGCATAAGGAAGCACTGGACGTTTGGCCTGCGCAGCCAC  
TGGGTAATTCGGTATCCAAGTTGAAGCTTGAAGGGCGCGCTGCCGAGCCGGTGTCG  
GCTTGCAAGACATACTCGTAGCGCAGCGCGGTGCGGTTGGTGCAGTCGTAGCTCAAC  
GTGTAGCCACCCTTGTTGAGCGTGACCACTTGTGCCTGGGCCGCAGCACTGAACGTG  
GTGATCAACGACACGGCGAGGAAGATTCGGAATCGCATAGCAGCACATCTCCTTGT  
GTTTTCTGGGGTCGCACAAGCTCAGCAAGCACGGAACAAGGCCGTTGCCTGTTGAG  
GAACGCATGAGTTGACGGAGTTGAAGCAGGCAGCCCAACTGGGCGAGTGGCAGGGT  
TGCGCCGCGCCCCCTGTTGCCACGGTGTGGCACGCGGTTCGTCACTTGTATCTAACAAA  
CGAACTCTAGCGTCAATCCCTTATTCTTGAAGTTGTGACCCAGCTCCAACGACCTGA  
GCCACTAGCAAGTGGGTGGTTCCATAGCGTGGCACAGGCGGTGCGGTCTCAGGCGA  
TGCGACAGCGCCATCGATACTCTGGGTTATGGACAGAGCCCAGTTGAGAACCCACC  
TTGATCACTTGGACGATGCGGTGCCGGCGTTGCGGGCATCAAGTCCTGACAGATGCC  
ATTTCTTACGCGCTTTCGCGGGCATGGCGCAGATCATTGAGGCAAAAGCTCTCACTG  
CTCAGGATGCCGAATTCGTTGGACGGCGGATCAATGAGATTTTGGTCTGGCATGGAC  
TCAGAAGCATGGACGAACCAGGCTGGGGTGACGTCGGTCGCCAATCCGCCGACCTA  
CTTTCATTCTCACTGAAACCGCCGGGATAAACCAGCTCACTTTGCTATTGCCAGTGC  
GGTGGACGACAAGTTCTTGATTGGTCCTCTGGCTCGGAAGTCCTTAGAGTAAGCGGG  
GGCAACCGCTTGTTTAGATCGATTGATCGCTTGGCTAGCGGCCGCCCTGAAACTTGA  
AGGTAAAGCGAGCGGCGGGTAGTGGGGTGGCCTTCCCATTGATGGGCACGGGTGTG  
GCGTCCACCAGCGTCAACATGCCATCGGCAACAGGCACCGGAACGCCAAGCGTGAG  
ATCAATCTGCTGGGACCAGCCGCCGCCGAGCACGGTCGTCTCTGACGATCAGCTGCCC  
TGCATGAATACATTGGACATCAGCCGGGCAACGGCTGTCCTCAATCACTTGGTCGGG  
ACGCACCTTGGGCGCATCGACCGCCGCAATCTCGCCCAGACGCACGGGGCCTTCAA  
TGGGCGAGCTAGTGACGGGGCCAGTCGCTGCACACCCGGCAAGTGAGACGACCCAA  
ATCGTTTTAAGCACTCGCATTTCGATTAGCTAGGGCAGCCTTTAGCTGAGCGTTTCGC  
ATGGTTGGCCGCAGGTCGGGAGATGGCCCGAGTGTCACATACGCTTTACGAAAAAC  
GGTTGAGCTGCGTGCCTGAGACTAGTCCAGCCGAAATGCTGTGAGCACGAGCACTTC  
TTGTGAGCGGACTCTTATGGCATGAAAAAGTTAGCGCTCGGCAAATGCGTGAGGGC  
GATTGGCAAAAATTGCACGCCAGCAGCATGCAGTCCTCTTGGCGCCTCAACCACCG  
GCATGGGAGTAGCGCATCACTACTCTCCACCAGCGCTGGGCCTCTCAAAGGGACCTT  
AGCTTCGCTGTCCCAACCGCAAGGACAGGCCTCCTTCTCGACGCTGACGCTTTGTTG  
CGGCCCTTCGCTGTGCGCCGCTTGCGCGGTGCTCGCTCTCGGGTGCGGTAGGGCCGG

ATGCTTCGCCTGTCGGTTCCCACGAGGCGCACAAACGCGCTGGTGGAGAAGAACCGA  
TGAAGCGCACCCCAAGACATCAAGGCTCAATACCAACTCCAGATGGACGAGGAGGGC  
ATCTTGCTCGCAGCAGC

>CONTIG\_38\_length\_9319\_cov\_235.549717

GTTTCGATATGGTCTGATATCGCCACGGTTTTACAGGGCGCGCTGGCTTGCTCAAGG  
CCTAGTTAACTTAGAGAAATTCAAGCATGTCATGCTTGATTCGGCATCTTGATATA  
TCGACATAGCATCCGGTGGTGATGCGCTATGGATTGTTTGAAGCTGCTCTGTGTGCG  
TCACCGATCTGGCCGGCTACGCCGGCCTGGAGGATGGCGTCGATAGGCATTGGGAT  
CGCATCTTCGCCGGTGTGGTGCTGACCACCTTGCTGGGCGTCGGCGCCGAGCTGTGT  
CTGATGCCGACACGCGCTGCATTGGGAGTAGATCGCAGCACCCCGCTTGAAACGCG  
AACGCACGCGCCCGGCACAGACTGGGCAACGAAAGCCTTGCGGGCCAGCGCCACTTG  
TAAAGCGCGCGGTAGCATTTGGCTTCGGTGCCGTAGGACGCAAAGAACTCGGGCAT  
CGACAATCCCGCTTGGAATGCACGGCATTGATGCTCATCACGCCACCTCGTCGGCT  
TCAGGTGACAGCAGCATCCACAAAGCGCGGGCGCAGATCCTGCGACTGGTAGCTGAA  
AGTCAGGGCTAATCAGGAGATTAGTTGGAAGGACGTTGAGTTGCCCACCTTGACCA  
GGCACTCTTTGACTACGGCCAAGGGGATAGCCGGATCGTTTCCAACGGACGAGTAA  
CAGGGGCGTTGGCCTTCGGTACAGCAGGATTGGTTAGCTGAGCTAAGCCGACCGGG  
CCTCTAGAAGCTTTGTGATCGGCGTTCTACCGTCTTTCCTTGGCGGAGCCGCACAGC  
AGTCTACATAGACTTCTTGTTTCCCTTCCTCAATGTGGGAGAATTACCGGAAGCCTGT  
CCCGCCTTGAGATTCCCATGACCGCCACCAATCCTGTTGACGTTGCCAACCGTTTGG  
AGGCGATGGGCCTGAATGAGGCTGCGCTGCGGGAGGCCGTCAATCAGGGTTATTTG  
CAGCGGACTCGCCTGACCGCCAACCACCCCATCATCTACCACGGCTTGAACATGTGG  
GGGGAATTTGTCGCTGCGTTGCGTGACCAGCTCCGGTCGTTGGATTGGGTCAGAGAG  
GATATCGGCAGCTATGCTCTGACCGTCAATGAAGAGCTCAAGCTGGCGATCACCGTG  
GCATCAGGTGATGAAGCTACTGGCAATCCGGATGCACATCCCATAATCGCTCCCGC  
AAGGGGCGCAACACCGTGGACGCGATCGAGGCTAATCGTCAGTTCGAACTATTGCA  
ACAGATGCCGCCTGCGACGACTGATGAAGATGAGGGTAAGCAGACATGGGTGCTGA  
TGCATCACACCGACATTGCCCGTGGCGAAATTCGTGTGGAGTTGTCCCGCCCATTGA  
GTATTGGGAGCGACGGCAAGATTAACCAGTGGGCCGAGCGCATCATCTTGGCTGGC  
ATTCCGTTTGACGATCAACTGATTGAAATCTATCCGCCTAGCGGACCGGACATCGAT  
TTCGACATCCAGCGAAAAGCATAACGGGATTGTTATGTTCAACCCGTTGCGATTGAC  
CCTGGCAAGAAAGCGCCGGGGAATGAAGAAACGTGAGCTAGCTGAAAAGATTGGTT  
TAACGGAGAAGTCGGTTTCAAATTACGAAGCCGGATCCCAAGAGCCAGAGAGCACG  
ACGCTGAGCAAGCTATCAGAAGCGCTTCGGTTTCCCGAAGCGTTCTTCTTTGGTGAT  
GACCCAGAAGTTCCAACCTCTGACGTCGCTAGCTTCCGTTCCCTCTCAAAAATGTCT  
GCTCCTCAGCGCGACTCCGCGTTGGGAGCGGGCGCTGTTGCCCTGTTGCTAAACGAC  
TGGATCGAGTCTCGCTTCCAGTTGCCTGACCCAGATGTTCCCGATCTGGGCAGGGAG  
GGGGGATCCTCCCGTGGTGTGCGGGGTGATCAGTCATCGAAGGAAGCCGAACCTTA  
TCCAACGCGTGCCTCCGCTCAGGATCCTGAGGCCGCAGCTGGAATGCTGCGCGCTCA

TTGGGGCATGGGTGAGCAGCCCGTCAAAAACATGATCGCCTTGCTTGAATCCAAGG  
GGGTGCGTGTCTATTCTCTGGCTATTGACGCCAAGGAAGTAGACGCTTTTTTCGATGT  
GGAAGGGTGGGCGGCCGTTTGTATTCCTTAATACCTTTAAATCGGCTGAGCACTGTC  
GCTTTGATGCGGCCCATGAATTGGGTCATCTGGTAATGCACCAGCATGCGCAGCCGC  
AAGGCCCTGATCTTGAAAGGGAGGCTAATGCTTTTCGCTTCTGCCTTCCTGATGCCAA  
AGGCCAGCGTGCTGGCACTCGCTCCCAAGTCAGCCACCATTCCCAGCCTTATTCGAC  
ACAAAAAACACTGGCTGGTTTCCGTCGCTGCATTGAACTATCGGCTGCATGCGCTAA  
GTCTTACGACCGATTGGACCTATCGAACGCTTTGCATCCAGATTGCACAAGCTGGGT  
ATCGAGGAAAGGAGCCCGAGAGCATCAATCATGAGAAGTCTCTCGTTCTGGAAAAG  
GTGTTACAGCACTTCGAAATGAGGGTCTAGGCAAAGCAGATGTAGCGAGACAATT  
GGCCATCCCGCCAGAAGAAATCAATGATCTGACCTTTGGGCTGATGCTCAATGCACT  
CAAAGGTGGTCGCAGCGATGATGCTGTTCCAAAAGCCAGTCGTGCAAACTGCGCT  
TGGTCAAGGGCTGAAATGATTAAGAGAGCGGCAAGCGCATGAACGCAGTTGAGATT  
GAAGAGGCACTATCAGCTCTGGCTGAGGCCAGTTTGAGCCGGCAGAATTCCCATAT  
CAGTTCCTGACAGCGTTTGGGAACAAAGACACTACTATCAAGCGCCTGCGGAAGGG  
CGATAGCAACGCGTCCGACGTTCCGGGCGCCGTCCTGCAACGAAGCAACATCCATC  
TGGCCACCTGTGCCCTGGGAAAGGTCCAAGAGACCTTGCAGGCGTTGCGCGACAGT  
CCGCGGACTCTGCCAGCCAAAGCCAAGTTCGTCCTAGCGACCGATGGCCAAATCTTG  
GAAGCTGAGGACCTGATCAGCGGAGAAGTGCTAGCCTGCGAATTCGTGAACTTTGC  
TGACCACTTCGGCTTCTTCCTTCCACTGGCAGGCATCTCCACGATCAAGGAGATCAA  
GGAGAACCCGTTTGACGTTTCGAGCCACTGGCCGACTGACTAAGCTCTACATCGAGCT  
TTTGCAGAACAACAAGACCTGGGCGTCGGACGAGCGCCGAGCGGACATGAACCACT  
TCATGGCGCGCTTAGTGTTCTGCTTCTTCGCGGAAGACACAGATATCTTCCACGGCA  
CGAGTCTGTTTACCAAGACTCTGCAAACGATGACCGAGTCTGATGGCTCCAACACCC  
ACCAAGTGTTGGAAACCATCTTCCGTGCCATGAACCTTGCTACCGAAGAGCGGGCA  
ACGGCCAAGCTGCCGGGTTGGGCTGAGCATTTTCCTTATGTCAACGGAGGCCTGTTC  
TCTGGTAGCACCGATGTTCCGGTGTTTACTCGCACGGCGCGCTCCTACTTGATCCGC  
ACTGGCGAGCTGAAATGGCAGGAAATTAATCCCGACATCTTCGGGTCGATGATCCA  
AGCCGTGGCCGATGAGGAGGAGCGCGGCTCACTGGGCATGCACTACACCAGTGTGC  
CCAACATCCTCAAAGTGCTGAACCCACTTTTTCTGGATGACCTGCGCGCACAGTTGG  
AAGCTGCCGGCGAGAACAAGGTGAAGCTGCTGAACTTGCGAAAGCATGGCACGCAT  
TCGCGTGTTTCGACCCAGCCTGCGGTTCCGGCAACTTCCTAGTCATCGCCTACAAGCA  
GATGCGAGAAATCGAGGCTGAGATCAACATGCGGCGAGGGGAAGCGGAACTGCGC  
ACTGAGATCCCGCTGACCAATTTCCGAGGCATCGAGCTACGCGAGTTCCCGGCTGAG  
ATTGCGCGGCTGGCTCTCATAATCGCTGAGTTTCAGTGCGATCAACTCTACCGCGGC  
CAAAGGAAGCGTTGGCAGATGTGTTGCCTTTGGATTCCCAGAACTGGATTACATGT  
GATAACGCGCTGCGTCTGGATTGGTTGGCGATCTGCCCCGCCACTGGCACAACGGTA  
AAGCTGATCGGAGACGATCTTTTTGACACTTCTATTGACCAGGCAGAGATCGACTTT  
GAGAACGAAGGTGGTGAACATATATTTGCGGTAATCCCCCTATGTGGGGCGTAA  
ATATCAGACAGATGCACAAAAGGCGGAATTAAAGGCCGTTTTTCGTGGTCGATCCA

ACGACACTTTGTCGTTGGACTATGTATCTGGCTGGTTCATGAAGGCCACCGATTACA  
TGGCGGAAACGCTGGCAGACGTTGCGTTTGTTCGACGAATTCATCTGCCAAGGTA  
TCCAAGTCTCAGCTCTTTGGCCACGTTGTTTGGTGAAGGTGCAGAAATTAGATTTG  
CTTATCAATCCTTTAAATGGGCGAACCTTGCAGCAAAGAATGCGGGGGTTTCGGTTG  
CCATTATTGGTTTAAACACGTAGGAATGGCGGCACTAAGCAGATTTTTATCGCCAATG  
AGGATGGGGTAGTTACCGTTCGCACTGTCTCTAATATAAGCCCTTATCTTGTTCCAG  
GAGACAATGTTCTGGTTTCACCTCGATCCAAAGTTCCAGACGAGCGCGCACCTATGC  
AATTTGGCAATCATCCTTACTACGCGAATGAGCTAATGCTTTCGCTGGATGAAGCGT  
CCGGGATGGTAGGAGAAGATGCGCGGGTTGCTGAATTTATACGTCCCTTGTATGGCT  
CACGTGAGAGCATCAGTGGCACGCCCCGCACGTGTTTGTGGATTACAGACGAAAAC  
CTTGCGCTAGCGCAAGAAATCCCTGCTGTATGGGCTCGTGTTGAAAAAGTCCGCAAG  
GATCGTAAAACTAAGACAAAGGATGTTTCAGGCAAAAAGCTAGTTGAGACGCCGTG  
GCGCTTCCGAGATCAATATGAAGCGGAAAGCAGTTTGCTGGTCGTTCCGATTGTAAG  
CTCGGAGAACAGGCCGTATCTGCCAGTTGTTCTGCTGTGAAAGAGGCGATAGTCCA  
TAACAAGGCGTTTGGCGCTGTATGACGCGCCTCTTTGGAACTTTGGCGCTGATTGTGTC  
AAAGATGCATCTTGTCTGGGTGGCGGCTGTCTGTGTGCGCTTAGAGATGCGTTATTC  
CTACTCAAATACTTTGGGTGGAACACCTTTCCGGTGCCGACTCTCACTGAACAAAA  
CAAAGCGGATCTAACTCGATGCGCGGAAGACATTCTGCTTGCACGAGAGTCGCACT  
ATCCGGCCACAATTGCCGATCTTTACGGCCCTGATAATATGCCGGATGACCTTCTCC  
GTGCCACGAGCGCAATGACGAAGTCCTGGAGCGGATCTACATCGGTGCGCGCTTC  
CGCAATGACACCGAACGCTTGGAAGCTGTTTCGACCTCTACACTAAGATGACGGC  
GGGCCAAGGCAAGCCAAAGAAGAAGGCTAAGAAATGAGCATGGAAGGCAATCCGA  
CCAACAAATACACCGTCCCGTCAGTGTCCATCGCGACGGCACAGACGGGTGCTTCC  
AGCAAGATCAATGCTCTGGGCATGCGTCCGATGCAGGAGAAGGCCTATGCCAAGCG  
AGGCGAGCAACACCTGCTGATCAAGTCGCCCCGGCCTCCGGTAAGTCCCGAGCCTT  
AATGTTTCATTGCCTTGGACAAGATCAAGAACCAGGGCTTAAAGCAGGCCATCATCGT  
AGTGCCCGAACGTTCCATCGGTGGCAGCTTTGCCGACGAGAAATTGTCTGAGCAGG  
GCTTTTGGGCGGACTGGATGGTTAGGCCTCAGTGGAACCTTTGCAATGCGCCAGGTG  
AGGACAACGGAAAGGTAGCCCCGTCCAAAGTGAAGGCAGTAGGTGCTTTCCTGGCC  
AGCGAAGATCCGGTTCTGGTGTGCACTCATGCCACCTTCCGTTTCGCCGTGGATGAA  
TTCGGTATCGAAGCCTTTGACGGACGCCTTATCGCCATTGATGAATTCCACCATGTC  
AGTAGCAACCCGGACAACAAGCTAGGCACGCAGCTCGGACAACCTCATTGGCCGTGG  
ACAGGTCCATGTGGTTGCGATGACGGGTTTCGTATTTCCGTGGGGATGCGGTCGCGGT  
TCTTTCGCCGGAAGATGAGGGCAAGTTCGAGTCGGTCTCCTATACCTACTACGAGCA  
GCTAAACGGCTATACCTACCTCAAAAGCCTGGACATCGGGTATTTCTTCTATACCGG  
TCGCTACCTAGACGCGATCATGAAGGTTCTGGATCCGTCTTTGAAGACGATCATCCA  
TATCCCCAATGTCAATGCCCGCGAATCTTTGAAGGACAAGCACAAAGAGGTTGACG  
AAATCCTCGCCTCGCTGGGCGATTGGAAGGGACGCGATGAAGCAACGGGCTTTCAC  
CTGATTGAAATCGAGGGTGGGCGGATCATCAGGGTGGCTGACTTGGTGGACGACAG  
CGACGCGGCCCGTCGCTCCAAGATCCTTACGGCCTTGAAGGATCCGGCTCAGAAGG

ACAACCGCGACAACGTCGACATCATCATTGCCCTTGGGATGGCCAAGGAAGGGTTC  
GACTGGATTTGGTGTGAGCACGCTCTGACCATTGGCTACCGCAGTAGCCTGACTGAG  
ATCGTCCAGATCATTGGTCGAGCCACTCGCGATGCACCAGGTAAGGGGCGCTCCCG  
CTTCACTAACCTCATTGCTGAGCCGGCCGAGACTCGGAGATAGTGGTCGATGCCGT  
GAATGACACGCTTAAAGCCATCGCTGCAAGCCTGCTGATGGAGCAAGTGCTGGCGC  
CGCGGTTTGAGTTCACGCCCAAGAATGCAGGCGAGAAAGAGGGGTTTGACTACGGT  
GATGAGGGCTACCAGGAAGGCAACGCCAATGTAGGCGTAAACGCCGCGACCGGAG  
AAGTCCACGTTGAAATCAACGGCCTCGCGCAACCCAAGTCTCCTGAGGCAGCGCGT  
ATCTGCAAAGAGGATATCAATGAGGTCATTACTGGTTTCATTAGGACAAGCCGACC  
TTGGAACGAGGGTTGTTTCGACAAGGAAAATACGCTGCCTGAGGAAATCACCCAAGT  
CCAGATGGCGAAGATCGTTTCGAGATCGCTACCCGGACCTGAGTGAGGAAGATCACG  
AGGCTGTGCGCCAGCACGCTATTGCGGTTCTGAACATTACCCAGCAAGCCAAGCAG  
GTGATAGCCCAAGTTGATGCGAAGGGAGAGTCGCCAAACATGTCCTTGATCGAGGG  
TGTCGGAAATTTGTCAATGTTAAAGACCTTGATATCGACCTGATTGATCGGATCAA  
TCCGTTTCGACGCCCGCTACGCCGTCCTGGCCAAGGCCATGGACGAACGTGTGCTTCG  
TCAAGTTCAATCCGCTATTGCAGCAAAGCGCCTGGCTATCTCCTACGAGGAAGCTAA  
GGACTTGGCCAAGCGCGCCGTTGCCTTCAAGAACGAGCGGGGGCGCTTGCCTGAAA  
TCGGCTCGGCAGATCCTTGGGAGCGTCGCATGGCCGAAGGCGTGGCCTCGTTGCAA  
CGCCACATCGCTCAGCAAAAGGCAGCAGCAGCCCAGGGAGGCGGCAATGGCTGATC  
GGGAAGGCGAGGACCTGCTGGAAGAACTGGGCCTTGAAGCGACACCGATCAAGGC  
CAGTAGCCACACCCACAGGAGGAACGCCTCCTGGCAGGGTTTGAAGACATTCTCC  
GGTTCGTCCAAGAGCATGGGCGAGCTCCCCAACACGGCGAAGACCGCGACATTTTC  
GAGCGCCTTTACGCCGTTTCGGCTGGATCGATTGAGGGCTCTGACCAGCGCCACGCG  
TTGCTTATGCCACTAGATTCCCAAGGCCTGCTATCGGCGCCACCCAGCCGCGCCGCG  
CCTGATGCTGCCGATGACTTAGATGATGCGGCGCTGCTGGCTGAACTTGGCCTTGGA  
TCCGGTGAGGACGACATCACCAATCTGCGTCATGTCCGATCTTTTGAAGAGCGTAA  
GCTGCTGAGGATGTGGCAAACCGGACCGCATGTGTTCGATTTTCGATCGGTTCCAGCCT  
CTATTTGAGCGAGTGGAAGGGATATTAAGACAGGCCTTCGCAAGACGCTGCGGTT  
TGGCCGGGATGCGAGCGTGGCCGAAGGAACTTCTTCATCCTGGGCGGCCAGATGG  
CCTATGTCGTCGAAGTAGGGGAACTATCCGCGCCCCCAATGGCGAAGCCGATGCT  
AGGCTGCGCGTCATCTACTCAAACGGCACTGAGAGCAATCTGCTGCAACGCTCATTG  
CAACGAGCCCTCTACAAGGACGACACGGGTCGACGCATCACAGATGACGACGCTGG  
TCCTCTCTTTGGCGATACGTTGGAGCTGAAAGATATCGTTAACGGCACCATCTATGT  
GGTGCCTAGCCTGTCTAACAATCCATTTCGTGGTTCGCACATCGTGAGTTGATCCATAA  
AATCGGCATCACAGGCGGGAGCGTCGAAGCGCGCATCGCCAATGCTCAAAAGGATC  
CGACTTATATGCTAGCCAAGGTAGAAGTGGTGGCTACCTATAAGCTTTCCAATCTCA  
ATCACGTCCGTTTGGAAAATCTCTTTACCCGCATTTTCCAATCGGCGCGCTTGGATCT  
GAAACTCCAAGATCGCTTTGGCGATAATGTCCGCCACGTGAGTGGTTTCTCGTGCC  
TTTGCTGTGATTGATGAGGCTGTAAAGCGCATCCAGGATGGATCCATCACCGACTA  
CATCTATGATCCGGCCCCGGGCTGCGCTGGTCAAACAGTAAAGGTATTTCCACAGGGC

GCGTACGCAACCTGATGCTTCGTTGGGCCTCAAAGTAGATCAATCAGCAGTAAAGA  
CTCCATCGCGGAGATGATCCGGCACGCTAGCTCAGCGCGGCCCCGAGGATGAGTTGA  
TGGCAAAAGACAAGAGCGACCAACACCTGCCCACGTGGCATCCTTCGTTGAAGAAG  
ACCTTCAAGCGGTGTGATCGCTGGATCGAGCACGCCAGCCGGGACAATGAACCACA  
GCGATATTTTCGACAACATAGAGAACTATCTTGCGGCATCCGGCCCCGTGTCGGGCAA  
ACTTTGGATGGAACAACTTGGGCTGGCCATGTGTATGCGGTCCAAGCCTGCGCCCT  
CAGCGGCCAGGGCCGCTTGGACGAACTCGCCCAGCCGCTGTGCTGGGCGGTGGCGA  
TGCGCTCAATCGCATTTTCGTTTCGAGGGCCGCCGTGACCCTGGCCTGGACCACTGAGA  
GGCAGCCGCTGCTACCGTTCTGGACCAGCATGAAGGTGGCTGCCACCGCAATGCTCT  
CGCAGTGGGAGGCCACCGAGGCTGGTGCCCGCTTCCTGGTCCAGGT

>CONTIG\_39\_length\_9306\_cov\_135.224098

ATACTAGGGATTTTCGTCGGACACGTGATGCCGATCGATACGCAGTACGTTGCGGTAG  
AGAGCCGCTGGCCAGGATGAAGCGCCGTGCCCAACTGAGACACGCCTGCTTGGTGC  
GCAGGCTGTAGTGCCGAACGCGCAAGCGGTGCGCGCACTCGATCAAGCAGCCGCGTC  
GGCGGACTTGCTGTTACGCCATTGTTTTTGGGGGTGTATTTTCATACGCCTGCGTCCTT  
GCTGGATGAGGCTGGAAGCCCCGCAATGGTAGAGTCCGCTCGCCATCGTGTAATCC  
CGTGATCGCGGCTAGGATTTCCCCCATTTACAAAGCGCCAGCGATCGAAGATATTCC  
GTGCAACACCCCATTTCGGCGGTCCAATAGTAGTTAGGCACCACTATGCCCATTTCCA  
GCCACTCGTGAGAACCTTACTGAAGCTCTTGCGCGTGCTGATGATTCGTCGCGGGCC  
GATCGCGTAGATCGGATCGAGTGGCTGGCTCAGCACTACTTTCATCCGGGCGCGGTC  
ATGGGTGATCTAACGATCCTCCACATGCTGGAAGAAGCGCGGCTCTGTTTTGTTTCC  
GGCCACTTTGTTGGTGCAATTGCTCCTTGCCACTTCTTTCGTAGAGCACACACTTAGCG  
AAGAGCTAGAAAGCTTGGCTCCTGCGCAGGAGCGACATACATTTGAGCTAATGATT  
AAGGCCGGGCGCCAATACCTTTTCGTTGCCAAATGATTTGTTTGACCGCACCGACAGG  
CTTCGGCAGCTGCGCAATCCGTTACGCACCGCAAAGCGGCTAACCACCCTGATGCA  
TTCGGCACCAAGATTCTTGGCCCCAAAAGTCCATCCAGCTACGATACTGGAGTCGGAT  
GCCAAGCTGGCTATGGAGGTCATGTATGAGTGGTTTCGGCGCACCCCTGCGGAGTGCT  
TAATAATTCATTCAAGCCGAACCCGCTTCGCAGGTCGGCTTAATTCAGGCTTTAGAC  
CGCTCAAGGAGTTCATCGTAACCATGAAGGTATTTCTGCACACCCGTAGCCCGAAGC  
AACGAGACTGGCTAAACGAGGAGCGAGATTTTCTCGCATCCCCGTTGTGGGCGAGT  
ACGTGGCAACCTCAAGTGACGGTCCGTGGTTCAAGGTTGAGCTCGTAGTTCACACGC  
CGTTTCCGTGCGACTTCGACGCTGAGGTGTACGCCGTTGCGGCAGACCACCTTGAGG  
TTCTCAAAGAGACTTTGGATGGCTAGCATTTCTCTGACGCGGCCTAACAATTCATTC  
AAGCCGACCCCGCTTCGCGGGTTCGGCTTAACCTAAGGCGTTAGGGCGCACGGAGGTA  
GCATCGCAATGCTCAAGAGGCTAATCAACGCTTTCGCTAAATCCAAGGCAGACAAA  
GACATCAAGCAAGGCCTCGCTCTCGTTCAAGAAAGGTGGCTGGCTTATCGATCTCTG  
AATCAAAAACCACCAGAACATGAGATCGTACAGTTCACTGGCCCATTCATTGCACC  
GATGATGTCTCAACTAGCTTCTGATCCGCGATGGGGCGGAAAGCCGCAATCTGCCAT  
GCTCGACCTAATCTTCGTGGTGCTTCTTGCGGATGCAGACACGGAGGCTGGCCAAGG

GAAGTTGCGCGCCATGCGAGAACTCCTAGGAGAACAAAGCGTGATTTCACAGCACA  
CTGGCTGCGACCTAACAATTCATTCAAGCCGAACCGGCTTCGCCGGTCGGCTTAATT  
CAGGCGTTAGGGCTCACACACAAATGCCAGCACGTCTCTACCAAGAAACCCTAGAC  
GAGATGGATCTGGCCTTGACCGCGCTGGCCGAGCTGACACCACCGCCACATGCCGT  
CCCGTTCAAGGGTGGTTTTGTCTATCGTCATATCGAGCAGCTTCCTCAGCAAGCGAT  
CGTCCAAAAGCTTGCTCGCCTGCCATCTGGCCTTCGTGCGGGCGGCCTCGCTTCTTGA  
GTCTGGATTCTTTCAAGAACAAAGCCGCTCTACAACGATTGATCGATGAGATCGGAGA  
AGACGTCATTTTCTGTCCATTCCGCTCATTTATGGCGGGGAGCAACCGGTCCATAC  
TGAGTACCTGCAAGCTTTCTTTGCAGAAGAGTTTGATCCTGCGACAGGCTTACCTAC  
TACTCAAGATCGTCCGATGGTCAGGCGCAAAAAGATTCGCGCCTACATTGCGCAGTC  
CCCAATAGCAACTCCTGATCCAAGTGGTCACATTGGCGCGTCAAGAACGCTCAGCA  
AGGCATACTCCGGCTATGTTACGCCGCGTCACCTCAGATAATGGACATGTACGGTG  
GTGATCCGCCGCGATTCCACACCTCCGGAATGCTAGGTACGCCACGCGAGCCAGAA  
CATCGTCAAGATATTGCAAACCTACTTCTATCGTAGCGCTACTGCGTATGCTGTGGCT  
GCGCGTGCTTTTGGCAACCAACCTGTTTTCAATCGCCTCTTCGCTCTTTGCGTCAAAT  
ATGAAGCGACCATGGGGATCAGGTAGTGAGCCCTAACAAATTCATTCAACCCGAAGC  
CGCTTCGCGGGCTCGGCTTAATTCTGGTGTTAGGCGCCATGGACACAGATCGGGCATC  
CGCAGCAAAGAGCTATCAAGAGATCGCCAACCTGACGCTTGGCGGGCTATCAGCTCA  
TTGAGGCACTGCTAAAGACCTACTTGCGGAACTACTTCAGCATTGCCAAGCATCGCT  
TAGGTATCGACCTGCACTTCGGTTTTACAGGCAGCGACTACGACAACGCAGCGCTTG  
GTACGCTCCTGAAAGTCTTCGCTAAGACATGCTCAGACTCACAGCTTGTCAAAGACC  
TTCAGGCCGAGATTCCTCACCAGACACGCTGGCCCATCAGGCGTCACTCGTGATGT  
TCAGGCGGCAGCCGTGCAGTTCTGAAGAACTTCAAGCACTTTCGGAAGAGCTTTTGA  
TCCGCAGTGGTTCTATCTCTAGTCTTCTGACTCGCGTAAACAATGTGCACGATCTGCT  
CTTGGCGCCCTACCGCGGAAAACCTGGGGCTTGGCGCCTAACAAATTCATTCAAGCCGA  
ACCCGCTTCGCGGGTTCGGCTTAATTCAGGCGTTAGGCCCGTAAAAACAGAATGCCG  
CAGACGGAACTGATCCGTCTGCGGCATTGTTAGTATCACTCTTCGGCAATGATTGT  
GATGCCACGTTCACTCACTTGCACTTGTGCTTTGTGGCCTACGGAAAATCCTGCCGC  
TTGCAACCAATCTCCGCTCAAACGCAAGAACGGTACCTGTCTCGGCAGGGTCCGGC  
GCTATACATCTTTATGCTTGCTTTCGTAGACCTGATAGCCAACGGTTAAAAAACGCA  
GTTCCGGCTGCGCAGTCTTTCTCTTTACGGCCATAGTGGTGCTCCTAGCGGATTGTTG  
AGTTACGCCCCTGTTGAGAGGGCGACCGAGTACTTCAACACCGCCGCTAGACGGCC  
CCCAGCTTTCCCCGGCAAGCCGGGTCTTGTATGACTGGACGCTACTCGGCCATAGAA  
ACTATGGGCGCAAAAAAACCGCGTTTCAGTCGCGGGCACTGCTAGCGGAAGGTATG  
TTGAGTACCTTAAGTCAATTTAGCGCTCTACTGGCTTGCGGTCAACTGGTGGGCATG  
GGCCTAACAAATTCGTTCAAGCCGACCCACATCGTGGCAGCGCCAGCGTGCTTTACG  
CTACGCTAGCACGTACTCGCTGCCCCGCTGCGGGTCGGCTTAATTCAGGCGTTAGGC  
GGTGGTGGAGCAAAACACCTTGGCGTTCTACCTCGTCAGCTGCTTCAGCACGCACGG  
GGGGACGTCGGTTTCAAGATCATCATGAGATCGAGCAGCAGACGCTGAAGAACAAG  
TCGCACTTATCAACCCAGGCCTTCTGCCAACTCCAGATTGGCTGACAGGAGTAGTT

GAATGCCCATGCAGCCGATGATGGCGCTAGACTTCGGTCACAGCAATCCAAGGGTG  
TGAGCCTGTGGACGGGATGCAACACATGGAAACCAACATGACCAATCAGCCCCAAA  
AGGGCGAGTTTTTCGAGCTGCTGCCGGACGGCCGGCGTGGAGGAAAGGGCCACGGG  
GTGATCTTCGAAAATGAGCAGGCTCTTTTGACGCCGCCCGGCTTATTTGCAGCCG  
GACGAAGGAGGATTTCTCCGTTGAGAGAGACGCCACTATTGATCTACAACCCCATG  
GAAGGGGCGTTACCTCAGGATCTAGAGGGAGGCTTCAGTGGCTACTGGCTGGTCTCC  
GAGCGGCTCCGCAAGGTGATGGAATCTGTGGATGCGGAGGCCTTCACCTTTGCTGAT  
ACTGACTATCGCTTGCCGATGGTTCCAAAGGTCCGACCGTCTTCTCTGCGATGTG  
GTTTCGCACGTTAGATGCTTTGGATGAGGAAGCCTCGGAACTCGATATAAAAATCAGC  
GACGATTACGAGGCTGGAAAGTATTACAGCCTTGCGGGTGGTAGTCGCTTGGCTTTC  
AAGAGTGACGTGCTCGGAAATGCGCATGTATTTAAACTTCCGTTCAACGATGGCGTC  
TTTTGTGATTGGGTATTCAAGGAGGCGGCTGAGGCCGCCGGTATTGGCGCTAATGGA  
AATTCTGACGGGCTATGGCTCTACGACACGGTGAAGTCTGAGCGGAAACACTCAC  
AAGGAAGCGATGATCTGCCATTTCTAACCAACGGATGCTTGGCGCAATCTGTAAGTT  
GGCCAAGCCGACAGGAAGGTCACCGAGCGCCTGAAGTGAGCCGAAGTCTTTTGGGC  
ATTAAGAGTGCTGGGCTAACTGATCATCGGTGGCCTGCAGAACGTCCGTCTTGCGGC  
TAGGTGGGCAGCCGCCGATGCTCCACTATCTAGGCGGGCAAGTTGAGGAGTTAAGC  
TGTTACGTAAGTTGAGATCAAAGCACCAAAGATGAGGTGGAACGTATGCAATCAA  
CAAGACCTAATCAGCCGACGCCGGGTGCCTTCTATATGTTTCGTGTCGGACATGGAGA  
GCAACGGGCGCGCTGCGGAGTGAGGTTCAACAATCTCCGCCAGCTGCTTTCGCCGC  
CGTGTGTGATCCTGCGTCCGCAAGAAGGCGGTTTCCCCTCGATGCTCGAGCAACCGC  
AGATGACTTATGACCCCATTCAGAGGTCCGGAGCCTCGTGATCTGGAGCCAGGGTTGC  
GCGGTTATTGGTTGGTGTCTGAGCAACTCCATGACGTCATGTGCTTGGTTGATCCAA  
ATGCCTTCGCATTCGCTGAGGTGGATTACCGTTTGGCCGATGGTATTAAGGGGCCGC  
GTCGCTTCTTATGCGACGTTGTTAGAGAGCTGGATGCCTTGGATGAAGGATTGTGCA  
GGCTTAAGATCAAGGTCAATGACGATTATGTGCGTGGGAAGTTCTATTCGTTGGGGG  
GCGGAGCCAGCCTTGCCCTCCGAAATGAAGTCTTGGGACAGTCGCATGTGTTCCGGT  
TGCCGTTCAACCCGTCTGTTTTTTGTGACCAGGTGTTTAAGGACGCGGTTACGAAG  
CTGGAATACCTGACGTGGCAGAACTTAGCGGCATCTCTTTCATCGACGCATCGGATA  
TCTGATGCAATCAGCTGACAAAGACGGACCCTAGATCATGGCAGGCAAGCCCCTCT  
TTCAGCAGCACACGGCGTCGATCAGAAGTCATTTGAGATTGATCCTTTATTACAGG  
TGCTTGTCGACAACGGTCGGTTAAATAAGGATGCGGCCACTAATCTGATTAATTTGC  
CAAACGACAAGGCTCTTGCCCGTGCCATTGGGGTTACGCCACATACAGGACGCCAT  
ATCAAGGAATATTCCCTTGGTATGAAAGATGCCCTCGAAGACTTGGCGTCCACGAAA  
GACGGGCAGGCGATATTGCTCCAAAAGCCTGATCCTGATGCCTTAGATCGAGTTGCG  
CTTAAGGTTTCAGCGATTGAGCGACACCGTGCAGGTTGCGCTGATCAATGGCGACTTG  
CGCACCAACAAAGCGCTGGGGCAAAAGATAGACCAAACCTCGAGCTGTCACCCGGGC  
ATTCTTCGGCGGCCCCGGACGGCTACGCCGCCAGAACGCGACGCAGTTGGATGCAC  
ACGCCCAGGCCAGTGCCAATGCACGCCAATGGGGCGGAGTGACACACAACGAAAG  
CCGTATCGTGTCCACGTTGCAGCACTTTCACAGCTCTGGACAGCCGCTGCTGGCTGG

CGGCGACCTCGATCTTCAGCGCCATGGGCTATCCCAGGCCATCGCCGACGCTTACCA  
CAATGGTTCGCTTGACCATGTACCCGGTGGCGTGGCTGTAGTGGAGAACACCTTGGG  
CGAGGAAGCCGCCAGACCTTTGCGAGTTCCTCGCGGTCAAAGCGGTGCCGCGTCCA  
TGGAAGTGTTGCTCGGCAATGCCTCGGCCAGCACCCCTGGTGCGTTCGGGTGGCTTGC  
TGGCGACGGGGGCAGACGCAGTTATTACTGCTCGCCGTTTCGGCCGAGCTGCTGGAA  
CAAGGCAACGCCACCGCCGCGCAATCCGAGGTCACCCATGCTTTGGCCCGCAACGC  
GGGCGGCTGGGCCGGTGGTGCGTCCACTGCGGTGGCGCTGGGCGGTAGCGGCTTCG  
TGCCTGCGGCCTTGGTTGTGGGCGACGCGCTGTTGATGAGCAAGGCGTTTCGACAAAG  
GCGCCGACTTGCTGGACAACCGCGCCATCTACCACCAGACCGACAAGGCCGGGGTG  
GAGTGGCAGTTCAATGGGCGGGATTGGGAGCGCCAAGCCGCGTTCGACCTATCCAG  
TGGACATCCCACCCAGGAAGCGGTGGGTGCCAGCTACGCCAAATCCCAGGAAGTGG  
GGGCCATGGCCAACGCCAAAGCCGCCGAGTTCGCGCTGGGCAAAGCGCCCCCGCCG  
CAGGACCCGTTCAACTTGCCCTGCCCAGCCGGGTGACCGGATTGGGTTGGACAATCA  
AAATTGGCATCGCAATCCAGCCACAGAGACGTGGGAGCGCCAGGTTAAGACCGGCG  
TGGCGGGTGCGGATGATCGCGGCGTCTACCAGCCACAAATCGCAAGCGCGGAGCAG  
ACACAACGCTTGAATCAGGAGGCTCTGGCCCCGATCGAGACCAACATAGGCACCGG  
CCGTGAGGCCATTGCGCAGGCCTACCTCGAAAGCCATGCCGCCAGCGCGGGCAAG  
ACTATGGGGTGGGCGTTCCTGCCGCCGTGGAAAGTGCTCTTGCCAAGCCGGATCGGG  
TGCAAGGCCACGATGGTCAGACCTACCAGCGCAACGAGTCAGGACAATGGGCCGGC  
AAGGATGGCGTTGCCAGCGGCAACCTGGCGGCGGAGCTGGAGCTCACCAACCAGAT  
GCGCCAGTCTTCGCTGGAGCGCGCTCAGGAGACCCTGGCGGCGATTGAAGCGCGTC  
CGGCACCCACGGCCGCAGAGATGGAGCACAACGAGCTGCTGCACCGTTACCGGGCC  
GCAGGCGTTGATTTGAACGTCAACCCGCAGACCCAGCAGGCCGTGGAGCTGGCCGC  
GCAGCGGACCAGGGACGCCAACGGCATCACCGGGCCGACCATGCAGCAGTTGCAGC  
GCAACGAGGCTGGGCAATACGGCTATGACAGCCCCATCGCACACCTGCAGAAAGGG  
CCCGATGGCATCACACGCGTGGTGGCTGTGACCAGCAGCGATGACATTCGGCAGGC  
GCTGAGTGAGACGCAAGGCAATCGGCGAGAATCGCCGACCCTTGGGCGCGTGCTTG  
AGGGAACGGCAGACGCGGACACCTCGACCTCCGAGTCGTCCAATCCGCAGCAAGTG  
CTGGATATCCAGGCACGTATGCAAGCCTCTGTGCGGCGCAGGCCGCAGCAAGAACG  
CGAACAGCAAGATCGCCTCGCGCAAGAGCAACACACAGCGCAGGTGCGCGAGCAC  
CTCCAGCAGGCACAGCCGGAGCACGAAGACAGGTCACAAAGCGAGCAAGCGCTCC  
AGGTGCACACAGCGCTGGAAGGTCAACGCCAAGCGGAGCAGCAACGCGAACAGGA  
AGAGCGCCAGGTGCAGGAGCGCCAAGCGCAGACCAGCCAACAGCGCGAACTGCAG  
GAACATGAGGAAAGGGACGTCCAGCAACGTCAGGCGCAAGAGCGCCAGGCTCAGG  
ACAACCAAGAGCGCGAGCAGCAGCAATACCGCCAGGTTCAAGAAGCAACGCGAAT  
TGAGGTCCAGGAACGTCAGGCTCAGCAAGCGCAGGGGCAGGACGAATTTAGCAAG  
CCTCGCAGCAACCAGACACTCAGCGGAATGCTCAAGATGCCGCGCTGGCTCACCAA  
GTAACGAGTCCTCAGTCGCAACAGGAAAACGCGCGCCAGCGGCCAGAGACACAGA  
ACCAACAGACAGGCGAAAATCTGGCGCACGACACACCTGACCCACTGAAGCAGACG  
CCCGGTCCAGGTGACGCGCAGCCGCATCAAGCACAAAGAGGCAGAGCGCGCGCTGGA

AATGCAGGCAATGGAGAGCCGCGCCGCCGCCGCGTCCAGGTGTCTTCCTCCGAAG  
GCCCCGAGCAGGACAGCCAACCTTCCCAGAGCGTGCAGGCCGATGCGGGGCTGTCA  
GCGCTGTCTCGCCACGTGCAAACGCAGCAGGTTGAGATGGAGCAAGCGTCGGTCCG  
CCAGCAAGATATGGGCGGTGAGCAGGAGGCAGCGCCGGTTCGGGTCATGGCCCAAG  
CAACGCCTGCGACAGCAGAGCCGTTGATTGCATCGCAGTCCGCAGCGTCTAGCAAT  
CCTGAGCAAGAAACGAAGTCAGAGCAGAACCGTCCTTCGGACATGTTTCTCGCTGA  
GCATGACGCGCCAGCGCTATCGCCTGCATACCTCGCGCAGGCATACGGGCAATCGC  
TGGGAGGTAGCGTAGAGAATCGCTTTCCCAAGGAGCCAGCAGACGCGGAAAACAG  
CAGGCCCAATCGATCCCGGCCAGGATCGCAGCGCCGCAGACCCGGGTGGCGCCCT  
GTTCTTGGAAGAGACCATGCGCTCGCTGCGCCAGCTGCAACAAGAGATTGAGGCGG  
CCGATCGGGAAGACGAACGCTTCCACCAGGAGTGGAAGGAGTATCGCGACCGTGGA  
GAACCCTATCCCTTCGTTTCGCGACGACACACGAAGCGCGCAAGGCGCAAGCCTTGA  
TGGGTTCCCGCAGCACGAGCAAGCACGACGCTCTCCCAGTGAAGCGGTTCGGGCAA  
CCGATGCCTTCCCACCTCTAGCCCAGCGCTCCATCGGGTCAGGGGGAAGGGATGCG  
CCACACGACTCTTCGCAGCCTGAGCGGAAATCCATCACGGGCGACCCGGATGTGGA  
CGAGGTGCTCTACGCGCTCGACAGCAAGAACGAGTTGGCGATTGAGCAGGCGCTAA  
ATCGTGTGGCCAACAGCGCAGCAACCCAGGCGCTGTTGAAAAA

>CONTIG\_40\_length\_9096\_cov\_39.003122

GATGCGCTGCGAAAAAAGTGGTAAGCGCACCGGCGCGTCGTACGCTGGTGCGCGAG  
TGGATCGGGCGCGGTGCCAGCGAGCGTCGTGCCTTGGCAGCGATCGGCATGAGCGC  
CAGTGCCTGCGCTATTGCCCGCGCGAAGACCGCAATGGCGAACTTCGCGAGCGCA  
TTCTTGCGCTGGCGCATCGCCATCGTCGCTATGGCGTGGGGATGATCTATCTCAAAC  
TGCGACAGGAAGGGCGCATCGTGAATAACACGCGTGGAGCGGTTGTACCGCGAA  
CAGCAGCTACAGGTCCGGCGGGCGCAAGCGCAAAAAAGTGCCAATAGGCGAGCGTC  
AGCCGCTGCTGCGGCCATCGCAGGCCAACCAGGTGTGGTTCGATGGACTTCGTGTTTCG  
ACCGCGCTGCCGAAGGGCGGGTGATCAAGTGTCTGGTGATCGTGGACGATGCAACC  
CACGAAGCGGTTCGCCATCGACGTGGAGCGCGCGATCTCGGGACATGGCGTTGCGCG  
CGTGCTGGATCGGTTGGCACACAGTCGCGGCTTGCCGAAGGTGATCCGCACTGACA  
ACGGCAAGGAGTTTTGCGGTAAGGCGATGGTCGCCTGGGCGCATGCCCCTGGCGTG  
CAGTTGCGGCTGATCCAACCCGGCAAACCGAACCAGAACGCCTACGTCAATCCTT  
CAATGGCCGACTACGCGACGAATGCCTCAACGAGCACTGGTTCCCGACACTGCTGC  
ACGCGCGCACCGAAATCGAACGCTGGCGACGCGAATAACAACGAGGACCGACCCAA  
AAAAGCAATCTGCGGCATGACCCCGGCTGCGTATGCCCAACATCTGGCAAACACCG  
ATATCATTACCCCCGGAATCTAAACCAAGCCACTACTCAGGGTGGGGGGACGTTCGG  
AATGCTCAACCGTCTTCGCGAATCTCCAGAGGCGGCAAGCCGGCGACGATCTTCTGG  
GTTTCTAGGCTTACCGTGACGACGCGCTGGAACATTTCCAGCGGGTACCTTGGGTTG  
TGCATGGTTTCGATGGCCCAGTCGTTGGCGTCATTGACGATGCCGCTTGCAATTGCC  
ACGCGCACGGCCTGGCGCTCCATACCCAGTCCAGCGCGGCTTTGCCGTTGACCACA  
TAGTCCCAGGCGGTCTCGGGGATGTGCGCGCAGGGTAATTTTGTGTTGTAGATCACA

GTGCTGCGGTCATTGACGGATTTTCCGGTGTCCGGATCCTTGATCTTGGCGAACTTCA  
TTTTCTCGACGCGGTAGTCGGCATCGATGAGTTTGCCCTTGGTATCGAGGGTCAGCG  
GATACATGTCCACGGTTTCGTAGTTGACATGCAATTCGCCCAGCGCGCGCCCGGCCT  
TGCTGAAGTGCCAGAAATCTTCAGCCTTGCGTACACGCGGGATGCGCGGTAATTCTT  
TGCTGAGGTTGTCGGCGTAGCGCTCGCGGTAGTCCTGCGAATGCAGGATGCCGTAAA  
TGTAGAAGAACAGGTCCTGCTTACTGATCGTCTCGTCTGGATAGGCACTCTGGAAGT  
GGGCGAGGCCGGCATCGGTGATGGCCTCGCGGCGCACCAAGTTTCCCCTCGGCTTCCG  
GCTTCGCGGTGGCGAACAATTCGCTCTGGTCGGACGGGCTCATGCTTCGTCTCTCCG  
CGCTCCGTAAAGAAATAGCGGGAAGCATTGCGTGTCTCCCACCATGTGATTGTCCGG  
CAACACATCCACCATCAGCACCGAGAAGCCCTTGGTGCCGCTGAGCGTCAGGCAGA  
TAGCCAGATTCTTCGCCCCGTTTCAGGCTGCCATCCGGTATGCTCGCTGCTCGCTGCTC  
GCTGCTCGCTGCTCGCTGCTCGCTGCTCGCTGCTGCTGCTATTGCTGCAATTTCTGTC  
CTCATACAGAGATTGTGGGAAGCACTGCCCCCTTTCCAGCGCGTCATAGTTGGGCAA  
GGAGTCCGTCATCAGGACAGTGAAGTCCTTCTTGCTGCCGCTGCCCATCGAGCAGAT  
GGTCAGGTTATGTTCCCGGTGACAGGAAAACTTTCGGCATCTGGTAGATCATTTTC  
ATTGAAGCGCCGATTGAAATACACCCATTGCTTAGTGAATGGTCGGTACAGACTGAT  
TACTTGGCAAGCTTCTTCGTATCCGAAGGTACGGCCTTTATTCAACTCCTGCTTCAAT  
GAGCGAGTCCAGCTGATCCGCGTGGCATCCGCGTCAATGAAACCATCCACAGCCCG  
ATCGCGGATCGACTTCGGCTGGCCTGAAAACGCCTGCTCGAAGCGAGCGGCCTCCG  
CATTGTAGGCCCAAATCATGCCAGACATATTCTGGCCCAGTTTCTCGAAGCTGGCGT  
TGTAGGCCCAGGCATCTCGGGCAGTCAGTACACCTTGCGAGAAATTGTCGAATACCT  
TGAGGCCATCGTTCTTTTTGTGCCCCAACGCGATGAACTTCTCGAAGCTGTCATCCCG  
CTGCCTCAACCAGTCTCCGTGCTCGTCGGGCGCGATCGAGTTCCATTCTGTCCACGCC  
AGCAATACTGACGTAGTCAGCAATCTTCTCAAGCTTGTCTTCTCGGCTCAGGTAGTC  
GCCGATATCGTGGAAGAAGATGCGGCCATGTTGTTTGGCGTGCGGATTCTTGACGAG  
AAGCGAAATGGCGATGGGCGCACGGCTACCGCTTCCGAAAATCTTGCCGCCTTCCTT  
GCGTGAAGTTTCTCCGCTGGTGCGCTGGTTACCGCGCAGGTGAAACACGTAGATGTC  
GGAGAACTCCTCGGCGAGGCACTTGCGCAGGCCATCCGCAGTGTTAGCTTCCAGAA  
ATCCGGCGTTTGTACGAAGCCGAGAACCCCGGCATTGCCGATACGGTCGCTGGCCC  
AGCGGATGGCGCGGATGTAAGTGTGCTACAAGCCCTTGGATAGCGTCGCCTGCGAG  
CGTGCCGCATAGGTTGAGCGGATACGTTTCATCCAGGGCCACATATTCCACATTGTGCG  
TTGTTGTCGTTCTCGCTCTTTTGCCCAACCGAATACGGCGGATTCCCCACGATCACCC  
GTATATCCAGCGCTTTCTGCCGCTTGCGTCGCCTGCTGTTGTCCACAAGAAGCTGATC  
GACCAGATCCTCCTTCTCATACATCTGAAACGTGTGCGGTGAGGCAGATACCTTCGAA  
CGGCGCATAGTCGCCACCGGCGATACCGTGATACGTCGCCTCGATATTGATGGCGGC  
GATATAGTAAGCCAGCAACACAAGCTCGTTGGCGTGATCTCGTGCTTGTACTTGTG  
CGCTAGTTCTTCGGGTTTGATCAGGCCCCGATTGCAGCAGGCGGGTGATGAACGTGCC  
GGTGCCGGTAAAAGGGTCGAGGATATGCACGCCTGGGCTGCCAAGGGTCTGGCCAA  
ACTCCTTCCGCAGCAGATGATCGACGCTGTGCAGGATGAAATCCACCACCTCTACCG  
GAGTGTAGACGATGCCGAGGCGCTCGGTTCATCTTCGGGAAGGCATTGCGGAAGAAC

TTTTCGTACAGCTCCACCACGATCTTCTGCTTGCCGACAGCACTATCGATCCCTTCGG  
CCCGCAACTTCACACTGGCGTAAAAGCCGCGCAAGGTGCTGGCCTCTTTTTGCAGGT  
TTTGCGCATCTAGCACGTCCAGCACGTTTTGCATTGCCCCGCGACATCGGGTTGTGGC  
TGGA AAAA ACTGTAATCGGCAAACAACGCCTCGAACACCGGCTTTGTGATCAGGTGC  
TGAGCCAGCATCTCGATGATCTCCGCATCGCTGACTTTGTCGTTCAAGTCGTCGCGC  
AGCTCGGCCGCGAAGTCGTGGAAGGCCTTGCGCGCCTCAAGCTGACTGTCGTCTTCC  
AGCAGCGCCTTGATCCGGTCAATATGGGTCTGGGCGATCCTGGCAATGTCGTTTGCC  
CAATCTTCCCAGTGGTGGCGGTTGCCGCACTTGTCCACCACCTTGGCGTACAGAGCC  
CGCTCGATCTCGCCGACCTCAAATTCGAGTTCGCCCTGCACTTCAACCGGATAGTGG  
CCCTGCGCCTCACCAATACTGTGCTTGCCTCGCGCCTTGTCTGCCTTGTTGGCGACCA  
GCCGTGCGGATTTCTTCTGCACAGAATCGGCAATGGCGATGACTTCCATTTTACTGC  
GGTCCGGCCCCACCAGATCCAGCTTGTTGACCATGGCATCGAAGCGGT CATCGTGGC  
TGCGTAGCGCCTGCAAGACCTGCCAAACTACGGCATAGGTCTTGTTGTCGTTGAGCG  
CCAGATGCGGCTCGACCCCGGAGGGGATCACTACCGGCAGCACTACATAGCCGCGC  
TTTTTGCCCAAGGCAGTGCGCATCACCCGGCCGACCGACTGCACCACGTGACCTGC  
GAGTTGCGCGGAGTCAGGAACAGCACCGCGTCCAGCGCCGGCACGTCCACGCCTTC  
GGAGAGGCAACGCACGTTGGACAGTACGCGGCAGGTATCGGCGGGCATCTCGGCCT  
TGAGCCAGTCGAGCTTGGCTTCTTCTGGCTGGCATT CATGCCGCCATCCACGTGTT  
GGCTTCGCAGGTCAGGCGGGCGGCATCCTCGATATCCCCGGCCTCCTGATAGGCCTC  
CACC ACTTGCTGGAACATCCCGGCGATCTCTTTCGAGCTGACCTTGTGAGCTTTACC  
GCTTTTGCCCGGCTCGATCACCTGACAGAAGGCGACAGCACGCTTCATGGGCTCCGG  
TGATTCAACGCCGTCTTCGTGGATGCCAGCTTGGCCAACGCCTTCCAGCACCCGAT  
GATCTTGGCCGCATCGTCCACGCGCAGGCTGTTGTTCTCATCTTTCAACAGGCTCTGC  
AGCTTGCGGTTGATGTGGGATTCTTCCACCGCCAAAACGAAGACCTTGTAGTCCACC  
AGCAAGCCGCGCTTGACCGCCTCGGAAAAGTTGATGGTGAACAGGGTCTTCCCGTA  
CCAGTCCTCGTTGTCCATCGAGTACAGGGCGATATTGTGCGGCTCGGCCACGGCCTT  
GGCCTCGTTACCGTAGATGCGCGGGGTGGCGGTCATGTACAGGCGTTTGGCCGCGCG  
GATGATCTGGCCGTCATGGACCCGGACGAAGGCGCTTTCGCTGTCGCTTTCGAAGGT  
GGCGCCGGTGGT GCGATGGGCTTCGTGCGAGACTATCAAGTCGAACTCTGCCAGGC  
CATGGTCGTGCTGAGCGTGATGGATGACGTCGATGGAGTGGTATGTGCTGAACACC  
ACGGTCATATGGTCTGCGTCATGGCGTGCCGCCATGCTACTGGCCAGAGTCTTGCCG  
CTGGTGGTGGCCGGGTAGCGCAGCTCGTGGGCAAAGGTCTGCAGGGCGTCGTCTC  
CTTGCGCCCCCTTCTTCTTACCGACTTCGCTGTCCGAGCACACGGCAAAGCTGTGCAG  
CGGCGTAACACTTTCCTGGGTCCATTCAGTCAGTGACTGGGACAGCAGCGACAGGCT  
GGGCACTAGGAACAGCACGCGCTTGCCCTTGCCGGCGATGTCTTCTGCAATCTTGAG  
GCTGGTGAAGGTCTTGCCGGTGCCACAGGCCATGATCAGTTTGCCGCGATCAGCCTG  
TTGCAGGCCGGCACGGACATCCTGCAGAGCGGCCCGCTGATGCGGGCGCAAGGTCT  
TTTTCGGCTTTAGAATCACACTTGCTTGCTTGGGCTGGAACCTCGACCAGTCGATCTG  
GCTGTCTTCCAGTGCTGCAAATCGATCTTGGTGACCGGCGGCTGCTGGTCCACTAG  
CGCGTTTTCGGCGTGTTCCGACCAGTCGAGCGTTGTGCTGAAAATGATGCGGCGAGC

AAAGGGCTTGCGACCTGAGGCGGTAAAGAAGCTGTCAATATCGTCTTTCCGCAGCTT  
GTAGTCGGCTGCGTAGAACTTGCACTGGATGGCGTGGATCTCGCCGGTCCCGGCCAC  
TTCGGCCACCAAATCAATGCCGTCATCCTTGGCGCTAAAGCCATGGGCGGGCGCCCA  
ATCGCCCCAGGTCCAGACCTGGGAATACAGGTCCTTGTAGGTCGCCTCGTTGCGCAC  
GTAGGCGAGAATCAGCTCCTCGAAATAGGTGCCCTTTTCGCGCTCACTGACAGCAGC  
GGCTCGGAACGTGTCAAGAAGAATCGAAAGGTTCTGCACAAATATACCTGAAGTAA  
TGCAGCCATGTTGGGAGAGCAGGCCGTGGCCAGTATCAAGCACCAACTAGACGTGC  
ATACGGCACCCACCCCGCAATTCTACTTAAGTGACACCACTTTCTACGATCAGCACA  
CAGCCAAGCATACTAGCCACATCATTGGGCACTACCGCATCAACCGGCAGGGCCGT  
GACTTCGCCGTCGGGGACATGTACGGCTGCTTCTGCGCGCCCAGGTTGGCCTTTGAT  
GCCATCAGCTTCGACATCCGATGCGATTGCCTCTTCTGTGTAGACGACTTGGTTAAC  
GGAGGACCGGCGTCAGAGAATGTTATCGAGTGGCTGGAGCAAACATGACTTCCATG  
CGGCCTGCAGCAACCTCGACTTCATGACGTGGCGGCGCGCGCTCGGCGAGTCTTCCC  
CGATGTGGATCACTGGGCACATAGCGGAGACTGGCCAGACACTTGCAGGCCTGAAC  
AAGTGCACGCTATCAGCTATCACCTGTCCTTGCTGTAGCTGTCCATGGAAGTCAAAG  
ACCCTGGGCTTCTCAGGATCGTTCACGCCGAGTATCTATACGACGGCTGGGCACCGA  
TGAGGGAGATGAAGCCAACAACCTGTTCAATTGCCTTACGAATGGCCGCACCTGGCG  
TTTTCCCTCGGTCTCGCAATAGGCGATCCATAGCGCTTTTAGCTCTGGGCCTAGGTG  
CACGTTGATAGCTCTACCGATGGTCTCCAAACGCCTCTCCAATTGATCGACGATCAA  
CGAAGGGTAAAACCTACATCTAAACTGTGCGCACAGTTTAGGGCCATACGGCCTAT  
CCTGCAATGTCCCTTCTGCTTTTGCAGCCTTGTTTTTACTCTTTTCGCTCTTGCTTGAGG  
TGAGATTGATGCAGCAATCCGTTTCGGGACATTTCGTAATCGGTTCGCTGAATCTCATG  
TAGTGCCCTGCGGGCAAAAAACGCCCCACGTTTAGCCATTCAGCAGGATGGCTAA  
GCGTGGGGCGCTGGTTAGAACTGGTTCGCAGGGTGGCCGATGAGACCGTTAGGCC  
AAATGGCGCATCACTGATCCAGCAGTTGAAAACCTCCTCGGCGCGAGTGAGGCGTTA  
TCCGTAGGGGCTCCACCCTACACCCGTACGCATCAGTCCCCTTACCTCTCACCCTCA  
ACAAGCGGTTTATGCCGATTGCCGGATTTCATGGTCAATTTCTCGGCTTCGGCCAGCAG  
ATTGATTTTGCAAGCGCCTGCCTCTACCTCTTGATCGCCACCGCCGTCCTCAAAGCC  
GATATGAATCAGGCCGGCAGTGGTAGGGCGACGGTTCAGCAACACGGCCGCCGAAC  
GTCCGTCGAACTCAACCAGCAAAAGCGGCTTGCTCATGCGGTTCAGGATCGGACACG  
GCCCCGGCCCTTGGGCCAGCTCGTCAGCTCACCGGTATCGCGCCCGCTGTGCGCTTCC  
TCGCCAGCGCCTGCCCCATCGCCCTGGTCGTCGTTCTCGCCCTTCTTGCTGGCTGACT  
TGGCCTTGCTGCCTTTCGTCTTCCGCTTCACCAGCACTGCCGCTATTGCCGCCATGACC  
AGCGCCAGCGCCGGGAGCGGCCAATTCGGACAACAGCGCAATGACCTCCTCATCCC  
GATCAGGACGGCGCTGATAACGCGCCGTCGAGCGAGCCACGCCAGCCACCGCACAG  
GCCCCGGCGCTCGCTCCAGCCATGCTGCTCGATGAGTCAGGCAAGAAGCGGGCGCTT  
ATGCGCCGGGTCTACAGCTTTTTTTCGATGACATCCTTCAGTGCATGGTTTTCCATCG  
CGAGCTCGGCGTACATGCGTTTGAGCTTGTTATGCTAAGTCTCCAGGTCGCGAAGGC  
GCTGCACATCAGCGGCCTCCATGCCGCCGTACTTGGACTTCCAGACGTAGTACGTGC  
CGTCGGAAATACCCAGCTCACGGCACACATCCTTGACTTGGCAGCCGCCCTCAACCT

GCTTCAGCGTGGCGACGATCTGGCTCTCGGTGAACTTGCTCTTGCGCATCATTGGTCT  
CCTTTGTGGCTAGTGTGCCCGGAGACATCTAACTATGACTGGATCGATTTTACGGGA  
GGCTGACACCATCACCTCTTTGCTATCACTCGGCAGGAATTCGTTCATGACGAAAT  
TTTTCGGTCACTGAATGTCATGCAGTGCCCTCCGGGCACAAATAAAGCGCCCCACGC  
CATGCCATCCTGCTGGACGGCTAAACGTGGGGCTGCTGGTTAGAAGCTGGTTCGCAG  
GGTGGCGATGGGATCGTTAGGCCAAATGGCACATCACCGATCCAGTAACTGAGAGC  
TCCTCGGCGCGAGTGAGGCGTTGTCCGTAGGGGCTGCGCCCCTACACCCGCACGCAT  
AAGACCTAACCCCCAAATTCTCGTCCTCAGCCAAACGGTTGATGCGGACGGCACCA  
GCATCAACTAGGTGTTTGATCCCAGGCTTTGATGGTGCCTATTTTCCCTCGATTGGA  
AGGAAGCACTATGGGCCAGGTTCTACACGGGAGCGCCACTACGACAGAGGCGATCC  
GTCGAGCGATACAACATAGTCAAGAGAGCCTGAGAGCGCTGTCCAAGCGCTACGGG  
ATCAATCAGAAGACGGTGGCGAAGTGAAGAAGCGTAGCTCGGTTGCCGATTTGCC  
AACCGGGCCGACGCAGCCGTGTTCCACCGTGTTGTCCGTTACGGATGAGGCGGCGA  
TCGTGCTTTCCGCAAGCACACGTTGCTGCCGCTGGACAACGTCTCTACGCACTAC  
AGCCGAGCATGCCGCGTCTGACGCGCTCATCGCTGCACCGCTGCCTGCAACGCCATG  
GCATCTCGCGGCTCCCCGAGATTAAAGGCGACAAAGCCGCCAAGAAGCGTTTCAGA  
AGTTATCCGATTGGCTACTTCCACATCGACATTGCAGAGGTGCAGACGGCCGAGGGC  
AAGCTCTATCTGTTTCGTGGCCATCGACAGGACGTCCAAGTTTGCGTTACCGAACTC  
CACGCCTCGGCCAACAAAGCTGGTTGCAGCGCAGTTCCTGCGCAATGTGATCCAGGC  
AGTGCCCTAC

>CONTIG\_41\_length\_8958\_cov\_91.475031

GGAGAGAGAAAAGGGGAAGAAAGAGAAGAAAAAAGAAAAAAGGAAAGGAGA  
GGAAGGGAAAGGAAAAGAAGAGGGGGAGAGGGGAAGAGAAGGGAAGAGAGGAGA  
AAAGGAGAAAGGAGGGGAAAGAAAGGGAAGAGAAAAGGAAGGGAGAAAGAAAAAG  
AGAGGAGAAAAGGAGAGAAAAAGAAAGAGAGGGGAAGGGGAGAGAGGGAGAGGG  
AGAGAGAAAGAGGGGGAGGGGAGGAGAGAGGAGGGGGAGGAGGAGGAGAAAGGAA  
AAGAAGAAGGGAGAAGGAAGAGGAGGGGGGAAAGAAGGGAGGAGGAGGAAGAGA  
AAAGAGAAGGGAGGAAAGAAGAAGAGGGGGGAGGAAGGAGGGAGGGAGAGGGAA  
GGGGAAAGGGAGAAGGGGAGAGGGAGGGGGAGGGGGAGAGAGAAGAAAAAAGAA  
AGAGGGGAGAGGGAGGAAGGGAAGGGAGAGATAGAAAGATTGAGTGCCGCGCTGG  
AGCATCCGCATGCCGGCGCATTTGCCAGTTTCGAGGGCTGGGTGCGCAACCATAAC  
GAAGGCCGCGGCGTGGCCGGGCTGCGCTACGAAGCCTATGCCGCACTCGCGCAGGC  
CGAAGGCCAACGCGTGCTCGACGAAGCGATGAGCCGCTTTGCCATCGTCAACGCGC  
ATTGCGTGACCGCGTGCGGCGAGCTGCGTATCGGCGATATGGCGGTGTGGGTGGGC  
GTCAGCGCAGCGCATCGCGGGGCCGATTCGATGCCTGCCGCTTAATCATCGACGA  
GGTCAAGGCGCGCGTGCCGATCTGGAAGCACGAGCATTACCTGGAAGGCGATGCGG  
GCTGGCTGCATCCGGAAGCGCAGACGCAATGACAGCGTTGCTGCCGCTTTGCGAAT  
GCGCACACAACCGTCGCCACATGGGCAGCCTGTTTTTTTGATTAGGGTGGTGTCCCC  
GCCGTTGACCTCGGCGCCCGCGTCAATCGATACCGTTGCTGCCTTCCGGCCCTGGC

GGGATTTTCGATCTAGCGTCGCGAGGGACCGACGGGGCCACCATAAGACGTGGGGCC  
ACTGGCGTGCCCTGGATCCAGGCAATCGCGTTGCAGGATCATAAACTGGCGGAG  
AGAGGGGGAGGTACTGATCCCGATCCAACTTCCTGACTCTCCTACAGCCACGCAAA  
CCAGGAAGGTATCCTGCCTTGTGTTCCGCCATTGTAGCGGGTCCGACTAGCCCCGGG  
CTAGTCCGCTGTGCGTTGAGTTCAACTCAGGCGCTCCGGCGGTGCTTTGGATGCGTG  
CCTCCACCCAGACTGGGCAAGATGAAAGCTCTCCAATTTGCGAGTCTGCGTCGCCAT  
GGGTGAGACAGCGCGGCTGTTACAATGAGCTGCTCACATGGGGCTCTTGACTGCACT  
GCTAATTCCATTAGGTTGGAGTGGTCACCTGTTCAAATTGCTAGCGCATCACTCGGG  
CCTTCTGGAGATCTTCTGTGACCCTGCGATACATCGGTTTGAAGACTCGTTTGTTGA  
GGGCTTGGCACCGCACATTGGTAGATACTCTGGTCGCGGCCGATTCGTTGACGCGTT  
TTGCGGGATGGGCTCCGTGGCGGCCTCTGCCTCTAGGTTGGGGTGGCCCCGTCTTGCT  
CAATGACCATCTGTCTTATGCGACCATCATGAGTGCAGCGCGGCTTACCTCGCTGGA  
TCAAGTTCCGTTTCGCTGGGCTTGATGGCTATGCCTGCGCGGTGAAGAAGCTTAACGA  
ACTCGATGGTCGCCTAGGCTTTGTTTGGAGTGAGTACAGTCCTGCCTCCTTGACAGCA  
TTCGAGGGGCGCGGATAGAGCGCCGCTACTTCACAGAGGCCAACGCGGCTCGCATCG  
ATAGTTGCCGTTTCGCAGATTTTCGATTGGAGCAAAGAAGGGCTACTAAAGCCGGCC  
GAAGAGCGGTTGCTGCTGGCGGACATGATGTCGGCTGCCAATCGTGTAGCGAATATT  
GCAGGGACCTATGGGTGCTTTTTGTCCCGTTGGACCGCGCAAAGCCAAGGAGCATTT  
GTTCTAAGGCCGCGGGAACCTCGCAGAGGTCGGCACGCCTGTAGATGTTTCCGTGGGC  
GATGTGATGAGCGTCGACGTCTATCCAGAAGACACCGTTTACCTCGACCCGCCATAC  
ACGAAGCGCCAATATGCCTCCTACTATCACCTGTTAGAGACGATCGTCCATGGTGAT  
GCGCCGATAGTTGAGGGTGTGCGAGGGCTTCGGCCTTGGCAGCACCTAGCATCGGA  
CTTTTGCTACAAACGGAAGCGCTGGGCGCACTTGTTGCTCTCATCGAGGGCATCAG  
AGCCCAGCGTGTGCTTCTTTCATACAGTAATGAAGGCCATGTGGATCTGGGCGAGCT  
AACCGAAAGGCTTGCTGATCTGGGCGCCGTGGCGGTTGAGCCATTGGCGAACATTG  
GACGGTATCGTCCTAACCAGAAGGCAAGTGCAAAAGCGTCCGAGGTCAGCGAATAT  
CTTGTGATTGTCGAGCCAAAATCGATGGGCTCTGAGAAAAGAAAAACGCAACGGC  
GCGAAAATGAGCTCTCCGGCGACTATTGAACAAGGCCGTCTGCGCGCAGTGGCTGC  
GCTTGTGCATGCTTTCGCGGTTTCGTTTGAGCACAAACCAAGATGAGGCCAGACTACA  
ACTCTTGGAATCGGTCGCGGCACGTCTTGGTTCGCATAACGTGTCGGATTTTCAAAA  
GGCTTTCGGAAGGAAGCTGATTGCCGCCGCTCACGTGTTGGACAACGAGGCAGCCA  
AGGTTCTAGCCGCCATCCGCAATACGGGCATAGAGCCTGCCTTGGCGCTGAGTGCGC  
TATCGAGAGAAGATCTCACCGTTGCGCAGCAGCGGAAAACGGGCGCTTACCACACC  
GACTTTCGGCTGGCCCAGCGCCTGGCGAAGAACATGGCGCCTAGCCTGTCAGTTCGA  
AGCAAAGTGGTGGATCCAGCCTCCGGATCAGGCATCCTTCTTGTGGCTTTGACCCTG  
GCGGTGTGCGGCAACGACCGCCGCGCGACTGCCCAGTGGCTGCGAAATGGCGTGCA  
TGCAATGGACTTGTGAGAAGCATATTGCGCGGGGGCCACGCTTCTCTTGCGGCATT  
GACTGATGACCTAAGTGCCGTGATTGAGATGCGCAGCCGATGGCTGGTTGGCGACA  
GTTTGGCCGTCCGTGCAGCAGCCTGGGGAGCGATGGCGCCCCAGGGCTTCGATGCA  
ATCGTGGCCAATCCTCCATGGGAGAAGGTTTCGGTTAACCAAGCACGAATTCCTCCTG

GATCGGGGAGCTGGTCGACATTACGGTGCCGATGTTGAGCACTTGGACCGCGAGGC  
CTTCGAGACCTCAGCTGGTCAAGTTCGATCGTATGCGGAATTCCTGGCACGCAGATT  
TCCTCTTTTGTACGTGGAGAGCCAGATCTCTACGCCGCCTTTATGGCGCTCTACTTG  
AACCTTCTGAAACCCGGCGGCCGCGCTTGTGTTTTTGGTTCCAGGAGGCCTGATTCGT  
TCCCAGGGCACCCAAGCGCTGAGAGAAGCATTGTTTGACCGCGCGATGCGTTTGGA  
AGTTGCTGTTTTCGACAACCGTGCTCGGTTTTTTGGCATTGATACACGATTCAAGTTC  
TTGGCACTGGATTTTCATCCAGCACGAAGGTGCACAAGCGAAGGACCCAATAGTGCT  
CACCCGAGAGTCAGGGACCGAATTTGGGACGGAAGTGCTGAGTCGAGTCCGGATAG  
GCCGCAAGGCCCTCCGTGCAGTGCGCCCGGATTTGAGCTTGCCTGAGGTCCACAGCG  
CTAGCGGTTGGGCGTTGTTTCAGCGTCTGACCGAGTGTGGGGAACGGATGGACGATC  
CTCGGTCTCTTTGGTATGCCGAATTTTGCCGGGAGGTCGATATGACCTCTCAGAGGT  
CGTCCTTTGCGCGCTCAAAAGGCAAGGAACGAGTTGGCGTGATAGAGGGCCGTCAC  
ATCCAGCAGCACCGGTTTCGGTGCGAAAGCTTATGTGGCTGGCACGGGACGCTCTGC  
AGTATGGGAGAGCCTCTCTTTGGGTGGGGCGGAAGTGGTGCCGCAGTTCCACATTGC  
GCTTAAGGATTGCCCCGCCAAAGCTCAGGAGCGGATTCAGTTGCGGAGGGCCGGAT  
TCTGCGATATCGCTGGCCAAACCAACGAACGGTCAATGATGGCTGCATTGGTAGAG  
CCAGGATTTGTCTGCGGTAACAAGGTGCCTACCGTATTGTTTCCTAACGATCCTGAC  
GAAGACCGTCTTTTCGTTTGGTTGGCCATCGTCAATAGTTTGACCTTCGATTGGATGC  
TCAGAAGGGTTCTTACCACCACCATCAACTACTTCGTTCTTCTGAGTATCCCGCTCCC  
GCCCATCAAGCCCAAAGGTCTCCCATGGAGGCGTTTGGCGACCGCAGCTCGAGAGC  
TCCATGCACTTAACCTGGCTCCCCGAACGGCTGAAACTGACCGCACAGCGGCGCAG  
CTGCGAGTAAAAATTGAGGTTCGAGGTGGCCCGTGCCTATGGCGTCACCCTTGCAGA  
ACTTGATCTAATGTCCTCCGATTTCCCGTTGTTGGATAGGGGGCAGCCCGCTTTGGA  
AAGAGAAGGGCGATCCACTATCACCTGGGATTCTGTGCTCGCCGGCCTGTCCGGCG  
GGAAGGAACCTTGGAACGGCGAGTGGTTGCTGCGCAGGCGGTCTGGGGCGATCGCC  
TTTGTGCCTGCTCAGCATTTCAGGTCTTGAGCCGGAGGAAGGGGACAGTTATGGAGCA  
GGGCAAAGCGAGTCAAAGTAAACGGGCAGGAATCGTCCGGGTTCTGTGGAAGGAA  
ATCCTCCCGGGTGACCTCAGAAAGTTTGCGGCTCAGTCTCATGACGCCGATACAGGC  
GGAGGTGCCCAGACCTTCGGTTCCGCGGAGATCAGGATCTAAAGGCAATCATCCT  
AGACATGTTTCCCGTTCAAGAGCATGCGACCCGTCGTAGGAACAGCGTCGCCACCA  
CAATCACCCGTTACAGGGGTCAGTTCTGCTGGAACCTCCGGAAGCGGCGGGACTAAG  
CAAACCCACTCCGAAGCGGCTTACATTGAGCCCCCGACTAGCGCTCGGGAAGGCGA  
ATGGCGCATTACGCGCGTTTACACCTATGGGGTTTTTTCAGGGATCGGCCCCAGCCGT  
AACAGGGGGGCGACCGTGTGCTCCTGCTGCTGATTTCAGACCGACGACGGCAACATCT  
GGCCGCGCTTCACAACTGAGACCTCGCTTCGCAAAGACAAATGGAGCGAAGCGGTG  
AAGCAGAATATTTTGGGATGTTTGGACAGTAAAAAGTCTGAACGCCGCGCTTCCTAT  
GGCTTCTTTGACCTTCAAAATGGACGCACGCACTGCCATGTTTGATTCCCCCTCTGTA  
GAGGCTCAAGAAGTCCTAAGGCTCCTGGCGTCGTCGAAGAATGTCCTGTTGTCCGGT  
CCGCCGGGCGTTGGAAAAACGCGGCTTCTGTCTGAGATTGCGGCCGCGTTCGCGAAT  
GGCAACCTGGGGTCACAGGGGCAACCGATGTTGAGCCACAATGATGATGTGGCCAT

CCAGGATGCGGAAGAAGCGAAGGTCTTCAGAACGGTTTTTCACCAGAATTCTAAAT  
ATCGGGATTTTCATCACCGGGCTTGCTCCCGCCATAGGCGAAGGAAAAGCCGGTCAG  
TTCACCATAGTTGAGGGGACACTTTTCCGCGCCGCGCAGCACGCGCGCCAGGAAGG  
CAAGTCTTCCCTGCTCGTCATTGATGAAATCAACCGCGGCCCTGCTGTGCAAGTTTTT  
GGTGGCGCCATGGTGGCGATCGAAGCAGACAAACGCTTGGCTCCTGACGGCAAACC  
TCATGAACTCACGCAGTTCTTCGAGGTGATGGTTCCGTCGTCTGGTTTGATTGAAGA  
ATATGCGCTTCCAGACAGGCTCTTTATTCTTGCGGTTTCAGAACCAAGCCGACAGCTC  
AGTGGAGCCGATGGACGTTGCGTTTTCTTCGTGCGTTTCGAGCCATATAGGCTTGAACC  
TAACGAAGCGGTTCTGCGCGCCCATTTCCAGATCGTTGGCGGTGAAGCCCGTGTGTT  
GCCTGAGGTGCCAGAAGCACCAACCGATATTGCAGAGGCAAGCGTCAGAGCGTGGG  
TAGCCGTCAACAAAAGGGTATCCATAGGGCGTGGCAAGGATTTTCAGGTCGGGCGAT  
GGCGTTCTGATGCCAGCTTGGTCAACGGAGCTTTCGATCAACGAAGCTACGACGTTG  
CTGGCGAAGGGCTGGGACAAGGTTGTAGCCCATGTTGCGGAGGTCTTCTATGGAGA  
CATCCGTAGCATGGCGATTGCCCTGAATGCGGCTGAGTCCCTTGACTTCGACGGGTC  
GCCATTGAAGTTGGTTGAGCACACGTTTCGGCACCGAGCTTCGATACGCGCTGGAGG  
GAGATGGCACCTGGACGCGAGACGCTCTGTATTCGGGCCTCCGAAGTATTGCAGGG  
CTGTAGGGCCAGATGGCTCGATTTTCTATCGTTGAGTATGGGGCGCCGGCAAATCTT  
CTTCCTTCCATTGCAGCGTCGATGGGTAAGGGGACTGCTGAGACAGCGCGCCACATT  
TCCGATGTGGGCGCACGGATTGCGCGCCAAGTCGGTCTCAAGAAGTCGCCGATTGA  
AGTGAGTGGCGCGCTCGTGTCTTCCAGCAAGGTCGCAGGCCTCCTTCACTTGGGGCG  
ATCGTGCGAGCTTGAGATTGCTCCCAAGTTCTTGGGCGATAATGCTGGTGGTACTGG  
ATGGCGCGAAGACTTTTTTTTTCTTAGCCATGCTCTCTAAACATGGACACGTTCTAGCC  
TCTGATCGTATTCGAGCGCACACTGCCGCAGAAAGCGATCTCGATTTCGCTGTTGGCT  
AGAGCAATCACCGAGATGTATTGGGAGCATCACCAACGCCCAATCAGATCCTACAA  
AAGGACCATCGAGCACGATTTTTTCTCGACGGTGACGTTGACCCGTTTCGACCTGCG  
TGTCCCCGGGCCATCTGGCTATCCGCAGGAAGTGATCCGCTTCAGCAAGGCCAATCG  
ACACAATGCTGTGATTTGCGCTGCCGCAGGCATCGCCAGCCGACACGTCCGAAATCC  
AACGTCCAGCGCAGAACTATCAAGAGTAAGGGCACATTTGGGAGCCCAACCTCGGT  
TGCCCCATGGGCACTTGGTGCAGCAGTCAGTGCCCGGACGTTACAGGCGTTGGCAG  
GCATTGATGGATCTCTCTGTTGACGTGGTCAACGGGTTTGGCATGGGATTCAACGAA  
GGAGAGGCAAGGGCGCCGGGCTTCATAGTGGGGACATGGCAGCTTTGGCAAGACTT  
ACTCACGATTAGTCTCCGCCTAGCCTTTGGGGCGAGCAACGTGCGAACTGAGCAACC  
TTTGGTTCTGGGCAAGCGACTTTACCCAGGAGGAAGCACTGGCAGGTTGAATGTGA  
GGCCGGATACATCAATTTTTCTGGATGGATGGCGGTTCCACCTGGATGCGAAATACA  
AAGGCCGCGTTGACCGTGGTCAGATGCGTGCGACTGAGTCGGACATTTATGAGGCC  
ATAGCGTTTTCTATGGCAAGCGACGATTGCCGGTGATATTGGCTTACCCACGGCTA  
GCTTCTGCGTTATTGCTTCCTGTAGGGACGGTGGAGGTGTTGGAGCAAGTCCGCGTA  
TCTGGCTGCGGAGTGATAGTCGCTGTCTGTGTTGAAGTGCGTGGCATATCAGGGCGC  
CGTGCACTTCAACGCTTGGTTCACGAGTTAGGGAAGAGCCTAGCCAAGCTAGCTGA  
ACTATTGAAATAGTCGGGCGTTGTAGGTTATGGATGTCCTTGCGGAGTTCATAACAG

ACCAACAGGAGGGTCTAATGGCAGCAGTAATGACGGCAGGTATTTACGGAATCCCG  
GAGCGGATTCTTTTTTAAGACACTCCCCGATGGGGATTGGAAAAAGTTTGTTGGTGCA  
TCCAACGATGATCCTAACGCTGGAGGCGGAGCTCGCGACCTTCGATACAACGGCTTC  
CGCGACTTCGAGGGCTATTGCAAAAGCATTTTTTCCCACCGTCACCCCTGTTTCCCGG  
GTCAGAGGAGGGGTCGCGAAGACGGTGAATGCTTATTCCGGCAAGTTGCTGCACGG  
GTTCGGCTCTCAGCAATTTGATGGAGCGTCGTTTGAACCCCCTACCACCGCTCGAGA  
ACTTGAGTGGAGATTCGTCCGTGTAACCAGCCAAGCCCCTTTGAACAATGCGCATTC  
TTCAGCGGGGAATGGAGATAAGGACATAATTGTCCTGGTTCAGGAAAAGATTGGAG  
AAGTGGTTGCTGTTTTTACAACGCTAAATACGCTGCCGTCAGACAACATTTCTGCAT  
TTATAGCAGCTGCCTGTGCTGCTCCACGGCATTTCGAATTACGCAGCTGCTGGCTTCTT  
AGATCTGGTTACCGGATATCAAGAACACAATTGACTCGCTCAATGGAAGCAACGGA  
GGCAACTTCAGTACCTCCGTTGCTTCTAGTGCGGTTTAGGCTAGAACTAAGAAATC  
AGCGTCGCGTAAATCACATACAGCAACATGGGCAGCCCGCTCAGCATCGATGTAAC  
CCAAAAAGCTCCCATCACGGTCAGCGGCGTCATGACCCACCACTGCCACCAGCTGA  
AGCCACGATCGCGCTGGCGGGCCATGTGAGCCTCGAAAGCGTAAAGGCGCTCTGCT  
TTTCGCAAACCTCGCCGAGCCATGAGCGGCCCAACGATGAAGCCTAATGGGCCTAG  
GAAGAGCAGGCTGAGCGAGAACCACCAGAAGAATCGGTTGTGCGGGGTGGTCACCT  
TTTTGGGGGCGAGCGCGCATGGCGCTGTCTTCGAGGAAGCCGCCACAGCGCCAGCG  
GACGTTCCCAACATCGAGTCGGGTTGGGTCTTCATTTGGCGTAGGCCCTCCAGGTGC  
CGTCGCTCTTGGCGTAGCGCAGGTTCTTGCTCACGGGGATGGGTACTTGGCGGCCTC  
CGATGTCGATCGCCACCTTGCCACTCGTGTCGCAGCGTTA

>CONTIG\_42\_length\_8859\_cov\_285.543747

TTGCAGCAGTGCGTTGCTGCACCCGTCACCAACACTCGCCACCGGGGGGTGCCATGA  
CACGCCGCCGCCACCCAACGCGTCCGCCACCGCACGGCCACCCGTCAACGTGCGC  
GCCCCGCGCCACCCAAGCGGGTGCAAGTGGGTCATCGTCGAACCCGATCGCACCCAG  
CTGCCACCGATGCTGCCGCCGAGCCGGACACAACGCCGCAAAGCCCCGGCCGTTT  
GCATGCACCCCGCCGCGCCCGCCGCCCGCCGCAATGCACCGTCAGCTACACCTCTA  
CCCCGGCGCCACGACCACGCCGGCGACCAGCACGTGCCCCACGTCCGCCTTAGCG  
GTCTATGGCTGGAACAATTGGGCTTTGCCATCGGCACCAAGCTGCGGATTACTGCCA  
GCGCGGGGCGAGTTGGTGATAGAGGTGGTGGCGCAGGTGGAGGTGCCGTCCAAAGCA  
CGCGGCGTGCGGCGGTGATGCTACCGCTGCCAGGGACCTTGCGATTGACCTCAGTGC  
CGCATGCCACTAGCGTCGCAGCCACACCAGCGCACAACGGACGCTTCATGATCGCG  
CGGCCCTCTACGCCTTGCTCGCCACCTCGCTCTGGGCGCATGCGCCCACACGGCG  
GCCACCCACAGCCCCGGCAACCGTCACGGAGACATCTGCCATGCGTTTCCTCACCCGAT  
TCCGCAGTCATTCCCGCTGGCAGTGAATCTAGCGGGCCGATACGAACGGCAGAGGA  
TGCGCTTACCCGCATGCTTGCATTGATTCAAGCGATTACGGACTTGACGATCTGAC  
ACCTGACTACCTGCACTCCAAAATGGGGGTTCGGTGACGCATGCGGCAACAGATC  
CCAAGCGTTACGGCGCCAGTGCTCCGCTTACCAGTGAATGGGGTTACAGCTTTGGCA  
TGGACCAGACGCCTACTGCGGGGCGTTGGTTCGAGTTCACCTTTGTTCCAGCGCAAG

CGGGTGCTTCCCCGCCCATGACGGAGATCTGCAGGGTTCGATTTTCGATACGTTTACCA  
AGAAGCTAGAGAGCATCGGGTTTGTGCGTCAACGCAACATGGTGGAAGACGGGCGA  
TGGATGAGTGACTTCTTCAGTCGCCCAGGCATGCGCGTGGAGGTGTTTCCACGAGGT  
GAGGCCGATGCGCCGCAGGAGCGGGTGGAGCACCCTGCGTTGAATGGATCTACAT  
TCGTTAATCCAAGGAACGGTCATGCCATTGAGTCCACAGGCGCAAGCGATTGTTGAT  
GACTTCGGCCGCCAGCCAGGCGTCAGCCCCGAACATGTCGTCAATTTGCAGGGTGTG  
CTCGCCGCATCGCCCGTTTTGCTTGACCAATTCAATGAGGCGGTTGCCAAGCAGCGC  
GTGCTCGGCCTAAAACCCCTAACCGACCCGAATGCAGGCGGAACGTTACGCCGGA  
TGATCATTCCATCCGGCTACCTCTGGCCAGGTTGTCGAATGGACCTGGCGGGAAGTC  
GCTCGACTCCGGTGAGATGACGTTTGTACTAGGCCATGAATTGCAACATGGCCTATA  
CAGCACAGCCGCAGCCGCCTCTCGCAAAGATTTGAAACCGCTGCGGTGCAGACAG  
CCAAGACCACGCACGACTATTCTGACGCAGCCGAGAAAGTGCTCTCAAGCAACCGT  
ATGGATGAAGCGAGTGCAGAAATCGCAGGCTGGAATGCAACCGTTAGCAGGGTAAG  
GCAATCAAATCCGCATGCTTCCTTGGAAGATATTTATCGGGAAGCGCCAGGCCGTAT  
GCATGACTTCATTGATCGGACTGGCGGAATGCCGCAATTTAATTACGCGCTCAAGTC  
CAACCTCACCTTGAACGCAGATAGGACGATGCCCGCCAACGCTGCCAACGTCGAGG  
CAATGGGCGTCAACTTCTTCGACAAGGCTGCCAAGAGCACTCGCATTGGTCACGCG  
GGGCAGTCTGACTACGCCAACCCTACGGCCCGTGGGTGGTTGAACAGCTGCCATCT  
ACGAGCGTCACTACAACAAGCCCAGGCCCGGCGATCCAGAACAGCCAATGATCCTG  
GACATGCAGCGTCTGGGATTAAAAGAAGAAGTACTGGAACGCAACGGCATCGACCT  
GGGCAGCGATACGCGCCCCATGCCTTACCTCGACAGCAGCACGCAGCCACCGACGC  
CCGGCCTGTTCCAGCACAGCAAGAATACCCACTTGCACGTGTCGCCAATCTCCGTGC  
AGGAGTTGGAGCACGAGTTGCGTGAGCGCGACCCGCAATCACAATCATCACCGGCG  
CTGTGCCCCCTCGCAGCCTGGCCACGCGGATCATGCGCTGTACCAACAGATCAAAGG  
CGGCGTAGAAAAGCTCGATGCGCAACATGGCCGGGAGTGGGATGCATCGAGTGAGC  
GCATGACGGCAAGCCTGCTTGTGCTCGCAAAGGAAGAAGGCTTATCGCGGGTAGAC  
CATGTGCTGCTCAACAACCCGACAGACAAGCTCGCGGCCGGAGAAAAGGTGTTTCT  
GGTGCAGGGCACCCAGAGCGATCCAGCGCACCAACCGTGCCGACATGGCCACTGTGC  
AGGCAGTGCAAACGCCTGAAAACCAGTCGTTTCGAGCGCGTGCAATCGATTAATCAA  
GCCAATCGCAGGCACGGGAGCAGCAGCAAGCGCTTGAGCAATCGCAACAGGAAG  
TCCCTCCGCCTGGACCAACGATGACGCGTTGAGATCGTTTGCGGACATGCTTGCAAA  
GGATTGATCAATTGCGGAGATAGAAGGTTTTTCTCAATTTCTTTGCGCAAGTCCGCT  
CCCCACAGCACCCAAACCGCCACCGATGCTCGCGCCCGAGCCGGACACAACGCCGC  
AAAGCCCCGGCCGTTTGCATGCACCCCGCCGCGCCCGCCGCCCAATGCACC  
GTCAGCTACACCCTCTACCCCGGCGCCACGGCCACGCCGGCGACCAGCACGTGCC  
CCACGTCCGCCTCAGCGGCCTATGGCTGGAGCAACTGGGCTTCGCTATCGGCACAAA  
GCTGCGGATTACTGCAAGCGAAGGGCAGTTGGTGATGGAGGTGTTGCCAGCGGTGG  
AGGTGCCGGCCAAAGTACGTAGCGTGCGGCGGTAGGTGGAACGAAGTCGCAGTCAC  
GGTATCGTGCTTCAACGCGCCGACCGTCCCGACCAAGGAAGCTTCATGATGACAAC  
GTGAAGGAAGATGAAATCTCAGGCCTTACATGACCACAATGGTGGCCAGGTATGCG

GATGTTGATTGCTTTCCTACCATTAGCACTTCTCGTACCTAGCTGTAGCGCGGTGTCA  
GCGACGAAGGCGCGTCAGCCTGTTGCATATCCCACAGAACTCCATGGCGTATGGGA  
CTTGGGCAAGGAATTCTCATGAAATTAAAGTCTGTTAGCTGCGTGACGCTTGCGCTG  
CTCTTCATCACAGGATGTACGGCGGTCTCCGCTGGCGCGGACATGAGTGCTCCATCC  
GGCGACTCGCTTTGTGAGCAGTCACGTGGATGGGGGAGTGCAGGGTCGACCCGAGC  
CATAAAAGGGAATCCACAGGTCTCCGAAGATGATAGCGGGCGTTCTTATCGCTTTGA  
TCTGGGTGGGCGAGGCGGGTTGCAGCGCTTTGTTGCTAGTTGTGGATGGGGCTCGTA  
TGCGGAATGTAGCTTTGAGGTGGCCCAGTCGGACGGGACAAACTATCGCTTCTCAGA  
GATGTCCACGTTTGGCCTTTGGGAGACGCAGCAAGGGCTGTATCTTGTCTACCGTAT  
CGTTGCGCCGAAGGACAAGGCCGCAGAGGGAAAGCGGAGAGTCGTGAAGGTGGGT  
AATCCGCCCCGAGAGATGTGCAATCAGATCGGGGATTATTCTAATTTAATGTAGTTT  
TAGATAAGGAGATCAGTGATGCCTATCAACTATCGCGAGCTTGTACCCCCACCGTC  
TTCGTAGATCGGTCTGGAAAGCGCAGCAATCCGAGGTCGCTGTGCTGGCCGGAACA  
GGACCGGATCAGCCGGGTGGTGTAAC TTGTCCAGCCTGGACACGTTGAGGGTGCAT  
GGCGATGAAGCGTATTGGACATAGGTGTTGGGC ACTAATTTTTGCAGGATTTCTTCT  
GTTGCCTGGGTGCGGTAGAACACAGCCGGAAGCTGGTAGCCAACAAGCGGAGGCCA  
CTGCTGCAGCCCCTAGTCCAACGCCAAGTTCTGATGTGCGCCGCGCCGCAATCGTCCC  
AGGTTGGGATCGGAACCTATGTCACCGAGGGTGGTTGGGGACGTCTGGTCATTGAG  
GCACCAAAATCCCAAGGATTTCCGACGTTTTTCATTGGACACAGAGAATGTCGATAGC  
GGGTGTACGCTTTCTGGTCAGTTGGATAAAAGTGGCAGTGGAGTCGTTTACGAAGGT  
GCGACGCCAAGCCAATGCTCACTTGCGCTGAAGGCGGAGCCGGGTGGCGTGGCCGT  
CAATACCTCGACCAAAGCACAGTGTGAGGTCTATTGCGGAAGTAATGGTAGCTTCGA  
GGGAAGCTACAAGCGCGTGTCTTCAAGCTGTGCCGCGGATGCAATCGAGAAGGCGC  
GTCATGACTTCAAGCCTCTCTATGATCAGAAGAAATACGCTGAGGCCAAAGCTGCGC  
TTGCGCCTATTTACCAAAATTGTGTGAAGACGATGGGCCTGGCCGAAGAGGGCGCA  
CTACGAAACGATTACGCGCTAACGCTCTACAAGTTGAAAGATAAGTCGGAGTGCCT  
GTCGGTTCTATCCAAATATAAGCAAGATACTGCCCCGCACGGATGACCAGATTTCCGA  
TGGGATGGCGCCAGCGGTGCTTGACGACTACTTGGCCGTCATCCACGCTGCACGCAC  
GAACATAGCGCTTTGCAGCCGTTAATTGATTGATTTCGTTAGCCAAGGAGAAGGACAT  
GCCACACGAAACAGGACAACCAGCGCCACCGCAGCTGAGTGACAACGAACTCAA  
ACGCTTGCTTATTTTGCATCGGCGTTGCTTCTGAGGGAAGCATGGCAGGCAAGAAC  
GTTGCCTACAGGCTTTTCATTTGCGGGCTCCATCAATGACGGCGTGATGAAACCCATC  
GGAAATAGCGGGTTTTCAATCGGGACGCTGCAAACCGATCTCGGGCAACATCCAGA  
TGTCGCCACTGGTCTGGTTGATGCCTATCAAGGGTGGGCCAGGCAGCAGACACCGG  
CTGTTGCTCTTTCGGAGCAGCAGCGCACGCAAACCATCCATGACCTGCAGCGGGATG  
GCCATGCCATCAAGGCGGAGAATGGAAGAGCCCTTGATGGAACGGTTAAATCAAAC  
ATTGATCGCTTCCTCGCCTCTGACGAGGGAGTCGCATTTGTACATGAGCATGACCGC  
GCACAGGTGAGCAATTGATGCGACCGGGCGATGGAGCAAAAGATCTTGGCAGTGC  
AGTACAGCAGTTACGTCAGACCGATCTGTATGCAGAGTCGAGTTTGAATGATCAAGC  
AAAATTGGCAACGATGATCATGAAGCTTGAAAATCAGGCTGGGCGCGGCCGCTATC

CTGGCGTACTGCAGAGTATCAATGACGGAACATTGCAGAGTGTCGACGATGTAAAG  
ACGCGGATCGATGGCATGCTTCCCAACAAGATCGTCAAAGGTCACGAGCAAGCGGA  
CTACATCGAAAGTGGTGTAGAGCATGCGCTTAAAGGCACCGCAGTCTTCAATGCATT  
GCGTGGGGCAAACCAGGCAAGCCCCTCTCTACCGCGTACGGAAGCGTGGTGGCCG  
ATCCGCTCATCAATCCAACCTGATGCACACAACGGCCGCGGTGCTGCTGATGTATCTC  
ATCACTACGGTGTGGTTAAAACGTTGTTCCCTCCAGAACGCCGAAGCCCCAGCCTTTA  
TTCAATCAGTGGATCAAGGAGCAAGTCATGCCTGGGGACGCCCGAAGCCGAGGGA  
AAGAGTGGACCTACCGCAGGTCTTTACGCTTCCGGCAACGATGTTGTCGTGTGGAAT  
CGTGATGGTCAGGGCCACGCGGTTGTTGGTGGTGTGTGGTCTGACGCATCGCGGGCA  
AGTCTGAGCCGTGAGCGGCACCAGGACGGAACGACCGATATCAATCGTACAACTC  
GGATGGCTCACATGAACGCCTCCTCCATGTTGATCCGCGCGCAGTCCCGTTGCGTGT  
ACGAGGCGAGGCGGTCCAACCTGAGCGGCATGAGGCGCAGCCTGCAGTGCCGACCC  
ATGGCTCACTTGGTCCATCACAAGACCCCCTTCACCGCCAGGCGGAGGACGCAGTG  
CGCCGTTTGAACAAGATTTGGGTGCGAGGCTATGACGACAATAGCGCCCGACTGGC  
TGCCAGTTCTGCCTATCTTGCAAAAGAGAACGGATTGTCGCGGATCGATCACATCAT  
GTTGAGTGAGGAAACAAAATCTATCCGGCAAGGCGAGAAAGTCTTTGTAGTCGAAG  
GGGCGTTGAACGATCCCGCACACAAGATGGCGTACATGAAGACGAATGACGCTATC  
GCACGGCCGTTGAACAGTCTCTGGCGCAGTTGCAGTCTTTAGGTGAGACGCAGCG  
GCAGCAACAATCCCAGCAACAAGAGCAGCAACGCGACCAGTCGATCACTCCACCGC  
CTCGGATGGTGTGAGAGCGCTGCATTCTTTCTACGTCACTGGAACGTCTGGAGACCG  
GAAAGGTTTAGAGCCTGCTGACACCCCATCGCCATTGGCTGTGGCGATGGGCTCGCC  
AAGCGATGCATCACGGCAGGCGAGGGCTTCTACTTCGCCAACGGCTGCAACGCCAG  
CCAGGCATGGAAGTGTGACGGCTTGATTGATAGCGGGCGATGTTGCCTTCGTGTAG  
TTGGTTCAACTCGTTTACAGTCAGTGCTAACACGTCTGCAAACTCTTGCGGATCGGT  
CAGAGCCGCAATCCGATGTTGGATGCCGGCGAGGTCGTTGCGCCGGATGCCGGTCT  
GGATGATTTCTGCAACGAGTACACGTAGTAACTCGCGATGCTTCAGCCGTAGCGGTT  
CCGGCGCGGGCAGTGACTCGCGCACGATGGTGTAAACGCTGGCACGAGCGTTCGTAT  
GCCCACGCAAAGACATCGCGCAACAGGTCGATGCGATTGAGCTCGTAGATGCCAAG  
CGTTCCTTCCACATAAAGCTCCTCGGGTACATCGACGAATGACAGTGGTGCCAGGTT  
CTGTGCAACGAGTGGAATGTTTGCAGCCAGACGTGAGGTGCGCTTGTTGACGTCATC  
GAATGGCTGCAGATAAGGCAGTTGCACCATGGCAAAGAACGCCTGCTCAAAAGGGT  
CGACGATTGCAGTCGCTTTTGCAGCAACGTGTCGAAGTGCTCGGAGATCAGCTGAG  
GAATTGCAAGTGGAAGATAGACCGATCCGGAAATGGCCACTTCGTTTTTCCGCAGGC  
GTCCACCGGCGTCAGGATCCGGCAACAGGTTGTCCGATAAAAGTGCATGCAGGTTCT  
GTAGCGTGTAACGGTTGAAGCCGATCTCCTGCGCCTGCTCCACCAGCATCTCGATGG  
CAGCCTTATGGTTGAGGATCATCTGCGCTTCCAGGTGATCCTTGCCCGCCGCGGCCA  
ATCCGAAGTGGATCAGATTCTGGGTATCAAGGCGACTATAGGTATTGCCTTCCAAGC  
GGCTCGATGCCCACGAGAGATCGATCAGCAGCCGGTCTAGCACTTGCCGCGCATAT  
GTGCCGGCAGGCCGGCCTTCCACAGGTGAGCGACCGAGCTGGTGCAGGTGCGCACG  
CAGCGAGGAAGAGAGATAGGCAGTTTGATTGGGTTGATAATTTTCAAGAAATTGTC

GCTGGTAGCCGACCGGTGTTTCGGCGGGGCAAAGCGCGTCGGATGAGATTGCGAACC  
TGCGCCGCCTCCGCGGTAATTGCAATCTCGGTATCGGCTTGCGCTGTTGGCAATTGC  
TCCAGCCCACGTTGGGCAATGGTTCGGTACTTTCGCGCGCGCGCGTTCCTTCGACT  
ATCAGGCGGCCCTTGTTTCGCAAGGTCGGCTATCTGGCGCTGTAAAGTGCGGGCGCGCC  
ACTTGTGGGAACACCGCCTGCAGCGCTTCGATGCCACGCGCCGGACTCGGCAGC  
GATGGCATTGAGCAAGGCGGTTGGGTTCGATGGAAGGCTGGCGAGCCATTGTTCTTCC  
GTAGCAGCCATTTAGTGGCGCGATTTAAGCGCATTCTGGCGCGATACGCCAAATTGT  
GGCGCGATTCCGGGTTATTTGGCGCGATTCTGGCCTCAAATGGCGCGATTCCGCGTG  
TGAGACCGCCTGCCATCGCGCCATTGAAGAGCATCGTGGCGTACATCTGCCAAAGG  
TCCCGCGCCCCGGCACATCCGCTGCCATCCTCTGGCCGCTCATCCACACGTCTCAGGG  
TACGGGTTTGCCCCGCGCTTGTA TCTCCAGAATCATCTGCGCCAGGTCGTCTTCTTCC  
GCATAGAAGTAGGCCACCGGCACATCGAGGGCGTTTGCCAGCCGCTGGATGGTCTG  
CAGGTCGGGCTGGTGGACGCCGGTCTCGTAGCGGTTGACGCGGGTGCTGGCGACAA  
AGTCGTCCAGGCCGGCCTTGATGCCAGGTTGCGCTGCGACAGGCCGTAGACCTGG  
CGCGCCTCGCGTAGCCGGCGGCTGTACACGGGGAGCTGTCGTTTCTCAACCAAGGG  
GGTGC GCGTCCCGGACTTCGATGCACGGAAGCTTCCGAAAGCGGGCTTGACTTCGAT  
ACTACGGTAAACGTAGTCTTGGTGTGATGGCTACGTTAAACGTAGTTGTGACAGTGC  
CTGCGGTGGCGGCACCAATCATGAGATAGCGCGTCGGGAACACCGTAGGCAGTGGG  
GGAAGTGCAACAACTTGCGCAGTGATGGCGTGTCGGGACCGGGTGGGCACCGAGGC  
GCTTTGCGTGCGCGATGACTGATCGTATGGCAAACAGTTAGCAATAC

>CONTIG\_43\_length\_8717\_cov\_323.381141

GCGCAGCATCGGCGGCTCAGCGCTCACCGCCGACATCGACGTGCCCCGATGCCGGCG  
GCGACGGCATTCCGGTTACCTACGTGCCTGCGCGCAACACCATCATGCTGTCGCTCG  
CGCTGGGCTGGGCCGAGGTGATCGGCGCCAACGACCTGTTCTGCGGCGTCAACGCG  
GTGGACTATTTCGGGCTATCCCGACTGCCGGCCCCGAGTTCGTACGCGCCTTCGAAGTG  
CTGGCCAACCTGGCCACCAAGGCAGGCGTGGAAGGCGCCGGCCTGCGCGTG CATGC  
ACCGCTGCAGTTCCTCAGCAAGGCCGATATCGTCCGCGAAGGCGTACGCCTGGGCG  
TGGACTTCGGCCTCACCGTCTCCTGCTACCGCGCCGACGCCGACGGACGCGCCTGCG  
GCCACTGCGACGCCTGCCGCCTGCGCGCCGCGGCTTCACCGACGCCGGCATCCCGG  
ACCCACCCACTACGCCATTTTCGTCTTGACGCCGGTG TAGGGTAGAATGCGCACCCC  
GGCGCACTGCCGGGACAGTGGGCCGTTAGCTCAGTCGGTAGAGCAGAAGACTTTTA  
ATCTTTTGGTCGATGGTTTCGAATCCATCACGGCCCCACCATATCGTTGTCCAATAGCAT  
ACCAGAAAGGCCGGAAAGCCCAGCAAAATCAAGGCTCCCGGCCCTTTTAGTGTCCG  
CAGCGGTCCGATACCGGCCCTTGAAATGCGACGGTA ACTGACAGTAACTTTGACGGT  
AACGAGAGACCCCGCCAGGCTATTACCGTCATGCCACTTTCCGATACCGCCATTTCG  
TAAGGCCAAGCCAGCCGGCAAGCCGCTGAAGCTTGCCGATGGCGGCGGGCTCTATC  
TGCTGCTGAAACCCGACGGCGCGCGCTGGTGGCGCTGGGACTACCGCAGGCCCCGTC  
ACTGGCAAGCGCAATACGCTGAGCCTTGGCACGTACCCGGATACCGGCCTTGCCGA  
TGCCCGGGAGCGTCAAGCCCATGCACGCAAGCTGCTGGCGGCTGGCATTGACCCGG

GTGAGCAACGCAAGGCGGAAAAGGCAGCGACCCAAGAGCGGACCGCCAACACCTT  
CGCGGCCGTTGCCGCCGAAGTGTGACCCAGCGCGCGAAGAAGCTGGCCGCAGGTT  
CGGTGCTACGGGAGCGGCGACTGCTGGAAAGCAACCTTGCCCCGTACATCGGGGAG  
CGCCCCATTGCCAGCGTGAGCGCCCCCGAAGTGTGCGCGGCCCTGCGCAAGGTGGA  
AGCGCGTGGAGCCGTGGAGACGGCGCACCGGGCACGCATGCTGGCGTCGCTGGTGT  
TCCGCTATGCCATCGCCACCGGCCGTGCCAAGCGCAACCCGGCGGCCGACCTGCTG  
GGTGCGCTGTCCCAGCCCCAGGGCACGCATTTTCGCAAGCCTGACCGAACCGGCGGA  
CGTGGCACCGCTGCTGCGCGCATTGCACGGCTATCAGGGCACGCCGGTGGTCAATG  
CCGCATTGAAGCTGGCCCCGTTGTTTTTCGTGCGACCGGGTGAGCTGCGCCGCGCGC  
GCTGGGCCGATATCGACCTGGACGCGGCCGAATGGCGATACACCGCCAGCAAGACC  
GGGACGCCGCACATCGTGCCGCTGGCAACGCAAGCCGTGGAAATCCTGCGCGAGCT  
GCATCCACTGACCGGCCGGGGCGAGTACGTCTTTCCCGGCATGCGCGGGCGCGACC  
GGGCAATGAGCGAAAACACCGTCAATGCCGCCATGCGCCGGATGGGATTCGACGGC  
GACACCATGACCGGCCACGGGTTCGGGGCAATGGCGCGGACCATCCTGGATGAAGT  
GCTGGGCTATCGCCCCGACTACATCGAACACCAATTGGCCCACGCCGTGCGCGATCC  
CAACGGCCGCGCCTATAACCGTACCGCCACCTGCCCGAACGCCGCAAGATGATGC  
AGGGCTGGGCGGACTATCTGGACAGCCTGCGCACGGGCGGCAACGTCGTGCCGCTG  
CGGGCCAAGGCGGGCTGATCCTACCGAACACCCACCTAGCCCCAGGGGGCGAAAAG  
CCGGACACCCTGCCGGCCTGGCGCGGGGGACTTTTCAGGGCGCCGGGGAGCGTGAT  
GGGCATCATCGTTGAAAATCGAGAGTGGGCCGCAAATGCTGATAAGCATGGCGAAG  
CCATGTATAAAAAGACAAACAATCCGTATTACCTGATAAAGGCATTAGCTGCCGCC  
AGGCTCGTGAATTGGGAGCCGCCTGCGTGGGCATTAGCTCCTTTGCTGGATGCCGTT  
AAAGACGCCTATTTTCGACACTCAGGACCGGGGAAAGGACTTGAGTATCGATGCACG  
CATTGGATTGAAGCCCAAGAGAGGCGGAGTCAGGCCCTTGCTTGCCTCAAGGAAAA  
GTGACGTGGAAGCCAACGTTTTTCGCGACATTAATCTGATCCGCGCCTGTTTTGATG  
TATCCATTCCGGACATATGTGAGCTAATCCATTCCGCAATTGCTTTTCGACTTTTCTCG  
GTCGTATGCCGAAATAATCTCAGGCGCATGGGAGATGAGTGATGATCACCTCAAAT  
CCATTGGCATGAGCCGTGAGCAACATGACGATGCGATTTGCAGATCATTGGAACGA  
GATGCCGAAATTATAAATGATCAAAGAAACAGCCCCGGCCATTCGGAAAAAGCTAGA  
GAATTTTGATTTTTACTCAATAAGCACTGGCTTGATTCTCGGCTATGGATGCGAAACT  
CTGATCGAAAAATTCTATAGGCGCGACAAGTCCGACGATATTATTCCTACAGAAGGT  
ACGAGTGAATACGAATTAATCGTATATTTTGATGGCTACCGACTACTCAACTCAGGC  
ACATGCAGGCGTTTCTGTTTGGACTCCGTACCTATCTCGATGCATGGGCCTAGTCAG  
ATTGATCGACTGCCATACAGAGATGGCTTTGCTTCGCACGTTAAGCGTTTCAATCAA  
GTGCGCCACCCCGTTAAAGATACGCCCTATCGAAATAGGGGATTTGCTTCCAGTGA  
CTGGATAAGGCGCGCACGACAACCTATCTGCACCGCCGCCTAGCGGCCACACGGTG  
TAGCACATGGATACATATGGACACAGGGAGTTCCGCCCCTTCATCGCGGAGTGCAA  
CAAGGTCGGCATCGGCCGATCCAAAGCCTATGAGCTGGCAAACGCAGGCCTTCTCG  
AAACGATTAAACATCGGCAGCAGACGATTTGTCTACCTAGACAGCCTATACACGCTTC  
CACAGCGACTGGCACACGGCCAAGGGTGGTCAGCATGAGCGCCAGCACGCTGCCCG

AAACGGGCTTCCTGCGACTGCCCCGAAGTCCTGCGGCTTTACCCGGTGAGCAAGTCCA  
CGTGGTGGGCTGGTATCCGCACCGGCAAGTATCCGCAGCCCGTCAAAATTGGTGAG  
CGGTGCACGGCGTGCGGTGCCGAAGATATCCGCGCCTTGATTGATAGCGCCGCCCC  
GGCAAGGGGGCCTGACCATGACCCAGAAACGACAACGCCCCGGCGGCTATCGGGGG  
GCAGTGCAAAGCATGTCGCAACTCTATGGACATTCTGCCAGCGCCAGCCGGGCCAG  
GGAACGAGCGCGATTGCAGGAAAACCTGGCGCGACCGTCTGCCCCGTTCTGGCAGTT  
ACTACGCCCCGGCAAATCGCCAAGCTGGGCAACGCGCACGGCAACGGCTGGGCGCAG  
GGGCAGTGCCCCGTTCCACGAAGACCGCAACGCATCGTTTAGCGTGAACCTGTCCAG  
CGCGCGCGGCCCGTGGAAGTGCTTCGCAGGCTGCGGCAGTGGCGACCTGGTGAGCT  
TCCACATGCGCTTGACCGGCCTGGACTTCAAGGAAGCTGCGCGCGAGCTGGTGGGG  
GTGCGGGCATGAACGCGGTTGTCATTGAAACGCCGAAGGACGCCGCGCGCCGGGTG  
GCCGCCAGTTGCATCCGCGATGGCTTCAAGCCCCAAGCTCTGCACGAATACCGCGAT  
GCCAGGGAAACCCTGTGTTCTGGCGCATCCGCTGCAAGCGTCCGTCGGATGGCGA  
CAAGTGGAATTCGACCGATGCGCTGGGATGGGGCCGTCTACGTCATCGGCGAGCCGC  
CAGCGCCGGACGCGGGCAAGCCGCTGTATCGCCTGCCGGAGCTACTGGCTACCAAT  
CCAGACGCAGTGGTGTGGATTGTCGAAGGCGAAGCCTGCGCCGATGCCCTGGCCAA  
ACTGGACCTAACCGCCACGACAAGCGGAAGCGCGGATAGTGCTGATGCAGCCGACT  
GGACGCCGCTGCAAGGCCGCGAGGATGCGCATCTGGCCAGACCACGACAAGGCCGGC  
GCCGGGTATGCGGATAAGGTGGAAAGCCGCCTGCGCGCGCTGGGCTGCGCTGTGGA  
ACGGGTGGACGTGGACACGCTGGACCTGCCGGCCAAGGGCGACTGCGTGGACTGGC  
TCAAGTCGCACCCGGATGCTGACGCGGTTGACGTGCTGTCCTTGCCGCTGGCCGAAG  
AAATGCCGGCGGAAAGCCCCGCAGGCAGGTGCGCCCCCGAACCCTGCGCCGGCCC  
ACGCCCCCGCCTGAGCCGTACCCGCTGGAATCGCTGGGCGAAGTCCTGCGGCCGGC  
GGCCGAAGCAATCAAGCGCGTCATCCAAGCGCCGGATGCCATCATCGGCGGTTTCGC  
TGCTGGCGGCGGCATCGCTGGCGGTGCAAGGACAGGCCGATGTTCAAATTGACGGC  
CGGATTCATCCGTTGTCTGTTGTGGCTGTTGAGCGTGGCCCAATCGGGCGAGCGCAAA  
TCAGCCGTGGATGCCGAAGCGATGCGGGCAGCGCGCGTGTTTGAAGCCGAGTTGAC  
GCAAGGCTATGAGTTGGAAAGCACCTTGACGAACAAGACATGGCGCAGTGGCAGG  
CAAGGGTGGATGCCGCCAAGTCCGACGCGAAGAAGAAAAAAGGGGAAGGGCTGAA  
AGCTGCCCTGCACGCCATCGGCCCGCCACCGCCTGCACCGCTGCTGCCACGCGTTAC  
CGTCGCAGACTTCACCGCCGAAGGCATCTTCAAGCTGATGCAGGTCAGCCGGCCGG  
CGCTGGGCGCGGTTACCGATGAAGCCGCGCTGGTGTGTTGGTGGTCATGGCATGTCGA  
AGGAAACCGTGATGCGCACGGCCGGGACGCTATGCAAGCTGTGGGACCGGGGCGA  
GCTTGACCGCGTACGTGCTGGCGACGGCGCGATGAAGCTGCAAGGCCGGCGCTTTG  
CACTGCACCTGCTGGCGCAGCCTGTCATTGCCGAGCGGGCGCTATCGGATGACGTGC  
TGGCCGGGCAGGGATTCTTGGCGCGGTGTCTGTTGGCCTGGCCTGAAGGCACTGCCG  
GATGGCGAACACTGAGTGATGAAAACATGCGCGACGACGTAGCGATGCAGCGGATG  
GTTGACGTGCTGCTATCCCGGTTTCGGCAAGAGCTGCCATTGGCTGAAGGGAAGCGG  
CAGGAACTGGAGCCGCGCGCGCTGCGGTTGAGCACTGAGGCGCGGGCCGTCTGGGC  
CGACGTGTACAGCGCCACAGAGCAAGGCATGCGTCAGGGCGGCCGGTTTCGCGCAAG

TGCAGGCGTGGGCGAGCAAGACGCCCCGAGCAAGCCGCACGCATCGCCGGTGTGCTG  
ACTTTGATTGATGACCCGGCGGCGCAAGTGATTAGTGCCGACGCGATGGACCGGGC  
CGCAGAGCTGGCGCTGTGGCACTTGAACGAAGCGGTGCGCCTGGCAGGCACGGCGG  
AGTTGTCGCCGGACGTGCGCGATGCCGAAGCCCTGCTGGGCTGGTGTTCATGAAAGC  
GGGCGGGAAGTCATCTATTCCCGACTGGTCATGAACAAAGGGCCGAACCGAACGCG  
CGAGCGTGAAGCGTTTCAGCGCGCGGTGCGCGAGCTTGAACACGCCGGCTGGGCGC  
TGCCGGTCAATGGTGGGATGACCTTGGATGGCGGGCACCGTCGCCACGTCTGGCGC  
ATCGTTCCTACAGTGAGGGGCAGTGATATGGGCCGACTACTGGATGCCCTACGCGC  
GGATTCTGAAAGCGTACCCGTTGCGACTCTCGCGACTCTTGCGACTTTTCCCGTTCC  
GACCCCGAAAAGTCGCAGAGTCGCAAAAGTCGCAGCGGGGCCAAGTCTGAAAACG  
CGCATGTTGTCCCGGTTCATCCGCACGCACCTGCTGGCCCTGGCGGCAGGTGAAGGTC  
ACCCCGCAAAGCTGGTGCATGGACTGAGCGATGCCGACATGCTGGCCTGCCACGGC  
TACACCGATGCCGAGCTGCGCGGTTACCTGGACGCCCTGGCGGCGCAGGGATTGAT  
GGACACCGGCACGACGCCCGTGGAATGGGGCGAGCCGGTCACGCGCACTTGCGAAG  
GCTGCGGCCCCGGTCCTGCTGTGGGCGGACTGCCCGGCCGTGGTGAAGGCATGCCCG  
TGGTGTTCGCGAGGAAGGCTGGCAAGCCCATTGCCCGGCCACCGCGCCGGCTTG  
GACGAATGGGCGCAGCAGGATGCCGAGAACACCAGCGGCCCGCCGTACTTCCTGCC  
GAAGGAGCAAGCGCCATGACTGACAACGGCTACCTGAGCCTGGACAAGGCCACCT  
GGCCAAGATGCAAAGGGAACGCCGGGCCAGCATTGCGCGAATCGACTACACGCCCA  
GCCGGGATGCATTGGCGGCCTTTGAAGCACGGCAGACACAGGAACGCCCCGGCAGC  
ATCGCGGCGACCAATAGCGCTGTGCTGGATGCCATCGTGACCGAGTGGGCCGAGCT  
GACCGGAATAAAGAAACAGGAAGTAGAAGCGCCCAAGACTCCGAAGGGCCCCGCCG  
GAATTCATGCACCAGTACGCGCGTACACGTATGAGTCCGGCCGCTGTGCGCTTTGGG  
CCCGGTCCAGTCGAAGACAGCGGCAACGCAAAAAGGCTGGCCGTTGGTGACCGTTC  
CGCGCGCGCGCAAGACTTCGACAGGCAAACCGGAATTAATGGACACATCGCAGGCG  
CGCGCGTGGGCGCGTATGAGTCCGGGCATACGGCAAGATCGCGGCACGGTCTAGCG  
AGCCGGCACGCCAGCGCTCCTGAGTCCCGACATGCAGCCCGCGCGCCCTGCGGCGC  
ACGGCGTCATCGTGACGGCCAGCCCTGTCAGGCCAAGAGCGAGCCGGGCAAGCGCC  
GCTGCCGATTCCATGGTGGACGTTCAACCGGCCCCACGTCCGAAGCCGGCAAGGCC  
CGGGCATTGGCGAACCTGCGGCAATACCAGAAAGCAGAGCGCCGAGAACTACCGCT  
GGTGTGCGACGCTTGCATGATTGAGCCTGTGCGCAGACAGATTCAGTAGTTGGCCT  
CTCTCCTTCCCAAGGAGGGTCTTTTAGCTACGGTGGCCGTTCCGCATTACGCGTGTT  
CGGCGTAGCCCTAGACTTGGCCTCCCGCGTCCATCTGCCACCTTTTCAGGCGTTGCC  
CAAGTCCAACCGCTGACGCATGATCAAGCCCCTAGACGAACAGTGGGTCCAAGAGT  
GATAAGGAAAACACTATTGGAATGGGGATCGTGATCACCGTTCTCACTTCATCCGC  
CGCAATTGCGGATGAGCCGCCCCACCCATTCGGCGGACGCATGTACAACACAGTGG  
AGAACGGATGGCTAACCTACGAATGCATGCCCCCGAAGCCGGAGTGCTGGCATGC  
GATTTTGTGCAAACCAGAATTCGTCAAAAATTGTCTGCTTCCGACGCCGCGAAGCGT  
TTGGCGAAGGAGACCCAAGGCTGGCCAGAAGCCCTTGCCAAAGAAATGAAAACCA  
ACCTGAAAGACTGTACGAGAGTGGTGATTGGAAGGGTTTGTGCGATATGGCCCAGC

AAGGACTTTCGGCGCTAAACGGCTCATCAAGTACCGAAGAGATGCGAAAGGCCGTG  
TCGCGCATGAGCCGGGTAGCACGCGGGGACTTGGCTGCCCAGATGGGCGCCATGGG  
CCAAGCCTGCAAAACGCGCACGCTGGACGGCATGAAGCGCTTCATGGCGCTGGGCA  
TTGATATCGAACAACGCACCTGCCAAATCGGTACTAACTCGTTTAAGCAGACATTCA  
AGGCAGTCTACGCTTCAGACGGAACCTTCAAGTCCTGGAACGTGGCCGACACCACA  
CCAAATGGCGATTGCGGAATTATCAACTTGTCCCGCTTTGTGCCGGTGCCCGAGAAG  
CCAGGCGAAAAGCCCTACTTTTGGCAGTACATCGCGCGCAAGGTCATCACCAACCCT  
GAGTCCACCACGTTACTGATGCAGTGTAAGGATCTCGACGAACGGGAGTACCTATA  
CGACTGGAAGAAGCAGAACATCTCTTTGCAGTGCGACTACATCGAAGACGGCTTTTG  
AGCGACATAACAGGCATCAAAGCCAGCTTGATCAGCGTCAAGCACGCAACGGTTGA  
CGGTAACCTTTGACGGTAACCTGATGGTGGAGAAAAGGCTACATCTGCGCAGTTGCTAC  
GTTTCGGGCTGCAATTCGATTGAATCACGGCCACCAATAAAATCAGTCACTTGAAGA  
GCGCCTAAGGCGCTTTTTTTGTGCCTCCGGGAAAATTACCGGGAAGATGAGTGGCCG  
TGGAGCATGTGTCGACTCCCCGCAATTCAATGCCAGCTAAAACTAGAGGTCTGCGGT  
TGATGTTGCTCACGGAACCTCGGCGGGTGTTAGCCCGCCAGGCTGTCTGTGCGGTATC  
TGTTGGTTGTAGTCGGCCAGCCACTGTTTCGGTCTGTTACGGACCTCGCTCAGCGTG  
CGGAAGATGTGCATGTCCAGCACGCCGCGCCGGTAGCTGCCGT

>CONTIG\_44\_length\_8664\_cov\_10.923275

CGCCATAGAGACCGAAATTTGCGGAGCGCAGCGCTAGCCGGCGGCGGATTGGCGGG  
GGCACCTTATGGATGGGCTGGCCCATCGTGACGCCAACGCTTTGGCTTCGTCCGAT  
CGAGCAATAGCACAGCCGCCTACCTGCAACTTCCACTCCATGGACAGGCAAAGAAT  
CCCTTTGTCCAAGGGCTGAACCAGATTATTGGCCTGTCCACGCCAACCCGGGAAGCG  
ATGGACATGCCACAAATTCTAAGAAGGGCGATGACTGCGGCGAGCGAGCATGCCAC  
TATGGGGGAGTCAGCGTTACCGCCAATGAAATCCATCCCCTTCTACAAGCCAGGGTT  
TCCTGGGCCATCCATTCGGTGCGGAACCTGCGCGAACATATGCCATGCCTATGTGATA  
GCGGCAGCGAGTACAAGCACTGCCATGGCGCGTGAGTGGAGGAGTACTTCCGTCGC  
TAACGTTGGTGCCCCCGGTTCGGAATCAAGCCGACATGTACGCGCCTATCTGGCGCGT  
GCTCTCACCGGGGTATAAGGCCGGCGCCCTGACCAACTTGAGAAACAGGGACGTGA  
TCGATCGATGCGATCACGCCGTTGTTGGTTGAGCGGTCTCAGGCACGTCATGTGGC  
AAGCATGCCGGGGATTGGCATCAAGCCGCTACCCCCGGACGCGACGATAGGAGTGA  
GCCCCGCGCGGGAACCTGGGACACTCAGTCGCCATGAGCTATGCCATGTGCAAGGCC  
GCGCGTCCACAAGGGCGTGTTATATTTTCGGATGGGCTGCGAACCAATCCTCACGTG  
CACACGTAAGCTCTTCTAATGGACTATTCTCAAATCACCTACAGGTGTAAGGCAATT  
TCGAGCGGCGGATATGTCCATACCTCAAGGTTCAAGTATGGACGAATCGGAAATGC  
CCGCCGGTCACTGAAAGACTTATTTTTCCGAGGTGTCGCGTTCAGACCTTTGGATCG  
TCATTCTGCGTGTTTCGGGGAGTACGGGGTGAGTCCACCAGGTCCTCGGGTTGTCTT  
AGCCGTACGTCCGGAGCATTGATTGACCAAGCTATTCCAGTGGCTATTTGTGCGCTTG  
TTGTGCGTCGGGTTGAATTGGATCGGCTCCTGTTTGGCTGGTGGCCGAGTGTGTGAT  
AAAGCCTAGAGATTCTATCGCTGAGTCCCATAGTCAGCGGCCCGTGCCGATAGCCCT

CAAACCAGCTAGGCTCAGGCGCCGGCAGGAAATACCCGATCACCGATGGAGTAACG  
GCGAGCGAGCACTCTGGTGTGGGGTAGTGACGTGTTAACCGCGCCGCTTCGCGGCG  
CACCTCAATAGGCAAACGCTCATCGAGCGCGAGCTCAACCAAGAAGGCGCCGGCTT  
GAAAGAGATGGCGCATACTTTCTTCGGGGGTCGTCATATGGGCATCCTAAGGGAGA  
AATTTGGATCAAAAGGCCCCGCGCTCGAGACGAGATCGCGGTAACCTCCTTACCCTTCA  
GCTTGTTTGGGGAGGGGGCAGCGTCCAGAATTTCTCCCCCATTTGGCGCGATCCTTGT  
CAGGAAAAGTTCCAGCAGTATTGGGCGGCGCCAATGGGCGTCTGGTACGAAGCTGT  
ACTCGTCATCAGCGAGGTCTCGCTGGGACTGCCTAGCCGCGAGCCAACGTCCTCGGC  
GTCTTAGATGGGTTTGTAGGGCAGCGTATGCTGCGTCTGCACCAAAATGTCCTTGGG  
ACAACACGACGGCAGCGTGGCGCACGCTCAACCACGCAAGGTAGCGACGTCTACCT  
ACAGAATATGGTGCCCACTCTGCTCGGATCGCCAACAAGAGCGTCTGGACGTCGCC  
GCTGTCCAGTCGATGGCGCTGTAAGAGATGAACAAGGTAGGCCTCGCTGTCCCCGTC  
GGCGAGCAACCGCCAGAGGGCATTGCGAATTATTCCATCGTCCTCGGCTAAGCGAA  
GTTGCAATGCGTCATCAAGAGCTGCTTGGATTTCTTTGCTCGGCAGATCGATGCCAC  
AGTAGCGCCAGGCAATAGGCTCGTAGATCGCCCGATGAGGCGCACCAGATGGAGAC  
GCACAGCGTATCAAGATGCCGGCCTGCTCTAGGAACTGGAGCAACTGTTCTGTTAAG  
CAGGGGCGAGGCGTGATTGGGTTTGGCTGTTGGGTGGAGAGGTGTAGGGCGCACCA  
AGCAGCAGTGCCCATCAATCCGACGCGCTCGGAAGCGCACAAACAGTGCGGTGCGGG  
GAGTTAAAAGAGTCGGTTGAGTCTGGACATGAGCCACGCATACCTCGGTGGGATCC  
AGCTCTTAGCGTATCAGATGAAGGAAATGGCGACTACATGATTTTCATGTAATCAGT  
GGGTGGCGCATAGATTGCTGGTCGCATTACAGCAATCGCGACCATGGCAACCAAAAC  
GATTTATGACGGGCAGTACCGCGAGCTGATCTACCAGCTGCGTGCACGCCGTGAGC  
GATTGGGGCTTTCACAGGGTGAAGTTGCTCGGCGGTTGAGCTGGCCACAACAACGC  
CTATCGGCGATCGAAGCAGGCGCACGTCGTCTGGATATCTTGGAGTTTGTTTTGCTT  
ACCCGTGCTTTGGGCATGACTGTGGCCGCTTCCACCAGGCTGCTGTTCCCAAAAGAA  
GGTTAGGTGGCAGATTGCCATATGGCGATTTTACCAATTCATCGCCTGACTGGAGGG  
CTGATTAGTTTTCTCGAGGGTGTGAGCTTAGATGAGGTATAGGTTGCCGCTGGCCT  
AAAGTGAGAGGCGGTTTGACATTGCGAGGTCACCGACTCAGGGCGATGCGCTGCTG  
CCGCTATGACTAGAACCCACGAAAAGATAGGCGTCACTCTCGGAATGTCGCTGAAT  
GCTGTAAATATCTCTGCGGTGTTTTCTGACGCCGCGATGAGTCCACGGCTGATGGTG  
CTGCCGGTCTTGTTATGACAATATTTCTCCGTCGTCAAGGCCACTTCACCCGCCATGG  
TCGGGGGACGGAGGTCAGAGCCTCCACTCAAGCGCCGACGACCAGAGGTCTCGCAT  
GCGAGACCTCTGTCTTTGCGCCCCGCTAATTGGTAGCAAATGCCCTCGTACTCCGAG  
TCGCGTGGAAGTTTGAAGTTCTCTCTATAGCTCGCTGATAGTTCTGTAGGCTCCTTGA  
TCTTATTGGCTAATAACAAACATGCCGGCTCCAGAGCACGCGATCATCGATGCTACA  
GCCCCGCTTTTGACCCAAAGCAGACATCTCTAGCGCCCTGTTCTCGGGTAAGCATCAT  
GTGCGCCATTCTACATAAACGTTAGGAGATTGGCGGCGTGGCGGAGATCGTGCTAT  
TTTTTCTCACGCGCCTGGCAGGCGCATGACACCCGTCTGAGCGAAGCTGGAAACGGC  
ACTGCCAGTAAACATTAACCTACGATGACCTTGTTCCGGTCCTCAGCTGGTGGTTACG  
GGTGACGCTGCGCTTACGGACCGTGGAGCAAAGTCATGCATAGCGTCGCCGTACCT

CCGTCCTCCGTGGACGGCATCAAGCGTCTCGCCAAAACACTCAAGCGCGAGCGCTC  
CATTCCCCACCATCAAGCTCTCGAAGAAGCTGCTCGCATCGCTGGCTTCGAGAACCT  
GAGCCATGCGCAACGTCAACTGGCACGTGGTGTTCATTCGACCCTCTACCCCGTTTT  
TCTCACTGCCTACTGGCGTGAGAACGGCCGTGGGGGACGCGAAACCCTGCGAATCG  
AGCTGGCAAAGCCCTTGGCCCAGGTCGTCCGCAGGAACCAGCTGAACGCCGTGCGT  
CAACTTGCCGGCTTCCGGCTCGACGCCGACGACCATATCGAGCGGGAACTCGACGT  
CGAGCGTCAGGACACAGCCCAGCACTATCTGCACGATGCCGCCAGTGCCTTGCGCTT  
CATGGTCGCTACTGGACTCGTTCCGGTGACCACCCAAGCTATGCATCGCAAGCTGCG  
CTACCTGCAGAAGATGCCGGGCCACGACCATCCGAGCGAGTGGCTTGACACGGCAA  
GCGGCTCGTGGCTCTACATGGACGAGCCCTACGATCACCACGGCCCCGAGCTGCTG  
GATCGTCGGCGGGCGCTGGCTGCGCGATTCAAACGTGTCCGTGGTTGCGCCGGCGTGG  
AAAGGACTCTACGTTCCCGGGCACTCGGTCCCGTATCTCGTCTCCGCCGATGCCGCG  
CTCCTGGCGCAGCTCTCCCGCAAAGTGGCTACCTTGTCGGGAGAGGGCGTCACCACAA  
CACTGGAGCGGCGAATCGGACCGTTACGGCACGGCCTTCCTCAGCCCCGGCGCGGGA  
GGCCGCGGGCCCTCAAGCCGCGGCGGCGTCCGATGCCTGCATGGCGGGGCGAGGTAC  
GTCGTGGTGCGACTCCCTACGGCAGGCCAGTTGGCGGTGCCGCCTCGCGGTGGCGCC  
CGGCGGTGCGGATGCCGATAGGAATGCACCTGAAGGTCGGGGCCATTGCTACATGGT  
CTGTGCAACTCGAGGCTACCCAAGCGCGTGACAGGACGCGCTCAGTGTGCTGCGGTC  
CGAACTGGACAACCTGGGTAATGGCCGAGTATCCCGGGCGATGCCATGAGCCAAGAGC  
AGTTTCAGGCCATGTACTACGGCGAATACATAGATCCTGTGCAAGGTGCCGCTGCGC  
AACTCTGGACCATCGGCGAGGTGCACGCCTTGCTCAGGCAAGGATATGCGGATTGC  
CCACCGCTGAACTCGCTGCTCAAGCACCTGGAGAAGGCGAGAATCGGACTCGAGAA  
GTCAGGCTGAGCTGACAGGCGACACCCACGTCCCATGGCTTCCCCCTGCCGTCACG  
AGGCGGGGGAAGCTCTGACCAGGCCGGTGGCCGCCGATTGCCGCAGGTCCAACGCA  
GAATCGTTTAATCGCGCCAGGCAAGCAATCTGAAAAGAAGAGACTCGCAGCATGAC  
GACATGCTCGACCAGGCATGTGCTCTCTCGACCCGACGCAGAGATCACCATCCGAC  
AGGACGCTCCGAGTGAAGTGCGGGACGCGTTAACCACCATTGCCTATCGATACGGA  
TTTAGGCCGAGCGCTCTGTGTGAAGTGTTGTGCGGAATCCGCTACCGCGCGCCCCGAC  
GAGGCAAACCTGGTCGGAGTTCCCGAACATCGACGAAGAGGTTCCGGGGCCTACTGGC  
GGAATGTGAGTGGTTTGAGGTCTACGACTTCGTGCAAGCGATCGCTTCCCGCCACCC  
AGGGGCATCGGTGTGCTTCGCCGATGAGGTCAACCGCTACTTCCGGGTGCGCAGGAGT  
CGGGTGCGCAACTCGTCGACGGCCGGCTCGAAATGCGTGGTGCCGAGGTGTTGAGG  
AGGACACCCTCGGGGACCTGATTCGGCGCAATCCGGATCTTTTTTCCCAAGCCGGTGC  
ACCAGATCGTCGACAAGGCCTGGGGCTATACGTCCAACCTTCGGTCGTCACCTGCACG  
ATGAGAAACCGCCGGAGTTCGAAGAGGCAGAGTTGATGGTGGGCATTAGCGGTGTG  
CTATGCCGCTATCTCGCCAGGCGAACGGCTGGCCGCCGCTAGGATGAAACAGAGAT  
GACGGGCACCGCCACGATCGAACTCTATGTGCGCAATGCCATAGAACACGCGTCCG  
AGCGGAACGTGTTGGCCGCACTCGTCGAACATCTGGCGAGTACCGATGGATGGTCG  
GCGATCTTCGCCAATATCCATGTTGGCGGGCCGCAAATTGATTTGTCGTGGTCGCCACG  
GACTCGTTGACGCTGATTGTGCAAGCGAAGCATTTCTCGCGCCGTGTCCGTGGCCAG

AAGAATGGGCAGTGGCAGATGCACGGTTCGGGCGGTGTGTGGCGGAGTGTCTGGAAA  
CCCATACTGCCAGGCATTGGAGGCAAAGAATGCGCTGAGGGACCAGCTCTGCGCGT  
CTCACGGAGAAATGCCTGGCTATCCGGATGCCTGTGTTGTCTTCGCCCCGCCGTTGC  
CGACGGGATCGGATGTGCCTGCGTCCGACTTCAAGGTCTCGATCATAAGTGCTGGCG  
CTTTTGCAGGAAGTCACCGGGAAGCGGTCCGGGCTCCTGCTTTCCAGGCAGCAGTGGG  
CCGCCTTTGCGCAAGAACTGGGCCTTCAGCGAGTGCAGACGCCGGGCGCCGCGTGC  
GACGCCAGACTGCTCGAACAGGAGGCGCTGCTGACGGCCTACTGGTCGCAGTTCTT  
ACTTATCTATGCGCCAGCCGTCGGGTCGCTGAAGAGTGACCGCTATGAGCTCGGAGC  
CGAAGAGCTCGATGCGATCGGCGTGGCAGACCGTGTTGCGCAGGATGATGACGACC  
TTCTCATTCTTGGGCCATCCGGCTGCGGGAAAACCCTCCTCGCCCCAAAAGATTGGCA  
TCCACTGCTTGGAGCGTGGCCACGTCCCAATATTCCTTCAAGGAAAGTACTTCACCG  
GAACACTGGGCGAGAGCATCGGGAGGGAGGCCGGCTTGCTCGGTGCGCCGTCGGCG  
GCTCGCCTGATCTCGGCGGCCAGGCGAACGGCCGACTGCTGGTGTGATCCTGGAC  
GGGTACAACGAATGTCCGGCAGCCGAGCAACTGGCGCTCACCAGGAGCCTGGCGGC  
GGCTGCCCCGGCGCTACGGTATGCGGCTAATCGTGAGCGCGCAGGTGACATTGTTTCG  
ATCGGATCTCATCGATGCCAGTCGTGTCGTCGTCAGCGAGCCTGACAAGGCGTTGAA  
GCTGGCGATTGCAGAATCGACGGCTGGTCAGGCAGGGTATCGATTGGCGTATCTTCT  
GGACTCGGTGTCGAGTGGGCTCGAGGCGGACCTGGTCGGCCGAGTCGGGGCAACAT  
TGGCTGACGGGGCAAGTCGTTTTGCTTGTTCGACGCCTATGCACGGCAAAAGCTCG  
GAGACGACGCATCCGACGGAATTCGACTCCTGGCGGCAGTTGCAGGGCAGCTGATC  
AATCGCATGTCTGTTACGCTGTCAATCAGGGACTTCGACCGTCTGGCGGCTGCCGAG  
CGTATCCATGGCGACTTACTCGGCAGGATAGTCGCCGCCGGCCTCGTGGTTCAGGCAA  
TCGGACAGGGTCAGCTTCCGCCATGAACTGATCTTCTCGGCGTTTCGCGGCCGAGTCC  
GTTGTTTCGCCAGAGCGACCATGATGTCGAGAAGGTGTTGCTGGCGCTGGTCGCCCCA  
AAGTATGGAAACAGTCGTGCATTGATCCTGGGCGCTTACGATGATGATCGTTTCGTG  
GCTAACGTGCTTGCAGGATCGAGGATGCCGGCCTGCTGCGGGCCGCATCGGATGG  
CGAGTGCAGGAGTGGTGGCGCGTAACTGGGTCGTGGCCCCGGTGCACACAGGTGCTCG  
AGAAGTTGACGGCGGAAGCCGCGGCTGTCCGGCATTCTGCTATGGGATGGCACCTGG  
GGCGGGGCCGGGGTGTGCGAAGACACTTTGTGCGATTGGAGTCCCTCAGAACGCGC  
GCTTATGACGACAATTTCAAACGGTGTTTGGCGCGGAACCTACCTGGACCGCGTCTT  
ACATGCCGTCGCTGAGATGGATCGATCATTGAACCAAGCATTCTGATGAGCTGAGGG  
AGGAAGCAAAGGAAAAGAAGGTCAGGCTCCGCACCGCATTGTTTGCCGATGCGTAC  
GTGATGTCGGGGCGAGCAGGGATATCGCAGCTGGTGAATCGCATCTGCCACGTTGA  
TTTTCCATCCAGGGCCGGCAAGAGTGAAGTTGCGGACAGCATTAAAGGTGCGTGGG  
AACGGCCTCGCACGTCTGGCCAGACGTATCTTCTGCTGACCCTAGTCAGATTTCGCGG  
AGGACAGAGCCTACATCATCCCGCATATCCTGCCGTTGCTTGGCGAGCAGTGGAGGT  
ATCAGCCCTATCATCTGCAGCTTGCACTGCTGAACTCTGTGTATTTCTTTCGTCTGAG  
TGATGACGGGTTGAAACAGCAGCTTGTGACGCTCTGGAAGCTTTGCTTCCGACCTT  
GGGGCCGATGGTGTCCGGGATGGTGGTCGAAGCGCTCGAACACATGGGTGCCCTGG  
AGGAGGAGGTCGACCAACATGTCTGGCGCGGTTCAGGGAAGATCTGCAGAATCTTCTG

TCAGGCCCTATGGACGCGGTGCAGGATGCGAAGGCCTGGGCAGCGTACTCCTGCCA  
GTTTGATCACCCGTTCTCGTCGGCGTACTGCGAGGTCATACAGGAGTTGAACCAGCA  
CCAGCGCAAGCGCCTGTTGACTATGGCCTGCCGGGGCGCCGGGTATGCGGGGTTGTT  
CGTCTCTCCTTTGATTCAGGAGCTGACCAAGTACCAGGATCCTAAGGTTGCGCCCCG  
TCTCGAGAGATGGACAGCCCTCCCGGAACTCAACAGCTTCATGCCGCAAGAATCGA  
TCTCGGCGTTTGTGTGGGCCCATGTCGCGCTTGGAATGCTCGGAGCTCCGCCGCCAG  
CCGACCGAGGGGATGTGGAGTCCCCGGGCAAGGATGCCTTGATCGCTTTCGGCGAT  
CTGCACTACTGGGCTCATCGCTTGATCTTGACGCCGATCGTCTCACCCAATCCTGCT  
CAGCGGCCATGGAAGTCTTGCTGCACCCGGCGCAGCTTGAGCGGCCTCGACGCTG  
TACCTGGTGACTAAGTCAATGTCATACGAGAACGCAGCCAGCGAATCGGTAATACA  
GAAGTTTCCCGGCAAGATGTTACCTGATTAGCCCTGACCATCAGCCGCCTGTGCGAG  
GATCTGCGCCGCGCTGGGTGGATGCTGCTGTACCTGAAGCCAACGAGGTGGCGTG  
ATGAGTATCAATGC

>CONTIG\_45\_length\_8658\_cov\_105.219552

TGCTCAAACGCGAGCGGATCAGGCGGCGGACCTATCCCACCAAGGACGCCGCTCGC  
GCCGAGGTATTCGACTACATCGAGATGTTCTACAACCCCAACCGTCGCCACGGTTCA  
ACTGGCGACCTGTACCTGTAGAGTTTGAACGGCGCTATGCGCAACGAGGGTCTTGA  
GTGTCTACGGAACCCTGGGCGTATCAAGTCCAACGCAAGGGCTTGCGAAAGATGGC  
CCAAGAGCTCGAACTCGACGCTCACAGAGCGATACAACACTGCCACAGCGTTTGAG  
TCGTAGGGATTTTGGTTCGTTTGAACAAGAACGACTCGAATGAAGGTCAGGTTTCGT  
TGGCCCGCCGGTTCTGCGCGATCGCTCCGAGCGCACACGATACGCCCTGCCTCCT  
GTCGCTTGTAATTCAAACATCCCACAGAGGGCCACTTAGGCACGCCTTGCTGCTGC  
ATCATCGATCCATCGCCGGGAGCCAACAGCATCGCTGCCCTGCCTCCGCTTGCCAAG  
CAACTATCATTGACAAGTGACCAATGGAGGCCCGCTCCGCGCTAATGTATAGGACTA  
GAGACAAGGGACGGCTCGTTGCAATGGAAACCGGAATTTGCAAGAACTGCATCGCG  
GATGATTGTCTCAAAGCAGAGATTGATGCTCGTGCAGAGCTCGTCAATTGCACGGAA  
TGCAGCCGAGCTCGGAAGGGCATATCCATTGAAGCTCTTGCGGCGGCGGCTTGAGAC  
GGTTCTTCGGAAGTACTACGTAGCGGGCGAAGCTTACAAGCATTACGACGGTGTCG  
ATGACGACAGGGGAACATGGCAGCAGCACGGCGAGCTCCTATCTGACATCATTAG  
GATGCACTTGAGAGATTTTACGGTTGCCACTCATTAAATTGTTCAAGCGGTGATGGGT  
GCAGAGGACTGCGATCCAGCGTCCGAGAGCTATGGGTTCTGGAGTGAGGATTCTCA  
CTACCAATTTAAGTTTCGTACAGTACGAGCCGACCTGGTTCCCAGGGTGGCATGAGAC  
CAAAGCCGAATTGAAGCATGGTCGTCGGTTTTTTCAGCCCCGCTGCCATGTCCATGTT  
TGATGCTCTCTTCCATGGGATCGATAACGTCACAGCCGCTATCAAGGGGAAACAGCG  
GAAGGTTTGCTATTCACTATCCGTCGGCAAGTACCTGTTCCGTGCCAGGGTAGTCGA  
TTCTCTGTCAGCGCAGGCAGAGGTCATCGCGGCACCTGCGCGCCAAGTCGGGCCGC  
CTCCATCGGAGATCGCGCGAAGCGGCCGCATGAATGCAGAGGGCGTATCTGTCTTA  
TACGCCTCCACTGAGGCAAGCACTTGCGTAGCCGAGATGCGGGCCGGCTATCGGCAG  
CACGTTGGCAGTGGTGGAGTTACAGACCACGCGTAGACTACGTGTCCTCGACCTTCG

CAGGCTTGAAAGGGCTTGGCACGAACCAAGCATGTTTCGATCCTAACTATTTCGGATAA  
GCGCATCCGTCTCGCCGCGCTTCGCCAACTGCATGAACTGGTCTCTCAACCGATTCT  
GCCAGGGAAGGAGGCAGACTACATCGTGACTCAGACAATGGCTGAGTACCTTGCCC  
ACGTGTTCCACAGGCCCTTCGATGGGATCGTATTTTCGATCGGCTCAGGATGTGCTTG  
GTACCAACCTTGTGCTCTTCTCACGGAGCAGGCCGTTTGATGGAAAGCTCTCGCCCA  
GATTCGGCGTCAAGTACGTCAAGGACAGCCTAAAGTTCGTCCTAATAAGGTCTGTGA  
GAATCGACTACGAGGAACTGTCCCTCGTAAGCGTCCAAGGCCAACCTTACCTTCTGG  
ACGTTCGATGGGCAGGCTAAGTTTGATGAGTGGCTTTCGGACTAGGGCAGTGCAGGA  
CACGGGGCCGCGCGGAAACGCATCATGAGGGTTCGGCAGGAATTAGTGAGAAATTAT  
TTTCTAACAGCGAGCCAGCTCACTTTTCGGCTGTTTTTTTACACGAATCCTTGCCGACC  
CTCTGGTTGCGCTGGCTTTTGCTAGTTCACAACCGTCCAGCCAAAATGACGCCGCCG  
TCCAGTTTGACTGATAGCTTCGTCCAGTTTATTTGGTGCCAGCGTCCACTTACTTGGC  
TTTATGTACCCATGCTCCTCAACGCTCTAAGCAGACCGAATGTGAAACACCTAGGA  
TGCCCAATCAGGTCCGTGTTGTAACCTTGAAATTTTCGTCATGACGAAAAAATAGCC  
ACCGGCATAGCCATTTTGAGCCGGAGCGTTACCAGCAGCTGGCATGGCTAATCACA  
GGTGCGCCAGCTCAGCGCTGAATCTGTCTTGCACCTTGGAGGACAAATCTAAGTTCA  
ACGCATTAGGCTGCCAGTCAAAGAAAAGCCCCGACTAGCGGGGCCATTCTATTATTC  
GCCTTGAACCTGACCACCTCTAGCTCGACCCCAGTTCTTTCCACGTTGCTTAGTACA  
TGTTGTCGATATGAGGGATTCCATACCGTATTGCCAGCGATAAGGTGATTAGTTCGC  
CCAGCCGTCACCATCATGCCTGATTCAAGATCGCGGCGAGTGGAACCGGGGTTGAC  
TGACCGCACCAACGGCGGACCCTACTCCCGATGCACCAGCAGCCAAGCCGCCCAAGG  
TGATCGCTGCAGACGTCATGCCCCCTGCAAGTGCAGCCCCCTTTTTGATAAGCGACAT  
ACATAAGCCACAGCATGACCACGGTGATGATGACTAGGCGCACGCAGTCAAAAAAT  
GGGCTCGCCTCGGCGCTGTCTATGTTTGTTGCGCCGACCACGGCAACGAAGATCTTC  
ATGGCAAATGCCAGAACTGCGCTTACAAGCGCGATCTGCAATATGGCGGCAATCAC  
CTCACCAAACCAACCGATCAAAAAATGCTCTAGTAGCAGGCCACATAAGCAACATGA  
TAAAAAATGGACCAATGCCAAAAAGCAATTCGAGCAGCGTTCTAGATGCGACGATC  
ATTGCACCAGCAGGAGCGGCAATAATGAGAGTTGCAGTTGCAATAATAATTGCTTC  
AAAAAACTCTCCAATCATCATCCCGATTTCGGTCATACCTCTATCAGAGGCGCGGTT  
CCAAAGCTCGCCTGCTAAGGCCAGCCCCTTTCCGACCGACTGGTCAACAACTTGATA  
AACAGTGGCCGGACTCGCACCGTTGTGCGCTGAGAACGCCTGTGTTATTCCAACCTC  
CAAGCCGTGACCGGTAGCAACTATAAAGTTTCATGTAGGTGCCTGCGCTCAATGCAA  
ACGCGCCGATCAACGCAAATTTTCCGAAAGATATTATGAGCTGGGAAAACAGCCCA  
TCAACTCGGCCCAGGGTCATCAAAATTCCAATGATGGAATAGTAAAGAGATCCCAT  
AAGAACCGCAGTTCCCGCGATCTTTTCAATTACCACAGGAACCGTTGACTCGACATA  
AGCGCCCATCGCGTTTGTAACGGAGTCGCCTATGAACTGAAAAATCATCGGGTCTGA  
CATGTTTATTTTTCTTTTTTACAGAGGGCAGCGGAGAGTAACCGCGACGCGAATTA  
GCTATTTTCGTTCTCTGCCTGTTGCGCGTTAATACAGTTCGGCACCAAGGCTCTTTTCGC  
CGGGGTTATTCTTGCAAGGCCGCCAGCATCGCATTTTCGTTGGTCTCTGTTCGGAATTGTA  
CTCCGCGACAGTCCGAATTGGCTCGTTGTTGTTACAGCCAGCAAAAAGGAAAACGA

GCGAAGTCACATAGACAAACTTTTTCATAGTTACATCCTCTTGGTAGAGCGCGGAAT  
TTGCGTGAGCGCAGCGGACACTTCCGAAGCAACGATTATTTGCCGTGTTGCAAGCCA  
CCTCAGTGCCGCCTCCGGCATCCCAGCGCGTGTTGCATCTAGAAAACGCTGCCTGCC  
ATTCACGAATGCAAGCGCGATGCAGGTCGCTGTCAAAGCGAACGCTACAATCTGCG  
CTTCACAACTCGCAAGGCTCTTGATTCCGGGAATAGAACTCCAAGCGTGTCGTGTG  
CAATCCAGTAGAGAGCGACCAGTGCAAAGAACATTGCTACGATATCGAGGCAAAAC  
ATGTGTGCGTCGCCACGCAATGCTTTATTGAAACGAGAAGACCCAAATTTCCGAAC  
GAAAGCCAGAACCTGATAGGTAAATTCACGTATCCGATGAGTAGGATTAATTCGAT  
GAAATGCAGCATAAGTCCTCCTAGAACTCGACCGGATTCAAAGGAGAATAGCCACG  
ACGCGAGTTTAATTTTCGCATTGATTTTCGCGTTGTCGTTGCTGCTGAATTTTTCTCA  
GCTACCGCCATCATCTGAAACAACCTGGAGTTTGGTTTGCTCGTTGGCGATCATCGCT  
TGTTTCGCTAGCGATGCGTCCTTGTAGCTCAGCGATCGCCTTTGGATCCTGTGTCTTGT  
TGATTTTCGCCCATGAGCGAGCTGATCTGATCGAGACGTGATTTTGCAGCTTCATATG  
CATCGCCAACGAATGCCTTGTCTGCGCTGGTTTCGCAGCTGCAGCCTGGCAGGCAG  
TTCGCTGCACATCGCCACAAGACGTGCGCATGTGTCTGAAGATCTTGTTAGCTTCGT  
AGATGGCTGCTGCCGAGCTGCTAAGGCCGCTGTACCCGCCATTGCGCACAGAGTCAT  
AGACGCTTTGCCAATCCTGGGGCAAGTAGTCGCGCAATTCCGGATCGTTCATGATCT  
GACCCAAACCGCGCGGGCCAGTGA CTGCGTCGTATTGCTTCTGCATTTGGTTAATCT  
GGCTGACCATCTGGTCATACTGTGCCTTCCACTTCGCTATCGTCTCGATCTGATTGAT  
CGTAGAAGGAACGTCGGCCACAACGGTGACCGGGACACCGGCGTAGGCATAACCGC  
CGAGCATCAGCGAGCCTACGAGAAGAAATGATTTGTTGATGTGCATCAGTGCCACTC  
CTGTTGCGTTAGGAGGGACGAGGGCCGACTGTTCCGGCTGGGTCAGGAGGGGCTTAG  
CCTCCGCAGCTTCACCTTTGGCGGTTAGCTCACTATGCGGCCATTCTGTTTCATGGCTG  
TCAGGGCCTTCTTTTCAGCCCGGCACCCGGTACGCACGAAGCGTTCTTGGGGCAACT  
CGACCCAGGGTCTTGAAACGTATCGTCTTTACCAGTTGCTTCGGACGATGATTAGA  
TTTTCGCTCAAATACGGTACATCTGCCAGGTCTTCCAAAGCCTGATCGACGGTGCGG  
AACCATAGCTGCATGCCATCCCTATCGACAACCTACTCGGGATTCCGGTGCCGTGCTCG  
ATACGCATTGCGTATCCTCTCTTTTCGTTTCGGCATGTAAGATCACCTGAATTTCCCTC  
CTCTTTCCAGACTGTCACAGTAGTCTTCGAGGTTATGAAACGATAAAGATTTATCAG  
GCGTCGTGGTGCTCATTAGCTTTTACGTTTTTACCCTAAGCATTGCACCTATCTGATC  
CATATACGGCTTGCTAGCCCCTGGTGATGATCGCTGAAGGCTACGAACTGGCTCAAT  
CGCTTTCTTCTCGCTCGCACTCCTTCTTGCTTCCGATACGGCTACTCCAGCCACTGGC  
TCAAATTCACCTCTCTCGTAGCGCGAAACCATGGCTCTTAGCCAACGTTCTGGGGTG  
GTCTTGATGCTGTTGGTCGAAAGCACTCCGGCAAGTTCGTCCAGGAGAAGCTGTGCT  
TCGTAAACGTCGATTCCAGCCATCAGCAGTTCCACTGCACGCCTTTGTGGCACGTTTA  
ACGAGCGCGGCCAGAAAAGTTCTCTTCCAACCGGGACGCCTGCATCTGCGTCGCCAT  
CGTTTTTACCGTGATGACTTTACACGCAGTAGGTTGTAGTGGTTTTTCATCAATAGT  
CTTAATTAAGTTGGTACTGCTCTTCTTGGTACTACTTACACTTGGTTTACCCCCCTGT  
GCACCAAGGCCTGACAGGCCATTGGATGAGTCACCATGCCCCGGACGGCCATACCC  
CGGTTTTTGGGGGTATGGTTCAGGGTCTGATGTGGTCGTAGCAATGTGCGGCTCAGG

CGTATCTGTCACAACCTTGTAACCACTTTATTTTTCTCTTGAGAATCACGCTCCCGCTTT  
TGCTGGAAGTAACCAGCAGCTTGCATTTCTCTCCGAGCGCGAAGCCACTGCTGCTCG  
CTCAACTTGAAGGTCTTACGTACATGCCAAATATTTAACTTAAAATCAGAACTTCTC  
CCAAGCATCCAGGATAGGACGACACGTGCGAGTCCATCCCAATCGGTGGTCCGGTCAA  
GATGTCATCAGGCACTGCCGAGAACGCGACGACGCTTGATGCTGATAAATTCGCTCAT  
AACTAGACTAGCCTGCAACGCTGTCGGCAGGCGCTGCTTCTCCGTCAAGTGACAATG  
CATCCTTGACTTGAAGCGTTCGGAAGTAGACACGCCTCCCTACACGCAACATTGTGG  
GCCTGAGTTTTTCGAGAAACCTCATTATTCGAGTACAGCGCTACACGCATTCCGTCGG  
GAGAACGTCCTAAAAGAGCGGCAACGTCAACCAGCTTCATAAGCGGCCCATACTTC  
TGCAGCAGATATTCTTCAGTTGTCATAGGAGTGCATGTACCTACGGTTAATTTCTGTA  
GATGCTCATCCTCATGACTTCAAATCCTTTGGTCAACATGCACTGAAATTTCTAAAAT  
ACCAAGATGCTATATATTGGTTTTTTTTTGCAGACACTACCTGATCCGCTGACAACCTA  
ATTTCCGGCTAAAAATAAGCCTGATAACAATGGAAAACAGAAATACAACAAATTTTA  
ATTCTGTCTGCGCACACCCCTTAATGAAAGCCAAATTGACATAATTTGGTCGTGCTCC  
CATAGAGTGTATTTGGGAGAACACAGCGCGTTTTGAGCAAAGTTATCAAACGGCAG  
GCGATACCTCCCTATCCACTTATCAGTTAGGCAACCCCTCTTCCGAGTCGGTCCAAC  
TTTGATACAAGGTCCTCAGCCCGCAGGTGTGTGTATCGCCGCAACATTTGCATGGAT  
TTGTGACCACTGATCGCAGCAACTTCCTGGTCTGAAAGGCCTGCTTCAACAAGTCGA  
CTGATTGCTTCATGCCGTAGATCATGAAAATGTAGGTCCGCCATTCCGGAGTCGCGC  
TTGAGCTTCATCCAAGCTGGATTGAACTGGTAAGAGCGACGTTTGCCATCTCTCCCA  
GGCTCGCCATAGAACAGCAAATCGGTGTCGATAGGACGTACAGGGTTGGCCAACGC  
AACTCGCAACACTTGAACAGCCTCCTGGGTCAACGGGACAGTCCGTGAGCTGCCGTT  
CTTTGTCTGCTGCAGACGGGCCACGCGGCGCACCAAGTCAACTTGGCTGCGGCGCA  
GGCCCACAAGTTCGGAAGCGCGCATTTCCCGTTTCCAAGGCTAAGCGTACGATCCAA  
CCGAGCATCGGATTTGAGTGGCCATCTACTGCGCGAAGCAGGCGCTGCTCCTCGTG  
GGAATCAAGCGGCGATCTCGCCCAGGGCCAGGTGGCGGGCGCCGAATGCCTAGCAC  
CGGGCTGTGGATGAGCCCTAGGCCCCATTCCTTCAATGCCACCGTAAACATGTGCC  
AAGCAACGCGAGTTCCAAGCGCACTGTGTTGTTACTGCGCGGCCGGCGTTGACCCTG  
CGCATCCAGGTCTCCGGCCAAGCGCTCGTCGCGGAAGCGAGCAACGATCTCTGCGG  
TCAGCGCCGCCAATGAATAACGGCCAAGATGTTTGATCAGAACTTCGGCACGGCGC  
ACTTCACTGATCTGCGTGACAGGCCGCTTGCCTGGCGTGACTTCAGCCAGGTATCGC  
CGCATCGCAGCTTCAACGGTAGTGCGCTCGGAGCCGGCGCGGCGGATGTACACACC  
GCGCACCATCTCATCCTCGGTGCGCCTAGCCCAGTCCTCGGCATCACGCTTGGTGCG  
GAATGTCTTGATCGCAGGAGGCCATCCAGTCTTACGGATGACGGCCTTCCAAGCACC  
TGAGGGGGTTTTTACGAGTGTTGCCATAGGTCTCTACTTCCCGGACTGTACCGAAAA  
TGTACCTTTGGCCTCTCTCTTAAGATGAGACGCGTCAGCAAATCATTGATTTTACTGG  
TGGGCCCCACCAGGATTGAAACCTGGAACCAAAGGATTATGAGTCCTCTGCTCTAACC  
GTTGAGCTATAGGCCCGGCAGGGTGGGTGGCGAGATGCAGGGCATGTCGGACCGTC  
CAGCTGACGCGAAAGTTTACCTGTCCGTGCGCGTCGCTGTCTGCTGTATCAGGTGTC  
AATGAGGACGAGTGGCCGCACCTACCTGTGTTTGCGCATGCAGATACAGGAAAGCC

CGGCGTGAGCCAGGCTTTAAAGGTGTACGCGATCAATCTGTCCTGCCGCACTATTTCG  
AGGATGAATGATCTAGCGACATACACCTCAGCAATTCCGAATCGCTAATCCCCAATC  
CTCAACCCGGCCACTACGCCATCTCAAACCTGCGCATCGATCAACTTCCGCCCCGCTT  
GAAACCCATGCGCAATAGCGTCCTGATACGTCTCCCAACCAGGCCCCCTGGTCGTCTGA  
TGCGTGCGTGGCGTTGGCCGCCAAGCGCATACACACGACCTGCACCGTCCAGTTGGC  
ATCGGGCGCAGCGCGCTCGACGCGTACGCGGATTTTCGTGATCGCGGTACGTGGTGGT  
TTCAAAGCGGCTTTGCCTGCTCATAAGGCGGTCTCGTGTGCGTGCGTCCGTCAACTT  
AGAAGGCACGGTTAGAACAC

>CONTIG\_46\_length\_8614\_cov\_20.755862

GCATGGCGAAGCTGCAAAACACGCGCGACATGTTTCGCCCAGCGCTATCCCCAAGTG  
ACCAATGACGCGACCTTTCAGCAGCTTTCGCGATGGTCGATCAGTGGCAATCGCAG  
GGCCGCGAGAACGTTCGAGGACGCCCTCTACAGCGGCGCCGCGCTCCTGGACACCCT  
GGACAGCACCAACCAGCAGTTCGAGACGATGGGTCAGGCCTCGCAGTCGGCGACAG  
GTGCACTCGCGGCAACGCGAGGCCGGCAACCAGATCAACATGCTGGTCGGTCAGGAA  
ATGATGAAGCTCAACGCACAAACCGCCGCCATGAACCAAGCCGTGCTTGAGGAACA  
GGCTCGGCAGATGGCAGGCGATCGCCTGACGCAACGGAACATGGAGAACGCCTACG  
GCAGCGACAAAGCTTTCCAAAAATCTAACCAGCCGGCCGCAAAGCCCGTTGGAGAG  
TGGTGGTGAAGGCCCGCATCCTCGCCTGCATCGTGCTTGCTGCTGTCAGCCTCGCAG  
GCTGCACAGCGCAACCGGATGTCGATAAGGCAAAGCATGCGGAACAGGCAGTCGCA  
GCGGGAAAACCCTGCGAGGAATCGTTCACCTGTGAAGCCCCGGCCGTACTCCCCAA  
GTCTGTGCCAGCCAAATGCGGATGCGCGTTGCTATTTGATGCTGAGTGCAGTGC GTT  
GATCGACAGCACTTACGGCAAGAGTGCTGCCGACAACCTTGAAAACGCGCCTGAATA  
TGGCGCGCGCTAAGGGCGATGCGGGCGCAACGTGCATGCCCTGCACCAGGCCAACAA  
GCATCTGCCCCCAAGCCGAAACGGACCGATGCTTTCGCACCATCCACTGTGGAGCCG  
GCAAAGCCGGTTTTCACAGTGGTGGCCGGATGCGCAAGCGAAGCAAGCCCCTGCGAC  
TAAGCAATAGGACGGATAGCGATGGACCCGACCACGACAGGCTTCCTGACACAGCT  
ATTGCAGAACTTCCAGAACGTGTTCTCCAATGGGTTTGGGATCATCACACCCCGCGC  
TCAGGCAATAATTGGCACGCTCGCTGCAATCGAGATTGCAGTCGCTGCGCTGTTTTG  
GGCACTGCGCGGGGAAGATTTACCGCGCCGTTCTTGCGAAAGCTCCTACGCATCG  
GATTCTTCGCGTTCCTTGTGGCGTCGTGGCCGACGTTAACCAGAGGCACGGCCGAAG  
GGCTTGCCCAATCGGCTCCCTTGCTGGCGGTGGCTCAGGCACGCCATTGATCAATG  
ACCCAAGTCGAATACTTGACCAGGCAATGGTCGTCATCAAACCCATTGAGGATGAA  
ATTGCGCGTATCCAAGAAGGGCCGTGGTATCAAAAAATTGCCGTCTTGGCAGTGGTT  
ATCCAATACACAGTTGCGGAGCTAAGCGTGTTGGTCGCGTTTTTCATCCTTGCGATC  
ACCTGCTTACTCACACAAATTGAGTTCGCCCTGGTCGCTGTACTTGGCTTAATCCTAG  
TGCCGTGGGGGGTTAGCAATCACACCGCATTCTTGCAGAGAAGGCCATCGGCGCG  
GTGATTGCGCAGGGGGTCAAACCTGATGGTTTTAAGTTTCATCATTGCTGTCTATGGA  
GGGGTACTCAACACGTTTGCGCTAAGCCCAGCGCCACCACTGATGGACACCTGGCT  
GCTGGCTGGATCTGCCTTTGTCATGGCAATCATCGCGGTGCACGCACCAGCTGTGGC

GGGCGGCTTGCTCTCTGGCTCACCATCGTTGACCGCCGGTAGCGCGGCTGGCGTAGC  
CATCGGTGCCGGCGCTGCTGCGATCGGTGCCGGCGTGGGCGCCGCCGCGCTGGGCC  
GGATGGGCGCAGCCAGTGCGTCCAAGACCATCACCGCCGCCGGACAGATCCACGGC  
GCCGGCAGTGCCGCCGCCGCGAACAGCACGGGTGCAGCTGCGGGCCGCACTAAGCAC  
CCCCGCTGTTCTGTTGGCGGCGTGCTTGCTGGGGTGATGGCCGCAAGCACTACGCCTGC  
CGGCCAAGCCGCAGCCGCCGGACTGCAACGTGCCGCAAGTACGCGGCTCGGCCAAG  
CGGCCATCAAGTTCGGGTGAGCTGCCGCTGCCAACATTGACCGCGGCCTCTCAGCGG  
GTGCCAGCTACGCCGCCGCTGGTGTGGGCGAGGTGCGGCCGCATGGCCGCTGCACCG  
GTCACCAACGCAGGCGCAGCGGTGAAAGATGCCTGGTCCCAGGGCGTTGCGCAGAG  
CGGTGGTGTTCGCGCCGGCAGCAGCATCGCCGCCTGCAGCGACGCCACGCCGTCCCC  
GGAACGGCTAGAAGCCGGCAAACAGCGATTACAGCGACGCAGCAACGGTTCGCCAAG  
GCAACAACGACAGCGGTCAAAGGGGCCACGTCCACCAGCGGTGGCGGCAGTGGTA  
ACCCGACGATTGCCCCCACCACGACGAGAGCTAACACGCATGAGCAGCACCAAAG  
ACCTACTGCAAACGCCCGTCGGCCAGCGTCCCAGCTCGCCGCCGATGTCACCACACC  
ACGATTCGGCTCGCAAAGGCTGGACCGACAAGTTAGAGAAATCGGAGAGCGACAAA  
CGCGCATGGCGCTGGGCAGCGGTGGGCGGCTACGCGTTGTCGGTGCTGCTGGCTGG  
CGGCCTCATTGCCGTAACCAATCGGCCACCGCCGAAGCCACTCATTGCGCGCATCAA  
CACCGATGGCGCCCCCAGGTCTGTTGGGCTATGCGAGTCCCAACTACACGCCCGGCC  
AGGCCGAGATTGCTACTTCTCAAACATTGGGTGGAGCTGGTGCGCACCGTGCCCG  
TTGATCCAGTGGTGGTGAAGTCGGCATGGAGCGAGGCCTACAGCTTCATGACCCCG  
GCCTCAGCAAACAAGCTCAATGCCGAAGCCCGCGTGCCGGGTTCGACCATGAGCAA  
GGTCGGCCAAGAACTGTCACCACCCAAGTGACCTCCGTGGTGCCTGTGTGGGCCG  
ACAGCTACCAGGTGCGGTGGGTGCGAAACCAGCTTCACCGATCAGGGCCAGGTGAAA  
GAGCGGGCAACGTGGACATCCACGTTACCGTCAAGCAAAGCACACCAGATCCCAA  
GATCGAGCTGGTGAACCCGCTCGGCTTGTTTCATCACGGACTTCAATTGGCAGCGCGA  
CATCGGTAGCACCCCCTAAATTTTTTCGCCTAAGAGTGCAAACACTATGCAAACCATA  
AAGACCTCTCTTCTGCCCTTGCTGCTGTTGTCCGCCGGTATTGCCAATGCGCAGACC  
ACGCCACAAGTGCCGGCGATCACCAGCGCGCTCAACGACAACAGCACCGCCGCTGC  
GAATGCAACGCCGTTGGCGAACAACGCCCTGCACCCGCGCCGGCATAATGCCGC  
CGCCTGTGACGCCGGAGCGCGTCTCCCCGCGTGTTGCCAAAGCGCGGTCCGACTTCG  
ACAGCAAGCAGCGCGCTCAGGTGCGCCGAATACGTGCGCCAGGCGCGACAAGCCCCG  
TCCAGCAGCAGCACCGCCAACATTGGCGGGCAGACGATCTTCACCTATCGCCCTGGT  
GCGCTCTACACGATCTATGTGCGTGCCGGGCCGTCAAACCGTCATCGACTTCCAGTCC  
GGCGAGCAGCTGACAGGCGAGGTCAACGGGTCCGATACGGTGCGGTGGATGATTAG  
CCAGGTCACCAGCGGCACCGATGCCGGCGAGCAAGTGACCTGGTACTCAAGGCGA  
CGGAGGCGGGTGTAACCAACGACCTGTTTCATTGCCACCAATCGCCGCACCTACCTGA  
TCACCGCGCGCAGCGTGCCGATTGGAGCATGCCGAGTGTGTCTGTGGCAGTACCCG  
ATGGACACCTGGAAAGCACAGCAAGCCGTCGCGGCCAAGCGCGAAGCGGTGAGC  
CGGTGGCCGTGGCCCCGGATGCGCTTCACTTCAATTACGACATCAAGGGCGGGCGCT  
ATTCTGGAAGCCCATGCAGGTCTTTGACGACGGTGCGCAGACTTATATCCGCATGC

CGGCCACGCTCAATGCGACCGACGCCCCGGCGCTGTTTCCTGATCGAGAAGGGTGAG  
CCGCTGCTGGTCAACTACCGCGTCAAGGGCGTGGCAAATGGCACCACCGGGCCGAC  
CTACATCGTGGATCGGGTGTGTTGATCGCGCCGAGCTCCGCGTAGGTGCCAAGCAAAC  
CATCACGATCCGCCGTGCTAATCACAGAGGTGCCGCATGCAGACCACGAACGGAA  
CCCCGGCTGACGACGAACGCGATCCGGTCACTGGCGAATCGGCCAGCGAAGGCTAT  
CAGCCGCCGACGACGCACCCATCCCGCTGGCAACGCCAAAGCCGAAGATCAAGAC  
CCTGGACAAAAAGAAGGTCGGCATCATCGCCGGCATTGCGGGTGTGTTGATCGCATT  
CGCTTTCGTCCAGGCCTTCATGCAGAAACCAAACCAGAACAAGCCCAAGGAGCAGC  
AGCCGACCGCAAACATGTCCACCAAGCCCGAGGCGTTCAACGCGTTGCCCGGCGAC  
TACGCCACGGCCGCCAGCAGCGCGCAGACCGCGCGCCGAAGCTGGGGCCACCGAT  
GCCGGGGGAAGTGGGTCAAATGCAGTACGAAGCCCAACAGCAGGCAAGCACGCGG  
GCTTACGGCGGCGGTGCACAGCCGCAAACAGCGGCCAGCAGTTTGCCGCCCAACA  
GGATCTACAGCGCATGCAGCAGGCCGCCAATGCCCCGCTACGCGAAAACCAGCTTCC  
AGCAAAGCGGTGGACCTGGTGCAGCCGGCAATCCGGGTGAGTTCGGTGGGCAGCCG  
CAATTTGGCGGGCTGCCGCCAGCTCGCCCGAGACGCTGGAGCAGCAACAGCTACT  
GGCCCAAGCCGCAGCGGCTGCCGCCGAGCTGGTGGACCGGACAAGACCGCCCGCG  
ACGATGCAAACCGTCAGGATGACAAACGCCAGTTCATGGACGAGAAACGGGATACC  
GGCAGCTGCAATCGCGTCTCACCTCGCCGGCCACGCCACCGTCGTGAGTGCCGGC  
ACGCTCATCCCTGCCCTGTTTCTGACCGGGATCAACAGCGATCTACCCGGCCTGATC  
ACCGCACAGGTGTCACAGCCGGTCTATGACACCCCAACCGGGTACCACGTCATCATT  
CCGCAAGGCTCGGTGCTGATTGGTGCGTATGACTCGCGGGTGACTTTCGGGCAGAAC  
CGCGTGCTGCTGGTCTGGCAGCGCCTGCGCTTCCCGAACGGCTCTAGCCTAGACCTG  
GAAGGCATGCCCGGCGTGGACCTGTCGGGCTACGCGGGCGTATCGGACAAGGTGAA  
CAATCATTGGGGCAAGGTGCTATCAAGCGTGCTGCTGTCCAGCACGGTTGCGGCGGC  
GGTGGCCACCGCCGAAGGGGATAGCTTTTCCTCCTTCCAGCGTGACGCCGGTCAAGC  
CGCTTCCCAGGGCGCAGCGCAGCAGATCAACCAGGCCGGCGCACAGCTGCTTCAAC  
GCAGCATCAACATCCAGCCGACGCTGGAAATCAGGCCAGGCCAAAGGGTTGCGGTG  
ATGGTCAACAAAGACTTGGCGCTGCCGCCCTATGGCCCGTGATCGCGATCTAACGTG  
TGCAATATCGATAAACTCCGAGGGCTTTACCAACCACCCAACGGAGCCAAAAGCTA  
TGCCTGCAAAAGCCGCTCGGCGACAAGTTGTCGCGAACGTGGCCCCTAAGCAGATG  
AAAGCGATTGACCGCGATGCACAGCGCGCCGGACTCAGCCGGCGAATGTTTATGCA  
ACACCTCATGGAAGAATTTCTGCTTCAACCCACCACCCTTGTGGCCGGCGGGATCTA  
TCGCAAGCTAGATCGCGAACGTCTCCGCTTCCACCTGTCCGTTCCACTGCACAACGC  
TGTCAGCAAATACGCCAAAAAGCTGGGCGTACGATCAGCGTCGTTATCACCACCG  
CTGTAGCCAATCGCTACCCGCTCTAGGAACAACCTACATGGCCCGTCAAGCATCGGCA  
CTGCCGAAAATCCCCGTCAAACCGAACGCGTCACCAAGCGCCTGCAATTTCGACCC  
GGCGTTAGTCAAGCGCGTTGACGCCTTCTGCGACTTCTACGCGCAAACCGCTGGCGC  
AAAGCCAGATTGGAACGATGCAGCCGTTGCGCTGATCGACCACGCGCTAGAGCGCA  
ATCGCGAGTTCGCCAAGTACCTCGCCGAGCAAGCCAAGCCGGCCGCATGACCGCAC  
CGTGACGCCCTGAACCGATGCGGCCACCCTCGCGTGGTTCGCATCGGACAACCGCCG

GAGTTAGTTCATGAACGCATCCGAAAAAGCCTGGGATACCGCATCGGCGAAATGC  
TCTACGCCATGTGCGCAGTGGTCACGCCCAGCCGCGCCAGCATTGTGATCGTTGGCA  
TGCTCGCCGCCATCGTGTTTTTCTGGCTGTCCATGCCGGCCGCCGCCGTCGCCATCGG  
CTTTGTCTCGCTGGCGACGTTCTGGCTGCTGCTGCCACCGATCCGCCGGCAGACCC  
AAACAGCGCTGCCAACGACTCGGAGGGCTGACCATGCGCCTGTGGATCTGCGAGAA  
GCGCGACCAGGCCAAGAACATCGCCCCGCTACTGGGCAACCCAAAACCTGGTCAGG  
GCTATATCGATACCGACGATGGCCGTGTACGTGGGCACGTGGCCACCTCCTGGAAC  
AAGTCGCCCCACCGGGCTACGACAAAGCATGGGACGCCTGGAATTTGACGTCTTG  
CCCATGATCCCCAGCACATGGAAGACCAACCGACTGCCGACAAACAGCGCGAGCT  
GGCCGTGCTGCTGGCCAACATCCCCAAGGCGACCGAAATCGTCATCGCAACCGACT  
GCGGAGCCGAGGGCGAAGCGATCGCGCGCGAGCTGCTGGACCACGCCGGCTATCGA  
GGACCGGTGCGCCGCCTGTGGTACTCCGCGCTCGATGTTGCAAGCCTACCAAGGCT  
ATTGCCACCTTGCGGCCAGGGCGAAAGTAGCGAGCCGCTCTATTGGGCAAGTCAGGC  
ACGCTCGCGCGCCGACTGGCTCATGGGCATGAATCTCACCCGTGCCTACACGCTGCG  
GTCCCGTGCTGCGGGAGGTAAAGGGCCGCGCCACGTGGGACGGGTGATGTCGCCCA  
CCCTCGCCCTGGTCGTGCGTCGGGATGCTGAAATCGCCGCGTTCCGCGAAGCCACCT  
ATTACGAGCTGGAAATCACCGCTCAGACCGCACTCGGGGCAAGCGTCGTGCTGACG  
CACGCCCCGGCGGATGCGGGGCGGATCTTCGCTCGCGCCGACGCCGAAGCCATCAT  
CGCCGCCGCCACCGGAGCTAGTGGACCGCTCGCGGTACACATGAAAGCAAGGCGC  
AGAAGCCCCCGGCCCTGATGACGCTTTCGCGCTTCCAGCAGCTGGCCTCGCGGCGAT  
TCGGATGGAGCGCCAAAAAGACGCTCGACATCGCGCAAAGCCTGTACGACAAGGAG  
CTGACCAGCTACCCACGCACGCCGTGCATGGTGTACCCAATGAGCAGGAAGCAGA  
AATCCCCCGTGTGCTGGAAACGCTCGCCCAGGTGCCAGGACTGGCGCGGCACGTGG  
CAGCACTGACCGTCAACAAACCCACCATCCGGCCCCACTGTCTTCAACAGCGCCAAG  
ATGGCAAAAGACAAAGCAGAGCACCATGCCATCGTGCCACGGGTGTGCCGCTCGC  
CAGCCGCACCCTCAGCGATGACGAGCAAACCGCCTTTATGCTGATCGCGCAGCACT  
ATCTTGCTGCGCTGCTGCCCCGACTACACGTTCAACGAAACCCGCATGACGCTGGAAG  
TCGGCGGCGTGCCGTTTACTGCCACTGGCCGCGTTCCACCGGCCAAGGCTGGAAAT  
CCGTATTTGGCACGGACCCGGACAGCGAGGACGAGGACGACACGGCCACCCCTGCG  
CTGCCTGACATCCAGGACGGCACGCGCTGCACTGTCGCTGCGGCCGCACTACGGCC  
GAAGAAGACGCGACCGCCCAAGCGCTATACACAAGGCGACTTGATCGCTGACATGC  
TCGATGTGCGCAAGTTCGCCACCAACCCCGAAGTGCGCAAACGCCTGAAGGAAAAC  
GCCGGCATCGGCACCGACGCTACGCGCGGAGACATCATCGAGAACTTGCTCGAGCG  
CGGCTACCTGGAGCCGCAAGGCAAATTCATCGTCAGCACGCCACTGGCGCGTGAGC  
TAATTGCAATGCTGCCTGCCCCGATACCGACGCCGCCACCACTGCGTTGTGGGAGG  
AAAAGCTGGACGAGCTGCGCCGTGGCTTGGTGCCGATCGAAGCGCGCGACGAGTTC  
GTTTCCAAGGTGCGCGCCAACGTACCCGCATCATCGAAGCGGTGCGGGCCGATGC  
GACCAAGGCTGCCGCTAACCGCGTGCCAGCGAAGGCCAGCTGCGCTATGCCCAGC  
TCATCGCAACGGAGTTGGGCGTCCCGCTGCCGGCCAACGCCGTCAGCTCCCACGTTG  
CCGTGCAGGCGTTTCTAGATGCCACAGCGCTACCTACGGTAATTTGCCGCCCAGTG

AGAAGCAGCTGGCCTACGCGGAGAAGCTGGCCACCGAGAAGGGCGTGACCTTGACC  
GACGAGCAGCGAGGCGCACGTGCCGCGCTGGGCGCATTCCCTGGACCTACACGCGCC  
CAAGAAGCCCAAGGCATCCCCGCCAAGAAGACGACCACCAAAGCCGC

>CONTIG\_47\_length\_8611\_cov\_23.156530

CAATCACCGCGTGGGGGCGCTGGGCAGGTTCTCGATGGCTTCCACGGTGCCCTGAA  
AGCGGCGGGCCACATCGAGATTGACCGGCTGGCCGTACTTGAGACGCTAGCCGTTTCT  
GTGCATCGGCCAGCTCCATGCCGCGCATGTCTTCGTCAAAGCCGGCCTTGAGGCTCA  
CGCCCGCAGGAGTGCGCTCGGCCATCCGCAGTGCAACCAGGCGGTCCGTGCGCGCT  
TCCAGCGCTTCCAGGAAGTGCCTTGCCTGCGGGTGCGGCTGGTGGCGCCCTTCATC  
TGTTCAAGGCGACCAGCGGCCAGCTGGTCGTCCAGGAACGTGCGTGCAATGACCTG  
GCTCTGCTGAGGCAGCGGCCCTTCCCAAGCACGTCCAGGCGCACAAAGGCGCGCT  
TGGGGTCGCTGAGTGTGGGATCGGCGTTGACACGCTCCACCAGGTGCGCCGGCACC  
TGGAAGGTGCCGTCCTCCAAGTGGTTCACATGGCCTCGGTGCGCCAAGGCGTCCATG  
CGCCGCACGTGCGCCTCGATGTAGGACTCTGGCGTTGCGTTGCCGGGCAGACGTTTC  
GGGTCCCATTGCTTGACCTCTTCCAGGTGTGCCTCAGGGGAATAGATCTCATCCTTC  
AACCGCCGCAGCACGTTTTTGTCTGCCGCGGTGGCGACGGGCGGGCGTGTAGCTGTGC  
AGGGTCACGGTGTACCGATTTGCCGCGGTTGACACAGGTGCCGCTCCGACGGGGC  
ACTGAGCGTTGCGTAATGCACTTGGCCGTCGAAGCCGGCGACGACGACGTATTCGG  
CGCCCGTTGCTTGTGCGCCTGCCACGGTCGAGAATGACGCCCTGGACCGGTCCAG  
ATGTCTCTAGGCTCTTTTCGTCTGCCAGTCGCCCGCTCTGGCTCCGCTCGGCTCGAAG  
ATGCGGCTTCAACAGTCCCGCCACCTGGTGTCTTCTGCACCATCGCGCGCTCCATGTC  
GCGCAACTCGTCGTCAAAGCCGGCCTTCAGGCGCACCCCAGCGGGAGTGCGCTGGG  
CCAGCTGCAACTCAACCAGGCGGTGCGCACGCGCTTCCAGTGCGTCTAGGAATTGC  
ACCTGGGTGCGTGTGCGGATAGTGGTGTCTTTCAGCTGCTCAAGGCGACCAGCGGCC  
AGCTGGTCGTCCAGGAACGTGCGCCCGATGACTTGGCTCTGGCGGTTGAGCGAGCCT  
TGCGCCTTAACGTCCAGACGCACGAACGAGTTTTTGTACGGGCAATGGCTGGATCA  
CCATCGAGCCGCGCCAAGAGGTCTGGCGGCACACGGAACGTGCCATCAGGCAGCTT  
GGTGACATGTCCTCGGCTCGCCAGCGCTTCCATGCGATTGACGTGCGCATCGATGTA  
GGACTCCGGCGTTGCATTCGTAGGCAAGCGCTTCGGATCCCACGCCTTCACCTCGGC  
CAGATGCGCGTCCGGGAGATAGACGCCGCTCTTCAAGCGCCTTAGCACGTTCTTGTC  
CGCAGACGTGGCGGCTGGCGGCGTGTAGGTGCCAGCTCCACTGTGTGCGCGATGC  
GTCCGCGCTCAGGCATGTGTGCTCTGAGTGCAATGCTAAGCGTCGCGTAATGCACCT  
GGCCGTCGAATCCGCCAACAATGACGTACTCGGTGCCTGACAGTTTGTCCGCCAATC  
CGCGATCAAGGATGACACCCTGCACGGGTGCAGCTTTCAGACTGTCCTTGTGCGGCCA  
GCAGTCCACGCCGGCTACGTTCGGCATCAATGTGCGGCTTAAGCTCTGTTGCTAGCC  
TACGCTCTTGCGCCATCGCACGCATCGCCTCCGGCGCGTGGCGTGGATCTTCCAGC  
GACCGGGCATCTGTTCGGTGGCTAAGCCGTGGTCACGCAGGATCGCCAGTCGCTGTA  
GCCGCAACTGCCGCTGTGCATTGCGGAACGGATCTGCATGCACCTTACCGGCATGGA  
TTAGCCCGCTTTCGCGGCTCTGCTGCTCACGAAGCATGGACGCATCCAGACCCGTCC

AGCGCTCTTGCGTGACCTCCTTCGCCGCAGAGCGATAGATGTCGATATCGCTCCGGT  
ATCCCAGCTCGCGTGTTGCCAGCTCACGTGCCCCTCGCGCATGCCATTGCTGATGT  
AGTCGCGGCTAATCACCAGGTCGCCGCCCTTGTCATCCACCCACGCACGATGATGT  
GCACGTGCGGGTTGTCGGTGTCATGGTGGGCGACGGCCATCCAGTCCAGTTTCGTCC  
CTAGATCCTGCTCCATCTGTTGCATCAAATCGCGAGTGTAGCTTTCTAGATTCAAGTT  
CGCGCCATCTTCCGGCGAGACGATGAATCGGAACGAATGCCGGTTCAGGTTCTGCCCT  
GTCAACGAACGCGATGTCTGCTCGCGTGTGAGTTCGCCCGTGTCCGGTAAAAGGGCG  
GGCCGGCCACCATCCTTGTCTACGCCGTGGCGTTGCGCATAGTCCACATGCCGCTG  
CATTGCGGCTTTTGCTCCTACCCGTGGTGTGCAACCACACGGGCCCTTGATGGTGAC  
GCGCTGCTGTCCGGTACCGGTGTTGATCCTGACGCCAGCGCCGCGCCAGCATGGTG  
CGTGGTCGCGCCGGAAATGCGCCCGGTCCGTGCCGCCCGCTTGGCAGCGCTTTTGAC  
ACGGCTGATGACTTCGTTGACCTGGGAGTTGTTACGCGCCTGGCGGCCCTTGACAA  
GCGAACGCGCAGCGGTTTGTCCGGTGCTGCTTGCAACCCGGACCGCCCTTCCCAGCGCC  
CTGGTCCGGCCCTGCTGAGTTGCGCTTTTCACTGCCGACCACGGTCGTCTCCCGGCC  
CTAAAACTTATGTTGTAATTTACAACAAAGCTAATCGACAATGTTGTAATAAAAAG  
CCAATAGAAATAGTCAGTTAAAACCCACATACCACACACACTTTTATCTTGCCCTTC  
TTTATCGCTTCTCCGCTTTTGCCTTCCGACGCCCTCACCCCCTCCGATCACACCCACC  
CTTCGCAGAAACCACAATGCCCGCCCTGGGACTGCTGTAGCGCGTCTCGCAACCGTC  
GGCCTCGACCAAGCCCCACCCTATCGGACGCTACCCGCACAACGCCGCACAAGCGG  
TCAGCGTGGCCTCGGTTGTGCAGCCTTCGGCCCGGTCCCTGCGAACCCCGTGGGCGC  
GGCTGCGGGCGACATCACGGGAACAGCATTGGCTTGGGCTTTGGTGGACCGGCGGC  
CGCTCGCCTTCCCGCTTGCCGGGAAGTTCACCGCCACCCAGCCGCTTGCGACACCC  
AGCTCACGTAACCATTTGCTCAATCCGCGCGACTCGTTGCCGGTGTGTACATCGACA  
AGGCGCCCAGCAGCGCAGGCTTTTCGGCGCGATATTTGGCCCATGTCTGGGCGTAGT  
TCCGTGCCAGAATGGTGGTGCCAATTCGGATGTTTGTGCATGGGTCTAGTAGGTCAA  
CCGGCGTCACTCCGAACCTTGGTCAGGTGCTGCGAGTTGATCTGCATCAGGCCGATAT  
CGGTACTGCGACCGGCCCGCACCTGTTCGATTGCGATCCGCTGGGCATCGTCAAACC  
GGGTGCGGTAGAAAGCTACGGACCTGGTTGTTGATGGCATAACGGATTGCCGCCACTCT  
CATGCTTGATGATCGCCTGCACGGTTTTCGGATGCACACCGATTGAGCAAGCGAGA  
ATCACTGACATCAGGTCACTCATGATCGACTCCTTTTCGAGGGCGCTTGCGTCCACAA  
CGGTGTGATACGTCCGGCGATTACTGACAACGGGACGAATCCGTAATAGCGGCCAT  
CAAAGCTGTTGGCGAGGCCATCACCAATGGTGAAGATGTGCCAGCCGGAACCCGC  
GTGCAGCCTTGTAAGACGTGAGGCAGTGCCACGCCTGTTCCGGTCCGTGGCAGCGAC  
CGCACCCACACGCCGATAGGTGGCTGGGTGCCCTGCGGTGCTTGGGGTTGCAATGCT  
GACCTCGCTGTTACGCACACCGTGTGCGCCAGCAACCGCACCGACACGCTTGATGTA  
AAGACTGCCGGGCTTCATCCAGCCGCGTTCAAAGCCATAACGCGCTGCCGCATTATG  
TGGGGAGAATGCGACCAGCTGGCCCCGCTCTGCGCTATGCGTATTGCGATTCAAGAG  
GTACAGACCTTGCGCCACGCTGGGCGAAAGGTTGGCAATCACGGTGAAACCTAGCG  
AGGCCAGACCGCGCGCACTTGCCCATCCAAGTGTGGGGGCAATTATTGCTAAGCCT  
AGGCCAAGTGCTAGCCCTTTGATGAGCTTCTTTCGTGTCACAGACATGCCGCTAACC

TCGCCTTTTGCAGGGGAGTTTGGCTCTCACGTCGGCGGTTAAGACCTTCAACCGCGC  
CAGTGGCATGCGCTGAAAAAACTGTTTCGATACGCGCCAATTCTAGCCGATTCAGGGT  
GTCAATTTTTGACCGATTCAGGGCTAACCAGGCCACATAAGCGCGCACCCGTGTTGC  
GCCTGTGATGTCGGCCAGAATGGCGACATCTGGGCGCACTGCCGGCACGCTTTCGCC  
CGCCTGGCCGGCCGGCAATGCCTCACACAGCACAAACCCGCCATCGCGTTGTGCCGTA  
GTCATTCTGCTCCCATAGATCGAGTGCAAACCGGTCACCAGGTGCGAAGCTCAGAA  
GCCGGCGACGGGTACCATCTTCGCCGATCACCCAGCGGCCAACCTGGCGCGGCTTG  
CCGGCCAGAATCCGCCGGTTTGTCCAGCCCTTGCGGAAGGCTTCGATGACCTGAGCG  
CCCATTGCTATGGCAGCATGCACGCAAGCTTGACGACTTGCATGCAAGTTGAGGGCC  
GATAGAAAAAGGTTGCTTGCCCTGCAAGCTGCGGATGCAGCTTGACCGCATGCATGC  
AGGACCGCCACGACCATGCATGCATGGCTGCATGCACTCTTGGCAGCTTGCATGCAA  
CGCGGTTTGCACGCATGTACGCAAGCAAACCTTGCAATCAAGCATGCACGCAACCTT  
GCATGCACATAAGCGAGGCACCAAGGCAGCGCGATCGCAAGCAGTCAAGCCATTTT  
GCATGCAAGATGGCTTGAATTTAAGCATGCGTGACAGCTTGCATGCGCACATAGCTT  
ATTCGCTCTGGTCCCCGTCTACAGCATTGGCCATCGCTGAGAGCGGTGCGAGTCCCA  
TCGATTTTCAGGAACATGGACATTCCTTGGATCGCAATATCTTGGATGGTCAGACTAT  
GGGTATATCGGAATTCTGAAAGCCGGCGCAGGTCATCGTCGGTCAGGTGCCGGATT  
GTGATGGTGCGGTTTGCTCCGACCTTGGGTGCGCTCTTGCCCCGGGCTTGCTGGGCGG  
CTGGTGCTTGCGTGCGGGTAGTGTGCGCTGCCGGGCGCGCCGGCTTCTCGGGCTGG  
CTCTTGTTCTTGTCCAGGGCGGCAAGCTTGCCAGTAATTCCGGTAGTCATGCGTTGGT  
TCCTTTGGTTGCGCCGAGTAGCGTATTCACCTTCGCGCCATAGGGCGCGAACCTCAAA  
TGCCGCCTTGCCGGCCGGCTCAAATTCGCCCACGGCCTGGCCGTGAGCAAGAGCAC  
GGCGATACGCTGTGCGGTCTGGATGACCGTTTCCAGCACCCGTATGCCGGTGCTGG  
CTAGCTCCCGCTCGACCTCGCGCGTCTCGCTGGCGCGTATCGGAGCGCTGGACAGGA  
TGAAGGCCCCCGGCTTGCCGCTGGCTTGACGCAACCGGATGGAGGCCGGGGCGGCG  
GTCAGGTCCAGCAGGCTCGGCCGAATCGGCATCAAGGCAAGATCCGCATGCTCAAG  
GGCAGCGGCGATGCCGGCCGACGCGTGCGGCGGCGTGTCACAAATCAACAGGTCAT  
AGCCCTCCTCGGCTGCGGCCGCGACAGCGGCGCCGACATTGGCCGAGGTGATGGCC  
ACCACCTCCAGCGCGGAATTTGAACGGGTTTTCGGCCCATGACTTGGCCGAGCCTTG  
GGGTGCGGTGTCGGCCAGCGCGACGCGCAGACCCGCTTGTTGCGCGGCCACCGCCAG  
ATGGACCGCGATGGTCGTTTTACCTGCGCCGCCCTTCTGGACGGCTATGGTGATGGT  
TTTCATGCACTGCGCTCCTGGTGGAAGTCGCTTGCTTGAGGGCAAGTGTGCAATACC  
TTAGCAACATGCATGCACGCATGCAAGCCGATTTAGCTGCACGCATGCATGATCGCA  
AGACGGCATGCATGCTTAGCTGGCGCCCGCGCCCCGCGGGCTTAGCCTGGCCGGCCTT  
TGGCGAGGCGGGCGAGGTAGCCACCGACTCAAACGCTGCCAGCCGGCCCCGTAGGT  
TCGCCGCGTCTCGCGAGCCTGGCCGGCAGCGTTGCGCTGCTCGGCAGCAACCAGGT  
GCGCCCATCCAGCTCGGTGCGTAGCTCGCTGGCGCGGGCTTCTGCCGTGCTTGAC  
GCTGCTGTAAGTCCATCAGCTCGGTGCGCACCTGGTCAAAAGCGGCCTGGTGGGCG  
ACTGCGGCCGAGGCGGCCTGCTGCATGGCGGTGTCCAGCTCGGCAATCCGTGCTTGG  
GCCGCTTCCAACCTCAAGCGCCTGGGCTTCGTAGGCGTCGGCCATCTGCTGGCTCAGT

GCCTCCGCCTCCTGCCGCTCGGCTTCCCACCCTGCCTGGGCTGCACGCAGCGCGTCG  
TTGGCCGCCTCTTGGGCGGCCTGCCAAATCGCCCCCACCGCCGTGCCGGCGGCCAGC  
TGACCGTCTCGGGCACCTGGATGGCAGCCGGAGCCGGACGCGCTTGCGTGCGCCG  
CCACTCTTTCATGACGGTGCTTGCCTCGTTTCATGTTGACCTTAGCCGCCTTGCGCACG  
GCATCGACGGTCGGGAAGACCTCACGCCCCGGCCTGGTCATACAGCGCATCAGCAGC  
CTTGAAGATGCGATCACGTGCGTCTTGGGACGGGTCCATGTGCGGGCTCCTGCGGCCT  
AGTAGGTAAGAAGAATAATAATATTCTTCTTACTGTGCAACCGGGTTTGACAGTT  
GATTGCATACCGTTTCGTGCGGACGTGGTGTGATCGCAGCTGGCGGACTCGGCGAGG  
CGTACACGCACACGGCTGCACCGCGCCTAGGCATCGGCGTGGGTGTTGAGCTGGGC  
GGGGTCGGCGCTGACGCGCGGCGCGGGTGCACCTGGTCAGGTGCAAGCCAAAAAAA  
ACGGCGCCCGTTGCCCGACGCCGCTGCGTTACGTGTTACCTACCGCTTACCGCCTCG  
GGTAAGACCGGCAGTGTGTTCTGACCGATTCCCACCGCCCAAACGGCGACGAAGG  
TAGCGGCGAACACTCACTGGCTTGGGCCAGGTACAACACTACAACAGATGACACTGCT  
CATAAAAAACACCTATCCCATGAGGAAAGGTGGTCTCCACAGCAGCCCGGCGCTAG  
CTGCCTGTTTCGAAAAACACTTACAAAAAGCTAACGCAATTGCGCTATAATTTGAAA  
CACCACGTAACGAAGTCAAAAACGCAACCTTGCTGCCGTGCAAGGCTGTATAGCTG  
GGAACCTCCTACACAGTCACACCCGCTGAACCATTTTCAGCTAAATGCACCCTTTAAA  
AGCTATCTGCTGCCAGGCGGGTAGCTTTTTCGTGTGCATCTATCACAGATAGTGACA  
CAGTGCCGTTTCAGATTGCAAGCAATCTGCCGTTAATGGGCGTTAGATCCGCACTGAT  
TGTCTGCTAGCGGAACAGTGGCGTTATTTCCGGCATGGCCGCGCTGCCGGCAACAC  
AATCCACCCGTTAGCACCCGTTCTGGGCTTGTTGAGTCCGTTTCTTTTCGTGCTTCCG  
GCACCGCGCATCACTCCATCGGCAGTGATCGTGTGCGCTCTGTGTGCGCGTAGCGCA  
CGGCGACCGCTCTTAAACGCAGACCACCCGAAGCCGGCAGCCCTTCCAGGGTCATG  
CCCTGTCTCGAAGTCCGGCTAATCACTCCCTGCTGACCCGCTTTTGCTGTTTGCGGGA  
GGGAACCGCCGCCACTGCGCGCCGGCTCTGTTTGGTTTCCCGATGTTGCTTAGGCGC  
AGTGCGGTGGGAGGGGCGCAGCCCCTCTATTGAGCTTCTAACGCTGTCTGTCGTCGC  
GCAGCGGCGGCGACGCCGATCAGCTGTTAAGCGCTCTACTGACTGTGTTTTCAACCG  
TAGGTTGACTGGTTGGCCTGCCAAATAAAGAGGACAAATAACGCCACTTCCCCACA  
GGCTTCCCACAGGCTTGTCCCCCGCAGCGGTGGGTAACCTCGCTGCGGGGGAGTCCG  
TTGGTGGCGAAAGGCGGGTGATCGAGGGAGGGTGTGGGCGTCGCCCCGCCCTGGCG  
GCGGCAAAATTGCTACGCGGGCGCCTGTTTCCACGGTGCGGGGCAGGGGCCAGCCT  
GCCGGCGGCGGCTACTCGAACAGGGAGAGGATGTCGGCGATGTGCCGTGTGGCGCT  
CTGTGCGCCCCTGACGGGTGCGCAGTGGCGCGGTGTGTGCTGGGCGGGCATCGC  
CCGTGCGTGCCCTGGTTGCCGCCTCTTGGCGCGATTGACGGCGTGCTTGCGCCTCCG  
TGAAGGAGGCCGCGCCGGACCCGCGCGCCTGGTCGGCGTGCTGGCGGTGCGGCTTG  
AGCAACCAGCTGGTGCCGGTCATGGCGCACAAACGTTGTAGGTTGAGCCGGCGCAC  
GCCCCGCTCGCTGCGCCACAGGTCGCCGCCCTCGGCGTCCTTCTTG

>CONTIG\_48\_length\_8450\_cov\_19.840322

GGGTCGCACCGCCCCGGCAAGGACGGTGGCACCGACATCATTGCCTACAACGATCCG  
CTCGGCACACGCCCCGCCGCGCATCAAGGTGCAGGTCAAGCGCAATGCCAACTCGCC  
GCGGATCGATGTGACGGGCCTGCGCAGCTTTATGGCGGTTCTGGGGGAGGGCGATG  
TCGGTCTGTACGTGCGGCTGTCCGGCTTCACCAAGGACGCCGACTATGAGGCGCGGC  
AGTCGCATCGGCGGATCAATCTGATTGATGCGCGGAAGTTGGTGGAGCTATGGACC  
ACGCACTATGCGCAGCTCAGCGACATTGCGCGTACGCAGCTGCCTTTGAAGCCGGTC  
TGGTTCCTTGCTGCAGAAAGCTAATTGTCAGCGAAGGCAGTTCGGTGAGGAGTTGAA  
TCTCGGTGCTGGTTGGGGATGATGCGCGGCAAGCTCAGCGCACACGAGTGAATTGAC  
CCGTGTGCTATTCCATATCCTCAAGGAATAGCCGGAAGGCATGCGCGCATCCGGTGC  
GCTGGTTGCTTCGGAAAAGCAGGTCGCGTTGATCGAGTAGTACGAAGGATTTAACTA  
TGAAGAACCAAATCTAATCCCCATTCTGTTTCGGAACGCTTCAGTAGCGATAGCGGT  
CACTTCGTAAAGGCGCGTCCGATGGATTTACAACCGCGACATTCAGTCCCCGTCATA  
CTTGCCCCGCCGACGCCCTTGAACCTCTCCACAAAAGCGGCGACCTTCTGGAAAACGA  
CGCGCTTCTTGACAAAGTACTGCGGATTCAGCGGGCTCATCTTGGGGCAAATCGAAT  
TGAGCTCCGTGCCATTCTCACTGGCAAATTCCCGCTTGAGCGAGGCCGTGATGTATC  
GCCTAGCAGCCTCGGCATCGAGATCCTCGGCAACAATCAACTCTTGAGCTTCACGCC  
GCTGTTCCGCCTGGGCAAACACAAAGAAGGCGTCAATTACGCTGGCCTTGTCGCCG  
ATCTGATCCAGATCCGTCTGATTGATGAAATCTACGACGAGGCTTTCTTTCGCGCGG  
TTACCGAGGCTGCCTCGAATCACGCGGCGCACTTCATCCACCAGCTCCGACTTGCTC  
TTGACTTTCTTGTTGTGCTCGAAGATCAGTTCCAGGATGTAGTCCAGGTTGATTTCTT  
GCGACTTCAGGAGATCCACCTCAAAAACACGTCATCCCAGTCGATGGTCGATTTTT  
CCTTCTCGGCCCCCGGCCTTCTCGCGCCGCGAGCCAGTCGCGCACGTCGTTGTAGGTTG  
AGCGGTAGTCCTGGATCTTCCGCTCTGGGGGGAGCGTGATGGCTTGCAGCGCCGTTA  
GATCCTCATCGCTCAGGTAGTGCTTGGCCTTGAAGGACTCCACTGCGGCGGCATCCG  
TCAGGTCGACGCTCTGAAGCTCCTTCAGGCTGGCGAACTCGTCGTAAGTTCTGCAGGA  
TGTTCTCGACGCGCAGGTACTCGCCAAAAAGCTTGGCGAAAGCCTTCTTGTCGGACT  
CCTTCTCGATAGCTGCCGGGTCTGGGAAGCGTGCTTCCAGTTCCTCCACTACATCCTT  
GAAGCCGCGCCGCGCTTCACCAGTTGCCGCATCGGTGAAGCCTTCCATGTACTCCGT  
GTAGCTCTTCTCCAGCACACGTTCTTGGTGTCTTGTACCAAACAGGGTGATGGC  
GTCGATCGTCGCCTGCTCCAGGTCGCGGAAGGTGACGATGTTGCCGAAGGTCTTGGT  
GGCGTCAAAGATGCGGTTGGTGCGCGAGTAGGCCTGCATCAGCCCGTGGAAGCGCA  
GGTTCTTGTCGACAAACAGCGTGTTGAGTGTGGGTGCGTCAAAGCCGGTCAGGAAC  
ATGCCCACCACGATGAGCAGGTCGATCTCCTTGGCCTTCACCTGTTTGGCCAGGTCC  
CGGTAGTAATTCTGGAAGCCGTTGCCGTCCACGCTGAAGTTAGTCTTGAACAGCGCG  
TTGTAGTCGGCGATGGCTGCGCCAGGAACTCCTTGGCGCTGCTGTTTCATGGCCGAC  
ACATCAAAGCTCTCGTCCTGGATATCGCCAATCGCATCCTGTTCTCGTTGGCCGCG  
AACGAGAAGATGGTCGCCACCTTCAGTGGCTTGTGCGCTGGTCTTATGCAACTCCCGG  
AAGCACTCGTAATACAGCTTGGCGGCATCCACACTGCTGACGGCAAACATGGCGTT  
GAAGCCTTTATTGCCGGCATGCAGGCGGTGAGTCTTCTGTGCGGAAGTGGGTGAGAAT  
GTACTGGGTGATTTGGCGGATGCGGTCCGGGTGCAGTAATGCCTGCTTGTTCTCGGC

CGCACTCAGCTTCTTCTCGTCCTTCTCGGTCTCAATGGCCTTGAACTGAGGGCGTACA  
TCGTTGTAATCCACCTTGAACCTTCAGCACCTTCTCGTCACGGATGGCATCGGTGATC  
ACGTACGAGTGCAACTCACGGCCAAACACGCTGGCCGTGGTCTCGGCGCCCAAGGC  
GTTCTCCGGGAAGATGGGTGTGCCGGTGAAGCCAACTGGCAGAACTTCTTGAACCT  
CTTCTTCAGGTTCTTCTGGGCTTCGCCAACTGGCTGCGGTGGCACTCGTCAAAGAT  
GAACACCACGTGCTTGCTGTAGATGGGCAGGTCCGCCTCGCTCTTCATCAGGTTGTT  
GAGCTTCTGGATAGTGGTGACGACAATCTTGTTGTGTCCTTCTCCAGGTTGCGCTTC  
AGGCCAGCCGTGCTGTCTGAGCCATTACGCTGTCCGGCGAGAAGCGCTGGTACTCC  
TTCATGGTCTGGTAGTCCAGGTCCTTGCGGTCCACCACGAAGAAGACCTTGTGATG  
AAGTCCAGCTCCGTGGCCAGGCGCGCCGCCTTGAAGCTGGTCAACGTCTTGCCTGAG  
CCGGTGGTGTGCCAGATAAAGCCACCACTCTCGGTGTTGCTCCAGTTCTTGCCTGA  
TGGCTGCTGTTGATCTTCCACAGGATGCGTTCCGTGGCCGCGATCTGGTAGGGCCGC  
ATCACCAGCAGCGTATTGCTAACGTGCAACACCGAATAGTGCAGCAGCACGTTGAG  
CAGCGTGTGCTTCTGGAAGAACGTTGCCGTGAAGTCCTTCAAATCCTTGATCAGCGT  
GTTGTCCGCCTTCGCCCAGTTCATGGTGAAGTCGAAGCTGTTCTTGTGCGCTGCGTG  
GTGTTGGCGAAGTAGCGGCTGTGCGGTGCCGTTGGAGATCACGAACAGTTGCAGGTA  
CTTGAACAAGGACTGCTCGCTGTTGAAGCTTTCCTTGCTGTAGCGGTGCACCTGGTT  
GAAGGCCTCGCGAATCGCCACGCCGCGCTTCTTGAGCTCCACCTGCACCAGAGGCA  
GGCCATTGACCAGAATGGTCACGTCATAGCGGTTGGCATGCGTGCCCGCCTGTACGA  
ACTGCTTGAGTACCTGCACCTTGTTGCGAGCGATGTTCTTCTTGTCCAGTAGGTAGAT  
GTTCTGGATGCGCCCGTCGTCAAAGACAAAGTCGTGAACGTAGTCATCATGAATCTT  
GCGGGTCTTCTCGACGATGCCATCGCTTGGCTTGTCAGCCAGCTTTCGACAAAGCG  
CTGCCATTCCACATCTGTGAACTGCACGTGGTTGAGCGCCTGCAATTGCACGCGCAC  
GTTGGCCACCAGGTCGGCAGGGGTCTTGATGGACGAAGCGAACTCATAGCCCTGAT  
TGACCAGATCCTGAATCAGCTCGCGCTCCAGATCACTTTCGCTCTGGTAGCTCTCGG  
CGACCTTCCACTCCCGGGTGTACCGGTCGAGGACGATGAAGTTCCTGGACTCGGCGA  
TCGTCTTGTAGTCGTTTCATGGGTCAGGCGCTCTGTGGCTGCCAAAAGGCATGACTGT  
TCTTCAGGTGGTCAAGCAAGAGCTTGACCGTCGCGCTCTCGGCCGGCGATGGCTGTG  
CAACGGCCTCACTGGACAGCGTGCTGTGACTGGTGAAATTGATGATGCGGGCCGTAGT  
ACAGCTGTTTATCGTCTGGCAGAAGCTCAGACCACTTCGGGTAGCCCAGGAAGCCG  
GCCGTTTTCTCGTACAGGTTGCGCAGCAGGGTGAAATGAAACCGCTCGACCTTGCTA  
TCAGCTATGGCCTGCTCGATGGTCTGCAGCAGGTGCAGGTGATACGAAAAGCTCTTG  
TTGGAATCGCCCTGCTTTTCCGTCAGCGCGTAGCTGCCGTCTTCGAAACGATCGAGC  
ATGTAGCAGCTCTTGGTCTTGAGCTCATTGAACAGCACGTTGTAGAACAACGGGCTG  
TGGTGGTGGTGGTGAACCTTCAAGTCAGACTCACTGGATTTGATCAGCCCAGCCAGA  
TTGACCGCCAGCTCGATCAAATGGTTTTTCATCCAGTGAGCTTACCGGGTCATCCAG  
AAGACGTGGGTCAACTTGTTGAAGACATTGGTGGAGCGGTCGGCGACTTCCGGGAT  
GTTGAGTTCGGCGATCACTTGCTCCAGCAGGGTATTGAACAAACCCAGATGAAGTT  
GCTTTCTTACCCCTTGGAGATCTTGATGTGGGGCTCGGGAGCCTCGTTACCGCGCTC  
GAACGAAAAGCTGACAGAGGAAAAGTCCGCGCTGAAGTGTGGCGTCAGCTTGTGCGC

TGGTATAGCGCTGGAAAGTGGTGATGACGCTCTGGTCCTGGCCTTGCTCCTCCAGCA  
CCCACCTGGTGAACGCATTGGGCTGGATCCTCAGCTTGGGCTCGGCATCCCGTCCCA  
AGTCGTTGTCCCAGTAAAAAAGGTCTTCGGTAAAGGCGCTGTAATAGAGCACCTTCT  
TGTCGGCCAACGCCGACGACATAAATTCGTCGCCTTCACCTTTGGGTGCAATCAACT  
GCTTGAACGCGCGTGACAGCCGCGTCTTGCCTGTACCGTTGAAGGCGTAGATCAACT  
GCACCTTCTTGTTGGCGTCTTGCAGTTTTTGAGCGACCTCCGCGAGCGTCCTGCCCAT  
GTCAGGCCTCTACTTTTTCTGGCTTGGGGAAGCTCAGCAGTAGATCGCGGTAATACG  
CGTACTGCTTCTGGCGTAGTTCTATTTTCGAGCGGCAAACCTTCGGTGAGGGAGTTGG  
TCAGCGCATCGAATTTGTCGAGGATGGAGACGATGCGGACTTGCTCTTCGAGAGGA  
GGGAAAGGTAGCTTCAATTGCTCGAACGTGCCAAGGTTGATATTGCTTTGAGCACTG  
CTTTTTTCTTTTCCCTTTTCTTCCAGCTTGGTCTTGAATGATTGAAGAAGGTATTCAAC  
GTATCCCGAGCTGGTCTTGTGTTGAGTCAGCCACAAATCCAATGACACTATCAGGAAA  
GCAGGCATCAAATCCCAATATTGATGTTTCAGCAATGTTGGCCGCAATCGTGATGCA  
TAGCGTTCCTTTGGGCCAGAGCTTACTTTGCTTTAGGCCGCGTTTCGCTGTACGTTTGA  
TTGAAGTCCGTGATGACGTGAGACGCGCTTCTGATGTCACCAGTTTGAATAAACGGC  
ACGTGCGCCACCATAACAGGCGCGCATCATTTTCGCGGACGATGTTTTGATTTTCCGCGG  
CCAAAATCAGTCGCCATTTTCGGGCAACGTCTTCCACTCCACGTATCCCTCTTCAAAG  
CTCAGCAACCGATCCCGATAGTAGCTGTATTGCTTCTTGCGCGCGGTGAGCTCGGTG  
GTCAGCTCGGTGGTCAGCTCGGTGAAGATGTCCAGGATGCGGACGATTTTCAGCTTGG  
ATTTCAAGCGATTTTTTAGGGTTGTCGGGGCAGGGAATTGGGATGAAAGTCTTCGCC  
ATATCCGTGGCAGAAACGTCAATCACCTTTGTGCCTTTGGCATACTTTATCTTTGGC  
TTGCAAAATCATCCGTCTGCGTAAAATAGGCAAAGTATTTTCCCAACAGGCAATTC  
CGGGCTTCAAGATAGTCGCGTGGCCACCCGTGACTGCTTGGGATTCACCAAGATAGA  
CCAAAGCCTTTCCACGTCCTCAAGGTTTTCACTTGTATTGGTGATAACTACGTCGCC  
CTTTTCAACTTTTCGAAGCTGCTTTGCTACTTCTGGGGAGACGAAGGATTTGGTCTTT  
GTGGTTGAAAGCCCGTACAGGGTATAAATTTGGCCGTAGTGAATGGCTGGAATTCCC  
GTTTCGGTGAAGTCCTTCTTCTGCAATCCATTTCCCCGAATCAGCTCACCAAGGCTGC  
CCAGAGCCTTCCACTCCACTGCCATCCCGCCTAGCAGCTTCTCCAGAAAGTCCGGAA  
AGCTCATGCTTCCGCCCTCCGCCTTCAATCTCCGCAACGATGGCATCAATGTCCCT  
GCGAAGTTGGTCGATTTCGTCCCGCCGTGGCTCTAAGGTTGGAGTTGAGCTGGGCAAT  
GTTACCCACCTCGCGGTTGTCTTTGGCCTCAACGTAGCTGCCGACCGACAGCTTGTA  
GTCGTTGGCAGCCACCTGATCCAACGTCACCGTCTTGGCGAAGTGCTCGACATTAGC  
CTTGCTGCCGAACACCGCCATGATCTCCTTGATGTGCTCGTCCAGCAGCAGGTTGTT  
GTTGGTGCCCTTCTTGAGCAGGCCGCTGGCGTCGATGAACTGGGTGGCGGTGTCGGT  
CTTATGTTTGGACAGCACCAGAATGTTACGGCGATGGTGGTGCCGTAGAACAGGTT  
GGGCGCCAGCGAGATCACGCTCTCCACGTAGTTGTTGTCTACCAGATACTGACGGAT  
CTTCTGCTCCGCGCCGCCCGGTAGAAAGATGCCGGGGAAGCAGACAATCGCAGCGC  
GGCCTTTGCTGGAGAGGTAGCTCAACGCGTGCAGCACAAAGGCAAAGTCGGCCTTG  
GATTTGGGCGCGAGCACACCTGCAGGAGCAAAGCGGTTCGTCGTTGATCAGCGTGGG  
GTCGTCGCTGCCGATCCACTTCACTGAGTAGGGCGGGTTGGAGACAATGGCGTCA

AGGGCTTGTCGTCACCAAAGTGCGGTTTCGATCAGCGTATTGCCCAGGTGGATGTGGA  
ACTTGTCGTAGTTGATGTTGTGCAAGAACATGTTTCATCCGCGCCAGGTTGTACGTGG  
TGTGGTTGATTTCTGCCCCAAAGAAGCCGTCTTCGATGACGTGGTCCTCAAAGTCTGCT  
TTTTTGCTGCAACAACAGCGAGCCCGAGCCGCAGGCTGGGTCATAGATCTTGTTGA  
TGCTGGTCTGGCCGTGCATCGCCAACTGCGCGATCAGCTTGGACACCTGCTGTGGCG  
TGAAGAACTCGCCGCCTGATTTGCCCGCGTTGGCGGCGTAGTTGGAAATCAGGAACT  
CGTAGGCATCGCCGAACAGGTCGATGTGGCTGGCATAAAAGCCGCCGAAGTCCAGC  
GCCGCCACGCCCTTGAGCACGGCGGCCAGCCGGGTGTTCTTGTCCTTGACGGTGTG  
CCCAGGCGATTGCTGGTGGTGTCAAAGTCCGCAAACAGGCCCTTAATGTCCTGCTCG  
GAGGAGTAACCGCTTGCCGAGGCCTCAATGGCCTTGAAGATGTTTCGCCAGGTCCGT  
GTTTCAGGCGCTCGTTGGTGTGTTGGCCTTGGCCGCCACATTGACGAATAGCTGGCTGGG  
GTAGATGAAGTAGCCCTTGGTTTTGATGGCGTCATCTTTGGCGGCCTCGATGCTCTC  
GTCATCGTCGGCCATCGCAGCGTAGTCCACGCTGGCGTCCCCGCCAGTGATGTAGGC  
GATGAAGTTCTCGCTGATGAAGCGATAGAACAGCGTGCCTAGCACGTATTGCTTGAA  
GTCCCAGCCATCAACGGCGCCTCGGACATCGTTGGCAATCTTCCAGATTTGGTTTTG  
CAGGGCTGCGCGTTGCTGAGCACCGGTCATGACTTGTTTCCCATCGAATCGTTTACTT  
TCCCCTCATCGGCGCCGCCGGCGTCCACCCAACCATCCACATCTGACAGCTGGAATT  
TCCACAGCCGCCCCACGCAGTGCCTGCCAGGCTTTTGCGCTCCTGCCAGCGGTAAA  
CGATGTTCTTCGCCACGCCCAGTAGTTGGGCGAACTGATCAGCGGCTACGCACGGCT  
CAGTGACCACAAAGGTTGCGCTCTAGGGGCATGGGTCAAATTCGATGAGAATCGAT  
GAAATTCTATCAGAGAGGGGGAGGCCTCTGGCTTGTCTGCTACATCGCCATGCACTG  
CTCGATCACTGGTTTTTGACACTCTAGTCGCGCTGGTGCCGACGGTTGGCATGGGTGT  
CCGAACTGCCAACTGAAGTCGGAGGTTCTACGTTGAGTTTTCGTTGACTTCCGGCCG  
AGCCCGTAGCACGATCACCTCACGGAGCCTCGAAACTCCGCTAACAGCGGTACCCA  
CCTCCGACAAACCGGTGGGTTTTTTGTGCCTGCATGTTTTTGAGGCGCAACCGACGC  
GATGCCTGCGTCGGGAGGGCGGTGAATACAACACCCGCAAGGGGAATAAGCCCGCC  
GGCTGTTAGCGGTTTCGAGCCTCCCGACTTCCCGTCCGTCGCCTTGCGGGCGGGCGGG  
CTGATTCCATGGAATGAGGAGCAGGCCATGTCGGACGTTGTACGCGATGCGCAGTC  
ACACCCGGGCTACTACCTGCCAGAAGG

>CONTIG\_49\_length\_8415\_cov\_28.751810

ACCATGCCGAGTACGTTGAACAGCGTCGGCTAATGATGCAGGACTGGGCTGATCGG  
CTGGATCTGTTCGAGCAAAATCAGGTTTCAGATTGCCAGCACGCACCTCACCATCCAC  
CTTCAGGGCGTTCCACGATTGCCGGTCAGAAGGTCACGCCGCTGCCGGCGTTGGGC  
CAACACGCTCCCATCATGCTGGTAGCACCCAATGAGCAAACGATGCCAGCAGTCGG  
CGCGGGGACTCAGCGGCTCTCTGCAGTACAAGTGCCTGAATACGCTCTACCGAAGA  
TCTCCGAGGTCCAGCGAGAGCGATTGGAGGTACTGGACATTTTTGAAGGGCCCGAC  
AACCTGGTCGTCGCGGACTACGCCAAGCTCGCGGGCAAATCGCGGCGGTGGATTAC  
TTACGAGATCCAGGCCCGCAACCTGCTTTCAATTTCAGTTGGGCAACAAGGGGCAGC  
GGGTTCCGGTGTGGCAACTCAACATGTTCAAGCGCCGCTTGGTGCAGGCGGTACTCA

AGCGTCTGCACCGTGGCGTTGATACATGGGATATCTACTACGCCTTGACGCGACCTC  
GCGAGGAACTTGATCGCAAGTCGCCTATTGAGGCGCTCACTTCGGACAATCAGCAA  
GCGATGGTTGAGGCGGTTTGCCGGGCCGTATCTGAAGCAACGACGCCAGTCGTTGA  
GAAGCGAGTCCCCATAAACAGGATTGCAGAATGCATGTCTGAATTTTGAGGCGGGG  
ATGAACGCCGAGCAAGGCGAATGGGGCTTCAAAAGGCATGTCTAAGTGCGAGGCC  
CAAGTTCTCCTCTAATGGGTAGTCAAACCAACAAGCATTACTGTTCCACTTACACTG  
GTGTTCCGTCACTCTCGCAGCATCGTCGAAGTGTGACGCGGTAAGCGCTTATAGGGA  
GACCCACATGAAACCTCGGCTGAAAGTTTTCACTATCATTGGCTTGGCGATCTCCTC  
GCTGGGTGGATGCAACGCGTTCCTAGCCACCGGGAAGATCCCAACAGCTTCCGATC  
ACTTGGCGATACCTCGTGATCTTCCGAACCAACGTCTGTTTGACTGCGCCGAACTCA  
GCATCAGCAAACCTCTCTGCAACCGATAGTTCTTGGAGAGAGGTCACGCATAAGGAC  
ATCAGTAATGGAGTGCTTGAATCCGGAACCTTTGACGATAAGAACCGCACCGGTTTC  
CGCATGCGTATCGAACGTGCGCAAGGGGCGAACCAGGCAGACATAACGCTGAGAG  
GTGGCGGCCCTACTTTATTGACCTAGGGGTGGCACTGGCGATGAACAACCTTAAGA  
GCTTGCTAGACTCGTGCGTCTCTAGCAAGTAGCAATAGCAAAGCATTTCATGGATTGA  
ACAGAGCATGCCGAAGTATACGATTGAAGCAAGATCACTCAATGTTCTTGGTGTAGC  
TGGACACGATTTCTGGGTTTTGCGCGATGAGCAGGGTAAAGCTATGGCCGAGTTGCA  
TGGTCTAGCTACTGATCGAGAGACCGGCAAAGCACTGTTGGTAGGTACCGATGAAA  
CCAAGCATTCGCTGCGTGCGTGGCACTTCCCGCATGATGCAGCCTATGCAGCTTCAG  
AGGGCGTCAAAGTCACGTAAACCAGCTACATTGATGATAGCCAGCAATCAAACACC  
ATTGCCATAGGTGACAAGCCACCCACAGATTAGTCGGCTGTGTATGGACATCTTTTA  
AGTAGCTGAAATTTATAGGTTATTGCCGCTCAGACGGATGTCCATGGTGAGAAAGTA  
ATTGCTTGACGCGTGGAGGACGATTTTAGCGATCTCCCAGTCGGGAACCCGCTTGG  
GATTTGAAATCTTTTGGAGGGTGGAAACCAGTCAGATCGTGATGTTGCCGCGTGAGCT  
TATTGTTAGAGACTTCCCATGGCAACTCAGCGTTCACGGGTCGCTGATGCGCTCGAT  
CTGCTGGAATGGCATCCCTGCCCAGCCTCTGCTATTCTGCGGAATACGTCGGATCA  
CTTCGCGACGCAAGGCAATTAGTGCAATATTATTTGATATCAACTATGTCACCCTT  
CGTGTCAGCACTCGGCTTCTAACAGGCTGCGGATAAATCATCCCTTGAATGGAATCT  
GGTATGGCCACAGGAAAAGACGACAGCAGCTCTTCGTTGATGAAAATGGTGGAGGC  
GCCATCAGCCCGGAAGATGCTCGTGAATTGGTTGACCAATACGAAAGCCGGCGCGG  
AGCTCGGACCCATCGGCAACACCACATGATCCTGGTGCGCCAATTCCTGAGCTGCGG  
GGCTGTCGGCGATTGGAAAATGCTAGTTTAGCTCAATGAGGCTCAATGATAAGTGGC  
CTGAGCTGCATCTTCGTGAATCACTGGTTAACGCCGAAATTGTTTTGTTTGAGGTAT  
TGAATTGAATATCGCGGAAATAGAAGAAAGAGTTAAAGCCCTTGTGAGCAACCTTG  
ATCAGGATGACTTTCTGTACAATCTTTTAGATTGCTATGACAAGCCAAAGGCTTCCA  
TCACTCGTTTAAAAATGAATGGCAGGGGCAGCTATAATCTGTCTAAGAATTCGACG  
AAGTACTATGGAAGAAGCAGGTCTACTACAAGGCGACGAACAGCGATAAGCTTCTA  
AGCATCATTGATGAAATGACGCATGCCGAGGTTGTATCGAAGCACCAACCGCGTTTC  
ATCATCGCCATCAACGCGACCCATCTTCTTGCGATTGACACCAAAACCGAGGACACT  
CTAGATATCCCTCTGGCTGAACTTAACAAGAAGTTCGACTTCTTCCTTCCTTGGGCAG

GATTAGAGAAAAATCAGGCTCGAAGTGAAAATCTCGCAGATATTAAAGCAGCCGAG  
AAAATGGCTAAGCTGTTTCGATCTGCTGCGGGCCAACAATCCTGCCACCACAGCACA  
GGAAATACATTGGCAAAACGTTTTTCTATCTAGGATATTATTCTGTTACTTTGCTGAA  
GATACCGGAATCTTCAAGTCCAAGCTGTTTACCAATCACGTCGCTTCGCACACGGCA  
GAGGACGGTGGCGACTTGAGCGACTACTTGAGTCGCGCATTTGATGTTATGAATCAA  
GAAGGCCGCGAAGGTGTTCCAGAATATCTTGCTGATTTCCCATATGTGAATGGGGGG  
CTGTTTGCCGACAAGCTACCTGTACCAAATTTCAATAGAAAGTCACGAGCCATCCTC  
ATTGATTGTGGCGCCGATTTGAACTGGTCTGAAATTAATCCAGATATTTTTGGCTCA  
ATGATTCAAGCAGTGGTTGATCCGGGCCAGCGAAGCAATATGGGTATGCACTATAC  
CAATGAGTCCAATATCAGGAAAGTGCTTGATCCTCTGTTTCTCAATGAGCTGAACGA  
GGAGTTTGAAAAACACTCTGATAGCAGGGCTAAGCTGGAGCAGCTTCTTTTCCGGTT  
AGAACACCTTAAAATTTTTGACCCCGCTTGCGGCTCGGGCAACTTTTTAATTATTGCG  
TACAAGGAACCTTCGGCAGTTTGAAATGAAGATTTTCAAACGGATTCAGGAGTTGACT  
CCTGAAGGAATACTTCCGTTCTCCCGAATCAAGTTATCCCAATTCTATGGGATTGAG  
CTGGATGACTTCGCCCACGAAATTGCAATCTTGCTTTATGGCTCGCTGAGCATCAG  
ATGAACTTGAAATTCAAGGAAACCTTCGGGCACTGTAACCCCGCACTTCCTTTAAAG  
AGCAGCGGTAATGTCGTCAGTGATAACGCGATACACGTGGACTGGGATGCATTTCTT  
GCCCCCAAAAAGGAGCATGAGACATATATTCTTGAAATCCACCCTACCTTGGCGC  
ACGGAACCAAGAGCCAGAACAGAAGACCGATCTCGAACTCATCTTTGAAGGGCATG  
AAGAATACAAAGATTCCGACTATGTGTGCTGTTGGTTTATCAAGGCGGCACAATTCA  
TTGCAGGCAAAAACGCGAAGTATGCGTTCGTGGCGACAAACTCCATTTGCCAAGGT  
GAACAAGTTTCCTATCTGTGGCCCAGAGTATTTTCAGTCTGGTCTTGAGATTGACTTCG  
CCTACACCTCCTTCAAGTGGTCAAACCTTCGCAAAGAATAATGCTGGTGTGACATGCG  
TTATCGTTGGTGTGAGGAACTCAGCAGACAAGGCGAAGCTGCTGTTTCGGAGCCGAC  
AGCTATAAGATTGTGAAGGAAATCAATCCTTACCTGATTGAAGGGAAGGATATTTAT  
GTTTCGCAGGACTTCCGACATCCTTTCTGGCTTTCCGGCAATGTCCATCGGCTGCATGG  
CCCGTGACGGCGGTAACCTTATACTCAAGCCTAGCGAAAGGGACAGCATAGTTCAG  
CTATATCCCCAGTCTAAGCCTCTTTTCAAAAAGCTGTACGGGACACAGGAGTTCATT  
GGCGGCAACCCACGCCAATGCCTGTGGATCGAGAACGAACAGCTTGAGCTTGCCCG  
TTCGATCCCGCCTATTAAAGCGCGCATTGATGCCTGCTACGACTTCAGGATGAAGTC  
AAAAGCTAAAACGACAAACGGCTACGCTAAGATTGCGCATAAATTTGCACAGCGCG  
TGCAGGGAAAAGGTGGATCGATCATCGTTCCTAAAACCTTCCTCAGAACGTAGGGAA  
TATGTGCCTATTGGCTACATGGATAAAGACAGCGTCATCACTGACGCTGCCTTTGTC  
ATATTCAAACAAGATCCGGCACTCTTCGGAATCATCTCATCAAAGCTGCATGGTCTG  
TGGATTCGCACTGTTGGTGGTCAACTAGAAACGCGACTCCGGTACTCTGTGAAATC  
GTCTACAACACTTTCCCGTTCCCTGACGTCAGCGAGAAGAAGCGGCTAACCGTGGCT  
GAAAAAGCTATGGCTATTGTCGCCATCCGTGAAGATTATCCTGAACTAAGCATCGAG  
GACTTATACGACCCCGATACCATGCCTGCTGATCTGAAGCAGGCGCATTACGAACTG  
GACGTTGTAGTTGAGCAGTGCTACCAGATAAAGCCGTTTTACAGCGACATCGAACGC  
TTGGAATGTCTCTTCAAGCTCTACGAAAAAATGATGGAAGCCGAGAATGCCTAATAT

CGTTGACGTCACCTACGCTCAAACCGGAAAAAGCACCAGCACCAACCAATTTGGCA  
TGCGCGAAATGCAGGAGCGAGCTTTTGAAGCTCGCAATGCACAGCACCTTCTATTAA  
AAGCCCCCCCAGCTTCTGGGAAGTCTCGAGCCCTCATGTTTCATTGCTCTGGACAAGC  
TCATAAACCAAGGACTGTCAAAGGCCATCATTGCTGTGCCTGAGCGCTCCATTGGTG  
GTTCGTTTAAACACCGTAGAGCTCAGCAAGTTTGGCTTTTTCTCCGACTGGACCGTGG  
AACCGAAGAACAACCTCTGCACACCAGGTGGTGACTCGAGCAAGGTCCAAGCTTTC  
GTGGACTTCATGAAGGGTCCAGACAAAATTCTGATCTGCACTCACGCAACTATTTCG  
TTCGCCTTCGAGGCACTGGACGATTCTGATTTTGACAACGTGCTACTCGCCATAGAT  
GAGTTCCACCACGTATCTGCTGATGCTGACAACCGCCTTGGAGAGTTACTGCGGTCC  
GTCATGGCGAAGTCCGACGCCCACATTGTGGCAATGACAGGCTCCTACTTCCGAGGT  
GACAGCGTACCGGTACTGCTGCCCCAAGATGAAGCCCAGTTCACCAAAGTCGTATA  
CAACTACTACGAGCAGCTAAACGGCTATACTTTCCCTCAAGTCGCTGGGTATCGGCTA  
CCACTTCTATCGCGGCAACTACACCAAACGTCCAGACGCCTGCACCCCCAGTGGGAT  
TGAGGGTGTTCTAAATACGGACCAGAAGACCATTCTTACATACCCAGTGTGCAGTC  
GGGTGAGTCCACGAAGGACAAGTACGACGAGGTGGATCGCATCCTAGACTTCATTG  
GCACCGTCACCCATCGTGATCCAGACACCTGTGTTCATTTCATGTCAGGCGGCACGGTG  
ATGGAAAGGTTCTGAAAGTTGCCGATCTGGTGATGACGAACCCAGGGCTCGTGAG  
CGCATAGTAGAATATCTGCGCTGCATTGAGAAGCCAGAGGACATGGATCTCATCATT  
GCCTTGGGCATGGCGAAGGAGGGTTTTGACTGGAAATTCTGCGAACACGCCTTGACC  
GTTGGCTACCGCGGATCGCTAACAGAAATCATCCAAATTATTGGACGTTGCACCCGC  
GATAGCAACAACAAGAGCCATGCACAGTTCACAAATCTCATTGCACAGCCTGACGC  
TGGGGACGATTTGGTGAAGCTATCCGTGAACAACATGCTTAAGGCTATTACCTGTTC  
CTTGCTCATGGAGCAGGTGCTTGCGCCCAACTTCAAGTTCAAGACCAAGAAGGATG  
ACGACGACAAAAGTACCGACACTGAGATCAAGGTTTCGTGGCCTGAAAGAACCCACC  
TCGAAGCGGGTTAAGGACATCATCGAGTCCGATCTGAACGACCTAAAGGCGGCAAT  
ACTTTCTGACGATAAGCTTGTGAAGGCTTTGCCTGGCAATGTTGATCCAGAAGTCAT  
TAACAAGGTGATGATTCCAAAGATCATCAAGATTAAGTATCCCGAGCTAAGCGACG  
ATGAGGTTGAAGAGGTCCGTCAGCACGTGGTGTGGATTCCGTCATAAAGAATGGC  
GAAATTAAGCAGGAAGGTGGAAAGCGCTTTGTCCGCATGGCTGACAAGTTCATCAA  
CATCGACGAACTTCACATTGATCTCATTGATCGGATCAACCCATTTCAGAAGGCGTT  
CGAAATCCTATCCAAGTCGCTTACAACAAAAATCTTCAAGGTCATACAGGACACCAT  
TGAAGCTACTCGTGTGCAGATGAGTGACGAGGAAGCCATCCTGCTTTGGCCAAAGA  
TAAAGGATTTTCGTGAAGACCAACGACAGAGAGCCAAACATTGCTTCGCTTGACCCA  
TTGGAACGACGCATGGCCGATGCTGTGGTTTATCTGAAAGCTCAGCGTCGTCAGCAA  
GGGGTCTGACCGTGGAGAAGGATGCCCTTCAAAAAATCCTGGAAGACGATGACTTG  
GGCCTGCTCAATATAAAGCCCAAGCATGCTTCCATCACAGTGGATGAACGCCTGCTA  
GCTTCGTTCCAGCAGATCAATGACTTCTACCTTCAGAACGGGAAAGAGCCAACATCG  
AATCCTTCGGATATTCTTGAATTTCAATTGTATAACAGGCTAAAGGGGCTTCGCGCC  
AGCAAGGAAAAATGCGAAGCGTTGCACGAAGCAGATGAATACGGACTGCTTACCTA  
CATCGAGCCAGCCAAACCTATTACCTCTGTGGCTGACATTTTCGAGGATGACTCGTT

TGGTCTACTAGACGATGAAGCAGCCAGCATCTTTGAACTCAAGCATGTTCCCTTGTT  
ACCTAAGGACATGCCTAACAAGATCGCCCAGCGCAAACGCTGCCAGGATTTTGATC  
AGTTTGAGCCCTTATTCAACCAGTGCCATGCAGAGCTCGTCGCCGGTGTTTCGCGAAG  
CACGTGGCTTCGCCGGCGAGCAGCAGATCCAGCCAGGTCACCTTCTTCATCCTCCACG  
GCATAACAGCCTATGTGGCTGAGGTCGGTGAGAAAGAAGTGAAGAACGGCAAGGTC  
AACGCACGGCTTCGCTGTATCTTCGAGAACGGCACCGAGTCCAACATGTTGCTTCGT  
TCGCTAGCCACTGAACTGTACAAAGACGAGACGGGCGCTCGCATTCTAGACCCTCAT  
GAGAAGGCCCTGCAGGCTTTGGACCAGGTACAGGAGTGCGATGAAAAGTCAGGCTA  
TCTCTACGTCCTCCGGTCACTCAGCACTGTGCCAGAAATTTTCGGGGATCAAGAATCT  
GTACAAGATTGGTTACTCCACGGTGCCCGTCCCAGAACGCGTCAAGAAGGCAGCCG  
AGGAGCCTACCTACCTAATGGCTCCCGTTAAGGTCATTTCTGTTTTTGAGTGCTACAA  
CCTCAACCCGCAAAAATTTGAGCTACTACTTCATACCTTCTTCGGCAAGGCATGCTT  
GAACGTGGATGTGTATGACAAGCAGGGCAAGCGCTTCTCTCCACGCGAGTGGTTTAT  
CGCTCCTCTGCATATTATTGAGGCCGCAGCCAATATGTTGATTAACGGTGACATTGT  
GAATTATTGGTATAACCCGATGACGTTGGAAATCACGGAGCGGTAAGGGCAATTAA  
CCTGTGGGATGAGATCCTTGCGCGTTGGAACACCGCAGTCAAAGCGATGCCGGAGC  
TAAACGCGCTGGACCTGAACTATCCCGACTATGGTTTCAAGGTCTTTGGTGACACCG  
TCAACAGCAATGCCGCCCTTCGCGACCTTTGGCGAATTGATGAGTTTACCGGTGGAGG  
ATTTCCCTGGCAGTATCGAGCCGGGCCTTGGAACCGTATGCTGTCAGAGGAACGTA  
TAGAGGAACTGCGCTACCGCGAGCA

>CONTIG\_50\_length\_8316\_cov\_5.016119

GCCGATGACCTGCTCGTCAGTAAAACGTTTCTTCACGTCCAATCTCCTCGGGGTAGG  
GAATTGGACTCCAAACTGAGGCGCTACTCAAATTTGGGTGGACGTCGACGCCACCT  
GCTCGCCAGGATCATTGGCTGCCAACCGCCACTCAACGTCCGGAGCGAAATCGAGA  
GGCATCTCGATAGGCTCATCGTCTTTATGGACTCGATTCCAATGGTCAACATCCAGC  
GTCAGCTGAACTGCATCGCCGATCATCTGCTCACGTCGCTGGACGAATGCTTTTTCTT  
GCGATAGGACGGGGAGCCTGGTCAATATCTGCCCACAACACCAACTGGCTGCCGTT  
GCTGTACTCGGTGTATGCCAGATTTGATCGATACGGGCGGCCGGTACCTCGTCATG  
ACGAGTCTCCTCGCGAGCAGCGCTCGAGAACTGCTCAGCGAGCCGATCCAGAGCAC  
TTTTCGGCGTTGGTAGCGGCCACCCCATCTTGGCAGCAAACCTTTGCCACCTCATGCA  
TGTTTACTGACACATCGCCCGTAGATTTCGCGGTACAGGCGGATGATTCTCTGCATTT  
CTTGGCGCTTACGGGCCATGCGTCACCTCCTACTCGGAAATCGGGGCGATGTTGCCC  
CATCCATCAACGATCGCACCTGGCATCACGATCGACCTGACCTTAACCAGGTGATCC  
CGGAAAAGGTTGTACTTGCCAATCCTGCGCTGCAGTTGACCCGCAACTAAGCCTGGA  
TGGACCTTGAGAGTTCGGGCAAATCCGACAATATCGTCCCTGTGGAAAAATGGCGC  
CTTTCTTGCAACGAAGGCATCCATCTTTGCCTTGGGCACTAGGAATTCCGCCGCCGC  
TAGATTGGCAGCTCGCTCTTCTCGGCCACATCGTTGCCAACGCCGCCCGCTGAGCC  
GTCGAGGTGAGCGTCAACAACAGCTTCACCTTTGCCATCACCCCGTAAGACATGTTC  
GAGTTCATGCCGAAGGACGAACCAAAAGTTGTGATGCGATCGAACCTGACGCTCA

TGCCGATCACTGGTGCGGTGTCCGAGAGCCACAGACAGACGCCGTCAATTTTTGCGC  
TCGGCAAGGTCTCAACTATGACAAAGCGAATGCCATGTTTCGGCCAGAACCCGGGGG  
ACCTTACGTGCTTCTTCCGCCGAAGCCAGAAGGCTACTCAAGCGTTCAATTACAGCG  
CGGCCCTTTGCTTCCGAATAGACGGGCGCGACCATTTCACTAGCCAATCGTTTTACA  
CGATACAGCCAAGCCAACTGAGTTGGTGTGCTGAAGCCCCGACCTCAGACCGCTTG  
GCGGCATGTGGGAGAAGTTCAATCTGCTCTGGTGTCTCGACGCCAAAAAACTGCGTC  
AACGCCGCGTTGACGGCTGGACGATCTCGGACTGAGGGGGCATTGAGCCAGCCGCG  
CTTGATCATTGCCGAGAGTGGCAGCTCTCCATAAATCAGCTGACGCTGGGCCGCTC  
TGGGTCCGGCCGCTGCTTTAAGCGTGCAACAGCCAAATCGTAAGAGGCCTGTAGGC  
GGAGAACTCTTCAGCCGGCACTTCAAAGACCTGCTCCAGCGTAAGAGCGAGCATT  
GCGTTTATCGGCTTCTTGTCACCGACCAATCGACTAGCAGTACCCTCATCCACTCCTA  
TGACGCCGGCAAAAGCGCGATTGTTCCAGCCCCGAGTTATGAGAAGCCGCGTCAGG  
AGCTGGCCCCGAGTGGTCGATTCATCGTGATGAAAGAACGATACATGAGTTTGGC  
AAAATGCGCAAACCTTCCGTTTTTACCCAAATTTGACAGATAGGCAGTTCCCTCGAA  
CCGGCGATCTGATCGCAGGCAAGCCATCGAGATCTGACAGGCGTCGTAGTGCCAAG  
CCCGGGCTCACGGTCCAGCTCTCAAGGTTATTGTCAGCTGATCTGGATGCTGCCCCG  
TCTGTCCGCAACCTACTCCTCTGCCCTGCACAGCTCCCAAGCCAAGCGCAGCGTCTC  
GGCGTCGTTCAACGCATGATGCCGACCGGCCCGGAGCACTGGACGGCTCTCGAATA  
GCCACTCGACCTTCCGACCAATCCAAGCATTGTCGATCAGCAGACCTCGGACCTGAG  
GGATTGGACCACATTCTTGCGCTAGCTCATCGGCCATGTCGAAACCCGCCAGTACAT  
AGCGCAGCAGCACCAAGTCGTGGGCATAGTCGGCCATCACCAGCGGCGCTTGGTCG  
GCGGCCAGAAAGGCGCGCAGGCCGGTGGTCATAGCCATCTCCGACATCGAGAAGGA  
GCCGCCCTGCAGCAGCGGGTAAACCACGTGCAGCACAAAATCGGTTGGCGTGGCCG  
GTAGCGGCGCCCCGCTCGGCATAGAAGCGACGTACCCCGTCCTCGCTCACTAGGCCA  
ATGCTGACCAGCTCGGATCCCATGGGGTCTGCCCCTCAGCATCGAGGAAGAATCTC  
ACCAGAAGTCGGCACGGCCGCGTTCAAAGGCTTCGAAGTCGGCGGCCATCTGCTCG  
GCTGGGGGGGGCCTTGCTGTGCTGCAGCTCGAAGCTGATCGGGTACCAGGCCTTCCA  
GTCTTCGAAGGAAATTTGCACCCGCTTTCGGCTTGGTTCCACCCAGACCTCTTCTGGC  
GGGCCATCCAAATCCTGAGCTTTAAGACCAACGACTGCTTGATTGGCCTTCATCACG  
GCGAGGTCTGGATCCTCCACATAGCGCGTGTATACAACAGACCAGACCACTTGCTCA  
CGGTCGTTTCATGCCCCGCAAAGGGCGTGGCCCTTCCGAATTCATGTTCATAACAGCT  
CTTCGCCCCAAAACCTTGGGACCATTCAATTGGCATCAGGAGGACGCCTAACGGGGT  
GGTGCCCTGGCCGGGCTCGAACCGGCACTTGCCGCTTATCTGGCGCTGACGGGATA  
TAAATCCGCTGCTCTACCAATTGAGCTACAGGGGGCGTGATCGATCAGGCGATCACGC  
CGGTATTCGGGCAAAAAGATGATTACAGCAGGGAAAGCGCATAGTCGGAGCGTAGC  
ATATCCATGCGCTACCTATGGCCCCAAGTTTTGGGGCGTGTGATCGTCAGGCAGCGA  
TATCGAGGCGGTCTAGCTGGGCATCAATCTCGCACCAACTCTCCTCATCAATTTGCC  
CCTGCCCTACCAAGGCATGGAACACCCCAAGCAGGTAGTCATAGGCTCGACGGGGC  
TCAATACCCAACGCCCCAGACCGAACGGCATCCAGCGCCATCCCCGCACGCAGATG  
CAGCTTGGTGACGATGACCTCCAGGGCATCGCAGACCTGGATGACCAAGTCGTCGT

GTGCGTCTGGCTGGGTGTAGTCAGTGAGGCGGGTGGTACCCTTTTTCTTGCTCATTCT  
CGTCTCCTTGTTAGACGGCTTGTGCAGGCGGCGCCGGGGCGCAACCCGGCGTCGCCA  
CTGATGCGCCAACGACGCAAAACAGCTTAGACCCCACTCTCCAGTGCTTTGGAAAG  
CGCCAGGTTGATATACGCGGCCCTTGGGATACCGAGCTCGCTAGAACGACGATCGA  
TCTTGGCCAACAATTCTGGCGGCAACGTATGCGTGATCTGCTCACGCTTACCACGCA  
TCACCCCTCGGGCGCGACTGATCAGCAGGTGTAGGGGCATCTTTGCTTGAGGTCTTTT  
TAGGATCCATCGGATAGCCTTTTCATCGGTACTGCATGATCTCTTGCCGGCTGCTCTA  
GCACCACTCAAAAGAGCCAAAAGCGCCTTGGTGGACGCATTGCGTAGTTCCACCCT  
CGCTGTTCCGCAACGGTCTCTATTTCGAGAGATCTGCCTGGCAATCTCGAAGATGTGCG  
ATATCGCTGGCGCCGAAGCGTTGCCCAGCTTCTCAGCCCGCACGCGCATTACGGGC  
CTATCAGCAGGCGGAATGTCCGACAAATCGTAGGGACGTAGAAAAAGCGGGAGCCC  
AACCTCACCTGGCAGGAGGCAAATACCGCTGCAAATGCAAAATCGTGGCCAGTAG  
GATCTTCTTTGCAGATGCTCGGCGTCGCGATGTGGCTGAGTTCATGAAGAACCAGCC  
GGCGCCAGCGGTCCAGGGAGCGCTGCAGAAGCTTGTAGGGATTACGCGTAATTCGA  
CTGGTGTGCGGTACCATCGACCCATGCCGTGCGCTCGGCCCCAGTCCGAACCTGGACCG  
TCGATGATGGATATTTTCGTGTGACCACACCAGCGTGGGCACCGCCTCTTCCAGACCA  
AGACGGCTGAGCTCTTCATTAGAAAAGAAATCCTCGAACTGTGGCACTAGCCTTTCC  
CAGATAGGGATTGCCTCGACCACGTCCTGATCAACAAAAAGCCGCCATCGGCCGTTT  
TCAAGGCTCATGGGCGTAGCCCAATGGCGTGATCATCGATCACGCTTTGCAACCAGT  
GGCAGTTCCACGCCTGGTGTTCGAGCTGGGCATTTAGCGAATCGATTTGACCAGCCA  
AGTCGACCAACTGCGCGGCTCTATTGCCCTCCTCTGCAGTTGCCAACTCCAATGATT  
CAATGCGCCTACGCAATAAATCAATCAACGCTTGTGTGCGTTACCCGCGGGCGCCCCG  
AGGCGGCCAAGCGCTGCTGAAGATCTCTAACCTGTCCCTCCTGCCGGCGGGAATATT  
CCGCCCACCGATCACGATCGCGATTAGCCCGCTGCAATTGCAGCTGTGTGCGGAAAC  
GCTCGTCTTGGACACCGCGCTGGTAGTCAGAGTACGACATAGCCCAAGCCCCGCCTA  
CCTATCGTTGACAACAAAATTACACTTCAAATCATCGTCTTTCAATACTAATTTTATT  
GTTATTTTTTAAATTGAGAGTAAGTTCACATTTGAATCTGACGGTTTGGCAATGAGCC  
TTGCGGCCGTAATTCTTCCGCCTTGGGATTGCTTGGAACCTGATCGCTTTTCATGGCC  
TTGGTCAGAATTGCGTCTCGCGCCTCTAGCCTCATGCTGGCCTCGATCACGGCTTGGT  
CAGGGGAGTACTCCAAGATCGTTTGCACCACTGTGACCTCGCTCAAAACCGCTCCGT  
CACGGCCGGCTTTGGCTGCCTCGCACCATTTGCCCATCGATGCGGGCCCCAACCAACGC  
GGGTGTGGTCGCCTGCCGCCTTGATCGCTTCAAGGGCAACCCGCGCATAGCGTCCGA  
CGGCCGAGGTGGCATTCTTGGCCAGCAGCCGGCCCCAACTCCGCCGCGCGCGCGCG  
GCTTCTGCCGCGAGCTGAGCGGCGCGCTGCAGCCCCTGGGCGTGCTCAACCAACTG  
GGCGAATTGCACCGGCGGAAGATCCCTTACCACCGCGACCAGCGGTGCGAGCTGGG  
CGATTTGATCTGCCTTGGCTTTGGCGGTGGCCTCAGCCTCCAAGCGCTTCTTGCGCTC  
AACCCCGGTGCCGCCGGCAGCCGCAACCGCAGGGGCGTATAGCTTCCGCATACCAG  
CGGTGAGACGCTCGGCGACCTCCTCCGGTGTCTCGACCACCGCCCTTCTCAGGAAAC  
CACCTCCTCGACAACGCGCGGTTCCAGAGCACTCGCCGGGATAGCTTCAAAAGGC  
CGCCCGACAGCCTCCAGGCCGGCGTAGAACTCTCGCACCGTAGTGTGCTTCGCCCTG

CTGCCCTCGACGCCACGGACCAAGCCATGACGCTTACCAACCTGGGCAGCGAAGTC  
GGTCTGCAACTTGGACAGCTTGGTCCGACCGTCCAGATAGTGCGAGGCAGATAGGC  
GAACGCCGGCAGCCTGCTGCTCGATGCGCGTCTCCCGTCGCTTGGTGCCGTCGGGAT  
TGGTGCCGGCGATCACCACGCGATTTCGGGTCTTGGCCTCGATCTCGACCAGCGGCA  
CAACGTAGACCACTAAGTGGGGGGTGAGCTCGTCGCGCTGGATGTTTCGCGGCAACG  
ATGTTGGCCGCGCCGTGCTTTCGCTCAATCCAGTCCATGGCGTCGCGGAAGTACGCT  
TCACTATCCACCATCCCACCGTTCTCTCGAAAGGCTTGATGGTTCGCAGTGATTAGA  
TACTCGACACACCGAACCGGCTTGGCGGCAGTCTTCTCGGTGACCACCGCCAGCCTC  
CGCTCAACCGCTGAACGAAGAGCGGCTGAACTGCTGACCGTACGCAGATCCTGGTT  
GTCAGGTGTGCGGGATGGATCGGCGTTGTGGGTGGGGCGCTCGCGCCAGGTGTGGG  
AGCCGGACGCGCCCACCTGCGCAAACGTGGTCAGCTTCTTAACGCGAATGATGACG  
GGATGACTAGGCACGTTGGAGTCCAGAAGTAAGGCCAGATCAAGGGCGCAGCCCGC  
AGGCGGCCTGTACTACTACGGAGGTTGTACGGGCTACGCCCTACAACCTCCTCGTT  
CGCCCTGCGGGGCGAGGTGATCTCTACGAGATCACCAGAAGCACAAGCATCAACACC  
GGACGAGATCGGCTGGGAGTTGTTGACGACAAAGAAGCAGCCCGCATCAAGTGCCA  
TAGGCGAGCGCAGCTGCAGCTGCAGCCGACACCGCTCTGCGGGCGTGCCAGCTCCTC  
GGGGTCTGCCACCCGCGCAGCCTGTCGTCCAACCTCCACCGCTCTCAGTTGCCGCTC  
GGCCTCCTCCCTTGAACGCCGCTCGCGCTCTCTCGCGACCGCCCTGCCAGCGTCGGG  
AACAAATTGGCCAGCGGCGGCGAGCTCAATGACGCGGAAAAGCCAACTCATTGGCT  
GCTTAGGAGGCGCTTGCCCAGCCATCTTGCCGGCCAGTTCGTCTAGCACCTCCTGCC  
GCACACCATCAAACAAGCCATGCTTTGCAAACCTTGTTTCGTCACTACTACTTTCG  
GCGCTTCGAGCGCGTCCGGCCAGACTAGATGAGGATCGGTAGTAGTAGTACTGGTC  
GTACTAGTGTTTCGTATTAGTGCTCTTTACAGTCTGATCACC GGACGTCGGCTGACCG  
GCTTCCGGTGACCGCACCCCGGCGACCGGAGTGCAATTTTCGTACTTCGGTAGGTTG  
GTGGGTGGAGATTGCGGTGCCGCGAGGCGGTGGCGACCTGCACAGCTGCGGCGAGTC  
ATAGAGCGTGGTGGTTGTAGACCATCGACCTCGCCCGTCCTGCTTTTTCTCTTGCACG  
AGGTATCCCACCTCCCGCAGCTCTCTCAGCGCCCCCAAATCTTGTATCGCCCCTCA  
CTCGGGGAATCGGCAGCCAGATCGTCCGCGTCATCCTGTACCCATCGACATTGGTC  
AGCAGTCGTATTGCCACTCCTCTAGCGAGGATCGACAAGCGTTTATCTCTGATGAGA  
TGGCTGGGCACTACCTCGAATCGTTCGTGACGCACGGCTCGTGTGATGATCATGCTC  
TGCACGCTCCCTCGGCCACTTTGCGCTGGGCATCGCGCCGGGCTTGCGTAGCTCGTG  
CAGTAGCTCCCAGTGGCCGCCCCGGGACGGCGGGGCGGCTGCTCCGCAGCGGGTGCA  
CGCCTGCCGCTGGCAAGCCATGCCAGGACATCACTCAGCCACCAGCACCAGTTTTTG  
CTGCCCGGGCGCTTGAAGGCTCCCGGAGGCGCGAGATGGCGCCACTTTGGCTGACA  
CAAGTACAGCCGAATTGACTGGCTACTTAGGCCGGTCACGATGCTCAACTCTTTGAC  
GCCAATGGCCCGCGGAAGCTCTTCAGCGACAGCTTCATCCAAGACACTAGCAGGCG  
ATATTCGTTCTTGTTTCACGCGCGAACTCCGACTATTGCCGCATTTGCATGCAGCAGT  
CGAATGAGTCCGCGACAGCCATGGCTTGCTTAACCCGCTGGATAGGCTGGCGGGCG  
ATCCTGGGTGTATAACAACGACCACCTCGCTGGTCGTTTGAGCCGATGGCGGGGTTGT  
GCCCCGTTCTAGCCTGCTCTCCCCCGGGCGTCGCACTTTGATTCCCGACCTCACTCAG

GTTCGGGCGCTAGCCTTTCGCTCGGTATTTGCCGAGTCTAGTCGGGCGATTGCCGCA  
TGCCACACGGCATCCTTTCATACCCGCGAAGTGGGTCGCTTACTCATCGCGAGCTGC  
TGGGCTCGTTCTGCCGACGAACATCAGAGAAGGCGCCTGCCAAGCTACCCCTCCCG  
ATACAACGATCGACACCAGTACTACCAGCGCATTGCTGAGGATTGTTGATCTCGTTG  
AATCACGCTGTCAAGCCGAGCTTATGAGCGCGCAGCCTTGGGACAAATTCGGGACA  
GCGAGCTCTTAAAAGCAGTTCAACACGCTTGTATTTCATCGCCGTTGAATGATTTTCTT  
GGAGACACAAAAAAACCCGGGAAATCCGCGCTTTTCAAGGCTTTACATCGTGACCA  
ACCCCTCAGGAGTTGGTGGGCGGTACAGGGTTCGAACCTGTGACCCCTACCATGTCA  
AGGTACGTAAAAACATTGTTATTTCAACAGTTTGTGA

>CONTIG\_51\_length\_8221\_cov\_17.754880

GACCAAGCGTTGCACGAGAATTGACCGGCGCACTGCATGCCCTCGACCGGCTGGAG  
TCTGGCCAAAAGGAGACCTTCGGGGAGTCTAGAAAATTAGGGGCATTTAGTCGCGG  
CCAATAATCCTATACAGCCTACTGACTGAACCGGCTGGACGCATCAGTGCCCAGA  
AAGAACCTCTTACCCATATAACCACTTTGCTATCATCGCAAGCAAAGCACAGAGGG  
GCACGATCAATGACACCAGAGAAGTTCATAGCCACTTGGAAGAACAACAGCCTCAC  
AGAGCGAGGCGGCGCACAGCCCCATTTTGATGATTTGTGCGAACTGCTCGGCGTAG  
ATAAGCCGCGCGATCTCGACAATTACTGCTTCGAGCGCGGTGCCAAGAAGTCCGGA  
GGTGGGGATGGCTGGGCTGATGTGTGGAAGCGCGGCCACTTCGCTTGGGAGAACAA  
GAAACCAGGCCGCGATCTCGACAAGGCGCTGAAGCAACTCACGGACTACTCCCTGC  
AACTCGAAAGCCCGCCACTCTTGGTGGTGTGCGACCGTGAGCGCATCATCATCCACA  
CAGCCTTCACTGGCTACCCGGACGAGCCGCGCGAAATCCGCATAGAAGATCTGGTG  
GATAACGGCAAGCGGCAAATTCTCAAATGGGTGTTACCGACCCGCTGAAGCTGCG  
GCCCCGAAAAGTCCACCGCCGCGCTACCGAAGAAGCCGCTCAGCGTTATGCCGAGC  
TAGCCGAAACCATGCGTCAACGCGGGCAAGACAGCAATCAAGTGCGCGCACTTTTTG  
GTCCAGTGCTTGTTCTGCATGTTTCGCCGAAGACGAAGGACTGTTACCTGATAAGATT  
TTTACCAACCTGCTCGCCGCCGCAAGAGCGACGTGGCGAAAGCCGCCAACCGTAT  
CGGGAAGCTATTCAAGGCCATGCAGGAGCCAAGAGGTGAGTACGGCAACGACGAC  
ATCCAATGGTTCAACGGCGGCCTATTCAAGCAGATTGCCGTTCTACGCTGACCGTT  
AGCGACCTCGAAACGCTACGCGCCGCCTCCGCCGACATGGACTGGCGCGCGATTGA  
CCCCACTATCTTCGGCACGCTGTTTCGAGCGGGGCTTAGGTAGCAAACGCGCCGCGCT  
TGGCGCGCACTACACCGACACTGGCACGATAGCGAAGCTGGTTGAGCCGCTGGTGA  
GCGGTCCGTTGCTGCTTGAGTGGCAGGCCGTGCGCGAAAAGATCGCCAAGGTGCGG  
CCGAAGTTTGGCATGGTCAAAACGCGGGGCAACAAATTCCGCGCCAACGACGCATT  
GCAACAGGGCCAAGCACTTTATCAAGGCTTTCTGCTGCGCCTCGCCGACTTTTCGCGT  
GCTTGACCCTGCATGCGGCAGCGGCAACTTTCTATACCTGGCGCTCAAGGCACTGCG  
CGACGTGGAAAAGTACGCGCAAATCGACGCGCAGGAACTGGGCCTGCAAGCCGAG  
GTCAGCTTGCAAACCTGGCCCGCACAAACATCCTGGGTCTGGAAATAAACGAATTGCG  
GGCGGAACCTGCACGGGTACGGTGTGGATTGGCGACATTCAATGGTGTGCGGAGA  
ATGTATGGCCGCACAGCCTGAACCCGATTCTTAAGCCGCTGGACGGCATCGAGAAC

CGCGATGCCTTGATCAACACAGATGGCAGCCAAGCCCAATGGCCGAAGGCTGATGT  
GATAGTTGGTAACCCACCGTTCATAGGCAACAAGAGGATGCTCGGTGAGCTGGGCA  
AAGCCTATGTAGACCAGGTGCGCTTGGCATATAAAGACAACAACCTTGGATGGTGTG  
GACCTCGTTTGGCTTTTGGTTTGAGAAAGCGCGGTTGCAGATGGAAGTAGGCACTCTG  
CAATCAGCCGGCTTGGTTTCGACCAATTCCATTTCGTGATGGCGCGAACCGTAAGGTA  
CTCACTCGCATCTTGGAAAAGTCGCGCATTTTTCTCGCATGGAGCGACGAAAAGTGG  
TGGGACAACGGCGCTGCTGTGGGGGTTTCATGACGGGCTTCGGACAAAGTCCCTTG  
AAGCCGCATCTGGATGGTGTGAAGTCGCGGTCATTCATGCAGACCTCACCGCAGG  
GATTGATGTTACGAAAGCATATAAGTTGCGCGATAACCTGAATGCATCATTTTCAGGG  
CGTGACGCCATCGGCTTCAGTAAAAAGGACGCTGCGAGAGAAACTTGAGCTGCCCCG  
CCGCCAGCTTCAATTTGGAAGGGGACGAAGCCAGAAAAATACTAGTAGAGCCAGCC  
ACGATGAATGGGGAGCCCATGGCCGCTGTCGTTGCCCCCTATCTGGGTGCGGATGAC  
ATTACTTCGCGCCCCGCTTGACAGGTTACCATCAACTTTGTGGGCCGCGACGAGAAG  
GCGGCCGTGATGTTGACAAGCCGTTTGCTGCCATCTCGAATGTGCGCTTGCATCGG  
CTGCACACGAACCGCTTCAACGATTTTCAGAAGTATCCGTGGTGGCAGTTCGGATGG  
CCTCGACCAGAAATGTTGCGGGCGCTGAAAGGACTTTCGCGCTACATCTCGATTCCG  
CGCCACGCCAAGCACTACCTCTGCGTGTGGACGCGCCCTACCGTCACCCCCGGCGAC  
GCACTTGTCGTTGTGCTCGCTCGTGATGACGACACTACCATTGGAATCCTTCAATCCCGC  
ATTCATGAAGTTTGGGCACTGCGCTCAGGTTCTCGCTGGAAGACCGACCCCGCTAC  
ACCCATACTACTTGCTTTGAGACCTTCCCATTTCGCGACGGTTTGACGCCCAACATCC  
CTGCAGCGGAATACGCAGCCGACCAAAACGCGAAGGCGATCGCAATAGCAGCGCA  
AGAAGTATTCAAGATGCGCGACCATACCTCAATCCGCCCCGAGTGGACCGATTGGAT  
AATCACTCCCGAAGAGCAAGCAGCCGGGTTCCCCAAGCGCCCAGTTGCCAAGCCTG  
GCAATGCAGCCGATCTGAAAAAGCGCACCCCTTACCAACCTCTACAACGCGCGCCCA  
GCGTGTTGGTCTTGGCGCACGAAACTTTGGACAGGGCTGTGGCCGCTGCATACGGC  
TGGAGTGACTACACCCCCGCAATGGAAGACGTCGAAATTCTTCGCAGGCTACTGGA  
ATTGAATTTGCGCGGATACGCAGCATAGGAGATTGTCGGCAAGGTCTCACGTGATCG  
CGCAAATCAAACATTGGTGGAAAGGGCGAAAGAGTTGAGATTTGCAGCCGTGCATCG  
GGTTGGCAGGGCCATTTAGATGTGTGTGGAGGGGTAGGTAGACGCGATTGATTGAC  
TGCTCATAACCAACTTCTGCCGGTACTAACCGGCAGGTCTTGGCCGATTTCTGCCG  
GTCAGGGTCGGCCAGCGGACTGGTCAAATCCGATGCAAACGACTGGTCAAGTCGAA  
TGCAAATGGGTGGTCAAATCCATGCAATTACTCACAATGCACGCCCAGCGTGGTTAG  
ACAACGCTCACAAGTCGCTCTATAAGGCAGTTGCAGATGCTTACGGTTGGAAGGATT  
ACACGCCAGAACTTCGGAAGACGAAATTCTTACACGCCTTTTGGAGTTGAATGAGC  
TCCGCTTCAAATAGCGTGCTTGGTATTTCCCTGTAAGCCTCTCCAATGGAGAGACCA  
TGATAAAACCTAGCTTGCCAGCTAGGTTTTATAACTTCTGAGGTTATGCTGGAGCCA  
GTTGATGCCACCTCACTGTGAACGTAATCCAAGGATGCCTCACAGGATTTTCGACCTC  
GCTCTCCTGAAGCCAGCCAGCAGCAACTACGTTTCGCTTGGCCAGTGTGGGCTGGGG  
TGTGTATACGACAATCGCCAGGTTTTTTTCAGCACGACTACACGTCACGTAAAGTAG  
CCTACGAGTACGTGCTAGTGCGTTGTCCTTGCCGTCACGCTCGTTGTCCCGATCAGTC

TTTGTTGGTTCTTTTACACCCAGCAATTTGTCGTAGCTGAATAAGAAGCCGCCTGCCT  
CCTCATCATTGATGACAACCATGACCCTTGAAACTCTAGTCCCTTTACACCTTGATG  
TGTGCCGTAGGGTGAAAGGCCATCCGCATAACTCGCAAAGGCTGCCAGCTCCGAAA  
ATGGACGCTCCAGAAATTGCTGGTAGGCGTAGTTGGTCATCGCGTTCGTATCTTCAG  
GATCTGGAGCCTCACCAGGGGCTCCCAACACCATTGCCCCAACAGATTTTCAGGGA  
CATCAAGCAGTTGGGTTTGCTGCAGAAGCGTTGCGACCTCGCTCAGTGTTGGATTGC  
TTCTTTGAAAAGAGAGAGCAGAGCTTGTGTGCGTCCCTCTACGCGCTGTATGTGGG  
CCGATTGATCGCCTGTTAATTGCATAACATCCTTGCTCAGCAAGGGAGAACGAGAGC  
GTACGGCTTCAAGCAGGAGGAAGTGATCATCCTTAGCGTTAAGGATGGGAAGAACG  
CCTTCGCTGAAAACGCGCAGTGCGGGCAGGGTTCCATCTAGCAAGCCTGTTTGAAGG  
TGCTCAACCGCGTATAGGGGGGTGAACAGCTTCTCGAAACCCATCCGCCGTGCAGC  
CATCTTATGTTGAGGATCAAGGTCTTTCGGCCTTCAGGGCCGGTAGCCCATCCGCT  
GTCATCGGTGATTAAAGCCATCGAATGAGCGATGCTTTCCTCCAGATTTGGAGCCCG  
TTCTTGGCTTTGACTAATGCAATACATGCGCACTACACCTTCAATGGCATCAGGCTTT  
GGGGTCTGCTGATGAGTGTCTGCAGTGCTTCGAATCACATTGATAAGGTCTACCACC  
CTACGAGGGCAGCGGCGATTAACGACCTTTTCAGGTTTCAGCCAGTCACCCGGTATC  
GCTTTATCAAGGCGCGTAACTCCATGGCCGTAAATCTGTTGCATGGTGTGCCCCAGT  
AGTCCCAGGCAGAAACGTGTCTGCGTCGATTGCTGGACTTTCAGAAAAGCCTCCATT  
ACTGGAGCGTGGGTGTCTTGGCTTTCATCGATCAATACAACCTGGGTAGCGGTCCACT  
AGAACATCCAGCAAAGGGCGTTCAGGAGCGAATGCTGCAGTTAACTTGATGACCTC  
ATCGTGATTGAGCGCTTGCCGCTCTCGGTTGTGCGCTGTGGGGCTGTAGATGAACTT  
CGTAATCTCGTCGAGAGTTTCAAGTCTGCGTGTTTTGCTTTGTAGCTTCCGTCTGTTT  
GCTCGAGAGGTTTTATTGTGCGCTTTCGAGCGTGCTAGCTCGCCCTCGATCTTCTCAA  
TGTCTTGGGCAAGTTTGATCCTTAGCCACTCTCTGATCTCGTTGTGCAATCCTTGGAT  
TAGGCGCCATGCGAACGCGTGAATAGTCGAGACTTCCACTAGTGGATCAAACCTCTA  
GCCTCCGAAGAATCTCGTCGCAGGCTGCGTTTGTGTAGGTGATCACCGCAATGCGCC  
GGCCCTCGAACGTCAGGCGTTCTCGCTCGCGACTTTTGAGTTCGCGGATAGCCTCGA  
CGAGTGAGTGAGTTTTCTTGAGCCAGCACCTGCGTAAAGAAAAAACTCTTCGGGT  
CTGCCAGATTCAGGCAAGCCTGCATAATGGTGTCGGCATCTGCGATAGCTGCCTCGC  
TCATGGCGTCACCTCCACACCCTCGGGTGGAATTACCAGCAGCTCTTTTTGCTTGCTT  
CGCAATTTGGACTIONAAGCCAGTTGAGGCCTTCACAGATGTATTCAGGGATTTGAGG  
CTGGGAAAGTTTTTGTGCGCCAAAACGAGCAACACAACTCTGCTTTCTTTCCCTTCG  
CGTAATTCGTTGAAAAACCCTTGTCGACGGCTTCCAATGTTTGCGCTTCATTCAA  
ACTTTTACGAAAGCCTTCATCAGACCAGTACCGTTTGTCTTTTCCGCAAAGTGACCA  
GCGTTGCTAAGCACAAAGCTGTCTTCAAAGGTATTTGGAAGAGCTTGTATTGCTTCA  
CCAGTAGCGGGCAGGTGGGTGGAAATAGGAGTTTGATAGGCGATGCGTACTGAGTA  
CAGGTCGTCGATTTGGTGCTCTTTTTGGTTCGCTGGCAACTCAAGCAGCTCATCCACT  
GTGCTGCCCAGATGCATCAGTTTCATCCAGCTCCGCAATGTCGGATTGTTGTAATCT  
GATCTGCGTTTCTTTGCACCGGTTTTGCAGCTTTATTAAGCCCTGCATCAAGGTCTGT  
AATAACCAGGGTGAGGATGCCAAGGGCGTCAATTAAAGGCCTTAGTCGGTGTGCGT

GACTACCACCGATATCGAGAGTTGTGATATAGCAGCGGTCAAGGAATGGAAACTTA  
TTTCGCAAAAAATGCGGCAGCATCATTCGCTCCGCTGAACCCTCTACCAAGATGACG  
GCGTCGGCGAAGAATATGTCCGCGTGCTGTGCCCCGAGATACCTGGTTACGAACTCC  
TTCGTCTTTGTTCCCTCGCCGAACACGTTAGAGAGATTAGAGACCGTCGACACCGGT  
ACACCGATGCCATACATCCCAGCTGGGAGTCGCCTGAAATACCTAAGGTCTGTGTAC  
TCCACTTCATGTGTTACATGGCTGGAGTGCGTGCTCACCAAAAGCTGAGTCTTCAGA  
TTTGGGTAGCGTTCAAGCAAAGCGTCTCGGCATAGAACTTGGTAGGGCGTGCCGCACG  
AACACTTGTTGCACTTGAACATGAAGGTGGGCTTCAGGCTCTTCAATGAGCACGAGG  
TGGATGGGCTCGACGCGGTCTATTACTTCAGTGCTGGCGGCCCTGGTTTTTCTCAGCC  
ACTCGTCCCTGAAGCCCATCAGCCGGAATCATAGATATCAGGTTTTGATATCCCA  
ACCCGTTAGCGGTCTCTGGTAAGTGAAGAGGAGGGGCTCCTGGGGCGCCTTGATT  
GAATCCAACCTCAAAAAGGACGGCCGCTTCATGATTCATGCCGTCAGTTGTTGCCAGG  
CGACTTGCGACTTTGATGCGTGGGTTCATTGCGGCCGGGGTAGCCCAATCCCTCGACC  
TCTCTAATAGCAGGTTTCAAGCTGCTACCTAGCTTCGTATCGAATGCCGACTGGGCT  
GCTTCTATCGCCCGCAACGCTTCGAGATCTGAAATATCTGGGCTGTCACCTGGATCA  
AGGTGTCGGGAGTAATAAGATCTGAGTTGTTCCGAGAGTTTTTCGAGCGCCGCTGGGT  
CTAGTGCTATCGCCTTGATTGTCGTCCGAATGGTCGCCGAATCCCCGCTGTGCATTG  
ATTTTCATGTACTCGAATTAATCCACTGAGAGGATTGCTTTCCAAGGGCAGGGCAGTA  
GGGCTCAATTGCTGCATTTGCGCCATTTCGAGTCGACTTGTGAGGCTTCTTAAGTTGTT  
GTGGATCTAGGCGGTACCAACGAATCTTGAATTTATCTCCCAGCCGACGGTTCAAAT  
AATCATGAAGGCTCTGCGGCCATAGTGTGAGCGGGCTACCAGGCGGGTCTTCCTTCC  
CTAGAGCGTCCTCAAGCTCTGCAACCCTCGCGCGTTTCCTTGCGATAGTCCGTGTACA  
GCTTACTCATATCATCTGGCTCAAGCAGGAAACGCATTCCCACAAGGCCCGCGCC  
ACTTAAAGCTAGGTATGAGATCGCGGATGAAGTGGAACCTCTCCTTGATCTGCCGACA  
CCCAGATATCCAAGCTAGGGAGCCAGTCGGGCCAGTCCTTGGCAGTAGGAATTTCA  
AAGTTTGCTGGTGGGTTCTCCCACTCTTTACCAATCTCGTCCAGCTTGGTGAGATGAC  
AAAGAGTCAGATCCTGGAGCCGAAAAGCAGAAGCCTTAGAAACCAAGAATCTCCGG  
AGTGCCAGCATGGCGGAGGATTTGCCGCTGTTGTTTGCACCTACAAGCAGCGTGCTC  
TCATTGGCGAAGTCAATTCGCACAGAAAGCAGTTTTTCGGAAGTTAGATATCTCTACG  
TGTTGGATGCGCATGGGTCGTCCTTGAAAGCCTGAGAAGTATCAATTTGCCGTCAAT  
GTAGCTAGCTGCTTACAACAATCAAAGAGAGAACGACGGAGACAGATTTATTTTTGT  
AGCTCTAAACGACTGCTATTGGCCGATTCTGTTGAAAAAGTCGGACGCGGCTCTCAG  
GGCAGAAAAGTAAGCGCATGAGATTGAAATCTTAAATAGCCGCACAGTCATTCGGA  
CACAGATTTACGTAGCCGTGCGAAAAACCGGCTCCTTCACCGCTCAGCTGCCGGGC  
ATTTTCGAGAGAACCGACTTTTTCAACAGAATCGGCCGATTTCTGCCGGTCAGGGTCG  
GCCCCGCGGACTGGTCAAATCCGATGCAAACGACTGGTCAAGTCCATGCA

>CONTIG\_52\_length\_8053\_cov\_322.843805

GTGTGGGGCCTGTCATTAAGTGCCTGAAATCAAATGGTGTCAAATGCCCTTC  
GCGCTCACTATATTTCTGGCGATCACACCATTTCCCGCTTCATCAGCAGGCGCATTC

GCGTCGCCTAAGTATCCCCTGAGCTGAAATTTCTGCATGTTAATACCTACATCTCTGC  
GATACGGCATTGATAACCGAAAGGGCGCGAAGACTCCAGGCCTGCACCTTGACTCC  
TCCATGCATCGGTAGCACACTTCTTCACGGAGCGTAGCAACTCCGCAAACAGCGGC  
ACCACCCCCGTCAAGCGGTGGTTTTTTGTGCCTGATGTTTCGGGCACATGCTCGGCGT  
CTCCACGCCGGGAGGGCGGCGAATACAACACCCGCAAGGGAAATAAGCCCCGCCGT  
TGTTTGCGGTTGCTAACCTCCCGGCATCCCGCCGCATCGTGCGGGCGGGAGCCTGTTC  
CGGAGGAGTGAGCATGGAGCAGTCTCTGTTTCGGGTATTACCTGCTGCCGAAAACG  
CGCAGCTTCGGTTGCTGCAAACGCGCGATTATTTACGCTTTCTGGCCGCATTGGCAC  
GTCCCTGTTGCATGTCGAACACCTCAGGCATCAATGAGCCTCTCGTACCGATCGATG  
CTTTGGCTTTTTTGCTTCGATCTGTTAGCTGAGCAATTGGATGATGTGCTGATGCAGAC  
CAAGGTGCCTGACGACATGACAGAGCGACGTGCTTCGTCATAGCATGCACATGACTT  
GAATCAACATGGGCAATCGCTGTAGTCCCGATCTCGGCTACCTGTTGCTGCTTTTAC  
AAGCTATAAGCAATTTGACAGAGAAAAGCACCAAGCCACTGAACATCGTCAGGCAA  
CAGAATTTTTCAGCGATGCACTTGGCAAATGAAGGGAGCATGCGAAATGAAATTCA  
AAGCAAATCTAGCGGTAGTCGCAGTGCTCATCTGCTTGGCAACTTCTTGTGCAACTG  
CCAAACCGACGGCTGAAGAACCTCGAGGAACAAAGATGACAACACACACTGAGCT  
GACACCCCAAGTCCTGATGGATCGCTTCTTATCCTTGATAAGAGATGTCGAAAATTT  
CGACGAGCTGTCGCCATTAATTCTTGAAAGGTATCTAGAAGTTCCCTTCACCAGGAA  
TGCAGGTGAAAACCTCTGGGTTCTATGTGCTCGATCAATCCTCTCCTTATTCAAATAT  
ACCACCACTTACAAATTCGACGAGAAATTTTCGGAGTATTCTGAATGTCACTCTGGAA  
CTTTTACCGCCGAGCAGTATTCTCCTTCAACCCTTCCTCCTTGCGAGCTAGTCTTTG  
AGAAATACGACAAGGCCTTGAAAGACGCTGGATTCAAAACTGAAATAGGATACTGG  
TCTTATAATGAGTTTTGGGTGGGTCTGTCTTTCAATACTTACGTAAGAATATACGTG  
CCCAGATCAATCCATGGCACCCCTGTCTCCGTAGACCCCCAAAGAAAATCAAGAGAA  
AACTGTGTCAAGTCGATAAGTCTGCACAAGTTTGAGGAGTAACGATAATGGCAAAC  
GCCAACACTCAATTGCAGTCCATATTGGCGCAGTTTCGCGGGTCGGTCAGATGTCACC  
CCCGATCAAGAAGCGCAGTTACGCGCGACGATTGCGTCCGATCCGGACCTTACACA  
GAGACTCAATCAAGAAGCAGCCAGCGGCCATCTAAAAGGATTCTTGCCAGGCGTTG  
GCGGCTCCGAACCGCTGACGGGCTCCTACGACAAGGCATCCGGAATCGTCACCCTC  
CCGGCGCTTGATCCAGGATCCACACCGACGGCGAGCTTGCGCGGTTTCGCTCCGGCTG  
CAAGAGATGGGTATGCGTTTCGCAAATAGTTCGTATATGGATGCAAACCAAAAAAG  
CCAGCCTGTAACGCAAGATATGGTCACCAACCTGCAGGCGACAATCAACAGTTTCGC  
CGACGCTGGCGAACGAGATGAAGCGAGCTGTTACGACCATTGACAGTAGCGACCCC  
CAAAAACGCATGCTGCTGGAAAATTTTCGCTCCTCTCAGCGGCACGATTGCAGGTGGG  
ACGTTCAACCCAACCAGTAAAACCATGAGCATTCCACCAGCTACGGTCGGGCAAAC  
CCAGAGTCAATTCAATAAATTCACGCTACTGATCTAACATTTGTTCTTGGTTCATGA  
GACGCAGCATGCCTTCAATCAAGTAAGCATGGCCAACTCATACAAACAATTTGATTG  
CGCAGTGAAAGCGATTGCAGCAGATAATAATCCGGTCAACGATTACACACCCCCCG  
TGGAGAATCTAGTTAAAAGTGCGCGCGACGATGAGGCCAAAGCTCAGATTTAGGT  
TGGAACGCATTGATTGATCGGGAGCGGCAAATCAATCCAGCCGTCGATTTGAATGC

AATGAGACGTCTCGGAAACGGCCGTTTGGATGACTTTGTTGAGGCCAATCCGAGCA  
ACAGGGCGCAGACACAAGCGCGGCCAGGGATTACGTTCAATCAGGACGGCTCACTG  
CCCATGACGCCTCAGAATGTATCTGCACAAGCGACTTTCTACTTCGACAAACAGCCC  
AGAGGCACGCCAGGACTTCCGCAAAATCAGACAACAGGCATTGGATTCCACGGTGA  
CTCGGACTACCCCAACTACTATGGGGCCGGCGCTGTCAGTCGAGCGATTGCATTTGA  
CAGGGCCTATGCGCATCCGGTGGGTGGGGTCGCCCCGCAAATGCAGCTTGATATGC  
AACGCCTGCGCTTCAAAGAAGAGCTTTTAGAACATAACGGAATCACGCTGCCCCCA  
GGCACCACCGCCACACCGCAGGTCTATTGGGACACCGGCAGCAATCCGCCAACCCG  
CGGGCTGTTGCAACACACAAAAGGATCGCACCAGCACATCAGCCCGACTCCCGACA  
TCGATCCTCAACAGCCAGCACTCAACGTACCCGGCAAGACAGTGCAACCAGACAAT  
GAGCTGCTGGATAAAATTCGCGGTGGCGTTCGCGGCCTTGACCAGCAAGCGGGGAA  
ATCTTGGGATGAGAATAGCGATCGACTAAGCGCAAGTTTGATGCTCATGGCAGCAG  
AAAAGGGCTTTACAGCAAAAGACGATTTGAAGTTTGCGTTCAACTCACCGACCGAT  
AAGATGGCGGGTGGTGAAGTCCTGCACATGTGGCGAGAAGGCCACCAGTCCCCCGA  
TCCGGCTGCACATCGAGCGCATATGACTACACAGGAAGCGCTTTCTATTCTGCGGA  
TCAGCGCTTCGCGCAAGTGGAGGTGATGCAGCAAGCAAAAAGCGCAGGAAGCCACA  
ATCACTCAACAGCAAGAGGCCGTACAAGCACAGTCAACACAAGCACGCTCGATGTA  
AGAAGATATTTATAGCTCGCTGCTTGCCAGGACCTTATTAACACGCACTTTCAGCGC  
AGTCGTAGCGGATGAAAGTGCATGATTCGAGGGCGCATCCACGCTATGTGAATGAG  
ACTTTGAATTGCGCAAATACCGCATCTGATCTGATGGCGTCACGCACTTGCTCCCGC  
GTTCTCCCATCGCCTAAGAACCCGTCAAGCTGATCCGACACTTGATTAATATGCTGA  
ACAAATTGATCCTCGTCGAGCAATATTTTATATGCCCCCTCAAGGACTTTGCGCTGG  
TCTTTTTTGTCTGCCGATATAATGTTTGGTGTAGTCCAGAGTTTTCTAACTAGTGAGA  
AAAGGCAGTAGTACTTATAAATCGCCTTTGCTCTATCGACCTTCGAAGTTCTTATAA  
GATAGCCAAACCTGTAAGACGCGTATGCGGCCAGGTGATAGAGTTCTACGCTATGA  
GATGGCTGGAATATCTTGTGAGCAAAATTCATTCTTATTCTCGATGATCACGTGCA  
GCTCTGTTGGGCTGGAAAAAAAACATCGCCGCTGCAGCTTTCATTAAGTCGGAGGGT  
TTCATTATTCTAGCTCTTTCGATCGAAACATTTGATACTGATTTTCTCGCCGCTCTAT  
GAATATTCTCTCATCACCATCTTTGGACTGACAGTATTCTTCAAGGTCTTTCATAAAC  
GGCAATAATGCCCAAAACTGATCCGCCCTAACTTCGTTCTGCTTGTTAGTTCCTATAA  
TTATGCTAGAAATGAACTCGGCGTTTTTGTCTCCGATCAATCGAAGTGGAACATAGA  
TAAGAGAAGCATAGCCGGCATTTCGCCGAGAATATTAGTTGTCTGGCACCCATTTA  
CAATTTGATAATCTTCTATAGAAAATACGTCACCTTTCCTATTTATGCTTTTTTGCTAC  
GACCGTGACGCCATTATTCTTAAAAACAAATGATGAGCACCCGTCATTTAACAGGTC  
ATTTGCAATTGACTTATTTATCTCAGAATCCGGATTAAAGTCTCTCACATTATCATAG  
AAAACGGCGCGATTAATTGAACTTTTTCTTCCGGATCTTTAGCAGTGAGAACAAATT  
TCGAGAAGCTGGTCCGCTTGATGTAACCAACGTAAGCCTCGTCAACCTTTTCATGC  
GCAGGAAGTGTCAATGCTTTTGGAAAGTTCAACGCAGCAGAATTTGAGTTGGTAGCT  
GATCGGTATCCAGACTGAATCTGCTTGCCCCCACGCATATTATTTCCACGTCATCA  
AATATACTTAACCTCAAGCCTTTTCTTACCAGCAGAAATTAGACTTTCTATCGCCC

CGGAGGGCATGTCGGATCCTGTCGTGCAGAAAAACATTTTAAACGAGGGTTGCTTT  
TGGTAGAAGAAGAATAAACAAGATCTTTTTCGCTTATCAGATCAATTATTTGACCGC  
TATGGAGCAGAGCATTCTTTGTAAAGAAATCATAGACACCGTCTATGAATTTAGACA  
AATCGCCGTAATCCATTTTCTCCGATGTCTTTGATTGAAAGAAATGAAACTCCGCTA  
GATGGTGGTTCCCAACGGCTAGTACTGACGCAACGTCATCCGTGTCCTTGCAGAGGG  
TTCCCTGAACTAGTACAGCGATTCCATCGACTCCAAACTCCTCCCCCTTAAGATGAG  
CATCGAACGGATCGATATTTTCACCTAAGAGTCCATTTTCTACCGAAAAAATAGAGA  
AGACTTCGAAATATTCGCTATCTTTCTCAAACAATTTCGGATTTCGATCTTTTGAACCT  
TCCGAGCTGAGCACTAACAACGGGATTCATATCGCACCATCCAATTATAATTATATT  
GCCATTAGGGGTTACGTTTTCGAAAAAGCTATTCTATATATAGCCCCTCTATTAATCG  
ACACCACAGCACATTTCAAATTAAATAAGCTTGGCTCTTTGAGTGTTCCTGCGTA  
AACCAATGAAAATTACTGCACCCAAATCAAATTCATCAACTGCGGGTCGGCCGTCA  
CCTTGACCAGCTTGCCACTTGGCCCCGAAGTGCACCTGATACTCGGAGAAGCTGTCAC  
GCCAGTAGCGCCATAGCGAGGCTTCCAGGTTGGGGTTCTCGCTGCTGATCGGGTAGC  
CGACCGCCATCAGGACCTGTTTCGCGGGTTCATGCCGCCGGTGAGCTTGCCATCGTTGA  
TGGCCTGGCGAATCTTGGGCGGGAAGGTGGCGAGCTTGAGCTTGGGGTCGGCGGTG  
ACGATGTAGCGGGCGGCGAAGGCGGTGTTGTCCAGATCGCGGCTGTAGTCGTTACC  
GATGGATTGCTTTTCGCCGGCGATCTTGAGGTTGACGCGGTTGCGGCCAAAGCCGGT  
GACGCTGACCGGGGTGCCGACGGGGAGTACGCGCTTGCCGTCTTCGGCGTAGTTGCT  
GTCGCTGATCCAGCTGCCGTCGGTGCGCAGGTTGCAGCACAGAAAGCCCTCGTACTT  
GGCGACGTCGGCGGCGGTGGCCAGGGTGGAGGCGGTGAGCAGGCTCAGGGCCAGC  
AGGGAAGAACGCAAACGCATCGTAAAGACTCCTTTCTCGACGGCCGTGGCCGCGCG  
GCAATGATGAGGTGAGGCGCGCCGCCATTTCCCAACGGCGCGCAGGCATTGTGCG  
AGCCTCGGGCAGCTTGGCAAGCGCGGCGGGTGACGCGGCCGGCATCGGTTTGTGTA  
TGCTCGGAGCCGTGGAAACCCTCTCACCCGCCGAGATTGCCGAGCAGATCGCCGAG  
TTGCGGCGCGCCACCGCGCGTGTGGACGAGGAGATTCAGCGCGTGCCCGCGAACAT  
GGACGACGAGCTGCAGATGAAGCGCTTGAAGAAGCGCAAGCTGCATCTCAAGGACT  
GCATTACGCGGTTGGAAATGGAGCTGGTGCCTGACGAGCCGGCGTGAGGTTTATGC  
ATGCGGTTGCTTGGGCTTGCTTTGCGGTGGTGGGCTCACTTGCCCCCGCCGCGCGT  
CCGGCCCCGCTTACGGCGCGGGCGCTCCAGGACAGGTGGAAAAAGCAGTTGTGTGC  
CCAGCCACCATCACCTGTTGTTGAAACGTCTGGGGGCGGAAGGTCGAGTCCGTTTGT  
ACGCAGTTCATCCGGAACCATTTCTTCGCTGCGCTCATATGTCCGTGGGGGCTAATA  
AAACAGCGTGCGGGGCCTGCGCGATCTTCGCCAAGGCCTTCGTAACCTTCTCAAAG  
ATAGGTCGCGATGCACCAACTTTCTGTGGTTCCTGCCTTGGATCTGAAGCCGGTCAC  
GCGTTATTGAAGAATCGCTGGAAGTTCGCTTTCGTAAGCGGTTGCGTGTTGAATCTCG  
TACTGATATGCAAGCGAATCCTCAAACGAAGTGTACATCGGTTCCAGAGCTCCGCTC  
TGAGGATGCTCCTGAAGAAACCAGCGGTGAGGGTGATCGCCCTCTCCATGGGCGCG  
TAATGCGCCACGCGCTTCCTCAAAGATCTGGGCGCTCGACAGGCTGGTGTGTTATTC  
GATGCGCTCGAGCTCTCGCGCATAGCTGCTAGCATTGAATGCGCCGTATTGGGCAAG  
GCCGTACACGGCCTCTGCTTCGGAAGTACGGGCCAGATTATTCATTTCGAACACCAG

CGCGCTGACCAGGGACGGTCCGTCTCCACTCCCGGCATTTGACAACGTTTGCGGCGA  
AAGGAGAATGGCGCGATTGGTTAAATCCGTTGACGCGACGTTGACGTTCCCCTCGCG  
AATGTCAACCCCTCCTTCGTCCCGAACTTTTTCTGCCACAGCCCTGAATGTAGGCGA  
ACTGCGGTAGAGATCACCAAGCACGTGAATGGCTCTCGTCAAACGACTATCCCTCG  
GGTCACTCACACGGAGACTGGTCCGTATGGAGGACCAATGAGAAGGCGACGTACGC  
GCTGCCGTCGAGCGCAGCGATAACCCACCAAGTACCGAAGACCGCGTGCTTTGGGT  
CGGACCCGCTGACGCACCTTGTGGCATCGGGCTAGTTGAAGCAGCGGAGGACGAAT  
CGCCACCGTAAACACTCGTCGAATTTTTGGATACACACAGTCCCATGATCAACTCCG  
TCTAGTACGTATTCGAACGTTAAACACACCAATGGGCGACTGCGGCGCGCCAGCG  
AAATGGAGGAGTTCAAAGCGATTCTCGTAGATCTGCCTGATGGTGAACATTGGCAA  
GCTTCCTAGAGTAGCCCGCTCTCTTGCCCTAGCCCGCGCGTAGCAGGACCTTGCCAC  
TGCGTCCCGGTTTCGGCACTTGCCGCGGCGGCCTTGCGGCGCATCTTCAGATCGAACA  
CTGCTTCCACCGGCAGGGCCAGGGTGCCGTCGAGTGCGGCCTTGAGCAGTTCGCCG  
ATCATGCGGCGCTTGTCTCGGGCTTGGTGGCGGCGCGTGGCCTTGCTGCCCCAGAAG  
CCGCGCACGCTGGCCTGCTTGAAGATCACATCGCCGCTGGAGATCTGCAGCGGCTCG  
CCGGTCATCGAGCCGAACGAGATCAGCTCGCCGCTTTCGGCCAGCAGCGCCATCAA  
CTCTCCGGCCGCGCTGCCGGCCACCGAGTCGATGGCGCGCACGATCGGCGCGTCGC  
CGGCCAGCGCGCGCGCCTTGTCTGCCAGCCGTCCTGCGCGGTGGAGACCGCGTTGC  
CGATGCCCAGTGCCTGTAACCTCGTCCACGCCGGCATCGCGACGCACCAGGTTGATCA  
CGTTGATGCCGCGTGCGGCGGCGAGCATGGCTAAGGTCTTGCCGACGGCGCCATTA  
GCGGTGT

>CONTIG\_53\_length\_8033\_cov\_7.032760

GGCCATTGAGTCCGAGCGCAAAGTGCTGATCGCTTTCGCTCTCAACGACATGAAGGC  
CGATCCGTACATCCGCACTAAGGGCGAACATGCAGGCGAAGCAGCAGCGAGCCTTC  
AATCGACGTTAGTCCACATCGGTATGATCAAGATCGATGGTCAGCGGGTTTACCCCC  
CTGCCTCAGTGGGCAACGAGTTGCCGCCTGCAGTTGACGCACACGTTTCCGAGGCCG  
ATGAAAGCTCCGAGAACGTTACCACTACCGAGACAGCTGAGCGCGCTGAGCGCGAG  
CCTGAGGTCGAAGTAGAGGACAGCGAGCCAGCGATGGCTGCTTCGTTCTGATCCGA  
CAAAGCCCCGTTCCAAGGGGCTGATCATTCCCTCCCTCTAGCATGCACCTCCCTTAC  
GGGGAGGCGCATGTCTTCATCTTTTAAATCGCATGCAACCACAAGCCACCGAGCAG  
CCTGGTTGTTACATTATTCAGGAGCATCCCCATGCCTCTAGCAAACCGTTTCTCAGGT  
CATTCCCCTGTGCTGCGCGCAGATCGTCCGCTGTCTGACGAGCAAATACGTGCCGTA  
GCACCCTCAATTTTTGCCGACTCGCCTCACGGAAGTCGGTCTGACCGATACGCCTAC  
ATCCCAACCGCAACCGTCCTTACCAAGTTGCGCAACGAAGGTTTCGAACCTTTTCATG  
GTCTGCCAAACTCGCGTCCGTAATGAGGACCGGCGCGAGTACACGAAGCATCTCAT  
TCGCATGCGTCATGCCAGCCAGATCAATGGTTCGGAAGCTAACGAAATCATTCTGCT  
CAACAGTCACGATGGAACGAGCAGCTACCAGATGCTCGCTGGCATGTTCCGTTTCGT  
GTGTCACAACGGTTTGGTCTGCGGTGACACTACCGCAGACATACGCGTGCCTCATAA  
GGGCGATGTAGCCGGTCAAGTGATCGAAGGAGCGTTCGAAGTCCTGCGAGGATTTCG

AGCGAGTGCAGGCGTCGAGAGATGCCATGCAAGCCATCACGCTGGAGGCGGGCGA  
AGAAGAACTCCTCGCTCGATCCGCGTTGGCACTCAGATACGACGATCCGAGCAAAC  
CTGCGCCTATTACAGAAAAACAGCTGCTTGCGCCACGGCGTTTCGATGATCGCCGCT  
CAGACCTGTGGTCGGTTTTTAACCGCGTTCAGGAAAACATTGTGAGAGGCGGCCTAT  
CGGCACGTGCGGCCAACGGCCGTCGACAGCGTACTCGAGAAGTGCAAGGCATCGAC  
CAAAACATCCGCCTCAACAGGGCGCTGTGGATCCTGGCCGACGGTATGCGTCAGTT  
GAAGGCCTAGTGCCGCGCGGTCTCGCCCTTCATGGGCGCGGTCCGCTTTTTTTCAT  
CATCAGCTTCATCACAAGGAGCACCGTAATGGCGGCTAAATCAACCCTTCAATTCGC  
TTCACCGATAATTGTCTCTGGACAGCTCACGCTGCGCACCATCCGCGGACGTAACGG  
CCCGTTCAATGTAGGACGTCTCGTCACACCTCACGGTGAGTTTGCGGTCAAGGATGC  
AGAGCTTGAGCAATACGCCGAAGGCAAGTACGACGGCGAATTCCACATACGCTTCA  
TTTATCCAAAAGCCTATCCCACAGCCGGTGAATGCGTTTCGAGATCCGGGCCAATC  
TGGACGGAATGACCCTTTCAGGGATCGACCGATTGAGCCGAGATGATGCTCACAGC  
TTCGCTTCGCAGGAGGTGGATCCACTTGATGAGGAACTGGGAGCGCAACCCGTGGA  
GAAAGCGCGCGCAGCGCTCAGTTCGGAACCTGCCGCAGTGCGGGCATCGACTGATC  
CTCTGATGGATAACCACGCCTTTTGGTGTGGAAGCGTCATTGGTAACGGTGGCCGACT  
CTGGTAGCCCTGACAGCGATGACGTTGCGTTGTTTCGGCACGCTATGGCCGTTGGGAG  
AATCCGTGAAGCTGGATTCGACCATTGACCGGCGAACGCTGCGCGCACAGATCGCT  
CGTCTAGGCGACTTGGGCTATGCGCTTGATTTCAAGTTGCAGGAATGGAAACGCCAG  
TTGCATCAGCAGGTGGCGTAATCACTGCGCCGTATACACGGTGCTTCATCCCCTGCT  
GGAGTTCCTTCCCGGCCGGGGAGGACTCTGGCCTTTTTCTTGAGGTCTCTATCATGTC  
CACATTTTCTTGCAATACACACTTACAGCTCTCCGGTGATGCTGACGCTGCGCTTGAT  
GAAAATATGTGGCGCGCCGTCTGTGAGACCGTTGCCGCACAGGCCAACAATGGTTG  
CGGCTTGTCTTACGAATACTACGTCGACCGCTTCAGCTCGGCGATTGATAGTCACGT  
TGTCGGATTGCCCCGAAACACAGCGTGCGCATGCTTTGCAAATTGCAACACAGGAATG  
GAGCTACGCAACACCTGCCGAGAGGCAGGAGGCTCAGAACTGGAATGCCGAGAAT  
GGCTGCTGCACGCACGGCATCGAGCTGGGTTATTGCCCGGCGGGTTGCGGTTTCGTAT  
AGGAGTGCACGATGAAGACCTCGCTGCAATCCCTATCACCCGAAGTCTAGGCCTG  
GTTGAGGGTCAGCTTTCCAACGATGAAGTCTCGTCTGACGATGAGTTAGTGCCGTAC  
TTCATCCAATCTGGCCTGACAGAGGTACAGGCGCGTGACGCCATCAGCTTTCGGCCG  
CGCTATCGGATCAACGTGTATCTCGCTGGCCACACTCCGATCCGCAATGAAGGGATC  
GTGTTGCGGTTCAATCCGCACAAGGGCGAATTCGAAGCCGATTAGCGGCTCTTTCTT  
CCATCCCACGGGGCAGCTTTGCCCTCGCGGGTGCTGCTGCCCCTCGCTATCTACGAG  
GACACCAGCATGTCTAAAGGTGCTTTCACACACCCCTCTCTATCGCATCGACGAGTGC  
AGCGACCTTATGGCCGACGCCTGTGTCTGCGGCGATCAAGGTGATCTAGTTTTCTC  
TCCGTTTGGGCTCGTGATACTGCGGTCCAGCAGTTGTTGGCTCGGTTGACCCTGGGT  
CGCGACGAGGATGGTCTGGGTCAGCTTCATCTCATCAACGAACATGGGGGCAATGT  
CCCTGTATTCTGTTGGTTCAATCGACCGTTTTTGATAAGCGACTAACCCGCGCATATCG  
CCGCACGCTGTTTGGTTCCATGGTCAATCTTTGGCTGTTTCGACCGGCGTTGCATTCAA  
CCTGATAAGACCAACGCCAGCGCGGTTGCACTGCTGCCGCGCCACGCAACTGATCC

GACCTCACGACTGTGGCACCTCGTCAAAGATACCTGTCCGCTGCCGTTGCTTGATCA  
CTGGCAAGAGCCGGTACTGGCGCTGCTACGCGAGCGCTTCATGCTCAGGAACATGC  
CTGTAGCTCTCGGTCCACTGCAAGGTTTTTCAGTTGGCGCTTGATGTCCCGGCGCTTAC  
TGAGGCATTGAGTGAGTTGATCCGTAGCGGTGTCTCACTGCCCATCCGCAGTCGGC  
TGACCCGAAGTTGCTGATTGATGTGATGGCCTGATCTACCTGTCACGCAGTTGCGCG  
CACCACGCGCGCTTCTGCCTTTTCATTTCCCTAGCCAATTAGGAGACTGCTATGGCAC  
TCATGTTTTCCGCGGCTTGCCCGCAATTTGCGCAAGAACGGGTACTACCCGACCGACG  
AAACGACGCTCGAACGAGCGCTTTCCGCACTGGCGCCCAGCGATGGGCCAATGTGC  
ATCATCGATCCCTGTGCCGGCGAAGGCGTTGCCATCGCAGAAGCTGCACACGTACTC  
GGGCACGGGAGGACCACCTCTTACGCGGTGAGTACGACCAGGAGCGTGCATACCA  
CGCTCACTCACTGGTCGACCACTGCCTCCATGGCGATGTTATGGACACAGTGATTTC  
GCGGCAGAGCTTCGGCCTGCTGTGGCTTAACCCTCCTTACGGCGATCTAGCTAGAGA  
TGCCAATGGCAACATTGGCTACGAGGGGCAAGGGTCGTGCCCCGTCTTGAAAAGCTTTT  
CTACCAGAGGACGCTGCAGTTCCTGCAATACGACGGCATCCTCATTTTTATGGTGCC  
GTCATACGTGCTCGACCCCGAACTGGTCGGGTGGCTGACACGCCACTTCGCTGATCT  
GAGCATCTACCGTGCGGTGGATACGCAGTTCAAACAAGTGGTGGTATTTCGGACGAC  
GTGTTTCGCCAGCGTGAGTTGGTGGGAGACGACACTAAGGACATTCGTGGGCGACTG  
CTTCAGATCGGGCAAGGTGAGCTCGACCTGGATGAAATACCAGCCCAGTGGACGCT  
ACCTCCCTATGTCGTTCTGTAAACCAAGTCTGAGCCAGAGCATTTCTACCGGCTAAG  
CATGGAGCCGACGCAATTTGCGGAGGAGGTTTCTCGTCTCCAAGGCTTGTGGCCCGC  
ATTCGAAACGCACCTTGGTGCGGCTCAGCAATCGATGCGTGCCCCGGTACGTGCGTT  
GTCCCCTGACCTTGGCACTCGCCCTTGCGGCTGGCGCCATATCTGGTGTAGTGCA  
ATCCAAGAATGGCCGAGTCCTGGCCGTGAAAGGAGATACCTACAAGCAGAAGGCCA  
CCGCCGTGGAATACCGCGAGCGCGACGATGGTTCAGTTGCAGAGACGCGAATCCTC  
ACAGACAAATTCGTACCTGTAATCCGCGCTTGGGACCTGTCTCCCAACTCTGACTCG  
TTCGGCCGAATTATCACCATCCACTGACCCGCTTCGGCTGTTTCGTTTTCATAGATGGA  
GCACCACCACGTTTGTGCTCGCTCAGTAGAACTTCTTTTCCAGCGGCCTTGCGTCGCC  
TTTTAACCTTCAACCCCTTGGGGCGTTCACCGCCCTCGGGGGTGGTGCGTGCCCCGA  
TTTTTATGGAGCATCACCATGACTACTCAACTCAATGCGGCTCATACCGCGGAAAAG  
GCGCTGATCAACGGCAATCCGCCTGATTTGCTTGATCAGAGTGATCCCGCATCGTCG  
GAGCTCTCACTCAGTCTGCAGGACTTCGTTACAGAGTTTGGCGACGAGCTTTTGAAC  
TCTCTCAATCAGGCCAATCCGCCTGTTTACAGCGGTTCCGCCACGCACTAATCGTCAG  
CTTGTCCTGCTGGGCCTAAAGCGCAAACCTTTTTCCAGCGCAAGCAGAGGTCGTCCAT  
GCGGCTGCAGAGCTGCTCGCTAACCACGACGAGCGTGCGGCAATCGTCAACGGTGA  
AATGGGCACAGGTAAAACCACTGTCGGCATCGCGCTGGCAGCGGTTCTCCACGCGG  
AGGGATATCGCCGCACCTTGGTTCTCAGCCCGCCGCACTTGGTTTACAAGTGGCACC  
GAGAAATTCTGGAAACTGTTGCCGGCGCAAAGGTCTGGGTGCTTAACGGACCGGAC  
ACGTTGCTCAAACCTCATCAAGCTGCGCGAGCAGCTGGGCGTCCCGGCCCGCGGTCA  
GGAGTTCTTTATCATCGGCAGAGTGCGCATGCGCATGGGCTTTCACTGGAGGCCTGC  
TTTCGCACGCAAGCGCACTCGATTCTGGGGTGTGGGCGCATGTCCGCATTGCGGAAG

CGTCGTCAACAACATGGATGGAGAGCCGCTTGACGCTCTGGAGCTTGAAGCAGAAG  
AAGCACGCCGCAGATGCAGCGTCTGCGATACCGCATTGTGGACGTTGGTTCGTCCGC  
GAACCCTCTCCAGCAGCGATCAGTCATCGGCTGTGCTAAGAGCTTTGAAGCGTATCC  
CGACAATCGGTGAGGCCACTGCGCAGAACTGATGAAGACGTTCTGGGGGATAGCTTC  
TTGGCCTCGATGCTTGGCGACAACCTCCACAATTTTCATCAACTTGATGGACGACAAG  
GGAGAGCTGGTCTTTTCTGATAGGCAGGCCCAACGGATGGAGCGTGCGATGTCCAG  
CATGGAGTTCGGGTTTGGCGAAGGTGGCTACCAGGCTTCCGAGTACGTCAAACGCTA  
TCTCCCGCAGGGCACCTTCGATTTGCTCATCGCAGACGAAGCGCATGAGTACAAGAC  
GGGTGGGTCTGCGCAGGGCCAGGCGATGGGCGTTATTGCGGCCAAGGTCCGTAAGA  
CCTTGCTACTCACCGGCACCCTGATGGGGGGCTATGCCGATGATCTGTTTCATCTGCT  
ATTCGCGGGCTTTGCCCCGACGCATGATCGAAGACGGCTACCGTCCGAGCAGCAGCG  
GCAGCATGAATGCCGCCGCCATGGCGTTCATGAGGGATCACGGCGTACTGAAGGAT  
ATTTATTCCGAGAGCGATGGGCCGGCCCCACAAGACCGCCAAGGGGCTCGAAGATCAC  
TGTCGGAACGGTAAAGGGCCCCGGGTTCGGTCCGAAGGGGGTGCTGCGCTGCGTCCT  
GCCCTACACGATCTTCCTGAAGTTGCGCGACATCGGAGGCGTCCTGCCACCGTATGA  
AGAAGAGCTCCGGGAGGTTCGCGATGGGTGAGGCGCAGGCAGCCGTCTACCGGGAAT  
TGGCTGCTCGTCTCACTGCTGAGCTCAAGGAGGCACTGCGCAAGCGGGATACCACCT  
TGTTGGGTGTAGTGCTCAACGTGCTACTGGCATGGTCCGACTGCTGCTTCCGTGCTG  
AACTGTGCGTCATCCGAGGACGCGCCAGGTCTTGGCGTTCACACCAGCCCAGTTCA  
ATGAGCTGGAAATCATGCCTAAAGAGCGTGAGCTCATTGATATTTGTCGCGAGGAG  
AAAGAGGCGGGTCGCAAGACCCTGGTCTATTCGGTCTATACCGGCAAGCGCGACAC  
CACGTCGCGTTTGAAGGGGTTGCTGGAGCAGGAGGGTTTCAAGGTGGCCGTGCTGC  
GCGCGAGCGTTGATGCAAGCCGCCGCGAGGACTGGATTGCCGAGCAGCTTGACCGA  
GGGATTGATGTTCTCATCACCAACCCTGAGCTTGTCAAAACAGGGGCTGGATCTGCTG  
GAGTTCCCCACGATTGTCTTCATGCAATCAGGGTGGAACATCTACACGCTTCAGCAG  
GCCGCACGTCGCTCATGGCGTATAGGCCAGAAGTTGCGTGTGAGGGTGATCTACTTG  
GGGTACATGGCCACGTCGCAGATGACGTGCCTTGCTCTGATGGCCAAAAAATCCTG  
GTTTCGCAAAGCACGTTCGGGCGACGTCCCGGAATCGGGGCTTGACGTGCTCAATCA  
GGACGGCGACTCAATTGAGGTCGCTTTGGCAAGGCAGCTTGTTGCTGCTTGATGTCC  
AGAATCAGCCGGCACCCCTTCGGGGCGCCGGCTTTTTTTTCTAATGCATACTTCTGCTA  
CCGATGGTTTGACAATCAGCACGCCAGAACATGGATGAGCGCTAATTCGCATTCTTT  
ACTGACCGGGGTTGCTGTCTGCAGGGAAGGTGTCGGCTTACTGCAACAGGAAGCCG  
GTTTCATGCAAAACATCTGCTGCTCCTCACTCCTGGCTGGCTGTGGACTGGTAGTCGC  
TGCCATTTTTATTGGTGGTTGCGCCACTACGTCTTCAGAAGTTCAGCCACCCCTACT  
GCTGAGGTAATCGCTCCCCGCGACCAGACCAATCCGGAGTTGATTCCAGTGATCCGC  
TATGGGCGCTACACCCTGGTTGAACTGTCTCCTGGCTCAGCACAGCGTGACCTACTG  
CTGCAGGTCATCGATGTGCGGATGCCAGACGAAGCGAGAGCTAGCGTTGGCGATGG  
CCTACGCCACGTTCTCAACCGGAGTGGCTACCAAATGTGTGAGACGGGATCTGCCGC  
CCTTGAACCTACCCGCTCCCAATGCCCCGCCGCCACCTGCAATTGGGCCCTATGAC  
CCTGCGCGATGCGCTACTCACTCTGGCAGGCCCTGCTTGGGATGTTGAGGTCAATGA

CAGCACACGGCAGGTGTGCTTTGTGCGTCCTGGAACATCATGTTGAACTTCCATCTCA  
GGATCTTCAGAGCTCTGGGCCGGCTCAGGTGTTTCCGCAAGCTGGAGCCCAGCAATG  
ACTAGATCCAGGATCATCTCCGGCGCGAAACATTCACGAGCCTACTCGATCATCCAG  
ATATTGCTGTGGGTGTGGCTTGTCTGGGCTTATGGCCTTAGTGATGATCGCGTTGCTCG  
CTGTGCAGTCGCAACGCGAAAAGACCCTCAATC

>CONTIG\_54\_length\_7979\_cov\_6.471854

ACCACGTGCCTGCAGAAAGTCTCTTTTATTCTCCCGGCATTGATTTTTGTGAATGACGG  
CGGCGTACTGCGTGTGCGCCATCCGCAGATGTGGCATCAATGAGAAGTGTGATGCCAT  
GGCGAAAGCTGCCATGCCACCAGCTGAGCCTTGGACACCGAAGGTCACCGTACCGT  
ATGCGGGCGAAAAGGTCGTATTGGTCTACGCGGACAGCGAAGAAACATTGACCCCT  
TAATTCCAGTCAAGGAGCGATGCAATGAGCACCGATTTTCGAGATTAACCGGCCTGA  
CCAAAAATATACAGCAAATGTTACGCGATCATGGTTCACGAAGTACCGCTTGAGCAA  
ATTCCATTAGCTTTAGATGATTTACACAGAGCGCTTAAATGAGCATTTTTTTGTCTACT  
ATTCAACGTGGCTTGCTGAGCTGCTGAACGACCTTCGATGGGGCCTACAAGAATATC  
TTCGCCCTATCTTCAAAGAAAGCTATAAATCCGCCCCAGATATTAGCGATTTAGCAT  
ACAGGTACGATTATCCAATCAGTATAGACGCTGCCATACCACAATCATGGTTTTGGA  
AATTAATGAACAATGTTTCGTACTGGACCTTATTTTTGAAAAATTCAGTGCATCAGAG  
TATTTAAAAATGGAATATATTTGATTGCACTTTGCGAATCCCATCGCTTTTTTTCCGT  
GAGCCAACCCGTTTATTGGGCGAGACAGCGATGTCACAAGTTGGATGGGAGATTAA  
ATTGACTGACTTGTCTATGACGAGTGCTGTTACAGGAAGCTCATTGAAGTACGACTAG  
GTAGAGGCGTTTCAATGTGGGCAACTGCACAACCTCAATGCCGGCGGAGTAGA  
TCGCCAATGTAGCCTGTGTGCTAATCGTACATTATTAGTCATTGATACTTAGAATTCT  
ATATTCTACGAATATTTTCATTTTTTGCGGATCGACATCTCCATATGAAGAATTTATCCG  
ACTTTTTAAGCCGACCATTCTCACCTCGAATAGCAGTGTAATCGATTGGCTTATCTCA  
CTGCGGCTTACATGTTTCGCATCTTCGGCGAGCCCTCAAATGACTTTGTAGGATTTTT  
TATAGATCTATCATTATGCTGCAAAAAGTCTCAATGCGCGTAATAAAAGTGCAATCTA  
AGGACAAAGTTGTGCGATAAGAGCGAACAGCAAGACGCTTTGGCGATCAGCTGATAC  
CCAACAGGTCTTGATAACACGTAACCTAGCATCAAAGCTCACTCAAGCACCTGTGAT  
GGACGAATGGAAGTTGATCAACCCCGCATTCCAATGCTTCGCCATTTCATTACCATCG  
GATTAGACAGACTACCTTAGTGGTTAATTCTAGACGCATTTATCAAATCATCGCTG  
GTGCTGCGCTGTGTAGTAACGCGTAAGTAGGCCGAGACTCGCTCAGCATGTCGCCCT  
GCGCCACCATACGGCAGGGCCTCTTTGGCCCCGGAAGGTTTTGGATATAGCAATTGC  
GTGTAGGAGATGGATCAATGCACGAAGGTGTGCCCATTTCAAAGGTTTTCTACTTCC  
CAATTGAAGCGGCTATACGCTGGGCGGGCTTACTCAAGCACCAAGGTGCAATTCTG  
AGCCAGATCCCATCGCCTAGGGATCTCCCGCACACACTCGATTTCCCGCGCTGGACG  
GAGCTTCGTCTTTATACCGAGCGTCTCTACGATGCCATTTTCCACCATGAACTGCCTT  
ACGGCATCAAGGGCATTACGGTGGAGGACGAAGACCTATGGGACTCACCGGAGTTG  
ACTATCCGACATGTCGATCTCAAGCAGTGGATGCGACATCACTACCCGGAACACAG  
ACCCGCTTTCCTCTTCAGCCGAAGTGAGCGCATGGCTCATCCAACCATCACGCTTGA

AACTGGCCACGCCTTGTTGGTTGAGCGTCAGGCAATGAAAGCGGAGCTGCAACACT  
ACAAACGCCAACTCAAGGCACTGCAGGAGCAGCACGATGACCTGTTGAGTCATAGC  
AAACAGAACCGTGTCTGCAGCCATTGCTCCATCACAGATAGGTCTGAATCTACGTAT  
CAAAACATTCTAGGGGGGCATGTTGGACTTGATGCTTTCTCGATCACCAGCAGGCAAG  
CCGTACTCCAGCTTCAGAACCCAAGAGGCCATTGTTTCTGCTCTTGTTGCTCACCAC  
GGCGGTTTGATGGGCATCACTGAGCGAACCCTGAACGGTAAGTTTGCTCAGGCACGT  
CGCAAGATCCGAAGTGCAGAGACATCGGGTGGCCACACTTCGTTAGTGGCAGATTT  
AGCACCCGGTTAGCAGCCCAACCATCAGCTTGCAAGCTTGTATGTGCAAGATCAAAT  
ACTGCATTTGCAATGTCTTTTGCTAGCCATGTGTATTGAATAAGGGCACGCCAACGA  
ACGCCACTGAGCGCTAAGGAGTGTCCACGATGTTGCAAGTGCCTGCCCTCCCACAG  
GGGGAGCGCCGCATTCTGCGGCTTGACGAAGTTGAAGCCAAATCGGGATTCAAGCG  
TGCCCACATCTACGCACTGATGAAAAAGGGTGAGTTCCCACAGGCGCTGCGTTTGGG  
CGTTCGTGCAGTCGGCTGGGATTCCGTAGAAGTAGACCTCTGGATCAGTGAGCGGTT  
AAATAACCGGGTGCAACAACCCGCTCTCCACGTAACGTCTAGGGAGAGCAACGAT  
GCAGATCGTATCCATTATTTCCACGAAGGGTGGCGTCGGTAAGACGACTACCGCAGC  
GAACCTGGGTGGCTTGGCCGCTGACGCGGGCATCCGTGTACTGCTGCTTGATCTGGA  
TGTCCAGCCCACTTTGTCATCGTACTTCGAGCTGACGCACAGGGCTGCTGGTGGCAT  
CTATGAGCTACTTGCTTTCAATGAACAGCGCACCGATCAACTGATATCTCGGACCGT  
GATCCAAGGGCTAGATCTTGTTCTGTCTAACGATGATCGCGGCGATCTAAATACTTT  
GCTCCTACATGCCCTGACGGGCGTCTGCGCTTACGGCACTTGCTACCTATCTTTGCG  
CCAGATTACGACCTCGTATTGATCGACACGCAGGGTGCTCGCAGTGTACTCCTTGAG  
ATGGCCGTTCTTGCCCTCGAACATGGCCCTATCCCCGGTTACACCAGAGATACTGGCC  
GCGCGGGAGCTGCGTCGCGGTACGTTACAGCTGCTGGAGGACATCGCTCCTTATCGT  
CACCTCGGTATAGAGCCTCCAACGCTACATCTATTGATCAACCGAGTGCATCCGGTC  
TCCTCCAACGCTCGACTCATCCAACAAGCCCTGCGTGATGTATTCGATGCACATCCA  
GGCGTCTACGTGCTCAATACTGATGTTCCGGCGATCGAAGCCTACCCGCGCGCCTCA  
ACGCGGGGCCTGCCGGTTCATCGGATTGAACACCGCCAGCCCTCTGGCCGAGTCGCC  
CCCGCAGCATTAGAGACGATGCAGTCACTGGCCGGAGAGTTGTTCCCGAACTGGCG  
TGAACGCTTTGCGTTGGTCAAGGGCAAGCCCACTGATTCCTCGGGAGCCCGCCATGG  
CGAACGTGCATGAACTGGCCCGCGGGAACAAGCGTCTGAAAACACTGATCGAATTT  
GCTCTCGCCGAAGGGTGGCACATCCAGCGAACACAAGGCGGGCACTTGAAGTTCAC  
CAAAGTGGGCTGCGCCCCGATCTACACCAGCTCGACGGCAAGTGACCATCGCGCCA  
GCCTCAATGCGCGAGCTCAGCTCCGGCGAGCTGAGCGTGAGGCGGAAGACGCTGTG  
GCGATTTTCGATGGAGAGTAAACGCCATGGTTGAGATCACGCCTCAAGACATGGCCG  
GGAAGTTGCTCGCCGCCGATTCCAGCGTAACGGGGAATCCGCCTCGGCCCTTAGC  
GACCCAATTGCCGACACGCCGATGGTCGTGACACTGGACCAGTTGCGTCCTTATGAG  
CACGACCCGCGCGTGAAGCGTAACCCTGCTTATGAAGAGATCAAGGCGTCTATTCTG  
GAGCGTGGGCTTGATGCGCCTCCCTCTATCACACGACGGCCGGGTGAGGAGCACTTC  
ATTATCCGCAGCGGCGGTAACACCCGTCTCGCCATCCTGCGTGACTTGTGGTTCGGAG  
ACGAAACAGGAACGCTTCTATCGTATTTCTGCTTTTCCGTCCTTGGCCTGAGCGCG

GTGAGATTGTAGCGCTGACCGGTCACCTCGCTGAGAACGAGCTGCGCGGCGGTCTG  
ACCTTCATCGAACGCGCCCTCGGAGTCGAGAAAGTACGAGAACTCTATGAGAAGGA  
GAAGGGAAGTGCGTTGAGCCAGTCTGAACTTGCCCGGCGTCTATCAGCGGACGGAT  
ACCCCATCCAGCAGTCACATATCAGCCGAATGCAGGATGCTGTCCAACATCTCTTGC  
CTGCCATCCCCACCTTGCTCTATGGCGGGCTGGGCCGACACCAGGTCGAGCGCGTTG  
CCGTGTTGCGTAAGGCATGCGAGCGGATTTGGCAACGGTATTCGGCCGACCGAACTC  
TGACTGTGGACTTCAGGGAGTTCTTCCAGGATGTTCTGGCACAGTTTGATGCACAAC  
CTGACGCCTTCAACATACAGCGCGTTCAAGACGAGCTGGTGGGCCAGATGGCAGAT  
CTGTTAGGCGTTGACTATGACACGCTTACCCTGGATCTCAACGATAGCGAAAGCCGT  
CAACGTGCTTTGGTTACCGAGCCAGCCGCCAGTTCGATTTCCACTCCCCACCCTGTCT  
CGTCTTCGGCTCCCCAGTCCAATCTCACGTCCGTCACAACACCGGAGGGCAATGTGC  
AGAGCCTGCGTACCACACCATCGCCATCGCGAGAGAACCCAGCACCCCCCAAAAAA  
ACTATACCGGCCGATCTCATCCCGGCTGCGAGCAAGCTACCGTCGGTCCCTGCTGCG  
TCGGCTGATCAGGAGGTGGGTGATCTCGTGCAAGAGCACATCGTATCCCCTGCACAG  
ACGACCGAACGGTTGCAGTCTATCCAACGCCTGATTGCAAATGAACTCGGGGATGC  
CCTGCCTCCTGACTTCGAAGGCAATGTTCTACAGGCAATTCCCGTCCAAGCGGGTGG  
GCTCTATCCCATTACTGACGTCTGGTACATCGATCCAGGCCTCGACATTCCAGACCG  
GCTACGGGTGCACATTGCACAATTTGCTAGCGAAATTGCGGAGGGCGGCTTCGCTTGC  
AGATTGCATCGTTCCCTGCAACGACGGCATTGGGTTCAAGTGCAAACCTGAGCTGAA  
AGGGACATCCGACGTCGGCGGCGATGTGGTGATGCTTTTGGCCGCGCTAAGTGGCC  
AAGGTTTCGATTGTGCAAATGGACCGATTTGGCGGTGTCTTGCCCAGGCTGCTGCATG  
GTGCAGGTGATCCTGCAAAACGACTGAGTGACACGGCGTTGGTCAAGCTGTTCCGG  
CTCCTAAGGTTGGCTCGGCGTCTGCTGGACATTGAAATCGGTAGCACTGGTCACGGA  
TCTGAGTGAGGTAGCCTATCCATGTCTGTCACCGCATCCGCTCAACCAAGCAGTGATT  
GCGCAGGCACTACATGATCTACGCAACGGTCAACTGCGCCGATGCAAAGCCATGGG  
GTTTGGGGATGATGAGCTCGATGCTCTCAAGCACCCATCTCAGGTCAGTGTGCTGCT  
CAATGCGTCCGTCTCATGGTGTCTGTACCGTCAATCGAGATGTTCTGCGTCGGCTG  
CTGATGCAAGCGCAGGATGTTGAGAAGGAGATTGCGACAGTCGATCGCATGCTGCG  
ATTGGGAGCCAGCACAGAGATGGTCAGCCGATTCTATGGTTTGACTCACCAGGAAG  
TAGCGCTGCGCCGCGAAATTTTGGGCATGCCCAAACGCAAAGAACGTCACCCGGTA  
CTGGATGAGTCTCAGGATACGGAGCTGTGGCGTAGATGGAAAGTTCTCACCACCCA  
GCAAAACCCTTCTATGGACGATGATGCATCGGTTTTGCACATCGCAATGGATCTGTC  
CGAAAGCATGGCGCTACCACTGTCTGTGGTTTTGGTCCACGATCAATTCCTGGATCGA  
CCAGGGACTGGTTTAGGTCATGGCAGTGGATGATCCACGCCGAGGCCGCGGTCCAA  
TAGCGTTGTCGGATCTGTTCGATAAAGCGCTGAACACTCTTGCTGCAACGTCTACCC  
CAAAGACCATCGCGTCCCCCTCGCCGACACTAAGCGACGGATTTTTGTATAGCGGCA  
ACCGACACGAGAGCGTTCCCGTGCACTTTTCCTTGATCGACGATTGACACCGTTGG  
AGCGCAACGCGTGGCAGGTGTTCCGGTTATTGCTCAACGATGACGGCCTTACCGCAT  
TCCCCACCTATGACCAGCTACGCCCCTGGTTGGGCTCCATGCCCGGCAGTGCCCAAG  
CCTCGCACGAAACTGTTGCCCGAGCGCTCACTTTGCTCCGTCTTAGCCGGTGGCTGA

GTCTTGTCCGCAGAAGGCGCGACCCGAAAAGCGGACGCATTTTGGGCAATCTCTAC  
GTGCTGCACGATGAGCCGCTGACACCGTTTGAGGCGATGCAATTGGACCCGGACTA  
CCTGGGGTTAGTTAGTCAGGCGCTAGGCCATGCTGCCAAGGCCGTGCAAGTAGTGG  
GCATACAAACTCTGAAAGAGATCGCTGAGGACCCGCTGCTTACCGGACGAACGTTG  
CCCTCACGCCTGCAGGTGATGACGACTCGTCTGACCGAGGCGGGCCTCCACCCTGAC  
AGTTATCCCCAAGCAGGCACGTTCAACGAATCCGAAGAAGGTGAGCCAGCCCTTCT  
TCGGAATCTCGATCCGCATTCTTCGGAATCCGAAGCAGGGCTGGAACCCACGCCAG  
ATGGTGCTCTTCGGAATCCGAATGAGGGCCGTACAGTACGTAAAGAAAGTAATAAA  
AAAATACGTACTACTACGGGGCCCCATGTGTTGAACGGTCTGCAACTGCCCAAACGT  
TTCACCTCTTCTCAAGGAAGAGCAGCAAACAGGGGCGGCGGTGGCCTTGCAGCAGGT  
TGACCCGCTCAGTGAGGCAAGCTGTGCTAGACGAATGGGAGGCACGTTGCAGGGCCA  
GTTCCATCCGGAACCCCGCTGGCTATCTGTTCCGCATAATTCAGCGAGCTATTCGCG  
GAGAGTTCAATGCTTGGGCTGGCCAAAACCAACCGAAGGCGACGCAGCCAGCCACT  
GCGCCGACGGAACCCACTAAAGTCGCGGCACCTGAAGTAGCCCAAGAACATATCGC  
ACGATTACGAGAGATGTTGCGCTGCAGTTGACCTTGCTGGGGGAGACGCTGAGATG  
TCTCTTGGACTTCAGTGAGCTATCCCCAGGGGATAGCTTCGGGCATGCAGGCTTCT  
ACGTTTGCTCTTCTTCGTCCTCATCTTGCTGCCAATAGAGGTAGTTGAACAATGCGTC  
GAGTTCAGAGAGGTTGGTCAAACCAAGATGCTGTTGAACCTCCTGAGCATGCTGAC  
AGTACATTGCGTAGAGCTGACCGTTCACATTCCCCTTGCTCGGATGAAGCGGGTACC  
CAGTGATACCTGCTGCCGCAAGACCCGAAACGGCGTTCTGATTCATCACTGCATAGC  
GCTTGTTGTCCAGCGTATGCAGCACCTCGGTGAGCAGGTTGATACCTGCACCTGTTA  
TGCCATCGAAGTGGTGATGGACTTCGAAGGCTGTCTCAGGCGAGAGTCTGCTCCGGC  
TGACGATATCGGCCAATGCGGCTATGAATCTTGAGATTGCTCGGCCATTCGAGTGT  
TCTGCCTATGCAGACCTCCTGAGTGGAAGTATCAATGAGCTGATTGTATGCAGGTA  
AAAATGAGCTTGCCGAAGGACGACGCAGCGTAGCCATATCCTTGATCTGCTGCCTGG  
CTCTCATGAGATTTTCTTTTCTGGCTGTTTGCTGTGCGGCGAAACCACTGCTCGATTT  
GTTGCGTTTCATCTCGTCCAACCTGGTACGCCAGCGACGTCCACCCAATTTTGAGTAG  
CGCCTCAGTTTGGAGTCCAATTCCCTACCCCGAGG

>CONTIG\_55\_length\_7959\_cov\_14.309627

TGGCGCGCATGGTCGTCAACCTTCTCTGGCTTAGTCACCTTGAAGATTGCGCCATGC  
GCGCACTTTCTTCCAGACGATCATGGCGCAAGTGATTGATCTGACACGAGTAAATGT  
GGGGAAACCTCAGGGCAGGAGCCCCCTTCTTGCGGATGGACTGGACCTGGAGTGGG  
AAGATAGAGCGGTGGCTGGGGCGGGAGCCCTGGCCTGGTGCCATCCCGTCCCCGGA  
GGGGGCTTTTAAGGCGCGGCAGAGCCGCGTTCTTTTGAGTTCTATAAAAGAAAAGG  
CAAGGTCAAAAGCGGCCAGGGCAAAAGCAGTCTTGGGAGAAAAGACAGGGGAAAA  
GCAGCAGCGGCTTCTGCCGTGCCCTGGCCTTGCTTGAAATGTGAGGCGCTGCAACGG  
TTTATCAAATCTGCTTTAGGTCCGACAGTTTTTAACTTTAGTCAAAAATGATCGGTTA  
AATATATTGTCAAATAATCGTTTTCTCGTAACCTGAAATCAGAGGAAAGCAAGCCGC  
TTTCGAAAAAAGAACCAAGCCATGTTACCCCTAACTTTCTACATCGCAAGCCTGCT

CATTGGTGCTTTTGCTGGCCTCGCCATCGCTGACCGCATCGAAGCCAGTCCACACTT  
CAACTAAGGACATATCAAATGAAGAATTTTCCGTTTAACGAATCCGGATTTGATGAC  
ATGAGGGCCTGGATCGCTGACAACCAAGCCAAGTTCAACAGCCTCTATTACGACGC  
ACAAGAGATGGCTCGGATCATCGGTGGCGATGCCTGGCTCTTCCATTGCGATTTCTG  
GGAACAGTTTCGAAGAGGACGACAGCAATCACGATCAGCTGGTTGAAGACGCGAACT  
GGGACTTCAGTCCAGAAGGATTCGAGCGCTATCAGACCCTGTTGTTTCGTCAAAGCAG  
GGGTAGATGAGGCGCGGGTCCGCAGCGAAATGCGCCAACTGGAAACGATGGAGGG  
GGAACAGCAATGAGCACCACCGCCAGCCACTTGAAAAAGATTCCCCAGCACCCGCC  
AGCCTCAACCCCTTTGGCCCTGCTCCACTTCCTCGTCCTTGGGGTCAGCGGCCTGGCC  
ATCGGCCAACTGGGCTGGCAACTGCTCACCGGGCCGTGGTCCAGCCTCAAACACAT  
CGCCACCGGCCTGCTGCTCAGCCTGGTGCCGGTCGTGGTCATCGCCGTGTGGTCGCT  
CTGCCTCTTTGGCATCGCCAGCACGTCCAACCTCAACTGAAATCGAACACCTGATCC  
GGGAGGAAACCAGCCATGCGCAAGATCTTCAACAAGCTTCTCAACATCGCCATCTTC  
GGAGTGGTCATCTTCGCCCTGGACAAGGTTCCGGAGCGTCTTGATCGCATGACGCAT  
ACCGCCCAAACTTGCTCAGAACGTCGGCTACTCGGGACCAATGGCTGGGATTCC  
CAATGGGATGCCTGACGACATCGACTGGTAAGAATGGATAGATCGATCTACTCATTG  
AAGGACCTGTTGGCCTGCGCCCAAGCCGCAGGGACCGATGATCTGGCGTTTGCGCA  
ACTCAAGCGCTGGGTGGAGGGTGGGGCAAATCTTTTTCAACCGCTTGCCCGCATGGA  
CGTGGACCAGGATCCGTTTGTGGAGGCCGGGGACACGGTCGCTGGAGTGATCTTCC  
GCGAGCTTGGTGCGGGTCTGGCTGGAGAAGGTCATCCGAGCCAGAGCAATGGACGC  
GGCGTTACCGGCATAAGTGGGACACAACAAACGCACGCGCTTCTGACTCGAATCCC  
ACGTTGAGCCGCCGGGCACATGCGCCCATCAAGCCCACGCTTCTGCAATGACTGGG  
CCCAAGGAACGAGGTGCCGCACGGAGGATGAGCCGGGACTACGGGTTGCCTTTTGC  
CGCCGCTTCGGCGCGCTTGTTGAACTCCTTCGTCCAGTCAAGCATGGCTTGCACGTC  
TGCCAATAAATCATCTGGCTCTGGGAGCCAACTGGGGCTGTCCGTGGGTTGCGAGTG  
CTCAAACGCGGAATACTTGGACATCATCCATCGATCAACGCGCAGTCCGCTGGGGT  
GATGGCGTTGAGCCGCTTGAGCTTGTTGAGTGTTTTGATCTCGCGCCGGTAGCGGTT  
GACGATGCCGGAACAGAGGTCGTCTTCCACGGACCGCTCGACCAGGATTCTGAAGT  
TGCTACAGGCCGCTTCAGGGCGAGCTCTTTCAAGGGAGCATCCAGCTTCTTGAGCT  
GCCCAATGCTGCCGACCATTGCGCCAAAGCCGGATTGGGGCTTGAGCGAAAATGTG  
TTGATCTGCGCCGGCATGCCGGTGCTGCTGCCATCGCGGGCGATCGATTCAACCGAG  
ACCTTGACCGCAGGCTGATCGAGCTTGCCCCGTTGTTTCAGCGGCATTCTGGAGAAGG  
ACCATCAGCGACAGCCGGTGCGTGAACACGATCACCTGACGATGCTCGGCCAAGTC  
CACCAGGCGTTTGGCGACCGCCTCCTCGTAACGTTGATCCAGCGAGGAGATGGGAT  
CGTCGAAGATCACCGGCAGCCCTTGCGTCAGGCCCCGTCGCGTCGGCCAGGAACGCG  
GCCAAGGTGACGATGCGTTGCTCGCCTTCGCTCAAGATCTCCCCGTTTTTACACCCG  
CCGGCCGCGTCCTTGAGTTCGATGTAGAAGGTGAACGCGCCTTTGCCTACGGCCCCG  
TGGGCCATGCGGACGGGAAGCAAGTTGCCCCCAAGGCCTGAAGCTCGGCATTGAA  
TCGATCGCAGTAGCCTTGGGCCAGCTCGGACTACCAATATCGTTGCTCTTGGACGT  
CAGCTGATTGGTCGATGTGGATCGAACGGCGGTTTCCACCGTTGCTACGCGCTTGAG

GCGAACCACATCGGCCCAAACCGCGTCGCGCTGGCCGGCCAGCCATTGTCGAGCCT  
TCAGCTCGCGAAGGCGGGTTTCCTTCTCCGCACGGCCCTTGGGGTCCAGCAGGACCG  
CCAAGGCATTGCGCTCTGCGGTCGTCGACTTGACCTTCTGATCATAGGCGTTGGTCC  
ACACCGACCACTCCACCGCCGGAGCCGCCGTGGCCTCGGTCATGGCTTTCAACCTTG  
CATGGATGGCTTTGAGAAGCTGCGTGGCTTGCTCGGTTTCCAGACCAATGGCAGCGC  
ACTGGGCTTGCCAAGCAACATCGGCGAGGGGGGCGGGCAGCGCTTTCTTCAACGCC  
TCCAAGGCGTCTTCTGCTGACTTTGCTTCCGTCTGCAGCGTGTCGTTGAGGTAATGCT  
CAAAGCTGGCCAGCCGTGCCTTGCCGTGCTCGCCCAACGGTTGCTGGCAAAGGACA  
CAACAGGCCCCCTCACCGACGTGCGGGAAGGGGTGGGCAGGGTAAGCGTGGCCGGT  
CGAATACGCCCTGGCTGCCTGCCAAAGGGTTCGCCATACGGCGTCTCCGACGCCCTT  
CAGCGGCAGACCGTTGAGGAAGGCCGTGGCGTAGGCGGTGGCGGCTTGGCGTTTGA  
CCTCCGCAGCGGTGCGCGCCTCCGTAAGCGCTTGACCTTCCCATCGCTCACGCTGT  
CTTTCAGCGCCGAGAGGCTCGTGGCCATCTGCGACAGGCGCTCCAGCTCCCCGACAG  
CCTTGGCGTGGGCCACTTCCGGATTGGCCTGTGCCAGCGCCGTCTCCAACGCCAATC  
GCTCTTCATCTAACGTGGAAGGGAAGGCGCAAGCCTTGTCGATATCGTCCTCGGTCA  
GTTTTGCTGTCAACTTGTGGAGCAACGTGGCAGCGCTGCTCTGGGAATGCTCCGCCG  
GGATGAGGGGCAGGCTGCTGGTGAGCTTGGCTGCGCGGGCCTTCAGTCGAATGGCA  
ATGCCATCGGAAATCTGGATGAGCATGCCACAAACCGCATGGCGCGTGGAAGGTG  
GGTGGCGGTGGTGGCAGTGTCCCCGAACTCCACCGCCGTAGCCGAATCAAAGACCG  
GGACCGCTTTTAGCTTCGGATGGGGGGCCGTGTGCCTCTTCCCATCCGAGATCGGAAG  
ACGCAGTGGTGCCGTGCGCCCGCGTCGCTGTGACCTTGATGAGGGCGGAAGCGGCT  
GCGGAGCCCTGCTTGAATACGTTCCCGTGGATGGATCCCTTGGCCCCGTGCCCCGCAG  
ACGTGTTTCATCAAGCGCGCGTAGCCCGATTTCCCGGCCCCGTGGGGCCCGTAGACC  
ACGGTCATCTGCCCCTGGCTAAGATCCAAGGTGGCGTCTTCCCCGATGGCATTGACG  
CCGCGGATGGTTGAGACCGAATCGATGCGAAGATCTGCCGCCGATGGCGTTCCCAA  
GATGGTCCCAGGCGTCAATGGCGGGTGTGGCGCGTCCAGCGTGTTGGCTGCTTCTGC  
CAGGCAATGGACAGCCAGGGTCTCCATCTCTTCTTCCGTCGGCATGCGACGGTGCTC  
GATGAGGATGGCCGCCGCCATGCGCAGCCAGCTCGGGCGGCCATTCAACCAATCTT  
CCAGCGCCGTGGGCGCAGCGGCCCCGTCTTCTTCCGTCGGCATGGATCACATCCCTTGTG  
TTCGGCGGTGAGCCAGGAAGGCCCCCATCCCCCTTATTCAATGGTGACGCTGGTCAC  
GGCCCCGGGGCAAGTCGGCGTCTGTGCTTGGCGTCAGGACGGTCCTTCGGCGGAGGA  
AGATGTTTCAGTTCATTGGGGGATTTCGGAGAAGGATCTAGGCGTTGCCGCATCGAGG  
ATCGGTGCCAGCTCGCGATTCAATGCCCCGGGCTTCTGCCTTCAACTTGGCCCAGTCC  
CGGGACACCCTCAAGCCGTGCCGACGGACGGTGGCCAACCAGGCGTGCGTCCGAGG  
GCTGACTGTTTCGTCAGACGCCGCTTGGGTCCGAAGGCTGTCCAACGTGGCCAACTG  
GATTTCCAACAGGTTGATTTCCACCAGGGCCTGCATCTGCTCAGGAGCCATGGGGCG  
CGGTGGGCGTCGCTGGGACCACCAGTGCTTCAAACGATTCAACATGAGGGCTCTTCC  
TTGGGGCCGATGAATGCCGCTACTCTGGAGTCGGATCGACATCTACGCCATTGCTGA  
GCGCGTAGGCTCTGACCTTCGCCAGCAACTCACGTTGCTGGTCGGGGTTCAAGCGAG  
ACATCACCAGCAGCGTCTCGGCCATCAAATCGTTGGCAGCATGAAAATAGGCCACT

GGAAGACCCAGAGCTTCGGCCAGCTTTTCCATGCTTGCAGGATCCGGCACCCGATCG  
CCTCTCTCGTAACGAGAAATTCTGGGGGCAGCGGAGTTCTCCTCGTCCAACCCAAGC  
ACGGCCCCCAGGTCCGCTTGTGTCAGCCCCTTGGCAAGCCGGGCCTCGCGTAAGCGA  
CGACCGAACATATGAGCAGGGGCGAGAGGAGCAGGCATGGGAGATCAACGGATCC  
GTAACGACCCACAGTCTGCCGCTTCCAATGCTGCACTGCATTTGCCAAAATGGCAA  
ATGCGGCCAGGGCGGCCGCACACAGGGGGCGTGCATGAAGCTGGGGATAGGAGCA  
GTGACCATTGCGATTGCGGTGGCCAGTGGGACCGCTGGAGCTCAGGACGGCATCTT  
GGGACGGATTGGGAAAGGACTGATGCAAGCGGGTAAAGGCGCGGTGTCCGCGCCA  
GCGACGAAGCGTTACTTGGAGCCTGCAGGCACGTATTGGGACGACGGCGATCCCCC  
GGTTGTGGATGGCTACACCCGCGTTCGGTGGGGCCTTGCCGCCACGGCCTCTGGCGG  
ATTCGACCTCTGCGAAGGCAACCTGTTAGCTCAGGCCAAGGCGGGTTACGCCATGG  
CGCCATCGACACGCACCCGGTGCATTGGCAGTTGGCAGCACCTCTATCAGCGGCTTG  
GGCAGACCGGCGACCCAACGACCGCCTTCGACGCCAAGGCGCGCCAGTTCGCTGCC  
ACGGACCAAGTTTTACTTGCGCCCTCACATCGACGTGGAGATCGACCCGAAGACCGG  
GATCCTCCACGCCTATGCGAAGGTGTTTCGACAACGCCTGGTATCCGCACTCACCCGG  
ATTCCTACCCACTGCGGTGGTTCGGGGCATCTCCGCTGGGGAAGGGAACAGCCGTGG  
TCGGGGTGGAGCACGGAGGCCGCTACCACGCCGCCTTGCGCCTGAAGCCAGAAGAC  
GTGGCTGAACTGAACCGGGCGGGGCGAGACGCGACCGGGGACCGAATCTTTTTCAA  
AGTGCTGAAGGGTGGCCTTCAGCCCAACGGCTTGCCAGACATTGTGTTGCAGATCGA  
CCGCCTGGAGATCGGCTACAAGAGCCAGGTCATCGGCATCACCCCTCCAAAAACA  
AGGGCGCATGAAATGAGCCGAAAAATGAAGCTTGCCGTAGCGCTCACCGTGTTGGC  
CTTGGCGGGGTGTTTCGGGAGACAAGGGACCAACGAACCAAGACGCCGTCAAAGCG  
GTGGAGGCTTACTTCACCCAGCAAGGCAAGGAAGCGACGCTTCAGCGGACATGGCG  
CTTTGAGGTGACCGACGCAGGTGATCTGTCGCTGAAATGCGAGAAGAAGCCCAATG  
GCGACCACGCTTGCGACGTGTCGGGAATCGTCATCGGCTTGGGGCACTTGGGAGGG  
CAGCCCACAAGCCAGGAAGGAAAAGAAATGAAGGTGAAGATGCACGTCACCTTCC  
GACCGCAAGGCGAGGGGTGGCAGCCGGTGGAAAGTGAAAGACGAAGGGACGTCCGC  
AGGCTAAACGCCTGCACGCCATCGTCTTGACTGCACACGGGTTCGGATCAAGCGTGC  
AGCCAAGACCACCAGGGAGAGAAGATGATGACTGCTTACGCACCGCAGCCCCGCAT  
GATGGCCCCACCTGGGCCGTCTCAGATGATTCTGTGCTCGTCTGATCTTGGGCCCGTT  
GGGGCTTGTCGCACTGGCAGCGGGATTGGAAATCATGAAGCGCGATTTCTTCATAGG  
CCTGGTCTGCTGTGTGCCCGGTGTGCTCGTCTTTGCGTTCTTGGCCTTCTGCTTCGCC  
CTCCATGTTTCGAGCCCAGCGGCTTTGGGGCTGGCACGTCCAAACCGGCCGTGTGCCG  
ACGTTCCGCCCGCACGGCTTCCTGAAGGGGGCGGCGGTGGCACGTTGCTGGGCGG  
CGGCTTGGTGATGTCGGCGGCGTGGCTCGGCATGCGGTTGATGGAAGACCCGCTCTA  
TGGGACGTTTGCCAACTACGCTTTTTACGGAGCCTTCCTCTACGGATTGCCGGTGTG  
GTTGTAATGGCCGTGGTGGCCGGCTGGGCGAAGCGGGCGTGGGATCGCACCGCTGT  
TCCGGCGCTCTGATGCCTGATTCCTCACGCGACTGATAAGGGTCGGTTTTTCAGCGGG  
GTGACACCGACTACAACCGCTCTACCTCGATACGGTGCCGCAGGTGATCGTGGTGG  
GCTGTTTCGCCCAAGCCTTGCAAAGAAGTTCGTCGAGGAATGCAGTGGCTGAGTTGATT

GCCCATGCCGCACAATCGGGCGACAGAAACCTGGGGATGTAATGCACTGTTGTAGG  
CAGGAACTCGAAAGCCGCCTCCAGCCGTGACTGGAGCGGGCTGCCATAGAGGCGGT  
TTTCACCCACCATGTTTTTCAGTGCCTGCATCCAGCCAGTCGTGCTTGTAGTGGATGAG  
GCGGTTTTCGAAGGTCGATGACGGTCTGGGCGTCCATCCAAAGGGGATCGGTGTAGT  
CGAGCTGCTGAGCATTGGCGTCCTCCAGCAACTCATTGAGCCGCAACAAAGACGCA  
GGAACACCCTTGGCGCGGTTCCGAGGGTGCGCGTCGTTCTCGGCGACCTCGTTGGCA  
GTGGCGTCGATGAATGCCCCAGCAGAGATAACGGCAGCGGATACGTGAGCCTCGAG  
CGCGATCGCCATTTCTCTCCGTCCCATCTAGGGAAACTCTGAACAAAGCACAGCAGAT  
GCGCGACACTATGTGCCACAGAGTGAGGAGTCATCCATGCAACTGACGTTTCGGTGA  
CGCTGAGGGCCTGGGCAAGCGCAAGCAGACCCGGCGCGAGATTTTTCTGGCCGAGA  
TGGAGCAGGTGGTTCCGTGGCAGCAACTGCTCGGGCTGATCGCGCCG

>CONTIG\_56\_length\_7608\_cov\_11.877423

ATCCTCTTCCACAACCATCCTTCGGGCAATCCGGAGCCCAGCCAAGCCGACCGCCAA  
GTCACCGAACGCCTGAAGCAGGCGCTGGCGCTTCTCGACATCCGGGTCTTTGACCAC  
CTGGTCATTGGTGGCCAGCAGCACGTCAGCCTGGCCAGCAGGGGGTGGGCATAGCC  
CACCCCTTCACCTGCGCAGCCTGCCGACGCTAGACTGCCAAGGCAGATGCACTTCCA  
AGGAGCAGGAAATGAAGGCGTTTCACGTGCGCGGGATTGTGTAGGAGACCGACGGC  
AAGCGTCCCGCGTTGCCGATGGAAGCCACGGTCGAGTGCGCGAGCGAAGAAGACAT  
CGCAGATGCGCTTAGCGATGCTTACGGATGGCTGGTAAGTGACTTCGCAGTCGTAGA  
CGGTGCTGATGGTGCCAGTGATTTGAGAGCGTGATTCCATCCTGGGACGCACGCTAC  
GCCTGACGGTTAGACTCTGGTGGCAACGAAGGACATCGAGCACTCACGGAGGCTCA  
GCTTGCGCTTACTGATTCGCAGCATTGTGGTGCTTACCCTTTCGTTAGGAACGCTCGC  
CTGTGCTCAAGGACCGGCGAGTGACCACGCCTCTCAGGAGAAAACGATGGAAGGAC  
ATCCCCCAGCGCCGAGACGTGCGCTCCGAGCAAGACAAAGCCGCTGCTAGTGCG  
GACAGGGCCGCGAGACGAGGCCAGTCGGCAAGCCGCTCCCAATGCTGTGGTGTCAGG  
CGATTACCCACCACTGCCGCAAGGCCAGCACTAACGTCAGGTGCGTTGGTCGAGG  
CCATCGTTTGAATGGCCAAATCTTTCGAAACCAGAGCAGACATGGCCCCGGTGCAT  
GTTGCGCACGTGTCAGGGCTTGAGGTGACGCCAGACAGTCAAGGGCGGCGAACAGG  
GCTCCAGGGCACACTGGGTGCGGGGCACTACGAGTTCGCTGTGTGGAAGCCTTACG  
CGCGTCATCCCGGCCACACAATCGAGCTCACAGTGAGGCCTTCCGAGGCTTGCGACC  
TGTCGTTCAAATCGCTGCATGACCCATTGGTCGCAGGAGGGTTCGGCGTGACCAAGA  
ACGCGGTGGGCTTCAAGCCAACGGTCTACTTTGAGCGAGCACTCGCAGACGGGCTT  
GGCTTGTATGTAGTCGTACGACGACGACAAGCACGACGACCCACGTTGCGTTTTCGCGG  
GTCAAGCTCGAAATGGAGCCTCGCGATGGCTGATCAGCGCGACATTGACCGGTTGCT  
CCAGAACCTGGAGCAGCAGCCGGACCTCCCCAAAGGCGCAGTGCGTGACCTTCGAG  
AGGCCATCGATACATCGCCTTATTTGACTTCGGTGATGACGCAAGCCATCGACCTGG  
GCACCTTGCGCCGGCTGGAAGTGTCCAACCAGCCGAACGAGGGCGGGCACTACGAT  
GACAAGACTGGCACCATCAGCATCAATATCTCGATTTTCGAGCCATCCATTTCGTTCC  
GACCGCTTGGACATGTTGGCGGGAACGGTGGGGCATGAGACCGGGCATGCGCTGAT

GGCGCCGTCGGCGCAAGTTTCGCTGAACACTTTTGTGTTCAAGCTCGATGCCGCGCT  
CAAAGAGGGTATCCAATACGGCGAATCAGTGGTTGATGCCACGGGGCTGTCCAAGG  
AATTCGTTGCATCCGCTCGGCAAAACGAAGCCTTGGCCGAGTTGGTGAGTATGAATG  
CCGTGGCCAGCCGAGTGGCGACGACCACGGGGCAGTTCAACCAAGCCGAATTTCTG  
CGTCGCGTCGAGCCGACAACCGCTTGCGTGAAAGACGGAAAGCTTGAGCCGGGCAT  
CCACTTGGACGAGCGCGGATTTCAACGCACAGGGAACAGCATTTCCAGCCCGGCTG  
TGGAAGCCGTTGCCGTTTGTCACTTCGACCGAAGCGACAGCAGCATGGGGCGCCAG  
GGCACGTCTAACTACCCCGGCTACTATGTGGCCTACCCTGTGAGCGCGGGGGCTGCG  
TTGTTGAGAGAGCGTGCGGGATCCACGACCCAGGCCTTGCCGCGCCTCGGTTACGAC  
CTCGCAGAGTTAGGCACCGATACGGCCAAGCTGGAGGGAGCCGGGCTGAGCTTGGG  
CGGACAGGGCAAGGCGTTCGGATTCGTCGATACCTCCCACGGTCAGCAGCGGGAAG  
TGGAGGTGCGCCAATTGGGCCCAGCCCAGCATCGCCCGGACATTGAGCCATCCTCG  
CTTCGGTCACCTTCGCAAGTGCTGGCGGACAACCCCGCACACCCGGACCACTCGACC  
TATCAGCAGATCCACTCCTGGGTGCGCGGCACGGGAAACTGGAACGAAGAAGAGAC  
CAGGAATGTCTCAGCTGCGCTTTACAAGCAGCAGGTAGACGATCCGTTGCTCAAGCG  
GGTGGACCGGGTCACGGGAGGCTTGGGGAACGATGGCGCTCAGAACGTCGTTGCGA  
TTTATGCCCCACACGGGTTGGACAAAGCGCCGCAGTTCCATGCCACGTGGACGGTC  
GAGAAGCGTCTCAAGAGCCGGGCCAGCAGAACCTGCAGCAAGCTGAGGTCATCAAG  
CAAGATCAGGTGCGCCAACAGGCGTTGGAGCAGACACAGCAGCAAAGTCAGCAGC  
AGGAACAGGGGGCCGCGGATGACAATGGGGGGCCTGTGACCAACCTAGTGCACGCTA  
GCCAGTGCTGGCTACCCACGGCCTAGGGGCGCACGTATCCGGACTTCGTAGCCAAG  
CTCACGGATGGGCGCTTATTGGTTGTGGAATACAAGGGTGGTGACCGGGTGAGTAA  
CAAAGACAGCCAGGACAAAGCTCAGAGGGTCCACCTTTGGGCCAAGGCGCCTGCGG  
GTAAGGCAATCTACTAAAAAGAGCGATGACGGCTTGTCAGTGCGGCAGCAACTTGC  
CAGGGCTGTGAGCTAGCGATGGCGGCTGCCGGCGCCATGATCGCGTCTATTTTTCAT  
CGGAAGGATTCGGGGTCGAAATCATGAGAGTTGGGCGGCTGAAAATATCGAACTTC  
AGAGGCATCTCGCAAATTGACTGGTGGCCTGCGGGAACCGTCCTTTGCTGCCTAATC  
GGTCATGGGGACTCTACGAAATCTACAGTCCTCGATGCCATCGAGGCTGCCCTGTG  
TCGCGCTGGTTACGCTTTACGGAATCAGACTTTTACCTTTGCGATACGACTCAGTCCA  
TATGCATTGAAGTCACCATTGGGGAGCTTTCGAAGGCATTGCTGTCAGACGAACGCT  
TCGGGCTCTACATCCGCGGATGGGGCAACGATGGGCAGATTCATGACGAGCCAGAA  
GACGGAGACGAGCCTGTATTGACGGTGCGGTTGAGCGTCGATGCAACCATGGAACC  
GGTTTGGGAAATCATAAATGAACGCGCGAGCCACCCTCGCACCATTTCGAACCGTG  
ACCGCGCATTGTTTCGGCCTGGTGCGGTTGTCGGGCGATGACGCCCCGCCATTTGACTT  
GGGGCCAAGGCTCGGTCCTGTCCAAGCTGACAGACGATACTGACGAAGCAGCCAAG  
CATCTTGCTGATGCGTATCGCACAGCCAAAGCGAGCGCCAATCTGGGCGCCATTCCC  
GGCTTGGCAGACGCTTCTTTGCAGGGCCGAAACCCGCGCGAAGAGCATCGGTGCATA  
CGTGACCGGCTCTTACGGACCTGGGCTTGAGCTGGGCCGCGGTGGGTTCTCCTCTGG  
CTCCATTGCCTTACACGACGGCGCAGTTCCACTCAGGTTGGCGGGAATGGGGACCCG  
GCGCTTGGCGACACTTGCTATCCAACGCGCAGCTATTGGGGACGGTGCCATCATCCT

CGTTGACGAGATCGAGCAGGGACTGGAGCCACACCGAATATTGGGGGCGATCGTCC  
ACCTAAAGGCGGCTCAGGCGCAGGCAACCGCTGACGGGAGGGCTGTAGGGCAAGT  
GCTGATGACCACACACTCCGATGTTGCGTTGAGTGAGATGGCTCCAAGCTCACTCCA  
TGTCGTGCGGTCTTACCCTGCTCAAGGCGTGCGTGTCTTAAAGCCGCCCTCCGGCTC  
TGACTTCCACCGAATCCTTAAGAAGTCGCCGCGAGCACTCTTCGCTCGGCGCGTCTT  
GGTCTGTGAGGGAGAGACTGAACTGGGATTGATGCTGGGGATTTCGCGAGCTTTACC  
CATCTAGGCATGCCGGCGTTCCGATAGAGCAGCGTGGAGTCGCTATTGTTGACGGTT  
GTGGCACTGAGGCCCCATTTCCTTGCTGCGGGGTTTGGAGCGATGGGCTACCACACGG  
CGCTCTACCGCGACTCTGACGTGCCACTTGAGACCAATCAGGCCAAGTTGCTGGCGG  
AAAACTCGGTTGAGGTCATCACTTACGCAAGCGCGATCAACACGGAGCAAGCGCTG  
TTTCGCGCGATCAAAAATGATGAAGATATGGACTTCATTTTGCAGGTCGCACGGGAC  
GTAAAAGGGTTCAATGCTGTTAACGACCAACTGGCTAAGGCACTGCCAGAGCTCAC  
AGGCGTTAACTTCGCCGATCCCTTTCAAACGTGGAACCAGTTTGCTGAGGTTGCCAA  
CGACGACTTCATTGAGCGCCTAGCAGCCCTAGCTCGCAAAAATTCTTGTTCAAGAA  
CCGTCATGTAGCACGCTCTTTGGCGTCTCGAGTAGACACTATCGTTCGGCTGAATCC  
ATTGAACAACCTCGCACCTGTTTTAGCACGCCTTGAAAGCTGGATGTATGGTTGAGC  
CACTTGACCTGCTGGCTGTCCGGCGAGGAAGCATCGTAGCCCCTGCCGGGCACGGG  
AAGACGGAGCTGATTGCTCGAACGGCCGCGCTTGGTCAACGGACGCTAGTTCTGAC  
ACACACGCATGCCGGCGTGTCATGCGTTGAGGGCTCGGCTTAAGAAGGTGGGGGTTG  
CCCAACGGGCGTGCGTGGTAGACACCATCGCCGGCTGGGCTGCTCGCTACGCTGGC  
GCCTTTCCGGCCAAAGGCAAGCCGCCGAAGGGAATACCCGAAGGTGCTGAATGGAG  
CCAGGTCTACCGGGGAGGGAAGGATGTTCTATCCATATCGGGAGTCAGGAAAGTCG  
TTGAATCGTCCTACGATCGCATCTTGATAGATGAGTATCAGGACTGCGACGCGTTGC  
AACATGAGCTGGCCATCGCTTTGGCCAACATACTGCCGACCATCGTATTCGGCGACC  
CAATGCAGGGCATTTTTGAGTTCACCCGGTCAAGCGTTAGATGGCAAACCTCAAGTGT  
TTCCTAGCTTCCCCTTAGTCGCGATGTTGGAGGAGCCGATGCGATGGCGAGGCCACA  
ATGTGGAGCTGGGACTTTGGATAGCCAAGATCCGCGGACAACTGGAGCGAGGGCGAG  
CAGATTGACTTGCCGCAGGGCCAGCTACTTTCATGCCGTGCAAGGACGCCTATGAA  
ATGGAAGCGCTCTTCGATAGGTTTCGATGAGCGAGAGGGCTCAGCGGCGGCCATTCA  
CTGTAGGCGTGAGCATGCGACCAGCTGGCCAAGTCTTCGAAAGGCGCTTATCAATC  
GATTGAAGAAATAGGGGCTAGGCGCTTGCAGCAGTTTGCTGGTGAATGGGACGACG  
CAAGCTCACCGACGGCCAAAGTTGCTGCTTTGAAGAGCCTACTGAGCGACACAACCT  
ACAAGTAAGAAGCTAGAAGTCGGAGCTACCGATACTGAGGAAGATCTAGCAACGGG  
TGGCCGAGTGCGTGAGCGCTGGCAGCCTTGGGGACGTCGGGTAGCGCGGCGGATG  
CGGTGACCTACATTGAAGAGTTCCGTAAGCATTCGCCGGTTCGACCGTTTAGGGGGG  
AACTGCTTCGAGACACGGCGCGCGGTTGCGAGAGGTTGACGCTGCCCGGTTTCGAA  
TCGGTGCGCGATGCGGCTACTGCCGTCAGACAACGGGTGAGCACGTCGGGGCGCGG  
AATCCAGAAGAGAACTGTGTCAACCCCACTTTTGCTGAAAGGCCTTGAGTTCGACCA  
CGTTGTCATCCCTGATGCGGCCCACTTCGCCAATGAGACATTTGCCGCTGCAAAGTT  
GTTCTACGTCGCTATATCTCGGGCGAGAGAGTCGCTGACAATCTCGTCATCCAGCCG

ATACCTTACGTTTCCAGTGCCCAATACTTGAGCGAGAGTATTGCGACATAGATTTAC  
GCGCGACGGTCCCGGTCTGAGTAAATGGTGCCACGTCCTTGAGCGCGCTCACCGAC  
GAGACGTTTAGTTAAGAGGGCTCTAGTGAAGTGAGCCAATACGATTTTTTCATGTGGC  
TGGTGAGCAAGGTTTCAAGTTCCTTGTCATCGAGGGTTTGTGCGCCGGCTAAAAAA  
CTATGTCGGCCACGCGCTGCCGTCGTTGCGCTTCTTCACGCCTCGCGGTTTCTTGAGC  
TTTTGCTTCTCGCCGCTGGTTGGCTAAAAGTTCCTTTGCTTGCAGCTGAGCCAAGCGC  
TCGGTGGCTCGTTGGATTTGGTCTCGGTAGTGATTTTTTGCGGTCATGCGTTTCTCCT  
GTCCGTGGATATGAGTCAAGCAGGAAAATGGCTTGCCTCAAGTTTCGGGCGATCTCG  
AATTTTGCCCGGTGCGAAAATCGAAAAGATCTGAAAAACAAGGCTTGAAAGAAAGA  
AGCAAGAGCGCACTTAGGCAATGTCTTCGTCATTGCGTGCGCCAGGTGCTACGCCCC  
CGGACCCCCAAGCGCGACGCGCTTGCGCAAATCAAAGACAAGCCATAAAGAGCA  
GACTACATCCACTGCTCCGGAGCTCTATGGCGATCTATCACTCCCGTGTCAAACGT  
TTAGCCGCGCTCGTGGCGATTCTGCTGTGCGCCGCTGCCGCTTATCGAGGTGGGCTGC  
TGCTCATGGATCACCTCACGGGCCAGCGCCACGACTACCGCCGTCGCGGTGGTGTCTG  
TAGAAACCATGTGCTTGGTCCCTGAGAACGCACCTTCCTGGGCCCTCGTCCCCAGCG  
AGCTCTGGCCCGCGGCAGAGGCGGCAGAGAACCGAAAGAACTCAACCGTTGCCAGA  
GAGTTCGAGGTGGCGTTGCCCCACGAACTCAGTGACGAGCAGCGCTCAGAGCTGGC  
GACGGCCATCGCTCAGGCGCTGGTGTGCGGCTACGGTTTTGCTGTGCAGTCCAGCAT  
CCATTCCCCGGGTTCCCGGGACGGGTTGAACCACCACGTCCATCTGCTGGCCACCAC  
GCGTAGGTTGACCAGCGACGGCTTCGCCGATAAGACCAGAGAGTTAGATGGCGGAG  
CTTCCGGAAAAGTTGAAATCGAGTGGGTCCGCCAAACCATCGCGGCCACTATCAAT  
GCGCATCTGGCCGCTGCGGGCATTGATACGCAGGTAGACCATCGTCGGCTTGAGGTT  
CAAGCCGACGATGCTTTGGCTCGCGGCGAATGGGCTGAGGCGATGGTCTTGTCTCGC  
CAGCCCACGAAACACATGGGCAAGACATCCACGGCATTGACCCGCAAGGGAGTGAT  
GACTGAGCGTGCCGCCGAGAACGCGCGCATCGTTTCGAGAAAACGAAGAGGCCTTCG  
AACGGTTGCTTGCGCAAGCCGAGCAGGAGGGCATGGCAACTCTGGGCTCCGCTGGT  
CATAGCCACGACCAGGCACAGCGTGATCGTCGACGCAGGGTTGGCTCCACAAAAGA  
CCTTCCGTCTCTGTGCCGGGGTTGGAAATCCAAG

>CONTIG\_57\_length\_7270\_cov\_235.172057

CAATCCCGCTTGGAACCTGCACGGCATTGATACTCATCACGCCACCTCGTTGGCTTCA  
GGTGACAGCAGCATCCACCCAGCGCGGCGCAGATCCTGCGACAGGCGGCTGATGGT  
CAGGGCTAATCAGGAAAAAATATCCTTTAAAAACATCATATTAAACGATACTTATTT  
GACAATACCCTGAAAAATACCATGCCCAAGAAACGCAAAATTTCAACGAGGTGTAA  
TGAGCGCGGACTTACTCCGTTATCGAATGTATTCCAACGCCGATGCGATGCGACAGG  
CGGCATTGAGATCTGGACGAAAAGCTGACCGCCAGACACCTTCAGTTGAACAGGCA  
TAGGTTCCAACCTATAATAGATGTCGATTCTATCCACCTACTGCGTCGAGGGAGACA  
TTCGTATCGCTCTGCTCGCAGGCGCAAAGCTTGTGAGAAGGACAGACAACTGAATG  
GGCCGTAACCTGAGCGAGACCTTCGGAGCGCTTCCAGCAGACGAACAAGCAGCAAT  
CGAAGTCCGTTGCCAGAACCTCAACCAAGAGGTGGAAGGCCTGCGCGAGCTGCGGC

AGATCGCCGGCAAGGCCCAAGCCGAAATCGCGTTGGCCCTTAACATCAAGCAGCCC  
TCGGTCTCCCAGATCGAGAGACAGAACGACATGTACCTCTCGACACTTCGCAGCTAT  
GTCGAAGCTGTCGGCGGGGAATTGGAATTGACCGTCAAGCTACCGAAGCGGCCCCGC  
GCTTCGCATCCATCATCTGGGTGACGCTGCTCCCGCCATTGCCGCAAAAACCCCTGC  
GCTGCGGAAAAGCAATGCGCCATCGTCAAGGCGGCGCCATGGATGAATTGCAGAGG  
TCGATCTACGTTGACAGGTTCCGTTTGGCCTTCCATACCCAGAAGGGCACTGCCTTTC  
AAGACTGGTTTGTTCGAGTAGCCGGCTACGCCTTTGGCCCCGACTTCGAGGAGGTCC  
GGCCTTATGGCCCCCTATGGAGACCTGAAATGCGACGGACGCCGAATCAGCACGGGT  
TCGCTCTTCCAGTGCTATGCGCCCCGACTCCATGAAGGAAGCCGAACCTCATCACAAAA  
GTCGATGAGGATTTCCATGGAGCCCCGTGGCCACTGGGCAGGCAACATGCAGGAATG  
GGTCTTCGTCCATAATGACGCGCGAGGCCTGCCGCCTAACGCGGTCCAGCATTTGGA  
CGCGTTGCGCAAGGCCACGCTTCTCTCCAGATCGCGACATGGTCCGAGCCCCGAGTT  
GCTCACGCTCACTATGGGCTTAAACCTCTCGCAGCTTCAGGCCCTATTTCGGTCCTGC  
CGCATCGATCGCCATCGTCGACAGGCTGGTGATGTCCGACCTGATGCCAATCATCGA  
CGCGCTGCAGCGCCAGGAGCCCAATCCGGGCAACCCGCCGCTGACGCCGCCGTCAG  
CGGAGAAGCTGGAGAAGAACAACACTGTCGGAAGAGTCCGGTCTCTTCCTGCGCATT  
GGCCGCCGCAAGTCCAGCTTGGTCGACACCTTTTTCCGCAAGAGCCCGAGACCCGAT  
CTTGGCGAGCGCATTGCCGAGGCGTTCCGCCTGCGTTATACCGAACTCAAAGCGCTT  
GACCTTCCGGCCGACACGATCTTCAAGCATCTTCAGGACTATGCCGGTTTTAGCGGC  
GAGCCGAAGCGTCAGGGCGCGGCCCTGGCCGTGCTTGCCATTTCTTCGATAGCTGC  
GACATCTTCGAAGACCCAACCGTCACTGTGGAGGCGATATGATCCTTCCGACGAAG  
CATGTCAGACCGGATCGGGCTTTGATCGGCGTCGGCGCTGAGGTGCTCGACATCCTC  
AAACGCCCGATGACTATGTCGCGCCTGTGGGACGAGATTCGCGGACGTCGTTCCCTA  
CACGTCTCTAATGCGCCGATTGACTATCAGTGGTTCGTCTTTTCGCTGGACCTGCTCT  
ACACGATGGGCGCGCTCGACTTCGACCGCGGCTTGGTGCGGAGGATCCAGTCATGA  
TCCGGCGCTTTGGTAGTGACCTTACATCCTTCAAGACGCTGGCCTTCAGGCCCGGCC  
TGAACGTCCTACTCGCCGACAAGAGTGAAGGTGCGAACGACCGCCAGTCGCGAAAC  
GGTGCCGGCAAGACCAGCTTCATTGAGCTCGTCCACTTTCTCTTCGGCGCCGACGCC  
CGCAAGGACAGCATCTTTCGTTTCGGACGCACTCTCGCAGTGGACCTTCGACACCACC  
GTCGACATAGGCGGCGAGTTGGTCTCGGCGGCGCGCGGTGGGGCTAAGCCCAGCCG  
CATCTTTCTCAATGGAGCTGTCGAGAACTGGCCGATCCCACCCGAACCTGACCAGCG  
CACCGGGCTTCTGGATATCTCCAACGAGAACTGGAAGGCCAATCTTGGGCACCTCTG  
GTTTCGGAATGCCAATCTCCGCAGGTGACGAGGCCGACCGTTTCCAGCCTTCGTTCCG  
CTCCCTGTTTTCTTCTATTTTCGCGCGTTCGGCAGCTCAGCGGCGGCTTCCAGCAGCCGAT  
GCAGCATTCGAACAAGCAGCAACCGTGGGACCAGCAGGTCTCCATCTGCTATCTGCT  
CGGTCTCGACTGGAGCATCCCGGGCCGCTTTCAGGAACTAAGAGCCCAGGAGAAGG  
TCGCCAGGAGCTTCGCAAGGCCGCGCGCAGCGGCGACCTTGGCCGCTTCTTCGGCA  
AAGCCGCCGACCTGCGCACCCGTCTCACGATCGCCGAGGCTCGCGCCGAACGGCTG  
CGGGGTCAACTCGAAACGTTTCGAAGTCGTGCCTGAATACAAGGCGCTGGAGCGCGA  
AGCCAACGAGATCACACGCGAGGTCGACGCCTTCAACGTAGAGAACGTCCTTGACG

GTGACCTTCTTCAGCAATTGCGTGCCTCCCTCACGGAGGAAGATGCGCCTGGTCTTG  
GCGACGTGACTAAGCTTTATGCCGAGGCTGGCGTGGTGTTGCCGGATATGGTGCGGC  
GGCGCTTCGATGAGGTTGAACGCTTCCATCGGTCGATCATCGAAAATCGCCGAGCCC  
ATTTGAATGCCGAGATCGCGGCGGCCGAGGCGCGCGTCACCGAGCGTGATCAGCGC  
GTCGTCGCGCTTGACCGGCGCCGTCGCCAGATAATGAGCGTGCTGCGTTCCGGCGGC  
GCGCTCGAGCATTACACGAGCTTGCGCGAAGAGGCTGGACGCGCAGAGGCGGAAGT  
CGAGGGACTCCGCCAGCGACTGGAAACCGCTGAGCGCATTGAGAGCACCAAGGCCG  
AACTCAACATTGAGCGTGCCAGCCTCACAAAGGCGCTTCGTGACGACATCCATGAG  
CGCGCCGATGTCATCCGTGAAGCCATCCTCACATTCGAGGCCTTGTCGAGTCCCTT  
TACGAAAAGGCCGGCAGCCTGACGGTCTCCGAAACCGGAGGCGGCCCCCAGTTCGA  
GGTCCATATCGATGGGCAGCGAAGCAAGGGCATCACCAACATGCAGATATTCTGCT  
TCGATCTCATGTTGACCGAGATCAGCCTGCGGCATGGCCGCGGGCCGGGCTTCCTGA  
TCCACGACAGTCACCTGTTTCGATGGCGTTGACGAACGTCAGGTCGCCAAAGCCTTGC  
AGCTCGGTGCCGAGCGGGCCGAAGCCGCTGGCTTCCAATATATCGTGACGATGAAC  
TCGGATGTCTTGCCCCGGGAAGGCTTCCAGCGAGGCTTCGACATTGGCCAACATCTT  
ATGGAGGCCAAGCTCACAGATGCCACCGACACGGGAGGCGTTTTTCGGCCTTCGATT  
CGAGTAGGCTGCTGTATGCGATCCACACCGTTCACTAGACCAACGCTCATCGCCGCC  
ATCGAACTGCTGGAGCAGCACAGCCAGGCGCGTTTTCAACCAAGTCGTGCTGCGGCT  
CGGTCTTGAGGATGAAATAACCTCAAGCACCAGCCTTAGCGTAGCCAAGAAATGCG  
ATCTGCTCGGCCGCATTGTCGTGCAACGCGCCGAGGACGTCCTCCAGACTGTAGATG  
GCAGAATGAGCCTAGGCGAAGCCGTGATCCGGCAAGCCGCCAGTTGGCGCAACAG  
GATGCACCCCCCCCCCTGCAAACAGCCTTCGCGCGAGGCCTTTCCCGCGATGGATAC  
GTGCTCGTCTGGGATGACCACGGGCGCAACCCCTCTATTTCGCGCCGCCTTGCCCGAC  
GAGGTTCAACTCCCTGAAGCCGACGACGAGGTGCATCGTCTCCTAAAGTCGTTTCGGC  
TTCGCTACCCCGCTCGGCCATCTCGACCAGGCAGTTGAGGCTCACACGCGCGGCGAT  
TGGGCGGCCTGCAACAGTCAGCTCAGGACCTTCTTCGAAAGTCTGTTTGACGACATT  
GCCCCGAATATCTGCCCCGAGGAGGCCACCCAACGCCCAAGTTCCGAGAACCGGCG  
AGCACTACTGGCCGAAATCGGATTTCTTGCCGCCGACCGCAACGAGTGGACGCAAG  
ACGGAAGAAGTACATCAACGGTCTCTTCAAGATGCTCCACACCGAAGGCTCCCAT  
CCTGGTCTGTCCGACGAGGATCACAGCACCTTCCGGCTGCATGTCGTGCTCGTCACG  
GCCAGGACTTTCCTGCGCCGCCTGTCAAACGGTCGGTGAGAGCCCATGGCGTTCTTT  
TCGCAAGATCAATTGGAAGCGATCGCTGGCGCACTCGGCGACACCGCAGAGGGTCT  
GACCGGGCCAGAGATCGTACACCTGCTTGCGTCTTGCAAGATTGCCGATCCGGGGC  
ATATGACGAAGCGCATCCGCATCTATAACGCCTTCGCGGAATGCCAGAACACGAAA  
CGAAACCGCACCAACATCCTCGAGTTCATACGACAAGCCATGAAGCCGGCGCGTTA  
CAGCCGCGAGCCGCACCGCTATGAGCCTATGCGGGCTCGCCTAAACCTGGCGCTGG  
CATTCGAGGACTTGTGGTCGATGAGTCTGGCGCACTGGAGTCGGCAGATTTCGCCC  
AGACCCTGCCCCGAGGCACAGCGGCGGGCTCGAGACTTGCGAGCAGACCTTGAAGGT  
CGCGGCGTGACCCCTGACGTCCTGAAGTTCTGCCGCGCCGAGCTTCTTGCCGACAAT  
TACTTTCACGCAGTGCAAGAAGCGGTCAAAAGCGTAGCCGACAAGATGCGCACCCG

TACCGGCCTGACCGATGACGGAACCTACGCTCGTCGACCGTGTACTCTCTGGCCATCC  
GCCTCTTCTGGCGGTGAATTCCCTATCGACGGCCAGCGAACGCAGCGAGCAAAGCG  
GCTTCGCCAATCTGGTCCGCGGCACGTTCCGGCATGTTCCGCAATCCGACCGCCCATG  
AGGCCCCGAATACATTGGGCAATGTCCAAGGAAGACGCAGAAGATTTGTTGTTCGATC  
GTTTCGTTGATCCATCGGCGCCTTGACGCCGCCACATGCCTTCACGCGCATGATGA  
GCAAAGATTCGGAAGCTGTATGGAAGAGGACCTAGAACCCGATCACATTGGCCGCA  
TTGGCGAGCGTCAATTTCGAAATGCTCTGCGAACGCGCTGGCCTCATTTGCAACAAGA  
GCACTGTTCGATGTCATGGGCTGGGACTTCATCGTCGAGTTTCCAATGACGTCGGCCG  
GACTGCCATCGCTGCCCTCGATCAACGCCCCATCAATGCTGGCCGGGTTTACGCTAA  
AATCAACGCTCGGTCGCGCTAGAAACCGAATTCGCCTCAGCCTGTCGGCCATCGAGC  
GCCTGGCCAAGGATTCTCACCCAGCTCTCATCATCGTGTTCGAATGCGCGGGCGATG  
GGGAACCTCAATCCGCGTATCTCGTCCACCTTATCGGGAATGAACTCGCGCGGGTTC  
TCAAACGGTTGAGGAAGGCAGACGCCCCGCAAGGCGCACGACATCAATCACACCGAT  
ATCAGCTACGATTACGAAAAAGTCGGGTTGCGCTTTGAACCGACAGCAGCCGGCCT  
GTTGGCGGCCTTAAGTGCCGCATGCGGGCAAATCCTGGCGCTTACACAATCGAGA  
AGCAGCGGCAGCTCGTCGAACTTGGCTATGAGAACGGCCAATTTGAGGCTGAGGCA  
CTCATCCAGATCGACGGTCCCGAGCATTTCATAATCTTCTGCTCGGCCTTACGCCC  
CTTAAGCCGCAACGGCTTCGCGTGTTTGACAGTCGGTTCGGCATAACGCCTTCCATAC  
AAAGGCACGCTCTTCGACGACATCGAAGAGTTGCATCTCGTCCCTCCGACTCTGGGA  
CGTTGCGAAATATCGATCCGCGGGCGCAGCTTCGGGCAAGCGTCACGTTTCGATGCT  
GAAATGTTTATTGGGCCGCCTTTGGCGGCACTGGATGGACCAGAGCTTCTCATCCGC  
TCCTCTAACTTCATCGTCCGCTTGACACCAAGAGGTCTAAAGTTTGAAAGCGTCGGT  
TCAATCGATGATATGGAGCGTAGCCTTGAAGAGTGGGCAGAGTTGCTTCGCGCGCTC  
ACGCTTATGTCCACGGGGCGAGCGACTCTAACAATCAGTGGAAACGACCGAATTCC  
ACCAATTACCTTCCACGCCGATCAGTCCATCACAGGACCGTATCTTGAAGAACTTCC  
CCTCCTCTCCGCTTTTGCAGACGGGTGGCTACGTCTTCTCACGAAAGCCGGCATGCG  
TTCCACCGCCACCTTTCCGCTCAATGCTTTTTGGGAGGCGAATGAAGCACGGATGGC  
GGTGGACATCCTGCTTAACCCGCAACCTGAGGCCCGCTTTGAATTCGAATCTATAGA  
AATTGGAGAGGTCTTTCCTCCCTTGCAAGGGTTATATTTTAACATCGCGTCATTTGTA  
GATACCAGTATCGCTTTTACGCGCGAAGATTTTCTTAGTAAAGACTGAAGACCCGGAC  
TGGCAGTATCGGTCAACGCGTTTCGAGGCCCTGGATGTTTCGCCCCGGAGGTCAATGAC  
CTAGAAGAATATGGTATTGACCAAGCAAACGCCTCGGGCCTCAAATTGGTCATCAA  
CCCGAAAAACATCACACGGTATCCCATGCGGAACGCAAGCAGACGGTCCGTCCCT  
GAAGGTTTCAAGCGGCGCGAGTTTCTATAGACGCACTCGCGTAGCCAATGCGATGAT  
TAAGAGCGGCCAACAAAACCCAGGCGGATTCAACTCCGATTCGCAACGCTGTTGAG  
GACCTCCTCGGAGAAGACTTCGAGGGGCGTTTTAAATCCGAGTATCTTGCGCGGACG  
ATTGTAGAGTCGCTGTTTCGATCCATCGCAGGTGCGCATCGGTGATGGTGCTGAAATC  
GATGTGTCGTGGCAAGTACTGGCGCGTCAATCCGTTGGCATTTCGTTGCTGCCTCG  
CTGCCATGCGCAGTACGGATCTGC

>CONTIG\_58\_length\_7252\_cov\_13.926316

CGATTGGCATCACGGCACCAGCCGACGTCAAGGCGATGCTACCGGCAACCACCTGG  
CCGCAGCCGAGCAATTGCGATCTGAGCTGATTGCCTTAATCGCAAGCCCAAGGTTCA  
AGTGAAACTTGGGCTTGCCGCTAGTTGGCGTCATGGGCGATTGCGCAACTGTTGGGA  
TCCTCTTTGAAGCGGCAGAAGACCTCCTACGTCTTCCGCCTTTTGTGCTGGCTGCTTGC  
TAGCTTTCTTAATCGTCTTGGCCTTGGCGGCAAACCTTCGGGGGACTCAGGTCGAGGC  
CACGCACGGCAAGAAAAGCGTCGCTACCAAGCGTCGCCGCCAACTCTTGTGCTTCG  
CTGTTAAGGCGCCTGATCACCTCATCGAAACAGACTTCTTCGCCGGTGACCGGATCA  
TCCCAAGTCTTATTTCCCCTCCACGAGATCACCAGCGCACCCACGCGCCGCTGCTCG  
GGCAGGAGATATTTCTCCATAAGCTGCTCGCGAAGCGCCTTCTGGAAAGAAGCAATT  
GAGTATCTGTTCTCGCCGACTTTTAGTTTCGATAACGGCTTGGATTGACGGGTCGGAT  
TTTGACACCAGCCGGATGTCGGTTTCCTTCTCATCACCTGTCACCCCTCTTGTGCAA  
CGATGTAGCTATCACGAGCGAGGCGCTCAAATTCTGCCGATAGCGCCCGCCTCAGC  
AGTCGCTCCTCTTGGAAGCCACCCACGCCTCACGGGGCGAGACGTCCTGCCGAAG  
ATAATCTTCGATCTCATCAAGGCGACCGGCCAGCACATGGGCCATCTGCCAGCGCGT  
TCTGGGGGATATCTCGAAGTTTTTCTCGAGTTCTCTGACCTCGCGCTCAGTTAGCACC  
TCTGCGTCGAGTTCTTCCGCAAGTTTTTCTCGGCGGATCGCAATGATCCGGTCTCGAT  
AGCGAGAGACCTCAGGATCACCAGATAAGCTGATCTTAGCTCGCGAAGCGTCCTCT  
CCCTTCATCTCCATTAGGGCGTTGAATAAGCTTGATCGTGCATATTCCGCGTTCTCGC  
GGTTACCGACCGACCGGACGCCTTCGGCTGGGTCGTCGTCCTCGCTGCGCACATGGC  
GGTGTGTTAACCGTAGCAGCCTAAGGATGAGATCGGGCCTTCCGCTCATTGAGCTGA  
GACCAAGGCTTGCGTGGTGTCCGAAGAGCGCCCCAAGCCAATTGACTACTTTCGAGT  
GCCTGGCGGGAGTGATTGATCGGGAGAGCCGCTCCAATGTGTCAACGAACGCATCG  
GCATCCAAGCGACCCAAGATTGGCAACCAAAGGTCGACGTTCTTGGGATTGGGCCT  
GCCAGTCGTCGCAGCAATCGCTGCGTCCCGAAGAAGCGCGGTGTCTTCTGGCGACCC  
ATGCACGAGCAGGAAGTCAGCAGCATTTCCCATGTTGCGCCGCTGGACATCAGTTAG  
ACGCGTCTTTACAGCGGCCCTGTGCGCCCAAGCTCGAACCCGGGGCAATAGGAGAT  
GCGCCACTGGCTCGGTGCTGCGCCTTATGTATTGCAGGAGCATGCCGTGCGGGTCAG  
CCCCCTTCCCAAGGTCTTCTGACAGCTCACGTCCGATTACAGAGTCTACGGCGGCGG  
GATGCCGGGTCGCGAGCTGCTCAAGCCAGGGCGGGAGCCGATTGAGTTCCAAGAGC  
GCGTATCGGCAGGCTAACTTAACCTCCCCAGCGCTTAGCCTGGCCGCCAGGCAGG  
ATCTTCCGCCTCGGCATAGATAACCCGCCAGCCCCATCTCCCAAATAACCAGTGTGGT  
GTTCTTTTTTTTCTCATCGCGCTCAGAGCGAAGCGTAGGTCTCTCACGGCGCCAAGC  
CGCAGCAAACACCTTCTGGAAGCGGTCTGCGAGATCCTTGCTCAGCATCCTCTCGAT  
GAAACCGCGATTCCATCCAGCCTGCGAGTGCGCACTGCGCTCGTTTCTCATGACTTT  
CCAGAAATCCCATAACGTGCCCTCAACGCGAGCATCCGAAAAAGCCACGTCAGGGC  
TGCCGCACAGTTCACGATGGAATTGTCGCCAACTCGCGGTGCTCTTCGCGTGCTTCC  
GGCGATTAATTTCCATCCGCTCAGCGTTCTTTCTCTCCCATTCAGTTTCGCGGGG  
GGCAAGATACGCAATTCGGAAGGCTTCAACCCTTGGCTCCAAGTTGTGCGCGCCGG  
CAGCCGTTGCGCTTAGTTGAGCAATCCACCTGTCAGGATCGGACTTGTGCGGCGTCC  
ACTCGATTGCAACTTCCAAAGCGAATGCACGCTCGCCAGACCTTCTTTGAGGATCCG

CAATCGCCGCCAACACCCACGGCTCGTCGTGCTGCAAAACGGGTGGTAGCCACCCT  
GCCATTGCAAGTGATGTAGCCGAGACTGTGTGCTTCGCTCATTTTTTGGGTGGTATTT  
ACGCGCGATGGCATCTTGTGCCCAGAAAACGCCAGAGCGAACCGAGTCGGGCGACT  
CACTCAGAACGGCTCGCAGGCCCTTGACATCGCCCCTAGTTTCATAGTCATCGACCG  
TAAGCAAGAGCGATAGCGCAATGCCCTTTACCAATACCGCATCGCACCGATGATCA  
CTTAGGCGCCGCAAGCAGACTGCCAACAGCGCGGGAACCAGATCCTGGCGCTTTGA  
TTGCAACCGATAGAGGGACCTATCCCAGGTCAGTCCCGCATTGACCAGAGCAGATA  
TCTGCTTCTGCATCAATAGAAGCTTATCGGCATCGAAGGGAGAGCGCTCCACGACAT  
TGGTGAAGTAAGTGATTGGTCCCGAGTAGGTTCTGCTTTTCGAGCCTTGCCTTGCGA  
AGATCTTCATCAGTTGCTCGGGAGACATTTGACTCGGAAAGAACTCAATCACGGCGC  
GCTGGACAAGAAGGGGTGGACAATCAGGCACACCGGAAGCGATCTCATCGAGGAGT  
GCTGGCAGTCGAGAATCATCGAGCCGCGATAGCGCTGCCAGGGCGCTGATACGACT  
TCCAATCTCGGCTAGCGCATCCACCGCAACTTCATGGGCCAGATCGGCATTTCCCTT  
CATTTGTCCCCAGCCGATCAGCCCTAGCAAGGTGTCTCGAACTTCTGGGTTTTCAAT  
ACCAACCTTCCAGAGGCACGCCACATCTGCGGTGAAATCTTTCGACGCGAAACGTT  
GACTTGAGGGCTAGGCACGGCCTGGCCTCGCCACCCGCCCTTTCCAAAGCGGCGGA  
CATAGCCTTCAAGTGCCGCGCGGCGAAGGGGCACATCGAGCGACTCAGGGTCTCCT  
GCGTGGAGAAGCAGTTCGGGTTCGTGCGTGATGACTTCTCCACGTATGAAGGCGTCA  
TGCGGAGCTAGCCACGCCACCAAAGGCCGCATTGCTGGCTTTACGATGCGCTCACCC  
TCCTGCGTGTCTGCGAAGAGCAGCCGCGCAACTTCGCGATCTGGAAGCCCCTTTTCT  
CTAAGTTGGCGAAGTCGCTCTGCGGCCAAGAATTTCGATGGCAGATCGGTGGTAGAA  
GCGCACACGGCCGTAATTGGCGAACCCGAAAAGCCCACGTTTCGAGCAGGGTATCAA  
GCTGATCGCCCGTCCAGTCGGGGAGCACTTCGGCGGGACCAAGCGCGCCGTCTCCC  
GAGGCGCGGTCTCCCCCTGGCCATGCCAGATGTTGAACTTTCGACCTAAGAGAGCA  
GCGAACGCAAGCCTTGACGCGCCTTCGCGTGCCTTGATGGGCTCCAGTGAGACACG  
CTCATCGCGGTCTTTGTTTCGGGCGCAACCTGATCTCAATTGCCGTATCCACCTGTTTCG  
CGGTGCGAGCGGATGTAGCCGTTCTCTTTCCAGTCACCACACAACCTCAAGGAAGTCC  
AGCGGCCTGCGCGCGAAGTCGTGTGCGTTTTGCGAACTGATTGCCTCAAATAACCTG  
TCTAGATCCGTGACACCAGCGGTCTTCGCCATTTCCCGCATTTGCTTCTCACGGAGC  
GGCGCGAGAGCGACATTTCTCCACGTCGGGGCCTTACCTTCTTGGTTTTCTGGCTTCT  
TCTCGCGCATCGCAACACTCGCGAAGGCGACCTCTGGATCCATCTGTGCTTCGACCA  
CCGGGACCGGGAGATGCTTGGCAATGACCTCGCGATCCACCGGAATAGGCCGGGTG  
GTAATCACGATCGTGACTCGTCCCAGATGCCCCGCAAGTGATCTAGCGACGGACTTG  
ATTGCGCGATCAAAGCTTGAAAGCGTCAGCTTCAACTCATCGATCGAGTCAAGAAA  
GAAGATCGCGTGCTCTGTCTGGGCCGACTTCCAACATCGAAGCGAGCTTGCTCCTC  
TGGGGAGAAGCCATCTTCGATTGAACGCGAAGCAAGCGCGGACAACCTCCACAAAGA  
AGGCGGCTCGTCCCTCGTTCCACAGAGACTCTGCCGTTCTCTTGCACTCAAACGTCTT  
GCCCATTCGGGCTTCGGACACGATCAACACCCGATCGGATTCCAACAGAGTTGCCCA  
ATCGATCTTGGCGCCGCTTGGAAAATTGGCCAGGAATTCGGCAGCTTCCATGCTGTC  
AAACTTATCGTCCGGTAGATCGAAGAATGAGCGAGCGACGGATGTGTGCGCAATTG

CCATGTGGTTAAGGGTTCCTTCGTTGCTTCCATCTTCGAGCGCCGGGCGGGCGAGT  
CAGCTAAGCCGGATGGTCTTGGTCCTGAGCTAAGATAGAACTTGGGCGCTGAGAAG  
GCCATCGGCCAATCATGCTTAAGGCAGCAAGTGGGGGGTGAACGACTACATCGTCT  
TGGTCGCTGACTTGGAAGAACTCGTTGGCTCAGACGGTGTCAACATCCCCGCATCGC  
TAGAGCGTGTTATGAACTTTGAAAGAGCGTAGCTGCATTTCCAAGCCTCGCAGCTCA  
CTGGCTGAGGGAAACAATGCAGTGGCGCCAGGCTTGGTAGGTGGTGGGCACAACAT  
GGGCTTGCCTCCGGGCTCCGGCTCTGACCCCAAGTGTTTCGAAAGAGCGCCGCCT  
ATTATTATGTTATAATATAATTAATTTGCTTTTATTGCCTGACTTGTCTTTCAAGCTTC  
AAGACTCATTGGCACTTAGGTGCTGACAGCGCACCATTTTCGCTGACAGACGCTTAGC  
CACGCCTACTTCTCGATCCTTAGATGAGTGCGGCTAACGATCGCCTCAGGGAAGCAT  
CGCAGAAGGATGATGCGATCAAGATTTGGAAGCTCAAAGGTCGCCTGATTTCAAGC  
GATCAATAGCCTATTGACGCTTGTGGGCTGTTTCGAAATGCTTGGACTAGGCGCTC  
ACAATCAGACCAGACGAGCTGTCCTAAATTCACGCTAATTCCGCCCCAACATACCT  
AAGAAGGATCCGATTCAATGCCGGCTAAGGAAAGAGACAGCGCCACACTGTCGTAT  
GAGAAGCGGTTTCATCCTATTTCTGGACTTCCTTGGCTTCAAGCAAATCATCAAGGAG  
ACGACCGCTGATCCGAAGCGCATCAGCGCAGTCATCGACGCCATCGACATCATTAA  
TGAAATGGGCGGGAAGAGCGGTCTGCACAAGTCCAAGATGCTCACTCAGTTCTCCG  
ACTCAATCGTCATCTCGTATCGCTGCGACGAACCGTCTGCTGCGTTTGACCTTGTGA  
GCGAGATCGGTTTTGCGCTCGTGAGACTGATCGAGCGCGGCTTCCTGGTTCGGGGCG  
CTGTGCGCCATAGGCGACCTCATCCATACGGAAAAATACCTACTCGGCCCCGGCCATGG  
TTGAGGCATACGAGCTGGAATCAAAGCACGCCATTTTCCGAGAGTCCTCGTCAGTC  
AGGGACTGCTTGATGTGCGCCAGAGACGCGCCCCGCCTCGCATCACGATGGCGAGGAA  
GAAGCCAACTATATTTCCAGCTATATGAAAAAAGATGCAGATGGGCGCTACTACATT  
GACTACCTGAGTTGGAACGCCGTCGTTGACACCATCGGCGGAAAGGATCACCTGTTT  
CCGGAATACCTTAGAAGAGTGGCCAACTTCTCGAAGTTGGTTTGAAATGTGAGAA  
CGAAGGCGTAAGAAGCAAATACAACCTGGATCTACGAACAATACCTTGATCAGGTAA  
AAAATATTCGAAATTTACCCGATGATCACAAATGGGTTATCAGTAATCCGGACCTTC  
ATCACGACATCAAGAAGCTCCCGCTGAGCTTCTAGTTGATTTGGCTCCTCGCGCTTG  
GGCGTGCCACGCCAGCCTCTCTTCCTTTACGGAAGGAAGGAAGAGTTGGGAGAACG  
ATCAGCCATTGGATCATGGACACTAAGCCAAGCGCTTAGCCACAGCGAGATAAGAA  
GATGGCTGATCGACTCTCCTCTTTGCCCAAGCAAGCGCAGACCGAAAGCAGGCATC  
GTCTCATCTAAGCGCTCATAGTCCTTTCTGCTCAACCCCTTAACCGCCCCGGGAAT  
CGCGGAGGCTGTTGATCTAAGTCAGGCCGCTACCGCAATTGCAGGGACTGAACAAC  
TAGCAAAGCGAGGTGGAGCGTCTCTTGCGCGTGCCACCCCTCAAATTTGAAAGGTG  
ATCAAGTCGTTCAAGCTTACCGAGCACGGGCGGCTGTATCCCTGGAAATTGCGCATC  
ATTTTTCGCCTCACCATCGCTGTGTGACTGAGCCACTGTGTTTCAGCGGGACTCAGCC  
CTTAGAACTTCAAGCTCCCAGTTCCGCATCGCCTCTGCCCTTGCCCTTGCCATAGCGAAGCTCG  
CGCAACACCTTAGCTGCGGCCTCCCCAGCTCACAGGCCAAGTCCTGCTCGCCAAGG  
TCCCCCATCACCTGCTCCCAGAAGCCAGCAGCACGCAAAAGCCTAGACGCGGCCC  
GATGACTGAGCGGCGGCGTGAGCCCCGAGGGAGCGATATTGGGAACGACCGGTTGTG

GCGTAGGTCTTGGATCCAGAATTTTCGGCCAAGGCTTCAAGTGGCATCTGGATCAATC  
CGTCGATCTTGCAGACACCCGGATAGCGCCCCGACTGCATGCCTTCGCGCACGCGTT  
GCACGACCCCTCTCGTGCTTTGGCCACGAAGCACATGCGCGACCTCTTCGGGCGCAA  
GTGCATATCGCTGCGGATACAACCTCTCTAAGCGTTTGAAGCGCGCTTGCAGACATGT  
GCGATGGGCCATCCCTAGACTCACTACAACCTGTCTTATAGCGCAGCCTAGGACACCT  
TGGAAGCCGTGGCAATGCTGTGGCGAACAAGCGCTGTTAGAAGCTGCTTTAGGTTGT  
CTAGACCTGCGTCGCGCCCATTTAGTGGTCAGCCGTAGGCCTTATGAAACAGTAGGT  
TAGACAAGATAGCGGTGACCCCTCAATTTCCCCTCTTCCTTAGG

>CONTIG\_59\_length\_7156\_cov\_73.058757

TAGCGCAACAGCGCCAAGCGGTGAAGGCCAAGGAAACGCAGCGTCGCGAAGAGAC  
CAAGCGGCGCACGCGAGTAGCAGAACTCGTGTTCTTGCAGGAGCAGAATCGCTGG  
AGGATGCCGAGTTGGTGGGTGCGCTTTTTGCTCACGTAGGAAATCGGAGCGACGCG  
GTAATCCGTAACCAAGCGCGCTCCCTCGGCGCGTTGCGAATGGAAATCTCGAACGCT  
GAAGAAGGTCACAGCACGCATTGAGCCTGCTCGCCCGCCCTGCCCATCGCGCGCCA  
AAGAGTTGCAGTCGCACCGATGGTCGGTTACAACGTGTTTGCCAGTGGGGGCATCCC  
CCCGGTGTTGTGCCCCGATAGCCTCTAGGCTCCGGTCCGGAGCCCTCTATGAGCAAC  
AAGCGCCTCAAATCTCTTCGCATCCGTGCCTTTCACGCCCAGTCGGGCTGCTGTTTCT  
ATTACGGCCTCCAGATGTGGCTCGCCTCGCCTAACGAGCTGGGCTTACGCCCCCGTT  
CGGCACGTCCAATCTCCTCGGGGTAGGGAATTGGACTCCAAACTAGATCGCTACTCA  
GAATTGGGTGGACGTCGATAGACGCGCCTCCGCTGGCGAGGTCCCGATAGAGCATC  
CCCGAGCCTCTCACCAGCAATGGAACGAGATAACATGCTCGGAGGGCGGGCTATCC  
CCAGGCTGCTCACTTCAGGGGGCAGCGGAGGAATTTGATCGCTGATGGCCTAAGTTC  
ACGAGTGGGGATGAAACTCCGATTCCGGGGCGAAAAAGCTACATCCATCCGCGACCC  
GTGTCTGGCCACCAACCCGCCACTGTCCTGTCTTCCGAACGCTTGATGGAGGTCCTC  
CATGGATGCGCGCCACGCCTTCAACAAGCACTGCGCAGCCACAGCCTGTATGAAAG  
ATCGAGTTGCTAATGACATGCGTACCTAACATCGCAACGCAGCCGCCAGCGTATGT  
GCCCGACCTTGGCATCGGCACTCTCCCCTAATCCGCATTAAGACCCAACTCACATCC  
GGATACGCCATAGTCGACGAAGATTGACAGCTGGGCACCTTGATTTATCGGTCTTGG  
CGGGCAGATTGAGTGGCGTACTGTGGCGGTGGACCCAGCACGATCAAACGCAATGC  
CCCACGCCAAAACTTAACCATTCACAATTTGCGCAACCACATGACTTGCGCGTAAT  
ATTCATTGGTGTAATGATATGGACATCCCTAAAAGTAAGCGCTTGCAAGAGTTTCT  
TTCCCGTTTGGCTTCCGCTTCGCCTGTTAACAGTCATGCCGAGGCACTGCTACTGGTC  
GCCCAGATCCTAAATGATGTGGAACGAATTTACGTCCATACCCTACAACCCGAG  
CGCGTGGCATGAAGACAATCGGATGTATCCACCGCAGCCGGACAACGCACGAGATG  
AGGGAGAAGGGCTGACACGCTATCGCAGCAAGGGGCACAACACGCTGATTCACTCA  
AGCGGTGCGATCCGATTAGATACCATAGGTGGCATATGTCTACTCAACAAAGCAGCT  
CAAAACGGGCATTTTCATCTAGCGGGCTCGGAACTTCCAGCGCCTATGGCGGAACTG  
GTGAGTGGACTTCAGCTTGCGCTTCTCAAGCCATCATTAAGTCGACCGTCCCCGA  
GACCCAGACGGCGAATGGTTTGTGACTTGGAAGACGGCGCATTCAGGCCCCGATT

GCTTGGCGAACCAGCTTCGGTTTTGGGCTATTCACGTCAACAGAAGGGTTTGGCGAC  
CGGCTTAGCGAAATATTCAAGACGGCCGAACACGCGGTCATGAGACTGCTGCAGAT  
ACGTCAGGACTGGGAGAAGTCTCACTCCATCCAGCCTGTGACGCTCGGTCAGCTTCG  
ACAAC TGACGGGCATGCAACAGGCAGACATCGCCGAAGCATTGGATCTTAATCAAC  
CAGCAATATCGCGCTTTGAAAAGAGAGACGACGTAAAGATCAGCACGCTTACCTCA  
TATCTAGAAGCGATGGGCGGTCGCTTGGATATTCGCGCCCATTTTAATGAACTTGGC  
ATCTCCGTGGATCTGCACACATACGCCCACCCAGAGATGAGCACGCATGAGCGTTT  
TAAGCCTAGTGGTTCTTAGAGCAGAGAATCCACGCCAGCTAGCCGAATTCTACGCAG  
GGCTGGGCATGTCAATTTATTGAGGAACAGCATGGCAACGGCCCGGTTTCATCATGCCA  
GTCGCGTTGGTCATACAGTGTTTCGAAATTTACCCGGCAGGCGAAAAAGAAGAGCGA  
ACAACGGGGACACGGATCGGATTCCAGGTGCCGTCCATCGAACAAGCTATCACCGC  
TTGCTCGGCCCCGGGTCTTAGGTCATCCCAAGATGACCGCCTGGGGTAGGCGTGCCGT  
TATCCAAGATCCAGAAGGACACAAGGTTCGAGCTCGTAGAAGCCGCCGTGGAAAGCG  
AGCCCGCCAGTCAGGCCCTATAAGCCACTCTGCACAGCTGAGAGGGTGATGCAGCG  
CGGCTTCCCTAAAGGGTCGTACGTGGACCTTGCTCCTGCTGCGCTGTCTGCTGCTGA  
GTCTGTTCCAGCGCCCGTTGACGCACCTGATCTTGCTTGATGACCTCCGCCTGCTGCA  
GATTCTGCTGGGCGGGCTGCTGGGAGGCCTCGCGCCCGTCCACGTGAGCATGGAAG  
AACGGCCCCTTGTTCCCCGAAGGGCGCATAGACCGCGAAGACGTTATGCGCGCCATT  
GTCTCCCAGGCCTCCGGTCACCCGGTCGACCCGTTGCAACAGCGAATCTTCGGCTTG  
CTGCTTGTTAGAGCGACGCCGATACGTTGCGGCTCTCCTCGTCGTTCCAGTTGCCCGT  
GCCCCGAACCCAGGAATGAATCTGATGGTAGGTGGAGTGGTCCGGGTGCGCGGGGT  
TGTCGGCCAGCATGGCTTCGTTGCGCGCGACGGCTTGGGGTTCGATGTCTGGTTGGC  
CGGCGCCGCCTTTCCCGATCTGCCGCACCTCCGTGGGACGTAGCTGCCCGTCGGAGG  
TGTCGGTGAATCCGAATGCTTTCCCTTGCCCTCCCAGTCCAATGCCGGCCGCCTGGA  
TCTCTTCCACCGAACTACCAAGCTCCTTTAGGTTGAGGCCAAGGCTAGGAATCGACT  
GGCTGGAGGCACTATCTAAGTCACGGGATACGGCGGCCCCGGCAGACACAACGTAA  
GACAAGTAAAAGGCGTTGTAGTCGGACTGCCCTAACGCGCCCAAGCCTTTGCCGGA  
CTGATCGAACTGACAAATCGCCACGGCTTTTACCGCAGGGCTGTCGATGCGGTTGTC  
GGTGTGCTGGATGCCCTGGACATCCATCTGGATGCCTGGAGCCAGCCGCCCATTCGT  
GACGCAGGGGGTGGTCGGGTCAAGGCGATAAAGCAGTTCTGCTTCGCTGACGTTGC  
TGTCTTGGTGCTTGACCCGACTGGCCACCGAATTCATCGATACCATTTTCGGCGAGCG  
CTTCGTTCTGCCTGGAAGCGTTGATGTAGTCCTTTGCCAACGGAGTGATGTCCACCG  
TCGCATCGCCGTAGCGTGCGCCCTCTTTGAGCGCCTCATCGATTCCGGTAGGAAAGTT  
TGTAGGTGCTGAGGTCGTTGGAGCGGGCCATCAGAGCATGTCCCGTTTCGTGCCCCA  
GGACTCCGGTGAGCTGATCTATCCGCTCTGACCGGGTCGGTCGCTGCAACACGTCGG  
CGTTGACGCTGATCGTCTTTTCGGCATGGTTATAGTGCCACCTTCATTGGGCGTGTG  
AGCGAACCTGATGTGCTCAAGGTCGCCGTTGTCGATGGCTTTGGTCATCACCTCAAC  
CAGGTAAGGAGAGGACTCCACCGCTTCGCGGAGGTCCTTGGCTGCACCTGGGGACA  
GAGACGACTGTTGTTTCGGTCTCCTGGAGCATGCGATCAATGCGAGGGTCAAGCATCG  
CTGCGCTCCATCTCAAAGACAACGACCGTCACGCAGGTCGGCGCGTCCCTTTTGTCT

GGGGTAACCGCAATGTAGAGCCCCAGCGACGGGCTGACGATCTTGTGGAAGGTGAT  
TCGCTGGTCGTCGCCAAACGTGGGCACATACACCTGGAACCCTTCGACTTCCATCTG  
TTTCTTCAGCGCCTCATAGGCTAGGCAGGCGTTCCGGGTGAGTGTGAGTTCCACCCG  
GTGCCCTAGGAGCTTGGGCGACCCTTTCACACGGCCCACTCGTAAGTGCCCTGCCC  
CACCTTACCCGCCACCCCTCTGCGCTCATGCTTTGCGTCAGGAGGGAGTGCGATGCC  
CAACACGTGCTCCACATTGGCGGGGTCGGAGTCTGCTTGAGTGTGAAAGGACTGGG  
CGAGCGCTCTGATCTGCTTCAGAAGCTGTTCCGGGGTGTGCTCTGCCCCTGGTTGTA  
ACGCGGGATAGCCGTCCCAGGTCATCATTGGCGCCGAAGACTCAGGGGCGCGGCA  
TCGACAAGTGCCGCGACGCGGTCCTGCTCGCGCGGAACGTCAGCCGAGGTCGGTTC  
CTTCATGGTTTTCTCCTGATGGGCTTTTGATGGCTCGGCGCATGCGGCCACTCCTAAC  
AGCAGTGTGCTGTTGAAAGGGCTTTGGCGATGCGCCTTCCTTGACTAAGAATATCC  
ATGGCCCACTCACGTTTTGGGAGGTAGACAGCTTACCGCCAGCGCCTTAGCTCAG  
GCCAAGCAGGTAGGCAGAGGGGCTATGCCACCCCCCTGGACGCCAAGCTGGTGTGC  
TGCCGAGCACCAATGGTCGAAAACTCGGATGTGAGGAGCGCCCGCGCCTGCTGCA  
GACGCTCGGCTCCGGATTTCCCGAAGGGTGGTAGCCCCCTAGGAGCTACAAGCCTCT  
TGCTCCGATTTTGGAATGTCAGCATTCCATCCACTCTAGCCAACCAGAAAAGCGCTC  
AAGTGTTTCATTGTCTAGCTGTTCTCGAATTACGCGCCCTTCGCTAACTTCGACAAAA  
AATCGGTGAGCAAGCAGAGGCTTGGAGAGCTTGGCAGCTTCACACGCTTGGAATT  
TGTGACCCCAAGTGCCCAGCTTATGCCCAGAGGCAACTACTTCTGCAAAATCCTTTC  
GGAGAAAGCATCTTCAATCCCGGCACATCCTTTGAATAGGAGAATCCGCTTCTTGAA  
ATCGTCCGCATTTAGCTGCCACTTATCGCGCATCTGGCGAGCCACCCTCTTACCCTTA  
TCGTCTTCGTCAAGAGCCGCTTTAAAATCTAATCGCCAAGCTGTAAGCAAGTCAGCC  
ACTACTTTTACGTTGTCGGCTCCATTACACGCCACCAGCGACAACCTCCCGGCCTTTTC  
CTGTCAAAATTACAAGCGCTAAAAAATAGAAATAGGCACTATTTTCCTCTAGAAGA  
ATGTTTCCTTTCGCTGAATCAGCTGTTGCGTAGAGAGGTCTGTTCCCATACCGCCA  
AAACCGGTGCCAAAGTCAGCTGTGAGGACGCAGCTAGCGCCAATCCAGTCCTGACG  
ATTGTATTACTGTCTTCATCGTCCACATCACGTTCAACGGCCAGTATTCTATCGATAC  
GCTTATGATCAATGAGGTATGGAAGTGTGAGTACTGTAAAGCACTGGTATTGAACCAC  
CAAGATTTTCGATGAGTCGCAACACATCTTCCTGGGCAGTTGCATGCAGGTATGCGC  
CAGGCTCGTCGAGCAACAAGACGATGGTGTACCATCCTTCTGCGACGCGGTCAGA  
TGAAGAAAGAAGGCGACATACCACCGTGTCCCCTTGCTCCGTTGAGACGGGTGCAA  
CTTCTCGCCTTCACCCTCAGAAATCCAGAAGCGCAAGTAGGCAGCACCCAGCACGCA  
CATGAGATGGCGGATGCCGAGCGAACTCAACCTCTATCTTTATCTTTCCTCGTTGTCC  
CAAGACCTGCCGCCAGTAATCTGCGAGACGGCTATTAACGAGGCGCACGCCGGCTG  
ACAATACGGAAGCTCGTTCTCTATCATCTTCTACGAGCAACTCTTTCAACGTGATTCC  
AGCGCTGACCAAGAAGTTATCTGCGCCCCGATGCTCGCTCCCTTCGAGCCATTCTTT  
ACTGGACTCGTCTATATCTACAGTATTGGGAAGATAGGAATTCTCCTCCCTAAACAG  
CACAAACAGCGGCAGCTTTTGCCAAAGGGTCTTGCGAAAAGTCGCAACGATAGCTG  
AAACAAACGGCTTTTCCTCAACCTTAGCATCGTCTGCAGTAATAGCCGGCATTGAGG  
CGATAATCGCAGCCTCGATCAGCTTCTGCAGATCCGGTTCGAGCCGGAACACGCGCT

TGAAGTCGTCTGCAGTACCGCGAACGAACCGCGATATGAAAACAATATCTTCTCGCC  
GGCCTATAAGCTTCTTAGCAACTGCGTCTGCATACTCTCCAGGCAACTCGGCACACA  
CCTCAGCCAACTCTTCCTCGGTGAGCAGAAGTCGAAGAGCGGCTGCAGAGAGCCCC  
CCGCTGCGACGAAAATCATCTGAGCTCACTGTGCCCTCTGAGCCAAAAGCTGCGTGA  
AGAGCATCTAAGATGGCAGATTTTCCAGACTCATTCTGGCCTACGAGCGCCGTGACG  
CCATCTGTAGAGAATGGAAGCCAACCTGTAGTAGCTATTGATCGAAATTGCTCTACC  
TTAAATGCAATCAACTTCATGATTTTCCTGGGCGTCGCCCTTTGGCTCTAAGCATAGT  
ACGGCCAATAGCCAGAGGGCTCAATTTGTGCGCTGTGCTATGGCCTCTGACTAATTG  
GCCCCCTCAGCGCTATCCTGATCCACCAGCGTCGCTGATGTCGAGCTCATCTACGACA  
ACAAAGTCGCTCACCAGGCAGCCGTACGCATCGCTGAGCACATCGGCGATGTCGTC  
TTCGCTCCCGCATTCGACCGTGGCCTCACCCGGCAACACAGGATGCTTGCCGTCGGT  
ATCCCACACAATCCCTCGCACGTGAACACCTTCATTTCTCCTCCCTGGAAGTGCAT  
CTGTCCTAGCAAGACAGCTTCAGCAGACTGCACGAGTGAAGGGGGGCTATGCCCAC  
CCCCTTGCCGCCAAGCTGGTGTGCTGACGCCCGCCGATGACCAGATGGTTCGAGGACT  
CGGATGTCCAGGAGGCCCAAGGCTTGCTCCAGGGCGCTTCGTGACTTTGCGGTTCGGCT  
TCGCTGGGCTCCGGGTTGCCGCTCGGGTGATTGTGAAACAGGATGACTGCGGCAGC  
GCTGAGC

>CONTIG\_60\_length\_7113\_cov\_4.635414

CTCAGGTCACGCGCGCGCTCAACGCAATGCGCGGCACGGGCCTTGTCATCCGCACG  
CCCGATCCGGCCGGCACGCGCTGGAGCCTGACGGCGGCCACGCGCGCCAAGGTGGC  
CAGAACCATCACATCTGACGCCGAGAACACCGCGCGGCGCACCAAGCCCGCTGTGG  
TGGCGCCGCACACCACTCCGTCGCATGCGGCGCTTGCGTTGAGCGCTGCACAGAAG  
AAGGCAATCGAAAGCGCACGCATCGCGCAAGAGATAAGCGACTTCCAGGCACGGG  
GCGGCCGCATCGAAGTGCTCGGCAACACGCCGATTGCGCGCCCTGCCGGATACCGC  
CAATCCATGAGCGGCATCGCCTCCGTCTGATGAAAACCTCTACACAGGAAGTACGC  
ACACATGGCTGACGGCTCGCACTCCTTAAATTTCCCCGCTCCGCAGCAATTCACCTA  
CTCCGAACCGCGCGCCTACGTCGCGCAGCGTCTGCGCAATGCGCGCCGGAAGCTGC  
GCGACCGCGTGGACAAGATATATCTGGCCGGGACGGGTCAAGTTTCGTGAAGCGTC  
AACGCGAACCTCAAAGCGGAAAGTTCGCTGCTGACCGCGGCGGGCAGATCCTCGAC  
GAACTCGCCGCTGATCGCAGCGTGAGACTCGTAATAGGCGTAGAGCTTATTAACCA  
GCTCACCCATCAGGTCGAAGAGCTCGAGACCAAATCGGCATCTCGCTGCCGCCATCT  
TGCCACGCGAAATGGGTCCGACTGCCTTGATCTCAGCAGGCTCAAGGCCTGGCGGA  
CTGTTGTAAAAATTCCAAGTTGCAAGAACGGAAGAATCGCAAACGCATCGTCGTC  
GGCGAAGCCTTCGAGCTCGCTGGAGAAAGAGGTCAGCATCGAGAGATCGGGAAGCG  
GCTTATCCATTACAAAGCCATCCAGCTCAGCCGGCGTGGGATTAGCCATTCGAAGTG  
GCGTCCAGTTAACAAGCTTCCCAGCAAGCGCCCTGCGAGCATAGCCAAGCTCTCGC  
GCGAAAGCATGAGCCAGCCGCACAGCTCGCTGACGATCCCGACGCGAACCTTCATC  
ACGCTCGCTCCGCTGCTGCTGGATCGCCGAGGCGCGCTCAGCAGCAGCGGCCTCCCT  
GGCCACCTCGACCTGTCGATCAGCGATTACCAAGGCAGCCACCACGGCCAAGAAAG

TCGATATCGCAGATGCCCATCCCGCTGCTTTCTCCGACCACATCGTGGGCACAAGCA  
AGCTTGTGGCGAACAGTGCCCCACACCGAAGCACAGCGTGCCCAGGAAGACAGGT  
CTGAGCAGATAAGCCGCCCAGCGACGACGCCAACTGATTTTCATCGACTCCCCCTTT  
GCTTATTAAGCGATTTTGCCATGACCAATCTCCATCCGAACGACAAGCTCGCCGCGC  
TGGATTGGGCGCTGAGCCGCGCGCGCGAAGCAGCCGCCAGCGATGAGCTGATCCGG  
CTCACCCACCTGCCGGCGCTGCAGCAACTGCGCGACCATGCGCAGCGGGAGGCTCG  
CGGTGGCTGACGGCTCGCACTCCTTCAACTTCCCCGCTCCGCAGGTCTCGTGTCTGC  
GCCCTGGTGAGATCGTGGTTCGACCTGTTTCGCCGGCGGGCGGCCAGCGAGGCG  
CTGAAGCAGGCGCTGGGGCTCGATCCAGCCCTGGCCTACAACCACGACGAGTGGGC  
GATCGGCATGCACGCGGCCAACCATCCGCTGACGATCCACCATCGCGAGGATATCT  
GGCACGCGGACCCGCGCAAGGACGTTCGCAGGCCGCGCCAGTCGGCTGGTTCCATGCG  
TCACCGGACTGCACGCACTTCAGCCAGGCCAAGGGCGGCCAGCCGCGCAGCCGCAA  
GACGCGGGCGCTCTCATGGGTTCGCGCTGAAGTGGATCGGTCAGCTGCTACGTGCCG  
ACTTGCAGACGGCACGAACACCGCGCCGCGCATTCTGTCTGCTGGAGAACGTGTGG  
CAGATCCTGACCTGGGGTCCGCTGGTGGCCAAGCGCTGCAAGGCGACCGGCCGAGT  
CCTGAAGATGGACGGCACGGTGGCGGGCGCGCGGCGAGCAGGTGCCCCTGGCGAATC  
AGCAGTTGGTGCCGGACAAGCGGCATAGCGGCCGCACCTGGCGGCAGTTCGTGGCT  
GCGCTGGAGTCGAAGGGCTACCACGTTCGAGTGGCGCAAGCTGACCGCCAGCGACTT  
CGGCGCCGGCACCAAGCCGCGAGCGGTTGTTCTGCTGGCGCGGCGCGATGGTGAGC  
CGATCGTGTGGCCGGCGCCGACGACGGCACCGCACCCGGCCAGCAGCCGCGCGTG  
CGCGCCGCCGATTGCCTGGACTTCTCCCTGCCCTGCCCGTCCATCTTTACCCGCAAGC  
GGCCACTCGCTGATGCCACGCTGCGCCGCATCGCCAAGGGCGTCATGCGCCACGTTT  
TGCAGTCGGCCGATCCTTTTCATCGTGCCGGCTACGCATCAGGGCTCGGACCGGGTCA  
ACGACGTGCAGGCGCCGCTGCCGACGATCACCGCCGCGAACC GCGGCGAGTTGATG  
CTGGTCGCGCCGGAGCTGGCGCCCTTCATCACAGAGCACTCGAACGCCAGCAGCCA  
GCGCACCATGCGCGCCGACGAATCGCTGCGAACCATCTGCGCCGGGGTGAAGGGCG  
GGCACTTCTCGGCCGTGGCGCCGATCCTGGCCGGCGTGGGCGGCCGTGCCGGTCAGT  
CTGAGCCGCGCTCCGGTGCTGAGCCGCTCTACACGATGACCACCAAGGCAGACACC  
GCGCTGGTGGCCCCCGTGCTGGCCAAGTTCCGCGGCGACAGCTCCGGCCGCGCCATC  
ATCGAACCCTGCGGACCATCACCGCCGGCGGCGGTGCCAAGCGGCCAGCCGGCGC  
GGCGCATGCCCTGGGCTTGGTCGCGCCCACCCTGGTGCAGACCGGTTACGGCGAGC  
GCGAGGGACAGGCACCGCGCGCCCTGGATCTGCGGCAGCCACTTGGCACTGTCGTC  
GCCGGCGGCGTAAAGCACGCGGCCGCATGCGCTTTCTTGAGCAGGCGAACGGCGG  
CTTCTACGAAGGCGGCGGCCGCGACGCGCGCGAGCCGATGAGCACCATCACCGCCA  
CAGGAAGCCAGCAGCAACTCGCGACCGCGCACGTGGTGACGATGCGCAACAACACC  
CACGGGCAGGCAGCAGACGAGCCGCTGGGCACCGTGTGCGCCAGCACCGTGCACCA  
CGGGATGATCGAGTGCACGCTCAGCGCCGAGCAGCAGGCCGGCGCGCTGCAGGTAG  
CCGCCTTCCTGGTGAAGTACTACGGCACCGGCATCGCGGTGGACCTGCGCGAGCCG  
CTGGATAACCGCGACACGCGTGATCGCCTGGCGCTGGTCACGGTGGTGATCCAAGG  
CACGCCGTACGTGATCGTCGACATCGGCCTGCGCATGCTCAAGCCGCACGAGCTGTT

CCGGGCCCAGGGCTTCCCAGCCACTTACCGGATCACGCACACCGCTGACGGCCGCG  
CCATCAGCACCAGCGCCGCGTGCGCATGTGCGGCAACAGTGTCAGCCCGCCACCG  
CTGGTCGCGCTGGCGCGAGCGAACCTCGACACGAAGCCGCTGCCGATGCAGGTGGC  
CGCATGAGCCAGTCAAAGCTCCAGTCGTTCTCGAGGCCAACGTCAGCACCGCGAT  
CGGCTTTGCCATCTCGTGGGCGGTACGCCGCCCATCCTTGCCGCGTTCGGCTACTC  
GGTCGGCGCCGGCAAGGCCTTCGGCATCACCGCGGCATACACGGTGATCTCGATCG  
TGCGCGGCTACCTGGTCCGCCGCGCGTTCAACCGCATGGAGGCACGCCGGTGATCC  
ACGTCGGAGACTGTCTCAGCATCCTGCCTACCCTGGCAGATTCTCGGTTCGATGCGA  
TCGTTACCGATCCGCCGTACGGCCTGGCCTTCATGGGCAAGCGCTGGGACTACGACG  
TGCCCAGCACCGCTATATGGGCCGAGTGCCTGCGCGTGCTCAAGCCCGGCGGTTCATC  
TGCTGGCCTTTGCCGGCACCCGCACGCAGCACCGCATGGCCGTGCCGATCGAGGAT  
GCCGGCTTCGAGATCCGCGACATGATCGCCTGGGTCTACGGTAGCGGGTTCCCCAAG  
TCACTCAATGGCCCCCTGGGGCGGCACTGCTCTGAAGCCGGCATTAGAGCCGATCACC  
ATGGCGCGCAAGCCGCTGGTTCGGGACGGTGGCTGCAACCCATGCACTGCATGGAAC  
CGGCGGCCTGAGCATCGATGCATGCCGCGTCGCCGCTGAGAGGATGCAGCCGAATA  
CTGGCGCCGGCGGCATGCCGCGGCGTAATGCTGATGAGCAGCGCGGCGCCGGCATA  
GTCACCCAGCCGCATGAACTCGGCCGGTGGCCAGCAAACGTGATGCACGACGGCAG  
TGAGGAAGTACTCGCAGCATTGCCAGATGCGCCCGGCCAACTGGCCAATGCCAGCA  
CCAATAGCGAACAGCGCAAAACGCAGAACACTTACGGAGCAATGCGCCGCGGTTCGC  
GGTGACGAGCCTAGCGCTGACAGCGAGAACGCCGGAGAGGTTGGTTTCCGCATGGG  
GCCTGGCATGCGGAGATTGGATTCAGGGAGCGCCGCGCGCTTCTTTTACTGCGCCAA  
GGCCAGCAAATTCGACCGAGACGAAGGTCTTGAAGGATTGCCCCAAAGTCGCGGCG  
GCATGGTGTCCAATACCAGTGGACAACACATAACCCGAAGAGACGAGGGTTACTTA  
CCAGCAGCGCGCAAGAATAACCACCCGACGGTAAAGCCCACCGACCTGATGCGCTA  
TCTGTGCCGGCTGGTGACGCCCCGACGGTGGAGTAGTGCTGGACCCCTTCATGGGCAG  
CGGCAGCACTGGCAAAGCCGCCGCGCTGGAGGGCTTGGGATTCATCGGCATCGAAA  
TGGATCCAGCTTATGCCGCCATCGCCGAGGCGCGCATCACTGCTGCCGTGCGGGCCG  
CTGCGCGTGAGGCGGCCCTTCCGACACAGATTGGTTTGCCGCTGGGAGACGTCGCAT  
GACATTTGCCACAGTCGCGGTTCTGACCGCCGAAGTGGAGGCGTGCCATGCATGAG  
CAGCTAAGACGGTGGGTCCGACTTGGGGCGAGATTCCCCCATCGAAATAGCCTCGT  
GCGCCTGTTCCACTGCCGCCTCGAGCGCCTTTTCAAGATCGGCGTACTTGGCTTCGCT  
CCAGTTCCAAGCTTCGTCTTCCAAGTATAGCCACCTTGTATCCGCCTTTGACCCTT  
ACCGCAGCTCGCGCGGTGTAGCGGACATGGTTGAAGACGCCACGGGCGCTTCTAGC  
CAAAGACGCGGCATTTCATGATGTCAATCCTATGTGGCCTTCGGGCACCCAGAGTACA  
CCGCCGCCTCTGCAAGCAACTTATCAACTGCCTCAACCAATGAGCTGGACTATCGAC  
TATTCGAGAAATGGAAACGCGACGACCAGCAGGCCACGCAGGAGCCACCATGAGT  
GATCAATCCGAAGTGATGACGCTTCCGAGGCAGCTGACTACCTGCAGCTGCATCCA  
GTCACGCTCCGCAGCATGATGAAGACGCCTCAGCATCCACCAGGCCGAAAGCTGGG  
CGGGCGTTGGCGGTTCCACAAGACGGCGCTAGACGCCTACCTCTCCGGTGAAGCAT  
GGCAAGAAATCCCTACACCCTCGTCAAACGCGGCAGCAAAAACATCCTCTACATCC

GGTACTCGGATCCAAGCGGAAAGCGCGTATTTCTGAAGCACTGGGACTGCCGTCCGG  
GCGCTCGCCATCGAATGGGCCTCGAACTCCACGCGGATATCTACCGCACGAGTCG  
CCTAGGCGACAAACCGAAACGCCGGTGGACAGAGGCCGTACCGCGCTGGCTCACCG  
ATAAGCAAAACAAGCGCAGCCTTGCCAAGGACATGTACAACCTGATTTGGCTTGAT  
CCTTACCTGCGCGACAAGACGCTTGAAGAGATCGATTCTGATCTGATCGCGATGCTA  
CTCGCTGCGCGGATGGCAGAGCCGCGGGTGAAACGCGCAACACGCAAGGACGAGA  
GCACCACCTCACGGGCGACCGGCGAGAAGATGCTGGCGCTGATCCGGTCAATTTTG  
CGGGCGGCACACAGCTGGGGATGGCTCGACCGTGTGCCAGCGATCCGCCTGGAAGA  
AAATGGCAAGCCGAAAGAAGATTACCGGTGGCTCACCCAACGTGAGGCAGAACGG  
CTGCACGATGAGCTGGCCGATCACCTTCGCCCCGCTGTATCTGTTCTCGTTGGCCACC  
GGCTGGCGCGAACAGAACGTGCTGCGCCTGGAGTGGAGCCGTATCGATCTGCGGCG  
CCAGGTTGCCTGGATTGCCGGCACGCATGCCAAAGCGAAGCGCGCGATCGGGTCGC  
CACTCAATGAGCAGGCAATGGCCGTACTGCAGAGCCAGAAGGGCAAGCACCCGCGC  
TGGGTGTTTCCCAACGAACATGGCGAGCCGTACGGTCGAGGCAACAACAATGGCTT  
CAAGGCAGCACAGAGCCGCGCGCGCATCGCACCCGTTGCGATGGCACGACCTGAGGC  
ACACATGGGCAAGTTGGCACGTGATGGCCGGCACCTCGCTACGCTCGCTAATGGAG  
CTCGGCGGATGGAGGTCCTACCAATCAGTCTTGCGGTACGCACACCTGTGCGCCGGAG  
CACCTTGCAGTGGACGCAGCAAGACTGCCCACTCTTGCAACTGGTGCAAAAATGGA  
TCAAATTCAAACGGGGGGCGTTAAATCAACAGCAGCGCGAAGGGGGCAAAACGCTTA  
CGCTGCAAGGCTTTCAAATGGTGGCCGAGGACGGAATCGAACC GCCGACACGGGGA  
TTTTCAATCCCCTGCTCTACCAACTGAGCTACTCGGCCACTACCTGCAACGCGATGC  
CTGCGTTGCGAGGACGCGCATCATAGCGAGCAGGCGCAGTTTGGGCAAGCCTTGCA  
CGCAACTTTGTTGCGGGCCGGTGCCGGCAGCCGGGTTTATTGCGCCGGTTACGCCG  
CGCGGCGGGTGGCATGGCCTAGCCTGCGCGCGTCCCGAGGAGATTGTCATGCGCCT  
GCCCCGCTGCTGCTGCTGCTTTGCTGCTGCCATTGACCGCTATTGCCCAACAG  
CCGATACGCGCGGTGCCGCAG

>CONTIG\_61\_length\_6982\_cov\_30.783807

GAACCAGCGCGAGCACCGCATCGCCCCACAGCGCCGCGCGACCGTTGATGACAGCG  
ATGTTCTGCAGCGCCTGGAGCGGCTTCAATCCCAGCTCCGCGCCCCACTGCATTGCG  
ATCAGACAATTCGCAGGCTTGCCCTTGAAGTCCTTCGGAACGAGGTCACTTTCTGCG  
AGGTAATCGGCAAAGGTGAGCGCCTGCTCGAAGGTCTGCGGGCTGAGGTCGAACTG  
CTGGCGCGGCTGGGCGATCTGCGTGCCTTGCTGCTGTGGAATCGTGGCGACTGCGTT  
CATGGGCGGTCCTTGGGTGGAATAGATGCCGGCATGGGCGCCGCCGGCTGGCGATG  
AATGAGGTGCCCCGTCAAGCCGGGGCCACGCTGGGCTCGCTCGCGCCCTACGCGTC  
GGGGTGTGGTGGAGGGGGCCGGTGCTGATCTCCGGCATAACGGGTTGGCACTCATCCC  
GTGCTTGCGCGGATTAGCCGAAGCGTTCCGCCAGTACCATCTACGGCAGCCGCGCAC  
TTGTTCTGCGGCATTCCGTCCTGCTGCGCATCAGCCTGCGCATTCCCTCCATAGCGGA  
GCGGCCTGGTCTTCGATACGCAAGACATGGACGCTCGTTGATCGCAAGCCGCTCCGC  
TATGGATAGAGGCCGGTCTTTCCCGGCGGTCAGCGGCGTTGCATCCGCACCACTCGT

TCACCCATGAGCTTTCGCTGGGGCCGGTCTTTCCCGGCTGCATAGGCTTGTGGCCTA  
CCGCTCCTTCTCGCGCACATATCGGCGGTGCGTGCGGTTCCCTTCCTTTCCTTTAACGT  
CTGACCTTCGAGAGTCAATGCGCGGTGCGATCGCGTCCGTGGACACCTGCCACGGAT  
CAGGGTTTGGGATCAGGCCGCGTCGGAGAGCGGACGGTCTTCGACCTTGCGGTAGG  
GCCAGCGCACCGGGTCGGCCTTGATCACCTTGTTGAAGTGGCCACCCTTCGACTCGG  
CCGCCTGCAGCGCGGCGTAGTCCTCAGCGGTGACGTTGTCGTAGTGGTAGAGCGAG  
GTGATCTCGCCCTTCCAGTTCTTGAAGCGGACGGCCAACGTCTGACTGGCGGCGTCG  
TGGCCGATGGCCGCGATCTGGCGGCTTTCACATCGATCAGCGGGATGCAGAGGGG  
CGCGTTCATGCCGCCACCTTCTTGCCGGCGTCGATCAGGCTCGCGGCTTCGGCAGCA  
GCTGCCACGTTGTCCTGCGCATCGAGGGTGTGCGCCTCAGTGAGGTCCGCCTGTGGC  
GCGGTGCGCTGCGGCGGAGTCAACGTCAACACCACCTGTTTCGCGGTCCCATGCCTCC  
AGCAAAGGCTGGTAGTCCTCGCTTTCGATGGTCGTGTTGACTTTGATCACCAGCTCA  
CAGCTCCCGCCTTCAATGAAGTCGACCGTTTCCAGCACCAACTCGCTGTCAGCGAAG  
AACAGCGGTTTCGATGTGTTTCGAGCAGCGACGCGATGGTCAGTTCGTAGCCCTTGCC  
TTGATGCCGATCTTCTGCGGCTTTAGATAGGGCAGCCTCAACGCCGTGAGGTCATTG  
CCATCAATGGCAAGTGCCTGCTGCACGCCCTTGCCCGGCTTCTCATAGAACGAGGGG  
CGCAGCTTCGGATCGATGCTGTGAGGATCAGCGCGCTCGCGCCGAGCTTGAAAGT  
GAGAGTTGCAGCCGGGACCTTGTCCTCGCCGTGCTTCTCCTTGCGGAGATTGAGGTG  
CGAGTACTCGGCGTCGTTGGCTTCCAGATGAAACATGGGATACCTCGTCGGTGGTGC  
CGGCGTACCGGCGGGGATCAGCGGATGCCGCGGCGCGGCTGTTCCGGAAAATCAGG  
GGGTGCTGTCGATAGCTGGCAACGGCTGGGCGCGGTGCGCATGTGCTCGGGCGTTG  
CGCCAGCTCTCGGGCAGATGCAGTGCTAGGAAAAATGCGATCGTGTGGAGCGCTTG  
GGCGATCAGATCGGCGTCGCGGCTATAGGACAGGTAGCCGAACGCCACCAGCACAA  
CAATCAACACGCACAGCCACACAAAGCTGGCGTAGCTGCGGCCGGTCACAGGAACA  
CCGCCTGGAAAAGCAGCGCTGCGCCTGCGCCGATCAACATGAAGAAGGCGGCGAAG  
ATCAGGTCCTCGCGCAGCATGAAACGCTGGAACTCGGGGTCGATTTGCTCGTGCATG  
TCAGGCTGCCTCCGGACCGTCGAAGTAGCTCGTTGCCGACTCGTCCGGATCACGCAC  
GTGCTGCGATGCCTGCACGCGCAGAGGGCGTACGTTGTCGGGATTGAAGGTGCGCA  
CCAGCTGCGCCACGGTGACCGCGCCATAGCCACGATCAAGCGCGATGTCGCGCACC  
AGGTGCGCGCCGCGCGCAGCGGTGGGGAAGGGGATGACGGCGCTCATGCCTCTGCC  
TCCATCTCGAAGCCATGAGAAGCCAGCTCGGCTTTCAGCACGCAGCTCGCGCGCA  
TAGCCGTCTTCGAGCTCATGTGCTCGAGTGATGGTGTGACCAACCGATCCGTCCGGG  
CGCGTAATGGTTCGGCCGCCACGCGCACACCGGTTGATCGAGTAGCCGAGGTGATC  
CCAGATGCCGTTCCGGGCCGCACTGCGGGATGGTCTTCATGCCGCCACCCGCCACGGC  
ATCACTGCGACCGGCGCCGGCTTGGCTTCGTACACCGTCAGGTAGTGCTGCACCGCC  
TCGATACGCGAGCAGTCCACGTCGTCCATGCGGCCGTTGATCAGCTGCGACAGGTA  
GTCGGCGACAGCGTTGCGCAAGATCTCTGCCGCGCCTTCGTCGTTGCCCTGGGCCAG  
GTGGCCGGCGATCAGGGCCAGCTGCTCGGTGCTCAGCTCGCCCAGCGCCTCACTCAG  
AACGCTGCCATCGCGGTGCAGGGCCAGCGCCAGAACGTCGGCGCGCTCGTCGGACA  
GCTCATGCCTGCTGCAGGTGCGCGACCCGCATTGCGGGTGGTACGGGTGGCAGCGG

GTGCTGGACATCTACGTTCTCCGTCGCACGTCCCCGGCGGGATCCGGGTGGTTCGTT  
GCGATGGGTGTAGTTAAGCAGTGCTTTAGTCGTTAGTCAAGCACTGCTTTAGTTCGG  
ATGTGCACTTTGACCGCTTCCACCCGGTTCAAGGGCGTGGAAGGCTGAACTGATCAC  
ACAAGAAACCCCGCAATGCGGGGTCAAGAAGATCTGTGTTTGCGAGGAACTGAGAG  
TTCTAATCCAGGAGCTGGGGCTCACTACCTTCGAAGCTAACGGCCTTAACAATTTTCG  
CCAGTCCGCTTGTTCTGCAGTGCGACCGCGACCAACTCGGCTGCCACAATTTTCTGT  
TTATCCTCAGAGTCCGAAGGATCTTGCAACGTCCGGTGTACTCCGCTGTGTGTTTCGTTG  
CAAAGTACGGCGTCACCAGCCTCACTTGGTAGATAAGCGAAACGTTATCCTTCAGCG  
ACCTGGCGATTTTCGGCAGGCAGGTCTACTGCGATACTCAGTCCGGAGTTTGCATTGT  
CGACTAATGGGCCGACCCGTAAAGCGTTAATGTGCTCTCGCGCAAACCCGAGATTTA  
TTGAGTCCGTTTTTTGTTTTTCGAACTGTGGCGGATGCTCCAAATGCATTCCCCGCTCT  
ATAACTGCCGTCTTCTGTCCGATTGCTATCGATTGATCTTAAGTACATTCGCAAGTAC  
TTTTTGTGTTGGCCATGATGCCAATTGGAGGCAAGAAAAAACCTCCACTGTCATCTTT  
CCGGTGTGCGCGTCATACTTCGTCCGTACGTACCAATCTTCTCGGTAACACACCAAGT  
CCATTCTTAATGCCGCTACCACCGATTAAAGCTGTAGCGCGATCCGAGTAAGTGGCT  
GAGCTTTCGAACTCGTCTTGTACACCGAGACGTTTCGCTTAACATATTTGCCAAGTAG  
CCCGCATTTCCAGCAGTGATCGAAGTGCCGATAACTCCTGTGCGTAGATCGCAGGGG  
CTATGGCTAGAGTTATCTGCTGCGGTACTGGAGAAGGGTATCCCTAACGCGATAATG  
ATACCAATGTGAATGCGCATGTGTTTGCCGTCCTGGACTAGTTAAGTCGATCAATCC  
TATTTCTCAGATAAACCTTGCCGCCTATCAGTGTCCCTTTTGGCATCGGGAAGGCAG  
GGTAAAGAGCAGTGTTTGCGCTGACGATATAGATCGCATCCCCCGATCTTGGAGAC  
CCTTTATCTGTTGGCCGTTACCAGTATTTATGAGGTAGATGCCATCCCCATCAAAATG  
GGTCAGACCAGTATCAACCATCAAACCTTTCACCTGGTTGTATGATCGGGATCATTGA  
GTCCCCACGGCCGGTGACTAGAACCAATCTTCCGGGCGGCGGAACAAAGCCAACTA  
TTGACCGTATATATGCGGGCGTAAAGTCCATCGCCCGAATTATCTCAGGATAGTCGT  
CGTTCACCCTCTCTGATCCCATGCCAACCTCCGCGTCCAATTGCTGGACGTGAACAT  
AGCTAGTACTCGTCGCAGGAGCGGAGACAGCAGAGTCTGCCGAGCCCATGCCGAAG  
TGTGAGAGTGGTTTGCCGGTCAGCTGTGACAGCCTCGGAAGCTTGCGCTTATCGACT  
TTGCCAGTGCGGAGCCATCCAGAGACTGCCTGCTCAGTGACGCCAAAGGCATCGGC  
AATCCCCTTCTGGGTCAAATTGGAGTCTTCTATGGCCGTTTGAATCGCGGCCGCCAT  
TGAGGGGTTGTCAAGCATTGCTTGATTGTCCACATGCCCGTGATGGAATGTAAGAAA  
GCGTTGCTTGACTAAGCACTAAAGTAATGCTTTAGTTGCGCTATGAACGCAATCGCC  
ATCGCCATCGAGAAGTACGGCACCCGGGAGGCCGGCATCGCTCGTCTGCTTGGAGT  
CACGCCACAGGCTGTTAACCAGTGGGTTACGAGCAGTAGGTCTGTTCCACCCAGAC  
ACGTGCTGGCAATCGAAACCGCAACCGGCGTCTCGCGCCACGACCTTCGCCCCGAC  
GTCTTCGGCCCCGCCGCCGGCCAACCCCGCAGGGGAGGTGGCCGATGCTGCCTCCCG  
GCAGGAGGCTGCCTGACATGGTCCTTGAGCGCCGAACAGACCAAGCAGTAGCTCTA  
TTCCTCGCCATGACCACTTTCTTTGGTGGCGTCGCTGTGCGCGGCATCGCTCAGGATC  
ATTTCCGACAGCCGAGAAGCGGCCACATGATCCCGTAGAGCACCATGGGTGCGAA  
CGCGTAGCCGCCCCCATATCGGAAGTCCAGAGTCGAGACTGGTCCGCACGGCTTCAA

CCGCCTTTTCACCGCCTACAGCCAGGGCGGCGCGGTGTTGCTCAATTGCCCCCGCGA  
CGATTGCCCGTGCAGCGACGAAGCCGAGCAGCGCGGAAGCGCCGGCGAAGGCTGC  
GCCAAAACACAGGGGTTGAAAGAACTCGGCCACTCGGATGCACACCCGAGGTTTGT  
TCATTGCGAGCGGAAGCAAGAGACCCGCCACTCCGAGGCATGCGGTCCCGAGTGTC  
GCAATCGAATTCATATGTCCGTCTCCGGTCGGTGTGGTGGTTGGCGCCTCACATCGT  
ACCGGTGGGCGGGCACCCACCTAGCTCCCCTTCCGTAACAGCTTCACCAGCATGCGG  
CCGTCGACCCACCGCAGCCCAAACACGTTGCCTCCCACACGCACGATCGTCGTGACG  
TTTGGGGCCCTTCTTCTCGCTGATTTGATCCGTGCTTGCAGTGCGTCCATGGCGCAGA  
GCGTGGCGGATGGTCCCTTCACGAACCACGTTCAAGGTATCCCGCCGATGAACATCTC  
CGATGCAGCACACAAGACCGTTCGCGATTACCCGGGCGGCAGCATTGCCCTGGCGA  
CTCGCCTCATCTCCATCAACGACCGCGGCGAAGAGAAGCCGATGTCTGCGGGCCGTG  
CTTCGCAGCAAGGTCAACCCGAACACGCGCACGCACCACCTGACACTGGCCGAAGC  
AAGCGAGATCATGGGGCTGAGCGGCGACTTCCGGATCCTGCACGCGCTGGCCGCCG  
AGCACGACTTCATCGTCCAGCGCGCAGATGTGCCGATGGCCGGCAGCCTCATGGAG  
GCCCTGCTGGACGCCGGCGAGTTGAAGGGCAAGCTTTGCAAGCTGATCGCCGACGC  
GCTCGACGATCACGTGTTCTCCCCGAACGAATCAAAGGCCGTGGCGGCTGTGTGTGG  
CCAGCTGCAGGCGATGTTTGCCCAGGTGGCGCAGCACGCCTTCGCTGAGGCCGCTTC  
GGTCAGGGAGGCAGCATGATCCTCCAGCTGCTCGAAGACTGGCGCCGTGAGCGCCG  
CATCCGCCGCTGGCAGAGTTGCTGAGGCAGGCACAGGGCGCCGGCAAGAAGGCCG  
TCGCACGCGCCTATTGGCTCGACATGAAACGCGAGTGCGAAGGCCGTAGCGACCGG  
CAGGTGAAGCGCATGGAGCGGTCTGGGGGCCTAGCGTGATGGCTCAGTCGTCTAAT  
GCAGGCTGGCCGGGGTATCCAAGAACGAACCTTGGTTTCCACGTACGAGTCGATCCC  
GTCGTTAACTGGAACGCTCTCGACTGCGATCAGTCGCCAGCCATCTTTGAGTAGCGC  
GTTTGTGTCGTCGACGTGCCGCTCGGTGGTCACCTTGGTCATACGGGTAAAGCAGCTT  
GGCGCTCATCGTCATCTCCCTGGCTTTGGTCCCTCGGGATCATACATGGGGTCGCCG  
ACATGGCTGAGGCTGAGCTGCGCCAACCGAAAAGCCGCTACCGAAAGGTGGAGGTC  
AGGACATGGGGTGATGAAAAATTCCGCGCCTTGTCGCCGATGCCGCCTTCGGGGCA  
AGGCCTCTGGTTGTACCTGATACCCGGGCCACACACCGGCCCCATCCCCGGCCTCTT  
TCGTGCCGGACGAGCGGCGATGGCTGAGGAACTTGAGTGGGAGATGGAAGCCTTCG  
ACTGATACGCCCAGGGTTTCCTAGACATCTCAAGGCCATGGAAAATAGTCGATTCGG  
AGGTGTCTATGAGCAGCAAGCGATATACGGATGAGTTCAAGATCGAGGCGGTCCGG  
CAAGTGA CTGATCGT

>CONTIG\_62\_length\_6934\_cov\_253.533128

GGACAGAATGGCAGCGGCGGCCAGGTCGCCGCGCGCCAGCGCGTTCGTCGCCCTGGG  
CGGCCAGGCTGCGATGGTCCACGCGAATTTGAGCGCCGCCTTCTCAAGATGGGCGT  
TGATGGTGGAGGCGATGAGTTCGCGCACCCATTGCACTTCAACACGTCCCGAAGGC  
CCGCCGTCCAGTTCCTTGGTTTTGTCCGTGAGACCGTCTGGACCCATGCGCCGCGTC  
GTTGCCAGGACATGGACGTGCCAGTTCAAGCCGTCCTTGGAGCCGGGACTGTGGAT  
GCTGGCCTGAGCCGCGAAGCCATAGCGATTGACCAAGGCGCGGGTGACCTCTACGG

CCAGCTCGGACCTCTGGAGGTCATCGAGTTCGTGGGGCAACGCGAACTCGAACTCC  
CGGGCGACCGTGGAATCTTTACGACGCTCGGCCGCCTCCGCCGCCGGCCAGAGCTC  
AGCGGGGACCAGGGCCCAGTCGGGGGCGCCTTCGGGTGCGATGCAGCGCGTTTCGA  
CCACGCCGTCTCGACGGCGGTAGTCGTGTCGCATGCCGGTGATTGCGTCCTCGAGCA  
GCAGGCCGGCACGGTAGGCGGCCGCGGCAATGGAGGAATGCCCTTTGGCACGGCTG  
AAGGTTTTGACGTTGGCATGGTAGATGGCCATGAAGCGTGAGTTCCGAAGCGGTTG  
AGTTCGCTTCGTTATGCCGTGGATTCGGATTTTCGCAAGGGCTGAAAGCACTTGGGG  
TTCAAGGGGCATCGCCCCTTGCGCACGTGTCACGCAGTGACACCTAGGTGCGCTCTT  
GCTTGTTCTTGAAGGCTCTTGTTTTTTAGATCTTTCGGGTCTCGCGGTGGACGAAATT  
CGAGACCGCCTCAACGCTTGACGCGAGCAGTTTTCTGCTTGACTCATTTCCAAGCG  
ACAGGAGAAATGCATGACCGCAACGAATCACTACCGAGACCAAATTCAGCGGGCCA  
CCGAGCGCTTAGCACAGCTGCAAGCGAAAGAGCTTTTAGCCAACCAGCGCCGCGAA  
GCAAAGGCGCAGGAAACAGCGAGGCACGAAGAGATGAAACGACGGCAGCGAGTGG  
CTGACCTAGTCTTCCAGACGGGTGCCCATGCACTAGACGAGGCAGAACTGGAAGCG  
TTGCTGCTCAATCACATGAGGGACCGGGCAGGCTTGCTCCACTAACCTTGCCCTATC  
AAGTCAGCTTTTTTTGCAAGCCACCCAATGCTCGCCCATGGTCATCCGAGGCCATTGC  
TCCCGCTGGACGCTCCCCGGCTGCATCGGTTCCATGACTTGACAACGGATCTGGCCC  
TGCTTGGTAGTCCAGAAGAGCTCGACGGGCCAAGGACGGTGATGGCGTGAAGTCCC  
GACTCTATCGCAGCCCTGATGATCCTGTAGCTGTCTCGGTGAAACCCAACGGCTCG  
CCTTTCAGCTTCCTGGCCGCCGTCAGTGTCGTGACGGTGCCAGGTAGTGCCAGGCA  
TCCAGCACGTGGAGCTGGCGCAAGTTCTCGCCCTTCTCTTCCAACGCAATCCGGCCA  
TGAAAGGGCCAGGTTGAAAGCTCTAGACGAATGAGTGCAGCACGTAGGCGCTCTTC  
GTGCTCGTCCGGGGGCTCACCTCCCGAGCAAGCGCCGGCGCAGCGCTTGAGCATGG  
CCCGAAAGCACGGGCGACCCGAGGGTAGCCGCTCAAGCCCCACCAGGGCGTAGCAG  
AGCCGGTCGTTCATCGGCGATGCGCCGTAAACTTTTTTGAGCGGCCTGGCGATGAGCG  
AACC GGACATGCTGATCGTGGTGATGGCGGAGAGCGGCGGGTATCCAGACATTGCT  
CGTGCGACCGCCGATGGCACGCGGTTCTCAAACCTGATGCGGCGCGAGGACTTGGG  
GAAGGTCTTCCGCAGCCTGGCCTTGCAACCGGTAGCAGGGCTGAAAAGGCGGTGC  
TGAAGATGCGCAGCGAAGCGCTGATCGACGCGGACAAGGATGCCGATGCGGCGACT  
GGACGGAACTTCCACTAGCCGCCATCCTTGCTCGGACACTCTCAGCCGGAAGTCCAC  
TCGCTGACAGGAAAGCGAGCTCCATCGATGGTCTAACCTAATAGAGCCAGTAAGGA  
ATCACATGGACGACGAAAAGCAGCGGATCGCACAGTGGCGCGCGAAGAGGCGTCA  
GGAACGCTTCGAACAGGAACGCGACCGAAGCCGCACGCGGCAGTTTCGAGGCCACT  
TCTTCCTCGCGGACGATGATGAGGAAAGCATCGATCCCGCCGACGACGCCGCGGAT  
GCTGAAGAGCAAGCATTGGCGCAGCGAGCATCGGCGCCTGCTGAACCGTCTCCACG  
CCTGTCCAGCAGCGAGCTGCGCCTTGCTTTGTGGTCTTGGGACATGGATTCGCTCCG  
CCAGTTGTGGAGCGAACGGGCGCAAAAGTTGACCTGTGTTGAAGACGCTGCACGGT  
TGCTTGCTCACATCCGCCACCGTTCGGGGATTGATGCGTCCCTTCGATCTCCGGCGC  
AGATGATGGGCAACGACGCCATCCAAGCCTTGAAGGGCTCACTAGAAGAATCGGGC  
CGGCTCCATCCATCCTCTCCTCCTCCATCCACTCCGCCCGACCCCTCGTTGGAGGGTA

AGCGCGTGGAACAGGTGCTTCGCGTCATCCGTGAAGGTCAAGCCGATTTCCGAAAC  
CGCTTGGTGGAGCACTACGGCGCGCTTTGCATGGTCACCGGAACCTCGCACGCAAGT  
GTGATCGATGCCGCGCATATCAAGCCTTACAACGGGATTTTCGACCAACGCACTGAA  
CAACGGCTTGTTGCTCCGGAAGGACATCCACGCCCTGTTTGATGCAGGTTTGCTCCA  
TATCTCGCCCGACCTGGTGGTGTCCGTTTCCGATTCGGTCACCGATCCTTGCTACCGC  
ACACTCGATGGACAGCGATTGACGCTGCGAGTCCCATCCAAGATTTTCGCATTTCGGCC  
CTGCTTGCCCGGATGCGTGGCGAGTCAACTCAAGAAATGGGAGGCACTCCTGACAG  
CGGTGAGGAACACGATGGTCGCCCACGCTGATCCCTTGAGGCTTGTCGCGCATGGAG  
CACGGCGAGGTGCGCGTTTACCAAGGGCTGCGCCTTCACTCCTTTGCCACCTTCCGA  
GACGAGGTGGTGTTCGCGGCCATCGACTCCCTCGAAAGAAAGATCGAGGAACTAAG  
GAACAGTCAGGAAGAAGTGGAAGAAGCGCTCGCAGCAGACAGCTACGCGGAGCTT  
CATCAATCCACCGTGGAATCGTTCTTGCTCGCCACCCAATCCATGCACGAACGGGCA  
CTGCGCGGCTTGATGACCGCCATGGCGCGAAAGAAGGTATGGTCCAAGGCCCAACA  
AAGCCAGATCCAACGATGCTCTATGACTGGCAAGGAGGTGAGCCTGCAAAAACCTCT  
TCCTAGAGCTTTTCGATGCGCCGATGGACCTGTTTCGGATTGCACGACGACCTACTGT  
TTCTCAACTTGCTAGGCAACGCTCTTCGACACGGCGACGGGAACGCCGCCATGACTA  
TTCATAAGCTTGCCCCGTCTCTCTGGATCAACTGGCTTCCCCCAGGAACGGTCATCG  
CCAATCTCTTTACCGTCCCGCTCGACGCACCGCGCCACCCTGCCTTCGACTCCATCAC  
CCTTCCTCGCGTTGTGCTTGAGCAAATGTTTCATGGCAGTGACGGCCTTCTGGGAGGA  
CATCGAGTTCGTGCGGTGCAACTCCTTTTCCCGGCAGTCGGAGAGCACCGAGAAAC  
ACATTGATCAGCTTCGAAGCCGGCGCGCCATGCGATCCAACGAACGCGTGTGGGTG  
ATTGGCTGACCTCTACCCACGGATGCTGGCGCTGACTCTCACTTTTCAGCGTCCACT  
GGCACCCGGTGGAAGTTCACATTGAGTCGCTTGATGAGTGCCTTGGTCGCCTTTTTT  
GGAGCCCGCGAGCACACCAGGATGGCCTCGCCATTGGGCACCTGGCGCATGGCCAA  
CTGTTTCGGCACGCAGGATGGCGCGGTATTTACGCACTGATAGACCCCGCGCATGA  
GCTCGTCCTCCGAGCACTTGCTGGTCTTCACCTCAACCGCCAGCCGCTGCTTGCCGTT  
CTCGAACAGCACGTCCAATCGATCCCCGCTGCTCAACACGGCCTCGTTCCGGCCAGG  
CTCGAAGGTGCCGAAGTCGGCCAGTTCCTCGATGTGTTACGCACCCAGCGCTTGAG  
GGCTTGGTGTTCGGCGCTCTCGGGTGCTCCGCCGGCTTGAACCTTTGGGCAACGGTAG  
CACGTCGCCTTTGTGCGCCTCCAGTTCTCCGGACGCGGGTTCCAAACGGGCCACTCC  
AAGCGCCGCGGCGATCTGGTCCCCTTGTCTGAAGTGGTAGACGGCGTTCATGGCGG  
CATCGAGGTAGGCCTTGCGGTTCGGCAGCCATGCCAGCGCCGTTGTCTCGAAGAAG  
TAGTGGGCGATTTTCGTGCGCGCCCGTGCTGGGGTAGCCCGTGCTCTTGCTCACAACA  
ATGGTGTTCATCGGTGGGATGCGCTCTCCACGCCACTCCGGCAGCAACCCCAACTGC  
TCGATGGCGAGGCCACCGCGCCGACGGCGGGCCCATAGACCGTCTTGCGGGCCTT  
AGGCTCGTGCCCGAACTCGCGTTCCAGTTGCTTGGCCAGTTCCTCGTAAAAGATGGG  
CCGCCCCCTCCTTCGCCCCGGCGAATCAGGATTGGGAGAATGTCGGCCACGACCTGAAT  
ACGCCAGGGGGTATTGGCGAGGGGGAGCTGGGTCCAATCGAAGGCCATCTGTCCTT  
TCCTGTATTTGCATATAGGCATCAACGCATAGCCAACCAGCATCATCAAGACTGACA  
ATTCATGTTCCCAATGGGAATTCGCATTTCCCATTTGGGAATGTGGTGTGACGCGCA

GGAATTCGAATGCAAAGCTTTCCCCACACTAAGGGGGTATCCCATGTCATCTGAAAG  
TCGAGTTACGACCTACACCAGCATCTGTTTGATTCTGCTTCGGGAAACGAGGTTGGA  
ACGCAACATTCACCAAGCACAAATCGCCGATCTTTTGGGCAAAAGTCCCAGTGCAT  
GGACGAAGATTGAGAACGGCCGCTCGCCGCTCACGTTCTGAAGAACTTTTTTCGCGTGT  
GCCGTGCGATGAACATCTGGCCATCGGCACTGATGGGAGCGATGGAGCGTTACGAG  
CAGTTCTTCTTGAACAATGGACTGATTGTTATCGTGCAGACACTTCCCTTCAACGAA  
GACGCGTTGCTGTCCGATGCCCAGGACTACTACGGCTCGCCCGGCTTCCGTGCACGG  
GGCCCACAATGGGGGTGCGCAGCCTTGAACGGCCCCCACTGGTTCAACAACCTCGGT  
GAGTATTCCGGACGTGTTTCGCTTCTCGCTGGACACTGATTTCCGTGAGAAACAGCT  
GAATCCGCCCCGTCCTGCAACACAGCACTTACCCTTCAACTGGTGCGCTGTAGCCCAC  
CTCATCGGAAACTTGATAGTCAGAACTAAGAAAAGCCCAACCGTTTATTGTTCTACT  
GTCCTTGATACGTTGGCGCTCTTGCCAGCAAGGCACTGTTACTTCGGAAAGTTCCCA  
GGCCATCTCAAGCTTTTCTAGTGGAGTCAGGATACCCGGTGGCGCAGGGCACTCGCC  
ATCGGGGCTATCGAATAGCACCAGATGAAGGGTAAGGCCGGTTCGGTCATCAACAA  
ATCTGTAAAGCGTTGCCGTGTTTTTTGTGGTTGTAGTCATATGATTTCTCGTAGGTT  
GGATACAACATTCAGTTAGCCAGGAAGAACCTGACACATCATATTTAGGCCAACTTT  
TTTGTCTGTAGCGCGGACCGCTTTCACTGACACAAGACGGTCTTCACCTTGCCCGCG  
CCCGGCGGTGGCGAGTGCAACACGGCTCGGCACACCCCGAGAACCTGCACTTCCAT  
CCCTGGGTCTGGGTGTTCCAGATGGAGTAACCCGTCGTAGCCCACCATCGCTTTCTC  
GTTCGGCGTGACGCGATGACCGGCGGAATAGGCGCTCCGTCCAGGACGAAGCCCT  
TGGCGTTCTGGGTGAGCACCGGTAACGTCACGCGCACGCCGCTTGGCGCGGGGCC  
ACGGAACGCTTTTCCATTTTCGCTATCTCGACACCCACGAGCAGGTCCTTGTCTTG  
AGGCTCACAGTCGTGGGCACAAGCGCTGGCACGTTGATGATAAGCACTCGGCCCTG  
CTTGTTCTGTCACCTACCAGGCTCCCATTCACCCGCACCGGCAAAGCGGTTTGCCC  
GGGCACATCCACACCGCGAAGCTCGAATACGTTAGGCGGCCCCAAGGCGACCCCTTG  
GTTGTCCACGAACAGCAACCCGGAGAGGCTGGCTGCGGTCGACTTCTGCCCATCAA  
AGCTGCCCACGCTCACGCGCGTATCGCCGTCGCATGTCATCGTAACGGCGCTGATCC  
GGGTGCTGGTGCCTTGCTCGCCGTCGGTATGCTCTGCAGCCTGGCGAACTCCCAGCA  
TGGGTCCTCGGTAGTCGTAACCGGCAGCGCAGCGCGTCCACCATCGGTTGACCGGC  
CGGACTTGCCGTTGATCACTCCCCACGTGTCAGGTGCCCAGGTGCTGCACACGGTGA  
CGTTGCTCTTGCCGATCTCGTCCACCCACCGCCGGCTCGTATCCTAAGGAATGCGT  
AAGGAGTCACACTCCAAAAAAGCAAACCCCGGGTTTTCTCAGGGTTTGGTTCGTCGGC  
GCTTTGATGAAGGCTGTTATTCCCTCGCCCCCTTCCCGGCTCACTTGGGCCAGTAAC  
AACGTGAGTTGTTCCGTTCTTATTGGCGCTTCCTTGCTTGGGTGTTGGTGGCCTAGAC  
GACAAGGACAGATTGCCCTGTCAGCCTCCCGTAAAATTGATCCAGCCATAACTAGA  
GGTCTCCGGCACACTAGCCACCAAGGAGACCACCATGCGCAAGAGCAAGTTCACCG  
AGAGCCAGATCGTCGCCACGCTGAAGCAGGTC

>CONTIG\_63\_length\_6909\_cov\_4.451194

CCTCAAAGCCTTTCTTGCGGCGCTGGCCGCCCTCCACTTCCGTGCGCAGGTACTTCG  
CCGGCGGCGTGCCTTTGAACGCCTCATCGCGCAGGAAGATCTCGGCGAACAGGCGA  
TCGCGCGTCGCCTTGCGGTACATCGCCGCGTTAATGGTCAGCGGTGCCGGGCGATCG  
AACACGCGCGGCGCGGTGCGCTTCCACACCTCGCGGATCTCGTAGGCCGTGGCGTTG  
CACGCCTGCATCACGGCATAACGGCAGCTGCTCGCGCTCCAGCGCGCTGAACTGCCG  
GCCCAGCAGGTTGTCCGCGTCCACGGAGATACGAATCTGGCTCACGGGCTGCCCTCG  
CCTACTGGCGTGCCCTGCACCTGGCTGATCTCATCCAGGTTGGCCTCGTAGAACTCC  
AGGCAGCGCTTGCGCCACGCGAGACGTCCAGCACCTGCTCCAGCGCGCCGCTCTTC  
ACCCAGGTGCAGTGCTGCGTCAGGCGCGGCTCGATCTGCACATAGGTGCGCACTGG  
CACAGCAATGATCGCTGGCGCTGGCGTCACCACAACGGGCCGCGCCGGGTCCTCGC  
GCTTGATGCCGTTGCGGGCCGATCCAGCCAGCAAGCCGGCGATCGCGGCAATAGCG  
AACAGAGAGCGCAGCATTAGTAGCCTCCCAGGCTGGGGCATGCCGCAGCCAGCGCC  
TGCAGTGCAGCGGTGCACTCGGCCGGGCGTTGGTCGTATTTCGTGTTTGAACGCCTTG  
GCACTGCGGTGCGCGGCGGCCTTGCGGGCTTCGGTCTTATCGCGCAGGCCGGTATTG  
CGCTCTTGACAGCAGCCGCAGCTTCTCGGCCTCGGCTTGCAACTTGGCGGCGATGGTT  
GCCAGTGCGGCGTCCTTGTCGGCGTTATTGCGTTCCAACCTCGGCGCGCTTTAGCTGC  
GCTGCTTCCAGCGCCGCAGTGCGATCGCTCTGGCACTGCGCTACCTGGCGCGTCACC  
ACGATCACCTGCTGCCCTTGCGATAGGAGGTGAGTGAGGCAATCGACAGCAGCGC  
GGCAAGCAACGCGCACACCACCTTCAGCCGGCTGCCCGGCTTACGCAGCCAGGTCA  
GCGCATCGGCGGGCCAGCCGAACACCACCGCCACCAGCGCCTTGAAGAAGGCCACG  
ATGTTTCATCGCTCGCTCTCCCGCCGGCGCCATGGGTAGATCAGCAGCACCGTCAGGC  
ACACGCGCACCCAGCAGCACATAACAGGGCGCTGGCGTGTGCTGCGCCAGGTGCGCG  
AGGAAAATGCCGAGCATCCCCACGGCCAAGCCGATGAAGCAGGCGCCACGCAGCG  
CCCAGGCGGCGCGGTCCCCGCGCGCGCTCGCCGGCATGAAAGGTGTGCAGCAGCTGC  
CAAGTTGAGGCGCAGAACACCGCCAGCGTGCTGGCCAGGCTCAGGAGGTAGAGGCT  
CACGCCGCACCTCCCGCACGCCCCGGCCAGCCGGTCGGACCACTTCTGCAGCGCGCCC  
AGGTAGTGCGGCAACATCGGCTTGATGATGAAACCGCTCAGCCCGCTCACCGCAAT  
GCCGATGCGATGGACGGAGGGGAAGTAGTTGGCCAACGCCACCACAATCCAGCCGG  
CGGCCAACGCAAAGCCCAGCACGAACAGCCCCAGCAGCCCCACGCGCAGCAGCAG  
CGTCAGCCACTGCACGCCCCGGCCCGCGCTGGGCGCCGAGACCTTGCCACGTCGAT  
CTCACTGAGCAGCAGTAGGCCAACAGCGCGCCTACCACCGCGGCCAGAAACCACG  
ACTGCGGAATGCCCAAAAACAGGTGCTCGCTGCCGGTGATCACCTCGGTGACCACC  
GCGCTGCCGGCGCTGGTCGCCACCAGCAACGCGGCCGACTTGAGCACCAGCGTGGC  
GCCGCCGTCCATCACCGGGCAATCCCCGCCAGCTCCACGCCATCCCAGATGACCGCA  
TCGCCCCAGAAGTTGCCGCCGTTCTCGTGCTTGGCAATCGCCTTGGCCAGCTGAAAT  
ACGGTGGCCGGTGCTTCCACATTGATGCGCTGGTCCACGTCCACGCCGAGCGCGGTG  
GCCACCTGGCGCGCATAGGCGCCGGTGTGTTTTCCACCGGCGGCGCCAGCGGTTG  
ATGATCCCGCGCACCGTGCGCAGACCATGCTTGCGCTGGTAGGTCAGCAGCGTTTTG  
ACCAGGGCACGGAAGCCGTATTCGGGCGTGTCGAACACGGCAAAGCGCGCCTCGCG  
TGCGCGTGCGGGCCGCGGTGCGGTCTTCGCCCTGCCAGGCCACGCCCGTGCGATCGAT

GTTGCCTGGATTGTTGTTGCGGACGCCGCGCGGCGGGGCCATGTCTGATCCTTGGGT  
CATGTCTGAAGAGAGCCACCACCGCACGCGCCACCCGGGCATCTGCGTGCGGTGATG  
GGCAAGGCTTAGGCGGCCACCGGCGTGGCGGTGCCCGGGGTGAGGCGCACCAACAC  
CGTGGCGGCACCGTTGGCGGCCGCTCGATGGCATAAGCCAATGGCGTTGGTATCGCC  
AGCGCCGCCAGCAGCAGAGATGGCCTGCTTGGTGTGCGCGTCCCAATTGACCGAAG  
CGCCGCGCGCGAACACGGCGGCCGGCAACTTGGGCAGCGCGAACACGCCTTCAACG  
TGTGCGGCGATCGTGTGCGCAATGGCGCCGTCGGTAACGGCGATGGCCACCAGCTT  
GCCGTCGGCGATCACACCGCCGCTGCTCACTGCAGCGGCCAGGATCACGTCCAGCA  
CGCGGCCGTCTTGATATGCGTTTTTTCATGGGGAGTACTCCAGATGCGAAGAGACGCC  
GCACCGCGCCTGCGGTGCGGCAGGCGGCTTACTGGCCGGGGTTCTTGTAGATGCCGC  
GGTAGTCGGCAATGGCCGGCGCCGCATCCAGGCGCACTTTCAGGCCACACCGTCC  
ACGGTGAATCCTTCGTGTTGCTCCAGGTAAGGCGTCTGGTTGCCGTCCAGGTAGCCC  
ACCACCAGCGCATCTACATAGGCCGAGTTGGCCAGGCCGTACCACGCCTTCGGATCT  
GCACCATCCAGGCGGCCGTCGCTCTCCACCTCGAAGGTGTTGCGCACGATGTTGGGC  
GTGGTCTGGTTGTTGCGCCCCGCCACCGCGTACTCGGCCGCGCGCACGGTCAGTGCC  
GCACCGGAGAGAGCCACCGGCGTCAGCAGCGTCTTCATCGGCACGCGGATGATGTT  
GCCGTCGGCATCTTTCTGCAGTGCCATGCGCGCCTGCATGGCGCTGACGCTTTCGGT  
GGTGATGCCGGCGGCCGGCAGCAGGTTGCCGTGGTCGGCATGGAACAGCGTCTTGC  
CGTCGGCCAGCTTCGGGTTCTTGGTGATCAGGTCATACACCGCCTTGGCCAGCGTGC  
GCTTGGCGGCCCTGGCCCATCTTGC GCGGCACGTCGCTGAAGATGCCCAGATCGTCAT  
TGATGATGGCCTGGCGGGTGATGGTGAACAGCCGGCCCCAGGTGATGATCTGCATC  
GACTGCGATTGCTCGCTGAAGGTGCCCTGCTTGTACTCACCGCCCTCGCGCACCGGC  
AGCAGGTCCGAGAACGCGCCCAGGCCACCAGATTGGTCGGCTTGAAGTCCGGCAC  
GCTCACCGCGCGGGTGAACCTCGCTGAAGCGCTCTTCCACTTCCTGATAGCCCTGCAG  
CACCGAGCGGCGCGCGGCATCGCCAGCAACGCCGGGAAGTCCGAGGTGGAATGG  
GTGAACGCCATGCCACGATTTGCGGTCGGTCCATGCCGCGCGGATTACGCCGGCC  
TGCACCAGGCACTCGCGCGCCATCTCGGCCAGCGAATGGCCGCGGTACGGGTTGTC  
ACCGGTGGCCTGCGCCAGGCCACGCGCGCCTGGATCGCATTGGTCATCGCCGCGC  
GCACGTTGTCGCGCTGGTCGCCGCCAGCAACAACGCCGGCGCGGCCGTTGAGCGGC  
TCACTGTTGCGGCCCATCAACGCCAGGATGTGGCGGCCACGTTGTCGGGGGTCACC  
GCAGGGTCGGCGGCGGCAATGACGCCGTCCACATAGGCGCGGATCTCCGCATTGCC  
CATGTGCGGCTCAGCCATCGCCATGATGTCGGCGTTGCGGCCGCGCATCGCGACCAG  
CGCCGCTTGACAGGCCGCTGCGGCGTCCGGCGCAGCAGCGACGACCGGTGCCGGTG  
CCGGTGCAAGGCGCAGGCGGCGTAGCCGTGGTGGTGGAAGCACCTGCCCGCCACCG  
GCGTTGGCGAGGATGCGGAGGTAGGTTTGTGGGTCATAGGATCCTCGATGTGGCCA  
ACGACGGCCGTTTGGGTGACCTCGGGAAGTGAGGCGAAAACGCTGGGGCTGAGCGC  
GGCGGCATATGGCCGCGCAGCTGCGCGGCGACTGGCGCTGGCGCTTGGGTGATGG  
CCTGCAGGTAACCGGTGAGCGCCACAACAGACGCGGCCTCGGCGCGGGCCGTGGCA  
GCGGTGTCCGCCACGCGGTGCGCAAAGCCGAACCTCACCGCCTGCGCGCCGGTGTA  
CCAGTGGTCGGCGCCATCGGTGAGCAGCTGCTCCACCTCGGCGCGCTTGCCCGTCTT

GGAGGCGTACGCCTCCAACATCGCGCCGGCATGTGCATCCAGCGCGGTGGCGTATT  
GGCGGAACGAGGATGCATTGCCGGCGGCGATCGTATGCGGTGCATGCACCATCAGC  
AGCGAGCTGGCGTACATCACCAGCTCATCGCCGGCCATGGCAATCAGCGAGGCAAT  
CGAGGCCGCTGGCCGTCCACGAACACCACCTTGTGCGCGGCGTGTGCTTGAGCGC  
GTTGTAGATGGCCATGCCATCGGCCACCACGCCGCCGCGCTGTTGATACGCACGTG  
GATCGTGCCGGCGCTGATCTGCCCAGTCTGCTCGGCCAGCTGCAATGGGGAGACAG  
ATTCAGACCACAGGCTGTCGCCAATGGTCCCGTAGATCATCACCTCGGCCACATCGG  
TGGCGCGGGCTTCGATCTTGAGCAGGCACGGGGCCGAGCGCCGGGCGGCATCGGCA  
AGCACGCGGCCAGCGCCGCGGTGAGTGCCTGGGGTCGCATAGTCAGATGTCCCTC  
AACATGTGCGCGCAAAGGTCGGCACGCAGTTGCGCGCGGGCTTCCGCAGGGGCGCG  
CGCCGCCGGCTGCAATTGCTGCTGCTGTTGCTGCCAGTCTGGCGCTGCCGCAGCAC  
TTCGTCGGGGTTGTTGCCGTACTGCAGCGTGTCTGCTGCGGGCTCACCCAGCCGCG  
ATCCTCGGCCTCGCCTTTGGCGTAAGCCTCCTTGAGCGGGTCGATCCACGGCATGAT  
CGGCCGCACGTAGGTGGAAGCCGCCAGATGCCGCAGCGTCCAGCCGCGCGGCATGC  
GCACCCTGCCGGACAGCACCCGCCGCTTCGATAAAGCGCTGACGCGTCGGCCGCACG  
AACAAGGCAATGAAGCGCTCGGCCAGCATCAGGTAGCTGCCCCACTTTTCCACCAG  
CTCCTGCCGCTGTGCGGAGTACGTGCCGTTGTAGTCCAGCGACAAGCTGGAGTAGCT  
CACGCCAATGCCGCCGGCAGCGGCGCGCAGCTGTTCTTTGCGCCAAGTCGCCGCGTT  
GGGGTTTGGGCGGTGCGGTGCCAGGCTCTCGATGGATTCGCCCGGTAGCAGGTGCTC  
AAAGATCGCACCCGGGCGCCATGCGCAGTTGCGCGCACGGGCACGCCCTGTTGCATCA  
GCGCCACACCACCGAGGCCTTCGCCCGGCGGCTGATACACCTCGCCGGACCCTTTCT  
TGATCTGGAACGTCATCGACGCCGCCACCTTGGCCGCGATGCGCTCCGACTCTTCGT  
AATCCTTCACGTCTTCAAAGCGCGACATCGCACTGGCAAACACGCTCAAGCCGCGC  
ACCTGGTGCAGGCGCTTGAGGTGGGCAATGCAGTGCATCACTTCGGCGCTCACGCG  
CTTGGTTTCGGTGGTCCAGCCCAGCGGGTCCCCCGGGTGCTGCTTGTACACGTGGTA  
GGCCACCGGGCGGCCCCACGCGTTGCGCTCTACACCCTGCAGGATGTTGCGGGACG  
GGTCGTTGAAGTCCAACGGCACCCAGATCGGCCTCCAACATCTCGATGCTGTAGGGC  
ACGCCGCCGCCATGCTCCAGATACGGCACACCGCCGCTTAGGTCTTGGTAGAACGCC  
TCGCCATCACGCAGCCAGCTGCGTGCCAGCAACTGCTGGCACGCGCCATAGTCATGC  
GCGCGAGTCACTTCGGGCGCGTCCACCCACACGTCCACAGCTCATCCAGCTGCAGG  
GCCAGGTCGCGGTTGATCGGCTGGCCTGGCAAGCGCGGTGCAGACAGCACGTCGAT  
GCCCCGAGCCACGGTGTTTTGCACCAGCACGTTGAGCGCGTTGTCGGCCAGGTCCAG  
ATCGCGCTCAAGGTGGCGCGCCTGGTTCGCGCAGCTGGCGGGCGTCCATGCCGGCAA  
TGGCGTTACCACTGCCCCAGTCGCGCGCCAGCTTGCGGGCTGCGCGACGGGCGGGTC  
ACCTCATGGGCGCGCGCTAGTACGCGCAACTGCTCGCTGCGCTGGGCGAGCTCGGTT  
TCCTTAGCAGTGACGACATCGGCCGAGCGGGCCTCAATGGCACGCACGTTCCGGTC  
ATGGGAAATTGCGACGCTTAGCCGGTCGCGCGCAACGGCAGCGGTGGCCATCAAGT  
CCGGCCGCCGAAATCAACCGTCGCCAGCGAGCGCGACGGCCGGTACAGGCCTGCT  
GATCTACGGCGGCCTGCCACTCCTGACGGCCCTTGCGGATCTCGGCCAGATCCGCGC  
GGGTGAGCATGCGCTCACCGAACCAGGACGCTCTGCCCTGCAGCACGGCAATCTCT

GCCTGCTGATACGTAGTGAGCATTTCTGCGCCGTCTTCATGACGAGTCAGGCTAGG  
GGTGCTCCCTTCCAAAATCTAACTAAAAATGGAGAATTAGAGTATCAATAAGTTATT  
GATTTTATTGATAACCCACTCC

>CONTIG\_64\_length\_6760\_cov\_6.532640

ACCAACATCATTGCCAGGAGCGCAGCGAACGCTCCTTGTCTTGAAAGTTCCATATGG  
CCTCGGGTGGGTGCAGTTCTATCTGCCATATTGGCAGATAAGTGCGCTAGGATGCTA  
CTCGGTGCAGACTTGGGGGTCAGCTATCAGTTAGATCTCCATGCCCCGATCCCTGCC  
CACAAGTTCTGTCTTTGGTCGTCGCTTGCGCGCGGCCCGGCGCGTGGCGGGCCTGTC  
GCAAGTCGAACTAGGAGCGATGCTGGGGATGAACGAGAAAGCTGCCTCGTCACGTC  
TCTCCCGTTACGAGCGAGGAGACCGAGAGCCCCGACCACGAGACCCTGGCTGCCTTG  
AGCGATGTCTTGGGGGTTCCGGAGGCCTACTTCCACGCCGGATCTGATGTCCTGGCC  
GAAGTCATCCTCTTGTTGCTCGGCTGCCCCGAGGAGCGGCAACAAGCAGTGCTAGA  
CCTCGTCAAGAGCCATCTCACTTCGGATTAGCTTGGTGTGCCTTGAGCTGGCCGCAG  
CGCGGTACCGAGGCCCCAATCGATACAAAGCCTTTCACGATGGTGGGGCCTTTTTTG  
CGGCCCCGCCCCGGCTTGGCTGCATCAAGCCTATGAGACAATCTGATGATGAGCATTG  
CACGTCCCCGCCCCCAGATGGACCCCGCGCTGGGGAAGAAAATTCAGCGCATTTCAG  
CAGGACATCCGAGAGGAATACCTGGCCGATCATCAACACCCCTGGGTTCATCGGCTTT  
TCCGGTGGCAAAGACAGCACCTCGTTACGCACCTGGTCTTCGATGTCCTAATGTCT  
CTTGCTCCGCACGAGCGGACGCGAGAGGTTTCATATCGTGTCCAATGACACCCTCGTG  
GAAAGCCCCGCTGGTTCGTCACCCACGTTGCCACGGTCCAGTCTGAAATCGACCACGCC  
GCCAATGCTTGGCGGATGCCGGTTCGAGTGGTGACCACACGCCCAGAAACGGATTC  
CACCTTCTGGGTGAACCTGATTGGCAGAGGTTATCCGCCGCCGAACAGGTCATTTTCG  
CTGGTGCACGGACCGGATGAAAATCCAGCCGACGAGCCAATACATCCGTTTCGCAAG  
CGGACATGGCAGGGCAGGTGATCCTTCTTCTGGGCGTCCGGCGCTCGGAGAGCTCC  
ACGCGCGCTGCAACGGTTGCTCGCTACGACAATGGCGAACGGCTCAACCGGCACAA  
CGATCTTCTCAACTGCATGGTCTTCCGCCCCATCGTTGAGTTGTCTACAGACGAGGTT  
TGGGAATATTTAGCCTTCACGCCCCCGCCATGGGGAGGGTTCGCACAGCGCGCTGATC  
CAGCTCTACATGGACGCGGGCGCGGCCGAGTGCCCGACTGTGTTGTCCAGGATGA  
CGCGCCAGGCTGTGGAACCTCGAACTCTCGGTTTGGCTGCTGGACATGCACAGTGGT  
GGACAAGGACAAGAGCTTGATGGGGTTCGTTGAGGCGGGCTATGGCGAATTCATC  
CTCTGGTTCGATTTCCGAGATTGGCTGGCCGGGATCCGGAATGACCCAGAGCGCCGTC  
TCGCTCGCCGCAGAAATGGCAAGCTGACCATCACCAACGACGGCGTCTTCATTCCAG  
GCCCTTTCACGTTGGAAACGCGTCGCGAGGTTCTAGATCGGGTTCTGGCACTCGAGC  
GGGAAACCAAGAGCAAGATCATTGAGGAGTCTGAGGTCATCCGAATTCGAGAGATT  
TGGGCCGAAGACGCCAGCACGTTTGCTACCAGGTCCGTAGATGAAGCACGGGCCGT  
TGCAGGTTCCAAGTAAGGACACAGGGGAAGATTTAGATGCCACGTGACGTCGTAAC  
GCTTTTCGCCCAAGAGGCGGGCAACAAGTTGATTTCGTAAACACTGCCGTCAGATCGG  
CTTGCCGGTGAACGACCTCCGCAGACTGGTTGAAGAGGTTGTTGATAAGAGCACCAT  
GCAGCGCCGCCACGGCCTTGGGAGGCCTTCGACGAGGTGCTGGGCGAGACGTATG

AAGAGGAGGCCGACAATGCATCTTGAGTCAATCAGTCTGCGAGACTGGAAGGCTTT  
CGAGTCGGCTACCTTCGAGTTTCCTACGCCCCGGCAAGACGAAGAACGTCGTTGTTAT  
CGGAGGGCGCAACGGGTTTGGTAAGACCTCGCTGTTTGAGGCATTGGCATTGGGCTT  
GTTTGGCCGCGATGGCTTGCGACTGGTGCTGCGCGCGGGCGTTGCCAGCGACGAAC  
AAGGGCGGGCGCAGTCATTCAAAGAGTTCATGGAGCGCGCCCTTTTCGGTAATGCG  
CTTGCCAATGGCCGTTCTTCCTGCCGTATTGAGCTGAAGTTTATTGATGATGGCGGC  
GATCCGATTTGGATCGAGAGGACTTGGTATTTCAATGACCAAGGCAAGCTGAAAGC  
TGGTGAGTCAGCCGAGCAGCTAAAGATTTTTCAAGGCATTGGTCGGCGGGTCATTGG  
GCCCCGTGCAACAGAGCATGACATTGAAGGCTGGTATCGCGATTGGGTGTCCAAGA  
CCTTCATCCCTACGTCGTTGGCAGGGTTCTTCCTTTTCGACGGCGAGTCAGCCGCCGT  
GTATGCCGAACGAGACATGGGTTCACAGGTGCGAGAGGGCATCGAAGGGCTGCTGG  
GCTTGAAGTGGCTCAAGCAGTTGCAGAAGGACCTTCGCACCTATGCAAACACCAAG  
CGCAGCCAGGTCCCGAAAGGGGTGAGTAATGAGGCCATCGCCGAGCTGGATTCGGC  
TGTCGGCAGCATGGAAGAAGAGCTAGCGCGTTACGAAGAGCGGCTGCAGGCCATTG  
AGAATGAAATCCGCGACAGCGAAACGTTGCGCGATTTCATTGACGCGAGAGCTTGGC  
TACGGGGCAGGCACCAGAGCCAGCTAGAGGAGCTCACCCGTGAGCAGGCCGACTA  
CGAAAAGCGCTACAACCTCTGCACAGGACCAGCTGGTCACCGCAGCGCAGTCAGATC  
TACCGCTCGCACTTGCTGGCGGCATGTTGCTCTCAAAGGTTGAAGCCCGCCTTGACC  
AAGAGGCGCGTCTGGACCAGTGGGAAGCTGCGCTCTCTCAACGGGATGATCGCACC  
GCCAGCGTCCTCGAGTTCTTGAACGAGCAGTTGCCGACGGTGGAGCCCGAGCTTCTT  
GAGCGCCAAGTGGCTGGCGTCCGCGAGGCCGTGGAAAAGGCTCTGGAGCGGTTGTG  
GTTTCCGCCCCCAGGCGATGTGGCCGATTCTTTTAGGCATGCGCACGCCCGCGGCCC  
AATGCTCCAGCGGGTCTTGATCGTCTTCGCGATGCAAAGGCGGTCTCCTCCGCAAG  
CATTGTCGAGCTGCTTGAGACCATGGAGAGCAGCTCAGCCAAGCTGCGCGAAGTCT  
CCGCTGTCAATTCGTTTCGACGGAGGGAGCCACGCCGACGGTCGAAGAAAAGCGCGAC  
CAGCTAAACGAAGTGAACACTAAAGTGGGCCTGATGCGCGAAGAGCGTGGCTCGCT  
GACCAACATGGTCAAGTCTCGCGGAGCCGACTTGGAACAGAAGCGGCGCGAGCTGG  
GTCGCTTGACTGGGCATCTGGACCAATCCGAGCGGCCGGCGCAGTTGGCAGGTCTG  
GCTGAAAAGGTGCGGGAGATGCTGGGGAATCTGGTTGAAGAAGCCTGGCCCTTGCA  
GTCCGATGCCGTGGCAGAGGCGATGACCCGTGGAATTCGTGCCATGGCTCACCGCA  
GCGACTACTTGCGGGACGTCACAATCAATGAGGACGGCGCTGTTGAAGTGGCCTCC  
CCAGACGGCCGAGATCTACGTCAATACGACCTGTCGGCCGGCGAAAAGCAAATCTT  
TACCCAAGCGCTTTTTTCAGCCATCGCTGAAGTGTCCGAGCGCACCTTCCCTTTGGTT  
GTGGACACCCCGTTGGGTCTGCTGGACGAGAACCATCGACTGAACGTGCTGAAACA  
CATCACCAGCCGCAAAGGGCAGGTCATTCTGATCTCTACGGATACAGAGGTGGTCG  
GTCAGTTCCTTGCCGCGATACGCGCCAAGGTGTCTAAGTTCTACATCATCCGAAACA  
AGGTAGAGGGTGGCGTGGCTCGTAGCTGGTGCGAGGAAGGCTATTTTGACGGGCAA  
GGAGTCTGAGATGAGCAATGGAACAAACGACTATCTGACCCTAGAAGTGATTGCCG  
GCACGGCCTTTTCGCTCGACCGCTGACACGGATGAACTGTCTCAGCGAGTCAAAGATC  
GACTTGGGTTTGGGTCCTTCAACATCCCTGCAAGACTGGCATTAGCCCGCTCTTTGG

CCATACCTGCGCTGCCCTCCAAGGTGGAGGGCGAGGTGGGCCGGGTTATCAAGGGC  
GACGTACTGTTTGGGACGGGGGCTGACCTAGCCAGTTGGGTGTCGCTCCTTATCGAG  
CATGCTGGCAGTTCGCTCACCATCAAGGATCTGCAAAGCGTCGTCCAGCGACACTGG  
GCCAGGGGAATGAAGATTCTGTCTGAAGAGCTCGATGCTTCCGATGGTGATAATTCC  
GAGTTCTGGCGCCGTCTGGCTGAGAGCGCGTTGCCAGAGGTGACGGAGAAGCGTCG  
TAGTGGAACCTTCCCCAGTCGTGGCAGAGACATCGCGCGGGCCCGGTCCCCGTGCGCAT  
GGGTGAAATCGGCCACGACGTTTCGAGCAATGAAGAAGTTACTTGGACGCTCAATG  
CTCCAGGAGGCAGTCCTCATAGCGCTTTCATGGGCGGCGTGGGCAGTGGTAAGACC  
CGGACGGCTGCTTTTGTCTTGAGGTCTATCGCTGAGCAGACCAACGTCCCGTTGTTG  
GCGTTCGACTTCAAGGGGGACATGGCGGACAAGCACAACGCGTTGGACAAAGCCTT  
CGGCGCGGTGCTTCTTCGCCGCCGAACATCACTATTCCGCTGGACGTGTTTGCCCT  
GTCAGACAACAGCAAGCATGGAGTAGTCAATACCGCACAGCGCTTGCGAGACAGCC  
TGAGCAATCTTAAGCAAAACAAGCTTGGAGACCAGCAGCGCCGCAGGCTCAATGAT  
GCCTTGAGGAGGCGTTGCGCACTCGCCATCCCTGCACGCTGGAAGACGTGAAAGA  
GTGTCTTGAGAACGTCTACGCGGCTGCCGGGGTCAAGGAAGATGGCGCAGTCTCCA  
TGCTGGTGGATCTGTGCAGGCTTCCGCTCTTTGAGCCCAAGATGACGCCAGAGGAGT  
TCTTTTCCCGGTCTTGGATCATCTCGTTGCCCGCCAGTGTCCCAGAACTCGTTCGAGT  
GACTGTTGTGGCGTTGTTGACGGATGCCTTGGAGCGCTTATCAACTCTAAGCAAGA  
TTCGGACACCGATGCCGAAGGCAATCGCTCGCTCCGCATTATGTGTGTCATCGATGA  
GGCTCACCGCGCTCTGGAAGCCAGGCTCCCAGGTTTGTGCAACCTCATCCGGCTTGG  
CCGTTCGAAGGGTGCGGCCGTATGCTCATCTCGCAGAAGCCGGACGATTTTCGAGG  
GCGAGGACGACGATTTCTTGTGCGGAGATGGGGCTTCTGGTGTGCTTTGGAACAAATG  
CACGAGAGGCTTCGGTCAAGCGCATCTTGGGGGCAGGGGCGTCGTTGACCTCCCTC  
AAGAAGGGCGAAGCTTATGTTTCGCGCCCGCGGCGACATGAAGTCGCGCAAGGTGTT  
GGCATGGAAGTGACCGGTAAAATCAGACTCGCTTCTTTGTTTCCGTCAGTGTTTCTG  
AGTCAGAGGCAGGATAAAGCCTTGCTCGGAACCATCACCAGCCATTGATGCGAGGC  
ATCCACCGAGCACCTCTTTAGAGCCCATCAGGCCAAACTCGAAAGCTGCGCCCAACT  
CATTGAACAAAGGGCCCAGCATGTCGAGTTGTTTCGTGAGTAATGTCACCGACGAGC  
GCCTCTGAGCCGTTTACGGTGCTAACGTGTATCCAGTATGGCATTTCAGCTCCGAA  
GTTTCCGAGCTTTTAGCACCAAGGACGAGGAAGTCAATGGCTGACTACAGAAAGAA  
ACTCACGCTTATCGACTCTAGTGCTTCGAGAGTCATGGTTCTTCAGTGCAATAAGTCT  
GAGAGGAAGTCTTTCGTAAAACACTATCAGGATGATGGAACTACCGCCTGGGCCAA  
GGAGACTGTGGTTGGTTGGCACCCAGATAAGACTCCTAAAATCCTTCATATTGCTGT  
GCAATCTGAGCAGGTCTACGAGGTTTTTCGGTCAGCCAAACATCTCTGGTCTTTATGC  
ATTCTATTCGGACCCGAAAGGAAAGGTCTGGTATTGCCCAATCAGTCAGGAAGAGC  
GTACCGTCCTCAAGGAGGCCAAGAGGAAAGGCAAGACCTTCCGTGACGCACTCGTG  
GAGTTGAGCAAGAGGGTCTTTTAGCTCTCATCGTCGGATTCTAAAAAGCATCCGATT  
GCGTCTTGATATCGCAAGGTTGCGGGTAGCAGGCCCTGTTGGATGCTCTAAGGATA  
GAACTTCGATGCATCTGACAGCTGTGAAGCGAACTGGCCCCGCTGGTAGCGCGGCA  
AGTCCACGTTGGGCTGATAGAGCTCCAAGGCGTTGATCTGCTTGCTGCGCGTCACCT

GGGGCTTCTTGTGGAGGTAGTGCCTGCGCAGCACCTGGACCCGGTCGCGGGGATCG  
GTGCTGTGGCCGGTGACCAGGGCAATCTCCTTCTCCGGAACGTCCTGGACATCGAGC  
TCCGTGGCCAGCGTATGGCGGAAGGCATGGAACCCGATGCCTTTGGGGAAGCCGAG  
GCTCTTCAGGTAGCGCCCAAAGTCCACCACGAACCTGTTGGCTGTAACGCGCATTGGT  
TTCCCCTGTCGTGCGGTTACCCCCAGCAGAGAGC

>CONTIG\_65\_length\_6662\_cov\_15.113542

AAATGGCGAAAAGCAGAAGATCCAAACGCGGCTCTCCAGAACAATGCCATATCCCG  
TACTGTCAGGCTCCTTTGTTTCAGACCTTCCCTAGGTCCAAATTCCGAGACATCCGCG  
CGTGATAAGCCGCCATTTGCGCATGATGTAGCGAGAAATAGGAGCGCAGCAGCATT  
CCGGTTAGCACTGGCAGGCCTTGGAGTTGGGGCACAGAGGTATCATGCTCATCTGAA  
TCCGGAAGCTAGGCAAGCGGCAGCATCAGCCTCTCAGGGTGCTGGCCCTCGGCAGG  
TGACACTAAACTCTTGCACTCCGATCCTTGGTGGGCTGTAGAACTGCCGATACCACC  
GGTAAGCGATGGCTTGGCCCACGTTGCTCTCAGTGCATGCAGGCAATCCGGCTTGGT  
CCCCATACCCGCCGTTGGGCGTGCAACCCTGGCTGACCCGTGCACGTAACGGAGGGG  
ATGGAAGAAACCATCGCGGTGCTCGGCCACTCCCAGTGGTAGGGATTGTTTGTTTTC  
CCAACCAAGTCTGAGGCGCAGGCCTGGCGACAAACCGCCATGGAAGTGCCCCCACC  
GGTCGAGTTGTAGTCGCAGTAGTGCATGCCCATGTTAGACACGCATTCGAAGTCGTA  
GGAGTAGGCGTAGTTGATGTTTCCAACGTCTCCCAACGCGTTGCACTGCTCTGCGTA  
GCTCGCTGACTCGCTGACGTTTCGCCGGCCAGTTCCCTGGGATCGGGGCAGGGGTCTC  
CACGCGGGTCAACCGGAACGTTGTTCAATGCCCATTCAGCCGTGCACTCTCCGCTGA  
AGTCAAACGAACCACTGCGTCTGGATAACCAGTATTGGTTCGCTGAAGACCCCGACG  
CAGGTGGAAGATCCACATAATCTGAGGAATACCACGCCGCAACCTGTAGGCTTCCG  
TCACTGCACCCGCGGGGTTGTGGGAACGCACGTATTGACCGGATTGCGCCGGTTGCCG  
GTATCCGACCAGGCGGACCATCCGCCGACGGTGGGCGATGGAGCCGTGGTGCGTCC  
AGCAGGGCAGGCATAGGTGATGTCCCGAGTATGGACCTGCTCCCATTCCTGCGACA  
CGTTTCCGTTTCATCCCGGAAGGGCACGACCCCGTGCGGGTGACCCACTGGGCCTGCG  
TTTGCCGCTCGTTGGTGGGGCATGCCTGGCAGCTGCTGGCAATCGTTGCCGTCACCA  
CAACAGGGCTGACCCACGCTTCCGGATGCGCCACGCCGCGTCGGTGTTGGGATCA  
ACGCCTTGGTTCGGACAGACGGTGCGGGTGCGAAGCGTTTCCGTCCCCCACGTTCCC  
GCCGGGCACGTGCTCGTCTGCGTCTGTGCCTCTGCCTGCTTGCAAGGCACCAAGGCC  
GGTGGCAGCGGGTAGGGAAGGCCAATGGGCGAGGGCTGCGGCACCCAGGGGATCG  
ACGCGGCCCGGGGCGAGGGCTGGGACTGCAGGAGGAGCCGGAGGCGACACGCCGGG  
CAAAGGAGCGCCTGGTGCGCCGGGCAACGCATCGCCACGTCTGGCGCCGAGCCAA  
TCGGACCAACCGGCATCGCCTGCGGGGGATCAAGGGAAGAACGGGCCCGGTGGAAC  
GGGTAGATCAATAAGGGCGGCCACAGAGCCACCGCCGGCTAAGCCGGAGTAGTAA  
AGCACCTCCAGTCGCTGGCCTCCTTCCTCACACGCGGCCGCCAGTGTCGGCACGTCC  
AGCTGCCCCGCCCGTGTTTCGCTTCGCACTGGTGTTGTCCACGATCACGTCCAGCACG  
GTGGGATCACCGGCCATCGTCGAAAGGAAGGGCGCGCAGGCGCGGCGAGGCACGC  
CGGTGAATGCCACTGTGTAGCTGTCTCCAAAGCGTCGAACGGTAGTCGGTGTGATGG

CGATGGGCCCCGCCCCAAGCGTTGGTCAGCGCCGACACAGACGACGCTTTCGGGAAA  
TCAGTGGGGGCCAGGTTGTCCTCCACCACGCTTGACGCACTGACGTTTCGATAGGTG  
CCAATGACGCCGTAGGACCGGTCTATCGCGCTGGACAAGGCGCGCAAGTTCTCCAC  
GTCCGTTGCTACAAACACGCGCGTGTGAACCCGGGGATAGAAGATCAGAGCTGCAG  
CTCCTATGGCTGCGCTTGCGCCCAGCGCGATGAGCAGTTCTACCAGGGCAAAACCGT  
GGGAAGGAAGGGGCGACGGCGCTGGAAAGAGGCTGTGTTTCATGCTGTCCAGCATG  
TGACAGGAGACGGATTTGGCAAGTCCCTCCCGCGATTGGATGTTTTTAGTCAAATAT  
CTTTCAAATCAGTGGGTTGACAATCGTTGTGTGCATGGTTGCATGGGTTGAGTCGGT  
TTAATGGGTAAATCGATCAACTCATAAAAAGGATGCACCATGAAGGTATTTACGAT  
GAGCTCGATCGACGCGATCACTGATGTGGCGTCGTTTCAGCTCCTGACCCCCAGCCT  
GACGTGCGATCGTTCAAACGGCTTGACCGTCTGGTCAACAAGCGGCAGCGCGTCG  
TCCGTTTGGCCGCCAAAGCCCGCGCCGAGCGCCGCTGGAAGAACGAACGGGAGCGG  
TTCGCATGAGCGCCTCAACCGAGAACCTCATCCGGGCCATCCAAACGAACGATGCG  
ATCGCCTTCTACGGCTGGCTGCACGTGCTCAAGGGGACGCCAGACCTGGATGCCGG  
GGTGGCCTGTGACCCAGGCATCACCCCTTGGCGGTGGCTGCGGTCATGTATGCCAA  
CGTGCTCAAGGCAGACCGCCACCAAGCAGGCCGGTATGCGGCCATGGTTGCAGCGC  
TTCTGGACGCGGGAGCCAATCCCCTGGTGCGGATCGGTGAGCGGTTTCGTCGTTAAGA  
GGAACCACCTTGGAAGCTGGAACAGCGCCGTGTAGCCGATGGTAAGACGCTGGCT  
GAAGTCTGCGAGGGCGTTCTTGCCCCCGCCATGCAGGCCTGGTTTGCACGGTATACC  
GTGGACCGGATGAACACCGAACTCCACCGACACCACCCGGCGTTTCGTTCAATCCCC  
ACGGCACATAGCGGAAGTCGCATGAAGCCAGAGTCGGCGGCTGCTCGCCGCCGAAA  
AGCGTTGGGGAAGAAAAGGCGGGGTGGCCGCGGCTCCCGCCGGGGCCCTGGTGGCGC  
TGAACCCCGAGACGTCTGCATGGCTACAACCCCTAGCTGCACGGCCCTTGCGGGAAT  
AGGTTTGCACAGTAGTGTGTTGCATAACCTACCCATAAAAGGAATCAAAGCGATGC  
GACTGGTTGTCTGTTGCTTCAAAGGGGGCGTGGGCGCACTACGCTTTCGCTCAATC  
TCGCGGCGGCGTTTCGCCGGCCAATCCCGCGTGCTGGTCAACGACCGTGACCCGCAAT  
GCGGTTCCGTCGCATAGGCCGCGCTCTCTGACGAAACGCCGTTACCGTCGGTCGTT  
CCTCCTCCCCAGGGTTTGACCTGGAGATTCAGGACCTGCCGCCAGCGCCCCGGTGA  
AAGATCAGCTTCCAGACGCGGATCTCTACATCGTCCCGACTCTGCTCGATGGTGGCA  
GTTTTGTGGTGTATCTACGCACGATTGACACCCTGCAGCGACAGGGCAAGGCCTTCC  
TGCCAGTGGCCAATCGGGTCAACATGAAGCGTGCAGAACACCGCCGCGGCTGGCA  
GACCCGAGCCTGGCCGGGGCCATCGTCATCCCCGAGCGTGCGGCCTTGGCAGACTA  
CTACGAGCTGGGCGAAACGGTCTTCAGCATGAGAGGCGCAGGCGTAGAAAAGGCGC  
GGGAGGACATTTTGAGGGTGGGTGGAGCTATCCAAAAAAGGTTGACCGACGCGCGG  
GGGACTGCATGATGGAGGCCCGTTGCTACCCCTGCCTGACCTCATGGCTGCCAAGA  
AGTCCCCCACACAGAAATCCACGCCCAAGAAGTTGCCGGCCCGCAAGAACCTGGCA  
ACCGCCGCCAAGGTGGTGCATTCCAAGCCGAAGCGGGAATACGCGCCACTCATCAA  
CCTAAGGCAGTTCTCCGAAGAGGAGCTGGCCGAGCTGATGGTGGCCGCCGGCGATG  
CTTTGGGTCGCAGAACGTATTTGACTACAGCGAAGAGGCGCCCTACACTCGATCCG  
GGCAGAGGATCTATCTGGAGGTGGGCCGCGATTCAACGATGTTTGACTACCGCGAC

GAGAACGGGACGCGTGTGGAGCGAACGATGGTCACCGTGCCGCCGAAGCTCCGCGA  
GCAGATTCAGGACGTCACCGGGGAAGAGCAGCCTATCGTTACCACAGCGATCATCG  
CGTTGGCTTCCTGGGCCTGCCAGGAGCTCAAAAAGAGCAAGCGGCGCTTGGTGGTC  
ACAACAGCAGCCGATGACCTGGATCCGGTGCGCAAGCAGGTCCGGAAGGCGATTGT  
TGGACAAGCGCGGAAGAAGAAGTAAAACGAACCATTAGGGGGCAGCTTTAAAGGG  
CAGGTATGAAGAAGCAGTTGGAAAGAACGCAAAGCCGCCTGCATAGAGGGAGGAT  
CAAGGCCTTTGTAAGTCGTGTCGCATGGTTAGATGTTGAGCATAGGCTTCGTCGACT  
TTTCAACGAGGCGCAAGGCTTTGAGTGTGGCGAACTGGGCAGTATTTACTTGTCTAG  
CCAAAGGGACGTGCCAGCACTGAAGAGTGCTTATGCAGACTCCGTTCTAAACACCG  
TTTGGATCATCATTGGCGGTAGGTCTCTCAACGTCGATTATCTGGATAAAGACCAGA  
GAAGGATGCTTCTCTCTGAAGACGGAGGCCAGCTCTGGTTCTCACAGACGCAACA  
GGAAGCATCACGGTGTTTCATGTCGCCCTACAAATCCAAGCACATGAGGATGAATGA  
GAATGAGTTAATTCTTGCTCGCTATGGCTGCGCAACAAGCCTCACGGAGAGAAAGCT  
CCGAAAGCATTTCAAGACGTTCTTCCGATATTTGGCTGTTACAAGTTGTCACGGTGA  
CCTTGGCATTTCGTGGCTACCTGTTTAGGGTGAGATTGCGCATGAATGACCGACGTTT  
CGCGACCGAGTGGGCATCAAACGCTCATAAGGTCTATGTCCCGGTTCTTTTGGCCCT  
GATGGGGCTCCTTGCGACGCTTTACACGGGGAACAGGTTGAATTGGCTAACAAAGG  
TATTCGGGTGACGACTACTGTCAAGCAGAACTGGATGTCCAAGTATATGGGTGAAA  
CGAGCCTTCGTCATCAGCTAGTTGAGGTCACCTTGGCCTGGGAGGCGACCTTCGGTA  
ATGCCCCGTCCATTACCACTGTGCTCTCCGAGCACGACGCTGCCATGCTCCTGGGCT  
GTCCGATAGTCGATTATTCCACCAGCATGAAAACCGCCACCGCAGTCCAGCGAGGT  
CACGACTTCGTCTATCAAGGCCTGCGCTACCAAGTGAAGGGAAACCGCCCCAGTGG  
GAAGAAAGGGAGCACGGTCACTTGGGTGTCCAAGCCGCGAAACTACAATTGGGACC  
GGTTGGTTTGGATACTTTACAACCCCGCCTACAAGGTCCAGGAAGCCTGGCTCTGGG  
AGGTGGGGGACTACAAGGCACGTTTTGATGCAATACAGCGACTAGGGCCCCGCGCAC  
ATGCGTCTGGGTCATCCGTTGGTGCCAGTCAGCTGAACCCACAACCTATCGCGTGTTC  
TGGAGGACGGAAGTGGTGCCGTCTTTTTTGTGCTTCCGGTTTGGCTGAAAAGGGGCGAG  
GTGCCCCCTTGGGGCAGATGAGCTGGACTGGAGTGAGAGAGGGGAAGCGGTGGCTGG  
GGCGGAAGCCCTGGCCTGTGCCTTTCCCTTCCCGGAATAGGGCTTTACAGGCGCGGCG  
CCGCCGCGTTCTTTTTTAAGCTTTTTTAAGCAAAAAGGCAAAGTAAAAAGCGGCTAGAGC  
AAAAGCGTCTTGGATGAAAAGGCGGGAGGGAGTGGCGCAGCAGCCACTGAATGGT  
GTATCAAGATCGGCACCATAAAGCTAAGGATGGACATGAAGCAGATTTTGGGCGTT  
AGGTATGCATCGCCGCTCGAGCGGGAATACGAGGCCTGGGTGGTAGCCGGCATTGA  
GAGCTACCTGAAGAGTGTGGGGCTTCGATACGCCATCTGGGCCATCGGATCTTCCCA  
GGAGAAGGTCTGGCCCGCGGATGAGAAGCTCTCAGTCGGTTCAAAGATCGTCGGGT  
TGCAGTTCAAGCGAGCCAAGCTTGCCACCAGCGGAGCAGTTGGAAAAGATCGTCTG  
AAATGGACCTTTGACCAGCCGGCGGGCCAGCTCGCGTTGGTGAGTTCTACGCCGGA  
GATCTTCTATTGTTTGCCTACCTTCATCAATCGTGATCTACGGTCCGAGGCGCTGCAC  
CACTGCCTGTTCTGGCGGCCTGATCCGGCCGATCCGAATAACAATGCCTGGTATGAC  
AACAAACAGCAAAAAGGTGGAAACGCCATATAAGAAGTTGGATGAGAGCATGCGCT

GGGGTCTCTTCTTCGAACGCCTGATGTATTGCGATATCGGTAAGAAGATAGGTGGCG  
GTGGAGACATAGATAACCTTACGGCAAAGATCACCGCCTTCTACCAGCGCGACACG  
CTCCTAAGGGCGCTGAAGAGCGAGCAGGAGGGCGATCTCGAAGGTGAGGATTGATA  
CGCCCAGGGTTCCGTAGACACTCAAGACCCTCGTTGCGCGTAGCGCCGTTCAAACCTC  
TACAGGGGACAGGTCGCCAGTTGAACCGTGGCGACGGTTGGGGTTGTAGAACATCT  
CGATGTAGT

>CONTIG\_66\_length\_6574\_cov\_18.246316

AGTCGTTTGCGGTCTATCCGCTTGATGTCGCCGCCAAGGCGGGTTCAGCGCGGGCAG  
TTGAGCAGCTCATGGAGTTTTGCGACGCAGAGGATGACGAGGCATTGGTGCTTGCTG  
CCAGGCACGGGCATACGGAGTGC GTCAAACGACTGCTCAAAGAGTGCAGCCCTCTG  
CAACACGACTCACTGGCGCTGTATGAGGCGGCGCGCCATGGTCACGCTGATGTGGT  
CTTTCAGTTGGTGATTTTCTCAGACGCCAAGGCCCAGGACAGCAGGGGCCCTGCTCGC  
CGCTTGTCGGGAAGGCCACTTGGATGTAATCAAGCATTTGTTGCCTTTCTCATCGAA  
GATCCAATGTGCGCAGCGTGGCTTTACAGCTGCGGCCGAGAACAACCATGCCGAGG  
TCATTGAGTTCTTGATCGAAGCTGGCCTTCCGGATCCGGAAGACACGTTTTCGTTGG  
GTCTCAACGCTGCCGCCTCCAAGGGATATGCAACTTTGGTGCGGACTCTGCTTTGGG  
CGATCGTCGGAACAGGGCATGCACCCCGTGATTTTGGTCGGAAAGCGATGCTCACTG  
CGGCAACTGCTGGCAATGCCTCAATCGTCAAGTCGGTTTTGGAGTTCGCAAATAAGG  
CGTCATATCCAGAGGAAGGCCTGGTTGCAGCGCTTCGAAATGACCACCGTGAGGTG  
GCGGATATTCTTGTTTCGTGCGGGCCGATGTGGAACACGTGCGGGATTTGATCACCGAC  
GAAGAGATCGAAGCCAAGCTTGATGAAGCGATTGCCAGAGTTGACGCAACTAAGCA  
GCACAGAGAGCTTCAATCCAATGAGCGCCAGAGAGTTGCGCAGAGTAATACGTCCA  
GTTCAGTAGAGAAGCACCCAGCACGCGGCACACGCTTGTAAGCGAGTGCTGTAGCA  
TTCCAATAAGCATGCCACTTGTAATGAGAAAAATGGTGGTGAGCGCTCTGCAACCA  
ATTGGAGCGGCCAGCTCTGTTGACGACTGCTTGAGATATGATAAATTGAATTTGCCA  
AGAGATTTTTTTGTGCTCTACTGCGTGGAACAAGTAATTTTAGGAGATTGAGATGA  
GCGATAGTCATAATGATTGGTTAATGAGGGTTTCGAATACTCAGCGTCGTATTCGAG  
AGGGGACTGAGGAGCTGATGTCGCTGGACGACTATCGCAAACCTCAGAGCTGAGAGG  
AAGCGGCTCGCTGAAGAAAATGTGGAGGTTGGCAAAAGCTCTGAGGTAAAGCCAAA  
GAAAACAATTCCTTAGCCGAAGAGAGACGGCGATCGTTGATGGATCAACCTGAGGG  
AATGACGTGAAAATCTATCATGTGACAACGACTGCAGACGCACGGTATCAACTCGA  
CGACTTGGAGGTCATGAAGACTAAGACATTGGGATCTGATGCGGCAAACGCCTTCG  
TAAACGAGCTCCTTGACGATGCTGAAGCGCTTTCTGAAAATCCAGGCCGGGGAAAA  
ATTAATAAAATTGGTGGAATATTTTTTCAGACAATCTTTTCTCCTAAAACCTGGTTGGC  
ATATCGCCTTCGAGATTGATGAGGTAAATGCGGTCGTTTATGTTCTTGGTTTTGAAA  
AATAAGTTGTAAATTGATGGCTGTTTAATGGGTGATGTATTAATCAACAGTAAGACT  
GACTTTGGCTGATTGCATTTAAGGTTTTTTTTTAAAACAGGGTGAGCACGGGGAGT  
AACGCCACCATCAACGCGGTGCCGAGTGAAACAAACGCTGTCGCCGACAAGCAAAT  
GCTCTGGTCCGTAGACACTGTTTGCATGAAAGAAAACATCACCTGATCAGAAGTGA

TAAAGCCAAATTTCTTATGGTCAAATATGCGTCGAACTTTCCCATGCTCACGATGAG  
CTAAGCTGTAATACAGGTCCCCACAAGATTTGACGAGTTGATCAGCTGTAGGGCGCT  
CGTTAGGATTCAGCTTTAGGCATGACATTGCCAGTTCAATTGTTTGGTTTACTAGTGG  
CGCAAATTGTGGATTCCGAGTCACGTGGTCAGGAACAGCATCCGGGCACAGCTTCTAG  
GATTTTTCTCACCGCTTTCAAGCCTTCTCCAAAAGGCAAGATGCCGGTTGAGATATG  
GAAGAGCATAGCCCCGACTGACCATATGTCTGCCTTAGTCGTGATCTCTTTTGGCGT  
CTCTATTGCTTCTGGAGCCATATAAGGGAGAGCACCAACAGCCGTGTTGGATAGCAG  
CATTGTTTCAGGTCCGCCAGCTGCTGCCTCGTCGAGCACATCGCTAGCCATTTTCGC  
AATTCCGAAGTCGGTAATCTTGATTTTCGATCAGATCAAAAATCGCCCGCGATCATGAT  
GTTAGTAGGTTTTAGATCGCGGTGGATTACTTTTGCATGATGGGCAGCAGATACCCC  
TTTCGATATATGATGGAATAGCTTAGCGGTGAGGTATGGGTCAAGGTTAGAGCATGA  
GTTCAAGAGCGATTTTTGTAAGTCTTGTCTTCAATAAACTCTTCAATCAAAAATTCT  
TTTCCTTCCTCGTTTACATAGTCAAGCGTTTTGGCAACGTTGGGATGATTGACCTGCG  
CTGCAACTACAGCGCTTCGCTTGAATCGTTTGCTTGCGGAACTGTTTTTCGGTGTTTT  
TAGCGCAACAATTCTGCTTGTTAGGGTGTCGGTAGCACGATAGACAAACTGCATGCC  
GCCCTCGGCATGGTAATTTGTTACTCGATATCGACCGCCAACCTATTTTCATCAGCGCG  
CAGCGGTCCATTCATACGATTACCTCCGGGTGCGAGACATCAAAAAGTCAGGAATAT  
GCGTGTGGCACCTCTGGTTGGTGCACCTAGAGCAATGACGCAAGACCCCGGTAGTTC  
TTGTCCTTTGACTGCTGGTGCATAATTAATATAGACGTCACCTTCGACTTCCCCTGCA  
AAGAAAAGTAGGCCGTCATATCTTATGGTGATCGACCCAACGCCATCCCAGTTTGCC  
CGAACTGCCCTTCTCTCGCTATGTAGATAAGACGCTTCTCCCTTGTTGGACTAACAGC  
GCTCGATGGCGATTTCTCAGAAGATCTTTGGCTAAGGTCTCCCTCACTTGGGTCATA  
GTGGGGCGAGCATTAACCTTCGACAGCGAGGCAGGACTCGATCACTCTTAGTGCGCT  
ATCGGGTAATCCGCATTTAAATTCATCAAGAGAATTGGCAGGCAGGTCAACGGGGC  
GTGTTGGTTTCTGCATGTGTTTGGGAAGGCTGCCAGCAATTATATGAAATGCAGTAG  
CGCCAAACCCATAAACATCTACAGCTGCTGTGAACTTTGGATTGTCATCAAAAAGTT  
CTGGTGCGGCAAACCCGAAGGTCCCCACAAATCCCATTGTAGAGGCGCTCGTCCCTT  
CATCTCTGGCAAGCCCAAAGTCAAAAATTTTTATTACACCTTCCAGGTGCTGTTTAAT  
GTTATTGGGCTTTATGTCGCGATGAATGACGCCGGCCTTGTGTATATCTTCAATGCCA  
GACGCAATTTGCCACAATTGCTTGCAAAGTTGGCCAGAAGATAATGTGCAATCTGGC  
GTGTCCCATAGGTCTGAACCTTCCACATATTCCTGAACTATTCCTTTGCCTTTCCCTA  
CTCTGATGATGTCGTAGACCTGCACCACGTGTTTTGATCGGAGCTTCAGAAGAGCGT  
CGACCTCATCAATGATACGTCGTTTCATTTTTAGGATTGTGAATGACTTTTATCGCAAC  
TTTTCGCTCTAAGGTTTGGTCATAGCAAAGGTGCACTGAGCCCATTCCACCATCCAG  
AGCAGGTCCCAAATTTGATAGCGATCTGGAAACATCCTAATTCCTCAGTGCATTT  
TAGAATTAATCATCTTTCACAGATGAGAAGTCAAGCTCTAACCAGGCGTTGGGGCA  
TCATCGATTTCCAGTTTCCCGGACTTTTTTCTTGCGCGCGTCGAAGAACTTTTTGCCT  
TGCTGGAAGTTTTCGCTGCTTTGCGGAGACTTCCTTGTCTCAGGTGACGCAGTCTCATG  
CCTAACAGCACTTGTTCTGCATGGCTATTGTCGGCGGATCTTAAAGAATTAGGCGG  
TTCTGCAGCAGGTTGTGCTTTTTGCTCTAATCTCGGTTTTAAGGCTGTTGCAGGATGT

AAATATAACTGCCCCAGTGAATCCCAAAGTTCTAGATTTGAGCTGCCCCGAATCGGGT  
ATGGGCGTGAAATCTAATGGCAAAGTTGCAACTATAGCGGTAGAGTTATCTGGACC  
CCCCGCCCATCGCGAAAGTTCGACTAACCGTCTAGCTACGATACCTTCGTCTTGACC  
TATGGCTTTATTTAAAGTTATTAATGACAAAAGCTTTGCGTCATGAGACGTGAAGTA  
AACTCCGTCCGTGCATAAACTAAACGATGTGGTGTCTTGCTGTGCGAAAGCGCTGAT  
CTGCAGATCTAATGGAGACTGCATGCCGATATATTGAAGCAATTGCGACTGCTCTGA  
GTTGTTTTCCCTTTGTGCGCCAAGTTGGCCTGCAATTGTGTGTCATCTTTGGATATTTGG  
ACAGAAGCTTCTTCGGAGAATGCATAAATCCGACTATCTCCAACGCTGATCCAACCT  
GATTTTCCTACTTCACTTATCAAAGCTGCAACTAAGGTGCTCCCGCCTTTACCTTCGT  
AAAGATCACGAACTATTTGGTTAGACGCATGAGCGCCCTGTTCAAGCCAAGAGAGG  
GGGTCGCTAGTGCCAATTTGCGCGTGTTCATGGACCGTAGCAAATAGCGCTGCAATC  
GCGGTTGCAGCGCACTCCATCCCGTCCCGCATCCCACCGATGCCATCAGCCAGAGCA  
AGTATGAAATAAGAATTGCCATATTTGTCAGCGCCTCTACAAATAGCAGAGCGGTCT  
TCGTTATGTTGTGCGGTAAGACCAACATCGGTGGCAATTCCTATGTAAACGGAGCG  
GTCTTCCTTGAGCCATTCCGGAGCGGGTTCGCGGAGAAGCCAGCGCGCAAGTTGGAG  
TGAAAGGCCGCTCGATTTGTAGTTCATAGTTTTTAGAGTTGAAGCCATGCTCCGGAT  
CATAGTCGATTGTGGCTAGGGTGGGTTTGGCGACTTTGACTGTAAAGCGTGCTCAAC  
TGTTGAGCAACGTGCTGCGCTGTGTTGTGGGCGTTGTCATGGCCTATAAAGCCCTTC  
TCGAACTGGTGCGTAGCTGAGTCTTATGGATACATCCTTGCTCCCTTCCTCAACCTCT  
CCTTGAAGTGGCCGCGCACGTAGCTCGGTAGTGCCACTGACGGCTGATACTGAGCCA  
GCGCCTCGATCTGGATCTTCCGAACATTCCCTGATGACTTGTGGACATAGTTGTCTTG  
GAGCACC GGAGCCTTCTTGTTGAGGGCATGACCTGTGATCAGCGCAATGTGCTCAAC  
CCTCACGCCTTTGGCGTCGAGCTCTGTGGCAAGCGTATGCCGGAACGCGTGAGATCC  
AATGCCTTTGCCAAAGCCTAAGCCCTTCAAGTAGGCTGCAAATTGGTTCACGAAGCC  
TTGGCTGTAGCGCCCGTTTGGTTCACCCGTCTTGCGGCAGGTGCCTGCTGACAGGTT  
GGGGAAGAGACGCTTGTGGCCACTTGCTTTGATGTCCGCCAGGAAGTCAAGTAAGC  
CGGCCTGGATGAGGCTTGGGTGGATCGGCACCTTACGGATCGCACTCTTGCCTTTCA  
GGCTCTGACGGCTTCGCTTGCCAGCGCTTTGCGCGAGATCTTCGTCCACGGTCTTCTG  
GATCGAGAAGCACACACGCCTTGGTCTTGACGATGTCCGGCCACTTTGAGTTGGGC  
GATCTCGTTGATCCGAGCACC CGTGAAAAGGGCAATGAGCGGACACCACCAACGGT  
GCGGATACTTCTTGGCCCAAGGCAGGAAGGTCTCGGGGTTGAAGATCTTCTGGATTT  
CCTCTTGCGAGAGTAGACGCTCGGGCTCGTCCTGATCAGCGAGTAGCTCTTCTCTGG  
CAGGCTTGAATGCATCCATCGGCGAGTGCGGGATGGCATGCGCTTTGGCTAGCGTGT  
TGAAGAAGGAGGCGAGGAAGCGCCGGTGCAAGTTCTAATGTAGCGTTGGCAGGCTGC  
GCCCCGCCCAGACGTTGACCTTTGGCGATCAAGGCTTCGACGCTCAACCACTGATGC  
TTGGGGTTGGTCATGAAGTCTTCGGGTGCCCATCGCAGCAGATCCCACATCTGGTAG  
ATATGCGTGTGATCAATCCGGGCAACGGACGTGTTGCCACTCACGCGCTGCAAAATG  
GCAAGCGTTCGACGATAAGCTTCGATCGTGGTGGTGCGAAGGTTCTGCCGCTCCTTG  
TCTTTGAGGAAGTCGTGACCTCTTCAGAGAGGAGTCGCGCCGGGGTGGCCAAGGG  
CAGGGGCTCAGGATAGCGAGTTCGGGATCGGCGAAGTCGTGCGAGCTTTTCATGATG

GTCGTAGGTCCCTTGGACCAGGTCCTGAAGGTGAAGCGCGCCGGCTCGGTCTTGAAC  
GACCATATCTGTAAATTCGACTTTGCCGATGCGAATGCTTCGGATGGATAACTGACC  
TTTGGGCTGTTGCAAATATTGATGAAGTTGGGAGTGTTTAAAGTGCATCTACGATCC  
AATTATGAGGAGGTAGACGTTTGATA

>CONTIG\_67\_length\_6487\_cov\_292.220440

ATTCGTCTATCGATGGGAGCTCTCGAACGATGACGGCCTCCCGGGTGCGCACAGCCG  
GGGAGGGCCGTAGAGGAACGTGCTCCAAGGATTGGACGGCGGTGCCCTCCGCTTGAA  
GGTTTCCTCTGGCTGTAGACGATCAGTGCGCCGGCGGACGCCCAGGCATTGCAAAC  
ATTCGTTGGCGCACCCAGCGGATCGTCCGCAAGGGTTTGGCTCATCAGCCCTGCGAG  
CAGTTGGCCAGCGATTTTCGAGTTGTTTGGGATGGGTGGTCATGAAAACCTCCTACGTG  
TGTGGGTAAAGTCCCCATCCAACCAAGAATTGCCGCTTCCGCAAGAGCTCGCTTCGGG  
CGCCATTTACAAATTTGAATACGAGTCGAAATCTGATAGCTGATATGCAATTTGAC  
GATGGAGGTGTCGCGAATGCGGCTTGGCTTCTCGTTTTTTCGTAGACGCAGGCGGGC  
GGCTTGGGCGAGACAAACGAAGTCTTCAAGCTGGGGCGGTGATCTTCGGCTTGCGC  
GAGGTGCTGACCGGCCAGCTGCCGGTGTCTTCACTGCGTGGTTAGCAGGTCGCAGTC  
TTCACCATGTTGAGCACGCCGGGGTGGCTGCAAGCGGTAGTGGTAGTGCGAGAAAC  
GGGCCGTCGTCTCACTGCTTTCGAGTAGCGGACCGCAGAGCTGACTCAGGCCCAAGT  
GGTAGCGTCGCCCCGAACGAGAAGCGTCATGCGCTCGGGGACCAGCCATCCGAGCTG  
AGCATCTGAAACCGTTGAGTGCGGCCTCGGCGGGACGATTGAGGGTTTCGGACTGAA  
GGCATGCGGCGCGTCCACGCGATCTATCGATGGCAGTCCAACCCTCGAGCCAGACC  
CGCCGAAGCGAATCCTCGTTCTTCGCGGACCCTGGTTCCACTGAGGCCGCGGAGATG  
CGCTGCCCCGAAACCATTTGTAGGGCGGGTCAAAAGCCCTACCCAACCGAATGCATC  
TTGCGCACCAGTCCCGGGTTGCCTGAGAAACGCGGACCAAGACTCCTTGCAGCTCA  
ACGGCTTGCGGCTGCCCGGAGCGCCAGAATTCCGTAATTTGCTGATTGTATTGGTC  
GCGGCGAAAATGTGGCGGGGACGGTTGCGACCAGTAGACACGTAGACACAAGGGTC  
GTGCGACGGCGCAGTCTGTGAGACGAGATCCGGCTACCCTCAATGCTAGCGTCCCTA  
GGCTGTTTCAGGGCGCACTCTCCCTACGCCCCAAACGGTCATTTTGGCGGCTGGTCC  
GCGACTTACGAACAAGGCAATCGCATGAAATACGAAGAGCTGTCCAGAGCTGCGCT  
CATCAAGCTCCTGCAGGATCACGACGCCGAGCGTTTTGACTCAGGGAAGGACGGCA  
TTGTTCTGAACTACACCGGTCGGACCGCTCCTTGGCAAATCGCGCGCCAGGTGAAAC  
CTCGGATGTTTGAGTTCAACAAGCGTGCTTCGGTTGGCAGCGCTGAAGAAGAGTGCG  
TCAACGAATTGTGGGACGGCGAGAACTTGTGACGATGGTTACGCTCTACAAGCATC  
GCGGCCAAGTGGATCTAGTGCTGACTGATCCTCCCTATAACACGGGCGAGGACTTCC  
GCTACAACGACAAATGGGATAAAGACCCTAACGACCCCGACATAGGTGATCTGGTT  
GCCAAGGACGACGGTTCACGTCACAGCAAATGGCTGCGTTTTCATGACGCCTCGGCTT  
TGGATGATGCGAGAAATGCTCAAGCCTGGCGGGGTGATCGCCATTTGTATTGATCAC  
CGAGAGCTTTACCGCTTGGGGATGTTGATGGATGAGATTTTCCACGAAGAGAATCGC  
ATTGGCATCATCAATTGGCAGAAGAGTTACGCGCCAAGGAATGACCAAAAGCATAT  
TTCTACAGCTACTGAATACGTTTTGGTCTATGCCAAGGATATTGAGCGGGTGCGGAC

AATGCCGCTACCTCGAACCGAGACAATGAACTCGCGATACGGCACCTGGGACGGCG  
ATTCGGACCCTTGGAAGCCAGGAGACCTGACTGCGCCAGGCGATACCACGCACCCT  
ACGATGGTCTACGCCATCCAGTCTCCTTTCCTGAGTTGCACTATCCCTCGCCTG  
GACGCCATTGGGCTACCGAGCGTGCCAAGCTTAAAAAGCACCTGGAGCAGTGGGGG  
AGCAGTTATGCCGCAGTAGACTTGGGTGACGGGCATCCGCAGGCGTTCCTTATAAAA  
GGTGCGCCCATTCCTCGGAACAAAAGACTTCAAATCGGATCACCCAGTGCTGATAAA  
GGCGCTTAAGGAGTCAACAAAAATCCGCGAATCGGGACCCTGGCCAAAAGCGCATT  
GGCGCGATGGAGGCCAGGGCACATTTGGGATGAAGAAATATCTCAAGGATGTGAAG  
CGAGGCATTGTTCTACCACCTACTGGTCTGACGATGACTACGACTCACCTATGGTG  
CTAGATGGCGTTTTCGTGGGATCACACGGAGTCGGGGCACAGCCAGGCTGGTGTCAA  
CGAACTTACCGCTGTAGTTGGGAAGGGACACAACCTTCCGGACCGTCAAGCCTCTAC  
GTTTGATGAAGAAGATCATGCAGATCTGGTGAAACCGGACGGTATTGTGATGGAT  
CCCTTTGCTGGTTCTGGCACTACTGGGCATGCGGTCTTGAACCTCAATAAAGAGTCA  
GGATCCAACCGACGTTTTATTCTCATCGAGCAAGGTAATGATGAGAAAGGGGATCA  
CTACGCCAAGACGCTGACAGCGGATCGCATCAAGCGCGCCATTACTGGGAAGTGGA  
AATCGGGAGATCGAGAGCCACTTGGTGGCGGCTTCCGCTACTTCACGCTGAAGCGC  
GAGAAAGTCGATGCCAACGCAGTGAATGCATTGGCCCCGGAAGAGATGATGGACCT  
GCTCTTAGTTAGCTACTGGGATCGCAACGATAAGGCCAAGTCTTACCTTCGGCGGCT  
TCCAGCGGGTGACCACAAGCACTTGTGTTGCTGTGAATAGTCGAAACGAGGGGCTTCTT  
CCTCGTTTGGAGTGCACCAGATCAGCCTTCGACGCTGACGCGCGCCGTTTTCAAAGA  
GATCGTCCAAGAAGCCAAGACAGCCAATTTGGCTGGTCGTTACCACGTCTACGCCGC  
GCTGGCTCCTTACACCGGCAATGACATTGAGTTCTATCAAATTCCCGACAAGGTGCT  
GGAGCACATTGGTTTCAATGCCCGGGCGGACGCTTACAACAACGATGGTGGCATGG  
ATGCAGATTGAACTAAAACCGTTCCAAGTTCGCGCGGCGCAGCAAATTGCTGATCGT  
TACGCTTTTTTTCGCTGGACACTCTTATCGGCCTACCTACAAAGGGAAGCTGCGTCGG  
CCCTTTTATCAGGCGTTGTCTGGCTATCACGGGCGCTGGGAAGACCCCGGTGCTCGCA  
GAAGCCGTCACCCTGATGCGCATGCACATGGCGATGGAACCCATTGTCTTTTGGATG  
AGCAAAGCCAAGTCGGTGGTCCAACAGACCTACACAACTTTTCTGGGGGCGGGAA  
GTATGCCGGAGTGGTCGACGAGTTCAGGGTTATTTCGTGCCTCGCAGCTGGAGCCAAG  
CCTTATCGCCGATGGCAACTCTCCCCTAATTGTGTTGGCAACCACTGGACTGTTTAAC  
AACAAGGAGCAATCAGACGGTGCTCTGAACATCTACAAGAAAGACGAGGACCTCTT  
CGGCGATCAATCGGCGTGGGAGCGACTCATTGCCCCGTGACGCAGGTGGAGTTCGGC  
GTCCCCTTATCATCGTTTACGACGAAGGGCATAACCTTTCCGACCAGCAGACCCAGA  
TTCTTGCCGAGCTGGAACCAGAAGCCTACCTTTTGGCCAGCGCCACACTCAGGCTTC  
CGTCGGGATTCGCCAAGACGGTCATCGCTCCACAGGAAAGCTGGGTTGACGAAGCA  
GCTGAGGATGATGCCAGTGTGAAGCGTTTCGTTGAGCTGGGCGCAGTGGGCGATAC  
GGGATTTCCGGACGCCAACGCATTTGCCGTTACCTTGGTGGATAGCAATGCTGTCAT  
CAAGTCAGAGCTGATCAAGACTTCGATTTCAGTTCGACGGCACCACTGCGCCAATGG  
AGCGCTGCCTTGATGACCTTTACGATCGGCTTGAACCTGATTGAGCAGGAGATTCAGG  
TGCGCTCACTCGGATTTACGCCTAAAGCCATCTATGTCTGTAAGACCAACATTACTG

ACGACGGCGACAAGGATGATCACACCAAGCCCTTTGAACATCGTAATGCGCCGCCA  
ATCCGCATTTGGCGCTACCTAGTCGAGCAGAAGAAGGTAGACCCAGCCAGGGTGGC  
TATCTATGCCGACTTGAAGTTTGCCGACGGCAACAAGCCGGAGGCAGTGAATCTGTT  
CTCTAGGGGGGAGAGCGATTTTCGATGAATTCCAGGCTGGGGACTTCCAGCACATCAT  
CTTCAATCAGGGGCTTCAGGAGGGATGGGATGACCCGGCCTGTTACTTGGGCTATGT  
CGATAAGTCCATGGGATCCCAGATTAAGGTGGAACAGATCATCGGACGGGTGCTCC  
GTCAATACGACGCCAAGCACTACGATTCTCCGTTGCTGAATAGTGCCCACTTCTTCTT  
GCGCGTCGACAAGAAAAACGTTTTTCACGGAATCCATTGAGGCAGTGCGTGCCAAGC  
TTCAGGAATCTGGGGCTGCCATCGAGATTGTTCAAACATTTCGGTGGTGGTGACGGCG  
GCTCCGAAGACATCAGTCCTAGGGACAATGTGTTCGGTCGTCCTTCATCAAGTTCACG  
CCGACGCGGGTGACGCTGTGGAGGCCATTGCTCAGTTGGTCGCCAAGTTCCCGACCT  
TTAAGGAAGGAGAGGTCGATACCCACGGCGATGCCACAATAAGACCGAATTGGTG  
GTGATTTCTGACCTCGACAAGGAAAGCGGCCACGACTGGATGGTAAACGGACGCGC  
TAACCGCGTGCGTCTGCGCTGGCTGGTGAGCAATGCCATCCGGAGTCGCTCCCGAGC  
TGCCCTTGCCGTAGTCGATCTAAAGAATTCTAAATTCGATGTTTCGTGTGGAAGCAGG  
AAGCAATGCGGCGGGCTGCGGCGGACAACCTGGCGCGGGACATCGTGTCTATCCTACT  
ACCAGCTTACCTCACTGGTTTACGAGTCCGAACGCGAATTCACATTCTCAACAATGC  
GGGTGCCCAAAAAGGCGCAAGCTTTCGACAATGGGCTCTACCCCCGCTATGCCGGC  
CTCAATAAGTTTGAAGCGCCGTTTCGCAATCGCGCTGGACAAGTTAGGGCTTCCTTGG  
CATCGGAATCCGAGCAGCGGCGGGTTCCGAATTCCGCTGCTTTCTGAAGGTGACAGT  
GCTTCCTTTTCGCCCCGACTTTTTGGTTTGGAAGGGAAATATGTCTTCTGTTTAGACA  
CAAAGGGCTCACATCTGCTTACCGATGCCGTGGCTCGCAAGTTATTTAATATTGAGG  
ACGAGGGAACAACCAAGCTTCTGACGCGATTTATTTCCGAGGGCACGCAGACCACT  
ATCGGCGGCAAGGCCATCCAGGGCGGTTACACAGTTTGGAAGATGAGGACTGGTTC  
GCCTACTCCAATCCATGTGTCTTTGGATCAAGCAGTGAAGGAGTGCTTGAAGCC  
ATAGCTCAAGTCGCATCTATGCCATAAAGTGCTGGTCTTCAATGCAATGTTGTAAAT  
AAGGAGCCCCGTTTGACGGGGCTTTCCTGTCGTCTGTAGTGGTTTGGGCATCAACCC  
TGTTTCTGTTCTTGCTTTGCGATAGGCGAGATGACGAGCCATGTCATACTGAAGGTG  
CGTGAGTAGTTCATCAAATTCAGGCAGTGAGTCATGATCTCCGACTTCTCATCTCCA  
AGAGTTTTTAACCTCATTATTTTTTTCTGTGCTCCAAGTATTTTGAAGTACGCGCGC  
CACTTAGGAACTCTAGTTCGTGCCTACTCGATCGGTCTGCGGCTTTCATAGACGTG  
CCAAGACCTTTACTTGGTCTGCTTCTACTTGGTCTGCTTCATCGCCTTGGCGCGTAGT  
GCGAAGTAAGTTCGAGATCCGCTCTTGTAAGCTCTCTTCGACAATTGCCTCTGGCTC  
AACATTCGCGACACCGGCTCCGAACCTAGAAAGTTCCAAGCCTTGTGCGTCGGGGCC  
AAGTTTCGTGGCTGTGGGAAATGTGCTCTTCTCTATAATGCGATTTTGAAGGGTTGC  
GGAGTAGAGATTGAGCGCTTTGTGGAACGCTGGTGCCGCGTAGCATACAAGTGCTTT  
AGGCCAGCTAACACTGAAAGTACCAAGAGGCGCTGCTGCTGCGCAGCTTTAATATT  
AAATCGCCAATGGGGGGACTTTAAGCCGGCAGCCGCCAGCGTCGCCGTTGCTTTTAG  
CCTGTAAGCTTTTGGTCTTTTCGCTTGAATGAATAAGTTAAGTTTGAAGTTGGGCAGT

GGGCGGGTGATTTTGGGGTGGGCGGGGTACGACGTCCACCCAATTTTGAGTAGCGC  
CCCAGTTTGGAGTCCAATTCCCTACCC

>CONTIG\_68\_length\_6417\_cov\_24.387122

TCTAACGGAGGGCTAAGCATGTAGTGCTGGGGATGGAGTGCTTCCGGACGGCGGTT  
CGATTCCGCCACCTCCACCAATGAGCGGATCTTGAAGATCCGAAGAAGGCCGGGA  
ACCCCCGTAAAACAAGGGTTCTCGGCCTTTTTTATGTGCGCCGTGGTGCGCTAGTGA  
ACGTATCAGCTTGTGAGACGTTGGGGGCATATTTTGGGGCACCTGCCCCACCTGCCT  
GCCAGATGCCCCCACTGACCGATCTCGCAATACGCCGCGCCAAACCTGCCGCAAAG  
ACCCAACGCATGTACGACAGCGACGGGCTTTATCTAGAGGTTTCGCCCAAGGGCGG  
GCGCTGGTGGCGCCTGAAGTATCGGTTTCGGCGGCAAGGAAAAGCGGCTGGCCATCG  
GCGTCTACCCAGACGTGCCGCTGGCACTGGCCCCGGCAGCGGCGGGACGAAGCGCGC  
CAGCTGCTGGCCCAGGGCATCGACCCGGGCGAACACCGCAAAGCCGCGACGGCAGC  
GCGGGCGATTCTCGGCGCCAACACCTTCGAGGTGATCGCCAACGAGTGGCTGGAGA  
AGCGCAACTGGGTGGATGGGTACCGCGTGAAGGTCGTTCGGATGGTTACGAACGAC  
GTATTCCCCTACATCGGCGCGCGGCCGGCGGCGGAACCTGGAAGCGCCCGAATTCT  
GGCAGTGGCCAGACGCATCGAGAAGCGCGGCGCCTTCGAGTCGGCGCATCGGATCA  
TGCAGAACTGCGGCCAAGTCATGCGCTACGCCATCGCCACTGGGCGCGCCAGCCGC  
AACCCGGTAGCCGACCTACGCGGCGCGCTGAAGCCGACGCCCCGAGCGTCACCTGCC  
GGCAGTGACAGATCCGGATGAGCTGGGACCGCTCCTGCGCGCCATGGATGGCTACA  
AGGGCAGCCACGTCACGCGCTGCGCCCTCGTGCTGGCGCCGCTCCTCTTCGTACGTC  
CTGGCGAGCTACGGCAAGCCGAGTGGTCGGAATTCGATATCGAGGCCGCGCGGTGG  
AACATCCCCGCAGAGAAGATGAAGATGCGCCAGCCCCACGTGGTACCGCTTTCGCG  
ACAGGTGCTAGCTGTCTGGCGGACTTGCAGCGGCTCACCTGCGCCGGCCGCTACCT  
CTTCCCCAGCACCAGGACGAAGCTGCGGCCGATGTCAGACAACGCGGTGAACGCAG  
CTCTGCGCCGCATGGGCTACGAGGTAGGCACGGTGACCGGCCACGGCTTCCGCGCC  
ACGGCCCCGCACGATCCTCGACGAGGTTCTGGGATTTTCGGCCGGACATCATTGAGCAC  
CAGCTGGCGCATGCAGTGAAGGATCCCAACGGCCGGGCTTACAACCGCACGACCCA  
CCTCGCCGAGCGCGTGCGCATGATGCAGCGCTGGGCTGACTACTTGGACGAGCTGC  
GTAGCGCACGATGACATTGACCGCCTCAGAAATTGATTCGGAGGCGTGCGACTGAC  
TCGCAGGCGTGGCAAGATCATTGCAAACCTCACGGGCGATTTCCGACTTTTTTGCTGA  
ATCTGGGGAGCATGGATGGCAGGTACGCCGAGATGGACTTACATGCTGCGCATTCC  
GGGCGCTAGCCCCGGCTACGTTGCCAATGGATAAGCTGGCCGACTACCTCAAGGAGT  
TCGCCGAGCTGTTGGGCTTGGAACACAGGCCTGTGTTTCGTGGGCATCAAGAACGCC  
AGCATCGGCTTGAAAGGCAAGGTGCCGCCCCGGCGGCGGGATCAAGCGTGGAACG  
TGTCAGGAAGCCAAGTACCGGCCTGCCAGCCGGCCAGGGCGCCACCTGAAAGCCA  
TCGAAACCCTGCTGGGCCGCGATGGCTTCCGCGAAGCCGAACTCAAGGATAATGAA  
GGTAAGGTGCTGTGCCTGTTCCGCTCGGAGGAGCAGATTCTATGCAAACCATGACT  
GTCAGAAAGCACGGCGCCGTTGACGGCATTGTGACCGGCCTCAAAGGGGCCGATGA  
CACCATGCACCTCTACCTGCGTGACCAGATGAGCCGTGACCACAACCTCGTAGTGCG

TGATGAAGCGCTCGCGCGGAGCTCTTGCGGCATTTCCGCGCTGGCATGGTAAGGGT  
GCGCGTCTATGGCAGTTGGCAGCGCACCGAAGATGGCTGGGTGCCAGAGAGCGGCA  
GGTGCGTGGTGGACAGCTACGACCAGCTCGATGAAACGCCGCTTGTGGAGGTGATG  
GCAAGCCTTGCCCATATTGCCGGCAATCGGTGGGCCGAGATGGATGACCCCATGGC  
GGTGTGGCGCGAGTTGCGGGGGATCCATTGAGCATGAACGAGCTGCCCCGCTTAGT  
TGCCTTCGACTGCAATGCGCTGATCTGCCTGACTGGCGCTGATTGCGACGACAAGAC  
CAGGCTAGTGCACCTCTTCGAATCGATCGACAAGCGCAAGGGGCAGGCGATCATTC  
CCACGCCACGCTAGCGGAGTATCTGATTGGTGC GGATCGGGCAGGGCTTGATTTTCG  
TTCAAGCATTCGAAAAGCGTTCAGCAATCAGGGTTCGCGGACTTCGACATCGCGGCTG  
CGTTCGAGGCGGCGCAGATGCACGCGGCGGCAATCGGGCGTGGCGACAAGCGGGA  
CGGAGCTTCCGAGGGGTGGCAGAAGGTGAAGTACGACACGCAAATCGTGGCGATCG  
CCAAGGCCAACGGTGCCCGCCTCTTGATCTCCAATGATGCCGGCGTCCGCGCCTGCG  
CCGCGCGCATCAACCTCAAGGTAATGAGGGCCGATGAGCTACCGTTCCCCGATGCT  
GCCAGACAGCACGCACTTCATATGGAAGGTGGCGAAGCAGCTGCGGGCGCTTGATA  
GCGTTTACGCGCGAACTCGGCCCGCCACCTCGAAGGCCTGAGCGATCGGCAGAGTTA  
CCGCCGGTGGTATCACTGGGCTTCCCGCGATCGTCAGCGACACATCGGCCTCACTCG  
CCCCATTACGCCGAACCCTTGCCAGGACCTCTGAGCCAGCTGGGTTGGCACGCAGTA  
AAAGCCATTGGTCCCGATCGGTGTCATTTCCGACCACGGGGTTGTGCCAGTTCATCC  
CGATAGGCAGTTCCGGCAGCGTCACTCCTTCGGGAGCAATGACGCTGGGCTCTTTGG  
ATCGCCGCAGAGCGGCACGGTGGGCAGATCGGGATGGCATACCACATGCTACCGC  
CGGCCATCGCACAGGCTGAGATTGGGTGCCGGCCTGGCGCTGCTCAGGCGCCTCGC  
GGGTTGAGCGGCCATACTTGGCACCGCGACCGGCAGATGTAGATTGGCAGCGATAT  
GGGATTCCGCATATCGGCCTGTTCCGCACGGTGGCGTCAGAATTGCCTGACCGCACT  
CAGGCAGGAAGTTCGACCCTCATCCAATGGGTGACGCCCTCGATCTCGTGATCTCG  
TCCCAATAGAAGCGCGCGCACCTGTGGACCGCCTCGCTCCACTGACGATAGCCATCG  
AACGTGAGGACTGTCTCTCCCTCAGCAGGCATCTCACAACCAGGTTCAATCTTGCTC  
CACTCCATGGCCGTCTCCGTGATCAGCGGGCCAAGGCATTTTATCGAATCGATAGGG  
CGCGATGCCTGTACCGCATCAGATTCCCCATGAGCAGACGCCGTGTGCAGGCATAG  
CTCAAATGAACGTTTTTTTTGCATGGGCGGGCCATGCATCTTGGCCTTGCGCCGAGAT  
GACCTCGCGCCGCGGCAGTGACCGGCGCAGCACATTCGGAGAACGTAATGCACGC  
ACTGTTGATCACCGCCGCAGTGGCGCTTCTTGCGCTCGCCATCCCAGCCGCCGCCGG  
CGAAACCAGCCAGTTCAGCCGCACCACCCAGCTGTATCAGGAAACGTCCACCGCCG  
GCGAGACGCTGGATGCCTTCGTACCCGCATCGCACCGCGCGCACGCGCCGCATCA  
GTCAACGCCCCGCGCCGTGGCCTGTGGCGAGATCCAGGGCAGCGGCCCTACACCCT  
GTCGCTAAAGACCGATGGGCGACAGGACTGGTGCAGAGGTGCCGAAGACGCCCGCGC  
CCTACGTGCTCGTCAACGGCATCGCGAAGGACGCGCGCGAGGACCACATCCCTTCC  
ATCTATTACCGCCGACCCGGCTACCTGATCACGCCGTGGTCCATCAAGTTCCAAGAC  
CGTGCCGGCGTGCGCAAGGTCAGCGCCGTTCGGTCGCTGAGACGGCGATGCAGCTTG  
GTCAGGCTGCCGCTTGTTGGGCAGTGGCCAGACTGGCGGCGATTGCGCTGTCCGTTG  
CAGCCTTGATAAGCGCCTGTAGCTTCCAACCAGCTAGATCCAGTGTTGCATCTGCTC

CGGGATAGCGGATGGTGTAGGTCGGCGCGATCAGGTCGGCGATGGGCGCAGCCAGC  
ACGCCGAGGGCGGCGCCGCGGTCTCGACCTGGAACGTGACGGTACCGGTGTCGTT  
GATCGGGTTCCAGATGATAGTGATCTGCTGCGCGAGCGGATCCGCATCCGGGTCCGG  
CGTACCACGTTTGCATCGTAGGCGGCGCGGGTAGCCGCCTTGATGCCCAGCAGCA  
GATGCACGCCAGGCTCGGTGACCGTCTCGCCCGGCACCTCCACGGATCTGCCGGTCG  
CCGGATCGACATCAGTCGTTGCCGGCGCGGTGATCTCGTAGCTGCGGCCAATCAGGT  
CGCTGATCTGCAACGTGAGTACGCGCAGGAAGAATCGCTCCAGCGTCTGGGTCCAG  
CCGTGCGGGTGCGGCTTGTTGGTGGTCATCTGCTCGAGGTGGAACCTGACCCGACCATCA  
TTGGTGGCCGGGTCCCATCTGATCTCGATGCGCGGCGACACGATCCTGGTCTGCGTG  
CCGAAGGTAGGGTTTTTCGCTGATGAGCATGTCAGTAGCCTGTAACGTCGAGGATAG  
GAGAGCGCACCCAGGCCTGGCCGTACTGGCCAGGAGCAGGAAATGGGGTTCCATTC  
GCGCCCGTTTGAGAGAAGCTACCTGTGTGCGATTGCACTGATGCTGGCAACGTTGCCG  
TTGATGTTGACGACTCCCTTGCGCCACACCACGCTGACCAGCCATTGCGGCCCGCCG  
CCAACGACACCACCGGCGGCCAGCATGATGTTGCCTGCCGATCCAGCAAGCGCCGC  
GTATGTGCGGCCTGCAGGAAGGGTGATCGACCCACCTTGGTTAGCATTGCCCTGCAG  
CAGCCCACGCACCTTCATGTATTTGAGAGTCGCATCGAAGACAATCTGATTTGTTGC  
AGGGTTTTCGTATCACCAGATAGTCGCGCCGACCGAACGTCGGCTCGTCGAAGACAT  
AGGCTGTAAAGCTTCCGCCAGTCGTAAAGCCCGTGAAGGTGAAGTTGCTACCGCTCT  
GCGTCCGCTGCATCAATGCAGCGTTGTTCTCGCCTAGAAAAGCGAGCACAGGGTTTCG  
TGCCGCCGATCGTCAGACTCCATGTCTTTAAAACACCCGAGCCGGTAGGGCTGATTG  
TCTGCTTCGATGCCAGCGCCAGATTCTTCCAATCTTCGGAAATCACAACACGATTGG  
GGCCTGCGTTGATCCGGGCGAACGCCATCAGAACCTCCCGTAGTACAAGGTGCCGC  
CGGCGCGTGCGGTATTGGCCGAGTCAGGCGAGCTCCAACCTGATCGCATTGCCGTTGT  
CGCTCAAGATCGGTAGCAGCGCGTTCCCCGCGCTGCTATCTGCCACAAACCAGTAAT  
ACAGCTGGTTGGCGCTGCCGGTGACAGGCACCGCCACCGAGCCATTGCTGCCGCTG  
GCGATACCGATCGCACCCATATGCTGCGTGAGCAGGTCGGAGTCGGCTTGGTCGGTG  
ACCTGCAACAGCACGACATTGGTGGCCGCATCGGTGATTCGCAAAAACGTCGTCAT  
ACACCCGCCCCGATGGCCACCACCTGCACGCCGTTGGGCGCATAGCAATAGATCTTG  
CCGTTGACGATCTCACTACGGCCCTGCCCGGCATCCACGCCGATGAACCGCACTTTG  
TCGAAGGCGAAATCCAATGTTGCCGTCTGCCATTGTTGACCGAGCGAGCACCCGCA  
ACACGACCATTACGTCCAACGCCAGCGTCCAAGATGCCTGGTAACTCGCTACGCCG  
TTGTCGTTGACCGTCATCCGCGCTTCGAGCGATTGCGTTGCCGAAGCCTGATCCACC  
ACGGACGTGTCATCGGTCCACATCGTGCGGACACAGACCCGGCTCCAGCTTGGCGCG  
CCGGAATAGGTACTCCCCGGGCTGTTTTCTGCGATGAAGCGGCAGGCAAGTCGTGT  
GGTACCAGCCGGCGCGTTGATGCTGATCTGAAACCTCTTCCACGCCGCCAGCTGCC  
CGAGTCCGCCGAGACCGTAACGGAGCCGATCAACCCTGACGCGCTATGCGCTGCAA  
TCTCGATCCGCCAACGCCAGAGCCACTGTCTTTCCAGATTTCAGAAGAAAGCGTGT  
AGATCCCTTGGGAGGCGTTCACCGATTGCTCGGCAGCGG

>CONTIG\_69\_length\_6333\_cov\_25.735740

GTCTATACCGGCAAGCGCGACACGACGTCACGCCTGAAGGTGCTGCTGGAGCAGGA  
AGGCTTCAAGGTGGCGGTGCTGCGCGCGAGCGTAGATGCCAGCCGCCGTGAAGACT  
GGATCGCCGAGCAGTTGGACCGCGGCATCGATGTGCTCATCACCACCCCGAACTC  
GTCAAGACGGGATTGGACCTGTTGGACTTCCCGACGATCGTGTTTCATGCAGTCGGGC  
TACAACGTGTACTCGCTCCAGCAAGCGGCACGCCGCTCCTGGCGCATCGGGCAGAA  
AGAACCCGTGCGAGTGATCTATCTCGGCTACGCCGGCTCCTCGCAGATGACCTGCTT  
GGAGTTAATGGCCAAGAAGATCATGGTATCGCAGTCCACCTCGGGCGACGTGCCCCG  
AATCGGGGCTGGATGTCCTGAACCAGGATGGTGATTCCGTCGAGGTCGCATTGGCCCC  
GGCAACTGGTAACTGCGTGATCTACTGTCTGCCGGCATCCTCTCGGGGGTGTTCGGCA  
TTTTCTTAGGAAATAGCTGCTCGGAAGATTCGATCACCGTCCCGCTCCCAGCGCTGG  
GCAAATAATTGGTTGCTGCGGCAGGAGCGATACAGCGCTATCACCAGAGCATGG  
GAAAGGAGCGTCTGCGCACCGAGTTCGGCGGCAAGTTCCTCCGGTCGGCCACTTC  
GGCCCGTGCCCTCCGGCCTGCCGATCGCGATGCTTGAAGTAGCTCCGGCCCCAATGG  
TCAAGGGTGCTGGATTCTTCACCGCAACCCTTCCAACTTACTTGAGGCAGTGCTTA  
GCGAGCGCTTTCTTTGCATCAGCGGTCTATGGTGTATCGATAACCTAGACTCGATAA  
ATAACGCCGCCAGACTCTCGAGCGAACGTTTCACGGCCAATCGTCGCAGCTGCAAA  
GTTGTAGCTCGACTGTGCCGTTGCTCGACATGCGCCGACACAGCAACGGCACTCCAG  
TTCCTTGGGCCACACTCAAATGCCAGCGGCGCGCATTCGCGCCTCCAGCTCATCAAG  
GAATGGCGAGCGCCCAAGGCGCATGGGGCCATAGCGGCCATCAACGAAGCCCGAAT  
ACAGCATGTGGACCTCGTCGCGAGCACGTGTGAGTCCCACATAGAACAGCCGGCGG  
CTTTCCCGCAACTTCTCTGGACTCTCGTTGCGCCACGGTAGATTTCGAGGTCGAGC  
CCAACCATGATGACGACGTCGTA CTACAGCCCTTGGCGGAATGCAGTGTGAGCAG  
ATTCAGGTGATCGGGCGAACCGTCCCGACCGCCCAAACCTCGTGATGTCTAGCGAAG  
CAAGTGCACCGCCTTCGGCGAGCGCTGCCGTCATACGATCCAGTTGCTCCTCCTGAT  
CAGCGAGCGCCAATTCAACCGCCAGCAGATGATCCACTACACCGTCGCGCAACGAA  
GCAACAAATTCTCGCGCAGGTTGCTGGTCAGCGCGCAGTTCCCATAGCAAAGCGGTT  
AGCGCTTGCTCTTCGCGCCTAGCCTGTGCATCGTCCAAGCTCGCCCGATGAAATGCG  
CGATAGCGGTGAGTAGTCCACGCAATTGTGGGCGTCCGACACGCCAGCCACCCCC  
GCACCACGCCGCACAATCTTCGACCCAACTTGTTAGGGCAACCTTGCGGTAAGGTGC  
TGCGGTATCCACACGGATGTAGTCGAGACCGCCAGTTGCCACAGCTTCAGCCACGAT  
ATCGCCTGCGCGATAATCTTTGTATAGGATCGCGATATCGCCCAGCGTTCGTCCCGG  
CTTGAGGCTAAGGCCGCCGGAATGATCTGCGCGACGGCGTGCGCAGCCTGATCTG  
CCATACCACCCGGGCGCAGTAAGAATTCGATGGTCGTTTGTGCGCGAGGATCGCTCG  
CTTGATAGCCTCGGGCTTCTCCAAGCGCCATCTCTGACGCAGTTACTATCCCTGCGC  
CAGAACGGTAATTCAATTGAAGCTGGACGGGCTCAATGTCGCTGCGAGCCGCCAAT  
TCTATGAGCAACGCGCCATCAGCCCCCGTAAATCCATATATCGACTGATCCGCATCA  
CCGACCGCGAAAAGCCGGACCCACCGTCGAAGGCAAGGCGTTTGACGATGCGATG  
AAGCGCCACGCCTAGATCCTGATACTCATCCACCACGAGCACGGGAAATTTGCCTG  
GACCAGAGGTAGTACCCAGTCGTTATCGGCGATCAAGCGCTGACCGAAGACCACCA  
TGTCATCGTAGTCAATTAGGCCCTCGTCGCGAAGACCGGCCTCGTAAGCCTCGGCCC

AAGCAGCGAGTTCTCTCTCGCTACGCCACGCGACGCTATTTTCGATTGAGCACGGAGC  
GGCGATGCCGCCCCGAGGTCAATGACCTTGTACGGGTGGTTCTGGCCAAAAAGCGCG  
TCTCCAGTTTGCTTCAACAACCGATCGCTGACTCGTTGAGTGGCCACCGAAAGAGGG  
AACGGTATCGGCAAACCGGCCAAGCGTCCATACGGCATCAACAGATGGCGCAAACA  
GAACCCATGGACGGTACCAATGAAGAGATTGGGTGCTTGTCGAAGTCCCAGGGCTT  
CAATCCGGCGAGTGAGCTCGCGTGCGCATTCTTGGCTATACGTGATGCATGCTGCGC  
CACGAGGGGTCTCGACGTCTTCCGCCAGGATGCGGGCGAGTTTCAGCACGAGCGTC  
TTGGTCTTGCCGCTTCCAGGACCGGCGAGCACCACACAATGTCCCCGAGAATTGTAA  
GCCGCCAACTGACCCGGATTCCCAGCCAGTTCGACGGCTTGAGCCAAGTAGGCTGT  
GCTGACGCTACGCGATGGCATCACGGATATGCTCCAGAGCGGAACGAATGTAAGCC  
GGACAGACGTCCTCTGACACCGACGGCGCAAGTGCCCTGCGCAAACCTCCCCCTTTCCG  
ATCCTCTCGATTAATCTGAGCAGCAAGTCTTCATCAATTTGAGCAGGATCGTCCACC  
CATTGCTGCAATGCATTCAGAGTTTCTCTCCTCAATCGAGGAAGCTCCTCCCGGATT  
ACCTCCTGCATGTCCTCCGCCAGTCCACCTGCAAATAGTTCGGGCTCTAACGTGTTCT  
CGTTGACGAAGTATCCGTACTGCTCGGCAAGCTCGATCACTTCGTCCGCATCCAATT  
CCTCGTGATCGACACCGCCCTCAATCACGTCAAGGACATTGATAAGCCGCCTGCGGA  
CCAATGGATGATTACCGTTGGTCGGATCACGGTCTGTCAGGATCACATGGGGGATGT  
TGAGTCCTTCGGGGGCCAGTAACTTCACATACGGGGTGAAGTTGGTCCCCCCCCACCG  
AGCACACAGTGATTCCAAGCATATCGAGGGGAATATTGAGTACCTCGGCAAACGCG  
GGAACGATGAAGCGCTCGGCGTCGCCTTCGACCAGAATCACCCCCCGAGAAAAGAA  
AATCTCGCCGCGAGTGACGTCAATGTAACGTTGGAGATCCTCTTCATCCCTCTGCGT  
GAAAGGTGCGTTTGCTGTCGATACCGCGACAGTCTTGCCCTTCGCTGCGTCATGGCG  
TAGCAGGACAATAGATCTGATCGGCGCAACGCTTGCGATATGTGGCGAGTGGGTAG  
TGAGGATTGTCGTTAGCGGTGGCTGTTTCATCACCATCTTCCGCCCCCGTGCCAAGGA  
AGTAACGATAGATTAGACGCTGCACGTGCGGGTGCAGGTGCGCTTCGGGCTCCTCG  
ACTACGAAGAAGGTGTGGTCGCGCTCTCCATCGGAAACGAGGCGGTTCGAGTTCGAG  
ACTCTTCAGCGCCAGGAAGATCAGGTTTCGCGGTTCCCAAGCTCGCATCGCCGACTCC  
GCGTACGCCGTTGTCGATCAGCAGCCGCAGGCTGCGCAGCAATGCGTCGACTCGAG  
TTGGCGCAAGTCCGAGCGACATCGGAACGGCATGTTGCTCCCCAGCGATGGCGATT  
AGCCGTTTCGCTAATCCGTTCTGCTGTCGCTACCACTTCCTCGTGACCAGCCAGCTCTC  
GCTGTGCTTGGTCGACCTGATTCTGAATCTCCTCACGGGTGTCATCATTCAACGACG  
CGGCAAGATCCTCAATGAGCGGTCTCAATGGCGAATTGCGCCAACTCGCAAGGTCC  
TTTTCAGCGTCACGCAGTGCTACTTGAACATCTATTGGCAACATCCGGCGAAGTGCG  
CCGCCAATACGCATATCGGGATCGTCGCCACCGAAGATCACATACTCATAGTCCTTC  
AACGATTCCGGGGCATGCCCCAGGCCCGTCTTAGGCTGGAAGCGGTAGGTGAGTCG  
GGCCACCATGGGTGGGCCAGGATCAATCACGCAATCGTTGAGGTGGGCCATCAACC  
GCGGATCGTCCGTAAAGTCCGTTAGATCAACTGACACTTCACAGTCTCGCCAACCT  
TGTCTTCACCCAACCCATCCCAGAAGTGCTCAAGTCCCAACTGTCTGTGCGGTTTCGG  
ACAAACCAGGATCAAGGATCAACTGCAGGCCGCGAATGAAATTGCTCTTGCCGACC  
TTGTTTTTCGCCAACGATGACAATGCTCTCACCTGTCTCGATATCAATATCCGAGAAA

TTGGCGAAATTGATCAACCTGATCCTAGAAATTCTCATTTACGTCCCCGTCCGGTGG  
TATTTTAACAAATAGTAGCAGTCAAGCGGCGGGCCTCCATCCGCCGACCGCGACCG  
AGATTTTCCGTTACGCCCCCTTGAGGCCGATTTTGTTCGACTAGACCGCTGCGGTAA  
ATCGGACGCAGTGTGGTTCGCATTGTTTGCTGCTGCCCCCGGCCTTAGCGGCGATGG  
TGAGGGCTCGATGTTTTAGGACGCCGAGCTTATGTGCCCCTCTCCATCTTGGTTTCAC  
CATCCCGACCGCCGCCTGCTGGCGGGAGCCCTCGGCCTGCTCTGGTTCGGTGCTGGCT  
GGCGGCTGCGCGACGACGACTGCGCCGCCGCGCCTGACTCCATTGAGGAAGTCTC  
GGCCACGCCCGAACCCGAGACGCCCGAGTACATCCCGTTGTACGCTACGGTCGCT  
ACACGCTGGTAGAGCTAGCACCCACGGCGGCGCAGCGGGACCTGCTGTTGCAGACC  
ATCGACGTGTCCATGCCCCAAGATGCACGCGCCACCGTCGGCGATGGGCTGCGACA  
TGTGCTCAAGCGCAGCGGTTACGGACTGTGCCAGACGGCGCACGTGGTGAGCGAGC  
TGTACGCGCTGCCGCTGCCAGCGGCGCACCTGCACCTCGGCCCCATGACCTTGCGCG  
ATGCGCTGCTCACACTGGCTGGCCCCGGTCTGGAACTGCACGCGGATGATCGCGCA  
CGGCAGATTTGCTTCGAGCGGCCCGGCGACAGCGTGGCCGGCGAACCCGCATCCGA  
ACCATCCGCTGCCAAAGCGGTACAGGCATTCCCGCTGGAGCCTTCGGTTTCGGGAGA  
CCAGCCATGAACACCCCGCAGTCTGCCCGCCACCCGGCCGCCGCCGCTGGTGGTGCA  
GAGCCTTCTATGGCTCTGGCTGATCGGCCTCAGCGTCTTCGTGGCCTTGGGCTACCA  
GACCATGAACGACCAAGCCGACCAAGAACGGCTCGATTCCCGCCTGCAACGCGTGG  
AAGCCCGGGCGGCGGCCCTGGTCGAGTCGATCAAGGCCATCCAGCAGCGTCCGGCC  
GTCGCAACGGCGGCAGACCTCAAAGACACCCGCCAAGTACTGGAAGCACGCACCGC  
CCAAGTTGAGACAACGCTGAGCGGCTATGCCGCTGCCGACGACCTTCAGGCGCTGC  
GCGCGGAGGTCGAGCAGATCAAGGCGCGCCAGACCGCTGCGCCTGTTCCGCGCGCC  
GCAGCACCCGCCAGCCGCGCGCATCGGGCAAGGCCGCCGCCAAGCCCGAACCGCC  
GCCGCTTCCGTTCCGCGTCGTCGGTGCCGAATTGCGCGCTGGCCAGCGCAGCGTGTC  
CGTCGCGCCGAGCAGCGCGGACTTCACGCCCAGTCAACTTCAGGTGCTGCTTCCAGG  
TGATGCGGTCGGCCCCGTGGCGCTTGCAGGCGGTCGAGGGCAACACCGCCGTGTTCC  
AGGCCGGCGACCAGACCCGTCGCGTGGCGATTCCCTGACCGGAGCACACTACATGA  
AGCCGTCGATCATCCTTCTCGCGCTCCTACTGGCATCCGCCAGTTGCCCGCCTGGG  
CGCAGCAGCCGGCCACCGCCCCGACCCGCAATGCGCAGAGCCAGGAGCGTCCGCTG  
GTCGCTCGAACCCCGGACGACAAGGTAGCAAGCGACTGGGGCCTGCAACCGCAAGA  
ATGGACGCGCTATCGCGAGTTGATGGACGGGCCGCTAGGCATCTACTCGCCCAATTT  
GGACCCGCTGTCCGCCCTGGGTATCGAGGCCCGCACCGACGAGGAACGGCGGCGCT  
A

>CONTIG\_70\_length\_6251\_cov\_14.456891

GCCTAGTGGCTATGCAGGCACAACACCGGGGGATAACCCACTGGTAGGCATGTTGT  
AGCGCAACCCCGGGACTGCTGCAACTTTGTGGCATAACAAGCTTGGGAGCAGTTGGT  
GACCAGGCTCAGTGCGTCTTCCTACCTTCTTCAGCGCTGGTGATAGCCATCCGCAAC  
GCCCCAAGCGAAGTGGCGTGGTTTCGAGTTGCGTGATCATTTTCGGTTTTCCACATGG  
GCCAGCAACGCGCCTAACAACCTCGTTGTCCTCTAGCGCTTCTGCCCCTGCAAGGAAA

ACAATCTCTGCCACCCGCGTGCGCCGCTTGCGTTCTTCGCGTCGTTGCGTTTCCTTCG  
TTTTACGGCCTGACGTTGGTTGGCTAAAAGTTCTTTTCGCTTGAAGCTGCGCCAGTCG  
TTCGGTGGCTCGGTGGATTTCGGTCGTGGTAGTGGTTTGTGCGCTCATCTGATTTCTC  
CTCTGACTGTTTACGAGTCAATCAAAAAAATGGCTTGCGTCAAGTTTGCGACGATTC  
CGATTTTGACCTGCCATCGAAATCAAAAAAATCTGAAAAACAAGGCTTAAAAGAAA  
GAAGCAAGAGCGCACTGATGCAATGTCTGCGACATAGCGCGCGCCAGGTGCTACGC  
CCCCGGACCCCAAGCGCTCCGCGCTTGCGCAAATCAAAGCCACGGCATAAAGAG  
AGCAACCTCATCCGGAGCTCTCCATGGCCATCTACCACTCTCGCGTCAAAACCTTTA  
GCCGTTCCCGTGCGACTCCGCTATCGCCGCTGCCGCCTATCGCGGTGGGCTGCTTC  
TCATCGATCACATCACCGGCCAGCGCCACGACTACCGCCGCCGCGGTGGAGTGGTC  
GCGTCCGAGTGTCTGGCCCCGAGGATGCCCCGGCATGGGCCCTTGTCCCCCGAGAG  
CTCTGGCCGAAAGCCGAGGCCGCGGAGAATCGCAAAAATTCAGTGGTAGCCCGTGA  
GTTCGAGGTGGCCTTGCCCCACGAGCTCAACGACGAGCAGCGGTCCGACCTCGCCA  
TTGCCATCGGACAGACCCTTGTCGCCCCGATACGGCTTTGCCCTGCAAATGAGCATCC  
ACTCGCCGGGCTCCCGCGACGGTTTGAATCATCACGTCCACCTGCTGGCCACCACGC  
GGCGGTTGACCAGCGACGGCTTTGCCGAGAAGACGCGGGAGTTGGATGGCGGTGCG  
TCGGGGAAGATTGAGATCGAGTGGGTCCGCCAAACCATGGCTTCGACCATCAACGC  
GCATTTGGCAGCCGCGGGAATCGATGCCCCGGTCGACCATCGCCGCCTGGAGGTCC  
AAGCCGAGGAAGCTCTGGCTCGCGGTGACTGGGCTGAAGCGATGGTGTGTCTCGTC  
AGCCACCAAGCACATGGGCAAAGCGGCCTCCGCCCTCGAACGCCGGGGCTTGCTT  
ACAGAGCTGGGCGCCGAGAACGCGCGCATCGTTTCGAGAAAACGAAGAGGCCTTCGA  
ACGGTTGCTCGCGCAAGCCGAGCAGGAGGGCAGGGCAATTCCAAATTCTATTGGCC  
ATAGCCACGACCAAGCGCAGCGTGACCGTCGACGCCGGGCTGGCTCCAGAAACGAT  
CTCCCGACTTCTTTGCCTGGATTGGAAATCCACGGGCTTCGAGGCATGCGCCTGTCC  
GAAGCACTTGGTTGGTCTGCAGAAGAGAGGGAACCTCGACCAATGCGCTCCATCGG  
TGAGTTGGTCATGGAAGCGGCTCGTGACCTGGCAGAGATCCTCTCGACTCGGTCCGA  
CCTGATGCTGGTGGCAACTCAGCGACTGTTGCGGACGGCGCAAACGGCGACGTTTGT  
CGACAACGTCGACCTTCGCCGAGGGCTTGATGGGTTGGTCGAACGACTGGGCCGCC  
TCAAGCGCAGCGTGGTGAAGTTCGCCCAACGAACCAGCGCCTTGGGGCGTGCCGAG  
AAGCTCTTCCACCTAGCTGAGCAGGCATGGGAGCAGTTCAACGGCGACCATCCTCG  
GCCCCGATGGCGAGTGGTCCTCTCAAGAATGGGAAAAGCGACGAGGAAGGCGGTTGG  
CCGTGCTGGAAAAGCGAACAGCCGAACCTGGCGACAGCCCGGGCAGCGGTCTCCGAG  
CAGCGGTGGAACGACGACGAGAACGAGATTGAGATCCGCGCGGCTCAAGTGGAAC  
AGTGAGCGAAGCGATGCTCGCACGTCCAGAGCCTGAAATCGTCCATGGCTCTGTTG  
CATCTATCGACGCTACTCCAGCCATGCCCAAGCCTTCGCCGATGCCAGTGCCAGCGC  
CAGCGCCGCAACCAACACGCCGCCGGCCGCGCCCCTGATAGACACTTGAAGCTCCA  
CACTATGCGCCGTAAGGCGTAGAAGTGATGCTATGACTAACTAAGCCTATGGCGG  
CCGAAGCTGCGCCGAAGTTCAACCCACCTTTGAATGCATACTGTTTCCATATGATTC  
ATTGGCTCAATGTACGGATGAGGCTACTTCTAGCCAAACGCCGACGGTCTGGGGAT  
GATCGAAGCTTGGTGAGAAGAATTGTGTTAGTTGGTTGACCATGGAATGTTCCACGT

CAAGGCAGGCCAAGGCAATGTCGAGTCATGATCTGCGACCTCACCTGGACGTATGC  
TGTTTGCGTCGGCGAGTGCCTCAGAGTGAAGCGAACCGCTTCGCGAAACGTTTCGTG  
CAGTTAAGCTGCGCGGAAATTTGATGATCTCACCGCACTGCGTGACTAGAAGATTGC  
GATTCCGACTCTGGCCGCAGAGCGCCATCCGACCATTTCGAGCCTTCCCTAGCAATC  
GGCCATGTCGACCCCTCGATTCCCTGCAGAAGGGAGTCTGCAAACCTTGGTAATCTCCT  
AGTTCTGGGTTCTAGGCTCACGACTTCGTCCATAAACAAGACGTGTGCGTGAGAGTG  
CCAATTTATTGGAAAGTCAAGCCGAAAGTCATCCCCATAGCGAAACGCTTACTGTAA  
ACTGACATGTCTATCTATCAAGAACTTGCGATACCCCCTGAACTAGAGATTTTGATG  
GCTCAGGAACCTCGCCGTCGCCTTGCTGCCAAGTATGTAGGGTTTTGTTTTGAAGCA  
TTCGAAGTTCAGTGGTCGGGCACCAGTCACGAGCCGCGCGCCTTATCTTCTGTCTCT  
GGCATTCACTGTCTGATCTCTGGCGAGCCGGAGCAGCGTCGGGGCTTACATTGAAAAG  
CGAATAGCCGTTCTTTGCGCACGAGCTTATGCAGCTATGCTCGTCTTGACACGCAGG  
GTAAATGCCGAAGGGCAGTCCCCCTCGGGTAATGAGTTCTGGCAAATCCTCCAGGAT  
AACGGAGACCGTTTCCGTGTGGCAGAGCTGTGCGCAGCCTATTTGATAGAGAGCAA  
AGACAGTCCAGAATCGAAAAATCTGGAAGAGGAATTTTTCGAAAGACAGAACCAAT  
ATATCCTCCGATTTCGGCGTGGATACTCTCGCAAAATTGCTCACGGAGAAGGAATTC  
TTTCCTTCGTTGAACAATCGCTGAGAAAATTTAAGCGTTCTAATGCATTGTTTCAGAC  
AATGATCGACGCTGAACTTTTGAGAGCGCTACGAGCCGGGTGTTTCTACGCTGGAGAT  
CAGAGAGAGGGCGCGCCTGTCTGAGCAGCCAAGCTACCTCTCAACGGACTTTAATT  
GTCTGATACAGTCACGTTCCGAGGAAGATGATGACGTGTCTCGACGATGCCTCGTGG  
CCCATGAGCTCGGGCACTGGCTGGCCGCTCGGTATGTCGAAATTCCTACATCGGGAG  
TTGAGTTAAATTTGGCAGAGTGTGTTGGGTTTTGCACCGTTTTTCGTAGGTCTTCCTGC  
ATTTAATTGGTCGCTTGAGTGCTACTTGAGCGCCCGTATAGCGGTGCTGTGTGCTGG  
TTCCTACGCTGACTGCTGGTTGCGCCATCCAGACAAACGCTATGCCATTGGTGGCGT  
GTTTTATAGCACTTTGTGCCGTAAGACTGGCATGGGCGATTTTCGCCAAGCTAATGGA  
GTTGTATCTGTTGTATAGAACAATAGCGCGGTTCGGTTAATGTGCGGCGAGATTTGGC  
TTCTCCACCATGTGGTAATGAAATCCTTTCCGTGCTGACATTGTTACTACGGGAATTT  
AAGTTGTATGAGTCTCTGAGATCGCCGGGGTTCGAAAATTTTTCGAAACAGATATTC  
TGTGAAGCGAAGCTGTCAGGAATGATTTCTTCAAATGCGCCATCGCAATTTATTGAG  
TTTAAACAGCGAGGCTTGATGCTTCCTGCGCCGAACATGGTATCTCAAGAAATGGC  
GAGTGAATTACGAACTTAAGTCGCCTTCGATGCAATTCGCGCCGACACGGAAGTAA  
GGCAGATTGGGGTCTGTAGGTATTGACGGACGATTAATGAGTGATCTCCTTGCCGTA  
AGCGGGCACGTTCTTTCTGCCGCGCGTTGCACAAGCCTACGATTCGAAGCTTTTCTA  
AGCTGCCGGTCCAAAAATGTGGAGCTCCGTAACACGGGGCGCTCCCCCTTGATTCTG  
GTAGTCCGTCTGACGTGTTCTTTGAGCACTTATGGATTATGGACATCAAAGCCAG  
CAAATGCTGGGCTTTCTTCTTAGGTCTTAACGCCGGGGGCGAGGGCGCAAATCTATG  
TGCTCGACTCCAATGGACTCCTTGGGACGGGGGACGTTGTCCTTGTTCTTCTTCTG  
GTGCCTCTCGCCATTCCTCAATTGAAGCAGGCATGGTCGGCACGGCGCTGCGATCGA  
CGGCCGCTCGTTTAACGAGGATAGGTTGAGAAGGTGCCATGGCTGAGGCCTGGGTTT  
GACTGGCTGGCCCTGGCCCGCCGAGCCTCAGCAGCTCGGCGGCCAAGTCGAGCGCG

TATTGGATGTCCTCCACTTCTTGAGGGGGAAGGCGCGTAGTGCGTTGCTGAAGGAGG  
TGGCCGAGCAAGCGACTGGCGATCTGAATCTGCGTTTGGTGATGCATGGGTGCTCCT  
GTGTTGGGTGAGCACACATAAAATCAGTTGGCTCTTTTCAAGCAAGAGCTCGCTTGG  
CGCGGCACTTCACAAATTTGATGGCTGTCTGCGCCGTAATTTTCATAGGAGGTATTAG  
CCTTCGATCGTCACATATTAGGCAAATCGCTTGGTTACGTGATTCAGGAGCGACAGG  
AGTCTCCGGGGTGCTCGTCTGATTAAGGCCACTTCTCGCAAGAGATGGTCACATAAA  
CAATCGATATGGGTAACGTGTTTCCAGGAAGATCCTGGACGTTTGAGATGGTCCTAGC  
GAGCTTCTGGGAATAGCGGATGCTGACGGGCACTGGGTCTGAGAGTGCGTCGTTGTT  
CCAGTCCATTTTTGTCAGTGCCAGCGTTTCGTGTGCAATCGTTTCCAATGGTCCGCTG  
CCCGCATGGCGGGTCAGCAGGAGTGGGCGAGGGATGCTTTTACCTCCTTGGTAGTAA  
TCGGACTTGCTTGAAACGTGCGGAACATTGCCGGCTGCCCAGAGAAGCGCTGATGT  
GCCCCGACCGCGCGACGAACGTGCCGCGGGGAACCGGATATCGCGCTGGTTGCGTGG  
GTGGGGTGAGCCTGGAGCTTTGACCAACCACACGCCCCGCCAAGTAGGCCTAGAG  
CTGATTTCAATACACTCAACTTCGGGCACAGCGGTCAACGCATCGCGAGCACCTAGG  
ACTTCGTCTTCCTTGAACGCATTGCTCTTATGGATGACCATTGCCCCGGGAAGAATG  
CCTCCATTGCGCTGTTGGTAGATCGACAGACTGCGGGCAATGACCGCTCGCATGTCT  
TCTCGTGACAAGAACGGATTCCGTCGTGCTTCGCGCACGTCTTGACCGGATCCTTG  
GCCTCGAATGCCACGAACGTGCATGCCGCCGCCATCCATGTCGAACACCTGCGAGCA  
GCAGGTGACAAAGTGGGTTTCGTGCTTGACCCTCTTCAGCGCGTATGCCAAACCGAT  
GTAGGCGGTATCCGCGGGCACTCCCACCAGAGGGGCGAGCTTCCAAGGAATGCCGC  
CGGCTTTGACATAGAGCGCGATCGAAAGCCTCCATGCCAACTGCGCCTTGTTTGAGA  
AGCTGAAGGTTCCGGTCGTTGACCACCTGAGTCGGAATGCCGTGCTTTGCTCCCAATG  
CCTTGAGGACATCGTGCGCGTCGAATCCGTCTCCGGACGTATAAGGAAGCCACGCCT  
CTGGGAGATGGACTAGGACCACATCAAACCTGCTCGTGCCTTGTGCTTAGTTGCGAGA  
GGGCTGCCTCGAAGGCGGCCACCAGGCGATGTTGAAGGGTGCCGGAGCCTGGAAGA  
TCGTTCGATGG

>CONTIG\_71\_length\_6246\_cov\_14.468050

CTTATACAGCGCAGCAAGTTCTTCGTTTAGTGCGCCATGGTCACACCGTAAAAGTG  
AGCAATAGTGCATAATTCAATCAGTTGGAGAATTGCATTCTACTTGACCACCCTTTT  
ACATTGCCACTGACCAGTCATTTGCATTCGACGTGACCACGCGTTGCACAAGACTTG  
ACCGGCGCACTGCATGCCTTCGACCGGCTGGAGTCAACCCGAAGCAGGCCTTCGTTA  
AGGGCTGCTAACGGCCAATAGCAGACGTTCCCATGTGACTACACAAATAGGGTCTGA  
TTCAGTGGATCAACCACGATCCTTTGGTCTTCTTATCCATTGTATTTCCCCTAAGGTC  
CACTGCGGCCCGCCCTGTCCAGAGCTGAATAGCGCAAATCAGCTCTCTAACCAAACCT  
TATGCCAAACAACCCGCCTTCTTCGGTGGCGTCAGTCAAACGCTTGGGCAGGACATA  
GCCATTGAGGTCGAAACCATCGAGGGTCTCTTTGAAGGCATCGTCTTCATTCATCGT  
CACGATGTACTGAAAACCAAGCTCCTGGGCAATCTCAGAACCAAGGCGCAATGCGC  
TGATTACCTGGCGGCCGTCAACACCATCGAACAGGTGGCTGTCATGGATCAAGAATC  
CAGGCCCAATTTTTCGGCTGATGCACAGGCGCATAAGCATCATGTCTGAAGCAGAAG

ATTTGCATGTTCTTGATGCCTTTGCTGCGCTGCCCTTGCATCGGAACTTGAAGACTG  
GTCCATTCGAGGTTTCATCGATCGTCATGCTACCCGCCGATTTCATACAGGCGTTGAG  
AGGTTTCCTCGAAGGCGACGATAGCTTCAGCCAGCCTGTCCTTTTGCTCGGTGAAGT  
CACGCCGTAGGCGGATCGTGAGGCGGTTGCGCTCGATCTCTAGCTCGTTCTTGGTGC  
CTTCGAGCTGCTCTGCGGCTTCGAAGCGTTGCCGCAAGGATTCCACTTCGAATTCCA  
GCCGTCCCAGCTCGCCTTGACGTTTGAGGAACTGTTTCGAGCGCACCATGGCTCCTGA  
GAATGCCCAGGATTTACCCGCGCCTCTGGTCTAGCTGCGCCTTCTTACTATCACGTA  
GCTCGATACGCATCTTGGCGGCTTCGAGTTCGCTGGACAGATAGTCCCTGCGATTGC  
GCACCACAGAGTCATGGAACTCTTCACATCCTCGTAGCGGCGCTTGACCAAGTCAG  
GCAGGACGATGCCCCGCTCTTGGTAGACCGCCTGGAGATCCTCATGGTCAGGAGGA  
ACCTCGGAGGCGAGGGCGTTTTCCAGATCACGAATAGCTGAGAAGTCGATGGTATT  
GGCGTTGGCTAACTCGTTGAGCTGGCGGGTCAAGCTGGAGCTTTCGACTTCAGCTC  
CCGGTACTCAGGCAAGACCTGAAACGTCTCAACTTCCGCGTGAAGCTTCTTGAGGCG  
AGCCTCTTGAATGGTCAGCTCTGTGCGCAAGTCTGCGGCCTTGCCAATAATTGAGCC  
GAATGCACCGTTCCCGGCCCGCCTTCTTTAGCTCTTCAAGGGTCTTTTCCCGATCCCGG  
ACAGCTTGCCAGTCCCTGGCAATCTGCCAGTCCAGTCCGAGCAGGAACATCAGCGC  
CATCTGCATGTCGCCGGTACCCTGCATCGTGGCCTGTTTTTCCGGCGTCATGAAGGC  
ACCGCTCGCCTGTGCGGCGCACAAAGTAGGCAAACAGCGATCTGAACGAAGGCGGCT  
TGCTGCCAGCGGCTTCAAGGCTAGTCAGACCAAACATTTGTTTCGCCAAGGAACGTAC  
ACCACTCGGTGGCCGAGACCTTCACTTTCGCGGCTGGTGGGGCAGTCACGAAACTT  
TGGCTTTGGAGCCACCACTGCGTTCGACGACAGTGGGTTCGACTTCAAGTCGAAGT  
CCATGCCGAAAGTGTGCTCCGCCAATTCCGGGGTTCGGAAAATCGAGTCCGGCCCC  
GCGTCAGCACCAAGCAGAAAATGCACTAGCTCCACGAAGCTCGTTTTTACCAGCGCG  
ATTGCGTGTTTGTGTTTGTGGTCGCTCCCTCGGTTTTTTGAGCGAGCAGCACATTTAGA  
CCTGGTTTCAGATCTCCAAGATTCTTAAAGGTCGGCAGAGTACTGAAGATGTTGTGA  
ATCAAGCTGTTCTCCGTGTCACAAGGCCGCTTTCAAGCTCAATGATTCCAAGGGCGT  
ACAGAAGATCGAGGGAAAGTAAGAACCAGTCGTACGTAACCTCGCCGAGGCATGGCA  
GTCACGCTCGTTTCATGCCTACTTAGCTCCTCCCAAAGTGCGGAGACAGTCTTTGGC  
CGTGTGAGAAACGTCAGAATATGACCGCCGACGGTCAACAATGCGCGATCCTGCGG  
AAGATGCTTGATGGAAGGATCATGCTGTCCCCACCGTTTGAGCGTCCTCGAAAATT  
TCGCACTTGTGCAAAAGGTATGCCATGACTGCCAGCACTGCGGCCTTATGAGTGGGA  
GTGGTGTTTCGCTGAGCCGCCAGCCACGCTTCAAGGCGACCGAAAATTTTCATCAGG  
ATGCAGTAGAGGAGCGCTATCCCGTAGGGCTATGTATTCGCGCTTGAACGTCTGTGC  
AATTTGTTTCGCCGTAGGTAGGGTTCTTCCAGTTATTGAAAACTGCGCAACGAGCGG  
TGACTTCTGCATACCGATCTTCAGGAAGTCGGCCACAGCTTGAGACAGAAGGTTTGC  
TTCGATCTTCCACGTGATACGTCTTTTACTTCGCTAGTAGTGGGCACTGGAGTGACA  
CTGATGTGGCTGAGCACGGCCATCAGGTCGCTGTAGCCAGGTTGACATTTGCCTCC  
ATCGTGAGCGACGGCCCAAACCAAGACTCAAGGTCCTGCAAGCTCAACTGACGAAA  
CTTCGCCAGCATTTCTTCGTATCCACAGTGGCCGATTCTGATCTGCGGGTTGTCTTGC  
CTGAGCTTCGCAAGAGCTTCAATGATGTGAGGACCCAAACGGCCATCGGGTGCGTT

GTGCACGAAGGTCCACTCATCGAAATGCTGCTCCCAGTGGTCTTTCGCTCCCTCGAA  
GTCTTCGTTGATTTTCTTGATGGCTTCAGCAGCGCTCAACTCGTTGGGGGCATAACTC  
TGGAACAAAATTCTTGCCGACGGCAGATATCCATCGTTCTTGCGGTCACCAACTTTT  
CCCCAAGGCCGGCAAGCCATGAAGTCGTTAGGGTGGGCTTTCGACATTAGCCTCTCG  
AAAAGACGTTGAAACCCGTCCCCCTTGGTTTCCAAAAATGCGATGCGGAAGTCTTTT  
TCATAATTGAGCTGCTGTATGCGATCCATGCGTTTTTAGGCCCGTGGAGTATTTTTCT  
TGATTTTCTTCAGGCAAGCCTTCAAGGCTTTTTGATTTTCGGAGTGGGACTGTGCTCGA  
TTGATATCAAATGGGATGGCCTTGTCCGCCGCGATGCGAACCAGCAGCATCCGAATC  
GCATCCGAAACAGACAGCCCCATAACCAGCCAGCACATGGCTAGCTTCATCCTTGATA  
TGGCCGTCGATCCGAGCGCGAACGACATCACTGTTTGCCATTGGATTTCTCATAGCG  
ATCTGTAGCTACATTGTGCTCCAATTGGGCTGCCATGTCAATTTGCTTCTTGCTGAATT  
GGGCAGGTGTCCCGGAGTTCGCCCGTCACGCTCGGGGGCTGTCCCCCTTGACCGGTG  
CCGAGTTACACGATCCTTGATGCCTTGGGCCCTTTCACGCTTGCGTAATCTGTCTACT  
AATACGTGGCATGGGTGGAGCGCGAAGGTCTTGCTGCCCAGTTTGGGCAAGCTGGA  
CGTTCGCCTCGCCGCCAAACCCATTACGGGCGTTTCTAGCGGAGCGGGGCCAACTCGG  
CGCCCAGATTAGGACGTTCTTCCGTCAGGCGGTTGGATACGGCGACAACCTTGCCAGG  
CGCTTCTGCCGGAAAATTCTGGCCGAAAAAGGCGCTCCACCATTGGCTGCTATTGGC  
CGATTCTGTTGAAAAAGTCGGTTTTTCCCAAACCTGCGAGCAGACTGATCGGTGAAAGC  
ATCTTTTTTATCCGCTGCCACGTGAAATCTGAGTCTGAATACCTCTGCGCCGATTCTA  
GATTTCAAGCTCAGGCGCGTACTTTTCTGCTGTGAAAACACACCCGACTTTTTTCAA  
CAGAATCGGCCGATAGCTGCCCTTCGGGGCATGCAGCTACGCATGTTCAATCAAGTC  
TGGTTAGCTCAATATTAATGTGTTGCCGTCTCGATGAAGCCAGCTTTGATCAAGTCT  
GCGCGCATTTACCCAAACAGCTGTGGGGGACGGCAAGCCAAAAGAGGTTTTTTCGC  
TCTTGTCAGTGCCACGTAGCCGATCCGGCCGTCTCCTCCGTACCCGTGCCGGCCAGCAA  
TGCTGTGATGTTGGCCTTCGTGCGCACGTAGAGCACTGCGTCGATGGATTTCGCCTTTT  
ACCTGGTGAACAGTTTCAACTCTTAAGCCATGAGCTTCCTGGTCATCAGCTTTGGCA  
CCGCTGAGTGCAACGTCCTCCAAGCGCTTCTTGGCCATCTTATTTCCGAACGTAGCA  
ACTGTTTTTCAGCCGAATAGTTGATCCATTTGGGTAAAGCAAGGCGCGCAGGTTTGCG  
ACCAGCTTCGGATGCCACTCTGCTTTGGCTTGAGCGAAGAAGGCGGAAGCCCCAT  
CTCTGCATTGCGTGTAACGCCCATAGTAACCGCCTTAGTTTCATCATCCAGACTTCA  
TGAGGCGAGCCCTGCAGCGCCGAGCTGAGTCCAAGCGGCGCTTCATCGATAAGCTC  
CACAATCGCCTTGCATACCAGACAGAAAGCCTCCTGATAGCGGCTCTGCTGATCGCG  
GGCCAATGCAGCCTCTGCAAAAATGCTCACAACTCCCTGTCCTGGGGCGGCTGTTGT  
ACCTGCAAGCTTGGCGGCGCGATCCGTGTTCTGCTGAGAATGACTGCGTCTGCTGC  
CGGTATGCCCAGCTCCCCAAGACGAACTTGGAAGAGTTGATCAGCTTAACGTGCTC  
TGCGTCCTTGTAACCTAAAAAAAATGCTCCACCCTGCCCAGGTTGCCTGTCTGGCTC  
ATCGGTTTCGGCCGCATAGGCGGTTTCGCTATATCGATGATGGGCGGGAGGGAGCGAT  
AGTTGCGAGTGAGCTTGTAGTCTTTCCTCCCGGACGTTTCGGCGTAGGTTTTTCAAAA  
ACATGCCATCAGCGCCAGCGAAGGCGAAGATGCCCTGGTTAACGTCACCGATCAGC  
GAAATCTGCACGCCCGCCTTCATGAGTATTTCCAACGTCACCTTGTGTCATCGTGCCC

AAATCCTGCGATTTCGTCGACCAGAACATGCGGATAGCGGGTGGCCAATGCCCTAAG  
AATGGTAGGTTGATGAAGCAGCGTTTCGAATTACCCAATAGCGCCCTAGGTCATGGGT  
GTATGCGCCAGTGCGCCCCAGCTTTTCGATGACCTCCTTGGCCTTTGCATGATCAAGT  
TGTTCCACCTCCCTTTGGTGTCGACGAAGAAGACCGACTTTCGATTCTCTACGCCC  
ACCTGCACATCCTTGATCGGGATTGGTCGTTTCGGTTTTGCTCTTCCAGTACTGGAAGC  
TACTTAAGAACGGCTCCGAACCCGATACAAGATAGGGGGTTTCGGGTGGCGCCCATG  
GTGCGGTAGGCATGGGGGCGCAGAACATGCTGGGTGAAAAATCCGTCTAGTGTGTC  
CACTTCTATGCGTTTGCGATTAGCGTCGTCCGGCAGATCCGAGGCGAGCTCTGCGTA  
GCCCTTATTGAAGGTATTCACGGCCACATTGGAAAAAGACAACAGCACGACGCGGC  
CGCGGTGATCGGCCAGCTTTTGCCGAATGGCGATCAGTCGCCGAATAGCGGTGGCTG  
TTTTACCACTGCCAGCGCAGGCAGTGACTGCCATCGGTTCTAAGGGCGCTTCGATTA  
CAGCTTTCTGCTCATCGGATAGCTTCATGGCTTGTAAGCTCCCTGGCAAACGTGCTG  
GATCGCTTGCGCGAGGTATTCAGGGACTTTGAATTCGGGCGTTAAAGCAATCTGTTC  
AGCAAGCGCTTGGCCGAAGCCTCCCTTCTGCACATTGCTACTGGCGTCTTTGCGTTC  
GAACCGACGTCCCCCACCCTGAGTAGTGGCTTGGTTTAGAGTCCGGGGGTAATGAT  
ATCGGTGTTTGCCAGATGTTGGGCATACGCAGCCGGGGTCATGCCGCCGATCGCCTT  
CTTGGGTTCGGTCCTCGTTGTATTCGCGTCGCCAGCGTTCGATTTTCGGTGCGCGCGTGC  
AGTAACGTCGGAACCAAGTGCTCGTTGAGGCATTTCGTCGC

>CONTIG\_72\_length\_6243\_cov\_18.649117

GGTGTAAGCCTGTGTAACGCTTCCGACCTTGGCGCTGAGGCGATTGCCGGTGGCGTC  
ATAGCTATAGCCGTCAATGACTGTTCTGTGATGCCATCGGCGAGGGCAGCGAGGC  
GGCCGAGCGTGTCGTAGCCCAGGCCGATCTCCGGCGTCGGATTGCCGGCTGGGGTC  
AGTGAGGTGAGATTGCCACCTCATCGAACCCGAACCCGACATCCAGACCGCCAAC  
CGCTTTGTCTGAATGGCCTTGGGGCGATAATCCTGGTCGTAAGCTCGGGTCAGCAC  
GCGGCCGCTGCCGTAGGTCCAGCCGGCCACCGGGCCCATGGGCAGATACGTGGCAC  
CCTTGACCAACACCTCGCGCGAGCCACCAGGCGCGGTATAGCCACCTCGGCGATCT  
GGCCCAGCTCATTGCGGACATAGTCAACCATCGCCCCGTCCGGATAAACCATGCTCG  
TCAAGTTCCCGCCTGCCGCGTAGGCATAACGGACCGTCAATGCCTTGCCATTGGTCG  
TCTGGACCTTGCGCACCAGGTCGCCGAATCGGTTGTAGCAATACTGCGTCGTGCCGC  
TGCCGTCCTTCATGCTAGCCAAGCGCCCGGCTGCGAATTGCTCTCCCGCCACGCAGA  
CGGCCGGGGCCACGTCGTAGACAAAACGGGTCTCGAGCGCTGCATCGGCATAGGTC  
ACCGACACTGGGCGGTTCAAGGCATCGTAGGTGTAGGTGGCCTGCCGGTTAGCTGC  
GTCCTTCCTGGACAGCACGTTGCCTGCGTCGTCGTAGGTGAAGCCGGTGCTGCCCCG  
GTCGGGACTCTGTAACGCCAACAGTTCGCCCAGACCATTGCGCTTGTAGGTCGTCTT  
CAAGCCTTTCGGGTCCGTCACCGCTGATAGCTGTCCCAGCGCGTCGTATTGGAAAGC  
ACTCGTCGCCTTGATGTCGGCGGTATCTTCAATACTCTGCTTCAAGCGATGCAAGGC  
ATCATAGGTATAGGTGCTTGACCTACCCATGGCATCTATCCGCTCCTTCAACGTGCC  
CACTGCATCGTAGGTAAAATCCGTTGGGTTGCCTTGCGCATCTGCGGTTGTTTTAGG  
TGGCCTAGCTCATCGTAGAGCCGGGACATGGTGGCCTTAAGCACACCTTTTGAGTCC

TGGATTTCTCCTTAACCTCGCCGTCCGGATTTGTCTGAGCGTGTAGACGAAGGAGTTG  
CCGTAACGATCCGATACCCTGGTCAGCCGGAATGCGCTGTCGTAGGTGAAGTTAGAC  
ACGTCGCCGCCCGGCAGCGCAACCTGCTTGACCAAGCCGGTGGGCCAATAGCTGTA  
GCGCGTAATGCGGTCATCCGTCTCCGAGCCGCTGTCTGTCCCCGGACCATGCTTGC  
CGTCAGCCGGCCTCGCGCATCGTAGCTGTAGTCGGTCACAACCCCATTCGGATCCTT  
CTGCGACAACACACGACCGGCGCTATCGTAACTGAGGAGCTGGGTGACCTGGCCCA  
CTGCATTGGTGATCGTCTTCAGGTCTCCGCCCTGGGCCGCGGGATAGTAGTCGTAGG  
TGGTGGCGTCTGAGATCCGTGCGCGCTCCGTCTACACGCAGCAACACTCCCACCA  
GGGGGCAGCTTCCTGCGGTTACGTCTGGCCTGTCTGCAATAGGTGAAGGTCTGCTGAC  
GCTGCTTCCCGGAAAGGGCATCTTGCTCGACCTGGGTGAGTGTGGCCACGCTCAT  
TGCGAGTCCATCGCTTGGACACAACCAGCCCCCTGCGCCCCCTTCACATTGAGCTCGG  
TCAATTGGTGGGTGAGCGCATCTCTCACTCTCTCGGTGCGCACCGCCTCCGGCGTGC  
CGTCGCCGACCGTACCGCCGATTGATACGCCGGCGCGTATTCGTAGGAAACCTTGC  
TGCCCGATGCGTCCGTACGCTTTGACGCCGACCATCGCTGAAGTAGGTGTTGGACG  
TGCTTGCTGGGCCTTCGGTTACGTTGTTGACCGGGCTGAAAATGGTAGACCCATACT  
CGAAGCGCTTGACCGCGCCAGAAGCTTGTGTGACTTCCGTAACGCCTTCGGCCACGT  
AGTTCAGGGTCACTCCATCGACCACCTCGGTATCGCCATGGAGAACGCTGCTGATCA  
CGCGTCCATAGGTGTCGTAACCAAACGAAGCGTAACGCTGTCCGTTCTCCCCAGTGA  
TACCAGTCAAATAGTTGACCAGCTGGGGCTCCGCAAGCCCCCTTCTCATGATAGTGGT  
AAAGGCGCTTTTCGCCGTCGGGATACGTTGCGACAATCAGATTTCCATCCACATCGT  
AGTCGTAAAGGACGATGCCGCCACCAGGAATCTCCATGCCTGTGACACGCCCGTCG  
GTATAGGTGAACGTCACGGCGCGGCCATGGCCATCAACCAATCGCGCAATGCGCGT  
GCCCTCGTAAACCACGGTTACATCACGATCCGGCGAGGCTGGATTGCGCACCGCGA  
GCAGCTGGCCATCCTTACCGAAATCGCGGTATTCGCCAGTTTCTTCGATGACCCGGT  
AATACGTAGTGCTGTTGCTGATGCGGCGATATAGCCGCCCCGAATTCTGAGCACGGC  
CGGTGCCAGCAGCAACCGTGGTGAAAACATCCCTGTTGCCCGCCTCGTCGATATAGG  
CTGTGTTGGAATATCGAATCGATCGCTGTAACCTCAGCGACCAGCCTTCTCCGACCG  
GAATGACACTCTTGGTCTGATTGACAGAATGATAGTAGCGATTGAACGAGCGACCT  
GCGAACTCAAAGTCTTTCTCTTCGCGAGACTTGTGCGCCTGTCGTAGGATGGCAAGGA  
TTGTTGGTGCTGCAGCTTTGGAAGTGTCTTAAAGGTGAGGTGACCCAGGTGTTGTCA  
TCGTTCTTGGGCTTACAAAGAGCCTCCGTCTGTAAGAGCTGCCTCCGCGAGAATTGAG  
TTCCCCAGAAAAGGCGTGAAGTTTGCTTCGCACGTCAACTTTCGCTTTTTGTAGACAT  
TCCAGCGCCACGACACCGAGACAGGTGCCCCCGAGTTCGACGGACAATTAAATGTC  
GAGGTGAAATATTTGTCTGAGCTATAGCTAACATCGCCACTTGGAAGCAGACCCAGT  
CCCGTCGTGTTGTAGTCCGACGTTTGAACATTGGACTGGAGCGAGCAAGATTTCCCG  
ACCTTGGTGCTTAGGATGTCCAACGACTTGGCGATGAGTGCTCCTTCATCCGTGCAC  
CAGCTTGATCCAACTCTGGGGACGGTGTGCAGCCGGGGTTTCCGACCCCGTAGATA  
CCTAGGTTGACCCCATAGGATGGGTAGAGACCGAGGTAGCCTTTAGCGACGGCAC  
ACGGAAGTAGGTCCAGACCTCTCCCGCCCCCGACTCAAAAAACCTCTTGAGTAGG  
CCTTCAAATACTGACCGATGCCTTGGTAGTCCCTGGAGTTGCGAATGGCATCGGCCG

CTTTCTCCATCGTGTCTGTAGCAGCCGATGCCCCGCTGCACAGAACGTAGCCTTGGGCG  
GGGTTTGGGCTGCGCAGGGTTAGCAAATTGCAATGCATAGGCCCAAGAACAACC  
GGCGCCAAGAGCGCCGCGTAACGCGCGCTCATTGACAGAACTGAGGAAGCAGAGA  
AACGCGCCACGGCCCGAATTGACACGGCAACACTCCTTGTCAGCTGCACTTGCAGC  
ATCAGTTAGGAATCCATTCCCACCCACCCACGCTGGCAGCGGTGGTGATTACAACC  
AATCCCATGAAAAGGACGGCTAAGCGTTAACGATATCGGATTAGCGATGCGGGCGAC  
AAGCAAGGCGTTTCCAAGCAGAACTATCGTCTTAAATCATGGTGGCATTGTCAGCG  
GCAGTGGTTCGGGGCACCCCGAATGCAACGAAGTCAGACCGTTGCAAGAGCCTGTT  
CGGCAGGTTTGCTTTCAGTGTTGACATGATCAGAGCTCCACGCTTTTCCCTCTTGCTA  
GCGCCCGCTTGCCATGGGGGAGTTGCTGACGCCATTGTCTGTCTGCGTAAAACTTGG  
ATCTCGCCGGCATGAGCAACCCAAACAGCCCGCATGAAGCAAGTGTCGCGGTATTG  
GTCGACTGCGACAACGTGCCGACCGACATCGTCGAGCACGCGTTGCTCATGGTGGC  
CCAGTTCGGCCGGGTCGTGCTGCGCCGTGGGTATGGCAACCACAACACCCTCGCCA  
ACAAGTGGCAGGAAGTCCTGGTCCGCCAAGCGTTCACCCCTTGCCTTCAATATCAAT  
ACGCTCCCGCAAGAACACGGCCGACATCGCTTTGGCGCTCGACGCCTTGGAGGGC  
TTGTTTCGATCACCGAGCCGACACCTTTTGCTAGTGACGAGCGACTCGGACTTTTCTT  
ACCTTTGCCGCAAGCTCCGGGAGCGTGGAGCGACGGTCTTCATCGTGGGCGAGCCC  
AAGACCCCGGATGCCTTGCGCAACGCCTGCGACCAGTTCTTCGAATGGGACCGGAC  
GGCCAAAGAGGTGGCCGCACCCGAAGTCCAGGGCAATGAACTGCCTGTCTGAAAT  
CGGAAGCGACGAAAGAAGAAGCCCCCTCGCGTAGAAACCAAGCCACTGCCGAAACG  
GCGTCCCCGGTTCTTGGTCGAAGCCGTGACCCTACTGACCGGCGACACTTCCGAGGG  
CAAGGTAGGACTGTCAGCACTCGGCCAATACCTCAAACGCACTGACCCATCTTTTTTC  
GCCCAACCTCTACGGACACTCCGGGCTGCTCAACATGGTGAAAACCTATGACCTGCT  
GACAACGCAGCGAGAGGAGACCGGCGGTTGGTCGGTCAGCATCTCGCACAAGCCAG  
AGGTTCTCGACCAGACGGGATGATCCGCACTGGATTGATGACCGCCGTGGGGCGAA  
AACCTTACGTCACGGCATGTGAGCTACTCCACCAGGGTGAAAGCAAACCTTGAGCTTG  
AGGAAGATGCCGCTCCATCCCGATCTGCTCGCCCTGGACTTCCTGGCCTGGCCCCGG  
CGCGCGCGCCGGGGGCTAGGAGCGTTTGTCCCCAGCGGCCAAAGCCGACGCCAAAA  
ATGGTCAAGGCCACTGGATTCCCAAAGCGTTTAGCCGGCACCTTCCCGAAGGTCTAT  
GGCCTCAGCCTCAAGTCCATTCTTTCCCTTCTTTTCGCAAGCCTATGGAAACAGGAAA  
TCATCGGGCGCACAGCCACCACACTAAAGAAAGGAGTGCGGCTTTTGGCTTGACGG  
CGAATGATTATGGTGCCTAATGGACGGCCGCATAGCGGCACACATCTGACCTTTAGT  
CGCAGCAGGTGAGATCAATTTGACCACAATGTCGCTTATCCAAGCAGACTAACAAC  
AATGACCGACTCTACGTTACAGCCAATTCCAAGCACCTTTCAGATGCTTCAGAAGAT  
CAAACGCCCCGAAGAGGACAGGCAAGCTTGAGCGCATTGAAAACACTACATATTTTTTG  
GATTACTGGCTCTCACAATTTTCGGCCTCGGCGTATTTGCCGCCGGTAATTTTGAATG  
GATCAGCAAGCCGAATGCTAAGGACATCCTCGTGGTGATACTACTGGTGATGGCGG  
TTGGATTCTGGCGCTGGGTCTCCTTCAAATCGCTCAAGTCTTTTTAGCCGGGAAAG  
AGGGCTATGAACCGATGGCAGAGCGAATCGACACTGCCATCTCCATGGAGAGCAAG  
ATTCTGGACGAACTCGGCACATGTAACCCGCAGACTCTTCGAGAGCGCTCGAAGCA

CATAGATCTTGAAAACAAACTCTTGACTCGCCGAGCAGGATTATCCACTTTCTTCGG  
CGCCATTAGCGTCGTGTTGATCAATCTTTTCGACGCCGGTGAAAAGGTCAACATGTG  
GGCCAACCCAGCTATCGCCAAAGTATTTGTTTACGCCGGAAGCCTTGGCATCCTTAT  
CGGCTCGATCGTTGTCTTTATCTTGGCCGGAAAGCTCGAGCGCATTGCAGGACTGTT  
CGCACTAGCGGCAGATCGCATTGAGCAGAGGCAGGGGCCAAGGCAAGGGATCGGC  
TAACGCAGCACGTACGACAGCCTCGCGCCGCCCGCCAAGCTTCCATTCCCAAATT  
GACATACAAACCATTGAATTTCTGCGCGCATTCAAATTTGTGAAACACCGCCCGAAG  
CGAGCTCTTGCGGAAGTGGCGATTCTTGGTTGGATGAGGACTTCCCCACACACAGGA  
GTTTTTCATGACCACCCATCCCCAACAACCTCGAAATCGCTGGCCAACTGCTTGCCGGG  
CTGATGAGCCAAACGCTCTCTGACGAGCCACTGGTGCGCCAACGCAATGTCTGCAAT  
GCCTGGGCC

>CONTIG\_73\_length\_6229\_cov\_5.841527

ACTTTCATGCGACGTCAGACCTCCTCGCGGAGGTCATTCTGCTGGTCGCCAAGCTTC  
CCGCCGCAAAGCAAAAAGAAGCACTGAAACGTTTTCGCGGAAATTGCGGAGTCAGCT  
GAAGGCTGATGCCGGCCGTGCCGTATCTAAGCACTCGCTGTGTCTTCGAGTCTCGGC  
CACGTGGAAGCTACTCACCAAAACGAAGTGAATAAGTTCGCAACTTCATCAAGTT  
CTTGGGCGCAGTTTTAGCTTCCAAAGGTCGGCTACGTGTACGATTCAATAAGGCCT  
GGCACATGTTGAGCAAGCTCTGCGCGATTTCAGAAGAACAATCTGCTGTTTCGTTGCCT  
GGCAAGTCTTCCGTGCGACGATGAACTCCGAGTCGCCGTAAGAGGTAGTAGGCCAA  
GCATTGGCGAGTTGATAGGGCCAATTGCCCATCGACCATTTTCGTAGTCGAGCTCGAT  
AGCCCTTCGCTGCCCTGGTGACAAGTCAGGGTGTGGGCCGATCACGATCATAAGCA  
GACGCTCCCACTCCTCATCTACTTCTGGAACGTGCTGGGCGGGCAGGGGAGCGACAT  
AGTCCATCACGCGAGCGAAGACAAAGTCACAGAAAGCCTCACGTCTATGGCAGAAC  
GCGCGCACGTGCCAGCGGGCCCCATCGTATGCGAGCCCGCGCGGGCTGATCTGACG  
CCGCGTTGGCTCGGGTTCGACTCATGGACTGGTAGTTGATCTCGATGCTATCCCCCGT  
TCGAATCGCGTCCAACACCGCTCGCAAGAGGTCAGTCTGGACAGACCTAGTGGGGT  
GTCGAACAATCGCCGTCTTTGGCACGTCTGCTAAAAAGCTAACGTCCGCAGGAATCA  
TTCCGGTGGTCAGCGCGTAAAGCTCTGCCAAATATCTGCTGCTGGTCGGATCTACCA  
ACAGTGGGCGGAAACCGGTCGCAGCGCGATATGATTTCTCGCTTCGATCGTAGACCA  
TGTTTTTCGGGCGCCTGCGCCTGATACTCGCTCAGGTCCAAGGAAGCTTGGGGAACTG  
AAATGCCGAAAAATTTCGGTCAGCGAAGAGCGATTCAAGCGCCCGCTCCATTGAAGG  
CGGGAGTCAATGAACTCAAGGCGACGGTCTTGGCCCCAGCGGCCTCGACGGTGATT  
AGCAGTTGGTTCCATAGTCTCAATAGTAAATGAGAAAGGGGTGATTCACTATCCGCT  
TATTGACTAGGTGCATCTAGTGAGTGTACTTATTCTACACCGCGGGCCGCTGTGACG  
CCCGCCTCAGGAATAGGCAGGTTTCATATGACTCCGATGCTCACCTTCTTCCCGGTTG  
GGAATGGCGATATGACGTTGGTTCAGCTTGTGATGAGAGTTCCATCTTGATCGACT  
GCAACATCCGCAAGGCAGCCGATGACCCCGCTGACTCTACGGCGCGCGATGTCGCC  
AAGGATCTTCGGCAGCGTCTCAAGCTGGACGAAAATGAGCGGCCCTACGTAGATGC  
CTTCTTGCTAAGCCATCCGGACGAGGATCACTGCCGGGGCCTTTGCAATCACTTCTA

TCTAGGGAGGTTGGAGGACTACCCCGACGACAAGAAGCCGGCAGCAGAGAAGCGG  
ATCGTCATCCGGGAAATGTGGTCTTCGCCCATCGTGTTCGCCGGGCTTCCGATGTG  
CATGTGCTGTGCGACGACGCAAAGGCTTGGGCAACCGAAGCCCGTCGTCGCGTCGC  
TCACTTCAAAGAGTTCGGATGGGCCGGCGCGGGCGATCGAATCCAGATTATGGGTG  
AAGACAAAGGCGAAAAGACCAAGGGTCTAGAAGCCATCCTCGTCCGCAGTGGTGAG  
TTTGTGACCAAGATTAATGGGATTCACAGCTCACATTTTTCTGGTCATTTGCTGGCAC  
CGAGCTTGGTTTGCGACGACGACGAGGAAGTCTTGCTGCGAGCGAAGAACCAGTCC  
AGTGTCACTCCTGAACATTGAAATCAATGCAACTTGGGCCGGCATCGCCAAATTCCGC  
TTCCTAACTGCTGGCGATGCGGAGGTGGCTATTTGGGAACGCCTGTGGAACAAGCAC  
AAGGGTGCGCCAGAAGTGCTGGCATATGACGTTCTACAAGCGCCTCATCACTGCTCC  
TGGCGTGTGCTGTGCTGGGACAGCTGGTCCGGCTGTGGAGAAGACGCTGAAGTCTCT  
GCAGACGCGCGTTCTGCGCTAGGACAGGCGCGATACGGGGCTAAGATCATTGCTAG  
CAGCAAGCCGGTAAAAGACAAGGATGGCGATCCGCCCTGCACACGTGCTAAGCGGG  
AATACGAAGACATTCTCGACGACAAGTGTGGAAAGTTTCTGTGCACTGGGGAGACG  
CCCTTTACTTGGTCGCCTAAGCCTATTGAGATCGAAATCACCACCGACGGTCCGCGA  
GTTTGTCCGGTGGAGGCTGCCACCGCTGCTGCTGCCACTGCTGCTGCAGCGGCGCCG  
CGAGCGGGCTCCATTTAAAATGACTGACTACTACGAATGCGGTCAGCCAGCGGAGA  
TGGCCGATGCTCAGGCTGAAGGCCGGCGATTTATTGAATTGCTGGAGGCATGTCAGC  
AGCATTCGGACGTAAGGGTTCTTGGGCTGCTTCGGCGGGGAAATCCAGCACAACTTG  
GGATCGTCGTTGACGTGAGCGACGGAAGCGTGGCCCCAAAAAACCAGGTTGGCATT  
CAACCAAGGGAAAGGCTTTGGCTAAGTCTCGACCCGTCGGGCAAACGAGCGCCGGA  
GGTTTGCGCATTGCGGCGGCAGTTCGCCAGCTTGCTCCATCTCAACGCGGTGCTAG  
CAATGAGCCGGCATCCCTTTGTTTGTATGAGAGCTGGGCTCATGAAGGTCGGCACTG  
GACTGCCCAACGTCACTTGCAACGAATTCTGTGGTGGCTACGTGAGACTGCTAAGGG  
TTCTTTGCACGGAGCTGATCAGCCGCTGGAGCCGCTGTTCTACGGCACTGGCTATAC  
CGTCATCTTGCCATCGGCATTTCAAACCCAGTCGGCTGATGACCTTGGGGCTATTTGT  
TTATCAGCGTTGAAAAGAGATCCCTCGGGGCTCTACTTGGTCGCGTCTGACGCCACG  
AATAGTGCCAATCAAGTGCCAATCCAGCCAGTGCTGGTCGAGCTTTCGCTGTTGAG  
CACGTTCCGATTACAGCGCCCGCCTACAGACTTAGGTGGACTCGATGAAGCGCTGTCC  
TCCTTGGGGATATCCATACTCGAGCCCTTGCGTGAGGCGTTGCGTCGTCAGTTCGCT  
ATCAACTCTTCAGCCGGACGTCCAAGCGGAAAGGCTCTGTTGATCTTGCGGTTACCC  
CGACTTCGAGACGGTCAGGTGGAGCGCATCGACACATGTGCCTTTCTTACAAATGTC  
GACATCAATAGCCTAGGACTTCAGATTGGAAGCCTGTTCCAGCCGATCCCCGGCGGT  
GATCCGTTTCGCCGTTGAAGAGCTTCTGGGAGCCGACGCGGGACCATCCGATGAGCG  
GTGGAAAGCGGTGGAGATTGTGCTTACCGAGATCAAGACCATTCCCGTTCGCTCGGA  
CGCACGTCAATTCTCAGGCATATCGACAACCTGAAGGGGATTTCTCCGCTGTATTGGC  
GGGAGTAGGGGCCTTGGGGAGTGGGCTGGTCGACACTTGGGTCCGAGAAGGCTGGG  
GGCGGTGGACGTGCGTCGATCCCGATTATGTCGAGCCACATAACCTGATTAGGCACA  
TTTTGACTTCTAAAGCGGTGGGGCATCCCAAAGCCGTGTCAGTTTGTGCGCAACTAG  
GCCTTGTTTTTGAACAGAAGACTCTACGCCCTCTGCCATTGTCGCTGAAGCCAACG

ATTGGTCTAATCCTGCAGTGACGGCAGCCTTGGAGGGGGCAGAACTTCTTGTGGACG  
CCTCGACGACCATCGATGTGCCCCGTGACTGGTCTGAGCGTGAGCTTCCTCGAAGTG  
CGTCTGTGTTCTTCACCCACAACGGCTTGAGTGCTGTGATGTTGCTTGAGGATGCTG  
GGCGCACCACCCGCCTTGCATCACTCGAGGCGCAGTATTACAGGGGCGGTAATCAAC  
GAAGAGTGGGGAGCTAACCATTTGCGGCAAGGAGATCAGGTGCGAGTTGGTCGCGG  
GTGTGCGGATCACAGCGTTCGATTACCCATCGATCTAGCAAAGCTACACTCAGCCCA  
CCTTGCGCGGCGTCTCCGCCTGAGTGTGCGCCAACTCGGATGCTTGCGCCCAAGTCTG  
GACGTTGGACGATGCCACGGGCGCCCTCTCCACTGACTGCATCCAGTTAAGCAAAA  
CCAAGCAGGTGCACATAGGAGATTGGCATGTCCGCTGGGACGAAGGTCTCGAAGAA  
AAGCTCCACCAGATGAGGGCGGAGCAATTGCCGAATGAAACGGGAGGAATCTTGGT  
TGGAGTGGTCGACCAAGTTCTGCGGACTTTGACACTTGTGGATGCTTCAGCTGCCCC  
GATTGACAGCGTTGCCGACAGCGTCAGCTTCGTGCGAGGCAAGGAAGGGAGTCAAG  
AATATGTTGAACGGTGTGAGGTGCTGACGGCAGGGATGGCAAGCTACGTGGGAGAG  
TGGCACGCTCATCCCGAGGGATGTTCCGCCAACCTAGTTCAACAGACGTAGTGCTG  
TTGAGGACACTCACCGACCGGCTGGCAGCCGACGGTGTCCCGGCTCTGATGGTGATC  
GTTTCCGCAGATGCAGTCAGCATCTCGCTGGGTCAATCTGTTGTTCCCGTAAGCGAG  
TAGACGCTGTAGATCGGGTGCTACTGAGTAAGCCGGAGCCTGAATGTCAAATACAA  
ATGCGCTGACCGAAATGATTCCCTTGGTGGCCGATCCTTACGATCGGAAAGCGAGGC  
TTGCGCCAGCTCTCATTGTGCTGATGCCCTTGACTGTGTCGTTTCATCGTGGCGTGTCG  
TGAAGACCTTGATGCCATGAGGGTTCTAGCTGCCATGCTGGTGACCTTCTGTGCGCC  
ATTTCTACTTTGCAGTATCGTGAGGTTTCAAGGAAAGCAGCTAGAGACGAAACTGGT  
AGAGAAGTGGGGCGGTATCTGAGGTATCCCCACGTTTTTCAGTTCAGGACCATCTGG  
TTGTGAATGTGTTTCGGGCAGTGTGCGTAGTCGCGCTAGCCATTGGCTGATGAGCTCC  
ATCGGCCAGCGTCTGCGCAGGGCTTCGCGTCCGATGCGCAGCGTTGAGTAGAGTTTT  
CGCTTGCTTTGCGTGCGGACAGCCAAGCCGCGTGACCGGATTGCTCGCTGGCCATG  
CCCGCCAACCAGCACGCAAAGCTGGCAAGTGTGTTGAGCATCAGCAAGATGCTCAG  
GCGCGGCCCTTGCGGGTTCAGGCTGTCTTCGAAGGCTGCGCCGTAGCGATGCGACTT  
GAGATCACGGAAGCTGCCTTCGATCTGCATGCGCCGTGCATACAGACCGATCAATTG  
ACGTGCGTTGGCCTCGACAAGATCTGGCGAGGCAATAATCAACCAGGGTTTCGCGTTC  
GCTCGCAGCAGCCTTGCGGCTGTGCGAGCTGCGTGCAACTTCGCTGCGGCAGCGTCG  
GTTGTAGTGTTTGCGGCCACGCGGTGATTTGCCATGCACCACCAGCCTACAGGCCAG  
TGGATCACTTCGATTGATGTGCATCAGGTCCAGCTCGCGCGGCTGTGGTTGCACCAG  
CTCCCAGAGGGAGCGGCATGACACCCACTGGTTCGGGCTGATCTTTACCTCGACAG  
GCTTGACCAGCGTGGTCCCGCGCAGGCGTCCAACCCAGCTCCATCCAATTGCTTGCA  
CCGCCCTGAACCAAGGCGTGCGGAAGCCAGCGTCGGTGATCAGGATCGGACGGACG  
CCGCTGGCATCAACGCCTGCAATTGCTTCAGGAACTGGCGCTCAGCACGTGGTGAG  
CCCTGTTTCGCGACCGGGGTAAACGCGATCCAACAGGGTCAGCGTCCGCCCACCCAC  
TGGCACAGCGGCACGCAGCAGACACCACGATTTATCGGCCTTCAGATCGCTCCAGTC  
AATCACGATCAAAGGACGCGGGCTGCGCAGCAGCCAGCGCGCCATCGCTGCATGCA  
GTGATAAGCACTCGGCGTGAGATGATGGTTGCTCAGCAAGCGATCCAGCGCCTTG

AGCGGTGCACGCACGCGTTTCGGCACCGGGCCAGCAACGCGCTAGGTTCGATCAGCGT  
CAACCGCCAGCCTGAGGTCAGCGCTTCCACGGCCTTCAACAACACCCGTTGGCGCA  
AGGCATGCATGGGCGCAAATGCATCGGCAAGACACCTCTGCAATACTTCACTGG

>CONTIG\_74\_length\_6209\_cov\_6.801381

TACCGCTTGAGCAAGACCGAGCGCGAGCAGTGTTTGTATGGCGAGTGGCTGATCGA  
TACGAAGCGGAACGGGCCTAATGGCATCACCGCTCAGGAGCCGGAAGCCATTGAGC  
GCAAGTATGGTGCGGCCTTCGATGCAAGGGGCGCAGCGCTTCCGTAGCATCCAGCGTT  
TTGCCGTTTCGCCCCAACATCGTGGACCAACCGTCCTATGACAGGCAACGCGGCGTCT  
TGGACATCTACGTGCCGATTTCCTTGGATCACCGGATTCCAGGTAGAGGGCATCACGG  
GCGAGGGGTTTGTCCCGACCAATGCCCGCAGTGAGCGATCTGTTTGGACACCCCAGC  
ATGCCGGGCACTTTTCATCTTCCGATCCGCATGAGTGAAAGCGAGGCCACCGGATTGT  
TCAAGCAGGGCAGGGACGCCAGGGACGATCTGGTGGTCTTCACCGTCAAGCGGGTC  
TGGTTGGAGAACGGAGGGCCCGCGCGCCGAGGTGGACGTCGAACGCGTCCAGGTGGG  
TTACCGAAACGAAGTCATCGGCGTGGACCTGACCAAAACAGAAGAACGGAGAGTCTT  
GATGCGGACCATTCAACGTGTTTGGATTTTCGGCGTGCTTCTTGGCGTTGGGCTTGTCG  
GCCTGTGGTGCAAAGCATGCGCCGAGCAGGGAGGACGCTGTCAAAGCAGTAGAGCA  
ATTCTTTACTGAGCAGGGGAGGCAGGCAACGCTTCAGCGGACTTGGCGGTTTCAAG  
TCAAGGAAGCGAGCGGGCTGGAGATCGCCTGCACAAAACCTGCCAACGGTAACCAG  
GACTGCCGGGTCTCCGGGACCGTCGATGGACTGGGCTTCATTGGCGATCAGCCACG  
ACGCCGAAGGCCAAGGAAATGCGCTTAAAGATGACGATGAAGTTCGGGCCGGCGGG  
CGAACGTTGGGAACTGGTCGACGTGACCGATAACGGAACATCTGCGGGCTGACCCT  
CGACCAACCAGTTGCCATGCAGTTGCCGTGACGCCGTTTGGTCTTGCTTTTAACAGA  
GGAAAAGAAATGAACCACCAAGCGAACTACCCGCGGCTTTATGCGCCGACCGGGCC  
GGCTGCCATGATCCTGCCCTGCGTTATTCTCGGGCCTTTGGGCATGCTGTTGTTTGA  
GCAGGCCTCGACGCATTTTTCAAACCCCAACAGCTGATGGGCTTGGTCTACTGCGCA  
GGTGGGCTGCTTATCGCCGGCTTCCTGGCGTTTTGCCTGATGTTGCACATTCGTGCC  
AGCAGGTCTGGGCTTGGCACGTCAGGACCGGCCGCATTCCCTACTTTCGCAAAGGCG  
GGTTTCTGAAAGGGGCGCTCGTGGGCGGCGGATTGGGGCTTGCTATCGTCTTCGGTT  
GTGCCGTGCTTGGCTGGAAGTTCGCGGAACATCGGGTCTACGGTGAACCTCGCTACCG  
CTGCCTTCTACCTCGCGTTTCTGTGGGGACTGCCTGTTATCGTGGTGCCCACTCAT  
CTTTGGCTGGGCGAGGCGAGCATGGGATCGCACGGCCATCCCATCAGTTTGACGTAT  
CAGCTTTTGAGTTCTTCCCAGTGCGCGCTCCAACCTAAAACGGTTTTTCCGCTGAGGC  
TCTTGCTGTGGCGTGAAGCGCTTATGAACTGCTTGCTTGCCAGGTGACGACTTC  
TTTGGACCGGACGTCGGGAAAAGCTCGGTCAAGCTCCGCATCTCGTTCCTCGGCTGG  
AGTCCGCTGAAGAACCCTGTCCTCCTTGAGCGCAAGTTCAACGGCGGCCAAGTGGG  
CCCTAGCTCGTGCGATGTCTGCACGGAACCTGTTGGGATTGTTGCCCCGAGTAGTTCT  
CTTCCCTCGCTCTTAGAAGGGACAGGGCTTCAACTGCGTTGGCGTGATCTTCTAGGG  
TGAGCTATTACCTGGCATACTGGGCGCTCTTCGGAGGGGCGCCTCTAACGTAAA  
TCTTCCTTAGTGATCGCGCCAGTTCACGCCTAGATCTATGGGCAAGGCGTAAGCACT

GGGACTGATGAACAAACGACTACATTTTTTGTCTCCCCTAGTCAATGCGACGTAGAGA  
TGTTGTGCCGTCATGGTTTCCGGCTCCAATAGAACTGCGACGTCAGCTTCCAGCCCTT  
TAAGTAGCAATGTGCTACCAACAGCGCGTCTAGCCATCGGGGAGCGGGCATGGCGA  
TTTCGCTCGCGTGCCTGCTGGGTGGCGGCCAAAAATGCTTTTTTCGCCGCGCGCTGCC  
GATTCCATGGCAGACCTACAGCAGTGGATGAGCTCCGGACGATACACCCGAGTGTC  
TGGGTGGTTCGCGAGCGCGTTTAAGAGTTCCAGCGCTCGTTTCCAAGAGCGATCGCT  
TTCAAACGCTACAGCGGCCCCCTCGGGGATCGTGGGTGGATTCTCGCCCTGTTGGC  
TCGCAGGCTTTCCACGCGGGCTAGTAGTGTAGTTGCGCCAACCCCAGTCATCATTTT  
AGCACTGAACTGCACGAGATCTTGACGCGCCGTTGCGTTCTGAAGATCAAAACGGC  
GGGCAAAGGCCGTCAGTTCAGGTAGGTCCACTCGTTCAACGACCACCGCACCTGGT  
GTCTGACTAGTCAGGTTCGTAAACGCCCTCTCACGTTCTTGAGTCGCCAATGACAAGC  
ACCGTTCCTTGTCCGGGCGCGTTAGTCCGCGCAGCAGTTCGTCGTTTCGACGGCCTCG  
TTGCCGGCTGTAAGTGCCACCCAAGTGAGCTGGCTTGGTGGGTCCGCAGGTTCGATT  
ACCTGTCCAGCTTCAAGGGTAGCCCGAGCTTGTAATAGCCATTGCCCAAGTGCCTCT  
GTGCCCCGATTTTCGCCAGCGCCAAGGTGTGCCTAGTGCTCCAGATGAGGGGAAAGA  
CCCCTGAACATCAGTTTGCCAGTTCACTAAGCGGTTGTTCGCCGAAGCCGAAGATGGC  
CTGCATGGGGTCACCTAAGACACATGTTCGGCAACATAGATGCCAGTGCACACACCA  
GAGCGTGTGGACGGTGTTGCAATCCTGGTATTCGTCCACCCATAAACGGTCATAGG  
TCGCAGTGACCGCTTGGAAGAGGTGTCCCGCTGTCAGCAGGCTAAGAGCAGCTTGC  
CGGATAGCTGGATAGTCCGTGGCGGGGTTGCTCAGTTCAGCAGGTTCAGCGGGGTG  
GCCGCTGCGAGAAGGGAACCTTGTTCGATAAGTCGAATGGCAAATCCATCGATTGTTG  
ACAGCCGATACGCCGCACCGGGAGTGTTTCGCCTTTTTTGAGGCGGGGCGCGCAGGGCG  
GCAACGCCCGCATTTGGTATGCGTCAGAATCAGGACCGGCTTGCCAAGTGGCTTCCCA  
GCCAAAGACCTGGTGATTAGCTCCGTCTTGCCGCAGCCCGCCGGGGCGGTGATAGA  
ACCACGCTGGATAGAGAGAAGGTTCGATCTCAGGTGGCACGCATGAATCTCCATAGC  
TGATCGATCACCGATTTGAATTCAACTTCTGCAGCTGCGTAACCATGAGAAACGATG  
TTTACGACAATGTCTTGGTAGGCAGTCAGCGATTTGAACCATCCGCTTCCGCGAATC  
CGTGAGGCGGTTCTTAAACCTCTCGCGTTTCAGTCGAATAGTCTGTTGCCGGTCTCT  
GTGCCTCAATGGTGGCAAGCGTCCATCGATTGTTGGATCTGGTCTTGATGTGCTGAT  
TCATCAGTTCTTCTCCAACCAGCTCTTTGGCCTTGGTTAGGAGTGCATCAATGGATGT  
AGCAGGCAGGCATCGGAATAGCTCATCCTCCAAGGTCATGTTTCGCTCGCCATGTGGC  
GAGCTCTCCGAGAGTCGATGCATAAGCTTCCGCTACGCCAGCTTTGGCATCCTTGTC  
CGCATCAATGAAGACAAGGGCCCCGGTAGCCAGCGCTATTAACGCTGTCGCGCGGA  
CAAACGCGCTGTCCGGGCTGCCGCCGCCAGCGTTGACGTAGGAGCCTCCAAGCGCC  
AGAAACGAGGTCTCACCACTTTCCACGCCCCATAGATCCAGCCCCCGGATGAAACC  
CACTTCGCTTGCTCCTTCGCAGACGATGACCGACTTGGCCAAAAAGGCTTCCGGGTC  
GGCCCTGAGCGTGCTTTGGATTTTCGTCAGACGTGCCTGCGACGGTGATGGAGTGAAA  
GCCGAAATGCCGACGTGTGACAAATAGCTGATGCCCGGACAGCTCGCGCAAGGCAA  
CGGGCGAATGGGTTCGTCAAGAAGGCTTGGACCGGTGGGGTAGCTTCTTTGGCTCCCA  
GCGAATCCAGCAGCCGCATCAGCCGATGAGGCTCCAAGCCGTATTCCACTTCGTCTGA

CAAGCACGATTGGGGCCGCGTAGCTGCCGCACGCTGGAGGCCAGCGACCAGAAGA  
CGGGAGGAACCTGTCCCAAGGGATCTCAGCGGAATGCCCTGCTGGTCATGCAGTGC  
GATTGCGCCTTCGCCCCAAGGATACTGCGTGAGCGTCCAACAGCGCTTGAGGAGCAG  
CTCCGACCGATACGCCCAGGTTTTGAGCGGTGGTCTGCACAACGCCCAGGGTCTTG  
CCAGGTGTGGGGTGGCGGTAGTGCCAAAGCTGCTGCGAGCGTCGCGGCCCGCGGCG  
GCCAGCTGGGCTCCCAGCTCAGCTCTCTCTTCCGTCAATCGATTCAGAACTGATCCA  
CGGCTCCAAGACAGGTTGGACGCGGCAAACCTGGCCTATTCGCGCCGGAGCAATGGC  
TGCACGTTCTTCCAAGGTAGGCTTCGCTCAAGGCCGTCCCGCGTAGCGCGTTCTGA  
GAACAACGTCCAAGAGGGCTCAAGGTCCGCATTGACGATTAGTTGTAGCGTAAGGA  
CCGTCTCCCATCCAGCCTTCGGTTCATCCTCGATGGTTCCAGTCGTTGCGTCAAAACC  
TCTCAGAAAATCTCCGTAGAAGTCGAGGTCCATGAGCGAGGAGGGCAACGCCCCCA  
GCGTAATGCGGATACACAGCGGAACGGTGACGTTGAGGGCGTGAAAGTCTGCGTCG  
CCGAAGGTCACCGAGCGCCGTGCTCCCAGGCAGAGATCAATGGCGTCCAGTATCGT  
GGACTTTCCGCTATCGCCGGGGCCAATAAGACAGTTAACTCCTGCGGACGGAAACC  
AGTCCAAGGATTGAATGGAGCGGAAGTTGCGAATAGCAATGTGCCGGATACGAGAC  
ATGCGCTATTTCCCATGATTTTGCTAACAACCTCAGTTGGCGCGATACTCTGACGGCG  
ACACCATTTCGCGAAATGATGACCGTCGAGCGTAACGGCCAACTGACTCAAAGGAT  
GGTCATGCAGTGAAATGCTCGACTGCCTCTTTGACAGCTTCCAAGATGGACGCTATG  
CCCGGTATCGAGGCACCTACGATGGCGATCAAACCTGGTAAAGAGGATCTTCAGAAG  
ATTTAATCCTCGCTTCGAGTCTCGCCGGAGATCTCTTGCTCTGCGCGTCAAGTGATCG  
GCTTGACTATTGTCTCCGTTTCCGGGTCGCCATCGCCCAAGAAGTCCCTCCAGAACA  
CTCCTGATGACCCCAGTCTCCGACTTTGCGGAGACTGATTCCCGTCTTCCAGTCCGAAT  
CTTTTGCCGAATTCGTGTCGAGGGCAGCCTCGAGCCGCTCGATCCTTTTCATGGTCCG  
CAAGTTCTTGAAAGGCTTCGTCCTGCCATACGTGGACCTGGCTAAAGGCTGCCCTCA  
TTGGGTCGTCCTTGAGAAGGTATCCACATATGCTGTGTGCCGCTCCCAGGGCGGCTC  
TGAGGTCGTTGCTAAAAGCTGTCATATCGATCCTTGAAGACGTTGAATAAGCTTGGG  
TGTGTGCTCTGGGCAAACCTCCGGGTTGATGGCATTGGATGATGAAGGGCCGAATGTA  
TCATCGCCCTACGTAGAAAACATACCCCAATGGTCCAGCTGTATGTGCTGAGATTTC  
GGGCTAAAGGTTTTGATGGCCGAGCCGATAACGCGCCCTGGGGGCATTATCGGCCTC  
AATCAGTCGGAGCAAAGGAAATGCGTAAACCTCTATTTTTGGCAACGGACTGGGA  
ATGGCGCTTGACCCTGGGCTGTTTAGCTTGGATGACGCCATCGGTCGTGCTTGGGAC  
GGAGAGGGGATCTTCGACCAAGAAACGCGCGCGCTTGTGAGATGCTGCCTGGTTGA  
TGATGGAGACACCGAGCGTCCTCACGGCGAGGATGACTTGGACGCTCTTCAGTTGGT  
GGTCTCGTCCTGTGACTTCCTGGATCGTATGAGCCGAGGCGGCGCTCACTGGCTCAG  
TCAACATGGGCAGCGCTTCCCTGCGGC

>CONTIG\_75\_length\_6033\_cov\_25.067050

CACCGAAATCCAATCGGGTCGAGCCTTGGGAATACAACCGGGAGATGTACAAGCGG  
CGCAACGAAGTAGAGAGACTGTTCCGTCGCTTGAAAGGCTACCGCCGGATTTTCTCG  
CGCTTCGAGAAGCTAGATGTCATGTTCTTGGATTCCCTCAGCTTCGTCCTAGTCGTTG

ATGGGCTTCGGATGTGTTAACAGGCCCTAATTGGCGTTTTTCGTAGACAGACGCTCAA  
GGCAATACCGCAGGCTGTCATCGATGCGGGGGGGAATTGTTAGATTTGCCGACTGAT  
GTCGTGTTGCGCGAGAACAGATACACAATAAACCGTGTTGTTGCAGTCGTCCTAGGC  
GGTTATGTCCGGGCCTGCTCCACAGAGGATTATGGCTCGCCACGCCGTCAGACGAG  
GACCACTTCATCCGCACCGAACCACCCTTTGCGGATGACCTCGTCACGGACGGTTCC  
AGGATTCTGGGCGTAAACCATGAGGGCTAGGCTATGCTCCGCCCCGGCTGCAGGTCA  
CGTATAGAAGGCGACGTGTTTGGGCGCGCTGGGAATCGCCCCCACCTACTTCCTTCT  
CGGCATCTTTATCGGCGACCTTGACACCAAGGATCTTGTCATAACTGAACGTGAATC  
CGTTCGCTTCGTGCTCACTGATGACAACCAGCACCCGCGGAAACTCGAGTCCCTTCA  
CCCCCTGATGCGTATCGAATGCGGATAGTCCCCTCGCATAAAGGGCCATGGCGCGA  
ACCTGAGAGAAGGGCGCTTGCAGCACTCTGCGCCAGGCATGCAATTCTTGCGCTGG  
GCGTTCGCCTTCAAGGGCCACTTCGTGCTCAGGCTCCTGTGCGTTAAGGGCATGGCG  
CAGTGCATTTCGGCACGGTCAGTAGCCCGCTCTCATGCAGTCCGCTGATGACCTCGCG  
CAGTGGAGGATCGCGATCACGCAGTTGCTCAGTCAAGCGTCGTGCACCGTCACCTGC  
AGCTCGAATCGCTTCCAACCTGGTCGGCGCGTCCGGCAAGCACCTTACTGTCAAAAAG  
GGGGGAGCGTGTCCGGATGCTGTCAACCAGTGTGAACTCATCGCCTGAGAGGCCCG  
CTTCCACAATGGGCAGCACATCGTCCACAAGAAAAGTGACGGGGCCCTAATACACCG  
TCCAGGAGTGGTGTCTTCAGTGTATCGGTCTCATACAACGGCCCCGAAGACTTCATCG  
AATCCAAGCCGCCGCGATGCCATGCGATGTTCAAGAACGAGTGTCTTGCGTTGTTCC  
GGTCCGAGCCCCCACTCGGCAACGCCGGTAATCTCAGCCATCTTGACGCTACCGCC  
TCCTCAAGCTCAAGCGACTTTGCTGCACCAATGCCGGTGATGAAGATCCTCGCGAAT  
CCACCAGGCTTGTCTTGCGGGCTCGTTGCTGCTGTCCATCGACCTCCGAGCGGATC  
GTGTTAACGAGGCGAACAATGCGCTCAGCCGATCGGTGGTTCATCACCTTTGCGGGC  
CGCGCCCAGTCTCCGGGTATCGCACACTCGAGCCGACGCATGCCATGTGTATAGATT  
CTCTGCATCGTGTGCGCCGAGAAGCCCGAGGGCAAACCGGTCGCTTGCGTATGCCTGA  
ATCGAGAGAAGCGCCTTCATCACTTCCTCATGCGTGTCTGACTCTCATCGATGAGA  
ACCACTGGATAAAGGTCGACGAGCACTTCGCGTAGCGGTTCTTTTTGCAGGAATTGCG  
CCGGCCATGCCGATGACTTCCTGGTGGGTCAGGGACCCCCGACGCTTCGGTTCCC  
GATGGGCTGTAATGGAATGACAGCATCGAATCGAGCGATTCTAAACGCTTTCTCTTT  
CGCTCCAAGTCGGCCTTGTTCTTGAGATATGTCTTGTTGCTCCGCGTGCACGCCCCA  
TTGCATCTGTAAGTTTCGCCATCGATTGCTCGAGGGAAACCTTCAGCCATGTCCTGA  
TCTCATCGTCGAACCCCTTAATGAGTCGCCAGGCAAACTATGGATAGTCGACACAT  
CGATCAGGGCATCAAATTCGATTCGCCGGAGAATCTCGTCCCGAGCAGCATTTGTGT  
AGGTGATGACCGCGATGCGTTGCCCCTTGTACACGAGCCGCTCGCGTTCGCGTAGCC  
GGAGTTTGCCCAGCGCGCCAACAAGGGATCGCGTCTTACCGGAGCCAGCTCCGGCG  
TACATGAAGAAGCTCTGCGGGGTATCCAGATGTAAACACTGGTCAATGACTTCGTGCG  
ACCCCGTTGTCAACCAAGCTATCGGTTAGCTCATTCATGCACACCTCCTCTACGGA  
AACGGACACAAGAAGCATTTCTGTGCTTTTTCTTGACGATTGCTCCTGCAGCCACGA  
GAGGCCCTCCTCGATGTAGTGCGGAGGAATCAGGTCTTAAAGTCCGTGTCATAAAG  
GACGCCGAGTGCGAACCAGCCTTGTCTCCATCACCTATGACCTTGAACAGTCCAGA

GGCGAGGGCCTCCCCGCTCGTTGCCTTTGCAATCTCACGCGCCACCGCTCCAATCAT  
CCCGTTGCCCCTTGCGGCAGCAAAATGGGCAAAGTTGGCGAAGACCAACGCGTCTT  
CGAACGTTCTTGGAACACCTCTTCCGGCGAAGCCCCGACAGGGACTGCTACGTAG  
GCCGGGGTCTGGTAGGCCATGCGGATGGAGTAGAGATCGTCGGAAACGATGACTTT  
ATCAGTCGCGGCCAAATCAAGTAGAAAATCAATCTCACGTTTGTGTTGTTTGA  
CAGCCAGCTTCGCAGTGTTGGGTTTCCAGTGACCTGCCCTGCATTGCGCTTGACTGG  
CACGGATGCCTTGTCGCCCAGCGCGTCGATGTCGGTAATGACGAGGCCAGGGATTC  
CCAGAGCGTTGAGCAATGGCCGCAAGCGGTGGGCGTGGCTGCCACCCACCTCGAGC  
AGTGTACGTACGCCTGGTGAAGCTGCGGGAATCGGTTGCGAATGAAGTGCGGAAG  
CAGTATTCGCTCGGCGGCGCCCTCAACAAGTATCAACGCGTCCGCGAAGAACACGT  
CCGCATGCTGTGAGCGAAGGTAGCGAGTGACAAACCGTTTAGTGCTGGTGTATCCC  
CGAAAACGGCCTCAAGGTTTCGATACAGTCGATATCGGCACCTGTTTCCCATGCATTC  
CTGCCGGAAGGCGCCTGAAGTACCGGAGTGACGCATACGGAAGTTCGTGGGCGATG  
TGGCTCGAGTGCGAGCTCACTACCATCTGCGTCGAGAGGCCGGGGAATTTCTCAAC  
AACGGATCATTGATAAGCACATGATAGGCGTGGCGGACGAATACTTGTTGCACCTG  
GGCGTGGAGGTGCGCCTCTGGCTCCTCAATCATGACGAGGTGGATTGGCTCGACGAT  
CAAATCGCCGGATGCGAGCGCGGCCTTGCTCTTGCGCAGCCAGGCATCCCTGAAACT  
CATCAAGCGAAAAATCATTGAGATCAGGTTTTGGTATCCGAGTCCGTTAGAGGTCTC  
CGGAAGCCGAAGCGGTGGGGTACCGGTGCGGCCGCCAATGGAATCGAGTTCAAAGA  
GCACAGCCGATTCATGGTTAATTCCGTCGGCCGCACTCAGCTGCGTCGTCACATGTA  
TCGTGCGGTCGTTGGCCCCGGATATCCCAGCGATTCAACTTCCTGGAACGCCGGTT  
TAAAGCTCGCGGCGAGCCGGACATCGAACGCGTCGCGAGCCGCGTCCATCGCCCCG  
AGGGCGTCAATGTCGGAAGGGCCTGGCGACTGCTCCGGGTCAAGATGCCGCTTGTA  
ATACGCTCGGAGCTGCTCGGAAAGCCGTCGTCCTGATCGCCCTGCCGAGGCCGAATC  
CTCGCTTTCGTCCAGTTCGCCGAATCCACGCTGCGCATTGATTTTCGTGAACCCGTATC  
AGGCCGGCCAGTGGGTGTTGCTGTCATCGGGATGGTAGATGGTCCGAGGTGCTGGGG  
CAGTGCCTCCCGGGTCACTGTGTCCGGCTCGACGAGCCTCGCCGGATCGAGGCGGTA  
CCAGCGCATTTGAAATGCACTCCAAGCCTCCTGGTGAGGAAATCGGTAAGGTTCTT  
CGGCCAGAGCGTCAACGCCGCCTTGTC AACATCTTTGGCCGCCTCTGCCTCCAGCGC  
ATGAACCCGTTTCGCGTTCCGACCGGAAATCGTTGTAGAGCGCGACAATGTCCTTCGG  
CTCAAGCCGGAACCGCACACCGACAAGCCCACTACGCCAACTGAAGGATGGAATAA  
GGTCCTTGACGAAGTGGAGTTCACCGTTTTCTGCAGACAGCCATAGGTCAAGCATCG  
GGACCATAGCCATCCACGGATCAACCACCGGTGGTTGACTCCCCGCGAGGGCGGCT  
TCCCATTCCTTTCTATCGCATCAATCGTGGGGAAGTGGCAAAGAGTGAAATCGAGC  
AGCCTAAACGTGCTCTTGTGTGAGACAAGAAAGCGGCGCAGCGCAAGCATTGCGGA  
GGACTTTCCGCTGTTGTTGGCTCCAACGAGAAGGGTCGTGTCGTCCGTGAGGTGAC  
GCGAACCGCTTGAGCTTGCGAAAATTAGCAATTTTCGATATGTCGAATTTTCATTAT  
TTCTTCCCTGAGTTCCTAGATCCGTTTCGCACATTCTTGCGCATGACCCTGACCACAA  
CGCAAGCTCTGGCGAAAGATTGAACCTTGCCCTCGACCTTGCCAACCATTTGAGGAA  
TTCCGAGCGGCACCTTCTGCATTTGACGTGGGCACAATCTGCGAGGACGCAAATTC

CTGTGGTGCGCCGATGCGACCAAGCGTGCAATTGCCGATATCGGTAGACAACCTGCCT  
GCTTGAAGTGTAGCACTACGAGGGCCGGTCGGGGTTAGCGCACATTGCCGAGGCG  
CGCGCCGCTGAGCCGACTGGAAAGACAGCGCCGAAGCCCTCTACTCACAGCACCGA  
AGAATGTGTTTCAAGCTGCGGTGCACCTGCGCCTCGCGGTAGCTCCTGGAAAATGCG  
TTGGTCTAGTCCGCTTCGGGTAGATCACTGCCGTTTAAGGCAGGCCTACCGATCTCG  
GGCATATCGTTTCTTAACAACCCAGGTATTGCCCCGCAACCAGAGAATCCTTTTTTATC  
AAAAAATTGCGCTCACCGCCTGCGGCCCAACCGCCTTGTGACAGGGTGTAACATTTT  
TAAAGGGCACCCAAGATCGATTCTTCATAGGGCGCATGCTAGACCTATGCTTCACAG  
GCAGGCCGCCCCTTGCCATAGAATCCCTGGGACCAAGGAATCAGCTGCGATCCGC  
GGCACAACCGTCCACGATGGAGATCACCATGACCGACCAGGCAGCAATTCCCGTCA  
CCGTGCGGAGCGACTCCCGCTTGGGGGAATTTTTTGTCTCCGGCCAAGCTTCCGGG  
GCAACGGTCAGAGCGCTGGCTTGAAGATCGCCAACGAAGAACTGCTTCTGCCCCCT  
CGCATGAACACCATGGATCCGCCCAATGGTGATCCAAGCCAGTATTCGGTGAGGCC  
GCACCTAGTGCAGGTGGCCGGACAGCAAGAGATGCCGCGTGATTTTCGAGAAGCTGG  
CGGGCATCTGGATCGTTTCGGAAGCATTGAAGCAGGTGTTTCGACGCCGTCGATCCGG  
AGGGCTTCGCCTTTGCGGCCTGCGACTTCACCCTTGCCGACGGCACGCAGGGTCCTC  
AGTACTACCTCTGCAGCGTGACGCGTTGGCTTGATGCGCTTGATGAGGGTGAATCGC  
GGGTCCAGATCGAGATCGAACACGATTACGAGACCGGAGAGGACCTCAACTTCTAC  
AGCGTGTCCGGCGGTGCAAGCCTCGTATTCAAGCGGGAAATCGTTGGTAACGCTCAC  
ATCTTCCGTCAATCACGCCTAGGAACCGAGGCCATTTGTGACCGCGTTCTGTTCGAT  
GCTTTGAGCGCAGCCCAACTTAGCGGCCCTCGCTGCGAGACGCCGCAGACCTCTGA  
CGCGCCAAACCCTCGATACGGATTTCTGAGCGGGAGTTGCACCGATGGCTGACACA  
CCGGCTTTCCAAGGGCATCATGTCATTGAGCAAGCGGCTTTCAGTGAGAGCCGATTG  
CTGCAGTCGCTTTCAGAA

>CONTIG\_76\_length\_6003\_cov\_52.644826

GCGCGCATCGCCTCTGGACCGGACGCCCCGACAAGCGACAACATCACATCGAACGCG  
CAGTTCCTGGATTTTCGGCGGCTTCCGCGCAGTTCCCAGCTGGAAGCGTGGCACCGAT  
GGGCATCGTCACTTTTTTCGGCGATGAGATGCGTGATGTTTCGCCACTCGCTTCCCTCGC  
TTGCCTATTTTTTCAAGAAGTATTCCCGCTTTGACAAGGCAATCGCCAACATCGATC  
AGCTGCTTATCCAGATCGAGCATCACATGGAAGCTGCGTTTCTCCATCACTGTGCAG  
AAGCGTGTGCTTTGCCTGAGTCAAGCCCAGAGGTGTTCCATTTCAAAGCGATCATTG  
CGCACTACTACCGCGAGCAACAGCGCATTGACTATGCGCTCGATCAGCCCACAAAG  
CACGATGAGCGCCACGATTGGCTCTCCGACCACATCAGAGGCAAAGCAAGCTACGG  
GTCTCCTGTTGGCGAGGAGATCGCGGCGCTCCTGCGCGCACTTCCGAACGCAACTCT  
CCATCTTTGTGCGGCCAACCGCTGGCTGAGACCACGACCACGCCTTTCTATCGCGT  
CTCCAAGCGCCGCGCGATCAAGCTGGTGCCGTCGATCCTGGCCGATCGGTGTCGCGG  
ACCTGAGCGGGTCTCGGCCTTTATCGCAACCGAAGTCGCGGTCTCGCGCCGTGTTTG  
GAAAGGCCTACCGTCGCACTGGCTTGTCTAGGCTACGCAAGCGATCAAGTGTCCAC  
CGCCTTGTATTTCTTTGATACGCACCGCATGGCCTATGCAGTCCAGCTGGCGGGGCC

ACGCGTGCATGGGGGAACACTGTTCTTCGGTGCCCAAGTTGCAGATAAGACACTCG  
GCATCACCAATTCTGGCCGTAGAACCGTCGTGCTTGTGCGACTGCGAACCTAACAGCT  
ACCTGGTAGGTCTAAGTTTGAGCGGGCCTGCATCAATCCCTGCCGCACTGCTCACCT  
TCCCGGACGCTGCAGTTGCAGCGCAGACATCGAGTTCAACCACCGCCCATGCAACCT  
AATGCCGTTGATGCGCAGGCGCTTGGCCTGGCGATGCAACTTCTGTTCAAGACTGAC  
CGCAAGAAGTTCAGTATCGCAGCCGCCTATGTGTGGCTATGGCCTGCGATTCTGTCTA  
GGCCAGCTCGTGACGATCGAAGACGAAGACGGGGTCTGGACCGGCTACGCCTTGTG  
GGCTTATCTGACGCCTGAAACCGCCAGTCATTTGGTTCTGCAAGATCCGCCGTTCTT  
GCCAATTAGCGACTGGAACGAAGGTGATCAACTCTGGATCCTGGACTTCGTGGCTAT  
GCCAGGGCACCACCGACGCCTGGCGAGAGCACTCCGGGACCGCTTGCGCCCTCACT  
TCAAGCAAGCGCATCGCTTGGTGCGAGATAAGACGGGCGCTATGCTGGGAACCAAG  
ACTCACACACTTCGCAAAGATGGCTGAGGAAGGCACGTTGCTTCCTTGATACGAATG  
GACGAACCGAAGCGACAAGGCAGTTGCAGCCTATGCACAAAGTGACATCAAGGCCG  
ACCAAGGCCTGGACTGGATTTTTGTTCTTGGGCTTCGGTTCTGGTTTGCCTTATCCGC  
TGATCGGCAGCACTTTAGGCTATTGGCTCAGCGAAAAGTCGCTTTCGATCGCAGTCA  
TCGGTGCCTTGGCTTGGACCGCGCTTCCCTACTCCCTCAAATTCCTATGGGCCCCGCTA  
TCTCGACCAACGTCGTGCGCCGGTCGTTGGAAGCACGATGTCGCACCGTCAAGGCTG  
GATTGTCTTGTCTTCGATCATGGTCGCCCTCTCTCTCCTGGGCCTTGTCTTGAGCGTC  
GTCTCCGGGAGCCTTCCGCTGATTGCACTGAGCTGCATCGCAGCCGCGTTTGGCGGT  
GCGACCCTGGATGCCTCAGTCGATGCGTTTCGGATCGAACAAGAGGCAGTGCACCA  
GCAGCCAGCCAAGCTCCTCACCGCCTATCAATTTGGCTACCGCGTTGCTCTGCTGCT  
GAGCGACGGACTGGTGTCTTGTCTCGCAGCGCGGCTGTCCTGGCAAGTTGCTTATGC  
ACTTCTGCTGCCCCTGATGTTGGTGCCCATCTGCGGAACGCTCTTTCTGCGATCTCAT  
CCCGATAGCGTTCTCACCCCAGATCGCGCGCGTGCGAAGAAGCAGGGGTCTCCGCT  
GATATCCCTTCGACCCTCCACGCTCCAAGGATGGATCGCGGTCATCGTCTTCATCGG  
CTGCTATCGTCTACCGGATATTCTTCTGGGTCCCATGATCAATCCTTTCTTCTATGCC  
CTTGGCATTGGAAAGAGCGTGGTCGGATCCCTGCATATCTGGCTTGGCATCCCAGCA  
GCCTTCCTCGGAATTTTTGCTGCAGGCACTAGCTTGAAGCGCATGTCCTTGAGCACG  
ACCATCCTTGTTGGAGCAGCTCTCCAAGCCATTGCCCTCCTCGTTCTTGCAATTGCTTT  
CGTCCAACGAGCGGTCTGCTGAACTGCTTTGGGCTAGCGTTATTTTTCAAACCTTG  
CCAGTAGCTATAACCGGCATCGCATTGGTTGCTTATATGTCAAAGCTTGTCACGCTTG  
GACGAGCAGGCGAGCACTATGCTTGGCTAACCAGCTTCTACTCCATCTTCGGCAGGG  
TGCTTGCCGGCTTTTCAGGTCTTGCAGTGGCTTATCTCACCACGCGCTACGGACAAA  
GCCAAGGCTATGGCACTTTCTTCATTGGCATCTGCCTGACGTGCATGCCTGCCCTCCT  
CGTCTACTCGCTCATCATTCGGAACAACCTTGAAGGAGCGACCCGAGCCGTAAGTGCC  
ATCACGTTACTGCCTTGCAATGACTGTCTCCGCTACTTGCGGACATGTAGTGCCTGA  
GCTCATTTATTTACACCAATCCCAATGTCTATCCACCTTAGCGCTAGCCAATTAGAT  
GCCTAATTGGCTAGCGCCGGCAAGCCTCATCAGTTTCGACGTCGTGTAATGCCAAGC  
AAACACTCGCCCTTCAAACCTCGCCTTTATATACACTGACGTTTCACCAAGATTAGTTT  
TATAGAAGATATCCTTACTAACGTTGGCGATTGGCTCATGGGGATTGGAGGCAAGA

CATATGGAGTGAGCGCAAATTTTTGCTTGATCTTAGACACTTCATAACAGCGCCCCGG  
GAGCCAGCTCCATATACATAAAAATTCCTCTTTATCGAGCTCAGGCGGGACCCTGA  
ACTCAATAAAAGAGATCCCATATTGATCCCGCGTCTTGAACGCATTTGAGCGAAAAG  
CAATATTCAAAGCTCGACTTGAACCTCACCTGATGGAAATCACGGATTCCAATCTCGC  
GAAAGGTCTCATAATTTACCGGCTTATCGGGATCATAGATTTTACCAATCACCTCAT  
CCAACTTAGTTCTGAATCTTTATTTTCAGCGTGTGCGCCCGCACTGACCACCAAAA  
ATAGAACCACAAAAAACGCCAAATCAATTTTTATAGACATACTAATTTCCCTCGGGA  
ATTAAAGATCTTTAATAATTCCATCAGCCCGCCGGGGGGTGCTTACTATCCCAGTAA  
CTCCCATAATATTGCTCATAAGTGATGTCATCAGCAGTATTAGTGGGCGTCCCATTT  
ACATCAATTCGCTCGCCATTTCTGAAAGACTCGCCGATTTGCGTTGAAGCGGCATCC  
CAATTTATTTGACCCGCAGTGTAGGCGTCATATGTCGCGTTATAGGAGGCTACATTG  
GCAGGATCTGCTGGGATATTA AAACTTACGCCCTGCGCAGAAAGCTCTCTTTGGACA  
GCGATGGAATAGATTGTTGCTTCACCTTCAGTAGCTAAACCCATATTGATTGCTGAT  
GCTCGATCTTTGACTGTGTTCCATTCTCCATCAAACAAGGTGTGTCCCAACTCGTGTG  
TCAATTGAGCTGCAGTATCGCTCGGGTTAGCATAAGTCTTGATGTATACGGTTCCGC  
CACCCCCATCAGCATAATCGGTACGGGAATAGGTATCCGTAGTCTCTATCTGGAAAC  
CCTTCGATTGTGCCACTTGAACCAACCCTTCCAGGGTTGCTGACTTGTTAACTATGAC  
GTCGACCTCCGCGCCTAGTTCCGTCGTCGATTCTTGTCGGTTGGATTCCGGAAGTCCG  
CCGCCACCAGTGCCGGGAGGCGTGATCGGCCCGGCTGCTCAACTGGCGGTGAAGG  
AGGAATAGTCGGAGGCGGGCTCGTAGGCGGGTTAACCACAATTGGTGGAATCTCAG  
TAGGAGGCTCGCTTGGATCGACGTCCGCAGCGGCCGCTGCACCTGCCACTAGGAAC  
AGCTCTTCGTTTGTCAATTCTCTCATTACAGCGCTCCATCCTGTGAGTAGATTTTTTTC  
CTGATCGTTTTTTTCTATTGAATTTCCATATCTCTTTTTTCTTTTGAACCTATTTTTTTTA  
AGCGTTGTAACCTCCTCACTATTGACTGGACTTCTCAGCCGCTTCCCCGGCCTCGTCCT  
GTTCAAATTTGCTGGGCTGCTCTTTGATCAAGGGCCTTAGGATCCCGCCCCAAAAGA  
GATAGTGCATATCGCACATCCGAGAGATGTTCTTGTCGTGCGTCACGATGACTGTGG  
TCGCGCCAATGCTCCTGATGTTCTTCATCAGCTGTATGCCCATCTGCTCATCAACGCC  
AGTCGTTGGCTCATCCATCAACAACA ACTTGGTGCGCCTGTAGAAAGCCCTAGCGAG  
GAAGATCCGTTGTTTTTGACCACCTGACAGCGTGTTTCCCAAGTCACCGACTCTGGT  
GTTGAAGCCCATTTGGCATGCGCTGAATATCGTCGTGGATACATGCCAATTTTCGCAGC  
CTGCACGAGACGCTCTTGGTCAATGTGCTCATCGAACATGGAGATGTTTTCCGACAG  
CGTTCCCGATAACAGATTGTCTCCCTGCATGACGATGCTGACCTTGCTCCGGTAGCT  
CGACTTACCGACCTTGCGCAGATCCTCTCCATTGACTAAGAAGTCCCGGACTTGAAG  
ATCTTCAAGCCCCGCCAGAACGCGGATGAGTGTGGTCTTACCCACGCCTGAGTTCCC  
GACAATTGCAATCACTTGGCCTGACGGGGCCCTGAGCTGCAAGGCGCTCATGATCC  
ACTTGTCGGTGGACGAGTAGCGGAAGTAGCCGTTAGCAATGGCAATAGCTGGCGCA  
GCATCCTCCAGCGCGCCGTTGCCATGCAGAAACGACTCAGGCTCGCTGTGCGTGATG  
TCTGAAATGCGTTCTGTGTGCAAACGAAGCAGCCGGAGCTGCATCAAGTAGTCGGC  
CAAGTTGATGCTACGTTGGCTGAATTGGGTGCGGTAGATCAAAAAGACCGTTAGCAC  
CCCGAGCGTCATATCCCCACTGAGCACCAACCGGGTGCTTCCCAGATCACAAAGAT

GCGGCACAGGCCTTGGATGAGGAGCTGGACAGAATCGAACCCGATGCGGATCCGCT  
CGGCCCCGATGGTCGCGTTGGTCGCTTTCGCGCTGTAGTTCGTAAAGCGCGACGCC  
AGAGCGCTGACTTGTTGAACAGCTTGATGGGCTGGATGCTTCGGACCGTTTCGTAGA  
GCAAGCTTTGTGCGGCGTGCATCAATGTTGATTTGATCGAGGTTGGCTTCTTTGAGATT  
GGCGTAGTAGGCGTAGCGCGAACCCACATAGGCAATGGTGAAAGCCAACAAGGCG  
AAGGCAAGCGGCGCGTCGTAGCTCATCAAGAGCAACAACATGAGGAAAGACATCA  
CCCCGTCAATGACCGCTTCCAGCATCTTCGTCGTGAGTGACTGCTGGATGGAGTAGA  
TCGACTGGAAGCGGCTTGAAATATCCCCGGTATGCCGTTTCACAAAATACGACTGGG  
GTAGCGACACGAGGTGACGGAACAAGTTGCTGCTCCACCGCAAGCCGGTGGTGGAA  
GAGATCCACAGCAAGGTCCACTTCCTGGCAACGGTCAAGACGAGTTGGACCAAGAG  
CACGATCGAAAAGCCGATCGCCAATGTGGTGACCAGGCCATCGTCCTTGACGCTGA  
GCACCTGATCCATGGTCAGTC

>CONTIG\_77\_length\_5887\_cov\_15.744618

ACTTTTCCCTACCTACACCAGAGGGACAGACCATGAGCCAGGATTATTGCCATCAAA  
CGATCAGGGTTGCCGCCGCTCCAGCAGTGCTGTCACCTGAGCTGGCGAATCTTCTTG  
CGCTTCAGCGAACAGAAGAGCCCCGAAACACCGGTTCTACTAGAGGAAGTCACCCAG  
GACGTGCTCTCAACGGGCGTACTTGGCGGTACTTACGACTTGGGCATAGGCTGGCCT  
GCAGCAATTGATACGCTGGCCGTCCAGCCACTATGGCGCGACCGTCTGGCTCTCGCC  
TTGCCCCCGCGCTCTCCATTACTAGCGCATCAAGCCATTTCAATTAGGTACGGCCCTA  
AGCTACCCACTTATCTGTTGGTACTCGAACGCTTGCGCTGAAGGGTTTTATAACGAG  
GCAGCAACGGATGATTGCGGGGCTCATCTATGCTGTACCTCAGTAACTTCTTTTCGAT  
TTGCTGGCGGTGCTCGTAGCCGCGGGATATGGCATCGGTATCGCGCCGCAGAGTTGC  
ATCATCAATGCCCCGTAATCGGGGTATCGTAATGCGTCCGATCCTCGGCACTCCGCAA  
TGGTCCTACACCTGTCTTTTTTCGGCCGGCAGATGCTCTCTCGCCTGCAACTGAAAGGT  
TTGTCGAGCGCGCGTCTCGGATAGCAATATCCACTGAAAGCAAATGCTCTCGGCGAA  
AATAGCTGAAGTGAGATAAAGCGTTTACGTCCGGGATTACATCGGGATATTGGCA  
ACGCTGCTACAAAGACGGCACAGTTGTTTCGTTGCCGTGCTTCCTGCTCCGGGATCTG  
GTGTGAAGGTTGCTGTTGCGCGCGCTCCTGTGCCGATCCACTGCTCTGCAGTGTTTGC  
ACCTTTTTCGAATGAGTGCTCAACTGGGGTCTGTATCGCTTCCTTAGTCGGCATGTAA  
GCACGCAGTGCTGCAGGATTGTCTGAAGCGCCCTGCAGAATGAAGATTTTTTCGCCA  
GCCGCTGCGGCATTGGTCTGCTTGCTCAGTGCAATTCGTCAACACTACTGAAATTG  
TTTTGCTTAGCGAGCGCGTAAACACTGGCGCTGATGCGGTCAGTGCTCTGCAGCTTGC  
AAATAGCCGGAACCGTTTAGTCCTTCGATCTTCTTGCGTATCTGCTGCATCAAAGCG  
TGATCCGGATGACCCTGGTGTGTTGGATCGTTAGCCGGGTTGCGCTCTGGCTCACGG  
TTCTGGTCTGGTTGCTCGCGGTAGCGCAGTTCCTCTATACGTTCTCTGACAGCATAC  
GGTTGCCAAGGCCCGGCTCGATACTGCCAGGGAAATCCTCCACCGGTAAACTCATC  
AATTGCCAAAGGTGCGGAAGGCGGAATTGCTGTTGACGGTGTCACCAAAGACCTT  
GAAACCATAGTCGGGATAGTGCAAGTCCAGCGCGTTGAGCTCCGGCATCGCTTTGAC  
TGCGGTGTTCCAACGCGCAAGGATCTCATCCTTGTCACCTATGGCAATGGTGTTTGA

TTGCTGGCTGTCATCAATGTAGCTGGTTGAAGTGACTTTGACGCCCCTGAAGCTGC  
ATAGGCTGCATCATGCGGGAAGTGCCACGCACGCAGCGAATGCTTGGTTTCATCGGT  
ACCTACCAACAGTGCTGTGCCGGTCTCTCGATCAGTAGCTAGACCATGCAACTCGGC  
CAGAGCTTTACCCTGCTCGTCGCGTAAAACCCAAAAATCGTGTCCAGCGACACCGA  
GAATTTTGAATGATCTTGCTTCAATTGTATAACTGGGCATGCTCTTTACAGTCCATAA  
GTGCAGGGGTTACTGCTGCTGACTAGCGACGCATGAGCCTAGCAAGGTCTTGAAGTC  
GTTCAATTGCCCTTGCTACGCCCAAGTCGAAAAAATAGGCACCACCACCTTTGAGTGT  
GATTTTTGCTTGACTTGAACCTTGC GGACGTTCTATCCGCATGCGAAAGCCGGCTAG  
GTTTTTTTCTCAAAGCGCCCGGATTCAAGCACTCCATTGATGCTGTCCTTTCGCGTG  
ACTTCGCTCCAAGAACTATCGGTTGCGGAAAGTTTGCTGATGCTGAGTTCGGCGCAA  
TCAAACAGACGTTGGTTCGGCAGTTCGCGAGGAATTATCAAGTGATCGGAAGCTGTT  
GGGACTTTCCCGGTGGCTAAGAATGCGTTGCATCCTCCCAATGAGATTAGCAAGCCA  
ATGACAGTGAAAACCTTCAACCAAGGTTTCATTTTGGCTCTCCTGATAAGCGCGTAG  
CGGGTCACACTTTGACAATGCTGCGAGAGTGACGAAACACCAGTGTAAGTGGAACA  
GTGAGGCTTGTCGGTTCGACTAATTACAAGAGGAACGGTGGGCCTCGCTCTTAGCCG  
CGACTTTTGGAACGCGTTTCGCCTTGTGATAGGCATTTATGCCCGCCTCAAAATTCA  
GACGTGGACTCAGCGATCCTGTTTATAGCTAGAGACGCACGAGTCTAGCAAGGTCAT  
GAGGTTGTTTCATCGCCTGTTTTACCCCTAGGTCAATAAAGTAAGGACCACCACCTCT  
AAGTGTTATATCCGCCTGCTTCGCCTTTTGTGCACGTTTCGATGCGCATAACGGAAACC  
AGTGCGGTTCTTATCGTCAAAGGTCCCGGATTCAAGCACACCATTGATGCTGTCCTT  
ACGCGTGATTTCTCTCCAAGAACTATCGGTTGCGGAGAGTTGGCTGATGCTGAGTTC  
GGCGCAGTCAAATAGACGTTGGTTCGGAAGATCACGAGGTATCGCCAAGTGATCGG  
AAGCTGTTGGGATCTTCCCGGTGGCTAGGAACGCGTTGCATCCACCCAGCGAGGAG  
ATCGCCAAGCTAATGATAGTGAAAACCTTCAGCCGAGGTTTCATGTGGCTCTCCTGA  
TAAGCGCGTAACGCATCACACTTCGACGATGCTGCGAGAGTGACGGAACACCAGTG  
TAAGTGGAACAGTAAGGCTTGTGCGTTTGACCACCCATTAGAGAAGCACTTTGGGCC  
TCGTCCTTAGACATGACTTTTGAAGCCCCATTCGCCTTGCTCGGCCTTCATACCCGCC  
TCAA AATTCAGACATGCATTCGGCAATCCTGTTTATGGGGACTCGCTTCTCAACGAT  
TGGCGTCGCTGCTTCAGATACGGCCCGCAAACCGCCTCAACCATCGCTTGCTGATT  
GTCCGAGGTGAGCGCCTCAATAGGCGATTTGTCATCAAGTTCCTCGCGAGGTGCGGT  
CAAGGCGTAGTAGATATCCCATGTATCAACGCTACGGTGCAGGCGCTTGAGTACCGC  
CTGCACCAAGCGGCGCTTGAACATGTTGAGTTGCCACACCGGTACCCGCTGCCCCTT  
GTTGCCCAACTGAATTGAAAGCAGGTTGCGGGCCTGGATCTCGTAAGTAATCCACCG  
CCGCGATTTGCCCGCGAGCTTGGCATAGTCCGCGACGACCAGGTTGTCGGGGCCCTTC  
AAAAATGTCCAGTACCTCCAATCGCTCTCGCTGGACCTCAGAGATCTTCGGTAGAGC  
GTATTCAGGCATTTGCACTGCAGAGAGCCGCTGAGTCCCGGCGCCGACTGCTGGCAT  
CGTTTGCTCATTGGGTGCTACCAGCATGATGGGAGCGTGTTGGCCCAACGCCGGCAG  
CGGCGTGACCTTCTGACCGGCAATCGTAGGAACGCCCTGAAGGTGGATGGTGAGGT  
GCGTGCTGGCAATCTGAACCTGATTTTGCTCGAACAGATCCAGCCGATCAGCCCAGT  
CCTGCATCATTAGCCGACGCTGTTCAACGTACTCGGCATGGTTGTAGGTGGCGCTGA

TGCGATTGGGGTCAGCATGTGAGAGTTGCGCGTCGACCCAGACCTTGGGGTAACCC  
AGCTCATTGAGGGCGGTTCGAAATCGTCGCCCTGATGCCGTGACCGGTGAGACGACC  
GTCATAGCCCAGCCGCTTGATCGCACGGTTGACCGTGTTTTTCGCTCATGCGGGCAGT  
GATTTCGCTTCACGCCCCGGGAAAAGGTAGGTCTGCGCTGGTTTGAACAGGTCGAGCAT  
GTGCCGCACGATCTCGATGGCCTGCACAGGCAGTGGCACGATGTAGGGCGGGATGT  
CAGTTACGCGCTTTTCGCTTCTTCTTGGTCAGCATCTTGCCTGCTTGAGCGACATCAC  
AGGGATGATCCACAAACCTTGTTCCAGATCGAACTGGTCCGGCGTGGCCAGACGTA  
GTTTCGCCTGTGCGTACACCCGTCAGCAGCAACAGTCGAATGGCCAATTGGGTCATCT  
GCATGCCGCGGTACTTGCGCAGTGTCTGCAGAAACAGTGGGAGCTCAGGCATACGC  
AGGAACGGGTTGTGCTCAACGGGCGGCAACGGCACAGCGACCACGTGTAGATCGAT  
GGCGGGGTGCTCGACCATGCCCCGGAATGACCACCATGGCGTAGTCGGCGAGTTGCT  
TGAGCCAGGTGCGGACCTTTTCGGCGACGGACAGTGACTCTCGTTTCTCGATGCGTC  
CGATCACCTCCAGTAGCACCGGACGGGTGATCTCGTAGATGGTGTAGCGCTTGAGGT  
GAGGGAATACATCTTTTTTGAACACGCGGCGGATCTGTTCCAGCGAACTCTGACGAC  
CTTCTTCGAGGGTCAGTTGCCGGTGTTCCATCCACTTTTCGTAGACCGCCATGAAGGT  
GTTTTTCGCCAGCCAACCGGATGGCCTGGCGTTTTTGTCTTCGGTCTGTGCGTGGGTTG  
ATGCCCTTGCGGACGAGCGCCCGGGCCTGGTCACGAAATTCACGAGCCTCCCGCAG  
AGACAGTTCGGGATAGCTGCCAAGCGAAATCCGGGCGCGTTGTCCAACCCAGGTGT  
AGCGGAAGTGCCAGGCTTTGCCGCCAACAGGGGAGACGTAGAGGAACAAACCGTC  
GAAGTCTGCGAGGGTGTAGGGCTTGTCCGAAGCCTTGCTTGCCGGACGACCATATC  
TGTGAGCATGCGTACCAACTCCTGATGCTGCGAGTTGGATGCGATGTTTGTCTCAG  
GTGGCCTGCTCTTCCAGCAACAATGCGGAACGGGTGTTACCGCATTTTGTACCGCA  
AAACGTACCGATTTGTACCGGTAGTCAGTGGATTTTCGCTGGACGTCACTGGACTGAA  
GAAGAGGGGTAATTCAGAACCAGATCAGTCACTTACAACGTTTCCTTGGCGCTTGGTG  
GACGTCAGTGGAAAGTTGAAGTGGAGCGGGCGAAGGGAATCGAACCCCTCGTCAGTA  
GCTTGGGAAGCTACAGCTCTACCATTGAGCTACGCCCCGCGTGGCGTTGCGAGAGTTT  
AGGCGGGTGCGGGTGTCGGGCGCAATGCGCAGACGTGACGAGGGCCGGTTGCCCGG  
CCCTCGTGTCTTGACAGATCTACCGCGTGGACAGCTGTGCGGCGTGGATCAGAAGTTG  
CCGCTGAAATTCACAAACAGCGTTGCATCGCGGGCGCTGCGCTGGGCGGTGGTGGT  
GCTCAGGCCGATATTGCTCTGCAGGCCCCACAGGCCGGTGGGGCGCCAGCACGA  
CGGTGGCGTAGTTGCGATCGAAGTTCTGGCCCCGGCACGGTGTACATGCCCACTTCCG  
GCATCGACTGCAGCCAGGCGCTGGCCTCGGTGCCGTCTTGAACCTCGTGGTCGTAGG  
TCGCCTGCACGTACGGCTTGACCGCAGCACCGTCCAGACGGACCTGGAAGCCGATG  
CGGCCACCAGCGAATCGATGTCCTGATCGGCATAGCCCAGCGCGGTGGAGCTTTC  
GTTGCTTTCGGTGTAGCCGTCGAGCTTGAGCTTCTGCCAGGTCAGGCCGACCACCGG  
GCCGTACTTGAGGTTGCCTTCGCCAGCGAATAGCCGGCGTTGACCGCGGCGGTGA  
GGTTGCTGCCGTCGGGCGAGCCGCTGTGTACGCGCGTTGCCGGCCCCGAGCTGCACTT  
CGCGGTCGACGTCGTAGCGCAGCGCGCTGTAGCTG

>CONTIG\_78\_length\_5828\_cov\_21.107525

GCCGCAACTGGGGCGCTTCCGCAACCAGGCCGAATACATTGTCTGGGGCAGCAAGG  
GCCACATGCCGCTGGATCGTCGTGCGCCTGTGCTGCCTGGTGTATCCGTAAGTCGG  
TGCGCAAGGCAGACAAGCATCACCTGACCGGCAAGCCCACCGATTTGATGCGTCAG  
CTTGTGCGAATTTGTGAAGATGGTGGATGCCTGCTTGACCCCTTTGCGGGCAGCGGC  
ACCACACTGGTGGCGGCCAGCCTTGAAGGCCTTGGGTGGACTGGAATTGAAACCTC  
GTCGCACTACCATCAGGTTGCGATGCAGCGGTAGTAAGTACTGCTTAGGGCCACTGAGC  
CATCCCTTTTGCCTAAGCCGCTGTCTTAGCGAAAGACAAAAGGCTAACGACCCCTCG  
TATTTTCCTCCTAGCTTCAGGGGCGCACGGTCAACAAGACAAAAAAGCCCTAA  
AAAAGGGGCTTTTTTCAACTTGACAACAGACTCAAAAAGAGTTCGCTGCCTTTTCCC  
TTGCCAGAATTCTACGCATCGTTTCTTGGGCGCGCTGCTTATCACTTTCGCTCCACGC  
GGTGTCTACGCCACCCATCGGTGCGGACAGGGAGACAGTGTTCGCGTTGAGGTACTC  
GCGCACTAACCTTTGATCGCCGGTCTCGAGCTTGCTTACATTCTTTGTCGTGAGATCC  
ATAACGTGGCCCTGGGTAATGAGTGTCTTCTACTGCGTCTGCGTAGCTTGCGCGCGCA  
GGCGTAAGGTTGTGACTGTAATCTGTGAAATTGACGAACTTGATTTGCCCCCGGTC  
ATCGGGTTCATGCTGCTTGGCGCTCTCGATACACTTGGTTGAGCACTTGTTAACGGAA  
AAGCAAGCCATTGCTGAAGAGGCGCCACTTCCGCAGAACAGAGCAAGGTTCTGGTA  
CGCATGATAGTTGCCAGAACTGAAATCGATAGTGAAGCCAGGTTTTGAGATGATCGT  
CACGCAAATTGGAGAGAGCGCGCCGTTGCTAAGCCTTCTCTCTGTAGGAGGCAGGTC  
AATCTGATCTCTGGCAAGAAACCATTCTTTCCAGGCTCCGATTAGTTGGGCGTCTCC  
GGCACATATCATGCCCCGCTGAAGCTCGATCAGCAATCTTGTCGAAGCCTGTGTCATC  
GACGTACACCAAATGGCCGCCGATGAGAAGAGACCAGCGAGAGTCGCTAGCAAGC  
CGTTTGGAGTTGTTGTCCAGAACATTTGTAGTCATGTGTCTTCCTTGACCCCCCGGT  
CAATGCAGCGGAGTATAGGGTCTAGGGAAGCGCGCTGTGTTACGCGCTGCCGCATTC  
ATGTCCCCTCTCTCGCGACGACTTATCCACAGGTTTCCCACTACATGTTGTGTTCTCG  
GACTGGATTGAGGCACATGTTGTGGGAAGTGGCGGGCTTTTCTCTGTCAATAGTTTT  
TTCCTATTGATTATTCGAATTATTCCAATTCTGCAAATGGCTTGGCGCGGGCACGCAT  
TTGGCGCTTGCGCGCGCAATCGTCGCCCCGCCACGCCTGCGGTCTTCATGCATGGTT  
TTCGCTGCACCCCCGCAGGGTGGCCCTAGGGCGCGCTGCTGTTACCGATCCGTACGA  
TTTAAGGGGGCCTCTCTTCCCTGCAGATCCCTGCGCGCCTAGGGCGCTTTGCGCGCG  
GGGTACGGCTGCTTTCCTTGGCTTGACCGCCGGGTGCATTTTCGGCAAATGACCATCG  
GAACCAGGTAATCGGTAATCCGAGACCTGAAACAAGGCCTAAGCGACTGATATCAA  
TGGGAAATTATGGATTACCTCTTGGGGTGATTTAAGGTAATTGTTCTCCCGTAAGAA  
AGTTATGTCATTGAAGTTTAAGGGTATTTTTTGGGAGCTTAATTACCTCCCTAAAAG  
GTAACCCCATTAACCTCTAAGTTACCCTTTAATTACCTTTGATATTTTTATGTAAGTAT  
CTGATAAATATATGGATATTTGCATTTATGAGGGCGGATTACCTAAATTACCTCCTC  
CCGATGGTCATCCCAAAAATTGCCTATTAGGGGCGCTGGAAGGGGGCTCCGGCCACC  
GCACTTGCGTATACGCTTGAGCACACGCGCATCGACCGCCCATCTCTCGTGATGGC  
TGAGCCTGCACGCTGCCGTAGAAATTGGAGCCAGTCCGAGCCGCCTGAGTCAGGCC  
TGCCGGCGCGCGATCAGCACGTGGCGCGCGGAAGATCTGCCAGTGAGGTAGTGAAG  
CGTCCCGACAAGAGCTCTTGCCGCGAAGCCCATCCTGGAGAGTTCTGCCACCCGCTT

GCACCGAGGCCGCGCGGTACCCCGCCCCGAAGCGTCGGTTGATAGCGTCCAAGGCGCT  
CATCAGCTTCTCGTCGCCGATCCGAGCCGGAGTGAATAGGTCGCCCTGCAGGTCTTC  
AGGCTTGGCTAGATCCATCAGGCACACGCCGGCCTTTTTGTAGGCGAAGCCTTCTCG  
CATGAAGCCCTGGAACAGCCGGCGTACAGTCGTGAGCACGATGCGGCTGTCAGAGG  
TGGCAGAGGCGAGTGGGGCGGTGTGTGATGGGTTGTGCTGCGGTACGCACGGCTTG  
AACGAATCTGTTTCGGCAAAGATGCCAATCGCGCTCGACGTCAATCCGCGAGCGCG  
CAGCTTCTCGGTAGCACGCATGGCGAAGGTGGCCAGCGCCTCTGACATATCTTGCGG  
GTCGCTTACCCATGTCCCGAACGATCGGCTGACCATGATTTGCTGCCGGTCTGGCTC  
GACCTCCTCGAGCTCGAGGCAGGCGTGACCCTGCAGCTCGCGCTGCGTGCGCGCCAT  
CACCCTCCGAACCTCTGCGAGCAGGTCGTCTGCAGCCGCATCCCGCAGATCCGCTGC  
CGTATACACACCGCGTGCCTGCAGCCTGGCGCTCCAGCGCCTACCAATGCCCCAGAG  
GTCGCCAACTGACGTGGCTCGCAGCACGGCATAGAGCTCGCTTGCCTGAGCGCTG  
CCAAGTCACAGACGCCGGCCAGATCGGTCGGGTAGCTGCCCCGGTTTGCGCGCCGCA  
TCCTTGCGGACCCGGTTGGCCAACTTGGCCAGGGTCTTCGTGCGCGCGATGCCGATG  
CAGTTCGGGATGCCAGTCCATTGGTGAACGCGCTCGCGTAGGTCGACCGCGAGCTG  
CCGGCGATCGCGGATCCCGGCCAGGTCAAGGAACGACTCGTCAATGGAGTACACCT  
CCACACGCGGCGCGGCTTGGCGAAGGATCACGCCGATGCGCGAGGCGATGTCGCCG  
TACAGACCGAAGTTTGCCGAGCGCAACGCCAGCTGCCGGCGGATCTGCGGGGGCAC  
CTTGTGGATGGGCTGTCCCATCGTCACGCCTAGCGCCTTGGCCTCGTCCGATCGAGC  
AATGGCGCAGCCATCGTTGTTGCTCAGCACGACCAAGGCCTGCCACGCAGTTCGG  
GCTGGAACACCCGCTCGCAGCTGGCGTAGAAGTTGTTGCCGTCGATCAACGCGAAC  
ATCAGCGGCCAGCGCGGGAATGAGCGCGCGTGACCTGGCGGACCACGCCACGACC  
GCGAACACCTCGACCTCTGTGCCTGGCGCCAGGACGATCGGCGCGCAGTGTGGACT  
GCGGCTGTGGAGCTCGATGTGGTCGACCGCGACTTGAAGGATCTTGCAGACGGGCT  
GATTACCATCCAGGTGGCGAGCACCATGTGCGCCATTGATCGGACTCACTGAACGAT  
CCACCACAAGGATGTCCCCGTGCGAGACGCCAGCCAAGATCATGCTCCAGCCCTCG  
GCCCCGATACAGAAAGGTAGCCGGCGGATTCCGGATCAGTACCCGGTTCAGATCGAG  
CTCGTCGTCTTGAAATCCTCAGCGGGCGAGGGGAAGCCGAGCTGGATCCGAAGCG  
CGCTGAGCGGCAGCCGCAAAGGCGCAGGATCGTTCGAGGCCGGGCCAAGCAGGCG  
GGCATAGGTATGGGTGGCGGGAGGGACAACATGACGCGAACTCTCGCGGGACGAA  
GTCTCAAAGGTCGAGACGGCTTGCCAAGTTAGCAAAATTACTAAGAAATAACCCCC  
CCCTGACCGAGTTAAGTTCGGTGCCAGCCATCAGGCTTTCGCCTGGAGCATGCTCCA  
GCCGGCCGCCTTATGCATGCAGTAGTCTGAGAAAAAAGTGACCGGGGGAACTATGA  
TCGAAAATTGGATAGCTGCACAGGCAACGCTGCATGCCGCGTGGATAGGCGCGGGA  
GCAACCACTGCTGTTGGAGTAATCACAGTTGTGGCAGCACTTTGCGGAATTAGCCTC  
CACTGAAGAACGATCGGCTCCAAAGAGCAAAAGACCGGCGACATCAATCGGCGA  
AGGACACCATTCTTGCTGCAGTTGTTGGCATGACTGAGATATCACAGGCATCGGCGA  
TGCTAGCTGATCCGCGTACTCAACCAGCAGAAGCGTTTCGAGATTTCACTGCGGCGC  
TAGCAAAAATCAACGCAGCAGGCGCAGTAGCAAGTCTGGAGGCGGTGAGAGCGGG  
AAAAAGCTATTTGGCAGTTGTTGGGCCGATCTTTTCCGCCGTTCAAGCTAAGAGAAT

GCTCTTGGAATCGTCTGGCGCCCCCATGAAGAATGGACCAAGCTGGCTTTCGCGGT  
GCTTGATCTCCACAGAGAACATGTTCTACCGCCACTTCACAAGGCAATTGCAATGGC  
TCGGGTTGATCTGGAGATTGCAGATGATGACGTGGAAGCATTTTTTGAAGCCTTAAT  
GCCCCGACTTGCGCGCTGGCCAAACCAATCTGGCCATGGCGTGGGACCGGCTAGGCC  
TCACGGCCTCAGTTGCTGTTCCCGACTTGGCCGGTCGATAGCAGACCGATCCAGCGG  
CGGATTAACGATCTGCATGCAGACCTCGGCAGGATCCAAGCTAACCATGTGGACAG  
CCACATTAGGTGGCGCCACCTTAAGGACCGCCTCCTTCATCGCCTTGTCTACTCGGTT  
GCCCAGCAGAATTCGTTTCAGTTGGCCAGGAAGTTGTACGTAACAAGAGTCGGAGA  
TGAATCGCCACTCATGTTTCATACAGCCAGTGATCTGTTTTGAAGCTAAGAACTTCTTC  
GGCCGTCGTAGCTTTTAGGTCTCGGCTCTCGACCTTATAAAGATTTTCGAGATAATA  
GACCCGGCGAAGAAGAGGATGGTTTTTCATCTACTTTCGAACTCAAAAGCAAGCCCTCT  
TGAAGTGTGCGCCATAGAGAGCCCACATCCTCACGTCAGACCAAGCGGCCGTGAGGC  
TGCACACTTTTTTGCCACCAATTAAGTCATCCAAGCTCGGATACGCGATCCGTCCAT  
GTGAACCGAAGTTTGATCCGAATTGTAAGTTGAAGTCTCCCTGTCTACGCTTTACAT  
AGGTGCGAAACTGACCTTCAAAGGGATCATTCAAAGAAGCGTAATCGGAGCAGTAG  
AGCCGTTTCGTGAATTGCAATGTCGAGGGCATAGAGCGCGTCGCTCGCACCTTTGAAC  
TTATACAGCAGCATGCAATTCACCTCGATATCAGACAAGTAGGCGCTGGGAGCTTCT  
CTGGGGAAATGGGCATCGCGTTCAAAGTGATCCAAGAGACATCAGCTGGAGTCACT  
TGTGATTACTGGTCTTCCTTAACGCGATTGGCGTACCTCAGAAGCACTGCCTGAGCC  
TCCGGACTCACGCCAGACTATAGCAGCCGTCTGATGGCCTCCAGCTTGCCGACAGGT  
TGGGGCCGTCGCTAGGGGCCGCTCGTTCACGGCATAGATCGACGTCCACCCAATTTT  
GAGTAGCGCCCCAGTTTGGAGTCCAATTCCCTACCCCGAGGAGATTGGACGTGAAG  
AAACGTTTTACTGACGAGCAGGTCATCGGCTTTCTGCGCGAAGCCGAAAGCGG

>CONTIG\_79\_length\_5689\_cov\_5.658936

TTGGGCGGATCGAGATTGCAGCGCATAGCGCGTCAGGGTTGATCGGGTCCGTCACG  
GTCTCGGCGGACTCGGGCAGCTGGGCGGCGTGGAAGAGGTTTCAGATCAGCATCAA  
CGCGCCGGCTGGTACCACACGACTTGCCTGCCGCTTCATCGCAGAAAACAGCCCGG  
GAAGTACCTATTTCCGGCGCGCAAAGCTGGAGCCGGGCCTGGTTGCGACCATGTGG  
ACCGATGACACGTCCGTGGTGGATCAGGCTTCGGCAACGCAATCGCTCGAAGCGCG  
GATGACCGTTAACGAGAATGGCATCGCCAGCTACTACGCGTCTTACACATGGGCACT  
CGACGTCAGCAACAAGGTGATCGGCATGCGCTCTTACAACAATGGGTTTATCGGCA  
AGATCACGTTCTCCGCGGACGTGGTGGAGATCATCGGCGCCACGCCAGGTGGCGGC  
CGCAATGAGTTCGTGCGGCGGGAAGTTCTACGCCTACGCGCCCAACGGCCGACGTGT  
GGTGGCCCTCGGGTATGGGGTGACATGACCAACGTCCTGATCATCAACGACGCCGA  
CACTGGCGCCGTTCTGCTGCAGATCACCGATCAGCCCGACTCGGACCTGTTGACGCA  
GCACATGGGTGCGATCGCGATCGCCAGCGGCAGCAATGGCTCTGTGCCAGTGCCGG  
TCACGGGGAGTGCCAACCAGCTGTACTACTGGTTTGTGGCTGACAGCGGGGCAGGC  
AATAGCCTGCTTCCGTACTTCAGCGATGACGGCAACACGATCTCTTGGGTGGCTCCA  
AACTCGTCGTTTCGGCGCACGTGCTGGCGGTACTTTGTTTTACGGGAGGTTTTGATGG

CCTACGCAGTTTTTCGAGGCCGGTCCTAATCGCATCGCAATCTCTGAAGCCTGGAAGA  
ACCTGGCCCTGGCCTCCAAGCAGACGATCACGCCGACGGGGAGCGGAACACTCAGG  
CCGTGGAGCCTGACCGTTACTGGCACCAATCCGGTTCCCGCGTTTTCTCGGTGAGAAC  
AACGCCACGCTCGCGACGCGCACCCAGAGCGGGAACAGCTTCACCTTTACCGGCTT  
CACGACCAGCGGCAGCTTTACCGCCTACATATTCGACGAGCCGAATTTTGGACTCCG  
CGATTATCTGGTGATCACCAATCCCGACACTGGACAGGTGCATTTTGACGCCACGCT  
CAAGTACATGAAGGTGCGCGGCCTGCTGCAAGCAAATGCCAATCAGGGCGGTTCCA  
TCACGTTGCCTGCGGGACGCACCTATGCCGCCCTGGCCGGGTCTACCGGCAACATCA  
TGTTGGCCATTGGCGGCTTGGTTGGTGGCGGCCCCGCAGTGGCAGGTGCAAGTGCTTT  
GGCGCAAAGGTGTCGTCAACATCAACGGTAACGTCGCCTCAATCGCCGCGATCGAC  
ACCGCGCAAGCGCTCTACAGCGGCACCAGCGGTACTCCGCAGCCACCCCCAGGCAA  
CTACGGCCAGGCATGGGTGCGTTCTCCCATCCTCGACGTTACAGGCTACTGACATGC  
TCATCAGCGAAAACCTACCTTCGGCACGCAGACAAAGATCGTGTCGCCCCGCATC  
GAGATCCGATGGAACCCGGCCACCAACGACGGGGCCGGTCGAGTTCCACCTCGAGCA  
GATGACCACCAAGCCGCACCCGGATGGCTGGACGCAAACGCTCGAGCGCTTCTTCC  
TGCGCGTGCTTACGGTGCAGATCAGCGACCTAGTCGGCCGCAGCTACGACATCACC  
GCGCCAGCCAGGACTGAGCTCGACGCGGCAACTGGCAAGGCCGTAGAGCTGCCGGG  
CGAGACAGTCACCGAGCCCGGCGTGATCTGCTGCTGGGCATCAAGGCTGCTACCC  
GCGCTGCCTATGATGCAAACGTGGTGACGCCCCGATCCGGATGCAGACCCGCTCGCG  
CAGCAGATCACCATCATCTGGAACCCGATCAACGACACCGGCACTGTGACGTTCCA  
GGTCGAGGATCGCGGCGCCGCTCTCGGCGTGCTGGCGGCGCCCATCGCCGATCTGAT  
CGCGCCGACCTACGCCATCCGCTATCCCGGCGCGGAGGCGACCCAGGCGCTGGAGG  
GCTGGAAGCTCCAGGCGTTGATCAAGGCGGCAACGGACAGTGCGATCGCAGCCAGT  
CTGGCGAAAGCCGAGCAGGCGGCGGCCTGACCACCGCTTGATCCATTGATAAGAT  
GCCGAGGCCCGCAACTCATGGAGACGGCCATGGAGTGGATCAAGATTGAGTCCGGT  
TCTGAGATGCCTGCTGAGGGAGAGACCGTCCTCACGTTGGATGGCTACCGTCATTGG  
AGCGAGGCTGTACACAGATGCGCGCGCTTCTATTGGGACGAGATGCACGAGATTGA  
GGGCGTCACGCACTGGATGAGGATCGAACTTCCTGCCTGAGAGTGGTCAGGCAATT  
CTGACGCCACCGTGCGGAACCGGCCGATATGCGAAATCCCACATGGGTGCCAATCT  
ACAGCTGCCGGTCGCGGTGCCAAGATGGCCGCTCAACCCGCGAGGGCGCATGAGCAG  
CGCCTTGCCGGCTTCGCGTTTAGGATTGTAACTCGAAACTGTCGCTACAGTTCGTA  
AGTCTGCTGCCGATGATGCAGTAGGTTGTTGATGAATGCGGACATAAGTGCTGACTG  
GTCTAACACGAATTCCTATGCGGCATCACACAAAATTGCTTGCGGGAAACTTTTTGT  
CGTGCAATGCTTCGGCGCATGCCAGCTTGACCAAGAAGTCAAGGCCTCTTGTTAAG  
GTTACGTTTTTGGGCTATAATAGGCGGCTCGCTCGCCACCCTGTGCGGCCTGGGGCTT  
TAAGGTCGTTAGAAAGACTGAAGGGGTACGCCATGGCTACCGAAATGAACAAAGTC  
CAGGAGCTGCTGTTTCGGCACTGATGGTCTAAGTGTCTCGAATTTCAAACATTTCCG  
GGCAGTGATCGCGAAGTCACGTCTGAGCAGATCGCAGGTGAGATTAACCGCGTTTTT  
GGTGAAATCATGAATGCTGGAGAAGCGGTCTAACCGACCCAATCTCAGCATAGGAG  
TGCTGCTGCAAGGATGAGCTACCGCGAATTGTACGAGCGTTGTCAGACGCTAGAAG

TGCCTGTGAGCCGCAAAAATCTGACACCTTGGGTGATGGAGCTGACCGGCAAGCCA  
CGGCTAAGGTCATCTTTCATGGGATGAACCCCAAGATGATCCGAGGCATGTTTCGTC  
ACCGCAGAAAACGTCTCGCACCCATTTGCAAAGCATGCAAATGGGCCTGGCGGGGC  
TGTTGTCGTTATTGCGCGCGATTTGAACTACTGCTGGAAACGCCTTGTGCAAGTCAA  
AGAGCTGATGCATTACTTTGATACGCCGGTTCAGCTTGTAGGCACGCCAGAAGACCT  
AGAAGCCCCTTGTGTCAGACCTCGCATTGAGAGTGCCAGGAACTAGTGAGGCGGGCA  
ATTCTGAAGCTTTAGCCCTATGGCGTGCGTTGGGTGTGTTGTGTCCTGAAGCTCAAC  
GGCAGGAATTTCTCCGCGAAAGAAATGTTGGGGCAATCACGGACATCGAGATAGCC  
CAGTTCCTCAAGATTCCAGAGAGTTACGTGCCACATCTGTTCCGGCCGAACCTTTCGG  
CGCTACGTAGGCGTTTGACTCGACGCTGTGGGATTTTTCGTAAGCGCTGATCTCAGT  
TCTTGAGACGACCATGCCGATACTCCCGGCATGGACAGAGCTCAACTCCGCACCCAT  
CTCGATCACCTGGACGCCGCCGTGTGCGCGATGCCGAGCGGACGCTGCAGGTCAGG  
GAAACGAAGAAGGCGCGCGAGGACGTGCGCATCGGCACGAACAAGATCCAGCAGG  
CGCAGCGGCGCCTCGACACGCTCAAGAGCACGCGCGGCCAGACGACAGCCGGATAT  
TCCCGGGCGTCTACTGCCCTGTGCTGGTGGTCGAGAACGGCCAGCGTGTCTGTAAGC  
CGATGCGCTACCAAGTGCCGCCCGGCCGACGCCGGCAACGTACGACCGGAAATTC  
CCCGGCACGTACAATGCCCGCCGCGACAACCTGGAAGGGTTCTGGCGCCGGCAGTT  
CGGCTACACCCATGGGCTCATGGTGGCGGACCGGTTCTACGAGAACGTGAGGGGC  
CAGACGGCCAGAACCAGCGGATCGAATTCGTGCCGCGCACCGGTGAGCCGATGCTG  
GTGGCGTGCTCTGGTTCGCACTGGCGTGACCCCGCCGGCATCGAGCCGGACCTGTTG  
TCATTCGCCGCGATCACCGATGAGCCAGAGCCGGAAGTCGCCGCCGCTGGCCATGA  
CCGGACGATCATCAACATCAAACCAGAGCACGTGACGTCTGGCTCAATCCGGATC  
CGCGCAACCTGGATGCGCTGTACGCCATCTTCGACGACAAGCGGCATCCGTTTTACG  
AGCACCGCATTGCCGCATGAGCACTGCCGGCGACAATGTGCCCGTCTCGGCCGACC  
CGGCCATGCAGTGGCGGGCGGAAGGATGAGTGGCTGGAGCTGTTCTATCTTGGCTCGC  
CGGTGATCAAAAATCTGTGCCCAAGAGGACGGCACCTGTCTGGTCCGGACGCGCGCC  
TACAGCGAAGGCCCTACCGTAACCCGGCATATGGCCACCGAAGCTGGAGCTCTTCG  
CTATGCCAACGCCTGGCTGCTGAAGTGGCACGGTCTGGCGAAGACCGAGATCAACA  
ACAAGTTCAAATCAGCACAGCTGCAGAAGCAAGCGGCCGAGGCGGCACGACGCGA  
CTACCCTGATTTAGATCCGGCGACCTTTACAAAGCGTCGCCGCCGCTGACACCTGGC  
GTTTGTGCACCGCGCTGCATCGCCAACTCAACGATCGACCGCGCCGACCTTACGCAC  
ACCGTTGCGGTCTTGGTACTTGATGTTCCACGGCGTAATCAGATACCCGGGACGGAA  
CCGTTTTTCGATTGAGAAGTGATCGGCGCGTGCGTCCTTCGCGATCCCGTTACCCAG  
CACATACGGCGTGGCGGGCCCTCCGGACGCGGCAGTCGCCCTGATAGCCGTCGGTCTT  
GAGCGCCACGGTATAGGGTCCATGGCCCTGGATCTCGCCGCACGCCACGGCCCGTG  
AGCTGACTGATGCCGCGCGGGCGCGAGGCGCCATGCGGGTAACGAAGGCGTCCAAC  
GTCTCATCAGCCAGCGAGGTTGCTGTGAAGAGGTGCGTGGCGGGTTGAACCGCGTT  
AGCCGGGGCTACCCAAGCAGCCGGGAAAGCCACGCAAAGCAGTAGCCATTTTTGCA  
CCAGTAGCGGCTTATCGGACCGCGTCATAGACTTGTTTTTCATTAGCACTTCCTCCGG  
GTTGGTTAGAGAAAGAGCGTTAAATCAATCACTTAGGCTTTGAGGTGCGGATTGAA

AATCCCCGTGTCGGCGGTTTCGATTCCGTCCTCGGCCACCATTTCCCAGCCTTCATTTCG  
CAAGGCTTTCCGGCAATCGCCGGGTTTTTCAGACTCTTGTTGTGTTTCCCTTTGAGCCAG  
GCCTGCACACAGATTGGCGGGTGGTTTTGTCGTGTCTGTCGGCTAGTGCTTTGACGA  
TAGGGCTGTGTTGCGAGCCGTCTTTGCAAATCGGCTCGAATGACGCTGCAAGTTGCC  
GTCGCAGTCAATCTGCGCGGGCGTCTTGCTCGGTCTCGCGATGAGCGCTTTGCTTCC  
ACGTCGTCTTCAACTGCGCGTGGCGATACTTGCGCGCATGACGCAC

>CONTIG\_80\_length\_5638\_cov\_23.653239

CGCGGGCCTCCGTTCTCCAACCAGACCCGCTTGACGGTGAAGACCACCAGATCGTCC  
CTGGCATCCCTGCCCTGCTTGAACAATCCGGTGGCCTCGCTTTCACTCATGCGGATC  
GGAAGATGAAAGTGCCCGGCATGCTGGGGTGTCCAAACAGATCGCTCACTGCGAGC  
ACTGGTCGGGACAAACCCCTCGCCCGTGATGCCCTCTACCTGGAATCCGGTGATCCA  
AGGAATCGGCACGTAGATATCCAAGATGCCGCGCTGCCGGTCATAAGACGGGTGAT  
CCACGATGTTGGGGCGAACAGCAAAACGCTGGATACCGCGGAACCGTTCGGCGCGT  
GCATCGAAAGCAGCGCCATACTTGCGCTCAATGGCTTCCGGCTCCTGAGCGGTGATG  
CCATTAGGCCCGTTCCGCTTCGTATCGATCAGCCACTCGCCATACAAACACTGCTCG  
CGCTCTGTCTTGCTCAAGCGGTAGCTGGACCGCGTCGACGCAATCAGCCTCGCATCG  
CAGGTGTGGTAGCCCGCCGAGGCCGTAGATGCCAACCAGCGCGGATGTGTTGCGC  
GCCTGCCAGTTCGTCCTGGTCGAGGTCCCAGTAGGTCCCTTGCGGATCGAGATACGG  
GCTCTTGGCCCTGTCCCTTGATACCTGCGGAGCCCCGGTGATGGCCCGCCCAATGTG  
CTGAAGAAGATTTCCCTTTCTGCGCTTGCACCGCCATGCTTGCGGCCATCGCGAA  
CGCGCCTATGGCCGCTGCCCACTGCTTCTTCATGCCCTGCTCCTTGCGCCAAGTTGCG  
ACGAACTTACGTGTCACGTAGAGTCTACCCGTGGCGTAAGGCTTCCGTCATGCTCTT  
TCCATGCCTGCACTGCATCGATTACGCCTGTGAAGCCCCGCCACTCCCCGCCCCCGGG  
ACGTCGTGGCTGCGCGCCTGCGTCAAGCCCGCGAACGACGGGGCCTGAGTCAGCGC  
GAGGTAGGGATGCGAATGGGCCTGGACAAAGACACAGCGTCAGCGCGGATATCCCG  
GTATGAATCCGGAGCCATGTCCATCAGCCTCGAGGCTTTGTTTCGAGATGGCCGAAGC  
GCTGGAAGTGCCGCCTGCTTTTTTTACTGGCTGGCACCCCTGGGATGGCCGACGCAAT  
TTTGGCATTGGGGGAGCAGAGCCATACTCAGCAAGACCAACTGGCAAAGGTCTTG  
TGGCGCTATCTAAGCTGGAGCCCAAGGTGCGTGCTGCGCGCGTCCAAAAGCTGTTGA  
TGCCAAACGCTGACGAATAGCGGAACCATCCGAGGCACCCCGAACCCGCTACTGCA  
GCGGAGCCACGTGCTATACAAGCATCTGGCACGGAGGCCTAGGGGGGCCTAAGCAT  
GGGACTTTATCTGCGCAAGAGCGTGAGGGTTGGACCTCTGCGGTTCAACTTGTCGAA  
GGGCGGGATTGGCGTCTCGGCCGGGATCAAGGGGCTCCGGGTCGGAACGGGTCCGC  
GAGGTAACCTACGTGCATATGGGTGCACGCGGCATTTACTACCGTGCGACCATCCCTT  
CGGGAGCCACGCGTCCTCGTCCGGTGTACCCACGCGGTTCCGTCCGTCCCGTGCCCTG  
GTGCCCAGCACTCCCTGCCTTCACCCCACAATCGCCTGAAATTTGCGGCACGCATG  
GCCCCGATGGTTCGACATAGATTCGGCCGACGCGACCACGATTGTGGACTCGTCCCTCC  
AAGCACTGCTGGAAGAGCTCAATACAAAGAAGAAGAGGTGGCGCATGTGGCCAGG  
CGTCGCTATGGTTTCGGCGCTAGTCCTTTTGATTGCGGCTGGCAACGAAGCCCCGGA

CTGGGCGCTGGTTATGCTGGCTCTCTTGAGCGTGGGAGCCATTAGCGCAACGCATTT  
GAAGGACCAACTCCGGAAGACGGTAGTTCTGATGTATGAGCTGGACGAGCCGATGG  
AGAAGGCGTTGGAAGCACTCCACGCAGGAGCCCACACCATAGCCTCCGCTTATGCC  
ACGTGGCACGTGTCCTCCACGCCAAGGTCTTCGACCGGAAATACCACGCTGGGGCT  
GGAACCCTTGTCAAGCGCAAGCCGACGCGCTTTGCCTCAGCGCCGCTCCATTTGTC  
AAAACGAACATCAAGACCATCGCCGTCAATGTTCGGAACCCAGGCACTCCATTTTTTC  
CCGGACCGCGTTCTGATCTACGACGCGAATGGCGTTGGCGCGGTGGGCTACAAAGA  
GCTACAGGTGCTGGTGTATCCACTCGCTTTATTGAGGATGGCAGCGTTCCGCGTGA  
TGCAACGGTGGTGGATCGGACATGGCGTTACGTCAATAAGAAAGGAGGCCCTGACC  
GCCGCTTCAAGGACAATCGGGAGCTGCCGGTATGCCAATACGAAGAGGTGCGCCCTG  
CGCAGCGACACCGGCCTCAACGAGCTACTACAGATTTCTCGTCTGGGATCAGCAGC  
GGGGTTCGCCTCAGCCATTGCGGGCCTATCCCGAGTCATGCCTAGAGAGCTGCCCTA  
GCGATCGCCTCTGTCAGCAATGACTTTTAAAGAACCCCGGCAGCCCTAGCGTCTGCT  
GTCCGCTGTGAGAAATCTTCCACCGCGGCACTCATGGCTTCCTCTAAAGACCTGCGA  
CGAGCCATCGCGGCCTGTGCGATCTGGAGAATGGCACTGCGGGCCGGCAACCAGGTC  
TGCCTCGATTTGGGCCCTTCTTGCTTGAATGGTTCGATCTAGATCCGCGACCTGCCTG  
GGATCGATTGCTGAGTTCGGGTTGAAGTGGAATCGTGCTTCTTTTTCTGCCGCCACT  
TCATAAGGCGGTTCGGTCAGCGCGGGCCCAAACCCCGGAACGTTTAGAACCGCATTG  
CGATTCACATCTGCTGCCGTCTCGATGCCAAACGATTCCAGCATGACTTTCTTCGCC  
GCCCCGATGCCCCGAATAGTGGCTCGCTCAATCTCGAACTGATCCAAGAACTGTTTG  
CGTGCGATCTGTTGCGGATTGTTGGACAGCGCTCGATAACGCCTTTCTCGTTCCGCAT  
GCAGACCGGCATGCTCATCCCGCAGCGGACGAAGCTGATTCTGCTTCGCTTGAAGCT  
GAGTGTCCGCTTGCTCCTGCTTCCATCGAGCGACGAGCCCGTCGTATTGGGCTTTTCG  
CTTGCTTATAGCCGGACGCCAGTGGTGCAAAGTCCGAACGGCCACGGCTGTTGACCC  
ACGCGCCCATCGCCACCCACAGACACGCCACACGGGGGCTACCACCGCAGAAAGC  
GCGATGCCAAGCACCACAATAAGCAGCCCCACCAGCCACCCGGTCGTTTTCCAGAA  
GGTGTGCCTGCGGCCCAATGCTTGAATCTGGGGATTGGCAGGCACTACCTTCACCTG  
TGGCAGCGCATGCATGGGTGGCAACACTGCTGTCGTGATATCTCGCCAAATCGCATC  
CAGGTTGAAGGGACCGGAGGCCAGCTTGGGAATGACGACCGCTGCACCGCCAAAGA  
GCGAAATCCCGGCGCGTTCAATTGGACACCATGGGCACTCAGCCAGCTCATTGAAA  
TAGGAATGGGACGGCCTGGAAGAACACCGTTTGAAGTGCTGCTCCAGCTTCGTCAG  
GGCCTGGACCCAGTCTTCTGCCTTGGGCCGCCCCGCCCGGCTTGGCCCCCTCGATGCC  
AAAGGCCTTTTCCCAGAGGTCTGCAACCCAAGGTGATGCCGCGGGCCGGCGAGGCAC  
TCAATGGCGGGGGCTTCATGCGGGTGCGCGCAGTGTCTTTGCCGTAGGCGTAGCGGA  
ACTCAGGGATCGCCTTCTCGATTGGCATGTCGCCCCGCCCCGCTGTATCGGCCAGCAA  
AGGGATGCCGACCGTTCATGAGCATCTGAAAAATCAGGACGGCCAAGCCGAAGTTG  
TCGTGGTTGGCGGTTTCGTGTGACTTGTTTGAAGGCCTTTCCGTGGAGCTCGGGCGGC  
GTAAAGTCTTGAACGCCGACCTCACAGAGGAAGGTGCGCCCTTGATGCGAAACCTG  
GAAGCTGTCCGTGTCGATCAGCTTACGGTTGCATCGGGTGACACCCGCACGCCTCC  
GTGATTGACATCCCCAACCAAGTGACCCGCATGGTGAATAACTGAGAATGCTCGGG

CCGTGTTCAAGGCGGCACGAACAACCAGTCTCCAATCGGCCTGGGGAAATTCCGCC  
AGACGGCTTTTCGGACTGTAGAGCTTATGTATGTCCTTCGACGCACGAAGGTTGGCC  
ATGACGAAGCCACAGACCTTGCCATCGGATTGCCGCAGCACTTCAGTAGGCCAAGC  
AGTGAGCTGATCCAGCGCAGCGGTCCGAAGGGCAGCCATAGCCACCAGCTTGTCGG  
CTCTCTCACTGCTTACCGCAGCCAAATAGATTTTGGCAGCCGAGTCCGGCCTCCCCT  
CGACTTCGAAGACCGTTCCCTCTCCCCCTTTGCCCAGTTGCTTTCCAGCCGAACCGG  
TCCGGATTTACCAACCAGAGCAGGTGAAACCACTTAGGGCGTCCTCTACTGGCGCCGG  
TGCGTCTGGCAGCTTCGCCAGCCGACTGGCAAGCAGGAGCGTCTTGTCGTCGTCGGT  
CCGCTCGCAGATCACTGGCGAGGCAAGATAGGCTTCCAACCTAGAGGACAACCTCTT  
CGCTGTAGCCTGCCCCCTCTAAGGCACGGACCGGCGCGAATATCTTGTCGAAGAAG  
GGCGAATGAACGCTCTGCGTGGCTTGGTGGAGCACCAAGGCTTCGATGCCATCGGT  
GAACACCGCGACCTCATCCACCGCGCCACATTGCAGGAAAACCTCCGCGTTCAACA  
CGGCAGCCGGATCGGTGACGAAAACGGTCGTGTTGATGTATTCCCCGTGCTGGGGCC  
AAAACACATAGGCCCAATCATCGCCGCGAGGGCGAATAACAATGGCCCCGTGCCCC  
ACCTGGAAGAAGCATGTATGCGTCGGGGAGACGATAGCCGCCACCAACGTGCAAGC  
ATACTCTCTGACCTCCAACCCGTGCGCCGAGCCCTGTGCGCAATACGGGTCGTAAC  
GCCGGCGAGCCAGTTCAAGACCACGTCCCGCGTTATCTCTTCAACGCCATGGCCGTC  
TTCAAAGTGTTGCGCACACAATCCCGAATCTCCGACGTCGCTAGCTTCGCACCGGT  
CTCTGATTGAGATGCACTTCCCGCACCATCCGACGCCACCAACAGCACGGTGCCGTG  
CTCTGGAAAGAATTCCTGTCCATAGGCGTCCTGGCAGTCCGTTCCAAACTTGATGTG  
GGATGTACCAATGGATGAGGCCGCAACGACGCGCCAATCCTGGAGATCATTACAC  
GCTGGCCCAGCCGTCCGGGGCAGTAGGGTTGACCAGAGGCACATTATCTCCAGGGG  
TCGAACGGGACACCGCGCTCATTGAGTTGGACAGCCATTTGAACAGTTCTTTGAACT  
GGAGGCCCTTGAGATGCAGCGGTGCACGCGAGGAGATTTTGCCAAGAGTGTCCATG  
TCTGCCCCCTGCACGCCAACCGCGAAGAACTGAAAGTTCTTTGTCGCTTCCCCTTCC  
CGGACCAAAGCTGCAGCACGTTGCCATGCGTCGGTCGGCGAACCATCGGTGATGAG  
AAACACCCAAGGTCGGTAGTAGGAAACGCCGTTGGCTTTGTAGATCTCCTTGCGTTG  
CCGAACCATCTCCAAGCCTTGCTCAATCGCTG

>CONTIG\_81\_length\_5599\_cov\_53.746528

GCTGGCATGCCCTCTGAACTGAGGGCTCAAATCGTTGGACATGAACTCGATGATGAG  
CATCACGCGACTTACAGCAGAGAGTTCACCAATGCGGAGAAGCTCCAAGGCATGGG  
CCACCACTCCCCTGGACTGAATTCAGTAGATTTCAAGCTTCACTTGGCTACTTTGAGG  
CAGCATCTGGGAGCTCCGAACACCCCTAGCTAGTCCTGATCCGCGTGTCTTACACGT  
ATTGACAACCCGCCTAAACGCTGCCTATAATTAACCTCAATACGGCCCCCTCTCGCCAT  
ACGCACGAACATCTGCGTATGGTGCTGAGGGGTTCTTCATTTCAATTGATCCCATATTT  
CGGACCAGTTAGTTGGAGCTCCCATTTGGGATACGCCTAACCCATGCTTAGCGAGAT  
CTGGAAAGCTTTCCAGATGCGCTTTGAGGCGATCTGCCCAAGTAGAGTTTGCAATTGA  
TGACCATCATGAGATGGCGAATCATCTTCAACAGCATAAAGCAACGCGCTCTGGCA  
AATTTGTCTGTGTGGAAATGAGCCACCCATGAAATTTCAAGCCACATCAGGCAACCTC

GGCTGCTCATCAACATTCCGGTTCACAACTGCTGTGATGGGCGCAAACGTTTCTT  
AAATAATTCAAGCTCCGCAGCCAAGTTGCGAAAATACGTCCGTTAGCAATCCCGTAT  
TTTTTTGCAATCACGTCCTGCTCTGCTTCGCGCATGCCGCCATAAAGCACCGACAGG  
GCACCGAAGTCCCATAACCTCACACACTACCCAGATGGCAAGTGGTAGCCCATATTTT  
TCTTTATTGTGTTTAACGAAATCCTCTTTTCGATCTATCGACAAGCTGATTATTTTTACT  
CAGCCATATCTCATGAGCTGTCCCGCCTTTTTGAGGATTGTAATGTGTTGCAAACCTC  
TGATGTAAAAGGCCAGGGTTCGTATAAGCAAACGTATCTAGCTTTCCCAATGTATGA  
GAAATGTCGACTCGGAGAGCCACCTCTATTCGTTCAAGCGCATCGCCCACAAGGTGC  
CGCAATCGCTTATCGAATACATAAAGTTCAACGACTTCACTGAACAATGTGCCACGC  
AAAAAATCATCAGTTGCAACACTTTTTACTTTTAGCTTCTCAGGCCTTTCATAGCTTT  
CGGTCAAGTCAATGTATTTGGCGCGCAATCGAAACGGATACCAGTAGCCGCTCAAC  
CGATAATAGCCAATCCTTTCCAAATACAAGAGTGCTTTTCGGCTCATCAGTCACCCCC  
ATGCCCCGGGATTTTAACTGATCCAACCTGCTCTTGATAACTCTTCCATGATTTTTGAT  
AAGACACGAAAGCTCCCCGGTAATTTATTTTGC GTTGT CAGCCAACTTAAAATTACT  
GCCCTTATGCATCTCAATCAGATTGTCTGGCTCAGAAGCAAACCAGATGTAAGAACC  
CCAAGCAATGTTGGAAACACCTTTTTTTGAACACTCCCTTCCCTCTATCCTGGTATGCA  
GTCAGAAAGGCGAGGTTTTTTTCACTAAAACCAGCTTCAAGCGCAATCGTGGTTAGA  
GCCACCTTGCGCTCTCTTGATCGGACCATCCGATGCAACGACCTCTACAAAAACG  
ACTAACACATCTTGGTGATCATTGGAGTTTGACTCTAAGTCAACCAAAAATAATATCA  
GGAAGTGTTTTTGCAGGGTTGATGTTCAAGCCTAATGCTTTCATCAAAACATCGTCA  
CTCACCACCACCTTATTGCCCCGACTCGCTAACCCAGAGAACTGCAGGATCTCTGAGG  
AAGTTGGGTGCAAACACTTCCACTACTGCCTTTGTAATGACACTGGATGGCCCCGGT  
GCCAAATCGCGAACACCCTTGCCATTTGGAAAATTGACCGTCACCACACCTGATGCA  
GAAGTTCTACCATGATTGACAAGATGGATACGCATCAAAGCGCCCTTGGAGAGGTG  
CTTTTTCTGCCAAGCCGCTATTGCACTATCTAAATCTTCTGCCTGCAAATTGGAAGCA  
AACAGCGCGGCAAAGCCGGTGCCTAATGCATACCTAGGCTTCGAAGAGGTTGTTGT  
CACCCCTGCTCGCTCGACGACAGCACCCGCAGGAATGAAGGCATCTTTGATTGTCTC  
GTCTCTGACTTGTTCCCGACTGTTGGTTGCATACCAGGGATTAGCAACCCTTGCTTT  
TTGTTTCGATAAAGACCAAACGACCCATGACTTGCGACTCTCGGCATCCAACAAAGC  
AGCCTGATCATCAGACATGTCGGTGACTTGCTTGGGCGAAGCCATCCACCCTTGCC  
CTCTACCGCGCCTGCATAGAACATCACAAAAATCACCCGAGTAGCGACTTCTCTTGT  
GGCATATCCGCGCTGTTCAAAACCTTCTGGAAAGATCAGAGGAAGTCTCTCTCGGAT  
CAGATCTAGCGAAGGCACATCAGGCAAACCTCATCGGTCACGGCTCTCCGTAGCAAG  
TGTTAACAGCACGATCAATGGCTTCAACGGATGCTCCGTTGATCACCAAAAGTTCAA  
TTTTTTTCAGCTCAGCAATCGAAGGAAGCGGGATTGCATTGAGTTCATAGGCAGAAA  
CAGCAACGCTCCCAGTATGCATCGGAAGGCTCGATCCACAGCTTTGCTGTTGAGCA  
GCGCCGCAATTGTTGCAGGTTGAACCTGCATCAGTTTCGCGGAGGGAGCCTGGATCA  
AATTGAGGTGGTTCTCGATGACGCATCCGCTGGTGCGGTCAATAAATTCTTGGGGAA  
GAACCGCAGCTAGCAATCTGCGATCTTGCTCCTTCGATGTTGTGCGTTGAAGAATGA  
CGCAGGATTTCTTGGTGATCAGGTGCTTTTGATCGGCTTGAACGTCAATGAACGGCG

AATGGTTACGACGTTGAGCGCTAAAATTAAATCCAGCATTGGTGATCGACTCAGCCC  
AGATGAGTGGCAGCGAATTTCTAGATTTTTTATTAGAGAGCTGCTCTTTATGTCGGTT  
CCACACCAGAGGCCCCGTAGAAACAGCATAACCGAGATCTGCAAAACGGGTTTTCA  
TCGACGAAATTTTTTCGAGAAAACCTCGCATCGCCACTCGATCTTGGAAGCACCCATG  
GCTCACCTGTCTTATCAATCAGGATATCGCCAACCTTCTCCACTTTTGCTGCATTCAA  
CCCCTGTGGCACGAGAACGGAAACAGACACAGGGCCAGTTTTTTTCGTCTCGAACAT  
AAGTAGTAAGCAAAGTCTCCTGCAGAACATCGTCAAAGACGTCATTTTCGGTCAGAG  
ACAAAGTTCAACGCAACCGGCGTTGCTTCGGTAGTGACCAATTCTCGCAGTGATTTA  
AAATATTGGCCACCGAGGAAGGATGTCGGCGTCAGATAAGCAATAACCCCCCTTTTTT  
TTGACCAAACGAAGCGCCAAGTCAGTAAACAAGCCGTATAGGTTTGCATGTCCATA  
CAGCGACCTTGCATAGTGCTTTCGAAGTGGTTCACTCAACTTCAAACGCCCCGTAAGG  
AGGATTTCCGATCACCAAATCGAACTCCCCAATATCTCTGGGCCGCAGAGCATCGGC  
GACATCCACTACATCGGCAAGCCGTCGCTGTGCTGCTACACAAAGCGGCATCACGG  
CGGCTTCAAGCAGCACTCTTGTTCATCCATGCAGCGAAGGGGTCAATCTCAACACCAC  
GAAGTCGTTTACCCAAACTGCGCACGAGCCAGTCGGGAGACGCATCAGAGCGTGCA  
ATCATTTCGGAGTGCGACAGGGCGCCAAAAAAGCGCCGCCTCCACAAGCCGGATCGAT  
GACACTCCCTTTTTTAAAATCAAAACCCGCTTCTTCCGCAAGATCAAGCAAGCGAGC  
CACGAGCGGTGGAGGCGTGTAACGCCCCCAACTCAGAGCGCAAACCTTGGAGGGCA  
AGGTCACAGTGTAGATGGACCCAATCAGGTAGCCCGCATCTTCTACTGGGAACTCAG  
TGATCAACTCACCGATAGAAGTCGCTACTGCTGCAACGTCATCAGGAAGAACCGGC  
AGATCTTCTGGGCAGGGACGAGCCTTCATCGAGGTTTCGTTCTTTCGTGCCAGACAG  
TCCCAGTAAGTCTCGATCACGGCAGCACAGAAAGCTCTGCCATGAGCAAGCCTGCT  
CTTTTCTGGCTTCCTTGACTCCGCATATCCTCGTGCCATCGCCTTACAGGCCTGATAG  
CGTTGGAGTGTGGACAGGCCGTTATGGACCTGGATGGACGATGCCTTCAAATTCATG  
AACTTAGACCGTTGAAGGGTGGCAGGAGTCGCTCCTACCACCCAAGAGTTGGATGA  
CGATAACACTACACAGGACGCAGACCTAGCTATGGCAGGGATGGCATGCGGTCAAA  
GTGGCACAGTCGCCTCGCATCACCTGAGACGTCTCAGAACTTTGGACGTTTGGGTTT  
GGGTTTAAATTTTAGCTCCCACTGACCACCTTCAAAGACATCAGTTCAGGCTGCTG  
TAACCGCAGAAATCTCTACTAGCTAATGGCCATGGAATCGGGGATGGGTCAATCAG  
CCCGGACTCTAAACCCGACCACTACTCAGGGCGCGGGGACGTCGCGGCGCTGGTCA  
CACTACTCCCGGGCTCACATCTGTAAAATATCAAATCGCCTTGGCAACCATCAAGGC  
AATACTTCACCCAACAATCAGCAAGGAGAGCAAATGATGTCATTTCGTCAATTTTATT  
ATCAAAATGTTTGAGACCGCTCCATTCTGGACTATCTTCATGGGGATAGGCCTGAGT  
GGAATGATTGGCGGACTTGGGGTTTATTTAATTCACAAGGACAAGGAAAATACTTCT  
GACAACACACCTTTTTTCCGTGTCGGAGTTGCAGGATTTTTCTGTTCGCTATCTCAG  
CTTTTATGATTTTGTCTGCATTCAAAGATATGGCTGAACTGCCATAACAAAAAGAAT  
AGCAGTTTCAATAGAAGCTGCTATACATCCGAGAGCAATGATCGTCTCGATTTCGCTG  
ACGGCACGATTTATTTTCTTCAGTAATTTTATTATTTCATTGGAATTTTGTATAGCAAT  
TAAATTCAATGTCAAGTCCCTGGAATATTCGCAAAATAATTGGCGAAGCGTCCCTGC  
TTCGCCAATTCATTATTTGCAACCTCATAATCTCGGCGGCTTGAACCTAAGTTGACA

CTGGCCGGACTCGCTAGGTTTTAAGACCTCGTTCGATGGATGATCCTGCGGACTCTG  
CACCCTGGCAGATCCACCTTAAAGTTTTTCTCGAACTTTCCCTTGATTCATTCATG  
GCACTCCGTGCATTTTTAATCCGCCCCTCTCTAAAACTCATGACTCGCTTCGAGACCA  
TGTGCTTTGCTTTCTGAGCCTGACGATCAGCCAAAGCTGACTTAGCCGTTGGCGTTTC  
ACCCTCAAACCTCCGAGATTCTCGCCTTTGCAGCGAGGTAATTACACTGCGCACGGTA  
GGGGCTCACCAGCATCCTCGCATAACGCATCATAGATTTACCCAACAGCTCCGTATC  
CTCGAAGAGAAGTGGCTTTGTCGCGTAATGATCTACTCTGCGACACAGTAGGGCTTC  
ATAGGCTTGTTAAAGCAGTCTTCAATTTGGATGCCAGGGATGCTGTTGAGGATATT  
CAACGCTTGCCGAGC

>CONTIG\_82\_length\_5592\_cov\_35.271912

TACGCCCACGGCAGAACATCGCCAATGTCGGTGGGTTTCGTTGCTGTATTTTCGGAAGT  
CGCTGCATGGGTTGGCCTTCACTGGATGCCGCCGGTCAGTGATCCGCAAGGGCGGA  
ACACTGACCGGTAGCCCGCTATGCGCGGTAGTGGTTTTTCAAGCGGAGCGCGCGTTT  
CAACGCCTCCGGCCATTGCGTGTCGTACTTGGTCAGTAGAACCAGGCCGATGTGGAT  
GACCATGTAGAACGGCAAGCTCCACCACGATTGCAGGCCAAGCACGAGGGCTGCAG  
CCGTGCTGAACGCGACAACGGCCATGTCGCGCGGAATGCCTACAAGAAGCCTGGGT  
GTGGACAGTGCGCGGTGTACCGGCACCTCATAGCCATCTGGGTTGGTTTGTTCGTCC  
ACGATCAGAACACCGCGCCGCCGCGCAAGCCAAGGAAGCTGAGGAAGAACGTGCTT  
GCGCTGAAGGCAACCGACAAGCCGAGTAGGACCGCCATCAGCTTTTTTCATCCCGGT  
GCCTCCTTCCGAGTTCGCCATCCCGAGACCACAGACAACGATGGAGATCACCCCAAT  
CGCCTTGGCGACGGGACCGGTGATGCTATTCAAAATCCGATCTAGCCAGTCTTCCCA  
CGGCATGCCGGTGCCGCTTGCGTAGGCGGCAGCCGGCAACAAGAAAAACGCCAGCG  
TCAGCAGCTGGAGAGTGCGAGTGTTGCGGAGCTTCATCGTCATGTCCCTGGAATGGG  
TTGGGGGAATTGATGCTTACCCTTCATATGGTTTGCAAAACCAATTGCACACCACATG  
CCTGAATGTAACAAAACATTGCACACCGTCGCAATGTCTTCAGGCAAGCGTCATCGT  
CCGTTCTTTGACGGGTTTCGCAGTCGGAGTTGTTCTTCGCGCCGGGTAGGAAAACAC  
CGACGCGTCGCTACTGTTTCAGCTACTCGGCTGATATCAGTTTGTAGACATAACCCTTCC  
GGTGCCTGCTCGATGCCGGTGACGCGTAGCACTTCACGCACGCGGCGCACCCGCTTT  
TGACCGCCGTCCGCCTCGATTGTCTCGAACCCGATGCTCACGATGATCTGCACCGTG  
CGCGCAATCTTGCGCGGAACCGGCAAGAACCCGCCTTGACGAGCAAGTCTTCGAT  
GCGCTCCAATGCTTCGTTGGCGCTGTTGGCGTGGATGGTGCATAGCCCGCCGGGATG  
GCCGGTGTTCCAGGCATCGAGCATGTCCATGACCTCCGGGGCCACGCACCTCGCCGAC  
GATCAGACGGTCTGGTGTACATACGCAGCGTATCGCGCAACAGGTGCGTCATGCTGCG  
AGTGATCTGGTCGCGATTCCGCACGGTGCGCAAGCGCACGACTTCATCAGCTTCCAC  
GCGCAGTTCTAGCGTGTCTTCCAGTGTGATCACCCGCCCGGTGATGCGGCCCATTTC  
GTACAGGACGGCATTGGCAAAGGTGGTTTTTCCGGTGTGGCTGCCGCCGACGATCAC  
GATGTTGTGCGGGTCATGGACTGCCTTGACGATGACATCCCGTTGTGCTGGGTGAG  
CTGCCCCTTGGTCACATAGTCGTCTAGGGTGAGCCGCAGATTGGATTTCTTGCGGAT  
CACAAACGTCGGGCCATCGGGTGATTCCGGCGGCAGTACAGCATGGAAGCGATAGC

CTGTTTCTGGCAGCTCGGCCGGAAGCTCGGGTTGTCCTTATCGGCAATCTCGCCGA  
CGTGATCGGCCACGATCTTGATCACGCGCATGCGCGTGTTACATCAAGCGTGTGGT  
CGTGGCAGATCCGCCGGCCGTCCTTGGCGTACCACAGCCGACCATCGGGGTTGACCC  
GCACTTCTTCAACGGCCGGGTCGTCCAGCAGCTCGCCGATCGCACCCGCCGAGCGCG  
GATTTTCATCATGTCCAGCAGGCGGCTGTGTCGGGTGATGGCGGTGGGGATCGGTGCG  
CTCATGGGGCTGCCTCGGGTTCTGGATCGGCGTCGTCTGGCTGTCCGGTCGCCCCGTT  
CCAGGGCGTCGAACTCGCTATCGGTCTGGGCGCGCAACAACGAGCCGGTCAACTTG  
TCCAGCAGCGGCTGTGCTGGCTGAAAACGCGTTCCACCGACGCGATCAGGGCGTT  
GTAGAAGCCCTCGCCCGCCGCGTTGCTGGCAGGCGTGGCAGCAGGCAGGCGTGCAA  
ACAGATTCTTGGTTGTAAGCGTTGTTAGCTCGACCAGCATCTGATTGCCGAAGTGCA  
CGTTACGCACCTCGTTGCGCAGTGACCTCAATTCCTTGAGGACCAGCATTTCTTCGG  
CTTTGGCGTGTTTCGGGGTCGTAGCGCTCTGCTAGCGCCGCCTCGACAACGGCGCGCA  
GCGGAATGCGGCGTTTCGACGGCTTCGCGCTTGGCTAAGTTGATGAGTCGGGTTTGA  
TCTGGGTGTGCAGGATGGTCTTACCGTCAGATTTCTTCATGGGAGCATGTAGTCCAT  
GTCGTCGTCGGCTGCATCCATGCCATCGGCTTTGGCGACGGGGCTGACGGTGATTTC  
ATGGGTGTGCATGTGCGCATCGGCGCCGATATCGTCATCGAGCATGGGCGCGGCTTC  
GACGGCCACCTCCTGTGCGGGCATCGGCTCGGGGGTGGCGTCCAGATCGCGGGAGT  
CTTGGACGGCCGGCTGCAGGGCGGGCCGCCACCGCGACCGGCACCACAGCGGGGGTA  
AGCTTGGTCCACGGGTTGCCGGCGACTGGCGGGCCGTAAGGGGTATGGCCTGGCGCT  
GGTGTGGCGACCGGTGCGTACTTGTGGGTTCGGATCTAGCACCTTGCCGCGTTTCGTC  
AGTCGGCGGCACCAGGTGCGAGAACCGTTTGTGCTGTAATACTTGATCTTCATGGC  
CATGATCGGCGGCAGGCCTGCGACAACGATGATCTTCTTGGCCGGGTCCATTTCCCG  
CACCTCGCCTGGGGTCATCAGGGCGCGGGCCGATTCTTGGTTGGACACCATCACGTG  
CCCTAACCAGCCGACAAGCGCCCGCCGGTGTAGTTGGTCTGCTGGTGGATCTCCGT  
CGTCATGCCAAGCGAATCGCTGATGCGCTTGGCCGTCTCGTCGGTGTTGGGCGCATA  
CCACACGTGGATATGTGCACCATCCATGACGGTATTACTTGGTCCGTAATATTTAC  
GATTTGGTTATAGCTCTGGTTGATCATCATGCACTTGATGCCATAGCCGGCGACGTA  
GCCCAGCCCTTCCTCAAAGAACTCCAATTTGCCCAAGGACGGGAACATCGACCA  
GCAACAGCAGCCGATGCTTGTTCCTTCCGGGTGCAATTCTTCGGTCAGCCGGCGCG  
TGATCTGTTGCAGCATCAGCCGGAACAAGGGCCGCAAACGTGATTTGTCACTCGGCG  
GACTGATCAGATACAGCGATAGCGGGTATGGCGCACGCATCAGGTCGATGATGCGG  
AAGTCGCTTTCGCTGGTCGCGGCACCCACGATGGGGTCGTAGTAGAGGTTGAAGAA  
GCTGCGCGCCGTCGAATGCACACCGCTGCGCTCGTTGGCGCTCTTGTTGAGCATGGC  
CCTTGCTCCGATCGCAACGACCGGATGCACCTTGCCGTTGCGGTGCTTGGTGTCGAG  
CATGTATTGCAGCGTCGCTTCCATCGTCCGTTCCGGGTGTCCAGGAACATGGCGAT  
GCCGGCGAGCGTCTTATCCGGCTCGGCATAGAGGACATGAAGCACCCGCCAGCA  
GCCACGAATCGGCCTCCTTGCTCCAATGGTCGGGTTTGCCCTTGCCGTCCGGGTCAA  
CCAGCATGTCGGTAACGTTCTGGGCGTCCTTCACCTCGTTATCGCCTGGTCGAATCTC  
GGCCAGCGGGTTGAACCGGCAGGTGTCACGCTGGGTTGGGTTGAATTTCAACGCAT  
AGCCGATCCGGCTCCGGTAGCCCGATGTCAGCTCCAGTTCTCGCCCTTGATGTCGT

TGACCACCACGCTCGCCTGCCAGTTCAGCAACGTGGGCACGACGATGCCCACGCCTT  
TACCCGACCGGCTCGGCGCGGTGACTTCCAGATGCTCCGGGGCCGTTGTGGGTGAGGT  
ACTGACCGTCTTCGGTCATGCCGAGTACCACGCCGGCCTGACCCAGCAGGCCGGACT  
TCTCGATTTCCCTGGCCTCGGCCCAGCGCGCCGAGCCGTGCGTCAAGACCGTCTCCT  
GGGCGCGGGTGCGGAAGATGGCCACCGCCACCATGGCGACGAAGCCCAGCGCTGCA  
AATGCGGCGACGATGTAGATCGCCCTGGTGAAGATGTCCGGGGCGTAGGCGTTGTA  
ATCCCACAGCCACGGGAAATATGACCACGGCGCATAGATGCCGTGCCCTGCGATTTT  
GAACCAGGGGCGCACCGAGCTGCGGCTGATAGGCCAGCGCGTAGGCAACGTACTGGC  
CCGCTGCCCACACCCCCAGAAAGATGCAGACCACGCAGGCGACCATGGGACCGCCC  
CGCAGTCCGCCAGCGTGACGGGTTTTCTCGCGTTGTTTGCTTTGTGGTGCCATCGGTT  
TAACTCCGTGTGAGTCCTAACGATTTGCCCTTGTCCAGCACATCCATTGCCGCGAAG  
CGGATGCGCACCGACTGGAATGTCTGGTTCATGCTCTGGCCCTTCGCCAGCTGCACC  
GCGACGGTGTGCGGAGCTGGCCCTGCAGGCCATCTTTCGCCGGCACCAACGCAAAC  
GCTCCGTTCTGCACGATCACCGCATGCGGGCCGCTGGGCAGATTCTCGATGGCCTCC  
ACTGTTCCCTGGAAGCGGCGGGCCACATCGAGATTGACCGGCTGGCCGTACTTGGA  
CGCTAGCCGTTTCTGTGCATCGGCCAGCTCCATGCCGCGCATGTCTTTGTCAAAGCC  
GGCCTTGAGGCGCACGCCTGCCGGAGTGCGTTCGGCCATCCGCAGTGCAACCAAGC  
GGTCGGTGCGCGCTTCCAGCGCTTCCAGGAAGTGCCTTGCGTGCGGGTGCGGCTGG  
TGGCGCCCTTCATCTGCTCAAGGCGACCAGCGGCCAGCTGGTCGTCCAGGAACGTGC  
GTGCAATGACCTGGCTCTGCTGAGGCAGCGGCCCTTCCCAAGCACGTCTAGGCGCA  
CAAAGGCGCGCTTGGGGTCGCTGAGGGTGGGATCGGCGTTGACCCGCTCCACCAGG  
TCGGCCGGCACCTGGAAGGTGCCGTCCTCCAAGTTGGTCACGTGGCCTCGGTGCGCC  
AAGGCGTCCATGCGCCGCACGTGCGCCTCGATGTAGGACTCTGGCGTTGCGTTGCCG  
GGCAGACGTTTCGGGTCCCATTCCTTGACCTCTTCCAGGTGCGCCTCAGGGGAATAG  
ATCTCATCCTTCAACCGCCGCAGCACGTTTTTGTCTGCCGCCGTGGCGACCGGCGGC  
GTGTAGCTGTGAGGGTCACGGTGTACCGATTTGCCCCGCGTTCGACCAGGTGCCGC  
TCCGACGGGGCACTGAGCGTTGCGTAATGCACCTGGCCGTCGAAGCCGGCGACGAC  
GACGTATTCGGCGCCCGATCGCTTGTGCGCCTGCCACGGTCGAGAATGACGCCCTG  
GACCGGTCCAGATGTCTCTAGGCTCTTTTCGTCTGCCAGTCGCCCCGCTCTGGCTCCGC  
TCGGCTCGAAGATGCGGCTTCAACAGTCCC

>CONTIG\_83\_length\_5580\_cov\_7.674674

GAGCAGCCAAGGATTTTCGTGGAACTTGCTGCAAGACCATCTTGAGCGGCTAGGT  
GTCTCCTTGGGGAAGTCCAGCGATATCAACGATTTGACCAAGCGGGTAGCGAAGGA  
GCTGGAGCTTGTTCCCTGAAGGCGTGAGCGACCGAGCCAAGGGTGCCGACAACATCA  
AGCTGATCTTGAGAAACCTGACGGCAATGACAAACCACTTGGCCGAAGTGCGGGGC  
CGTTATGGGACGGGGCATGGCCCCAGTGGCCATCATCGGGGGCTCCAGCCCAGGCA  
CGCGCGCTCGCCGTCAACGCAGCCCTCGCCTACGTTTGGTTCGTTGTGGACACCTA  
CCAAACCAGATCGTAGCTCAATAGCGGCGCTGGCTCGAAACAGGATTAGAAGGGGA  
ATGAATGAAAAACGCAGTGACGGGCGCTCTCCGATGCGCTTTGGCGATGGGATTGC

TCTGCGCCGCCATGCCCCCTATTCGCCAAACCCAAGTGCGAAGCCGACACCTTCACCG  
GCAAGAAGGGCTGCGTCTACGGCACCGGCACGATTGGCATGGCGGGCGTTGGCAAC  
CAGATCGTCACGGTTGACGGACAGATGGGGTTCCAGCGGTCAGTAATGTTTGTCTAC  
AAGCCATTGGATGTCAGCTCGATCCTGTTTCGTATAGATGGGAGTCGCACCCTCCGG  
TTGAGCGCAAAAAATACCACCCGACCGGAGGTGCGTTGTTCCGGTCAACTCTGCACC  
TGGTCTTGGACCGTGCTGGCCCCGATCTCTGGTGCTTTCCTCAAGGAGTTAGCTGGC  
GCAGACGAGCTGGTCATGGTGATGGAATCCGATGACCACAGACGCGGTGAGGAGAT  
GACGATGAAGAAGGGCGGGAAAATGTTGCCAAAGTTCCTTGAGGACATACAGGCTA  
ACGAGCCCTCGGTGCTGGAGACATCCAAGGCAGAAGCATTTCGTCCAGGTAGGCACT  
GATCTTCAGCCCTACACGTCGTCATCTGGGCTTTGAGGATTCAACGTAAATCGGAGG  
GTGATAAGAATGCAGGTCCAGGTACGCGTAGGGCGCAGAGGTGTTTTCTGCTTCATG  
GCAGAAGAGATTGCATTGCGGGTCAAAGAGCAGCGCTTCTACCTGGATCAATCCAA  
AGCCCGGCTCTTGTCACCGTTTGCTTCGATTGAAGCGGAAGCAGATGCGATGGAAAA  
GGAATGCCTGGAGAACCCGCCGGAGTTTTTCGATCCGGAGAACTGGGACATGTCCA  
TGGTCTATGAGGCAGCATTTTCATCGAAGCCTTGAGCACTACGACTTGCTGCATGAGA  
TGCGCGAGCGCACCCCTTCTGGGCATTGCCGCCGGCATGTATCACCATTTCGAAAAGA  
GTTTCCGTGTCCGACTCGCGCGAGAACTGCGTCAATCCGGCTGGGCCATAGGCAAA  
AAAACCCGCGATCAGATCTGGCGTTCAGACTGGAGCAATCTGGAAGCGCTGCTTGT  
GGCCTTCGGCTGGGATGTGTCATCCGTGCCTAGATACCATGACCTTGAAGCCTTGCG  
ATTGGTCGTGAACGTGTTCAAACATGGCGAAGGACAGTCCTTCGAAGATTTGAAGC  
AACGCTTTCCTCGGTTTATTTCCGAAGTACGAGTCGGGGGACTCGTGGGGGTATGTGG  
ACTACACAAACCTTTGCGTAACCGACGAAAATCTGGACTCGTTCTCCGAGGCCATTG  
TGAGCTTCTGGGAGGCAATTCCTCTTCAGCTATCCGTGGAGGAAAGCGTTGCCTCGT  
TGGATCTTCCCGGATTCTATGCGAAGGCGATGCGGCATGACGGTTGCCCGACTTTCG  
CTGCCGGTCCGTCTGCTTCTACTGCATCCTGACTACCTGATCCCACCGAGTCGTGTAG  
GCCGGCGCTGCTCGCCGCCGCGCACCCGCTTGGCCGATGAGCCAAACGCCATCGAG  
CTGCGGCCAAACTTCGCGTTGGCCCCGATCCATCACCTCTATGAGCGCTTTCAAAAGC  
GGATCCACCTCGGCGAAGGCGGTTTCACGCGCAGGTGTTGCTGTCGCCCTCAGTTCA  
AACACAAAGGGATTACCAACAATGGACGAGCAAGATTGGAAGAGCAGGTTGGCC  
GCTGAACGTGCTGCATATCGACCGCCTACATTGCACGCCAAGGTAAACCAGTTTGCC  
ATCAGGTGCTTTCGCGATACTGGCGATGGAGACTACATCGCGGCGCGCCTTTCAATG  
CGAGCACACCTATATACCCAATACCTTTGGGCCGCTGAGCAGGCTGTTGAGAAATAT  
TTGAAGTGATCTTGATGCTTAATAGACACGACACAAGGAAGCTCGGGCATGAGGT  
TGAAAGAGCGCTTGAGGCGGTCCGAGCATGCCTAAGTGTTGAACTCAAGCTCACGG  
AGGTGGAGCAGCAGGCTTTCGACAACTTGGTGCGATGGAATGCAGATAGATACCTG  
ATTAGGTCCTATCACGTAGAGCACGTTGAAATCGCAGGATTGGACCTGCTTGTGTGG  
CGGCTGCGGCAATACTGCGAGCCACTGGATGTGAACCATTACGCGGATGATCCGTCT  
CAGGATCTCCTCAAAGTGAACCTGGCTGAGATCGCAGGAAGGGCATTACATCCTTCC  
AAAGCAGGTCACTTGCCCGGTGGTGAGCTGGAAAAGATTTTGGAAGACAAGCGGCA  
TCCAGCAAGGACAGGGCTGATATGGCGCAACCTTCGTTACAACAACGCGAATCGAC

GGAGCACTCGCATGTCCACGGGCTGGAGCCTGGTCAACTCCCCGCTCGACATGGCA  
GATGATCAGGCAGTCATCAATGAGGCTAAGCGCTGGATGAAGCTGGCTTAGCCCCCT  
AAGGCGTAAGCCTTCGAGCCTGCACAAGCGGAAGTAGTGCCTTTGCAACTGCGGTT  
GCATCAAGGGCCCAGGCGTCGTCTTCCGCGTAAGGGTCTTCCTCCGAATCCTCCTTT  
CCTCCGTGGAAGAGATTGTTCCGCACGCGCCGCATGGCGACTACCAGCGCTTCGGCG  
TCGTTCTGAGGAAGTTGGTGCTCGGAGAACTTTGCGTAAGGCGAGCCATCTTCACGC  
ATCGCAATCTTCTGCTTCATTGGTCGCCGTTGCCTATCGCGTAGCAATCGGTTCGCGGT  
GTGGCTGGCCCACGAGGGGCTGAAAATGCGTTACCCATGCGGCGAACTGCTGCGTCC  
ACGATATGCCAATCCACGTCCGCCACCAGATAGGGTGTGGCGGTTTCGCTTCTAGTC  
CAACGAGTCTGGAAAAAGGCGCCGTGGCGTTTGAGCTCGAACTCAAGCTTGCCAAA  
GGCCTTCAGTAGTTTCATAAGCGTGATCTTTATCAACTGGCATTTCGGCATCTCGGCTGC  
TATGTCTAGCAAAGTGAAGTCCAATGCCAAAGGGACTGCAAATGCCTGGGCAGTCA  
ACTTTTGGCTCTTGGCCAATGAATCACCCGGCGCTTTTACTTCTACGAATCGAAGAC  
GCCCCGTCTTCCACATCGTGATATCTGGCCAGCCCCGCCTGTATTCGTAGGGGTTGG  
AGGCGAAGATGGTCGCGATGCGCAAAGCAGATCCGGGCGCGGCAACGGTTAGGAGT  
TCCAGTAGCATCCAGCGCTCCAAGCCGGGAAACACATCGAGCACCGAGGAGGTGTT  
GGATGAGTGGCCCCAAGAGGTCTGCTCGACGTGTGGGCGCGGGAGGCCATGTGAT  
CGAAGTTGGCCGCCACCTGTTGCTGGGTGGCACGGCTCAGACTCCCTAGCAGGTCTG  
CAACCGTGTAGGGGCGCCCATAGATCGTTCCGCAGCCAAGGTGTAGAGCGCTTCG  
GTGTAGCGCGTGCGCTCGTCGTATCCCAGGCTCTGGAATGACATGGCTTTGATCAGG  
GTCAGTAGCAAGCCGCCTTCACCACTGAAGCCACGCCAGCCCTGCTGGGTGAAGTG  
GGACATGGCAGCGCGCTCAACCGAAAGCAGCTGGCCTTCGCGCGGGCAGACCCACT  
GCTTTGGATCAGGGGCTGCAAACCAGGGTCAGTTGTTTCGTATCGGAAGCCTGCCTTTT  
CGGCAGAGCGCTGGCGAGCTGTGTTTCATGGCCCATCGTAGCGGAGTCGGGCGCATT  
GGGGATCCACATCCCCGCCGCTGCTAAGGTCCAGGGGGCGCCAGGAAGGCGGCCTA  
CAAGGGCATACTTCTGCCCCGTCCACGTTCCCTCGGGATCCTTCGGCGGGGCTCATCCC  
CGGCCTATTTTTGCCTGATTTTCAGGCCTCGCCCTTCTGCGCTTGCCGCTCCTTAGTGA  
GCGCGACCGCTTCCTCGTAACTTGCTGCCTTGCCGCTAAGGAGCAGGTCCAACGCGA  
CCCGGTGCCTGGCGGTGTAGTAGATGTTCCCCAGCGGCAACACGGTTGCGGGCCGC  
ATCGCGGGCCCAAGGCTATAAACGAAGTGCGGCGAATCGGTCTCCGGCCAATGCGG  
GTCAAGGTCCTGGAGTCGATCAACGGTGTCTACGCGCTCAATGAAATGGACGCTTCG  
GAACTGCGAGAGGTAACGAAAGCCGATGTAGGCAGGCGGGACAGTGGGCCAGCCG  
TTGCCACCGATGGGATGAAAATACTTGCCCTGCTTCGTTACGACATCGATCCACGTC  
AGCTCTTGAGAGCTTGGCATTAAAGTCGCGGCTTAGAGAGACCACGTAGGCGAGCGA  
GTCAAAGGCGTTGGAGGTCATTCCATACTCCGATAGGTGCAAGGCAAGCTGGTCCA  
GCCACAAGCGTTCGATTTGGTTCCTGGTTCGCCGTATGAGCCCGCTTCGCCATGGCTC  
GGATTTCTGACCAGGAGAGGTGATCGACGGGGATGCCGTCAATGTCTGCGGGAAGG  
TGTCGCACGGCCCAGTCCTTACGTGCCGCGCTTACCGAGATCAGCCGCTTGTGCTGC  
ACGTTGGAGTCGGCCAAACGATTGACATACCTCGCAAGCTGCGCATGCGTGGTTACC  
TGCCAGTGCCCTCTTGGCTTCAAACACCAGATGGAAGGCCGTGCCTGAAAGGACCTC

AAGATCGGTGAAACCACGATCCTCCATCCCAAAGTTCTGGCTGGACAACGTACCTG  
CGCCAGTGGATCCAGGCCAGGGAACCGAAAACTCCGCCCCGAAGGGCAGGCGACT  
GCTCCAGGCACCACCCCAAGGCATAGGTGCCTGCGTTCTCATCGCAGCCAGCCAGTC  
CGAAGCAGCTGACGGGTCTGCCCCCTCGTATCAACATCCAGAGCCTCCCTGCGGTGG  
AGCAACTTTTTGCTCCTAACGTGTGCGCTGATGTTGCCAGAAGCCCTGGTTTTAAGG  
CCACCATTTTCCTGCATTGATTCTGCTCATTACCAGCGCGCGAAAGGCACCAGGGGA  
AGGCGCTGGCCCTGACCGCTTGTGGCGTCCCTGATTGCAGCGCGTATGCGCGGCCAC  
CACGTTCTCGGACACGTCCAAGCCGCCGTCCTGTGCTGCTACGAGGTGTTGCGCCGT  
GCACTGGTAAGGACGTGCTGAGCCGGAGCGTAAGCCCAGCTCGTTAGGCGAGGCGA  
GCCACATCGGGAGGTGCAATAGAAACAACAGCCCGACTGGGCGTGAAAGGCATG  
GATGCTAAGAAATTTGAGGCGCTTGTGATCATAGAGGGC

>CONTIG\_84\_length\_5578\_cov\_7.127866

CCGCTGCCGAGCAATCGGTGAACGCCTCCCAAAGGGATCTACACGCTTTCTTCTGAAA  
TCTGGAAAGACAGTGGCTCTGGCGTTGGGCGGATCGAGATTGCAGCGCATAGCGCG  
TCAGGGTTGATCGGGTCCGTCACGGTCTCGGCGGACTCGGGCAGCTGGGCGGCGTG  
GAAGAGGTTTCAGATCAGCATCAACGCGCCGGCTGGTACAACACGACTTGCCTGCC  
GCTTCATCGCAGAAAACAGCCCGGGAAGTACCTATTTCCGGCGCGCAAAGCTGGAG  
CCGGGTCTGGTCGCCACGATGTGGACCGATGACACGTCCGTGGTGGATCAGGCTTCG  
GCAACGCAATCGCTCGAAGCGCGGATGACCGTTAACGAAAACGGCATCGCCAGTTA  
CTACGCCTCCTATACCTGGGCGCTCGATGTCAGCAACAAGGTGATCGGCATGCGCTC  
TTTCAACAATGGGTTTATCGGCAAGATCACGTTCTCCGCGGACGTGGTGGAAATCAT  
CGGCGCCACACCGGGTGGCGGTCGCAACGAATTCGTCGGCGGGAAGTTCTACGCCT  
ACGCGCCCAACGGCCCGCGTGTGGTGGCGCTTGGCTACGGTGTACATGACCAACGT  
CCTGATCATCAACGACGCCGACACTGGCGTTGTTCTGCTGCAGATCACAGATCAGCC  
AGACTCGGATCTACTAACGCAGCACATGGGTGCGATCGCGATCGCCAGCGGCAGCA  
ATGGATCGGTGCCGGTGCCAGTGACCGGCAGCGCGAACCAGCTCTACTACTGGTTC  
GTGGCCGACAGCGGTGCGGGCAACAGCCTGCTTCCGTACTTCAGTGACGACGGTAA  
CACCATCAGTTGGGTGTCGCCTTCAGCAACGTTGACGGCGCGCGCAGGTGGCACGCT  
GTTCTACGGGAGGTTCTGATGGCCTACGCAATCTTTGAGGCCGGTCCCAACCGCGTG  
GCGATTTCCGAAACCTGGAAGAATCTAGCCTTCGCGTCCAAGCAAACCATTACGCCG  
ACAGGTGCGGGCGTTCTCAAGGCGTGGACCCTCACCATCGCAGGTACCAATCCGGT  
GCTGGCGTTCCTTGGCGAGAACAATGCCACGCTCGCGACTCGTACCCAGAGTGGA  
ATAGCTTCACTTTCACCGGCTTCAGCACCAGCGGCAGCTTCACCGCCTGTGTGTTG  
ATGAGCCGAACCTTCGGCCGACGGGACTATTTGGTGATCACCAACCCCGATACGGAC  
CAGGTGCACTTCGACGCGACGCTCAAGTACATGAAAGTGCGCGGGGCTGCTGCAAGC  
CAATGCAAACCAGGGCGGGTCGATCACCTTGCCAGCGGGCCGGACCTACGCCGCAC  
TGGCCGGCTCCACCGGCAACATCATGCTGGCTATCGGCGGCCTTGTTGGCGGCGGCC  
CGCAATGGCAGGTGCAAGTGCTGTGGCGTAAAGGTGTGGTCAACATTAACGGCAAT  
GTCGCATCCATCTCCGCAATCGATACCGCCCAGGATCTGCGCACAGGCACTAGCGGT

ACCCCGCAGCCACCCCCTGGCAACTACGGCCAGGCGTGGGTGCGCTCTCCCATCCTC  
GACGTTACAGGCTACTGACATGCTCATCAGCGAAAACCCACCTTCGGGACGCAGA  
CCAAGATCGTGTCGCCCCGCATCGAGATCCGATGGAACCCGGCCACCAACGACGGG  
CCAGTCGAGTTCCATATCGAGCAGATGACCACCAAGCCGCACCCCGATGGCTGGAC  
ACAGACGCTGGAGCGCTTCTTCCTGCGCGTGCTAACGGTGCCGATCAGCGACCTGAT  
CGGCCGCAGCTACGAGATCACCGCGCCCTCGACGACCGAGGCTGACCCAGCCACCG  
GCGCGGTCTGAGGTGCCGGGCGAGACGGTCACCGAGCCTGGCGTGTCATCTGCTG  
CTGGGCATCAAGGCGGCTACGCGCGCCGCTACGATGCGAACGTGGTGACGCCCCGA  
TCCAGATGCGGACCCGATCGCGCAGCAAATCACCATCATCTGGAACCCGATCAACG  
ACACAGGCAATGTGACCTTTCAGGTCGAGGATCGAGGCGCTACCCTGGGGGTGTTG  
GCTGAGTCGATCGCCGATCTGATTGCGCCGACCTACGCCATCCGCTATCCCGGAGCG  
GAAGCGACGCAGGAGCTGGAGGGATGGAACTCCAGGCGCTGATCAAGGCGGCAA  
CGGACAGTGCGATCGCCGCCAGTCTGGCGAAAGCCGAGCAGGCGGCGGCCTGACTA  
GCTGCGACGCTGTCTCAGCGACCGACGGCGCCAATCTCGCGCACGCCGGTGCGGTCT  
TGGAATTTGATGGACCACGGCGTGCCCAAGTGGACGGGCGCCACCGCTTGATCCA  
TTCGATAAGATGCCTGGGCCCCGAACTCACGGAGACGGCCATGGAGTGGATCAAGA  
TTGAATCCAATTCTGAGATGCCTGCTGAGGGAGAGACCGTCCTCACGTTGGATGGCT  
ACCGTCATTGGAGCGAGGCAGTACACAGATGCGCGCGCTTCTATTGGGACGAGATG  
CACGAGATTGAGGGCGTCACCCACTGGATGAGGGTTCGAACTTCCTGCCTGAGTGCG  
GTCAGGCAATTCTGACGCAACGCGTGGTGATTGCGCGATGGTGAAGAATGCTAGCG  
CCGGGCAATCTTTACCTGCCGGCCGCGGTGCCAAGATGGCCGCTACCCGCGAGGC  
GCCTGAGCAGCGTCTAGCCGGCTATCAGCGCGTTAACTTTCATTGCTGACCAAAAAG  
ACGGGGCCCGGCCATGCCGGCCCCGTCGCCCATTTGGGCTACTTCCGACGCGGGCGGC  
GACGGAGGTGACGCGTGACGTTCTCCAGCCGGGCAAAGCGCCAGCGGGTGTAGGAA  
CGTACGCGAACAGCCTTCTGAATAACCATGGTGGTCTCCTTGCGGTGTTACCGGAG  
AAGGAGGTTTGGGCCAAAGATGTCGCGCGCCTCCGCAGAATCACATCAACTCTGTTG  
ACAGAACTCTGGTGCAGCGTGACGATAGCCCGGTCGATTCCCGCCAAGGTAACGAC  
CAGACTCATCTGAGGCTTCGGCATTAGATCTCCGTAATCTGATGCCCCCGGCTTCAC  
GATCGGTTGCTGCGTCTGCAAACGCTCAACTGATCGAGTCTGTTTTTTAAGTTCGATA  
TTTAATTGCTACAAATTGACTCGCGCCGGTCTTTATGTGGTATGCCCCTGCGCCATGA  
ACCCAAGATAGTGGGGTGTGCGCGAGGGGTCAATACTAAATGTGGGAAAAGTCCGC  
AAACCCTTGAGGCATATAGCGCCGTCTGACGAACGGTGGCCGCCTGTCACCGAACC  
CCATCGATTCTGACTGCGCTGTCAAGGCCCAATCGGGCACTTTCTTGACGCCTGTGAG  
CTGCCAAGCGGTGGCTAGCCTCAGATAAAGCCGCGCATGTCGTTGGTTTTCGATCATG  
CCAAGCACATGTAGCCAGTGCGTCATAAGTTCGACTACCTCAGTTGCTTGCGCTGGA  
TATCTCGCAAGCAGGTCAGCCTCGAACGTTTCGACGGTCTGCCACGGGTCACTGGCG  
CCCTTGAGCTCCGTCTGAAGCTGTGGTCGCCGCCGCTGGTCACGATCGGACGATCAT  
CAACATCAAGCCCGAGCACGTCGACGCCTGGCTCAATCCGGATCCGCGCAACCTGG  
ATGCGCTGTACGCGATCTTCGACGACAAGCCGCAACCGTTCTATGAGCACCGGCTAG  
CAGCGTGACCAGCAGCAGCCATAACCAGGATAGATAGCCATGCCATCACGATCTGC

ACATCGCGCCGCGCTTCAGCGATCTAAGGAACCGGGCGTCATTGCTCCCGAAGGTGT  
GACGCTACCGGTTCTCCCTCGCGGTATGAACTGGAACAACCCTGTCATCGGCGAGAA  
AGTCGACCGGGAACAATGGGACGTGCTGCGTGTCGGTGCAGGGGATTCAGACGTCC  
TGGCAAGGGTTCGGCGTAATGGGGCGAGTGAGGCCGACGTGTCGCTGAGGATCGCG  
GGAAGCCCGGTGATACCGCCGGCGGTAAACGCTGCCTATCGCTCAGGCTTTCGCGGTG  
GCGGCTGAGTACGCGCGAAGTTTGTCCAAATAATCAGCTGATGTAGCTGAGATGCTG  
CAGCCACTCTGATCCCCTGCGCGGGAGTGCGGATCGCGCTGCGTTTCGCACGCTGTC  
TCCTAAGACTTCGACCGATGCAGCGACTCCGGAAGCAGATTTGTGTAGCGCTTGAGT  
GACTTCCAGTCGCGATGGCCGGTGACAATCGCAACTTCCGGAATGCTGTAGCCGCTC  
TCGAAGAGCCTTGACGCGCCTTCATGTCTGAGGTCGTGGAAATGCAAGTCTTGATT  
TGCAGGCGTACACACGCGCGCCGAAAGGCAGCGCCGACGCTGTCGGTCTTATAGGG  
GAAGATCACCGGCCCTACGCTCCTGGCGTTCGATGATGTCCACCGTGCGCCCCAA  
TAGCGGCACCCGCTGGTTGTTCCCGCGTTCCTTTCGCGGGTCCCTGCGGTCTCGAATC  
AGGATCGTTGGCTTGTGCCCCGGCCGGTAGTCTTCCCAACGCAAGGCCATGATCTCG  
CCCATGCGCATCGCCGAGTCGATCGCGAAGGGAATCAGGTCGCGCATCGGGATGGC  
ACCCAGGTTGAACCGAAAGAACGCGGCCAGTTCGTCCAACCTCTTCTGCCGTGCGCCG  
TCGGTTGCGCTCCACTGGTTTGGCGATGGCGCCGGCGCGGCGCAATACCGGCCGCGC  
GGCCGCCACCACGTCGCGGGATTGCCATGTTCCAAAGCGACCGGCCCGCCGCCAACA  
CCTCGCCTAGAAAACCGAGCTCCATTGTCATGGTAGCCGGGCCAGCTTTGCGCTGGC  
CGATATGGGTCAATAAGTCCTGGCCCGTGAGCGTGGTCACCTCCCGCTCGCCAAGTG  
ATTCTTCCCATCGTTTGAGGTTGCCGCGCTTTGTCGCGGACATCGGACGAACTTGCT  
CATTTCTTGGCGTACCGGTCGATCAGCGCCGATAGCGTCATGCTTTCCTGCGGTGG  
CATGGTTCCGCCCCGGATCGCGTCTCTGTCAGCCGCGCCCAGTCTCTGCGGCCTTT  
CTACCGTTAAAAGTCTTCGAGGCGGTAGGATGCCCCCTTATGCGCACGAGCGCGCGC  
CACTTCTTCCCCCGTTTCTCAATCAGTGCCACCTGGTGCAACCCCTTTGCTTGGTGC  
AGTGCGGGTACATTACACCGGGATTGAGCGTGAAAAACAGGGACTTAGCGGGAGTG  
AACTGCACCGCTAGTGCACCAAGGATTGCGTAACATGTTGAATAAAAAGGAAATT  
TGCTTTTCCGTTGCACCCATGATGGACTGGACCGACCGCCATTGCCGGGTCTTCCAT  
CGCCTGCTGGCGCCCTCCGCGCGGCTGTATACCGAGATGGTGCACGCCAACGCGGT  
GATCCACGGCGATCGCACGCGGCTGATCGGCTTCGATCCGGTCGAGCATCCAATTGC  
GCTGCAACTGGGCGGCAGTGAACCGGCCCTGCTCGCGCAGGCTGCAGCGATCACGC  
AGGAGTGGGGCTACGACGAGATCAACCTCAATTG

>CONTIG\_85\_length\_5557\_cov\_298.928361

GCTGGCCGACTACAACCAACAGATACCGCACGACAGCCTGGGCGGGCTAACACCCG  
CCGAGTTCCGTGAGCAACATCAACCGCAGACCTCTAGTTTTAGCTGGCATTGAATTG  
CGGGGAGTCGACACTCGCACGGCCAGGACGCTTTGCAACTGTTAGGTTGAAAACCG  
TCTAGCCGCCTTTCGTGCCGCACTGCTTGAAGGAGGAACAGTGCACATTGACTTTAT  
TGAAGTAGCAAACCTTTCGAAACTACTTGCCACAAGGATAGATATTGCGAAGGAAT  
CAACGGTCTTTGTGCGGCCAATAATAGCGGCAAGACATCAGCGATGGTTGCCTTAC

GACGCTTCCTTCTGGATCAGCGTGACTTCACCATCAATGACTTCACTTTGAGCCACTG  
GCCTGTCATCAATGAGCTCGGGAGTAATTGGGAAGCAGAGTCTGAAGACGGTGAAC  
CCATAGACTTCGACTGGGGCTCAATATCACCATCATTGGATGTTTGGTTGCAGGTTC  
CTGACAATCAGTTGCATTACGTTCAAAAGATTCTTCCAACACTTGACTGGGATGGCA  
GTGCTATCGGCGTGCGACTCCGTTACGAGCCGAAAAGCCCCGACGACTTCAAGCGT  
GAGTATCTAAATGCGAGATTGGCGACGAAAAAGTAATGGCAGCAGCCTTGGACCC  
GGACGAGAGCAGTGAAGACCCCTTCTCTCTATGGCCAAAGTCGATGATTGAGTTCCT  
GTCACGACGGCTCCGGTCGGTGTTTGAGGTCAAGGCCTATCTACTGGATCCAGCAAT  
GCTGGATGACCCAGAAGATGGATTGCGAAATCCTCAGGCGCTACCGACTGATAGCG  
AACCGCTCGAAGGCGACCCCTTCAAGGGCCTGATACGCATTGACGAGATCAGCGCT  
CAGCGTGGACTTGGATTGGCTGCGTCCAGTAATGCAGACCAAGAAGACGAGACCGT  
GCAGCTGGGGAAGAAGCTATCCAGTCAGCTTCGCAAGTACTACTCGCAACACCTCG  
ACCCTTTTGACCAACCAGAAGCGAAGGATCTCCAAGCGCTGCAAGCGCTACATCAA  
GCAAGAGTTGCATTTGGCAAGCAACTTTCAGATTCATTTGAATCAGCGCTCAAAGAG  
CTGAAACCGTTGGCTACCCAGGTTTGACAGATCCAAAGCTCAAGCTCGCGGCTGAT  
CTTCGCCCCCTTGACGCCCTCAACCATGGTTCGGCCGTTCACTACGAGGTCCCGACA  
CACCTCGCCGAAGTTGGTTTTTCCAATCGCTTGCCCGAAGACTCAAACGGACTTGGA  
TATCAAAATCTGGTCTCAATGGTTTTTTCGTTGATGAGCTTTCGCGACAAATGGATG  
CGCGTTGGGAAAGCCTCGAAAAAACATGGGCAGACGATGACAATATTCCGCCGCT  
GCACTTAGTATTGGTGGAAGAGCCGGAGGCACATCTCCATGCTCAAGTACAACAGG  
TCTTTATCGCACATGCCTACGCGGTGCTTAGAAAGCATGAAAGCCTAGGCAGCTTAG  
CCGGCTATCACACCCAGATGGTTGTTAGCACCCACTCAAGCCATCTTGCCACGAAG  
CTGAATTCACGTCCCTCCGCTACTTCCGGCGTATGCCGGTCAAAGCTATAAAAGGCT  
CTGTCCCCATCTCCCAGGTTGTCAACCTTCAAGGATATTTGGCACCCAGGACGACA  
CTACTCGCTTCGTGAAGCGCTATTTAAAAGCAACCCACTGCGACCTTTTCTTTGCTGA  
TGGTGCGATCCTTGTCGAGGGGCTGCTGAGAGGATAGTCGTCCCGCACATGGTGCG  
CTGCCGTGCGCCCTACGCGTATCTCAGGCATTGTTACATCACCTGGCTAGAAATCGG  
GGGCAGCCACGCGCATCGCTTACGTCCCCTTCTAACCAAACCTTGGGCTCAATACGCT  
AATCATCACAGACTTAGACGCAAAGGCTGATGATGGAACCAAAGCCGTTCCGGCTC  
GATCATCAGGACAGTCTTCACGGAATCAGACGATAAAAACGTGGGCTCCTCAGGAA  
GAGTCCATTGATCTCTTACTAGACATGCCAGAGACATCCCTCACTGAGATGCATGAC  
AGTGGGTTCGGCTTCCGAGTCGCCTACCAGCAGCCGGTCAAGATCGACTTTGGCGCA  
ACCAAAAATGCAGAGGCCATTGCTAATACGTTTCGAGGACGCGCTGGTATAACAAAA  
CATCGACTTCTTCAAGTCCTTGCAGGGTGGAGGTTTGGCTAAGCAAATCAGGCAGTC  
AATTGCTGATTCGAAAGACGTCACCGAGCTCTCTAGCAGCATCCAGAAGGCTCTGAA  
AAATGGCGACAAGGCAGAGTTCTCAATGACCCTATTAGAGAGCAGCGATCTGGACG  
AAGTGGCTCTCCAGACTATATCGACAAGGGCCTTCTATGGCTGATTGCTCAGCTCA  
AGCGTAAAGAAGATGATGTTGCTGGCAAATTGCCACTTACACCAACCTCTCCAGACG  
ATGCGGCACCGGCAACAAGTGAGGTGAAGCAATGAGGCAGGCTCAACACTCTGACA  
ACAACGATATTGATCAGCCGGCCGACATCCTGATTGCTCAATGTCTCGATCCAACCA

ACCCAAAAAGCTTCTTCCTTTTCGCTGGTGCTGGGTCCGGGAAAACTCGCTCGCTCG  
TGGCTGCATTGGAGCACGTCCAAGTCAACTGGGGTGAGCAGCTGCGCCGCCAAGGC  
AAGCGAGTTGGGGTTATCACCTTCACCAATGCAGCATCCGATGAGATCAAGCGAAG  
GATTCAATTCGATTCCCTTTTCGACGTGCGCACAATCCATAGCTTTGCTTGGTCATTG  
ATCGAAGGGCTTAACCAAGACATACGACATTGGCTAAGAGAAAAAATCGCTGATGA  
CCTTGTTGACCTACGTGAAAAAGAAGCCAAGGGCCGCGCTGGAAAGGCCTCAGATG  
ATCGCAAGTTAAGAATCGCAGCAAACACCAAAAAGGCTAGAATCCCTCCCCGGGATA  
AAGCGCTTTATCTACAGCCCGACTGGAACCAATCGGACACGCGATGCACTGAACCA  
TGCCGAAGTAATCCGCATTGCTGCTCACTTCTTGCAGTCCAAGCCGCGGATGCAAAG  
CATTTTTGCTGGGCGCTACCCAATTCTTCTTGTCGATGAGAGCCAAGACACGAATAA  
GCATCTGGTTGACGCACTGTTTGAAGTGGAAGCGCAGCAGACAGGTTTATTCTCGCT  
GGGCTTAATTGGTGACACGATGCAGCAGATTTATGCTGATGGGAAAGAGGGCTTGG  
GAACCGACCTGCCCCCCTTGGGCCACGCCGGGCAAGCACATGAACCATCGCTGC  
CCGAAGCGCGTTGTAAGTCTGTTGAACAAAGTTCGAGGTTCTGTTGACACTCATCAG  
CAGCGAGCCAGAACAGATGCTAGCGAAGGAGTTGTTAGACTCTTCGTAGTTCCTTCC  
GCCGTCCAAGACAAGCCAGGGGTAGAGGAACGAATTGCGGACTTGATGGCTAATTT  
GACAGAAGATGCGAACTGGCGGCGACCCGAGGCGGTAAAAACGCTGACTCTTGAGC  
ACAGGATGGCAGCCGCTAGGCTCGGATGCTTGGAAGTGTTTCGTCGCGCTGTATGAA  
ATTGACTCAACGAGCCTGCTAAATGGCACCCAGCCTTTGGCCACGTTTTTTACGGAC  
CAAGTTCTGCCACTGGTCAATGCGCACCCAGCGCAAAGATAGATTTGCCGTGATGCGG  
CTACTGAAGTCGTTTTACCTCTGTTGACGGCGGAGAAGCTTAAAGGCTCTCCTGGT  
CAGTCGAACCTTAGAAATGCGCAGTCGGCAGTGGACGAGCTGCTTGGTCTTTGGGCG  
GATGGTCAAGACCTTCGCTTCAACAAGTTCTCGTGTGTGTTTCCGATCGCCACTTGC  
TCGAAATTCCTGAGCGTCTTTTGGCTTGGGTGTCCCCTTCTGATGGCGTTCTTCCCGT  
CCAAAAGCCTCCGGGCCAAGAAGAGGAAAGCATCGACAGTGAGCGTCAGAAACGC  
ATTGGAGAGTTACTAGCCACTCCATTTTCGCAAGTGGGTCCTCTGGCTGAGTATCTTT  
CTCGAAAAGCGCGCTTTGACACACACCAAGGGGTGAAAGGATTGGAGTTTGAACGC  
GTCATGGTGATCATGGATGACCATGACGCGCGGGGCTTCATGTTCAAATATGAAGAT  
CTCTTCGGGGGAAAGACAGAAGGGAAAACCTCTAGAAGCAACCAGGCGGCTTTTTTA  
CGTAACAGCTAGCCGCGCGACGGAAAGCCTGGCGCTCGTTGCCTATACGGAAGACG  
TTATGCGCGTCAGGAAGTTCATGCTGGACAACGACTGGTTCTGCGATGAAGAGGTG  
ATCACGGCTATTCAATAGCTGGGAATCTGAAGTAGCTAGCTGCTAAATCTGTCAGAG  
CCGTTACTACTGACTCAATGAACCGGCCAACAGCAGTTGGCCGAGATGAAAGTCCG  
CGCTGAGTAATCTCAGCCACTTAGCTTTTTTCAGAGCTGCTGAAATCTTTCATGAGCT  
TGA TAGTTCTCCCTGCTTCTCGGGAGGGAGTTGCGCCATTACCAAAAATGGCCTCAG  
CCATCGTGTGCTGACAGCGTGGAATAGGCCACGGGCAGCTCCAACGCCTCCGCC  
AGCTTTGCCATGCTTTCGTTGTCAGGCATGCGGTCCCCTCGCTCGTAGCGCGAAATC  
CTGGGAGCTGCCGAGTTCTGTTCCCTCCAGCCCGAGAACAGCCCCCTAAGGCGGCTTGG  
TTCATGCCTCGCGCAAGCCTGGCCTCTCGAAGACGACGGCCAAAGGTGGATGCGGG  
AGGCAGCGGAGCAGGCATGAAGACCAACGAAGGATGAATTGACCCCCAAGTCTGCC

GCTTCCAATCCTGCGCTGCATTTGCCATATTTGCAAATACGCCAAACGGGCGGTATT  
GCAGGGGTTTTCGATGAATCACACAGGACAAGGAGCGTTCACCGCGCTCTTGCGT  
TGACGCTCGTCTCGCCATTCACCACCCACGCCCAGGATGTTCTGCGCAGAAGCCCCG  
GCTTCTTCCGCCAACTCGGAAAGAGCCTGGCAGACTCGGGCAAGCATATGGTCGGC  
ATCAAGCCGAACGGCGGCAGCAAGGCCGGCAGTCAGGGAACAGGCTCGATTTACAC  
GCCCCGTTAGCGGCGCTGGGAAGCTGCCCCGGACTCTTCAAGGGCGACAATCACCAAG  
CGGCGCAGGGCGGGAAGCTGGAGTGGCCCCGGGTGGCGCTCACGTTACCGAATGG  
GGAGCCTCGTTGCCATGCTGGACAGTGGAGGCCCGCATCTGGACTAGCCCCGACCGC  
CTCGAGTGTGAGACCTTCCGCACCTGCTTCGATGCCGCCGTGACGGAAACGGACG  
ACCTGGGCGAGACGGCGGAGCTCAACAGCGCAGCGCTGTGGAAAGGCCGCGACTCG  
CTCAACGGCATCCGGGTGCCGCCCAACAAGTCAAATACGGGCGCTCAGCGCTCCAC  
GGGGCCTAATCCCCCAGTGCAGCCCTTCGTGGTCAACGTCAGCCGCCCTCGCGTCGC  
TGATCGCGCCGT

>CONTIG\_86\_length\_5544\_cov\_79.209341

TGCCAAGACGTCGAAGATGTCCCGGCTTGCGTCCTTCTCGGATCTTCGGGATCTCGA  
GAAATCTTAACGCTGTGGTCAAGCAACAACGCGCCTTGATTTGGCGGAGAGAGTG  
GGATCGGATCACCTCCGACCTAAGCCCTTCTCACCGTTGCAGAAAGCCTGCGTGGCA  
GGTTTCCTTTCAATGTTTCCTCGATCATAGCCTCCACATCGGACCGATTGCTAGCGCT  
CGCTTGCTGTTGCAGTAGATCGACGCTAACGCTGACTGCCTGCGTAAACTGACGTAG  
CCATATCACTACCGAGTCAAGGATGAGCCGCCCCCATCTTTCCAGTTCCATCGATCA  
GCTCGAGGAGCTGTTTTCAACCTCCCAGGATGCCCCCAGGTCCTCCTGGCCATAGC  
TACCGAACTGGGATTTAGAAGAACGGCCCGAGCCAAGGAGCTTGAGATCGAGGTCA  
TGCAGACCTTGGCTCGCTTGAGCCCCGGTAGCTGGGCAAGAACGTCCTGCGCCACCAT  
CGCAGGCTGAAGTTGCCACTGGAGACCGGGAGCGGCCCTGGTCTCCACCTGACTTGT  
CACACCTCCCAAAAACCTCATGCCAATCGCCCTAATGATGTGCTCGCTGCATGGTCTG  
CGTTGGAAGTGCTGTCACCGCAAACGTATGACCGCCCTAGCGACCTGGCGAAGGGG  
GACCGCGCCATCGTTTCCATCAGCAATGGCCACCTGCCTTGGGACAGAGGCCCTGCG  
AGCTCACGACCCAAGCAAAAAATCTATTTCCATATCGTTTTTGGCGACCATTCTGCC  
GCGCCCCGCTTTTGCTGCATTGATCGACCGCTTCAAAGACTCCCGTCTTGAACGCCCG  
AGCGTTAAAGGTGACATTGTTCTTGCCCTCGTTGCTTGTGGACAAGGAAGGAATACTT  
GCTGGAGAGACACCCGTCTCGCTGTCCGCGTTCGGATGGGGCTTGCCTGTCGCCCTG  
GGAGGATCGCTCAAGGACCTGGCTGCCTGGACCCAACAAGAACCGCGGGCTGATCGA  
AGGCCTCACCAAGCAGTTGGGCGTTTCATCAACAGAGACTCCAGTTCCACTGACGTG  
GGAAGCGCTCCAACGCGCCTCCTCCTGGCTGGTAGACACCCTTGGGTTATCCGGACA  
CCAAGTTAGCGGTCCGACATTCGCAGTCGCTCATTACCTCCACTACACGTTGCGGAT  
TGTTCCAGATCCTCTTCTTCTCAATAGCTTTTACCTGCGCGACTTGGCCAAGGCACGA  
GAGATCGCCAACAAGGGCGAACTCCCAAAGGCGTTGTGTCTCTATCTTGGCAGCCA  
GAAGCCAGCAGCACGACGGGACTTGTTGAGAGACGATGCCGCCCTGGAAGCTTCCT  
TGGCTCCAGCGGGTGTACCGCTCGGTGATGGCCCACCCCCGCATCGCATACCCCTG

CCCTGTTGCAGCAGGCTGCCGTCAACTCGGCCGGGCGCTTGTCGGGTGGCTCCGGGA  
TTTTGGGTGTCAATGGCCACCTGGGACGGGGAAGAGCACCCCTACTACGGGACATC  
GTGGCGGATCTGCTGACTCGCCGGGCCACAGCTATGTGTGCGTTCACCGACCCAACC  
CAAGCTTTTAAAGTGAGTTGGACGAAGAGAGCCAAAGGGGAGACCCAGGAGCTTCA  
CGCGCTGGATGACAGCTTGCGTGGATTCGAGATGATCGTTGCCAGCTCGAACAACA  
AGGCCGTCGAGAACGTCAGTGCAGAAATGCCATCGCTGCAAGCGATCCCCGGCGAT  
TCCCCTCTGCGCTATTTTTCGCCATTGGCGTCTGATCTACTGGACCGGGACGCATGG  
GGGTTGATGACAGCAGTCCTCGGCAATGCATCCAATCGTTCCGTATTCCGAAAGAAA  
TTTTGGGGAGACTCGCCACGCTCCCTTGAACGCTACCTCAAACAGGTCAGCGGCATC  
GCACCGCGTGAAGACGGGTCTCCCGAGGGCCTGGCCGAACCTTTGCAGTGCGCCATC  
TACTCCAAAGGAGGCCCAAGACCGCTGGGAGCATGCTCGAAAGCGTTTCAAGCAAC  
TCTCCAGTGCCTGCTCCACGCGGTTGTCTCAGCTGGAAAGCTTGCGACGCGCCTTGA  
TCCAAGTGCCTGCTCCACGCGGTTGTCTCAGCTGGAAAGCTTGCGACGCGCCTTGA  
TCCAAGTGCCTGCTCCACGCGGTTGTCTCAGCTGGAAAGCTTGCGACGCGCCTTGA  
GGCATCCAGTCATGCAAACCAGGCACAGTCGCTGCTTGCTGCCTTGGTTCGAGATAC  
ACAGACCGCAACTTTGGCGCTACAGCTGTGTGAGACGGCGCTGTCCGATCATGCGC  
AAAAGCGACCTAGTTTTTTTCAGTCTAAGGCGTCTTTTTTGGTGCCCAGTCCGCCAAAT  
CTTGGGAGGTCACGCATGGGCCTCTCAAACATCAGGCTGACATCGCAAAGACGGCG  
AAGGGCGTCGCTGTAGAAGCCCAATCCAAGGCAGATGGTTTGGCGCGGGCAGCTGG  
GCAGCAAGCATTGATTGCTTCACAGGAACTCGAAAAGGCCCGTAAGAAACGCGAAG  
CGACGGAGCAGCAGTGCCACGAGGTGCAGATCGGCGCTGGAGCTCACGTGCTGGAC  
GATCATTTCTTTTACTGCCACACGAGCAGAAGCAGCTGGCCGTGCCCTGGCTGGAC  
AGTGAGCTACAGAAGCTTCGAATGGAGGTCTTCGAAGCAGCCATGGAAGTGCATCG  
GGCCTTCATCGACGCAGCAGCAAAGCCCCCTTCTCCATAACATCAACGCCTTGGTCGG  
AGGAAACTTCAACATTCCACCAGACCGACAGCACTTGAGCGGACATCTATGGAGCA  
GCTTGTTCTTGGTCGTGCCGGTCATTTCAACAACGTTTGCTTCCGTCGAGCGAATGTT  
GGGACGTCTTCCCCAGGAAACCTTTGGCTGGCTGCTGGTGGATGAAGCAGGGCAAG  
CGACGCCGCAAGCAGTCGTAGGTGCCCTGCTTCGATGTCAGCGAGCAGTGGTCGTC  
GGCGATCCGCAGCAAGTCGAGCCAGTTGTTCCGCTTCCTGACGTGCTGACTGCCGCC  
GTCCTTCGCGAGTTCGATGCTGACCCAGACAAATTCGGCGCCCCGAATGCGTCGGTC  
CAAACCTTGGCCGACGAGGCTGGCGACTATTGCGCCACGTTTCGATACGGCCGGCGG  
ATTCCGAACGGTGGGATCCCCCTCCTCGTCCACCGTCGCTGTGCTTCGCCGATGTTT  
GACATTTCCAACACGATTGCTTATGGCGGGCTGATGGTCCAGGCAAAGCCTCCCAAG  
GGATCAAACATTCGAGATGTCTTGGGCGCCTCCCATTTGGATAGATGTGATTGGAAGT  
GCGCGGGACAAGTTCTCGCCTGATGAGGGTCAGCAGCTTCTGCTACTGCTTAAGACG  
TTGCGAAACAACGCGATTCTCCCTGACCTCTACGTCGTCACGCCCTTTGTCGCCGTTT  
AAGATGGCCTTCGAGAGATGGTGAAGCAGGACGGCGTCTTGCAAGGCTGGGTGGAC  
AATGCCTCCAAGTGGCCATCAGAGCGGATTGGCACCGTCCATACCGTCCAAGGCAG  
AGAGGCGGAGGTCGTCATCATCGTTCTGGGGGCCCCGGATCCTGGCCAAAATGGTG  
CCCGGCAATGGGCCGTTTCGACGCCGAATCTGCTCAACGTCGAGTCACCCGAGCC  
AAGGAAGCCGTTTACGTGATTGGGAATCGCTCACTATGGTCTGGCGCCGGGAAATTC

AGTGCGTTAGATCTAAACTTTGCTGAGCGAAGCGCTTGAGGCTTGGTCTTCGTGGA  
CGTTGGTGCCCCGCTCCACGCGCCCGATGAGCAAACCAGTATGGACGCACGGATTA  
TTTTTTAAGGGGAACGCGCAAAGATGAGCAACCCACTACTTCCGCATGAAGCTCGCG  
TGGCTGTATTAGTCGACTGCGACAATGTGCCAACCGACATCGTGGAGCACGCGTTGC  
TCATGGTGGCCCAGTTCGGTCGGGTCGTGCTGCGGCGTGGCTACGGTAACCACAACA  
CCCTCGCCAATAAATGGCAGGAGGTCCTGGTCCGCCAAGCATTACCCCCGTGCCTTC  
AATACCAATACGCCTCCGGCAAGAACACGGCTGACATCGCCCTGGCGCTAGATGCC  
TTGGAAGCACTTTTCGATAGCCGGGCGGACACGTTCTGCCTGGTGACCAGCGACTCG  
GACTTCTCCTACCTCTGCCGCAAGCTCCGGGAGCGCGGCGCTACGGTCTTCATCGTG  
GGCGAGCCCAAGACCCCGGACGCCCTGCGCAATGCCTGCGACCAGTTCTTCGAATG  
GGACCGGACGGCCAAGGAGGTGGCGGCACCCGAAGTCCAGGGCAATGGACTTCCTG  
TCCTGAAATCGGAGGCAACGAAAGAGGAAGCGCCCCGCGTAGAAGCCAAGCCACT  
ACCCAAGCGCCGCCCGCGGTTCTTGGTAGAAGCCGTGACCCTGCTGACGGGTGACA  
CCTCCGAGGGCAAGGTAGGACTGTCGGCGCTGGGCCAATACCTCAAACGAACCGAT  
CCATCCTTCTCACCCAATGTCCACGGCCACTCCGGCTTGCTCAACATGGTGAAGACC  
TACGACCTGCTGACAACGCAGCGGGAGGAGACGGGCGATTGGTCGGTTAGCATCGC  
GCACAAGCCAGAGCCCGCCGATACGGCGTGAAACGCCTCAGCGGACCTCGTGCCTCC  
ACAAACGAAAAATCGGGGACACCAACCCAGTTGGAAACGCCCCCTATTATTCAAATG  
GCATACCTGCAATCGAATTTCTTCGCGTATTCAAATTTGTGAAGCAGGGCTCTAAGC  
GAGCTCTTGCGTAAGAGCAACTAGCTGCTTGGATGAGTGCTTACCCAACACAGGAG  
CACCCATGCACCACCAAACGCAAATCCAAGTCGCTAGCCGCCTCCTTGGCCACCTCC  
TTCAGCAGCGCACCCACGCGCCTTCCCCCTAACGAAGTAGAGGACATCCAATACGCG  
CTCGACTTGCGTGCCGAGTTGCTGAGGCTCGGCGGGGCCAGGACCGGCCAGTCAAAC  
CCAGGCGTCAGCCATGGCACCTTCTCAACCCATCCTCGTCAAACGAGCGGCCGTGGA  
TCGCAGCGTCGTGCCGACCATGCCCCGCGTCAATCGAGGAGTGGCGAGAGGCCCGCA  
AGAAGAAGAACAAGACAGCGTCCCCCGCCCTAAAGAGCCCATTGGGATTGAACGC  
ATAGACCTGCGTCCTCGCCCTCGCGCCTGCCGCTAGGGCACAAGGAAGAAAGCCCC  
GCATCTGCGGGGCTTTCGATCCATCAGGGCCGCGGCCGCGCCGTGTTGGTTGCGGC  
ACTGGCATCGGCGCTAGCGCTGGCATCGGGGAGAGCGTGGGCACTGCTGGGGCAGC  
GTTGATCGGCGCAACAGAGCGAGGAACGGAATCGAACTCTGGACTGGCAAGCATCG  
CCTCGCTCCACTGCTCCACCTGAGCGGCGCGGGCCTCGATTTCAATTCTCGTCGTCGTT  
CCACCGCTGCTCGGAGACCGCTGCCCCGGGCTGTCGCCAGTTCGGCTGTTTCGCTTTTC  
CAGCACGGCCAACCGCCTTCCTCGTCGCTTTTCCCATTCCTTGAGAGGACCACTCGC

>CONTIG\_87\_length\_5340\_cov\_304.660848

ACTCAAGATAGTATATCTAGTATAAATACCATTGAAATGCTGGCGCTGAGCAATCAA  
ACAAGTCGACATGCAAACCTGCGCATCTCTCAATGTCTTCTAAACCCACTCACTTCGG  
AAGCTGAACTGCTTGATTAACATAGAGGGCTTGACTCAGGCTGCCCATAGCACATCC  
GTACTATTGAACCCAGCAAATCAGGTGGCTATTCTTTTGAATCATCTTCACGACTGG  
CGCATCTGGACCATAGCGATACCACGCTGCAAAATATAGAATTACAAGAATCGTGA

TCAAGAAACTGATCATCAGCCAGTCTTCGATTTTCTTCAGCCATTCAGATGAAAATG  
AGGAAAAAGTTTTTCCCTCGGCAAGAGTCATCTCTTCAGGTAACTCATACAGTGCAG  
CAAGTTCTTCGTTTCGTGGCGCCATGGTCACACCGCATAAAGTGAGCAATAGTGCAT  
AATTCAACCAGTTGGGGAATTGCCTAGGAGGAAGGCCTCAAAGGATTTTCGACCTCG  
CTCTCCTGAAGCCAGCCAGCAGCAACAACGTTTCGCTTGCGAGTGCAGGCTGGGG  
TGTGTATACGACAATCGCCAGGCTCTTTTCAGCCCGACTACATGTCACGTAAAGCAG  
CCTACGAGTACGTGCTAGTGCCTTGCCGTCACGCTCGTTGTCCCGGTTCAGTC  
TTTGTTGGTTCTTTTACACCCAGCAATTTGTCGTAGCTGAATAAGAAGCCGCCTGCCT  
CCTCATCGTTGATGACGACCATGACTCGTGGAAGTCCAGCCCCTTTACCCCTTGAT  
GTGTACCGTAGGGTGAAAGGCCATCCGCATAACTCGCAAAGGCTGCAAGCTCCGAA  
AATGGACGCTCAAGGAATAGCTGGTAGGCGTAGTTGGTTCATCGCGTTTCGTATCTTCA  
GGATCTGGAGCCTCACTAGGGGCTCCCAGCACCATAGCCCCAACCAGATTATCAGG  
CACATCAAGCAGTTGGGTTTGCAACAGAAGCGTTGCGACCTCGCTCAGTGTTGGATC  
GTTTTTTTCGAAAAGAGAGAGCAGGGCATGCGTCGCGTCCTCTACACGTTGCATGTG  
GGCCGATTGATCCCCTGTTGATTGCATTGCATCCTTGCTGAGCAACGGAGAGCGAGA  
GCGTACGGCTTCAAGCACAAGGAAGTGATCGTCCTTTGCGGTAAGAATGGGAAGAA  
CGCCTTCGCTGAAAACGCGAAGTGCGGGCAATGTTCCATCCAGCAAGCCTGTTTGAA  
GGTGCTCAACCCCGTATAGGGGCGTGAACAGCTTTTCGAACCCCATCCGCCGTCCAG  
CCATCTTATGTTTCGAGGATCAAGGTTTTTCGGCCCGCAGAACCGGTAGCCCATTCGC  
CGTCGTCAGTGATTGCAGCCATCGACTGAGCGATGCCTTCCTCAAGATTTGGTGCCT  
GTTCTTGGCTTTGACTAATGCAGTACATGCGCACCAACCTTCAATGGCATCGGGCT  
TGGGGGTCTGCTGATGAGTGTCTGCAGTGCTTCGAATCACGTTGATAAGGTCTACAA  
CCCTACGAGGACAGCGGCGATTAACGACCTTTTCAGGTTTCAACCAGTCATCCGGTA  
TCGCTTTGTCAAGGCGCGTTACTCCATGGCCGTAAATCTGTTGCATGGTGTGCGCGA  
GTAGCCCCAAGCAGAAGCGAGTCTTCGCCAATTGCTGGACCTTCAGAAAAGCCTCC  
ATTACTGGAGCGTGGGTGTCCTGACTTTTCGTCGATCAATACGACTGGGTAGCGGTCT  
ACTAGAACATCCAGCAAAGGGCGTTCAGGAACGAATGCTGCAGTTAACTTGATGAT  
CTTATCGTGATTGAGTGCTTGCCGCTCTCTGTTGTGCGCAATGGGGCTGTAGATAAA  
CTTCGTAATCTCGTCGAGATTCTCAAGTCTGCGTCTCTTGCTTTGTAGCTTCCGTCTG  
TTTGCTCGAGATGTTTTATTGTCGCCTCTCGAACGTGCTAGCTCGCCCTCGATCTTCT  
CAATGTCCTGGGGAAGTTTGATCCTTAGCCATTCTCTGATCTCATTGTCGAATCCTTG  
GATTAGGCGCCAGGCGAACGCGTGAATGGTTGAGACTTCCACGAGTGGATCAAAC  
CTAGCCTCCGAAGAATCTCATCACAGGCTGAGTTTGTGTAGGTGATCACCGCAATGC  
GTCTGCCCTCGAATGTCAGGCGTTCTCGCTCGCGACCTTTGAGTTTCGCGGATAGCTTC  
GACGAGTGAGTGGGTTTTTCTGAGCCAGCACCTGCGTATAGAAAAAACTCTTCGG  
GTCTGCCAGATTCAGGCAAGCCTGCATAGTGTGCTCGGCATCTGCGATAACTGCCTC  
GCTCATGGCGTCACCTCCGCGCACTCGGGTGGAATTACCAGCAGCTCTATTTGCTTG  
CTTCGCAATTTTCGACTCAAGCCAGTTGAGGCCTTCACTGATGTATTCAGGGATTTCA  
AGGTTGGGGAAGTTCTTGTCGCCCCAAAACGAGCAACACAACTCTGCTTTCTTTCCT  
TCGCGTAATTCGTTGAAAAAACCTTCTCCGACGGCTTCCGATGTTTGCGCTTCATTCA

AAACTTTTACGAAGGCCTTCATCATAACCAGTGCCGTTTGTTTTTTCCGCAAAGTGACC  
GGCGTTGCTAAGCACAAAGCTGTCTTCAAAGGTATTTGGTAGGGTTTGTATTGCTTT  
ACCAGTAGCGGGCAGGTGGGTGGAAATAGGAGTTTGATAGGCGATGCGCACCGAGT  
ACAGGTCGTCGATCTGGTGCTCTTTTTGATTCGCTGGCAGCTCAAGCAGCTCATCCA  
CTGTACTGCCCAGATGCATCAGTTTCATCCAGCTCCGCAATGTCGGATTGTTGTAAT  
CTGATCTGCGTTTCTTTGCACCGGTTTTGCCGCTTTATTCAACCCTGCATCGAGGTCT  
GTAATAACCAGAGTGAGGATGCCAAGCGCGTCAATTAAAGGCCTTAGTCGGTGTGC  
GTGACTGCCACCGATATCAAGGGTTGTGATGTAGCAGCGGTCAAGGAATGGAACT  
TATTCCGCAAGAAATGCGGCAGCATCATTCGCTCTGCTGAGCCCTCTACCAAGATGG  
CGGCGTCGGCGAAGAATATGTCTGCGTGCTGTGCCCCGTAGGTACCTGGTTACGAACT  
CCTTCGTCTTTGTTCCATCGCCGAACACGTTAGAGAGGTTAGACACCGTCGACACCG  
GTACGCCGATGCCATACATCCCTGCTGGGAGTCGCCTGAAATACCTAAGATTCTGGT  
ACTCCACTTCATGAGTTACATGGCTGGAGTGCGTACTCACCAAAGCTGAGTCTTCA  
GATTTGGGTAGCGTTCAAGCAAAGCGTCTCGGCATAGAAGTTGGTAGGCGTGCCGTA  
CGAACACTTGCTGCACTTGAACATGAAGGTGGGCTTCAGGCTCTTCAATGAGCACGA  
GGTGGATGGGCTCGACGCGGTCTATTACCTCCGCGCTGGCGGCCCTGGTTTTTCTTA  
GCCACTCATCCCTAAAACCCATCAGCCGGAAAATCATGGATATCAGGTTTTGATATC  
CCAACCCGTTAGCGGTCTCAGGTAAATGAAGAGGAGGGGCTCCCGGGGCGCCCTGA  
ATTGAATCCAACCTCAAAAAGGACGGCAGCTTCATGGTTCATGCCGTCGGTTGCTGCT  
AGGCGACTTGCGACTTTGATGCGTGGGTCAATTGCGGCCAGGGTAGCCCAATCCCTCG  
ACCTCTTTAATAGCAGATTCGAAGCTGCTACTTAGCCTGGTATCGAATGCCGACTGG  
GCTGCTTCTATCGCCCGCAACGCTTCGAGATCTGAGATATCTGGGCTGTCACCTGGA  
TCTAGGTGTCGGGAGTAATAGGATCTGAGTTGTTCCGAGAGTTTTCGGGCACCGCTG  
GGTCTAGTGTTATCGCCTTGATTGTCGTCCGAATGGTCGCCGAATCCCCGCTGTGCAT  
TGATCTCGTGTACTCGAATTAATCCACTGAGGGGATTGCTTTCCAGAGGCAGGGAGG  
TAGGACTCAATTGCTGCATTTGAGCCATTCGAGTCGACTTGTGAGGCTTCTTAAGTT  
GTTGCGGATCTAGGCGATACCAACGAACCTTGAATTTATCTCCCAGCCTACGGTTCA  
AGTAATCATGGAGGCTCTGTGGCCATAGCGTCAGCGGGCTACCAAGCGGCTCCTCCT  
TCCCTAAAGCATCCTCAAGCTCTGCAACCCTCGCGCGCTCCTTGCGATAGTCCGTGT  
ACAGCATATTCATATCATCTGGTTCAAGCAGGAAACGCATTCCCACAAGCCCCCGC  
GCCACGCAAAGCTGGGAATGAGATCGCGGATGAAGTGGAACCTCTCCTTGATCTGCC  
GACACCCAGATATCCAGACTAGGGAGCCAGTCGGCCCAGTCCTTGGCTGTAGGAAT  
TTCAAAGTTTGCTGGTGGGTTCTCCCACTCCTTACCAATCTCGTCAAGCTTTGCGAAA  
TGACAAAGAGTCAGATCCTGGAGCCGAAAAGCAGATCCCTTCGAAACCAAAAATCT  
CCGGAGTGCCAGCATGGCAGATGATTTGCCGCTGTTGTTTGACCTACAAGCAGCGT  
GGTCTCATTAGCGAAGTCAATTTCGCACAGAAAGCAGCTTTCGGAAGTTAGATATCTC  
TACGTGCTGAATGCGCATGGATCGTCCTTGAAAGCCTGAAGAGTGTGAGTTTGCTAT  
CAATATAGCTAGCTGCCTATAACAATCAAAGAGAGACCTGATTAGCCCTGACCTTCA  
GCCGCTAGTCGCAGGATCTGCGCGGGGCTTTGTGGATGCTGCTGTTGCCCTTGCCAC  
TCTAAAGTATACGGATGAAGCCTCGTAATCCTTATCCGACCGACATTTCCGAAGACG

AATGGGCCTTTGCTGCGCCGTATTTGACACTAATGGATGCGCAGGCGCCACAGCGTA  
AGTAAGCGTTAGACGCGATGTTCAACGCACTGCGCTGGATCGCACTGGCCGGCGCA  
CCATAGTGATTGCTTCCCAACGATTTCCACCTTGGGAGGCGGTGTATCAGCAACCCC  
AAAGTTGGCTGCAGAGTTCACCTTTCCTGCGGGCGAACATACAAAGGTTGCGTGTTCA  
CTTCCCACTGGCCGATGCGTAGGAACCCAATCGCACAGAAAGGCAATGCGCGATCC  
ACATCGCGAACAGGAGCGTGGTGGTATTCCCGCAAAGTCTCAGAAGCATGTTTCTGA  
GTCAGCGGGCGATGCCCCGTCAAGGTCTATAGCCCCACTTCGCGATGATGGCTTCCAA  
GATGGCTTGATTGCGGTGCAGTCGCGCCTGGACATGTCGTCAGATATACCCGGCGTG  
CGCCGCCGTGGCCGGCGGGTTGAAGGCCGGGCTCCATACCTGGAT

>CONTIG\_88\_length\_5334\_cov\_18.023430

ACAAATCCCAATAGCGCAGCGCTCGGGAGCAAGATGAGCAGCGGGTGGACTGAAAT  
CGGTAGCGCCAAGTAGATCACCCAGGGCAGGATCGCCAGCGGCATGAGCGAAGCCT  
TGGCGCGGTGGTAGATGAAGCCCGATTCCCGACCAGCGCCGAACCTTACGTACATCG  
CGACGCACCAAACCGTCCACGAAACCGACGAATGCCGCCATGACGAATAGCGGCAG  
CGTCAGCACCAACACCAATAGCCGGACCAAAAAAGTGAGCGCTGTAAACGCTGCGG  
CGATCAAGTAATTCTCCGCCACACATACACCTGGCTGATGTAGTAGCGAAAATCCC  
GTGTCCCAACCTTGCTAGGGGCGCGGGCTCGCTCGGCAGTTTGCTCCATGCGCGAGA  
GTAAGCCGGTGCGAAGGAATATCCAGCGATAGCCCGTCTCTACCAGTTGGTGCGCG  
GAACGCCCAGGTTTCTGGATGACCGCACTACGGGTGAAATGCTTGGACAGGTGAGT  
GAGTTCGTACTGCAGCATCTCTTGAGAGTGCCGCCATCCTTGCTCCTTCCAGAAAA  
ATGCATGCCACGCATTCGATCACAATCGAAATCAGCAATGACCCAACAGTACAC  
CAAAAAGCCGGAACGGCAACGTAATCAGACCAACCAGCAGCCCGTCACGACGAGC  
CTCCTGGCGCTTTGCGGTACTTGCCACGTCGCTCATGACAGCGGCTCGCGAACTACC  
GCTGCAGGCTCTGCTGCATCGTCTACCAGACTGTCGGGCAATCCCTGACTCTGCAGG  
GTAGGTGATCCAGAGTTTTCCCAACATTGGGCGGAGTCGCTGTAGCTCTGGCGCATG  
TAGCCTGCTAACTGCTGCAGATCCTTTGGCATGACCTCATCGGGATCGGGCGCTGGC  
AACGGCATGCGGATCTTCCACAGATTTCCACCTTGCAGAAGCGCAAAACACTGACC  
CTTAGGCAGCCCCACTACTTGCGAAGGCTCGATCATCGGTACGCTGGACATGCTGAT  
GCGATCTTGAGTGTTGGAGGTGAAGTCCGTGGCACCTCGGATGTCCGAACGTGTCGGT  
GGCTCCACTGACGATGGTTGTGGAATAAATCTCGACTTTCGGTAGCTGGCGGGTGAG  
CAGTTCCGCCGTGGCTGTCTCCCGCACGCGCAGCATGAACAGGTTGTTGAAGTTGCC  
CACTACCTGACCGGCTTTGGCACGATTGCCGATGCGCGCCTCAATGTCGCTGAGCGT  
CTGTGTGTACGCGGTGACTTGGATGCCAGCACCACCACCCTTGTTGATCATTGGAAT  
GAACTCATCGCCCATAGCTCGTTGAATTCGTCAGCATGGATGTTGATCGGCAACTT  
CTCACCAGGAATTGCGCCTGGCAGACCGTCATCGATACCGAACTTGTAGATATGGCC  
AGCGACCGAAACAAGATCCGAGAACATCGAGTTGCCCACTGCTGCGGCGACCTCAG  
CATCTGATAGCGCATCTAAGCCCACATAGACAACCGCGCGTTTGCGGATGATCTGCA  
TCCAGTCGAAGATCGGTGCGGGTCGGCCAAGTCGGAATAGTTCGGCGCCAGCAAC  
TGGGCAATTTTGCCGCTGGTCAGCTTCTCCAGCAGAGGCAAGAGCGAGGCAACAAT

CTTATCGAAGTAGGTCCTGTCGTAACGTACCGCGCTGCGCAGGCCCTCCAACACGGG  
ATCGTAATTGCGCACCTGTCCCAAGTACTGCTCCAAGGCAACAACGCGCTTCTCACG  
TCCAATCATGTTGCGCGGCATGTTCTTGTCATTAGTCGGGCTTCTATCTGGACAATC  
ACCTCCCAAGCCTTTGGCTCGTGTTTGGCAAAGTAGTGCTGCGCATACTCAATGAAC  
AAAGCATCGATATTGATGACATGTCGCTGGATCAACAGGTAGTCCGGCCGCTGCCCC  
AGTTCAATGAGCGCGCGGGCGATGATGTTACGAACCGCCAGGCGAACTCGCGAAA  
GGCAGCACTGTTGCCTTCGCCCCGACAGCTGCCCTGCGATGCGCGTGGCAACTTCGGA  
AATACGCCCCGAAACGGCCAACTGCGTTATAACGGGGCGCTGATTTTCGGGCCAGCCAA  
GGTGAAGATGTAGAACTCACCTTCTCGCCCCGCGCGCTTGGCCTCGACGTACATAC  
GTTTGAGCAAGTCCGCATCACCTTTGGGATCAAACACAATCACCACCTCATGTTCCC  
CGGCTGGATTGCTGCGACGGATATCCTGAGTGATGAACAGCTCAGCCAACCGTGTTT  
TCCCAACACGAGTGTTTCCCAACACCAGCGAATGACCAACGCGTTCGCCTAACGGT  
AGGCTCACATCAGTTTCTTCGGGCTCTATGCCATGCAATCGAGGTAGCCCCGCCACA  
GGCGGGAGCGGCCGCACCGGATTGAAGGGCACATCCCAGCTGGTAATCCTGGCCAG  
GTTCAACAGTGGAATGGCGCGAACTCCAGTCTTTCTTCCAGGCGCCGGGCCATACG  
GTACATGGGCGTTGGCTCGACATAACGTGCAAACTCCGGGCGATAGGTCTGCATCA  
GTCGGTGGGTGTGCTTCTGCTCCCAGAGAAAACCTTTGCCGATGAAAAGCCGTTGCC  
GGCTAACCGGAACGTGCGGGCTGGTCATCACGTAGCGCGGCAGGCGCCGGATGTTT  
CGGCGATAGCGCAGGATGGTCTGGGCCTGGCGCAAGCGGATAGCACCAAAGGCCAG  
AAAGGCCAGTCCGCTGCCGATCCCTAGGGCAGGGCTCAACGCAAGCGACCATGGAG  
CTACGAAGGAGAGAAAAGCCGCACCAGCACACACAGCTACGGTGTAGAGCTCAACC  
GCAGGGCGTAACAAGACTTCTACCGGCTGAGTTTGCGCCATGGAGTCACTGCTCAAT  
GCCGGTGCTGGTAATCAGCACGGGGTAATGGCGTACGCCAGCCGTTTCGGCCAGAT  
CATCGGCGGTGACTGCGGCGAGTTGCATGTCTGGCGCCAAAGCTCTCAGACTGGCG  
AGCCCTTGGGCTGACTCAACATTGACGACAAGACCAACCGCTTTGCGCTCACGCAGT  
GCTACGGCATGAAGGCGCAACCAGGCATGCGATGCTTCATCGTCTCCGACCAGAAA  
AAATGGCTGTAGCCCCGGAGCCTCTATGACCCTGCGAGTAACAGTGCCAGGAGTGA  
GCTTGGCACTGCGTACAGGCAGCATGTCTACTTCATCTGCTGCTTTGGTGGGCGGTA  
TCGGTACAGCGACGGGGGGCTTAGCTGAAGCGGATGTACGCGGTTGCAGATTGAGC  
GCTTCGTAGTACGGTAATGCTGAGGCACCGCCAAGATCCTCGACGACTATCAAGGG  
CTCGCCTGCCAAAGCCATAGCGGGCAGAGTGAACATCATCAACAGGCTTCGGGCAT  
CCGCGATAAACCAACATTTTCATGGTGATGTCTCCTTTTCGAACGTTGAAGGTTGTTG  
TGAAGAACCGCGAACGCGGTCAAGATGCCGGGCCACGCTTTGTCGATAGCGTGCGG  
CCGGTGCACCGCCTGCCGGACGGTGATACCGACCAATCGCCAGTAACCAGTCGTCC  
CCCGGGATGTGTTGCTCCCGCAGGATTTGCGCTGCGATCGCCAAGTTGCCGTAAGGG  
TCGAGCAAGTCGCATGGGTGGCTGTAGCGATGCTTCTGATAGCCTAGATTGATCTGT  
CCCAAACCAGCATCGACGCGCGTCGAAGGCACCTTGCGCAACGCCTGCTGCAACTC  
GAAACAAGCTTCAGCACGGCTGGAGAAGCGCAGTGACTCGCCTGCAACATTGACTG  
ACCAAGGCCAGGGAATGATGCGCCCCCTCGACGGATAACCGCTTTCCTGGAGTGCA  
ACTGCGTACAGCACCGTTGAGGGAATACCGGCACTCTGTGCCGCGAGCTGATAAGC

AGGCGGTGGGATCTCCTGAGCATGGGCGGCATACAGAGCATGCCGACAGTCAGCA  
AGAACATTGCGCCCGGCAATGCCAGTCCTAAGGTTGGCGTTGCCATTGACCGTTGAC  
TTGGCGTATGACAGCAGGCAGCTCACCTGGTAGCCCCAGAGACAGCCAGCGACCGG  
CATCGTGGTTGAGGGTAATCGTGCGAGCGCTGACTAGGGGATGCATCGATCTTGGTGC  
GCCGCGCCCATTCGCGGATGCGAGCATCGTCAGACCGGCTACCCACCATATAAATGT  
CAAAAGCTGTACCCGTGGCTTGAAGGCGATGGATGACCTGATCGCAAGGCAAGCAA  
TTGTGCGGCACAAAACTGCGGCTCTGCCGCTCTCTCTACTCGCGGTAGCGGCGTTG  
CTGGGCCCCGGCATCTGGTAAATTGACACGTTGAAGATTCGGATGCAGCCGCTGCCAT  
GCCTCGTCATAGGCGCGTTGGTAGGCCAGCAACTTGTGACACGGCGTGCCTCTGCC  
TGCACCTGTAGCTCAGCATAGTGCCGCCGCTCCTCATCAGAGCGTGCTTCTGTCCCG  
AGGGCAGATAGCGGATCCAGATTGGGTGAATAGATGCCCAATGGGCCAGCCATCAG  
CTCCCGGTATCGTGTCCACTCCTCCTGCCGAAGTCCCCAGTCGCGCGCAAGCTTCTC  
GTCATGACTGTGATCGATTTGACTAGTCGACACCTGAGACTGTTTGGTTGTCACCTG  
CTGTGCCCAAGCAGGTGATTGAAGTGTTGCCAGGAAGAGCGCGAGAAACGGAAATA  
GTGACCTCATGGCACGCCTCCCTCAGGGGATCGCCAGACGGCGGGTTTGCTCGCCTG  
CGCGGAACACAGCGGTGTTCCGATCAATTTCTTCCAGCCGCCATTGCCCTACTGCTT  
CACCGGGCAGGACTACCTGGATCTGAGAGGCTAAGAGGTCACCACTGACGGGAGCG  
ACTGAAACCGTGCGCTGACCGGCACGCAGCTCCGATCCAATAACCCGAAATGGAAT  
GGGAATCTCAATCGGCTTAACCACCTTGGTTTGC GTTGCACGTGATTTACTTTCCACA  
CTGCTTTGAATCGCAGCCTGATGCGCTTTGATTTGATCCATCTCCATACGAAGTGCA  
ATCAAATCATCCGAAGTCGCGCGAGTGGCGAGTGCTCGCTCAAGCTCATCAATTCGA  
TGTTCCGCAGCCTCACGCACATCGTTTAGCGCTGATGCGGTGGCCGATTCCGGCCGG  
GCCTGTAGCGCGCGATTTGCATCAGCGATTTGCGCCTGACCTACCTCCAGCGCGTGC  
AAACGATTGAGGGTCTTTTCGCGTTGCGACTGCACAGCGAGCAACGCGATCATCACT  
AAGGCCATAAGCCCGACAAGCCACACCCACAGCAATATCTGGATGATCGAGTAGGC  
TCGTGAATGTTTCGCGCC

>CONTIG\_89\_length\_5331\_cov\_48.666987

GTATCGTTCGGCCTGGTCCAGGCGGCTGGATGACATGGGCAACTCCACTTGGCGGTG  
AAGTCGCTCAAGTCAGGTCGCCTGGGCCACTTCACAACCGTTGGTGTGCGAATCGG  
AGTTGAAGCCGCCAAGGCAACGAAAAAGGCACTTCGACTCGCGTCAAGTGCCTTTTT  
TATTGGTGGGCCCACCAGGATTTCGAACCTGGAACCAAAGGATTATGAGTTTGTGTC  
GATGCGCCATGCCTAGGAAAATCAGTCGTAAGGCAACGTAAGCAACAGAACAAAAA  
AGTAAGCTGCGACAGTAGTTTAGCGCAGCTTGGCGAAGACGGACAAAACCTCAGCTC  
TGTACCGCTTGAGTACCGCTATCGGAAACAATCTTGAACCCGTAAACGTTTCATAACG  
ACTGCTCCACGGGTTGACGACGGTCACACCTGTGCGCCGGAAATCGGCCGCGTTGC  
GCGTGACCACCGCCATACCGTGCAACAGGGCCGTCGCCGCGATGAGCGCGTCGCGT  
TCGCCGCGCTTGTCTGGTACGTGCAGCCGAGCGCAGCGTTGCGCCACAGCGGTATCG  
ATAGGCAATGTTTCGCCCATAGAACTCGGGTAATAAATGCTGCTCCAGCCAGGAGCG  
CAGTGTGGCCCCCTGGGCCGGGTCCCTGCGTTCAATCGACAGAACCCCGAGCTCCAG

CTCCATAACGGTGATGACGGATACGAAGAGGTCTGGCGGGCGTCAACACGTTCCGCCC  
ACGCCGCCACATTGGCATCGGCCCTTGCCGAGACTTACTTTTCGCAGCTCCGACAACA  
CGTTGGTATCGAGCACGTACATCATTCGAGATCAGCCGGCAGGGCTCCAATCGTCAC  
GCGCGGTGGCTCGAACTCGATCTCCGCGACGCCTGGCATCGCCAGCGCATCGGCAA  
TATTGCGCCGCTGCTTCGTGAGCCGCTGATAGTCCTCGAAGCTCAACAGCACGTGCG  
CAGGCTTGCCGCGATCCGTGATGAACACCGGACCGCTCTTGGTGGCCTTCTTTGCTC  
GCGTCACGTCCTGGTTCAGCTCGCGACTGGATAGGGTTGTGATGGTCATGCACGCTT  
CCGAAATCACCATGATGTAGTAACGTTACTACAAAATTGATTGGGAATAAAGCGGC  
TGCTCAAGACATCAACGTCCCTGCTAATTAACGAAAAGCGTGATCGAAGACCATTTC  
AGGCCGACAAGGCCTTGAAACTCCCAAGGGCAGCATCGCACCCCTGAATAAAGTCGA  
ACACAAACTGGACTCATCGAAAACGTGACGTGCAACAGGAATTGCACATGGACC  
ACTGCGGGCCAACCTGAACAAGACTCCGACCGCCTCAGCATCGTGATGGCCGTCTTCG  
CAGGACTGCACGCACGTCCCCAAGATGTGGGTGAGTGCATGGCTGCCGGCTACGGC  
GATACGGGTAGCGGATGAACGACACGCGCCCGTATCGGCTAACCAAACCGCGATCA  
CAACACTAAGGCCTTACAGACGAATGCGGAAAGATTCACTTGCCTACGCCGGCTAC  
TGGCGCAACTCGCTTGCAGATGCTGAGGGCGGGACACGGGGCTCTGCAGCCCGCCGA  
CGCCCCAAAATTTCAGAACCTGTCCTGTGCGGAGCTGGATGCTGGCCGCATAAGCC  
AAGGCATCATCGATGCCTGCTTCGCCAAAGAAGCCGAACAGACCGAGTTCGTGCGAG  
GTAATAATCCGCCCAAAGGTCTACGTGTCTCGCATTGAACACGGCAAACAGAGGCG  
CACCGGAACACCAGTCATTGTGACGCCAATCATTGCACCCGCGATGCTGGCACGTG  
ACGGCAGGCTGTATCCGCTCTCTCGAACGATCGTGCCCCGCGACATCCTGGAACCCCT  
TGGAACGCGGTACGTTTCGCCATCGGCGAAGTATCCGATCAGGATGCTTATCTCACCA  
CGAACACCATTGCCGGGATCAACGTTGCGACAAATGACGGCGAGCCGCTCAGCGAT  
GCAGAGTTCGACCAGCAATGGGCACGTTACAGGGCTGCTTGCGATCAATTGCTGGG  
CCAGGTTGGTCAAGGCTGGCCTGGTGCTGAGGACGAATACGAACTTGCCAAACATG  
GGTATCTCCTGAAAAAGGAGTCGTTCCCGGGCCAGCCAGCACATCCTCTCCCTTTACG  
ACCATATCCGCGCCGATTCGCCGACCGCCCCCTATTTCGATCGTTACGCCAGCACCG  
AGATTTCTCTCCTGAGCCCTGCTTGCCGAAAACGCCGCGTTCTCCAGGCGATTGG  
CGCATGCCAGCGACCAGTTTTCACTGGCAGCCGCGCAGCGCGATGCTTTGGCTACCC  
TGTTGGCTGCAGAAACAGGCGAGATCCTGGCGGTCAACGGGCCTCCCGGCACCGGG  
AAGACCACGCTACTGCTATCGGTGGTCGCCACACTATGGGCCGAAGCGGCGATCAA  
TGACGATGAGCCGCCGGTCGTGGTGGCGGCCTCAACCAACAATCAAGCTGTCACCA  
ACATCATTGATGCGTTCGGGAAGGATTTTGCAACTGGAGAAGGTCCGCTCGCCGGCC  
GCTGGCTGCCCCGATGTCCACAGCTTCGGCGCCTACTTTCCTTCCGCAAGCAAAGAAC  
GCGACGCATCAAAAAAGTACCAGACCAGCGAGTTTTTCGAGACGGTGGAGTCGGAG  
GCCTATGTGCGCAACGCGCGGAAGGCGTATCTAGACGCCGCTGGCGCTGCATTCTCC  
AACATGGCTAGGGAACAGCTCCAAGTCCAGGCAGTTGTGATGCATTGCGCGCGTC  
GATTCAAGCCGAAGCGAAGAACTTATCGCCATCGAAAACGCATGGTCAGCGCTGC  
TCACCGCACGCTCAGCACTTCGAGCAGAGCTGGGCGAAGAGCCTGCCAACAGTTTG  
GCGCAACGCCGCCATCTGCATGAAACAGCACTGGCTGAGAAACGCGCGATCGATGA

GTTGTCCGAGCAATGGGAGCACTATCTCGCAAAGGAATCTCTCGTCTACACCTTCTT  
CTCGTGGCTTCCGCCTGTCACCAAGAAGCGCATGCGGTTGGCTAGCCTGTTTCTGAA  
GCCGATCTGGCCTACCCAGTACGCGCAAGGCGCTTGGGAAACCATCGATCAAATCG  
AATCCGCCGTTAAGGCTGCCGCCAGCAAAGCGGAGCGGAATCTACGCGAGCAGATC  
CATAGCGTCGAACGCGGCCGAAGCTGTCCTTGAAGCAGAGCGCGCTTGCCTCACGCA  
CTGGCAAGCCGCGCTGGTTCGCTCAACGTATCGCACCAAGGCAAGCAGCTTGTCTT  
GGCTGATTGCGATTGCTTGCCGACATGCGCATTCGCTTCCCGATCTTTCTGCTGACA  
ACCCATTACTGGGAAGGCCGATGGCTGCTGGAGATGCAGGAACTGCTGCCCGGGAT  
TGAACAGGAACGAAAGAAAAATGGACGAGCTACTTTGGAAAAGCGTTGGCGGCGCC  
GTATGAAATTGACGCCCTGCATCGTCTCGACGCTCTTCATGCTGCCCAAGGAAATGC  
TGGTTTCTCGGCACAACGGCAGCGGCTTCGTTCCCGACTATCTCTATGGCTTTGCCGA  
CCTCCTCATCGTCGATGAAGCCGGACAAGTGCTTCCGGAAGTCGCTGGCGCGTCATT  
TGCACTGAGCAAGAAAGCCTTGGTGATCGGCGACACATTGCAGATCGAACCGATCT  
GGTCGATTCCGCCAAGCGTTGACATCGGCAACCTGCACAGTGCCAAGCTGCTTTCAA  
TCGAGACTCAGGAGGATGACTACGACCACCTTTCGCAGATCGGCAAGACCGTCGCT  
GGTGGCAGCGTGATGCGGATAGCGCAAACGCTGACGCGCTACCACTACGACCCAGA  
TCTTGCCCGGGGCATGTTCTGTATGAACACCGCCGCTGCTTCGACGAGATCATCGG  
CTACTGCAATGCGCTGTGTTACCGGGGCAAGCTCATTCCGACGCGAAAACCTGAAAA  
CCCAGGCAGCTGCGGATCAACAGGATGGGCTGCCGGCAATGGGGTACCTCCATATC  
GACGGAATCTGCCAGAAGATCGGCAGTGGCAGCCGGCATAACCTGCATGAGGCGGA  
AACCATCGCCGCCTGGATTTGAGAACACCGCGCTTCGCTGGAAGCTACCTACGGGGCA  
GCCACTGCACAAGATTGTTGGGGTGGTGACCCCTTCAGCGGACAGGTGCAAGCCA  
TCTCCAATGCCTGCCGCAGCGTGGGCATCAAGGTCGGCAACGACGACGACGGCATG  
ACTGTCGGGACCGTGCACTCACTACAGGGCGCCGAGCGCCCGGTAGTGATCTTCTCT  
CCGACATACACCAAGCATGCCGATGGCGGCTTCATCGACCGTAGCGCGAGCATGCT  
CAATGTTGCAGTTTCCCGAGCGAAGAATACGTTTCTGGTATTCGGCGACATGGATGT  
ATTCGAGGCAGCTCCCGTAGCGAAGCCGCGCGGCCTGTTGGCCACCTATCTCTTCCG  
AGATCCCACCAACGCCCTCCACTTCGAACATCTGGTACGGCAGGACTTGCGGGAGG  
CGGATGCTGCCATTCAATCCCTAAGGGACGCGCAGGAACATGACGCTTTTCTGCTAG  
CATCTCTCGCCACAGCAGGCCGCGAAATCCATATTGTCTCTCCCTGGATCATCTTGG  
ATCGCATCAAGGAGATCGGCGCTCTCGCAGCCATGCGTGCTGCAATCAAGCGTGGC  
GTGAAAGTAACGGTCTATACGGACCCGGAATTCAATACTGACGGCAGCCACGAAGG  
ACACGATAAAAAGCGCCAGACGCTAGACGCCACCGCCGCGATCCTGCGCGACGCGG  
GCATTCAAGTCGCTTTCGTCACCAGAGTTTACAGCAAGGTGCTTATCGGCGACGACG  
ATTTGTACTGCGTCGGTTCGTTCAACTGGTTCAGCGCCAGACGCGACGCACAGTACG  
CACGCCACGAAACCTCTCTGGTATATCGAGGACCGGGATTGACAAGCGAGATAGGC  
GTCATGCGAGCGAGCTTGCGGGACCGCTTCACAGACTAGGGAACCTATGAGCAACG  
CGCCCCAAAAGCGCGACACTATCGGTTCGGAGTGAGGAGGCATCCATGCAACTGAC  
GCTTGAATCCTGGCTGCTGGTGTCCAACCTAGGGCCTGTTAACACTAATGGCCCGAGC  
GATTAAACTATTGAGCATGGAGATCACGCCAGCACAATTTTCTCTGATCGAACACTG

CCTGCCGGCGCAGCGCGGCAATGTCAGCATGACCAACCTGCAAGTGGTCAACGCCA  
TCCTTTACGTTGCCGAGCATGGCTGCAAATGGCGCGGCCTACCCAAGCGCTTTGGCA  
ACTGGCATAACGGTCTACACAC

>CONTIG\_90\_length\_5179\_cov\_81.594418

TGCTCAAACGCGAGCGGATCAGGCGGCGGACCTATCCCACCAAGGACGCCGCTCGC  
GCCGAGGTATTCGACTACATCGAGATGTTCTACAACCCCAACCGTCGCCACGGTTCA  
ACTGGCGACCTGTCCCCTGTAGAGTTTGAACGGCGCTACGCGCAACGAGGGTCTTGA  
GTGTCTACGGAACCCTGGGCGTATCATTCCGTCATCGACGATGATTATCACATACTG  
ATACAATGACGGAGAAAATTATCTCGGGCCCATCATGAAGCGGTGCATCGTTGGTGT  
TCAGCGAGCAGATGGTTCACATCCTCATCCTCATCCTCATCGGCTCGTAAGTGAAAC  
ACCGAGAGTTTGGTTTCCTTCTCTGGCATCGCTTGCGGCTGTGCTCTCGGACGATAAC  
CGCCGTTTGCTACGCCTGATCCATGAGAAAAAGCCAAAGTCCCTAACGGAAGTGGC  
CGAACTCAGTGGCCGAAAGGTACCTAACCTGTGCGGTACCCTGCGACTGATGGCGG  
ATTACGGGCTGGTCTCGCTGCGACGTAATGTGAGAGATGTCCAGCCGACAGCATTGG  
CGACTGAATTCCTGGTTCGTGCTGGATTGATGATGGCCATGAATGCAAGAGGGGAGA  
CGATGGCTCGGATTTGGATGGTGC GCGGGGACGGTGGCAGCTTGTACGACATCTTTC  
GAGAATGCGGCGTAGCAACCGTGGGTTGGCAGTTGGCCGCCCATGCCAAGGCTGGC  
GTCGGACGCGTGCAATTGACCGCGCTGTACCAGTCCGCCGAGCCTCAAGCAAAACA  
GGGAACGGTCGTGCTGGGCGCCTCTCAGGCTTGGCGCTTTGTCAATGACATTCAATA  
TGGCAATTGGGTTCGTGAGAGCGGGTGTCAATCCCGCTAGTGATGTGACCCCTGGACC  
ATGGGGCTGTGCGCTGATTGAGCACTACGATGCCGCCGATGCCGAGACCAAACGAG  
TTGTGCCGTCGAAGCGGCTTCACTGGCCAGCGTGAGTTTGAAATGAACGGCATGAGC  
CAAACAGCCATACAACAGTTATCCAGTCGACGCGACGACAGTGCCTCCTAAATATCCC  
ATCAAGGTGAAACCACATGGCGCAAGCTGATACCTTGGTCGCCCTGGTAAAAGCAG  
CCAGCAGCGGTGACCAACCGTCTTTCCGGAAGTCGACCGAAGCCTTGATTGAGGAA  
GAGCGCGGAAAGGGGCACCGAATCCTTGCCGACCGCCTGGAAAAAGCATTGCGCGC  
GTCCTCTACCAAGCTGCCTTGTTCCAATCTTCCACTCCAATGGCGCGCCAAACGCA  
GACTGGAGGTGTCGCGCAGAAGGATCTGGTTGCCGAATTGACGCCAGAACGTTTCGC  
TAGAAAGTCTGGTCCTTGCCAACGGTATCCGTGGGCAATTGCGTGAAGTTGTCGAGG  
AGCAGCATCGCGCAGAGTTGCTGCATGCTCATGGCTTGAGCCCTAGACACAGAGTTT  
TATTGGCTGGGGCGCCAGGGAACGGCAAAACATCGCTTGAGAAAGCTTTGGCATT  
GAGTTGATGGTGCCGCTGATCGTAGTGCGTTATGAGTCGTTGATTGGCAGTTACCTG  
GGAGAGACTTCTGTCCGCTTGAAGGCCTTGCTTGACTACGTTTCGGACGCGGCGCTGC  
GTTTTGTTTTTCGACGAATTCGAGACATTAGGCAAAGAGCGTGGCGATACACATGAA  
ACCGGAGAGATCAAGCGCGTCGTCAGCTCTTTGTTGCTTCAACTAGATGATCTTCCC  
GACTATGTCGTTGTGGTTGCTGCAAGCAATCACCCAGAACTTTTAGATAGGGCTGTT  
TGGCGCCGTTTCCAGGTTAGGCTGGAAGTCCCCCTTCTACACGAGCCCAGTTGACT  
GCGTTCGTCGCCTCAATCGGCGAACGCAGCAAAGTCAATTTTGGCTTGGCAGCTGAG  
ACCATTGCAAAGCGGCTTCTAGGCCTTAGTTTTTCAGAGGTGGAGGAGTTCTGCCTA

GGAGTAGTTCGGCGAGCAGTATTGGATCAAACAGTAGATGATGCCAAAACCTATTGT  
CTTTTCTAGGCTTGAACAATGGAAGAAACGATTGAAACCTGCCGGTAAAGAAGCAT  
TAGACCAATAGGGCACAAGGAGGGAATATGCCTGCTGAGTACTTGCCGTTGCTGGTT  
TTTCCAGAAAGACGAATCCTTCAACCAGAAAAGGGGAACGGTTTTTCCACCGGGCAA  
ACAGAGCTTGCCGGGGCATGGCGCCCAGGTCGTCCGTATCGGTAGGCAGATCGAAC  
AAGTAGAGCAAGACTTTGCACGCTACCAGGCAAGCCTGACCGGCGTCTTAGCTGGA  
CTGGAACCTGAAATGGTTCTAGTTATCGAGATTGTTGGACGTCTTGATGACTTCAGG  
CAAGCCGTCGAAGCGGCTGGCCTGGAGTGGTTGGGAGAAACCGAGCTCGACGACTT  
GGAAGCCGAAGATGATAGCTTCTACGAAGCAGATGTTGTTGGGCAACGCGTGGTTA  
AGCCACTGAGCGGTTCGCATGTTCTGGCCATGAGCAACATGACCGGTATGCGGGAG  
ATCCTCTCGCTTTGGGAGCAGTGGAAGAGAAATAGAGACCTGGCTCACGGAAAAAC  
TAAATGGAAGCGGTCTTCGAGCAGTTAAATATGCTCCGGCGTTGGGGTATCGAGG  
AAGCGCTGGTCGAAACAGGAATGATCGACCGATGGCAGGATCTTCTGGATCCCATT  
ACTCCGGACCAACAATCACCTTTCAGATCGAGCTCTTCTATCGCAGAAGTGATCAA  
AATCGAAGTGCTAATGAAGCTGTAATCCGTTTCGCTCTTAGAGAGCCTCGGAGGCAG  
AGCGATTTCTGAATTTATTGATATGCCACAGATTGCATTTTCATGCGGTCAAGGCCGA  
GCTGCCTGCTCGCGCTATTCAGTCGTTGCTCGATCAAGTGGCCGTGGGGGGAGCGGA  
TACCGACATCGAACTATTTAAGTTCGCCGGCATCATGTACTTCCGCCCTACCGGGCA  
GAGTCTGGCGGTATCAGAAGAAGGCGAAGGCGAACCTGCCATTTTTCTCAAGGTG  
TCAGTGATCTTCCGCCTGTTGCGGCGCTTCTCGACGGTGCTCCGCTGCAACTGCATG  
AGGCCCTGAAAGACCGACTTCTGGTAGATGATGTTTTTGGCCTAGAGGCTACTTACC  
AACCCGGTGAGCGAAAGCATGGCACCGCCATGGCGTCCTTGATTCTGCATGGTGATC  
GAAGCAACCCAGAGACCGAGCCGCTGGGTGCGAAGCTGTATTGCGTTCCCGTAATG  
CAGCCTGACCATCAGACACGTGAGAATGATGAGCACATGCCGGACGATGTTTTCTTT  
GAGGACCGCATCCACATTGCCGTTTCGGCGCATGTTTCAAGGCGCTGGCGATGTCCCT  
CCGCAAGCGCCGACGGTCAAGGTTATCAACATCTCCCTTGGCGATACTGCACGAGA  
ATTCATTACACTCCGAGCCCATGGGCAAGGCTGCTTGATTGGTTGGCTTATCGCTA  
TCGGGTGCTGTTCTGCGTCAGCGCGGGAAATTATTGTGAAGGGATTGATCTCGGACT  
TAATCAACAGCAATTCGCCGCCCTTTCCGATGGTGACAAGATAAGGGCCACCATCA  
AGGCGGTATCACGCAACCTCTCTTCACGGCGTTTGCTTTCACCTGCTGAAGCCATAA  
ATGCCATCACAGTGGGTGCTGCTCACACCGATGACTCAGGGGAGGCTTATGCCCAGT  
TTGGGCAACGGGTCGATGTGTTGCCTTCTCAAGCATTGTTTACGCCCTGCCACCCGCC  
TGGGATTTGGTTTCCGACGTTCCATCAAACCGGACATCTTTATGCCTGGTGGTCGGC  
AACTCTACAGCGCCCCTCTGCTAGCAGCATCCACCCTATACAGCATTGACAATTCCG  
TCGTGCCCCAGGCCAGAAGGTGGCGCTGGACAGTAGACAGCAAGGCGTACTGAAT  
CATGAAGTATTCTGGCGTGGCACCAGCAACGCGACGGCGCTGGCGACGCGTGGCGT  
AGTACGTCTGTACGACATGCTGGACAAGCTGCGTGCTGAAGAGGGTGAAGACATTC  
CCGAAGCACTAATGTCGGTGCTGCTGAAAGCGCTCCTAGTTCACGGCGCAAAGCAA  
GACGACGAAAGCAAGAAGCATATCGAACAAGCGGTGAAGGATGCGCGTAACTCGC  
GTCAGTTCAAGCAGGTCACCGCGCGTTACCTTGGTTATGGTGCAGTAGATATTGAGC

GCGTGCTGACCTGCACAGCGCAGCGGGCGACAGTCCTAGGGTGCGGAGAAATTCGG  
GAAAACGAAGTGCATGAATACGCCCTTCCCGATTCTCTCCCGGGTTCTCTTCCCAAAAG  
ATCTGGCGGCGGTTGGTCGTGACCCTGGCGTGGCTGACGCCGATCAATCCGGACCAT  
CGCAACCTCCGTGAAGCCAAATTGATGCTGGAGCCAGGCGGGGGAAACTGGTCCAG  
TCAGGTTCTCAAGCTGGACCGTCAGGACGGAGACCACAATCAAGTTGAGCGTGGCA  
CCGTACAACATGAAGTGCTGGAAGGAAAAAACAGATTCAGGCCTTCGAGGACGGG  
GAGACCCTGCGAATCCGCGTTTCTTGCAAGAAGGACGCTACTGCCTACCTCGATGCC  
GTTATTCCGTACGGACTCGCTGTACGCTGGAAGCGAAGGAAGACATTCCGATCTAC  
CAACAGGTCCGTGCTCGCATCAAACAGCCAGTGCGCATTGCACCTGGAATAGGTGCG  
GTAGGGAGCTGGTGCTCCGCGTCCGTTGCGACGGCATGGATGGCAGTCCTTGAACCT  
TGATGGAAGTTCTTGACGAATTTTGTGTCATAGGGCGAAAAACAAGGCTAGAATTC  
AGGCCTTCGCTAATCATAGAGGCGAAGAAAGTGATTGGGAATCAACGACTTAGCGC  
TCTAAAGCATGACTCGTTTCCCGCTCCAGATGTAGACTAGGCCCCGTGTCCGGGGTC  
TCGTTGTTTAAAGGGCAGGATGCCTGGGATTTGATATTTTCGGCCTGGTGGTAGAGTG  
GTTATGCAGCGGACTGCAAATCCGCGTACGCCGGTTCAATTCCGGCCCCAGGCCTCCA  
TATTGCAGCGCTGCTTTGTGCATCCATCGAGATGAATTGGGCTAGCGTAATGAAGCA  
ACAAGCTGTACAATTTGCTCCACGCGGGAA

>CONTIG\_91\_length\_5067\_cov\_7.430162

CAATAGGTCAATCCAAAGCCAAAGCAGCAGGCGCCGCCACCCGCGGCCTTCTTCGT  
ATGTTGCGCATGGAGCGCTCTCGCGTTTGATCTCGATATGAGCTATGTTTGGGTGGG  
GTTGCAGGAAGATTTGGTTGCCGTAGTTTCGCGGCATCAGAAACGATTGCAAGGTGA  
ATTTGCCGATTGGCGCGAGTGCAGCAATACGCTCGCCATGCGTGCGAAGGAGTTCCT  
GCAACCCCTCCTCTTTCTCACAGGGAAGTCAGATGAGTGAGTTAAATAAGCTGAAAG  
CGTGCACCACGATCGGCGAATTGGCGCTACTGTTGGGCTTTCAGGCCAAAACGCTCG  
GCTACATAGCCTGGGGACTCCCATCCGCAACTAAATACAGCACTTTCGCCATTCCGA  
AGCGCTCGGGTGGCAAGCGGACAATCCACGCACCTTCCCCACAGTTGAAGCTTGCTC  
AAGGAAAGCTTTCGATACTGCTTCAGGCGTGCGAAAAAGAAATTGAAGAGGAATTG  
GGTGTAACACACAGTCGCCCACGGGTTCAAGCTAGGCCGGTCTATTCTTACCAAC  
GCGGACGTGCACCGCCGCCAGCGTTACGTCCTCAACTTTGACCTATCAGATTTCTTT  
GGAACCATTAATTTTGGGCGGGTTCGTGGATTCTTATCAATAATCGAAATTTTCAG  
CTGCATCCAGATGTTGCAACTTTGATTGCTCAGATAGCTTGTGACAAGGACATGCTT  
CCTCAGGGGGCGCCAACTTCGCCTGTAATCTCTAACTTGATTGGAAACATCCTGGAC  
GTCAGGCTATCGAAAGTAGCCAGAGCTCACGGCTGCGCTTAACTCGCTACGCAGA  
TGACATTACAATATCCACTTCGCAGACTGAATTTCCAAATGCAATCGCAACCCAGGT  
AGATCCCGCTTCAAGGTGGACACTCGCGAAGGACGTCGAGCACGCAGTTGCGGCCT  
GTGGTTTCCGCATTAACCACGCAAAGACGCGACTTTTACACCGCCGCTCCCGCCAAG  
ATGTCACCTGGTATCGTCGTTAACAGACACGTCAATGTGAACTCTGATTATCGCAGAG  
CGGTCCGAGCGATGGTCAATAACCTATGCTCAACGGGCACCTATCAGCGCAAAAAA  
TCTATCGTTATAGGTGAAGACACAACCTGCGGTGTCCGTCGAAGGCTCTCGGCCACAA

CTGGAGGGCATGCTCGGATTTTTACTACAAGTGGAGCGCTACCGCAGGTCAGACGA  
GCCTGCCCCGCCAACCTAAGCTCCACAGAGCTGCTGCTACATCGCTTCCTTTTCTTC  
ACAACATTCGCAAACAACGACAAGCCGACTATCCTTTTTGAAGGAAAGACTGACAG  
CATCTATATAAGTGCCGCAATTAAGCGACTTAGGGCATCCTACCCACTACTCATGGC  
ACCAGGATCGAAGGAGTTGCTTGTTAAGCTCCTTCCCCATACTAAGACGCGAGAGA  
GAATTTTAAACCTAACTGGTGGTGACAACCCTTTGACTAGCTTTATCGTCTCCTACCG  
AGAAAGCTATCGCCGCATTAAAGGCCCCAAAGGAGCGAATCCCGTCATAGTGATTT  
TCGACAATGACAGTGGAGCAAACGCCGTAATTGCAGCAATAAAGAAGCACTACAAG  
CTAGACATGCATGATGGCGACCAATATATACGCGTTTATGACAATCTCTACGTCCTT  
TTAACTTCGAAGAAAGGCTCCGGAAATCATTGTATCGAGAACTACTTTAGCGCGGCG  
ACGTTGGCTAAAACACTTTTCGGGAAAAAACTCAGCCTGTCTAACAAAAAATTGAA  
GGACGATGAGTATGGAAAAGCATGGTTCGCAGAGAAGATCGTGAAGCCATACTATA  
AGGATATAAATTTCTCTAACTTTTCTAGCCTCTTAGACCCCATCTGCGAGATCATTCA  
AGATCATTCGCCCTAGGGGTACATCCAACCTCTTCCAACTTATCGCTCACTGTGCG  
GGAAATCCCTGCTAATTTGTGAGCGGAAGGCAATTTTACGTTGGCGGCAGTATTGCA  
TTCTTGAGTTGTCCGAAGGACATTTGACTTATCTAGCTGCATGAATTGACGGACCAA  
AGAATTGATTTGCGTTGGACAGGAGTAAGCTATACGTGACCTACAACCAGCTTGCCA  
AGATAGCTGCTTCTTTTGGGCTGCGAGATTCCATTATCCACATCTGGGCCTACAGTTT  
ACATGTCGGTTATGGATACAACCTTCCGTTTGTAGTATGCGCACTCCCGGCAAGGGCT  
TCATAATCAAATGAAGCCAAACGTCCATGAGTTCTACCTGGACCTCTACCTCAAAGA  
GGTGCTTCTTCACGCAGGTGCTTCGAAAGGCGCGCGCCGCTCGCTACGGGACTGGA  
ATGACCTTGGCACACTCCACAACGCTATTCGCAGCTACAGTGATTTCAAAGCAAAGT  
GTGACTTAGACATCTGGACCACAATGCACCGTATCGGGCATCAACAGTTGCCTCACT  
TCGATCGCTTTGGATCCTCATATCTTGGACGCTACTGGTCTCTCTACAAGCGTGGTCG  
CCTCTCCGACGTCCTTTACAACGCATTGGGCCTAACATCCGAAGATTACTTTCTCTTC  
GCCGGAGCCACCCAAGCGCTTTTCATGAGCAACTATGAAGTCCAGTTATTGTCACAG  
CTGACCGCACTCGATTTGGACGCCGCGGCAGTGACAGCAAGGGTAGCTGCGATCAC  
TGCCACGCCTAAGCTGTTGCGTAACCGCTGCCTCCTTGATGCGCGGCATGACTCGTC  
GTGGGACTACACCCCTAATCCTTTAGCGGTGAAACCCCTAATCCTACTGCGACCCGA  
CGCCCCGACTAGGCTGTCCTGTCCACGCCCGTCACTCCTGGGAAAGCGACTACTCGC  
AGGACTTTTTTATGACCTTGCGAACGCTGACGGCTTTGCCCAAGCCTACGGGGATGC  
ATTCGAGGATTTGGTGGGCGACTGCCTTGGTCACCTCACAGGTGCAACTACTACCGA  
GCGCCCCGCCCCCTACACCGTTGCCGGTTCCCAGCGACACGGTAGCGACTGGATTCT  
CCGAGACGCGGCCACCACAGTCTTCGTGGAATGCAAGACAATGAGGATGCCCATCT  
CGGCACAGCTTGCGGCTAGCCCTGGCGAGCTGGAGCACGGCCTGAGGCGCCTAGCG  
CAAGCCGTAGTCCAGAACTATCGAAATATCATCGACGTAACGTCAGGCCGCGCAGA  
AATTAACTGCCCCGATGGGCCTATCTATTCCCTGATTGTCACCCTTGAAGACTGGAT  
ACTATTTGGCCAGAAGGCAGTAGATGCCCTTACCAGCCTCGTGGAGCAAGAGCTAT  
GCGAGCGCGGGATGGATGCGCGCATCCCGCAACGTTACCCATTTGCAATTGTCGGAT  
GCGCGGCATTGCCACGTGTGGTCTGACTCAATCAGTGAGCATGGGCTACATATCTTCA

CGGACAAAGCCTCTCCGCGCTTCAAAGGCTACTTTTTCCCGCAGTTTTTGAGCGAGG  
CTAACCTATTTCAGCGAGGGGCGGCGAGCCGCAATGTTTGACGGTGAATGGAAGGAT  
TTGATGGAGCGCCTCAGAATCCGATTCCCGGTGACATCGGGTCAATTAATCTAACAA  
CTGTGGAACATCGCTTCTATCGCGCCTACTTTCGATGCGCCCATTTCTCTTCGTTAGG  
AATTATCACGAAATCAGAACCAATCAACCCTTCCAAATGCTCTAATTCCTCATGTTG  
CGCTATCGAAGAACTATCCAAAAACACATCCGGCATGGGCTCAGGATAGTCGTCAT  
AACCTCTCCTGGTCACAACTTTGAGTAGAACCAGTCACGCAGCCCACAAGGTGGA  
ACACGTTTCCCCGCCTCTATCATCCACTCTTTCCTATCATCTACCCTAGCCATATTTA  
AATCCTAATTTCTTAACAAGATAAATTAATAAATTTTTGCTGTGGAGATAGGCTATCA  
GAGTATTCCAGGAATGGCTATCAGGCCTCATATCAAACCTCCATCATTCGCTCGAAAC  
CAAACCTCATCCACAAATCAGGATCTTGCCTAACAACATCTGAAACTTTTTTACATC  
CCTTGAACCTTTCGCCCCCTCATTTCTTCACGAAAAAGCGGCGCGTCGAAACCCAATC  
TTGGGACACACTTTATAGCCCCAATACCCGGATTTTGGTTGGGCATGACGAAAGCGAT  
CATATCCCCCGCAGCGAATAGCCTGACTGATTTAATGCCGACTCGGAAAGCCGTGA  
GAAGCGAGAGCGATATAGCGACGGTACCAATAAGTCGCCTCGAAAAATTCTCATCA  
AACTTCAGGTGATCCATGTATAAAGACTTACCAAAAAGGTCAAAAGGACTAGCCTT  
AAATATACCGACCCGAACATCTTTAGTCGTTAAACCGCGAACAGAACTGATCACATA  
AACTCCCAATGGAGCCTCTAGAGATTTTCTTTGCCCGTAGCGCCTCGACCACGTCTTT  
GTATATTCATAAGCACAAGCATTATTGAAAACCATAAAGAGCCTACAGAGGTCAAT  
AGGATTCAAATTGAATGCCCCGACCTTTCTGTGCTTAGCAAGCCCATTTCAGAAA  
TGAAACGTTGCGTGCACTCAGATACTGGCCTGTAATCTCATGAGATGAAATGGAAGC  
ATACAATCCACTCAGACGGTCTTGTAATAACTTAATTGCGACCCGGAAATTTCTGA  
AGGCCCGAATCTAGAAAAAACCTTTTCACCTATACCCATCGTCATCCCTCTTAATGG  
TTGTGATTTTCGAGCACATCCCTACGACACGGCGGAACCCACTTTCAATATTGATCT  
ATGTTCCAGGCCCCGGAAAAAATGCTTCTATCCGATTGGAGTGCGCCTTCCAGGGGG  
CATCAAGAAGCTCATCCTTCATAGGGCCTTTCATCTGCGCAAATTGATTTCAAATTC  
ATCCGGCTTATATGTGGAAGCAATACAGGCGGAATGAATTTGGCAAGCGTCGCCA  
CCCGATCCGGCAGACTCCTCCGATCAATGTAGAACTTCTCAAGCACAGTCTGCCCAG  
TCCCGTGCCC

>CONTIG\_92\_length\_5053\_cov\_18.538368

CGATGGGGACTGTCCCGTGGGGGAGTTCTGCGTTGAGGATCTCGCTGGCGACTGCCT  
CGCGAATGGCGTCGTAAAGATAGAGACAGCCATGGGAGTGTGACCAATCATGGGCC  
TCGGAGACCAGTGGCGTGGGGCCGGTTCTTTGGCGATGAGCATGCCATCGGAGCC  
ACAGCGGCCACTCCCCCGTGATCGCCCCACCGCTCCCACCATAGCGATCAGCGCC  
CAGTGCCTGTCCGCCGAAGGTGCCGGCAACGCAGTGGGCTTCGATAGAGGTACGG  
CAAAGCGCTCAAGCAAGGACGCTGAGATGCGGGCCCCGAGTTGACGCGTCGTGGATG  
GCTATGCCTAAGTCGTGAAACCAGCGCTCATTGAGCCAGAGCAAAGAAGCATCCGG  
CAGTCTTCCCCTGGAAGGGGCACGAGCATTGAGGTGCTCACGCTGGCAAGGCTCA  
ACAGGTTGGGGTCGTTCTTATCATCCATGTCCCAGTAGTCATTGGGCATTTGCTTCC

TTGTTTCCGCAGCTGTTGCGACTTAGCGTTCGATCGGCGTTGGTGATGCTACCAACCT  
GACGGCAATTCGTCTTGCTGCTGCTTGGATTTCCCGAGGCCACGGGACATCACTTCT  
GCATGGACAGTCAGCATAAAAAACGACACATGGCGTGAGGGCGTAATCAGATTGGTA  
CAGGTCTTATTCATTCTTTGGTATAACTAATATTTATATGTAAAAAGAGCCATGGTTG  
ATCCAACCTGTGGCGAAAACAAATTCAAAGAAAAAATTAAAGAGCAAGAGCGCACTTA  
TGGTTTCTGCTTTGCAGAAACCGTGCGCCAACGCTGTGCGTCGGTGCGGTGGCTTTC  
GCCACCTCGTTGCCTATGCTCCGCTAGGCAACACAGCCACTTCAAAACCTCGTGATC  
AAGGTCTCTGTGCTGTGCGAGTTCGCTTAACCTCTCGACAGGGAATGTTCTGTGCTTCT  
TTGTGTGCTCCACAAACAAACAGGAGTTTCACAAATGGCGATTTATCACGCAACAAT  
GAAGTCTTTCAGCCGAGGCAATGGCGACTCTTCGGTCGCAGCAGCTGCTTACCGCGC  
AGGGTTTGATCTTCTCGATACGAGCACAGGGCTTGGCCACAATTATTCCCACCGAGG  
CGGTGTCGATTTCCATCAGATGCTTGCGCCGAAAGGAGCGCCCGAGTGGTGCTTTGA  
TGCGCAGTATTTTTGGAACGCGAACGAAGCGGCCGAGACGCGCAAGAACGCACGCG  
TTTGCCGAGAAGTCGAGGTGTCGCTTCCGCACCAACTCGATCCACAACAACGGAGA  
GTGCTCGCTTTGGCGCTTGGCCAATTGCTGGTCAATCGGTTCAAGGTCGCAGTATTG  
GTCGCTGTGCACACACCAAGCAAATATGGTGATCAGCGCAATCATCATGTGCATTTG  
CTGATGTCAGCACGACAAGTCGGCCCAGGAGGACTGGGGGAGCGCGCTTGCGCTGA  
GTTTGATGCGCGACAAGGCGGGCGGCACACGAGCGCTGCGGCAAATCCGCAAAGACA  
TTGCAATGGTCATCAATGCGCACTTGAAAAATGCGGGCAATGCGGCTCAGGTAGAT  
CATCGCAGCCTCCGAGCACAAGCACACGAAGCCGCGCGCAATGGAGAGTTTGAACG  
CGCCCGCGAACTCACGCGTCGGCCTGGCAAGCACTTGGGCAAAGCCAAAGTGGCGG  
TGATGCGCAAAACGAAGTTCACAGCAGAAGTCAGAGGGGCAGGTGGGCGAGAAGC  
AGCACTGGCGCTTTCAAAGCTTGTCGCTGAGCACATGAAAAAAAGCGGGGGCGTCG  
TGCACGAAGTGCCACCGTCTCATAGCCATGCGACAGCACTTCGGGATCGGGCCAAC  
GCACAGGCTTCTGGATTGGACGGGCGCACAGCGGTTGGGCAGACACGATTGTCAGG  
CGCAGAGCGGGTGCGGCAGATCAAAGAGCGCTTGGCGCGTGCGCCAGCGCCTCGCC  
CGGGTCTCTACACGCCTTACAGCGGTCAGACCCGACATCTTAGTCGCGTGACGCGTT  
TGGCTCGTTCCTCGGGCCGACAAGACGCTGAGGTGCTCAATGCGGAGGCGCAACTG  
ATTGAAGATTGGCTCGAAGCCCAACGAGCGGTGGCTCAGCAGTCTCTCGAAGTCTTG  
CGGCAGATCCCGGGTATCCAGATTGAGCCCGAGTTCCAGCGGGCGCACTCCACGCT  
CGTTTGCCGGCGAGCGGATAGCTACGCCTGCCGGCGAGCGGATAGCTACGCCACCA  
AGCCATTTCTCTTTGAAGACACCGAGATGCTTGCTCGCTCAATCAGCAAGTATGCCC  
ATGCGCTGGTGCGACCCTACAAGGCGCGTGTGGCCGTGCTAGATGCGCAAGCCAAG  
CTCTATGAGCAAGAATACGATTCCGATACGAAAGCGGTGGCCAGAGCACAGCGGCG  
CTTGGCGCGAACGAAGAGGCATGTTTCCCCGCGCATCCAAGCGATCCAGCAGGGGC  
GGATCAAGCGGGGCTCGAAAAGCGATGGTGAGAGGCGGCTGAGGACTTGAGAGAAGAA  
CTTCGCTCCGCAGCCGATTGAGCTGCTGACGCCTGAGGCATCTGGAGAGGACGCACT  
TCCACCGCAGGCCGAGGGTGAGGCAGGGCATTGGGAGTTGAAGTTTCGGCCACCGA  
AGCCAAGTCTATGATGGCTCAGATATTTCTGACCGTTGACCGCGCAGTAGACTGATG  
GTGCGCCTAGGCATTTGGCAGAAAGCTAGGATTGTTGCAGGATGTTTCCGCCAAATG

ATCGGAACAATGCCGCCCCGCCATTGGCACCCGGCGCCGAGACTGAGGCTTCAACGC  
CAGCGACAAGGGAGCCCCGCATGCGGGGCTCTTTGCTTATACAGGTCTTAACCCTTG  
TCTTTTCTACTGAGGCTTGGCTAACGCTAAGTTCCGGTGCAATTTAGAGCAATCGTG  
AGCTATTTGGCCTTCTCGATGGAAAAGCTGTAATCCGTCGATGATCCGAAATAGTGG  
CAGCAATAAAAAATTGGTATCATACTAATAACAGCTGAAACCGTCGCTTGATATGAG  
AAAGGATGAGATCTAGCAGTCGACTACTATTTATCTGTGTTGCATCACTTTACACGG  
TCTGACTTTGTGATAATGTATCTTAAAAGATAGAAGGTGCGTGAATGGATAACGAGA  
ATAAATTTGAGCCAAACGCTGAGCAGAAAGTATGGCTCGATAATGAGGTGGCCGAA  
AGGGTCAGGGCGATCAAGGATGGCTCGACGGAGCTGCTATCCGCAGAGCAAGTCTT  
GAGTAAAGTTCTGGGTGGGAGTAATGAAAAATTAAAAAGTCGAATAAAAAAATCTT  
GATATAGTTATACTTCCTGGATTGGGGGTGTGTTGATGCCAGGCTATACCGTTAGTTT  
TGACCCTTTGTTTGCAGCGGATGTGAGTAGTTGGAGTTCTGAATTTAATGGGGATTC  
AAAGGAGGAAAGAGTTTTAAAGCTGATGAGCTTCTGTAGTAATATCGGTAATAATC  
CAAATTTGCTTAAGTATTACGGTGAGGCAAGGCCTTATAAAATTTGTGTTGTTGTTTA  
TAAGCCAGAAGGTGGCGATGGTATATGCGCTGCGGCCTGTGTTGATCATGATGCGA  
ATTCGATAATTTTTATTTCTTTGCGACGGACTAAGGAAGAGGGCGGGAAACTTGGCTC  
GCACTCATTCTTAAAAGCCTAACCTCTTAATGTCTGGGAAAAATTAGCGTGTATCGC  
ATTAGATTGCCACTAGTAATTCCTTATCCTCTGGTGGATAATCGCCCTGCGCGGGAC  
TGCTGTATACAGCATGGATTTAGTACGGGTGCTGGTCTTGCTACTGGCAAGCTACGT  
AAAAATATAATTATTGAAAATCCTGTGGATCATATTCGTGAAGCAATAAGTGGTCTG  
CATGGCGGAAACCTTTTGCCTTCGTTGATTAAAAACAGGCTGAATCTTCTGTCATCTT  
ATAAGAAGCTTTAAGTTTTACGCCGCCTTTATACAGGATTCCTTCCATATGGAAAT  
ACCGTAAAGAACATCCGAGATATAACGCTGCTGGAGTTCATGGTGAGATCTCTGAAT  
TTGGTATAAAAAATGACGCCTGGTCAAATTGTCTTCCATGGCGGCTTGCCGCCACCTG  
TGGGGCCAGTATTTTATCTGGATAGAGTTTTATCCACAACGTTATGTGCAGAGGTTG  
CTAAATCTCATGCTTATCGTGACGGGTACAACCTCAATATTAAGCATATGGGTAATTA  
CCGTTGCTCAAGATTCGATAACAAAGGCGCTTTTCCTCAGTAATCAAAGTAGACAAA  
CCCACGGGCATGAAACTGAGGTGATTATTCAGGCTGGGGCGCGCGTTTCTATTTTGA  
GTGTCTATAATCAGCGTGCATTTAAAATTTATGAATTGCTGCTCCATTAATGGCTGG  
GGCGTGGGTTGGTTTGAGGGCGTGGCTGCTTTATTGCGAAAGCAACTGCTGTGCTGA  
AACAAGAAAGAAGCTTGGTTCGAGTGTTCAAGGTGCCCCGATTTATCCAGGGAGGGG  
TGAGCTCGAGAGCACACAGATGGTTTTTTAACGGCGCAAGGGCTGGCATAACGAGCG  
CAAACCGGCAAGTCTCTAATTCAGGTAAACGGCCATTGAAGCAATAATTCGCAGC  
CGTTTTAAGTCAGGCACTTATGCTTTCACGGGGTGATTCGGATCAGAATCAGCTCGG  
GAGCGGATCAAACGTGATCTGCTATTGCCTCTCGATGATGTATAGCTTGGTGAGCTG  
CATATCCTTTCCTTGAAAGAAAGACGCTATGCCTTAGGTTAGCTCAATGAGCTCGCC  
GAATTTGCTGGAAATTATCAGGGCGACTATCTATACTTGTTAGAACACTCAACAGGA  
CGCGGCCCCGACTGTTCTTTTGTCTGTTAGATCAATGAGTTAGAGTGCTGAACGTTTAG  
TCCCCTCTCTCCGCCAAATCAAGGCGCGTTGTTGCTTGACCACAGCGTTAAGATTTT

CTCGAGATCCCGAAGATCCGAGAAGGACGCAAGCCGGGACATCTTCGACGTCTTGG  
CAAGACAGACGCA

>CONTIG\_93\_length\_5047\_cov\_384.138008

GCGATCACGTGTCCACCGCCTTGTATTTCTTTGATACGCATCGTATGGCCTATACAGT  
CCAGCTGGAGGGGCCACGCGTGC GTGGGGGAACACTGATCTTCGGTGCCGAAGTCG  
CAGATGAGACACTCGGCATCACCAATTCTGGCCATCGAACCGTCGCGCTTGTGCGACT  
GCGAACCTAACAGCTACCTGGTAGGTCTAAGCTTGAATGGGCGTGCATCAATTCCTG  
CTGCACTGCTTACCTTCCCGGACGCTGCCGTTGCAGCGCAGACATTGAGCTCAACCA  
CCGCCCATGCAACCTAATGCCGTTGATGCGCAGGGCGCTTGGCCTGGCAATGCAACTT  
CTGTTCAAGACTGACCGCAAGAGGTTCAAGTATCGCAGCAGCTTATGTGTGGCTATGG  
CCTGCGATTTCGCTAGGCCAGCTCGTCACGATCGAAGACGAAGATGGAGTCTGGAC  
CGGCTACGCCTTATGGGCTTATCTGACGCCTGAAACCGCTAATCATTTAGTTCTGCA  
AGATCCCCCGTTCTTGCCGATTAGTGACTGGAACGAAGGTGATCAACTCTGGATCCT  
GGATTTTCGTGGCTATGCCAGGGCATCACCGACGCCTGGCCAAAGCACTACGGCACC  
GCTTGCGCCCTCACTTCAAGCAAGCGCATCGCTTGGTGCGAGATAAGACGGGCGCT  
ATGCTGGGAACCAAGACTCACACACTTCGCAAAGATGGCTGAGGAAGACACGTTGC  
TTCCTTGATACGAATGGACGAACCGAAGCGACAAGGCAGTTGCAGCCCATGCAGGA  
AGTGACATCAAGGCCGACCAAGGCCTGGACTGGATTTTTGTTCTGGGCTTCGGTTC  
TGGTTTGCCTTATCCGCTGATCGGCAGCACCTTAGGCTATTGGCTCAGCGAAAAGTC  
GTTTTCGATCGCAGTCATCGGTGCCTTGGCTTGGACCGCACTTCCCTACTCCCTCAA  
TTCCTATGGGCCCCGCAATCTCGACCAACGTCATGCGCCGGTCGTTGGAAGCACCATG  
TCGCACCGTCAAGGCTGGATTGTCTTGTCTTCGATCATGGTCGCCCTCTCTCTCCTGG  
GCCTTGTCTTGAGCGTTCGTCTCCGGGAGCCTTCCGCTGGTTGCACTGAGCTGCATCG  
CAGCCGCGTTTGGCGGTGCGAGCCTGGATGCCTCAGTCGATGCGTTTTCGGATCGAAC  
AAGAGGCAGTGCACCAGCAGCCAGCCAAGCTCCTCACCGCCTATCAATTTGGCTAC  
CGCATTGCTCTGCTGCTGAGCGACGGACTGGTGTCTTGTCTCGCAGCGCGGCTGTCC  
TGGCAAGTTGCTTATGCACTTCTGCTGCCCCTGATGTTGGTGCCCATCTGCGGAACG  
CTCTTTCTGCGATCTCATCCCGATAGCGTTCTCACCCAGATCGCGCGCGTGC GAAG  
AAGCAGGGGTCTCCGCTGATATCCCTTCGACCCTCCACGCTCCAAGGATGGATCGCG  
GTGATCGTCTTCATCGGCTGCTATCGTCTACCGGACATTCTTCTGGGTCCCATGATCA  
ATCCTTTCTTCTATGCCCTTGGCATTGGAAAGAATGTGGTCGGATCCCTGCATATCTG  
GCTTGGCATCCCAGCAGCCTTCCTCGGAATTTTGGCTGCAGGCACTAGCTTGAAGCG  
CATGTCCTTGAGCACGACCATCCTTGTGGGCGAGCTCTCCAAGTCCTTGCCCTCCTC  
GTTCTTGCATTGCTTTCTGTCACGAGCAGTCTGCTGAACTGCTTTGGGCTAGCGTTA  
TTCTTCAAAACCTTGCCAGTAGCTATACCGGCATCGCATTGGTTGCTTACATGTCAA  
AGCTGGTCACGCTTGGACGAGCAGGCGAGCACTACGCTTGGCTAACCAGCTTCTACT  
CCATCTTCGGTAGGGTGCTTGCCGGCTTTTCAGGCCTTGCAGTGGCTTATCTCACCAC  
GCTCTATGGACAAAGCCAAGGCTATGGCACTTCTTCGTTGGCATCTGCCTGACGTG  
CATGCCTGCCCTCCTCGTCTACTCGCTCATCATTCGGAACAACCTGAAGGAGCGACC

CGAGCCGTAAGTGCCATCACGCTATTGCCTTGCAATGGCTGTCTCGGCTGTTTACGA  
GAACATGTAATGCTTGAGCTCATTTATTTACGCCGATCCTAATGTCTATCCACCTTA  
GCGCTAGCCAATTAGATGCCTAATTGGCTAGCGCCGGCAAGCCTCATCAGTTTCGAC  
GTCTTGTGAGGCCAAGCAAACACTCGCCCTTCAAACCTCGCCTTTATATACACTGAAG  
TTTCACCAAGATTAGTTTTTATAGAAGATATCCTTGCTAACGTTGGCGATTGGCTCATG  
GGGATTTGGGGGCAAGACATATGGAGTGAGCGCAAATTTTTGCTTGATCTTAGACAC  
TTCATAACAGCGCCCGGGAGCTAGCTCCATATACATAAAATTCACTCCTTTATCGAG  
CTCAGGCGGGACCCTGAACTCAATAAAAGAGATCCCATACTGATCCCGCGTCTTGA  
ACGCATTTGAGCGAAAAGCAATATTCAAAGCTCGACTTGAACCTCACCTGATGGAAA  
TCACGGAGTCCAATTTGCGGAAAGGTCTCATAATTTACCGGTTTATTGGGATCATAG  
ATTTTACCAATCACCTCATCCAAACTTAGTTCTGAATCTTTATTTTCAGCGTGTGCGC  
CCGCACTCACCACCAAAAATAGAACCACAAAGAACGTCAGCTTAATTTTTATAGAC  
ATACCAATTGCCCTCGGGAATTAAATATCTTTACAAATGCCATCAGCCCGCTGGGGG  
ATGCTTACTATCCCAGTAACTCCCATAATATTGCTCATAAGTAATGTCATCAGCGGC  
ATTGGCGGGCGTCCCATTTACATCAATTCGCTCGCCATTTCTGAAAGACTCGCCGAT  
TTGCGTTGAAGCGGCATCCCAATTTATTTGACCGGCAGTGTAGGCCTCATATGTCGC  
GTTATAGGACGCTACATTGGCAGGATCTGCTGGGATATTAAAACTTACGCCCTGCGC  
AGAAAGCTCTCTCTGGACAGCGATGGAATAGATTGTTGCTTCACCTTCAGTAGCTAA  
ACCCATATTGATTGCTGATGCTCGATCTGTGACTGTGTTCCATTCTCCATCAAACAAG  
GTGTGTCCCAACTCGTGTGTCAACTGAGCTGCAGTATCGCTCGGGTTAGCATAAGTC  
TTGATGTATACGGTTCCGCCGCCCCCATCAGCATAATCGGTACGGGAATAGGTATCC  
GTAGTCTCTATCTGGAAACCCTTCGATTGTGCCACTTGAACCAACCCTTCCAGGGTT  
GCTGACTTGTTAACTATGACGTCGACCTCTGCGCCTAGTTCCGTCGTCGTATTCTTGT  
CCGTTGGATTTCGGAAGTCCGCCGCCGCCAGTGCCGGGAGGTGTGATCGGCCCCGGC  
TGCTCAACTGGCGGTGAAGGAGGAATAGTCGGAGGCGGACTCGGAGGTGGACTCGT  
AGGTGGGTAAACCACAATTGGTGGAATCTCAGTGGGCGGCTCGCTTGGATCGACGTC  
CGCAGCGGCCGCTGCACCTGCCACTAGGAACAGCTCTTCGTTTGTCAATTCTCTCAT  
TACAGCGCTCCATCCTGTGAGTAGATTTTTTTCCTGATCGTTTTTTCTATTGAATGTTT  
CATATCTCTTTTTCTTTGAACTTATTTTGATAAGCGTTGTAACCTCCTCATTGTTGACT  
GGACTTCTCAGCCGTTTCTCGGCCCTCGTCCTGTTCAAATTTGCTGGGCTGCTCTTTG  
ATCAAAGGCCTTAGGATCCCACCCACAAAGAGATAGTGCATATCGCACATCCGAGA  
GATGTTCTTGTCGTGCGTCACGATGACTGTGGTCGCGCCGATGCTCCTGATGTTCTTC  
ATCAGCTGTATTCCCATCTGCTCATCAACCCAGTCGTTGGCTCATCCATCAACAAC  
AACTTGGTGCGCCTGTAAAAGGCTCTGGCCAAGAAGATCCGTTGTTTTTGACCGCCT  
GACAGCGTATTTCCCAAGTCGCCGACTCTGGTGTTGAAGCCATTGGCATGCGCTGA  
ATGTCGTGCTGGATACACGCCAATTTGCGAGCCTGCACGAGACGTTCTTGGTCAATG  
TGCTCATCGAACATGGAGATATTTTCCGACAGCGTTCCCGACAACAGATTGTCTCCC  
TGCATGACGATGCTGACCTTGCTCCGGTAGCTCGACTTACCGACCTTGCGCAGATCC  
TCTCCATTGACTAAGAAGTCCCCGACTTGAAGATCTTCAAGCCCCGCCAGAACGCGG  
ATGAGTGTGGTCTTACCCACGCCTGAGTTCCCGACAATTGCAATCACTTGGCCTGCC

GGGGCCCTGAGCTGCAAGGCGCTCATGATCCACTTGTCGGTGGACGAGTAGCGGAA  
GTAGCCGTTAGCAATAGCAATGGCGGGCGCAGCATCCTCCAGCGCGCCGTTACCAT  
GCAAAAACGACTCAGGCTCGCTGTGGGTGATGTCTGAAATGCGTTCTGTGTGCAAAC  
GAAGCAGCCGGAGCTGCATCAAGTAATCGGCTAGATTGATGCTGCGTTGGCTGAAC  
TGGGTTCGCTAGATCAAAAAGACCGTCAGCACCCCGACCGTCATATCCCCACTGAG  
CACCAGCCGGGTGCCCTCCCAGATCACGAAAATGCGGCACAGGCCTTGGATGAGAA  
GCTGGACAGAATCGAACCCAATGCGGATGCGTTTCGGCCCCGATGGTCGCATTTGTCTG  
CTTTTTCGCTGTAGTTTCGTGAAGCGCGACGCCCAGAGCGCTGACTTGTTGAACAGCT  
TGATCGGCTGGATGCTTCGGACCGTTTCGTAGAGCAAGCTTTGTCGGCGTGCATCGA  
TGTTGATCTGATCGAGGTTGGCTTCTTTGAGCTTGGCGTAGTAGGCGTAGCGCGAAC  
CCACATAGGCAAGGGTAAAAGCCAACAAGGCGAAGGCAAGCGGCGCGTCTGAGCT  
CATCAAGAGCAACAACATGAGGAAAGACATCACCCCGTCAATGACCGCTTCCAGCA  
TCTTCGTCGTGAGTGACTGCTGGATGGAGTAGA

>CONTIG\_94\_length\_5016\_cov\_6.603191

ACGCGATTCTCCTGAGATTATAGAAACAGTTTCTCTAGATTTGGAGAAGCGCAAGGC  
TTTTTGGGCCACTATTTTTGCTGCTTTTCGTTGCCTAATTGATGGAATCAACGAGGAG  
CTTGATCGACTTCGAGAAATTGACAAGATTTAGCATAATAGTTGCCCCACCCCATTT  
ACATTGACGAGACAAGCGCTATATATAAACCACAACAATAAAGGGAAAATGAGCAT  
GCACAACAACAGAGACGGAAACAGAAAACCTATTTAGAGCCTATGCCATCTTCTGCG  
CTGCAATTCTCGTGACTGGCCTCTTCATATTGCACTGGAACCAAATATCGAATGCAC  
TACTAAAATAACTGTTCCAATTACTATAACTAGAGTCCCAGCCTCACAATTATCGGA  
CGTTTCAATAATCAATTCTGCCAACTCAGCATCAGCAATTTCTGGCACATTCTTCTCT  
TGACGTATATCATAAAGCCGAGACCTAAAATCGCGACTCACTACAGCACCCTTGCC  
ACCAAAAGTATTCCACTTAGAATAACCACATTAATTAAGCGGAGAACACCTTTCCA  
CTTGATTGGCGATAAACAATAAATAAATAAATAGATAGAGCCACCCAGAAACAAA  
AAGCATCTTTTTCATTAATCCAAGATTACCAAACCAAATCTTGAAAGACACGATGCG  
AGACGAGAAACGTCTTATAATTTTACAGAATCCCAAGCCACTCATTAACAGTCTCCT  
TGTATTTCATAGACCAGCGGATAAGGTTGAATTCTATTTCTCCAATAAAAATGAAAA  
TAATGGGACGAGCGACGAAGATGCTTTTTTCATGAACCAGCCTTCAAGCGCATGTCCC  
TCACTGCTTGACAGTATGCACATAGCGCCACTTACCCTGTGCTTGCAACACTTGCAAC  
TCATCGCCGTGATGAAGTTCGCCAATCAATGCTCCATTAGGTGCATCACGCATTGGT  
GCTCTCTGTGGAGATACCTCAAACTCTGGCTTGCCGCTTGAAGAACCAATTGAGCA  
AAGATCACTTCTGTCAAGAGCACCAACAATGGTTCCTATGCATTTCTAAGCCTGCAC  
GTCGAGCGAGCTCGGGGTGGCTAGCTCCTAGGCTCTTGGGAACAGGGGTATCCAAG  
GTCGCTCAGCAACGGTACCGCCGCACCAGAAGATGGGTAGCGTGTTGTTGGGTGTG  
GTGTTGTGCATCACTACAAGTGCTCCCATATCACCGTGTCCCAAAGGATGAGATGGC  
GACAGCTCGCGCCCGATCTGAGTCAGCACTTCAATCGCAAACCTGACGATCACTCGCG  
CTTGCGAAGATGCCAGAGCGCTCATCGCACGCGCGCAGTTCTTCACCATAGATTGTA  
TGCGCGACAATTTGAATTCCTGGGAACTCCTTCTTCACCAGCTCAAGTGCCTCGCCA

AACGCGAACATGACGATTACCACTAGGCGTCCGGAATGCAGATACCAATCCCACAG  
AGGCTCGGGAATTCGTGCCTTCATCTTTTTGAGCCCTTTGACAAGCGTGCCTCCGGTG  
CCGGCAAAATCGTCGGCGATGACCAAAATAGGTTACCGTCCTTGTGCTGGGTCATC  
CATTGCGCCATGTCATTAGCAGCTCCAATCTTTCCAGCTTTGGCAACTCGATTGACCT  
CTCGCGCCGTTGTTGCACCACTTTTGTGCTCAGAGTCAAGATATCCCAATGCCAGAT  
TGTCGTTACGTGCCTTCACGACCTTCCAACCCAACTGGCCGATGGTTCTTCGGTGAG  
CCTCAATCATCTCAGCCATGCGCTGGTGCCCGAGTGCGCGCATACCATCATTGATGA  
AGCCGCTTTCCGCAAGCCTTTTCAAAAGAGTGAAGGCCATTTTCGATGCGATTGTCAT  
CGTCGAACTGTCGGAGCCAGGATCGGATCTCCGCCACGTCTTCTGCTTTCCAAAGA  
AGAGCAACTTCTGCGCGGCGGCAAGCAGATCCTCTTCCGGGATTGCAAACGGCACT  
TCTTCCATGGCGGTTTCGAACGCGGCGACCACCTTGGACTTTCGGGCTTTGGAAGCAGC  
TTAGCGTCGTGCCAGACCGGAAGCAGATGTGCAATCGCGTTGGCACCTAGCCACTCT  
CGAAAGATGGGGAGTGAGACCATCCATGGTTCTCCCGCGTTGTTCTGATGAATGATG  
TGTCGCTTCATCAGGCGGGCGCATGCGCTGCGAAGCGTCGTTTCGCTAGCGCGCTGC  
TCCACGCGTAAGCCCAGGCTGTCCTGTGCTTCGATAACTTCTTCAATGCTTTCAAAGC  
GCCCCCCCCAAAAGAGACACGCAGCAAAGTGCGATACAGTTTTCTCCGCTTTGCATTG  
CCTTGTCATAACTATCAAGGACTGGATTATCTTCCCAGAAATGCGAAAAGTTTGCAG  
GCCCGAGCGAGCTGAGAAGATGCTGACGAACTGCATACGCATCGTTGATATCAATG  
TAGGTGCGGAATTCCTTCAGACACCGAAGCATCAATTGGTAGCAGAACGTATGCAT  
GTAGAACGGATTGCCTGCCGCATAGTCGATGATGAAGTCGATCGCCTCGGAGCTAA  
ACTCGATTGAGCCCGTAAGCGGATCAGCGATAAGTGCGCGACAGTCCTCTCGGCTTG  
CGATGCGATCAAGTCGCTCATTGATCCACTTATTGAGATCTGACTGGTGTCGGGTAA  
ATATCTCGTCCATGCGCTCGCTGCCAACGAAGAAGAAGGTTAGACCCGCTTCCGAG  
ACAGAGCGCAATGCCTTGATGAACTGCTTGCCACGCTCACCCGTATATAGAGACGG  
ATCCAAATCATCGAATTCGTCAATGATCACTACGAATTTCTGATCAGGATGCGCCTC  
GACCAAGTCGTCTACGAAAGGAACCAGCCTACCGAGACCTGCACCGAACTCAGCCT  
CCTCGGGAACGTCCGTTATCGACATTTTCTTTGCTAAGCGCGTGGCAATCAAACGCG  
CGATTTGACCTTCGTGTAGAGCAGAAAGTTCTCCCATACGAAGGAGAATGCAGACG  
GCGTCTGCGCCTTGTTCCAATGTTGTACTGAGAACTTGCAAGCAAGGATGTCTTACCG  
ATGCGCTTTTGCCCCCAAACAAAATGCGACGTCCGCGCCATTGCTGCATATTGAAGA  
GCGCTCAAGGTCCCGGCCCTACCGTAGAGACGCTCGGGGCGTTTGACGGGATTGAT  
GCCGTACGGGCTCTCCTTCTTCAGTGCGTTCCAGTCCGGCACGACCATTGCTGCTCG  
ATCCGAATCCGCTCCTCGAACACCAACCGCTTCTCAGCGCCGTTTTTGCAATTCCCAC  
GCAACCGGGATCTCGATCATTTCCACGGGCGTAGCGACTCTGAGCGAAAGTCGAAC  
GATGCGCTCTTACCAGCAGGGATCATGAAAGGTTGGGCGGGATCGACACAAGCAA  
GCTGGACGTGCGCTTCGCACGTGGTGAGCCACACCTCTTGGGCCGTCCCTTTTCCATT  
GTTGACCAAGGAAAACGATAAGTGCTTCTCCACTGACTACCAACAAGGTTTGCCTT  
AGTGTGCGAGTTGCGTAGTGCAAGCTGCGGGGCGAGCGCCGTTTCCCCCGCAAGC  
TTGCTTCTTCTACGAGACTAATGAGATGGTCGACCACCGGCTGGGTGAGCTCGCGAC  
AGACTCGGCTCTGTTGCTTTGGATCGTCATCGGCGATGCGTCGCTGCTGCACATTTG

CAAATACTCAGGTGCCCTGCGGATAACTTCCGCGTCCTCGTTCCGCTCGTACGCTTC  
ACAGAGCTTGCGGAAAGCCGGGCTAGCAGGATTGTCAGGTGCGCAACCATCTGCT  
GGTCGTCAGCGACCAACAGCTTCTTTAGGCGCGCCAACGCTTTCAGCAGATCTACTG  
CAGCGATTTTTCGCAGTGACAGGTGTAGAGCGCTGGAACCTGATCGCTGCCGATGAG  
GCCTGGGAGATTGACTCTTCAAACCTTGGCAGAGGCAATTTTGATCGCTCCTGCCGGA  
GATCCTTCATCTGCGCCAAATGCCTCTGCCAGCCCCGCTCTGATGTTGTAAGCAAAT  
CCATTGACTGCATCGCGCAGGTCTTCGCCTACATTCCCATAAGCCGCAAACACGTTG  
ACGAATGCCACTGCGATAGCTGTCTGGGAGAGACCATCAGTAAGCGTTGCAAGCTC  
ACGAAAACCTCTCAGGAGTCTTTTGAAATCCTGACGGAGAGCTCCAAGCCAGCACCG  
CTTGGGCTAAGCTTTGCTCAGCCTGGTCGCTGTGCGCATCCCGAGCGCTTGCAATCA  
AGAGTAAACCGACTGTGAATCCATCGCCGCGATCTCGCGCGTCAGCAAGCGCGTCT  
AATTGGACTGGGTTTGAGCTCTCCAAGCTTGGTGAAAGCAGATCCCCCTTAGCCGCT  
TGCAATGAGAAAAATGCACTGAGACGAGCATTGACGCGTATGTTGAGCTCCCGGTT  
CCACTTGGCTTGACGCGTTCTGGGAAGATAGGAGGTTCCGAGGCCTTGTTCTGCCA  
ACGCTGTGCCAGAACGAGATCCGCAGCACTCAAACCTCTTAGCCTCATCCTTGACGAA  
ATCGGCACGCCATTCAGATAGCTCAGTTGCCGTAACCTGTTGGGAGAGTCAGGAAGC  
GATCACCTTTAACTTTTTTCGCGAGCAAGTCTCGAATCTGAGTCCCAGACGTAGACTC  
GTCCGCTCGCATAGTCCATTGCGGCTCGCCATAAGTCCTCACGAATGCGACTGGAAG  
GGGTGGCGGTCTCGATCAGCGGCGCTATCACAATGGCCTCGCTCTTCAGCCCCTCAG  
GTGCGTTTCCAGTCCCACGAGAAAAAGAATAGGTGTCTGTTCTTCGACCTGGTGCA  
ATTCCGGAGACAGCTTCGCTGCAAGCTCAGTCATCGAACGGGCACCATAGCGCTTA  
GTGTGCAACTGTCTATTGGTCAGATATAGGAGTCTATTTTTTCAGTGCCCCAAGTTCCA  
TCCGCCCAGACCCACCCTTCTGCCGAGCGGCTCTGAAAGCGCGTTCGACAAAATCAA  
GCAACTCGTCCCTATGC

>CONTIG\_95\_length\_5015\_cov\_67.990998

ACGCATACCACTGCTGCAGCAAATGAATCCGCAACATCGTCGCCAGTGCGTATGGCT  
GCCGACCAGGGCGCCCCGACACCGGATAGTGCGGCGCGATCAGACCGAGCAAGTGC  
TGCCACGGAACCACCTGCTCCATCTCGGCCAGAAAGATCTCGCGCCGGGTCTGCTTG  
CGCTTGCCCAGGCCCTCAGCGTCACCGAACGTCAGTTGCATGGATGATTCTCACC  
TGTGGCAATAGTGTGCGCATCTGCTGTGCTTCGTTTCTCAGAAAGTTCCTAGCTGATAC  
GTAAATCGGAGCTTGATCTGCTGCTTGATAGCTGCTCGAGATGCGCTTTTTTATCTC  
AAATGCACTTTATGAGCCACGACCAAAACGTATTAATTTGGTTTTTCGTTAAGGGCGT  
AAGTGTACGGAAGTAGGATTTGTTGTACCTCTGTGTTTCGCTGTTTTTAGGCTTATTT  
CCAGCTGAAAGTAGGTTGTCAACCGATATGGGGGTGCTTGGCAACAACGCCAATAT  
AGAGCATCTTGGTATTTGAGAAATTTCCGTGATGTTTGACCAATGGATTCTGAAGTC  
ATGAGGATGTGCATCTACAGAAACCAACCGTAGGTACATGCACTCCTATGACAACT  
GAAGAATATCTACTGCAGAAGTATGGGCCGCTTATGAAGCTGGTTGACGTTGCCGCT  
CTCTTAGGGCGTTCTCCCGACGGAATGCGTGTAGCGCTGTACTCGAATAACGAGGTT  
TCTCGAAAGCTCAGGCCCAACATGTTGCGTGTAGGGAGGCGAGTCTACTTCCGAACG

CTTCAAGTCAAGGACGCGTTGTTACTTGACGGAGAAGTAATACCTGCCAACAGCGTC  
GCAGGCTAGTCTGGTCATGAGCGAATTTATCAGCATCAAGCGCCGCACCTACTCGGC  
AGTGCCAGATGACATCTTGACCGATCATCGAGTGGGATGGACGGCGCGTGTTGTCCT  
ATCCTGGATGCTAGGGAGAAAGTTCTGATTTCAAATTGAATATTTGGCATGTACGTAA  
GACCTTCAAGTTGAGCGAGCAGCAGTGGCTTCGCGCTCGGGGAGAAATGCAAGCTG  
CTGGCTACTTCCAGCAAAAGCGGGTGCGTGATTCGCAAGGGAAAATAAAGTGGTTG  
CAAGTTGTTACAGATACACCTAAGCAGCACATTGCTACGACTACGTCAGACCCTGAA  
CCATACCCCCAAAAACCGGGGTATGGGCGTCCAAGCCATGGCGACTCATCCAATGG  
CCTGTCAGGCCTTGGTAGACAGGGGGGTAAACCAAGTGTAAGTAGTACCAAGAAGA  
GCAGTACCAACTTAATTGAGACTATTGATGAAAAACCACTACAACCCACTGCGTGTA  
AGGTCATCAGCGGTAACGAACCTTGACGACACAGATGCAGGTGTCCCGGCTGGAAGA  
GAACTTGTGTTGGCCGCACTCCTTAAACACGCCACAAAGGCGTGCAATTGGAAGTCTG  
ATGGCTGGAATCGACTTTGACGAAGCACAGGTTCTCTTAGACGAACTTACCGGAGTG  
CTTTCGACCAACAGCATCAAGACCACCCAGAACGTTGGCTAAGAGCCATCGTTTCG  
CGCTACGAGAGAGGTGAATTTGAGCCGGTCGCTGGAGTGGCGGTATCGGAAGCAAG  
AAGGAAAGCGAGCGAGAAGAAAGCGATTGAGCCAGTTCGTAGCCTTCAGCGATCAT  
CACCAGGGGCCAGCAAGCCGTACATGGACCAGATAGGTGCAATGCTTAGGGTGAAA  
ACGTAAAAGCTAATGATCACCACGACGCCTGATAAATCTTTATCTTTTCGTAACCTC  
GAAGACTACTGTGACAGTCTGGAAAGAAGAGGGGAAATTCAGGTGATCTTATATGC  
CGAACGAAAGAGGGGATACGCCATGCGTATCGATGACGGCACCGAATCCCGAGTAA  
TTGTCGATAGTCATGGCATGCAGCTATGGTTCCGCACCGTCGATCAGGCCTTGGAAG  
ATCTGGCGGATGTGCCGTATTTGAGCGAAAATCTAATCATCGTCCGAAGCAGCTGGT  
AAAGACGATACGTTTCCAAGACCCTGGGTGAGTTGCCCAAGAACGCTTCGTGCGT  
ACCGGGTGCCGGGCTGAAAAGAAGGCCCTGACAGCCAAGAACAGAATGGCCGCAT  
AGTCAGCCCACCGCCATACAGGCGCGGCTACGGGGGCTAAGCCCCCTCTGACCCTG  
CCGGAACAGTCGGCCTCGTCCTCCTAACGCAATAGGAGTGGCACTCATGCAAATCAT  
CAAATCGCTTCTTCTCGCCGGCCTGCTCATGTTCCGGCGGCTATGCAAACGCGCAAGT  
CCCTGTGACGGTCACTTCAGACCTACCTGCGGTCACCAATCAAATCGAAACAATGGC  
GAAGTGGAAGACGCAGTACGATCAAATGGTTCGGTCAGCTCAACCAATGCAGAAGC  
AATACGAAGCAGTCACTGGCCCGCGTGGTCTGGGTCAGATCATGAACAACCCTGCG  
CTGCGCGATTACCTGCCATCCGATTGGCAGAACGTCTACGACTCTGTGCGCAGCGGC  
GGCTATAACGGGCTTAGTGGCAGTGCGGCAAGCATCTACAATCAGAATAAGATCTA  
TGACGCTTGTGCTTCGGTGCCACAAGCCGATGCGCGCACAGCCTGCCAGGCGGCGG  
CCGTGAAGCCTTCTCAGGACAAAGCCTTCGCAACAGCTGCATATGCAGCGGCAAAA  
TCACGCCTGGATCAAATAGACTCCTTGATGCGCCAAATAAACCAGACGCAGGACCC  
AAAATCTATTGCTGAATTGCAAGGGCGGATCGCGTCGGAGCAAGCCATGATCGCCA  
ACGAGCAAATTAACCTCAGCTTTTTTCAGGTAATGGCACAGGCTGAGGACAAAATT  
CAGGAGCAACGTCAAAACGAGATTGACGCAAAAATGAATGCGCGGCGCGGATTTTC  
CCCGTTGAAGCCGGTCGAATTCTAAGGAGGTTATATGCTGTACTTCATTGAGCTAAT  
GCTGATTGCTGGATATATTCAACTCCCTATTCGGTCTGGCTGTCAGTCCGAAATTTT

GGAATTTCTCGTTTCAATGATGCCTTGCGCGGCGACGCACACATGTTTTGCCTAGAT  
ATATGCGGAATTTTTATTGCATTATCTGCACTTTACTGGATCTTGTACGGTACGCTTG  
GAGTATCTATTCTTGGCGTCGAGAAGATCACAGACTTGGAAGCAAGTATAGTAGCG  
TTCGTGTTGACAGCGTCGTTTATCGGGCTTGCGTTCATAAATGGCATAGCGCGTTTTC  
TAGATGCCACACGTGCCGGCATGCCAGAAGCGGCACTAAGATGGCTTGCAACACGC  
CAAATCATCGTTGCTTCGGAAGTTTCCGCTTCACTCGCGCAAATGCCGCGCTCTACT  
AAGAGAATTTAACCATGAAAAAATTCATCTATGTGTTTTTCGCTCGCCTTTCTTTTGGC  
TGGTTGCAACAACAACGAGCCAACCCGCACTGTGCGAGATTTCAAAGCCGACAAAG  
AGCAACGCAATGCGGTACTGGCGGCCTGCAAGAATAACCCTGGCGAAAAGTCCCTG  
ACGCCTAATTGCGTTAATGCGGATCAGGCTGAGACCGAAATAATGAATGCAAGGCG  
CGGCTTTACCCCTTTAAAGCCGGTAAAGTTCTAGAGGACACAGCCATGTCAGATAGT  
ATGATTTTTTCAGTTCATAGGCGACTCTATTACAAACGCGATGGACGTTTATGTAGAG  
TCAACCGTTCCCGCGCTTATCGAAAAAATTACAGCGACTGCGGTTCTCATGGGATCG  
CTTTACTACACCATAATTGGAATTTTGATCAGCCTCGGCCGCGTTGAGGGGCCATTC  
TCCCAACTTATGGTTTCTTTCGGGAAATTCGCTTTGATCGGTGCGTTTCGATTGAGCG  
CAGGCACTTACATGGAATTCGTAGTTGCGACCGGCCATGATCTAGAAACTGGACTAA  
CGCAGGCGTTCTCAGGAGAACATGGTGCCAATCCCCTACTGTTTACCAGGTTGTAG  
ACCAGTCGGTTCGTCAAAGGCCTGGATCTGGCACAGGAACCTTGAACCGAGCTTCC  
AATAGAGGGATGACCAAAATCGGCATGATGATCGGTGAATATTTTGAGGCGATAAT  
TATTGCAACGGCAACTCTTCTTATTGCCGTTCTTGGCCGAGCAATGATTGTTGCGTCT  
AAAACGCTACTTGAATTACTTCTAGGCATCGGGCCGCTTTTTATCATGCTGCTTATGT  
GGCGGGCTACCAAGGCATTTTTTTGATAGGTGGTTTGCTGAGGTGCTAACAACCATCC  
TGCAAATCGCTCTGGTAAGCGCGGTTCTGGCATTTGCCATGAAGATCTTCGTTGAGG  
TGGTTGGCGCAACAACATTGACAGATTGGATGCAAGCCCGTTTTTTCGACTGCGTG  
GCCTACTCATCATCACGGTGGTGATGCTGTGGCTTATGTATGTCGCTTACCAGAAAG  
GAGCCGCTCTTGCAAGGAGGCATGACATCGGCAGCGATTACCTTGGGCGGTCTGGCA  
GCTGGTGCATCTGGGATTGGCTCCACTGTAGTTGGAGCGGTTAATGGAGCGGTTAAT  
CCCGTTTCCACTCGCCGCGATCTGGAATCCGGCATGATGGTCACGGCAGGACGAACC  
AATCACTTTGTGCGCCGGCAACACGCTGTGGAATCCGCGGTATACGCAACACGTGCTT  
GATAACGTCGGCAAGAACTGGGGTCGAGCAAGAGGCGGCAGCGTCCAGGGCGAAT  
GATGACACGGCCCCGCTTCGGCGGGGTTTTTTCAGTGGGGCGTCGGGTTGAGCGGAC  
GGAAAATTTAGTCATGACTAAAAATGACCGATCAACAGCGGCTGCAAGCGGCGAAG  
GCGTCAAGAACCAGGGCAATAGCTTCGACGCCTCGACTGTTAAGGCGAAGGGTTCC  
GGTGATGGCGGTGAAGCTAGGGAACTCTGAACAAAGCACAGCAGATGCGCGACAC  
TATGTGCCACAGAGTGAGGAGTCATCCAT

>CONTIG\_96\_length\_5005\_cov\_16.195572

TGGCAAAGCCCTCCTTGACGAACAGGCCCCGCCGCCGGGTGGCGACGGGATGTCGG  
GAGGTTAGAAACCGCTAAGAGTCGGCGGGCGTATTTCCCCGAAGGGTGTGTATTA  
GCCGCCCTCCCGACGCAGGCATCGCGTCGGTTGCGCCCGCAAGACGCTGCAGGCAC

AAAAAACCACCGGTTTGACGGAGGTGGGTACCGCTCTTAGAGGAGTTTCTACGCTC  
CTTGTGGTAGAGATTGCTGCGGGTTTGTGGGATGTCAACTGCCGTGGGTGGCAAAG  
CACTGATCAAAAGCCACAGGGTCTTCGCCGTTTCAGATGAGGTACGAAAATAACTCT  
GGACCCCTTATCCCAAACATTAATGCTTTGAAAATGGATAACCGCTTCTTAATGTTGG  
CATTGAAGTACGTCCCTTTGGAGTCGGCGTTCATAAGCCCAGCATGCTCGCCCTCGG  
GAACCCCTGAATATTCATATACAGATCCATCATTGAACTCTATCTCTAATATCTGGCT  
GTCGGCATCATAGCCAATTGAGCTGATGTTGCTTGAAGTAACTGGGATGCGTTCCAT  
AATATCGTCTCCTTCGGTTGAAAATTAGGCTTCTGAATCCACTACCTTTTCTGTACTA  
GCATTGGGATCTTGTTTGCGCCAAGCCTGGACTAGAGGCCGGTAATTTTCGTCTTTA  
ACCGGTTTCGGTCCATCCTCCAGACCTTATACGCTTGCCACCTTCGCCCTTGGGGACA  
ACGACCATAGGATCGTCGCTTTCGGGACGTCGCCCTCAGGGGGGCGGTCAATCATT  
GCCCTTATTGGCATATTTACTGCTTCGCCACGATCAATGCCTCACCAGTTCGGAGA  
ACTGGAAGCATTGAAAAGATTCTTTTCAGATTGTCCGATGCGCAGGACGTGACTTGG  
GATCGATCAGAATCATTGGTAAGACGCAAGGCGACAACCGTACCGCACTGTGAAAG  
AATAGTAGTATCCACTTCGGATGGCCGCTGGCTGACTAACATCAAGCCAACGCCATA  
TTTCCTTCCCTCTTTTGCTATGCGTCGTGCTGCAACTGCAGCTCTATTATTCGATTGA  
GAGCCAAGGTATACATGTGCCTCTTCAAGAACAACGAGGAGAGGCCGCGCTCTGCC  
ACCTTCTTGCTTGTTTCTACCCCAAAAAATTGCGTCATAAAGAATTCGTAACACGGC  
CCCTATCAAATCATCCACAACAGCGGCAGGAATGCCTGATAAATCGAAAACAGAGA  
TAGGCTTATCTGCGCCTATCCATGCCTCAAGCAAAACATCAAGATCAGCGGCAGTTG  
CTCCATCCTTGTCGGGCGACCACTGGCCAGGGCGGAAAAGAACTGCATGCGTGGA  
TCACGAAGCTTGCTCTCCAATCCATCTAAATGCGCGCGCGGCATGTCTCCATACAAA  
CCTCCATATACTTTTTTCAGCACCTGCTTCGGTAGTGATGGGGCGGAATCGCGGACGA  
ATAAGTTGATCCGCGTCACCAAGAGCTTTGACGGGAGGCGCGCCATCCTCCATATAT  
GCTCGCGTGCTTTAGTTTGGTTTTGATTTTTGCTTACGGTGTGAGTTGCGCTATGCA  
GCGAATACAAGTCGTGCCACAGTTGATAGACGGAGAACGGCAGCGGAGTGTGATC  
GTGACCATGGACTCTGGCAGGCCATGTGCAACACCTGCGGCCTTTGACGCGCGTTTG  
CTTGAGAGCAGCCTCTCTTGCAACAAGGTCAAAGGTGTCCCTGAGACCGATCCCATT  
GTTATTGAAATAAATTCTTCGGCCGTGAGTGCCCCAAAATGGAACATGCAGCTCATGC  
TCACCTGTTGTCGTATCGGCTCCAACCTCTAAATACCCTAGCTTGATCGCCAAAAGCC  
CTTGCGTATTCTCCGTGAAGGTCAAACAGTACGACACGCGCAGACTTAAAGCGTGTT  
TGATCGGAAACTGCTCCTAAGAGATTGGCAACCGCATTCGACTTTCCTGAACCGGTA  
CTACCTACAACCGCAGAGTGACGAGTAACAAGTCGATTTCATGTCCAAGTATGCGCG  
GATTGACTCTGCACTGGCCACTCGCCCTACTGCTACATATCCATCATCGTCACCCGG  
TGCGTACACCGTTTTTCAGATCCGACTCGGTTACTACGTGAACCGAGTCGCCGATAGA  
GGGGTACTGCGCTATGCCCCGCTCAAATTTTGTGCCTCGTCGTCCTTGCCCCAACAAG  
TTCAACTCTGAGCCACCGATTGCCTAGCTGAGGGGCAAGTTCGGGCGGTCTTGGTGC  
AGCTCCGGCACCGACCTGAGATATCACTCCATACAGATCAACATATCCTGCAGGAAT  
TCGAACGAAGCCCCCGACCTGCCCAACTCGGTAAGCCTCGCCTTTAACGAAAAGAA  
GACCGCCGGGAGTACTCTCTGAGAGCTTTACGCTCACGCTAGAACCATTGACATCTT

CCACGGTTCCAAGCCGTGATGGATCTGGATTACCCGGCTGGTTGTGCATCGTAAATT  
CCCTCGCCGCAAAGCTGTTCAAGAAAAAGGCCGAAATAGTGGAATCACCTAAGCG  
GCTTCGCGGTTGCTTCTCCTTAGAACCATCCCCAACCTCGATCTCTTCTTCAGTGAGC  
CAAGGAATGTGCTCGTTGTGCGCCGATGGTTCCGATTCGATACCCGGCCAACTCGCGTG  
CCTACAACGGCTCCATCCCAAGCAAGAACAGTGAGATTGCTTTGCTTTATTGCATAG  
TCCACAGCCCTTGAGTGCTGCGCAAGGCCAGAATACATCAGCGCAAAGCACTGAGC  
ATTCCGATTTCTCTCAACCCATCAAGCAAGACTTCGTTCAAGTGATCGTCAAGGAA  
AGAATATCCACAAACCACTAATCTAGGAGCATCCTTTCCATGGAAGAAGGTCTTTAG  
TCGATCAAGCATAGCAAGGTACGGCATGCGGCGGCTTTGGTCATACTTGAGATGAG  
ATGGAAATATCATCACTTTACCCGCCTCTGCCTCACGGGTCACACGGACGACGCGGG  
TTACTTTCGTCCCATTTACGACTTCTTCGTTCTTCTCCCAATTGATTGATCCGTGGAGT  
TTCCACAACCTCGTCCACCTAGAAGGGATAATATCGTGCTCGATCGAGGCCAAATCA  
AACCAGGGTTTGTGCGATCCAACGAATCCGTCAAAATGCGGAAGCGGATGCTGCTC  
AAATGCTTGCTCGAAGAGAACATCATAGTTTGGAGTGAATATTTACGACAGGTGAGCT  
CCGATATACTCCGCCAATCCAAGACGCAAAACGGTTGTATGCGTTACGATACAGTGG  
CAATGGCTTCCGTATTTCCGTTGCGATTAGCGCGCAAATTTTCTCGTCAAGCTCGCTC  
AAGTCCTTTTTCTGTCATGCCCAAATTTCTGCGCTTCCTCGGCGGTGTGCCAAGGTAC  
GCAGCTCCGTCAGCACGTCTTCTACGGTAGGTTCTTTCCATCTGCTTGTTTGCATTC  
TTCACACAATTCATCCCAGTGTTTCTTGAACCTTCGACGTAGACCCTGGTGCTTCATCT  
GCAGACAACAGCCCCTAGCAATACGTTTCGTCAATTCCGCAACCGCTGGAATCAG  
CACGATGCTACTTTTTCTTCGGCATCATAGACACCTAGAGGGCAGCCAGCCCCAAG  
GAAACAACCTATGCGCTGCTTGTCGTCCTGAAGTACCAGCCGAAGATTTCTGTCCTG  
CTGCGCTGCATCGTGATGGCGTTTAGAGGCGCTATTTTTATAGGCGTAGCAGCAGG  
TGATGGGACAGCTGCATCGCTCGTATTTGAATTTTATAGCCACGGCTTTCAGGTTCCAT  
GTTCTTTATCGTTTGAACAGGACAGAGCCATAAGGCTCAGGCCCTCGATTTTCGCACC  
GCGATTTCTCTGCATCCTACTAGCTGGTTTCTGTGCTACACCGTACGACAGAGCGCT  
GCTGGCTTAGGAATATCACTAATTGTGGCGCCGATAGTGGCAGTACCTGCTTGAGCT  
GCGTAGGTATGATGTTTGTGTAGGGTGCCGTGACCTTCGGCGTAGTCGCCGTTAGGT  
TGGTGGTGCGGCGACGAGGCTCTTGACCTGTCTGGGCGGCCATGACAAGCGTCTCG  
ACGCTCCATAGGTTAGCTCAACATTGTTTCTTCCCCCTGAAGAAATCTGTGGCGTTTT  
TTACGGCTGATTTTAACTACAGCGTGATTCGATCCTCGCTGAGTTTTTGAGCTGCGTC  
AAATGCACCAGCACAACTGTGACTGTACTTAGCTGATTTTCCTTCATCGGCCCTTTGG  
GCACCTTCTCCTGCGGGCGGGCAGAAGGGTTTGGTGTGTTGGGTTATCGACTGTTTT  
TCGCGTTTGACGCGGTGGTTGGAGTTGGTAGCGCGAGATTATTGTTGAGGTCGGTAA  
TCTCTGGGACGTTGCTTTCGGTCACCACACGCAATTGCGCGGCTTTTGTGTTTGCGGC  
GTTGGTCAGCGGCAGGCGTACCTGCGTGGTGATTGGTTGCAGATTGCGTGGTGCCGC  
GAGTGCCGGGAACCCCACTCTTACCAGCTCCTTCCCCCGCCCATCCTCCAGCACCAC  
AAACCCGGCCGGCGCATCGGCATGCCCCAGGCTATGCACGGTCACTTCGATAGCGT  
CCGCAGTCACGCGCACATCGCCGTGGCCGATGCCCAAGTCCGGGCGCAGTTCGACC  
GGGGTGGTGGCTGCAATGCGTTCAAGCTGCAGGACGGTGGTGCGGCCTGCGGGGAA

GTCGATGTCGATGGAGGCGCTTTTTTCGAAAGCGAGCTCTTGCGTCTTGGCGTTGCT  
GTCGAGCTTGCCGTCATTTTCTTTGCTCACGCCTTGGGTGATGCGCCATTGGCCCGGG  
GCGACGTTCCAGCCGGTCATGCTGGCGCGCTGAGGTTTACTGGAGGTGTTGTAGGCG  
ATGACGGTGAAGCGGTCTTGCTGGGGTGCGGGGATGGCGATGGCTACTTGGATGGC  
GGCCTCCGGGTCATTGAAGCGCCAGCTCACGGTGTGGCCGGGGTAGGT

>CONTIG\_97\_length\_4903\_cov\_11.550042

TTCGGTCCCTGGTGCCCGCGTTCTGGGGTGTGGGCATCTTGGCGCTCTTCTTGGAAG  
GCTGTGCGCTGATTGCGCCGCAATATCTAAGACTGACCATGGATCAGGTGCTCAGCG  
TCAAGGACGATGGTCTGGTCACCACATTGGCTATCGGCTTTTCGATCGTGCTCCTGG  
TCCAGCTCGTCTTGACCGTTGCCAGGAAGTGGACCTTGCTGTGGATCTCTTCGACCA  
CTAGCTTACGGTGGAGCAGCAACTTGTTCCGCCACCTCGTGTCGCTATCCCAGTCGT  
ATTTTCGTAAAGCGGCACACCGGGGATATTTCAAGCCGCTTCCAGTCGATCTACTCCA  
TCCAGCAGTCACTCACGACGAAGATGATGGAAGCGGTCATCGATGGGGTGATGTCT  
TTCCTCATGTTGTTGCTCTTGATGAGCTACGACGCGCCGCTTGCCCTTCGCTTGTTGG  
CTTTCACCATTCGCTATGTAGGTTTCGCGCTACGCCTACTACGCCAAGCTCAAAGAAG  
CCAACCTTGATCAGATCAACATTGATGCACGCCGGCAAAGCTTGCTCTACGAAACG  
GTCCGAAGCATCCAGCCCATCAAGCTGTTCAACAAGTCAGCGCTTTGGGCGTCGCGC  
TTCACGAACTACAGCGCGAAAGCCACCAATGCGACCATCGGAGCCGAGCGTATCCG  
CATTGGGTTTCGATTCCGTCCAGCTTCTCATCCAAGGCCTGTGCCGCATTTTCGTGATC  
TGGGAAGGCACCCGGCTGGTGCTCAGTGGGGACATGACGGTCGGGGTGTTGACGGT  
CTTTTTGATCTACGCGACCCAGTTCAGCCAACGCAGCATCAATCTGGCCGACTACTT  
GATGCAGCTCCGGCTGCTTCGCTTGACACCCGAGCGCATTTTCAGACATCACGCACAG  
CGAGCCTGAGTCGTTTCTGCATGGCAACGGCGCACTGGAAGACGCTGCGCCCGCCA  
TTGCAATTGCCAACGGCTATTTCCGCTACTCGTCTACGGACAAGTGGATCATGAGCG  
CCTTGACGCTCAGGGCCCCGGCAGGCCAGGTGATTGCAATTGTCGGGAACTCTGGC  
GTGGGTAAAGACCACACTCATCCGTGTTCTGGCGGGGCTTGAAGATCTTCAAGTCGGG  
GACTTCTTAGTCAATGGAGAGGATCTGCGCAAAGTCGGTAAGTCGAGCTACCGGAG  
CAAGGTCAGCATCGTCATGCAGGGAGACAATCTGTTGTCAGGGACGTTGTCAGAGA  
ACATCTCCATGTTTCGATGAGCACATTGACCAAGAACGCCTCGTGACGGCTGCGAAAT  
TGGCGTGTATCCACGACGATATTCAGCGCATGCCAATGGGCTTCAACACCAGAGTCG  
GTGACTTGGGAAACACGCTGTCAGGTGGTCAAAAACAACGGATCTTCTTGGCCAGA  
GCTTTTTACAGGCGCACCAAGTTGTTGCTGATGGATGAGCCAACGACTGGGGTTGAT  
GAGCAGATGGGCATCCAGTTGATGAAGAACATCAAGAGCATCGGCGCGACACCGT  
CGTCGTGACGCACGACAAGAATATCTCTCGGATGTGCGATATGCACTACCTCTTCGT  
TAACGGGAACTGAGGCCCTGATCAAAGAGCAGCCAAGCAGCTTTGAACAGGACA  
ATGCAGTGGAAACAGCTGGAAAATCCAGCCAAGGATAAGTAGTAATACTTGTA  
GTAATTCAGAGAGAGAAGCCTTATTGCGAATCAAATAGTAGAAATGATTGGATCAA  
AATTAAACGCACAGGATGGAGTGCTGTAATGAGAGAGCTAACAATCGAAGAGCTAT  
TCCTAGTGGCAGGTGCAGCAGCCGCTGCGGACGTCGATCCAAGCGAGCCGCCCACT

GAGTTGCCCCCGTGGTCGTTAATCCACCTCCATCAGAACCACCAACATTGCCGCCA  
ACACCGCCAGTTGAGCAACCTCCACCACCGCCACAAGGTGGAGGAGGGGGCAACGA  
TGGTGATGTTTTTGTCCCGCTGGCTGCTGAAAACAGAATCGATAACGCCTTTATTGA  
TAGCGTCGAGGGCGGGCAACAGCTAGATGCATATGTCCCCACCAATAACGGCGTGG  
TCATAGATCAGAGCGGAGTAACTGTGGCAACTGGAGTCGATTTGGGTGGCCAACT  
ACCGAAAGCCTTGCCGCGCTAGGTGTGGATCAGGCGCTTGTTACTACGTTGACGCCC  
TACCTTCATCTAACAGGACAAGATGCGCTGAATGCCGTTCAAAAACAACCTCTCCAC  
ATCACCGAGGCGCAGGCAGATGCGTTGGATAACGCAGTTCGATCAAACATTTTAAA  
TACGGTTGTTAATAGCTATAACAATTCTTCCGATTATGCTGACTTTTATCAGCTGCCT  
GGTGGCGTCCAGACCGCCATCGCAAGTGTTGCTTACCAATACGGCCCTGGCCTTGCC  
ACAGCAACCCCCAATTTCTGGACCCAAGTAACAACGGGACATTGGCAAGATGCTGT  
TACAAATCTGAACGATTTTCGGTGATGCGTATGATACAAGGCGAGACAGGGAGGCCG  
CCCTTATTCAACAAGATATTACGAACGGCAGCGTGCCGGGTGGCGGTTAAGTGTTGA  
CTTATAACGTGAGGTTGGAGATGAAGGCTAACAAAAGAATTGCATCAATTGCAATA  
ATGATCTTTTCATTGTGGGGAAGCGTTTTGGCCACGGCTGCGCCTGCCAAGATTAAT  
TCTGCGGTCTATCGGCTTACTTTGGTCAGTCAGCAGGTGACTATATTATTCCCGGAA  
AACCATTGGTGCAGCAGTTTGGGGAGGCTCTGAGCGGTCCACCCAACAAAGACGTT  
GATGTGGGGAATGGGGTGACCTTAATATCCGGCTGCCGCTACAAGAGCTGCATTGA  
GAAAGGTGCAGTTGCGATCAAGAGTGATAATACGGTCGAAGCTGCTGGGCTCATTC  
ACTTTAACTGCAAAGCCGACACCAAAAAGTCGGGCGCTTCTTGCTCAAAAAATCCC  
ACTTTCACCTTATTTGTGCCCAGGAATAAAAAGAGCCTCGACGCAGAGATTTCTGTT  
CTGAGATGGGCACATGAATATGCGCCAGATGCTACTTTTGAAACGGTCACGTTGGAG  
AAATGAGGTTTGCATGCCAAGAGTAAGAGGCCAACAGAGGTAAATTTATCTTCAAG  
TGCTTCGAGTCTGCCTAGCTCTAATTCTATGTGAGCCGGGCTTGCAATGGACTGTTAT  
TTATGGGCTGCATAGGAAGTAAAAAATGATGTTTTGAAGGAAAGGAAAGCGAAAC  
AGCAATTTATCAATCGAAATATTGCAGGGAGTGCTGTAATGAGAGAACTGACAAAC  
GAAGAGTTATTCCTAGTGGCAGGTGCGGCAGCCGCTGCGGACGTCGATCCAAGCGA  
GCCGCCCCTGAGTTTCCACCAATTGTAGTTAACCCTCCTACAAGTCCGCCTCCAAC  
TCTTCCCCCTTCGCCGCCAGTTGAGCAGCCAGGTCCGATAAATCCCCCAGGCGGCGG  
GGGTGTTGGTCCTACACCTTCGCCAGCAGTAGTGAGCGGGCTTGGAAGTGGTGTGGA  
TGAATATATCAATAAAAGCGACGCGGTAAAAAATCTGCTATCGCAATATGTTGCCA  
GCGATAGACATCCCCTTTTAAGGATCTTGGTGCTCTTAAGGGGGATGTTGAAAGCG  
GCCAAATCTTTATTGACGACAATTACGCGGGAACAACCTTTGGAGGCTGCAACAATTC  
TTAGCCATGAGCTATATCATGTTTACAATCCTGTTGATTACGGGACTTCCAGTCCTAG  
CTTGGAACAGTATGTGAATACTTGGCTAAGCAATGAAGCTGGCTCATTGGTTTTTTGA  
GCTGAATTTTGTGAGCCAAGTCGAGCCGACGACGCTGAATCAATATCCAGCTGAAGT  
CACAAGCATTATAACCAGATAGGGTCGACATTGACACAGGAGCAAGCAATGAGTC  
AGCTCGCGACGTGGTATGGAAATCAAGATCATGGCGGAGGGCAAACGGTGAAACAG  
TATTATGAGTCTGTATACAATGGTAACTGAGAGGGTGGTATTTATGAAAGCGTTTAA  
ATTCTATAGAAGTAAATTAATTTGAGTCTGGCTGGACTGCTGGTTTTTGCAGTTGCA

TCCCCGCAGGCATACTGTGCCGAAGAGCGAGTGGAAAACTTGTCTCCTTGTTTAAT  
GGGGGTGGTTACGTCAGCCAGAGCCAGGTTGAAGCTCTGGTTGCAGACGCCAAAAC  
GTCTATCCTCAAAGATGAAATGCTTCATCGTTATTATAAGGTCTCATTATTGCGCCA  
TCTTCGCAGATAAAAGAACTTAGATTTGGCTCACATCGAGGAGACGCTAAGAGCCA  
GGAATGGACAGTTGGTTCGCTGTCTGCTTTTTTTTCAGATTCTAAGATGGAAGGCTG  
CGAGAGATACGATAGTTTTATTAATAATATGGGTTTCGTTGAAAAAATGCGAGAAC  
CCAGAGCGTCAATCAGAGGCGCGTCTTGACTCGCCCGGCTATCCTGTCCAAGGGG  
CCTTACGTCATATCGATATCCACTACTGATGTGACTTCACCATGCGTTTCTTCACTGA  
CGATTGTGGAAGAAAAGAATTATCCAAAACTCAGCATTGACAGTCTAGTGAGTGC  
TGCCAGAAGTAATTATTGATTACTTCGATGGCGACTAGATGCGCTAGGGACTGGCTA  
CTATAAAATGGTCGTTTCAGATCTTTGGATTAGGGCCTGTTAACACTAATGGCCCGA  
GCGATTAACTATTGGTCATGGAGATCACGCCAGCACAATTTTCTCTGATCGAACAC  
TGCCTGCCGGCGCAGCGCGGCAATGTCAGCATGACCAACCTGCAAGTGGTCAACGC  
CATCCTTTACGTTGCCGAGCATGGCTGCAA

>CONTIG\_98\_length\_4902\_cov\_228.312042

GGAAGATCTCCCGGCGAGTCTGCTTGCGCTTGCCCAGGCCCTCAGCGTCACCGAACG  
TCAGTTGCATGGATCACTCCTCAACATGGGGGTAGTGTGCTTATCTGCGGTGCGTT  
GTTTCAAGAGGTTCTTAGCTGTTTCGAGCAAGGTCAAGAGGCGTTTGCGCTCTTGTCG  
TCGCTGCCCAAGTCGCCAGATATGCTTGAGGTGGGGAACCAAGGTCCTTCGAGCGC  
CATGCGCGCGCCTGCGGCACCAATGCCCGCTTCGATTTTCATGCGCCACGAACGTGTTG  
GCGCAAAATTGCTACAAGCAACGATTGCTCAAGGGTCAGGCGTTGCCTGCGGACCA  
AGGGATGGGCCCATTCTGTCCTCTCCCTCCTCGGGCGCGACCACAAGCAGGAACGCC  
AAGCCGCGAATCTCGTCCACGCGCAGGCGCAAATCCATCCAGCGCAGGATGTGCGGA  
CACTTCCGCGCGCTGTAGAAGTGCGGTCCGATAAAGGTTGGGCTTGCTGACCGCTTC  
CAGCAGTCCATACTTCATCAGTTCAAGCAAAGTAGCGCGCACCGAAGAAGATGCAG  
TGTTCAAGGCGACGTCAGTCGTTTCTGGGAGTTGCGCGGATTTCGGCCGTGTCGATGT  
CAGAGACCGTCGCGTCTAGCGGTTCTGTTCTTTCATTACGTCAGGGTTCCCAGTCG  
AATGCCGCGAATGCAGCAGGATCCAGCTCAATTTTCGGCACTGTGAACCTTAAATTC  
TTCTCGTCGCGTGTGGTGAGATTGAGGTGCTCAAAGTCGTCTCCGACTGGAGCGCCG  
ACTTCACGCGCCATGCCGACCCACAAGGCCAACGATTCCAAGTCATGAGTCAACGG  
GATGCGCTCGGCCAACGCAGCCAACTGAGGTGGCGATCGCTGGTCTGAAGGATGG  
CGACCGTATCGCGGACCAAGGCGTCACGGTCCAATCCGTCTAACGATGACCAAAAG  
TCATCGGCGATGGCTTCGATGTTGCCTGACTGCCGCTTCAAATCCAGTTCCCGCAGG  
GCCTCGTGATCGGCAGATTTAAAGCGCAAGCGATCCACCAAGGGCAAACCGCCACA  
AGGGGCAGCCACCGGAGGGAACGGAGAAGGGCCACGTCGGACTGCAGCTTGCCAA  
TCGATCCGCTGCGCTTGCGCCAAGGCTTCGCTGAGCAGTTGCCCCACGCGGTGGTGT  
TCTGCTGCCAAATTCGTGCGTAAGAAGCTGCGCACATCGCGCTCGCTGCGCGATCGG  
GCGCGAATCACAGCGCCCGCTTCCTTGACCAAGCGGGTGACCAGCCAGCGCATGTC  
AGCCTGCTGCAAGGCGCTTAGCGCTGACAAAGCTTGAGGGTGCCGCAAGATGGCCT

GGAGCCGGTGCTTCATGGCTTCCAACCTCAACTTCTTGCTGAAGCTGCTGATGGAATG  
CTTGAAAAACGCGCCCCCTCGGGGGTTTCCAGCAGCTCGTCGTGCCCCGTTCAATAGCG  
CGTCGACAATGGCGCCACGATGCTGGCGTTCCGACACGATCGCATGGCGTAAGCGA  
AGATCGGCGTTGCGCCAGGAATCTTCCACACGTCGAAAATCTGCCCCGAAGGCTGGT  
GGCAAGCGCATAACAGTTCTCGCGCACCTTCGGCCGCTTCATGCGCGTCTGCCGTCTC  
AACACGTCCATCTTCCGCGTCCTCTAATTCCCTCTGAAGACCCGCAATCTGGGACG  
CAAGTGCTCAACGCGGCTCTTTGGATCGGGATTTAGCCGCGCTTCGAGCCGTTCAAT  
TTCGCGCTGCACGATCGCCAAGCGTGAAGCCGTGAGGTCATGACGCGATTTTCCAG  
TCCATCGACGAAGCGCAGCGCCAATTCCAGTGCATCAGTCGCATAGACGCGGCCTTC  
GCGTTCCACGATCAGTGCGCAGCGAATCCAAGTCCTCAGCTCCTTGCGGGCCAGTGC  
CTCGACATCGCCTTCGATCTCAAATTCGGATCGTCCGGCATGTTCCCGCAAAAGAGT  
GGCCAACGCCTGCTGGGCGTCGTCGTCGTCCACCCCGTCTTGCGCGGCTTCGAAAAG  
TGCTTGAGGACACCCAGCACCAACGGCGCCCCGACGCCAGCCAGCAACTGCCAAG  
CGGGGTGCTGGTGCCGCGCCAAAATATAGCTTTGCGTCCGATCGACGCTGCTGCGAT  
GCATCCTCCCCTCCTTACTCAGGTCGTCCCTGCCTTCCATGTGGTAGTTGTCCCATGT  
TTCTGACCGCAAGAAAAGTCGTCAAAGCGAAGATCGGCTGCCGCGACTCACTCCTTT  
GGCTACATCGTGCTGATCCTCGGATGGAAAAGGGGCAACGGTGAGACAGAACGCCA  
TGGGCTGCCGGTCCAGTTCAAGCTTGCTGTGGCACTGAGGTGCGATGCCTTCTTGAT  
ACACCTGCAGTCGGAGGGAGGCTGATTAGCCTGTGTTATCGCGGGTTGGGTCCGCTG  
CATCGGCCGAAAATTGCCCAATCTGGGATCGGACTGAGTTTGGCCTACCGTGATCGC  
GGCGTTGTCCCCGACGTATCATGCGACGGGCACAGGCCAATACCGAGGAAGGAACC  
ATGGAGAGCATGCCGATTTGGGGATGGACGGTCGTGATCGCAGCCGTCGTGTCGCG  
CCTGATCATGTGGCAGGCCTGGGCGAAGGCACGGGATCTGCAGGCAAGGATTGACG  
CGCTGTCCGGGGAAGCTGCGCGCTTGCCCGACGCTATCGAGCGAAGCGGGCGGGCT  
GAGAAGCAGGTTCGGCGAACTGACGGAATCGATCAGGGCGGCGACGGCGAGGGGAAG  
CCGCGCTCGGCGCACAGCTTGAAGAAGCCAGGTTATCCGTGGAGAAGCTGACCGGC  
ACAGTTGCCGAGCGCGACCGGGTACTGACCGAGGTGCGCGAGACCCTCGAAGCCTT  
GCAGCGGACCACGGCAACGACGACGGCCAATCTCGCTGCAAAATTGGCCGAAGCCG  
ACCAACTTCGCCTTGAGCGTAACGGTGCGCGGGAGAGCCTTGAGCAGTCGCGCCAG  
GCCCTGGAGGAGTTGCAACGGTCGGCAGCGGTTATCGACGCTAATCTCACCAGCCA  
AACCACAGAAACCAACGAGCTTCGCCGTGAACGGAGCGACCTTCGTCAAAGCCTCG  
ACGACGCCAACGTCGCCCTACGAGATCTGAGAGCCGAGCACGCAACCGCTGTGGCC  
GTTTCGAGATGCGGCGCTCGAAGCGGTTGAGCAAACCAAAGCGTTTCTCGCCACGGC  
CGAAACCCAGATGCGCACCGCTTTTACCGAAGCGGCGAGCCGCGTCTTTGATGAGA  
AGTCTGTGCTTCTCGACCAGCGGATCAAAGCAAGTGCGGACGCATCGAAGGAGGGG  
CTCGAAACGACCCTCAAGCCATTTGCAGAGAAGGTGCGCACTTTCCAGGCAAAGGT  
GGAACAACTCGGGTCGGAACAGGCCAGGGAGCATGCCACCCTCGTCGGAACCATCG  
GCGAGTTGAAAGGCCTGAACCAGAACATGGCGACCGCGACCGAGGCCCTAACCCGT  
GCACTCAAAGGCAACTCGAAAACCCGGGGTGACTGGGGCGAACTCATCCTCGATAC  
GGTACTTAAAGCGTCGGGGCTAGTAGAGGGGAGCAACTACATCTCGCAGGGACACG

GTGTGGATGAGGACAGTGGCCAGCGCGTGCGACCGGACGTGGTGGTGACCTTGCCA  
GACAAGCGGAAGATTGTGGTCGATTCCAAAGTCAACCTCATTGCCTGGAGCGATGC  
GCAAAATGCCGATTCCTTTGAGGATCAGCAGGAAGCCTTGGTACGCCATACGGCCG  
CACTCCGAGCCCATGTGCGTGATCTCGCGGACAAGAACTACCCCCGCGCCATGGGC  
CCCGAGACTCTGGACCTGACAGTCCTTTTTGTACCCATCGAGGGTGCGTTGTCGTCA  
GCGTTGTCGATCAGTCCAGACTTGCAGACCGAAGCTTTCAACAAGCGCGTGGTGT  
GCATCCCCGAACACCCTGATGGCGATGCTCCGTGTCGTTGAGCGGCTGTGGACACGC  
GACAAGCTACAGCAGCAGATCAGCACCATCGGCGAAGAGGCGGCAAAGCTGCTGG  
ACTCGCTTACCGGGTTTATCGAAGACTTTGAGTCTATAGATGAACGCCTGAAGAAG  
CAGGAGATGCTTACAACAAGGCGAAGAATCGACTTAATGATTCCCCCAGTCCGTG  
GTTGCTCGCGCCCCGCCGTTGGTCGGAGCGGGAGCTAAGGGGAAGAAGGCGCTGCA  
CGAATCGCTGAAACCGCTCCCTGGTGAGGATGAGTCGCCACTTTCACTCGAGGGCG  
ACACTAACGCGTTATTGGCCACAGCTCCCTAGCACCCGTGGATATCGAACAATCAAA  
AGTACACGTCCGAGAATGCCGTCAGTGATGCCGTTAAGCGGGTAACCGGCAAATCA  
CCCAAGGCATACGCGCTATCGAATGCTGCACCCGGTGCGCTGCATGACGCGCGGGG  
TGGACGGGCGCGCCGTGCAATAGCGCCACCTAACCGATGATGAGCTCGCGGTTGAG  
GTTGCCGGTGACCAAAGACCAGATGCCTGGGCTCTTGAAAAACGGGTGCCAAGCCG  
GCGGCGCGATGAACGACACGTCCCGGCCGTTGGTCCAGATGGGGACGACCGTGCCA  
GCAAGGTCTGCTTCGGCCGCGCACGCCTGCAAGGCATCGATGAAATCGGCCCGCTC  
ACGCTGGCTGCGGCGACCGAAGGCGGCGTCGAGCGGGACAATGATCATGTCCTGGC  
CTTGCTCGCGCAGGTGGGCAATCTTGAAGTGAGACATCTGGATTCTTCAGCGTGGT  
GTGAGAGCGATAGCCGCGCTGGGCGCGGCGGCGAGCGGCAAGGTCAGGGACGGCA  
TGTACGAGCCGCTCTGCGCTTGGCCGAAATCAAATTCGTATAGCGTCACACGACC

>CONTIG\_99\_length\_4897\_cov\_5.648847

CTTTATGCCGTGGCTTTTGATTTGCGCAAGCGCGGAGCGCTTGGGGGTCCGGGGGCG  
TAGCACCTGGCGCACGCAATGACGAAGACATTGCCTAAGTGCGCTCTTGCTCTTTCT  
TTTACGCACTGTTTTTCAGCATCGAACAACCTTTTGAGTGCTGGCAATTTTCGAACCCG  
CATAAACTTGACTAGGTGCTTTTCCGTGATTGACTCAAAGACGGAATCATTGGAGAA  
ACGCATGACTGCCACAAGCCACTACCACGACCGCATTGCCCCGAGCCACAAAGCAGT  
TAGCCCAACTGCAAGCGAAGGAGCTTTTAGCCAACCAGCGCACGGAGTTGAAGGCC  
AAGCAAACCGCGAGGCGAGAAAAAGCGAAGCGGCGGCAGAATGTGGCCGACTTGG  
TCTTCTCAGTTGACGCCCATGTGCTGGACGACGACGAGTTAGCAGGAGCGTTGCTCC  
AACACTTGGACGCCCCGAAAGAACTCAGTGTTAGGCAAGCCGCTCGTTTGCGAGGT  
GCCACGCGAGCCGCATTACCAAGCACTTAAAGGGCTCACGATCTGGCAATTCAAGA  
AACGGGAGACGACGGTGGGAAAAAGGCGGACGGCACAGCGCCGCCCTCTTCCCGC  
AAACGCTGTGCTCCTCAATCGGCTGTCAGTGTTTTGCTCACCTTGTTGTTGCCAAGT  
CGACGGCCGAAAGGCTCAGATCCTCGTTAAGGACATACGCCTTCTTGAGGTCTTGGC  
TGAAGACAATGGCCTGCCTTGGGGCTTTGAAGCCCGAAATCGTTCCAGTCACTTTCA  
GCGTCTGCGTGTCGATGACCGACAAGGTATTGTCCGCCATGTTCCCCGAATACACGT

GCTTGCCATCGGGCGTGAGCGCTGCGCCGTAAGGGTCCTTCCCCACGGCAATAGTGG  
TGGTGATCGAACGCTTGGCCGTGTCGACCACAGCCACGGTGTTGCTGCCGCTGTTGG  
CGGCATACAGCGTTTTGCCGTCCGACGATATGGAAATCGCCCGCAGTTTGTTGAAGC  
CGGTGATTTTCGCCTTGAATCGTATTGGTCTTTGTGTCCAGCAAGCTGATCTTGTGCGC  
CTTGAAATTGGTGACGTAAGCAGTTGCACCATCTGGGCTGATACGGATGCCCTGGCG  
AGGCTGCGAGAAGCCAGTCACTACCGCCACCGGGCGATCGCTGTTCAAGTCGAACA  
CCGAGACCGTGCTGGCCGCTTCGTTGTTGACATACAAAAGGCGTCCGTCCTTGCTGA  
GGGTGGTTCCAAAGGCCCGGCACCCAACGGAAGGTCGGCAACCGTCTTAAGCGTC  
TGACTATCGATTTTTCGCGACCACGCCAAGCTGCTATCGGAGACGTAAAAGAACGC  
GCCGTTTCGGTGAGAACACGATGTTTCGGGGCGTGACGTAACCCGATAAAAACCCGCTT  
GGACTTTCCCGCCTTGAGGTCATACACCACGATTTCCGGGGCGCTGACTGTAGGACAC  
CACGGCCGTCGCCTCATCCGGGCTGACAGCAAGCGAGTTGTTGCGGATATCGCCGTC  
AAAGGTCCACCGTTCCTCGGCCGCTTGGGTGCCAGCGATACAGCCATCGCGCCCGCC  
GAAAACCAAGCCGGCAATCGTTTTTTTGTAAACAGGTTTCATCGCATCCTCCGGTTCTGC  
GCGACTGCGCGCGTGATCGTTCTCATCGCAGCAATCTGCTGGACCTCACTACTCTGG  
CCGATGGCGACGAAGAAGCAAAACAAATTATTCGTGTTTCACCGACCTATTTTTTTAG  
GTATCTTCTTTTTTGAGGTCTCGCCCCATTTCCAGGCACTGTTCCCAAGCCCCGGCCAA  
CCCCTGAGAGATGAACCTTGTCGCGGTGCTTGACCAAGTAGAACTGACGGGGCCAACG  
AGGGAAGCACGCCCTCAAGGGCCACCAGTCGCCCCGAAGACAGCAAGTCGCTCACC  
ACCCAACGGGAGAGGCAACTGACGCCGATTCCCTGGACCAGCGTGTTTTTTGATGGC  
CTCGGAGCTACCGATCTGCTGCGTGTTGGCCAGGTCGCTTAGATAGCGCAATAGAAG  
CGCCTCGACTTCTTCCCGGGTGCCAGACCCTTGCTCTCGCAGCAGCCAGTCGGCCTG  
GCGCAGGTCCGCCTTGGTGACTTTCGAGGCCTTGGCCAGCGGATGCTGGGCCCCCGC  
GACGATCAGCAGTTCGTCCGTCAACCAGGGCTCGGCATGAAGTTCCGGAAGATGAG  
AAGGGCCTTCCAGGAGCCCCATGTCGAGTTGGAAGTCGGCGACCTTTCGCGCAATTG  
CGGCGTTGTTGGCCACGTCGGCGTCCACGTGAACATGGGGGGACGACTTGCGCAAG  
TCGGCAAGCAAACGGGGCAAGACGTAGTTGCCGATGGTCGTGCTGCAGCCGATCCG  
CAGGCGAACCGGACGATCTGAAGCGCCGGGACGGTAGCTGGTTTTCAATCTGGCGTG  
CGCCGTCGAGCAATTGCCGTGCCTGCGGCAGCAAGCGTTCGCCTTCGGCATTGAGCA  
GCAACCGCTTGCCGACTCGGTCGAACAACCGCGTTCAGCACGCTCTCCAACCTCGT  
TGAGCGCAGCGCTCGTGGCCGATTGCGAAAGCGCCACCGCGGCGCCGCCGCCGGTG  
GTGCTGCCATGCTCGGCCACGGCGCAAAAGATTTGGAGCTGACGGAGGCTGACCTT  
CATTTCAATCCACCAAACAGGTAACCTCTTACCAAGATTACCCGTTTTTACAGATATTA  
GAAGCCGCCCTAGACTCTGCTCGTTCCCAACGCCCCGCTGCGAGGCTGCTGCAATGA  
GCGAAAGCAAACCTGATGGCCATCATGGGCGGGCACCGGCCCTGGCCGCTCTTTCC  
AACCCTCGCGAGGCCATCCGGCAGTTCACGCCGAACCTGGTTTGCCGCGACCATGGG  
CACCGGCATCCTGGCGCTGGCCTTGGGCCAACTTCCCTTCCCGTCCCCGTGGGCCAA  
GGCCCTTGGCGAAGCATTGTGGTGCTTCAACATCGGGCTCTTCATTTTGTTCAGCAC  
GCTCTACGCCAGCCGTTGGCTGCTATTTTTTCAACGAGGCCAAGCAGATCTTTGGCCA  
TTCCACCGTTTCCATGTTCTTTGGGACCATTCCCATGGGGCTGGCCACCATCATCAAT

GGCTTGCTTCTCTACGGCCTGCCTAGGTGGGGAGCGGATGTGCTCCCGTGGGCGGAG  
ACGCTCTGGTGGGTCGATGTGGCCATGTCGTTGGCCTGCGGGGTGCTGATCCCCTTC  
ATGATGTTACGCGCCAACCTGCACAGCATCGACCAGATGACCGCCGTTTGGCTGTTG  
CCGGTGGTGGCGGCCGAGGTTCGCGGCCGCAAGTGGTGGGCTGCTGGCTCCCCACCT  
CACGGACGCCGCAAGCCAATACCATGTGCTGATCACCAGCTACGTGCTGTGGGCAT  
ATTCGGTGCCGGTGGCCTTGAGCATCTTGGTCATCTTGCTGCTGCGCATGGCGTTGC  
ATAAGTTGCCGCACGAAAGCATGGCGGCGTCCAGTTGGTTGTCGCTGGGCCCCATCG  
GAACCGGCGCGCTGGGGATGCTGGTGTGGGCACGGATGCCCCTGCCATCCTGGCT  
GCCCAAGGCCTCGAGTCGGCAGGAAGCATGGCGGCGGGATTGTCCTCATCAGCGG  
GTTGTTGTTTTGGGGATTGGGATTGTGGTGGATGGTGCTGGCCATGCTCATCACCGC  
GCGTTATCTCCGGAACGGCATAACCGTTCAACCTTGGCTGGTGGGGGTTTACGTTCCC  
GTTGGGCGTGTATGCGGTGACGACGCTGCGTCTTGGTGCCACGCTGCACCTGAACCT  
CTTCGAGATTCTGGGCACCGCGTTGGTGGCGTTGCTGGCCATCATGTGGTGCATCGT  
CTTCGCCAAGACACTGGCCGGCGCCTATCGGGGCAACTTGTTTCGTTTCTCCTTGCAT  
CGCTTCGCTCAACAAGGGGAGCTGAGTCATGCTTCGCGTGGGGCAGCGGGAGCGGT  
CTGAAGGGAGCGCTTCGCTTCGCTCAGGACGGACAAGATGCGCTTGGAATCTCGG  
GGTTGGTGCAGACCGACAGCGGGCTGGGGTGAGGCATGCCGAAGAGGGCAAACAG  
AGGGAAGCTCTCCCTGACACTGGGCATGCACTGCTGGGCGACTCGCCCCGCAAAAA  
CAATGGCGTGAAGCCTGGGAAGGCGGGAAAGCACGTCCAAGAGCATCACCGTCCCT  
TCCTGTAGAACTGCCTTTTTGGGCGGTTTCTTGGCCTCACCCGCCGATGGCAGCCATG  
GCACTGCGTTCCAAAGGAGAGTCTCGTTCCGCGGCAACGCCGCTCTTCGAGAAAG  
CGTTTCAAGTTTTTCTGCGCAGGAACCGGGTTGTCTCGCGACACAAAGCGCGGCGTG  
GCGGCATGGCGAGCGGGGCTTTCCAGCAACACCATCACCCGAGCCTTTTACCCCCA  
TCCAGCGGGTCGAAAAACGGCAGCGCTCGACCACGCTGGCATTGGCCTCGGACCCA  
CTGGTTGAGGCTTCGGACGTGAGCACTGTGACACGCTAGGACGGTCTAAGGTGG  
AATCAGGCATACAAAAGTGAGTGACCGATTTTCATAGCGCCGTTTTGGTATCGCTCA  
AATGCACTTCCTCGTTTTCCATCGGACATGCCATGCCGAAGAGCGACATCAGAGCCC  
ACCCATGGTCATTTCGTGGCCCTTGCTCCTGCTGGACGTTTTGCTGCTGCGTCTGCTCC  
ATCGCCTGCTGGCGGACCTGGGTCTGCTGAATGGCCTCGGCTTGCTGAAGGTTCTGT  
TGCGCCGTTCTTGCGCGGCTTGCGGCCATCGACATGGGCATGAAACATTGGCGCG  
ACTCCCATCCCATGCGGCGCGTAGACCGCAAAGACGTTGTGCGCCCCGTCCTTGCCC  
AGCCCGCCCGTGACCTTGTCGAC

>CONTIG\_100\_length\_4869\_cov\_5.448334

GAGCAACCTGGTCAACGAGCGGGGCATTGCCATCCAGGTGGTGCAGGAAATCACGG  
GGCACGACCTGACCTTGCCGAGCGGCCTTAGGCACTACGTCAATCCGGGCACCATCC  
CGAAGCGCTTTGACGCGCTTAATCTCTACGGGCCGCCTGTGGTTCTGCCGCCCTACG  
TTCCGGGCCAGTTTGACGTGACGTTCAAGCAGGTTCCGCCACATCGAGCGGCGGCGA  
GAACAGGCCGAGAAGAAGCGCCAGACCAAGAAAAGCAAAACCCCCGCGTGAGCGG  
GGGGTTTGGGTGTCGGCGGGTAAAGCAGTTTCTTCTCTAAGCCACCCATAGGGCG

GTGAACGTTTCGATTCATCCCCGCTGACGCGGGGAACTGCCGACGCCCCAACCCCTAA  
AACAGGCCTAGACGATGTCAAGCCATGGATTTGCGGGGCCAGAGCGCCCCGCATTTT  
CCCGGTTTTTTCCCTTGCCGGGCGACGTGGGCCGCTTTGCGTTTTCTTCTTCATGGTTTT  
GCGCAGGTTCTTGCCCCGCGTGTCGTAACCGGGCGGCTTTGAGAAGTTTGTCTGCCGC  
CTTGCGGGCGGCTCGGCGAGTGGCACTGTCCATCGACAGTTTTTTAGCGCGTCCCAC  
TCGATGCGCAAGGGGGCCGACGCGCGCCGATATGCTTTTCTGAAGCAGGAAAAGCCT  
GCACGGGCCTGCCCTTCTTCCCCTTAAAGCTTAGCTAAGCTCCCCTGCTTTGCCCTTC  
ATCTTGGGGGTCGCCTCCGGCTCCCCCGACGATGAAGGGCAAAGTCTCCCCTAGGA  
CCTCCGCGCGAAGCGGCAGGGGTGACTTGGGCCCCGTTGGTTACCGCCCCGAAGGA  
CGGCCCCGACAGTCGGGCGCGGTGATAGAAGGACTACACCGCTACGACGGATTACACA  
CGGTCCAACCGCGCCGGCTCAGGGTTCCGTCACCACTATGTGGCGTCTCTCCTGTGG  
GCTTGCCCCGCTCCCCAGCCGTCGCCGGGGAATATCATCCTAGCTGCCATCCTTGGGC  
CACAAACCGTTGATAGTCGGACCGCGACAGGGCACACGAGTGGGGCCAGCTTGAGC  
ACTCCCCACGCCTCTGCGAAGCTTGAACCTACCTGGTTGGCGCAGGTTGCAGGCCATA  
AAGCGCCCCGGTCCCCCTGCTTCAAAGCCTGCGCACCCGGGTGGCGGTCAACCCAAG  
CCCTTGCGGACTCCCCGATATCCATGTGCGCAGCCGGTCTTTCCACCGACAGCGAGT  
TACGGCTACCAACGGCCTTCGGGCTGGGCAGACAGGGAGGAGAGAAAGGAGGGGG  
GCTTGCGGGTCAGTCCAGGCTTGTTAGAGTGGCCTCAAGGGGCACCGCCTGGGCATG  
TCGTAGCTGTTATCTACCTTGCTCGCCTCCGAGTCGGTCAAACCTCGGGGGCCATGGA  
TTAAACCTATGACGCCTCGCGCCGATGTCAAGCGCGGGGCGTTATTTATTTAATGGA  
GGGAGGCGAACTTGTTAGGGAAAGCTTTAATGCTGCTTATCGTGGCGGCTATGGCCG  
CTTCGTCCATGGGCCCCGCGCACGCCGGCGAAAAAATCACGTGCGCAGGCGCCTCG  
GGAAAAGTTGAATCCCTCAGCGATGACGAACTCCTGCAACAGTGGTGGCTAGCGCA  
GGACGCTTGCCGAGGCAGGCCGGACGATGAGTCAGCATGTGCGAAGCGTGACCGCG  
CTACTGCCGCTCTCATGGCCCGTGGATACGAACAGCACAAACCACGACGTTTGGACCT  
CACCGTCCGACGCGGGGCATTTGCTGCGCTCGTTCAAAGCAGTGACGATTGGGCG  
ATTAATAGAAGCTCTGTGGTGATACTTATGGCGGGTCCAACCTGCGCTGAAGACCTTA  
AGAAATCACCTTTTCGGACGACAAAATAATCGCTCTTTGGAATGACTCGAACGAGTCA  
ATGCGACTCGAGTTCCCGCGCGCTTGGTCCATGCTGAGCCCGCAGATGAAACAAAT  
AGCCATAGACCACGAGGACGAGAGCGACGTTGCTACACTCTGGATTAGCGCCGCC  
CAGGTCGCAGAGCCACAGGTATTCTCCATCCTTCAGTCGTAGCGACTAAAGCAATCA  
TTCTTGCGAGTGTGACCCTAGGCAGGCCTAAGCGAGGCCGGTCCGATAGCTGGTAG  
GAGACGGATGTGCTCGTAACAAGGGTTTTAGGCCCCGTGCCCCGCCTGCGGTCATGGG  
CGATACGGCAATGTAGACGTATACGGCAATCATGTCCTTCGGGGATGCTAGCGCTGC  
CGGGTGTGAGAGCAGCTCTGGCTTCCCCCACTTCGCAAGAAGATCCTATATCTGGAC  
CAACCGTTTTTCAGCGGGGCGTTTCGTGGGGGGGAGAGGAACCGTCACTATGTGCA  
ACTCGCAGACCACATACAACGCGCAGCCTCGGCGCAGTTGGTCACCATCCCCCGCTC  
TTCGATACACGACTACGAGACGCGGCTTTGGGAACGCGGTGACGAGCTCTTGGAGTT  
CATCAAACGAACAAGCCGTGGCCACACATTTGAGAGGGCATACAACGTGCAACGCC  
GGCAGATACTGGCAGGGTTTTAGACGCTGGCTCGCAGGCGAGGTAGCAGCCTATCCG

TTAACCCAGTCCGAGGCGCTTTCTGAGCGAGTGCACGACTGGGATGGCTACTTTGTG  
GTGGGAGTCCGTACCCAGCCAGGAGACAACGAGGCCAGCGAGAGTTCAAGCGGC  
AGTCGTTGGAAGGTTTGCTTAACCTTTTCGACGGCTGGCGGGCGTCTGAGGAAACGT  
TTGAGCAGTGC GTTATCGGAGAGCTGGCCGGAGCGAAAAGACTTTACCTTGATGCCT  
TCCTCACCTACTTCACAAGGGTGGGGCAAGGGGATTTCTCCGCTCTGCTTGACTCTC  
CAATAATCTCGAAGGTGGTGGAGCAGATGCGGCATCTCCTCCCGCCAGAGCAAACG  
TTCCAAGAATCAATGCGAGCCTGTGCTTCCTTCTTCGATTCCGAGCATTTTCGCGCAGC  
TTCCATTCCAGCATGTGCGTGCTTGCTCATACGCCACGCTTCAGAGGATGGTTCGGA  
ACGGCGCTTATGTAAATCTTGAGCGTGCTCGCGGGGAAGCTGAGCGGGTTCTACTCAG  
ATGTGGACCATGCAGCGTTCTACGCACCATATTGCGATGCCATAGCGTTGGACCAGG  
CGATGGCAGAGCTGATGGGTGAAAGAGGAATAGACCTGGAGCAGGCCTTCGGAGTA  
AAGGTGTTTAGCCTGAATCACCTCGAAGAGTTCCATGGCTGGTTGGACGCCTTAGAG  
GCGGGCGTCACCGATGAACATCGTCAGGCCTTGTTCCAACGCGTATCCAGAGTGATG  
CCTTCTTGTTGTTTCGCACGCATCCGCAGCTAAGCATCCCCGTGTCAGGAAATGATG  
CTCAGCGCAAGAATCGCCAGCATCGGAACCATGGCGATGAGCCCGATGAAGCCCCA  
GATGCCGCAGGCCGTGATTGCCCATAGCTGGCCCCACATTGAAGTGACCAGCGCTGC  
GCTGTGCAGCCGCGTATGCCGCTGCGGGTTGGACTCGCTCCGCGCGCCTCCGCAGCA  
CGCGGGACATCACTGGCCCAATGATGAACCCAAAAGGTCCGGTTAACAGAACCGCG  
ACGCAGAAGCAAAGGGTTAGACGTGCCTGCGGGGTCATCACTGAGGTGGTGGGGGC  
TGGTGCGTAGTTCATGGCCGTTCCCTGGGCGGGTAGCGGGGTGCTACCTTTAAGGTA  
GAGACTACCTCAAAGGGAGCGTTGCAGTCATGCTGAAAGTTGGTCTTTTTGCCGGTT  
GCGCACGTGTCCCAATCACCCCCAGCCCCCGCCAGCTTTTCGCCGACCGGCTGAGG  
CAGGCCCGAGCACTGCGCGGGGTGCGCAGCCAGCGCGCCTTAGGTCTGCTCATGGG  
GCTTGATAAGAACCTGGCCGGCAACAGGGTCAACCGGTATGAAAGCCAAGCGCGGG  
GGATAGACCTGGACGGGCTGGGCAAGCTCGCCGAGGTGCTTGCGGTTCCAATGGCC  
TACCTGGTCGCCGAGGACGAAGCGATGGCCGACGCGGTGCTGGCGCTTGCTCAGTT  
GTCTCCGGAGCAACGCGCCAAGGCGGTTGCGGCCCTGCTCAAGGCCGCGGGGACGG  
ACGACGGGGCGGACTGACCGATTCCGGTGGTCGCACGGCTTGGTCCGGGGTCTGCG  
GCACTGGGGGCCACGCCCTGCGTCGGCGCGCGCTCTGCAGTGGGTTTGACGGGCGGG  
AACTGCTTGGGGAACTGCACCAGGAAGTCCGCTGTGGCCAGCTCGAACGCCACCTC  
GGCCTTGTTCTTGGCTTCTCTGGTTCGTATCGCGGAGCTTCCGAGCCTGCTGCTCCTGC  
GCCTTCGCCTGCCGCTTCTGTTCTGCGCCGCTGGGCAGCCTTGTCTTCGGCGGTAG  
GCCGTCCCACCTTGCGCAGCGCCGTGGACAGGAAATCCGCGGGCACCGGGGACGTG  
TTGGCGTCGGCCACGGCCCTGCGCCGGGCCAACCGGGCCTGTTGCCGTTCTTCGCTC  
GCCTGCACATGTGCAGCCCGGCATTTCGAGCAGGTCTGTGTGGGACTTGAGGAGTGC  
GCGAGAGGCAGAACGTTGCTCAGGCGTGCGCTGCTGTTGCCGATTGAAGCGACA  
AGCGTGCCACTTTGAACATCAGCGCAATCATCTCGTCCAAATTTTAGCGGTCTGCT  
CTACGGCCATGGTCTCCCCCTGCCTGCCCTGTGTGTATTTTCGTGACGCGCGCTCAAT  
CGCCGCTGCCCCCTTGCCCTGCTGACCAGCCGCGCCAGCGGCCGGCCGGGGCATGG

ATGACCCGGCTTTGTGCGCAGCGGGACGCTGTGCACGCGCCTGGACGGCGGCCCT  
GGTT

>CONTIG\_101\_length\_4813\_cov\_5.243491

GTTGTACCCGATCAGGGCGTTGATACGGTTCGGAAGCCGACTGCGACGCCGAAAAT  
CGAAGTCGATTGTGAAGGCGTTCGACCGTTGCGCCACCCGCGTCTTGAACCTTGACTT  
TGAACCCTGCGCCTCGCCGTTTCGTCGGGAGGGTAGGCGCACGCAGCAATCGTGCG  
GCGTCACCGATCGTCCGTTTCGGCGCCGCCAAAACGCAACAACGAAACCCGATAGGC  
CTCGCTATCTTCGACGCTGGCCTTGATCTCGTCGTCGAACGCGACATCTCGAAGACC  
TCTGAAGTACGGTTCGAAGACGTCGCGACCGAGTTTATAGATCGTCTCATAATAATC  
GAGGTCGGCACCTAGCGAAGCATGACCGGCGGGCAATTCCTCAAAAGGCCCGTTTG  
GCATTTTCGGTGTAGCCATCCGTTTCGACCGGCCTCGATGATCTTGATGCTGCCGAGAT  
CATAGCTCTCATCGGCTGACACGTGCAGGGTGACGTGGAAGGTGGTCTTATAGCCAT  
AGTCATCCCAGTTGTCCTGTACGAGTACAGCATGGGGAAAGTGATTGGTCGTGGGCG  
AGTCGCCTGACCTTAAATTGACCACAAACCTCATTCCAATCTTCCCCTCGCCGCGTG  
CACATACATTGGTACCACACGCAAGGTCATCGCTCCAGCCTCAATCGCAGGCGTCTC  
GCCCCGTTTCGCGAAATGCCGCCTCACCACCTTCCAGGATGTTCGTACGCTTTGGGTCTGA  
CAGCTGCCCCGTCCCTACCCCGATAAAGATCCGTAATCCCCTGCCCGCCGCCTCCGGC  
GCGATCCGGCATCGGCCGTTTCGTAATGCGACATCGCCTGGATCGGCCTTCTTGTAAG  
TATCCGTGAAAGCGGGGGTGAACCCGTCGGTTGGGAATGGGGAATCAGTGTACTCA  
GTAGCCGTAGACGTGAGCGCATGATCCCGGATCATGTGCTCGATGCTCAGGATTTTCG  
CCAGACAGCGTTAGAAGAGCCCGGCACCTCCAACCTTGAGGCCGCCCATATCAGCCT  
CGCCCTAGGTTTCCGATGCGGGTCTCGGCCGGCTTAGAATGCAGTAGTCAAATGCCC  
AGATCTATCAGTAGGTTCTACTCAGTATCAGCGAGGTTTCGCTGTACTCGGTCTTAG  
ATGTTTCAGCTGTCAACTCGGAGAGATAGGATTCCATGAGTCAGAAGGATGCGACGA  
GCGGCAACGTAAGCGAGCTTCAAGACTACGCGGCATTGAAGAAGCTCGCCGCTGCC  
CTCTGGCAGGAGGAGAGCGCCTACCATGGCGCAGCTGTCCTGGTTCGGGGCTGGCTTT  
AGTAGGTGTGGCGGAAGGTCTGGAACCGCGGATGCGCGTCTTCCTCTCTGGCATGAC  
CTGTCCAGAGTCTTGCGGAGTGAGCTGAAGACTTCGAGTGGCTCAGATCCGCTGAGG  
CTCGCCGAAGAGTACTGCGCTTACTTCGGAAGACAGGCGCTTTACGACCTCGTGACT  
AAAGAAGTCAACGATCTGTTCGTGGACGCCAGGCAACCTGCATGAAATTTTGCTCGA  
GCTTCCGTGGTCAGAGGTGCTCACGACCAATTGGGACACGCTCTTGAGCGTGCATC  
TCGTGAGGTGCATCAGCCGAGCTATAGCCTGGTCTCAAAGCAGCAAGATCTGTCTGA  
GCGTGCGGTTCGCCCCGCATCGTCAAGCTCCACGGCACCATCAATGTCTCGGATGATC  
TGATTTTTACGTCAGAGGACTACCGACGATATCCGCAGAAGTATGCGGCTTTCGTTA  
ACTTTGCCAGGCAGGTCTTCATCGAGAATGAGCTGTGCTTGGTTGGCTTCTCTGGCG  
AGGATCCGAATTTCTTCAGTGGGCCGGCTGGGTGCGCGATCATCTGGCAGCGAACT  
CAAGAAGGATCTATCTCGCTGGCGCCTTGAACCTGACTGCGGCAAAGCGAAAGTAT  
CTCGAGTCAATCAACGTAGCACCCATCGATCTCGGCGGGCTCGTCGACGATTACGAC  
GATCCAGACGAAAGGCATGCAGTTGCCACCGAAAAATTCCTGAGCGCTCTGCTGTAT

CTTCGTCCAAAGCCGGCGTGGGAGTGGCGCCCAAGATCGGTACATCGACAGACGCT  
GGGCATGGCGGAAATAGCGTCTGAACGCGCAGCGCCCGAGCGCTACGCGAACGATA  
TCGAGCAGCAGGTCCTTATCCTGGAAGAGGATCGCAATTCGTATCCCGGCTGGCTAA  
TCTGCCCAGAAGCCCCAAAAATGGGAGCTTCAGAACCAGACCGTTGATCCATATCCA  
AATCCACGCAGCCTTGCTGCGATGGGGAGCAATGTGAGGGCCAGGCTCCTCTACGA  
GATCGCTTGGAGGCAGCGCGTTACGCTGCAAGCAACACCTATGTGGTTGATCAATGC  
ATTTCTAGAGATCTGCGATCCATCTCAGCCTTGTGCGCTAACAAAGAAGCAGCAGAT  
GGAAGTGGCGCTGCTTGTGTTTTGAAGAACACGCGATGGTGCGACGCTGAGGAAAATG  
AATATATCCCTGAGAGGATGATCGAAATACTTCATGACAACAAGAAGTACTGGGCC  
GAGAGTGACAACGAAGTTCATATCACCAGGCGCTTGTGGCGCGCGATAGTTTTTCAG  
TTCGAGGTTGCTAGAGAAGCTCGTTGAGACAATTGAGGAGTCTGATTCGGTCTGGAA  
GATCAGAAAGGCATCGCTCTTGACTGAGCTTGGATCGTATGAGCGCGGAGAGCGCC  
TCGTGGCGGAGGGCTACAAGCAGCTTCTCGGCCAGAGTCGAGCTGATTCGAGTTCA  
ATCTTTATCACCTCCAGGCTCGCGTATGCGGACTGGTTGTTGCGCGGAATTCGTGCTT  
TGAGGCCAGGTCGGTTGCAGAGCGCGTTTCCCGCGAAGTATGAAAGCACTAACTGC  
AGTCCGGTGAGCCATCTAGACACTTTGCAACGGGATCTTCTAAAGGAGATCGAGCG  
GCAGGAGGGTAGTAAGCGGATAGAACCTATGTTTCGAGCCCGGGAGATACAAAGACA  
AGTCCAAAGATCTGACCTTCAACAATACCTTGCATCCGCTTCTGCTGATGGATGCGA  
TATCGGCTATCGGTGGACTTCCGTTGCGCTGGCGGAACTACAGCTTCTTGCTGACT  
TGGCAGCGAGAATGGCGCAGCTTGATTCTGTGCAACGTTTCAGAAGCACGCACTC  
GCGATCCGGTCCGCAAGCCATGATCAGGCCGAGGTCTTGAAGACTACGTTCTCTAGG  
ACCGCAGTCGCACGCCTGCACCCAGACTATGCTCAGGGGCTTGTGAAGCAGTGTCGT  
GAGGCGATCGATTATTGGCGAGTGAGGCTGTCCAGCGATCAGACTCATCTTCGCGGC  
TATGCAATGGAACGAGTTCGAGTGTTCTGTGAAGTGCTCGCTCGGTTGTCGGTGAGG  
CTGTTGCCGCAGGAAGCGAAGCGGATCTTTCGTTTCGGGGTTGAGCAGGGCTCGAAT  
CCACAGTTTCGCCATGTTTGGCTGATCTCTTCGCTCAGGTCGCTCATAAGGAATGCG  
CTTGAAAGTGTGCCGAAGTCCGAGCAGACGGAGCTTCTGCTCGATGTCCTGAGCTTC  
CCACTGAGTCGAGAGATAGGGCTGGAGCCGAGCGAGCAGTGGCCGAATCCGGTTGT  
CGAGTGCCCCGGGCAGCGAATTGAGAATTCGCGATTGACCGCCGCATTGGCGAGA  
TCATCGATGCGATTGAGCCGTGCTCTCCAGGCAGCGCAGATCCGCTGCTCAGGCTTC  
TGCCACTCTTGGAAGCGAACTTCCTCAACGAGGGCGAGCGCGATCGAATTCATCGA  
TTGTCTGGCGCGGGGAGCCCGACGTGCTGCCTGAGCTCGGACTGCTCAAGTACGTCT  
GCTTGCTGCTGCCCGGGGGCGATTTCGGACCGGGTGAAATCCATGGTTCGGCAATACC  
TGTTCGAAGCGAGCGGAGATCAGCTCTTCAACAGCTCACGTCTAATGGACATCGCGA  
ACGCGGCGCGTGCGGAGAGCGTGGCGGAGCTGCCGTCAGAAGCTCAGGCAGATGAC  
TATTTCCAGAGACTTGTTGCGTGCGTAAGCCAGAGAGCGACGCTTTTGCAGGGTTCG  
CTGCTTGAGCGCGATAACAGTCAGCTGGGAGAGGATATCGGAAAAGCGCTTGCGCT  
ATCTGTGGTGCCAGCAATGGGCGCTGGTTCGCTGAGCGAAGAGAATTCAGTCTGCT  
TGAGTCCTTTCACTCTGAGGTTGGATCCAAGGAGGTCATCGCTGCGTTCTCCTGCTTC  
GCGGCGAAGGACCCCAGATTTCGAGTGAGGGTGGAAGCGCTTATCGGCAGGCAGAT

ACGGGAGAAGAACGGCAACGGCCCCGCATGTGCATCGCATGCGATCTTGTGCTGGC  
GAAAGGCGAGCAGCGGCCAGAAAGTCGAGCGATTGGTGTCCCGCCTCATCATGCAG  
CTGAGCGTGAACCAGTCCGCCTGCGCTGCAGCTCTGGTTTGGACAGGTCACGAACTC  
TACAAGGGCGGATACCTGATCGATCACGACGTTGCAGTGTGCTGGAAGCGGTGCC  
CGTCATTTTCGAGGCTTCTGAGTATCACAGCGTCAGTCCAACGAGTCGGGAGGCTGC  
GGTCGTTTCGCTCGTGAAGGCTGCTTGCGTCAGACTCGCCGCGGAAGCGGTTGCAAG  
GGGCAAGACCCTGATGGATGCCTGCGGAAAGTGCTAGATCAGGCGAAGCTGGACG  
CGCTACCTGAGGTTGCTTCGCCGATCGTAGCGGAGGGGGCTGAAGGCAGGTCGGC  
GCTCGCTGACGGGCTGCTTCACTGCCGACTAACGTCCACTTTTGGCCGAGAGCCGCC

>CONTIG\_102\_length\_4774\_cov\_13.386271

GGTTCGCGGCGGCGGTGCTTTGCCCAACGCCAGCTCCACCGCCTTCGCGTTGGCCA  
GGGCACCCAGCTCCTGCGATTTCTCATAGCTTGCAACCACGGGCTGCTCGCCCGACG  
TGCGGCGGCCATCCTGGGCGAGGTCAATGGCGGCTTCGCGCTGGAAGTTGCGACCG  
TTGAAATTCCACTCCACGTCCGCTTTGTCGGTCTGGTGGTAGATGGCGCGGTTGTCC  
AGCAAGTCGGCGCCTTTGTGCAACGCCTTGCTCATCAACAGCGCGTCGCCCACAACC  
AAGGCCGCGAGGCACGAAGCCGCTGCCGCCCAGCGCTGCTGCGGTGGACGCGCCACC  
GGCCCAACCGCCGACGTTGCGGGCCAAGGCATGGGTGACCTCGGATTGCGCGGCGG  
TGGCGTTGCCTTGCTCCAACAACGCCGACGCCGTGCGTGCGGTCATGACCGCATCTG  
CGCCAGTGGTCAGAAGCCCACCCGCACGGGTCAGCCCCCGAGCAGATGCCTCTCCC  
ATCAACAACCTCCATGGCGGCTTCGCCACGTTGGCCACGAGGCACGCGCAGGTTATGT  
GCGGCTTCCTCACCGAGAACCTGCTCGACCTTGAGGATGCCCTGCTCAGACAAGACC  
ACGCGCCCATCGTGGTGAGCATTTGCGATGGCGAGCGACAATCCGCTGCGCTGAAG  
CTCGATGTCCCCGCCTCGAATGATGGCGGTGTTACTGACCTGTATCTGGCTGAGCGT  
GGTGACGATGCGCGACTCGGAATGCGCAACAGCTCCCCATCCGTGGTCCACCCCCGT  
GAAGCCCTTCAAAGCCTCGATTTGCTGGGCGTGGGCTTGGTAGTAAGCAGGGATATC  
ACGAAAGAAGTGGCGAACTCTCTGGTTGGTTTTCGCGCCGGAACCTCACCTAATGGCGT  
GTTGGTGTTTAAGTCATTGTTGATCAATCCGACCTTGACTGTATCGCGCAGCTGCTCC  
ACGCGCTTAGCAACCCGATCCATCGCCGCCGTGTGCGCTTCCAGAGCTGCCTGACCG  
TCCCGCGTCAATTGAATGCGATTCAACCGTTCAAGCATGCCCCCTTGGTATTCCGCTA  
AAGGGCCGCCACTGTGCGGCGTCACCCCAAGCGCGTCAGCCAGTTGAGGACTAGCC  
GGCAGGAACAAACGGTTCTCAGGCGCATGAATATGAAACTTCCCGACCCCTTGCAA  
CCTTGCCAACAACCTCGCTGTTCTTCAGCGTCTGCTGTTTCGATGTTGTGATGGTCTTGG  
AAAAGTGTCCGATAGTTCGCCATAGATCAGGCTCCTTCCTTGCTGCCCCGTGTTTCGCA  
AATCAGCAGTTCACGACGTCATAAAACCAAAGCCCATTTGGATTTTCTAGGCGTGACA  
ATGCCCGCCGCCTCAACGGCCTCCTTGAACGCTCTATCGCAGAAGACGCCGCCATGG  
AAAGACAACCTAAAAACATGTGCAGAACCCAGCACATCTCGCCGGAAGGCCAGCCG  
GATATCGCCTGTGAGGTCGTAGTATTTTCCCGCTTCGAAGTCGTCACCTGACCTCGAT  
GTTGAGCGCAGAGGCCTCTTCGTCCAAGGCATCCAATGTGCGGACGACATCGCAGA  
GGAAGACGGTCGGACCTTTGGAACCATCGGCCAAGCGATAGTCAGCGTCAGCGAAG

ACGAAGGCATCCGCATCCACTGACTCCATCACACGGCGCAGCCGTTTCGGAAACCAA  
CCAATAGCCGCTGAAGCCTCCCTCTAGGTCTTCAGGCAATACACCCTCACTCGGGTG  
GTAAACGAGGCGCGGGGTTTCGCGCAATGGTGGAACCCGCCCTCCTTTGGCTTCAC  
GATGAGGCGCGGAGGTGTCCGCAGAACCTTCTCGTTTTCAAATACAACCCCATGCCC  
TTTTCTCCACGCCGAGCGTCCGGCTGCAGTTGGAAGAATTCACTTTTTTGGGCTCA  
TTGCTCATCGTCGTATCCCCGCGTTGCGCCCAGTCCTTCAAACCTCTTCTACGGCAACA  
AAATTACTCACAAGCCAACCAAATGTGTCACTGAGGGCGTCGGCAATACCGTCTTCG  
CTCTCGCATTCGACCGTGGCTTCAGCGGGCAAGACAGGACGCTTGCCGTCGGTCTCC  
TACACAATCCCGCGCACGTGAAACGCCTTCATTCTGCTCCATGGATGTGGATCTGC  
CTTCGCAGTCTAGCGTCGGCAGACTGCATAGGTGAAGGGGCGGCTATACCCACCCCT  
GGCAGCCAGACTGGTGTGCTGCTGGCCGCCGATGGCCAGGTGGTCCAGCACTCGGA  
TGTCCAGGAGGCCCAAGGACTGCTGTAGGCGATAGGTGACCTTGCGGTCTGCCTCGC  
TGGGCTCGGGATTTCTGCCTGGGTGATTGTGGAAGGATGAGCGCGACCGCGTTG  
AGCTCCAGCGCGCGCTTGCGGACGACTCGACTATGCGGGGCGAGCAAGCAGCAACG  
TGTGAGCTATGAATCAGGCGGCGTTGTCCCTGGCTTACACCACGAGTCGGGATCAGC  
TGATCAAGGAGAGGACGGCGTGGCACCGAAGCTCGGGCATCCGTCCTGCCGCATTG  
CCTTGGCATAGAACGCAGGAATATCCAAAGAGGCCACGCCATCCTTCACCGCCAGC  
CGAAGGGGTATGGCTTCCCAAAGCTCACGATGGACTCGGAAAACGCGTCCAGATG  
CTCCTCGGTCACGCACATGCTCGTGTAAATCCACATACCGCCAAGGGTTCTCCCCTGA  
CTCCAACGCAGGGACAAAACCGGGGAAGCGCTGCTTCAAGGCTTCGAAGGCCGGGC  
CTTCGCCATGCTTGAACACGTTACGACCAGTCGCAAGGCTTCAAGATCCTGATAGC  
GCGGCACTGACGGCACATCCCACCCGAAGGCGACCAACAGCGCCTCCAGGTGACCC  
CATTCGCACCGCCAAATCTGATCCCGAGTCTTCTCTCCAATGACCCACCCGGCTTGG  
CGCAGCTCGCGAGCAACCCGGACACGGAAGCTCTTTTCAAAGTGGTGATACATGCC  
GGCGGCGATGCCTAAGAGAGTGC GTTCCCTGCATCTCATGGAGAAGGTTCGTAGTGTT  
GAGGCTCTGATGAAACGCCGCCTCGTAAACCATCGACATGTCCCATTGCTCGGGGTC  
GAAGCACTCTGGAGGGTTCTCCAAGCAGTCCTGCTCCATGGCTTCCGCCTCTGCGTC  
GATCGCAGCAAACGGCGTCAGGAGACGAGCCTTGGCCTGAGTTAGGTAGAAGCGCT  
GCTCCTTGACTCGCAGAGCGATCTTCTGCCATGAAACAAAAGACGCCACTGCGCC  
TGCGCGTGACCAGGACCTGCATTGTGCGCTCCATTTTCCATTGAAGGCTTAGGGCGT  
AGAACGTGAGGTGTAAGGTTGGAACCTCGGTGCCAACAAGGACAAATGCCTCCGCCT  
TGGATGACTCAAGCACTTCAGGCTCATTGGCCTGGATATCCTCCAAGAACTGGCTGA  
AGATCTTGCCGCCCTTCTTCATGGTCATCTCATCCCCACGACGGCCATCTTTGCCCTG  
CACTGCCATGATGAGGGATTGGGCACCGGCCAGCTCTTTCAGCACGTCACCAGACA  
GTGGAACCAAGATCGTCCAAGACCAAGTGCAAAGGCGTCCGGAACAGTTGACCTGC  
GGACGAGTGTTGTTGACGGCACGCACACGAAGGGTGCGGCGGTTCATCGAGGCGGAA  
GAGCACGGCGTCGACGTCAATAGGGTCGCCAAAGACCTGCATCATTCGCTGCAAGC  
CCATTTGCCCCGTCGCCTGTGATGATCTGGTTCCCTACGCCCCGCTAGGCCAATCGTCCC  
CGTGCCGTAAACGCAAGCGTTCTTGCCCGTGAAAGTGTCGGCCTCGCACTTAGGCTT  
GGCCATCAAAGGCATGGCGGCGCAGAAAAATCCCATCAGCAGGCTGCATCGGAGGA

CCGCAATCACTATGCCGTTTCATTCATCCCCCGTCTGATTGCGATTTCGATCCGGCGCCCC  
TTCTTAAGCGCAGATCTGGCTTGGTAGGTATCCACAACGAACCAAACGTAGGCAAG  
CGCCGCATTGACCGCTAAACGGGCATGCCTAGGCTGTAGACCGCGATGATTGCCGC  
GTGGGCCGTGCCCCGTGCCATACCTGCCGCGCAACTCGGCCAAGTGATTGGTCATTG  
CCGCCAGGTTCTCAAGATAAGCCTGATGTTGTCGGCACCTTTTTCGCGGATCACTCA  
CGTCGTCGGGGACCAGTTCAAGTTCCTTCGCCACTCGCTTGGTCAGGTCATTGATGT  
CGCTGGATTTCCCGACCTCGACGCCAAGGCGGCCTAAGATCGTCTTGCAGCAGGACT  
CAACGAAATCCTTGGCCGTTCCAATGGCGACCTCCGGATCGGGCGTAATGGCATTCT  
GCATGCGCTCGATCTGCCGAGCCATGGCCCCAGCCTCCAAAAATTCGGCAACTGCCT  
TCGCCTGCTCTATCGCCTCGCGACCACCGTGGTTGAGTTGCTGCGGGATGTATCGCG  
GCCTGCCGGCGATTCTGCTCTTCTTCCACCAACTCCCAACCCGCGCGACGCAACTGAT  
CGTTGAAGTGCTGGACAATCTTTTCAGTCTCAGCGCGATCAGGACGGACCAGCGGGT  
GAACAATCTCGCACAGGAAGCGGAGAAATGTATCCGCCGGACCGTCCAACAGCGCA  
AACCGATCGTCATCAAACACCCAATACTGATCCCAGTCATCGTTGTTGATGCGATGC  
TGGTAGATGTGCGCTGCGGCGTCCTTGAATCGGCTGTCTGTGGATGGAAGCCGGCGC  
AGCTCAA

>CONTIG\_103\_length\_4749\_cov\_13.521852

CCATCGACGATCTTCCAGGCTCCGGCACCCCTTCAACATCGCCTGGTGGCCGCCTTCG  
AGGCAGCCCTCTCGCAACTAAGCACAAGGCACGAGCAGTTTGATGTGGTCCTAGTC  
CATCTCCCAGAGGCTTGGCTTCCTTATACGTCAGGAGACGGATTCGACGCGCACGAT  
GTCCTGAAGGCGTTGGGAGCAAAGCACGGTATTCCGACCCAGGTGGTCAACGACCG  
AACCTTCAGCTTCTCAAACAAGGCGCAGTTGGCTTGGAGGCTGTCAATCGCGCTCTA  
TGTCAAAGCCGGTGGCATTTCCTTGAAGCTCGCCCCCTCTGGCGGGAGTCCCCGCGGA  
TACGGCCTACATCGGTTTGGCATAACGCGCTGAGGAGGGTCAACGACGAAACCCACT  
TTGTCACCTGCTGCTCGCAGGTGTTTCGACATGGATGGCGGGCGGCATGCAGTTTCGTGG  
CGTTCGAGGCCAAGGATCCGGTCCAGGACGTGCGCGAAGCACGACGAAATCCCTTC  
TTGTCACGAGAAGACATGCGAGCGGTCATCGCCCGCAGTCTGTTCGATCTACCAACA  
GCGCAATGGAGGCATTCTTCCTCGACGAATGGTCATCCATAAGAGCAATGCGTTCAG  
GGAAGACGAAGTCCTAGGTGCTCGTGATGCGCTGACAGCCGTCCCCGAGGTGGAAT  
GCATTGAGATCAGCTCCAGACCGACTTGGCGGGGTGTATGGCTGGTCAAATCCTCTG  
GCGGCACCGCGCCCCACCCAGCCTGCAAGATACCCGGTGCCGCGAGGCACGTTTGTC  
CCCCGGTCGGGCACGTCCGCTCTTCTTTGGGCCGCTGGCAATGTTCCAGACGTCTCA  
AGCAAGTCCGACTACTATCAGGGCGGGAAGAGCATTCCCAGACCACTCCTGCTGAC  
CCGTCATGCGGGGACCGGGCCGCTAGAAACGATCGCTCACGAAACGCTGGCGCTGA  
CCAAGATGGACTGGAACAACGATGCGCTCTACGACCCAGTGCCCGTCAGCATCCGC  
TACTCCCAGAAGCTCGCCAGGACCATCTCCAACGTTTCAGGACCTTCCTGGAAACAGC  
TACCCCTACCGACTGTTTCATGTAATCCCAACTCGCAACAATAGAAAAGGAGCTCAAC  
GTCATGATCGGCAAGAAGCAGGAAGCCTTCATCGAAAAGCAGTCTGGGGAAAGTGAA  
AGGCCCATACCAAGCCACCTTTGCAGGAACCACCGTCATCTTGAATGACCCGACCGC

AGACGTGGATATTGGCGACCATGTGACTCGAACGCTCCCAAACGGGAAAACCTGAGC  
GCTCCTACATCGCGGGCGTTGAGTTCTACGAGGGAAGCATTGGACGCTTTGGACCAC  
ACTACCAGTTGAAGATTGGTGCTGCCCCTGTGAATCAACAACGAGCGCACACCATC  
AACATTCAAGGCTCGCACTCGATCCAGATTGGCGACCACAACACCCAGAACGTCGT  
CGGTGCGATCCAGGCGTTGCATCAAGCTATCGATGCCTCGAATGCGACGGAGGACC  
AGAAAGTCGAGGTCAAGTCGCGCCTAGCAAAGCTCCTCGAACACCCCATCCTGGCA  
AGCGTATTGGGCGGGGTTGCAGGAGCCGCAGTCAGCTGAAAATCCGGATTGGCGGT  
CGAGCAGCAGCAGACCATCTAAGCATCCTGCTAGATCTGCCGCGAATGCACACGAC  
GTCGTGCGTGGCCCGAGGCAACACGTCAAAGGTATTAGCCAACGCTGATCGACCGG  
GCCATTCCCAAAGAAGGGCACAACCTAGCTCGATCCCGTCCCCCGTCAGGCGATCTCT  
TGGATAGCTGGATTCTTGGCCAGGAACCTCACGCCATCCATCATCGGCAGCCAACGA  
GCTGAACGGCTCAGTCGAAGTAACCTTCAGCCCGATCGAGTCCTTGTGATGGTGCCA  
GAGCGCAAAGACACGTCCGGGCTGATTTCCGGTGAAACGATGACCAAGTCAGGCCAT  
GCACGACGTTCCCGAACCCTGAAAGAGCTCAAGACTCACGGCTTGAAACGGCGCG  
TAACCATTGTAGGGAACGTCGTCACCCTCAAGACCAAGCAGCTTGCGATTCCGTCCG  
TCAATGGGGATGAAAAGGGCAGGCTTCCCGGAACGATACCGAGCAACCTTGTATTC  
ATTAGCCTTGCCTCGCAGCCACCGATAGGCTCCCTTGGCATCCTCAGAGAGGATATG  
GCATTCGACCGCTACGGTAGCAATGCTCTGACCCAGGTAGAGCACCGAGAACTCGC  
TCTTATGGCCTACCGGTGGATCAACCCGCGCGTTACGGAATACTTCTTCTGGCGGAT  
GGATATGTGCGCCGTCATAGCGAAACAGGCGAACAAGATCTTTCTGCGGGTCCAGC  
AAGAGGACCTCCAGATCACTGGCGTCGAACACGCGATCCCTCGCTCAGTATTGAGA  
AAAGACGCCCCGCGGCAGCAACTACAGCCGCGCGCCTTACACTGCCATCCTGCTCCA  
GAAACCGTTGCGCGACCCCAACGTACGGGCGCTAGTTAGCTACCAAGAAGCGCT  
TCAACAGGCGTCAACCCGCCAAGCAAATCGTTGATGCCTGTGAAGAATGCAAAAGC  
CGCCGCCCCCTTATCAGGCAAGTGCGAGAGAATGTCTTCCAGAGGCTCGCCAGCGA  
TACCCTTCCAAGTCTGAAATACCGGGTAGGCCCTGCCTCTCTTGCGATGAGGGCCGA  
GGAACGAGATGACCTTCCCTTCACTCTCTCTCCGCCGCACGGTTTCGCTACTACCCC  
CAGCAACTTTGAGAATTCAGCCACGCCGAGCGTCTCACTAGGATCACGATCATCTAG  
CCGATAGCCGTCGGGCCATGAGTGATCTGCTTGCGACAGCATTGCTATCCGGGTCCG  
CTGGAGTTCCGACTGCAGCAAGCTACCAACTGTCACCGTTTCCAGCCACGAGCGCAT  
GATCTTGACAGTTTCCGCCCCACGCCAGCTCGAACCAGTGCGTCAGCGTGGCTGTC  
TTCGCTGTTTTTAATAGCCAAAGCCAATGCATTTGCTCGAGCCCTGCCGCGCACAAG  
CATCGGCGGGCGGGACGAACCCGCTCAATGGGTATGTGAAGGCATCGGAAGGCGAAA  
TGTGCGCGATCAGGGAGCCGTCGTATGTCTCCAGTAGCTCACTAAGATCGTTGTAAA  
GTCCGGGCGCACCCGGCCGGTGATGCTCTAACGCATGCGCCGCCACACCTTCCAATC  
GGTCAAGCTCGTCTAGGCCTTTCAGCGGCATTACCAAGTCATAACCGTAGTTCCGCA  
CCGCTAGGTGCTGCGCTTTCGCCTTTCGATCTTTTGTCTGCGACATAACGGCCCCGGA  
CGATGCTCACTGGCCGCAGTGTGGCTTATGGGGCTTATTTTCGTCAATAGCGATTACC  
ACGAAATCCAACCTCAACACAATACTTCGACAAGGGCTCGCGAAGCCAGGTCTCCGA  
GGATCGTCGGGTTC AAGGGCCAGGCCATTCCAAGGCATTGCGCAAGAAAGCCCCTG

CTTCTGCGATCAGTGTCCGTCTTTTCGACATTGTGACTGAATGCAAAGTAGATCAAT  
CGAGAGGCGATCGTGGCATTACGCTCGTCAGTATTCATTATTGTGAATACGCGCAC  
ATCGCATCCTCTCGCCGTTAGGGAAATAGCTGCTTGGATGGAGATCTCTTTCACTAC  
GCCAAGGAGCGTTATGCCATCCCCTCAACTTCGAATCGCGTCCAGGCTTCTGGGGCA  
TCTGCTTTGGCAAGCACCGACGAGAGAACTCCCTGAGCGCATGGAGGATGTCCAGC  
ACGCGTGGGATGTCGCCGGCGCGCTACTTCAACTGTCACGGGAAATTGAGCCATCG  
GTCGATGACGAGACAAGTGGCCCCACCGCGCCCCGCCCTTCGCCCCAGTCTGGCCCCCT  
CGGCGCAGCATTGCGGTGCGGGCGCTCCGTGTGTCGACCGCAGCGCTTTGCACGTCTTG  
CAAAGCTCTGCGGAGCAATGGCGTGCCAGTCGAACGATGAAGAAGCCGACGCCGAC  
GGAAGCGGACCAACGAATGGGGCCTACCTTCCATTGACTCGACCGGCCAGCTTAC  
GGGTAAAGGAAAGCCCAGCAGAAGCGGGGCTTCTTGCGGTTCTACCGGCCCAAGCG  
CGGCCGCCGCGTTGGAGCGGCCTGCTCAAACGCGAGCGGATCAGGCGGCGAATCTA  
TCCCACCAAGGACGCCGCACGCGCTGCGGTATTCGACTACATCGAGATGTTCTACAA  
CCCCAAACGCCGTCATGGTTCAACCGGCTATCTGTCCCCTGTAGAGTTTGAGCGGCG  
TTACGCGCAACGAGGGTCTTGAGTGTCTACGGAACCCTGGGCGTATCACTTCTGCA  
GGCGCTGGGTGACCTTGCGGTCCGCTTCGCTCGGCTCTGGATTGCCGCTCGGATGGT  
TGTGAAACAAGATGAGGGCGACGGCGTTGAGCTCCAGAGCGCGCTGAGCAACGACT  
CGCGGGTGAACCTTCGCAGCCATCGATGGTGCCGGTGAAGAGGTGCTCGGTAGCCAG  
GATGTGGTGCTTGGTGTGAGGAAGACGACGCCGAAAATTTCTGACTCAGATGTG  
CGCAGCGGGCCACCAGGTAGTTGCCGGCTTGGTCGGGGCTGTGAATTCGGCCTTGGC  
GCTGAAGGCGTTGTTCGAGGATGGTGGCTGCTGCGAGGAGAATCCCTTCCTCGTCCA  
TTTTGAGTTGATACTGGACTGCTCGGTCTTGGGTGCGCTTCATCGGTTTGTCTCCACC

>CONTIG\_104\_length\_4712\_cov\_12.895093

GATCTCCCGGCGAGTCTGCTTGCGCTTGCCCAGGCCCTCAGCGTCACCGAACGTCAG  
TTGCATGGATCACTCCTCAACATGGGGGTAGTGTGCTTATCTGCGGTGCGTTGTTC  
AGAGGTTCCTTAGGTCGATTAACTAAGCGGCGGTTTATCTCAAGCTTCTTACGCTTG  
CATCAAAGAGGAAACAGCGAAAGGGCGGTTTAGGCCGCCCTCATCATTTATTTTCTT  
TCCCATCCCTTGCGCAACTTCATTTGTTTGTATGGGTGTATCTACCTACACAAAAAA  
GGAGGATTCATGCGCATTGTTACTGTTTCGGCTGTCGCCGGCTCTCTGCTCGCTCTGG  
CTGGCTGCTCGTCTGAAAAGATGGCAGGTTTCGCCCCCATCTGAAGACCCACAGGTTG  
GCTATGTGGTCCTGTCTGTTGAACCGGTAGAGAACACCACTGAAAGCGTGCGCTCGC  
ACCAGGCCGTCGGGGTTGAGGGCGTCTGGCCGCCAGGATTTGATGGCGGGTTGGTC  
CTCTACCGCCTGATTGGACCGAAGGATGTCAAACGGGCGATTGTCCAGCCAGCCTTT  
GCCAATGGGCGGCAAGCGCTCCAACCCAATGACGGTGTCTTCGTCCATGGAACCTGG  
CCCCTTTGCATCCGTCGTCACCGCACCCATTGGGGCCGACCCAGCGCCCTTCATCCG  
CACGGATCGGCCATCAGGCCCAGGGGCACTGGTGAAGGTGATGCGTGCAGAGGAAG  
CCGGTGACAAAATACAGGTGCGCTACCTGGATATTGATGGCGCCCCGCGTGAAGGAG  
CTCGTTGTGAGCAAGTCCGGTCAACTGACCGTGGACTACTTTCGCTCCACATCCTTC  
GCCTGCGTATACGGCTCTGGAGCGTCGGCCAAGATCTATCCCCACTGGTCCAATCAG

TTGAAGTGTGGCTGAAGGAGAGAGGCGGCGAAAGCCGCCTTTCCCTTGTCTGAGCC  
CCTTGCGCAACTCCAACCTTTTGTATGGGTATATCAACCCACACGAAAAAGGAGCA  
TCCATGCGCGCACTCATCCTTTCCCTGGCCCTCGCCAGCCTGCTCCCACTAACGGCCT  
CCGCCGTGACAAACAGCTCTGCCCCGACGCTACCGCACCAGCGAAACCCTGTCCGTCC  
AGAACGCCCCGGCTGGGTGAAGTCTTGATGGTCCGCTCGGTGGACATCAAGAGCGAC  
AAACGCCTGAACGCTGGAAGCGCCATAGGTGCTGCCGTTCGGCTACGGTGCCTGATG  
TCCACTGCCCCGGGTGCACGCCAATGATGAGCGCGCTTCTGCTGGTGTGCTGCTGG  
TGTTGCTGCTCACGGTGCCGTTCTGGACCCTTAACCGCTTCGCGGAAGCAAAGGCCG  
CATGGATCCGCGTCCGCGCTGGAGAGCGACACGGCCGAACCTACGGCCGCTTCGTT  
ATCCAAGCCGCCTTGTCTGGGGTGGGGGTACCTTCCTAGGCATAGTCGCGGGCGGTG  
GGCACCCTCGGTGCCTGGCCGGTAGGCCTCTTCCTGCTTGTGGTCGGCTTGGGTGCA  
TGCAATTGTCGCGCGCGGAGCGAGGCAATGAGCCGCGTGCGCTCCACCTGTTTTGCGC  
CAGGCGCGCTGTCGAATAGCGGCGGCTTTGAGTTGCTGCCCATGCCTCAAGACGTCC  
AGGCCATCTACGACGCTGCACAGCGAAACACTCCCTACGGCACCGAGCTGGACGAC  
GCCCTGGCGGGCCACCGGCAGGCGCACGGCGAGCCGGAGCAAATCCAGCACGCCCCA  
GCGGGTGGACCCCTGTGACGCCGTGCCCAGCAGCCCGGCAGAGCGCTACAAGGCTT  
ACGTGAGCCAGCGCCGCTACGCGGTTTCGGGCCTACTTTGGAGCAGGCAAGCACCCC  
GAAGACATGGCCCGAGTGCTGGGGGTGCCGGTTCACACGATCCGCAAAGACTTGGC  
AACCATGCACCTGCGCCACCAGCGGCTCCTGTGCGCCGACCCTCGCAGGGTGCACGCC  
TGCCGAAATCCAGGGCCTGCTTACCCAGGGGCTCACACAAGGCAAGTTGGCTAAGC  
GGCTCAGGGTGTCCCAACAAGCAGTCAGCCAGTTCTGCATGGCGAACGGCCTTACC  
AACCCTGCCCCAAGCACAAACGCCAAAAAAAGATATCCGAGCGGCAGGAAATGGTGC  
GCCTCTTAAGCGCCGAAGGCCTTTCAATCGGCGAGATGGCAGAGCGCGTGGGCGTT  
CCGACGCATGTGGTGTACGTGTCCGCGTGAACCTTAAACTGCCGCGCCGCAAGAC  
GCCGATTGACGAGTTCACCTCTGCTCGGCTTGAGCCGCGCAGAGGTTCAACGACTGTT  
GATGCAGTTTGAAGCCGTTGGAGCGCTAGCACGGCACTTGAACACCAGCTCCCCCT  
GGTCTCCAAATACCTGAAGCGAGTGGAGCTCAAGGCACCCCGCGATGACCGGGGAA  
AACACCGGTTGAAGCGATGACCTGGATCTTTTCCCATGAACCCACGTAACCGCGGCC  
TGGGTGGTCACTCCCCGCAGCACGTCCAAGCCCTATTGAACCAGGGCCTCACTCAGC  
GCGCCCTGGCCGAACGGGTGGGCGTCACGCACCAAGCCGTGAGCCGCTTCGTGTGC  
CGGCATGGTCTCCTTTCTGGGGGGCTGCAGGCCTACCGATCACGGCAAGCTGACCAA  
GTGGCTCAACGCCGTCGGCAGGTGCGACAGCTGCTGAAAGAGGGGGCGCACGTGCGC  
GGAGGTGGCGGGCCCGGTTGGGGGTGTCCATCGCCATGGTCAGTCTCGACCGTCAGG  
CGTTGGGCTTGGGCGGTGCCCAATCCGATCCAAGCAACGCACCTTGTGTGGATTGA  
CTCGGGAGCAGGTTACAGGCCCGTTTAAAGGCCGTCAGTAGAGCCCAGTTGGCCCGG  
GAGCTCGGTGTCAGCAGCTCAGCGGTCTACCGCTTTTGCAAGAAGACGGGCCTCATC  
TCCTCCTAGTGGGAGGGGAGGGCATCCGCGCGGTCCAGTCGTCCAGTAGCCATGTCC  
ATGGAGCCCGATTTAGCTCTGCTCTCCCTAAGGCTCGTCCGATCAGGCACTTACGGG  
CGGAGATGGTCGGAAGCGTTGGCCAGACGCGCGGCTGAACGATACTTGGGGCCTG  
TTCGAGGGGATGTATTAGATGCCGCTGCTCAACTGGTCTGACCGTGATGAAGACCTG

ACCCGTTCCGCCCTGACGCCCTACCGACTCTTGGAGCCGGTGGCCAGCTTGTCTAT  
GGGGAGGTGGACTCGCCCAACATGCTGATCGAGGGCGACAACCTGGGTGCTTTGAA  
GGCGCTGTTGCCGTATTACGCCGGCCAAGTGAAGTGCATCTTCATTGACCCGCCTTA  
CAACACCAAAAAGTGCGTTCGGGCAATACGACGACAACCTCGAACACTCGCAATGGT  
TGTCAATGATGTATGCGCGGATTGAACTGCTGCGTGATTTGCTGGCATCAAGTGGCT  
CGCTATGGGTCTCGCTTGATGACAATGAAGCACACTATTTCAAGGTGATGTGCGATG  
AAATCATGGGGCGCCGCAACTTTATCGCGGACATAGCCTGGAAGAAGCGCGATGGC  
GCGCCCAATGATCGAAAGATCGGTTCTACCTACGACCATGTGCTGGTCTACTCGAAA  
TCTTCATCCCTGGGAGCAAAAAAGACCAAGGCCGAAGAGTCGTTCAACTTGATGGA  
TCGGACTGAAAAGGCGGACTCGCAGTATCGACTTTATGAAGAGCCTTTTGGGTTCGA  
CGAGCGAGGTCCCTTCCGTAAGGTTGATTCCACCGGGAATGCCAAGGGGGGGCGCT  
TCGTGGAAAGCTTGGTCTATCCGGTAAAAAATCCCTTCACCGGAGAACTGGTTTATC  
CAAGAAAAGGGCGTTGCTGGGTATACAAACGTGAAGTGATGGAGCAGATGGTCGTG  
GAGCGACGCTTTTTCTGGGGGAAGGATGGGAGAGCTGGAACCTCCGATGAGGAAGCT  
CTTTAAAACAGAGGCGAAAACGGGCATGACGGCTCCCACAATATGGGATGACGTTG  
GCCTCAATCAGCACGCCGCGCGTGAGTTGGAGGTTCTTTTTGGGGAGAAGGCGGTGT  
TTGACACGCCGAAGCCGGAAGGGCTCATGAAGCGCGTCATCGAGATTGCGACTAAT  
CCCGGCGAAATCGTCATGGATTCCCTTTCTCGGTTCCGGGACAACGGCGGCGGTGGCT  
CACAAAATGCGGCGTCGCTGGATTGGAGTTGAGATGGGCGAGCAAGTGAGGGAGCT  
GTGCCGCCAGCGTCTGGTCCGAGTGGTTGACGGCGAGCAAGGCGGCGTGTCCGAGG  
CAGTCGCGTGGGAAGGTGGGGGTGGCTTCCGCTTCTACAAGCTTGGCGTCCCCGTGT  
TCGATGACGGGGGTACATCCGCGAAGGCATCAAGTTCGAGCACTTGGCTGCCAC  
GTCTGGTTTTGCCGAAACGGGCACGGCACGCTCAACCCGTGCTCCTAAGCAGCCGTTT  
CTGGGCGAGCACACGGAATCGGCTACTACCTGCTGTTCAACGGGATCTTGGGCGAT  
GAAAGCAAGACCGGCGGCAACGTGCTGACCAAGCGAGGGTTGAAGGGCCTGCAAC  
CCTTTGATGGTCCAAAGGTGATCTACGGCGAGTCGTGCGATTCCGCCAAGGAGCGGC  
TGGAGGAGCTCCAAATTACCTTCAAGCAGATCCCCTACGACATCAAGGCACGCTAA  
GCATGGCTCTTTCTCTCA

>CONTIG\_105\_length\_4684\_cov\_23.475093

GCGCTGGGTTCGGTTTGC GACTCACAAGCAGGCCTCGGAAATCGGGCAAACAACTTA  
CCTGCGCGCCTTAGCACACACCTACCCGCAACGATTCACCACGACATTAGGCAAAC  
ACAGCTGGGACAAAGGCGGAACCCCTTCTGGCGGAGTTTGTTAGCGGCCAGCCGTAT  
GATCGGACACGCCGGGTCCGGGTCTGGAAGCTCGAAGAGAAACAGACCGATGTGAA  
CCTGGCGCTGGCCATGTACCGCGATGCTGCGTCGGCGCGCTATCAGCAGCTGGTTGT  
GTGCTCCAACGATAGCGATATCGCGCCGGCCCTTGCGGCGATCCGCGAGGACTTCCC  
GACCATCGTGCTAGGCATGGTCACGCCACGTAGGCCGCCGGTCGATGGTGAAGCGG  
ACAGAAGAGTCAGCGTCTCGCTGTCGAGATGCGCTGACTGGATACTACTACATAT  
TGGATGATGAGCTGGCCGCAGCGCAGCTTCCCGAGCGCGTTTCGAAACCTGGCAGG  
TCAATCGATAAGCCTGGGCACTGGTGAGTCCCCTCACCAGTGATTACCCGCTTTTT

GGCATTATCTGTAGCTAACTAGGCGGCAAGGATACGGCGAAGCATTTTTTCTGCCTC  
TGCATCATCTCCACAGCGATAGACCTCTTTAGCCATCTGACGCATCGAAACGCCAGG  
GGCAACCTCGGCATCTCCATCGGCCAGATCAACCCCGGAGAGATCTTGATCCGAGG  
GGAGACCGTTAGGAAATTCCACAATGACCCACACATCCACAGCACGGAATACAGCG  
CCGGATCGCGTCTCAATTCGGTCAAATAGCTCGGTCATTTTTTGCGCCCCAGCGCCA  
TACATCAGGGCAGCGTTTAGGGCAGGACTTAGACGCACCCCGAGCAAGGGATCGCG  
GTTGTGAAACGTAATATCGCAGTAGCTCTCATGGCGCGATAGATCCACTAGGACGCG  
CATGTTGTGTTGCAGTGGCGTGATCTGTTCTCTTGCAATTATCTGTTCTCCGATATCG  
GGCCTGCCGACCCTCATGTTACGTAAAGTCAATGAAAATCCAGTCGATTTAAACAGAT  
ACCCGGAACGCCATATCGGCGGTTCGGAATACGGTCGTAAGTGTGCGGACTTGCTGCC  
GAAAAGAACGCGCTCGCGCTCGACGGTATGCACTTTGAATACCTCGGCACGCTCCA  
CGATGCGCCCTGCCGAGTCGAGGCTGTGCGCGTAGTACCCTTGGCGTTCGCGGCTGA  
CCAACTCCATGCGTGTTGCGCGGCTGCCGGTGTCCAGTTTTCGGCGACCGATGGCC  
AGCGCTGGGAGAACCCGCCAAGGCTGGGTGACATGCCATACCACAGCACCATTGCC  
TCGGTGATGGCGTCCAGCTCGTCATCGAGGACGACATACTGCACCTGATGATTGACG  
ACGCGATCACCGCCGACAGCCCAACGCGTCAGCGTGGTGAAGTCGCCGACGCGCCCC  
GGCCGTCTCGATCAAGATGCCCTGCATGGCTTTCTGGCCGACCTTGCGGCACGCCAC  
CCGATAGCACTTGTTGGGGTACGGTTTTCTGGCGACCAGCTCGATGCCGTTGCGCAG  
CTTCAAGCCGAGGTCAGGGCAATGGAAGTCGATCAAGTCGCACTGCGGGGCGTCGG  
GTTCTGCCACATACAGGCGCGGGATGATGTGTAAAAGCATCGTGGCGGTTCTTCCA  
TTAGGGATGACCAAGCCGGCGGCGTTGATGACTAAATTCTCAGCCACCACAAGCCC  
ATGAAAAGGGTAAGCAGCACCATTACGATGATTGCGACTCTCTTGCGGTACTCGAAC  
GGCGTCAGTAGGCCAAGCGTGACAGCGTGTGCGGATAGGATGAGGTTGACCACGGC  
AACGGTAAGACTCGCGGCCGTGAGGAACACCAAAACGGAATATAGATTCATGTCGG  
CTCCTGTTTGTGATGTGCGCTGTTTAGCTGGCTCTCGTCTCAATGCCTGAGAGGAT  
GGCCAAGTACGTTTCGTGGATGCCGGAGCGGCAATGTCTTTCATGTTGAAATTTCCGC  
GAGTCGAGAGCGACGGAGACGGTGGCAACCGGGATCACACAGGTACAGCCGTTGT  
GATCGATAGGGCTTGCCGGATAAGTAAGCGACGCGGCTAGAGTCCACCCAGCGTCA  
GTGCCGAACCAGCAATAGACGCCATAGTGGACTGAGAAAAAGACAGGATAATATT  
GACCCATGCAACCGGTACGAGGTGCTTTCAATGTCACAGTAATCGTCAAATACGAC  
CTTACGGTTGAGCGGGATAATAGCTGCCGATTCGTTCAACACGTACTCGCGCGTAGC  
ATTTTTTGGCAGTTGTGGGCCATCACAAGGGGCGTGCGGACGTGGAGTGCGGTAGC  
GCTGCCATTCGGGCAGCGGCATCGTCTGTACATGCGCCAGCACAGCAGCAAAGAAC  
GGATCGAACGTATCCACGTAATTTTGATAGTGGCTGCTTGGCATGTGCTCGTCGTGC  
ATGTCGTGGCTCCTCGGCTTATTGCTGTGAATAGACGGGGCCGCAGCCCCGTCCAGT  
GCCAGTCTTAGTTTTCGATGTGCTACTCGGCAGCCTCACGGGTGCGATACAGGTAAA  
AATCGTCCCTCTCCCGGCCGTTCTTATAGGTCTTCCGGATGATCCACCAATCCGGCTC  
AGTGCCGGCAGGGGTGTCACGGACGGCAGGCTCATCGTCCAGGTCCAAAACTCTG  
TCACACCGACGGCGCGAAGCGCGGCCAGCTCCCAACCCTCTGCGTCATCCGCCTCGT  
CCATAAACTGACGCTCATCAGGCTCGGCATCTAGCCAACCTCGCGGGCTGCTTTTCAT

GCTCTTGGTTTGGGTGATGCATGGCATTGCTCCGGATGTGGTGTGCGGTGTCTTGGC  
ACACCGACATAATACCGATTTGCATGCAAGCATGCAAGCTGTCATGCATGCAATTGC  
ACATCCTATTCTTGGAACTCGCGGCAATGCCGGGGGTTGTTGCACCTGGTCGATC  
GCTGCGCCTGGTCCCCGGCAACGCTCCACACCTGGTCGCTTCCGAAGCCGGCCACCG  
TCCCAACGGCTGGACACATCACCAGCTCCACACCTCACTCCCTGCTGACCCGCTGTT  
GAGGATCTGTCTGTCGTGCGTCGTGCGTCCTCAGTGGCATGTGGCTGCATGACGCGGCGGC  
TTCTGCAAGCGGAGCGCGCCGGGGCGAGGATTAGGGCCGACTGGCGATGACGCGGC  
ACGCGGCATCGGTGCGCAGCACCCCAAGCCGGTGACCGCTTGCGGTACGCCCCCG  
CCTGTAGCTGCTGACGGTGCCCTTTACGCCGTTTTGGTTCGTTGGAAATACAGCACGC  
CATATCGCGTAACCGAAAAACCCGAACTCATCGGCAGGGTCAATGGAGTCAGTGC  
GAACGGCACACCCAGCAGGAAGATCGCCACGTTTCGTAGAACGCCCTTGTTTCCTTG  
CCCTGTTACTTTGGACATGACGATGATCGGGATCATGGCCGCTCCCAAACACACCAG  
GAGTAGCGCCAGATACCGCGTTGGGCTCACCTCGCCATCTGCAACCAGGAACGGAG  
CTGTCTGCGCCAAAGAGTCCGAAAATGGCGTAGCACTGCTCCTAGCGACAAACGCA  
AATTTGATGAGTGTCTGGGATGTCTTTCATGGTGCAAATTCCGCCAGTGCAGAGCGAT  
GGGCGATAGGGTTTGCCGGATAAGTCAGCGACGCGGCGAGACTCCACCCAGCGTTC  
GTGCCGAACCAGCAATAGGCACCGTAGTGGGCTGAGAAGTAGACCGGGTGACCTTC  
AACCCTGCAACTGGCACGCAGTCACTTGCACTGTACAGGATTCTTTACGCAACGC  
TATGCTTGCGGATCGGTGTAGCACTTCCTCTCGCGTTGCATTTTTTCGGCATTGTTTTG  
CCGTCAGAAGGCGCGTGCGGACGCGCAGTGCGGTAGCGCTGCCATTCGGGCAGCGG  
AAGGGCTTGTGCATGCGTCAGAACAGCATCGAAGAAGGAATCGAAAGCATCTACAC  
AATTCTGATATTCACTTACTGAGTCGTGTCGTTCATGATCTAGCCTCTACGATTTTT  
GCCAGAATTCAAATCGCAATAGCGCGCCGTCAGCTAATGCAGTCTCAAGGCGCAAC  
GGCCCATAGTAGGAACCGAACGCGACGCGATCAGTTGGTTGCGGGGGTGCTGACCC  
TGGCAAGTACAGTGGAGAGTCGCGTGCGATGAAGTGACGAACCCCTTCTCTACGTC  
CACATCAACAATTTTCGGGAGGCGAGCCGTATGGGTCTTGAAACCAATAATAGCCAC  
TGCTCATGGGCTGGATCGGCATGCGGCCTGGTGCCTCGGCGTGGGTGATCATTGGAC  
GGACCTGTGCTGCGGCAGCTGGCGCTCCACAGCTTCCAGCTGTGGCAGCAGCGCTTT  
GGCGACGCTCGCCGCGTCGCGCCAAAACGTGCCGCTGCCGCACGCACTGACGCCGC  
TCGCATTGATGGCTCCGGTGATGTCGAGAATCGGCATCGGGCCGATGACATGCCGAT  
GCACCGCGCCATCGGCGGTGTCCACTGCGGGAGCGGCGCTAGCCAGCAGCCACCGG  
CTGCGATCATGCCCCTGACCAGCGCTAACGCAGGATGGCGCAGGAGCTTCATTTAGC  
ACCTGCCCCGGTAGCGTCGGGTGCGGCAAATAACGGCCATCT

>CONTIG\_106\_length\_4643\_cov\_16.615589

GTGTGGGGCAGCAAGGGCAACATGCCGCTGGATCGCCGCGCGCCGGTGCTGCCGGG  
TGTGATCCGTGAATCGGTACGCAAGGCCGATAAGCATCACCTGACCGGCAAGCCCA  
CAGAGTTGATGCGGCAGCTGGTGCGGATCTGCGAGGCGGGTGGCCGGATCCTTGAC  
CCGTTTCGCCGGCAGCGGTACTACGCTACTTGCGGCAGAAGTCGAAGGCTTATCTTGG  
ACGGGCATTGAGATGACCGAACACTACACCAGATAGCGCGAACGCGGCTAGCGGA

GTAAGTCTGGCGGGGCGGGTTTTGTTCTCGCCCCGTTCCCTTGTGTAGGGCCGCCGACA  
GGCGCACTAGGCCGAAGGATTTGCAGGTTTCTTCCCTTCCACGCGTACGGATGGCGC  
CGCCTATCCAACGTGGAACCTTGGCTTCCAAGTTTTCTCCGTCATTCGCGCAGCACG  
ACCGACGGCTGCGGGCGTGACGATCATCACGCGCGAATAGGAACCTTTGCGCGCGAT  
CAGCCAGGCTAATATTGATTTACGAACCTTCTGGCTGTCTATTTTCCATCTGCGGAT  
TGTGGGGCCACTTCCAAACATAGCTACCGCGTATCCACTGGAAAGTGGCAAGAGTG  
TTAGCGCATCGGGCGATCCGTGGCCCAGTCCGAATCTATTAGGAAGCGCGGCTAGC  
GATGTCAGCATCATGGCTGCGTCCGTTGTCACGAACGAACCTTCCACGCGGGCGCCTCG  
AGCACGGTCCAACCTGCGGTTGAAAAAAATTGGCGCCACGGTGTCCGCTAGCGGAAT  
TGCGGTGATGACTGCCTCGCTATGGGCTGTAGTGAATTCGAAATCGTCTACCTCCAT  
GAAGTCCACGAGCTGGAGCGCCTCATCAAAGAGCTCAGCGTCGCTTTTTCCGGCATT  
ATCCGGCCTTGCGCGTAGCGCAATCATTGCCTGCTGGGGAGTGCTAAGCAGCATTG  
CGACACGCGCTTAAGCAATTGACCATTAGCGTGCTGAATGCTCTGGATAAATTCAGG  
GGTTCGTACAGCCATGGCGGCAAAAAAGTACGAGAGTGCCCCCTCGTGCTTCTTCCGA  
GAGTGGCGACCCTTTGATGAGAGCTGGTAGGTGATTTCGCAGCTGCGCCTTCAATTGC  
GGCTAGCGTGGCTTCCAACCTCGAAGCGCTTGCGCCCTTGGTCATCAGTCAGCGTGTA  
AAGGTGCCCCGGTCACTGCCGTGTTGTCGGGCGCTTGCCCTGCGTACCTCGCCCCGCGT  
GCGGTCATAGACCGACAGCAAGCCATCATCTGCTGTGAAACCCTTTAGATAAAAGC  
GTGGCAGGAAGTGCTGGCGCTTTGGTCCCGTCAATAAGGGGGGCTTGATCGGCTTCCG  
CTGGCGCGGGCGTCGTCATTGTTTCGTATCAGGGAAATGATTCATTGGCCGATCCTACC  
AGCGCTCGCATGGCAGACGGCCAGCCCAGATCAAGCGTTGAGCACAGGGCGGGCGCC  
CTGGCGCGCGCAATCGTCGCCCCGCCACGCCTGCGCTCTTCATGGGGGCTGTTTCGCT  
GCATACCCGCAGTGGCGTGAGCGGCCTGGCAGCATTGACGCCGTCGCGTGTTTCCTCC  
CCTCTCCTTGGCCCTGCAGAAGCCTGCACATGTGGTGGTCCGTTCCCTACGGCTTGGC  
CTGCCTCGGGGCCTTCCATGCAAAAGCTGAAATTCGATGTGACCATCGGGATGAGG  
TAATTGGTGATTCCCCAACTCAAGCGGGCCTTATGTGATTGATTTTGAAAGAAAATT  
TATGATTACCCTTTGAGGTGATCTTAGGTAATCCGATGCGCCAAAAAAGTAATGTC  
ATTGATTTATAAAGACTTTTTCTTGCCTAGATTACCTGGCTGAACGGTAATCTAGT  
TACCTTGAGATTACCCTTTTATTACCTTCAGAAGCTGATCATAAGTATTTGATAATAT  
TGTATTTTTATGTGTTTTGCGGAACTCATTACCTAAATTACTCAGTCCCGGTGGTCAC  
TTCCAGAATCAGTTCTAGACGCGCGTCATTACTGTCCAGGCCGCTCATCTCACACCT  
CCTAGCGCTAGGCACCCGCTCGTGGTCGATCGCCTATTGCACTGGCGACTAGCCTGA  
TCAGGGCTAGGTGAGCGGTCAGCACGGAGATCTCTTGCGCTTTCAGCAGGTAGCGC  
GGGGCAGGTCTGCTAGCGAGGTGGTGAAGCGTCCGGATAGCAGAATCTGCCGCGAT  
GCCCTAATCAAGAGCATGGGGAAATAGCGTCTAAGGACTGAGTTCAGTGGCAAGTT  
CCTGCCGACGCGTCACTTCGGCCGATGCCAGGCCAGTGCTGCCCTCGCTCAGCTATA  
ACTGAAACCGGAGCCATTCGTTATGGATGCTGGCTTTTTTCTGCCAGTTTGCTCACAG  
CTGCTTGATGCGGCTCCGACCGGTCGCTTTTTGTGGGTCGATAGTCTTTTGTGCATCG  
ATAACCCGCCAGCATGCGCGCCAGCGCAACGCCGCAGCGGCGCCGGCCCTGACCG  
GACATCGGGGAGGGGCGGGTATGCCTGGGCGTGATTTGACAGCGACAATTTTAA

TGTGTAAATTCGGCCCCACGTCATTTCAATGAGGATATCGGGCGTGTCTGGGTACGGAA  
AAAATTGGCGAAATCTTGTCGAGTAACATCCCCAAAGAGTTCCTGCTGCTCGTCGAA  
TCGGGCTTTCAGGGAGCGCTGGAACGTGCGTCAGCCGTGGGGCGCAACTTCCAAAA  
GGGGCACCGGAGTACGGTGGTAGGGGTGCTTCGCCACTACAACCTCAACGAGGCTC  
TTAGCTCTGCTTTCGCTGAAGCTGGGCTGCGGCATGGAGGGGTGAAGGGCAACCGG  
ATCGTATTCGGTGTCTGCGGGCATCACGACTGTGGCTCGAGTCCATCTGAATAAGGGG  
CCGTGGAATAACTCGCGTCGTAGCAAGGCCAAGCAGAAGCTGTCCGAGCGCAATGT  
GGCGGCGGCCAAGCTGGTACAGCCGGATCTGTATGAAGCCGAGATTGCGGTTCCGG  
AAATCACGGCGTTTCTGATCACTGAGGGCGACGGCAGTCCGGAGCAGCCCGCCGAA  
ATCTATATTGTTGTGCCGAATGCCGTGATGGATCTGAAGAACCCGTTGTTCTGTGGAG  
ACAATCGGTTTGTTCCTCCAGCGCTATGCCAAGGTGGATCAGCTCAGCGACATCGCA  
CATCCGCGTCTCAAGCTTGGCGTCCAGATCAATCCAAGGACAAGTACTTCCGATGAG  
TCGCGCGATTGAAAATTTCCAGCCTGCACGCTTAGAGCAGGCCCTTGCCGCTAGGTC  
ATTTTCTGCGGTCGAACTGGCAGCCCGCGTTGGTGTACGTCGACGACTGTAAGTCG  
TTGGCGAAACAAGGCGCAGTTGCCGAGCGGTGAGTTGCTTTTCAAGGTGGCCCAGG  
AGTTGAGGGTCAGTCCCGAATGGCTGACACGCGAGCCCGCACCTCAGACGTCGCGG  
CCGTATTTCCGCGGCAGTATTGCCCAGATGAAGGGCGATCGCGCGCTCCTGTACGTA  
CGTATCGAATGGTTGGCGGAGATCGCTTCTCTACTCGAGAGCTACGTTGACTATCCT  
ACTGTCAACGTGCCGAGGCTTCCGTTCAAGAAGGCGAGCGAGATCTCTGATCAGGA  
CATCGAGCAAGCCGCCATGGCTTGCCGCCAAGCTTGGGGACTGAAGGATGGCCCCG  
TTTCGGATGTGGTGCTGCTTCTGGAGAACGCGGGCGTTATTGTTGCGCGCGAGGAAA  
CGGGAACCGCTCGTATTGAGGGGCTATCGGCTTGGACGACGTCTGGGCGCCCCCTTG  
TGCTCCTTTGTGCCGACAAGGCAAACGGTTTTAGAAAGTCGTTTCGATGCTGCCCATG  
AGTTGGGACATCTAGTCCTACATAGCTACATCGAAGCGCCAAACGATGCAGCCACG  
CACAAGCTGATCGAACAGCAAGCGCATCGATTTGCAGGGGGCTTTTTTGCTTCCAGCG  
ACAGGGTTCGTGAGCGAAGTGTCCGTGCCGGTGAGCCTGCAGGGGTGCTCATGCTC  
AACTGCGGTGGGGCGTTTTCTGTGGCTGCAATGATCCTGCGCCTCAAGGCTCAAGGG  
GTCATTGAGGAAGCGGACTATCTTCGCCTTATCAAATTGCGATCGGCCAAGTGGGGC  
ACAAGCAGGAACCCAAGGATGAAGAGCGTACCCCCGAGTTGCCACGGCTGCTGGG  
ACGGACTGTCGACCTGCTTACGAATCGGGTGTTGTAACAAAAGAAGCGCTTCCGGC  
GTTTCGTTGGCTTGTCTGGGTGCGGATCTGGAGGGGGCTGCTTGGACTGCCGTGGGGTGC  
CCTGACCCGTCTTGCGGCGGAAGTGGTTACGTTGGGCGCGGGCCGCGCTTCCGTAGA  
GTCAGGTGCCGCAACTGCAATGCGCGAAGGGACAGTCGTGACATTCCCGGGGCGGC  
GCAGCTAGGGTCTTAGCAGGCGTAATGTATCCCTCGAACCTCGGGAAAATTCGCTAG  
CAACCTTAGATGGATCAATGCTTTGTGGGGGCGGTTTCGGGAAAATTCTGAGCCCCA  
ACCTATTGATCTGACAGCTAAGTTGCCAAGACTCATAATCCTTTGGTTCCAGGTTTCG  
AATCCTGGTGGGCCCAACCAATAAAAAAGGCACTTGACGCGAGTCGAAG

>CONTIG\_107\_length\_4635\_cov\_6.492014

CCAGGGCCGCGGGCACAAACCCACTGCTGCTGCCCAGCGCGGCCGCGGTGGCCGCA  
CCGCCGGCCCAGCCGCCCGCATTCCGCGCAATGGCGTGCTGAACCTCCGACTGCGCG  
GCCGTGGTGTGTCCTGCTCCATCAGCGCCGAGGCCGTGCGCGCGGTTCATCACCGCA  
TCCGCACCCGTGGCCAGGAGTCCGCCGGCACGGGTAAGGCCGCGCGCAGAGGCTTC  
GCCCATCAGCAACTGCATGGCGACTTCGCCACGTTGGCCACGCGGCACGCGAATGTT  
CTGTGCGGCCTCCTCACCCAAGGTCTGCTCGACCTTGAGGATGCCCTGCTCGGACAA  
GACCACGCGCCCGTCGTGGTGGGCGTTGGCGATGGCGAGCGACAACCCGCTGCGCT  
GAAGCTGGATATCCCCGCCCGAACGATGGCGGTGTTGCTGACCTGAATTTGGTTGA  
GTGCGGTGACGATGCGCGACTCGGAGTGCGCGACGGCACCCCAGCCGTGGTCCACC  
CCAGTAAAGCCCTTCAGGGCTTCAATCTGTTGGGCATGGGTCTGCTGGTAGGTCGGG  
ATATCGCGAAAAAAGTCTTGAACCTTTTGGTTGGTCTGTGCAGGGGTAAACCAACG  
GGCGTATTGGTGTTCAAATCGCCGTTGATTAGGCCTACTTTGACGGTATCGCGTAAG  
TGCTCGACGCGCTGGACAACACGGTCCATCGCCGTTGGGTGCGCCCTCCAACATGGCT  
TGACCATCTCTGGAGCGTTCAATGAGCCGCAATTGCGACAGCATTCCATACTGATAT  
TCGCTGAGTGGACCACCGCTATGCGGCGTGATGCCCATCGTTTGAGCGAACGCGGG  
GTTGGCCGGCAGGAACAGTCGGTTTTCCGGTGCGTGATGTCAAACCTTCCCCACCCG  
TTGCAACTCATCAAGCAACTCGCTGTTCTTCAGCGTCTGATGCTCGATGTTGTGGTGG  
TCCTGGAAAAGCGTTCGGTAGTTCGGCACAGATCAGGCTCCTTCCTTGACCTTGT  
TGCTCGCCTTATCGGTTGACCACGTCGTAGAACCAGAGGCCGTCCGACTGTCCATCG  
GTGCCGATACCGGCTGCTTCTACGGCGTCCTTGAACAACCGGTTCGCAGAAAACGCCC  
CCGTGGAAAGCCAACTAAAAACGTGCGCATCACCGAGGACATCACGCTTGAAAGC  
CAGGCGAATTTACCCGTCAGGTCGTAATACTTGCCCTCCTCGAAATCATCACTGAC  
TTCGATTTTGAGCATAGATGCATCCTCATCCAACGCATCCAATGTGCGAATCACTTC  
GCACAGGTAAACGTTTGGCCCCTTCGAGCCATCGGCCAAGCGATAGTCTGTCTCGAC  
AAACGCGAACGCCCCAGGATCCACCGCTTCCATCACTCGACGCAGGCGCTCTGACA  
CCAGCCAGTAGCCGCTGAATCCCCCTTCAGGTCTTCAGGAGGCACGCCTTCACTAG  
GGTGGTAGACCAGGCGTGGAACCTCGCGCAAAGCAGGAAATCCGCCATCCTTTGGC  
CTCAGAATCAGCCTAGGTGGAGTGAGGAGTGCTTCTCGGTTCTCAAAGACAACTCCA  
TGGCCTTTCCCCCGCGCCGAACGTCCGGCTGCAGGTGGAAGAACTCCCCCTTCTTG  
GGCTGATTGGTCGTCGTTGTTTCCATGCGTTGCGTCCCGTCCACCTGGGTATGGTCTC  
CACTTCAGTCGGCCAGAGTCTACCGTCCCGATCGCCGACTTGGGCAGACAAAAAGG  
AACACGCCCAACACCGCGCTGCTCGTGCTAACGCGTCAAGGTGGCTCAACGCCTCG  
CCGGCTGCCACCCTGCCCGAGCTGCCTCATTGGTGCTACAGAACATACGCTCGCCAC  
GGCTCAGGTGATGCTCGTGCGCTCGTAATCCCGCTGGCCTGGCACGTGGTAGATCT  
TCTTGCCCTGACGGGAGATGTTGCCCTTGGTGCGGCATCCGCTGGACACGGATGGCG  
TGGCCACCTGAGCCTGGCGGGCAGCCTGGTCCCGCTTGCCGCGCCGGTAGTCCGCGG  
GCATCTGGAAAGGCCCTTGCCAGAGGTTGCGCCGCTGCTGGCGCGCATCGGCTTCGT  
CTGCGATGAACGCCGTCGCGTATTGGCGATACGCGACCGCCCAACCGGATCCCACC  
ATCCACCGGTTGACGGATTGCCCTGGACGAAGCACTCGGCCACCACTCGGCCGTA  
GCGGTCCGTGTCCTTAGGCTGGCAGCGAACGGTCTTGTCCAGCACATAGCCGTCCAG

CGCGGCGGCGGAGCGCCGACCGCAGGGCCAAGAGCGTCCGTCCTTGGTGGTGCATT  
GCTGGGTGCTTTCCGGGGCATCGATGCCCCACAGGCGGATGCGCTGCTTCGCCACCG  
TGAGGGTGTCCCCGTCCGTGACGGTCGCGCGGCCGACCAGTTCTGCTGCCACCCAG  
GAACCGAAGCAAAAACCAAAAGCAAAACCACAAATCCTTTCAACACCATCAACAAC  
GACTTCCTCTAAGCGCACGCCCTCGCGGCGAGCGCCAGTTCAAACGTGGCCCCGACAT  
TTAGCGGAAGTGGA AAAAGAAAACCGACCAAATCGAAATTCGTCAGCCCTCAAT  
TAATTTTCATCATGCACCGTGCTCGAGAATCTCGCATCTAGGTTTTTCTGCGAGCGAC  
CCAAAGCCTTTCAAAATAGCCGCCCTTACCCTTAGAAGACGGCACCGCCCAACCA  
ATGCCGGCGAAATCGCAGGCACGCTGGAATGCATACAGAAGCGTCGGCTGACCGAG  
CCGATCAAGCCCGCGACAAATAATATATGCCCTTGATGGAAGATTGTCCCTAATCAT  
GCCTTCCGATGAATAGCAACCCATCCCAGAGCAATCGAAGGTTCTTCCGCCATCGTC  
AAAGCGTTTATAATCATCCACCTCAAGCTCCGCGGCGGACATTGTCGACCGACGAAT  
ATGCTCCTGTTCTTGCAATTTTTCGAATCTAGCAGCCGTCTCCCTTGCAAGTGCCATT  
CCGCTGAAATAATCTTCAGGATCCACACCAACGCCGACCTTATAAATCCAGTAAAG  
AGCTCCCCACTCTACCGGGCTAATGCTGGCACCACGCTCCAGAGTTAGGCGCTCAAA  
AAGATCCGATGAACTTCAGAAAGTGGGATCTCCACACCCAACCTTATCGACAACC  
ACGCCTTACTTTGAATATTGCTCAACGCCATTTGAAACTGCCTCCAACCTCAACTCCG  
GCTTTGCTTCCATCTCCTGGCGGTGGAATCCTCCAAAATCTGCTTATTCCACGCAGT  
TCTCTGAGGAAGACGATCCGCCAAATCAACAAGCTCGTGTCTCTTATAAACTTAGT  
CGCCCCACCGATATCCATTTTCATCTAGCTCAAAACCAATCAGAAAGAGGGCATCATT  
CACATACACTCTATTCTCATCAAACCAAGACTGAAACGCATCCAGATTGACTTGTCT  
GGGCATACCGGAGTGCTCAACGTCTCCTTTGGTAGCCGCATAGCGGAAGGCATCTCC  
ATCTACATCGGCTTTTGAGAGCTCGCAAACCATTTGGACGCATCTTCTCCATATGGGG  
CATCAAATCCGGCGCACTTTGGCGGACCCGATCCATCAGATTATCAAAGAGCCTCGA  
AAGATCATGCGTTCCGGGAGCAGTTATTTTAGCCCTTCCAATTTCCCTACTCGCCTA  
ATCATTTCGTTTTAAACTGAGCTCCACATAGTGCGGTGCACAGAATATTTGAGGGTAA  
ACAATGGCATCTACCATCACATCAGTCCCAGGGCAGGGCTGCTCTCCGCCGTGGGCA  
ACCTGCCTAGCCACTGCGGTGAGAGCACCGACCGCCGCCTCGTAGCCCCAAATGTAT  
GCCAGCTCCGTTGGCACGAGCGGAATTCTCCAATGGTTCGCATCCATCGCCGGATCT  
TCGCCGTCGTCAAACGGGCCCCTCAAGATCTCCTTAGCCATCAGACTGTCCCTCGTT  
ATTGTCAGCCGAGGATCCTAGCAAGCTCTCTGGTCATTGTTCCATTCAAGCATCTAT  
GCGGAACGGTAAAATCACGCACCGCTTGATCGCCCTTCGACCAGCCCTGTGGTGCCT  
CATATCTAATCTCCCGATCCGCCGCTTCCATATGCCTGAGATCGCTCGGACGACTCG  
CTATGTCCACGAAACGTACTAGAGTGACCTTACATTGCTAGGCTCTGGCGGCAGACC  
TCTGAATACCGACACCCACTTCCTTCAAGACGGACTTGGACTCGCGCGCCCGGGAGA  
AACGGACGGGCACTTTAGCGGGAAGCGGCAAAGAGAGGGAGGGCTATGCCCAACC  
CCTGCTGGCGAGGCTGATGTGCTGGTGGCCGCCAATGACTAGATGGTTCGAGGACTC  
GGATGTCGAGAAGCGCCAGCGCCTGCTTCAGACGGTCGGTGACTTGGCGGTTCGGCTT  
GGCTGGGCTCCGGATTTCCGCTCGGGTGGTTGTGGAAGAGGATGACCGCGGCAGCG  
TTGAGGTCCAGGGCTCGCTTGGCGACGACTCGGCTGTGGACTTCGCAGCCGTCGATT

GTGCCGTTGAAGAGGTGCTCGGTGGCCAGGATGTGGTGCTTGGTGTCGAGGAAGAC  
GACGCCGAACACTTCGTGCGGCAGGTGGGCGCAGCG

>CONTIG\_108\_length\_4623\_cov\_10.571619

GTTCCACGCCTTCCGCCATACGCTGGCCACTGAGCTCGACGTCAACGACGTGCCGGA  
GAAGGAGATTGCCTTGGTCACCGGCCACAGCACCGACCCACGGGATCGGGTCCAGG  
TCTTGCGCCAGCACTACCTGCACAAGAAACCGCAGGTGACGCGCAGCAAGCAGCTT  
GCCGCTTTAGAGCTGTATCAGCCCAACGTGGAGCTGCCGCGCTACCAGCGGGGGCA  
GTTTGCCAAGTCCTTGGCAGATTCAAGCAAGTTCTACCCGTAACGCATCGAAAACGC  
TGGCCAGCGAGAAGTTCTCGCTGGTGCGCGACCGGATGTCTGGCCTGTTGATCCGGA  
GGGCTGAAGCTAGAGCTGGCTTAGGCCAAATCTTTTGCGCGCGCGGCTGCTAGCTCC  
TTAGGCAACTTTAGTGACGCAGTGGCATCGAAAACCAACTCTTTTGGGACACTTTTC  
CAAAAGGACTCAATGGCGTTTGCGAATTCGTCCAAATGCGTGTCCGTCACCTTCATG  
CTGGTGTTCATCAGGGAATGCTCGAACCCATCCATTGACCACTGGAACAAACTCTGGG  
TAGGCCAACCGGAGATCATCCATTGACCTCCCCTCGCCGTGCTTGAACACATTGACG  
ACCAGTCGCATTGCATCTAGGCGAGCATATCCTGGGAAGGTCGCAATATTCAGTCCA  
AGTGCCTCCAAAAATCTTTCTAGCTGGGTGCTATCCATCGTCCACATTGCCCTTCTCG  
TATGGATACCTATAACAAACCCAGGTAGCCGAAGCTGATCCACCAAGAACCGTCGC  
CAAGCTTTGTCCCAAGTGATGAAACATAACCCGCCACAACGCTTAGGCGAGTCCGCTCG  
TGCATTTCCGAGAGCAACTCATAGAACATGATTCCATGATTCTGGGCATCCTCAGCC  
TGCTCAGCCTCGTCGTGAATGTCTGGGTGCAAATTACGCCCCGAGGATTCCCAATAA  
GCATCCGCCGCAGCATCTGCCTCCGCCGAAATGTTGCCGAATGTTGAAAGCAGCCTC  
TCCTTCGCCTGTTGGACGTAGAAGCGATGTCCTGCGAGCAGCGAATGCCTAACTGGA  
TCATCTAGCATGAAAGCAGAACGCATCTTGGAGGTCATGCTTCTTCCTCGACTTCAA  
CCGGAAGCTGAGACAACCAATTCACCATCTCACGAACCTCCTGCTGCATCCTCACAAG  
TAGCGTCCACACCCTTGGTCTCAATATCAATCTGACAAGTAAGCCAAGCGTGTTCCGG  
TTTTTTGCCCGAGGCCAACGTGAGGCTCTATAGCGCCACGACTCCAGAGCCAGATGG  
ATTGATCGCGAAGTTTCGTACCCAGCGAGGCGATGTGAGCACTAGCATCCGCCTCTC  
CAGCTAGAACCTCAAATGCCCTGGATGCCGGACCACGCGCGTCTTTCTTAGGTAGGC  
CGCTTGCGTCCAGAGTGATGACATCATTCTGAGCAAGTCTCGCAAGGATTTCCCTGC  
AAGTAGCGATGTCAGGATCATCTTCCGCGAGGAAACCATGCACCTGCGCGTTCCGA  
AAGGCATAATCAAGATCCACGATGGCGCACGCGGGAAGACCCAGAGCCGCAAGGA  
CCTCTATCGATTTTTTTGGTATCGGCTACACCGCTCATTGGCACAATCGCCAGCGACG  
ACTGGCCCAACGTCTTACCGGCAATGGCCTGGAAGAGACATGGGAGCAGCCGGAGC  
TCTGTTTTTTCCTTCCGCCAGGATCACCTTGTCAGCGAACAACACCTGAGAAGAGTTG  
GTCAGACTAAAGATTTGATGCATCTGGTGGGTGGGATTCTCCACCAACTGTTCTATG  
ACGGATAGCAGGCGCGGCCTTGCTCTTGTCCCGTGAGGATGTTTCTTGGTCATCAAC  
AACGCGTTCTTCGCATCCTTGGCAAGGATCATCTGCGCGGAGTGCGTCGAGAACACA  
ACCTGATACCCAGCTCCGACAAAGCTCGAAGTGCTTCACGCACCTGTTCCACGGCG  
AAAGGGTGATGAATAGCTCTGGCTCATCCACTAGAAGCAAGGTGGCGCCACCGGC

GGCTGCCGCTCCTCTCTTTAAGTCAGCCAAATGCCGGACCATAGCCATCTGAATCGC  
TCGCTGCGCTCCATGCCCATAAGAGCCGAAGGAACGTCCCTGCCCGTTACCTTCGTA  
GACCTTGACGGTCCCCGCTTTAATCAGGTCATTGAAAGCCGGAACAGGGAAGTCGA  
GCTTGATGCTGATCCCAGGGAACAGGTCCGAGATCTTGCCGTTGATGGACGCATCGA  
TACGCCCCAACTCGTCAAAGCGGTCGCCCCCCTCAGCTGAAATCATGCCCAAAATTG  
CTGCCAAATAAGGAGTCAAGGTTTGCTCGTGCTGCTCTTGAATAGCAGACAGCATCG  
ATGCAAGCAGCTTTCCGATGGTCGTAGTCGTCTTGGCCTTGCTCGCGTCCTCCTCCGC  
GTTCTCCATCGCCCCAATGCGGATGGGATCCGGAAACAGAGCAGTGATGGCGTTATC  
GATTCCAGTCGGATTAGGGTCCCCTGTTGGTGGCTGGGTCCATAATAGTCAAAGT  
CACCTCACCACCAGGCACTTCCTGGACTCGCCGAATTTTCAGGATGCCGTCGTGTAT  
ATGTGGCTCGATCTTCTTACGGTGCTTGCCTTCCAGAACATCTAGATCAGCATCCGTG  
ATGCCGACCAGCACCCCCGTAACCTGGACGGGTTGAGCTGGGTCGTGGAAGTCTTC  
AACGCCCCAACTTGGCCTTTCGGACTAACCCTGCAACGCTGTGAGGCAGTTGCTCTT  
TCCGCAATTGTTTACAGACCGACCAAGTGGAGTGAAGTTGGTTAACTGCAAGGAAGTAG  
CAACACAAGAGCGAAAATTCCGGATATCCAACCTCTGAGATGTAAACAGCCATTTCCTT  
TGCCCCCTAGTTTACGCGGTGAATTACTGAAAGCTGCCTTCATTTGATCCTAAAGGCA  
ATTGTTGTGTTTCGCCACCAAGCTCAACTATCACGTAGCCGCGTTTTTTCCGTTGCTGT  
GCTGCTTGATAGGTAGAACACGCGCTTTCCTGTGCCAGTCAATCCCGCCGCTTTTT  
GCTTAGTTACAGGCGGCCGGCTTGCAATGGCCTGTCATCGATAAGCGAGTGTCCAG  
TCGCATGTGCCAGGCCCAAGCCTCGAAATGGCATCGAAGCGCTGCCGATAGTCTTC  
TACCTCCCAGAGCCAAGCCTCCTGCATTTTCATATCGCGGGTTGTATAGCACCCAAAT  
CAGCCGATCCCCTCGTAGTTCGACGGCTTGGGAACCCGGGTCCTGTGCTGCCTCG  
CTTACCCTGGGTTCGTTTTCCCTTCACTTGGTAGCGCAGACCCTGATAAACGAAGTC  
ATGGCCCCGCTGGACGGCAGTCGCATCGCGCATGCAAGCAGAGTAATCAACCAGGG  
AACATCCCCAACAGCGCGGCAGCGTCGTATTCCGACAATGCAGAGGTGATGGCAGGA  
GCATTCCCCAAAGGCGGCCTCCCAAGCCAAGGAGGCTTCAACCAGCTGCTGGCGCAC  
ACTCTCCATCACTACTTCTTCAGTCCCAGCCAGGTCAGCACAACTGTTAGCGCAATC  
GCGAACAGAAGGCCAATCACGGCCTTGCCCAGATTATCGGCCAGCCATGATCCCAG  
CCTGCTGTAAACACTTGCCTCACCTGGGGGGCCATAGATATAGCTCCCCGTGACGTC  
CGCGCCCTCACCTACCAAATCCTCATTGCTCCAGAACAAAGTGCCCCATGAACATGAC  
TGGGCCGCCCCCTGTTGTTGAGCTCATCGGTGTGGCGGCGACTATCTTCTTGCAGCCTT  
TCAAGCGTGCGGCTCAGCAGCCTGCGGCGTCACACGTATCGAGGTCCAAGTGATGTC  
GCGGGTTTGGACCACGGTGCGGTGCGATAAGCAGCACCGGTTTGCCTCGCTTGTAGGG  
CCTCACAAAACGCTTCTTCAGTTCCTTGGCGACAAGTCAACAAAGAGGGCCTGCTT  
ATTGTCGGCACCCCTTGAGGGTGACGAAAACGTGGTGGAAGCGTCCGCTACCTTCTTG  
GGCGGTCATGCTTCACTCCATGAGCAGTTTCTGCACCAAATTCTGATTCTTTTCGTGT  
AGCCCTTGTGTGACCACTCCATGGTGATTCTTGCTCATTCGGATAGCGCAAAGCAGA  
GATTACTTCTTGGCTTTGCTCACGGCAAAAGATGCCTTCTCCGAGGCACCGGCAAAC  
TCACGCATGTGGCGCAGCAGCTCCTCTTGCTTCGCTGGAGGCAACTGGGAAATCACC  
AAGATGGCCTCCGCCATGATGTCACTGGCTGCATGGAAATAGGCCACGGGCAGCTC

CAACGCCTCCGCCAGCTTTGCCATGCTTTCGTTGTCAGGCATGCGATCCCCTCGCTCG  
TAGCGCGAAATCCTGGGAGCTGCCGAGTTCTGTTTCTCCAGCCCAAGAACAGCCCC  
AAGGCGGCCTGGTTCATGCCCCGCGCAAGCCTGGCCTCACGAAGGCGACGGCCAAA  
GGTGTATGCGGGAGGCAGCGGAGCAGGCATGAAGACCAACGAAGGATGAATTGAC  
CCCCAAGTCTGCCGCTTCCAATCCTGCGCTGCATTTGCCATATTTGCAAATACGCCA  
AACGGGCGGTATTGCAGGGG

>CONTIG\_109\_length\_4591\_cov\_97.648970

ACCGGTACCAGCACCTTCTGACCCTGGTAGTCCTGCTCCACCATCCACACGATGTCC  
TGCGTCAGCGCGGCTGCCTGCGCGGCGGTGAGGCCACGCCCATGCTTAGTTGCAAC  
TGACCTGCGGCGGCCACGCCGATTCCAGCAAGGCGCGGTACTGCGCCACGCCATC  
GGCGTAGTTGCCAGATAGCGGCGGCCGGTGAGCTGGGTGATCTGATCCAGCACCA  
GGCGCTGCTCGTAGAAACCATCGCCCAGGCGGGTCTGAGTCCACTCCGGGTCTACGC  
CCAGCTTGTCCAGCAGGAAGTCGCTGCTGATGAAGTTGTCGTAGTTGACGAAGCGCG  
GATCGGTCTCGATCAGGTAGCGACGGCCGGGGCCGTTGCTGCGCCAGGCGTTGATG  
CCACCAAGCCCATTGGCGGCACGGCCCATCGCGGTGCGATCGGTGGCGGTACCGCT  
GGACAAGCGATACAAGCCGCCAATGGGCAGATCGATCTGCGTCAGCGAGGTTTGCG  
CGCTACCCACAATGTTGGTCACCGGAATGGTGGCCGGATCGACTTGGGTACGGCTGT  
CGTTCGCGACGGCACCTTGTGCGCCGACACCATTGAGCGAAGCGCCGCTAATGCCAC  
GACCGTCGCTGCCGACGGCCCCATTGCTGATGTTGGCGCCGTTGATGCTGACGCCTT  
CCGCCGGTCATGCTGGCGCCCAGGGCGGCGTCCCGCTCAATTACTCCGTCCCTGAGG  
TTTACTCCTGAGGTTTCGAGGTTTCGAATTTCTCAGCCGTAGCTGCCTGTGCGGCTGT  
CGGAATGGTTACGGGTCCACGCGCCCCGCTGACGTAATTTTTTCGGGGAAAATGCAT  
TTATATAATCAGCTAGCGCCTCACCTTAGTCATTGGAGCAAGGACAATATTTGTAAT  
TTTCTTCCAAACATTAACCACTCAACCTTCGTGACAACCCCGTCCCCACTCACTCTA  
GCTATGAACATATTTCTCCGTTTGGAGAATATAATAAAGCCACTTTTCTCATCCAAAT  
CTTTTTTATAGTTGCTTTTAATAAGGCCGGATTCGAAATCCTCCCACTTCAACCGCG  
CGTTAAAATTTTTGAAACCCCGCCAACCAAAGAAAATATCAACGGGAATAAAAATA  
ATCCAACACTACCATGTCAATGGTTGCCAGCCTATTTAGGGCGTACTCAACACCAAAAC  
CACTATCAATGACAATGTAAGAAATAGCAAAAATCGAAAAAAAAGATCCAACGAG  
AAAATAAATTGTTATTATAAATTTATAACTGAAAATCGATAAAAACCTTTTCTGTAA  
GTTTGAAATCACCCCCCCCCAACAAACCATCAAAAATTGCACCAATCATTTCTTTGTA  
TCCTCGTCTTTTTTTTCAGCGTAATGGTCAGCTACCGCATTAGCCGCAGTCTTTACTG  
ACGTGCTCACGGCCAATTTATTGGCTTGTATAACAACCCCAACAGCTGTCTTTATGCT  
TTCCATAAATCCTATTGGCAATCCCGCCCATCCCAGCATTTGTTGGGTAGCCATTCCA  
CCTGTCGCGCCAATAGTGGACGAAATAGCTAATTTAGGCCACGAAAATTTTTCCGAA  
AATTTTGAAAAAATTGATCCGCCATCAGAATAGGATTCCTTCACGGAACTCCAAGCG  
ACTCCTGCAGTATATGTTCCAGCCCCTGTCACAGCTCCTTTAGCCCCCAACGCCGCTA  
CCTCTGGCAAAGCGGCGAACGCTAGGCTCCCTGCCCCGAACGTTGCACCAGCAAGT  
GCGACTCCCCCAACAGATGTCATAAAGTTGCGTCGCCGCGCGACGTGTCAGCGAA

TCTAAGTAGTTCCGAGTTGTAATTATACTGCAGCACATCCTTGCTGATGCCTGCCTGA  
TAGAGGCCGTTGTAGACCGTGAGGAAGTTATCCGAAGTGAAGCCAACTCTTTTCCG  
TACAAGTGAAAGTCGTTGTATTTCAGCATCAGTTGCCTGGAAAGCGCGGCCCCAGGC  
GTACTGGTTGGTATTAGTGCTGAGGAATCTCTGAGCACTCTCATCAACGTTGGCATT  
GCCAATAAGGCCGTTGATCTCCGCATCGACTCGCGCGGCCGCTTCCACGGTTAGGCG  
ACGATTTGCTTCCTCTTCGCTGATTCTTCTGCAACGCGAATGCCTCAGCGTTTTGG  
CGAATCCATGTCACTTCATCAGGATGCAACTGCCGATTAACTGATCTCCCGCCAGC  
GCGGTCGCGCGCCAACTGCCACCCGCAATACCGCCAAGCGCCGCACTTCCTAGT  
TCCATGAGTGCGTTGTAAGTCGCCGGGTCGCTAACGCCGTTCTTGACCAGGTAATCC  
GACATCGCAGCCTTGGCTGCCTCAGCACCCCCAGCGCCAACTGCTGTCTGTAGAACG  
TTTTCGCCACCGAGGGCAGCAATCGCCGCGCCAGTCAAGCCATGCAGCAAGATTTTG  
TTCGTACCACCATCGCTCCATGCCTCCAGACGTGCCAGTGCTGAGCTTTCGACGCT  
TCATCTGGTGCGCTGGCTAGATCAAGCTGAGCTTTTTGATACATCGCCGAGGCAACA  
TCACCTACGACCCGGAACCCAATCTCTCCCGCCAACCCCATCAGTTCTTTTGGTCTT  
CGATCTTCTTCTGATCGAAGATCTCCTTCAGCCCGGACTGCTGCAACTCGGTGGCAC  
TGCGATCCAACCCTGCCAGCGCAGACTCGTCGCCATTGCGGATCTGGATCGTACCGG  
CGGCGATGTCGCTTTTGGTCGTGCTGCTTGAGCTGTCGCTGGAGTTGCCAACATGC  
T TAGTCCAGCACCGATGCCGACACTGGCCATGCTGCTACCTGTGCCGCCCGCAACTG  
TCACACCGCTGGTCTTGTACTCGGCTTTATTCTGAAGGTCCTCGACCGTCAGGCTATC  
GGTGGACAGCCGATTGAGACTGGCAGCGGCTGCACTGGCAATCGCGCCCGCCGACCA  
ACTTCGTGTTGCCGCCACGGTGATGTCAAACCTCCATTGCCTGCCTGGATGCCGC  
TCTGCTCAGTCACGCTGGTGTAGCTGCTGTTGACCTTCTGCTGGCTGTAGCTGCCGCC  
GCTGCCCCGAGCCAGTCGCCAGCGTCAGGCTGGCCTGCTGCTGTTTGCTCTTGTACTC  
ATTGGTGTCTGCTCGCTCTTGATCAGCAGATCACCGCCGACATTAGCCAGGACCTT  
GTTGCCAACAGCTTGTGCACCTTGATCGTAGTGTCGTTGCCGCTCACTAAGGTCAA  
CGTGTCGTTGGCAGTGACCACGCTTTCTGCGCGCAAATCGCTATTACCTTGGCGCT  
GCCCTTGCCTGCAGACACGGTGAGGTAGTAACCCGTCACTGCGCCGACGCTGACGC  
CGATCTCACCGCCCGCGTTCTTGTTCTCGGACTTGGTAGTGTTGGTTTCCTGATTGCT  
GAGCAGGTTGAGGTTGTTAGCCGCAGCCAAGGCCACGTTCTCGCCAGCGATCTTGCT  
GCCGACCACGTTGAGATCGCCGCCCGTCGCTGCGATGGTGACATTGCCATTGCTGAG  
GATGCGGCTACCGCCGGTGGTTTCTTCATGCGTGGTGGTTTTGCTTGAAGAACTACT  
GGCGCCGATTCCGATACGCAGACTGACCCAGCTGCATTGGCCGCACCCTGCGCACC  
ATCTGCCGCCGCTGCACCGGTCTTGGTCGTGTTTCCCGCAACTGCTTGACCGTCATA  
GCCCTTCAAGCCATTGCTCGCTAATCCGGCCGCGTCACCAACGGCGTAGCCTGCCTT  
TGCGGCGTAGAGCACCTTCAAGCGATCATCTTCGACCTCCGATCCACGCTTGGCTGC  
GCCGTAGACCGCTTGTGCAGCATCCACCACCCACCGGTCAATCCCAATGTAATGCC  
CGCACTCTGCTGCTTGGACGTCTGCACCGTATCCACGGTATTTTCCGCTGCGGCAAT  
CGTGACTTCCTTGCCGACGATGGTGGTACTTGTCGCGCTCAGCACATCGCTGCCTGT  
GATGGCGACCTTGTGCCGGCGGTCAATCGTCACCGAGCCCTCGGTGCTGCCGACCAG  
GCTTCCGCTATTGGTGACTTCGGTGACGTCCAGGCCGTCGGCCTTCTTGGTGACGCC

CAAAGCGACGCTGAATCCGCCGCCGCCGTAGAGACCGGACTTCTTGACGGTCTTCTC  
GTGTTCTTCGCTGTGCGTGTTCTGCACCGTGTCAGCGTCAGGTTGTTGCCTGCGGCC  
AACACCACATCGCCGGTGCTGGCGACCTGTGCGCCTTGCGACAGCAAATCGTTACCG  
GCCGCGATCTGCACCGTGTCGCCACTGAGCGTGGTGGTGACCGCAACGTTGTCGTGC  
CACTCATCATGCGTGGTCGTGGTCTTGCTGGAGAACGTGCCCTTCTTCTTCTTGGTCA  
TGTCTGACGCGCATCGTGCTGTTTCGCTTGCGGCGAGCAGGTTGACGTCGTTGCCGG  
CGGCCAAGCTGATAGCGCCGTTCTTGCTTGACGCGGTGGCGGCGGTCAGGTTGATGT  
CGTTACCGGCCCTGCATCGCCAGGTTGCCGCCGGCGTTTAGCTCGGTGCCGTGGACGG  
TTTCGTGCTGGTCGTTGTGGTCTGCTT

>CONTIG\_110\_length\_4583\_cov\_5.882630

CGGCGCGATCAGACCGAGCAAGTGCTGCCACGGAACCACCTGCTCCATCTCGGCCA  
GAAAGATCTCGCGCCGGGTCTGCTTGCGCTTGCCCAGGCCCTCAGCGTCACCGAACG  
TCAGTTGCATGGATCACTCCTCAACATGAGGGCGGGTAGTGTCGCGTATCTGTGGTGC  
GTTGTTTCAGAGTTTCCCTAGTGCGGCCTGATTCATATGCATGCTGCCACTCATCTGCC  
CGTTGGCGGCGCAAATGCCTCTTCGGCGAGCCGGTCTAAATAGGCGCGCATGCAGT  
GTTCGATCAGTTCCGGCTCCGTCGGCAGCCGACGCGCTGGCACGCCGACGCCCCGCA  
TATGGACGTGCGGATATGAAAGCGCCGGCACTGGCCGCCCCAGGAATGCACACAGT  
CGTTCCCAGCTCGATTCCGGTATCAGTGTTGAGCACTAGCAGGCGCGGCGCCGGTATA  
TGCTCGATCACAGCCTGGTTCCAGCGCCGGAAGTAGTCGGTCATGAAGGCGCGCTC  
GCCAAGGCGCGCGCACAGATCGCGGCGCAGGAAGTGAAGTCAAGGCGCTGGCCATGGG  
CGCCAAATAGCGAAGGTACGCTGTGCTGCCTGAGAAAATAGTTGCGCTTACCGACT  
CGAACCAAGCGTCAGGATCACGGACGGTCAGGATCACCTTGGCGTGCGGGAAACGC  
GCGGCCAGTTCCATCCAAAAACAGCAGCCGGGATAGTCGGTGGTTCGCCGCATAGCC  
AGCGAAAAGCCCGTCCCAGTCAGGGCGCCCATCGATCGCCGCCTCCCATTCGCGGCA  
AGTCCTGACGCAGGTTTCGCCGCCAATTCCATCGCGTGATAGCACCGGCCACACCGA  
GCCGCTCGATCGCCAGCTTTAGCGAAAGAGTGCCCGTACGACCCAGGCCGGCTCCA  
ATGAGCTGGAGACTCACGACGTTTCGTGCCTGGCCGTGGGCTAGCCATTGCGCTACGT  
CCACACCTAGCTCCGCGTCTGCTCGCCGGGAGTAGGCGTTATTTAAATCAGCCGGCA  
AGACCTTACGCCAGCGGCCGATTTGGCCCTGGTTGAAAAACGCCTTGCCGCCTTCGC  
GCCACAAACCGGCACCTTGCGGCACGTAACGTGCCGCATGCTGACGCATATAGTCG  
AAGCGGCAGTGCGCCACAATCGCATCCACCTGTCTGAAGAGATCGGAATGCCGAG  
AAAAGCGGCGATGAGGCGGATTTGGCCGGGCAGGTCATCGAGCAGATCGGCGTAGT  
GTAGTAGCAGCACGTTTCGCATCCTCGCCTCGTTCCCACCACGAACGCACGTTTTCCC  
ATAATGGCCAGAACGGAGCCCCGTCGTATTCCAGCCAGTGCGCCACGTAGGCATCG  
CGAGGTAGGCTCGGCGGCGGCACACACGCAACTTGCCGGATTTGCCCCCATTAGC  
GTGCAGGCGTGCTGCGCATCCTGGCTCACCGCGCATTGATGGTCGTACAGGCTCAG  
CGCCATGTCGCGGCCGTGCGCGCCGATGTAAAGGTATCTAGCGAGCGGACTAGTGA  
CCAGCGCATCGGCCGGTAGGTTGTGTCTTCATGAAGCGCCGGTGGCTCTGCGCCTTCA  
GCAGCGCGAGCTTGGTCGCCTTGTCCGGATAGACGCTGTCTACCCAAGGGGAAATTG

CCGAGACATCAATGTCCGGTTCGCCGCCAAAAATTAGCTGGGCCACGATCTGCTGCA  
GCCAGGTCGTGCCTGCTTTGGCGTAACTAGCGATCACGATATCGCCCTCGCGTAGCG  
CTAGATCATTCCATACGCTGGAATCGAAAAATCGGTTGGGATATTCCCAGGTTTTCT  
TGCGAACTTGCTGACTAATCATCGGGCGATACCGGAGCGAAAAACGCTGTGGCGGC  
ATGCGCCTGCGCCGGGGCGGCTGAGCGTATCGCTCGTGGCCGCAGCGCGATACGCA  
CATTAAAGTGGCCGCAATACAAGAGCGGGAAAGGGCGAGGGCCGCGCGTCAGGAGC  
CAGATGTAGGGTGCACGTGCGTAATATGGTGGCGATGACTACGGTCATCTGGGTCA  
GCGCCAACATGCTGCCGATGCAACTGCGCGAGCCACCTCCAAAAGGGAAGCAGCTA  
TAACGCGCCAGCGAGTGGGTGGCGGTATCGTCAAGCCAGCGTGCGGGCAGGAAAAT  
CTCAGGATCGGGAAAATAGCGCCCGTCGCGATGCACGACCCATGCACTGACGAGCA  
GTTGGGTGCCACAGGGGACATGGAAGCCATTCAATGTGGCGTCGCGTTGCGCAATC  
CTTGCGGTTAGCCAGGCCGGTGGATACAGACGCAAGGACTCCTTCACACAGGCCCG  
CGTTTGCGGCAACCAATCGAGCAAGCTGGTGCCTGAAGCGGCATCGGCATCGGCAT  
CGTCCAGTGC GTTGGCTTCTTGCGCCACCTCCTGGGCAATCTGCGGGTGCTGAGCCA  
GTAACAACAAGGTCCAGGTCAACGCTGCAGACATCGGCTCCAGTGCCGACATCAGT  
ATCGCCCGCCGCTTCGTGCGCGGCCAGTCTCCATCGCCTTGTGCGGTTTTCGGCTAGC  
AGCAGCGCCAAGACCGATGCTACATGCGGCGGCCGCTGCATGCTTCGCGCCAGGAT  
CCGGTCCAATGCCATGTCAAGATCCGCACGTGCGCGGCCGCAAGCGATGCCGGTTTG  
CAGATGGCCACCACAAGGGAGCCATGGATTGACAGCGGGTCTGCTGCAAGATGGCA  
TCGACCATAGGCAACATAAGCAGCAGGTCTGGTGC GTGTGCCGGATCACCGAGCAG  
GAAGCCGGCGCCCAATTGCGCGCATAGCCCAGTCATTAGTGTGCGCATGTCCTGTAT  
CGCACAGGATTCGCCCCGCTCGCGCAATAAAGATCGGGTGGCCACCAATGCGTGTG  
TTGCGGCGTCGCGCACCAACGTGCGACGAAAGGCTGGTTGTAGCGCCCGCCGCTTAT  
GCTGCCAGACTGCGCCAGTGCTGTTTCATCACAGAAGCAGGAAATGCAGGGCGCCGC  
ACGCCCCGGGTCCGCATCGACCTTGCCGTAAAGCGCACCCGTCGTGCCAAGAACTGT  
ACTGATCGCGGCCGGTGCGGCGAGCAGATAGGTTTCGTTTAGCAACCTTGACTACATC  
GCCATGTTTACGAACGCAGTCTTGCAAGAACGCCAAAGGATCTTCGGAAAAATGAC  
ACCGGTTGCCGAATGCCAGTGTCCGGTCGGACCCGGGGGGATAGCGCTCTTGCTAC  
CTGAAGTCATGCGCGCATCGCAGGTTGCCAGCGACTAAAATTGGCACGTTACGAATT  
CTGGAGATAAAAGCAGACCAGCAATGCATTAACGTGTGCGGTTGCGAGAAAGAGAC  
CTCCTTTCCCGCAACAGTGTGGATGGTCAATATCCGTAAATATAGCCGAGCTTGCGG  
CCACTGATGACCTGAATCCAACGCGACAGCGCTTTGAAAAAATGCTTCATGAAGATT  
TTCCTTGATAGGAGAGAGGACTGGTTACGGAGCATTTCTGCAATTATCGATAACACA  
TTTTCATGTGTTTCGGGTTATGCGCTGCCTGAGTCAAGTCACATAGCGCAAAGAAGTC  
GCGATATACGAAGAACTGTGCGCACCTAGCCTCTGTGCGCAACGCCGCAGTGCAGC  
CGTACCCGCGTGTTATCGTCGAGTTGATTTGCAAGCGAGCGCGATGTGTATGCCTGT  
CACTCACCAGTATGATCGGATGTCCGTGTTTTACGACAGCTTTCATGATCGTTGGCC  
GGCGCAGGCGCTGCAGCGATGCGTGCAAACCCTAGCCGAACTGGCTGATGGACGAA  
CATCACTGGAGTTGGGCATCGGCAGCGGGCGCATCGGACTGCCGTTATCGCAGCGA  
GGCGTGCCGGTGGCTGGTATCGACAACCTACCCGGCGATGCTGGACGCATTGCGTGC

AAAACCCGGTAGCGAGCAGCTGCAACTGGTTTGGCGCCGATTTTGCTGACATGCCGTT  
AACTGGGCCATTTCGGCCTGATCTACGCGGTGGCCTCCTTCGGCTATCTGCTCACCCA  
GGCCGAGCAGTTGCGCTGCATCATCAATGCAACGCGCTGCTTGGCGCCAGATGGCA  
AGCTCGTGATCCAGACTGCAGTGCCCGGCGCCGAAGTGTTTCGACAGCGGCGGAAAG  
GTGAGCCAAGTGATCGACGTGCCGGAGACGCGGGGCACCGGCGCCGCAGTGATGCT  
GGTGTGCTCGCAACCCGACCCAGTGCAACAGCGCCTCGATCAGCGCGTGGTAGTTCT  
GGGCGAGGACGGCACGCGCATCTTCACTGAGCGTCGGCGTTACGTCTGGCCATCGG  
AACTTGATCTGATGGCGCGGATCGCAGGGTTGCGCCTACTGGTGCGGTGGGGGGGC  
TGGGGGCACGAACCCTATGGTGCGCATAGCCGAATCCAGATCTCGGTTTACGTCCCCG  
GCGGGCGCCTCCATGGCCTGAGTCGTCGGTGCTGCTTCGTTGCAAGGCATCATAAAA  
TAGGTCGACAGATAAAGTCCCCAGAGGATTCGTCGCACAAACAGCGGTGATGGGAT  
GGCTTTTGCACACTTCAGCAACGCGTGGTGGCCGAACATAAGCCAACAATCCGCA  
GACGTAAGAAA

>CONTIG\_111\_length\_4532\_cov\_7.045403

TGCCTGCACATCGCTCGACACGCATCGAGATCATCTCGCGTGTATGCGCGCGCACTG  
CGCACTGCCATGCCATGCCATGCCATGCCATGCCATACCGATCATGTGCCCCGCCCGT  
GCGAACAGAACGCACTGCGCCACAACACAGACATACGCCACATCGCACGGTTCGAC  
GGGGGTGCGAAAAAACCCCCCGCACGCGACAACCTCAGCGTGCGTCATGAAGCACA  
TCAGCAACCCAGTCGCGCCCTCTCCATCACCACCGAACCACGCAAAGCAAAAAGCC  
CCTCCAGATTTTCGCCGGAAGGGCTTTTCGCTTGTACTGCAGTAACCTGGTGCGAAGGT  
GGGCAACGAAAAGCCAGATATTCCAATAATTATGCGCGGGGCGTTCTAAAGTTGCC  
CCCAATGTTGCCCCCAGATACCAAGTGTTTTGGCGTCCTTGCTCAGCGTATCGCATG  
GTCTGAGTGCGTAGGCGTTCACGGCTTACGGGGTGATATCCGTGGTTGCTATCCCGC  
TCTGATTTAGTTTTGTGCGGGTTAGGGCCGTGACCGTGAATCGACGCGTCTACGCAT  
GAGGCATGTCAGCGCTTCCGTGCTGTCCTCTTCAGTTTGACTCTGGCTCAGTCCGTAA  
ACCCTGATTTTTGCTTTCAGCTTTGGAGTCTCACAGACAATACGAGTGCATTCTCGG  
ACCTCAACGACGGCGAGGTGAGCATCGTTCCCCCGGCGCGTCCATGCAAGTCGGC  
AAAATACTGGGCGGGCTGGATAGTTGCTGGGACCGGTATTGAGATATCACCACACA  
AGTGGCTCCCGCTATCGGCTGCTTCACGTATGAAGTGATGCCGTCAGCGCCAATGCA  
CTTGTAGAGAGTCGCGGATTGCGCCCAACTCGTGCCAGGGATAGCCAGCGCGGCCC  
AGATGATCCATTTTCATGATATTTCCCTTGATTGGGTTGTACATAGTGCTTGAGGCAA  
ATCTATGCCTTCATGTATTGGCGTAGGTTCTCCAGCGCTCGGGCCTTCCCTCGGTTG  
TTCGTGGACCCGTGCTGCGTCCACCATGGAATCGGCAGCGACGCTTGCCCGGTTTCG  
TCTTCGCCTGACAGGGCTTGCCGTCACGATGACGCCTTGCGCCGCAAGTGACGCTGG  
CTGCATGCCCCGACTCGTACGCGCCCGCGTGCGCGCTTGCGATGTGTGCATTAATTC  
CGGCATGCCCCGTCGAAGTCATGCGCGCGCGCGTACTGGTGCAATTAATCCGGCAGCT  
CCTTCGGAGTCTTGGGCGCTTCTACTTCCTGTTTCTTTATTCCGGTCAGCTTGGCCCA  
CTCGACTAGGATGGCGTCCAGCACCGCGCTATTGGTTGCTTCGATGCTGCCGGGCCC  
GGTGGTAGCCCGCTTGGCGGCGATCACGTCCAGTGCCGCCGAGCTGGGCATGTAGT

CGATCCGCACCATGCGCGCCCGGCGTGACGTTGCTGTGCCGCCAGATGCGCTTTGT  
CCTGGCTCAAGTAGCCCGCCGTCATTGCCAGCACTCTCATGAAGCAGGTCCCCCATA  
CCCAAGAAGCGGGTAACCCCCTTGGTAGAGTCTTAGAAGGTGCCCGATGGTCGGGG  
CACAAACTCCGGTGGAATAAGCCCTGTAGGACCGATGGCCGGGGCACACTGCCCCG  
ATAGCTGTACCTAGCGGCGTACTCACTGACCCGATGACCGGGGCACACTGCCCCAAT  
GGTCGGGGCTGGGCTTTGCGTTTTTCATGCCACCACCCGCAGCGTTGGTTTGCTTGCCTT  
GGATCGCCACAGGTGAGACGGGCACAGCGTTGGGCTTGGCGTCCAGCTTTCGCGCCG  
ACTCCTCGATGCCCATCCAGGTGAAGGCAAACAGTGAACACCAGTGCAGGCCACCT  
TGCCGGGTTTGTTCGATCAATCCGGCTTCCAGCAGTTCTAGCAAGGCGCGGCGCAGG  
GTGTCTTTCGACTTCCAGCCGCGCTTTCGCATCACAGACCATGCTGCGCTCTGGTCGC  
CGTTGTTGTAGCCAGTGAAGTGCAGCGCCCAAATCCAGCAGCAATGCGCGAGCCTTCA  
TCGACAGCCCGCAGAATGCGGCGCTGTTCAACACTTCAACGTTGACCCGGAAGAAT  
GCACCAGACACCTTGCAGCCCCCTTGAACCGCTCACGCGATCTTTGGTTTCATGGGGCGC  
CTTCCTGTACTACCGTAGCGCTTGGGTTGTTGCACGAGCCTGAAATGCTCGCCCCGG  
CGTGTCCTTGTGGCCTTCTGAGGTCTGGGGTCAGCAGGAAGCCCCGTGCATCACGGT  
CCCAACCACGTGCCAGCAATTCCACAAGGGTCAGGCACCGACGTCGTTTGGCTGGG  
TTGTGCAATTTGCCACGCGGTGGCGATCAAAACCACGGACGCTGCCGAAATACTTT  
CCACAGTCCGCACACTGGCAGCGGCTGCCGGTTAGGCGAGGGCGACTCATGCCGCA  
CCATCCAGGGCAGCGCGCGCGGCATCCAAAAGGTCCGCCGCCTCAACGATTCCCGG  
CGAGGGGCTCATCCGTTTGCAGGGCATAGACTTCCAATTGCCGGCGTGCTGCCTCCAT  
CGCGCCCCGCAGCCAGACATATGGCAGCACCTTGGTGTAAGTCTCGTGGTGCCTCAG  
CCCGCCAGCCTGTGCCACGTTGCCCGCCTCGCGCGGGGCTTCGTGCTTTGTGGGGGAA  
GCGCATTACGCCACCTCCTGCTGCATCGAATACTGCGCCACCCGGCTATGCGGGCCGT  
CCTTGGTTCGTCCAGCAGGGGTATCAATCGGGTCACAATGGGGTGCCCCCTCCTGCCGC  
AACTCGAAGATGCGCACGCCGGGCACGAACACGTTTCAGATCGCGGGCGGGCCTCCAA  
TGTGGTCAACGCCCTCTGCCGAAGCGCGGCCAGCAAGCGCGCGCGCTGGGCGGGTG  
CGGAAGTGTCGATGATGTTTGCCTCGGGGCGGCTTTCAGCGGCGGGAGCACAAAGTG  
CTGTTCTGGCTCATCGGGCCACCTCCTTGCCGGTGGCTTCGATCAGCGCGCGAATTT  
CCTCTACTCGCCATGCGGTGCATCGTTGCCGAGCTTGACCGGCTGCGGATACCTGC  
CAGCGCGAACGCCTGCATACCAAGTGGAACGGGAAACCGGGATCAGGGCCGGGAT  
GCCCCGAGTCTTGTTCATCAGCGGCGGCGGCCCCGGCCAACAATCTGGTGAAGTCGCA  
GGAAGCCTGTTTCTGGAAGCTGTTGCATCACGTCGTCCGTTACCGCACCGGGTGGGC  
GGCTTGGGGCTAGTGAATGGTCAAGCTGCCTGGCTCGAATAGGCGCAGTTCACTGCG  
GGCACAGGGTGGCGGGTTCAGTCGAAGTCATTCTTAAATAACTGTTTCCAATAGTTTT  
TTATGGGTGACGGGAACTATTTTCGAGGGCCGGTTGGTAATCCATCTGCGCGCAGGA  
CCGTTGCCATGACTTGCGCGTTCCTCTCAGCTACGCCGCGCGCTTTCACCAATCCTC  
AACATCCTTATTCTTTGGAGCCGTAGTTGCGTCGCTGGGGTCATATAGCGCCAGAA  
CTGTAAAGCTGCTGCCGATAGATTCCGCAACAAATCAGTCTCGTGACTACCCCATGG  
CCAACCGTGGGTAGCGGCGGCGGACCCGCGCGCTGCCTCTTTGCGCTCTCTTACTGC  
TGCTAGCAATGACGACGGGAAAGCATTGAACCTCGTTGCTGCCATTCTGCTGCGAT

GACTGGGGAGTAATGGCGCGCAGTGCCATACATCTGAGTCGCTACATCGGTGTCATC  
TCTGGGAACGAATGCAAGCGTCTGAGAAAGAGTTCCCCTGCGAATGTCGTCAGTAG  
CGCGCAGGATTGCTACGGCCTGTTGGTCGCTACCTGCGACCCTCCCGGGATCGGCTG  
GCATTCCGCGCTCATCTGGCACGAACCCGACGACAGCGCCGCAAACCTCTGCCTCGC  
TCCACAGATCCTTTTTTGGCCAATGTTGCCAGCGTGCTTCGCGCAAGAGATTTGTCTG  
CGATGCGTCCTGTTGTGCTTTGTGCAGGTCGGCGGGCTTTCGACGCTCGACCTGTGCC  
TGAAGCTCCTTCAAGCTCATCGCTTCGTATTGCGCACGCTGCCTGTCCATCGGCGTG  
ACCTCATTGGAGCGTCCTTCCACGGCCAAGTCACGCTTCCACATCGCTCTATCACGC  
ACCGGGGCGGTGTATCCGCCCCGACAGCGTGGTCACAGGAGGCGGGGCCAGTGAGCG  
GAATTGCCTGCGCAATAAAGAGTCGATCAGCTTCTTTCGGTCTGTAATTTTCGGCCAT  
GGCGCACCCCTTGCGCCCCCTGAAAAGTCCCCGCACCAGGCCGGCAGGGTGTCCGGCT  
TTTCGCCCCGTGCGGGCTAGGTGCGGGTTTTTCGGTTGAGATTAGCCCGCCTTGGCTCG  
CAGCGGCACGACGTTGCCGCCCCGCGCGCAGGCCGTCCAGGTAGTCGGCCCCACGCTT  
GCATCATGCGGACGCGCTCGGGCAGGTACTGCGCCGCGTGTGTGTACGCCTCGCGG  
ACCTTGTTCTGTTTCGGCGTGCGGCCAGCTGCCGTTTCGATGGCGTCGGC

>CONTIG\_112\_length\_4523\_cov\_16.380801

AAGCAAAGCAGTGTGTCCTATTCCGAAACCGAGCAACGCCGCGCATTGATGCTGCC  
GCAAGAGTTGAAGGCGATGGGCTTTGACAAGGAAGTCTTCCTCTATGAAGGCATCC  
CAAGCCCCGGTGCTCTGCGAGAAGATCAAGTATTACGAAGATGCCTACTTCACCAAG  
CGCTTGTTGCCGAGGGTGAAGATTGAAGCCTTACAGATGGTCCCTGCATGAGTGATA  
GCAAACCTTCCAATGTGCCTCAGAACCGATTGAAGGCTGATGTCAGTCACAGTCAAC  
AGCTGCTGCGTGATCTGGCATTAAATCAATGCACGCACTGTGCAGCGGTTAGGGCCAT  
TGCAACCAAGTGCATCCGTTGCAACACCTAAGCGTAAGCCCAATCTTCCACGTCCAA  
TTCAACGCCTCAGTCAGGATGCTGCCATGACCCAGAATAACGATATCTCTCCTGATT  
CGATCGGCAAACAGCCGCCAGTGCCACAAGGCTTGCGCGAAAGCTTCAAGGATTAC  
CCCGACTACACTGCTCGGTTGGAAAGGGCGCTCCAACAGTCCGTCGAGAATCCATC  
GCCAATCACCCCTCCCTTGGAGTTTTCGATCTGGGCGATCGAGGGTTGTCTCGATAC  
TTTTATCGACGAGTCACGTGAAAAGCTCAGGGCTGCAGAACAAACGGGCGACCAAG  
AAGCAATCGCACTGGCGAAGGCAACGCATCTACTCATGCTTCATAGCGCTGCTAAG  
GGCACATGGAAAGAGCAAAATTTAATGGACTATTTTGGTTTCCCGAGTTCGAGTCAT  
CGTCATGGCTGATGAAAGCGATGTGCTGGCAAAGGGGGTCCACGAGCAGATCCTAC  
GCGAGCAAATACTAACCGCCCCAGATTTTCATCAATTCGACAACCCAGCAGCAGCCG  
AAAGCAGTCATTCTGGGGGGGCGAGCCTGGTGCGGGTAAGGGCGGTTTGGTGGCTCA  
GGCGAAGGCCGAGCTTGACCAAAATGCGGTACAAATCGACCCCGATGAGTTGCGCC  
GCTACCATCCGCGCGTTGCTGAGTTTCGACGCGAAAATCCTTATGAGTGGTCTGGAC  
GGACTCACAAGGACGCTAGCTCTTGGGCCGATGAGCTGCGCATTGCAGCGACTGCC  
GAGAAGAAGAACCTCATCTTCGACACCACATTGAGTGATGGAAAATGGGCGTCGGA  
AACGTTGATCAAAGGCTTGCAAGAGCAGGGCTATGAGGTCGAGGTGCGTGCTGTGCG  
CTTCTCCCAAGTTGGAAAGTGAGCATGGTGTGCGATGAGCGTTTTACGGCCAACACCG

ACAGGCAAGGCTACGGTCGCCATGTGCCTGAGGGCGCGCGTGATGCAATCTACGGA  
AAGCTCCCTGTCAGTCTGGATACCATCCATGCGAACAGCAACGTGCCCATCCGTATC  
TTCAATCGTGAAGGCATTGAGCTTTACGACAGTCGAACCGATGCACGCATGCCCCGT  
CAAGCGATGGAAGAAGCGCGCAACGCGCGGCTTAAAGATCCCGCTTTCACCGAACG  
TCTTCGAGAGGCTTGGCAAAAACAGGTCGATTGGCACCATGATCTACCGCAACACG  
CGCAAGCGATCCCGAAATCCGATCCTGCTGTCCAAGCAAAATTGCTTGAGGAACAT  
GCCAAGCTCCGGGTGAGCGATGTGGTCGCTAGTCGGATGGAAGGCATCGCCACCAT  
TGATGAACTCGTGCGGCCAGGGGCTCCGCCTGCACGCGTGCCCTGTGCCCCGAGCCGG  
AGATCCCAGGCTTGCCTCGCGCCGGCATGACAGCAGGGCTTGCGGGTTTAGGTGTTG  
CCGCCACTGCCTACGATGCGTCGCAAACCGGAGAGCGTGTTGGCACGCTGTTGGCA  
CAAGACAACCTCACCGCTGCACGCTCAGAAGCGTTGCACTTTGCTGCGCGAGGGCGC  
GGGCGGCTGGGCGGGAGGCGCCGCTGCCGCTGCCGTTGTCGGCACAACCGGTGCAG  
GCCCTGTCGCGTTGGTGGTGGCCGATGGTTATCTGTTCAAGTGCCGCTGCCGACAAGG  
CCGCGACCCTGTGGGACAACCGTCAGATCTATGCGCAGACCGACAAGCAGGGCGTG  
AGCTGGGAGTTCAACGGCAGCCAGTGGCTTCGCCAAGAAAAAGCCGACCTGCAAGA  
CGATGGTGTGGATACGCCAAAGAAGCAGGGCATGTTTCGCGCTGCCCCGAAAAAGCGC  
GCGAGCTGAACTATCAGGCCAGTGGCGAAGCGACCGAGCAGGCGCTTGGCAAGGTG  
CAACCGAGTAATCCCTATGTGCAGCCATCCAGTGAGGCGGATGCTGCGCATCTTTAC  
ACACGGGATTGGCAGCATGATCCGGCAAGTGGCCAGTGGTCACGGATGATCGCCGA  
CGAGGTCGATCGGAACGATCGGCCCATCTGGACGGTGGATCCAGCAAGCCCTGAGC  
GCAATGCCGCGTTGGACCAGCAAGCAGCCCAGGTGGTTGACGCCAACATCGCCCCGA  
GGTCCGGCTGCGATTGCAGCAACCTATCAAGCTGCGTATCAGCGCAATGGTTGGGG  
GGACTTCGGCCCCGTGCCAGCGGCCGTGCAAACAGCCTTGAACCCGGACTCGTTGC  
AAGCCTCGGACGGCAAGCAGTATCAGCGCGATACGCAAGGCCAGTGGCGCCATGAC  
GGCGTTGCTGCCGAAGGCAATGTCCCGTTGGAACCTAACGCAACGCGCGAACGCTT  
GCAACCGGCATTGGAGCAGCACGCGCAGGCATTGGCACAGATGCCCCGCGCGGCAAA  
CGCCAACGCCACAGCAGCAAGACCAGGCCAATACCGAAGCGACCTATGCCGCCTAT  
GGCGTTGCGCCCAATGCCCAGACTGCAGGCGCGATCCAGCTGGCGGTGCAACGGAC  
ACGTGAGGCGAACGGAATCGATGCAGCGACCAGCTCTTTGGCATTGGAGCGTGATG  
CGACCGGCCAATATTCGGTAGACAGCCCCATCCAGCATCTGAGCCGTGGTGCTGATG  
GTCTGGTGC GCGTCGCAGCAACCACCAGCACTGATGAGATCCATCAGGCGCTTGGC  
GAAGTGCAATCGCTTCGGCAGGAGCAACCGCCTTCTGCCGGTGCAACGGAGCTGCG  
TATTGACGCGCAGTCGCCCCAAGAGCGCGATGCCTACGAGCAAGCGTTGCGGGAGG  
CCAATCGGCAGGGCGTTTCCACGCAAGAAGCACAACAAGTCGCAAGCTTCGCAGCA  
ACGACCGTCACCGCTGCGCATGTGGATGAAACCCAAGCGCCTCAGGCAGCCATTGA  
TGCGCAGCGGGATCGAGACGTTGCACGCACACCCGACGCGCCTGCCGTTGCGGAGA  
CGGCAACGCCTGCTCCGGTCGTGATGCCTGAATCCGTCAGCGCGCCGCTGCCCGAAG  
ACGTGCGCCCCGGTCGCCAAGCCTGCCGAACCGAAGCCCGAACCTGTCCAACAACGC  
AAACCACAAGAGACCCAAGCGCCTGAGGTTGCCGCACCCCCGACAGCCGGCGCAGT  
CCAGCCTAAGGCGGAGGCATGGGTTCCAACGGCGGCGAGCGCGTCTGCGCCGAGTG

CCGGGCCCCGCATCATCCGCTTCGACCTCTGCCGATCAAGCGCCTACTCAGGCCACTG  
TGCCGACGCAGCCGCCGGCATCAAGTGAGGTGGAAGGGCTGCGCCTCGGGCACC  
GGCAGGAGGTTCGAGTTCTTGCAGTATCGCTTGCAGCAAATAGATGCCCCGGGTCC  
AAACGGTCAGGCCGTGCCGCAAGACGGGCACTATGGTCCAGAGACCGAACATGCCG  
TGAGGCAGTTCCAGCAAGACCAAGGGTTGCCGGCAACAGGCGTTGCCGGCCAAGAC  
CTGGATGCGGCGTTGTCCAGGCACAAAGCGCGCGCCGAGATGCCTTGAAACCCGC  
AGCGCCGACACTGGCAAATGGGCCGGTGGAGCAGGGCAGTGAGCAGCAAGCCCGA  
GTAGGCACGCCACAGAACGATGCGCCATCGGCTGTTCCATTGCAGGCAGAGCAGCA  
AGAGGCGGTGCGAGCGCCGTGCGCCGCAATTCCAACGCAGAGCGAAGTGCCGGCAC  
AGATCGTCTTGCCGGAGCGCCAACCCGCTGCCTATGCGTCATCGCCAGGTTTGGGTG  
GGACAACCTGCCCGCTCTAACGCACACGAACACAATGAGGATCGGGTCGAGCAAGCA  
AGGCCCTTCCAAGATGCCGCTCAGCAGGCGTTTTCTCTGATCATCGGGATTATGCG  
TTGTTCTCCGCCATCCAGGCGCAGCTCCCGAAAGGCACCTCCGATGAGAAGACCGCT  
GAGGTATTGCATGCCGTCAAAGAGTCAGGGATCGAACGTGCGGCTGAACTCCGCAA  
AGTGATCGTCCAAGATGATGTCGCCTTTGTCTTTGGCAAACGCCCGGCTTTCTACTC  
GGAAACCCCGCTCAACACGCCGTGCGCCGGCATCAATGAGACCTTGAGAAAGACAG  
AGGCATTGGATCAGCAGCGGGTGAGGAGATGGTGCAGTTCCAGCGCGAACGCGAA  
GAAATCGACAAGAACCCGACAGG

>CONTIG\_113\_length\_4516\_cov\_6.241513

GAACCTGCGCTACGCCAAGAGCGACGGCACCTGGCGGGCCTACGCCAAATGAAGAC  
CTAACCCGATCCGATGGTGGAACGTCAGCCGGCACTGCGGGCGGCTTCCTCGAAG  
ACGGCGCCATGCGCGCTGCCCCTAAAAAGGTGACCACCCCGCACAACCGATTCTTCT  
GGTGGTTCTCGCTCAGCCTGCTCTTCCTGGGTCCGTTTCGGCTTCATCATCGGACCGCT  
GATGGCTCGGCGAGGTTTGCGAAAAGCAGAGCGCCTCTACGTTTTCGAGGCTCACAT  
GGCCCGCCAGCGCGATCGTGGCTTCAGCTGGTGGCAGTGGTGGGTCATGACGCCGC  
TGACCGTGATGGGAGTTTTTTGGGTACCTCGGTGCTGAGCGGGCTGCCCATGTTTCT  
GCTCCTGCTTTGGGTGACCTCAGCACATGAGGGGTCGTGTAAAACGACGAAACAG  
CTCCGCTTGGCTCGAGCGGCGGTTGCTCGCTATGACTCTTCGCGATACGTGAGAAAT  
GCCTTCCAATCCATTTGCGCTCCATGCAGCCGCCGATATCTCCACGGTAAGCTAGGA  
TCCAATCAGGATGATTGACGCTTAGGAACCAACCCCGCATGACGCTGCCCTCCATCC  
CTCGTTGAAAGCCCTGATTCCGGAATGCAAGGAATGGCTTGAGCGTGCTCAAACATC  
GGGCGATATCGATCGTTACACCAGTGCTCTGGAAGAACATCTTAAAGCCACCGGAA  
CGCTGAGTCCGAAGGCCGGCACGCAACTTGGGCGAATCAGCCACTTTTGGAGCATT  
GCGGCTTGCGATGCTTACTTTTCGTTCCGACGTGGCCGAGCTTTCCAGTTTCTCCACT  
GGACCATCGAAAGCCGCGCCTTGCTGCTCCGCTGGGATGCGGTGCATAGCCAAATG  
CACGCGCAGCTTGGCAATTGGCCAGCAGAGTATTCCGACAGTCTGCGCGCGGCGGG  
TCCTACGGCTTTGTCTATTGGGACACCGGCAACATCTGCACGCAGCGTTTTCTAGA  
AATGGCCGAAAAGGACGAGAGGCTCAACACGTTGCCTCAGTCCCGGCGCATCGCTC  
ACAACACCCACGACGTGTTTTTGATTGCCTTGCTTCCGAAGCCTATGGCCTCTCCAC

CACCTTTGAGCCACGCAAACCGTTGATCGCGGCATATCAAGGTGTCTTAGACAGCTG  
GAAGACCGACGACAAAGACACCTTTGCGCGAGAAATGAATCAGGCCGCTGAATTCC  
ATCTCAGCCGAAGCAAAGCCAGCACTGGCGCTAAGTCCTATGAATTCGACCGCGAC  
TTTGACCGCGTCTTCCCGGTCGAGTTGTTGGCCGTTCAAGCACTTAGGCGTCGCGAT  
CATCTTTCAGATTTTACATGCGGCCACGCGCTGATTGATGGGCCATGGTCTGTAGTG  
CGTGACATCGCTCCTGCTTCGCCCCACCCCCTCATCGCTGCCGTCTTGACGCGCGTG  
AAAGAGGACTACCCGCTGTTCCGTTGACCGACCGATTGAAAGGATTCATCCATGAAC  
GATCCGGCGCGCACCAACACGTAGTTCCGACATCGCGGCAATGGCTATGGCGACCGA  
TGCCAATGGCCACGTGGACCTCACCGCCCTTGAGGCCCATCGCCTCATCTTGAATCA  
CCAAACCATCCAGGGACTTGATGCCCCCGGACTGATCAATGACATTGTTGATCGCC  
CGCCTACGCCAACCCGCAGGGGCGTGAACAGGTTGGCACGCTGATCCAAGCAATCT  
CCAGTCGCCTTCCACCTGCCGATGCAATGCGTTTGGAAGCAGCGCGTGATTCGGCCA  
ATGTCAACGAATCAATGCTGGAACGGATCTCCGAGCGTTTCATTGAGGAGCCGGCG  
GCTGCGGCTTGGAAGCAGGTTGAGACAAGCGGCGGCGCTGCGCTGCGTTGGACCGA  
TACCCAGATCAGCGACAGCCTGGCCGCATCGCGGAACCTGGGCTCAAGACGTTTCGCA  
ACAACCCACAAAACAGCTACCTAGAACGTGCCGCCGGCACCCTTTCAGCCGGTCTG  
GCTGAGACTGGACAGGACAGCTATGGCGCGATGAAGGGGGCCACAAGCCACGGCCT  
CAATATGCTGGGCGATACGGTCGATTTGGCCAAGTTTGCCCATCAGTTCAGCACCGA  
TGAGAACTTTCGAAACCTGGTCATTGGTGCGGCCGCGGTCTATGCCTCACAAGCGGT  
CGAAGACCCCGGGAAGGTGCCGCGTGACATCCGCAACGCCGCGAGTGGGGGCTTGGA  
ACGAATGGGAGAAGGGATTTGAACAAGCGACTCGAGATGGCAAGCAACAAGAATA  
CTTAGGCGAAGCAAAAGGCGCGGCCGCCGTTGAAATCATCGCAACGTTTCGTGCCCG  
CGTCCAAGCTCACCAAGCTTGGAAGGTAGCCGAGGCCGCCAACGCAGCCGAAGAG  
TTGGCACCTCCCGCTGGACGCATTGCCGGCAGAGCTGAGCGTCACGTTGCGGGCGA  
GCTTTCGCAGGAAGTCTCGAGTTGGCCACGACGCCAGGCAGGTCCAAGCAAAGG  
GGGGAATGGAAGCCAAGGGCGCCGACCTGATGTTTAGCGGCCTGGTAGGCGTTAA  
CGCAGCCAGGGTGAGCTTGGAAGAATTGGTGGAGGGACTACGGAAATCAGGCCATCT  
CGATGGCTTACTCGAAAGCGGAGCACTGACGCCAAAGGAACTGGGCTACCTAGCCC  
GCCAAGACGTCACCATGTTGATGGCTCGGTGCCTTTCGATAGAGCGATCACGAAGT  
CCGTGCGGGGGCCGAGAACTCTCAGCCTTGACCAGAGCCGAGACGGGTGACATCGGC  
GAGGCCATTGTCTCGCACCAACTCGCCAAGGAGGGATATCGCGATTTGGTGCCCATC  
CAAAACAACCTCTGGCCACGGCAACGATTTGGTTCGGCTTCAATCCCGACAAAGGCCG  
ATGGGAGGTTTTTCGAGGTCAAAGCGTCGGTCATCGGCGCGGCGAAAGACCAAACCG  
GTGATCCACAACGGCTGGTCACCTCGCGCCTTGAGAAGGCGATTGAAGCCCGAGGC  
CATTGGGACCCCAAGAACATGTGGGAGGAGCAAGCCAAGGCAACTGCCGAACGGCT  
CATCGACGACCACTTCGACGAAGCCACACGTCACCTTGATGTTGATTCGAAATGGGT  
TCGCGTCAATCTGGAAAAGGATCCGGCTACGGGGCACATTGGTGGCAAGCTGCTGA  
TTGAACCTTGGAAGCGCCTGCGGATCGTGCGTTGGAACGCGCCAACAACCCCGCTC  
CGACCGCACCGGCCAAGACGCCAGCGCATCCCGATCACCCGGACCACGCGATGCAC  
GAGCAAATCAAAGGCAAAGTGACCGAGCTTGGAACGGCAAGCGGGCGTTCCGGATGA

GATAAACCAGCAGACCAGCGCCAGCCTTTTGGCCCTAGCTAAGGAAAATGGTCTAA  
CGCGCGTGGACCACGTGCTTCTTAGCAATCAAACAGCCACGGTAGAAGCTGCACAT  
TCCATCATCGTGGTTCAAGGCAACTTGGGCGACCCCGCTGCCTTGCGTGCTGCCATG  
CCAACCGTGCAAGCCGCCCATGCCCACGTTGAGCAATCGTTCGCCCAGTTAGAACA  
GACCAACCAACGCTTGGCGCAGAGTCAGGCTCAGCAACAAGCGGTGGAACAGACGC  
AAAGCCAGAACACGCCTCAGATGCGGATGACCTGATCGCGAACGAGGCTGTAGGGA  
GTGATGAGGCTGCCAACCGTCATGGCAGCCTTGGTCACGAATCGCTGGCGATACTGC  
GAGTGCTGTAAGTGCAACTACTGATTGACCATGCTTAGCAGTCGCATCAAGAAAGCT  
CGGATATTCCGGGCTTTTTTTGACTGTCCCGTTCAAACGCAGCAGCAGATGAAGTTT  
ACGAAGCTGAAATTTTTAGCACTTGGTCACAGCTTGGAAAACCCAGAATTGACGGTC  
GAGTTCGCCTGTTAGATACCTGTGATGACCGTGCCTACATCATAGCGACAGGGGCG  
CGGCGCAACCCCACTCGCCCACTGGGCTGTCCTGAGCTGTCTGCTTCAACTCC  
GTCAATTGCGCGCTCCTTCAACAGGCACCGGCCTTGTCCGGTGTTTGGAGGGTTCGT  
GCGTCCCCCAAAAACACAAGGAGATGTGCTGCTATGCGATTCCGATTCTTCCTCACC  
GCCTTGCTGCTCACCACGTTCAGTGCGGCTGCCAGGCCAGGTGGTCACGCTCAAC  
AAGGGTGGCTACACCTTGAGCTACGACTGCACGAACCGCACCGCGCTGCGTTACGA  
ATACGTGCTGCAGGCGGACAACGGCTCGGCGGCTCGGCCGTCCAGCTTCAACCTGG  
ATACCGAGCTGCCAGCGGCTGCGTCGGCCAGACGTCCAGCGCCTCCTATGCCAGC  
GTGCGTTCGGGCTACGACCGTGGCCACTTGGTGACATCCAACCACATGGACTACAAC  
GCCACCTACATCCGCCGCGCCACCCTGATGTCCAACATCGTTCCCCAGGTGGC

>CONTIG\_114\_length\_4496\_cov\_81.240558

TGCCACGAGGTCCGGGTCTGCAATGAAGGGCTGGCTGCGTTCGGCCAGCCCTTCATT  
GCAAACCCGGACCTCGTGGCACGCCTGCAGACAGGTACCTCGCTCGCGTCTCCGGAT  
CGCGACACTTACTACGGCGGTGGTGCGGAGGGTTACACCAACTATGCGGCCGCAAC  
CTGAAGCACAAGCATCCACCTCTTCGATGCATCCGCCGGCGGCTGGCGCTGCGCTCT  
GCGAATTGCGCTCAAAGGGAATATCGCAGCGCGCATCGGCATGATCCTGCGTCAGG  
CTGCACAGCGTGTGGCGATCTATTCCATTAACGAGTCGTCCCCTGACCTGGCGGCGC  
GCGTGATCGCCGGCAACTCGCAATCGACCTGCGCGAGCGCGTCCACAAACAGTGGA  
CAACGCGGGCAACAAACACTGCGGGGCACGTGACACCGGCAACGCTAGGCAGCTAT  
GACCATGCGCTGCCGATGATAAACTGCCAAAGCGCGGCTAATTTTCCAACAATTTT  
TTCCAAGGCAACGAAAAAGGCACTTCGACTCGCGTCAAGTGCCTTTTTTATTGGTGG  
GCCCACCAGGATTTCGAACCTGGAACCAAAGGATTATGAGTTTGTGCTCAACGCGCC  
ATGCCTAGGAAAATCAGACGTAAGGCAACGTAAGCAATAGAACAGAAAAGTAAGC  
TGCGACAGCAGTTTAGCGCAACTTGGCGAAGACGGACAAAACACTCAGCTCTGTACCG  
CTGGAGTACCGCTATCGGAAACAATTTGAATCCGTAGGCGTTTATGGCGACTGCTCC  
CATCATGCCGCCAGCCAGGCCAGCCAAGAAGCCGGCCCGCACGGCGACGGTAAGCC  
ACCGCCGCAAAGGTCTGCGAGAGCGATCGGGCGCAGCTGAAATTGACCGGCCCGCC  
ACGCGTCTGTAACCCGCCCCGCCCCGAGCGGCGTCAACGCCTACCATTGCGACCAACC  
ACCCACCAAGCACCATACGCTATGACGCAGAACCGCTACGGAATCAGACTCAA

CAACGCGCCAAAACCCCTGCGGGTGGATGCGCTACCGCGCGCAGAAGGCCGCCACC  
CAGACGACATGGAGGCAGGCAATGGCGATGGCTTCGCCTGGACCGCATCACGCAAG  
TGATGGCAGAGCTTGCGGCCGGCGAACCCGCCGACTAGAGCGCGCAATACATGCTC  
ACGATCGCGGCCGATGGTCAGTAATATCACCCACGTAGCTGCTGCTTAACGGCGAC  
GACCTCGACGGTGCCGAGCTGTACGTCATGGAGCATGTGAATCGCGCGCTCCTGGTT  
TTTGCCGAAGGCCATAAGGACTAATCAATGCCAATCCAACCCAATGCGTTTGTACC  
TCCCGCGTGACCGATCTCCCGAGGGGTTTCACTTTCACGACCGGGCGGCAATTGGTTC  
GTCCATGCACACATCGCAGAGCAACGCGGAATGCCACCACAGAGCGCCGCTGTGGC  
CCTGACGTTCAAAGGAATTACTACGTTTGTTCAGGTCAGAAGCGTGTCTCGCCCTTGC  
TCCGGGGCTCAAAGCCGACTTTCGGGTCATCGGTCCGATCCTAGGGCCGAGCACGCC  
CCCGCCGAGCGCGCTTACCTGGTCGCGGACCAACACGCCCCTCATCGCTGCTACCGA  
AACGTTTCGTCACGCTCGCCGGCATCGAAGAGGGCGATGTCATCAAAGACGCGTCGT  
TCTATGCCCCCATTTGGGGGGTCTGGGTGATCGATGCCGCCGGCAACCAGGTCGGG  
GACGCGCCGTTGTTTGTGTTAACGCCGACGCTCGAAAGACGCAGGCACGCCATG  
ACCAAGCGCCCCGCCCCGTGCGCCGGCGCTGCCCTCCCCGCTCTGCTGGCGGCTTGC  
GTTGCGGCCGGTGCCGTTGCAGCGCCGCCAAACGGTGGCAGTTGGGCCACAGTCGC  
CGGCTATCACCCCGGCATGGGGAAAGAAGCCGCACGCAAGGTGGGCCTCGCAGACT  
GCAAAGCCACCTACGAAGCGGTCGAGTGCAAAGCACCCAACCCACTCAGGTTCCGCC  
GTGGCTGTATCCATCGACAGCGGCATCACCTCAACGAAAAAACGGGGCGTATCGA  
AACGGTAGAGTTCCAGTTCCCGAAAGAGGCGTATCCAACGGTTGCCGCCGCGCTTGT  
CGCACAGCTCGGAGAACCCACGGCAACCGATGGCGATTACAGGGCTGATGAGTGGC  
GCAGAGCTGGGCGCGGCTCCTGCGATCCCGTCCTTGTCTGGCAACGCGGAGGCGAC  
GACGTTGTAGCAGTGTGCGGCGGCGGTTGGCACCGCAACGGCCGCACCCACTTGGT  
CGCCGACCGCAAGGCTGGACGCGGCAAAGAATGGGCCGAGAATGTGGCCGCGCGT  
GCAAAGAGCCGTCGAGCGGCCGACGCGTCCCAATCGAAATAGGCGTAATTTCCCGT  
GCCGGGGAAAGATCTACCGTTTCAGGTTTCGTAATCGGCGCGGGAATTTTTTACCCGA  
TTCACGTGTTTCGGCTATGAAGCAATCATCCGACGAAATGACGGGATGGCAGACAG  
GGAGATAGGTGTTATAGATGTCAATTCAGGGCGGAAGCTCGGAATAGCTCACTCAC  
GTCGGGCGGACATCTCGCCAGCCGTAGGCGAAGTCTCAGCTTTGTTGCTCCGCAGGT  
CCCGTTGAGGCAGGCCTTGATAAGGCGCTCACCCACACCGCCTGCTGCTCATCAAAG  
GCTTTGTCTAGACGTATGCGCTCTGAGAGCTTTTCCTTGAGCCATGTCACTGTGCTGC  
TTTCCGAATCAATCATTGCATCAAGGCCTACGTGAGTACGCAGCTCCATGGAAGTGG  
CAGCTGCATGTAGGCCAAGCTTTGCGTATTTCTCTGGCGGTCAGCAAAAATACCGAT  
CATCATCCCCGTTATCCGCCATGAAATTGAGATATCGCTGAATGTTTTCTAGTTTGCG  
TGGGACAGAATGCACCTGATCAAGAAGCGCTCCGGGAAGAGCCATCCAAACAACCTT  
CAACGTTTGCATAATCTAGCGAGGGGGGAACGACCTGAATGGCGAGCTCTCCATCT  
GGGCCCACTTGACCGCGACAGGTGCCATCGTCGCCCGCGACATCCGCACATTCCGCA  
GTGAACCTCTCCAAAATTCCTGAGATTGTTACAGCCAAATAGAGTGCATCGGCAGAG  
CGCCTCTGCTCGCGAGCTAACTGCTCTCTACTAGCGACAAGGTGTGCGCCGATCCAC  
ACGCCCCCTAAGGAACCTGCGAGCGTCCCAGCCACCTGGAGCAGAGATCCCCACCA

GGGGGCCGAAGTCTGGCTACTTGTGCAGCGGTGCTGGCAGCTGCCAGCAAGGTGA  
CCTGGACCATAGCGATGTCGTATTTCCCTATTTGATGGAAGATAGAAGCCCACCGGA  
CTTCGTAGAGTCAAGCGCCGCAGTCCTGAGATCCCCAACAGAGCGCCCCCGGCCGC  
GCGCAAGCGCCGTGAGCCTTCGCACTTCATCAGGTAACGCGGGTTACCAGACGGCG  
AAAATACTTCATTATCAAGAAGCTACGTTTGGGACCCGCGTCCGAGCCGCCGGCGTA  
CATGCCGAAATGTCGGTAACGGGGCGCCCCGGGATGAGTCTCCATCGCGCCATCCCT  
AGTCCCCTGCTTCACAGACAGGCCGCCCGTTGCCATAGAATCCCTGAGACCAAAGG  
AATCAGCTGCGATCTGCGGCGCACCCGTCCACGATGGAAATCACCATGAACGATGA  
GGCAGCAATCCCCGTCACTGTCGCGAGCGACTCCCATCTGGGGGAATTTTTTGTCT  
CCGGCCAAGCTTCCGGGGCAATGGTCAGAGCGCTGGCTTGAAGATTGCCAACGAAG  
ACCTACTTCTGCCCCCTGGCATGAACACCATGGATCCACCCAATGGTGATCCAAGCC  
AGTATCCGGTGAGGCCACACCTAGTGCAGGTGCCGGGACAGCAAGAGATGCCGCGT  
GATTTGAGAAGCTAGCGGGCATCTGGATCGTTTCGGAAGCATTGAAGCAGGTGTTT  
GACGCCGTGATCCGGAGGGCTTCGCCTTTGCGGCCTGCGACTTCACCCTTGCCGAC  
GGCACCCAGGGTCTCTAGTACTACCTCTGCAGCGTGACGCGTTGGCTTGATGCGCTT  
GATGAGGGTGAATCGCGGGTCCAGATCGAGATCGAACACGATTACGAGACCGGAGA  
AGACCTCAACTTCTATAGCGTATCCGGCGGTGCAAGCCTCGTATTCAAGCGGGAAGT  
CGTTGGTAACGCCACATCTTCCGACAATCACGCCTAGGAACCGAGGCCATTTGTGA  
CCGCGTTTTTGTTCGACGCCTTGAGCGCAACCCAACCTTAGCGGCCCTTCGCTGCGAGA  
CGCCGCAGACCTCTGACGCGTCAAACCCTCGATACGGATTTCTGAGCGGGAGTTGCA  
CCGATGGCTGACACACCGGCTTTCCAAGGGCATCATGTCATTGAGCAAGCGGCTTTC  
AGTGAGAGCCGATTGCTGCAGTCGCTTTCCAGAA

>CONTIG\_115\_length\_4479\_cov\_110.660616

GTGTGTAGACCGTATGCCAGTTGCCAAAGCGCTTGGGTAGGCCGCGCCATTTGCAGC  
CATGCTCGGCAACGTAAAGGATGGCGTTGACCACTTGCAGGTTGGTCATGCTGACAT  
TGCCGCGCTGCGCGGGCAGGCAGTGTTGATCAGAGAAAATTGTGCTGGCGTGATCT  
CCATGCTCAATAGTTTAATCGCTCGGGCCATTAGTGTTAACAGGCCCTAGATCAGCT  
CAGGGCGGCTTAGATAGGGAACCGCGGCAGATCGTCCAGGATGGACTGCGCCGTTG  
CACGGGGTGACAACGCGAGATAGGTCTGATCGACTGCTTTCTGCGACATGCCTCCAC  
GGATGAGTGAAGTCAGGAGCCCCGACTTGTAGGCCTTCTCAACGTTTCGCGCCTTCAA  
AAGAACCCATATGGGCATAGAACCGCATAGCGGAGCCACGCAACACATACTCAATC  
AGGAACTTGAGCACAGTCGCTTCGTAAAGCGGCTGATAGAGCCGATCGCTCCGCGT  
AGTGCGTTTCACTGCAATTGCCATCAGAAAGCCACTGCTGTCTACCTGCCCTTCGAG  
CAAGGCGTGTGCATCCTCGAGGGCAGCAAGGTTTCGCGCTGTTTAGGTTAGGCACGTC  
CTCCAGGAATATCTCCAGGCCTGGAGGAAGGGGATGAGGTAGGCGGAGCGCCACGA  
TGTCGGGCGAAGACAAACCCAGAGTCATGTCTGCCATCTCCATTGAGTGCTCGAAAG  
CCTGGATAGTGGCGCGCACATCTGGCCTAAAAAGCTTTGTTGCGTTGTACCCCCGTG  
GCAGCTTGACGATCGCGACCTTTTCGAGCGGGCGTCGCAACGGATGCGACAGGCTGC  
GTGAATGATTGCGAAGTCCAGAGGCCAGTGTCCATGAACCTATTCCAAGCCGCAGC

AGCGTTCCACAATGCAGCTGCTTCCAGCAGCTCAAAAACGTCGCCCTCAACCTTGTT  
GACGGCATTCCCCTCGAACTTGAAACCCGCTCCAAAGTTCGCGACGCCCGCGTTAAA  
GGAGTTCTTTTCGGAGCTGGCCAAGATATTCGTTGAAGGTCCGGTCCGGGGCCGGGTC  
GTTCGCGCAACCAGGGACGAAGGAGTCGAACGTACAGGCCGTGATGGTGGCCTGCC  
GCAAACGGAAGTCCGTACTTCGCCCCCTGACCCTGTTAGTGCGTCGATCCTCGATGC  
ATACGCCGTAAGGACAGTTGGCACAGTCGATTTGTAGATCAGGGGCGAACGGCATC  
CGGCCTTTCCGTGGCTGTTGCACATTGACGTGCTGTGGCGAATAGAACATCTAGGTC  
AGAGCCGAGGGCGTCTGCAAGTTTCTGCATGACCTGGAGCGTTGGATTTTGAACGCC  
TCGCTCGACCCCACTGATGTAGGTGCGGTCCAACCCTGAACGGTCAGCCAAGTCCTC  
TTGGCTGAGTCGTAGCAATTCTCTCTGGCGCCGAACGGCGGCGCCGAAGTTGGCGGC  
AAGATCCATGTCTCGCAGCGTATTTGCCTGTGGACGAAGAGACTACGGACTATGAGT  
CACAACACTGCATGTAGTGCTAGATAGTGCTAGGTGCCCCAGCAACTTGAAGTCTGA  
CGGCAGCCAAGATAGGCTCTCATGCAGATTGAAAGTCACATTTAAACGCCGGTGGA  
GCCGCGATGAAGAAGACGACCATGCCGACAGCCCTCTCCCTGTTTTTCGGGCTGCGGT  
GGGTTCTGTGAGGGGATGAAAACAGCGGGATTTCGATATCCGGGCAGCAGTGGAGAT  
GGATCGCTATGCCTGTGAGACCTATCGCCACAATTTTCCGTCCACCCCTTGATTGA  
AGGGGACGTACACGAGTTCTTGAAGCCTCGTTCAAGCGACTTGAAGAAGTACCGTTT  
AAACGACGTTGATGTGGTGTGGAGGACCGCCGTGCCAGGGCTATAGCCAGATCG  
GCACGCGCCGCCTGGATGACGAGCGTAACGAGCTCTATCTCCAGTACACACGAATC  
GTCGAAAAGCTGCGCCCGCGCGTCTTCTTGATGGAAAACGTGCCGAACATGGTGCTC  
CTCAACAAGGGGCATTTCCGCAAGCTGATTACCGAGAAGTTTCGCCTCAATCGGCTAC  
AGCAACGTGGTGGTGTCTCCGCGTGTGAGCAGCCGACTACGGCGTGCCTCAGCTTCGC  
CAGCGAGTGATCTTTGTTGGCACCCGTGACGAAGATGCGTTCTCGTTTCGACATGGAG  
AGCTTCTGCAACGCCGTTCTCGATAGTTTAAAGGTTTCGAAAGCATGTGACTGTCCGC  
GAGGCACTGGATGACCTGCCGAGCGAGGTGGTACACAGCGGCGAGGTGATGAGCTA  
CCCCGCCGTAGATGCGCCTTCACGCTTCAGAAAATGATGAGGCTGGATCACGGACT  
TGCTCAGTACAGTAAAGCCACCAAGCGCCAGCGGGGGCTGGGCCCAGGCGAGGCTG  
TTCTGCACAACCACACGAAGGAAATACAAGCGCGCCGTGCCAATCTAATATCC  
CTCTTGGAAGCTGGAAAGAAGGCTGACAGCCTTCCAAAGGAGATATGGGACGGGAA  
GCGTCCAGAGAAGTGGCGCCGCCTGCATCCTGATGAGCCCTCCTATACGATCCTCGC  
CCACATGCACCGCGATCTGAGCGAATGGGTGCACCCATACTTGAATCGTTGGATTAC  
TGTGCGTGAAGCCGCTCGCCTCCAATCCTTCCACGACGGGTTTCGTCTTCCAAGGAAG  
TGAGTGGCAGCAGCTGAAGCAGATCGGAAACGCAGTGCCTCCGTTGATGGGTCATG  
CCCTGGGCGTGCTGGCTCAAGAAGTTCTAAAGGCGCTGGACGAAGGAGATGCGTAC  
GACGGAATTGCATCGGAAATGCTGCAGTTGGTTGCAGCCTAAAGCTCAGATAGAAC  
TCATTAAGAAGGAGCCCGGCGAGAGGCGGGTTCCTTCAGCACCTCAAATTTTCTCT  
TGAACAGAGGATGAGCCGGATTACATCATTCGTGGCCCGCCTTTGCTTGGATCATCC  
TGACTGTGGTCACGCGCCTGTGCGAGCTCTTGCAAACGCGTTTGCTCTTGAGTGTCC  
CGTGCCTGGTTTGCCGCCAGGTACTGTTGCTCGGGAGCCGCCGCCAGTGCCTCGCTG  
GTCGGCATGTGAGCGCGGTTGGCATAACGGATCCGGGGACGCTCCTGGGCCTGAGCG

CATCACGAACATCGTCACCCCGCCTGGAAGCTTGTCGGTCGGTACGTTTCAGTGCGAC  
ATCGACCTTGTGCGCCGGGCTTGAATCCCGCCTCCACGGCCATTTTGTAGGCGCTCGC  
AACCATGCGATCGCTGCGCTCATCCCAGGGCTTGTTGGCGCTTTCATCGAGCCTTGC  
GATGGAAGAGCGTAGCTGCTCCACCAATGCAGCATCTTGCGGGCTTCGGGCCGGCGG  
CGCTCTGATGATTCACAGATGGCTGCTCGTCTTCACGAGGGTCTTGCGATGCAACAG  
AACGCGCACCCATCTGCATTCCCGGCGCGCTGGCCTGTGCTGTGGTTCGTGCCCCGTGG  
ACGCTGCACGCCCTTGACGTGGTCGTCATCCAGCGCAGATGAACGTCCCGGCGCTG  
TCTGCGACGACGGCGCGCTGGGCACGGGGATTGCGTAGGCGGGGCTGCAGGCTGT  
TGCGTCTGAGGCGACTGCGCAGGGGGATTGGGCGAGGTGGCGTTGGCAGGCATGGC  
TTGCTGCCGTTCTGCCTGCAATATCTCTGCTGCCGTCGTGGTCGTCCTGATCTCCATG  
CGGTTCGTGTTCTGGCCAACCACCGTTGCAATTGAGCCATCTTCTGCAGCTGCAGG  
AAGAAGGGCATCTGCTTGCCCGTATCGCGCACATGGTCTTGTGCAACTGCCGCCGTG  
GCTGCATCGATCTGCGCATCAGTGCGCGTAATGCCAGCGCGGGCGTACATCCCGGCC  
ACCTGGCTGTGCAAGTCGCTCTGCGTCGGCGTGGGATTGCTACGGGCGACCTCCGCC  
ATCGACGCCATGTCTTGAAGCCCGGCCTGTTGGCTCTGCCACGTACGGTTCAATTCC  
TCGCGCGTGTTGCCGGTGGCCGCATTGGTGCCGTAGAACGCGCCGGGCGTGGTCCAT  
TCGCCGCTGGCGTCGCGGGTGTAAGAGTTACCGTCAGAAGCCTGTAAGGGCTGCGG  
TTGCGTGCGCGCGTTTCGTGATGGCCTGCGGCACCGGTTTCGCGGTTGGTGAACCTATT  
CCAGCCGAACCTGGTTGTAGGCGATCTGGTAGCGGGCTGCAGTTGCTTCCGGCGTATT  
GGCCGCGTTCTGCGCAATGATTGTCTGCGACTGCTGCTCCAAGCCACTCGCACGCTC  
CGCACTGACCGACGCGTTACGCGTGATTGGTATCTTGCCGTCAATATTTCCCTGATT  
TCAAGCTGCCACTTCCCCGTCTGCGCATCGCGCACATAGTCGCGGCCCCGTTTCAAAC  
GGTTCGCGCGGCGGATGCGTTTTCGTTCTTGGCATCCAGGCGGTATGGATCCTGCG

>CONTIG\_116\_length\_4457\_cov\_7.308545

CGAGAGGGGTGGTGCAGCGCGTGCGTGAAGGGATGCAGTCAGGGCGCTATCCGGGT  
GCCCCGAAAGATCGATGGATTAATCCAAATGCCGCTCGAAGCCTTGGCTGAGATCTTG  
GATCCAGCGCCGACACCTCAGCCGGTCACCCCGCCATCACCTCTTCATCCTCGCGA  
CGCCGATCGGCGATAGGGCCGCGTCTAGGCTTTGTGCGTGCTGCTACCTTCTGGGAG  
CAAGTGATGGGGGCCCTTGCGGAGCAGGAATTGGCAGGCGAGCTGGGTGAAGTGGC  
TGCAATGATGTTGCAGGACCTTCGCTACGAGGAAGCCAAAGCTAGAGCTGAGCAGG  
CGCGAAATGAACTGCATTCAAATTCTGGACAATAGTTATGGGGAATTTGTGCCATGG  
TCACCGCAGGGTATGCTGCTTGAAGCCCTTGCAACAGCGGTAGTGGGCTCAGGCGC  
CAAAGTATTGTCTCGACTCTTTCATCGATGGGACAAATTGCTCAGTCCCCCGCGAT  
GAATTCACGATAATTAGCAGGGTTCGGAAATGCCTCAGGTTTCGCTGTCGCAGCAGT  
TTTCACTCAATGCTATTGAAGGAGTCCTGCGCGAAGTGCGGGCATCACCCGGACAAG  
ATCTGCCCGTCACAAAAGACTATGCTTCTAAGCGCCATGGGCCGCTTCGAGATGCTG  
CACGGTTGCAGCTTTTGGCGACATGGGCGCGCACTTCGCCTGGAAAGCGCTTGGTTT  
TTAGCGCGCAGAACTCGACAGCTTCCGTCTTAGATGAGTGGTGCGAATACGCCCCGG  
GCCTTGTCGGTTTGAGGATGAGTGAAGGGATCATTGTGCGCGAACAACCCATCGAA

CGGCGCGATGCGCTTGTTCCGGCACTGTCTAAGATGGAGCACACGAGCCAGCTTGA  
ACTTCGAAGCATCGTCAAGGGCCGAGTTGTTGATTTCCCGTGTGTGAGTGGCGCAGA  
CAGACAGTATTTGAGTGCGCTCTTTACCGAGAAAGATCCCAGAGCGGTGAAGGGGA  
AGCAGGCGATGTTTGAAGAGTTGATGCGCCTAAGTGTCTTTGTTGCTCAAACGGACA  
GAGTCAACATTGATCCGTCCTTCTTGATGCGTGCGCGCTGTTTTCAACAGAGTTGA  
TGAAGAACACCCAGGAGCATGCCATCGCAGATGCGCGGGGTAAGCCTTATTTGGCC  
CACGTTGAAGGACTCATTCTTGGCTGGAACGAAATGAGTGCGAGGGTTTTTCGGGAT  
GATTTACAGGACACCCCGACTTAAATGCGTTTTTGGGAACGCGAGGAGGTTGAGCTT  
GGCCAAGGCGATCGAGGGCTGAGGTCTATCCAAATAAGCTTTTTTGACACAGGGCCT  
GGCTTCGTAGGAAGGCTGCTTGGCGCGGATTCTGAAAATTTGGAGATCGAAGAGGA  
GCGAGAGATCGTGCTTGCTGGGCTGCGAAAGCATGCAACCAGCAAGCGAGAAACTG  
GGGCGGGCAATGGCATCCCCGAGGTTCTGGCCAAGCTTCGAAAAATCGGTGGGCTG  
ATTACTATTCGCACCGGTAGGCTGCGGATCTTTCGGGCGTTCTCGCCAGGGGAAGAT  
GCGGACTTATTCGATTTCAAAGATTGGAGTGCATCAAGGCTTAGCGAGGCTGCCGGA  
GCAGTCGTGACCATCATCATGCCGATTCGACGCGCATGAGTAAGGCCTTTTCTTACC  
TCGTTTCGTGGCATCTGCGTCCGGAGTGGCATTGATGCGGAAGTGCTTTGTGTGTTTAT  
CGATGGGCGCGCCCAGCTCACCTCAAATGATCTCTTCGATGAGCTGAAACTGGCGCT  
TAAAAACCTGTTGACCTTGCCTGATGCGGTTATGGTCATTTTCGGGGCAATCCGGCAC  
TGATCAGCTCCTCAATCATTGGAGAGAGGACTCCAACGAGCGCGAGCAGTTCATGG  
CACGCGGAGAGCGAGGGGATCTACCATTTCGTCAAAGACTTGCAGTTCGCGTGCTGG  
AAGAACGATGGGCAGCTTGTTCATCTTAAAGCAGGGCGCCGGTCGTTCATGCTTTCGAG  
TGGGAGCCAAGCCTCATCATGGAAGCGGGGCTCGCCGAGCTGATGCAGCGAAATCC  
TGTGGTGCAGTGGTCTCCGGGTGGACACGCCTTTCGTACCCCTCTGGGACGGTCAA  
CAAGGTCTTCGCGCAGGCAAGAGAGCTGGCTTCAACCGAGGTGGAGCTGGCCTTTG  
TCGCCCCTCGTTGGTGAACGCGTTGCCGCTACTTCGCGATCCAGCGTTGGGCATTG  
TGTTTCATCGACAGCATGGGCATCTACTCGATCGTTAAAGAGGCCATGGACTTCGTTG  
GTGCCAAGGTCAGGATTGAGAGTTTCCATTCCCTATACAGAACTCTCCAAGCTTTCTC  
CGCCGACCGTGCCGCATGCACTGATCATCTCCGCGTCGACCACCGGGGGGATGGCT  
AAGCGACTCATTTTCAGCGAATGGATTTTCTCCTCGGAGGTCGTGCTCACACTGGTCGAT  
CGATCTAGGTCTGCTGATCGAGGCAGAGTCCTGATCGCGCTCGATGACATCGCATCG  
TTCGATCAATCACGGATGTCAGACGGAACAGAACTCAGATCGAACTCATCGGTGA  
ACACTTCACCTATCGGTCCAAGCCGCCGCGTGGCGTGACGATCAGCAAGAGGCATG  
AGCCCAAGCCATTGCACGACTACTTGAAGTGTGTTGGGGGACAGCACAGGTGTGGTG  
CTTAACAAGGCGCCAAGTGGTAAAGCAAGCCCGCATCTCATCAGCTTTGATGGCAC  
ATCTGTCGCCGTGTTGGTCGAGGTTGGGAAATGGCTGATCGAGCAGGCCAGTGGC  
GCATACCGGCATCGATTGACACCATTATTTTTGTTCGATGACAACGGCTCGGAGATCT  
TGGGTAAGCGACTAAGTGAGGCCTTGTGTGAGGCCAAGGGCGTGGCTGGACCCTTG  
GCGCTTATAGCTGCCGATGCTTTGAACGCAGCTGTATTGGCCAATTCCAAGGGCGTC  
GCCGTGGTTCAAGCGGTGCGCAGGCGATGGTGGGAAGCTGCGCGAGGTGAGTCGCGA  
TCTGCGGGAATATGCGCCTAAGCTGCCGCGTCATTTCTTAATTGGGCTTGGTGTCTC

GCGGTCAGCAGAAGCGTGGGAGCGCCTTCGTCAGTTCTTGGAACGAAGCGCTAAGC  
CGAATCTTCCCTACGGCTTCTCCACCTGGATCTCTTTGCCTATTGGAGCGGAGCCTGA  
TGCTTCGGTCTGGAAGCGCTACTCGGAACTTGGCGCGAAGCTGCAAACAGCTCCCTT  
CGACGCAAAGCCTTCTGAAAGGGCGTTGATCGAAGCATCGATCAAGCTTGCTTCCGA  
CGCGTTGGACAAGAGCTATCAGTCCTTTCTTTCTGCGACAACGGGCAAGCCCTTGGA  
ACTGACAGAAGGCTTCGTGTTCTTTCCCAAAAACCTCAAACCTGAGTCTGCATCTAC  
TGTGACGGTTTTTTTTGACCATCGCCTCAGTGATGCAGCAAGCGCGAGATACAGACGA  
TCAGTCTCTAAAACTCAAGGCTACCGGATATGAGTCTGTTGTCCTTGACCCGGAAAA  
TTTCCACCGTTTTCAATGACAGTATTTTACAAGCTTGCTTTTTTTCGAGCGGCTTTGCCA  
TCTGAACTCGATTACTCGTCAAGTCCCGAACTCAGTGGTCTGATGGCAGAATTTTTTA  
GCGAAATTGTTTTTCGCGCCATGAACATCCATACGGTGAGGCGGCTCCAGAATTTGCT  
GTTGCATTGTTATCTGGGCGGATGCGTTTGGTTTCAAGCAAGCTTGACACTGTA  
AAGTCCGCCGTTGAGAGGCTGATACATTTGGGAAATCCCAGCAGCTTGCTTGGGTTT  
CTTTTCCTCATCGGGAAGCTTCCTTAGGTCTATGGATTGGCCCAAGGTGAGGGGGAC  
GTCGCCACTTGGTGATCGGCGGGCGTCAGCACACCAGCCTTGCCCCAAGAAGGTGG  
GCGTAGCCCCTCTCCTTCATTGGCTGTTGGCATAGGGCCACCAGTGCGCCTGATCTC  
CCAAGAGACATCGCGTTGTGCTTGAGGTCGGTCATCAAGCGTTTTTCACTACTTACG  
CCATTACGGCAAGATCCAAATGGGAAATCGAAGGAGAGAATTGTTGATGCGCCAGG  
ATGCGATCCAATGTTTCAATGCTTGGGGAAGCATGATGTCTGAGCGGGTTCAGAAG  
CTCTTTGAAGGTTCTGATGAGCTATTGGAAGCGTTGGCGCCCATTACAGCGGCTCCG  
CCGTTTGATCAAAGTGATCGACTGCAAGTCTGTCGCGCGCTTTGCCTGCTTTGATTG  
AGCACGCTATTGCGAGTCGATGCTTACTTGACGCCGTTCTGAGCCGTCCACCTTGG  
TCGTTTCATCGGGCGCAGTTCGAAGCGCTGGTGCGCGCCGTGTGGGTCTTTACTGCG  
CAAGCGACACCGACGTGGCTTGCTTGCAAGAAG

>CONTIG\_117\_length\_4437\_cov\_17.552668

ATAAAGCTGAAAGAAGAGAAGAAAGGATTTGTATTGATGAAGAGAAGCGGGGGGG  
GCGAGCGCAGCTTCGGCTGGGTCAATCGCTTCAGACGACTGGCGCGCGACTATGAG  
CGATTGCCGGAACGTTGGCCGTTTGCACCTTTGTCGTCTTCACGATCCTGATGCTTG  
GAAATGCAGCCGCTCTATTTCAAAGTTCATAACACGCTCTAGGCACGTCCAATAGTG  
CCTAAGGGCCGGCCCAGGGTGACGCTCCAAACTGTGCGCAAGGCGAACCAGAACGC  
ACATAGCAGCATCGCAAAGCCGGCGGTGCTGCAGCCTGCGCCAACCGCAACGCGAA  
TTAGCTCCGAGGGTAGGTAAATCCTGACCTGGTCCACACTGATGGGATAGCGGGTA  
AAGTAAAGCCCGACGCCACACAGGAGGGCTGCGCTGCCACAGAAAAAGCCAGGC  
ATCGCCATAGGCGAGCCCGTCCGTTAGGGTCCAGAACGGACCACAGCATGTCCGGC  
TGCCGGCCCAGCACCAATACACCCGCCTGAGTGGCCAGCAACATAGCCAGCGGCGT  
AGTGAATAGGAACGGCACCATCACCAGAGCAGCAAAGATCGCGGCCGCTGCCACAA  
CGCTGATCCACCAGGTTTGATGGCGCAGCTGCGCACAGACAAAGGCCGCAACAGGC  
ATCCCCACCAATGGTACGAACCCGCCTAGCTTGTTTCATGCGACAGCTGCCGAAGCAC  
TGGGGTGGTCATCCGGAGCAAGCTCCGGGTCTGAATAGCTGAGCGATACTGCAGTTG

GTGGCCAGCTCCTTGCGAGCACGGGTGGCAGCCACGTAGAGCAGGTTGACCTCCTC  
GATCGTCTGACGTTTCGGCATCTGAGAAATCACGAAGCTTTCCAGTGTCTTCGTCGAC  
CGTGTCGATAAAATTTTCCGCAAGCTCGACATGATCGAACTCCAAACCCTTCGACCG  
GTGCGCAGTCACAACCACCAGTGCGTCCCGCTGTTCTGGGGAAGCGCTGTGCGAACTG  
GAGAGCCTCGGCTCGAATCCGGCTGAGCGCTTGGTCGAACCGCTTTCCGCCATAGCG  
CTCGACCACTTTTGCCCAGCCAGTAACTCCTTGTCTGCACAGCTTCAGCATATTTCG  
GCCAGGCTCTCGAAGGACTCGAAAGAAGCGATGAAGGGATTACGGACATCGGCGGG  
ACCGAATTGCCGAAGCTTCGAGATATCCTCGCCAATCTCAAAACGATAAGTGTGTAC  
GCCACCGACATACGCCACCTTGATTCTCTGCCGACTGCATTATTTCGCTTGTGCGAA  
AACCGCAGCGTTAGTGCGACTGATGAAGGCAGTGCCGCGTGGATTCTCAAAGGATC  
CCTGGTCAACGATCGTATCCATGCCCAAACCGCGTAGCTGTGCAGACTCGCCCTTCA  
GAGCGAGGATGCGATTTCGCCACTTCCGCAACTGCAGGACCAAAGCGGAAGGAGCCA  
GTGAGATAAAACGAGGAATCCGCCTTGACGAGCTCCATAGCATTTTTCGAGCCGCG  
AAATGAGTAGATACCCTGATGCCTATCGCCGACGTACAGCAATCGCGCGCTCTGGCT  
CTGCAGTATCGATTGCAGCACAGGATTGGTGTCTGTGCCTCGTCGATCATAATGGT  
GTCATATGCCAAGCGCGGGCGGCTGAGCTGGTAGAGCTTCAGGTAGCCGTCGTGCA  
CCATCGGCAGGTTGGTTGCCTGCATGGCCGCCCAAACATCCTTTGCAGCTGCGAGCA  
ACGCGTGTTCGCTTAGGTATTTCTTTTCTGCAGGTGAATCACCAAGCGAAACGTGAG  
TTGCGCCTATCTGCTCATCCGCCGACACAAGAAATGCCTTTACGGTTTCGATGACGC  
GTTGGTCGAACACACGCACACAGCAACCGGTAACGAACGGGTGTATGCAGTAGTG  
GTGCCGGTGATATGAAAAGGTTTGATATCGGCCAGAAGCTTCCCGTCGTATTTTTCG  
CCGTGAGGGAACCATGCCAACGAATGTCCCGTCTTGCCTTCACGTTGCGTGGAAG  
CGTCCAGCGGCCTCCAGCTGGATAGATTTATTGAACGCAACCATGAGCTGGCGCTCA  
TTGGGACGTGCATCTGCAAAGCCGATAAGCGTAGAAGACTTCCCGGTCCCAGCGAA  
TGCATTGGCACGGATAATCTTCGCGTTCGAGGCGATGATTGCCTCTTGTTCTGAGGT  
GAAATGCACGTCTATTCTCCGCCACTTTGGTTGGCATATGCTATAACAGCCAAGCGA  
GAAATAGTAACGTTTGGCTCAGGCTTGCTGCCTTAATCGATTGCGACCGCAGCAGTA  
ATCTAAGGGGATGGGCTCGCTGCCAAACCCAAGTCGTCAACGTGGCCCGCCATGTG  
GTCACGAACTATGTCCAAGACAGTGTGAGGCGCAAATGCTGAGTCCGGGAGATCAC  
GTCGGGGGATATCCAGTGCGATACGGAAAGACTCAAATCCAAGCTGTTTCATAGAGC  
CCGGTCGGTCCCCCAGAAGCGCCGTAGACGTAATTCCATTGCTCCGCCACGGACTTG  
GAGAGTGGCTGCAAGGTGAACTCTGCCCCGTCCTGCTTGTAATCCAGCCCAAGGAC  
GCGTGCAACTTCCTTGCCCACGTGCGACTAATAGTTGGAACCTGGGAACAACCTGGCTC  
CAGGCGTTCATCAGCATCACAGAGTTGCCATACTTTTACGACTTCACTGGAAATTAC  
AGACATGTTCGTGACCCTCAGTTATTTGGATAGTTCTACTCAATTAATTACCTGTCTA  
ACAGGCGCTCTATCACCATTTTCTACTTTCCCGGCTCCGTACGCCATCCATTGAGA  
ACAACTGCACTACCTCGTCAGACAGGTTGAGCCTCGGAACAACTGGTAATGCCGA  
TCCCAACGCCCCGAGAACCTAAGCTCGTCTCCAGTGAGGACGGACACTTGCTGTAG  
CCAAAATCCGACGACATGCTCAGTGCTCGTTGCAGCCGCAAGTTCAACAATCTCTGC  
GAGTTCGTATGTTTTTAGCGGCGCGCTTGCTGACCAAGGAAGCATGCGAGACCACCA

CCACCACCGACTGCCTGCCGCAGGCTTGTGGGCAGTAAGCGCCTGTTCTTCGCGCGC  
GAGACGGCTCATCGGGGAAATATTGCAATGACTTTGCATCTTGGTTCCAGCGTCAAT  
GGCGACTGTGACGAATCCATGAGGAAAACCGCTGCAATTCCGCCAAGTTTGGCGGT  
CGGCTGGCGGCAACAGCTGTGATCAACTCAGAAACCAAATCGGCGCGAATAACCGG  
GCAGCCATCGATTAGGGTCTCGACTTCCACGTCAACGCCGAAGAGCTCGAATCTTGG  
TGCTGGTGCCTGAAATTTACCATGCATAGCTGAACTCCTTTTCCGCGGACGGATCCA  
TGCCTTAAGCGGCACTGGTGAAACATAACACAACGGTTGTGGCGAAAAGACGTGGT  
ACGGCACGATTCTTGATGCCGCGCCGATACGGCGCTTACCCACGGCCAGGCGGTA  
GCGTTCGGCACCGGCAGCAACGGCAGGAGCAGTCTCAGATTCTAAGACGGGCAGGT  
GCATAGTGCGTCAGATGAGCAACCGCAAACGTGTTCTGCACTGACTGCGAAGGTCG  
CGCCTACGTTTCGACATCGCGCGAGGACATCGACGTGGGCGAGCTAGAGCACACCT  
GGATGTTAGCGATTACACGCTACAGCGAATCGGCCGACAGCCTGCCCCGCCCGATT  
GCTGCATTGGAACCTTATAGCTTCGCCACTACATCGGCATCGACGATAGCCAAAGGTT  
CGCGACTGACATCCTTGCCATCAGCATCAATCACCCAGACACCCCAACGCGTCGCAA  
AATAGGCCGAAGTTTTTTGGATGGACATTGCCTTCTTGCCGCTAAGGCACATAAAAA  
GATCGTCCATCGCAATGGCATGTCCGCCATCGGCTCTCCATACGAGCGAGGCTTTAG  
GCGGTGCGCCGGGGCCACTCACCTCCCCCATGACACGGGCTTCGTATGCAAGGCCAT  
CAGCAAGGGTAAGAGCATTGGTTGGAAGTTCGATGGTGTGATCCTCGGCAGTGACT  
AGGTGGATTCCAACCTCCAAGTCGCCCTCACGCCAGTCCCAGGTGTATGAGCGCACGC  
AAAAACCAACGCTTATCGACACAGAAGATCGCCCCATGCGGAAGATCGATGTCCTT  
TTTAAGCACGAATGCATTTGCTCTGATTGTCATGGTGTGCTCCGTTGGAAGGTGGC  
GTGTTCAAGGCGTGGTGTTC AACAGCTCGGCAATCGCCGCATCCGTGCTGCTTGGT  
CTGCTTCGTGCTAGGCCACCAGGTCGCAGCGCTCCGGATAAAGCAGCCACATCAGCT  
TCTCGTAGGCAGCTAGGCGCTGGACATCGGTCAGCGCTGACAACCTCGATGCAAGA  
TCGAGCAAGTCCACGGTGGGGGCG

>CONTIG\_118\_length\_4379\_cov\_32.738946

AAAGCAGCGTGTCTACTCCGAGACCGAGCAGCGCCGCGCCTTGATGCTGCCGCAA  
GAGTTGAAGGCGATGGGCTTTGACAAGGAAGTCTTCCTCTATGAAGGCATCCCAAG  
CCCGGTGCTCTGCGAAAAGATCAAGTATTACGAAGACGCCTATTTACCAAACGGCT  
GCTACCAAAAAGCCGAGGTGAAGAAGCTGTCTGCCGCCGTCTCGGGCTCATAAAAAT  
AGCTCTCAACCACAAATTTAAGCCATGCCGGGAAACGAAGATGCCATTTGTAAATG  
AATATATTCCTGAGCCGGATGTTGCGAAATACGACTTGGAAGCAATCGACAGAGAC  
TTCGTTGTGCGGTGGCGCCAATGCAAGAGACTGGACAATTGATCGTGATCGCGACATG  
TATTTGCGCAATGTCGCAAACGGTGGCGGCACCGAAATCGAGGTCAGAAACCAGAC  
AAAGTTCTCTTTCTATTGGCGTGGCGAGCTCCTGACGCTGAGACTGGATCTGGTCGA  
CGGTGGAGGCGCGCGAGGTCAGCCCGGTTGGTCCCATTGGAGACTGATGTGGATCA  
ATGGTGGAGATGGACTGCCTGAGCATCTCAAGGCTGACAAGGAGCAATTCATAGCT  
GACCTCAAAGAGGCCTTGCTCTCCTACAAGGATTTTGGCGTCCACTCCAGAAACACG  
GACTACCACATCGTTTTTTGAAATCGATGAGGGGTGCTTGGTGTGAATGGCACGATAT

CTGCCCAGGACGCAATCGATAGAATTCGTCAGAACCCTGGCGATTACCAAACACCA  
GAATCGCTGCGGTTCGCTCGCCGCACAGGTGGATGCGAATGCCTTCGGCAAGGTCAC  
TGTTCTCTACAGTGGCCCAGCAGCGAAAGACATCTGGTCGACTGATGTCATTGGATC  
GATGATCGATTCTGGTGAAGACATCCGGGTATTCGATAAAAGTCAGGCATCGAAGTT  
TCTTAATTCGCGAGTTCTATACCGCGCTCGCCGACATCTACGAAATTCGCCTCGT  
GAGCTGATAGAGGGGTCTCATCGGGGACCTGCCACGGAGTGGCTCTACCACCCTAC  
GCAAGGTCCTTGGGCAGATGCTTCCGGACGGTTTGCCGATGCAACCGTAGGTGAAGT  
TCATGCCATCGTGGGCGACGCTCAGCCAAGCCGCGTCTTTGGCGAAATTGAAGTGCC  
TCGCATTCTTGCCAATCCAAACGTCACCTCGATTGAGGGGCTTCCGCGTGAAGCGCT  
GGTCGGTGTGAAAGATCGGCTCGGTCAGCAAGCAGCCTTTGAGCTGATCGTGGCCC  
GTGCGCGTGAACACGAAGGCATGCTGCGCATCCCGGCCAGTGATGATGCGCTCCGC  
GAGAACAAAGTTCTGAGGCTCGATAACAGAGAGTATTTTCGTGGAACAGCAATTGA  
GGGAACGTCAAAGGCGTTAGACCAGAGCACGCTTCCGCTCAGTCAGCGTATGAAAC  
CGCCAACCGAGCATGCCCAGGCGGGTCAGGCGCGTTGGGATGAGTGGCAGGGACGC  
AACATCCAAACCACGCCGGAACCTGAAATCCCAGGCTTGCGTCGCGCCGGGATGAC  
AGCAGGGCTTGCGGGTTTGGGTGTTGCCGCTACCGCCTACGATGCGTCGCAAGCCGG  
AGAGCGTGTTGGCACGCTGTTGGCACAAGACAACCTCACCGCTGCACGCTCAGAAG  
CGTTGCACTTTGCTGCGCGAGGCGCGGGCGGCTGGGCGGGAGGCGCCGCTGCCGCT  
GCCGTTGTTGGCACAACCGGTGCAGGCCCTGTCGCGTTAGTAGTTGCCGATGGTTAT  
CTGTTCAGTGCCGCTGCCGACAAGGCCGCGACCTTGTGGGACAACCGCCAGATCTAC  
ACACAGACCGATAAGCAGGGCGTGAGCTGGGAGTTCAACGGCAGCCAGTGGCTTCG  
CCAAGAAAAAGCCGACCTGCAAGACGATGGCGTGGATACGCCACAGAAGCAGGGC  
ATGTTTCGCACTGCCCGAAAAAGCGCGCGAGCTGAACTATCACGCCAGTGGCGAAGC  
GACCGAGCAGGCACTGGGCAAGGTGCAACCCAGTAACCCCTATGTGCAGCCATCCA  
GTGAGGCAGATGCTGCGCATCTTTACGCACGGGATTGGCGGCATGATCCGGCAAGT  
GGCCAGTGGTCTCGGATGGTCGCCGATGAAGTCGATCGGAACGATCGGCCCATCTG  
GACGGTGGATCCAGCAGGTCCTGAGCGCAGTGCCGCGTTGGACCAGCAGGCAGCCC  
AGGTGGTTGACGCCAACATCGCCCGAGGTCCGGCCGCAATTGCAGCAACCTATCAA  
GCTGCGTATCAGCGCAATGGTTGGGGGGACTTCGGCCCCCTTGCCAGCGGCTGTGCAA  
ACAGCCTTGAACCCGGACTCGTTGCAAGCCTCAGACGGCAAGCAGTATCAGCGCGA  
TACGCAAGGCCAGTGGCGCCATGACGGCGTTGCTGCCGAAGGCAATGTCCCGCTGG  
AACTCAAAGCAACGCGCGAACGCTTGCAACCGGCATTGGAGCAGCACGCGCAGGCG  
TTGGCACAGATGCCGGCAAGGCAAACGCCAACGCCACAGCAGCAAGACCAGGCCA  
ATACCGAAGCGACCTATGCCGCCTATGGCGTTGCGCCCAATGCCCAGACTGCAAGC  
GCGATCCAGCTTGCGGTGCAACGGACACGTGAGGCAAACGGGATCGATGCCGCGAC  
CAGCTCTTTGGCGTTGGAGCGTGATGCGACTGGGCAATACTCGGTGGACAGCCCCAT  
CCAGCATCTGAGGCGAGACGCCGATGGTGACGTGCGCGTTGCGGCGACCACCAGCG  
CTGACGAGATCCATCAGGCAATTGGCGAGGTGCAGTCACTCCGGCAAGAACAATTC  
CCTTCGGCCGGTGCGCCGGAGCAACGCATTGACGCGCAATCGCCCCAAGAGCGCGA  
TGCCTACGAACAAGCGTTGCGGGAGGCCAATCGGCAGGGCGTTTCCACGCAAGAAG

CGCAACAGGTCGCAGGCTTCGCCGCAACGACGGTCACCGCTCCGCATGTGGATGAA  
ACCCAAGGGCCTCAGGCAGCCATTGATGCGCAGAGGGATAGAGACGTTGCACGCGC  
TGCTGAGCAGCCTGCTGTAGCAGAGGCCGGCACACCTGCTCCGGTCGTGATGCCTGC  
CCCCGTCAACGCCCAAACGCGGGAAGAGCCGTCCCAGGCTGCCAAGCCCCGCCGAAC  
CGAAGCCCCGAACCTGTCCCGCAACGCGAACCCCAAGAAACCCAGGCACCTGAGGTT  
GCCGCACCCTCGGCAGCCGGCGCAGTCCAGCCGAAGGCAGAGGCAGTGGTCCCAAC  
CTTGGCAAGCGCATCTGCGCCGAGCGCTGGATCGGCATCATCCGCTTCGACCTCTGC  
CGATCAAGCGGCTACTCAGGCCACTGTGCCGACGCAGCCGCCGGCATCAAGTGAGG  
TGGAAGGGCTGCGCCTCGGCGATCGAGGGCAGGAGGTCGAGTTCTTGACAGTATCGC  
TTGCAGCAAGTGGATGCCCCGTGGTCCGAACGGCCAGGCCGTGCCGCAAGACGGGCA  
CTATGGTCCAGAGACCGAGCATGCCGTGAGGCAGTTCCAGCAAGACCAAGGGTTGC  
CGGCAACGGGCGTTGCCGGCCAGACCTGGATGCTGCATTGTCCCAGACACAACAC  
GCGCGCCGAGAAGCTCTGAAACCCATAGAGCCATCATCGGCTAATGCATCGGTGGA  
GCAGGGCAGCGAGCAGCAAGCGCAAGGAGTTGCACCACAGAACGGTGCGCCATCG  
GCTGTTCCATTGCAGGCAGAGCAGCAAGAGGCGGTGCGAGCGCCGTGCGCGGCAAT  
TCCAACGCAAAGCGAAGTGCTGGCGCAGATCGTATTGCCGGAGCCCCAACCCGCTG  
CCTATGTGTCGTCGCTGGGTTTTGGTGGGGAACTGCCCGCTCAGACACACACGAAC  
GCATTGAGGATCGGGTTGAGCAAATCAGGCCCTCCCAAGATGTCGCTCAGCAGGCG  
TTTCCCTCTGATCATCGAGATTACGCGTTGTTCTCTGCCATCCAGGCGCAGCTCCCCG  
GTGGCACATCTGATGAGAAGACGGCCGAAGTGCTGCATGCCGTCAAAGAGTCAGGG  
ATCGAACGCGCGGATGAACTCCGCAAAGTGATCATCCAAGATGATGTGCCTTTGTC  
TTTGGCAAAACGCCGGGCTTTCCTCGGAAACCTCGCTCAACACGCCATCGCCTGGC  
ATCAATGACACCTTGAGAAAGACGGAAGCATTGGATCAGCAACGGGCGCAGGAGAT  
GGTGCAGTTCCAGCGGGAGCGCGAAGAGATCGACAAGAATCCAACAGGCCCCGTGA  
TGACGATGGCCGCTCGCTCTCAACAGCAGGCGATGTCAGACACGTC

>CONTIG\_119\_length\_4358\_cov\_5.906169

CAGGTTGGTCATGCTGACATTGCCGCGCTGCGCGGGCAGGCAGTGTTTCGATCAGAG  
AAAATTGTGCTGGCGTGATCTCCATGCTCAATAGTTTAATCGCTCGGGCCATTAGTG  
TTAACAGGCCCTAGTCCGCGCCGCATTGAACCAAGCCCAACCGCTGACGCGTTCTAA  
TGTCGAGGTTTAAGCCCAAGGAGGCCTTTGGCTACTCATCCTCATACAAGTTGCTGC  
CACTTCGGTTTCGGCGCCTGCCGTGGGATGAGACCCGCGCGTTTCGTGTCATCAATGG  
CTGGCGACTGGCTCCTCATGGACATGGCTGACCTTCAAAGGTTTGTCTCCCATGAGC  
TCTCTGCAGACTCTCCTTTGCTCGCAGATTTACAGGCTAGGCACTTGGCGATCGCGG  
AGACCGACCGCAGCAGCCTATCGCCGCTCCTGAGTCAGATCCGCACTCGAAAGTCCT  
ACATGGTGGGCGGGCCAGCACTTCACATTTTCGTTGTGTCTTTGCGGTGCCACCACA  
CCTGTAGCTATTGCCAAGTGTCCCGCCAAGCAACAACCTGCCACCGCCTTTGATATGA  
CTGGCTCGCATGCGGAGCAAGCGGTGAGCGGCTCTTCGAATGGCCCAGCCAAGAA  
CTCACTATTGAATTCCAAGGTGGGGAGCCCCTGCTCAACTTTGAGCAAGTCATTGGC  
ATCACGAAGCTCATCGTCAAGCGCAACGTTTACGAACGGAGAGACCTACGATTTGTC

TTGGCTTCGACCCTTCATGACCTCACCGAAAGCCAACTGGCATTCTTCTGGCAGAGCAC  
CGCTTTAAGTTATCCACCTCTTTAGACGGTCCAGAATGGCTCCACAACGCGAATCGC  
CCGCGACCTGGCCGCGACAGCTATCGTCGCACCCTAAACGGTATCGACCTGGGGCG  
GCGCTGGCTTGGGGAGGATGGGGTTTCGGCTCTGACAACACTGACCAAGCTGAGCTT  
GGGAGTCCCAGAAGCGATCATCGATGAGTATCGGAAGGTAGGACTTCACTCCATCT  
CGTTGAGGCCTCTTAGCCCCCTACGGATTTCGCGAATCGGACGGCTCGCCGAACCGGCT  
ACTCAACGGAAGACTACCTGGCCTTCTACACACGAGCCTTTGGCCACTTGATAGCGG  
TCAACCGCTCCGTTACGCCTTAGAAGAGTCGTATGCGTCGCTTCTGCTCTCGCAGC  
TCTTCACTTCGTTGGTTCACGGATATGTCGATCTCAGGTCGCCATCTGGTGCGGGCCT  
TGGCGCTGTCATCTATGACCACGACGGGCGGGTCTACCCTTCTGACGAGGCAAGAAT  
GCTCGCAGCGATGGGAGATGACCAGTTCGCGCTTGGAGACGTTTCACAACCGGTCTG  
CCAGTTGGCTTTCGTCCCCTGTCATGGCGCGGCTATTGGAAGCTGGCGTAGCTGAGG  
CTTTACCTACCTGCTCCGATTGCGCATTCGTGCCGCTGTGCGGGCGCGGACCCGATTG  
AGCACTACGCACGCCAGGGAGACACCGTCGGACACCGCCCGTCTAGCGATTTTTGC  
AAGAGGAACATGGGCTTGTTTCGATCTTTTGTGGAGCGCTACGAAACGTCTGACCGG  
TGGACCCAAGGCCTGATGAGATCCTGGGCGAATCCCAAGGCAACGGAGGAAGTTTC  
CAATGTTGCCGCTTGAGACCAAAGCACTGCTTGCGCCATCCACCTGTGCATCCCTAC  
TGAAAGTCGTTGGCTTGGCAGATTTTTTCGCAGTCCTCCCTGCCGTTGGAGCGGATGG  
CTTTGGATACAAGGGGCTTGGACCTGCAACGGTTGAGCGAATCACTGTTAGGACTGC  
CCTGGGGCGCTGTCCTTGACCTGAAGAAGCGGCGTGGTTCGACGATCTCCCTCTCG  
TTCGCTTGAAGGGATCGCAGGACCTCTGCAAACAGGGGACGTCATTGAACTCAATC  
CGCTTCAAAGCAAGGTTGCCATTCGCTACCGACGGGGCGATAAAGGAAACGTGCTG  
TTCGCCACCGAGCGTTGCAACAGCTACTGCCTGATGTGCTCGCAGCCCCCGCGTGAA  
GTCGAAGACGCTTGGCGTGTCCAGCATCTGTTGGACTTGATTGACCTAATCGACCCG  
AACGAGCCCTCTCTCGCGATCAGCGGAGGCGAACCACGTTGCTGGGAGATGGCTT  
GGTCCAGGTGACCCAGAAGTGTGCGGATGCGCTGCCGAACACCCACATCCATGTCC  
TCTCGAACGGACGGCTGCGTGATCCCGCGCTGCCTGCAAAGTTCGCGGGTATCCACC  
CCAATCTAAGTTGGGGTGTCCCGCTCTATGGCGATCACTACGCCCTGCATGACTATG  
TCGTTTCAGAGCGAAGGCGCCTTCGCCGAAACCTTGCGGGGCTTGTATGCCCTAGAGG  
CCGCTGGCCAGAGAGTTGAGATCCGCGTCGTGCTGGTGAAGCCAAGCTTCGAGCGA  
CTGGCACAGCTCGCTCGCTACATCTGGCGCAACCTTCCCTTCGTGGAGCACGTGGCG  
CTGATGGGCATTGAACCAATCGGATTTGCAAAAGCGCATCAGCAGGAAGTGTGGGC  
TGACCCAGCCGATTACGCGGCAGAGCTTGGGGAGGCGGTTGAGACGCTCGCAGAGG  
GAGGAATTGCTGTCTCTCTCTACAACCTTGCCGCTTTGCACCCTGGATCGCTCTCTTG  
GCCGTATGCAGTTCAGAGCATCTCGACTTGGAAGAACGACTACCTTCCTGCATGTAA  
CGCTTGCTCAGTTCGAGAGCGTTGCGGCGGGTCTTTTCGTGGGTCACTCCGGCGTG  
GACCAGTCGCGCCGTATACCAATATTGGAAGCCTAGACATGTCCAACGCCTTGATG  
ATTATCGGCTCTGCCACTTTTGGCAGCTTGGCCACTGAGCCGCCCAAGGGACAGTCT  
GATCTCATGATGCTTTCTGAGATGGACGGGAAATACGCCACAGTTCTGAGCACCTCC  
TTGAACGCCGGGCGGCACAACCTCTATGCCGGGCATAGAAGCCACAGCTCCCACCG

CTCGCACAGCTCGCATCGGTCACACTCTTCCGGCTCAGGAAGTTCCTACAGATCCTA  
TTCGCCCCCGCCTGCCACGACCTACACGCCGCCAGCGAGCACCTACGCACCGTCCTC  
TACGTCAAAGAGCACCGGCAGCACCTCGGGCGCGTCGTATGGCCAAAGCTTGCAGC  
CGACTGGCCCCATCAACGACTTCAGCAAACCAGATTAGTTCGCAATCGCTCTCGTCGA  
CCTCGACCTCGACCTCGACCTCGACCACCAAGCTTTCCTCGGAGGGTCGGGATGCGG  
ACGCCCTGAAGCTACTCATCATGCGAGTCCAGGCTGCCCTTTACTCGAAGGGCTACG  
ACCCCGGTGCCATTGATGGGACCCTGACGCCTGAGACGAAGTTAGCCCTTCGGCTGT  
TCCAGCGAGCCTATGGACTCAAGGCGACCGGCACCATGACCACTCCAACGCTGGAT  
GCGCTTGGTGTCCGGCTGTAAGCTCAAACTACTCTTTTCTAAATTAAAGCGGTAAAC  
ACAGGAAGCAGTATGAATGTAAGCACCGAATCTAGTTCGTTCAAAAGAAAGCTAGT  
TCACCACATGGAGGAGGTAGCTGACTTCTTTGTGCATATGCTGATAGGCGTCATATT  
TGCATCTACGCTCTTCCTCGCTGCAGTAATAGTTGGATGGGTAGCCCACTGGGCTGA  
CCTACAGCTAGCGGATGAATTTGTTAAAAAATCAATCATCTTTCTTGAGCGCGCCAT  
TGTGGGCGTTGACATCACCCCTTTTCTTATGCTACCTAATTAAGTCAAGCCTAAAAAT  
AATTTTCTTGAAAAAAAGCAAGATGAATGAATACCTCGATGCTTTGAAACGTGGA  
GCCATTAGGGGAGCAAAGAGCGCACCCGGTGACTTCTTCCTTCCACTCACTTGGTTA  
TTCAAAAAAATTTTTTCTGAAGGGCACCGCCAAGCCAAGCCAATCAGCAGACACCC  
TGACGCCACCAAGAGCAAGAAGCTGAAAAGTCTGAGAAAAATCGAGGAAAAGCT  
GCTCATTCTTAGTCGCTCTCTAAGCGAACTGCAAGCTAAACGCTTTAGTCAATGAAC  
TGCATCCCAGGGGTTATCTCGGGTTTAACCGTCTCCCGAATCAACAAAAACTGAAGC  
ACGTTGGAGTGACTTGCCGGAGACAAAATAACGGCAGACTCGTATCGAACGCGAC  
AAATATTGACGAATACGCGTGAACAGCGGACGGGCGAACCTCTAAAACGGAGTGCG  
GGGAAGCACTATCGCCGGAGGCAGCCTATCTTCAAGGTCGCGGCTTCGCTGCGCCG  
AGCGTTCCTGCGCCAGGTGTCGCGTCAGCTCCCCCAGTGCCGTATCC

>CONTIG\_120\_length\_4338\_cov\_15.307528

CAATCCCGCTTGGAAGTGCACGGCATTGATACTCATCACGCCACCTCGTTGGCTTCA  
GGTGACAGCAGCATCCACCCAGCGCGGCGCAGATCCTGCGACAGGCGGCTGATGGT  
CAGGGCTAATCAGGTAAATTGTTGAATTATTGAATCCTGTCCATTTACATTCCTCCCA  
CATATCTTTGCCGTCAGTGCTAACTTTCGCTTCCTTGTTTCACTTGTATATAAAGTCC  
TTAGTTATATACGTATATGTGCGCAGGAAGAGACGATAGCTTGGCTGCATGATTTGCA  
GCACGGCCAACCCACACAAGATCGTTTCGCACCACGAACACCCGTTTTAGCAACAAG  
CAGTTTGCTGGTATCAATCCCGGTGACATGTTTGATGGTGTAGTCGTCGCTCGTATA  
GACGCGTTTCATCTGAGGGATGACGATATTCGTCACTGCCCACTTAATATTCAAAGC  
TGCCTTAGCGGGCGTTGGTATTCTTGTAAGTCGCCAATAAAAACTGCCATTACACGGTC  
GCCGTCATATGCTGTGATAACGCCATTGTGCTCTCTGATGATCTTGGCTGCGCAATA  
GAGGAAGGTCTTGTAATCTCAGTAGACCGGGTGGCTGACTTTGTATCTACCATTGT  
TGTCGAATCAGCCATGTCAGCGTATAAGACAGTGCCTTCGATCTCTATGGCGTCATT  
CTTCAGGCCGAGCTTTGAGTCTTCGTCCGGGACCTTTGTCCCGTCGCGCTTCGACCAC  
TGTGACCTGAAAACGTCATAGCACCAATCCTCAAGATCGCTCTTAAGTCCCATTTTT

CAGTCCTTTGGTCCGGCAGCAAGAATTAATTCGCGCAGCCTCGCGCACGCGGGTGCG  
ATGTAGTGTTCCGCATCTTTACCCTTCACGTAGCGATAGGGGATGGTCGTCAATCCT  
GCCAAGTCGCTCGGCAACTTCAAATCCACATCCCGAGGCTCCATCAGGAAAGCCCG  
GCGCCGCCCAAGGCGACCCATGAAAAGGCCAAACTCCAAGATGACGTTGTCGCGGA  
TGATCGGCCATTCGTCTGTCGTGATAAAAACATCGTCCCCGTGCGCGACGGCAA  
TAGCGAAATCCGAGTCGTCCAGTTCGGCCTCCAACTCGTCAAGCGTGTATTGAGATG  
CCCGAAACACGCCGTTCTTCCATGCCACCGCTAGAAACGGATCGTGTGCGAATTGCT  
TGATAAGTAAGTCAACGATTGGTAGCGCTTCCACGGAAGACATGATGAATACCCGA  
ACCCGCTCTCGCTGGGCGGTACCAAGTGATTTTCGTTCCGCCAGCCTCCGGGCGAGC  
GTTGCCGCAATCCGCCTCCACACATCGGGGAACTGGTCCGCAGCAGCCGAAAATTC  
GGCCTCGCTGATTTTGATCAATACCGTATCTTCAACGGGGATGACCGATGCCGCCCG  
GGGCTGAGAGGGGCTCGATTGCGGCCATTTCTCCGACGGTATACCCGGGAAGCGGTT  
CGCTACAACTTTGCCGTTGACCCGAACTTCGACCTTGCCGGCGATGATGAAGAAAAC  
CTCCGAAGCCTGGTCTCCCTGATTGATGAAGGTGGTCCCAGCGGGAACCTCCATCAA  
TTCGCCCACGGCCACAAGCCGTTCCGCAAGCTCCTGCCGTTTGCTACCAGCCTATG  
TTCCGTGAGGGTCGCGACCAAGCGCCGCGTCCCTCGTCCCCTTGAAATCGCTCGAT  
CATTACGCCCCCGTAGCGTCTAAGTCTGTTTAGGATGGAGCGCCGCCGCCCTCTATT  
CAAGGTGAGTGCCTGCCTCAGGTGTACCGGTTCTCAGATTGATGGGCCACGTGCGAG  
GCGGCATGAATCAGGCGGGTGTCTGGAGCGTGTAGCCATCGATGGCCCTGGCACG  
GTCTAGAACCGCTCCTCGCTCGGGCAGCAGCTCTTTGCAGAGCGGGCAAAGCCCTTG  
CTGCTCCTTCATCTTGAGCTGCTTCAAGCGCCGCGGACCATCGGCTTGCTGCGCTC  
GTCGTGCATCAGCTCCTTGTAGACCTTGCGGCGGTAAGCAAAGAGCAGTTCCTTGTC  
GCCGTGCTCAAGTTCACGAGCCTCGCCCGCACTTCATCGAGCAAGGTGCGGGCGA  
GGTCGAGTTGGTCGGGCGTCAGTCGCGGATTGGCCATGCGCCAAAGATAGCCCGAG  
TGCCCGAATGTCAGAACTCTGGCAGGTTTTTCGAGGTTGTCCCGAGGCAATCCGTTGT  
CCACTGTCTTGATGTAGTCAGCCCCATTGACCCTGATGATGTATAACGGGCTGTCCCTT  
CTGCCATTGGCTGTTTGCGTAGGGGATAGTGATGAACGTGACCCCTTCCTTGATCGC  
TTTAACGATGGCCGCGCGCTCGTGCTCGGTAGCCGGTCCGAAAGTGTACCGTTGTC  
CTGATGGATGCGCACCCGGTCGATATGCGTGTGCGCCGCGCTGTACCGGACAGCCG  
AAATGCCGTAATCCGCCCATTTAGCCATGTTGCCCCCTACGATGGTTGGTAGGGTTA  
TCGTAGTGGAGCTGCGTCGCACAGGCTGCGACTGAACAACAAGAAGGCCACCTCGA  
CGGACGGCCTTCTCGCCCCCATAGCCCGGCAAATAGAGCGTAGTAGGTTTTTTTAGT  
GTGGTAGTTCGGAACCTGTTTGGCCGGAGCCACTACCTATAGGAGAACTGGTGGAG  
AGGGGGGGTAATGATGTCCTGACTCTCCTGCAGCACGTAACCTAGGAGGGTGTCTTG  
CCTTGTGAACCGCCATTGTTGCCGCCTGGAAGCCACTATTGACTAGTGGCTGACCTA  
TTGCGTCGTGCCTTGAGGCGCAGGTTTGCTGATCGAGGAATTGCCGGGGGCAAGGT  
GGTGCCTAGCGGAGTAGGAGCAGGGAACGCATACTTTTGGGGCGCGGGAACCTTGA  
GTCTCTCTAAGGTTGTGGAAGAGATGTACTCATAGAGGCCATGACAACTCCACCAT  
AGGTGTGTAGGTGAGGTGCAATAAGACTGAAGCCCCGGTCATCTAATGATTGATAC  
CTGCGGTAAGTCCAATGAGCGACGAAGTCCGCCATCTGAATCAAGCGCGAGGCTTT

GGAGTTAATGAAGAGTGGGACTTCGGCAAAGTTACGCAGTCTCCCCGTGGTATGGC  
CTATCGTTTTGAATTCATACGACAATGACTGAATGCTTTGCTCAAACATTGCGTCATC  
AAAAATAACAATGCCGCGTTGAGGATCCTTTGCTAGTCTGTAGCGAGACGCCAGAA  
AGCCGTCGAAGCAAGTCGCCGAGTGCTCGAAAGCCTTGGGTATGATTTCTGTGACGTT  
GTAGAAGCGGCTTTTCGATCACCGAGGCGAAGACACGAGCTTTAAGTTGAACGTCA  
CTGAGTGCATGCAGGACGTCAACCGTTGCTTGTGACCGGTCGTTGGGCTCAAAGTTT  
TCCCAGCCATCCGAGCCCCCCTCATCACGCTAGCATGGAGCTCGATGTTTTCCGGA  
TGCGTGGGGTGAAAGCGGCTGGCAATCTTTGTCAGGTGCTGTTTCGAGCCAATGCGTT  
TGTCGCTCAAAGATGCAGACGCCAGCAAGGACGAAAAAGTCAGAGTTGGGGTCGTC  
TACAGACCCTGAGTCATCAAGGTATAGCAGAAACATCTCGTCGCTCCGTAACGAAA  
AAGGGCCCTCTTCAGAGGGCCCTTTTGTTGGTTTCGGTGAGCCAAGTGAGACAATCGC  
TCAACGCTCTGCAATTTTCATCAGCGCTCCCAGCTCGGAGAAAATTATACACCGATG  
GTAGCTTCTGGCAAGTAGATATTCGCCTTCCGTAAAGCTTTGTGTTTCCGTGACCATC  
TCCATGGTTCTGAACACTACCACAGTCTGCCACGCCATGGCGCAAGACTTCTACTC  
AGTGAGTTGCTCCCAAGTTACGAGCAGAGCCACCGGGAGCCACTTCAGGAAGGCGA  
TGGTGGCCATGCCCATCGTCAGTGCAAGCGGCGTCATACCCACCACTGGGCCCAGC  
TGAAACCCTGGTCGCGCTGCCGAGCCGCGTAGGCGGCCTGCGGGTAACGCCGCTCC  
GCTTTCCGCAGGCCCCGTCGAGCCATGAGCGGCCCAACGATGAATCCGAGCGGGCC  
CAGGAAGAGCAGGGACAGCGAATACCACCAGAAGAACCGGTTGTGCGGAGTAGTC  
ACCTTCTTGGGGGCGCGCGCATGGCGCCGTCTTCGCGGAAGTCGCCGATGGCGCCT  
GCCGACATTTCCACCATCGAATCGGGTTGGGTCTTCATTTGGCGTAGGCCCTCCAGG  
TGCCGTCGCTCTTGGCGTAGCGCAGGTTCTTGCTAACGGGGATGGGCACTTGCCGGC  
CTCCGATGTCGATCGCCACCTTCCC

>CONTIG\_121\_length\_4295\_cov\_13.879079

CCTGTCGGGTTCTTGTGATTTCTTCGCGTTCGCGCTGGAAGTGCACCATCTCCTGCA  
CCCGCTGCTGATCCAATGCCTCTGTCTTCTGCAAGGTCTCATTGATGCCGGGCGACG  
GCGTGTGAGCGAGGTTTCCGAGTGAAAGCCCGGCGTTTTGCCAAAGACAAAGGCG  
ACATCATCTTGGATGGTCACTTTCCGGAGTTCATCCGCGCGCTCGATCCCTGACTCTT  
TGACGGCATGCAGCACTTCGGCCGTTTTCTCATCGGATGTGCCCCTGGGGAGCTGCG  
CCCGGATGGCAGAGAACAACGCGTAATCCCGATGATCAGAGGGGAAACGCCTGCTGA  
GCGGCATCTTGGAGGGGCCTTGCTTGCTCAACCCGATCCTCATCGTGTTCTGTGCG  
TTAGAGCGGGCAGTTGTCCACCAAAAACCTGGCGACGACGCATAGGCGGCGGGTTG  
GCGCTCCGACAACACGATCTGCGCCGGCACTTCGCTTTGCGTTGGAATTGCCGGCGA  
CGGCGCTCGCACCGCCTCTTGCTGCTCTGCCTGCAATGGAACAGCCGATGGCGCACC  
GTTCTGTGGTGCAACTCCTTGCGCTTGCTGCTCGCTACCCTGCTCCACCGGCCCATTT  
GCCGATGCCGGCGCAGTGGGTTTCAAGGCATCTCGGCGCGCGCTTTGTGCCTGGGAC  
AACGCTTCATCCAGGTATGGGCCGGCAACGCCTGTCGCCGGCAACCCTTGGTCTTGC  
TGGAAGTGCCTCACGGCATGTTTCGGTCTCTGGACCATAGTGCCCGTCTTGCGGCACG  
GCCTCGCCGTTTCGGACCCCGGGCATCAACCTGCTGCAAGCGATATTGCAAGAACTCG

ACCTCCTGCCCTCGGTGCGCAAGACGCAGCCTTTCCACCTCATGCGATGACGGCGTT  
GTTGGAACAATTGCCTGGGTTGAAGCTTCCTCACGAGACGTGAGAGTTGATGCTGCC  
GATCCAACGCTCGGCACAGATGCGCTTGCCGAGGGTGGGGCTACTGCCTCTGCCTTC  
GGCTGGACTGCGCCGGCTGTGCGGGGTGCGGCAACCTCAGGTGTTGCGGGTTTCTTG  
GGTTCGCGTTGTGGGACAGGCTCGGGCTTCGGTTCGGCAGGCTTGCGGACCGGGGCGC  
ACGTCTTCTGGCAGCGGCGCGTTGACGGATGTAGGCATCACGACCGAGGCAGGCGT  
TGCCGTCTCCGCAACAGCAGGCGCGTCGGGTGTGCGTGCAACGTCTCGATCCCGCTG  
CACGTCAATGGCGGCCTGAGGCGCTTGGGTTTCGTCTACCCGCGCAGCGGTGACCGT  
CGTTGCGGCGAAGCTTGCGACCTGTTGCGCCTCTTGCGTGGAACGCCCTGCCGATT  
GGCTTCGCGCAGCGCTTGCTCGTAGGCATCGCGCTCTTGGGGCGATTGCGCGTCAAT  
GCGCAGCTCTGGTGCGCCGGCCGAAGGCGGTTGCTCCTGCCGAAGTGAAGTGCACCTC  
GCCAGTGCCTGATGGATCTCGTCAGCGCTGGTGGTCGCCGCAACGCGCACTGCACC  
ATCGGCGTCTCGCCTCAGATGCTGGATGGGGCTGTCCACCGAGTATTGACCGGTGCGC  
ATCACGCTCCAACGCCAAAGAGCTGGTCGCGGCATCGATCCCGTTTGCCTCACGTGT  
CCGTTGCACCGCAAGCTGGATCGCGCTTGCACTCTGGGCATTGGGCGCAACGCCATA  
GGCGGCATAGGTGCTTCGGTATTGGCCTGGTCTTGCTGCTGTAGCGTTGGCGTTTG  
CCTTGCCGGCACCTGTGCCAACGCTTGCGCGTGCTGCTCCAATGCCGGTTGCAAGCG  
TTCCCGCGTTGCGTTGAGTTCCAGCGGGACATTGCCTTCGGCAGCAACACCATCATG  
CCGCCACTGGCCTTGCGTATCGCGCTGATACTGCTTGCCGTCCGATGCTTGCAGCGA  
GTCTGGGTTCAAGGCTGTTTGCACGGCCGCTGGCACGGGGCCGAAGTCCTCCCAGCC  
ATTGCGCTGATAGGCAGCCTGATAAGTCGCTGCAATTGCAGCTGGGGCCACGGGCAA  
TGTTGGCGTCCACCACCTGGGCTGCTTGTGATCCAACGCGGCACTGCGCTCGGGGC  
TTGCCGGATCAACCGTCCAGACGGGGCCGATCGTTCCGATCGACGTCGTCGGCGACCA  
TCCGTGACCACTGGCCACTCGCCGGATCGTGTCGCCAATCACGTGCGTAGAGATGCG  
CAGCATCTGCCTCGCTGGATGGCTGCACATAAGGATTACTGGGTTGCACCTTGCCCA  
GCGCCTGCTCGGTGCTTCGCTACTGGCGTGATAGTTCAGCTCGCGCGCCTTTTCGG  
GCAGTGCGAACATGGCCTGCTTCTGCGGCGTATCCACGCCATCGTTGGGCAGATCGG  
CTTTTTCTTGGCGCAGCCACTGGCTGCCGTTGAACTCCCAGCTCACGCCCTGCTTGTC  
GGTTTGCGTATAGATCTGGCGGTTGTCCAGAGCGTCACGGCCTTGTCGGCAGCAGC  
ACTGAACAAATAACCATCGGCCACCACCAGCGCGACGGGGCCCGGCGCCGTTGTGC  
CAACAACGGCAGCGGCGGCGGCACCTCCCGCCCAGCCGCCCACGCCTCGGGCACCA  
AAGTGCAGCGCTTCTGAGCGCGCAGCGGTAAGGTTGTCTTGGGCCAAGAGCGTGCC  
AACACGCTCTCCGGTTTGCGACGCATCGTAGGCAGTGGCGGCAACGCCCAAGCCCG  
CAAGCCCTGCTGTCATCCCGGCGCGACGCAAGCCTGGGATTTAGGTTCCGGCGTG  
TTTGATATTGCGTCCCTGCCACTCATCCCAGCGGTGCTGACCCGCCTGGGCATGCT  
CGGTTGGCGGATTTCATTCGCTGACTGAGCGGAAGCGTGCTCTGGTCTAGTGCAATTG  
ACGTTCCCTCAATCGACGTTCTCGAAAATACTCTCTGTTGTCGAGCCTCAGAACTTT  
GTTCTCGCGGAGCGCATCATCACTGGCCGGGATGCGCAGCATGCCTTCGTGTTACG  
CGCACGGGCCACGATCAGCTCAAAGGCTGCTTGCTGACCGAGCCGATCCTTCACACC  
AACCAGCGCTTCACGTGGAAGCCCCTCAATGGAGGTGACGTTTGATTGGCAAGAA

TGCGAGGCACTTCAATTTTCGCCAAAGACGCGGCTTGGCTGAGCGTCGCCCCACGATG  
GCATGAACTTCACCTACGGTTGCATCGGCAAACCGTCCGGAAGCATCTGCCCAAGG  
ACCTTGCGTAGGGTGGTAGAGCCACTCCGTGGCAGGCCCCCGATGAGACCCCTCTAT  
CAGCTCACGAGGCGAAATTTCATAGATGTCGGCGAGCGCGGTATAGAACTCGCGGG  
AATTAAGAACTTCGATGCCTGACTTTTATCGATAACCCGGATGTCTTCGCCAGAAT  
CGATCATCGACCCAATGACATCAGTCGACCAGATGTCCCTCGCTGCTGGGCCACTGT  
AGAGAACAGTGACCTTGCCGGAGGCATTCGCATCCACCTGCGCGGCGAGCGACCGC  
AGCGATTCTGGTGTTTGGTAATCGCCAGGGTTCTGACGAATTCTATCGATTGCGTCCT  
GGGCAGATATCGAGCCATTACACCAAGCACCCCTCATCGATTTCAAAAACGATGT  
GGTAGTCCGTGTTTCTGGAGTGGACGCCAAAATCCTTGTATGCGAGTAAGGCCTCTT  
TGAGGTCAGCTATGAATTGCTCCTTGTGTCAGCCTTGAGATGCTCAGGCAGTCCATCTC  
CACCATTGATCCACATTAGTCTCCAATGGGACCAACCGGGCTGACCTCGCGCGCCTC  
CACCGTCGACCAAATCCAGTCTCAGCGCCAGGAGCTCGCCATGCCAATAAAATGAA  
AACTTCGTTTGGTTTCTGACCTCAATTTCTGGTGCCGCCACCATTTGCGACATTGCGCA  
AATAAAGGTCGCGATCACGATCGATTGTCCAGTCTCTTGCATTGGTGCCACCGACTA  
CAAAGTCTCTGTCGATTGCTTCCAAGTCGCATTTACAAACATCCGGTTCCGGAATAA  
ATTCATTTACAAATGGCATCTTCGTTTCCCGGCATGGCTTAAATTTGTGGTCAAGAGC  
TATTTTTATGAGCCCGAGACGGCGGCAGACAGCTTCTTCACCTCGGCTTTTGGTAGC  
AGCCGTTTGGTGAAGTAGGCATCTTCGTAATACTTGATCTTCTCGCAGAGCACCGGG  
CTTGGGATGCCTTCATAGAGGAAGACTTCCTTGTCAAAGCCCATCGCCTTCAACTCT  
TGCGGCAGCATCAAGGCGCGGCGCTGCT

>CONTIG\_122\_length\_4192\_cov\_21.511931

GACGTGTCTGACATCGCCTGCTGTTGAGAGCGAGCGGCCATCGTCATCACGGGGCCT  
GTTGGATTCTTGTGTCATCTCTTCGCGCTCCCGCTGGAAGTGCACCATCTCCTGCGCCC  
GTTGCTGATCCATTGCCTCTGTCTTCTGCAAGGTCTCATTGATGCCAGGCGATGGCGT  
GTTGAGCGAGGTTTCCGAGTGAAAGCCCGGCGTTTTGCCAAAGACAAAGGCGACAT  
CATCTTGGATGATCACTTTGCGGAGTTCATTCGCGCGTTCGATCCCTGACTCTTTGAC  
GGCATGCAATACCTCAGCCGTCTTCTCATCGGAGGTGCCTTTTCGGGAGCTGCGCCTG  
GATGGCGGAGAACACGCGTAATCCCGATGATCAGAGGGAAACGCCTGCTGAGCGA  
CATCTTGGAAGGGCCTCACTTGCTCGACCCGATCCTCATCGTGTTTCGTGTGCGTTAG  
AGCGGGCAGTTTCCCCACCAAAACCCAGCGACGACACATAGGCAGCGGGTTGGGGC  
TCCGGCAATACGATCTGTGCCGGCACTTCGCTCTGCGTTGGAATTGCCGGCGACGAG  
GCCTGCATCGCCTCTTGCTGCTCTGCCTGCAATGGAACAGCAGATGGCGCATCGTTC  
TGTGGTGCAACTCCTTGCGCTTGCTGCTCGCTGCCCTGCTCCACCGGCCCATTTGCCG  
ATGCCGGCGCTGTGGGTTTCAAGGCTTCTCGGCGCGCGTGTTGTGCCTGGGACAACG  
CTTCATCCAGGTCTTGGCCGGCAACGCCTGTTGCCGGCAAACCTTGGTCTTGCTGGA  
ACTGCCTCACGGCATGTTTCGGTCTCCGGACCATAGTGCCCGTCTTGCGGCACGGCCT  
GGCCGTTTCGGACCCCGGCATCTACTTGCTGCAAGCGATACTGCAAGAACTCGACTT  
CTTGCCCTCGGTGCGCGAGGCGCAGCCCTTCCACCTCATGCGATGACGGCGGCGTTG

GAACAGTTGCCTGAGTTGGAGTTTCCTCACGAGACGTGAGAGCTGATGATGCCGGCC  
CGGCACTCGGCGCAGCTGTGCTTACCAAGGGTGGCGCTACCGCCTCTGCCTTCGGCT  
GGACTGCGCCGGCTGTCGGGGGTGCGGCAACCTCAGGTGTTTCGGGTTTCTTGTGGTT  
CGCGTTGCGGGACAGGTTTCGGGCTTCGGTTCGGCAGGCTTGGCGACCGGGGCGCGC  
TCTTCTGGCAGAGGCGCGTTGACGGATGCAGGCATCACGACCGGAGCAGGCGTTGC  
CGTCTCCGCAACGGCAGGCGCGTTCGGGTGTGCGTGCAACGTCTCGATCCCGCTGCAC  
GTCAATGGCGGCCTGAGGCGCTTTGGTTTCATCCACATGCGGAGCGGTGACCGTCGT  
TGCGGCGAAGCTTGCGACCTGTTGCGCTTCTTGCGTGGACACACCTTGCCGATTGGC  
CTCGCGCAACGCTTGCTCGTAAGCATCGCGCTCTTGGGGCGACTGCGCGTCAATGCG  
TCGCTCCGGTGCATTGGCCGAAGGCGGTTGCTCCTGCCGAAGCGATTGCACTTCGCC  
AAGCGCCTGATGGATCTCATCAGTGCTGGTGGTTGCCGCAACACGCACCGCACCATC  
GGCGTCACGGCTCAGATGCTGGATGGGGCTGTCCACCGAGTATTGACCGGTGCGATC  
ACGCTCCAACGCCAAAGAGCTGGTCGCGGCATCAATCCCGTTTGCCTCACGGGTCTT  
TTGCACCGCAAGCTGGATCGCGCCTGCGGTCTGGGCATTGGGCGCAACGCCATAGG  
CGGCATAGGTCGCTTCGGTATTGGCCTGGTCTTGCTGCTGTGGCGTTGGCGTTTGCCT  
TGCCGGCATCTGTGCCAACGCCTGCGCGTGCTGTTCTAAGGCTGGCTGCAGGCGTTC  
ACGCGTTGCGTTGAGTTCTAACGGGACATTGCCTTCGGCAGCAACGCCGTCATGGCG  
CCACTGACCTTGCGTATCGCGCTGATACTGCTTGCCGTCCGAGGCTTGCAACGAGTC  
CGGGTTCAAGGCTGTTTGCACGGCCGCTGGCACGGGGCCGAAGTCCTCCCAGCCATT  
GCGCTGGTGGGCAGCCTGATAAGTCGCTGCAATTGCAGCTGGGCCACGGGCAATGT  
TGGCGTCCACCACCTGGGCTGCTTGTTGATCCAACGCGGCACTGCGCTCAGGACTTG  
CCGGATCAACCGTCCAGACGGGCGGATCGTTCCGATCAACGTCGTCGGCAACCATCC  
GTGACCACTGGCCATTTCGCCGGATCGTGTGCCAATCACGCGCGTAGAGATGCGCA  
GCATCTGCCTCACTGGATGGCTGCACATAAGGATTACTGGGTTGCACCTTGCCCAGC  
GCCTGCTCGGTGCTTCGCCACTGGCGTGATAGTTACAGCTCTCGCGCTTTTTCGGGCA  
GTGCGAACATGGCCTGCTTCTGCGGCGCATCCACGCCATCGTTTCGGCAGATCGGCCT  
TTTCTTGGCGCAGCCACTGGCTGGCGTTGAACTCCCAACTCACGCCCTGCTTGTTCGG  
TCTGTGTATAGATCTGGCGGTTGTCCCAGAGCGTCACCGCCTTGTCGGCAGCAGCAC  
TGAACAAATAACCATCGGCCACCACCAGCGCGACGGGCCCCGGCGCCGTTGTGCCA  
ACAACGGCTGCGGCAGCGGCGCCTCCCGCCCAGCCGCCACGCCTCGGGCACCAAA  
GTGCAGCGCTTCCGAGCGCGCAGCGGTAAGGTTGTCTTGTGCCAACAGCGTGCCAA  
CACGCTCTCCGTTTTGCGACGCATCGTAGGCGGTGCGGGCAACGCCCAAGCCCGCA  
AGCCCTGCCGTCATCCCGGCGCGACGCAAGCCTGGAATTTTCAGGTTCCGGCGTGTT  
TGGATGTTGCGTCCCTGCCACTCATCCCAACGCGCCTGACCCGCCTGGGCATGCTCG  
GTTGGCGGATTCATGCGCTGACTGAGCGGAAGCGTGCTCTGGTCTAACGCCTTTGAC  
GTTCCCTCAATGGCCGTTCCACGAAAATACTCTCTGTTATCGAGCCTCAGAACTTTGT  
TCTCGGAAGCGCATCATCACTGGCCGGGATGCGCAGCATGCCTTCGTGTTACGCG  
CACGGGCCACGATCAGCTCAAAGGCTGCTTGCTGACCGAGCCGATCTTTCACACCAA  
CCAGCGCTTCAGTGGAAGCCCCCTCAATCGAGGTGACGTTTGGATTTGCAAGAATGC  
GAGGCACTTCAATTTGCCAAAGACACGGCTTGGCTGAGCGTCGCCCACGATGGCA

TGAACTTCACCCACGGTTGCATCGGCAAACCGTCCGGAAGCATCTGCCCAAGGACCT  
TGCGTAGGGTGGTAGAGCCACTCCGTGGCAGGCCCCCGATGAGACCCCTCTATCAG  
CTCACGAGGCGAAATTTCTAGATGTCGGCGAGCGCGGTATAGAACTCGCGGGAAT  
TAAGAACTTCGATGCCTGACTTTTATCGATAACCCGGATGTCTTCACCAGAATCGA  
TCATCGATCCAATGACATCAGTCGACCAGATGTCTTTCGCTGCTGGGCCACTGTAGA  
GAACAGTGACCTTGCCGGAGGCATTTCGCATCCACCTGTGCGGCGAGTGACCGCAGC  
GATTCTGGTGTGGTAATCGTCAGGGCTCTGACGAATTCTATCGATTGCGTCCTGG  
GCAGATATCGAGCCATTACACCAAGCACCCCTCATCGACTTCAAAAACGATGTGGT  
AATCCGTGTTCTGGAATGGACGCCAAAATCCTTATATGCGAGCAAGGCCTCTTTGA  
GGTCAGCTATGAATTGCTCCTTGTGAGCCTTGAGATGCTCAGGCAGTCCATCTCCAC  
CATTGATCCACATCAGTCTCCAATGGGACCAACCAGGCTGACCTCGCGCGCCTCCAC  
CGTCGACCAAATCCAGTCTCAGTGTTAGGAGTTCGCCATGCCAATAGAAGGAAAATT  
TCGTCTGGTTTCTGACTTCAATTTAGTGCCGCCACCGTTTGCGACATTGCGCAAATA  
CAGGCCGCGATCACGATCGATTGTCCAGTCTCTTGCAATTTGTGCTACCGACCACAAA  
GTCTCTATCGATTGCTTCCAAGTCGTATTTACAACATCCGGTTCCGGAATAAATTCA  
TTTACAAATGGCATCTTCGTTTCCCGGCATGGCTTAAATTTGTGGTCAAGAGCTATTT  
TTATGAGCCCGAGACGGCGGCAGACAGCTTCTTCACC

>CONTIG\_123\_length\_4174\_cov\_4.205584

CAGTTGGTAGAGCAGGGGATTGAAAATCCCCGTGTGCGCGGTTCGATTCCGTCCTCG  
GCCACCAGTTCTAAGCGTTGCAGCGCAGGCATTTGCCCCCTTCTACCCGCTGCTGAT  
CTAACAGCCTTCCAATTGATTTGATCCGATTTTGACACCAGTTGCCAAAGTCGGTAAA  
CGTGCTGCGTCGATCGCCAAGTGTTCCGGCGACAGGTGAGCGTAGCGCAAGACGGA  
TTGGTACGAGCGCCAGCCACCCAGCTCCATGAGCGATCGCAGCGACGTGCCGGCCA  
TGACGTGCCAGCTGGCCCAGGTGTGCCGCAGATCGTGCCAACGCAGTGGCGCGATA  
CGGGCGCGCCGCTGGGCGGCCTTGAAGCCGTGGTTGTTGCCGCGGTTCGTACGGCTCG  
CCTTCGTGTTTCGGAAACACCCAGCGCGGGTGCTTGCCCTTCTGTGTGGCCAGCACG  
GCCATGGCCTGGTTCGTTGAGCGGTGAGCCGATCGCACGCTTCGCCTTGACCTGGGTG  
CCGGCGACCCAGGCCACCTTGCGGCGCAGATCGATCCGGCTCCATTCCAGGCGCAA  
CACGTTCTGCTCGCGCCAGCCGGTGGCCAGCGCAAAGAGGTAAGGCGCACGCAGAT  
GCTCGGCCAACTCGTCGTGCAGCCGCTCAGCCTCCCTGACGGTGAGCCAGCGATAGT  
CCTCTTTTGGCTTGCCGTTCTCTTGAGGCGCATCGCAGGGACATGGTTCGAGCCACC  
CCCAGCTATGCGCCGCGCGCAGGATCGAGCGAACCAGTGCAAGCATCTTTTCAGCG  
GTGCAGCGGGAGGTTCGTGCGCTCATCCTTGCGCCCAGCACGCTTCACGCGCGGCTCG  
GCCATGCGGAGGACCAGCAGCTCCGCAAGGAGATCCGAGTCAATCTCGCCCAGCGT  
TTTCTCACGCAGATGTGCATCCAGCCAGCGCAGGTTATGCAGGTCTTTGCCGAGGTT  
GCGCTTGGCCTGTTTGTGCGCCAGCCAGCGCGGCACGGCTTCGACCCAGCGTCGCTC  
GGGTTTCTCGCCTAGGCGGCTCGTGCGGTACGTTTCCGCATGCAGTTTGAAGCCCA  
CTCGGTTGCGAGCGTCCGGTCGGCAGTCCAGTGCTTCGAAATACGCGCTGTCCGCT  
TGGGTCGGTGTAGCGGACGTACCAGGTGTTTTCTTGCCGCGTGCGACGAGGATGTA

GGGGCTTCTTGCCATGGTTCACCGGATAGGTAGGCGTCGAGTGCCGCCTTGTGGAAT  
CTCCATCGGCCGCCGAGTTTTCGACCAAGGTGGATGCTTACGGGTTTTTCATCATTCCG  
CGCAGGGTGACTGGGTGGAGCTTCAGATAATCGGCGGCCTGCGGGAGTGTCATCAC  
CTCGGTGGCTTCGGCCTCAACCATCTGCCGTCTCCGCGTTACCAGGGTGGCCGACGA  
TGGTGTGTCCATGGCGTACCTCGATGCGGACTGCCGGGCGCTGGGGGAAGGCAAAG  
GCGGCCGCGAACAGCACGAGCGCCAAGCTATCGGCGAAGAGCTCGGCCGTGCTGCC  
GGGCGTCTGGTTCCAGCCGAAGAAGTTGGTCTCCAGCCACCACCAGCAGGCTGCGA  
TCACTGCAATGGGTAGGTTGCACTTCCGCATCACCGCACCTCTGGCTTGGCCTGCTG  
GTCAATAAGGTCCAGCTGCGCCGCAATCAGCGCGCAGGTGGGCACCATGGCGCCGT  
TGAACAAGATGGGGCGCTCACGCATGGGCCGGTCCTCGGCTGGTCAGCCACTTTCCG  
AAGGTCATGCCCCGAGTCCGCATCCAGGAATGCTCGATATCGGCGCTGCCCCGGCGGT  
CAGCGGCGCGGCGCGGGCTGCGCGCGCCGCCACACGCCCTCGGCGGTACGGTGA  
AGATGTCGGCGCCACCAGAGATGGCACTGCCGGTGCAGCGCTGCATGAGCCCAAGT  
TCGACCAGCTGCATGCAGGTGGGATGGTCCTTGCTTCCCTCGCCGGTAACGAAGTGA  
TTTCGGTAGCTGGGTTTTCGGCCGTGCTCTCCGGTGCCAGCGAGTGGCGCAGCACG  
TGCAGCTCTTCTGCGTCAGGTACGCATGGTTGTGCTCCTTGTCGATCGCCGCGAA  
GTACTGCGGCAGCTGTGTGAGGTCTGGGCGCTGGCCGTTGCGCCAGGCGGTCTGGTA  
GTGGCGGCCGAACCTGCTCGCGGAGCTGGTTCGCTCTCGCGTGCTTCGGGCGACTGGG  
AGGTGTGGTGCAGCTGCCGGGCGCACTCGTAGCGGTGCAGGCGCGCGGCGTTCGGTG  
ATCTGGAGCGGCATGCCAGCCAGGTCGTGCTGCACGATGGCGTCGAGACCACAGCC  
GAGGAGGGCGATAGTCATGACAGAATCGCGTCCTGACTCAGGGGGGACGATATGGA  
CTGGTGGGACGGCTTCTCTCAGTGCGCGCTGCCTAGCGCGAACTGCATCGTCAATTG  
GTCGGCATGGGCGACCGTAGCCAGCGTTGGCATCGGTGTGCTGGCTTGGGTGACATC  
CCGCACCGCTGTAAAGATTGCGAGGCAGCAATACGTCGCCGCTCTGCAGTTGCGGG  
AGGACACGGCCCCGCATTTTGGTTCGCCTCCTCATGAACGAGGTGAGCTCGCTTCCCG  
CTCGGGTGGCGATGACTATCCGCTACTTGAACGGCTCTGTTTGGTGGGCGAACGAGT  
ACAGGCCTGTGAGCGTGATCGTTAAGGGACAAGCCTTCAAGGCCCTTATCGCCGAAT  
GCCAAATGCCTATGCTCCCAATTGCAGAGCAGGTGCAAGAACGCATCCATAATTTGC  
CCAAGCACTTCGGTGAGGATCTGGCCAGCATCGTAGGTATGAGCCGCACACTGAAT  
GACTCTGCTCGACGTGTCTCCGAAAGACTTGCGCCGATTGCGCCGATGCCTGGGAAT  
TTCGCAGACGAAATGGCATAACAACGGCAACACGCAAGATTTGAAATTCTTAGCGA  
CAACCTGGCGTTGCTTTTTGAAATGAGCAAGCAGTACGCCAACGAATTCCGTGCGCT  
CGCCAACATAGAACTGATCGATTTTTTCGACGGACATGTTTTCGTAAGTACACCAAGC  
TGTCGCTACGCAGCCAACCTAGCGACGGCGACGCGCAACGTTCCGATATCTGCTGG  
GTGCTCATGCGGCCACCTGCAGCGGTAACGGCTTCGTGTCGAGGTTGGCCTGGGCGA  
GGGCTACCAGCGGCGGCGGGCTGACGCTGTTGCCGCACATGCGCACTGCAGCGCTG  
GTGCTGATTGCCCGGCCGTGAGCGGTGTGCGTGATCCGGTAGGAGGCGGGAAAGCC  
CTGCGCGCGGAACAGCTCGTGCGGCTTGAGCATGCGCAGGCCGATGTGACGATCA  
CGTAGGGCGTGCCCTGGATTACCACCGTGACCAGCGCCATGCGATCGCGCGTGGTC  
GCGGTGTCCAGCGGCTCGCGCAAGTCCACGGCGATGCCGCTACCGTAGTACTTCACC

AGGAACGCCGCGACTTGCAACGCGCCGGCCTGCTGCTCCGCGCTGAGCGTGCACTC  
GATCATCCCGTGGTGCACGGCGCCCGCGCATACCGTGCCGAGCGGCTCAGCTACATC  
CTGACCATGGGCGTTCTTGCGCATCGTCAACAGGTGCGCAGTTGCGAGCTGCTGCTG  
GCTGCCGGTCGCGATGATGGTGCTCATCGGGTCGCGCGCATCGCGGCCACCGCCTTC  
GTAGAACCCGCCGTTCGCCTGCTCAAGGAAGGCGCATGCGACCGCGTGCCCGCCGC  
TGCCGCTGGCAGTGATGGTGCCACCGGCGTGCGCGCGTCTTGCTGCCCATGCCCC  
AGCGCTGCACACCGCCCGGCCGACCTTGGCCATGACCAGCCTGCACCATGATCGGA  
GCCACCACTGCGTGCTTCACGCCCGCCGCCACGACGGTCCCGAGAGGCTGCTGCAG  
GTCGAGTGCGCGTGGTGCTTGCCTTCGCGCTCGCCGTAGCCGGTCTGCACCAGCAC  
CGGCGCAACCAGCGCGGTGTCTGCCTTGGTGGTCATCGTGTAAGAGCGGCTCAGCGCC  
GGAACGCGGCTCAGACTGGCCTGCGCGGCCACCTACACCTGCGAGGATCGGCGCCA  
CTGCCGAGAAATGCCCGCCCTTACCCCGGCGCAGATCGTGCGCAGCGGTTCTGTCG  
CGCGCATGGTGCGTTGGTTGCTGGCGTTCGAGTGCTCAGTGATGA

>CONTIG\_124\_length\_4161\_cov\_15.024294

CAGTTGGGGAAGTGCATTCCACTTGACCACCGGTTTGCATTGCCACTGACCAGTCAT  
TTGCATTTCGACGTGACCACGCGTTGCACGAGACTTGACCGGCGCACTGCATGCCCTA  
CCGGCTGGAGTCTACCCGAAGCAGGCCTTCGTAAAGGGCTGCTAACGGCCAAAAGC  
GGACTTAACGTGAACCATTCTGTGCCAGCAATTTTGGGACTGAGGAGCTGTTTACCT  
CTGCAGATAGGCGCGCCTACGACCGCTCAGCTGCGGCCGGATTAGCAGGGAGAGGT  
GTAAGCAGCGGAAGTCTTGATTACAGTAAAGGGCAGGGATCGCGCTTCGGAGTCA  
CAATGGTGGTCCGACGTATCGCCCGAGTCACGCCACCCGCAGTACTAAAAGATCCT  
GGGCGCAGATTTTTGGATCCTGCGGGGCTTTGGCAATGCGCTGGTAAAGGCCGTCGT  
AGATGATGACCTCATCGAACTCCTTCCCTTTAGACTTATGTATCGTCATCAGATGGAT  
GCCACGCCAGTCCTTCTGAGCTGCAGCGAAATGCTCCTGCATCAAGGCACTTCGGAC  
TGCCTCTTCAGCCCCCATGTACTCTCCCTGGGCGCGCCACAACGCCCCCAAATTGGT  
TCGCAATACTGAGCCTCGGTGCAGCAGTCGTAGGTAGCGAGCATCTGTTGCTACTTG  
CTTCAAGGCTTCCGCAGTGGACGATGCCAACAGGCCGCGCAGGTGTAACCAAGTCTTC  
CGCAGGGTCGCCCCGTTAATTGCAGTTGCCGCCGCAGTTCTGAGATGCGCTGAACTTC  
GCTGACAATCAACAGGCGCTTGAGCCGCGGATCTTTCCCGAGGAGAGGAACCCGC  
TAAGCGCACCCGCCAGGTCAAGCTCGGTCTGTGGGGTAGGCCTGCCCCCGCGCCGC  
CCGCGAATGTGCGAGTGAAGTGCGCCGAGCATGCGGCTCGCAACATCGCCAGCGGT  
ACCTCCCGCCAGTAACGTGGCGATAACGCCAGCGGCTAGGGCCGGCGGTTCTGCAT  
CCATTGCGACGTCGTGATTTAGTGCTGGCAGACCATCAGCTGAAGAAGAAAGGTAG  
TCAGAAAACCTCGAGCATCAGCCGCCTGGATGGCACCAGAATCGCGATCGATTTGTC  
AGGTACTTTTTTGGAGGCGATCCAACGCCGAGAACACCGCGGCCTTGGCGGTGAAGT  
GCAGGCTCTTGCCATACATGAAGTCGTAACGCGTGATTTTGACCTGCTGGTAGGCCT  
TGCCCTTGTTTGCGCCAGTGAGCAGGTCATTCCCATAGGCCGTGATATCGGTACCGC  
TGCTGCGATGATTTTACCCCGCGAAATCGAAATGGGCGGCGCCGAAGTTCTCCAGAA  
AGTCTCCACCCGCCTGGGATCAGCACCTCGAAACTCATAGATCCGCTGTTCGGGGT

CGGCCAGTGCAATGAGGCGACTGCGCTTTCCAAGCTGCTGGATCAGCGCCCATTTCAT  
CACTGTTTGTATCCTGAAACTCGTCGAGGATGATGATGGGATAGGTGTCGGAGAAG  
ATGGCGCTTAACCGATCACTGCGGCTCAGCAGTTCGCTGGCCAAGCTTGCGAACAA  
GTCAAAATGCAGGCGGCCCTCCTGTTTCGAAAAGGCGTCGCTTCTCATTTCGTGCTG  
GGCCTTATCGATATCTGCCAAATGCGCTGCTGCTTCGGGCGGTGGCAGAAGCTGCAG  
GTTTCGGTCTGCCATTCAATAGATAGGCATGGCTTCGGAGAATGCTCCATGCGAAACC  
GTGGTACGTGCTGACCTCTAGTTGCTTCAGATCCTCGCGAGAGATCAGCTCAGAAGC  
CTTTTCGATGATGCGCGCTACGGTCGGTCTGGCGAAGCTCAAGAAGAGGACCTTCTG  
GCCTGGCTTGAGTATTCCTGAGCGAATCTCATTGCGAGCTTTGACCAGCGCGACGTG  
TGTTTTGCCGGCACCAGGGCCACCTAGCGCCAGGGCGTGCCTGGCGCACTCCAGAA  
AGTCGCGCTTCTGATCGCTCCACACTTTCGTCATGCCAGAGGCTGGGGCGGGGACGG  
TTGGAACCTCCCATAGGCGGGTGCCAATGGCGGCGACTCGGCTGCCGCCTCTGGGA  
GAGGGGGCACGCCGGCTAGCTGGGGAGGTAGTGGAGGCAGCGCAGGCAGCGGAGG  
TGGCTCAATGACGTTCTTGATCGCTGCCAGCGTGGTTCTCACGTATTCAGGCATGTC  
ACTGGCGGTTGGGCAGGAGGCGAGCAAGTCGCCGGCGTCGCCACCACCCTTGGCCC  
AGCTGAAATAGCTCGACAGAGCCGCCTGCAGATCGGCCAGCGGCGTTGCGGGGCGTT  
GGCGTCCATGCCGCGAGATGCTGCGGCCAATCGCCGCCAGCAACTACAACAGCAGC  
ATAGCTGCGGAGTGCGACCTCAGACACGCCATACAACACAAGGTTTTTCGAAGCCCT  
TAGTCGCGGACTCATAGGCATGATCGACCGAGGCAGTGATGGTTGCGAGCGCCTCA  
TGTGATTGCTTGTCGAACACCGCGAACACGATCTTGCCGAGAGACCGGAAAAATGC  
ACCCAGAGGAGCGACATTGGTCTCGCCGCGAGCATCGACGATAGCCACTCCAAGGT  
TTTCGAGAGATTTGAAACGCGTGGGATCCAGCTCGGCAAGCCGGCGGGCGGCGGCA  
GGCAGTGCGTCGAACTCCGTACGGCCCTCAAGCACAAGTACGTAGCGGGCAAGTAG  
AGCTTCGCAGAACCGAGCTTTAAACTCTGTGCGATAAGCCTTGGGCTTGACTGCTGG  
TGGGTATGTTGCAGAACTCCGGTCATAACACCGGCCATGCGCTTGAGAACCACCA  
CCTGGACAGGATCGAACTCCTCCAGCACGTAGGGTGAGTGGGAAGTGAAGATGGCC  
TGTGCCGACTTCTGGCGTAGCGAATTGATAATTCGTTTCTGGGTGTGTGGCGGAAGC  
GCGATCTCTGGCTCTTCCATCGCGAAGATCACGCTTTGCTTGAGTTCGGCGATGATA  
GACAGCAGAGCCAATACCAGCGTGTTAATCGTGCCAGTGCCTTGGTGCTGATATGGG  
GCGGAATAGACGGAGCCGTCCGGCCTTTTCGCGCCAGTGCCCATGAAGACAGTCAG  
GGTTCGACGGAGCATGTGCGGGGTGAGGTCCGAAACCCGCATGTGGGGTTGCTCTG  
CCCAGTCGGATGGTACGTAGTGCCGTACTGCATCCTGGACTGCGACAAGTAACTCGC  
CGATATCCTCGGTCTCTCCAACTGGCAATGCCCTCAGTTGGTTCGAGCAAGTCTTCCC  
ACATTGTCAGTCGTGTCTCCTTCAGCCGAAGGATTACGTCCAACAACGAGCCTCGCT  
CTAGGCTGAGTGCGCGGGCGCCGGTACGTAGGGTGCGAAGATAAAGAAAACCGCAC  
TTTCGTTTGTCGGGCGCAGAGAACCGCAGGTAGGAGCCATCCGGCATTTCGGGAGTG  
GCGTAAAAGGTATCCCCAGCGAAGTCGTCCTTCTACGTCATAACCAGCCGTTGAAA  
AAGACGCGTATTGCTGCGCCAACATGGGGCGCGTCTGTTCCCTCTGGGGGAGCCCCCT  
ACAAGCAATGTCTTGCCCTGTGAATCCCACCACTCGATATGGTTCGCGGAAATGCCCG  
AGCTGCTCATCGGAGAGTCCAGCGACAACAACCTCGATCTGGATCGGGACGACCTC

GTTCTTGTCCGGATCTACATACGTACCTGCATAGAAATCGTGCTCATCAATTACAGG  
ACGGCGACTCAGGCGCTCCGGGCCAAGTACCAGATCCACCGCCTCCAGCAATGTGG  
ACTTGCCGGCGTTGTTGTCACCAATAAAAGCAGTGTGTCCATTGAGATGGACCTCAC  
CGTAGGCGATGCCTCTGAAGTTCCGGACGCGAACACGCACAAGATACACTTCGACC  
CTCCTTGACTAGCGGAAACCAATCTACTGATCCTAGTACCTCATGGTAGGTGCGATT  
CGACTGTATCGCCACTTGAGAGCTCCTCCGGGTCGATTCGCGTACCGCGCGCGCAAC  
CAAGGGCCGCTACTGACCGATTTCTGCCGGTCAGGGTCGGCCAGCGGACTGGTCAA  
ATCCGATGCAAACGACTGGTCAAGTCCATGCAATTACTCACAGTAAAGCGAAAAGT  
CCATCCCGCTATGCTGCGGTGAAAGCCCATTACT

>CONTIG\_125\_length\_4054\_cov\_14.500637

CCCCAAACCATTGCTGGATGCTGGTTTCCTGGATTTTCATTGAGGACATCAAGGCTAC  
TGGCCATCCCAGACTCTTTCGCGATCTGTCTGCGGGCGTGAACCGTGAGACTGGAGA  
GACCAACGCGCGCGACAGCCAAGGCGCGGTGAACCAGTTCAGCAGCTACATGAAGA  
CCTTGGGCTTCGGAAAGGGCATCGGTGCTCATGCGTTCCGCCACACGCTCGCCACCG  
AGCTTCACCACAAGAACGTGTCCGACCAAGACATCGCCCTCATTACCGGCCACTCGT  
TGCGGAAAAACGTCCCCGTCTTGACGACGCGTATTTCCACAAGAAGCCCAAGCTC  
GCCAGGGCCACGCAGATCAGGATCCTGGCGAAATACAAGCCGCCGGTCGAGTTGCC  
CAAGTATGAACGTGGCCAGTTCAAGGAGAGCTTGGCAGATCCGAGCAAGTTCTATC  
CGTAATACCGACCTGCGTCCTCCACATGTATCGGCTGGGCGGGGGTAGATAAAGCG  
CACAGGAGAGCCGCGTATGTGAGGCCACACGATCGCGCTTATGTGCTCCACGTTTGC  
CCATGAGCTCGGTTTCCATGCGTTACGACATGCTGTCACCAAGCTCAAGCATTTCCA  
TTCCCTGGGAGGACGTGGCCACCATTGCACGAAACTCCGAGAACAACCGCTTCCCTG  
AGTTGAACCTCCATCCAGCTACGAAAAACCCCAAAGAGGAGGCCCATTAGGAGCGG  
TGCTCCAACGGTAGCAGCTGGGTAAGGAGGCAAAGTTCTACCCCTAGATTTTGGTGT  
TGTCAGCTGGCGGGCTAAGCCACCCCGTTGCCGCCCCGCCAGCCCAAGGCATGATT  
CTGAGGCGGTGACTTGGCCGTATGGAATACGCTCAGGGGGAGCGACAATATGCGC  
TTGGAAGCAGTCAGTATCTCCAACCTTCCGCTGCTATGGCGAAGAAGTCCGGGTTGAG  
CTCGACGACTTAACGACGTTTCGTGGGTCGAAACGATATCGGCAAATCAGCCATCCTC  
GAAGCGCTGGAGATTTTCTTCAACTCGGACGTGGTGTCTATGGAGCAGGGCGACGCC  
CACGTCCATAACGCCAACAAGATTGTGTGCGGTCACCTGCGAGTTCTCTGAGCTGCCA  
CCGACACTTACGCTAGACGCTGGAGCAGATACAACCTTGGCCGACGAATATCTGCT  
ATCGCAAGATGGTCGGCTGAAGATTTCGGAATCTTACGATTGCGCCAGCAAAAAGC  
CATCTGCTGATGTATTTGTCTAGGCTTCCACCCCACTGTTACGGATTTTCGACAATCT  
TCTGGAGCTGAAGGAGAAAGAACTTCAGAAGAAGGTGAAAGACCTTGGCTTGGAGG  
TTCCTCTGAAGGGCAATCCCGGTATGCGTCGCGCTCTATGGGGTGCCGCAAGTGAAC  
TCAAGCTTCAAGAGGTCGCCATCTCGGTGGGCAAACCCAAGGAGGACGTCAAGCGC  
ATATGGGATCAAATCGAGCCGCACATGCCCATGTTGCGCTCTTCCAAAGTGATCGG  
AGCAGCCGCGACTCCGACACTGAAGTCCAGAGTCCGATGAAAGCGGCCGTAGCTGC  
CGCAATTGCCGAAGTCCAAGACGACATCGCTCGAATTCAGGCGAAGGTCCGAGAGA

AGGCAGAGGAGATCGCTAAGAACACGCACGCGGCTTTGGCCACTATCGATCCCAGT  
CTTGCAAGCGAACTGACGCCCCGAGTTCAGCCCCCTACTCCCGCCAAGTGGCAGGG  
CCTCTTTTCGCTGGGTCTAAACACGGACGACGGCATCCCGCTGAACAAACGCGGTAG  
CGGCGTAAGGAGGCTTGTGCTGGTCAGCTTCTTCAAAGCTGAGGCCGAGCGCCGGCT  
CAAAACGAGCACAAAGCGCAGCATTATCTATGCGATTGAGGAGCCGGAACCGCGC  
AGCACCCCAACAACCAACGCATCCTCATCGATTTCGTTCAAGTCGCTTTCCGAGGATC  
CAGGCTGCCAGGTCATCCTGACCACTCACAGTCCCGGGTTCGCTTCATCGCTTCCCC  
AAGAAAGCATCCGCTATGTTTCTCGCCACACCGATACCAAAAAACCTCAGATCGAA  
TCGGGCGTAGACGTGTTTGGCAGGGTTGCAGAGGCACTGGGCGTGACTCCTGACAG  
TCGGATCCAAGTATTGGTTTTCGTGGAGGGACCTACCGATGTCCTCGCAATAAAGGC  
CCTATCCAACGCTCTCCACGAAGCTGACTCAACATTGCCAAACCTGGGCACTGATTC  
GCGCGTAGCGTTTGTCTCTTGGGAGGGGGAACGTTAGAGCATTGGGTCAATCAGC  
ACTACCTGCGCGGCCTCGGAAAGCGGGAGGTGCACATCTACGATGGAGATGTTCCG  
GCCTACGCGGATAGCGCGGAGCAGGTGAACGGCCGAGGAGACGGGTTCATGGGCCG  
TGATCACCATTAAGCACGAGATCGAGAGCTACCTGCACAAAGATGCCATCGCGTTG  
GCATTTGGGTTTGAGATAGAGGTGACGGACCATCCCATAGAAGGAAAGGCGACACC  
CAAGGTCTTTGGTGAAGCATTTCGCGGCACAACGAGGTCATGGTGCCCCGCTCGGTGA  
CAAAAAAGCCAAAGCCAAACTAGCAGACCGAGCCTTTCCCCGCATGACCTGCGCCA  
TGCTAGATGAGCGCGATCCTAGCGGCGAAGTGCGGGACTGGATGCGACGCCTGGGC  
GGCATGTTGGCCTGACTTGCCAACCGCGACGTGTCACAATAATCGATCGGCCGGG  
GAGCGCTTTAGTTCCCCGGCCGGCTAACTACGTGGCTATTGTCAGGACCAGTGAAGA  
AATTTCTTCCGACACATCGCTGCTCACTTATCGATGCGAATCTTACGAACAGCTATTT  
TAGAGGGATTGCCGTTTCGATCCCACGCCCCGCTTCGCCACCCAAGGACGATTGCGGG  
CACGACGATGACGGGAAGACCCCAACAAGAACGCGAGGTAGAAGGCAGCAGTAGCG  
ACCTCACCGTAGACCGGATGTTCCGCGAACTTCCAGCCAAGCACAGCGCAAGCCAT  
GACGGTAGCAAGCCCCACCCCGCCACCCACGAGCGCACCTTTCAGGAACCCGCCTTT  
GCGAAAGTAGGGAATGCGGCCGGTCCTGACATGCCAAGCCCAGACCTGCTGGGCGC  
GAATGTGCAGCATCAGGCAGAACACCAGGAAGCCGGCGATCAGCAGTCCACCTGCG  
CAGTAGACCAAGCCCATCAGCTGCTGGGTCTTGAAGACAGCGTCGAGGCCTGCTCC  
AAACAACAGCATGCCCATGGGTCCGAGAATGACGCAGGGCAGGATCATGGCAGCG  
GGCCCCGGTCGGCGCATAAAGCCGCTGGTAGTTTCGCTTGGTGGTTCATTTCTTTTTCTC  
TGTTAGGAGTAAGACCAAACGGTGTACGGCAACCGCATGGCAAGTGGTTGGTCGA  
GGGTCAGCCCGCAGATGTTCCGTCATCGGTACAGTCCACCAGTTCCCAACCTTCGCC  
CGCCTGCCGGAACCTTCATCGTCATCTTTAAGCGCATTTCCCTTGGCCTTCGGCGTCATA  
GGCTGATCGCCAATGAAGCCCAGTCCATCGACGCTCCCGGAGATCCGACACTCCTG  
ATCACCGTTGGGCAGTTTTGTGCAGGCGATCTCCAGCCCGCTCGCTTCCTTGACTTCG  
AACCGCCAAGTCTGCTGAAGCGTTGCCTGCCTCCCCTGCTCATTAAGAATCGCTCT  
ACTGCTTTGACAGCATCCTCCTTGCTCGGCGCATGCTTTGCACCACAGGCCGACAAG  
CCCAACGCCAAGAAGGACGCCGAAATCCAAACACGTTGAATGGTCCGCATCACGAC  
TCTCCGTTCTTCTGTTTGGTCAGGTCCACCCCGATGACTTCGTTTCGGTAACCCACCT

GGACGCGTTCGACGTCCACCTCGGCGCGCGGGCCTCCGTTCTCCAACCAGACCCGCT  
TGACGGTGAAGACCACCAGATCGTCCCTGGCATCCCTGCCCTGCTTGAACAATCCGG  
TGGCCTCGCTTTCATCATGCGGATCGGAAGATGAAAGT

>CONTIG\_126\_length\_4003\_cov\_29.695562

TCACGTGGGCACGTGGCCACCTCCTGGAGCAAGTGGCCCCACCGGGATACGACAAA  
GCGTGGGAAGCATGGAATTTTGACGTGCTGCCCATGATCCCCAGCGCATGGAAGCA  
CAAGCCGACTGCTGACAAGGAGCGTGAGCTGGCCGTGCTGCTGGCCAACATCCCCA  
AGGCGACCGAAATCATCATCGCCACCGACTGCGGAGCCGAGGGCGAAGCAATCGCC  
CGTGAGCTACTGGACCACGCCGCCTATCGCGGACCGGTGCGCCGGCTGTGGTACTCC  
GCGCTCGATGCGGCAAGCCTCACCAAGGCCATCGCCAATCTGCGGCCAGGGGAAAG  
CAGCGAGCCGCTGTATTGGGCAAGCCAGGCACGCTCGCGCGCCGACTGGCTCATGG  
GCATGAATCTCAGCCGCGCGTACACCCTGCGATCGCGTGCCGCTGGCGGGAAAGGG  
CCGCGCCATGTGGGGCGCGTGATGTCCCCACCCTCGCCCTGGTCGTGCGCCGTGAT  
GCGGCCATCGAGGCGTTCCGCGAGTCGACCTACTACGACATCGAAATCACCGCGCA  
AACAGCGCTCGGCACCAGTGTGGTGTGACGCATGCGCCAGTGGATGAGAGCCGGA  
TCTTCGCCCCGCGCCGACGCCGAAGCCATCGTTGCGGCTGCCACCGGAGCCAGCGGC  
CCGCTCGCTGTCACCCACGACGCCAAAGCGCAGAAACCTCCCTCACTGATGACGCTT  
TCCCGCTTTCAGCAGCTGGCATCGCGTCGGCTCGGGTGGAGTGCCGATAAGACCCTG  
GACGTTGCGCAGAGCCTGTACGACAAGGAGCTGACCAGCTACCCGCGCACCCCGTG  
CGCACTGCTGCCAAACGAACAGGAAGCGGAGATCCCCCGCGTGCTGGAAACCCCTTG  
CGCAGGTGCCCGGCCTAGCGCGACACGTGGCGGCCTTGACCGTGAACAAACCCACC  
ATCCGGCCAAGCGTGTTCAACAGCGCCAAGATGGCAAAAGACCACGCAGAACACCA  
TGCCATCGTCCCCACGGGCGTGCCGCTCGCCAGTCGCACGGTCAGCGATGACGAGC  
AGACCGCCTTTCTGCTGATCGCCCAGCACTATCTTGCTGCGCTGCTGCCGGACTACA  
CGTTCAACGAAACACGCATGACGCTGGAAGCTGGCGGCGTGGCATTACCCGCGAGC  
GCTCGCATTTCCCGTCGATCAAGGTTGGAAATCCGTGTTTGGCGCGGACCCGGACAAC  
GAGGACGAGGACGAGGACGACACGGCATCGCCAGTGCTGCCGGACATCAAGGACG  
GCACGCACAGCACGGTCGCTGCGGCCGCACTGCGGCCCAAGAAGACGCGCCCCGCC  
AAGCGCTACACCGAAGGCGACCTGATCGCGGACATGCTCGATGTCGGCAAGTTCGC  
CACCAACCCCGAAGTGCGTAAGCGCCTCAAGGAAAACGCCGGCATCGGCACCGAGG  
CCACACGCGGAACCATCATCAAGAACCTGCGCGAGCGCGGCTACCTGGAGTCCAAG  
GGAAAATTCATCGTCAGCACGCCGCTGGCGCGTGAGCTGATTGCCATGCTGCCGGC  
GCCGATCACCGACGCCGCCACTACTGCGTTGTGGGAGGAAAAGCTGGACGAGCTGC  
GCCGTGGCTTGGTGCCGATCGAAGCGCGCGACGAGTTCGTTTCCAAGGTCGCCGCCA  
ACGTCACCCGCATCATCGATGCGGTGCGAGGCGATGCGACCAAGGCTGCCGCTAGC  
CGCGTGCCCAGCGAAGGCCAGCTGCGCTATGCCAGCTCATCGCAATGGAGTTGGG  
CGTCCCGCTGCCGTCCAACGCCGTCAGCTCCACGTGGCCGTGCAGGCGTTCTAGA  
TGCCCACAGCGCCACCTACGGCAATTTGCCGCCAGTGAGAAGCAGCTGGCCTACG  
CGGAGAAGCTGGCCGCCGAGAAGGGCGTGACCTTGACCGACGAGCAGCGAGGCGC

ACGTGCCGCGCTGGGCGCATTCCTGGACCTACACGCGCCCAAGAAGCCCAAGGCAT  
CCCCCGCCAAGAAGACGACCACCAAAGCCGCGAGGAAGCCGAAAGCCAAAGCGTG  
ATAGATGCCTTGTTGCATGCTTGCATGCAAGCATGCAAATCGATAGAGTGACTGTGT  
ACACACATTGCACACCTAGCACACCTAAGCACACGCGAGGAGATTGAGATGGCCGTT  
ATTTGCCGCACCCGACGCTACCGGGGCAGGTGCTAAATGAAGCTCCTGCGCCATCCT  
GCGTTAGCGCTGGTCAGGGGCATGATCGCAGCCGGTGGCTGCTGGCTAGCGCCGCT  
CCCCCTGATCTATCCGATGGTGACCACTGGCGAGTGGTCAGTTGCCCGCGTGTTGTT  
TGCGGTGCTGTTTGCAGTGCTTGGCCCATTGATCGGTGCGGTGATCGCACGTGCCGC  
GCTGGCAAGCTGGCGCGATCGTCACCTTGGCGCGTCGCATCCGCAGCAGGCCTAAC  
ACAGAGCGCGCAGGGCAAGTTCCGCTGCCGGCCTGTTCCCAACGCCCCGCCTTGATG  
CGGGGCTTTTTTTTGGCGGCGTTCCGGTCAACTGGCGCGGTCTGGCGCCAGGCGGCCA  
ATAAGCAAATCGTTTCGGTACACGTACAACAGGAGGACCGTCGCTCCACTCTTGCGT  
TGTTCCCCGTCAAACCGCGCCTGCGTGCGTGCGGTGCGTGCACGCTGGGCACCCCGC  
CAATGGCATGCGCACGCTGCATAGCAACACACACACGCTACTAGCGCCTTTTGAC  
AGAGTTCGTCTCAATCGGAGATTGACGGGCATACAAGTACCCATATAATGGGCCGT  
GGCAGGCCTTTCGCCTGACCACCAATCACCTACTTACAGGAAAGCCCATATGAGAG  
CCGACAACTCAGGATCATCACTAGGAATCAGGCACATGCACGAGAACGACAGCAG  
CAGTAAATCGTCGCCACAGGTCAACATCCTCGACCTGGACGACAAGGCGGTGCAGC  
GGGACATGAACGAACTCCCGGAGGCCATCCGGGATCGGTTCTTGGCAAGCTTAAGG  
ATGGTGCTACTGGGATTACCCCTAGTATTACGTCAGGAAAAGCTACATTCAGCAGGC  
GAGGGTGTGATCGAGCTGAAGATCAATGGCCGCCCCGCATATCGCTGTATGTATGCA  
ATCGCCAAGAATGGCGATGTGGTGGTGTACATGCAACGTCCAAGACGGCGCAAGG  
TCAGGACAAGCAGCTGGTGAAGACGACTGCGGAGCGGTTCAAGCGGCTGATGCGCG  
GTAGGTAAGAGCGGGGAAGCAGGTAAAAAAGGCGATGTTACAGCATCGCCTTTTT  
TAATTTCAATTCAGGCGCGGTTGCGCCTTGTCGTCGTCCGGGAAGTCGAACAGGTA  
GTCGAATGAGTAGCCGGCCCTGAACATCATTTCCAGCAGGGCATCCACCGAGAAGC  
GTTCGAGCTTGCAGCGCATCAGATCGCTGACGCGTGGCTGTGTACCTTGAGATGAT  
CGGAGGCGGTGACTTGATTCCAGCCTTTGGCGCGGATCAGCTGGATCAGGGTGATCC  
CCAGCTTTTCCTTGAGATTTTTCTTGTGGTACTCGGCCGGATCGGCGGAGAACAGTG  
CGTAGGGATTGTCTGTATTCATAGTGGGTACCTCTCCAGGGGCGACTGGAGCCTTGG  
GCGCGGCGCGACCAGGGCAAGGAGGATTTTCAAGGTGTCTGCATCATCTTCGCTAG  
AGCGAAAGTGGATGGGAAATGGCTGTCGCCATCGAGTTGACGGACTATATCCGTAC  
TTGTATCTATTAGGCAACAAGTAGCTAGTGAGCTTGTCCACAAAAAAGAGAACAAG  
CCGCCGCCGTGAAAGCCTTGCGCCACAACGCTTTCCGGCAATGTGCCCCAAGGCGCC  
GACCAAAACGGTGTAGGAATTTTCGTAACACGACGGTAGGGGAATGCAGTAGCGGCG  
CTACAGCGGCGCTACTGCGTGGAATTGGCCGTTATGTGCGCTGGCGGCCTCGCCGCG  
AGAG

>CONTIG\_127\_length\_3992\_cov\_199.953946

GCCGCCGCATGCGGCGCGATCGGCGTGGTGCGCGACGGCGACAAGATCCTGATCGA  
CATCCCCAACCGCTCGATCAATCTGCTGATCTCGGACGAGGAACTTGCTCTTCGTCG  
CGCAGAGCAGGATGCCAAGGGCTGGAAGCCGGTGGAGGTGCGCCACGCAAGGTC  
ACCACGGCGTTGAAGGCGTACGCGCTGCTGGCGACCAGTGCGGATAAGGGTGCGGT  
GCGGGATAAGGCGTTGTTGGACGGCTGAGCCGTTACAGCGTTGCACCGGCGGGCGGC  
ACCTGTCGCCGCATGCGTGAAACGCACCGGCAGCGGGCGGGCTTGCGAGCCAAAGCG  
GCAAGCGCCTCTCACCGGCATGGCAGCCTCACTCGTCGCCAACCACGCGGGCCCAGC  
CCATCCAGCGGACTGCGCACCGCAGACGCACCGCGGGCCCAGGACATGCGTATAGAT  
CTGCGTGGTGGCCACGTCCTTGTGACCCAATAGCTCCTGCACCGTGCGGATGTCGTG  
GCCATCCTCCAGCAGATGGGTGGCGAACGAATGCCGCAACGTGTGGCAGGTGGCAG  
ATTTGGCGATGCCGGCACGCCGTCGCGCCACTTGCACCGCACGCTGCAGGACTTCCT  
CGGACACGTGATGGCGACCGACCCGGCCACTGCGCGGATCGCGCGACTGGCGCGCA  
GACGGAAACAGGTATTGCCACCCCGGCTCGGCGTCGGCATTGGGATACTTGCGTGC  
CAGTGCAATGCGGCAGGAAAACCCGTCCGGTACCGGCCGCCAGATCGGCGGCATGCA  
CCACCAACGCCCCGGTCGCGTTGCCGTTGCAGCGCCTCACGCAGGCTGAGCGGTAGC  
GGCACCCGGCGGTCCTTGCCGCCTTTGCCATCGCGCACACGATCTCGCCGCGCGCG  
GCGTCCACGTCCTTGATGCGCAGCCGCAGGCACTCCATCAACCGCATTCCGCTGCCA  
TACAACAGGCTGGCCATCAACCAACACGGACCCTCCAGCACTGCCAGCAGCCGTGC  
AACTTCCGCGCGCGCGAGCACGACCGGAATGCGCCTCGGGCCGCTTGCGCGCACCA  
GGTTTTCCATCCACGGCAGCTCGATGCGCAAAACCTCGCGATAGAGAAACAACAGC  
GCCGCCAACGCCTGGTTCTGCGTGCCCGCAGACACCTGCCCATCAGTAGCCAGCCGG  
GTGAGAAACGCCTCGACCTCCGCCTGCCCCATCTGCGCCGGATGGCGCTTGCCGCTG  
GCCAGGATGAAACGCCGGATCCAACCTTACGTACGCCTGCTCGGTGCGAACGCTGTA  
ATGCCGTACGCGCAAGCGGTGCGCGCGCCTGATCCAGGTGCCTGACCGAAGGGCGTG  
CTGTTACGCCGTCGTTTTTCTGGGTGTCTCATCCGCCTGCGTCCTTGCTGGATAACGC  
TAAAAACATCCGTATGGTCGCGTCGGCTTGCCATCGTGCGACCCCGTGATTGCGGCT  
AGGAGCTCCTCCTTTTACAAAATTCTTGCAATCGAAGATACTCGCCGTAACACCGCC  
TTTTGGCAGTCCAATAGTAATTAGGGGGCAATGGACAGTTCGTGGCGACGGGGAGA  
GTGAAACATGAGCGTGTTTGAATGGATTGTTGTCGTCCTGCTTGTTCTCATCTTGTT  
AAGCCTAACGGCAAGCCCTTCCGACTTGAGGGTACTGCCTTAACTTGATGCAGCAG  
TATGAAAGTCGGTTGATTGCCATCGAGACACATCTCGCGGAGATTGACGCATCAACC  
AAGTCGGCCAGCAACGACATAGGCGCCATGCGCATTGCTCAACTTCCGGACTATCCT  
CCCGATGGCCCTTGAGTTGCCACCTAACAATTCAATTCAAGCCGAACCCGCTTCGCGG  
GTCGGCTTAATTCAGACGTTAGGCCACAGGAGAGAGATTATGGCGATCAAGAAGAT  
CCATTCCCCCAAGCCACCTAAGCCGCCTGATCGCCTACAAAACCTGCAGACCTTAAG  
GCCTCTTGGAAGACCAAATGGGTCCGCGCTCACTGGCGCTGGGATTACTCCACACA  
TAAGTGGGAGTGGGTGCTCGGTCACTGGAGCAAATGAAATGCGAGGCGTGCCATGG  
AAAGAGAGCATACGGTTCAAGTTTGGGACCAGCCCCAGCAAGTCACTGTTTACCAA  
AATTCCAAGTCTGTCTGGATTGCCGTTGGCACTTACATGGGAGAACGAGTAGAGGTA  
AAAGGCCGCAGCGAGACTCAAGCAATTGGCAATTGGCGAGAAGCCGCTAGATATCG

AGGCGGCTAACCATGCGCTGGCATAAGTTGCTGTGGCCTAACAATTCATTCAAGCCG  
ACGCCGCTTCGCGGCTCGGCTTAATTCAGGCGTTAGCCTTCACACCCAATCTTCCGG  
TGATCATGGACAACTACCAACATCCTAAGCCCGGAAAGACATACATAAGCTCTGCG  
CTTCCGGCTTTCGGGGACAAGACTCGTCGAGTGCGAATAGCTTCGAAGGTTCTGCCC  
TCTACTAACGGTTACGAATACGTCAAAGAGCGCGATGAAGTTGTCGTGCGGCAGAA  
GCCCCGACGCGGCCACCCACATCAGAGCAAAGTTCCTCGAAGACACCAAGGGTGTTT  
TCGTTCTCACTATCCAGAAGTTTTCTGCCGACACCGGCATGCCTTACGGCGCCGGCT  
TCTCATTTGTTGGAGAGGAGATTGGTCGCTTTTGCGAGTTCCTCGCCAATATTCAGTC  
CGTTAGCCTGGAACAAGGCGGATCGGTTAATATCTCGGACGCTGAGTTGCGCAAGA  
TTGCACTTACGTCATGGCAGGCAAAAGAGCTAGTAACGGATAACGAAGAGCTCATC  
GCAGAGGTGCTGCGTCACTCCGTTACCAAGAACGATATCGTGGCACTCGGCTATCGC  
AAAAGACAAATAGACGTCTTTGGCAAGCTTCTAGAGAACGAAAGTTACTTCAATGA  
CCTAAAGAAGAAAAAAAAGTGCAAGGATGAAGCGCTGTGGCAGCAGTTCTTCGAGG  
CAAACCCATGGATATTTCGGTTACGGTTTGAGCTATATCTATTTCGTGCGGCCTCGAGG  
ACAGGAAACTTGAACAAGTGGTCCGCGGTTACCAAGTCGATCAGTCTGGGAAGCGC  
GTCGATGCGCTTTTAAAGACGAGGGCGCTAGCTTCAACGCTGTGCTTCGTAGAGATT  
AAGACCCACAGGACACCTCTACTCACGTCCTCCGAGTACCGGGCCGGCTGTTGGTCA  
CCATCAGAGCATCTTTCTGGCGCAGTAGCGCAGGTACAAGGCACCGTGTGCTACGC  
GGGAGAAACCATTTTTTGGAAGCTTCAGCTCACGGATAACCACGGTTTTCCACAGC  
AGAAGAAGCCTTCAACTTCTCACCTAGATCGTTTGTCGTTGTCGGCACGCTCGCGCA  
GTTTGCCGGCGAACATGGCGTAAACGAGGCCAGCTAAGGTCCTTTGAGCTTTACCG  
TCGCAATCTGCACCAGCCCGAGGTCATCACCTTTGATGAGCTCTATGAGCGCGCCCCG  
CCACATTGTAGGCGCCAGTGAAAGCTAACAATTCGTCCAAGCCGACGCCGCTTCGC  
GGCGCGGCTTAACTCAGGCGTTATGCCTCACTACAGAGTTTCCGCCGCATGAACACT  
TGATGACAATCACCTGCGCCACTTGTGAGCAAGACACTGATTGCAGAATTGGCTAC  
TCCAACCGACTGATACAGCCAATTCAATTTGCGTGCCCTCATTGCCATTCAGCTGTA  
GAGATCACCTGGACACATCAGAGGCGCCACGCTCAAACCTTTACTTTCAAAGGGTGT  
GATCCATCCAAAAATCAACCGACCGGGCCATTCGATGGTACGAATCCATTCGTTGAC  
CTCCATCTCGATTTTCCGGGGCGGCTTCAACTCCGATTCGCAACACCAACGGTTGTG  
AAGTGGCCCAGGCGACCTGACTTGAGCGACTTCACCGCCAAGTGGAGTTGCCCATG  
TCATCCAGCCGCCTGGACCAGGCCGAACGATAC

>CONTIG\_128\_length\_3955\_cov\_8.130355

GCCTTCCGGCTGGTGTGAGTTACCCCGATGAATCTGCCGTGCGGGAGTGCCTGAAAA  
GTGATCGTCCTGGCGCGGCAGTGCGCTTGCAAGCCGAGCAAGCCCGCCATGATGGC  
TTTGATGCAACTCCATCGCTTCGATTGATCGACAACCAATCCAGTCGTTCTATTAATC  
TTACGGGTCCAGCCTCGGGAGATATGTTGCTCTCCGCACTGGATCTACTGAGTCTGC  
CTGAGAGCGACAAGGAGGATGGAGCATCTCCCTCAATATCTCGATAGCTCGTACGTC  
GCTCGCAGACTTATGTATTTGCAGAGTTCAAGGGTTGTCAGTATCGAAGTTCGTTGT  
GCAATAGATTCTGATTGTTCCAACAACCAGGACTCTCGCTATCAAAGAATTCAACGC

GTACTGCCCCGAGCACCTCTTGAAGGAGCGCATAGACTCGGTTGCAATAGTTTTGGT  
CGTTTCGATATACAGAGACAGCGACTCGCCGAATGCCGGTAAATCGCATTCGACGC  
AAGATATGAAGGTCTTGCTCCCACAAACCCACCCGTAAGTACGAGGGTGTATCG  
CCGAGAAGCCAGCACTTCACGGTATATGGTGGAAAGGTAGTAGCTGTTCTGAATGG  
CACTAACTTTTTGCTCCCGAGTTCCTTCGCTTACGAAGAGCGGGACTACAGTCTCGG  
TTTGCCATAGATTCAGAATGGCCTCTAGGAGAGCTGCACCATCGCTGTGAATCTTAT  
GCTCCTGCTCAACCCGATCGCGACACAGAACCAACTGCCGTGTGGGTAGAACACC  
AGCGTGGTGGATAGCCGCCCTCGAATAGGCGTCTGAGTCGAAACCAGTTATCTTGA  
AACAAACCTCCTGCCCAAAGCAATCCTTGATCTCGTGGCTATAATCACTGTCACGT  
CCATGCATCATTGCCAGTAGACGATAAGGTCGTAATTCAGTGAGGCGACGGTATCG  
AAATGTCTAAGAAATTGGTAGATGGACGGCAGATGACCACTGACCTGATCGAACTC  
TGGATGGATTGCACGCACACTCTCTATAAGACAGTCTCGGACTCTCAGGTATGCCGC  
ATGCGTCCCTCTCATCTGGGATCTGCAGTGATCGATTGACATTGGATGCCTGCCAGAC  
GATCCGCAATATCAGTTCGAAGTCCTCAGTCCCGAAGAAATCAAATAGCTGCTCTAC  
ATCCGGAGCTATCAGCTCGTTCGTACGCGCATGTTCCAGCAAGGATTGGTAGGAGAA  
GCTGCGGCTTACTGCAATGCTTGCGCCATTGCCTAGTATGAGTGTCCCTCGGTAGTT  
ATTGGCAATGGCCTGCCATTGCTGAATCGCATAGGGCATGAGTTCCTTCTCCTGGTT  
ATTTGTATCCCGCAACCATAGCGCATGCCTGTGCGGACAACGACATTTGCGACAAAG  
GCGATTCAGGAATGCGGGCATGCCGTCATACCCATTCTTCGTGGCATGTTCTGGGCTG  
CATGCATTGGACTACATGGGTCTCCAAGTCCAGGCAGCATGCCATGCGCAACCTCT  
ACATTGTTTTTCGGACACGCGCTGTTTCGGACTGGCGATGCTGGTTCCGGGGAGTTCCG  
AGGCTCAAGAAGTCTGGGTAAATCAGTGACTCCAAGCACTCTGTGACTGGCAACGCG  
ACCGTCGACCGACGCATAGAGTTAGACAAAGCCCAGCAGCTTGAAATCGAGTTGTC  
AGAGCAGCTTCCAAGCGACCCCCAGCGTGCCGCAGCGCTGGTACAGCAGCGCTTAG  
AACGCGGTGGCCAAGCCCTGCAACAACGCCCTTCGCAGTGCTTACCAAGACGTTACC  
GACGCCTGGAGTTTGGGCATCGCCACGCTCCCAGCGGTTGTTGTGGACCAGAGTTAT  
GTGGTGTACGGGGAGCCTAACCTGGACAAGGCACTTGCGCGCGTAGCGCAATACCG  
TAGGAAAACCTCCATGATGGCTCGTGTTCCACGTCGCCTACGAGTGGGTGCCGCTGCG  
GCGCTGCTGTGCGGTGCTACGTGAGCTTCGCTCTGAATACGGCCAGCATCGTGTCA  
TCAACGCTTTCGCCAGACTGCCTGGAGTATCGGGTGGTGGGCATTTGCTATTGGCTT  
TATTGCACGTTGACGGGGTGCACGGTTCGCACCTCAATCAAAGTACGTCATTACGTT  
CCAGATGCTGTGGTCTCCAGCTATTCCAACGTCGGTGAAAATCCCTGGCTTGAAGTG  
CGTGCGATGAGTAAGCCCAACGCGACTGCTCGCTCTGGAGGAGATGGAACAACCAA  
TCATGACAACGAAAACAACCTGATCAAGTTCAAAAACGCGGATGTGATCGGCCACC  
CCGGTGGGCAGGTTTTTCAGTCAATTCGCCAGCGCATCGGGTTATGCGTGCGAAGGTG  
CTGGTACTGCTTTCATGCCCTACTTGCTCAGCACCTTGGATACGATTGCATGGCGCTA  
CAACTTGCCAGAAGTCGTTTACCCCGAAGCGCTCATCCCTGGCATGCGAGAGATAG  
GCTCTCGTACTGGCATGAATTTGTGGGGCGCCGTCTACCCCGCGGAGGATTTCTGC  
ATCAGGCCGATGACTACAAGGCCGGCGCTGTGGTTGCGCAACGCGCAGGCGACATC  
GTGACGCGTCGAGGCCAACTTCACGTCTATCAGCCCCTGCTCGCCAGTAGTCGCGAT

GGTTATTGGCCGGCTGGCGAGTTGGTAGAAAGCGATGCCTCAACAGGTAAGTGGCA  
GCAACTCACACCGCGCCTGTCCTCTACCTGTGCGGTATTCCCCCAAAGCGGCTTGCT  
GCCTCAGGGAGAGCAGGGCGACTACGCGTGGGCTTTATGGCGCCCTTACAGCTGCT  
GCCAGCGTCAAGGTCAGGTCTTCCTGGGCAGCGTCGATTTCAACTAAGGGCACGTCA  
ATGAAATTCTCTCGTGAAATTTCCCCACTTCACCGACGTCGACAGGGACATTTCGCGC  
CTTGTTTTGCTGACGTGTGCACTTGGCCTTGCAAGTGGATTTGTCTGGGCTCAGAGCG  
GTGGCTTCCAGAACAGTGGAAGCGTGATCGGCGATGAGGTCATGTATTCAATCGGT  
GGCGGCAACGCCGTCTCCATGAGCGGCGCCGCTGGTATGCGCTCGATAGGCGTGGG  
CGCTGGCTGGAACAGCAATTTGGTCTGTGGGGATATGAATATCAGCACGACGATTCA  
GAACCAGCTCAATGGGCTGACGAATGGATTTCAGAACATCATGGGTAACGTGATTC  
AGAGCGCGACGAGTGCCGTCGCGTCGCTGCCCCGCCTTGATCATCCAGCGCGCAGAC  
CCTGGTCTGTACAACCTGTTGACCAATGGCGTGCTACAGGCCCCGCCTGGACTTTGAC  
CGTTCCAAACTCACCTGTCGCGCCATGGCCGAACGGATGGCCCAGACGGCTGGTGG  
CCAACCTCGGCTGGAACCAGATAGCAGAGGGCATGGCTCTTCGCCAAGCGGTGACCA  
GTACCGATGCGGTGTCCGCTATCGAGCAGGCCGAAACAACGCGTGGCAATGACGGT  
GTTCTTGGGTGCGGTGGTAACAACGCTGGTGGTGCTGGTCAATCCTCGATCAAGGTG  
GTTGCCGATGTGACCCGCGCGGGCTACAACCTGGTCAATGGCCGCAGCGTTACCGAT  
ACCTCGTCGATAGATGCAACTAGCTGCAACAGCTTGGCTTGCCAGACATGGCCTACC  
CCGCAAGCAGCAACAGAATGGGCAACCCGTGTCTTGGGGGAGCAGGAGCAGCGTAC  
TTGCGAAGACTGTACCAAGACTCAAACCATGCCAGGTGTGGGCTTGACGCCACTTAT  
CCAGGAAGAATACGAAGCCAAATTGCAGTCTCTGCAGGAGCTGATCGACGGAACCC  
GCAATACCACGTTTCGAAAATTTGCGCGCGGGCCGGCAGCACGTCTTTGCCGATCACCC  
GGGGTGTTATTGAAGCGCTGCGAGATGAACCGGACCAAGATATCC

>CONTIG\_129\_length\_3889\_cov\_28.873737

CACGATCAGTCACTTGCCGGACCGCCTCGATCTTGAATCATCCGTATATCGCTTGC  
TGCTCATAGACACCTCCGAATCGACTATTTTCCATGGCCTTGAGATGTCTAGGAAAC  
CCTGGGCGTATCATTTTTTCAATTTTCGAGGGAGCCCAAATTTTCAAGCCGGCGCGAAC  
TTGACGCGAGCCGTTTTCTGCTTGACTCATTTCCAAGCGACAGGAGAAACGCATGA  
CCGCAACGAATCACTACCGAGATCAAATTCAGCGGGCCACCGAGCGCTTAGCACAG  
CTGCAAGCGAAAGAGCTTTTAGCCAACAGCGCCGCGAAGCAAAGGCGCAGGAAA  
CAGCGAGGCGCGAAGAGATGAAACGACGGCAGCGAGTGGCTGACCTAGTCTTCCAG  
ACGGGTGCCCATGCACTAGACGAGGCAGAACTGGAAGCGTTGCTGCTCAATCACAT  
GAGAGACCGGGCAGGCTTGCTTCACTAACCTTGCCCTATCAAGTCAGCTTTTTTGCA  
AGCCACCCAATGCTCGCCCATGGTCATCCGAGGCCATTGCTCCCGCTGGACGCTTCC  
CGGCTGCATCGGTTCCATGACTTGACAACGGATCTGGCCCTGCTTGGTAGTCCAGAA  
GAGCTCGACGGGCCAAGGACGGTGATGGCGTGAAGTCCCGACTCTATCGCAGCCCT  
GATGATCCTGTAGCTGTCTCGGTCGAAACCCAACGGCTCGCCTTTCAGCTTCCTGGC  
CGCCGTCAGTGTCGTGACGGTGCCAGGTAGTGCCAGGCATCCAGCACGTGGAGCT  
GGCGCAAGTTCTCGCACTTCTCTTCCAACGCAATCCGGCCATGAAAGGGCCAGGTTG

AAAGCTCTAGACGAATGAGTGCAGCACGTAGGCGCTCTTCTTGCTCGTCCGGGGGCT  
CACCTCCCGAGCAAGCGCCGGCGCAGCGCTTGAGCATGGCCCGAAAGCACGGGCGA  
CCCGAGGGTGGCCGCTCAAGCTCCACCAGGGCGTAGCAGAGCCGGTGGTCATCGGC  
GATGCGCCGTAAACTTTTTTGAGCGGCCTGGCGATGAGCGACCCGGACATGCTGATC  
GTGGTGATGGCGGAGAGCGGCGGGTGTCCAGACATTGCTCGTGCGACCGCCGATGG  
CACGCGGTTCCCTAACCTGGTGCGGCGGAGGACTTGGGGAAGGTCTTCCGCAGCCT  
GGCCTTGACAACGGTAGCAGGGCTGAAAAGGCGGTGCTGAAGATGCGCAGCGAAG  
CGCTGATCGAGGCGGACAAGGATGCCGATGCGGCGACTGGACGGGACTTCCACTAG  
CCGCCATCCTTACTCGGACACTCTCAGCCGGAAGTCCACTCGCTGACAGGAAAGCG  
AGCTCCATCGATGGTCTAACCTAATAGAGCCAGTAAGGAATCGCATGGACGACGAA  
AAGCAGCGGATCGCACAGTGGCGCGCGAAGAGGCGTCAGGAACGCTTCGAACAGG  
AACGCGGCCGAAGCCGCACGCGGCAGTTCGCAGGCCACTTCTTCCTCGCGGACGAT  
GATGAGGAAAGCATCGATCCCGCCGACGACGCCGCGGATGCTGAAGAGCAAGCATT  
GGCGCAGCGAGCATCGGCGCCTGCTGAACCGTCTCCACGCCTGTCCAGCAGCGAGC  
TGCGCCTTGCTTTGTGGTCCTGGGACATGGATTTCGCTCCGCCAGTTGTGGAGCGAAC  
GGGCGCAAAAGCTGTCTATGTTGAAGACGCTGCACGGTTGCTTGCTCACATCCGCC  
ACCGCTCGGGGATTGATGCGTCCCTTCGATCTCCGGCGCAGATGACGGGCAACGAC  
GCCATCCAAGCCTTGAAGGGCTCACTGGAAGAATCGGGCCGGCTCCATCTATCCTCG  
ACTCCCCCATCTATTCCGCCCCGACCCATCGTTGGAGGGGAAAACGGGTTGAGCAAGTG  
CTGCGTGTGATCCGGGAAGGACAAGCCGATTTCCGAAAGCGCCTGGTGGAGCACTA  
CGGGGCCGTCTGCATGGTCACCGGGACGTTCGCACGCAAGCGTGATCGATGCCGCGC  
ACATCAAGCCTTACAACGGGATCTCTACCAACGCCCTAAGCAACGGCTTGCTGCTTC  
GGAAGGACATCCACGCCCTGTTTGATGCAGGATTGCTCGACATCTCACCAGACCTGC  
TGGTGTCTGTCTCCGATTTCGGTCACCGATCCTTGCTATCGCACACTTCATGGACAGCG  
GTTGACGCTGCGAGCCCCATCTAAGATTTACATTCGGCTCTGCTTGCCAGGATGCG  
AGGCGAGGCCATGAACGAAATAGGCGGCGCCTTTGCTGGTGACAAGGATCACGATG  
GACACCCACGCTGACCCTTTGGAGCACGTCCGCATGGAGCACGGCGAGGTGCGCGT  
CTACCAAGGGCTGCGCCTTTACTCCTTTGCCACCTTCCGAGACGAAGTGGTGTTC  
GGCTATCGACTCCCTGGATAGAAAAATCGACGAACTAAGAAGCAGCCAGGAAGAAG  
TGGAAGAACCCTGGCAGCTGATAGTTACGCGAAACTCCAACAATCCACTGTTGAA  
GCGTTCTTGCTAGCCACGCAGTCCATGCACGAACGGGCACTGCGAGGGTTGATGAC  
CGCCATGGCGCGAAAGAAAGCATGGTCCAACGCCCAACAAGGCCAGATCCAACGCT  
GCTCTTTGACTGGCAAGGAGAGCCTTCAAAGCCTCTTCCTTGAACCTATTCGATGCGC  
CGATGGAACGTGTTGCGGTTGCACGATGACCTGCTGTTTCTCAACTTGCTAGGCAATG  
CTCTTCGACACGGCGACGGGAACGCCGCTATGACTATTCATAAGCTCGCCCCGTCTC  
TCTGGATCAACTGGCTTCCCCCAGGCACGGTCATTGCCAATCTCTTTACCGTCCCACT  
TGACGCACCGCGCCACCCTGCCTTCGATTCCATCACCTTCCCCGAACGTGTCCTCGA  
GCAAATGTTTCATGGCAGTGACGGCCTTTTGGGAGGACATAGAGTTCGTGCGGTGCA  
ACTCCTTTTCCCGGCAGTCGGAGAGCACCGAAAAACACATTGATCAGCTTCGAAGCC  
GGCGCGCCATGAGATCCAACGAGCGCGTATGGGAAATAGGCTGACCTCAATCAGGG

GCGACCACGCTTGCCCTCACTTTTTCAGCGTCCACTGGCACCCGGTGGAAGTTCACAT  
TGAGTCGCTTGATGAGTGCCTTGGTCGCCTTTTTTCGGAGCCCGCGAGCACACCAGGA  
CGGCCTCGCCATTGGGCACCTGGCGCATGGCCAACTGTTTCGGCACGCAGGATGGCG  
CGGTATTTACGCACTGATAGACCCCGCGTATGAACTCGTCCTCCGAGCACTTGCTG  
GCCTTCACCTCCACCGCCAGGCGCTGCTTGCCGTTCTCGAACAGCACGTCCAACCGA  
TCCCCGCTGCTCAACACGGCCTCGTTTTCGGCCCCGGCTCAAAGGCGCCGAAGTCGGCC  
AGTTCCTCGGGGTGTTGACGCATCCAGCGCTTGAGGGCTTGGTGTTCGGCGCTCTCG  
GGTGCTCCGCCGGCTTGAACCTTGGGCAACGGGAGCACGTCCGCCCTTGTCGGCCTCC  
AGTTCTCCGGACGCGGGTTCCAAACGGGGCCACTCCAAGCGCCGCGGCGATCTGGTC  
CCCGACGTCCCCCACCCTGAGTAGTGGCTTGGTTTAGAGTCCGGGGGTAAATGATAT  
CGGTGTTTGCCAGATGTTGGGCATAAGCAGCCGGGGTTCATGCCGCCGATCGCCTTCT  
TGGGTCGGTCCTCGTTGTATTTCGCGTCGCCAGCGTTTCGATTTTCGGTGCGCGCGTGCA  
GTAACGTCGGGAACCAGTGCTCGTTGAGGCATTTCGTCGCGTAGTCGGCCATTGAAGG  
ATTCGACGTAGGCGTTCTGGTTCGGTTTGCCGGGTTGGATCAG

>CONTIG\_130\_length\_3844\_cov\_130.670971

CTTCTACGTGCAATTTCGCGGACACGATTCCGCCCGAGCACAAACAAATCGATTGCGT  
CGTCGTGATTCCCGACAGCAGCTCGATCGACGATGACCTGATTCTCTACGTGTTCCG  
CAATTCGGTCAGCCTGCTTTCCAGCCGAGGGATCGTGCTGCCCGACACCACACCAGC  
GGCTTGAGGTAAGCATCGGAGATGGGCTCTTCGATGCCTGAGTCGAACAGATCGAC  
ATTGGCGGCCATGCGCACGCCTGCTTCAAGAACGCCAACCGGTTAATGGATGAACT  
GCGCTCTTGACCAGATAAAATTTTGGAATCGTAAGACGGATGTGGCTCTATAAAGTC  
GTCAACAGCGCGTTGAACGCTTTGGATAGAGGCTGAACTCAGCCACCTTGCTGCCGG  
ACGCGTTTATAGCCGAACCACCCGCCTAGATTGGGCGCGAAAGTGACAGCAAATTC  
GGCAACAGTGGCCTGCGTCTGTCTTGCCAAGACGTCGAAGATGTCCCGGCTTGCGTG  
CTTCTCGGATCTTCGGGATCTCGAGAAAATCTTAACGCTGTGGTCAAGCAACAATGC  
GCCTTGATTTGGCGGAGAGAGTGGGATCGGATCACCTTCAACCTAAGCCCTTCTCAC  
CGTTGCAGAAAGCCTGCTTGGCAGGTTTTCCTTTCAATGTTTCCTCGATCATAGCCTCC  
GCATCGACCCGATGCTAGCGTCCGCTTGCCATCGGCGAGTTGCTGACGCCATTGTCT  
GTCTGCATAAACTCGGACCTCCAGACATGAGCAACTCAAACAGCCCGCTTGAAGCA  
CGTGTGGCCGTATTGGTCGATTGCGACAACGTGCCGACTGACATCGTGAGCACGCC  
TTGCTCATGGTGGCTCAGTTCGGCCGGGTAGTGCTTCGCCGCGGGTATGGCAACCAC  
AGCACACTCGCCAACAAGTGGCAGGAGGTCCTGGTCCGCCAGGCATTACCCCCGTG  
CCTTCAATACCAATACGCCTCCGGCAAGAACACGGCAGACATCGCCCTGGCGCTTG  
ACGCCTTGGAAGCACTGTTTCGACCACCGAGCCGACACCTTCTGCCTGGTCACCAGCG  
ATTCGGACTTTTTCCTACCTCTGCCGCAAGCTCCGGGAGCGCGGCGCCACGGTTTTCA  
TTGTGGGCGAGCCCAAGACCCCGGATGCCTTGCGTAACGCCTGCGACCAGTTCTTCG  
AGTGGGACCGGACGGCCAAGGAGGTGGCCGCACTCGAAGTCCAGGGCAATGAACT  
ACCTGTCCTGAAATCGGAAGCGACGAAAGAAGAAGCCCTCGCGTAGAAACCAAGC  
CACTGCCGAAACGGCGTCCCCGATTCTTGGTTCGAAGCCGTGACACTGCTGACCGGG

GACACCTCCGAAGGCAAGGTCGGATTGGGAGCACTGGGCCAATACCTTAAACGAAC  
CGACCCGTCCTTCTCACCTAACCTCTATGGCCACTCCGGCTTGCTCAATATGGTGAA  
GACCTACGATCTACTGACGACGCAGCGAGAGGAAACCGGCGGTTGGTCGGTCAGCA  
TCTCGCACAAGCCAGAGGTTCTCGACCAGACGGGATGATCCGCATTGGATTAATGAC  
CGACGTGGGGCGATAAGCTTGCGTCAGGGCATGTGAGCTACCCACGATTGCAGCG  
TGTGGCGAGACTCCCAAGGACGACGCTGCCTAATGGACGGCCGCATAGCGGCATAC  
ATCCGACCTTTAGCCGCAGCCGGTGAGATCCCTTTGACGACAATGATGCTCATCAAG  
GCAGACAAGCAACAATGACCGATTCTACGTTTCAGCCCCATTCCAAGCACCTTTTCA  
TGCTCCAGAAGATCAAGCGCCCCGAGAGAGCAGGAAAGCTTGAGCGCTTTGAAAAA  
TACATATTTTCGTGGAATGATGGCTCTTTTGCTTTTTGCCTTCGGGGTGGTTGCAGCTA  
GCAACCTTGCAATGGATTAGCAACACAAATGCCAAGAATGTCTTGATAGTGGCACTAC  
CGGCATTAGTGGCTGTCTTTCTCGTCTTTGGGCTTCTTCAGATCATTAGGTCATTGT  
GGCGTGGAAGGAGGGCTATGAACCGATGACAGACCGAATCGACACGGCTATCTCCA  
GAGAAAGCGAGATTATGGACGAACTCGGCACATGCAACCCGCAGACTCTCCGAGAG  
CGCTCAAAACACATAGACCTTGAAAACAACTATTGACTCGCCGGGCAGGACTATC  
CACGTTCTTCGGTGCGATTGGCGTTGTGTTGGTCAATCTCTTCGACGCTGGTGAGAA  
GGTCAACATATGGTCTAACCCAGCCAACGCCAAAGTATTTGTTTACGCTGGAAGCCT  
GGGCATCCTCATCGGCTCGATCGTGGTTTTTATATTGGCCGGAAGCTTGAGCGCAT  
TGCAGGACTGTTTCGGACTGGCGGCAGATCGCATTGAACAGAGGCCTGCGCCAGAAA  
AAGAGATTGTCTGACAGCATGTCGCGACCGCTCGCGCCCCCTGCCAGTCCCCATTCC  
CAAATGAACATACGAAACATGGAATTTTGTCTCGCATTCAAATTTGTGAAATAGAGC  
GTATAGCGAGCTCTTGCGCAGCCGGGAATTGTTGATTGGATGGGGACTTCCCCCACA  
CGCAGGAGTTTTTATGACCACCAACCCTCAACAACCTCGAAATCGCCGGCCAGCTGCT  
CGCAGGGCTGATGAGCCAAACGCTGTCTGACGAGCCGCTGGTGCGGCAGAAGAATG  
TTTGCAATGCCTGGGCCTCTGCTGGCGAACTGATCGTTTACAGCCAGAAGAAGCCGC  
CGGGCGGAGGCAACGCCACTCAATCCTTGACCACGCTCCTCCGATGCCCTCTCCGG  
CAGTGCGCACCCGCGAAGCTGTCATCGTTCGAGAGTTTCCGTCGGTGGAGGAATGGC  
GAGCGGGCCGGAAGCCCAAAGACGCCCAGCTGGATCCAGTGCGCAATAAAAAGCG  
CCCGACCCTCCACTGAGCCGGCCAAGAGCCCGCAAACATTGAGCCCCGCATCGCGG  
GGCTTTTTTGCTTCAGTGGAAGCGCGGCGGCTTGGAACATAGACAGGTGCAGGGG  
CAGGAGGGACCGAGATGGCAGGACCTGGACGCGCTCCATCGGGCTGGTTCGCCACG  
TCAAGTTGGAGGGGGTGGCGCTGGAGCATGTCCCGGCTCCAGGCCTCCAGATGCGC  
CGCGCTGGCCGACGCCTCTTTTTCGCAAAGGGCTTGTTCCCTCCGGGGTCACCCTGGC  
CCTTGCAATCGGAAAGCTCTGCAGCTCGGGCTTCGAGGGCGCTCAACCGACGCCCCCG  
CCGCTGCTTCCAGTCCCCCTGCGTCCATGAGGTCCCCGGCTCGGGATTGTTCCGCAA  
AAAGTCGTGCCACGCGTTCTCGGCCATATGGTGACGCTTCTCTGCTCGGCGCACCGC  
CAATAGCCGCCGGGCGAACTTCATGGCGGCTGCCTTGAAGCGCCGAGTCGCCGGA  
GCAACTCGTTGAGGTCGGGACGGAGCTGCGCTGTTTCGGCGAAGGCAGCGGCCCCGT  
TCCCTGATCCACTGCAACAGGCGCTGGGTTGCTTGAGCGTCTGAGCCAGCCGGGG  
ATCCGCTTGAACAGCCACTCCCCATTCTGTCGCTGGCTTCCTCCGCGAGCTCGGAGAC

CGAACGTGGCTCGCGCGACGGCTTGGCCTCCTCAGCCTCCATCAGTCCCAACCCACG  
GGCAATGGTCGCCATGCTGCGGGACACCTCGATGCGCCCTGCCCCAGGCCCCGAGCG  
GCAAGGACAGCCCATCAGAAGGTCGGCGAGCCTCGCGCTCGGCCTGGGCCTGGCTG  
TGACCATCGGGCACCGGCATGGCGCGTCCTTCTTGCTCGAACACGTCAATGAG

>CONTIG\_131\_length\_3779\_cov\_87.773549

AGAGGTGCCGCCGCTGTCACCTGCCACGGACGAGCGTCACCGCCGATTCTTGTGTC  
CTTCTTCAACCACTTGGTCAACGGACAAGCCATCGACTTGTCACCGATGAAAGCCTT  
CCGGAACCCAAAGAAGATCACACCATCGATCCCGACAAGGCCATCCGTCTCTTCG  
AGGACGCAGACCTGCAAGCCATTTTTGACCCCGCAACCTTCATCCCTTGGGCCAAGA  
AACCGCAGTATTGGTGGGCACCGATGCTCGGCTTGTATACCGGTGCCAGGGTCAACG  
AAGTCTGCCAGCTGAAGTTGAGCGACATCATTGAGGAACGCGGGGTGTGGTGCATC  
GCTTTCCAGAAGACGTTGGACCAAGACTTGGCCGCAGACCCAAAGCGACGGCGGCG  
CAGCCGGCAAAGCATGAAGGGCAGTGGCTGCATGCGCATCATCCCCATCGCCAAGC  
CGCTCTTAGAGGCCGGATTCTTGAGTTTCGTGGAAGACATGAAAGAAACGGGCCAT  
CCTCGGCTGTTCCCGCTGCTTTCTGCTGGCGTGAACCGCACGACAGGCGAGACCAAT  
GCGCGTTACAGCCAGCAGTTTGTCTGTTGACTTCGGGCGCTACCTGAAAAGCCTGGGC  
TTTCCCAAAGGCATCGGATTCCACGCCTTCCGCCACACGCTGGCAACCGAGCTCGAT  
GTCAACGATGTTCCGGAGAAAGAGATTGCCTTGGTCACCGGCCACAGCACCGATCC  
CCGCGACCGGGTCCAGGTGCTGCGCAGGCACTACCTTCACAAGAAGCCACAGGTGA  
CGCGCAGCAAGCAGATCAGCGCTTTGGAGCTGTATCAGCCCAACGTCGAACTACCG  
CGCTACCAGCAGGGGCAGTTCGCCAATTGCTTGGCTGATCCGAGTAGGTTCTACCCC  
TGAGGGGGGACTTGATGCGCCGCGGAAACCGTGCTAGAGTTTTTTTCATACCAGCGAC  
TAGGAGTAGCTCCGGTCTAATGTCTGGTCCCTAGGGCGTTTCATTTACTTACGCATGC  
CCGGTCGCAGGCTAACGCCCCGACCGGGCATTTCGTTTGTGCAGTCCTAGCCAGTGAT  
GGGCTACGCTTCCCTTCACCCCAAGTGAAGCGATAGGCCGCGCTTCATGACCCACAGC  
CATTGAACAAGCTGTTTCGACGCCATGTATCACGGCAAATATCGCTTCGATGAGTTTT  
TGGCCCTTTCTCCCGAAGAGAACTACAGTTCGGTTAGCTGGAAGACCCGCACCATCT  
ATAAGCCGTCCAGAATCCTGAAGGACTTCCACGTCTTCCTGGGTGCGGTTGTTCTAG  
ATCATCTACCTGTCGACGCTTCGGTCTCCTTTGCCTACCGCAGAGGCGCAGCCCTCA  
TACAGGCGGTGCGAGCCTCATGCAAAGAGCCGGGCATTCTTTCAAACAGATCTGGAA  
CGGTTTTTCGACAGCATCACGACACCGCTGATTCGCAAAGTCTTGATGCAAAGCCAG  
ACGCCAGTTACCGACCTGCAGAATCACCTGGAGCAAATCCTCAAGCTCCTAACGGTC  
GATGGCAAAGCTGCCTATCGGCTTCTCCACCTCACCTATTTTGAGCAACGCCTGCCTC  
CTCTCTTTTGACCAGCGATTGACAAAGATCAGTCACGACAGGGGATGGATTTATACG  
CGCTATGCCGATGACATCATGCTGTCCACACAAGACCGATCCGAACTTTTCGGATGCA  
GGCAACGTCATCGAGGACTGTCTTTCCGCAGAGATCGGCGACGAATTTAAGCTCAAC  
CCTGCAAAGAGCAAACCTGACCACTATCGGGCGTAAGGTCAAGCATTTGGGGCTGGT  
CATCTCCCCAGCGGCGATGTTGCTATCGATCGCGATGTTAGGAACCGGATTGAGTC  
CTGGATTCACTTCTACCTGCGAGATCGGGCGAAATTACTGAAGATATTTGAGGAGAC

TCCGAATCAAGGGATGGAAGAGGGCTTGGAACGTCTTAGTGGCCTCGTCAGCTATG  
CTCATGCTGCAGACCCGACCTATCTTGACAAGCTTAGAAGCAAGTTTGGCACCACCG  
TCATTGACAGCCTCCTGCATAGGTCTGCCAAATGAGCCACCTTCAAGTGACGCTGGA  
CGCTATCCAACACGTCGCTCACCTCCATCTTGACGTGGATCTTTCCAAGAGTGGACT  
GATGTGTCTGGTCGGCCGAAACGGGGCTGGAAGACGACCTTGGTTAGGGCGCTCC  
GAAACCTTTCCAACCTCAGATACGTTTGTGCGAACAGCGACGCCTTACGCGTTCTCAG  
AGAAAAGCAGGATCGTCTACGACCTAGACGGCGAACAAGTGACGTTCTCCTACAAC  
AGCGCTGTTTCGCTCTCTCGACTGTGCGGAGAAAATCTCCAAGAAATGCGCGAACTT  
GTCGATGCTGAACCTCCGATGCCATACGGGGCCCGGTTCAACTACTTCAGAAGCGCC  
AGCGAAGCAGACCAGGACATTCGGACTGCCATTGCCCTTGGAACCTATGATCGCCC  
AGAAGAGCTCATCTCCTTTTTGAACGCAGTTTATGAGACTGACCGTTACTCAGCAAT  
GGTCGAGGTTGACTCAAGGGGAAGAGCTACTACGCGCTTGTTAGGGAAGACGGGA  
CATACATTAGAGAAGATTATCTAAGCTCCGGGGAGCACTTCCTCATCAATCTCTTTC  
GGACCATCAAGGGCCCCCTCAAAGCTACTGGTGATTGACGAGATTGACCTCTCCTTGG  
ATGCAGCAGCCCAAGCTAATCTGCCAGGCTGGCTGCGTGGGTTCTGCGCACTATACG  
AATGCAAAATTCTCTTCACCACACACTCTCTCGCGCTGATGCAGCAACTGGAGATTG  
ACGAGCTTTTTTATATGGAGGACGAAGCTGGCAGCGTCTCCATCAAACCCATCTCCT  
TCAGCCACGCGACGCTAAGGCTATTTGGCTTTATTGGCTATGACCGATATATCGCAA  
CCGAAGATAAGAAGCTTGTCGCCTTAGTGATCATCTAGTCAAAAAATACTGCCCCA  
CCACCCTACTAAGCTATAAAGTGATTTACATCGGAGGGGCGTCTCAGGTTGCAAGCC  
TTATCGAGAGCAATGAGTGCGATGGATTCTTGCCGCTCCTGAGAAGGTGATCGCGA  
TCCTCGACGGCGATCAGCTCAAGGAAAAGCACGCCCAGAACGCACGTATACATATG  
ATTCCGCTTAAAAGCGTTGAGAAAGCGCTCTGGGCGGCACGGCAAGAAGATCCCGA  
CTTCCCATTTGTCACCCAACGAGACAACCTTTACAAGTGAAAAAGATTTTGAGAACTA  
TCTGAAAGATAAAAAAATTGCCACGCAAGAGCAGATTTTTGATTACCTAATCGCAA  
GGCACGAGGCAGGCTTCCAACCTATTGCCCAGGTCTTGAATGACTTGCTTCCGCCGC  
CGCATTGTTGAATTTAGCTATATCCAAAAAGGCAGCAGGCTCACCCGAGATTAGGCC  
CCACGTTACGCAAATTATCTCGTGCAAACCTCGCGCATGTGGCGCAGCAGTTCTCT  
TGCACTGCTTCAGGCAGTTGCGACATTACCAAGATGGCCTCCGCCATTGGCTCACTG  
ACGGCATGGAAGTAGGCGACGGGCAGCTCCAACGCCTCCGCCAGCTTTGCCATGCT  
TTCGTTATCAGGCATGCGGTCTCCTCGCTCGTAGCGCGAAATCCTGGGAGCTGCCGA  
GTTCTGTTCTCCTCAGCCCAAGAACAGCCCCCAAGGCGGCCTGGTTCATGCCCCGCGC  
AAGCCTGGCCTCACGAAGGCGACGGCCAAAGGTGT

>CONTIG\_132\_length\_3778\_cov\_9.018351

ATCTCACGAGGGACACTCATCCCTCTGGGGAGTGTTCTTGTAGTCTTTTCAAGGAG  
CGCATCATGTCAAAAAATCCAATTGTCGCTGTTATCGTCGAGGACGATCAGGTCAAG  
GACATCATCATTGAAGGCTGGCCAGAGAATGTCGCTATCCCGCGTTTTACCATCGCT  
AACGTTGACACAAGCCACGTGCCTAAGGACGACCTGTTCCAGCTGCGAGTAGGTGA  
TTCAGTGTTCTGAAGCCAGCGGATATGAGCTTGACCCCAAGCTATACCAACCCGGCCT

CAATATCGTATCTCCGGCAGCAGTCATCGAAGCCTTACACGACTTGGGTATCGAAGC  
AGTTGTTGCGCAGGCTCGCATCATCGCTCGAAAGTACGCGATTGAACTCAACGACTT  
GAGTGCTGCGCGCATTGCAGTAAAGGCCTCAGCTATTCAACTGTGCATCACGCTGGA  
CGAGCCTGATCTAACGGCAGCTGTGAATCAGTTGACACAGCAATCTTCGTAGTCATT  
TAAACCCGGATGTGCATCCGTACTTCCAATCAACTATCGCCTGAATCGAACAAGATT  
CAGGCGTCACGGCGGATGCTATTGTCCGCGAGGACATGGCTCCGTTTTTTCCACCGG  
AGAAGTCTCATGTCCCAGTTATCCAATCCTTTCATTTCGTGGCTATCAGAATTTGAGTA  
TCGGCCGCACGCTAGCCATTTTCGACAGATGATGACCAAGCGCTGATCTATCGCACTC  
TGCATGAGTCTCAGATCCGACTGCATGATCAATCTGTTCGTATGCCATCGGTGCATCT  
TCAACGACGACCACGCATTAGTGATCGATGGTCAGGATATCCCAAACGAGATCGCC  
TCAGGTCATTTCGAGCAGTGGCATCGTCCGCGCGGTGATCTATGCCGTTCATGTGCGAG  
GAGGGCGGCCAGCCGATCCATATCGGTGACACGTATTCGTGGGCCGACGCTTGTGC  
CGTCATCCAGCGCCTTAAGTTTGAAACGGGGCATTACAGCCGGGCATGGGAAATCA  
GTAAAAGCCATCTTACTGAGGAAGCAAATCAGTACCTCGAAGAATTAGCCGATTTCG  
CCGACTCCGCTAGGTCTGTTATTTGAGGTTTTTCGAATCCCCGATGGTCACTGCATCG  
GTGTGAAATTGGTATCCACGCCGTGGACAGACCGCAACCTGGAGCTCATCGATGGC  
CGCAGCTCTGTAGAGCTTCTTCAGGAGCAGCAGTCAGCAGGTGTACCGGAACTGTTA  
CTGGAAGTTCTGCACTTGGCTAGCCGCGCGGATACCCGGTTCTTGGTCTTTGATCCC  
GACGCACCACTGCTTGCCGGATTACCCGTCATTGTGGATTGAGATATCTCTGAGGGC  
CTCCTTCGGGGGCTCTTTCTTCATTTTTCTCACGTATCAATCGGGCTTTCACCAGTAT  
CCCTTTGTGCGCGACGTTACACAGTCGACGCGCCAAGCTGAGCGCCATGTTCCGCTG  
ACGAGTTCAGCAACATGCCCAGGTAGCCTAGACCTTCAAGGCTACGGTGTGCCCGC  
CACACTGGTTACATATGTCTCGGCGTGACACTGCGCCTTTTCTCAACCTGCAAGGGG  
TCTCCCTCCCTTGCGGGCGGGAGCCCCTTGAATTTCTTCAAGGAATCTCCCATGGAC  
AAACAAGCCATTCGTGCCCAGATGCCAGACTTGGTTCGCGATCATGTGCCCTTCTAAC  
GCACGCGTTATCAACTACAACATCTTCGATGGTGAGCCCAAGGTCTCCACACTGGGC  
TTCCACATCGATCCGAGGCCCTTTGAGGGGAAAAGTAATTGCGACTACCGACGAAGCT  
ATCGTCGTCAAGACCGGGCGCTCGGCGTTCGCTGTGCTTGACCGAACGCTTGTCACC  
GAGGTGCCTGAAAAAGGGGCCAAGGTGCAGATTGCTCCCTATGCCAGGCGTCGCTT  
TGATGGGCTGCGAGCGGACACACCCGAAGAGCGTAGCGAGCGAACTGCCGAAGGG  
CATTCGTATACGGTGCAGACTTTCGTACTGGGTGACGCGCCAGCCAAGCTGCCGGTG  
CCTGAACCTCGTTGCTTTGAACTGAAAGAACTTATCAATCAACTTGAGCAGTTACCC  
GCACCTGACGGCTTCCGGCGCATCACTCACCTGCTGGTTGATGCAGGCGCCAGAGAC  
TTTAAATGGGTTCGATCCGTTGCCGGCTGACATCATCAAGACACCTCCAGCCATCGGC  
TTCACGGTTGCCTCTGCGAAATTCTCGGGCCAAGTCATCGTGTCGTATGACCGGGGG  
GCTGACCAGTACGTGGTTGAACTGCAGCGCGACGGTAAATCCATCCACCGCGTTGA  
GGAAGTTTTCTTCGACGATCTTGGAAGCGTATTGGAAAAATTGATCGACGATGGCAG  
TTGGCGTCGTATCCACGTGCAGTGCCTACACGGACACAAATCTGTTACACAGTGAGT  
CGTTTTAACTTCCAGCTTTACGGCATGGAGAATTCCATCCATTTACAGGAGATCATT  
CATATGTCTCTTAGATTCAATGGCGACGAGCTGCGTCTAGTTTTTCGCCGAAGCGGTA

GCTAACAAGTGCCGCGTCATTCTGGTGAAAGACCACGGTGTGTACTGGTTGGCTGAG  
CATGGTGAAAGACGGCCCGATGGTCGTCAAAAATTGATTGCTTACGCGATTGGCTGC  
AACCTGATATTGATCCCTTCGACAGCTGGTGGAACCTGGCTCACACCGAGCTCGGG  
GGCGACGACTTCGCAGAACACTTCGACCCGAACGGTGATGTATTTGAACGCATTTTG  
ACCAGTAACGACGATATGGAGCTTTCGGCAACATCAACCCATCTTTCCCTTCAGAAC  
GTGCCACGTCTCATAGGCGCTCCTTGATCACCTATCTTCCAGCCCCCGCATGCGGGG  
GCTTTTCGTATCAAAAAACCGGTCGCTCGCCGATACCGATTGGCGATGGCGCTTTAG  
CAAAGCAAGCACGACCCTGCGTGCATGCCCCGCTGACGTTGTCAGCGACATGCCACG  
CAACCTCGGTCTTCAAGGTTGCGGCGCAGCGTTTGCTGTGTGACCGAGCCAGTTCGC  
TTCGCATCCGTTTCGCGAACAGCTATCGGTTTGCCGGTAGTGGATGCATCGCCTTATC  
AACCCATCGCGGGGTTACGCACCTCTTCCCGCGCTTTGGGGGCTGGTGTGTCTCCGC  
TTTTCCTATGGAGATTCACCATGAACACCACATCCAACGAAAAGTCCTACTTCGACC  
TCCACACTTCCGGCATCGGCTACTTGCAGCGTGTCCGCGAGGTTCCCGTCAGGGGCG  
GGCGTCGAGCTCAACCATTTCTAGCATGCACAGTTGCCGCGATGTTCCGATCTGCCA  
AAGATCCGAGCTATCGGTACTTCGATGTAAAGGTCTCAGGTAGCGAAGCCAAGAAG  
CTGGTCCAGCGCTATATCGGCATTGAAGATCAACGTCAGCGTCCGCTGATTTCGGTTT  
CGGATCGGTGACCTTTGGGGCGATGCTTATATCCGTCCCAAAGGCCAGCGTAAAGG  
AGAAGCAGCAGCCAACCTCAAGGGCCGCTTGCTCAAAGCCGAACCTTGTCGATCGTG  
CCGAACCTGGCGCTGATCGAAAAGCACGAACTGATCACGCGCGGCATTGGATATCTC  
AATCGCCCCGAAGGAGGTCCTCCAGGGATCGCGACCCGTTTCTGTCTTGCTCCATT  
GCTGCACTAGCTGGCCCCGTCGATGAACCGGAGTACCGTTACATCGATTCTATTGTC  
ACAACCTCAGGACGCCCAGCATCTGGTGC

>CONTIG\_133\_length\_3737\_cov\_270.134626

AGTTGCCAAAGCGCTTGGGTAGGCCGCGCCATTTGCAGCCATGCTCGGCAACGTAA  
AGGATGGCGTTGACCACTTGCAGGTTGGTCATGCTGACATTGCCGCGCTGCGCCGGC  
AGGCAGTGTTGATTAGAGAAAATTGTGCTGGCGTGATCTCCATGCCCGATAGTTTA  
ATCGCTCGGGCCATTAGTGTTAACAGGCCCTAATCAATTGACTGGATCGATTTCGAA  
TGAAAACCGCGTCTTTGAGTGCCCTTGCCGCTGCCAAGGAAAAGCTGGCAGAAGAA  
ATTCGTAAGTTAGAAGAGCAGGAGGCTCAGCTGCGCCAGCAACAGTCGTCCGAAGC  
ATACTCGGAGATCGTCAAATTGCTTGATCAATACAGCGAGCATTTCAGTGCAAAGCA  
AAAATCTGAAATTGCGGCTCTGATCGGTGCCGGTGTGGCTAAGTCGAAGAAGGCTG  
CTTCCACAAGAAAGGAAGTAGCGCCCAAGTATTGGCTGCCACACAACCAAGAGACA  
TGGTCAGGGCGTGGTCGTCCGCCTAAGGCCTTACCATTGTCAGGGGACGCGCTCT  
TACAAAGAGTGGAAGCCAAGCATCCCGACGAAAAGTTTCCTAAGTATCCAGGATG  
AACTTGAAAAGGCCTCGCATGGCGAGGCCTTTGTACAAGTGTGAAGATTTTGGGAAT  
CACAAGACAGAGTCGATTATTCATATGGCTAAGCACTGGTCGCAGCTAAAAATAAA  
TTCTTGTGAATGGGCACGAGCAAAAATACCAGATCCAACGATCACAGAGTGGGAGT  
TGAATCACCTGCAGGGCATTGTCAATGCGTGTGATGCGGCTGACCAAAAAAGAAAC  
TTGAAAAAATTCTGGCGGGGATAGTTAAGGCGTGAGCAGCGGAAGAATAAGGGGGT

AACGGGCATCATGGAACCAACCTACGCTAATTCACCAATAGGTTCTAGAAACTGGC  
ACATTGCAGCATCGAATGATAAAAATCTTAGCGCCGCAGATCGTGCCGTACACCGG  
CAGAAAGCTCTCGAAATGAGCTTAAAGCCGGCTTTTAAGCCGCTATCTAATGAAGA  
ATATTTGCGCGATAGGTTCTAATATCTCAGCTTTCTCTTCAAGATCAGATCACTGAGG  
CCATCGCGTCTCTCAGGCACTGTAGAAGGGGGGGGGGGCGGGTCTGAGCGATGCTTG  
CGCAGCTGAAACGCACGCCCTACCAAGAATGCTTGGTAGGGCGTGCTTCAAACCTA  
CTCTGCATTGGCTGCATTGGGCTTGAGGATGGTCATAACTGGGAGAGCCGCATTAAT  
GAACTACGAGGCCGTACCGCATTTCTGCAGGTTAACTAACTCCAAGTTAGTCAGT  
TGTAGTTTCCCTTTGTAGAGATCAACTTTTGGCGGAGTGCCTCAATCCGTTCTTGCG  
TTGGCTACAGAGCTCGTCAAGCGTGTCTCGTAAATCTCAAATGCGTCCAGCAGTGC  
TTCCATGTCTACATCTTGGCCGTGAGAACCTAAGTTTCCAATCATTCGGAGTGCGGT  
AAGTGAGCGTGCATGTTTCGGCATTCACTTGCTCATATGCCGCGATTCTGTCGTTGAG  
TTGAAGCCGATATGTCTTGCCGCTGCTATTTAGCTTTGTTTCGTGGAATTTGAAGGAA  
ATCAAGTAAATACTCAGCGCTGGCACGCAGTCTATTTGCAGCAGCGCTTGGGTCAAC  
CCAGAAGTTCCCGGATGCAAGCTGGATACTCTTCGAGACATCTTTCGGAGCTTCGCT  
AGGTACTGTAATGATGTTAGGTGCTGGGAAAAATGAGCGGGGTCTCAGGAGAGCTT  
CATAGGCCCATGAGAATCTTCTTCATCATAATATTGAGAAAGAGTAGTGTCTCCAG  
AAACGACCACGACCTCTCCGCAGCTGTTGGTGTACAGGTTAGAGAAAGTCTAAAG  
CGCTGGACATCCCAGTCAGGTTCCAGTCAGTATGAGCACTGCCATCTTTTGAATAA  
GTAGGCTCGTCAACTTGAATTGATTCTTTGTCGAGATGCAACCTTCCATTCTTGCACG  
TGGGGCAAGGGAATTTAGGGAAATTGGTGCGACTGTAAGTGCTGGCCCACAATGCT  
CGGTCAAAGTCATCCGCTTTCCTTTGTTGAGTTGTTTCGCATATTTTGGTTTTTTATG  
CTTAAGGATCTATTAGGTTTTTATATTTTGTAGGTTTAACTGGTTTAAAGGGTCTGGC  
GAGAGTGAATGATGCTGAATTTGTATATGGTGATTAATATTTATTGCATGTAAGGGA  
TTAATTCGGCCATGGCGGCATTAATAGGATTGAAAACATGTATTGTTAGCAGCTGGA  
CCTTAGGCCTGAAAAAGCTCGCTAGGGCTCACCTTTTAGTCACTGAGGATAATTCGA  
CGCAGCCAACCTTAAAGAGTTTATTTGGTGAAAACGGCATTTCGACGACTACGTTTTAG  
AAGCCATGTGCTTGTAAGCTTGTAACACCAAACATCGTAGCGCCACCAACAACCT  
GGTGCAGCAGCAACTACCACGAGGCCGGCCGTCATGCCACCGCCAACCTATTGCTCC  
CAGGGTTGCCAATCCCGATGTCAGTGCAGCTGCACCAGAGGTCCCTGCAGCAGCGC  
CTGCAGATACTCCTGCAAATGCTGACACGGCTCCTGCTGCTGCGTCCGTGCCTGTGG  
AAAGAACTGCTGCCGCTTCAGACTGCTTCGATTCCCTTGCCATACGATCTTCCTGATT  
GTTACGCGCATCGTAACTACAATCGATAGTCGCCGAACCTCCCGTGTGATGTCTAGAC  
GGTTGGCATGCAGGTCAGGCTCTTACGCCAATATGCGGGAGACCTTCTATAACAGAG  
TTGGTCGCGCGATAAGATTTACTGAGCTTGAGCGAAGTAATCGTGAGGTTGATGTGT  
ATGGGAGCGGTTGTAGTACGGTCTGCTTCTACTGATTCTGAGTTCGAATTTTCGTTAAC  
TTCCAATCCTGCATAAAATACCTGTATTCAAGCGTTCGAAATTCGCCGTTCTACCGATC  
CACTTCCGCACCACACACATCTGGCACAACCTTGCTGCACGACAAACCCGAAGCTGG  
CATAAAGCGCCTGCGTGTGTTGGCTGGTGTCCAACACGACTCGCTGGATGTTTCGGCG  
TCAGGCGCACGGCTTCGAGCCGAGCCAAGAGCAACTCCGTTCCAGGCCTTGCGCA

TGCAAGGTCGGATGGACCATGCCCCAGCAGAGGCTTGCTGTTCGTGCCATCCGTGCTG  
ATGGAGTAGCCCGCGCAGGCCACCACTTCACCCGCACGCTCGATGACCTGGTAGTG  
CCAAGTGGCAGGGTGTGCGTTAGAAATCGCACGAACTCGGGTCGTTCTCAGCGCT  
GAAAAACGCCGGCACGTTGCCATCGAAGACAGCCATGCATGCGTCGAAATCGTGAG  
GGCGGTATGGCCGAATCGTATCCATGCCGGCCAGTTTGCCTCAGACAAGCAAGCGC  
ACGGCAAGAGCCAATGCGCGAAGGGCAAGTCTGGGCCAAACGCACGAGGCCTTGAT  
CCACCAATCTAATGGCCAATAACACTGCTGCCGTCTCTCCACTCAGGTAGGCATTC  
GCCAGCTGGGATGGGTCTCAACGTTCTTCATCTCCATCAGCGCTGGGCCTCTCAAAG  
GGACCTTAGCTTCGCTGTCCCAACCGCAAGGACAGGCCTCCTTCTCGACGCTGACGC  
TTTGTGCGGCCCTTCGCTGTGCGCCGCTTGCGCGGTGCTCGCTCTCGGG

>CONTIG\_134\_length\_3705\_cov\_12.579933

TTGCAGCTGCCCACCGATGGTGTAGTCGTAACGCAACACCAAGGCTTTGCCATTGCT  
GGTTTGCACCTTCCGCACCAAGTCACCGAAGCGGTTGTAGCAGTATTGGGTGATCGC  
ACCGCCATCTTGCATCTTGGATAAGCGCCCAATGCCAAACGTCTCACCGCTCGCGCA  
AACGGGCTGTATTGCGTCGTAGGTGTAAGTGACGTTGAGGCTGCTGGTTGGATAGCT  
GATCTTGGTGATGCGATTAAGCGCATCGTAACTGTATGCACTGGTGTTGCCTCGCGC  
ATCGGTCTGAGTAGCCCGGTTGCCTGCGCTGTCGTAGGTGTAGGCAGTCACCCCAGT  
GTCTGGACTGGTGAGCTTCACCAAATCGCCGAAGCCGTTGTATTCGTATTTGGTGTC  
CAAGCCCTTGGGGTCAGTAACCTTAGTCAGGTTGTCCAAGGCATCGTGCTCAAACCTT  
GGTTTCCGCCTTGATAACCAGCGATGTCTTGCAATGTGCGAGACAGGCGGTTGAGGGG  
ATCAAAGTTGTTCTGAGTAGCAACACCCAGCGCATCAATAACCGCATTGGCGTTACC  
GCCTGCGTCATAACCCCAAATCCGTCGGATCGCCCGCCGCGTCGCTTGCGTTTTTCAG  
CTGACTCAACTCGTTGTAGATCCGCGAAAGTGTCGCGCTGAGCGCACCTGAAGCGTC  
CTTCGTGTCTTCTTGATCCGCTTTCCGACATTGTCCAACGTGTAATGGACTGTATTG  
CCGCGCTGTCCGTGATGTCAGTCAGTCGATGTGCCGCATCGTAAGTGAATGAAGTG  
AACCACCATCTGGCTGAGTGACTTGCTTAGCCAAGCCAGTGGGCCAATAGTCGATG  
CGAGTAATACGATCGTCAGCTTCGCTCGACACATCAGTGCCGCGTATCTTGACGGCA  
CTGAGCCATCCACGCGGGTTGTAGGTGTAATCGGTGATGACGCCGTTGGCATCCTTA  
GTCGACAACGCGTGACCAGCACCATCATAAGCAAGATATTCAGTGCCACGCCCAAG  
GCTATCGGTGATCTTCCACAGATCGCCCTTGCGGTAGGAGCAGACAGCAGGCACAA  
GTCCACAGCCGGGATCGTCGCTGATGTAGTAGCTGTAATTCGTGCTGTCTGCGATAT  
CTTTGCGCGGGCCAATACTGGACAGCAGCAAGCCAGCCAAAGGACATGCGCCTCCC  
GCGACATCCGCATCTTCGCAGTAGCGTTGTGTCGTGATCCGAGCTGCACCGCTAGCG  
GGATCGATTTGCGCCGTGGTCAGGGTCTGGCCTCTGGCGTTATAGGACCACTCCTGT  
CTCTGGACCAATTTGCCCTGTTTCGGTCAGCGTATAAGCAAGCGGCAGACCAGAGTTG  
GGATCAACCTCGTAATTTGAGGATCGCAACACAGCCCCGCTATCAGCTGAGCCCTCT  
GACTTCCTGACCAAGATGCCATTTGAATCATAATCGTAGTCGTATAAATAACTACCC  
GCGCGCGAGACTTTGTCCAAGTTCCCCGCGTTGTGTCGTAGGAATAGGTCTCTAGCTGC  
TGAACGCATTTTGTGCAATCGGCCGCAAGAGTGGTGACTTTCTTCTGTCCATTGATA

GAAGTGAAACCTCGTGTCTCGGAACCGCCTGATGCTGTCTGGACGTGACTACCGCCA  
CCATCACCATAAGCAACAGAAAAAGCGGTTTACGCCACCGGCATGCTGGGTTGCAAC  
GGCTCTCCCTTTCTGATCGTAGAAGTAGGTCGCAAATCTATCCCCATTCTCGTCGAAT  
ATTCCAGTCAGAGCGCCCCGGAAGATCTGCGCCATCTGTGTAGTCTCGGGCGTTGTAT  
TCATACCTCCGGGAACCGGCCGAACGCGTGACCGAACCCAAGAAAGAAGAGCCGTC  
GTAAGCATAGGCAGCACCGTTCCCAGCAGAATCCGAGATGCCAGCGATCATCCCAC  
TGATGTCATACTGAAACGACAGCCACCTTCCCTCGTCATTCTTGACTTGAGAAATTCT  
TTTCCCAAGCTGCTCGGCCCCCTGGGAAGGCATAGCCAATTCTTATGCGCTGCCACC  
TCTTTGCAAAATATCGGTCAAACGTCCAAATGCATCATACTTCTCAACCTCGACCTTC  
TTAGCCGAGTTGTATTCCCAACCAATCGTTGCTCCTGCAGAGTCAACGACTGCCGTC  
AGTGAGCTTGATATTCCAGCGTTTGGCACCCACTGGCTACCTGACAGCGAAAATACT  
TCAACTCCGCCAGTTGGTCGGTAAATCTCGACTTTTGACACCCCATGACAGTCTTCA  
ACACCACACTGCGGCTATACGTATGTGTCCAAAAAGCGCCCAAGTCGCTGTTTGCCG  
AACCTGCCCCGATCACTGTTGTAATAACGCACAAATTTAGGCAGGCCAGCATCGTTCC  
AATCTGTCTCTACCTGGTATTTATTCCCGGTGCCGACATTAATGGGATTGCCGCAACT  
GAGGCTAGGCGACTGACAGGAAGGCGGCCCCCTGGCTTAAAGCTGGCTCATAATCAA  
CATCGTCCTCTGCAAATAAAGCGAGGTAATAGCATCCATCCGGGGTTGACCACTGGG  
AGCAGTAGCCTGCAACCTTATCGCCCTCCATGTATTCTTTAAAATAGGCTCCCATCTG  
GGGCATTTCGTTGCTGGTGGTAGTCCACCGCTTTTCCTAGCAAGCGCGGCCGCCATTGC  
GCGAGTGCATTTTGTGTTGGGCGTCCATAGCAAGCATCGCCTGGATAAGGCGGAAAAG  
TTCTTGCTCTGTAAAAAGATATCCAAAAACAATCATCTCCGTAATTTTCCAACGAA  
CGCACAGCGATGCGAATTCGTGCGCCAGGTGCAGCTGGCACATCGACCAGATATGGT  
TGGATGCTTGGAGGATAATTCTGAGGATCACTATAGTATTTTAGCCAACCATCGGCG  
ACTGCACTCGCCCGTGCAAACGAACAATCATCGGCTCGGCTAGCACAATGCGCATCT  
GGACCATCTGCTTGCGCTACCTGATTGAAAGCAAAAAACCAAGGCATATAAATAG  
CAAAGTTAAACTTATACGCTTTACGTCAACACGCAACCGCTGCGAAGTAGATTCCAT  
TCCGCCCTCAAATATTTATTTTCGCTACAACCCAATTTTGACGTGAGCTGCGGGCGGTT  
ATAGATCGTACAGCTTAGCACTTGCGGCTTACCGTCAGGAAGCGCTGTCATTGCCCG  
CTAGGCACGCGGGCCATTGCAGGAATGGAGGCAAGGTAGGGCCCTTATCTGGGTGT  
GCCAGCTGTAGGCCGGTGCTGTCAGCCTACACAAGGGGGCTATACCCACCCCCTTTC  
CGCCAGGCTGGTGTGCTGACGCCCACCGATGACCAAGTGGTCGAGGATGCGGATAT  
CGAGAAGTGCCAACGCTTGCGTCAAGCGATCGGTGATTTGCTGATCTGCATTGCTTG  
GCTCCGGATTACCCGAAGGGTGATTGTGGAAGAGGATGACGGCCGCAGCGTTCAAA  
TCCAGGGCGCGCTTGGCGACCACCCGAGGGTGCACCTCGCAGCCGTCGATGGTGCC  
GAAGAAGAGATGCTCGGTTGCCAGGATGTGATGCTTGATGTCCAGGAAGACGACCC  
CGAAGACTTCGTGACTCAGATGTGCGCAGCGGGCAATCAGGTAATCGCCGGCTTGCT  
CGGGGCTGTGGATGCGGCCTTGGCGTTGAAGGCGTTGTTCCAGGATGGTGGCTGCTG  
CGAGCAA

>CONTIG\_135\_length\_3693\_cov\_6.428772

GACCAGACGCGACAGCAGCAGATGGAGCAGACCCAGCATCAGACGACGACGAGCAGG  
AGCAAGGACCGCGCATGACCATTTAGCGGGAAAGCTGAATGGGACGACATGCAAGA  
ATTTTCGATTGAAGTTGTCGGTTGGCGAAGACTCAACGAACAGGGGGCGGCATGAGC  
ATAGTTGCGTATCGCGGCGGGAAGCAGATCACTGACGAGATAGAGCTTCAGGCTTA  
TCTCGCCTCTTTGTTGAGGCTAGAAAACGTCGGTTTATTACTCGGAGCTGGGGCCTC  
ATGCTCTGCCGGCGGTTCAGACGATGAGGACGCTGTGGAACAGCTTTTTGCTCGGCAA  
TAAGGTAGAGGCTGATTGGCTTCTGTCTCAGAAAGTTCATCAATGACGACGAAAGGA  
GGTTGCTGCCCTGCCACCTCCGCCCCTGCCAGCTGGAGTTGCTCCAGATCCACCCG  
CACTGTCCAACCCGGTCCCAGTCACAAGCCTGCCAACTTCGAAGTCCTTCTGGATA  
AGCTTGAGATTGCAATCCTTGAGTGGAGGCGACAGTCAAGTCCTGAACTTACCCAGG  
CTGAAAAGGTGAGAGCAGCGCTTTTTAGAGCTGTCGTAAGCGCTGCGAAGCTCAAG  
GAGGATTGGTGGAAGTCTCCCTTAGGTGCTGACTTGCCAATGAGCTGGGAGCCCAT  
CGCACGATTCTTCAAAAGCTCACCGCCGCACGCCAGCCTGGCCAGCCGGCCCCATG  
GGTCTTCACGACCAACTATGACTTGGCCATTGAGTGGGCGGCGGAGTCGGTAGACCT  
TCAGGTCATAAACGGCTTCCTTGGCGTGCATAGCCGTCGGTTTTACCTCAAAGCTTT  
GATCTCGGATTCCGCAATGCCCAAGCTAAAGGGGAGGCTCGTTTCGGCGTCTACAAC  
ATCTACTTAGCCAAGCTCCACGGATCACTGACCTGGAAGGAAGTGGACCACAGCCT  
GTATGAGGTTTCTGCGTCTGAAGCATGGCACGACATCTACAATTTTTTAGAAAGATT  
CGATGACACGCTGAGTTACTTGGTCCTGCCGCGTGCCGCGAAATACCTCCAGACCGT  
GGGTTATGTTATGGGCGAGCTGCTCCGCCGGTTCGCGGAGTTCATGGCCCGACCGCA  
GACAGCTCTCATAATCAGTGGCTATGGCTTCGGCGACGAGCACATCAATCGGCTCAT  
TCGCTCCGCCTTGCTCAACCCTACGCTCCAAGTGGTCGTCTATCTGCCAGAGTTCAA  
GGGTGACCCAGCTGATTCAGGCCTCCCGCAAACGGTACGGAGATTGCTCGCCCTAC  
AGACCCCCCGCTTGACTATCGTGGGGGGCGGTAGCAGGGCCTTCACCAACGCTTTGG  
CGGCCGACCTTCCTGACCCCACTATATATGACCAGGAAGTGGCGGACTTGCGTAGGC  
GTTTGATGCCCCGAGAAGCCCGACCTAGAGGAGGATGACGAGCTATGAGGAGCCGGC  
AGGCCATCGGCTACGTTGTCCAAATTGACGGCGTGGACATCACGCTAAATCTCATGG  
ATGTCCATCGCGGCCAGTTGGCAGCCCATGCGCACGGGGTCTCAGTTGTCACTGAGG  
TCGGAAGCCTCCTTGGGATCGAGTCAGGAGGCCGGTTGCTGGTAATGAAGGTTCACT  
CCTTGTCTTTGCTGAGCCCAAAGAGGTTACCGGTTTGGGCTCTCGGGAACATCGG  
TTGCTTCCGAGCCATTGCGTCATCTCACCGGGTTGGTGGTGGGTCGGCTGCGGCGTG  
ACACGGGAAAGCTGGCTTTCGTGTCTGACTCGCTTTCCTCGCCTGCGCTAGGCGCTG  
AGGCCTATCCGCTCACTGACGAAGAGCTGTCTTCGATTCTGCACAATTCTTTGGCCTC  
ACCGGCAGGCATTCACTTGGGGGATGACCTGCGGGGTGGCGGCCGTCTGATGGTGG  
ATCTAGAGAGTTTGGTTTCCAGGCATGTCGCGGTGCTTGGCAGTTCAGGACAAGGCA  
AGAGCTGCTTTACGGCTGCGGTGCTCCAGCAGGTCGCCAAGATGCCCAAGGCGCGG  
GTGGTCATCTTCGATATCAACGGCGAATACGAAGACGCTTTCCCCGCTGCCAGCTAT  
CCTCCGGGAGCCATCAAAGTCACACGCATCGGCGGGTCAGATCCAAATAGCTACCG  
TATCCCTTATTACGCGTTGGGTCGCTTGGGCCTGCAACGCCTGCTGTTGCCAGCGAT  
AAGACTCAACGGCCCCGCCCTGACCTTTGCTTTAGATCACCTCAACCAAGTGAAATGG

TTCCCCGGGGACGGTGGCGTGGGCCTAGCGACGGACACGCAAGCATCGTTGTTCTGA  
CGACTGTCGGAGTGACCGCGTATCCGAGGCGCAGACCATCATCGAAGGCCTTCGTG  
CAGGGATGCCACCGCCGGCGCTCTCTTGGCCTCCCATGCAGGCCCTCGGTCCCTTGA  
TTGCTGACAGCCACGCCATTGCTCCTGCGCGAAACGGCTTCGAACGCAGCGCCTGGA  
ACTACGGAAACATTGCCCCGCTCATTACTCGCATCGCCAGATTTCGTGGATGACGAGA  
TGTTCAAGGATGTGGTGAGCGTAGCTGGTGGCCCCGGGCTGCGGTGGTCCACTTAGCT  
GGAAAAACGAATCAAAAGCGGTGGTAGAGCGGCTGTTTGGTGGGGATGAGGTGGAC  
TGGCGGGTGCACATCGTCGACCTGCGCCGTGTATCGCATGACTTGACGCCATTCGTCTC  
TTAGGAGCTGTCTTGGAGCTATATGCGTTCGAGCTCTTCAGGCGGGGTCAGGAGAAC  
AAGCGGGAAACGCTGTTGGTGGTGGAGGAGGCGCACCACTACCTGCGGCAGATGGG  
GACAGGCGATGAAGCTGTGAACAATGCTCTGGCCTACGAGCGTCTAGCAAAGGAAG  
GGCGAAAATTTGGGTTGGCACTATGGCTCAGCACCCAGCGACCTTCAGAGATATCTC  
CGACCGTGCTTTCCCAAGTGTAAATACCTGGGTCTCCTTTTCGCCTGTCCTCGGAGAAGG  
ATCTTTCCGCGATCCAATCCGCAAGCGAGTGGGCCGATAAGCGTGAGGTGCGAAGG  
ATTGCTGGGCTTGCTCGTCAGAACGCTTTGGCTTTCGGTGGAAGCCTCCAGATGGCC  
ACTCTGATTAAAGCTCCAGTAGCTCATCCTCTCCCTCGTTCTGAAGACGGCCGCTTC  
AACAGCTGGGCTTCCGACGTGAGCGAAGAAGAGGAAGAGGGTTTTGGTGACTACCT  
GTGATGCGCTTGTCTCGTGGCACTCAGAGCGGCATGACTGCGCCCGACTACTTGCGT  
TGTATCAATGAAGTCTACCTTCCGGCGATTGATGCTTGCCGTTGACGTGCTCCCGGA  
GCAGTGACTCTAGTTCCTCGTCATCCAGTGCATGAGCGCCTGCCAGGAAAACCAGGT  
CAGCCACGCGCTGCCGTCGTTTGATTTCTTCTCGCTTCGCTGTTTCCTTCGCCTTCGCT  
TCGCGGCGCTGGTTGGCTAAAAGCTCTTTTCGCTTGACGCTGGGCCAAGCGCTCGGTG  
GCTCGTTGGATTTGGTCTCGGTAGTGATTGCTTGCGGTCATGCGTTTCTCCTGCCTTG  
TGGAATGAGTCAACCAGGAAAACGGCTTGCGTCAAGTTCGCGAAGATTCCATTTTT  
GACCTGCCGACGTCCCCCACCCTGAGTAGTGGCTTGGTTTAGAGTCCGGGGGTAAT  
GAT

>CONTIG\_136\_length\_3682\_cov\_20.597468

AGGCACCTGTTCAAAATCGTTCATTACGATGGATCTCCCTGTCCATTGGTTTGAAGC  
GCCATCATAGCTCCGCCAATCAACCCAATCTATGATGGGCCATGGTGACTCGCCCTA  
CCCCTACCTCATTACCAGCTTGGGCACCGCAAAAAGCTGCGGATTGGGCTCCCCTAG  
CTGTGTCTGCGGTGATTATCTTGACCATGACGGTAGCGCTAGCGCTTCGCACTGCTG  
ACGTAGAGAGCGCACCAAGATAAGACGACAGTAGAAACAGCAGCGAACTCATCAGT  
GACGCCCCCGCTCAATGCTGGAATACCTGCTTTTTTCGACCGAGCGCGTCGGTTCCCT  
AAGGCTGGTGCCCACTCAGCTGCCGCCGGTAAAGCAACCCCTGCAGGCCGACG  
AGCGATGCCCTCTGTCTGCTGCTGCTAACCCATCCCCTGAGGCCAAGGCGGCTATCA  
ACGCGGGCTGGCACGTCAGTGCGGACATGACGTTCAAAGGATTTTCGCTTCGTCATGG  
TGGACGCCGGTGCGAAGAAGGCTTCCGCTGGCTGCATGGCTATTGGAGCCAGCACTT  
TGATATTCAATGTCCACGGCCTCATTGCCATTGCTTACGACCGAAATGCCAAGCAGT  
CGTCCAGGTTGAGTTCGTTAACCATCGGGGAATCTGGTGCCTTACAGCTCGGAGCCT

TGAAAGGACCACTTGCTGAGGTCAGGGTCAGTGACCAGCAGATTGCTCTCAAGCGTT  
TGCCCAAGAGCAAGCTAAAGGGCTTCTGAGGACACGCCCTCGATATGACTCAAGAG  
TCGCCAAATAACTCTACTCATCCTGCTCGGCGCGTTACCCCTGCTGAGTGAAGCGAA  
GCACCAATACACCGTCACCAGCCGCTTCGAGAAGGCCTAGAGCTCCGGAACCTTCC  
AAGTCAGCTACTCCGCAGCTGGGCGAGTCACCGGTGGCAGCACTGTCTGAGCATA  
GGTAAGCGCACAGCAAACGGACAGCCAACATCTCTGCAGTATGGATGACCTTTCAC  
AGTTCCAGCGAGATGTATTGCTTGTTGCTGTGCCCCGCTAGTCCACTACTGGCAGGA  
ACTAGCCCCCTCTATGCCGGAGCTTCCCACAAAGTGCTAGGATTTACATAGGCCCTG  
GACTGGCCGGGGTTGCCAAGGAGATGGTAATGAGCTTTCCCGCAGATGTCTTTTATC  
CCGCTCAAGCTGAGCTTTTGCCCCGAAGGGACGTTGCTCTACGCTCGCGATGCGTGGT  
GGCTGCGATGCAGCCTGGTAGGAACGGCGGAAAATGTGGTGCCGAAGGTGCTGGCC  
CTGACGGGGGATAGAACTGGTGTTATGACCATGCTCGCGAATTCGGAAGTGCTGGCT  
GTGAACTCGAAATACGGCTGGGAAATTCGCATTCCCTCACCCACTGGATTTAGACTCC  
GAATCCAAAGTCATCGGATCAATCAGTGTTGGCGAAGGTAGCCTAATCGGAATCTG  
GGGGCACATTTACGGTGACACGGACGCACTGTATTGCATTGCTCCGGATGGCACTGC  
AGTCGCCAATGACCTAATCCCTTGGTCCGCGAAAAGTAAGGTATCCCGTCTACCACGT  
GTGGCTGCAAGAACGTCGGACCGGCAAGCTGATTGGCGACGCCCCGCTGTTTCAGCA  
AAGAATAGTAGTTAATCGTTACCTGCTGCCTTGCGCAGCAGGTTCTACTAGCCTCCCA  
TGAGCAGAATTTTCGCACCAGCCATATACTGACTGCGCCATAAGCCTGCAAAAAA  
GAGGCCGAGACTCGGAAAATCACTCGCTGCATAGGAATCACAGAAAGCCAATCTTT  
GTCAGTTATTAGACGTTTCGAGGACTGCCAATCCGCAGCCATTAATTTATTGCGCCAG  
CCTCATTTTCGAACAAGTAGAGAGACAATATGAGCCTACCGAAGGAGGCCAGATGTG  
ACCTACAACCAGCTTGCCAAGATTGCCTCTTCCTATGGGCTGCGAGATTCCATCATT  
CATATCTGGGCATACAGCTTACATGTCGGTTATGGACACAACCTCCCATTTGAGTAT  
GCGCACTCGCGGCAAGGTTTTCAAAATCAAATGAAGCCGAGCATCCAGGAGTTCTA  
CCTGGACCTCTACCTCAGAGAGGTGCTTCTTCACGCAGGTGCTTCGAAAGGCGCGCG  
CCGCTCGCTACGGGACTGGAATGACCTTGGCACACTCCATAACGCTATTTCGCAGCTA  
CAGCGATTTCAAAGCAAAGTGTGACTTAGACATCTGGACCACAATGCACCGTATCG  
GGCATCAACAGTTGCCTCATTTTCGATCGCTTCGGATCCTCATATCTTGGACGCTACTG  
GTCTCTCTACAAGCGTGGTCACCTCTCCGACGTCGTTTACAACGCATTGGGCCTAAC  
ATCCGAAGATTACTTTCTCTTCGCCGGAGCCACCCAAGCGCTCTTCATGAGCAACTA  
TGAAGTCCCGTTACTGCCACAGCTGACCGCACTCGACTTGGACGTCGCGGCAGTGAC  
AGCAAGGGTAGCTGCGATAACTGCCACGCCACGCTGTTGCGTAACCGCTGCCTCCT  
GGATGCGCGCCATGACTCGTCCTGGGACTACACCCCTAACCCTGTAGCGGTGAAACC  
CCTAATCCTACTTCGATCCGACGCCCCGGCTAGGCTGTCCTGTCCACGCCCCGTCACTT  
CTGGGCAAGCGACTACTCGCAGGACTCTTTTATGACCTTGCGAACGCGGAAGGCTTT  
GCCCAAGCCTACGGGGATGCATTTCGAGGATTTGGTGGGCGACTGCTTTGGCCACCTC  
ACGGGCACGACGATCGCTGAGCGCCCCACCCCCTACACGGTGGCAGGTTACAGCG  
ACACGGTAGCGACTGGATTCTCAAAGACGCAGCCACCACTGTCTTCGTGGAATGCA  
AGACCATGAGGATGCCCATCTCGGCACAGCTTGCGGCTAGCCCTGGCGATTTGGAG

CACGGCCTGAAGCGCCTAGCCCAAGCCGTAGTCCAGAATTACCGAAATATCATCGA  
CGTGACGTCAAACCACGTAGGAATCAAACCTGCCAGATGGGCCAATCTATTCCCTAAT  
TGTCACCCTTGAAGACTGGATCCTATTTGGTCAGAAGGCAGTAGACGCCCTTACCAG  
ACTGGTGGCGCAGGAGCTATGCGAGCGCGGGATGGATGCCAGTATCGCGCAACGTT  
ACCCATTTGCCATTATCGGATGCGCGGCATTGCCACGGGTGGTCGACTCAATCAGCG  
AGCATGGGCTACATATCTTCACGGACAAAGCCTCTCAGCGATTCAACGGCTACTTTT  
TTCCGCAGTTTTTTGGACGAGGCTAACCTATTCAGCAAGGGGGCCGGCGGCCGCAATGT  
TTGACGGCGAATGGAAAGATTTGATGGAGCGCCTCAGAATTCGATTCCCGATGGCAT  
CGGGTCAATAATCTGACAACTGTGGAACATCGCCTTTATCGCACCTACTTTTCGACGC  
GCCCATTTCTCTTCACTAGAAATCATCACGAAATCAGAACCAACCGACCTTTCTACC  
TGCTCTAATTCCTCATGTTGCGCTATCGAAGAACCATCCAAAAACACATCCGGCATG  
GGCTCTGATACGCCCAGGGTTTCCTAGACATCTCAAGGCCATGGAAAATAGTCGATT  
CGGAGGTGTCTATGAGCAGCAAGCGATATACGGATGAGTTCAAGATCGAGGC

>CONTIG\_137\_length\_3664\_cov\_10.104326

CCGCTTTCGGCTTCGCGCAGAAAGCCGATGACCTGCTCGTCAGTAAAACGTTTCTTC  
ACGTCCAATCTCCTCGGGGTAGGGAATTGGACTCCAAACTGGGGCGCTACTCAAAT  
TGGGTGGACGTCGCCGTGGACATCGATTGCTGCGAATGCATCATCGAGCTCGCGCAG  
ATCGGCCGGCGTTAGCGTCAGGTCAGCTGCCGGCAGGTTGTCTGGCGAGATGCGCGG  
GTTGTTGTGCACCCGGAATCGGCACGATATAAGGGCGTTGGTGCAGCAGCCAGGAA  
AGCGCGATCTGCGAGGGAGTGATGCCTTTTCGTGTGGCAAGCTCCTTAAGAAAGTCG  
ACGACAACGAAGTTCGCCTCCAACGCTTCCGGCGTGAATCGCGGAAAGGTGGCACG  
CAAGTCGGTGGCCGCGTCGAACGTGGTATCGCGGGTGATCTTGCCGGTCAAGAAGC  
CCTGGCCCAGCGGACCCACGGAACGAAGCCAATTCCCAGTTCGTGCGACAGCGGC  
AGGAGTTCTGCCTCCGGTTCGCGCATCCACAGCGAGTAGTGATACTGCAATGCAGTC  
AGCGGCTGCACCAAATGGGCACGGCGGATGTTTTGGATGCTGGCCTCCGAAAGACC  
GAAGTGCTTGACCTTGCCCTCCTGGATCAGATCACGCACGGCACCGGCGACCTCTTC  
CATGGGCACGTTTCGGATCGACCCGATGCTGGTAAAGCAGATCGATGTAATCGGTCC  
GAAGGCGCTTGAGCGAGGCTTCAACGACTTTGCGGATGTGCTCAGGACGGCTGTTG  
AGCCCGACCGTCTGGCCGTCCTCGTTGATGTCTGAAGCCGAACTTGGTGGCGATCACG  
ACGCGGTGCGGCATAGGCACGAGCGCCTCGCCGACCAGTTCTTCGTTTGTGTAGGGG  
CCATAGCCTTCGGCTGTGTCTGAAGAAGGTGACACCGCGATCGAAGGCACTGCGGAT  
GACCGCCACGCCTTCGCTCCTGTCCACGGCCGGGCCCAGACCGAAGCTCAGGCCCAT  
GCAGCCCAAACCGATGGCGGAGACTTCGAGGCCGGTGTGTCGCAATGTGCGGGTCT  
TCATGTCAAGGTCCAGCGAGAGAGTCAGCAAAGTCTCCTCCTCGCCCCGCCCTTCCAT  
TAAGATGCTAAATCCGCAAGCAGTTATCAGTCAGGCGACATAGTCGCTACCATTCTGA  
AAATGGCCCCGGGACCACTACAGCGACCTTGTCGCGTTTCTTACCGTCGCTAGGGAGC  
GCAGCTTCACGCGTGCGGCGGCTCAACTGGGCATGTCCAGTCCGCTTGAGCCAGA  
CGATCCGGGCGTTAGAGGCGCAACTGGGGGTGCGCCTTCTGACGAGAACCACGCGG  
AGCGTGTCCCCTACAGATGCTGGCGAGCGGCTGTTGCTGACGATCGGCCCCGAACCTT

GAGGCCATTGATGCCGAGCTTGGCGCCTTGAGCGAGTTCAAGGACAAACCGAGCGG  
CACCATCCGCATCACCACAAGCGAGCACGCCGCCGACACTGTCCTGTGGCCAGCTCT  
GCGCCGGCTGCTGCCCCGATTACCCTGACATCCGGGTCGAACTGGTCACCGACGCCGG  
GCTGACCGACATTGTCTGCTGAGCGTTACGACGCTGGTGTTCGACTTGGTGAAGCGTT  
GGCCAAGGACATGATCGCGGTGCCGATTGGCCCACCGATGAGCATGGCGGTGGTGG  
GTGCCCCGTCTACTTCGCTGCTCGGCCGCAGCCCCGAGACCCACACGAACTGCCCC  
AGCACAGCTGCATCAATCTACGACTGCCGACCTATGGCGGTTTGTATGCCTGGGAGT  
TTGAAGAGCGCGCTCGCTCATTCCGTGTTCGCGTCGAGGGCCAGGTCGTGTTCAATG  
GACTCCGCCAAAGCCACCGCGCGGGCGCTGGACGGGTTTGGGTTGGCCTACCTGCCC  
GAGGACATGGTGC GCGCAGACATCGCAGCCGGGCGTCTGTCTCACGTGCTTGCGGA  
TTGGTGCCCCCATTTCCCGGCTATCACCTCTACTACCCAGTCGTCGGCAGCCCTCA  
GCAGCATTTCTCGTCGTCGTGGACGCCCTACGCTACCGGCGGTGAGCAGGTAATTAT  
CCGGTGCCCCCTTATAGGAGCATTTCGGATTTTTCGGGGCTAATCAAAACGCACCTCGAC  
TCCTAGAGTGGCTAGCTCCAATCGGTGCATGGCTGCGGACTTCGCCGGCCCATATCA  
GGATCCCGGCACCGCCGCAGCTAGCCCAGGGCCAGCCGAGAATGCTCAACGGCTCA  
TGGCAACACCGTCCGGTTTGGCAAGGTGCACGGCAAAAACCCGCCGATTTTTTCGAA  
GCTGGTGCCTGGTCCATACCTGCCCTTGACCCATTTGAAGGAGATCAACGTGCCAAC  
CACCGTGAACGCCTACGCCGCACACGCATCCGACGGCGACCTTACCCCGTGGTTCCTT  
TGAAAGACGCGACCTTAGGCCTGACGACGTGGAGATCGACGTGCTGTTCTGCGGCG  
TCTGCCACTCGGACGTGCACCACGTGCGAAATGACTGGGGCGGGCAGACATATCCG  
ATCGTCCCCGGTCACGAAATCATCGGCACGGTAAAACGTGTGCGGAGCTTCAGTGAC  
CCAATTCCATGTAGGCGAGATGGTCGGAGTTGGCTGCCTGGTAGATTCGTGTGCGAC  
CTGCGGGGCATGCACTGCGCAGCTCGAGCAATACTGCCAACAAGGCAGCACTTTGA  
CTTATGCCGGCAAGGACCGGCATGACGGCACACCAACCTACGGTGGCTACTCGAAC  
AGCATCGTCGTCAGCGACGCGTTCGTCTTCGTGTGCCAGCTGGACTGGACCCCGCA  
GGCGCGGCCCCGCTGTTGTGTGCGGGGATTACGACTTATTCTCCGCTACGGCGTTGG  
GGTGCAGGGCCTGGGCGTAAGGTTGCAGTGGTTCGGTCTAGGAGGACTAGGACACAT  
GGCGCTTAAGATCGCCAAAGCGATGGGCGCAGAAGTAACGTTGTTTAGCCGCTCAC  
CAGGCAAGGAGGTAGACGCACGCCGCCTTGGTGCGGACCACGTGGTCATCTCCGGC  
AGTGCCGACCAGATGGCCGCTGCGGCCGGAACCTTTGACCTGATTATCGACACCGTC  
CCGTATGCGCATGATCTCAATCCGTATATCGCGACACTAGCCGCGCAGGGGACAATT  
GTGTTGGTGGGCTACCTTGGTGAACCTGGACGAAGCACTGAATACCGCACCTATGGTT  
TTTCGTGGACGCTCTGTGGGCGCCTCACTGATTGGCGGTATCGCCGAAACGCAGGAA  
ATGCTCGACTTCTGTTCCGATCACAACATCACCTCAGACGTTGAAATCATCGAGATT  
AAAGACATCAACGACGCCTACAACCGCATGCTCAAAAGCGACGTGAAGTATCGCTT  
CGTTATCGACATGGGAAGCCTCGAGAAACAATGAGGCTTGCGTAAGCTGCGCCCGA  
ATATTGCCGAATGAACTACGGCCCCAATGCTTACGAATTCTCAACTGCGTAACGCAG  
GTGCATCACACCTGCGTTACGTGGAGTTGCTGATACGCCAGGGTTTCCTAGACATC  
TCAAGGCCATGGAAAATAGTCGATTTCGGAGGTGTCTATGAGCAGCAAGCGATATAC  
GGATGAGTTCAAGATCGAGGCGGTCCGGCAAGTGACTGATCGT

>CONTIG\_138\_length\_3651\_cov\_276.307889

GTTTAAGCGCTAGAGCGTTCTGCTACGTGTAGCGTCATCTTGCGTTTGCGCTTGCTGC  
ACCTGACGCTGACTTTCCTCAGCCACTTGCCGGCTGCTGCGTTCCAACGGCTGAGTC  
TGCGCTTGATCGCGATCTACGAACACACGACGCATTGCCGGGTCGCTCATCTCGCCC  
TGCACCGCAAAAAATCCATCGCCACTCTTGTTGGGCACTACATGGTCGATACGTTGT  
AATCCGCTGACCTTGGCCTCAAACACAATCTGCCCCGCCGCTTGCTGCAGTTCTTGC  
CGGTTGGAGAAACCACCGCGCTCGCCCAGGGCTTCCAGTTTGCTCACTGTGCCGTTG  
TACATCGCGTCGTCTGGATGGCGCGGGTCGGAGAGCAAGGGAGTGCCGGTCGATGC  
AATCAGTGCAGCTTGCGTTGTTGACTGTTGCGCCTGCTTGGCCGCGTGCTGCGACAA  
CGCTTGGCCCAATACAGCCTGCGTACGCTGGCCAACAACACCATCCACCTGCAGACC  
GTGCTCACGCTGAACTGCTCCACGGCATGCCTGGTATTGCCACCAAAATCACCATC  
GGCTTGCAACGGCTTGTCGTAGCGACCTGTGGCGCCGAGTTGCGCAAGCTGACTTTG  
TAGTTTCTTGACTGACTCGCCACGCTCACCTTGTTCCAGCTGGCTGTCGTGCGATTTC  
GCATCGTGATGAGAGGTCGAGCTAGGTGCTACGCTGGCTTTGAGATCAACACCATCG  
CGCTTGACACTTTCAATTAAATCAGGAACTCGGCGCTCCCAACTTTCCGCGTGCTTCT  
GGCAATCTTTGGCTGCTTCTATACTCCAAGGCTTGCTGGGCGTAACACCATTTACTAC  
ACGTCTTGCGTTGTAGACGTCATGGCTGTCACTATCGATGTATCGATCAAGAGGCTT  
GCCAGTAAACAAGCCATCGCGCATACCAACAACCAAACTTTTGCAGCGATTTCCG  
GGTCCTTCGCCAAGTCCGGGTACGGACCATTCTCCGTTGAGACCCAGCAACTTGT  
CGAACTTCGCATAGTTGTAGTCGTGCGTGAGGTGCACGTAGCCACGGCCATAGAATT  
CTTCGCCGCCGCTATAGCCAAGCTTGCGCGCTTGGCTTCGCCCCGAAATCCTCTTCAG  
GCGCCTGAAAGTTACGCGTTTCGTGCTGGGCCGTCGCCAGCATGTACGATATTTGTT  
TTGGATCCTTCACACCGTTTTTCGAGAGCGGTCTTGACAATCAATCTAACGGAAGACT  
CCCGATCCACACCAAAGCCTTCTGTGCTACGACCACGTCCATCACTCATAGTATTCT  
CCGTACGTGCATGTCATTAGAATTTGTTGTTGCATCGCCGGCATTGGAAATCCGAAG  
ATACGTTGCATGTACTTGCCACAAACAATTTACAAGCTTCCTAGCGGGCCACCTCCT  
TCATCTCACCATTTTGAAGACGCTCGGTCTTCTTCTTTGGGTTAGCCGGATCATTGGT  
GTCTTCGGTTACCCGCTCGACCAGCACTACCTCATCTTTCCTAAACTCGTAAGTATCG  
AACACATGGAGACAGCACCCATCGCCAGAGGCGGACGTCAGCACATTCCCTTTCAC  
TGAAAACAGACCATTTGCCATCACTGTGATATCGGATAGCGACTGATTGAAGATGA  
GGCGCTGCTCTGTGCGATTAAAAAGATAGACGCTATAAGAAGGACCACCATAATTA  
CCTTCCTTGCCAGACCAGACTATTAAATCTTCATGCCCATCGCCGTTGATGTCAGTCA  
AAATAATGGAATGACGATTTTTTTTTGTAGCGTTCATCCAGAGGACCATGGTAAAGCG  
TCGAATTACCATCCAGATACAGCGCTTCTGGCTCTACCGCAATCGACTTACCACCCG  
GGAAAGTCACCTCTACAACCAGTGAGCGATTACAAAGCATGATGCCTGGACTATCCT  
CGTTGCAGCCCTGCGCCTTGATAACCAAAGTGATATCACTGATCTTCGTCCTGATCTC  
ACCCTTGTCGTTGAGTTTGGCACTGACAGTAGATGGCATTTTCAAATCCTTTCGTGAA  
ACAGATTGATGCGTCACGCCAGCTTGATCAGCGGCAGTTGCATTTTTTTCTTTGACAT  
CTGTATCAGGCACTGCAGCTGGACTACAAGCTGCAAGCAAAAGAAAGAATATTGGA  
ATTGTCTGCGCCACAAATTTAATTAGCTTACACATATCAATATGAACCAATTTTATTA

ATACATGAATTTCTACCTAAGAATATTATTAATATAAAATTTTCACAGTACACTCTAAT  
ACCTTTTAAATATTGGATCGGTACATTTTGATAGTGTAACTTTGCAATGACGCCCTGA  
ATTTTTTTCGCACTGCTTGATTGCTGATCGGGATGCTTCTTCTATGCTAGCAGCACTA  
AACATAGAACCTTGACCTTGTCCTGAGTCTGCTGCAGCAACGCATTGGTTAAAGAAA  
GCCATACTCACCCTGCAGCTACCTGAGCCTAGACCTTCGCAACTGGCAATTGCGTCA  
TTTTTCGGCTTGTTCTTTGGTTCTACGCCCAGAGCTCACGCCTGCATCACCGCTTCCAG  
AAGTAGCAACCGCGCCCCATGTTTTAATCCATTACCTGTCGGTCTAGGGGGAGGAG  
TTGGGATATCTCCTCGTGAGGTGCCAGAGTCGGACCGCATTGCGGGCTTCCCGGGGC  
AACTCCTGCTGGGACGCAAGTTTGGCCAAAAGCTTCAGTAAAAAATACACATGAAA  
GCAACAGAGCAGAACATATTAGAGAGAATTTCTTCATATCGCCTTTAACCTCAAATA  
GCGGCTTTGCCAAGCTTACCAGTTTGGTTATTAATTTTCAGATGGAGCATCAGAATAA  
GCGGTGCGCCACCCGTCGATGGCTGAGTGTCTGACCTTCGGTATTTCTGGCCGGC  
GCGCCGGGCTCATAAGGTCTTCCAGCCGCAGGCGACTGACCCGGTCGGTCCAACCTG  
CCCCAGCGCCGAGTACGCCGTGAACTGGCCCAGCGTGCCCTGGAAGAAGGCCGCCG  
CCATCGGCGGTGCGGTGATGATCAACGTGGTCAGTACCAAGCCCAATCCTCCTTGCT  
GCAATGCCATGCTGCCGATGCCTTCGCCGGTAAAACCGTTCAGTGCCCACTTCGCTA  
CAAAGGCCGCACCCACCGCACCCACCACCTTGGTCGCCAGGCTCACCGTGAAGGTC  
AGCACCGACAGCGAGAAAAATGGTGCCGATGCCGTACAACAGCCATTTGCTGAACAA  
CGACTTCGTTGCCTGAAATAGCAGACACAGGATGAACAACGGCCCAAACCCACCA  
CCAACGCCATCGCGATCTTGTTTCAGCAGCCGCATCGAGCCGGCCACCACGCCCGGG  
CCGGCCATGCCGATGCCGGTAAACCAACGCGCACGGGTCTTCTGGTCTTCGCCGTTC  
TTGTCCCCAGCTGTCTGGATCTGATCCAGGCCGGTCATTGCCACCTGCATCAGCATC  
AGGTTCTTGTCGATCGCCTCGTATGGGCTGTCCGAATCGCCGGTCACCGTCTTGGTG  
ATCGCCTCGCTGATGCCATCGGTCAGGGTCCAGTACAGCTGCGGTGAACCCTGCGCC  
ATGCTGGTGACAAACACAATGGCCTTGGCAGTGCCAAGGCCATTGCTTGAGCGTTAG  
AG

>CONTIG\_139\_length\_3572\_cov\_54.691147

CACCGGCTTGGGGTGCTACGCACCGATGCCGCGTGCCGCGTCATCGCCAGTCGGCCC  
TAATCCTCGCCCCGGCGCGCTCCGCTTGCAAGCAAAACCGCGCCCCGTCCAGCAC  
GCCGTTTTCCGACCAGCGCCGCGATGACCAGCGTCGCCAGGGCCAATGCCCGGCAT  
CCAGCACCCCGGCTCGATGCGTGCTCATAGTGCCTTCCTTCGCATCGACGCAGCG  
TTATTGATCGCCAGCATGCCCCGAACATCGCATGGCGCGGGCCGCCGTGCTAGGGCG  
AATCCTCACCCGTTTCGCACTCCCTGCGGTTCGCTTGCGCTGCGGCTTCCGGGTTC  
TTGCACGCCAACCTTATCCGCCATGCGCCTGATCGGTGCGCGATCAATAACCCCGCG  
CCGAAAGGAACGCACTATGAAAAAACGCACGCATCAAGCCCTCACAACGGTGCTGG  
AAAACCTTGCCGGCCATCATCACGGCCCTGGCGACGCTGGTCACAGCCATCGCGGCG  
CTGGTCGAAAAACTCAACTAAGGAGGAACGGGGCGAAAGCCCCGTTTTTCGCTTCG  
CTGCATCCGCCAAGAGCAACAGCAAAGCACGCCAGCGCAGATCCACATGCCAGGCG  
GGGGCGCGGCCGCACGCGGCCACCGGCTTGGGGTGCTGCGCACCGATGCCGCGTGC

CGCGTCATCGCCAGTCGGCCCTAATCCTCGCCCCGGCGCGCTCCGCTTGCAGAAGCG  
CGCCGGCATCGGCTGCGCCGATCAGCAGCGTCGCCCCCGCTTGCCCACCGCTACCG  
GCGACCAGGTGGACGGCACCACCTGGTCGCCGGCGGCCGTTGGCCGCACGCCGAGG  
ACAAGCCGGGGACGAGCTGCAATAGGCAGGCCCCGCCACCCGTGACCCACCGCTCC  
CCCGACGCCTGGGGATGGATACAACCATCCCCACGGCGACGGGCAGCGCTGGCGC  
GCTGGCCGTGGATCACGCGTGGACGGCCGCGATGTTGGCAAAGCGGGTCAGCAGG  
GAGTGATGTGGCCGGCCTGGTGGCGCGTGCTGCCCTTTGCACGTGATCGAGCTTCGG  
GCCGTGGCTTGGGTAGAGCGTTGCCGGGGACCAGGCGCAGCGATCGACCAGGTGCA  
TGGACCCCCGGAGCCAGATCGAGCGCAGGCCGTTCCATGCGGGGGCGTGATGAGCT  
AGCATCGTGGTGTGCAAACACACTGCACACCAAGCACGTATCCAATTGCCAGGAGA  
GTGACGACGATGGCCAAGACCGAATCCAAAGCACCGGCACCGGCACCAGAGCAGC  
ACGAACGCGATCGCTTCGACGTGGTTGCACCACACCCGTACACCAAGCGCGGCGGA  
GAAGCAGGCACCGAGTGGTTCCGCTGCGGTGTTGCGTTCCCTAACCAGGGCGGTGG  
CTATACGCTCAAGCTGCGCACCCGTCCCGGTGGCGATCGACGGCGAAATCACGCTGA  
TCGTGAAGAAGCGCGAGCCGAGGGACAAAGGCGAAGATTGGAACCTGCCGGAGTA  
AACCGGGCGGAACCTCGCCCATCAGCAAAAAGCCGTCGGAGATCCCGGCGGCTTTTT  
TGTGCCTCAGTGCCGCAGATCCACCCAGGCATCGGGCGGCGGCAACATGTTTTTGCC  
GGTGCCCTTGACAGGGCTTACACGTCACCCTCTCAGTGAGGCCGGGCCAACCACCCTC  
CCCGCCGCACATTGGGCATTCTGTCATCGGGAGCCTCTTGTTCTTGTCATGTGTGTCGCC  
CTCGCCAGTGATGGGCGAAGTGTGGCACGCGCACACGTGGCTGCGCTGCCGGCGAC  
GGCCAATCGCAAAAGCGGGTTTGACAGGGTGATGTGTGCGGCCTGGTCATGCATGCC  
GGCCTTGTCACGTGATCGAGCTTCGGGCGGTGGGCTGGGCAAAGCGTTGCCGGGGA  
CCAAGCGCAGCGATCGACCGGGTGACCGACCCCCTGAGTTTTACCCGGCGCAGGT  
GTTCCAAGGGCAGAACGCAGTGTGTGCATGCATGCATGTTTGCATGCTTGCATGCAT  
GCATGCAACTGGCTAATATGGAGTTGTGCAAAGACATTGCACACCTTGCAGAAAGCC  
AACGGAGATAACTGCCATGTTTACAGCGTCTGACATCATCCATTGCGACACCCGCGC  
CAACCTGTTGGAGGACGGCGACCTGGTGGACGTGTCTGCCCTCGCCCGCGAGGCCG  
GCTTTAAGGTGCCGGTTGCCGTCACGCGGGCCGTCTGGGCCGACTGCGTGGCATGGA  
GCCAGGAGGACACCAAGCGCAAGCATGTGCCGCAGGACGAGCAAGGCCGGCTGTG  
GGATGTGCTGTTTCATGGCGCGCAACTTCGCCGCCCGTGCGGCTGACGCCAACC GCGT  
GCCGTTTCGCCCTGCATCGGGTGCCCCGTGAGGGCCGAGGCCACCAGGCCCGCATTGT  
GACCCTGCACATGCACATCGGCCCCGGCGACGATGCCGAGCCGGTCATCACCATCA  
TGCAGCCCACCGAAGACTGACCCCCTTTTTTTTGCCTAGTGGTGTGCAATGGTATTGC  
ACACCACTGGCCGGAACGATCGAGGAACCGACGATGGACCAGGCCAAGACCACCG  
AGCAGATCCACGGCGTGAGTGTTGACGCCGGTCTGCGCCAAGCCCGCGCCGTACTC  
GCAGAGCTGACCGACTTCGTGCGGTCAACGCCATGCCTTTGCTGCCCAGCGTTGCCG  
CCACTGCCTGCGATCCAGTGCGAGCGCTGCCGGCTTCTGGATCGTGTTGGCGGTGCC  
GCATGACTGCCGCCGACAACGTGCGTGCACTGATCGCCGACCACCGCCGCCATGAG  
CGCGCCTGCCGGGCGCATGCAGCGCGCTTGCGCCGCGAAGCCCAGCAGCTGCGCGA  
GCTGCCCCGCCGGAGGCGCACGCAGCCTGTTCCGCGCCCACGAGCTGGCACGCAAAG

CGATCGCACTCACCGAACAAGCCGACCACGACCGCGCCGCGCTGCGCTGTTGGCC  
AACACCCCCAACCCTGACCAGGACACACCGCCATGCGCAAGCTACCCACCCCGC  
CTCCCTCACTGCCGCCGAGCGTGCGCAGTGGCGTGATGACCTCACAGGTCCGCGCTA  
TGCCCACCAGCCGCACGACTTGGCCGACGGCTCCCGCTACTACGTTGCCGAAGAACT  
CGGCCGCATCATCGTGACCGAGTTTCACGGCAAGAGCTTGAAGCTGGACCGCTATTC  
GTTCCGCTCGCAGGCCGAGGCCGACGCCGAAATTGCCCGGTTCACTGAGCGCCGGC  
AGCGCGTTGCCGACGCCACGCCGAACGCCGCGCAGAAGCCAAGCGGCCGCACACG  
CTGGAAGTGGGGGCCGTGCTGGTGTCCAGCTACGGCTACGAGCAAACCAACGTGGA  
TTTTTACGAAGTCGTCGCCGTGCGAATCGCACCGTGACCCTGCGCGAGCTGGTCCA  
GGAGCGGCAGGACACCGGCAACATGTCCGGCACCACCACCCCGGTTCCAGGCCAGT  
ACACGAAGGCCGAGCCGATCCGCAAGCGCGTCAACCCCGCAATGGCGTCAAGCTG  
TCCAGCAGCAGCTACGCCACCC

>CONTIG\_140\_length\_3525\_cov\_13.804002

AACTTATACAGCGCAGCAAGTTCTTCGTTTCGTGGCGCCATGGTCACACCGTAAAAA  
GTGAGTAATAGTGCATAATTCAACCAGTTGCGGAATTGTATTCCACTTGACCACCCG  
TTTGCAATTGCCGCTGGCCAGTCATTTGCATTCGAGGTGACCAAGCGTTGCACGAGAA  
TTGACCGGCGCACTGCATGTCCTCGACCAGCTGGAGTCTACCCGAAGCAGGCCTTCG  
TTAAGGGCTGCTAACGGCAGATAGCTGCGGGCTCTCGAACGACCGCGTTTCGGCCGATT  
CTGTTGAAAAAGTCGGGAGTGGTTTGCACAGCAGAAAAAGTACGCGGCTGAGCTTAA  
AACTAGAATCTGCGCAGAGGTATTGGGATTCAAATTTACGTGGCAGCGCATTA  
AAAGACGCTTTCACCGATCAATATGCTGGCAGTTTGAGAAAACCGTCTTTTTCAACA  
GAATCGGCCAGAAGCTGTCCCTGGATGGGTCTACAAAAGTGGGAAAGATTTACCTC  
GTGTAGCCGGCGATGTCCGGTGATGGGTGATTTATTGCCTATGTGGCAGTATCCAGC  
AAGCCATTGGGCGCGCAGGTCTTTCTAACAGTCCATGCTATTTTCATAAACCTTCAG  
TGATGCCCGCAGGCCGAACGGGAAACAGACTGTATGAATTTCCGAGCTCTTGTCTCC  
CTGAAATTATTGATTTGAGAGGCATAGGGCTATTAGCCAGTGGTAAGATGACCATT  
GCCACAAGGAGTTGTGTCTATGCCTACAATTTTTCTCAGTCATAATTACAACGATAAG  
CCAGTTGTTGAACCAGTCGCAATTCAACTTCGTAATATTTATGGTCAAAACGCTATTT  
TTTACGATGATTGGTCTATCCAGCCAGGTGACGGCATTATTGACCGAATGAACAACG  
GGCTCGCCACTCCTGACTTCTTTTTCTTTTTTCGTAAGTAAAGAGCAA  
TATGGTAAAGCTAGAGTGGCAAAGCGCCCTCTATCAAGCGACTAAAGGAAATGTAG  
TTTTCGTTCCGGTTCGAGTTGACGGCGCCCCAATGCCGTCAATTATTATGCAAAACA  
GTTACATAGATATGCATACCAACGGCGTTTTAGCTGCTATTCAGCAAATTAAAGATC  
GGATTTACAGGCGACTCTGAATTCAAGCCAAAACACGAAAATTTCTCCAACCTTAACCT  
TCAGCATATCCGGAGACCCTAAAGAGCAGCTGCGAGTTACGATCATAGCCTCTCATC  
TGCAAGAGTTAAATCCGAAATTTATGTTTATGGTAAAGAACAATAAAGATGAGGTCT  
TCGTCTGGATTGAAGGTGCTTCTGCAGTTCACTCCGGGCCAAATAACTATCATGAGG  
TCGAAGGTGCTGGAGAAGTGGCTGGAATGGTTTTCGCTCCATTTAATGGCACTATCA  
GGCCAAGCTTCCCTCTCACATTCACAATCACGCCAAAGCAAGACTGTAAACCAGTG

GAGTTTTTTGGGGGTTCTCCACGAGACCAAAGCTAATTGGTTTGAGCCTATCCCTCCA  
TCGGCTGGAACCCAATAAGATTATGGGCTCTGCGGCGCGGCTAAGCATCCGCCTTTG  
GCCAACTCCCGTCTCCCGTCTTTTATTACCGGCGGGAGTCGACCAGAAGCAGACATA  
GAGGTGAAATTCCCCGGGGCAGCTTTGCGCTCTTATCTCGGCCACTCGTAAAGTCGA  
TACCTGCCGACGAGAGCGGCCTCGCTTTTCGCTCTGCCTTCGCACTTCATTATTCGAA  
ACTCAACATTACAGATGAGGGAGCTTTTTACCGAACAGCTTCTCTTGGCGCTTTTTTC  
TGCACCTTAATTGCTCTGTTGCTGATCTCCCGACTTATCGTCGGCATAAACGCCGTGA  
AGATGGCTGTTGGTGCTACCGAGGCTTCGGACCATATGTCAAAACGGCCATCGACG  
ATCTTCATAAACAGAATGGACGCGCTCCAGAAATCCTCCTGCCGTTGGGCATTTAGC  
ATCTTTGCATACCAAGTCTTTGCCCAAATATTCCTTGCATACGAATCGCTCGCAGTTG  
AGTGGGCATTGCCGATGAATCCCTTGGTGCCGTCGAAGCGGGACAGAACCGCCTCA  
GCGTGGACGCTATCGTCGAAAAGCCTGCAATCATTAGCGCAAGTGCTGTCTCGTAC  
GGCCGGTCCGTGGCAAGAAGCTCATCAATGTAGGCCTGTAGAATTGCCACCTTTCCG  
CAAAGATGGGCTGCGATGACCTCGCGCGCGATGTCGCTGTCGCTTTGCGGTGTTTCGT  
AGGCGCTTTTTGCATATGTCTACCATCGACGGGCTAGCAGTGCTGCCCCATAGGACA  
ATGGCCTCTACAGGGATTTTTGCAGCGCCGGTGACACGGCGTATGGTCGGTTCCAAT  
GCCAAAATGCGGGTAATAAACTCAGGTGGTAACGGATTGCCGCTTGTGCTGAGTGC  
GACCGCTACCTGTAGGGCGACGTGGTGAAGATGACGGAGCTTTCGATCGGAGGTGG  
CTACCAACATCCTGAGCCAGCGCTGATCGCGATCAGAATCCTGTCCGATGATCGATT  
TGATGCCGTCGAACGTGAGGTCGGAGAGTATTAGGTCCGCTTCAACAGCCGTAAGCT  
CACCGGCAAAGCGTTTCATAGGCGTCGTTTCATGCGGCGCTGGCGCTCGTCGAACTGTT  
TTTCCGTTTCCGAAAGCCGATTCATCTGGGATGTGAAGTCGTTTTCCGACGGAGCCC  
GTTCCGTAAACGAAACCAGGGGAGGCGTGAGGTCGGATGCTGTCGGTGCCCCAGTC  
TCAATCTCCGGCAACTCCACATTACCCTCATAGTCCAATGCCTTCACAAGCGCGGCC  
TCGATGCGAGCCGCGATGGCATCATTCTGTTCTGCAGGTAGCGTTTTCGGCGGCGAAC  
CCGTAGTGGGACACGTTTCATTCGATCAAGCGCGGACTCCATCTCTATCAGGCCCGCT  
TCCATCGCTTTCAATATCGCAGTGGAACCCGTGCCATTCCTCGAAACTGCTGTTGCGCT  
TGTTCCGGCTTTTCCGCGCTCCATCCACTATCTATGACTTCTTTTAGTAATGCATTTTCG  
CCGCTCAATGCGGCGAGGGCGAGGGCTTCATGCCGGAGATTTTTGAGTGAGATCG  
GATGAAGCTTTTGACCATACTGACAGCGCGCGGTGTGAGCGGCGATTTAGAATAGT  
GGATTGCGGCAAGAACTGCTGTCTGCGCATGCTCATTTCCTCTGCAGAATACCAT  
CCAGCACCTGTTCCACTTTTTCCGGTGTGGCACTGCGCACGCATGAGAGCAGCTCCA  
GTAGGATGGTCTCGCCCTTCATTTTTGCGATCGCGTCGAGCTGTTTCGTCGGCGGTGA  
AATGCGGCAATGCGATGATCGCGGAAAACGTGTGCCGTAAGGGAAGGTCTGAATAAC  
GAGGCCTGAGAGTGCGGGATGTCGCGTCGGTCCGGAGAGTCGCGTTTGGATCTTCG  
GATCTTCCGCCATTTCTGGCACTTTCCTTGGGAATCCCCGGGTACAGGCGC

>CONTIG\_141\_length\_3517\_cov\_12.622714

CGATTCACAGCAAGCTGCCAGAGGGCATCTCTGATGAGGTTGCAATGCACGCCACC  
GTCGAAGCCAAGCGCGCGGGCATCCTTCGTGACGATCAGCTGCAGAGCGTGACCCT

ACACCAAGGAAGCATCTTTATTCTTGGCCAGACGCCGGGCTTCCGGGCCAAGGTGG  
ATCTGTCTGAGGCCGTGCCTCCACTGCAGGAAAGCGTCCGCCAGTCTCAGGCCTTGG  
ATGCGCAGCGGTTCGCAGCAGGATACGGTTGAGCAAGCACCTACACGATCGATGTAA  
AAGTCGAGCCGCGAAGTGGCTTCGGCTTGAATGAATTGTTGGGCCCCACGCAGCGA  
GCCTTGGAGAGCTTCACATAGCTCAGAGAACCTTGCGTAGTAAGAGTCGCATGCATC  
GCCAGTCGAAGATAAACTAGCCATGTAAGACGCCAGATCTGATTGGCCTATGGTGCT  
CAAGAACTCGGCCAAGTTGATGGCTGCCGTTGGCCGAAAATCCTCCAATGCCTCCAT  
GTCGCCAGCATTGCGAACTGCATAGTCCACCGCCCCAAAGATCGTAGACAGCGGTCT  
CCACCGCGCTAATACTCGTCGCTCCAAGCTGATGCTCTTTGTGGATGATTTTCATCCCC  
GAACTCGATGAGCCACGTTTCAAGATCGCTAGTGTCTTTCATGTGAGCCCTAACGCC  
TGAGTTAAGCCGTGCCACGAAGCGGCGTCGGCTTGAATGAATTGTTAGGCCTCATTG  
TGCGGCTTGCGGGGCAAAGCGACAACGTTGCTAGAAGACGAATGCTTAGTGCCCTTT  
ATTGATGCTGGACGGAGAAGACCAGGCGCTACATTCCAACGCTGACCGTCATCCGT  
AAGCAAGGAGACCGATTTTTTGTGTAGCGAACGATGACGCCATAAACGGGGCCAC  
GCATGTCCGGCTCAAACGTGACGCGATCACCAATGCTGAAGCGGAGCATAGTTGCG  
TGAGCTCGGGCATGCTGCATAAAGCGAAGTCTCTCAACAATCCGATGATTGAGGTGCG  
ATGAGCTCGGCTTCTGTCAGTTTGTGATGTCGATAGTCATGAGGTCTAACGCCTGA  
GTTAAGCCGAGCCGCGAAGCGACTTCGGCTTGAATGATTTGTTAGGCCTTGGGGCGA  
TGGGCCCAAGTATGATCTTTCCCAGTCGAACTTGAACAAGTCATTGATAGCGCAGT  
CCGGGTTGAGCCTGCTCAAAATGTGCCAAGCGTCTTCGCGGCTCGGTGCAGCGTCGA  
GCCAAGATGGCGGATAGCCCATTTCTTGGAGAGCATCTGTGAGCGTCTTGCCGGA  
TCTTGAATGCCTCTTCTGTGAAATACCATTGGGGATCGACGAAGGTACGAAACCGAA  
CATAGCAGTCATACACGATGCGCGTCACTGAAGTGAGATATGAGTTGCAGACATCT  
AGGGCGTCCACCAACTCGCTAGTACGAGGATGAACCAGCACATGCGTTGGCGCCAA  
ACCGTTCAACTGGCCGGCAAGATACTGGCGCAAGTGCGCATGACCAACTCGACCAA  
TGGGGTTCTCTCCTGTCTTCTGTGTGGAATTCCTGAACTCAACGAAGTGGGGGGCGA  
GCTGGTCAGTTCTAAGGGTTGCTTGAGCAGTGGCGTACCACTCCTCGAATCCTTCTA  
TGCCGGTGAGGGAGGCCTGGAGAACGAAGGTCACGCTACGCGAGGCCGAGACGAA  
TGCGCTAAATGAGAACTTTGCCTCCTGCGAATGGCGAGAGGTTTTTGAGAGCAGGTG  
GAGAAAATACTCTGCCTCGCGCAACTTCTCTTCTACCAAGCCAAACGAACGTGTCAT  
AAAAGGCCCAACGTTGGAGTTAAGCGGAGCGCGGAACGCGCGTCCGCCTTGAACGA  
GTTGTTATGCCTAGGCCACGAGAATTTCTCTTGCCTTATTGATGAAATAAGCACGAA  
GCTCATCATCATCTGGGATGAATTTGTTAGCGCGATGTTTCGACTTCGAGCATGGAGC  
GATATTCCTCTTTCGCCAAGAGGTCGCTCAGATATGCGTCTGCCTCGGACTCGCTTTC  
AATTCTGTATGACTCGATCATTTTTGATCCCTCTGCCTAACGCCTGAATTAAGTCGCG  
CCGCGAAGCGGCGTCGGCTTGAATGATGGGTTAGGCGCCAGACCGCGCATCTTCTTG  
GTAGGGCGCCACTAGACCGATATGCAACGTGTTCAATCGGCTCAATAGGTTGGTAAT  
TGA CTCAGTCCGGGCTGAAAGTTCGTCCGCCAGCGCGCTGAGTTCTTCGGAGCTGCA  
AGGCTGGCGCCTGTATAGGACAAGCAATGCTTGGTGAGCAACGTGATCTCTGTGCG  
GAACTTCGGCTTGCAGGTCCTTAACCAGAGCCGGGTCTACGCATGTCTTGGAGAAGA

CCTTCAGCAAAGTCCCCAGTGCTGCCTTGTCATAGTCGTGGCCGGAGAAGCCGAAGT  
AAAAGTCCTTACCAAGCCGATGCTTGGCAATTCGGAAATAGTTGTGAAGGTATGTTT  
TTAGCATCGCCTCGATCAATTGGTAGCCGCCAAGCGTCAAGCTGGCAATCTCCTGAA  
AGCTCTTCTTTTCAGATTGCGGATCCGTATCCATGGCGCCTAACGCCTGAATTAAGC  
CGACCCGCGAAGCGGGTTCGGCTTGAATGAATTGTTAGCCCTCACTGCGATGACCTG  
ACTAGCACGCGGTCACTGCAGACCCCAACAAACCGAGGTTGTGAGAGTGCCGAAAG  
CACAAGGTTTTACCAAGGAACTTGCGCTGTAGCAGCACCGCTCGGTGCCCCGCTTG  
AATGTATAGGTTTTCTTGCTCGGGGCGGACAGAGCAACTTTTGGGGCCAGCAGTCCA  
GATACCTTTCTCTATCGTCCCCGGGTCGTTTCGTGTAGCCGGGGTTGGCCGCTCGGCG  
ATACTCGAAGTTGTAGCCGTCAGCGAACTCGTAGCTTGCAGGTCCTCTCTTCTCGTG  
CCAGTTGCCCCACAGGGTTGAACTTATAAGTGATCGTTCTAATGTTGGTCGCCCCCTGG  
CGGGGCAGGCTTTGCGCTGTAATGTCTTACGCCATCTTTGGTGTAAGAGTGAACAGT  
ACCGGGCTCACGGTCTTGCGCGATGGTTGGCTCCAAGTGTATGGCAAACCAAATTGC  
AGCAAGCGCAGCATACTTCATGACGATCCTGTGGAAGTCTGTTGAGGGCTAACGCC  
AGAGTTAAGCCGACGCTGCGAAGCAGCGGTTCGGCTTGAATGAACTGTTAGGCCTCA  
TCCGAGTGAAGTGAGTCCCTGATACCAAGCCATTTTTCCCATGCTAGATCCGCGTCT  
ATGTCGTCGTAGCCGCGTGCTTCGACCATTGCCTCATAAGCTGATTTGGGAATAGCG  
ATGCAGGTCGTGTTATCACGTGCCTCAATCACCTCAGCCTTTGTGAGTGCGGAGCCCC  
TTTTCTGTTCCAGGCGAAGGAGAACAGCTACTAGTGCCGGGACTGGTGTGATGATT  
AGCTCTTCTTCGTCACTCATGCTGCTGCCCTTGAGGCCTAACGCCTGAATTAAGCC

>CONTIG\_142\_length\_3450\_cov\_11.644598

AAAGCATTATAAAAAGAGTTAAGTTTAACGTGGTTTAGTTAAGCTTGATGCGTGACG  
CTTTCGCTAATGCAAAAGCGCACAAATGAAACCAGGCCGCCAGCGGGCGCAACCAC  
CTATGAGGCCGAGCCGGCGATAGCTTTCGGCAAGGCAGTACGTACCGCACGTGTTG  
CGCGTCAGATATCGCAAGAAGAGCTTGCTACTCGCGCGGGTATTGAGCGTTCTCACA  
TGGGGAAGATTGAACGTGGGCAACACATGCCTACCTTGGCATTGATCTTGAGAGTCG  
CTACAGCCTTGAACGAAACCGCGGGCAATTTGATGGCTGCTACCGAAAACAATCTG  
CAAGTCGACCTAAAAAATTGAACTCCACGCCGTGCAGCCCTCCCTCAATCGATTTTC  
TCCTTGAGGCGTGCCGTAAACCTGTCCAAAGAAATTGAGGTCCCCGTACCCGTGCTT  
TTCAGCATGTAGGTTGTAATAAGCGCCGACTCGTCTGCTAAAGGACGTATTACCACA  
TCAGGATGTTTACAGGGCACCATCCTGGCGGCAGAGGCCAGACCGACTCCGTACCC  
AGCAGCAACGAGAGTGAGCATTACATCAAGTGACGCTGTCCGCTCAATAACGTTTCG  
GTTGCTCGTCCAAGGCCTGCAAGAGCCGGGTGAGTACTCTGTGGTAGCCCTCATAAG  
CTTGGCGGTCGCACATGATCAAAGAGACCCGAAAGAGTTCTTCAACGGGAACCTCC  
CTGTAAGCCAGTAACGGATGGCGAGCCGGTATGACGACAACCATCTTGCTTGCCAG  
ATCGGTTCTACAGCGATTCCCTCCCCAACCTCATCGGTGTGCGTAAAACCGACGGTG  
AAGTCTCCAGACCTCAATCCGCGCAGGAGCTCGGGAAGTGCGACTTCGGTTAGGCG  
AGCCTCAACTTCAGGTTCTCTCCTCGCGGCACATTGCGAGAAAATCAGATAGGCGAG  
GGTCGATTGCGCCATAGGACACGGCGATACGCAAACCTGCTTTTATAGCCTGAAGATA

CCGCTTTAACGTTGTCGCGAGCCTGTTCCAAGGTCGTAAACAAGCGCCGTACATCCG  
GCAGAAACACTTTTCCGGCTTCGGTCAGCTGTGTGCCTCTTCGGTCTCGATTAAACA  
GCAGGGTGCCCAATTCCTCCTCGAGCTCCTTGATGGTTCGGGATAAAGGGGACTGCT  
CAATGTGCAGACGTTTCAGCTGCCCTCGTAAAGTGGAGCTCCTCAGCCAAAACAGTG  
AAGCATCGCAGATGTCGCAACTCCATGCGCCAGACTCCTTAAACGGTCGCAATCGTC  
TGTGCCAACAGCGGAGGGACAAAATAATTCAGTTGCTGGCTCGTATCATCGCTTAGG  
TTGGCAACGAATTTCTGACACAACTCATAGTTTGACGATGCGGAAATTTCTAATTA  
AGCAAAAGAAGGATATCTGCTATAGATATCGCTCGACATGCTGGCACTACGCAATC  
AAGTCGATTAAAGTTAAGCTGCCTTTTATCAGCTGATGCTAACTGCGCGCCTTTATC  
GAGCAGGAAACGGCTTGACCAACATAGAGGTCATAGTTCAACCTGCCCATAGCACA  
TCCGTACTATTGAGCGCAGCCGATCAAACAGCTACGCTTTCGAAGATCGCACCCAGG  
AAAAAATTACTACGCACAACAAAATTAGTTCCATTACAACCACTACAAGCGGGTAA  
TTCGTATTCAATTAGAAATGCAAAGGATATGGCTTTTATCAGAAGCTACTACTAGTT  
TAGGAATTTGCATTGCGCCTCGCTTTCATCAACTATTGGGAGTTGAAGCTGACGATT  
TCTGATAGGCGTCAATGCTCGCCAGGCATTTCGAAATCCTGACGGTAAGACTGATTTT  
CTTTACTTTAGGTTCAAGGGCTGATCGCACAGCCTGCCAAGTCTCGCGCTTCATTTGA  
ATCCCACTATTGATACTCCAACCGCCTTTTGGTGTTGACGGTCGACCAACAAATAGT  
GGACGAAGGTATTGGAGAAGAAAGCCTGACACCCACGGGAAGTCCCGGACGCCGC  
CGTGAAGATAAAAATTGCTCCATCGATAGATTTTCCACACGTCATGCACATCTACTG  
CGAATTCGATTTCACTCTGCCGTGTTTGAATGGCCTCAAAGAGCTTGCTAAGGTCGA  
TAGGGATCATTTCTTCTGGCTTGCTCGGGTCCACAAGGCTATTGACGCAAAAGGCAT  
GTCGCAAGCGTAGCTCTATTGCCGTGCGAAGAAGTCTACAGGCGTGATAGGGAGCC  
CTATCGGCATGAGTCATGCCTGAGTAAACGCCGTAGATAATCTGCTCAGTGCCTTTA  
AAGACTTCAAATGGCGTTTTCGCGTCGACGTCGCCATGCAGCAAAGAAGCCGTGCAC  
GCCAGCAACCTCTCGGGCAGCATCTTCTAACAGAACTACTGCTAGCTCCATCATGTC  
CATTAGCGCTCGATGCAAAGTATGTATCGATGCATTCGCGGCAAAGGGCACCTCTGT  
TTTTGAAAACCTGATCAAAATTAGCGATACTTGAGCAATATCGCTTAGCCTCTGCGTC  
CAACATGGTGAGCTGGGCTTGATAAAACGGGGCATCTGACATCTTCTTGCGGTCCGC  
CACCGAAACGATCAAGCCCTGACGCACTGCCTCAGCATCTTTCATTGGTTTAAAGTTT  
CAGCGGCACGGACGGTGCCCTGAGCCTTCGGGTGCTTAGCTTTGGGGGTCAAAATGAT  
GCCTCCTAGCTCGTCCCAAAGCCATGGAAGTGCTTCATTCTGTACCCAAGTCCCAA  
GGCAATCATGTTTACTGCGTTTACTTCTTTAAGCTGCGCAAGCTTTTCCGAATAGTCC  
TTGCTGTTTCATGAATCTTCCTTTGTACTTTTGTCTGAGCATTTATTTCCAAATCATAT  
TGCTTGACATAACGGATCGCCAGTTCAATCAGCGCGATCACCTGATCGGGGCGTTCC  
CGTCGACCGGTCGCGTAGAAGGCGATCAGATAAAAGCAACAGGCTAGGATCAAGGG  
CGCCACAGCATGAAATTACTGTCTTGCTTGCTAGCACAGTGACAGAGATGGCAGC  
GGCTGCAAAAGCTGGGAAGATACCGACTTTCCGAATATCGCCGGCCAAGAGCGAAA  
CTCTCCCGTCCACAATACCCAGCGATGTTTATATTGAAGCAGTCCATACTCAATGG  
TTAGCTTGTCGAATTCACCTAACCTTCTAAAACTGGGCGTCAGTCAAAAGATCGT  
TTTCTAAGCGTTTCAGTATCAGTGCAAATCTTTTTTTTCGGTGTTGCCGAACGAATTG

GTAAAGCCCAATACTGATAGTAGTAAAGTAAAGGAGTGAGATAATGATCAGAACCC  
CATTCGTAACATGCAATACACCGATCATCTTAACGACCGGCGCACCCGGCCCGTAAC  
GATACCAACCTGCAAAACATAGAAACACGAGAATTGTGATCAGC

>CONTIG\_143\_length\_3433\_cov\_236.599516

TCTCATCATTGAGGATGCCCAGCGCCGTATATAACGACACCGTCTTGCCCGAACCGG  
TCGGCCCGGTACCAATACCATGCCGTAGGGCTTGTGGATCGCATCCAAAAACAGCT  
TCTGCTGATCCGCCTCGTAGCCAGCTTTTCGATCCCCAGCTTGGCCGCACTGGCGTC  
CAGGATACGCAGCACCACTTCTCGCCGAACAAGGTCGGCAAGGTGCTCACACGGA  
AGTCGATCTGCTTGGTCTTGGACAGGTTGAGCTTGATGCGCCCGTCCTGCGGCACCC  
GCTTCTCGGCGATATCCAGCTGCGACATCACCTTCAAGCGCGCCGCGATGCGCTGGC  
TCAGCTTCACCGGCGCCTTGGCCACATTCTTCAACAACCCATCGATGCGCAAGCGCA  
CTCGGTAAATCGTCTTCATACGGCTCGAAATGGATGTCGGAGGCTCCCCGCCGGATCG  
CATCCACCAGCACCTTGTTGACGAACTTCACCACCGGCGTGTCTGTCGCCCTTGGCAT  
CGACCCCGGAATCCCCCGGCGCCCATGTCTCGTCCCCGGCCGACACGTCCAGGT  
CACCCATTTCTTCGTCATCGTCACCCATTGACGAGCCAAACGAAGCGCTATTGGCCT  
GCCATTGCTCCAATGTGCGACGAATCTGATCTTCATCGACCAAATCGGCTCGACAA  
CCAGATTGGTGTGGAACCTTGATGTCGTCCAGCGCACGCGTCTGGGTGCGGTTGCTCA  
CCCCACGAACAACCGATTGCCGCGCTTGAACAGCGGCAGCACCTGGTATTTCTGAA  
GCAACTCCTCACTGACCAGCTTGATCGCATTTTGGCTAGCATCGAAAGACGACACAT  
CCAACAACGGCATGCCAAATTCAACGGCATTGTGCTGCGGCAAGCTGCGCACTGCTA  
ACCAACTTCTTCTCAGCAAACCATTGAGGCAACGGGATTTTGGCAAGAGTTGCCTGC  
TCCATGGCCGACCGAGCAACCGTCTCTTCTAAAGCCCCATCCTGAACCAAGCGACGA  
GCAATACCGGTTATGCCAACAAGGTTGACTGAGCTGAAAGCATTTCATCACTCACACC  
TCTCTAAATTCACTCACAACAGTATTAATGTTTTTTCGAATCATTGCTAATCAGAAAA  
TCCCCGGAAGAACCTCAAATATCGATGCTTCGAATAATCACTAACGAATCAAGTACC  
GGCAGAAAATAGATGGAATTTAGCTCAAATAGCAATAAAAAAATCATTACAACCCA  
TACAAGCAAGGGGAGAGCCGCAAGACTCTCCCTTATCTCAACTAGGCAACAATGT  
CACAGAGCCGAATTGTTAGGTACCGCGACAGGTAGCAGGACGATACTTCACATCGA  
TGGTACCAGCACACACCCAGGAGACCTGACCGTTGGCTGCCTTAGTACCAGTAAGT  
GTGATTGTTCCAGTAGGAGTACTGCCACCCAAATCCTTGGCGGTTGCAGTGATGACA  
CCCGTCGTTGTACCACCCACATAGGCGACACTCGCCACATACTTGGATGCCTGTGTC  
TCGACAGTAAAGGTGGCGGGCATATTAGTAGCACTGGTATCGGCAGCAGCAGCTTC  
CGAAACTGCCGTACGTGCCGAAGACGCGGCCAGCATCACTTCCGAAACGCGCGCCT  
TGACCAGGTAATCCTGATAAGCCGGCAGTGCGATGGCAGCCAGAATTGCGATGATC  
GCAACCACAATCATCAATTTCGATCAGGGTAAAACCTTGTTGCTTCTTCATGAGTACA  
TCCCCTTAGAGGTTTATGGAATTGCCGAAATCTCCGGCCTGGGCACTCCGCGCGTCC  
AGGCAGGGCGTGTGTGCGAATTGATACATGCAGGTTGTATGCCAACCATCAATGAC  
CAGCTCGTTTTCGTTCCCCGGAACAGATGATGCCAGGCATTTTCAGCAGATGGAAGCAC  
ACTTTTTTGCAACTGCGACGGAGCAGACCATGTGACGCGGCAGGTCACATTTGACC

ACTAAGCGCGCGCCCATAGGTCAATGAGCGTCCAGCAAATCACAGGATGTCCTCAT  
CAGCCAAACACGCTACCATCAACGCAAATTTTCGGCCTGGGGATGGCCGAAGGGGAG  
CCCAACATGTCAGTCGCGCGTAGCGCCATCAAGAAGCAACCGGTGACCGGAACAC  
TAGCATGCTGCAGACCTTCGTTTGGGAAGGAGCTGACAAGCGTGGCGTGAAGATGA  
AGGGAGAGCAGACAGCCCGCAACGCCAATATGTTGCGAGCAGAGCTGCGCCGTCAG  
GGCATCGTGCCCAGCATGGTGAAGCAAAAGCCAAAGCCCCTGTTTCGGAGCGGCGGG  
CAAGAAAATTACCGCCAAAGACATTGCGTTCTTCAGCCGTCAGATGGCGACGATGA  
TGAAGTCAGGCGTGCCCATCGTCAGTTCTCTGGAGATCATCGGCGAGGGACACAAG  
AACCCACGCATGAAGAAGATGGTCGGCCAGGTCAGGACTGACATTGAGGGCGGATC  
CTCGCTCTACGAGTCCATCAGCAAACATCCCGTCCAGTTTGACGAGCTCTACCGCAA  
TCTTGTCGCGCGGGCGAAGGTGCCGGCGTATTGGAGACAGTCCTAGATACGGTCGC  
CACGTACAAAGAGAACATTGAAGCCCTCAAGGGCAAGATCAAAAAGGCAATGTTCT  
ACCCTGCCATGGTGGTTGCCGTGGCAATCGTTGTAAGTGCGATTTTGCTTATCTTCGT  
GGTACCTCAGTTCGAAGAGGTATTCAAGAATTTTCGGCGCTGAACTACCGGCATTAC  
TCAGCTTCTCGTCAATGCCTCGCGCTTTATGGTCAGCTATTGGTGGTTGATGCTGATG  
ATGACAGTTGGATCTATCGTTGGCTTCATCTTTGCCTACAAACGTTCTCCACGGATGC  
AGCATGCACTTGATCGGTTGATCCTCAAGGTCCCCGTGATTGGGCAGATCATGCACA  
ACAGCGCAATTGCACGTTTTGCACGCACTACTGCCGTAACGTTCAAGGCGGGCGTAC  
CTCTCGTCGAGGCACTTGGGATCGTTGCAGGTGCCACCGGCAACAAGGTCTACGAA  
GAGGCCGTA CTGCGGATGCGCGACGACGTATCGGTTCGGCTATCCGGTGAACATGGC  
GATGAAACAAGTGAATCTGTTTCCGCACATGGTGGTGCAGATGACCGCAATTGGCG  
AAGAAGCAGGCGCTTTGGACACGATGCTGTTCAAGGTAGCTGACTACTTCGAGGAG  
GAAGTCAACAACGCCGTGGACGCGCTCAGCAGCCTGCTTGAACCACTGATCATGGT  
GTTCAATTGGTACCATCGTCGGCGGCATGGTCATCGGCATGTATCTTCCGATCTTCAA  
ACTCGGCGCAGTGGTTGGATAAGACGTAATGGCATTCTCGACCAGCATCCCGGTCT  
CGGCTTTCCCGCCGCGGCCGGACTGGGACTGC

>CONTIG\_144\_length\_3429\_cov\_10.322532

GTGCACGGGCCTGCTCAATGCTCAGTTAAATGTAGATAAATCCGAGCATTTTCATGCT  
TGATTTGGCATCTTGATATATCGAGATAGCATCCAGCAGTGATGTGCTGTTTGAAGC  
TTCTCTGTGTCGCTCCCGATCGGAGGCCATCTGACCGGAGGCCTGCGGCCATGCGGC  
CCAGCTCTTCTCCTGATTAGCCCTAACGCACAAGTGAGTTCACCCCGGCTCTGCCGG  
GGTTGGCTGTAGCTGTTTGAATTTAGGGGATCCCATTAAGCTGGCCGCCTTATTGG  
CCGGGGACGTCCAGACGTGAATCGTCATGTAGGTACGGGCGCAGCCCGGCGCGGGG  
GGGGGCAACGACCGACAGCCTGACGCCATAATGTTTCCAAATGTGCTGCCATGACC  
CTGATGCATGCAACTCAATGGTTCGTGTTTCGTAGACGCATGCCGAAGAAGAAAAGCA  
ATGGCAACGACTGGAGGAGATACATGTCGATACTGCAGGAAATACTGGGCTGGACC  
CAGGGGCTGGCCACATGGCAAAGCGACGCGGTTCGCACGTTTGTTGGCCAAGCAGAC  
GCTGACAGTTGAGGATCAGGACGATTTGTTTCGCGCTGCTCAAGACGGCATAACGGCAT  
CCCTGACCCCCAGAACCGCAAGCCCAAACCACTCACGGCCGATCAGATCCCCGTGC

CCGTCAAGGCGACGACGCACGTTGAACTGCGCGCCATGAAGAACATGCGCCACGTC  
AACGCGATCGCGGAGCACCAGCATCTGCCATTCGGCGCGGCGGGAATGACAGTCAT  
CTACGGTGACAATGGCTCGGGGAAATCCGGGTACTCGCGCGTGCTCAAGCGGGCCT  
GCCGTGCACGCGACCAGGGAGAATCCATACATCCAAATGCCAATCTGCCGGTCGGC  
AAGGCTGGCGCTCCGGAGGCTGCCTTCGAGATTGCCGTAGACGGCGTTGCTAAGGA  
TGCGCACTGGATCCATGGAAAGGCTGCGCCTCCCGAGTTGTCGTCATTGCGCCATCTT  
CGATTCGCGCTGCGCGCGTGCTTACCTAGACAACGAAGACGACTTTTCCTACGTACC  
CTATGGGCTGGACGTGTTCTGAAGGACTGGCGAAGATCTGCAAGCAGTTGAAGACTT  
CGATCGAAACCGAGCTTGCGCAGTTGCGGGCCGACCTCACGGCATTGCTGCCGTTGC  
AGGGCGACACGCTCGTCGGCAAGTTGATCGCATCGCTGTCTGCCAAGACGACTACT  
GCTCAGGTCGATGCGCTTGCTACGCTCACACCTGAAGAACTGACCCAGCACGTCGCA  
TTCGACAAGAGCCTGAAAGAGAACAAACCCGAAGGAGAAAGCAATCCAGTTGCGCCT  
GCGCGCTCGTCGCGTGTCGGCCATCGCGACGAATGCCACGAACAAGGGGGCGCTGG  
TGGATTCAGTGGTCGCCGCCAAGCTGCGCGACCTGGCGGACAGTTACCGCACGGCG  
CAGGCGGCAGCCGCGCTCGCGGCGAAGCAGTTTAAGGAAGGCGGAGAACCTGCTGCC  
AGGCACCGGCGGCGAGGTCTGGCGTGAACCTCTTCGATGCTGCCCCGCAAGTTGCGGG  
TCGAGTCTCACCCGGATAATGCGTTCCCCGATCTGGGCGCTGAAGCACCCCTGCCCCAC  
TGTGTCAGCAACCTCTCGGCGAAGGCGCGGCTCGCATGCTGCGCTTCGAGTCCTTCA  
TCCAGCAGGAGGCCGAGAAAACATCCCAGGCGCGCCGTACAGCGCTGTACGCCGAA  
TACAAGCCGTTTCATCGCGCATGTCATGACGTTGAGTCTTGACGATGTGACCCATAGC  
GAAATCGAAGTCCTGGATCCACAGCTTGCCGCTGACGCCAAAGCATTTCGAGACATT  
GTTGACTGCTCGCCAGGAAGCCATCAAGGCAGCGGTGCTGTGCGACAAGTGGGACG  
GCATCGATCAGCCCTTGGTCACCCCGGCTGCGCGGCTCCAGGCGCTGGCCGACAAG  
CTGCACACCGAGGCCGAGACGTTGGAGAAAGCGTCGGATGAGAAGGCGCGCGCGG  
CACTTCAAAAGCAGTTTGGCGAACTCGATGCGCGTGTACGGCTGAGCCAGGTCAAG  
GACGCCGTGGTCACAGCGGTGCAAAAACCTCAACCATCAGGCGAAACTCGCGAAGTG  
TCTTTCGGCCGTCAAGACCAACGCCATCTCGCTGAAGGCCTCGGAGTTGGCGGAAA  
AGGTGGTTTCCAAGGAACTGGCCGAAGCATTGAACCGCGAATTCAAGGCGTTGGGT  
GTCGGTACGCTGCGTGTTTCGCTTCAGAGTCGTGCCGACAGAGGCAAGGCCCTGCAC  
AAGCTCAAACCTCGAACTACCGCAGAGCCGAAGCCCCGGCGACATCTTGAGCGAGGG  
CGAGCAACGCGCTGTGGCAATCGCTGCCTTCCTGGCCGAAGTCGGACTGAGCGGCA  
GCAAGGGCGGCATCGTGTTTCGACGATCCGGTGCTTCACTCGATCATCGTCGGCGGG  
AACGCGTGGCAAAGCGCTTGGCCGTGCAAGCTGCGCAGCGCCAAGTGATCGTTTTTC  
ACGCACGACATCTATTTCTTTGTCTTCTCGCAGAGGAGGCAAAGCTGGCCGGTACG  
CCGATTGCCACGCAGAGCTTGACTCGACGTGCTGAGGGATTGCGGGTTGCCGATCCG  
GAGCTGCCGTTTGAAGGAAAGAATGTCAGCAAGCGGATCGGCGTTTTGAAGGTTCA  
GCACCAGGCCATCGTCAAACCTACACAAGGACGGCGAAGAGCAAGAACACCGGAGG  
CAGACCGTCGATGCATATTTTCGGTTGCGCATGGCGTGGGAGCGCGCCGTCGAGGA  
GGTGCTGCTGCGCGGAGTCATCTGCGTTTCCGCAAAGGCGTGGAACGCAGCGAC  
TGGCAGGTGTCGTCGTCGAAGACGGTGATTACGCGCAAGTGAACGCAGGCATGACG

AAGTGCTCGAACTACGCGCATGACAAGGCACTTCTGGGGGGTGTTGCCATCCCTGAC  
CCCGACGAACTGCTCGTCGACATCATGGCGCTGGAAACGTGGCGCGTGCAGATTGA  
TAAACGCAGCGTTGAGATATCCAAGAATCGCAAGGTTGCTCCGGTCGTTGCGCCGCC  
TGCGTATGCCGTTTAGATTTTCTGCGCCACAAGCGGCCACGCTGCCGGCGCAGGACG  
GGCTCAAGACCTTGCAGGCCAGCCTGAAGGCGACGCAGCGCGGCCGGTCAGCTCAA  
GGGCGGCGACGGCCAGGCCCGTGCTGGAGCCGCCCGGCGCTGCTGGTTCGTGCAA  
ACGGCGTTACTGTAGTGGCCTGTGGCAGGGGACTGTGCTCTGCGTCCGTTGCGACGA  
CGCGGATGGCAGTCCTTGAACCTTGATGGAAGTCCTTGGACGAATTTTGTTGCATAG  
GGCGAAAAACAAGGCTAGAATTCAGGCCTTCGCTAAGCACCGAGGCGAA

>CONTIG\_145\_length\_3427\_cov\_16.011818

GAAGATCTCCCGGCGAGTCTGCTTGCCTTGCCCAGGCCCTCAGCGTCACCGAACGT  
CAGTTGCATGGATCACTCCTCAACATGGGGGTAGTGTGCTTATCTGCGGTGCGTTG  
TTCAGAGGTTCTTAAGGAATTCGTCCCGATCTTCTTGCCCGTCTTTATGCGACGCGGT  
GCTAGATACTGGCCGAAAGGAAGCGTTGGGCAAGGTCTTTTGTGAGGGCCGCAC  
TATGCCGTAAAAGCATCAATACGCCCTGAAGCCGCGCATGCCCGCTACGGCCGAGC  
ACTTCGCTCGCGAGTGCACGATGCGTATGTATCGCGTCATCAGGTACGAAGCGTGCG  
ACACCGGCCCCGAGCGCCGCGGAAGTAATGGTCCTCTTGGGCCATTCCCCGGCTCATA  
GCAATTTTTTCTGGGTCAATCTGTGATAGTTTTGTGCCGTCGCGATAACGTTCTCTG  
GTTCAACGGTATCGGGATTGCAGGGATCAACAGCGCTGTAATTTCTTTATAGACC  
AGCCTTCAAAGCGTTCTTGGCCGCTTGTGATTTCACTGCGGATACGAGCCCCCTCTT  
GGCGTCGCCTACATCCCCGGTGCCGTAAAGGATGCCAACGCGTGTCCACGCCCCCAC  
GCTGGACGAGTGTTCCGCCGGCATCGCTTCCAATCCCTTCAGGATTGCTGATCGAGT  
CTCCTGCCAATCGGGCGCGGTTGTAGTGAAGAACCTGCCCGAACTCTGCATAGGGCAC  
CGACGTTGATGAATTGAGTTCGGCAGAAAACCGCCAACGGATAAGATAGGTTGCGA  
TCTCTTCTAGCGGCATACCAGCCAGAAGATAGAGCGCGAAGCGACTTATACCGTCG  
AACCTAGGGTGCGGAGCGATTACGAGGTTCTTAGTCATGAAGGATCGCTCGATTTC  
GTGAGGGCAGCCTGACGTTCTTGAATGTTAGCCAAGACTCTATTGCGCTCTTCGTCA  
GCCTGAGTGACAGATCCATGGCCCCGACGTCCGGTGCATCCCTCGTTCTGGTGCAAGC  
GAATAGAAGGACAGCCAACGCTTCGTAGACTCCAAAATGTGCTGCCAACTCCCGG  
CTCGTCGCGCCGGTTGAGTAGCGCGTAAAGCAGCCACTCTTTGCTGGCGATGTGCTC  
TGAGACAGGTATACATTTTCAGCGGCTTGCAAGAAAGCTACCGGGGACGATTTTGC  
TAGCACGGCGAAGGCGTCGGCCTGGCTGTTGGAAGATTCTGCAGTGATACGAATTT  
TTCGATCAGCGCGGAACGTATCTCGGGGCTCGTTTCATCTTCAAGGCAAGCAATCTG  
CGTTGCGAGCAAGATAACCTCGGCCGTTTCATCAAGTGCGCTGATCGGTTCCAGTAT  
TGTCGCTAGCTTTTCTCGCGGGTCGCGTTTCGTTGCGCAACTCGCGTTCAAGTTGGCCG  
ACAAGGTAGAGCGCGAGTGCCAGGTTGAGACCATCGAGTTTTATCTCATACTGTGAA  
GCGCTTCCTTTCACCGAGGAGAAGAACCGGCTCGATGCAACAGCTTCGAGTTGTGCT  
TCTTGGACGGCATCGAACAGCCTAATATCATCCGTATTCTGCGCATTCGCTCGAGCC  
AATACCTTAGCCGCGAGGTCTTTCAAAAGGTCGGCGAATGCGGGCGCCGAACTGT

AGCCGCCCCGTGCTGCTCCATTCTGCGCATATGCTCAAAGAGCAGCCGCCCCGACGCT  
TAGCTCATCCAAAAGCTCGATGGCCTTTGCTTCAATCAGCTCAATAGCGATGCCAAG  
AAGTCGGGGATTCCGAACGGATTTCGAGAACCTCAATCCTGGTGTGGAGAAGTCGA  
TGCCGCGACTGCCCAATATCTGTTTCACGTCATTGATGGACCACTCGGCCAGCGTGA  
TCGTCTTTACTGCACAAAATAGCGTTTTTTTTGAGATACGCCCAGTGCTGCGTACGGG  
TGGTTACCACCAGGCAGCCGCCGAGTTCCTTCAAGCGTATCGCGGCGCGATCGAGCC  
AACGCCCCCAGTTCGATTTGAGCGGTTGGTTGAGCCCATCCGCTATGAGGGTTACGC  
GGACGGAGCTTGCCGGAATGTTTCGTGCGCCAATCTTTGAAGCGGCGCCGCCAGCGC  
GCGACCACTTGCGGTGTAACATTTCCATCTGTCTGATAGATCAGTTTGCGAATTAGG  
AAGTCATCGAAGTCTTCTGCATCATCTCCGGTCAAATCGTCGGCAGGACACAGGATG  
AGAAGTGATTTGGGATTGGACAGATTCCAGCTCTGGACAGCCAGCCAGGATTTTCCG  
ACTCCCTCTTACCAGACAATTGCGTAGATTTTCGCTTTCTGGAGCTCCGGAGAATGCCT  
TTGTAAGAAGCGCACGCTCAGGTCGGTCGAGTGGCGAAGGGCCGGACGGATCAAAT  
GGGGAGAGCGGTTGGCCGAGCTCGGCGCGCGCCTGCACTTTGTCTGTGAACAACCG  
GCCAGCCATTCTTGTTGAGCGTCTTGGCATGGCCCAATCCAACGTCTGTGACGAG  
TGATTTTCTGAGTGCAATCAGCCTTGAGGGATAATCCCCGTGTTTTTCAAAGTGGTC  
GATTGCTTTGATAGCGGGTGCGATAAGGCCCGATCCAAGCTTTCCGGTGAGTCCTTG  
TTCGATAATTGCTTTGGATTTTGAACCTGCCGCAACAGTGGCGACGAGCAGCGCCCC  
GAGATCGTTATTTGACCAGTCCAATAGCGCGAAGCCGAAGCCGTTCTTGGCCGAAA  
ATTTCCGCCCCGTCTTCGACTGTTTGGGATGCCACCTCGCATGTTGCTCCGAGTATCCA  
GAGATCCACCACGCCGGTGTTCATCATTCGCAACGTGAAAAGCTTTGTGCGAAATATC  
GTTCTTCGAAAGGCCTTCTTTGTAGCGTTTGGCCCTCGAAATATGTGGCCCCGCCATCG  
AACGCCGAATCGCCGTCTCGACCTCGCTGTGTACCTGACTTTGCGAGACGGAAAGAT  
TGTCTGTGATTTACCCAGTACGACTCCGAGTAACCCTTCAAATCCTTCTGGGCCTG  
AAGGGTCGAGGGGCTAAAAGGGCTTCCTGTAGAGCCTTCGCGTGCGTTTTATCTACTG  
TGTTTCATGCTGGAGTGACGGTTCCACAAGTGTTGCAGCCGATGGGAGTTAGCGGGGC  
GTAGCTTTGTGAGGTGAACGCCTTGCTTCACCTCTTGGCCAGGTTTCGGAAGAATAAA  
GGTGTGCGGTTGCAGAACGACAACCTTCCGGACCTCCCGCTTTTAAAGCAGCGAAT  
GCCTCCTACTGGCCGATTTCTGCCGCTCAGGGTCGGCCCCGCGGCCTGGTCAAACCG  
ATGCAAACGACTGGTCAAGTCGAATGCAAAAGGCTGGTCAAGTCCATGCAATTACT  
CACAGTAAAGCGAAAAGTCCATCCCGCTATGCTGCGGTGAAAGCCCATTACTCGTG  
GGCCCGAATATC

>CONTIG\_146\_length\_3360\_cov\_139.920507

CACCAAGTGCATCGGCCAGATCCAAGGCAGTCTTGAGATCTGGGACATGCGTGCCC  
GTTTCGTAGCGGCTGATGCGAGCCTGAGCGATGCGACTCTCCAATCCAAGAGCGAC  
ACCCAAGTCCTGTTGCACAAGGCCAATTGCTAGGCGGCGCGCTTTAAGCCGCGCAG  
CGAACAACGACAGGATGTCAGGTTGGGGGATGCTCATCCCTACAAGGATGAACGTG  
AGTTACGCGCCTTGCAAAAATTCGTTGAACGAATCATTCGTTGAACGCATACTGACG  
TTGCCCCGGCACGCTGTCAACTGCAACGGGGCCGACGCCTGAGGCGGCCATGCCGG

CCTTAAACGGCTATGCATCTGTGCCAATCCGTTTGCTCTCGCTTATCCAAGGATTCCCT  
ATGTCCAAAGCTCGCTTTGCCATCATCGGCACGTTGATCGTCTCTCTAGTGGCTTGCT  
CTGGCGGCGGCCCCGCTGAGACTGAGCGGGAGCATGCTTTTTTGCAGTTCGTCAAAG  
CGAACAGCAACGAAGAGGGCGCGCATCGAAGACTTCGAGAGTAACCAGTGCACGAA  
GGCGGAAGGTGCGCCCAGCTACACCTGTGACGTAAGTGCCAAGGTTGAAGCCATGG  
AGCGGGACTTTGGTCATCAAATGGATGGGGTCTACACCTTCACCAAGGTGGGCGGC  
ACTTGGAAGATCACCGGCCGCGTCCAATAGCCATCCGTCTGCAATCAACGATGGTCC  
CATTCTGTTCTCAGGAGTTCACATGACCGTTAGCACGTTTCTCATCTTGCTTGTCTTG  
GGCACGGCGGTGCTGGTCGCATTTGCCGTCAATCGGGCTGACCGATTGCGCAACCA  
GCGGGAGGTCTTTGGTCGGGAGTTTGATCGCTCGTATTTTGGGCGACAAGGAGCTTT  
GGCGATCTCGATTGAGCGGTGCGGGTTGAAGATTTCGTGTCGGCAGGACAGTGAAGA  
TCTACCCGTTGATGGATGTTGCTCCTGGGAGAAGCACTGGCACAACCTCAAGGCGGG  
AAGGAACGATCACGGTCAGCGTTCGAGATGTGGATCATCCAGTCTGGACGATCAAG  
TTCGGCAGCGAGCGCGAGATGAACCAGTGGTATGAGATCTTGAATCAGGCGATCAA  
TGAGGGGCGAGAAGCTCTGACCGCTCGTTTTTGCGAGGGGCGGCTTGACGAAGATCCG  
CTTTGTGCTACGAATCGAGTGCATCAGCCACTTGGATTCTTCGCCATGCCTCCTTCCG  
TCAGTCAGCAAGCCTTATCTTTGGACCACCAAGAACATCAACTCCGCCAAGCCCATG  
TTGAAGGCTGGATCGCCCAACAGCATGCGGCTGGCTTTGGCGTTGACCAGCACATGG  
CCGACGCCCTCAATGCGTATCTTGATGGCCGCTTCGATCTGCCTGGATTGCTGACAG  
AGCTTCGTCTTCCCTACTTGAACTGAGTCTGCCAACGGATGCCGGCATGATAGGTAT  
TTTCGCCAGCGAAGTCTCATCAGCTGAAGTGTCCATGCCTGGTCCTGGGCGCTCTCG  
CTGGGCCTGTTCCGCCGTGTGGCCATCCGGCACGCTCAACAGTCGCCCCCTCTTGGCG  
GTAGCGGGACAGAAGCTGCTCGAAGCTTGCTTGTCTTGGACAAAGATCCCGCTGCC  
TCGCATCGCCTCTAAGCGTTCCGTCAAGGGCCGATGCTCAACCGTCTTACCGATGCC  
GGCCTGTTCAAGGTGTGCATTGATCCGATCAGCGATCATGGCGCGGATCCACTGGAT  
CTCAGCCAGGCCATTGATGCGCCCATCGAGCACCCGCGTCTTCTGGGTCAAGCCAGA  
GGCTTGATGCGCCTGGTTGTCGCAAGCAGATGGGCGTAGAAGTAGCGAGGATCAT  
CTTTGGTCGGGCGATGGTGACTCGTTGCAGGGCAAAGCCATATCGCTCAATCAGGC  
GATGTGCGATATCCAGGGTCAGGTCCCAGCGCTTTGGGTCAATCAAGTTCGTGCGGTA  
GCGCGATGGTGAAGTTTCGGCACACGGTGCTGTTGCAGCGTCGCTCTGCGGCTTCTG  
CAGCGGCCCAAAGTGCTTGCGGGTCATCGGCCCATGCTGGCGAACCAGGTGGCGCC  
AGGCAACGCGATTGGATGATGCCTGCCCTACCCCGGTAGTCGTGGCGAGCGTCCGA  
CTTGGGATCGGTGAGCAAGTAGCCGCCGCGATAGGCCGCAGCTGCGATTGCAGAGT  
GCCCCTTTGCTCGGCTGTAAGTTTTTGATGCGGGTGTGATGGATGGCCATGTGCATTT  
CTGAGTCAATGTTATTGGTTGTGACTCAAGATTTTCGCGAAGCGAAAGGGCTAAAAAC  
GCTTATTTTTTAGGGGTTTTTCTGCCTATTATGGAATTACCGCGAACTCCGGTCGACT  
TCGAAAAGCTGCCCCAGGCTCACGAAAGGTTGCGACGGGTGATAAAGCTCAGCACT  
CCACTTTGCAAACCGCTTCACTGCTCCATGAGGTGCCTCGCCAATGAACTGCCCCTT  
TATGCCGAAGGCAAACCTTGTCGGCATCGCCCCACCGGTCCGGAATGCCACCGACCA  
GCACGACACCTGAGGGTGTCAACGACAACGAGGCCGTTTCCAAGGTTTGGTGTCCC

GGCACAGCTCCATGGGGCACGGCCGCGAACCAAGCAAATGGCTCAGCCAGCGTCAG  
GCAAGGCGGCATACCTTGGACCACCTTGAAGACCGTCCCGACACGATCTCCTTGCAG  
CATCACGAAACATGGGGTGGGATCACCAGGATCCGCTTGGTTATCGACGAGCAGAG  
CCCAAGCTTCCCGAAACAAAAAATGCTCCCAGGTGAAAGATCCTGCGGGATCCTC  
TCTGCAAATGCTTCTGCGGGAAAAGTCATCGTGACCTCGACTTTGAACTGATGGGA  
TCAGCTATTCCAACGACGACGCAGGAGCACAACCAAGTCTTCGACCATGCGCTGCG  
CATCCATGGATAGCGATTGCCTAACTCGATGGGCCGGTGAAAGGAGCACGGGGGCT  
TGGTGCTCACCTTGCCGGTAAGGCACCTGCATGTTGTTGGGACTGGCCTCGTGCTCG  
GCGCGGGTCATCCAAGCACCAGCATGCTCTCCCAACAATCGCACCCGAGGAACGAC  
ATGGCTAAGCCGTTTCGGTTGGATCAATATGAGCCAGGAGCCAAGAGGCGTAGCTGA  
TCGCAGCTTCCAGCTTTCGCGCGATATCTTCTTACGACGACCGATAGCCCCATAC  
CGCGCCCTGGTGACCGTAAGCGTCGATAGGAAGCCTAGGCCTTTTTTGAACGAGTT  
CCAAGCGGCGTTTCAGTTCGCTCGATGAGAGACCGCTGACGCTCGATATATGCTGCGC  
CCTTCCGAAGACGCACGAT

>CONTIG\_147\_length\_3359\_cov\_4.760520

GTCCCAGCACGTCGCGGAGCTCATCGACCAAGAGCCCGGAGTAAGCGAGCTCGAGC  
GTCGGCCGCTGGTCAGCGTACCCGATGGCGTGGTTCTGGCGCTCCCTACAGCGGTCA  
CCGTGGCGATCCGCCAACGGGTCATCGACCTCGTGCTGGGCACCCGTCAGGTAGGG  
CACTTCGACGGTCACTACGCGCGGGCACTGTGCAACGCTATCGCGGACACGACGTT  
GCTGGGGTTGAAATCAGGCTGCCCGGTGCTCTGGCACCCAACCGAGGGAGGCGCGC  
TCGCCGGAGTCGTCGTTCCCTTCGACCGTGGCCATTTTCGTCGTACTCCACTTTGTGCT  
GCCGTCCGTGGAATCGCATGAGCTGGGCTGGTTCAAGCGTCCCATCGACATCCATCC  
GACGCTGCAGAAGGCCCTCAACTACTCAATCACGTCCAATACCCAGCAACTCGAGA  
GTCAGGACGACTTCCGGGGTGGGATGCATCTCGTCGTCATGTGCGGATGGGGCCAG  
GGCATGGTCATCCCGGTGACGCGCCCTGACGACGCGCGTTGGCGTGCGAGGCGAT  
GTCGGTGGCTGACCTCGTCCGCGCCAGCAGCGTGGAAGACCTGTCGATCCAGCGTCT  
GTGGCGCCTTGTCTCCGCCGAGAAGGCGCTGGTAGACGCCGGCGTCGAGTTGATGA  
ACGTCAACGGCGTGCTCAACCTCTTCGCCTGGATGCAGGAGAACGACGGGCACCTG  
GTCCCGCACGGCGACCTCGACGATGGGCGCATCACCCCGGAGCAGCGGCTGATGGT  
GTCCCTGCCGCTGAACCTGCTCCGGGATCTCCGGGCAGATGCCGATCGGAACGTCGA  
CGCTCACGTCGGGCTCGATCCGCGGAGCGAACCCCATCATCTGCACCGGGTCGATCG  
CGGCTTACTGTTCTCCCATCCCGCAGCCGAGCGGCTTTACGCATGCACCGAGTGCCT  
CCGGTCCGGCACGTTGTTGGCCGCCTGCGAGGGGGCGCACGACGCTGTGGCTCCGTGT  
CGATTACCGGGCGTGTCCTCGCGCGATACCGAGTTCGGGCTCTGGGACATGGTCGG  
CCGTTGGGGTGCCTCGGTCGCGGCAGCGCTCGAGGACGGCACCGACATCGAAGGTG  
CGGTGGAGATCACCATCGCATTCGAGGACGTCCAGTCAGAACTGGACGCTGTGGAC  
GCTCAGATTCCGACCGATCCGCTCGAGCTCCTGCGGGTTGAAGTGGTCGGTACAGGG  
GCCGTCACCGTACACGCAGCACGCGGGTTCCTCAATGCATGGAGGGAACCGACCAA  
CGCCGGCGAGCGCGCTCTGGTGACCGCGATCCTCCAGGCGGTTTTTTCGGATCCACTA

CGTCGAATACTCCGAAGCTGAAGTCGACGGGCTCGTGGCGTCGCTTCTGCCCAACGA  
GACGGGTTCGGCACTTCCACGTTCTCCACGCGCAGGATTTACCCGATTTTCGTCCGGGA  
TGCCTGCCGGGCGAGGTCTTGGGAATCGACGAGATCGAGAGCGCGACGCAGCGCA  
TCGGGCTAGGCTGGTCAGTCCATGACGGCGATAACAACGTCGAGGGCGCGGAAGCC  
TGCCTCGGACTGCTGAATCGGCTGGTCGACGCGCAGGTGGGCGACCTGACAAGCCG  
CCTTGGTGAGCTCGATCGAACC CGCGTTGGTTGAACGGCTTCTGCTCAACCACGAAGC  
CGCCCATGTCCGGGAGCTGCAGTGGCAACGGACGTCGGCGGCGGTCTTGGCCTGC  
ATGGCGATTCGCAAGACGTGCGCGATGCCGTGGTCGGGCAACTTTCCAAGTTGGCCG  
GGGCCGCGATCACCAGCCGCGTTCTTGTTGAAATCGCCGCCTGCGAGGCACCGCTCA  
CCGGTGGGCGCCTGCCGGATGACTTGCAAATTCAGGCGCTGCTAGCCCAGGTCGAG  
CTCGTGACCCGGTTGGGCGGACTGTGCGGACGGAATCCACTACGGGGTATTGCGGCC  
ACACCTGCGCGTGTCCGCGCTCGGCGACATCCTCCTCCGCGATGAGTTCGGGCGCGA  
AGTCGTGGCCCCCTATGCTCAGCCAGGCCGTGGGCAGCAACTACGTCGACTCGGCCG  
GCGGCTTCCGTGCGCCACTACGGACCCCAAGAGGGTGTGCGACCGCACGGAACACCTC  
CTGGAATCTGAGTTCCTGGAAGCCTGGCAGGGGGAAATGGGCTTCGGCGTTGATGA  
GGCACGCCACCTTCTCGACGCGATCGAGGACTACGCGATCAAGCGTCGTGCCCCGA  
CCTTGCAAATCAGGCACGGCGAGCTCGTTGCGCTTCTAGCTAGCCGATGCGACGCGG  
CGACCGCCGAGAGATTCATCGATCAGCTCCTCCTAGCTCGACGCCCTCGCTGGGCGC  
AGCCACCCCAAGGCTTCAGGTCGCGCGAAATTCTTCCTTGGCGCTTCGGGCGCCGCC  
TCTCGATCGTCACTCGCCCGATCGTGCAGATGAACGACGACGATGATGCCCTGTATA  
TGCTCGCCCCCGTCTGGTCAGAAGCGCCTTTTTCTATCTTCTTCGCGGCGCATTTC  
TGGCACCTTGGACCAGAGCTTCTTCCAGACCCCTGCGATGCGCGACGCGTGGTGGGG  
AAAAGCCAACGAGGGACATACCTTCAATGCCCTAGTCGCCGATCAGCTTCGCGCGG  
CGGGCTGGGAGGTCCGCGCCGGGATCGAGCTGACGGCCGTTCTCAATGCCAAGCTC  
GACCGTGACTACGGTGATGTGGACGTCCTCGCCTGGTGCCCCGGCGGCGAAGATGT  
CTTCGTGTCGAGTGCAAGGACTTGTCGTTTTCGTCGGAATATTCCGAAATTGCAGC  
GCTGCTGTCGGACTACCAAGGCGGCTTCAAGAATGGCAAGCCCGACAAGCTCAAGC  
GCCACTTGATGCGGGTGGAGTGCGCTGCCTCTCACCTGCCCGCTGTGCTCGCTTCA  
CGGGCGTCGCGGCGCCGAAGATCAGGTCGTGCCTGCTCGTGGCCGGCCTCGTACCG  
ATGCAGTTCGCATCCATCCCGGCGCTGGAAGGCACATTCGTCGGCGATTTGGATCAG  
TTTGGGGCGCAGTTCGGCCAGTGCCGGTGTCCCGGTACCTGATCGAACTCCCTTAGG  
TCGCGCGGGCGCCCGCATCACGCGACGCGATCAGGGCGTAAGAATGCATCAGCCGGC  
GCTAGCAGCGAGCAATGCGGGGCGTGTTGCGGGCGTAGGGTTGGCTCATCGCGCCG  
GGAGGCCGCCATGCCAACTGACCATCCCGTTCTTCGCGAGGAATCTCGACCCGTC  
TGAACACGCGTTCGTGCTGATCGACCATCAATCGCAGATGGCGTTCGCGACCAAGTT  
GATCGACACCGTGATGTTTCGCAA

>CONTIG\_148\_length\_3268\_cov\_17.808978

GGGCGATTTGGCAGGCCGCCCAAGAGGCGGCCAACGACGCGCTGCGTGACGCCAG  
GCAGGGTGGGAAGCCGAGCGGCAGGAGGCGGAGGCACTGAGCCAGCAGATGGCCG

ACGCCTACGAAGCCCAAGCGCTTGAGTTGGAAGCGGCCCAAGCACGGATTACCGAG  
CTGGACACCGCCATGCAGCAGGCCGCTCGGCCGCAGTCGCCCACCAGGCCGCTTTT  
GACCAGGTGCGCACCGAGCTGATGGACTTACAGCAGCGTGCAAGCACCGCAGAGGC  
CCGCGCCAGCGAGCTACGCACCGAGCTGGATCGGGCGCACCTGGTTGCTGCCGAGC  
AGCGCAACGCTGCCGGCCAGGCTCGCGAGGACGCGGGCGAACCTACGGGGTCGGCTG  
GCAGCGTTTGAGTCGGTGGCCACCTCGCCCCCCCCGCCAAAGGCCGGCCAGGCCAA  
GCCGCGCGGGCGCGGCCAGCTAAGCATGCATGCAGTCGTGCAACCAAGCATGCT  
TGCATCTAAAGCAGCTTGCATGCGTGCATGCATGTTGCTAAGGTATTGCACACTTGC  
CCTCAAGCAAGCGACTTCCACCAGGAGCGCAGTGCATGAAAACCATCGCCATCGCC  
GTCCAGAAGGGCGGCTCCGGCAAGACAACGATCGCGGTTACCTCGCGGTGGCCGC  
GCAGCAAGCCGGTCTGCGCGTTGCGCTGGCCGACACCGATCCGCAAGGCTCGGCCA  
AGGGGTGGGCTGAAACCCGCAAGCATTCCACGCTTGAAGTGGTGGCCATCACTTCTG  
CCAACGTTGGCGCAGCGGTCCAGGCCGCAGCCGAGGAAGGCTATGACCTGTTGATC  
GTGGACACCCCCCGCATGCGTCAGCCGGCATCGCGGCCGCGCTAGAGCATGCAGA  
TCTCGCCTTGATGCCTGTGCGCCCCGAGCCTGCTGGATCTTGCCGCCGCGCCGGCCTC  
GATTCGGCTATTGCAGGCCAGCGGCAAGCCGGGGGCGTTTCATCCTGTCCAGCGCCCC  
GATCCGTGCCAGTGAGACACGGGAAGTGGAACGTGAGCTGGCAAGCACCGGCATCC  
CGGTGTTGCAAACGGTCATCCATGATCGAACGGCCTACCGGCGCGCCCTCGCATACG  
GCCAGGCCGTGGGCGAATTTGAGCCGGCCGGCAAGGCCGCATTTGAGATTGCGGCC  
CTGTGGCGCGAAGTGCATACGCTACTCGGCGCAACCAAAGGAACCCATGTATGAAC  
ACAGGACTCACCGGCAAGCTCGCCGCCCTGGACAAGACCAAGAGCCAACCGGATAA  
GCCGGTGCGCGCAGCACAAGCCGAATCCAAGCCCCAGGCCGCCGCGCGCCAGGCCG  
GCACGGCCAAGAGCGCGCCCAAGGTGCTACTCGCACGATCACGATCCGTTCAT  
CTGACCGACGATGACCTGCGCCGGCTTTCCGAGTTCCGCTACACCCACAACATGACC  
ATCCAAGACATCACCATCAAGGGCATCTCGATGTTCTCGCCTCGATGGGTCTTGCC  
CCGCTGTGCGCCATGTCCGACACCAGCGATTCCGGCGACGCCGAGTAACGCATGCG  
CGCATGCAACGCAGCTTGCATGTTTAGTTGCACGCATGTTTCGCATGCGAAGCTGCAC  
GCAGGCATGCATGCGTGCAAGCTTGCAGCTGTGCATGCATGTCAGCACCGTACAGTG  
CATGCACGCATGCAAGCCGGCTTGCATGCGTTTCCGCAAGGTGCATGCAAGTCTGCA  
AGCCGCTAAAGCAACTTGCATGCAGTGGCGTGATGCCAGGCTTCTATCGCCTGCAT  
GCAAAGCGTCAAGCATGCGTGCATGCAGGTCTGACGATGGGCGCCCAGGTTATTGA  
AGCCTTCGCCAAGGGCTGGACGAACCGGCGGATTCTGGCGGGCAAGCCGCGTCAGG  
TTGGGCGCTGGGTGATCGGCGAAGATGGCACCCGTCGTCGGCTTCTGAGCTTCGCAC  
CTGGTGACCGGTTTGCACCTCGATCTATGGGAGCAGAATGACTACGGAACAACGCGG  
TGGCGGGTTGTGCTGTGTGAGGCATTACCGGCCGACCAGGCGGGCGAAAGCGTGCC  
GGCAGTGCGCCCCGATGTCGCCATTCTGGCCGACATCACAGGCGCAACGCGGGTGC  
GCGCTTATGTGGCCTGGTTAGCCCTGAATCGGTCAAAAATTGACACTCTAAATCGGC  
TAGAATTGGCGCGTATCGAACAGTTTTTCCAGCGCATGCCACTGGCGCGGTTGAAGG  
TCTTAACCGCCGACGTGAGAGCCAACTCCCCGCAAAAGGCGAGGTTAGCGGCAT  
GTCTGTGACACGAAAGAAGCTCATCAAAGGGCTAGCACTCGGCCTAGGCCTAGCAG

TGATTGCCCCCGCACTTGGATGGGCAAGTGCGCGCGGTCTGGCCTCGCTAGGTTTCA  
CCGTAATTGCCAACCTTTTCGCCAAGCGTGGCGCAAGGTCTGTACCTCCTGAATCGCA  
ATACGCATAGCGCAGAGCGGGGCCATCTGGTCGCATTCTCTCCACATAATGCGGCA  
GCGCGTTATGGCTTTGAACGCGGCTGGATGAAGCCCCGAAGTCTTTACATCAAGCGT  
GTCGGTGCGGTTGCCGGCGACACGGTGTGCGTGAACAGCGAAGTCAGCATTGCAAC  
CCCAACGACCGCAGGGCACCCAGCCACCTATCGGCGTGTGGGTGCGGTCGCTGCCA  
CGGACCGAACAGGTGTGGCATTGCCTCACGTCTTACAAGGCTGCACGCGGGTTCCA  
GCGGGGCACATCTTCACCATCGGTGATGGTCTCGCTAACAGCTATGACGGGCGCTAT  
TACGGGTTTCGTTCCGCTGTCGGTAATCGCCGGGAGCATTACACCGTTGTGGGCGCAA  
GCGTCTTCGGTAGGAGTCGATCATGAGTGACCTGATGTCAGTGATTCTCGCTTGCTC  
CATCGGTGTGCATCCGCAAACCGTGCAGGCGATCATCAAGCATGAGAGTGGCGGCA  
ATCCGTATGCCATCAACAACCAGGTCCGTAGCTTCTACCCGACCCGGTTTGACGATG  
CCCAGCGGATCGCAGTCGAACAGGTGCGGGCCGGTTCGCAGTACCGATATCGGGCTG  
ATGCAGATCAACTCACAGCATCTGTCCAAGTTCGGAGTGTGCCCGGTTGACCTACTA  
GACCCATGCACAAACATCCGCATTGGCACCACCATTTTGGCCCCGGAACACGCCAG  
ACATGGGCCAAATATCGCGCCGAAAAGCCTGCGCTGCTGGGCGCCTTGTCGAT

>CONTIG\_149\_length\_3264\_cov\_38.388588

TCACCGATGAAATGATCGAATGCTTCGTGGTCTATTTGGCTGGCCACAACCGCCCTA  
CGCACGAAGTACTGTTTCGGCAATGACAAAGACATCGCCGGGGAGTACGAGCGCGCC  
TTTCAGGGGCATGACAGAGACGCCTTGCCCCGCTGGGTGTACTGCTGGAGACTCGTGCA  
CGGCTGCGGCAAGAATTGCCCGCGCGCCTCTCTGAGGCCACCGAGGTTTCCTGAGT  
GGATTGGCGAGGGGAGAGCCCGAGTGGTCATTGCTGCAGTGTGCGTACGTCTGAACA  
GTTGCCAGCATTACGTTGGAAGCTCACCAACCTAAGGACGTTCAAGCAGCGTCGGC  
CTAGTGATTTTCGCGGCCAGGCCGATGCCCTGGATGCTGCGCTCGCTGCATCCAGGA  
CCTGAAGTTAGTCCGGCTGAAAGACCACGCCAGATCAGCATGGCCGCAGCGGGTAA  
AGGCTTTTGGAGGCTAGGCATTGTGCTTGTCCGGCATCGCGCACGGGTACCTGTCGC  
GATGCCCCAGAATGATCAATGTGGGGGCTTGATCGCAGACAGTCGATCAGGCTGGC  
AAGGACATGTCATCCTCGTGCTCTGAAGGCGACTGCTTCGTGCGAGGATGGGTAATG  
TGCTCTAGCTCTTCGAAACTCATGTCTCGCAGACGATCCAGAAACGCGTGATATTCC  
TTGTCTCCGCCAGTCATGCGGGTCAACAGAGCGCACTGAAACATCAGTGAGTCAAG  
AAAGATGCGTTGATCTTTCAACCCCTTAAATTCTGCCACACCCCGTATGATGAGCTC  
GCAAGACTTACTTGCGGGCACGGAAATTAAGCTGCTGTGCTTCGGAAGGTTTCATGTC  
GGCCCCCTTGGCCTTTGGTTCGCCAGTTGCTCTCAAATTTGACTCAGAACTTGTGCG  
TAGATACTGCGTTAACCGCTACGTATGACGACTGTATTTCTCTCAAGAAATAGCCAT  
ACCTTCGACTGGATGCTCTCCTTGGAACCAGCGCCAGGAGCCTTTTCCCCCGGTCT  
TTTGATTTGATACAGGGCCCGGTCAGCGCGCCGCAGTAGTTCGTGCTTATCTGCAGC  
TTGATCTGGATAGAGGCAGGCGCCAATGCTGACGCCGACGCTAAGTTTTAGGTTGTC  
CACCAGAAGCGGCGTATTCACCGACTCCAGTATGCGGCTGCAGACCATTTTCGATATG  
AGACAGGTCACTTGGTGCAACAAGCAAGATACCGAACTCATCGCCACCGAGGCGGC

ATACCAAGTCTGTCTCTCGCACAGCCCCCTTTCAGTCGCTCTGCGATGATCTGAAGCA  
CGGTGTCACCTACCGCGTGCCCATAGGAATCGTTGATGGGTTTGAAGTCATCAAGAT  
CCAGCATGAGGAATGCAAGACGACGCTGCGGATCTTCGGAGACCTCCGCATGCCAA  
CGCTCGCGAAGGCCACGCCGATTGGAAACACCAGTCAGATCGTCTCGATAGATCAG  
CTCCAAAAGCTGCCGCCGATTGGACTGCACACCAGAAAAATCTTTGAAGATCGCTA  
CCGCCAGCTTCTCGTCGTGAAGTATCAAACCCGAGTGCAACACCGTGCGGATTGACC  
CTCCGCTGGTCACGACATCAATCTCCATATCACCGGTCGCAACAGGATGTGCCGAGT  
GATGCAGTTCGATGTCTAGCCAGCGCTTGCGTACCATCTCGCGCTGCCGTTTCATGAA  
GATAGAGGCTGTCCACGAATTGATCGACTGTACGGAAGTGGCTGGCGTCGTGGCCG  
AATAGACGAACGAACTCCGCATTGCAGTACTGAATTTTTCCATCAGGAAAGCTGGCC  
CACGCGATGCCGAACGGAAGAGCGCTCAGCACTCGCAGCAGGGTGCTCGCCTTTGG  
TGGGGTGCGTAGTTTCGTCCTCATGCTGAACCATCATGTCCTTGCTCCTTTCCCTCAAG  
CGCATCGGGGCATTGCTGCTGATGCTCCAGGCCTCGATGTGTGGCAAATCTGCATCG  
TGGTATCGCCCGTGGCCATCGGCCCGCTGCAGTCCAATGCATTGATCCGTGCCTATC  
CATTATGGGTTATTTTTAACTCATTGAAACAATGCTGACCAGGCCTCGGCAGCGTTG  
ATGCCAGCATGGCTTTAGCTGCTTTCAGTCATAGGAGGTCTGGTTGCGGCCAGCGTG  
CTTGAGCCGATAGGTTCGGGTAAAGGCGCAAAAGGGGAGCGCCACATCCGATTGAT  
GCTCGCTAGTGATTGGCGGAAATGGTGTAACCCAAAGGCAGAAGGGTAGAAGGGCG  
GTGCTAAGGGAATGGTGCCCAAGGGAAATGGGGCTACCTGGAAAAGGAAAAAGGC  
CATCCCTGCCCTGCATCATCACTGGGAGTAGGCATGCTCAGATTGTTTCAACGAAAG  
GCCGCCGTCTGCCACCTGTTGCGGCAGTGACCGAGACGGCGCCTAGCAAAGGGCT  
GTTGCAGCCCAAGCCGGCAGCGGAACACTACTGGCCACACCTCGACGCCAGAAGCTTC  
TGGAACATATCTGGCAGCGTACCTCTCTATCCCGCAAGCAGTTCCACACGCTCTATC  
GAGTCCCGCTTGAGCGCTATGCGGATCTTGTGCAGCAATTCCCAGCGTCTGAAAGCC  
ATCACACGCGTACTTGGGAGGCATGCTGGATCATGGCCTTGAAATCGTCGCGTTTCG  
CGTTGAAGTTGCGACAGTCGCACCTGCTTCCCGCAGGAGCTTCGCCTGAGGACCAAG  
CGGCGCAAGCGGAAGCTTGGACTGCAGCTGTTGCGTATGCCGCGCTTCTACACGATA  
TCGGCAAGATCGCTGTTCGATCTGCATGTAGAGCTGCAGGGGGGGAGGATCTGGCAC  
CCCTGGCATGGACCACTGAGTCAGCCGTATCGTTTTTCGCCATCGTGAGGGGTCGCGAA  
TATCGCTTGATGGGGCTGCGACTGGATTGCTCTACAGCCGGATACTCGATAGCGCC  
GCGCTTGACTGGCTCAGCGGCTATCCAGCCCTATGGTCCCAGTTGCTTTACGTGCTGT  
CTGGCCAATATGAGCATGCTGACATGCTTGGCGAATTGGTGGTCCAGGCCGATCGCG  
CCTCGGTTGCGCAGGAGCTTGGTGGAGATCCGGCGAAGGTGATGGCCGCACCAAAG  
CACGCATTGCAACGCAAGCTGCTTGAGGGGCTGCGCTACCTGCTAAAAGAGCAGCT  
GAAGCTGAACCAGCCAGAGGCATCAGATGGCTGGCTCACGGAGGATGCGCTATGGC  
TGGTGAGCAAGACTGTTTCGGACAAGTTGCGTGC

>CONTIG\_150\_length\_3241\_cov\_13.918112

CACTGGAAGATACCGAGTTGGTGGGTGCGCTTTTGGCTCACGTGGGAAATCGGACC  
GACGCGACAATCCGTAACCAAGCGAGGTCACCTCGGCGCGTTGCGAATGGCAATCTC

GATCGCTGAAGAAAGTCACAGCACGCATTGAGCCTGGTCGCCCCGCCCTGCCCATCG  
CGCGTCGTAGGGTTGCAGCCGCACCGATGGTCGGTTACAGCGTGTCTGCCAGTGGGG  
GCATCCCCCGGTGTTGTGCCCGCATAGCCTCTAGGCTCCGGGTGCACGAGGTTCTCC  
ACTAGGAGGCACGGGAATCTTCAGAGCGCCAGGCTCAGCGGGGGCGAAGCCTGACAG  
CTGGCAAAAAGGGCCTGGGAGAACTTAGCGAAAGGATCATGGAACGGAGGAAAGG  
ATAGTCTTTACCTGTCTCAATGACATGTGCTGCCTCAGAACCCTGCCATCAGTCAGA  
AGCCTGTGTCGTCAGACCGCCAGGCGTTCGGCGATCCAGTCCATCCAGCCGAGGCGCG  
CGGCCGACGCGTTGGCCGACAACGAGTCGCGGGCCGTCGATCACCTCAAGGGCGTGG  
TGATGTGCCCTGGGATGGCGGCTTCATGGTCAAGCAGCTTCGCCGCCGCGGTGGGGC  
GCTGGAACCTCATTCCGTCAACCGCACCACTCCCCGATCCTGGTGTCCGAAGACGTG  
GGGCTGGACGCGTGGGGCGTGGTGACTTGGAGCTTTCAGAAGCAGTTGCGCCGATG  
GACGCCGGCCTACATGATCGGCCCTGCGGTTTATCCCGCTTCGCGCCCTGAGTGCC  
TTTGATCTGATCGTGGATTCGCTTGTTTTGCTGCCACGCCTTGCGTTTCTGCCACCAC  
TGTTTGATTGCTGCCACATAACCCACCTCCATGCATGGACTCGTTGACGGAAACA  
ACTTTTACGCCAGCTGCGAAAGGGTCTTCAACCCCTCGCTGCGCGGGCGCCCCGGGCG  
TTGTGCTTTTCGAACAACGACGGCTGCACGATTGCTCGCTCCAGGAAGTCAAGGACTT  
GGGGGTTGGCATGGGCAACCCATCCACGAGATCCTGCTGGACTTGCTGAGGCAGCT  
GAACGTGTTATCGGCCAACTTGGGCCCTTATGGAGACCTGTCTTGGCGGTTCGGTCTC  
AATCCTGAGGGACCTCTTTCCCCAAGTCGAGGTCTACAGCATCGATGAGTCGTTTCGT  
CTCGTTTCGATAGCATCCCGGAAGCCGAGCACGAGCGCGTGCTCGGTTTCGGTCGCGG  
CGCGATGGCCTTCGCCGATGAAACGCAGCCTCGTAGACCATGGACATATCCCATTC  
CCCGGGTCAAGGCATTTCGGGAGGGTCTACAGACAGTCTTTCTCCATCGCTTCCGCC  
TCCGCTTCGATTGAGGCGAAGAGGGGCAGAAAGCGCGTTTTCACTTGAGCAAGGTA  
GAAGCGCTGTTCTTTGACCCGCAGCACAATTTCTCTGCCATGAAGCAGAAGACGCC  
TCTGCGCCTTCGTGTGACCTGCACAAGCATCCCTGTCCCCCAAAGCAACGATTGAGA  
TTGGGCAGGCAGTGCCCCGGCCGCAGCAGCGCGACCGGAGCACTCCATCCCTTTACTT  
CTTCAGCAGGTCACGAGCCGCACTTTTAAACTTGCGTCCGATCTCATCTCCTGAAGG  
CGACGCATCGGGATCATCCGTAAAAATGGTTACAAGGGTCGCCAAGTAGGCTTCAC  
CGAGCGCAGAAGTGAGCGCCATCGCGGTTCGTTCCAGAAATCGCGGCGCCTGCCACC  
GTGCCACGCCAGGAATCATCTTGATCAGATTGCTCACAATTGCTCGGCCCGCGAAG  
CTTGCTCCTGCCACGCCGATGGCCGATGTAATCAGTGAAGTGAGCATCGAGTTCGTT  
AAACTGATCCCAAAGATAGACGTGATCTTCGCAATCATTCCGATCTGCACCGGCGCG  
ATGATGGCTGCGTCCGAAAAGGGAATGGGGCTAAGGCCCCGCCGTTCCAGACGTAGC  
CGCGGCGGCAGCGATGATCTTCCTCGCTTCCGACTTTTTTTGCGTTGATATCCGCCTTT  
TGCGAAGCGGCGAAAGCCCTCCGCGCGCCCTCAGGCAGCGCGCCCAGCGTCACTTC  
AACTAGGGTCTCAAGTCCTTTCGCGGGGAGTGGAATCTCATCATCAATGAGCTCCGC  
GATTGCCCTCACTTGGACAACGTTACGGCAATGAGGGAGAAGACGTTTCGACTTCCTT  
CTTAAACCCTTGGTCAGAACGATTTTTAGTGATGACACCTATGACCGGAACCACCTT  
GGCCAAGCTCTCATGAAGAGCAACCTCTGCATCTTCCACTCGACGTCCGTCTTCGTG  
AATGCAAATCCATGCAACATGGATGTGCTTAGCAGGATCGGTTTTCGTTTTTGCGTGC

TTGGATGAACGCTGTAAGCTCATCAATTGTTTTTTGTATTTCGGCCATCTCCAACCCG  
CGAGAGTCGAAGATAGAGACCGGGATACCTTCCTTGGTGATCTCTCGTGTCTCTTTC  
GTCACCGGCTTGCCTTGTCCGTTTTCGGCCAAATGCTCGTGAAACACGACGTTAATC  
AATGTGCTCTTGCCACACCTGACCGGCCAGCGATCAGGATGTTACATGCCCCATG  
GTCTTTGCTGCGTCCGTTACCGCGTCCGCGATGGACGACGCATAGTTGCTTTCCATA  
AATCCCCCTGTCTTCCTTTCAAATTAGACAACATACCTAGCGAACCGCTGTTGATG  
CGGTGCGGAAGATCTTACCCACAATGGGAACCGTGACTCACCTCAGCTTAGTTTAAG  
ATTACGGCGGATAGGTCTAGGAAGTTGCGGGCTCGCAGCTGTTCCGGTGAAGCTGTTGC  
CTTTTGCGTCCCTCAGCTGCGCCATGAGGTAGATGCCTTGCCGATTGCTCTTTCTTGC  
CCACAACCTCCCCGAGCATGCGCTTTTCCTTCTCGAAATATACGGAGTAGCGGAGATG  
AGCGAGCAGGCTACATCGCCATCCGCGGCCCTGTTGCTGCTGGGCTGTCTGCTGCT  
GGGTTTGTTCCAGCGCCTGTTGGCGCACCTGATCTTGCTTGATGACCTCAGCTTGCTG  
CAGGTTCTGCTGGGCCGGCTGTTGACACGCTTCTCGACCGTCCACGTGGGCATGGAA  
CTGCGGCGCTTTGTCTAACCCGTGAGGGGCATAGATCGCAACGACGTTCTGAGCGCC  
ATCGTTCCCCAAGCCTCCCGTGACCCTGTCCACCCGCTTGAGCAACGGGTCGTCCAC  
CTG

>CONTIG\_151\_length\_3204\_cov\_23.313292

GCAGTCCCAGTCCGGCCGCGGCGGGAAAGCCGAGACCGGGATGCTGGTTCGAGAAAT  
GCCATTACGTCTTATCCAACCACTGCGCCGAGTTTGAAGATCGGAAGATACATGCCG  
ATGACCATGCCGCTACGATGGTGCCAATGAAGACCATGATCAGTGTTCAAGCAG  
GCTGCTGAGCGCGTCTACGGCGTTGTTGACTTCCTGCTCGAAGTACTCGGCAACTTT  
GAAAAGCATAGTGTCAAGCGCACCTGCTTCCTCGCCAATGGCAGTCATTTGGATCAC  
CATGTGCGGGAATAAATTGACCTGTTTCATGGCCATGTTGACCGGGTAACCCACCGA  
CACATCGTCTCGCATGCGAAGCACGGCTTCTTCGTAGACTTTATTACCTGTGGCGCC  
AGCCACAATCCCTAGCGCCTCCACTAACGGAACACCGGCTTTAAATGTAACGGCAG  
TTGTGCGGGCGAAGCGCGCGATCGCGCTGTTGTGCATGATTTGGCCTATGACCGGTA  
CCTTCAAGATAATCCGATCCATGCCGTGCTGCATGCGTGCGGAGCGCTTGTAGGCAT  
AAATGAAGCCGATGACTGCCCCCGCTACAATGACCAATAGAGCCCACCAGTAGCTA  
ACCATAAAGCGCGACGCGGCTACGATCATTTGTGTGAAAGCAGGTAATTCCGCACC  
AAAGCCCTTGAAAACCTCTTCGAACTGTGGGACTACGAAAACCTAGCAGAATTGCGC  
TAACCACGAGAGCAACTACGACGACCATTGCAGGGTAGAAAAGGGCTTTCTTGATC  
TTGCCCTTCAATGCCTCAATATTTTCTTTATAAGTCGCAACTGTGTGCGAGCACGGTTT  
CTAGCACGCCTGCCCCTTCACCTGCGCGGACTAGGTTTCGGTAGAGCTCGTCAAATT  
GGACTGGATGTCTGCTAATGGATTCATGTAGGGACGAGCCTCCCTCGATATCGGTTT  
TTATCTGACCAACCATTTGCTTCATTCGTGGGTTTTTGTGACCCTCCCCAATAATTTT  
CAGTGAACCAACAATAGGTACGCCGGATTTTCATCATGGTTGCCATTTGGCGGCTAAA  
GAACGAGATGTCCTTAGGAGTCACTTTTTTGCCTGCCGCGCCAAACAGTGGCTTTGG  
CTTGGGCTTAACGACGTTTGGTGTGATGCCTTGCGGACGAAGTTCGGCACGCAACAT  
GTTTATGTTGCGCGCCGCTTGCTCTCCCTTCATCTTGACGCCGCGCTTGTCGGTTTCCTT

CCCAGATAAACGGCTGCAGCTGGCTTGTGCTTCGATCGACTGGTTTTTTGATGACGT  
TGCGAGCGACGGACATGCGACTTTCCTCATCGGCCATCCCCAGGCCGGATCGGTACA  
CATAGTAGCTTGTTTGAGAGACCGAGGCACCGTGACTCAAGGGCGTGTGGTGATGTC  
GGGTGGACGCCCTGTCTGGGGCCTAAAGTGACCGCCTGCGTCACATTGCAGGCCACG  
TCGCAATTGTGTTTCGAGGGCCTGAAAATCTGTCCGAGGTCTGTCACTATTTGGTTCG  
GGGAAGACTCACAAGCTGAAGATGCGAAGTTGGCACGAAAAATGCTTATGATCTTA  
TCGCAACACACGCTGAGGCTGCGATATTGCTACTGAGCCCAGCAAAAATTCCACAT  
GCCACCTCCAAGGGGACGTACCTATGAAGAAGCAACAAGGCTTTACTTTGATCGAA  
TTGATGATCGTAATTGCGATCATCGCAATCCTGGCTGCTATTGCACTGCCGGCTTACC  
AGGACTACGTTGTCAAGTCGCGCGTCTCGGAGGCCATGGTGTTGGCTGACGGCCTGA  
AAGTGGTAGTGGCTGATAATGCTGCCCAGGGTGATGGCAACCTCGGCAAGGGGGCT  
ACTTTGACCACTGCAGCCGATGCATCGCCGAATGTAACCTCCACAGCAGTTGCAGCG  
ACAACCTGGTGTTATCACGGTTGTTACTACAAGTAAGGCTGGCAATGGCAACGTGATC  
TTCACGCCGCGTGCGGGTGGTAATAATCTCGCCGCCGGAACCTCCGCCGGAAGGTAC  
GATCGTGTGGACATGCACCGCTACGATTAAGCAGAAGTATTTGCCGAGCAGCTGCA  
CCGGCACCTAAAATATGTACTAGTTTTTAGATTAAAAGCCCCTTGCTGACAGTGAGG  
GGCTTTTTAGTTATAAGATTAAAGTAGATGCAAAATTGCAGTCAAAAGCGAGGGGG  
CGGTATGAGGAAGATAAATGGATTCACCCTTATCGAGTTGATGATTGTTGTTGCAAT  
AATTGCAGTGCTTGCCGCAATTGCTATGCCGGCTTATCAAGACTATGTTGTGCGTAC  
GCGGGTATCTGAAGCTTTAGTGTTGGCAAGCGGATTGAAAGCTACTGTGATTGTCAA  
TGCTTCGGAAAATTCAGCGGATTTGTCTCGAGGCGCCTCTCTTGTCTCAAGTTCTGAT  
GCTTCCGCAAATGTTGCATCTACTTCAATTAATTCAGTGAATGGCGCTATTACGGTG  
GTGACTACGGCAAAAGCCGGGAATGGATTAATTACTTTGACGCCTCGCGGAGCTAG  
TGGTTCGGCTTTATCTGCAGGGACATCGCCCTCAGGTAATGTCGTGTGGACTTGCTC  
GTCGACAATTAACAGAAGTATTTGCCATCGACGTGCTCGGGTACTTAAAGCGGTTT  
CTGTCAAAAAATGGAGGGGCATAATGAATGCTGGGCCTGCCAATAACAATATTAATC  
TCGTAGGTATAACCGGCATTGCCCGGCGATTGGTCCAAGACGGTGCCCTGGACGAA  
GCTAGTGCTCGCTCCGTCATGGATCAAGCAGCCAACGCAAAAGTTCCTTTGCCGCAA  
TGGTTCGCCGAAAAAAAGTTGGTGTCGGCAGCGCAGCTCGCCGCTGCCAATGCGGTT  
GAGTTTGGCATGCCCCTGATGGACGTTTCTGTCTTTGATGCCAGCCAGAACGCCGTC  
AAGTTAGTCAGCGAAGAGTTGCTCCAGAAGTACCAGGTGCTGCCGCTGTTCAAGCG  
CGGCAATCGGTTGTTTCGTGGGGGTGAGCAACCCAACCCAGACCAGGGCGCTGGACG  
ATATCAAGTTCCACACCAATCTGGTGGTGGAGCCGATCCTGGTTCGATGAGGACCAA  
ATCCGTCGCACCTTGAGCAGTGGCAGGCGAGCAATGCGGCGCTCGGCTCGTCGCT  
CGGTGACGACGATGACGACATGGGGGA

>CONTIG\_152\_length\_3175\_cov\_7.470801

TCGAACGCTTGCCATTTTGCAGCGCGTGAGTGGCAACACGTCCGTTGCCCGGATTGA  
TCACACGCATATCTACCAGATGTGGGATCTGCTGCGATGGGCACCCGAAGACTTCAT  
GACCAACCCCAAGAATCAGTGGTTGAGCGTCGAAGCCTTGATCGCCAAAGGTCAAC

GTCTGGGCGGGCGCAGCCTGCCAATGCCACATTAGAACTGCACCGGCGCTTCCTCG  
CGTCCTTCTTCAACACCTTAGTCAAAGCACGTGCCATCCCGCACTCGCCGATGGATG  
CGTTTAAGCCTGCCAGGGAAGAGCTGATGGCTGATCAGGACGAGCCCGAGCGTCTG  
CTCTCGCCAGAGGAAATCCAGAAGATCTTCAACCCCGAGACCTTCCTGCCTTGGGCC  
AAGAAATATCCGCACCGTTGGTGGTGCCCGCTCATTGCCCTTTTCACGGGCGCTCGG  
ATCAATGAGATCGCCCAACTCAAAGTGGCCGACATCGTGCAAGACCAAGGCGTGTG  
GTGCTTCTCGATCCAGAAGACCGTGGATGAGGACTTGGCGCAAAGCGCAGGCAAAC  
GCAGCCGGCAAAGCCTCAAGGGCAAGAGCGCCATCCGTAAGGTGCCGATCCACGAC  
GGTCTTCTCCAAGCAGGCTTCCTCGACTTCCTGGCCGACATCAAAGCGTCCGGCCAC  
CCGCGCCTCTTCCCCAACTTGTCTGCAGGAACCTGCCGCAAGACCGGCGAACCGAAT  
GGACGCTACAGCCAGGGCTTCGTCAATCAGTTTGCGAAGTATTTGAAGGGCTTAGGC  
TTTGGCAAAGGCATTGGATCGCATGCGTTCCGCCATAACCCTGGCTACCGAGCTCGAC  
GCCAAGGGCGTCCGCGTCGAACACATCGCTTTGATCACAGGCCATGCCCTCAACAA  
GAAGGCGCCCGTTCTGCAGGACAACTATGTCCACAAATCGGCCGGTAACACCCGGA  
AGATCCAAGTGGAGGCGCTTGGCCACTATCAGCCATCTGTGAAGCTGCCGAGCTATG  
TGCGCGGACAGTTCAAGGAGCGATTGAGGAAGGGGGCGAGGATGTATTCATGATCG  
GCTTTGCGGGATCTAGCCATCACTTGTTCTGAGGGGAGGACCATGTGGAAATCTGAA  
GTTTTATCGCTACTCATCGCTTTGCTCGCAGTAGTGCAATCTCTTCAAGGCATGTTCCG  
ATAGACATCATGCAGAATATTTCCCTCCTCAATTCCGTCACGCTGCTGTCCGATTCTG  
CTACAGTCAATGCTGTGGAAATTCAATAAAAGAGAGATGGATCGATGGCTTATGGC  
TACGCACTGATTGTGCGATGATAAAAATGCCTCAATCAATGAGGATACCTGGCAAGAT  
TTGATCAAAGCACCTGACTTCTCTTTCAACACAGTCGCAAAAGTAGTTGTTGAGCAT  
GTGAGAAGCGGTGGCAGCTTCTCAATCATATCCATCGAAGATGTGGTGATGAGGCG  
CTTTGATCGGGTGGCGGAGCTAGAAAGCTTCTTGGCAGAGGCTAAGCTAGGGCGCC  
ATCAGTCCTAGGCTTTGTGCGCTAGCCTTGGCATTGTGCGCTGATAGTTTGCAAGACG  
ACCGGCAACGGTAAACATGGACTCGATATGCCAACCATCCCAGATGTTTCAGATCCG  
CCTGCCTTTCCTGCTGAATGCGCTAACGTTGCATTTGGTGGAAGCGCTCTTGCAAAT  
GGGCCTAAGCCCAGACCACATCGCTGTGATCCTGATTGAGCTTTGCAGGCGCGGTGA  
ATCCAGCGGGCAAGACGCCATGGATCACCCCTCGACTCAGCGCCGCAATTCTCAATG  
CCAAAGCTGCTTCAAAGGCGCTCACTGAGGAAGTAGAAAAGTTCTATCAGAAGCTC  
AACTCGATGTATAGCGTCTCAATCCTCTGGGAAAACGTGGCAAATTGGATAAAAAGA  
AATCGACAGCTCTCTTTCCGAAGAATTTATGATGCGTATCTACGAAGATTTCCGAAA  
CGGCAAAATTACCAACAAAAGCCAGCTTTCGAGTGCTATCGAAGGACTTCGCAACC  
AAGCGGTGGGCCAGCTGTCGCAGCAAAGCTATGGTCAGCGATAAACTTGAAGTGCA  
TTAGGAACACGCTCCCATAGCGAAAATCGCGGTTTCGCCTCCGCCCAACTCAGCAGCC  
CCCTGACTACTCCAACGTTAAGCGGTGAAAGTTCCAACAGCTCGGACACGTCCACCG  
GATAAGACGCCTCGTGACCAAACGTATTGAGGAAAATCCGAGCCATTAGCTGAGAA  
TTCTGCTCGTTAGCTGCGATGTATATAAGATAGTTCGCGGCGTCCATGCTTATGCGTC  
CTCAGCAACAAGGCACACTTCCTCTTTACAGATCCGCACCAGACCAGCTAGCTCTTT  
TGAAGAGAGATCAGGCCGCGGTCTGTCTGCAAGAACATGGGAGATCAAGGACCAAG

CCACGGCAGCCCTGTCATTCCGGAGCCTGCCTAGCTCCCGAAGGTCCACTGGATATC  
GCCGTCGATCAAAGCAAAGATTTAGCGCTAGACGCGCCATCAATCGCTTCTGTTGCC  
AATCTTCCTGGATCGTGTTGACATACTGCACATAGTCACTCGGAAACATACGCCCTC  
CCAAGTCCACCCTAAGGCAAGACGGAATTTCTGTCAATGGCTTCTTGCGGCTTGACGC  
GACGCTTCCAGTTCAATCTTCCTCAGCGTTCACGAACAATACGGCGACAGTTGGTGC  
ACCGCTGTGCCAGCTGATCTCAGCTACTCATCGATGTTGACCTTAAAGATGTATCTC  
ATGCAGTCGATATCGATCCAGTGAGGTCGTGCAAGGAAACGCACGTCATGGTCTCG  
CGCTCTTCAAGCATCGTTAGGGAAGGTCTGAACAACGAGGCCTGAGGGTGCGGGAT  
GTCGCGTCGTTCCGAAGAGTGGCGTTCGGATCTTCGGAATTTCGCCATTTCTGGCGC  
TTTCCGTGGGAATTCCCCGGGATACAGGCGCAGGCTCCCCATAGCAGGCAGTAACT  
GCTTTCGCTTCATCCACAGGTTTCGATAGCGCAAACAAGGTCAGCACCTGCGCGGTGT  
TCTTGGCCAGGCCGCGATAGCGGACATTGGTTTAGCCGAACTGGCGCTTGGTCACCC  
GGAATGGATGCTCCACCTTGGCGCGCACGCTGGCCTTGAAGTGTTCCCAACCCTGTT  
CC

>CONTIG\_153\_length\_3167\_cov\_71.213487

GCGCAGCAAAGAGCAGGAGGCCGAACCGGCTCAGGAGAAGGCGGCGCCGGGGCCG  
GTGCTGGCCGACAATCCTGCGCACCTTGACCACTCGACCTACCAACAGATCCATTCC  
TGGGTGCGTGGCACGGGCAACTGGAACGTCGAAGAGAGCAAGAACGTCACTGCCTC  
GCTCTACAAGCAGCAGACCGAAGACCCGTTGCTGCAGCGGGTCGACAAGGTCACGG  
GCGGGCTGGGCAAAGACGGGGCGGAGAACGTCTTTGCGGTCTATGCGCCCTTTGGG  
GACAAAGGACCCTTTTTTCCATGCCCATGTCGACGGGCGCGAGGCCTCGCAGGAGCC  
GGCGGAGCAGAACCTGCAGCAAGCTGAGGTCATCAAGCAAGATCAGGTGCGCCAAC  
AGGCGCTGGAACAAACCCAGCAGCAGACAGCTCAGCAGGAACAGGGGGCCAGAAT  
TACGATGTAGAAACGGAATGCTCGCGCGGTTTCCATCCGATGATGAGTTAAAGGTT  
AACATGTTTGAGACTAGGCAAAAACCTGCGGGGGGCACCTGCTGGTATCAGGGGGGC  
ACCGCAGAAGAGGAAAAGCCACACCCTTGAAGTTGCGATAGCCATAAGGTGTGGC  
GACTCCGAGGAGCTTAGGTAGTCACATGCAGTCCGCTCTTTGCCCTAGCCAGCCGGG  
CATGGTTAGCCAAGTGCTCCGGATTAGGATGCAATGAGTGCGTGCTAGGGAGACGC  
AGAAAATTTCCGTCTAAATCTTCGTAGTCGGTTCCTATCAGAGAGGGAGCTACTGCA  
ATGTGGAGCTCTGGGGTGACCCAAATAAGTCCAAGATCAAACAACGTGTGGATGTC  
TGCGCGTAAAAGCATTCCGTTGTCTACCCGGTTCGTATGATCTCCTCTGTAAGGGCA  
AATGTGAGCAGCCTCTAGCACTGCTATCGCGTTGCTTCCAGTGATGGCGCAGCGTCG  
CTCGTAGGCCTCAAGTAGCTGATGCCTGAAGGTGGATTGGCCCCGCCGTTGGGCCAC  
TACCGTAAGAGCCCACACGCGCGCGTCATAATCCGAGTCAAGAGGCGGTAGGTGTT  
CAAATGCATGGCCCAATGCCTCAGTCTCGGCCAAGACGATTTCTGCTCTCTGGAAGCT  
GTAAGTCTTCCCAGTCGCCTACGCCGTTCTCTGCAAATCCCAGTGCCCATGGATTTC  
TGGCCTGAAGACCTGATATGTGACGCTGCGACGCTTTCTTGGCGGAACAGCCGGTC  
TCTCGGATGCCCGGAGTCAGAGCGCCAGTTCTTTCTTGATCTATCGAAATGCCGCCT  
ATTGGCATCGTTAACCGTCAAAAAAGACAGATTAGCGCCCAAGTCTGAGTGGTCTTC

TTCGCTATGGCTTTGGCTCAGCCAATGTTTGATTTGAGCAAGAGAAGAGGGGCTCTTG  
GAACGCCGCCACGGCCTCAGCAACATGCCAATACTTCGCCGAGACTTTTCGCCGACG  
TTCGTCTTCGCCAATGGGTGGCTGGCCGGTATGCTCGAAGGTTAGCTTAAATCCGTC  
AGCTTCGAGCGTCTCAACCCGCCCCGACTAACGTGAAGTCGGGTTCGAAATCGTTTGT  
TAAACGTGTGGCGTTTCCCAACTCGACCTCTCGTGGGTCATCGGATGATGCCACAAC  
GACGCGAATGGGGATGTTCTGCTCAAATGACAGCCGTAGGTGCTTTAGAAACGTGT  
GCTTTCCGGCACCTTTCCAGTAAGTCGTTCCACTCTCATAGCTCAACCTTCCTGGCGA  
GAAGTCATGTTCCCAGAGGGCTGACTATCACTTGCCTTGGCTCTTCTGAGATTGCCGA  
ATAGGTGAACTGCGGATTGAGCAGCTCTACTCCGTATTGGCGGAAAGCTTGAGTGAT  
GCGCATGCGATTCCCTTTTCTAAAGGCACCAAGCCACTGGTGGTTACACCAAGATCG  
GTTTGGCTTTCTGCACTAAGTTTGAGTGGATGCCCGGTCATAATAGCGACGTCGGCG  
CAGGGACTACCATGGCGCGTGCTTTGAGATTCAACGAGCGCGGATGCCATTTGTTCT  
TTGCAATTTTLAGACTCACCTCGTTAGGTAAGTGTGCGGCGAGGGTGGCGGCGTAA  
TCCTATGCCGTCTTTGGTTGCACACCACGTGCGCAGCAACGACGTTCTCTGGTGTGTC  
ACTTCCTCCATCTTGCTTTGCGAGCAGATGCTCCGCCGAGCATTGGAACGGCCGCGC  
AGAGCGTGGGCACAAGCCCAGTTCGTCTGGCGAGGAGAGCCACATCGGAAAAGCGC  
AGTAGAAGCACCGGCCATTCTGTGCATGGAAGGCAAGGGTGCGAAGGGTTTTAAGG  
CGTTTATTGCTCATGGGAAGCTCCGGAATCGAAAGGATTCCCGTGCCCCCATTGGGT  
GGACCTCGGGCACCCGGAGCCGTTTGGCATGCGGGCACAACACCGGGGGGATGCCCC  
ACTGGCAGACATGTTGTAGCTCAACTTTGGGACTGTCGCAACTATGCGGCGTGCTCG  
CATAGGAAGAGCTGGCGACTACGCTCAGTGCGTTCTTGGGCTTTCGTGAGCTCCGGT  
GATCGCCATCCGCAAGGCGCCGAGTGAGATCGCTTGGTTACGGATCCCGGCGTTCGCT  
CCGATTTCCACGTGCGCCAAAAGCGCACCCACCAACTCGGCATCCTCCAGCGATTCT  
TGCTCCTGCAAGGAACACGAGCTCTGCTACCCGCGTGCGCCGCTTGGCCTCTTCGCG  
GCTCTGAGTTTCTTGGCTTTCGCCGCTTGGCGCTGCTGCGCTAAAAGCTCACGCGCT  
TGGAAGTGAAGCAATCGTTCTGTGGCTCTCTGGATTCTCTGGTGGTAACGGGTGGC  
TCGGTCATGCTTTTCTCCTCTGGGTGCTTACGAGTCAACCAAAGAAATGGCTCGCGT  
CAAGTTCGCGCCGGTTTGAAAACCTTGGGCTCCCTCGAAATCGAAAAAATCTGGAAA  
ACAAGCTTAAAAGAAAGAAGCAAGAGCGCACCTAGGCATCACAAGTGATGCGTGCG  
CAAAGGGCTTCGCCCTTGAACCCCAAGTGCCCAAGGCGCTTGCGAAAATCCAAAG  
CCGAGGCATAAACCAAGCAACCCCACTGTTTCGGAGTCGCCGCCTCATGGCCATCTA  
CCACGCCAACGTCAAAACCTTCAGTCGCGCCAAAGGACATTTCGTCCATC

>CONTIG\_154\_length\_3166\_cov\_5.517275

GTCTATAGGGGCATGTTATGAATTGTGTCCGCATCGACTACAGCAGCTACTTGGGCT  
TCGATTTCGGAAGTCCCGACGGCAGCGTTTCCAAGCGGGGGTGGCGGGGGAACTCCC  
GCCGAAAACCTGGGCGGCTTCTGCCGCCCGCTATGGTTGTTTCGTGCTCCCCACCTGC  
TGACGTAGTTGTTGCGCGGCCGACGGCACATGTCCGCACGGACCAATGCTCGCTCCA  
TGATGACTGCTTTTGGCCGGAAGCGGACATGGATAGCCGCGTCCCGCCAGCGCAGG  
GTCACGTGATGCTTATGAGGTTAGGAGAACATGCTCGATTACGTCCATTTCAAGAAG

TTCAAGAATTTCAAGGACCGGAGAATTGACTTCTCAGAGGGCGTAAGCCTTGTGGCT  
GGTGGCAATAACTCCGGGAAAACGACTGTTTTTCACGGGTGGCCGTTTGGGAGTTC  
TGCAGGGCAGTTGTGGAAGCGGAAAAGGGCTCGCTCGCCCTCACGCCAGGTCAGAA  
GTTTCAAGGTGTCGGCATTAGCGAGCATGAGTTCCTTCCTCTAAACCTGCCTGACCT  
GAGCCATCTTTGGACCAACCTGAAGCCACAGAAGACCGGTGGTGAGAACAAACGGCT  
ACACGCTGCGAATCAAGTGTGGTTGGAACTCGATGGAGTAAACAAACATCTTGAG  
TTCGGCCTAGCGCTGGCTAATGACCGTCTGTTTCGTCAAGACAACCGACACGAACCTT  
CTTGCGGGTGACAAGGTTCCGCGCGTCGCGTACTTGCCGCCATTCGCGGGAATCTCT  
TCAAGAGAGGGTCGTCTTCCCCACGCACTTCGTTCGACGAAGGGTCGGTGAAGGGCT  
CGCGGGGTCAGTGATCAGGAACTCGCTCCTGGATATGAATGTGCGGAATGGCGAAG  
AGCGCAAGCGCCTTCGCGGAGCGCGCTCTAAGTTGTCTGAGTCTGACTTGAGGACTC  
TGCCTGAAACGGACCCATGGGAGTTGGTGCAGCAGTCATTGCGCCAAGTCTTCGGG  
GCTGAGTTGTTGGTCTCCCCATTCAACGAGGAGTACCACTCCTACATTGATGTAAAG  
ATCGTTAAGGGCGATGTGACTGGGTACAAGCTGACTCGCTTCCCCGAATATAAGGCC  
CGCGACCTGATGGTTGAGGGTAGCGGGCTGCTGCAATGGCTCAGCGTCTTCTCCTTG  
GCGGTTGACCCGTCAGTTGACGTCCTCCTTCTCGACGAGCCGGACGCCCATTTCAC  
CCAACCCTTCAGCAAGAAATGTTTCGAAAGGGTTCGCAGCATCTGCGAAGAAAAGCT  
AGTCTTGGTCGCCACTCATTGCGCCGGAAGTGCTCCGCTGGGCGCCCTTCGAACAGAT  
CCTCGCCTTTTCGAAAGGGGCATTTCGCCTAAATACCTCGCAGATGAGGAGGGGAAGG  
TCGGTTTGGTGGCTGGTATAGGTAGTACCTACCTGCCCCGGCTTGATGCAGCGCGGC  
GATCGCGCAAGATCTTCTTTGTAGAGGGTGACGGTGACGCAGCAGTTCTGAAGCGC  
GCAGCGGAACCTGTCGGGTCTAGCTTGGGACGAAGATTGGGTGATCTGGCCCCGAGAA  
GAGCCCTCACGCCGACAGGGTCCGCCTGGCAAAGATGATTGGTCGTGAGATCACAG  
GATTGAAGACGATAAGCTTGCGAGATCGAGACATGCTCTCGGCGAATGCTGTGCGC  
GACGATCTGATTGAGCGTGGACTGGCGAGTGATCCCGCCTGCGTTCCGGTTACCTGG  
AAGAGGCGAAACATAGAGTCCTACCTGATATGGCCCCCTGCGATTGTGCGAGCAAC  
TGGGAAGTCGGCACTCCAGGTCGAGGATGCGCTAAAGAATGTTTTCGGAATTGCCAT  
AGGGGCCAACTTCCGTGATCACTTGGCGCCGCAAACCATCTTGGATATAGATGGAA  
AGGGCATCCTTAAGCACTTTGGATTGGTCTGGCACGACATGCTTGAGCACATGGACC  
ACGGTTGGCTTCCTGTTGACTTGGTCAAAGCGCTTGACCATCTCGGAATGGGTGAGG  
TCTAGTGAGAGGGCGGCTTGAGTCGGCTCCGCTTCCAGGCGAGTCAGCCAAGCTTCT  
TCGCCAAGTCCTCGGCTTTGGGGTGGTAGTAGCGCTTGAGCATCCTCAGGTCCCTGT  
GCCAGTGACAGATGAAAGCTCAATGAGGTTGGGCAGCTTTTCTGCGAGCCGTGAT  
GCAGCTTCGTGGCGAAGGTCGTGGAAGTGCACATCCTCTAGGAACTTCGGAGATGG  
ACTGCGCTTAGCTTCCTCGCAGTCTTTGAAGTAACTTGCACGGGCCTTCTTCAATGCT  
CGCGAAAAGCCTTGCTTGATCGCCTCTGGGGTAGTCGGGAACACTGGCCCAGCGAG  
GTTTCGGGGAAGCTCCTTGAGGATCTTCAGAGCCTCTTTCGATAGCGGCACGTCACG  
GGGATCACCGTTCTTTGTATTAGGAAGGTGTGCAACTTGCCGCTTGAGGTGACATG  
CTCCCAGGCAAGCGAAAGCAGCTCGCCCCGTCGCATGGCGGTCTCGATAGCCAGGC  
GGACTAGGGGAGCAAGCCAGGGATTCTTGCGCATGCCTTTGCCGTAGCTGTTCCCTT

GCGGCCGCTCAGTGGCTTGGAGCGCAGCGAGCAGGTAGTGCTCTTCATTGGTACTCA  
AGCGTCGCTCCCGTGCCCGCGGCAGCGTAGGGCGTTTCACGTAGCGGATAGGGTTCT  
CGATGTGGATGCCCCATTCACGGCGCGCATGATTTAGGACTGCTGACAAGATGCCGA  
GCTCGCGCAGGATCGAAGCCGGCCCAACTCTCTTGGATCTGCGATCGCGCCATTCTG  
CGAGCGCTGCGCTTGTGATCGCGGACATTTTCAGGAATGGGAGAACCGGGTCTTCGA  
GGAAGATGCCGATCTTCACGGCTTCCATTGCCATGCTCTTCTTTGTCGGGGTGACTTC  
CCGCGCGTAGCGCTTCAAAACAGTCGCAAAGGTGGTCTTCTCGGCCTCGCGCCGATC  
AACAAAGCCAGATGTCTGTAGCTCCCTCTCCGTTGCTTGGACCCACTTTTCAGCGTC  
GGCTTTGTAGTCGAATGTCCGGGACATCGACGGATATCCCTTGACCCGGACCTTCGC  
CTGCCATTGCTTATCACCACGCTTGGAATGGTCCCCACGTCGTTGTCC

>CONTIG\_155\_length\_3085\_cov\_46.120352

GTGCTGTCACGCTTGAACCAGCGTGTGAGTGCCTGGCCGGTGTCCATCACGCCCAGG  
AACCCTGCATAGTGAATCAGCTCTTTGTAGCGGTTCTGGGCTCGGCGTGCGGGTGGCG  
ACGAACCGGTACCGGACTTCATCGAACAGGGTCAGGAACTGCTGGTAGGTTTTCGAT  
CCGAAGCTGCGCAGCACTGACGCTTCGTCCAGGCTCGCGGCGCTGAAGAGGTTGGG  
ATCGAGCTTGCCGTCTCGCACGCTCTCGTAATTCGTCAGGTGTATGCCGTCTGAAGTC  
CGGATCCACCTCGGCGCTCGTGCGCACGAAGCGAGTCTCCAGGCCAAGCTTCCCGG  
CGTCGCGGCGGAACTCCTGCCGCACGCCCAGCGGCACCACAATGCCAACCGCGCCG  
CCGGCATGCGCGCGCGCCAATCGCATGATCTCCAGCTGCTGCATGCTCTTCCCGAGG  
CCGAAACGCTGGAAAAGGGCGCGGCGCCCGCCGGAGCATGCCACACGACGCTGTC  
GCGCTGGTGC GGCTTCAGCATCGGATGCACGTCGTCGGGGGAGATGTCGAATCCCA  
GCGACGGCGCGACGCGGACCTTGCGCTCGAGGAAATCGCGATAGGGATCAGTCATG  
CTGCGCGCTCCTGCTGGGCCCACGTGTGCGCACGCTGGATGCTCGTACCGATCCAGC  
GGATCACCGGCACAGCAAAGCTGTTGCCAGCATCTTGTAGCGAGGACCATCAGCC  
ATCGGCTTGCCCTGCGGCGTTCGGCACCAAGGTCCAGTCGTCGGTGGCACCCCTGCAGC  
CGCTCGCACTCGCGCGGCGTGAGTCGGCGGACCTGCAGCCCTACCAATGCACCGTTG  
CGCCGGCGCGGGGCCATTGTTGGCGTCCAGGGTTGCATGCACTTGGTTCGATGCGGACG  
CCGATTGCGATGACTGAAACGCGACAGCTACCTGGCCGCCTGCGTTCGCATGGCTG  
TTGGCATGCCCCATCGCACGCAGCGTTGGTGCAACATCGTCGGACACGCTGCGCGCC  
GGGTGCTGTCTTTGCAGCCGAATGCTGTGACCGGGATCAGCGGCGTGCCGCGGCC  
AGTACCATCTTCGCTGGCATCAAAGCCTTCGGCGCGAAGCGTATGCGCTACCGCTTG  
CACGAGGAACGTTTCGCTCTCAAAGTCCAGGCGTCCGCTGGCGCTGGCGCAAGCATT  
CAAGCAGGTTCCAACCTCAATCGGCCCCGACGTGTTGTTGCCGCCAAAAGCCGTCAG  
TGGGATGTCGTCTGTGCTGTAGCCGCCACGCTGGCGAGCGCCGCCCGCAAGGCTTCC  
GGCAGGGCTTTGCCCTTTTCCCGGCTCGGCGCAGAATCCCCGCGCAGGCTGTCGCG  
CTCAAGAAGTACCGGGGGTTCGACCGGCCCAATCTCCAGTATCGAGGACAGCGAACA  
CGCGACGGCGCCGCTGCGCCACTCCGAACCACTGCGCGTCAAGCACGGACCACTCG  
ACGAGGCCGTTGTGCGCCAGCGCCACGCCTTCGTTGCTCCAGCCGTCGGCGGGGACA  
TCGAGTTCGGATCCTGCCAGTGCGCCAACCACAACAGCAAAGTCTCGGCCCTTGTTG

CTGCTGAAGGCGCCGGGGACGTTCTCCCAGACGAGCCAACGGGCGCCGCAAAGATG  
TCGAGCTGCATTGAAGATCCTAAGTTGATGGTGGAACAGGCCGGAGCGGGCGCCGC  
CCAAGCCCGCACGCTTGCCAGCCACGGAAAGGTCTTGGCACGGACTGCCGCCGATC  
ACGACATCAAGCCAGCCCAGGGCCCGGACATCTTCAGCAGTCGCTTGCGAGACATC  
GCCCAGATTTGGCAGCGTCCCAGGCGTCCCATAGAGAGGCAGGTGCGATACCAACT  
TGATGGCATTGGCGCGCGCGCTCCGCTGATCCTCACTCAGGTCATCTGCCATCGGAT  
CCGGCATGTACTTGGGCCGGCTGGCATTCAATCGGCTGGCGAGCAAGCAGCACGCA  
GCCGGATCGATCTCGGCGACACCCTTGACGCGCCAGCCGAGCGGCGACCACGCGAG  
GTGCGCGGCCTCCATTCCCGAGAAGAGCGACAGGTAGTTTCATCCGCCCCGAGCCTCC  
CGCTGCGCTTCGTCGCGCAGTTCCTGCAGGGCGGGCACGTGCGTCAGCCGCACCAG  
ATCGTCGGTCTTGCCGGCATCGCGTGCGCGTGCCAGCGCCCATTCCAAAGCGGCGAG  
GCGGTCGTTTCGGATGCATGGTCATGCTTCGATCCTTTTGAAGGAGATAACCCATACC  
CATGGGTTGGCGTCCCAGTCGCCGCCGGTGCTGGTCCAGATATCTCGGAAAGCTTGG  
TCAGGCCGTGCATCGCCGTGCCCGTATGGCCCGTAGTAGGTGATGCCGTCTCGTCG  
TGCCGTTTCGATTCCCTCGGCAATCGCATCGGCCTCGCTGATCGCCTGCAGTCGTTTCG  
ACGCGCACGTGGTGATCTCCAGCAGCAGGCGACAGGCGCTGCGCGGCATGTGGAT  
GCTTGGGCGCCACTTGAGGCCGAAATCCTTGCGCGCCTCGTCGCTGGCGCTGCCTCT  
GGGGCTTTCGGAACCGTAGGCGTAACGAGTTTGCTTGCCGGTCTCCATGTCGCGGGT  
CTCAATGCTTGTGCCCATGAGGTCCATCCACGTCTCCCGCACCCACAGCCGGTCGCC  
GGGCTGGCCGAATGGGCAGGGGAACGGGTTGGTTACACCCACGCCGGCATCGCCGG  
GGAGATGGCAGCCAATGAAAGATCCACTGGGCCGCTGATACACGCTCTTTACGCCA  
GTGGCGTCAGCCAGTTGTTTCACCGCGCGACGCGTCTGCGTCTTCGCACCGGCCAGG  
ATGGCGCGCACCATGGCGCCGTTGAACAGAATCGGTCGCTCTTTCATGCGGTAACTC  
CCATGGCGGCCAAGTCGATCTCGTCCACGCGGTCGCGCAGCTTCCGGCGCGCGTTGC  
GCAGGCGCTGCGCGATATAGGCGCGCGGTTCCGGTGATAGGTGAATTGCAGCGAGGAC  
ATGTGCAGCGCGCCGCGGTGATCGCGGCGGAACAGCTGCCACGTCACGACGGTGCC  
GTTGTCGTTGGGCGTGCGGCCCCAGCACAG

>CONTIG\_156\_length\_3067\_cov\_374.070408

AGGCGATGCGAATACTGACGATGTTTGTAGACCTCGCTCAGAAAGCATGCCTCGTCT  
AGATGGTTAAGGGGGAGAGTCGTTGCGGATCCATTGTGATAGACCATGTAGTGCAC  
CCAGCTGATCTCTTCAACGAGTGCGTTGATATGCCCTTTCGACAAAGATACAAGTCG  
TGTTGCTGCTGTGAGTGTATCCGGGTCTTTGTCAAAAATCTTATATGAAGGCATCCC  
AGCCTTTGCCATTAAACGGCAAGTAAAAGCCAACAACATGGTGAATTGGTAATGGC  
CATTCGATGATTTTCGCCGGTCCCCTTCGCACGGATAAAAGGTGCTCATCTTCTGCAG  
GGTCTAGTTTCTTGGCCTGAAAAATGGCAACTTTTGCGCACTCGTCATCATGGCCAA  
TGACGAGGCAAAAATCGGCCCTGTAGCGGTTTCGCTCAATGGCGTCTGGGCCCCGC  
CGTTCTTCCGAAATGTTCCAAACCGAAAATCCGCGTTGGTGCCCGAGGTTTGACCTT  
CAAAGGCAGCGAGCAATGGGGCCGCTATGGCTGTTCCGCCTAGGATGGTAGAGGTG  
TAGCTCTCCTCGTCATAGTCTTGGACGCCTGCAATAGTCTTGGTGCGCTGCATTGTCC

AAAGGAGCGCCAAGTGCATGGGGTCGGTTGGCGTCGTTTTAGAAAGAGATGTCATCG  
CTCGGCCCCATCGGGAGACCTCAATCTGAAAGCGCGAACATAGCATTATCGCGTCCC  
AGGAGCGAATCACCAGCTACGCTACAAGCTCTCTCGATAGATGCGCAAAGCGTCGG  
GGTAACGACGACCAATCGCTTGCAGAAGCTTCCCACCACCGAAAACGGCGCCCTCA  
CCTTCATCTTGAAAGCATCGGAGCAAGCGATCAGACCAGTCAGATGGGATGCATTCT  
GTCGTTATGATTGGACCGGCTAAAAGTGAGCTTAGAACGCAACCGCCTTTCTTCCCG  
GCAAGACCTTCGTAGCTTTGTAGCGCGTCAAGCAATGAAACTTGAGTTGCAAGATCC  
GCATCCATGAAGACATCCATGAAGCGTGATCTCTTCCGCTCGTTTTTCGAGCGCAAAC  
GCGATATACCAAGTCCACTCGGCCCAGAAGTGTCTTAAGGTCTCAAATCGAGCAGA  
CTCGCTTCCCGCTCGCGATGCACGCCAGCTGGTGTCTCCTTCAAGAACGACCCCGTC  
GCCAGCGCGGGTCAGACTCATGCCAAACGGCTCGATGGCATCATTGGCGTCTTGCA  
AGCTTGGA AAAAACATTT CAGGCCTCCGATGGGTATGCTTTGGTAGGCCAAAAATCA  
GACTTGTCAAGCGTGTTTAGCCTTTCCACGGCTCCCAAACCTCGTGAGCGCATGGGCA  
GCAGGAGGAGGGTTAGGGTGTAGTCGAACTGGTCGGCAGTGATCTTCATCTCTTTGA  
GACTAAGTCCATCCTCGGCATGCTCGAACCATGCATTGGCCGGAAGCTCCATACCTA  
ATCGCTCGTGGATGATTTGATCGTTGGCCGCTAGAGTTTGAGGGCCAACTGCAACCA  
CGCTTCTGCGCGGCCGAAAAAAGGCGCCACCGGCTCTAGCTGACTTGCTCGACACC  
GACCAATTGATGAAGCCATCGGTGTGTGAGATGAGCACGGCGCACTGGTCAGTGTG  
GTCGATCCAGCGCAATGCAGCAGCAGTCAGTGATACGCCATATCGATCGGCGCACT  
GAGCGAGCACCTCAAAGTCGGCGCCACCTTGGGTTTTCTCGCGGAAGTCATCCAGCG  
GCATGAGCAATGTGCGAGCAAAGGCGTTGGCCTGGGCTTCCATCGACGCCTCTTGCT  
CCGTCAGGCTCACCATGTCTTGCGTGGCGCACTGAAAGCCGTCGATGCGGTCTTGTC  
GATGCAGCAGGTAGTGGCCAAGCTCGTGAGCTTGCGTGAATCGGATGCGACCAGCG  
GATTTCAATGTCTGGTTGTAAAGCAGCATCCACTTGCTGCGCGTGTCAATTAGGGAAA  
AGTGCGCCTTCAAACGATTTGATGTGCGCCGATTTCGACATTGGTGATGGGGTCATCC  
CAGCGGAAGATCTCTGCTGCCTCTTTGGCCAGAGCAACGACGTCAACTGGAAAGCG  
GGGGGCCCCATGCGCCGCTGACACCGCATTGAGCAAATGCGTTAGCCGGAAGGCTG  
CCTTGAGGGTGTAAGCAAATCCTTTGTCATCGGCCGATCCTTAGCAAGCTAAGACT  
TCTTGAAGGTTTCCATGATCTTGCGCATCTGCTCTTTGGCTGTAGCGTCAAGCTCTCC  
GTAGTTCCTAAAGAAGGCCAGGTCCAGGTGCCGCTCTTCAGGGCTAGTCGCCTCTTG  
GTCCAGGAAGTAGGACACATCCATCGAAAGCGCCTTGGCGAGTGACGCGAGCTTCT  
CAACCGATGGGCGAGGGGAGTCTCGGTTCTCCAGCTCCCACAAGTAGCTCTTGCTCA  
TGTCAGCCGCTGCCGCTAGTGCGTCAAGCGTCATTCCCCTGTCTTTTCTTAAGTTCTT  
GATTTTATTGCCAAAATTCGTTGTTCATCGACTATTCCCTCATCGGCCGGCACAGCGCC  
AGATGCCACTATACCGAACAAAAAGTTTGACGACAGCGAAATTTCTAGGCAAGATG  
ACCAAAATCCGCTGCACCGAACAAAAAGTAATGCTAAAAAGACGTGACGCATAGCA  
CATATGCCCTGGGGCTATGCTAGAGTCCAACGCAAAAGGGCCCGACCATTTGGTCGA  
GCCCCAGATATTTGGAGTCACTGAAATTGCAACACAACATGTAGTGGTCGTAGGG  
ACCACCGCTGCAAAACAAACCTCACACGCATGGCGTCAGTCGGTGGGGTCTTTGAG  
ATTGGCTGCCTCGCAAACAGCCGAAAAAGTATAGCGCCCTCGCAAGGGGTGTCAAT

ACACCAGTCTCGAAGTTGTCTGGATGAGCGCCCTCAACCAAGAGGATTTACGGCCGT  
GTCAACAACGACCGCTACCCCTCGTCCTGGCTACAAGCTCATCTTCAGAGCAGTCAT  
TACTTTGAAGAATGGCAAGAAGCTCCACGCTTCTGCTGCAGGCTTGAAAGCTTGGCC  
GATCTGGG

>CONTIG\_157\_length\_3024\_cov\_30.668278

TTTTCATGTGCTCAGCGACAAGCTTTGAAAGCGCCAGTGCTGCTTCTCGCCCACCTG  
CCCCTCTCACTTCTGCTGTGAACTTCGTTTTGCGCATCACCGCGACTTTGGCTTTGCC  
CAAGTGCTTGCCGGGCTGGCGCGTGAGTTCGCGGGCGCGTTCAAACCTCTCCATTACG  
CGCGGCTTCGTATGCTTGTGCTCGGAGACTGCGATGATCTACCCGAGTCGAGTAGTC  
CGCATTTTTCAAGTGCGCATTGATGACCATTGCAATGTCTCTGCGGATTTGCCGCAG  
CGCTCGTGTGCCGCCGCCTTGTGCGCGCATCAAACCTCAGCGCAGGCGCGCTCCCCTAG  
TCCTCCCGGTCCGACTTGTGCGCGCTGACATCAGCAAATGCACATGATGATTGCGCTG  
ATCACCATATTTGCTTGGTGTGTGCACAGCGACCAATACGGCGACGTTGAACCGATT  
GACGAGCAATTGACCCAGTGCTAGAGCGAGCGCTCTCCGTTGGTGTGGATCGAGTTG  
GTGCGGAAGCGACACCTCGACTTCTCGGCAAACGCGTGCGTTCTTGCGCGTCTCGGC  
CGCTTCGTTTCGCGTTCCAAAAATACTGTGCATCAAAGCACCACTCGGGCGCTCCTTT  
CGGCGCAAGCATCTGATGGAAATCGACACCGCCTCGGTGGGAATAATTGTGGCCAA  
GCCCTGTGCTCATATCGAGCAGATCAAACCCTGCGCGGTAAGCAGCTGCTGCGACC  
GAAGAGTCGCCGTTGCCTCGGCTGAAAGACTTCATTGTTGCGTGATAAATCGCCATT  
TGTGAAACTCCTGTTTGTGGAGCACACAAAGAAGCGGCAGAACATCTGCCCGTCGA  
GAGAAAAGCGAACTCGACAGCACAGAGACCTCGGTCACGAGGTTTTGAAGTGGCTG  
TGTTGCCTAGCGAAGCATAGGCAACGAGGTGGCGAAAGCCACCGCACCGACGCGCA  
GCGTTGGCGCACGGTTTCTGCAAAGCAGAAACCATAAGTGCGCTCTTGCTTGTTGTT  
TGAAATAAGCTGTCCGCGCCAAGAAATTCGATTTTCGCGAGCCCTCCATCGATATAC  
CTGAAAGGGCATATTTAAATGTTAATGAAACCTGTACAAAGCCAATTCATAAACCCG  
CGACTGTCCGTCAGCATCGCGTCCAACGACTCTCTTCTTAGCTCTCATATATCTCTTA  
GGACATAAAGAAAGATCAGGGCATTCTGCTTGCAAACCTCGGCAATCCTGCGACGAA  
GGCAATCTTTGCCTCAACCGCCCCCATCACCAACCGCCTCCATCGCCGCCAGACA  
TCGCCTGCTGCTGAGAGTGGGCAGCAAGCGTCATGACGGGGCCTGTTGGGTTCTTGT  
CGATCTCTTCGCGCTCCCGCTGGAACCTGCACCATCTCCTGCGCCCCGTTGCTGATCCAT  
TGCCGCTGTCTTCTGCAAGGTTTCATTGATGCCAGGCGATGGCGTGTTGAGCGAGGT  
TGCCGAGTGAAAGCCGGGCGTTTTTGCCAAAGACAAAGGCGACATCATCTTGATGA  
TCACTTTGCGGAGTTCAGCCGCACGTTTCGATCCCTGACTCTTTGACGGCATGCAATA  
CCTCGGCCGTCTTCTCATCGGATGTGCCCCTGGGGAGCTGCGCCTGGATGGCAGAAA  
ACAACGCGTAATCTCGATGATCAGAGGGAAACGCCTGCTGAGCGGCATCTTTGAGG  
GGCCTTGCTTGCTCAACCCGATCCTCATCGTGTTCTGTGTGCGTTAGAGCGGGCAGTT  
GTCCCACCAAAACCTGGCGACGACGCATAGGCAGCGGGTTGGCGCTCCGGCAATAC  
GATCTGCGCCGGCACTTCGCTTTGCGTTGGAATTGCCGGCGACGGCGCTCGCACCGC  
CTCTTGCTGCTCTGCCTGCAATGGAACAGCCGATGGCGCATCGTTCTGTGGCATGCC

TACTCGGGCTTGCTGCTCACCGCCCTGCTCCATCGCTGCATTGGCCGATGATGGCTCT  
ATGGGTTTCAGAGCTTCTCGGCGCGCGTGTGTGCCTGCGCCAGCGCTGCATCCAGG  
TCTTGGCCGGCAACGCCTGTTGCCGGCAAACCTTGGTCTTGCTGGAAGTGCCTTACA  
GCATGCTCTGTCTCCGGACCATAGTGCCCGTCTTGCGGCACGGCCTGACCGTTTGA  
CCACGGGCATCCACTTGCTGCAAGCGATACTGCAAGAACTCGACCTCCTGCCCTCGG  
TCGCCGAGGCGCAGCCCTTCCACCTCACTTGATGCCGGCGGGCTGCGTCGGCACAGTA  
GCCTGAGTAGGCGCTTGATCGGCAGAGGTGCAAGCGGATGATGCGGGCCCGGCACT  
CGGCGCAGACGCGCTCGCCGCCGTTGGAACCCATGCCTCCGCCTTAGGCTGGACTGC  
GCCGGCTGTCGGGGGTGCGGCAACCTCAGGTGTTTCGGGTTTCTTGGGGTTTCGCGTTG  
CGCGACAGGTTTCGGGCTTCGGTTCGGCAGGCTTGGCGACCGGGCGCACGTCTTCGG  
GCGGCGGCGCGCTGACGGATGCAGGCATCACGACCGGAGCAGGCGTTACCGTCTCC  
GCAACGGCAGGCGCGTCGGGTGTGCGTGCAACGTCTCGATCCCGCTGCGCATCAAT  
GGCTGCCTGAGGCGCTTGGGTTTCATCCACATGCGGAGCGGTGACCGTCGTTGCGGC  
GAAGCCTGCGACCTGTTGCGCTTCTTGCGTGACACACCTTGCCGATTGGCCTCGCG  
CAACGCTTGCTCGTAAGCATCGCGTTCTTGTGGCGATTGCGCATCAATGCGCAGGTC  
TGGTGCACCGGCCGAAGGGGGCTGCTCCTGCCGAAGTGAAGTGCACCTCGCCGAGTG  
CCTGATGGATGTCGGCGGTGCTGGTGGTTGCTGCGACGCGCACCAAGACCATCAGCA  
CCACGGCTCAGATGCTGGATGGGGCTGTCCACCGAATATTGGCCGGTCGCATCACGC  
TCCAACGCCAAAGAGCTGGTTCGCGGCATCAATCCCGTTTGCCTCACGGGTTTTTTC  
ACCGCAAGCTGGAT

>CONTIG\_158\_length\_2952\_cov\_6.646726

CAGGTTGGTCATGCTGACATTGCCGCGCTGCGCCGGCAGGCAGTGTTTCGATCAGAGA  
AAATTGTGCTGGCGTGATCTCCATGCTCAATAGTTTAATCGCTCGGGCCATTAGTGTT  
AACAGGCCCTAGGAAGTGCGGTCCGCAACTGCTGATTTCGTTCTCAGGCGATCGGCA  
ATGGAAGCTAGTTCTCCCGCAAGGCGCTCCGACGCTTGGGCAAGGGCGTCAAGGCG  
ACCTATCTCGAGCTCGAGCTGTATGGCACGGCGCAAGGCAGCCTTCTCCTGCTGTGC  
GCTGGAGCCGAGATCTTCCTTGAGCGAGGTGAGGCGGTCTCGCTTTCTGTCTAAATC  
CTGTGCAAAGCTTCTGACAGATACTTCGGATTCTGTGAGGCCTTCTTCGAGAGCTGA  
AACTTGGCGGCTAAGCATGCGACGCTGGCTTTCCAGATAGCCGATGTTGCTCTCCAA  
GTCCATCTGGCTGCCTGAAATCCGCTCCACGACGAGAGAGTCCGAAACAGGTTGGT  
GGCAGGAGGGGCAGTTTCTTTGGCGAGCTCGACCCCGCGCTGGGCTCCCATCTGCT  
GAAGTCGCTTTACCGCCTTGTTCTTCGTCAGGTCCCGATCTGTTTCGCTGAGCAGGTT  
CTTGAGCTCTGTCCGAGATGCGGCTTGAAGTGCCTGATGGCTCGATGCCCGGTCGTA  
GAGCACCGCGATGCGTTGAAGATCTTGCTCGGCTTGGGATATCCGAGTTCTGAGTTC  
AGGCGTCCCATCGGTGCCCTTGTCACCTTGTTAGATGTCAGCCCTTGCAACTCCGA  
TGCAAGGCTCAATGCGTAATCACGAAGTGTCATGGGCTCATCGGAGGACGCGCGCT  
TCAGCTGAACTTCTCCGGGAGGAACGCGGCCGTGACCTGGGCAGGAGCTCCATGC  
AGGCTGAAGCCCAGCGCACCCGCCTCACGACGCAGTTCGTCCAGGACCTGTGCCA  
ATCCAAGTTGATTTGCGAGGACTCTGCGTCCAGCTCACTCTTTAAAGCAAGATTCTC

AAAGGTGCCAAGCCCCAACAGATACTCGGCAACCCGCGTGCGCGCGTCTCGGATCC  
CGTAGAAAGGTATCCCGGCGATGTAGTCAGTCCATCCCCGTTTCTGTTTCGATGGCGT  
GGGCTGCGAAGACGGTTTGAAGATACAGCTTTGTCGTTCTTCCGCTCGTGAGGCCAA  
CTCTGGGCAAGCTGAGGCCAAGGAACGACTCAAACCTGTTGGAAGAAGCCATCCTCT  
TGGGATGCGCTGCCCTGCCCATGAATGTAGGTCGGGCGCCAAGAATCCGGGGTGAC  
GTGTTTCAGTAAGGACGGCTCCCTTTGCTATTTTCGACTAAGCGGTTCGCTGCGAGCTTC  
GTCTTTGATGGCCCGGCGCATGGTGATGACCTCGCCAGACGCGTTTTTCCAGTTCGAT  
GAGAGTCTCGGCAGATAGGATACTGATGGTCTGTCCCTCATAGTCGAAGCTCATCCG  
AACCGCCGACGTAAGCTGTTTTGGGCCAACGCCGCCAACGAGTTCCTCCATGCCAAT  
GCTGTAAAGCAGGCTGTTGAAGAAGGTGCTCTTGCCGCTCGAGTTGCGCCCCTTGAT  
GATGGTCAAGTGCCGAGAAAACGTCTCCGCAATCCCAAATAGGCCGCTCGGGGTGT  
CGAGTCGTAGCTGAAAGGCTTTGATGATCATTGCAGGCTCCACTCCTTGACGCGTC  
GTCGACCATCGCTTCGGTGATCGACTTTCCGATTTCCCTTTAAAAGGGTCTTCTCTACA  
ACTAGGACTTCATTGTCGGACAGCAGCTCCCTTGCAAAGAGTTCGCCATCATCGGTG  
AGCTCGTATCCCTTTGCGTTGGCCGTAACCAAGCCTGAAGCCTTTGCATAAGTGAGG  
GCGTTGGCGAGCATCGGATCGAACCCCCAGGTGACCAGGTCTAGCCTCTTGGTTTCGT  
GAGGCAACAACAAGCTGCTGTCGTCGCTCCTCGGACTTCAGTGCCCAGTTGAAGAG  
ATGCAACCGGAGCAGGCTGGAGCGATTTGATCGGCAGGCGAGCAAAAGCGTTAGCA  
ACACTTGGCTGATCTTGTAAGGGGGGCGGTGCTCTGGGAGAACCGGCGATGGGCGC  
AGTTTGAACCTTCAGCGTCGACATTGGGTGAGGCTCCCTGGTCCGTGCCGTAGTCCAA  
CGTGCAGACCGCAAGCCACCGCGCGACAGTGAGGCGAGCCAGCTTCTGTGCGTTCA  
CTGTCCCTACCTCATGGCCCAAATACTAGACGCGCTTCCAGATCGGTCTTGATCT  
GAATGGTTAGGGCTTCAGGCGTTCCTGTCCAAGTGATGCTGTCTTCTTCGACCCGTC  
GGGCGTATTCGTCAATAAGAAGTGCTACCCGCAGATAAACCGCTGGAGCTTCGTGCT  
CAAGCTGCCTGTAGAAGTGATCTGACTCAAGGAAGTTCTTGGTGGTGACGTTTACCA  
ACTGATCTACGTTGCCCTTGAGCCAGGATGAGACACCTTTCCAGATAGGCGGGCCT  
CTGACTTTCGGAGGATGTTCTTGTCGAAATCCTCGCCTCCGTCCGCAGGTAGTGCCA  
GGGGTGGCGGAGTGCCAAGGGTTAGCGGCAGGCCATGCGCAGTCGTGAGTTCTTGG  
ATCTCAACGATGTAGAAGTCTATGTCATGCAGTTCAACGCTGAAGTCAGACGAGAG  
GAAGGGAAGGTTCCAGGCCTTGACCTCTGCCTGCTTCTTCTGAGCATGCGCAAGCAA  
CTTGTTGTGATTGATGTGCGGCGTGACAAAGCACCATTGACGAATCTTTGTCTCCCC  
AAGCCGGAGTTGCAGTTCCACGCTGTTTTTTGACAGCTTCAGTTTGCCTAGGGAACC  
TCTGAACAACGCACCGCAGATAAGCGACACTACCCCATGTTGAGGAGTGATCCAT  
GCAACTGACGTTCCGGTGACGCTGAGGGCCTGGGCAAGCGCAAGCAGACTCGCCGGG  
AGA

>CONTIG\_159\_length\_2948\_cov\_10.714640

CGCGGGTGCGCTGCCACTGACCAGTATCGGCGTCACGCGTCCAGTTCGCTGGCAACA  
AGCTTGGTAGATCAGTGCTGCTGGCTTCCAAGTTGTATGGGCTACGCGGGCGGCGCA  
TCCGGCTCATCGCCAGTTCGACAGACGTATTGGCGGCTCGGTAATCCAACCTCACGTC

GGGTATCGAAGTCTGCCGAAAACGTTGTCTGCTGCGGATGGTCAATTCCATCGGCGC  
GAAGATCAGCAGCCATCGGCTGCACCCATTGCCGCCCGTTGAAGCTCCACTGCCTGC  
CCAGGGAGTCCACTTGATGCGTGATCTCACGCTCATCCAGGGTCGCCATTATCTTGT  
CAGACACGACGTAACCAGCAACGCCGCCCACTGCCCCACCAACGGCAACGCCAACT  
GGGCCACCAACTGCGCCAATCTCCGCTCCTGCCCAAGCACCGGCCAGGCGCTTGCG  
TTGCTAGCGACGTAATTGCGCAACTCGTGCTTAGCTCCCAGCAGGTTGTCCTGCGCG  
AGCAACGTGCCCACCCGCTGACTGGTCCCAATCGCATCGGTCGCCGATGCCAGCAA  
GCCCCGTTACGCGAAGTGCTTGCCCTGCGGACAAGCTACCTGCAAGAAGCTCGGGGG  
TGGCAAAGCCGCGCTGCCCTACGGGAATGCGTAGCGGTCTCGCCGCATCCGCTCCTA  
AAGCCTGCTCGACTTGCAAAATCCCCTGCTCAGAGAAATTTAAACGGCCATTGCGGT  
GTGCTTCGGCAATGGCTTGCGAAAGCACAGTTCGTTCGAGAGCTGGATTGCCGCCCT  
TGGACAGGTTTTCGCTCGATTGAACCATCGACTGCAGCGTTGTGGACACATGCGCTT  
CGGACTGCGTGATCGATGACCAGGCCAGCTCTGACGGCAGCATTGCCCCAAAGCGG  
CCAATTTGTGCTTGGTGCACTTGTTCTGTAGCTGGGGACGTTGCCGAAGAAGGACTGC  
ACCCTTGGCCGAATATCGTCCGCTTTCAGGCCCAATGGCGCATTGGTGTAAGATCA  
CTATTGATCAGCCCCGTTTCGCATGGTGTCTTGCAAGCGTTCTACTTTCGCGGCAAGCC  
TCTGCGCCGCATCGGGATCACCCGCTAGCATCTTCTGACCGTCAGCGCTCCGTTCAA  
ACCGATCAAGCCAAGTTAGTGTGCCAGACTGATACGTGCCAATTGGCCCTCCACTGT  
GTGGTGGCAAGTGGAGCGCCGATGCAAGATTTTTACTTGCTGGCATAAAGATGCGAT  
TGCGCTGCGCATCCATCTCAAAGAGGCCGTCGTCAGCAAGATTTCTTAGCAACGGAC  
TGTTATCGAGTGTTTGCTGCTCGATAACATGATGATCCTGAAACAACGGGCGCGGTC  
TTGCCATGAAGCCACCTCTACATGGTTTGAGCAGTCTTACTGGTCAGCAGCGTCGGC  
AAACCAAAGCCCGTCCGAATGACTCTTGGCTCCAATCCCGGCATGCCTGACAGCCTC  
ACGAAGCACGCTATCGCACACAACAAGTATTCCAGAGTAGGGAACCCGGAAAATAT  
GCGCCGACCCAATAACGCCTTTATCAAAGGCCAGCTTGGCGCCACCGGAAAGATCG  
TAGAATTTGCCATTGACGAAATCATCGCTGATCTCAACCTTCAACTCTGACGCTTCTT  
CGTCCACTGCATCGAGCACACGCACAACATCACAAAGATAGTGTGTTGGGCCAACT  
GACCCATCTGGCAGTCGAAATTCACATTCGGCAAACCTCAAACCCTGCGGATCGAC  
CGCCTCAAAGACGTTTTTTAAGCGCTCCGAGACAAGCCAGTAGCCGCTATAGATGCC  
TTCAAGATCGCGGGGCATCTTTCCTTTTTTAGGATCGTAACCAAGCCGTGGCGTTTG  
ACGAAGCGGGCGGGATTCCCTCCCTCGACCGGACGCAAGATGCGACGAGGCGGGGTAA  
GAAGCTCTTTCGTTTTCAAATACGACGCCCCGAGGTCTTCCAGTTGCTGCGGATGTC  
CGGCAGCAAAGTATAAAACTCGCCTTCTTAGGCCCAACTTTAATATTCATATACGC  
TCCGGATACTGCACCATAAAAAAGAACTGAGCGATCAATAGGTCGCGGGCGTCGGTG  
AACAAAAGTCCGTCAGAACTCGGCTTGACACCGACACCTGCTTTTCGGGTTTCGCTC  
CTCAAGAACGCATCGCACGCTACAATCGAGGGCCTCTCACTCATTCGAAAGATGTGT  
GCTGACCCAACAACCTCTGGCAGAAAAGCGAGTTCGGCTCCACCGGTTACGCTCAG  
CATTTCCACATCTTTGCCCGTCTCGTGGTCATGTGCCAGGGTGACCTTGTATTTGGAA  
CGCGGCTTGTCTAGCGCAGCCAACCTGTCGAACGACGTCACACAAATAATGCGTCGG  
CCCTGGTGAGCCATCTGGCAAAACGTAGTCGCAAATCGCGAACTCAAAGGCACCTG

GATCAACAGACTCCAGGACTTCCTTCAGTCGCTCGGAGACGAGCCAATAGCCGCTA  
AAGCCACCCTCAAGATCACGGGGCGGCTTATTCTTGCCCTGCGCCATGGACCAAGCG  
AGGTGTTTCTCGCAAGGGCGGAATTCCGCCTTCTGCAGGACGAAGGATGCGCGAAG  
GAGCCGTCAGCAACGCCTCGATGTTTTCAATCTCAACGTTGTGCCCTGGGCCACCTC  
CTCGGATGTCGGGGCCGCAACACATAGAAGTGTCCCTTTTCAGGCTTCTGCTTGGCAA  
GCACCGGACTGTCTTCCATCTGGATCATGATGAGTTCTACTAAATCTTCAGGGCTCT  
GACGCTCACCTCCGGCAACAGCCGCTTGGTGAAATACGCGTCTTCGTAATACTTGAT  
CTTCTCGCAGAGCACCGGGCTTGGGATGCCTTCATAGAGGAAGACTTCCTTGTCAA  
GCCATCGCCTTCAACTCTTGCGGCAGCATCAAGGCGCGGCGCTGCTCGGTCT

>CONTIG\_160\_length\_2921\_cov\_15.071582

GGATCTTTTGGCGACGGTGGCCACCGCCGCGGTGCCGGTCGGCGTCTTGGCCGGCTT  
GGCGGGTTTAGCCTGGCGCGCACGCCCCGGTTCGGAGTCATTGTTTCATGTCATGCAG  
CAACCAAATGCTTTATGAACTGGGTTGAATTATCATTTAGAATGACGGCACCGAGCA  
ACGCGTCTGAATTGCGATTGCGGCATGTTTCATTGAATTCCACGGGAATTCCTTCATT  
CTCGAATAGATGCCCCAGAGCCTCTGCCGTGCTCACTGAGAAATCACCATCTCGCTC  
TCCTCCATACATTGCGACGCGCATTGTCAGGCCATTGGTCCTGACGGCATGTATATA  
ATCGCGAATGGACGCTAAAACGTTTTCCGGCAGCAACTCTTTGTGATTAAAAGGCAG  
GAGATGGAATACTCGAACTTGCGCACCCGGCATGCGTTCGCCTGTGTAATAATCTAC  
TTTCTCCGCAGCGCATGCGACCGCAATACATGTGGTCATGTTGTCGGTGACTACAGG  
CATGTTCACTTGACTGGTTCAGTGCTATAAAGGTGCCGTGTCCCTTCATGGTTAGGT  
GTCAGACAGTTGTATCCCGCCACTTTGACGGTAGTGGAACGATCTATCTCAAAGCTA  
TACGGGGATCCCGCATCAAAGCTGTCGACACGAACCAATGGGAACAAAGATCCGCT  
ACGATCTTTTATTGAATTACCAGGGCATCCTCTTTCTGATTGATAGTCAGCTATAGGA  
ACTTGTTTTAGCGTATATTCTCCATCTCGCCTCGCCAGTCGATGATGTGACAATCTTG  
GCGGGCGCCCGCTTAAACCATCGAATGCTCCTGCATTTGAAGCTGCTGGTTGATGAG  
AGGATGGGGCCGTGACATTCGGGGAAGATGAGGGTGATCCTACATTTCCACCGTAT  
CGACTGCCGGAGGTGCTCGAAATACATTGACCCATGATCTTTACCGAAAAATATAAT  
GGCATTTTCATGCTAGATCCATTACCCAGTCAATTCAGTGGGTAGTGAATTATCGT  
ATCCGAAAGCGAAGGAGGAAATTAAGGAGGTGTCCCTGAAAACCTCCATTAAGCAA  
CTATTGCTCGCCGTGATCGCTATGTACGAATCCGTGCCGGCCCTCAAGTACAGTGGC  
CGCCAGCCGATCCGGCCGTGGTTCAGCCGACATACGTGTAAAAATGACTCGAAGA  
ATCCGATTTCTTTTGTGAAAACATGAAGTTGCCGGACAAAACGGCGCTTCCATCGGC  
TAATCCACCACCTCGTCCCTTTTCGAGGTTTCGGCACGCTGCAACTGTCTTGCTGATCA  
ATGTAAACCAAGGCTGCACACCCATGCCTAGCGCTCCAACGGGGCGGTATGCCGTG  
GACTCGCAAAGCCTGCCGTCAAAGTGTGTAAGGGTCCGGCCCCCACGGTTGGCTCCT  
CAGGTTTGGTGTTGAGATATCGGTCTCCTTTAGATGAAACCGCTCCAGACGCTTTAC  
GAACTGGCGGCTCTCGTCCTTCGAGGCCACCCGCAGAAAATCTATTGCGCGCTGTAG  
ATACACAAGCCGCTTCTGCTCCAGTGAGGTGCTTAATCGTCGAGGTTCAATCACCTT  
CGGGTCGACGGTTCGCGAAGGCCGCGCTGATCCATTTCAAGGATTACGAAAGGCC

ATGGATGACGCTCCGACGCGTGTCGGCTATATCGGTCACCGATCGTTTCGCCTCGGG  
TGTTGATGGCTGCCGCCGAGAACCCGGCTGATTGGCCTCCGCCCATTGACCAAGGG  
TGCCGCCGGACTGCGAATGCTTGAAGAATTGTGCGGGCAATAGCGGCTTCCCGTCGA  
TCATGCGGATGCCGCCATCACCGACCGCTGCTACGGGGATTTCGTTGCCGCTCCAAT  
CCTCGAACGCGTCACCATTTGACGTTCCGATGGTGGAGGTCATCCATGAGCGTGTGTT  
GATCTGCTGCTTTGGACGTAGCCGACAGCGCGAAGATCTTGCATCCCGTCTGCGCCT  
TCTGGGTACTCAAGCAGAGCAACGTCGTCTCCGCTTTGGATGGCAGCATCTCCTTGA  
GTGCTGGAAGTACATCCTGGCGATATTGGGCAACCCGGTCGGGATCCGTTCCCAGTG  
GATCGATGATAAGGACCGAACGCCGCCACCGATAATGCGGACATCCACGGCGACC  
GCATGCTCTTCGTAGCCTGGCAGTACGGCTACGGCCCTCTTGCCCGACGTGGGGATG  
CTTTTTCTCAACCATTGACCAAGTTCCTTGGATGTATCGAGCAAAGTCAATGGCGAG  
CCGGGTTTGC GCGCGGACTCCGCGGCGATTAGCGTCGGAATGACTACGGCGTCGAA  
GATTTTTCTTCCTCTCCCGGCGTCCAGTTTCCATCGAGCAGCGCCGCGAAGCGTGCC  
TTGATTTGGCGAAGGGCGTTGATGGCCTCCGTTACGGGTTGAGATGTGCGCGAATCT  
TGCGCCCGTTCTTGGAGTGCTTGAGGGTGCGAAGAAGCAGTGCCAATGTCAAAAGT  
GGCATTGGGGTTCAAAGCGTGAGAAGGCCACATATCGGCAGGATCGGCCAAGTGCT  
CACCAGTCGACGCGCCTTGCCACTCATGGGCTGAGTCATACAAGTTGCCCTGGTATT  
CTGACCAGCCGCTAAACCTTCATTGCCGGACCATCCTGCCCCCTTGCCAATTGGGTG  
AGCCCTGCGGTTTCGGGAGAAAGCCGCGCGACGCGGTGGGGGAGGTAAAGCCTCGCGC  
AGTGC ACTGGTTCGAAGAAGAAGGCGAGTCCCTGCGCGATGGCGACAGCGACTCAGA  
TGGCGAGGGCAACTCTGTAGCGTGGGCTGCATAATGCCCAGCTGGCCCTTCCACGCT  
TGGCTTTGAAGCGCATAGACCCATGTCGATCTCCTGCAGTGACTGTAGAGACAATTT  
TGGCGGGGAGCTCTCTGAATG

>CONTIG\_161\_length\_2912\_cov\_227.398564

CACCGAAATCCAATCGGGTCGAGCCTTGGAATACAACCGGGAGATGTACAAGCGG  
CGCAACGAAGTAGAGAGACTGTTCCGTCGCTTGAAAGGCTACCGCCGGATTTTCTCG  
CGCTTCGAGAAGCTGGATGTCATGTTTCCTTGGATTCCCTCAGCTTCGTCCTAGTCGTTG  
ATGGGCTTCGGATGTGTTAACAGGCCCTAGTAAATTATTAGCGAAAAGTCGAGCCCA  
GTAGAGCCCTTCTTTTCCGATCACACGCTCAGCCTGAGCTCTCGATAATTTAAAATT  
GTTACGCAATTCTTACGCCGGCCTGCGCTTTTTCCTAGGCGAAATGATGTTACATGCT  
TGTCGCCGCTTAGACATTCAATATATAGAACTAATGGCTTGACATGCTCCATTATTC  
GATTACAAAAAGCAAGCCACCCCTTCGATTACACCAATATGAAAGTTGAACAATTT  
TGGAATAAAGCTTTTCTTGCAGCACTACCCGCTACCTGCCGACGAAGCGAAAGCA  
GAAGCCGACAAAGCGACTGAACTTTGCATCAATCACTGGCGCTCACATGCCACGCA  
CTGGGCACCTAAATACTTGGCGGCATGGAAAGATCAGGAGATCAATAAAATTTCACT  
ATAAAGAATCCAACGCATGAGTTACCTCATACCATGACTGCTTGAATTAATTGGGAC  
ATTGGCCATTGCGATATCAGCCTTCATCGCTACAAGCGCGGATTCAGCACTTTCAGG  
AGATGTGAACATCTTAATCGCACCTAAGACTCCGCCGCCAAGCTGAGCTAGCATATA  
GCGGTAAGCGGGCTGCTTCTCTGATCTTCTGGACTGCCCCACCCACCTTCCCACAC

AGTTATTTCCATCACCGCCGCGCCTATAGATGGCTCAAAGGCAATTACGGATTTTCGA  
TTCGTATTTATGTTCCGCAACGGGTGCCTCACCCGCAGGAGACGCTACTGGACACTC  
ACCAAAAAAATCACCGATACTCTGAGTTGAAACGATCGGGTAGCCTCCATCGCGAC  
TATTGAAAGCAGAAGCATAGTCGTCGTATTGGTTACCAATCTGCTTCGGCGGGCTAT  
CCCCACTCAATACGACAAAATAAGACTGCGCTTTTATACAACCAGTCGCCTCGTACG  
GAATATCTATTTTACAAATCACTACATCAACCATACAAACGCTCCATAAATTTATCT  
GCGCGACCCTTTAAGCCAATTGCTACAACCTTTTCCCATATTCAGGCAAAGCAATCGG  
TGGCCTAAACCGCGCAAGGGTCATCACACGATCCGGAAGTGTGCGTCGATCAATGT  
AGAACTTCTCCAACACCCCCTGCCCTCGCGCATGACCCGTGATCGCCGCAATGGCTG  
AGGCCGACACACCCGCCTCATCCAAACGCGACGCGATGGTGTGGCGAAAGCCATGA  
AAGCCTTGCCCTTTGCGCGTGATTCTTGACGTTTAATGTAGACCGAAAAGTGTGCG  
CTCAACTGTCGACCAAAGCCCAGTCCGGTGCTATTGGGCAGATGCGGAAAGATTTGC  
GTGTGCCCAGCTTGGCGCACTTCATCGATGTAGACAAGAAAGCCGGCATCGATCAC  
AGGTTTGGCCAACGGGCACAAAGCGGCGGCTGTTCTTGTTCTTGACGCTCTGCCCCCT  
CCCGCCCTGCCGCACGAAGAACCCTGGCACCCCATCGATCGTGTGCGATGTCCTCTAC  
ACGAAGCTGCGCGATCTCATTCACCCGCGCCCCTGAGTAAAGCCCAAGCATCGGGC  
CAAACCATCTGTGCGGATACTTCTTGGCCCATGCTGGGAAGGCCACCGGATCGAAG  
ATGGCCTTCAACTGGTCATCGGTGAAGGGTTCACCCGTGTGCTCTGCATCGGGCGTC  
GAGATCGCCCGGATACCCGCCAACGGATTGCTCGCCAGAAGCCCTGCCGACACCAA  
CGACACCAAGAACACCGACAAGCGCTGTCGATGCTTGGCAACCGTCCAGGCGGCAG  
GCTCGGGAACCTTGATTGGCTTGGGCAAGCGTCACTACATCCATGACGGCAAGGCCCT  
TGTAGGGGCGCGCCTTGGTCGCATTTCGACGGCCACCACCTCACGACATCGAAAAAT  
GCGCGCACATGGTCTGCCGTCAACTCGGACACCGCCAGGTCCTGTCCCACTGCGCCC  
GCGAACAACGCAGGGAATGGCGACTTTCAAGCACTGTCTTGCTGTGGAGCTTCGC  
GCGACCCAAGTCCCCCAGGTGATCCGCAATCGCTTTGGACAACAATGTGCCAGACG  
CCTTGGCCAAGCCAGTGCGCCAGCCGCTTGGCTTGGCGGACGCGGCATTTCCAGCGG  
CAGGTTTCGCGCAACAACCTCAGCAAATAGCGCTGCGTCCTCGGGGGTATCGATCTGG  
GCTTTGCCCAGATGCGTGCCGTTAGGCAGCGTCACATGGGTCAATGTGAGTTCGCGC  
AGTCCTTGTTCTCGAATGCGGCGCAGCACTTCGTCCAGATCCACCGGCTTCCCCTGC  
CTCAATGCTTGGAACGCGTTCGATAGTGCCATCCCCATGTAGGCAGACACCAGACGC  
GCAGCGTCGCCGGGGCGAAGATTGAGAGGACGAACAAGAAAACGCGAGCCGACTT  
GCCCCCGCAAATCCACAGGAACCAAGAAGCGCACATAGAGGCCTGAAGGCCGATGC  
AGCAAGAGGGGTTTTTGGCAAAACGATACCTCAAACGATACCTTGGGAGGTCGTTTCG  
AGGCGGTCTTCAGTCAGGCGAAATAATCATCACAATCAACAACCTTAGAACTGAAAT  
TCGCAAGACTGGAGCGGGCGAAGGGAATCGAACCCTCGTCAGTAGCTTGGGAAGCT  
ACAGCTCTACCATTGAGCTACGCCCCGCGTGCGGTTGCGAGAGTTTAGGCGGGTGCGG  
GTGTGCGGCGCAATGCGCAGACG

>CONTIG\_162\_length\_2891\_cov\_19.928365

AGGGTTGCTCAAAGACCTATTAGAAGAAGACGCCAAGGGAAAAGTTAGGACCGAA  
GAATACAAGGCACTATTTTCGATTGGGTGTGGCCGATGTCCTGGCGACCGAGTCCGAC  
ATCGAAGGCCGATTTGCTGCATTGGTCCAGCGTTGGCCAAAAGTTTTGGAGCGTTTT  
GCTTATGATGTCCAATGCGTGGTGGATCGACTTTCGTTTCGACGGCATTCTTCGTGAC  
ATCGCTGATGCTGAGTTGAACTTCTTCGGTAAGCTCAATGGGCTGGTTGTGGATAAC  
GCAACGAAATTCCTAGGCATTCCGATTTCACTCGCTGCCATTGCTGCACTAGTTTCTA  
GGCAATCGTTAACGCAAGACCTGTTGGTATGTATTGGCGCGTTGGTCGTCGCGCTGG  
TGATCAGTGGTGTAGTTAAGTCTAGTCGTTTTTCAGCTCGACAGCACTACCAATGCAT  
TTGATGAGCTTGCCAAACGTTTGAGCGGTAGGGCCAAGCCAGACGGTGATGTTGCG  
CAGCGCATAAATGAGTTCAAGCGCGCTTATGACAAGCGGAAGCAGTTTGCTCGTCG  
GGTTGTCGTCGCCTTTCATGTGTTAGGGTGGACGCCTATTGCTTTTGCTGTCCTTATC  
TTTATAGCAAGCTATCCTCCTTGGTGGTTGGAGAAAATCTGCCAGTATTGTGGTCTTT  
TCCCTGTGCCTTGACGGAGTCAATAATCATCTCAGTCCCTTGCTTTCAGAAAGGTTG  
ACGAGAGAGTTTTTTGCCCTATACAGGGCTTTATGAAAGAAGAAAAAACAGTATTT  
TAGCCAGATCGTGTTGTTTTATCGATGTGCCTGTAAATGCTAAAGGCGCTGTTTGGCT  
TGTGAACGAGGTAATAAGGGCGGCATCTTATTTTATAGATGGGGCCGGTTTGCGCTG  
GGAGCACCTTTGTCATGAGGTTGCCCCTGACCTAACGCCTGGACAGCTCTCTGATCT  
AGTGATGTGGGTTTTCGCAATTTTTTCCAGAAGAAGGTGTGGTGTGCGGACGTGCATGC  
TTGGTTTCGTCCAATCGCCCCTTGTGGAACCTCAAAATCAAGCATTTCAGCTATTCGGA  
GTGGAAGAGCTGGACGCTCATTGAGCGGTCTTGGGAGCCACTCGAAGTGCATCTCA  
CCCTCATGCAGGTGAGGGGCGCTCTCAGTCCTGTGGTTGCATTTCAGAGACGTTTTGC  
GGTGTCTGCTCATCATGTGGGGCGGGAAGATGCCGACCATTGGTCCGCTGAGGATT  
TGAGCATCGAGCAGGGGGCTGCAATGGAGAAAAGCATCGACGTTGCTAGGTGTTTA  
CTGGATGCGTTCATCATCGGCGAAGGCCATGGGATATGGGCGAAGCTTGACGATTG  
GCGTCTGCATCATACAAATCTTGGCGAAAAAACTTTATTTCTTCGTCTTTGCTTTGT  
TCTCCTTTGCCTTCTCAATCTGCTTAGCGAACAAATCTTCCGCTGACCTCATAGCCTT  
ATCTTTGATGGTCTGATAATGGCTCAGGTTGCCAGTGTTTGGTGATTCTGGCTCATTT  
TTATGGTGGAAAAGGCCTTCGTGTAGGTATGAGTTTAAACGATTTCCCGATTTATT  
CCATAGACATTGGCGGAATTATTCCAATTGTTGGACTTTGGAACCTCCTTCGATACG  
AAGTAAAATCCAATAATGTAATTAATTCTGGATAGCGCAACTAGTTGTTCCCAAGTA  
TTTTGGTCCGGCCAATGGGTGTTGACTACTTCAATGATAATTGTGGGGTTGATCTTGG  
TTCGGTTGATGCGCGTTGTGTCAATGCCGATGATGTCAGGTTGAATTGAGTGCGTTC  
CACTCAGCATTAGTCTCGTGGCGGGATCTTTATAAAACCGGTAGATCGATGAGGGAT  
TGCTGGTCCAGACGTTTTTATGCAACTCTGTTTTGTCTTCCATATGCCTGTCTTGGC  
GGAAATTTTGATGGGTGCAAGTGGTCGTGCGGGCGGCGGCGGCGACGTGCGATTTA  
GCTGATTGGCTAAGATGTCTATGGCATCGTTGTGTGTCTCATCGATTTGATCTGGGTT  
CGACGGCGACCGTTGGGACCCCGATTTTATGTTTAAAGTGAGATCGGTGGTCGCCTTT  
GCGTGGGTGAGCACAGACCGGATTGAATTCAACATCAAATAGCTCTGGCCCCATCTG  
ATCTCGCTTGACTTTATCATCGATGTCCTCGGGGAAAAAGGTTTCTCCCTTATCATTC  
CATACTTGTTTGATTTTCAATTCGGCCATTGCTTGTCTTCCAGGTTATCTGTGGTGTGT

CTTAAAAGGCACGGGGCATGCTTTGCTCAAGACCGACTAGACCGCACTCTGCCTCAA  
AAATCCAATGAAGTTCTTGCTGGCTGCACCATTGTGCGAGGAATCAATAGCCCATTC  
CACTTGCCAGAGCGAGAGGGGATGACTTACCGATGAGTCCTGCAGAGCTTGGGTTC  
AAGTCTTCGCCCTCGCCTGGAAGGCGAGCGCTACCGCTGTTGCCATATTCTCGGGAC  
TAAGAGTCAACAACCTGCTTCACCACCTCGTCGACATCGTTGCCAGCGCCGCCCTGGC  
GTTCAAGCTGTTCCAGCTTCTTGCCCAATGCGACCGGGTCTGGGTGAAGTAGCGCA  
TGAAGGTTTTTCAGATCTTTGTGGCCCGAGATCCTGGCCGCTTCCGCTGGATTGAGGT  
GGTGTCCCATTTCCGTGATGCGCGTGTGGCGAAGGTCGTGCATGCGCGCGGTCAAAA  
TCTCTGGGTCTCCTAGCTTCTCGGCTACTTGCTGGCGGACCCGGTCCCAAGCTTGCGT  
GACGGTGTCTGCTCGAATGCGCTTGCCGCGCGAGGTCACAAAGACCGCTCCCTTCTT  
CGTTTCGCTGGCTTCAAAGCGCCCCGCGATCAAGGC

>CONTIG\_163\_length\_2887\_cov\_86.094565

ATGCCGCACGCCTGTTACCGGTGCCCCGCGCGCATACCGCGCTGGACGTGGGCGTG  
ACCAACTGGACGGCGGGTTTCAACTACGACATCAACCCGATGGTCGGCATCTACTGC  
CGCGCCTCGCGTGCGCACCGCGCGCCCAGCGAAGGCGCCAACGAAGGCAACGTCAA  
CATCCCCACCGCCGACCAGTTCGAGCTCGGCACCAAGCTCAATTTTCGACACGCTGGA  
CGTGTTTCGCCACCGCCTTCTACACCAAGTACGACCCGTACAACATCGGCACCAGCGC  
GGTGAACCCGCAGACCGGGCGCAGCCGAATCCAAGGACTACCGCGGCAGCGTCACCA  
ACCCGGGTATCGAACTGGCGGCGGTATGGACACCGGGCGCAGTGGCTGCGTTTCGAT  
GCGAATCTGACCTACAACGACACCAAGGTGTCCGATCTGACCGAAGTGGTGGCCAA  
TGGCGCGGTGGCCGTGGTCGATGTGGACGGCAACATGCCCAACCGCCAGCCAAAGG  
TGTACGGCAATGCGGGGGCCAACGCTGTTCTTACCACCGGCAAGTTCGATTGGGAAA  
CCTCGTTGCGCTACGCCTATGTGGGGCAAGCGCTACGCCGACCTGGAAAACACCACC  
GAGCTGGCCGCCTACGACACCCTGGCGGCCAACATCCTGGTCCGCAGCGGGCCGTG  
GGATGTGCAGCTGTCGGTGGACAATCTGACCAACACGTTTTCGCTCACCGAAGGCA  
ACCCACGCACCGACACCATCTCCGGCCAGGGCACGCGCGAGCCGATCTACGGCCGG  
CCGATCTACGAGCGCAATTTCGCGGCTGGTGGTGACTTACCACTTCTGAGCGCGCTGA  
CGTTGAATGCTGCATCGCTCGATGTCAGCGCCTTACGATTCCGATGCATCGCCTGCA  
GCGTGGCATGCCCCGCTGCAGGCCACAAAGGACCTTCATGACACCTTCCCGTCTTGCC  
TATGCGCTGCTGTTTGCAGCAGCTACCTGTTCCGGCAATGCCGCCGCTGGGGCCAC  
CGCGCGCATGCCGCCATCGACAGCGCTGCGGTGCAGGCCCTGCCCGACGATGGCCC  
GACCTTTCTCAAACAATACGCGCAGGTGATTGCCGACGGCGCCACCCTGCCGGATG  
GCTGGCGCAGCGAAAGCGAGCCGTTTCTCAAGATCGAAGAAGACCCCAACCACGGC  
TGGTTCCGCGAGCAGTTTTCTTCATGCAACACCCGCCGCGTTCGCGTTATGCCTTCG  
TACTAGCGCTCTACGACGAACAGCGCCGCATCGCCAAGCGCAACCCGCAACTGGCG  
CAGCGCATGAACGTGCGCTGGGCCGGCACCCCTGCCGTACGCGGCTACCGAGGGTTA  
CGAGCGCATCGTCGCCACCATGCGTCAGATCCGCACGCTGCGCGCCAAGGGCCAGG  
ACACGCGCGAGCTCGAACGCACCTGCGCGTTCTTCGTCAGCTGGTTTTCGCGACTACA  
TCGGCGATGGCGCGCAGCCGCAACACGACAGCATCCATCACGATGGCTGGCAAGGG

CCAAACCCGAACGGCTACAGCACCGACCCGAAGGTGCACGGCAAGTTCGAGAGCGA  
CTACGTCGACAAGATTGCGCTGACCCCGCAGGACCTGCTGCGCCGCATGCCGGCCCT  
GGCGCATCAGCAGGGCGATGTGTTTCGAGCAGATCCTTGGCTTTCTCGACACCGGTAC  
CGGCCGTGTCGAGCAGGTGTATCGCCTGGAAAAAGCCGGCGCCTTCGACGATGCCG  
CCCGCAGCGATGACCGCGCGATGGTCTATCTACCGCCGGCGATGGCGCGGGCGATG  
CTGCGCGATCTGCTGGTGC GCGCCTGGCGCGAAAGCGCGCTGCAGCCGGGCACATC  
CACGCTGCCGCGCAGCATGGACCCGAGCCATCCGCAGTACGACCCGGCGACCGGCT  
CCGCGCCTGCCGGCACCTCGCCAACCTTGTAACCGCCGTTGGCGAGATGGGTGCGCC  
GCCATTGGCCGACGCGCACGCAGGCCTTGGCCGAGGGTGAACGCCTGCATTCCGAG  
CACGCGCGCATAGAAATCGCAGGTGGCGTCCACGTCGGCCACGGTCGATCCCAGAT  
GATCGCGTCAGTCGATCCGTATCACTACCGCGCGCAGGATGCGGGCGCAAACCGGC  
CGTAAGGCCGCGTGTCGTCGGCGCGTTGGCGCAGCACGTAGGCCGCCGCAAAGGCG  
AGCGCCAGCAACGTCAGGCACATGCCACCAACGCGCCCCATCCACCGTGTTGCCA  
GAACCAGCCACCGAGCGCGCCGATCACGCTGGAGCCTGCGTAATACGCCAGCAGAT  
ACAGCGACGCCGCATGACTGCGATGCGCACCGCCGAGCCGGCTCACCCAGGCGCTG  
GCGGCCGAATGCGCGATGAAAAAGCCGATCGTCAACAACACGATGCCGGCCACCAC  
CAGCGCCAGGACATGCGCCAGGGTCAACGCCACGCCGAGCACGCACAACACGATGC  
CGGTGGTGACCACCGGGCCGCGACCGAAACGATCCGACGCCGCACCGGCCACCGAC  
GAACTGACGATGCCGAACACATAGGCACTGAAGATCATCCCGATCTGGCTCTGGCT  
CAAGCCGAACCTCCGGCCCCGCCAACCAGAAAGCCGGCGTAGTTGTAGAGGCATACGA  
ACACGCCCATCAACAAAAACGGCAACGCAAACAGGAAAGGCAGATTGCGATCGCG  
CAGATGCCCCGGCCCAGGCGCGCAGATGGAAGCGCAGATTGATGCCGTGCCGGCGCA  
CGAAGTTGCGCGACGGCGGCAGCAACCAGAAGAATGCCAGTGCGCACAGCAGGTC  
GAACACGCTCAATACCGCCAGTGCGGTGCGCCAATCGTAATGATCGGTCAGCACGC  
TCATCACGATGCGCCCCGCT

>CONTIG\_164\_length\_2869\_cov\_170.489424

ACGATGCCGCAGGCGACCATTGGCGGGCTGCCCTTCACCACGCACAAACACTTCGTT  
AGCGGCACCGGAACAAACAGCGGCACGCCTGTCACCTGACCTGATACCATACCGCC  
ATGGCTACCACAAACGTCCCGCTTCCACGTTACGACCGCCGGGCTACTGGTTCCC  
ACCGAGCCCCGAGATCCTGTGCGGGCGTCTTTGCGGACTACACGGCGGGCGTTTGCCCCC  
TACGGCAAGGCGCTCAAACTGAGCTGACGACGCCGAGGGGCAGCTCGCGCAGAG  
CCAGGCGTATATGCTGTCGGCGCTCAACGCTGCAATGTTGCAGTTGATCCGAAACGT  
CGATCCGCAAACCGCGCAAGGCGCGTTTCAGGACGCGCTCGGCAAGATCTACTTTCT  
GACGCGCCAGCCGGCGACCTACGCCACCGTGAGGCGACCGTGTTTCGGTGTAAGTCG  
GTCAGACGTTGCCGATCGGCTCGCAAGCTGTTGCTGACGACGGTTCGATATGGGCGA  
CGACCAATGCCGCCACGTTTAATGCCGCCGGCAGCGCAACGGTCGTCTTTCAGGCCG  
TCGCCGCCGGTGACGGTCCGACGGCTGGCATCAACGGCCTTCGCATCTATCAGCAGC  
GGCCGGGCTGGGAGTCGATCAGCAACGCGACGGCGAGCATCCCCGGCACCGACGTG  
GAGTCGCGCCAGTCCTTCGAAACGCGGGCGCGCCGAATCCGTCAACATCGGCGGCCA

GGGAACGGCGTCGGCGGTGCGCGCAGCGATCGCGAATGTCACGGGCGTGACAGATG  
CCTACGTCTACAACAACGGCAGCGACGCCGGCATAACCTACGGGGCGACGAACTAT  
TCGATCCCGGCGCACAGCATCGCGGTCACTGTTGCCGGTGGCGACGAGATGGAAAT  
CGCACAAGCAATCCACTCCAAACTCGACGCCGGGTGCGGTCTACCCACCACGGGCG  
GCCAGGGGCTGCTGATCACCAAGACGGTGCAGGACGATGTGAACTACGTCCCGCCG  
TACCCGCGCTACCAGATCCGTTTCGTACGTCCGGCCTTCACCGTGCTGTACGTGCGC  
GTGACAGTGGCTAACCTGAGCACGCTGCCGAGTACCTATGTGCAGGATGTGCAAAA  
CGCGATCACCGAGGCGATGACGAACGGCTTTGCGACAGCCGACCGCACCATCTCCG  
TGTCGCGTGCGCGCATCGGCGGCCAGGTCGTCGCCGCGGCCTACCTGCCGGCCATCC  
AGGCGATTGGGCGCATCACCCCGGTCGGCATCACAGTTGGTCTTACTCCAAATCCGA  
CAGGCTCGGCGCTGACCCTTGGCATCGACCAGGCCCGGTGATCTCTCCGTTCAACA  
TCAGCGTTATTCCCGTGGACGTCTGAGCGTGAGCGACTACAGTAAAACGGTCATGAA  
ACAGTACGCCAACAGCCCCGCGCTGTTGGCGCTGTTGGACTCTTTCGACCAGTGGGT  
CGACCTGACCAAGTTCACCGATGACTTCCTACTCAACATCTGGGACATCGAAACGGC  
GACTGGTTTTTGGTCTCGATATCTGGGGGCGAATTCTCGGCCGTAGTCGCTATCTGCA  
GATCCAGCAGGTGCCGGGCGACAACCTTCGGTTTCAACATCAACACCGGGACCGGCA  
CGCAGTGGAAGCCGTGGGGTCAGGCGCCATTCTTCAACGGCCAGGCCGCGGGCAAT  
GTCTCCTTTGCGCTACAAGATGACGCATATCGTCAGTTGTTGCTCGTCAAGGCCGCA  
TCAAACATTGCAAGTTGCGACGTGCCGGCCATCAACGCGTTGATGCGCGGGATGTTG  
GGCAACCGCGGCCAGACCTACGTCCGGTACGATCCGAATTCGCCGATGCACATCGG  
CTATCACTTCGAGTTCTTCCCGACAGCCGTGGAGCGGTCTATCATAGAGTCCGGGCT  
GTTCCCGCAGCCGGCTGGCACGACGGTCCGATTTCTGTATAAGACGCTCACGTATAG  
CCCGTTTCGGCTTCGCAGGAATGAATGCAGGTGCGGACCCCGATTACGTGACGGGCTT  
CAATCAGAGCCCCTTTCTAAATTCCATCTGAGGTTTTCGACCATGCAATCGACCAATC  
GCCCCGGCTAAGTTCTTGGTGCCCTTCGCCCAGAACGATAGCGCGCGCGTCGAGATCC  
CGGCCACGACCGCCGATGCGACGCGCTTCTCCAGTCGCTAGGCTCTCCACCGCTGA  
CTGGCATGCCACCCGAAGCCGGTGGCGTCCCGCCGACGCTCGAAGACTTCAACGGT  
GCAATGAACCAGATCGCGCGCGGCGTCTGGTGGGCGCTCGGCGGTGGTCGGTTTGC  
ATACGACAGCGATTGGGCGAACAACGGCCTGATCGGCGGCTATGCCCGCGGCGCCG  
TCGTGCCGGCTGCACTAGGTGCTGGCTCTGTTGGCCTAGGTGAGTGGTACAACAACA  
CCGAAGGCAACACTGCCGATCCGGACGCGGTCTGGCACAGGTTGGGTGCCTGGCTAC  
AACTACGGCACGACGACGCTCGCCAATCAGACTGGCGGCACAATCACGCTGACACC  
GGCGCAAGCGGCGAAGCGCAAGATCGTGGTCGCGGGCACTCTGACTAGCAACTTGG  
TGCTGATCGTACCGGGTTGGGTCTATGACTGGAACCTTCTACAACGCAACAGCCGGCG  
CGTTCACGGTCACCGTGAAGAACGCCGCAACCAGCGGCGTTGTCATTCCGCAGAAC  
TCGCAGGCAACACCGGTCCATTGCGACGGGTCTATCGTCTCGGCATTCAGCCCGAAC  
GTCGGCCTGGCGACGCTCCCCACGACGCCGGCGCAGTTCAGCCAGACCACGGGGCG  
GCTGTTGAACGTGCTGCGCTTCGATGCGTCGGGAACCTACAC

>CONTIG\_165\_length\_2854\_cov\_13.818849

GCTGGCCGACTACAACCAACAGATACCGCACGACAGCCTGGGCGGGCTAACACCCG  
CCGAGTTCCGTGAGCAACATCAACCGCAGACCTCTAGTTTTAGCTGGCATTGAATTG  
CGGGGAGTCGACACCTTGCTAACCGATGTCCGTACCGAGTCGCGACGCATCCATTCC  
GGCTTGTCGCGCATGCTTGGCTCATCGCCAAAAACATGTTCTGCAATCGATGACTC  
TGGTATGTCGATTCAACCGAATCTAGCAAGCCTTCAAATAAGGATAGCTGCCACTTA  
CCGTCTTCTGGCTCTACGCATACCTGGTTCGCATTTTCGCTGCCGGGGCGGCGTGCA  
CCAACAAGCAGCAATTCTGCATCAGCCGGTGCACCCAACTTCTTTAGCACATTTTCGC  
GCCAGAATCTGGATGTGAATCCTGTAGCTTGCTTGATATCCCCACATGAAAAGGTAA  
ATGATGCTACCTGCCATCTCAATTCCTCCTGCCCGCTGACTGCCGTGCCCTAAGACA  
GATGTTTTTCGACCTACTTCACCATTTCATTCCACATCTTGATGGCTGCCCCTATAAACG  
CTTCCGCGTCAGCTTTCTCCCATGATGTATGCGTACTTTCCCAAAGCAAGTAATACTG  
CTCATTGGCGCATAGCAGCTTGTCCTTATCTGCTTCTGTCTGAATCCAATTCATGGCA  
TTGACAAAGCAATCGGCGTAGCTAATTCCAAACTTTTCGTTTGGCACGTTGTAGAGC  
AACCCTTCCAGGTAGTATGAAGGAGCAATTCCAGCCTTCAAGTCACCGTCAGCAAC  
GAGTTTACTTCGGAGATTCTTCAGGACGCGAACCATGGGCTTCAGCCATTTATTGCT  
GTCCTGATGCTTCCGGGTGAGGTTTTCCGAATGCTGCCTGGGGTAATTGGCGATCCG  
TTCGCCAGCCCCATTGAAGAAACAGAAGCCCTCATCGTAGTGCGAGTCGTAATTCCC  
CTTGAATTTCCAATAACGACGAAATTGCATTGATGCGATAATGTCTGCCTTGCGCCG  
ATTTCCATTTGCCGCCACGGCGATGGCTTTGTCTCCAGCCTTCACATCTGAGCCAAA  
ACGGTCAGTGAGGGCCTTCAGAACATCCTGTTTGTATTGATCATATGAATAGGTGGC  
TGGAACGAATGCGCGATCATA CGCCTCCTTATCCTGTGGTGAGAGCTGTGTGAGATC  
GCTGTAGTAGACATCGTCAAGCCGTATGACCACATCAACATCACTTTCCGCATAGAT  
GTTGGTGTCATTTCCATAAGAACCCTGAAGGAATACTTTGAAATTCTTCCCGTGATA  
CGCAGAATCTGCACTCTCTAGCGCGTTTTTTTATAGTGCTGTAAGTTGAGGCGGACTG  
CGTGATAGATCCTTGATGGGACCATGTTTCGAGCTGCGATT CAGGTATTCCCATTTTG  
CGCCTCCCTCATGTCAAAAACCTCCCTTAGTTGTATCTCACGAGCCGCAAATGACTCG  
CTGCCACGCTGTCGTAGGATATTCAGCTTATCCAGGTTGTGCTCCAGCAGGTCCGGTC  
GCCATTTCCGGTCGTTTCAATGTGTGCTTATCCGAATCGTTGGGATATCCTTGAATA  
GAATTTACGCAGCTGATCCATCGATTGTGTATTAATCTCAAGGGTCTTCTGAAGCA  
ATTGGACGGCGAGCCATTTCTTGGCAAATCGCATCAGCAGTCCCGGCTTGGGGTCAG  
GGTAAATGCCTACACCGACATTTACGACCCGGATATCCTTATGATCCTTTTTTAGAG  
CGACAGTCGCGTCCGCAACTGCAAACAGGGTGGGATTGTTTGACAGTAGCCTCCAT  
CGATCAGTTCAATCTTGTGCGCCAGCGGCTGTGACTACCACCTTCCTTTCGAAGAACG  
GATAGGCAGAGCAAGACGCTTGACACAGCGTCAGCGATGCTGACCCCGAATCCGGGA  
CTGAAGGTTCCCTTGCGGCCATGGGCCTGCGCAACGCTCCCCTTGAAGATCATGGGT  
CGTTCGGTCATCCAACGGGTGGCAACGATACCGATCCCCGTCATGACATCTTCAAAA  
GTCTTGTCTTGGAAAGACTTCCTTCGCCAATTCCTGGAGCGCCGCTGTTCTTGCTGCAG  
CAGAGCGGCTGGACATGACTCGCGGTACGTGTGCGGTGTAGAGCTCGTGTATTTGGT  
CTACTTCATACCCAGGGCGATGAGCGCGGCAATGATTGCCCCGGTACTCGTTCCGA  
ATACAAGATCGAACCTCTTGTATAACGGGCACCCAAGCATAGCCTCAATTCCTTGA

GAACGCCCAGTGTGTAAAAGCCCTTCGCACCACCGCCATCAAGTGCAAGAACACGG  
CAAGTATCGTCTTTAGCGTACTCTGTGACGAGCAATGATGGCGGAGCGGAGCTAGTC  
GTCATTCCCTTTGTCTTCCTTGTTGCGCATGATGGCATTAACTCGTTCTTGACCTTGT  
CTAGAAGCTGGCTGATTTCGGGCTGTTTCGGTACCGGCATAAGCATTGGACTGAGCGA  
TTCCAAAATGCACTCGAGTTGCTCAGCAAAGCCTGCCACCGTAACCAAGACTAGCG  
CTTTTCAGGTGCCTAAGGTGAAAATGCCGTAAATGACTACATGTGCGCTCAAGTAGC  
AGCCGAGGAGGCGGCCTTTTGTTCGCTCAACTGGGATGCTCACTTTAGAGAGGCAA  
TCAAATGAAGCAGTAGCGCTTTGCCGGCGCTTCAGGCTTAATTTCGACCTGATTAGCC  
CTGACCATCAGCCGCCTGTGCGCAGGATCTGCGCCGCGCTGGGTGGATGCTGCTGTCA  
CCTGAAGCCAACGAGGTGGCGTGATGAGTATCAATGCCGTGCAGTTCCAAGCGGGA  
TT

>CONTIG\_166\_length\_2846\_cov\_10.337992

ATACTGGACTGCTCGGTCTTGCGTTCATCGGTTTGTCTCCACCAGCGCGTTGT  
GCGCCTCGTGGAACCGACAGGCGAAGCGTCCGGCCCTACCGCACCCGAGAGCGAG  
CACCGCGCAAGCGGCGCGCAGCGGAGGGCCGCAACAAAGCGTCAGCGTCGAGGAG  
GAGGCCTGCCCTTGCGGTTCGGGACAGCGGAGCAAGGATTTCCGTTAAGAGGCCCAT  
CGCTGGTGGAGACAGCACCATGCATGCCCCACGGGGCCTGCGGACCAAGCGGCATT  
TGGATGGGCGGGGTTCGATTAATGTCAGCAGGCGATGACTGGGCTTTGCAGCCAGTG  
GTTGAACTACTGCGGACCCGTGCTTGCTGAAGCCCGCATGGCTGCGCATGAGAAG  
CACACAAGCTTCGGGATGGACTGGTCGGCACCAATGGACTCAGACGTGATCGTCCG  
TGTTTTTCGAGCCCATGCCAAGACAAGATTTCTCGGCCCGACGGCCGACGAACCTGCG  
CGTCCTCGCTCGTCGCTGCCTTGCTCTCGATGGCGGCGGCCATGACTGTAAAAGCTC  
GCCAAAAGTGGCGGCGATCAGGACTCGATGCCCCGCAATGCTGGCACCGCTGCGTCT  
AGCTGATTGAGGTGGATGCGTAACTCGGCTCGGTCCATGGGCCTGAGTATCGGCAGC  
CTTGTCGCATTGCTTGAGACGCATCGCCGCCAAGGCAGCGTGGAATTAATTTTCGGG  
TGCCGGCACGACGCTGCTCAAGCATTCTATGGGGGAGCTTCTCAAAGCCTGGCAAC  
GCCCAACAAGCCCTAACGTGTAGGCCAACGAAACGCTTTCAACCTCGCCAGCGCCA  
CCTGGTTCCCCTCACCCCTTTGAAGAACGAGAGTCTCCTGGTTACAAAGAAAAACGCC  
CCAGCTTTGAACTGGGGCGTTCTTAGAAAAGCTCGACCTGATCTCAGCTCGGCAGGG  
TTTCGATGGGACCTACGTCACCCGTTCGGAATTCTGCCGCCGCAAGAGCCGTAGCAAC  
CGCCGCCAATCAGCACTCCACCACCACCGCCGGTTCCAGCGGAGCCGCCACCA  
CCACCGCCGCCGCTTGAAGGCTGCTGAGCAATCTTCTCGGCCATTTCTTTGCCTTCT  
TTCCGCAAGGCTTCTCAATGTAGACCATGCCCCGGCCAGTATAGTTGAGAATCTTTA  
CGGTGTAGGAAACATACCCCTTATAGGAGTTTGTGACCCAATTCCCCTCACCCAGCA  
CTTTAGACGCTGCCGAATCAAGCCTGTCCATAAAAAGGGCATTGGCAGGATTCTTG  
TGTCGCTAACTTTGGCAGCTGCGTCAAGGGCACCTGAATAGGCACCAGTGGCGGC  
ATCGGGAGTTCCGAGCACGCAAATGCAACCCCCATAAGCCCCGTCAGTGACATCGC  
AGCGACGCCAGCTTTCTTCATAATTCCCATTTACGCCCCACTCCTTTTAAAAACAATT  
AACCACACAAACCTACTGACCGATTGGACGTTTATCCAATACCGGTGCCCTGCCATA

CTTCGAAGTGTAGATCCGGTCTATTTCTGGCGTTGAGTCGCAAGGCTTCAGATTCCCC  
GAGCATTCTTTGCTCTGTTGAAAGTGACTTAGACATCATCACTTCTCGAGTAACAGA  
GGCACGGGTATCTCCACGCATTTCCGCCACACGCGACACTGCATACGCAGCAACAG  
GGTCCCCGCTTGCGCTGCCGCCTTGGAAGGACGCCAGCATATTCAATGCAAAAAGG  
TTGCCCTCAGCTCCGGCGTCTACCAGACGCTGTTGCGCCATAGGATCAGAAGCGAGT  
AATCGCGCGTCCAAGATCGTCTGTGCGACTTTATCCCCTGCCTCTGAGGCCTGCTTC  
AGCAGCGCCTCTGGCGCGCCCATGTAGGCGTCGAGCTGTTTTTCATTGGGAAAACCA  
TGACGATCTAGCCACTTCTGCTCGGCCTTGCTTTCTGGCATAGCCCCGGGTCGTTATCAA  
AGCTCATCCCATCTCGGGTTCGTGGAACCTCTGGAAACGGATGCCTGACACGGGATC  
CAGTCGCCAGATGGGAGCCCCCTGTCAACGGATCGAGACGTGACCTGATCTTTGACTG  
ATTCGTTTGACGCGTTGGGGGTCTCGTGCTGAGAGTTGCCCTGCACTTGGACGTCAT  
CCTTACGGGCTTCATGCGCCAGATGATGCCAGCGACTACCACGGCCAGTGCTGCTG  
CACTTAGCGCTACTGCTTTGTTGCCCATCTCACCTTCTCGTAAATCCATTACAGCTGC  
TAATACGCAGTCCTATGAAGCAAATTTTTGCAGATCAGCTCGCCTTCTGCAAGCTCG  
TTGGTGTGGCGGCACAGGGCTCCTCACGGTGTGCGAGGCATCGAAGACGAGGCGATC  
TCGCGTCCAAGGCCTCAGTATAGGCGGCGCCGTGCGATAGACTGAGACAAACTGGC  
GTGAGCAGCGTGGCTCATGCCACTCGAGTGATTCAATCCGACGCCACTCAATCGTCT  
TGCGAGTTATGCACCTTTGCCCCGTCACGGGCGGCCATCTGAAACAGTAACCAGGAC  
CGGTTGCCGACGACGCCTTTACGCACTGATGAGCCAATAGCGTTTTTAACTCGACTT  
ATCTCCGCCTAAGATTCTAATAATACTAACAATAATAAACTAACATTTAACTTATAT  
TCATTTCAAGAATAGACCATCAAGACTTTTTAGTTAGCTTATTTACTGCAAACAGTA  
CAGAATTGACTGCGATAAATCGACACAAAGTCCCTCACAGCCCTTGGTATATAAGG  
ATTTCTGCCAGGTAACGAATTGGCGAATCCGGGAAGCACCCCAGAGGGGACACCCC  
GACGCCTAAGG

>CONTIG\_167\_length\_2814\_cov\_6.538519

ACTGTTCCGTCGCTTGAAAGGCTACCGCCGGATTTTCTCGCGCTTCGAGAAGCTAGA  
TGTCATGTTTCTTGATTCTCAGCTTCGTCCTAGTCGTTGATGGGCTTCGGATGTGT  
TAACAGGCCCTAGTTTTCGAGCTATTCGAAGAGCAGCCGGAAACCAGTAGCAAAAAG  
GCATTTGATACTCGGCCTGGTCAGAACAAAGCACCCCAGCGTGTACTTTTACGAACC  
CCAGGCTTTGCGCGTGAGGGATGGGGGCTGTGATGCAAAAGGCCACAGGCAAGCTCG  
GTTTGTGTTGAAGGAGCGTATTGCAGAGTGATGCAAAGAGATATCGGCATAACGGA  
GTCGATGGCAAAGCCCTTTGTAGAATCAGTTATGAGGTGTCTTGCTGGAGAGCAACA  
CTATTTTCCTGCTTTCAAAGGGGAATATCCGGTTCAGGAGATCCGCAGATCATTGGA  
AAGCGGAAAGAATGTTGCATACGTGCTGTGCACGTTTCGATCTATCCCGTTTCGAAGCT  
CTACGAACTCTTCCCCGGCGGCCTTCCCAAGCCTACTGAAACCTTTTCGAAGAAGTGT  
TGGCCAAGCGTGAGCTGCACTTGTTGCTCTAAAGCGGGCTGATCAGTTCCACGGAGG  
ATCCCCGGGTCAGTATCATCGATTGGCGGTACACTGGCGAAAAATGGGAGGGGTGG  
GAATGTCAAAAAGTAGAGTTTTTATAAGTTTCGACTATGACAATGATGCGCGCCAGA  
AGGATCTGCTTGTTGGGCAATCTAAGCACCTGACACTAATTTTGAGTTTGCCGATT

GGTCTTCTAAAGAACATCTCACCGGTGACTGGAAGGCCAAAATCAAAGCCAAGATG  
GCTCATGTGGATGTAGTCTGTGTACTTTGTGGCAAATCAATGGTCACAGCGACAGGC  
GTTTCCCATGAAGTGCAGATGGCGCAGGCGCTTGGCAAGCCTTATTTCTACTTGCG  
GCCTATACGGTCGGGAGTACTAAGCCAGCAGGAGCGTACAGTTCAGATAAGTTATA  
TAAATGGACATGGGAAAATCTTAAGGCTCTGATAAAAGGAGGGCGCTAATGTCCGA  
GCCGCAAGTCCAAAAGGAGCGATTGTTTAATGAAATTGAAGATGGGGTTGAATACC  
CCCACAATGAGAAATGGTATAGTCACTTGCTCGACCAGTACAACTTTACGTGCGAAA  
TGGCTGACAGGATTAGTCAGCGTCGAGCTACGGCAAATACATACTTTTTAAGCTTAA  
ACTCCGCAATCCTAGCCTTTGTGGGATATTTGTCTGTAAAAGAGACTGGTGAATATA  
ATTGGATGCTTGCATGCGGTGGGGTCGCACTTTCCGCCCTCTGGCGGCGTTTGATTGT  
TTCGTACTCAAACCTGAATACAGCCAAATTCAAGGTAATTCATAGCATAGAAAAGA  
GGTTGCCAATAAGCCCCTATGAGGCGGAGTGGGTCGCTATGGAAGAGGGGAAGAAT  
CCCAATCTTTATCGGCCTATTACCCATATTGAGAAAGCCGTTCCACTGGTGTGTTG  
CGCTGCATCTAATAGTTCTTGTAAGGATGTTTCCTTGGGAATGGTTTAGCAACGGCG  
CCAAATGGATATTTGGACTGTTGAATTTTGGCAAAGCTGATCTTAATACTATATATC  
GAGAGCCGTGTTTGGTTTAATTGCGGGGAATTTTATGAGTAATGGCCGATGAGTTTT  
GTGTCATCTTCGAAGCAATTGGCGAGGCTGCCAAGTGAGGTGCGGCTCGCACATTAC  
TATTTTTTCTATCTCCATGATGCGATTGCCCGTATGTTTCGTCTGAATACGAGGCAGCTA  
ATGCCATGGAGATAAAAGTAAATTTTCGAGGGGAAGTCTAAAGCAAAGAATTTAGC  
AAAAACGCAAAACGTTATGATCCAATCACAGCGCTCCGGCATGCGGGTCTGCACGC  
GGAGGCGAAGCGCACAGTTTTGAACGCTATTACCATGGCCATGAGCTCAGATTGCG  
CTCACCACATTTACGAAGCGCTGAAATGTTTTGAAAAGAGAAAGATAATACCCGGA  
TTTAGCCTGCTTCGTAAGCCGCTTTTAGATAACCTCAGCTATTTTTCGTGGATGGTAG  
CGGATGAAGATGGATTTTATGATGATTTTACTTGCGGCGACGTCAGTAAGATAACCC  
AGAAGAAGCTTGGGAATAGGCGGAAAGAACTAATTGAAAATGCTATAAAGGCCATC  
GAAGTTGAGGGGCTATGCAGCGCAGGGCAGATTCACGACATCATTTTTAACAGCAA  
AAACGATTCTGGGCTTTATGGTTATTTTCAACATGCTTTGCATTTGGTAACAGTAGAG  
CGCTTGGAGCTAAAAACATCACCTGAAAATTTTAATTTTATCTTTAAAAACCCCAAT  
GATGATGATGTTTATCTAACGCTTTATTCTGTGTTGCCTCTAGTTATATTCTATCTCGC  
ACGTGTGGTTATGCATCTTTTCGACAGAATTAGCCGATGGATCCTGTTTCGAAGGCC  
GCCTTCATCTTGAGATCGCAAGCGGGCTTGTTGCTACTTCGGCATAAAGGAGCAGAA  
AGAATGCTTCATATTTTTGAGGGAATTTCTGAGGCCGTTGAGTGTTTCTCCTGCGGCG  
GCGCCCTAAAAATTACCGCACGCAACGTTGAGCGGATTGTCCTGACGGAAACAATG  
CGGTGCACGAAATGCAGGCGCGTCAATGGATTTCCTTTTGAGGCGTTTTTGACGGTT  
TAACGGAGCTTGAAGCTCAGGCTGCGGCTAGGTATAGGTTTTCTGTCTGCTGTATTCT  
TGAAGATGGGGACAGGAATGGAGTGGGT

>CONTIG\_168\_length\_2805\_cov\_19.343913

CGAGCGCGTGGACCTCGGGCAGGATGGCCGAGAAGGCTTCCAGCAGCCGCACGCGT  
TCCACCACGAATTTGTCCACCCAATCGTTGATGGTCTGCCGGTCACGATTGGCCGCG

GTCTTGCGCTGCCCCGTCTGGGTCAAGTGAAGAACCAGGCGCGGGCGGCGCTCTCGCG  
CGCCTTGGGCGGCAGCCACCCGAGCGTGAAGTAGTAGGTTGTCTCAAAGTGCACGC  
CTGTCTCGGCGATGCTGCGGCGCTCTTCATCGATCAGATAAGACATCGGATCGGGGA  
AGTGTTTCGCCGCTGGGGTAGCTGGTGCTGGGGGCACGTTGTGCGTCGATCTGGAAAT  
ACCAGCCGTCGCCAAGGCGGCGGAACAGGTTGTTCATCTGGGCAGACACGGCGATC  
AATTCGTGCTTGGTTGCGGAGTCCAGATCTGGCCCCGCGATAGCGCAGCGTCGTGATC  
AACGACGCGTTGCGGTTTCAGCACAAACGCCGGGGGCGACCAGGTATGCCACGGCAG  
CACATCGCCAATATCGGTGGGTTCGTTGCTGTATTTTCGGAAGTCGCTGCATGGGTTG  
GCCTTCACTGAGCGCCACCGGCAATGGTCCGCGTTGACGGACCATTGCCGGTAGCCC  
GCTATGCGCGGTAGTGGGTTTTCAAACGGAGCGCGCGTTTCAGCGCTTCCGGCCATT  
GCGTGTCGTAAGTGGTTCAGCAGGACCAGGCCGATATGGATCACAAGGTAGAGCGGA  
ACGCTCCACCACGATTGCAAGCCAAACACCAACGCCGCTGCCATCGTGAACGACAC  
GATTGCCATGTCGCGAGGGATTCCAGCGATGAGACGGGGCGTGGACAGTGCGCGAT  
GCACGGGCACTTCATAGCCATCGGGATTGGCGTTCTCGTCCATGTCAGAACACCGCG  
CCGCCGCCGTAGCCCAAGAAGTTCAGGAAGAACGTGGAGGCTGTGAAGGCGATCGA  
CAGGCCGACACAGACCATCATCAGTTTGCATGCGCTGAGCCACCTTCGGAAGAGG  
CGATGCCCAAGCCACAGCTGATAATGGCGATGACGCCGATGGCCTTTGCGACAGGG  
CCGCTAATACTATTCAGGATCTGGTCTAGCCAGCCTTCCCACGGCATGCCGGTACCG  
CCGGCGTAGGCGGCTGCCGGCACTAGGAAGACCGCCAGCGTCAGCAGTTGGAGGGT  
GCGAGTGTTACGGAGCTTCATCGTTATATCCCTGGAATGGGTTGGGGGAATTGATAT  
CGTTCCTTCACATGGTTTGCAAAACCATTGCACACCATGCCACGAAATGTAGCTGAC  
AACGCATACAGCTGCAATGTCAGCTACCCAATTCCATCGTCCATTCTTTGACGGGCA  
TCGCAGTCAGTGATTTCTACACAGCACGTAGGAAAACAGCACCACTGCCCCACTGC  
TCAGCTCACTCGGCCGCCACCAGCGTGTAGACGTTGCCTTCGGGCGTCTGCTGGACG  
CCTCGCACGCGTAGCACTTCACGCACGCGCCGGACGGCCTTTTGGCCGCCGTCCGCC  
TCGATTGTCTCGAACCCGATGCTCACGATGATCTGCACCGTGCGCGCAATCTTGCGC  
GGAACCGGTAGGAACCCGCCTTGCACTAGCAAGTCCTCGATGCGCTCCAATGCTTCG  
TTGGCGCTATTGGCGTGGATGGTGCATAGCCCGCCGGGATGGCCGGTGTTCAGGCA  
TCGAGCATGTCCATGACCTCCGGGCCACGCACCTCGCCGACGATGAGGCGATCTGGT  
GTCATACGCAGCGTATCGCGCAACAGGTGCGTCATGCTGCGAGTAATCTGGTCGCGA  
TTCCGCACGGTGCGCAGGCGCACGACTTCATCAGCTTCCACGCGCAGTTCTAGCGTG  
TCTTCCAGTGTGATCACCCGCCCGGTGATGCGCCCCATTTCGTACAGGACAGCATTG  
GCAAAGGTGGTTTTTGCCCGTGTGGGCGCTCCGACGATCACGATGTTGTGCGGTGCG  
TGCACCGCCTTGACGATGATGTGCGGCTGGTGCTGTGTCAGCTGCCCCGTTGGTCACG  
TAATCGTCGAGCGTCAGCCGCAGATTGGACTTCTTGCGGATGACGAACGTCGGGCCA  
TCCGGCGATTCCGGCGGCAGGATTGCATGGAACCGATAGCCCGTCTCGGGCAGCTC  
GGCCGGGAAGCTGGGATTGTCCTTGTGCGCAATCTCGCCGACGTGATCGGCCACGAT  
CTTGATGACGCGGGCGCGTGTATTCACGTCAAGCGTATGGTCGTGGCAGATCCTGCG  
GCCGTCCTTGGCATACCACAGGCGGCCATCGGGGTAAACGCGCACTTCCTCCACGGC  
TGGATCGTCCAGCAGCTCCCCGATGGCGCCACCAGCGCGGATTTCATCATGTCCAG

CAGACGGCTATGCCGGGTGATGGTGGTGGACACGGTGGGATTGGCGTTCATGGGGT  
GGCCTCAGGATCGTGGTCGGCGTCGTCGGGCTGCCCCGGCCGCTGCTTGCAGGGGCATC  
GAACTCGCTATCGGTTTGGGCACGTAGCAGCGAGGCGGTCAACTTATCCAGCAGCG  
GCGTGCGCCCCGCTAAAGACCCGCTCTACCGATGCGATCAGTGCGTTGTAGAAGCCCT  
CCCCTGCCGCGTTGCTGGCCGGCGTAGCGGCCGGCAGGCGTGCAAACAGGTTCTTCG  
TCGTGAGCGTAGTTAGCTCCACCAGCATCTGATTGCCGAAGTGCACGTTGCGCACCT  
CGTTGCGCAGCGATCGCAGCTCCTTCAAGACCAGCATTTCTTCGGCTTTGGCGTGTT  
GGGGTCGTAACGCTCGGCCAGCGCGG

>CONTIG\_169\_length\_2792\_cov\_4.889681

CTGGTCAAGGACGTGTTTGAAGAGGACGGCATCCCGTGCATCCGCATCTCAGACGA  
AGGCGAGCAACAGAAAGTAAAGACGGAGGTCAGTCTTCGCACGGTGCCGCTCCACC  
CCGAATCATCAAGATGGGCTTCCCTGGCTTGGGTGACGAGAAACGCAAGGCTGAC  
CAGATAAGGCTGTTCCCGGCCACTAAGGCCACAGCGGTGAACGGGCAAGGCAATTG  
GATCACCAAAGCGTTTAGTCGGCACTTGGCCGAGGTGGGGAAAGGCTGGGAGCCGG  
CAAAAAGAGGTTTTTCATTCGCTCCGGAAGACGTTTATCCAAGAGCTTCAGGGCGTGG  
GGGTGGTGTCGGAGCTCCGAGCACAAATCGTGGGGCATGAGTTAGATGATGAGCAT  
CATGCCACCTATGGCCGTGGGTTTACCGTGCGTGAAAAGCTAAACGGCCTGGCGCTA  
CATTCTCCAGGGCTTTCCTCTATAAGGCTGCTCGCTTCGCGGAGCGACGTGCTGAGT  
CTGACTCATAAAGCGGTGGATATAAATGCGGAAGAATAAATACGATGTTATTGTTGC  
AACTATATTATTGTGTGCGATGGCTTATCAGTGTAATCGTCTCCTCAAAAGGGAGGG  
GCTGGCAACTTATGCCGGTGCAGGCTCTTTGATTGGCGGCGGAAAAGAGAATGGAT  
TGGCTTTGAATAGCCTCGGAACAGAGGGGCTTAACTGTAATGAGGTAAAAGGTGAG  
CATTTGAGCGATAGGCTTACCTATTTTAAGGTGGTGCTCGCAACTGTGTTGGTGATA  
ATTCTGGGTGCCTTCTGCTTTTTTGCATTTTCAAGATTCCGTAAAGGCGCTATTGGATT  
ACTGCGCTTATGCTTTCCCGATATTGGCAGGAATTGTGGCGGGGGTGGGAGTCTATC  
TTGAGCGAATTGGGTTTTTGAAGGCGCGGATAAGAAGTCGAAAGTTGATACTATGT  
GCTATCAGACTTCAGTCCTAACGCTTTTTCATGGGGCTTGTCTCATATTTGTCATTGAA  
AGTTGGTCCGCTAGGTGTCATATGGATAAGCTTTGGTTTTTGCCGGATCTATTTTGTGC  
TCTGCATTGGTAATCGTTAACAATGCGCGTTTAAGAAAAGGTGCGAGTGATATAGAC  
AAAAAGTTTACTCCGATTGCAAGGGCGTTGCTGGTAATCAGCTTTGCGGTGTCCGGT  
ATGTGGTTCTATGCGCTGGCTGTGAAAACCCAACTGAGTTCGTGCGGCACTCGAA  
TCGGCGTGGTCTAAGCTGAAACGATAAATGGGATCGTTGCAATGCACATCAAAATT  
GCTGCGACGCACAATGCAATAGCCAGCTTTTCGCTCAGAGTCAGATAGCTTGCCGGA  
CTGTCGTGTTGATCTTTTTTTCATAGAGTAACCGCTCCGCTGTCCGCTTGTTATAGCAC  
TGAAGTGTGCGGTGTCAACTGTGAGGGTTCGTAATCGGAGATGTTACAGATTGAGTT  
CTATAATTGCCGAAAGCAGTTTTTACTGGCTATAGACCAGCTTTCCATTAATTCTAAT  
CAACTGAACTGCAAGAAGCTTTGTGCATTACCCCATCGAGAGCCGTCGTTTCGCTGA  
CTGCTTTTTGCCTCTTCTACGCGATTGCAGCTTCAAGGTCTCGGGAGCTCGCAGATAT  
CAGTTTCTTGCTCGGGAGCATAACGGCTGCAGCAATTTCTGCATGGTGGGTCGATCT

AATGTGTGAGCTGAAGCCACAAGACAAGCAATACCATGGGCAGCGCACTCAGCACC  
GAGGTGACTTAGAAATCCGCCATCACAGTCAGCGGGGTCATGACCACCACTGGGCA  
GCGGTAAACCCTGTGTGCGCTGCCTTGCTGCCGAAGCCTCCTCAGCATAGAGCCGC  
TTCGCCTTTCGCAATCCTCGACGAGCCATCAACGGCCCCGACGATGAAGCCGAGCGG  
ACCCAGGAAGAGCAGGCAGGGCTGCCTGTTTGGGGGGGGCATGCTGCTGCGATGAG  
CGCTATGGCGAGATATCGGGCAGGTCTTGCCTTACCGGGAAGCTGGTTTTCGCTTGT  
TCGTGACTAGCCGCTTGAGAGCGATCTGCTGGTCACTGACCCTGAGCTCGGCAAGTG  
GTCCGTTCAAGGAATCGAGCTGTAAGGCACCAGATTCCATGATGGCTAACGAACTC  
ATCCTGGACGACTGCTTGGCATTTCGGTCGTAGGAAATGGCGATGAGGCCGTGGGC  
GTTGAATACTAGAGCGCTGGCTCCAATAGCCACGCAGCCAGCGGAAGCCTTCTTCGC  
ACCGGCGTCCACCATGACGAAGCGAAATCCTTTGAACGTCATGTCCGCACTGACGTG  
CCAGCCCGCTTTGATAGCCGCCTTGGCCTCAGGGGATGGGTTGGGCGGCGACAACC  
GTGGGCATTGCTCGTCCGCCACCAGCTGCTGCTTTGGCGAAGGCAGCTGAGTGGTGG  
GCACCAGTCTTATGGAACCGACGCGCTCGGTGCAAAAAGCAGGGGTTCTGCAATC  
AACGGAGGCGTTACTGATGAGTTCGCTACAGTTTCTACTGTCGTCTTATCTGGTTCG  
CTCTCTACGTCAGCAGTGCGAAGCGCTAGCGCTACCGTCATGGTCAAGATAATCACT  
GCAGAAACAGCTAAGGGAGCCCAATCCGCAGTTTTTTGCGGTGCCCAAGCTGGCAA  
TGAGGTAGGGGTAGGGCGAGTCACCATGGCCCATCATAGATTGGGTTGATTGGCGG  
AGCTATGATGGCGCTTCAAACCAATGGACAGGGAGATCCATCGTAATGAACGATTTT  
GAACAGGTGCCT

>CONTIG\_170\_length\_2777\_cov\_8.846792

GTTTCAGTCACCGCGGCATCGAAGCAGGTCCTGAAGGTCTCGGTGCTCGAAGCTGTA  
GGACTGGTCCAAATGCGGGCCTCCGCAGTCCAACAGGGAAGTGAGGTGCCCCACTC  
GGTGAAGGTCAGCGCGACCCGGGGCCAGTCCAACCTTCCCGAGCTGGGCCTGCTGGT  
GGTTATCGCCTTTGAACAAGTTGGGCAGCTTGCCGGCGCCATTGATCGGCGTGTAGA  
TCGAGCCCGTTCCCTGGCTGCTGGTTTTTGGCGCCGGTGCTCGGCTTGATGCCACCA  
TCTGCTTGCCGGTGTCTGCCAAGCCTTTGCCAGCTGACGGAAGAAGCCCGGCTTCT  
GTTCTTGTGCGTCCTGGGCCTGGGCGACGCCGGCCACGGTCAATGCGAGCAGGGCG  
GCGCCTGCAATCCTTGCGGTCTTCATGAAATCCCCGTCTGTTGGTGGAGGGTGCTAC  
ATTTTCATGAAGAGTCTGCCATGCAGTGGAGGAGCAAGTCATGCTGTTTCGGCCAACTT  
TTCAACATCTGTTACGTGCCGAAGGCTTCCCCTCGAGCTCTCTTTGCTGCCCCGCTG  
AAACAGGCTCGGGAAGTGAAGGCATCCCAAGCCAGCGGGCTTTGGGGGTGCTGAT  
GGGGCTCGATAAGAAGTTGGCTAGCAGCCGGGTCAATCGCTACGAGAACGAGACCA  
GTGGCATCGACTTGGACGGGCTGGGCAAGCTGGCCGAAACGCTGGGGGTGCCGATG  
GCCTACTTAGTCGCAGAAGACGACGCTACCGCCAGGGTCATCTTGTCTTGGCGATG  
ATGAGCAAAAAAGAGCGTGATGAACTTGCGCGAAGCTTGGAGTCAACCCGCTCCAG  
TACTTAGGGTATCTACAGCCGGCGACAACCGACCTCAACAAGGAGGGTTTCAATGC  
AGTCAGAAGATCAAAGCAAACCGCGTGAGATGAACCCACATCTCACGATTCCAAG  
AAAGGGGGCAAGAGCGCGGCTTCAGTCATGCGCGACGTGCTATCTGTGCGCATCTGA

CTTGGCGACATTGATTGGTGCGGTTCTCAGCATCGTTAATTCTCTGAACCTATTCAAT  
GCGGTCCATGCGGGGGTCCGAGATGATTTACTGGAAAGATTGGGCGATAACAGTCG  
GTATTCGAATGAAGATACCAAAGGTCTTCTTGTATTAACGGAGGAAATCATGCAGAT  
GCCGGCGAACTTGAGTCTACTGGTCGACTTCATTTGGAGCTATGAGGAAAAGCTAAC  
GGATGCTCCCCCGCAAATTCTGCATCACTTGGCTGAGTGTCTTGTGGCGAATCTCTC  
AAATCCTCGGCAGACAGACAAGGAATACGCCTTGAAAGCCTGCTTCGAAAATGCGG  
TTCTTTCTATCGAGACTCTCGATGCTACGGCTTCTTCTGCTAAAACCACTCGACTGAT  
CTAAACGCGGGCTTAATTAAGCATGCTGAATTTTCTTTTCTGAAACAACGCTAAAAG  
TCCTGATGGATCGACGAAACGTTCCATCAGGATTACGTGTCTCTTGGGCAACGCCCC  
GGACACCATTGCTTGGGAAGCCTCGGTTGAACGATATGCGGCGACGGCTGGGCGAT  
TAGGTCCTCAGTGTTGCTGCAATGGTGCGCAACTGGATGAGCGGACTCAAGGCACTT  
CAGTCCCACAATGCGATTCTTTGGATACGCGGCCGCAATCAAATTTCTTGTTATTCTA  
CACTCACCTCAGTGAGATTATCTTGAGTCGGATTGTGGATTACATCCAATAAGTCA  
AACTTGATAAGTGTTGCTTTAGGAAATAGCAGTCGTCCCATTCTCTAATTTCTCTTT  
GCAGCGCGGGAATTGAATCGTCGCTTTGATTAATATGATGCCGCATGGTAGTAATAA  
GATTTGCCGCCGACTCGAAAACCTTGCTCACCCAAATTGGCTTTCAGATCTTCGTAAC  
TGTATCTGCCTCCTCTGATAAGGGTTGAAGCTGCAAATGCAGGCTGAAGTTCATCCA  
GGCAGTGCTTCGCTCTCAAGCGAGCAGCAACAAGCGCTTGGTCAAATCGCAGTTGCT  
CAACATGGATCTTAAAAATGAGGTTTCGGATCAGGTGAGTCGATGAGGAAATCCAAG  
TCATCGATCTTTTGAGAAAGCCCTATGGTATCGGGAGGAACAAAGGCGTTCATTCCCT  
AGGGCGCAATCCACATCGTTCTTAAACTGATCTAGCTCCTTTTTCATAGTTCTTATTT  
CATTCTGCTGGGCACCTAGAACCAATAGCGATCGATTAATTGCCGCAATGCGTCGCT  
GAACTTCTCTTTCTGAGTCGCGACGTTCTCCTAGTCGGAAAGCAAACCTGAGCGCCGA  
AAAACGTGCTTAGAAGCGCGAGGAGTGCTATGGCGAGGTCTTTTGATTGGATTTCCT  
CTGCCCATGCGAGAGTTGCTATGCAACCGGAGGCAGCCACGACGGCAAGAACGTAG  
ATCCAAGGGGCAATAAGTCGTGACTGTCTATTCATTTATCTATTCCTGGGGATGGGC  
GCCTCGGAGTTGAAGCTGCATGAGGTTTATTTTAATTATGTGAAAAAATTGCTCAGT  
AGTCTAATGCTGAGTGACCGCAGTCCTTATATTTTCTGAGTCCTTGGGCTAGGGAT  
AAAATTTGCTCGGATCGGCCAAGCACACGGCAAACCTGCCCCCGCTGGTAGCGCGGC  
AGCTCCGATACAGCTCCAGTGCGCTGATTTGCTTGCTGCGCGTCACCTGCGGCTTTTT  
GTGAAGATAGTGCCTGCGTAGCACTTGGACGCGGTCCCGTGGGTCAGTGC

>CONTIG\_171\_length\_2755\_cov\_16.761035

CTTGCTCGCAGCGCGGCTGTCCTGGCAAGTTGCTTATGCACTTCTGCTGCCCCTGATG  
TTGGTGCCCATCTGCGGAACGCTCTTTCTGCGATCTCATCCCGATAGCGTTCTCACCC  
CAGATCGCGCGAGTGCGAAGAAGCAGGGGTCTCCGCTGATATCCCTTCGACCCTCC  
ACGCTCCAAGGATGGATCGCGGTGGTCGTCTTCATCGGCTGCTATCGCCTACCGGAT  
ATTCTTCTGGGTCCCATGATCAATCCTTTCTTCTATGCCCTTGGCATTGGAAAGAGCG  
TGGTCGGATCCCTGCATATCTGGCTTGGTATCCCAGCAGCCTTCCTCGGAATTTTGGC  
TGCAGGCACAAGCTTGAAGCGCATGTCCTTGAGCACGACCATCCTTGTTGGCGCAGC

TCTCCAAGTCCTTGCCCTCCTCGTTCTTGCATCGCTCTCGTCGAACGAGCAGTCTGCT  
GAACTGCTTTGGGCTAGCGTTATTCTTCAAAACCTTGCTAGTAGCTATACCGGCATA  
GCCCTGGTTGCTTACATGTCAAAGCTGGTCACGCTTGGACGCGCAGGTGAGCACTAC  
GCTTGGCTAACCAGCTTTTACTCCATCTTCGGCAGGGTGCTTGCCGGCTTCTCAGGCC  
TAGCAGTGGCTTATCTCACCACGCTCAATGGACAAAGCCAAGGCTATGGCATGTTTT  
TCATTGGCATCTGCCTGACGTGCGTGCCCGCCCTCCTCGTCTACTTGCTCATCATTCG  
GAATAACTTGAAGGAGCGACCAGAGCCGTAAGTGCCATCACGCTGTTGCCTTGCAA  
TGACCTTGGGCTGTTTACGAGAACATGTAACGCGTGAGCTCAGTCGTTATGCACAGG  
CCGGTGCAAAAATGAACACTATTTACTTGACGTTTGAGTGACAGCATCCAAACCATC  
ACTCAGCCTCGTCGAAACCGTCAGCCCAGAAGCACAAGGCGAGGTACGTCCTCGTCG  
TCGAGACATAGATTTTATACGGCCCTTTCGTCAATGTCGCTGGTTGGGTCCAAGCTG  
CATTTTTTATCACGGCCCGAGGCTCACGTATGCCTTCCACAAAAGCATATTTTTTAA  
GATATCACTATATCTTTCACAGCCTCGGGCTTTTTTGTGTCAGCAGAAATTACAGCTAG  
GGCAGCTACTGTCCAAGCCTGAGAGCTTTCATCACTGCGATGAACGCCGAAGCTCA  
ACGCTGCTACCTGGGACTTCTGATCATTCAATGAAACTCGATAGTGACGACGAAGGG  
GCTCGTCTCTGACAATCTCGGTCTTGCCGGCTCTAATTAATTTGTTGACCTGAGACTC  
TTCAACAATAACGCCGCTACTGAATAGCGACACCAGTTCGTCAAGCACTTTTTCTGA  
ACCATAGGCGTCACCACAGAATGTGGCCGATACTAAAATAGAAAAGGCCACGATAG  
CTGAGGACCATACTACTCTTATAAAATTTCACTCCAGCCCTCATTGCATTTAAAG  
CGCTTCAAGTGTCGTCTTGAAGCCTGCCCAGATGTCGGCCCGGATTAGCGCTAACCA  
ATTTGATGCCTAATTGGCTAGCACCAGCGGACCTCATCAGTTTCGACTTCTCGTGAG  
ACCAAGCAAGCACTCGCCCTTCGAACTCGCCTTTACATACACCGACGTTTCACCAAG  
ATTGGTTTTATAGAAGACATCCTTACTAACGTGCGCGAGTGCGCATGGGGATTGGG  
TGGCAGGACGTATGGGGTGAGCGCAAATTTCTGCTTGATCTTAGACACTTCATAACA  
GCGCCCAGGAGCGAGCTCCATATACATAAACTCACTCCTTTATCGAGTTCAAGGCGG  
GACCCTGAACTCAACGAAGGAGATCGCATACTGATCCCGCGTCTTGAACGTATTTGA  
GCGAAAAGCAATGTTCAATGATCGACTTGAACCTACCTGATGGAAATCACGGAGTC  
CAATTCGCGGAAAACCTTCATAGTTTACCGGCTTACCCGGATCATAGATTTTACCAA  
CTATTTTCATCCATGGCGAGCCCTGAAATTCCATCTTCCGCAATGGCGCTTGTGCAGA  
AGACAGCCATCAGCAATGTAACCGCAAGACCTTTGTGCACGCCCAACATTACTGGC  
CTCTCAAATAAGCACGCAATTCAATTTCAACCTGATCTACAGGCGATAAATATCTAA  
AGCAACCGACAACAAGGAAGAGTCATCCTTGACCAAAGCATAAAGCGTCCCCTGGT  
CAACCCTGTGCAGCGCACCGATTTGAGCCAGTGAAACTACTTGACCATCGATCTCGG  
CAATTGCCTCTCCCTTTTTTCGGAAGTCCTGATTTGCTTTTTTGAATACATCATGAGGCG  
CGTTTTACCATTAGTGACCCAGGCTCCCACGTATTTGTCGTCTGAGTGATCGTGTGAT  
GGCGATACGAGAATTGAATCGACCAATACGCCCTTTGATAGCGCACCATCTTTAGCT  
GCAAGAAAATTACCCTTACCAATCTTCTCGGGACGAGGATCTATATCACCAATAATC  
CCTGGCTTCGCCTGAATTTTTAGGTTGGTGGACAGGTAATAGGTATCACCAGAATAA  
TAGTCAACAAATTGAGCGCACGTGCCTTTGATCGCATGAACTCGGACATTGTCAACC  
TTACTTACCTTGGCTAGGGGGACTACCAAATTCGCACTCCCGCCCTCCACATAGAAA

TTGTCTTTAAGCTGAGACTTTTCTGAACATAGAGCCCTAGCAGCACTCTCTCGCTGGT  
CATTTGAGCGGGCCT

>CONTIG\_172\_length\_2753\_cov\_6.168698

CGTTTATGCCGTGGATTTCGGATTTGCGCAAGGGCTGGAAGCACTTGGGGTTCAAGGG  
GCGAAGACCCTTGCGCACGTGTTCCGCAGGAACACCTAGGTGCGCTCTTGCTTGGTG  
AGAAGCCTCTCCTCATTGGCAGCGCTGCCCCCTAGACATTCAGCCTGACGCAAACT  
ATGCTGCCAATCTAGGACCCGGCCTTAATAGCCGGCATGAGTTGAGCAAAACGAAA  
AGGCAGGGGCAATGGATGCGTTCATGGAGGAACTGGCGGGGGATGAAATGCGAAG  
GATCAAATGCCTTCCAAAGCCTGCCAGGTGGGCGGATTTCTCCGCCAAGCGTAAGCT  
GGACTGGAAGCACATTGAGTTCAACAAGGCCAACCACCCCGTAGTCCCAGAAGAAC  
CTGGGTTTTACTGTTTTGTAGTTGGCCTGCCGGGAACTTCCCTGCCCCCAATTGGATA  
CCCCCTTTACGTGCGCAAGACTGAAAGGACGCTCAAGAAGCGTTTCGGGGAATACC  
TCCGAGAGGAAAACTCAGCACGCGGTTCGGATACGCATAAAAAAGTTCCTAAAAGTT  
TTCAAAGGCGAGCTTCTTTTCTTCTACACCGACTTCCAGGGCACGTCGGCAGAAGTA  
AAAGAAATCGAGACAGAGCTTCACGATGCGCTGATGCCTCCATACAGCGATGTGGG  
ATTCAGTGCGGAAGTGCGTGAACCAAGAGGAGCCTTCCAGTGAGTGAGCGAATCTT  
TTTGCCGGCCCTGCAGGGCTCGCTTGGCAGCTGGCTCTACTACTCAGCCTTGATCAC  
GATGACCGAGCTAGTGGAACGCGTTGGCTACGCAAGCAAAATTCAGTCCAATGAGA  
AGCTGGGTCAGCTGATGCAGCGCGCTCTTGACGACAAAAACAGGACGACGGATCTA  
GCCGAGTATCTAAAGAAAACCGAGGACCGATTCTTTAACTCATTGGTTGTTCGGCGTC  
CAGGGCGGGGCACCAACCTGGCACCCATTTGGCCTGAGCAGCACCCCTTCCCGAGCA  
CGACTTAGGCGAGGTCATTGAACGAGATCAAGAGTTAGTGGGCTACCTTGAGCTTCG  
AGGGGATGAAGTTCTCTTTGCTTTGGACGGGCAACATCGTCTTTCTGGAATCAAGAA  
AGCTTTGGAGACGGGAACGGATATCGGCGAAGAAAAGGTCTCCGTCATCTTCGTCC  
CTCACAGAAACACGACCGATGGGCTTCGTTCGCACGCGAGCTCTTTTTATTGCACTCA  
ACAAGCGCGCGGTTCCGGTGGCCAAACGCGACATCATCGCCTTAGATGAAGTGGAC  
CTTCCAGCCATCATCACTCGACAGCTGATTGACGAGCATCCGTGGTTTTAGTCGCGGC  
CAAGTGGATACAGAGCAATTTGGGAGCGCGATTCCACGGACATCTGGTGCTTGGAC  
CACCATTGGCCAGTTCTATAACGTGAACAGCATCATCATCAAATCCATTGCCGATAC  
CAGAGACAATGATGAGCTGAAGCTTGGTGCCAAAAATCGACTGTCAGATGATCGAA  
TTGAGGCATACAAAGCCGATGTTGTTGATTTCTATCGGCGTCTCGCCCAGATCGACC  
CAGCCCTCAAAGTGTCTTTGAGGGTAAAGATATCGAGGCAACGGCAAGGAGGGCT  
AGAACGGAAGAAGATCCAAGGCTCCTATTCCGCCCTATCGGCATGAAGATATTGGC  
GGAGAGCTGCGCTCTACTTCGAAAGAAGCAAAGCGTCGCAGCTTCCTTCAAACAGC  
TCAAAAAGATTCCCATAACCATGGATGCCCGCCCCCTTCAGCGATACAATCTGGAATG  
CGGAAAGGGGCAGGATGGTGCCAAAAGGGGCACCCTTGGCGCTCCGCCTGACTCAT  
TACATGCTCGACCTCAAGCCTGGCGACGAGAAGCTTAGGCAGGACTATGCTGACTG  
GGTAGGCATCGATCGGGCAAATACGCGCCTTCCGAATCGTTGGAAGTAAATACCTC  
ACCCAAAAATTCTTCATCAACTTGACAGGAAAAGGCAATGAACCCTGCGTCCATAA

GAGCAGCAAAAGAGCTTTTGGCTGAAGCGAATCGCTTGCTAGAGGGAAATGAATCC  
CTTGCCGACCAAGACACGATTCGAGCCCCAGCTATTTTTATAGATGGGGTAAAAGAT  
TTGCTTGAGTCACTGATTCAAGCAGCGGTAGTGAATGGCAACTTGGAGCAGGAACC  
GACGAGCTTGATCTAATACTTCGTTGAGAGCGTATCGTCGTGAATAAGCCGTCGGCA  
TCTATCCGGATGTCGTCAGCCAACTGCGGTTTCGCACTTAAGGAGCGCCCAATATTT  
CACCATAAAGCCAACAAAGTCATTTCCATTTATTCTAAATTCAGCGTTTCGGCGCACG  
CTCAGTTAGCTTATTTTCAGTTAAACATTACCGTCGTCCACTCCTGAAACGCATCTTCT  
ATGTCCTTGACATGACTAAGCACACAGGACTTGAGAAACGGTTTGCCAATATCGAA  
GTCAGCAGCATGCCGCTGCTCTTGAGGGTCACGAATATCCACACTATGTCGAGGTC  
AGTAAACATCACCGCGTAGCCGATAGTATGCGTAAGCTGATCGCTCTGTATTGCCTC  
TGGTTGCCGTAACGCGGCCCGTTCTTCTCAAGCGTGGCGCAAAGCCGGCCTTCGCCA  
CAGGGAGCCACGTCCGCACGCGAAACGCGATCCAGGTAATCGACGGACGCTCGAAG  
CTGTGCGAGTTCGGTTCGCTTTTCGTTGATGATGCCCACCG

>CONTIG\_173\_length\_2717\_cov\_22.880695

GGTGATCGCCGGAGGCGTCTCGATGATCTTGGACGGCTTCGGATCGACCCAGGAGA  
AATCGCGAGCGCCCGCATCGACCAGCATATGGGTAAATGCGTCGGAAGCCATCGGGC  
GCCGGCATTTCCTCCAGTTGCTCGATGAGCTGGCCCAGCTCCATGCACTGCGGCGTG  
GGGATGGGAAGCTTGGCCTGCGCGGATCCAAGAAGGTGCGTCTTGACGGTGTAGGG  
GACGCCGTCCGACGTCACTCGGTGCGTACTTCCGGAGTGTCCGCGCGCAGTCCGTC  
GAAACGGCGCCGCGCGTAGGGTTGGACATGCACATTGGCGCCTTCGGTGGGAACGA  
CGGTCACCAGTTTGGGATCGAGCACAGCGAACTCGCTGGGCTTGAGCTTGACGACG  
ATGGTGTCGTCCGTCACCACGACCACGCGCCCATCGAAGGGTAGGGGATCGATGGC  
GAAGCCCAATGTCTGAAGACTGCGGCTGATCATCGAACACGCGGTACTTGAACGACC  
GCACGTTGCGAGGGACATGGCCTGCGACAAGCGAAGGCATCATGGATTTGACGAGG  
GAACGGTCCATGGGAAATCTCCTTGAGGAACAAACAAGGGATTCCCCGCCCGCAAG  
GGAGAGGTCCCCTTGTTGGGTGGCGTTGATGGACGCGGACGCGTCCTTGGAATGAAAC  
GACCTGTGCGGTTTCCCGCACTTGCAGCCTTGAAGGTCTCGGCTGCCTGGGCATGTG  
TCGGCAACGCCGACGAACATGGGGAAAGGATGGCCCTGGAGTGGGCTACCTGCTCG  
CAGGAAACGGCACGTTGCCGCACCCATATTCCTGCGCGACGGCAAGAAAAAAGCCC  
CTCGAAAGGGGCTGGTGGTGGGCAGGCCTAGTACACGAAGTAGTGTTTCGCGTTGAC  
GCGGGAAGAACACGTGCTTCCACGTGTCGCCGCTTGTGTTGCCACCGTCGAACACGA  
CCATTTTCGTAGTCATCAATGTCGGCGTCCACTAGGTCGGCGCTGGCGATTTGGCGCA  
TGTGCAGCGTGCCGCTCATGCGCGCGAACACCAGGATCTGGCCGATGGAGTCGTGC  
TGGTTCATGGCGTTGACGCAGGCTCCAAGCTGGTGCTCGAAGTCGGATGCGGTCGCT  
CACGGGCGTGTTCTGCTCTGACCGTCTTCCCTTAGTGCCGGCGGGCGCGTAGCGCTCTG  
GGCATGTTGCTGACCGAGTTCAGCGGAACATGGCGGCAGCGTCGCACCAGCCCCT  
CCGGCGGCCATGGGAAATCTGTACTGGCTCATCGCCCCATTGTGTCTGGGGTATTCG  
CTTCAGTTGTAATCCGGATAGTCCCGGCGCACCCGCTCTTCCACCGCCATAGCGAGC  
GGATGCGGCGGGCACTCGGGCAGCTTGCTCAGGATGGCCCACGGCGTGTCGATCAG

CAGATGGCCAGTATCGAAATGTGGCAGGCCGTCGCGCTGGCGCAGGGCCTGCACGG  
CAAGCAATTCGGCGGGGTAAACGCCATTGAAGCTTTCATCGAACTCATAGGTATTGC  
GCTCGGTACTGTCTTTGCTGCGGGTGATATGCCAGTCGGCCGCGGCCTGCATCGCGG  
TCTGGAACACCGCTGCGTCGGTGCTGCGCCACTGGTCGAGCACCGCCTGATACTCGG  
GGATCAGCGGATGCACCGGTTGGTAATGGGTGGGGATGCCGAAGGCCTGCGCGAAC  
AGGAAAATCAGGAAGGCGTCGTTGGTGCCCTTTGCCCCAACCCCTCGCGACGCCACTC  
GTCCGGCTTCAGGGCCTGGTCCTTGTGCGCGACCTGGATCAGGAAGCGGGCGCCGG  
CCTCGGTGGCGTCCCATTGCGAGAGCATCGCGGTGCTGCCACTTTCATGCTTGTCC  
CGAACGACAGCAACGGTTGCCGCTCGGTGGTCCAGGCCAGGGTTACGGCGGCTTCG  
AAACGAAATGCGATGGAGCGCATTGCCACTGCCCAGCGCAGCGGCTGGGCGAGTTC  
GTCCAGTCGGCCCTGGCCGCTGAGGGCGCAGGTTTGCATGGCGTAGGTGTGACCGG  
CTTGGCCTAAATCCAGCCAGACCTCGCCTTTCAGGATAACAGTTTGCGCCAGGCACC  
CTTCGATGCGTTCCAGATATTTGTCGCGCCTGCGATCCGTGGTGAGCGCCCACTCAA  
TCCATCTGTACAGGACTTGAATAGCTTCTTCAGCGAGGGATGCCATACTGGCAACT  
GTTTGTGCTCTTGCCTGCCGCCATTAACATCATCCTCGGGCCGCGCTGGGCTTGGTTC  
TGCTGTTCTGTTTCCTGGGCCAGCGCCTGTTGCTGATTGAGCTGCTGGACCTGAGCG  
AAGCTCTCGGACACCGGGCGCTGTGCGGCATGCTCCGCTTCGACGTGGACATGGAA  
ATCCGGGCCTTTCTCGCCGTGCGGCGAACTGACCGCGAAAACGCGTGGCGCATCGG  
CGCTGCCGCCAATGCGCACCGAATCCAGGGTCTTGACAGCGCGTCGGCTTTATACT  
CCTGCAGCAGGCTTGCGGCAATGTTGTGGCTCTGCCCCCTCGTTCCAGCGGCCGTCGC  
GCTGCACCGTGCGTAGCATCTTGTGCAACACCGCATGGTCCGGGTGGCCGGCATCGC  
CAGGGGTCAGCATGGTCTGTTTCGGTGCTGTGGGCTTGACCCATGGGTCAACCTTGC  
GTTCGATCTGCAGGTGCGGCGAGTCTGGGCTGCGACTCAGATTGAGCCGCGCCAC  
GTGACG

>CONTIG\_174\_length\_2709\_cov\_5.207591

GACATACACCCCATTCGCCGCGGAAACGCGCCCCACATTTGCGGGAACCCCGGACA  
AGTCGCCCCAGCTTTGATGGAACGACGGAAAAACCGCCCCGGTGTGAGTTGTATGT  
GGACAGCGCACTCTTGATGCTCCTACGCAGCACTCCCAATGCGTTTCCCACGCACT  
CAATGGTGATCTTCATTAGCGAGCTTCTATCGCTTCGCGGCGGCGTTGATCGCAGCG  
TGTGTGCGCTCTATAGAAAGCACAGGTTTCGTCTCTAGCCCTTTCACCAAGCCGGCG  
GCAGCATCCGCTGCCGCGATTGCTGTGCCCTCGCCTCCATCAACAAGATGGAGGGA  
AAACGTAGCCGTCCATACTTGAGGCACAGCCTGAGACAACAGCCATGATCGGTATTT  
CGGATCTCGGTAGACTGCGAGGTCATTCATGCAGCTTCTCTCTCCACACGGTACTGC  
TTGCGGTGGTTAGCTGAGGTGCGAATTCACTCGTGCCATAGCATCAACGCCCCATGC  
GGGGCATGGCACGCGACCGGTAGAAATATGCCATGCCACTCGCAGTGCCTCTGCAT  
CTACCAAGGCATGGTGTGCTCTGGACCTAATTGCAGGATGAGCCTCAAAGTAGGCTT  
CCACCAATGTGCGCATCGGCCTGTCGTGGATGATCTGCACATCCATTGGCCGAGGTG  
TCGGGCCGCGACGTAGAGACTTGGGTATCGGGTAGATCGAAGCCCGCGAGCACGTAG  
TGGAGAAGCTGGAGATCGTTGGCGTAGTCCGCAAAGATCATTGGAGCACTTGCGGC

GTTGAGAAAACCGCGTACGTGCATGGTCATGGCTTGATCGGTCAGGGCCGACTTGTC  
CCGATCCAGCAGCGGATAGACGACGCTGCGAACGAATTCAGTCGGACGCGCCGGCA  
AGATCTCTCGCTCGGCGTAGAGGTAGTCAATGCCGTTCTCCGCCACCAGGGCGATGC  
TGACGAGTTCAGAGCCTAGAGTGTCGGGCCCCACTCGGTATCTAGAAAAAAGCGCATC  
AATTAAGTGCCCGTGTAGAAGCAAGGCACAGTTCAACGCGTCATCCGCGACGACAC  
GAACAGGTGGTGCCCCCTGGCCGGGCTCGAACC GGCACTTGCCGCTTATCTGGCGCTG  
ACGGGATATAAATCCGCTGCTCTACCAATTGAGCTACAGGGGCGTGATCGTTGCGAT  
CACGCCGGTATTCTGAAAGTCGGGCTCGTAGCGGTCTGAGGCACTCATGGCTTGAGCA  
TACCATGCGCTTGTTGTCTAACGTGCTGCGCGGCGCGGCTTGCGTGCCGCCGGTGCG  
GCCGACTTCTGGCGTGACGTGGGCCTCGCTGAGACGGTACGTTGTAACCTCCGCTGCC  
AGGGTGTCGGCTCGAGCTCGCTCGACGGCAGCTTCTCGTAGCGCCTCAGCCAACGCC  
TGACGGGTACTCTCTTCATGCTGGCGAGCGTGCTGTTCAAACGTCTGACGCTCCCGT  
TGTGCGCTCGTAAGCTGCTTTAGAAGTGCCTGAGCTTCCTGCCGTGCCCGATCGATTT  
CTGCGTGCGCTCTATCTTCAATTGCACGCACGTGGTTCGGCCTGACGATTGCGCTCGA  
TGGTGATCACTGCCTCACGCTCGCTGTAGCGGCCCTGCAGCGCACCAAGCTCTTGTT  
CCATCTGGGTGCAGCGGTACGCAAGTCCTCGCGTTGCGTGGTTCAGGTCGCCAATTT  
GAGTAAGCTGTTGATCGCACAAGCGCTGGAGATCGGCCAGCCGCTGTTTCGGCGACA  
ACCAGCGACTGCCGAGCTTGGTAGCAGCAACGGAATACTGATGAATTTGCGCTTGC  
CAAGAAGCCTCCCGATTGCCTAAGTCATCTTGAGTGCAACGAGGTCGGCACGCTGT  
TGAGCCAGGTTGGCGTCAGCGTGCGCTGTGCGGCTGCCAGCGCATGCTCCCACCAC  
TGTGAGGCCAAGGTCGCTAGCTCCTCAGGGGCATTGGGTAGCTCAAGTTTGACCTGC  
TGCACGATCAGCCGCTCACCCAATCTTCCCCACCAGGTTTCCAGCCAGCGAACCACG  
GTGTTTGGCGAGCCAGTGCCAAGATGAGCACGGATGCGTTCCACGGTCGGGCGTTC  
GCCAAGCGCGACAAGCGCGTCGGCGGCGCCGTGAACATCTGATTCTGTGATGCCTCT  
GGCCATTGAAGTGCCTCCCTGATTGGCGCCCTGCCCTGCAGTTGACGTA CTGCGAT  
AAGTGATGATTATCACTAGTACGCGCCCTATTTTCATAACGTACATTACATAGTATGA  
AGCGAAATAGCACATTAGCCACGGTGGCAGCGACGGCCGCGAGCCTGGTGCTCCCC  
GAGCAGCTGGCCCAACAGGCCGCCGACGCAGTGCGTGAACTGCTCGCCGAAGCGGC  
GGCGGCCAACACCACCCGCAGCTACGCCACCGCCCTGCGCTACTGGGCGCGGCTGGC  
ACCAGACCCGCTATGGCGTTGAACTAGCCTTGCCGGCGAGCGAGGCCGTGGTGATC  
CAGTTCCTGGTCGACCACATCCAGCGCAAGAACAAGACCGGCCTGGTCTGCGAGCT  
TCCGCCGGCGATCGACCAGGCGCTGGTGGCCGCTGGCCTCAAGGCCAAGATCGGGC  
CACTGAAGCTGTCAACCGTGGTCCAGCGTGTGGCTGTGCTGTCCACGGCGCATAAGC  
TCAAGCGCTTGGCCAACCCGTGCGAGCTGCCCAGTGTCCGTACCC

>CONTIG\_175\_length\_2699\_cov\_134.473561

GGTCTATCGTCTCGGCATTCAGCCCGAACGTCGGCCTGGCGACGCTCCCCACGCAGC  
CGGCGCAGTTCAGCCAGACCACGGGGCGGCTGTTGAACGTGCTGCGCTTCGATGCG  
TCGGGAACCTACACCCCGTCGCCGCTGGCTAAGTACGTCATCGTCGAGGCGGTTCGT  
GGCGGTGGCGCCGGTGGCGGCACCGTAGCAGCTGGCGCCGGTACCGCTGCAGCCGG

GGGCGGTGGCGGGCGCCGGTGCGTACTTCCGTACGCGCGTGGTGGTGGACTTTTCCTC  
GATCGCGGTCACTGTAGGTGTGGGTGGCACGGCGGCGATGGGCGCTGCTGGCAGCA  
ACGGCTCTGCATCGACCTTCGGCACGGCCTCGGCACCTGGCGGCTCGCCTGGCGGCC  
TCGGCACGGCTGCTAACGCATTCCCGGCGCTTGGCGCAGCGGGCAGCGGCTCGAAC  
ATCGCCACCGGTGCTAATCTGGTGGTGGCTGCGGGCTCGGTTCGGTAACTACTCACTG  
CTGCTATCCGCAACGCAGGGCATCAGCGGCTCGGGCGGTCCGTCCGTGTACGGTGG  
CGGCGGTGGCTTCCCGCAGACCGGCTCCGCGGCTGGTAACAGCTTCCAGGCTCGG  
ACGCCGTCGTGCCGGGTGCCGGTGGGGGCGGCGCGTTGTCGCTGTGGGCAGCTCG  
GCGCGCGCTGGCGGCACCGGGGGCCGCGGTGTGGTGTCTACGAATACGCGTA  
ACACGTAGCGACCAAACACAAAACCCGCCGAAAGGCGGGTTTTGTGTTTGGTGCTC  
AACGCCAGCGGTTAGGCTTGGTCGCGTTCGGCCTGCGTCAATGCGGCCTGCAGAATC  
TCGGCATCGGACGCATTGGGGTCGACCAGTACCTGCAGCTCGGAACGATCGCCTTCG  
GCGAGTTCGCCCATAGCGTCGCGTTCGTTGGCACGGCGGTTGATGATAATGATGACT  
GCGGCAGCTGCCATGACTTACTTCCTAGCAAGTGAGAGAAGCTTGTCAATATACGCC  
TGTTGAATCTGCGTAGTTTGGCGAAGTTCGCGCACCTCGGCACGCGTATCGCTGACA  
TTCATCGCCATCACGACCATGAGAACGACGCACACGACCGTAGCGGTGACGCAGAT  
CCAGATGCCGAAGCCGCCGGCGTTGATGTTGACGTGCGCGACGCCATTACCCGAAG  
CCCGCGCGCCTTGGCGGTTCGCGGTACGCGTCCAGGCGCTCTAGGAGCTTGGCTACGT  
CGTTGTTTCGGCTCATCCATAGCGCAAGGTTTCCTTCAAGGCGGTTCGAGTAGAGTATTG  
ATGCGCTGCACGAGCGCCGCAGTCGGCTCGTCGCGCTCTAGCGCCGTGCGTAGTTCT  
GCAAGCGCTTGTTCCAATGAGGTGCGCAAGGCTGCAACGTCTAGCTGCTGCACGGC  
CAGGCGCTCTAGGGCGATGACTAGGCGTGGCACGACACGGGGCAGTTTCATCGGCAC  
GGTCGCGCATCGGCGCGCTGATCGCGCGCCGCCCTTCGGCGATCAGCGCGCCTAGGT  
CTGCCAGCGACGGTCGGCCAGAGCCGCGCCACTTGCCTCCATGCGTTCGAAGTCCG  
CCATGCGACGGATAAAGCGCCGCCAGGGCGCGTGGCGGCCGGCGAAGCAGTAGAT  
GCCGAAGATGCCCCACATCAGGAGCGCGCCGCGCCAGGTGTAGATGTTCCCGCCAG  
CGATGACACCCATTGCCATCATGAACGACAGAAACGTGGTCAGCAGGTAGGACAGG  
CCGAGGGCGAAGCCGATCCAGCCAGCCATGTGCGCATTGCGGTACGTGCGGGGG  
ACGCATGTCGCCGAGCCCGTAGAACGCCGTTACCCAGACGCCGATCAGCGGCGGGA  
CGGCTGCCCACGACTCCGGGTGGATCTGATAACCGCTGACGTGCAACTGCTGATACA  
GATCACTCATCATTTTTCTTGCTCCGTGCAGCAAAGCGGGACTTGACCCAGTCCATC  
GCCCACGGCGTCCACGTCTGGGAGGTTAGTGCCAAGCCCATGCCCATTACGGCTTGG  
TAACCCATGTTCGTCCCATGTGTAGCTCGTCCAGCGCGGAATGCCAACCACCGCAACG  
AGCGTCATGATAAACGAAATGGCGAAAGCGCTCAGTAAGTTACCTTGTGCTCGAC  
GCGCTGGTTCCAGACACCGACAAACGCGCCGAAAGCGATAGCCATCAGCACGTAA  
AGGGGGCCCCGAGCCCCACGTCTAGATGAATCCATGGTGTATTAGGTGAGGCTACG  
GGCGTCGAGGTGACCGCCGTTGCGATGACCAGAGCCGCTAGTGTGTTGAATCCGGTC  
ACGTGCGGCGCACCTGCCTGAATTAGGTACACAGGATACCAAACCACTGCTGCGAGG  
CGGACAAACGCGTCCGCAGAATCATGAACACCATGTCAGGGCTTGCCACGCGCAGG  
GCCGCTAACCATCGAGGCGAATAGCGCTTTCGCTTTGGCCAGCTTGGCGCGTCGATC

TTCCAGGCCGTTGGTGCCACCATTGATCGCCTTGGTCACGCCGACGAGGTCGTGGC  
CAGCGCAAGCGCCTTGAGCTTTGGACGCCGTACGGTCCAGTACCAGAACGCCGCAT  
CGACGGCATCGGGCAGCTTGGCCAACATCTCGGGGTTGGTCACGCACCGCAGGTCG  
CCATACTTCCACTTGCTATAGGCGGTGTAGTTGGCCCGTCCAGTGC

>CONTIG\_176\_length\_2694\_cov\_6.209973

CCTCAGCTTCGTCCTAGTCGTTGATGGGCTTCGGATGTGTTAACAGGCCCTAGTTCCT  
GCTGCAAGCCCTGCATTTTCGGTGC GGACCAGCGCGCGCAAACGCTCATCGAGTAGA  
TCACGAGAAAAGTGAAGTCCAGGTGCAACAGCGGCATCGTCTTTGCTCGA  
AAAAGCGACCACGAGTGAGTCGCCCTCCACCCGCATTTCTACGTCGTAAATGCCCGT  
GTAGCGGTGAGCTGTTTCGAGCTACCACTTCATCGCTGTATAGGCTGCGATCAACAAA  
ATAATGCGAGCGTTCCATTGCTCATCCCCCTTTGGATAAGTAACGTTAGCCTTAAGG  
CGTCTTTGGTTGCAAGTCGCTAGCGGCGCTGTCTAGTTGTTCTGAGCGAACTCAAG  
CGGGTTTGTGTTGGCTAATCTAAGCGAACGCTAGTGCATTCGTTGTCAGATTTTTGAAG  
AGTGCAGCGTCACCCGTCCTGAGTAGCAGTCGGATTTTAAGGGCATCGCAGCCACC  
GAGCCTTGATTAGAGCCTGAAGATGCTCTACATCGGTCTTCAAAATCTACTGAGTTC  
CCACCATGGTCAAAGCTCGCAATAAAGGTGATGAACGTCCGCCACTTATCGAGGCA  
GCGGGAGGTGATCTTCTGATGTCCAAGCAGATTGAGCCGCTTAAAGAAGAACAAC  
GGCGAAGCTTCGTAAGCTTGCTACTTACGACGTCTCCACATACTCCGAGGCAGATGT  
TCGGGCAGTCATCATTGATCCTGTGGTGGAGATTCTTGGTTACGAGAAGGAGCAGCA  
CTTCTCAGTAAATCGGGAAAAACACCTGAAGGTCCTTGATGCGGACCTTTTCGTTGA  
CTATGAGCTGTTGCTCTGGCAGGAGTCTTTCTGGGTCAATTGAGGCCAAGAAGGTAAT  
GCGCAAGAAGCTGAAGTTCCACAAGGACGAGCTGCTCCAGACGCTCGCCTATGCCG  
CCCATCCCGCGATCAATGCCGCCTTGATGGTCCCTGTGCGATGGGCGTGTGTTTGAGA  
TATACGACCGAGAACAGAGTCTTACCAATCCTATAGAGCGCGTGGAAGTTGCCAAG  
CTTGCAGAAGACTTTGAAAAGCTTCAACGCTACCTTGCACCTTGGCAGGCTTGGTTC  
TTTCAAAAGCGTCGAGTTCCTCGCTTTGTAGCCAAAGTCATGAACCGTGAAATGACG  
GCCGGTCGTATCGATGATCTCCGTGCGATCATCAACAGGCAATTTGACCTTGACAA  
GATGTCGCTCGCGAGAATCGGCGCCAGCTGCTTGCCGGAAGGATCAAGCCAAGGA  
GCGCCGGGACTACTTCGCGTCGTTAGAGTTGCCCCGATCTCGTTGAGCACCTGATGTT  
CGACATGCGCCCTCACGGAGACATCAATACGATCGTTAAGGCGGCTGTAGACAAGG  
GTGGCATCTATGGGCAGCAAGCGCTTCTGAGAATTTTTGACGACCGCCACGCAACA  
TCAACGATGCGTTTATCTGCTACTCCCTGAGAATTCTCATTGAATACGAAAGCAGGC  
CCATTAAGCCTTCTTGGCTGCCTCATTGGCTGCTCCGAGGAACGCAGTCGCCAGATT  
TGGAGGCGGCGATCAAGAATTTGATCAGACTGTCGTTGACCTCATTTTCAGAAGACA  
AACCACGTCAGATCGTGCTGCAATACTCTGCTTCCGTCCGGCGCTTGGCGAAGATCA  
TCCTGGCAATCGTGCCAGCAGCCAGCACTGTTGGCACCTACAATCATCAACAGATCC  
GCCACATTGTTGACGAGCTCAATGATTTGCAGATGTTGACGTCTCTGAAAGAGAGA  
GCCTGATCTCGTTGGACAGGATGCAGCACCTGTTGACCAATCAGTTCGTATACAAGC  
ATCGCGACGATCGCGGTGGATTTGACCTCGCCGGTGCGCTGACTGCACTCAAGGAC

ATTTGGGCTACGGAAAAGATGCTTCTTGGCGATGGGACGGGATACAAGACCGCGCT  
CAAGGGCAGAGGGCTTGATAACGAGCTCCATCCGACCGAGTTCAACTGGGTCGCCT  
ACGACAACTTGGGGCATAACCGCTCTCTGCGCTCTTCAACATAACCAGAAGTGGGCGC  
ACTACATCCAGGCCAATCATCGCGACGAACTGCTAGTTATTGCGAGAATGGGTTCCT  
GGCGTGCGCGAGAAATGCTCGGCGAAGGAGTAGATCTCACGGACCTTAGCGACCAG  
CACTACGCTGATCGCTTCTTCCATGGCGCCCTCGCGATCTATCAGAGCCTGCGCACT  
GGATACAATGCCCCGCTCTACCGTCTAGCCACCGTTCTGCACGAAAGGTCTAGGCTCC  
CTAGGATGATTCCATGGAGCACTTCCGGCGAAGGTGGTCTCGTTAGGAACGTTGTCC  
ACATCACCGAGCTTGGCAAAAATGCCGCAAGGCCGGGATCTCATGCAACACTTCCAT  
CGCCGGACGCTCAGCGCATAACCACTGCTGCAAAAAGTCGCTCATATGTGGTGTGTTGT  
TCAGAGGTTTCGTGATTTGCAATGAAGACATCTTCGGTCGCAGCAGAGGTCGTTCAA  
GTCGAGGGTTGAGCTGCCTACCTCCTATCCAACAACCTCTGCGATTAGCTGATCTCGA  
ACCTTGGGTTGAAGATTCGTCAGTGTGCTAGGACCTTCGCCAGTTGGTCCTGCTGT  
CGATCGCTTTGCTCTCCCAACGCCAAGA

>CONTIG\_177\_length\_2667\_cov\_21.550394

CCGCGAGGCGTTGATCAGACGTTGGCCGATGGAACCTGTTTCACGGTGGTTGGACCG  
CTTGCGCACATTGCCGGAAGCCGTGCGCGCGCAGATGACGTTGGTGCTGTAAAACGT  
GGGGATACCTTAGTACCTGCCATCTTTGTCAAAATTCCAGATGGGGTTCTCTTTCCGG  
GAAACCCCTCCCTCCGGACAGTCATCGCAGTGTCCAATTCGGCTGCGATTGAATCCT  
CCAGCATTACCATATTGAAGTCGGGGGCGAGCCATAAATTACGCTGTAAATGATATG  
CCAGTGCGGTCAATTCGTGATTGACAGATAGCTTACCTGTCGCTGCCGCGCGCAGAC  
GAACGTAGCTCAGAAACCGAAGTGGCGTATCGAGCATTTTCGGCGAGGACGTCGAGT  
AGAAAAACGTCCATTACAAACGGCGGGCTGAATCACATCTGTGCTTTGATGCTTCAGG  
AATTGGCTTGCTTGGAATGCCAAGGCGGGGTAGTGGTCCGAAACCACGCAGAATGG  
AGAAATTTCTTTGATTGACTCAGGTAGTTTGACTTCTCGACCCTGATCATCAACCAG  
GCGGCAATTGCCAGTGAGGATTGCATTAGCGCATTCCAACCTTGGTCATAAGCCTT  
CTGGATGGCCGCGAGCAAAATCACTTTTCAGTTGACCATCGTTTCCTTTGCGAGCTGC  
CAGAGTCAGCTTTTTCGCCTTAGCTTGAACGATGATAATACGGTCACCAAAGACGAC  
TAGAACATCAGCTTCTCCGACGATGTCTTTCCCTTGGTAAATATTGACGTTTGCATGG  
ACGCTCGCCTGACCAAAAACCGCAGCCAGCCTCCTAGAGGAGAATTTCTCTGCAAA  
GGCCCCGCGTTGTCCATCGCAGTTTGCTTGTAAGCTTTATCATTCCACATCCAGAA  
GAAAGGCGACTCGTACAGCGCTTCATAGATGGAGTAATGCTGAAAGAGCAACACTG  
ATCCTCGGTCGGTGGGCGAGCAAGGGGGTGGCCGCCACAGCATTGAAGTCCCCAAGC  
TCGTTAAACTGAGAATTACCGGTCGTGAGCGTCATTGCCATGAAAATCGCCTGAACG  
ACCTCTATGCTTTGGCGGCTTCGTTGAGCTATCTCTTCTGGTGTGAATTCAAAGTGGG  
ATAGCAAAGAAAGTGAGCGCTGCCCCGCTTGTGCGATTTTTGGCAAAGGTGGCCGTA  
GCCCTCTCATCCATAAGCGAACACATAGTGCGCGCTACTTGCTTTGCTTGTGCACTTG  
TAAAGCCCATGTTTTCTGAAGCCAGTTATCGTCTGGGCGATGCTTTTCTAGGAACA  
AATCACGATATTGGAAGGAGTACGCAGACTCGGAGCCGTAGAAGATTGGTTCCCGC

ATCATTGAGCCGCTCCATATATCGCTCGGATCCTTTCCGTCACGCAAATTTCCGATCA  
TCGATTCTGAACATCGGGCGGTTTCAGCGCATCATGCAGCTCCTTCATCAGTTCGTCGG  
TACGGGATATGTGAGCCTGCATTGTCTCCGCCGTTGGAAGCGTGAGGTCAAGGGGCT  
GTCGCATCATCAAACCCAGTAACGTATTGATCTCAGTCCTTATGAGGCGCTCATAAT  
TAAACATGTGGCTCAGGTCAGATGCCTTGTACTCACCTGCGTAAACTACGAGGTCGT  
CTCGATGGCAAATTTGTGCAATCGCGTGGATGTAACCTGGCTGTGCCGTTAGAATAG  
CGAGATCCGCGAACACGTCAGCTTCAGAACGACCAGTAAAATTCATGCTTCCTTTCT  
CCCAGGGGACAGTAGTTTTATGAGCTGACTCTATACGTTTGCAATCATCAAGCTGGC  
ACTGAGCACCGACCTAACAAATGACATCATCTTAGGTGGCATCTGTCATGACAGTCA  
CGTTGCACTGCACTTTATGCGGTCTATGGCAGTGATTGAACGCTTCCTGGCTCACAG  
CAGATTTACCTGAAACAGAACGTCAGAAAGATTTCTTATGGGCCACACGAAGTCGCTT  
ATAGGCTTCCAGGTGGCAATGAGTCCGCCCTTACGCTGTAGACATCTGCGAGCGGCT  
GCAAATGGTCGGAGGGCGGTCGTTCTTGAACGTCTGCTATTGGCCGATTCTGTTGAAA  
AGTCGGATCACTTGAATTCTCCGGAGGCTGAGCGGTGAAGGGGTCTGCTTTCGGGGT  
GCTACGTGAAATCTGTATCCAAATACCTATGTAGCCATTTGAGATTTCAATCTCATG  
CGCTTACTTTTCTGACCTGAGAACCGCAGCCGACTTTTGCAACAGAATCGGCCGATT  
TCTTCCGGTCAGGGTCGGCCAGCGGACTGGTCAAATCCGATGCAAACGACTGGTCA  
AGTCGAATGCAAAAGGCTGGTCAAGTCCATGCAATTACTCACAGTAAAGCGAAAAG  
TCCATCCCGCTATGCTGCGGTGAAAGCCCATTACTCGTGGGCCCGAATATCCTGAAG  
CGGTAGTAGATCCATGACATCGCAAAACAGTGGGCGATGCTTCCAGTCATTTCTGTC  
GCCAATCACATAGAGGCGCCGCTTGGCGCGCGTCGCCGCCACGTTTAGCAGATTTGG  
TTCCGAAACAGCCCAGTTGCGAGCGCCAGATCCTGCCGTGTTACCGCCCAATACGAC  
AATGACGACCGATGCTTCTTTGCCTTGCATTGTGTGGATGGTGCCGGAC

>CONTIG\_178\_length\_2648\_cov\_12.696549

ACTTTCAGCTGAGCCCGATCGCTGGGCAGGATCTTTTGGCGACGGTGGCCACCGCCG  
CCGTGCCGGTCGGCGTCTTGGCCGGCTTGGCGGGTTTAGCCTGGCGCTGGAGCTTGT  
CCAGCGCCTTGAGCGCGTCCGGCCGCCCTCGGCGGTAGATCTTGGGCGCGCGCGCAT  
AGTTGGCCGGCAGCACCTCGAACACGGTCACGCCCAGCGCCAGCAGCTGGGAGGCG  
GCGGTGTGAGGCTGGCAAACACGCGCGGGGTGCCGCGCTGGCCGGTCAGTTACAT  
TTCCAGGGGAAAAGCCCTTTGGAACCTGGCAGTAGGAAAAGGAAAACAGGGGTTGGA  
AAGGTAAGCCTTGTTTTCAACCTGCTGAACAGGCAGGATCGGCGTTCTGTTTAAACA  
TGCAATGGGTGAAACATGGCTCGCACGCTGAAAGACATCGCTGCTGAAAAAGCCAAG  
GCGCAGGCACTTCTGGTAAAGCTGGAGCAAGAGGCCAAAGACATGGCCAAGGCCG  
AAGCCACGAAACGCTTTCCCGAAGTGGTGGAGTTCTTGAGCACCTACGCAGAGCAC  
TACACGACGCAGCAAAAGCGGGAGCTGGGCGCGCTGCTGGGGTTTGTGAGAAGAA  
AGCCGGGAAGGTGGGCGGAACGGCGACTCGGGCACCGAAATATCAGATCGCCGAC  
GGCACGACCTGGGCAGGAAATGGCAAGCATCCGACCAAGTTTTTGAACCTGGCTCGC  
GACGGCCGAAGGCAAGGCTTGGCAGAAGAAGCACCCGAACGAAAAATATCCCGCA  
TACCCTTACACGCCGGATTGATCGGGGCGATGGGTGAAATGGAGCCCCGGGAAAC

CGGGGCTTTTTTTGGGGCGAGAGGTTGGAGGCGAAGAGCAAGAGCGGCTAAAGCAA  
AGAGCCGGCGGCGCTGCCGCCGTGTCGTGGGAGAAAAGAAAAGGAAAAGCTGCAG  
CGGCGTCCGCCGTGCTCTTGGCTTTGCTGGAAATGTGAAGTGCTTCAAAATTTTCTCA  
AATCTGCTTTTCCGCCATCAGTTTTAACTTAGTCGGAAAATGATCGGATAAACCTA  
TTGCGGATTATTTTGGATGTCATAACCTGAATGTGTAGAGAGGGAATGCCTTCCACT  
CGATCATCAATCATTATTAGGAAAAAGACATGCACATTCACACTCTCGCAACCGACG  
GAACCCAAGTCATCGCTATTACCCAAGCCGCGTCTAGCGGTGGCGGGGAGTATGGG  
CATCCCGTCATGCTTTCAGCGATTTCGTTTCGACTTGGCTTTATTCGACCAGGCGATTG  
AAGAGTTGAGTAAGAAAGGCCATCGCCATGCGAAGAGCTTCGAGGTGATCGAGCGC  
TGGAAGGTGGACTCCCGGAATCAGGGGCCTCGCTCCCGCTTCGGCAAGACCTTGGCT  
GCCCTGCGCGATGAAGTCGGTGACAACCTTGAATGGCAAAGTGCTGTTTTCGACAGA  
CGATGACGCGGATGACGCGGTGGAATCGTTTAAGCCCATGGTTCGCGCCGTTCGGCCT  
TGATGACATCCTGCCAGCCGCCAGCGCCGAAATAGCTCGGGCGCGCTTCTAATGGCC  
CATCACACGCCAGCCCCATGCAGCTCGAGTGGGGCGCCCGGGTCCCCGCGTCGCA  
TGTCGAAGTGGGGGATGAGCTAACTGTCGTCACGAAGAGCGGGAGTAGCTGGGAAG  
CAGTCGTGCAAGGCGTGGTCTGGCAGGGGTTTCGAAGTTGCGCTTTGCCGAACCACCA  
AAGCCAACCCTGGCCGTTGCACGGCGTGTGGTCGCCGGGCCGTGGATGCCCCGCAC  
CATGCCGCAATGGGTGGGCTTTGTGGGGAGTGCGCGTTTGACGAATACGACATGTG  
AGGCACCCATGGCAGAGCGCCGCCGCGCTACTTCGCCTACGAGCGCCGCTCCGGG  
TCCACGTGCTACTTCGACAAGGACATGCACGCCACCTGCAGCGCTACCCGCACACC  
ATTCCCCACTTCCAGCTGACCCGGTGCTGGGCACGTCCGCACTGCTGACTGCACAA  
GAGGCCGCGGCCATGTCCTGGTTGCTCAAGCCCTCCATGAGGACCCCATGACTCGTT  
ACATACTCCACCCGAAAAAGAAGACCGAGCGCTCGGTGCACCAGATCCACGAGACC  
CGGATCGACCCAGCCAGCAAGCAGGCTTTCAGGCCCTGGCAGCAGCGCAGGGCTT  
GAGCATGCGCGCAGCGCTCACGCAGCTCGTGGAGCAGCATGCGGTGATTCGGGAGC  
CCTTTACAGCCCGCCAGCCGAGGGGAGAAAGAGCGCATTACACGGCGATGCTTCCA  
GAGGTTGAGGTTTCCCCCGACGTGGCCCTCGCGCTGCTGATCGACGCCAACCAGGCC  
GGGATTCGGATGACAGAAGGCATTCGGCAGTTGGTCTGGCGAGTGTGTCCAGGCTA  
GCGGTTGAGCGGTATGGGGTGAGCGGGGACTGGGCGGCGATGCCGCCTTTTTTGTGC  
CCGACGGTTCGCAAAGGTGAGGCAGAAAAAGGGGCAGGAGCCTAAGGTATCCCCA  
CGTTTTACAGCACCAACGTCATCTGCGCGCGCACGGCTTCCGGCAATGTGCGCAAGC  
GGTCCAACCACCGTGAAACAGGTTCCATCGGCCAACGTCTGATCAACGCCTCGCGG

>CONTIG\_179\_length\_2612\_cov\_79.856740

AAGCTGGCCCCGCTGGTGTTCGTGCGCCCCGGCGAACTGCGCGCGGCGGAATGGGA  
CGAAATTGACCTGGACGCCGCTGTGTGGCGCATCCGGCCCCGAGCGCATGAAGATGA  
AAGTTGCGCATCTGGTGCCCCTGTCCAGTCAGGCGGTGGCGATCCTGCGCGACCTGC  
ATGCCCTGACCGGTGGCGGCCAGCATGTGTTTCCAGGCCTGCGCCCCATGCGCCCCA  
TGTCGGAAAACACCATCAATGCCGCCCTGCGCGCGCTGGGCTATTCGGGCGACGAG  
ATGACCGGCCACGGCTTCCGCAGCATGGCGGCCACAAGGCTCAACGAAATGGGCTG

GAACGCCGATGCCATTGAACGGCAACTGGCGCACGCCGAAACCAACAAGGTGCGCG  
AGGCATACACGCATGCTGCGCAGTACCTTTCCGAGCGCACCCGCATGATGCAGGCA  
TGGGCCGACTATCTGGACGGCCTGCGCGCTGGCGGTAACGTCGTGCCGCTGCGGGC  
CAAGGCAGGCTGAGCTTTCACCGAACAACCGCACATAGCCCGACGGGGCGAAAAGC  
CGGATACCCTGCCGGCCTGGTGCGGGGACTATTTTCAGGGGGCGCAAGGGTGCGCCAT  
GTCGACTACCGAAGTGCAGCTGCAAAGCCAGCTACATACACGAATTAGCAATTTAT  
GTGAGTGGCTTTCAGGTGCGCTAGAGATAGCGGAGATGCGCAGAGTCGAATCTGTA  
ACGCTCGCAAAAAAAAAAACTTGTATATGTGGCTCTGCGAAACTTGGGATCGGAACGA  
CGGAGATACGGAAGGCGCGCTAGCCTATGCACTGGAATGCTATGTGGACTGCTTAC  
CGGGGTGGGCAGATGACAAAGCTTCGTTCTGAAGCTGATCTTTCCATGGGCGCAGATC  
CGCCTTGGGAGCTGAGCGAATTTTCATCTGTTGGTTCGCGTCATTCTTAGCCGATCAGG  
CACTTTTTCGATTCAATCGCGGAACGAAGAAGCAGCGACTCCTCGCCGCCATGCTCT  
ACGCCGACGCTGTTGATTGCCGAGAGCACTGGAGCCAGCTACGCGGGCCTGCTGGT  
GCCCCGAAATCCTGAGACCAAAGTAGGCAAATACCACGCTGTAATGAGGTCAATGGA  
AGAAAGAATTGCTGGCGATAAAGAGCAGAGAAGCCGCGCCAAGAAGGCAATCGCC  
GCGAAACTCAGAAAGGATCCAAAGCAAGCAGCAAAGTCTCAGGCGCTCAAGATTTG  
GCAGGACTGGCAGTCTGGAAGGGCCATCCATGCCTCCGGGGCTGCATTCGCGCGCC  
ATGTGGTGGAAACAAGTCTATTGATGACCCGAATACGGTGCAACGGTGGATTAGG  
CAGTGGCGAAAAGTAGGCGCATCCGGTAGCGCCTAGGCTGTACGAGTACGACCGTT  
GAACGCTCGTCCAAGGTGTATCTAATAGGCATCGCCCGGCCCAATGGCGGGCCGCAA  
CTAGGCGATACCATGCATCACATTTCACTCCCCGAAACGGGCTTTCTGCGACTCCCC  
CAGATCGTCGGCCGCGCTGCCGACCCCAAGACCAACACCATCGCCATCCCGGCCCT  
GTTTCCCGTATCCCGGTCCACCTGGTGGGCTGGTGTGCGCTCCGGCCGCTATCCGCA  
GCCCGTTAAGCTGGGCGAACGCTGTACCGCTTGGCGGGTCGAGGACATCCGCGCGC  
TGATCGAGACTGCCGGCAAGGAGGTAGCTCCATGAGCCGGAACAGCACCCATACCC  
CGGGCACTAAAATCGCGCCCGAGGTAAGCATCATCGATACTTCCGCCTCCGCCCAAC  
GCGCGCGCCTGCTAGCTGCGCTGCGGCGCGGACCGGTGACGACACTGGATGCCCGG  
CGAGACTTGAACGTGTTTCGTGCCCCGGCGTCCGCGTATTCGAGTTGCGGCAGGAGGG  
GCACCCCATCGTGACGCGCCTGATTTCGTTGCTGGATGACCAAGGACGGCCACATA  
GCCGCGTAGCGCAGTACGCGATGCAATGGGAGGTGGCTGATGCAATCCCCTGAGAA  
ACAACGCAGCCCGCGCGAGGCGGGCCACGGCGCACATGCTGGTAGGCTGGGTGCGA  
GTCGAGACTACACGATGGCGGGCGGCCTTGTATCTGGCGTCGGTGGCCATGGAGGCG  
GCGCAGGCCCAGCTTGAAGCATGGGCACGCCTGACCGACGAGCCACACTGGGCCGT  
CGTGGATGCGGCCGATCTGTTGAATGCAGCACGCGCTGTGCTGGAGGGTTCCCGGTG  
AGCCGGCCTTGTTTCGACGGTGTTGGGAGCGTCCACCGCGCGCTTGGCGCCATACGG  
GGAGGCACCCGATGAGCGCCAGGAAACGGGAACGCTTCAAAGGCCGCAAGTCGGG  
CGGTGCATTTTTCCGGGTAGTGTGCAAGTGCTGGAAAGTCCGGCGTTCTGCGGCCT  
CTCCATGAAGGCGCGCGCGCTCCTGCTGGATTTGGGTGCGCAATTCAACGGCTACAA  
CAACGGGGACCAGAGCGCGGCGTGGTCGGTTATGCACAAGCGTGGTTGGAAGTCCA

AGGACACGCTACGCAAGGCGTTGTTGGAGCTGCTGGATGCTGGATTGATCGAGCAG  
ACCCGGCAAGGCGGCCTGCACTGGTG

>CONTIG\_180\_length\_2612\_cov\_41.812072

AGCTCCACCAGCATCTGATTGCCGAAGTGCACGTTGCGCACCTCGTTGCGCAGCGAT  
CGCAGCTCCTTCAAGACCAGCATTTCTTCGGCTTTGGCGTGTTCGGGGTCGTAACGC  
TCGGCCAGCGCGGCCTCCACTACAGCGCGCAACGGGATGCGCCGCTCGGCGGCTTC  
GCGTTTTGCGAGCTGCATGAGCCGTGTTTCGACTTGGGTGTGCAGGATGGTCTTACC  
GTCAGATTTCTTCATGGGAGCATGTAGTCAATGTCGTCGTCGGCTGCATCCATGCCA  
TCGGCTTTGGCGGCGGGGCTGACGGTGATTTTCATGGGTGTGCATATCGGCATCGGCG  
CCGATGTCGTCATCGGGCATGGGCGCGGCTTCGACAGCCGCCTCCGGTGCGGGCGTC  
GGCTCAGGGGTGGCGTCCAGGTCGCGGGAGTCTTGACGGCCGGTTGCAGGGCGGC  
CGCCACCGCAACCGGCACCACAGCGGGGGTGAGCTTGGTCCACGGGTGCCGGCGA  
CTGGCGGCCCCGTAGGGGTATGGCCTGGCTGCGGTGTTGGCGACTGGCGCGTACTTGT  
GCTTCGGGTCCAACACCTTGCCGCGCTCATCGGTGCGCGGCACCAGGTCGCGGAACT  
TGGCATCGCTGTAATACTTGATCTTGACCGCCATGATCGGCGGCAGGCCTGCGACCA  
CGATGATCTTCTTGGTCGGGTCCATTTCCCGCACCTCGCCTGGCGTCATCAAGGCGC  
GTGCTGATTCCTGGTTGGACACCATCACGTGGCCCAGCCAGCCAGACAACCGCCCTC  
CGGTGTAGTTGGTCTGCTGGTGAATCTCGGTGTCATCCCGAGCGAATCGCTGATGC  
GCTTGGCCGTCTCGTCGGTGTTGGGCGCATACCACACGTGGATGTGCGCACCGTCCA  
TGACGGTATTACTCGGCCCCGTAATATTTACGATTTGGTTATAGCTCTGGTTGATCAT  
CATGCACTTGATGCCATAGCCGGCGACGTAGCCCAGACCTTCCTCAAAGAACTCCAA  
TTTCCCCAAGGACGGGAACTCATCGACCAGCAACAGCAGCCGGTGCTTGTTGCCCTC  
CGGGTGCAGTTCTTCGGTGAGCCGGCGGGTGATCTGTTGCAGCATCAAGCGGAACA  
ACGGCCGCAAGCGTGATTTGTCGCTCGGCGGGCTGATCAGATACAGCGACAGCGGG  
TATTTGGCGCGCATCAGGTGCGTGATGCGAAAGTCGCTTTCGCTGGTCGCGGCACCC  
ACGATGGGGTCGTAGTAGAGGTTGAAGAAGCTGCGCGCCGTCGAATGCACACCGCT  
GCGCTCGTTGGCGCTCTTGTTGAGCATGGCCCTTGCTCCGATCGCAACGACCGGATG  
CACCTTGCCGTTGCGGTGCTTGGTGTCGAGCATGTATTGCAGCGTCGCTTCCATCGTG  
CGTTCCGGGTGTGCCAGGAACATGGCGATGCCGGCGAGCGTCTTATCCGGCTCGGCG  
TAGAGGACATGGAGCACCACCGCCAGCAGCCACGAGTCGGCCTCCTTGCTCCAATG  
GTCGGGTTTGCCCTTGCCGTCCGGGTCAACCAGCATGTCGGTAACGTTCTGGGCGTC  
CTTGACCTCGTTATCACCTGGTCAATCTCGGCCAGCGGATTGAACCGGCAGGTGTC  
GCGCTGTGTCGGGTTGAATTTACGCGCGTAGCCGATCCGGCTCCGATAGCCCCGATGT  
CAGTTCCCAGTTCTCGCCCTTGATGTCGTTGACCACCACGCTCGCCTGCCAGTTCAA  
GAGCGTGGGCACAACGATGCCAACGCCCTTGCCCAGCGGCTCGGCGCCGTGACTT  
CCAGATGCTCCGGGCCGTTGTGGGTGAGGTATTGACCATCCTCGGTCATGCCGAGCA  
CCACGCCAGCTGGCCGAGCAGTCCCGACTTCTCGATTTTCGGGGGCTCGGCCCCAGC  
GCGCCGAGCCGTGCGTCAGCACTTCCTCCTGGGCGCGGGTGCGGTAGATGGCCACC  
GCCACCATGACCACGAAACCCAGCACCGCAGACGCGGCGACGACGTAGATCGCCCT

GGTGAAGATGTCCGGCGCGTAGGGCGTTGTAATCCCAAAGCCACGGGAAGTATGACC  
AGGGCGCATAGATGCCGTGCCCTGCGATCTGGAACCAGGGGCACACCGAGCTGGGGC  
TGATAGGCCAGCGCATAGGCCACGTACTGGCCCGCCGCCACACGCCTAGAAAGAT  
GCAGGTCAAGCAGGCGACGATGGGACCGCCGCGTAGCCCGCCAGCGTGGCGCGTTT  
TCTCGCGTTGTTTGTCTTTGTGGTGCCATCGGTTTAACTCCGTGTGAGTCCTAACGATT  
TGCCCTTGTCCAGCACATCCATTGCCGCGAAGCGGATGCGCACCGACTGGAAGGCTT  
GGTTCATGCTTTGGCCCTTCGCCAGCTGCACCGCGACGGTGTGCAAGCTGGCTTT  
GCAGGCCATCCTTCGCCGGCACCAACCGCAAACGTTCCGTTCTGCACAATCACCGCGT  
GGGGGCCGCTGGGCAGGTTCTCGATGGCTTCCACGGTGCCCTGAAAGCGGCGGGCC  
ACATCGAGATTGACCGGCTGGCCGTACTTGGACGCTAGCCGTTTCTGTGCATCGGCC  
AG

>CONTIG\_181\_length\_2602\_cov\_116.302626

CCATGTATCAGCAAGGCAATGATCATAAGAGCGAACACCACCCCAAACCTCTGGGAT  
TTGTCTGATTATCTTCATCACTACGGGGACACACGCCGCTCCCACTGCTAGCAGAAA  
CATCAAACCCGTCATGGCAGTTGCATTAACGATGCCCCGACGCAGCTGTTTCAATTC  
ACAGGTATTTTTCCCGTTTGCTTGACGCTTTTTCCAACTTTCAGAGCACCTGCAATG  
AGACTCAGCAGCATCGACACTACAGCGAAGTGCAATACAGCACAGATGGTGGCCGC  
ATACTGTGCAAGGTCCAGCAGGACTATGAGCGAAGTTCGATAGGCCAGAACAACCA  
AGCTTGCGGTGAGTAAGGTTGACATCAGCAGGATAGTCCACATGCACTGAACGCCCT  
TGGGTGACCGGTACCAATGTGCATTTGGGGAGGGAAATACGCTATACATTACATCGC  
TCCTACGAGCTCTATTTAACTAACGGCGAACGTGATCAGGGGCACGGGATGAACTTT  
TAGGGATAACAGTTGGAAGTCTTATTGGCCACGCGGCTCTTGCGTATCTAAGCTTCG  
CTTGATGATGAACCTGGCAGTGCATTCAGGCATGTATCAGAACTTTTCAAAGATTGG  
ATCCGAGCAGTTGGAATAAATAAATCTGCACTAAATATTATTTACAGAGGTACAGTC  
TTTTTCTGCCTGGGCTGTAACCTTCTCAAGTGCCGCCCCCGCAGTGTGTTTGCCTTGG  
CTGCACAGGTTTTTACAGACGATTGCAGCATGTGCAATCCGCACTGTCAGCAGCAGG  
ACAACGGCAACGTGCAGCATTGCACCGACAATGGCCACATAGTGCGCAAGCCCGAG  
CAGGACATTAAACGTCTGTGCGATAGGCCAATGCGATCAGGGTGATGGTAAGGGCGA  
GCATCAAGACAACAACGATCATCAGATTTTGAAGGCTCTCGGCAGACCGATACCAA  
CGTGCCTCATGAGGGAAGAGCGCTCTATCCACTGCATCGCTCCTATGACGTGCGAGT  
TACCTACTTCGTAGAACCTGAAGTACCCTGGGGCGTGCCATGCCTGTGCGCGATGGG  
GCAGACCCGCGCAAAGATCTGTGCCGACGCTACATTGAAACAGTATGGGTTGGTGC  
GTCTCAATGATATTTAAATATTGGTTCCGAGCATGCGCTATAAATTACTTTGCACTGA  
TTTTCCGGATTTCTGCGCTCGCAAGCTGTCTGTGCGGATGCAGATGCCTTTTCAATTG  
TTTGATCTGCAAAGAATTGTACATTTCTTACCAAGTTGGGTTTACCATTAATCTGTGG  
TTCCCCAATGGCAATACATTGATTTGATAAGATAAGCCGATTTTACAATCTTTTTTCG  
CCGTGCTTTGCGCAGCGAGCGAGTGCATCACTCTCCGCTTCCGTTTTTGAAGCTTTC  
CGGTAGTCACCCCGAAATTCCGCTCCAAGTCCAGTGATCCCATTTGCAACAGCACCCC  
ATGTTTTAATCCACTTGCCAAGAGGGGCGAGGTTCCGCCGGCTGCTGAGCATTCCTT

GCGGGATGGGCGCGCATGCTGCTACTCCCTGACCTCCGATGGGATACTGGCCAGGT  
GGGCAGCCTTGCTCTGCTCTGGCAGTCACCGAGAAAATAAGATAAAACGCACAC  
ATAGAAAAAAATTCTCATCGCGAGTAAACCTATATTTCTTAACTGAAGCTACTATCT  
TTAGGACCAGCTAAGCCACGTGACCCAGATGGCTGTGAGGTTATGCCTTGATCTGGA  
TTTCGCGTTAGATTGCCGTTGCCAACGTTCCCGCCGCTGAGTTCGCTAGAAGGTCTGT  
TATTGTCTCTTCCAATCTGCTGCGGCATATAGGACCCGGCCGGTTGCCCTGTGGTCC  
AGGACTTGCTGAGCCGCCACGATCAAATGCTGAATATGCCATGAACGTTCCCATATT  
ACCCTGCCAAATTGCAGCCGCCAATGTTGGCACGCTGATGATCAACCCGGTCATGAT  
CAGCCCGATACCGCCCTGCTGCAGGGCTTGGCTAGACAGTCCTTCTGCATTGCCCAA  
CGTGATGAGTCGGGCAGCCCAGTAGGCCGCGGCCACTTTTGCTGTGAATTCAGCAC  
CATTGCTGTGACCACTGACAGCATTGCCATCGAGAACAGCGTGCCGATCACGTAGA  
ACAACCACTTCTTGAACAGGTCTTTGGTCTGGTTCGAAGATCAGCGCCAGGATGAAAA  
TTGGTCCGATCCCGATCAGGAACGCCATGGTGAACCTGAACAACAGCAGCATTGCC  
CCAGCCGCCATCGGCGGACTGGCGGTGCCGAAGCCCGCCATCAAGACAGCGCGGCC  
TTTCTTCTCTATTGCCTCCGGATCGGTGGCGTCGACGCGCACCCGCATCCAGCGCGGT  
CAGCGCCACCTGCGTGTAGGCAAGATTTTCGTCGATCGCATCGGAGGCGGTGCTGTC  
TTTATCACCCGTGAAAAGGCCATGGATCTCTTTGTCCAGGTTTTGGGTCATAGTCTGG  
TGCAGCATTGCGCCGTTGACCCCGACAGCGGAAGCAAGGCTGATGATGATCGCGAC  
CTTGCCGGCCTTGATCATGGTCGCCATTGCACTTTCACGC

>CONTIG\_182\_length\_2587\_cov\_198.976016

GCAATCTCGAAGTACTTGGCGTCGCGCTCGATCCCGATGAATCCGCGCGCCGTGTTC  
ATCGCAGCTACGCCGGTCGTTCCGCTGCCCATGCAATTGTCCATGACGACATCGCCA  
GGATTGGTGTAGGTGCGGATTAGGTATTCCATCAGTGCGACGGGTTTCTGAGTGGGG  
TGACCCCCCGATTTCGGTAGCAAAATCAAGGATGGTAGTCGGGTACCCGGTTACGGTT  
TGACGCGTAGTTTTGCTACATTTTCCATAATTGCCACGATTGGTTCTTGATACCATAA  
CGTCCGTTGGCCTTGTGCCTTGAGGATTGTATGTGGGTTGTGATGCGTAAAATACCG  
CCACGTCTTCAGTAATTCTCAACGGTTGTTTCTTGGCGTTAAGATGCCCGGTAGGCTT  
GGATTTCTTCCACACCCAACAGTATTTAAAGTCAGCAATGTTACTGGTTATTAAGGC  
GGTGGTGAAAGGCTGCGCCGCCGTGAGGACAATCGCGCCGCGACAGATGCGCCGGT  
AGTGCGCCACAGTTCATCGAACGGGATGACCGAATCCCATGCGTTTTGAGTCGTCC  
CGTACGGCAGATCACACAGAATCATGTGCGACCGACTGGTCGGGAATTTGCGGCATT  
ACGTCGAGGCAGTCGCCTTGGTGAAGTTGCAGCATGTGGGTTGCTCCTAGTACTTGG  
GGTCGTAGCGAAAGGTTTCCATTTGGCCATCGCGGATAAAGCGCAGCTCGGTGAGC  
CAGGTCATGCCGTCCTCGGTCTTTGTGACGCTCAGCTCGGACGGGTGCGGGATGATG  
TCACGTTGCAGCAGCACGCGGTGTGCCTCGTTCCGGCAGCTTTCGCCCGGTGCTCACT  
TCGAAGAACTTGCGCGCTTGCGCGAAGAACCGGTTGTCGGCGGTCTTGCGATTGAAG  
TCCAGGCGCAGCTTGTATGGCCATAATCGGTGTGATAGGCGAATTCCAGCACGCTG  
TCACCCTCGGGACGCACGTGCGGTGTGGTGCACCGGTAGCGTGCGCGTCTCCACGCAC  
AGCTCGTCACGCAGGATGATCGAATCCTCGTCGTGCATGTGTCGTATCCGTCGCCGATA

CCCGAGGTCGGGTCTTTTGGGTCTGGCTTACGCGACTGCGTGATAAACCCCTTGCCGC  
GGACGGCCCGCAGTTGCGACAGGTCATGTGCTCCGGATCGTTGAGATAGCCGCAGCC  
AGGCTCGTCTGGCGCGAATCCGGCCAACTCTAGTACCACACGTAGGTTCGCGTTCGGT  
GATCTCCGGGCTAGGCGCCGGGAAGCGAATGCCGCTCTTCTCGCGCTGCGGGCCTGC  
CCCTGGGGCTTCCATCTGCTGCGCGCTGCACTCCCACAGGCCAGCGCGGCTGTCACC  
CTGTTCTAGGTCCGCATTGATCGCGCCCAAGCGCGCGAAGTTGCCACCGGCGTCCAG  
AACCTTGCAATTCTCTTTGCCCTCAGCGGGTCGGCCGCCGCGTCCGACGGTCTGCCG  
AACTTGCGCTGCGAACGCGTGCGGAAGTTAAGCACCAGGCCGTCGACGTGTGGCG  
CATTGAAACCGATGCACAAAGCGCTGACCGAAACGATGTTGCGCGTCTCTTTGGCCA  
TGAACTCGCCGATACCCGTTACGCGCTCATTCTTGTCCAAGTCGCCATAGATCAGCG  
TGGACGTTTCGCCGCGGCGCAGTAGCGACTCATGCATCATTCGCGCATGCGCGACGT  
TGACGCCGAACCACATTATGTGCTTACGGTAATCGTCCGGCTGATCGAATTCCTCTA  
GCGCGACCGTGACGACTTCCTCGGTCACTTTCATCGCTTCTGCAGCTAGCTGTGACT  
CGTCGAAGTCCTCGCCTTTAGTGCGCACATTCGACACGTCAATCTGCGGGAAGCGGA  
TCGTGCGCGAGACGATCGGTGCAATGTACCCTTCGCGCATCAGGCGGTTGTAGTTGC  
GCCCAGCTGTCAGGTCGATCACCTTGGCCGTGAACAGCCCGCACTGCGACAGTGGC  
ACGGTCTTTACGCCTTTCTGGCGGAACGGCGTCGCGGTCATTCCGATGAAACGCACA  
AACGGATTCAGCTCGCGCAGCCCTTCGACCAGCTTTTTGACCGACTTGAGAGACAGG  
TCGAAGCCGTCGGCTTCGTCAACGATGACATAGTCGATCGGCCCAAACCGTCGGATC  
TGCCGCCATACCGATTGGTGCGTGCCGAACGTGATTTTGC GTTGACGGTCTTTGCGA  
TTGAGCGAGGCGCAGTAGACGCCGATTTGCGACGTCAATGCGGCTGGCAAGTAGCC  
CGCCGCCTCTCCGCGGTTTTGACTGACCAGCTCCTGCGACGGCGCTAGAACCATGAC  
GCGTGCAGACGGCTGCAGGCTGATGAGTTCCTCGGCCAGCATCGCCGCGCAGAGGG  
ATTTGCCGCCGCCGGTGACGATGGCGAGAATCGGATGGGTGTTGCGCGCGGACTGG  
ATCGCCGAAATGCCGGCGTCGACCGCTTCGCGCTGGTACCAGCGCGGTGTTTTGCGA  
GCCATGTGTGGGTTCCTGCTCTTGTGGGTTCGTAACGCCTACGTTACAGCAAAAC  
GCCTACGTCGTAAAGCCTAGGCGTTTGTG

>CONTIG\_183\_length\_2587\_cov\_30.643902

CGCCCCCGGATTGTTTCAGGAGAAAAGGCCAGCTCCGGTTCGAGAGCAGGGACAG  
CGGCGGTAGCTGCGAGCGAGAAACATCTACCATCACTGTCTCCGGTCAAAGTATTTG  
TCGTGATGTCCAGGACGACTGAAGCCGGTGAGTGGTGAAATGCGGAAAGCCGCATC  
GACTCCCTCATGAGCTTCGATTCCGAACGCTTGAAAGGTGATGCCCCGTGGAGACGT  
GAGCAAGTTCGCCCACGCGTCGATGATGCTGGCCCAAGCGCTGTTGTATTTGGTGGC  
CCACCGCTCTCTTCTCCAGTCAGCGGTCGGATCTGGCCGGCGCTGCGACGACCAAGC  
CAGTGGGTGCGTCTCGGCTGCGTCTGAAGGAGCAGCCCGCTCATCACGCGGCACTTC  
CACGGCGGTGTAGGGGTCAAATCCGCACCACCAGCGTCCCTCAATCTCTTCCAGCCG  
AACCGAGATGGCTTCGTTGTAGTTGCGCCCAGACTTGGTCCCCGTGAGCTCGCTTCC  
GTAGGCCGCTCTGAGCTTGGATAGTTGGCTTTCGCGGCGATGTCGCTGCTCGTCCGT  
TTCGCCCTCTCTCGCGCTGGCAACCATAAGGGAGTGCCAGAACGCTTGAGTCTGGG

AATCAGCGGTCGCCGCCGAGCCAGAGCCCGCAGAAGGGCATCGTAGATGAGTCCTA  
GCGCCCAGCTGTCTCGCGTGGGGTCCAGCATCCAATGCCCATTGAGTGTGCGGATTCA  
GTGTGTGCAGTGACGCCAGTATTTCTGCGTCCTTACCGAACGCTGCGAGCTCATTTC  
CGACCATTTGCCACCGCCGCCCGGCACTTGCTGGCCTTGAGCATTTCCCGCACCTCAA  
AGATGGAGGATGCATGGCCTAGGGTTATTTTTCTGGCCGTGTTAGGGACACTCTCCA  
CCAACAATGCCGAGAGGGCGCAGCACGGGGAACTTCCGAGCTGCCGCCGTGCGTGCC  
GGGATGGGAACTGCGAGCTGGGCAGGCTGGAACGACAGGACATGGTCCAACAGCG  
GGGCTGGAAGGCTGATTTGATTGAGCAGGTCGCCGGCCAACTCGTCGAATGTCGCG  
GACTCGATGATGAAGACATTGACGCCCGCAAGGGCAGCCTTTTCCAAGAAATCATTC  
ACGGCCGGCAGAAGCTTGGAGCGAGAAGACGCGCACCAAGTAGAGGCCACTGGGGA  
AGGGGTTCATAGGCCAGGACGGACTCAAGCGCCTCCATCACGGAGAAATCGCGG  
CCGCTGTAGCCGACGACGATCAGACCGAATCGCTTGCAAGGCTTCAACCATGGCCCG  
GCGCATGTCTTTGTCTTGAGAGGCCAGTTCAGTGGTAGTGTTCAGGGAAAGTGGA  
CCGATAGTCGCCATGAAGCTTGGCAACGAGAGGCCAGTCAGCTTCATCCAGGCAGC  
GCGTTGCTACATTGGCAGAGTCTAGAGTTGCGACCCTCGGCTTGGCTGCGGTGCCAG  
GAGGCATCAGCGATGCTGCCAACAACCTGGAGTCTTCAATCAGCGGATCGAAGTTC  
GTCGTAAAGACGCATGGGGTCTTTGCCGCCGTTATTAGGCCGGCCAGCATGCGGTGC  
CCAAAGCAGGGCGTCCCTTTGCTGATGGCGTCATCGATGTATTGCCGCCGATGTGTC  
TCTTGCGGATAAATCGCCTCGAACGCGGCCGCATATTCGGTCGGATCGTTGCGTGGC  
GGAAGGAGAGGGGTCCGAGAGAAGAACTCGTCAATGCGCTGAACCCATAGCGGATC  
ACTCGGGTCGACATTGCGGCGAGGGAACCGGGTCTCCTGGCAATAGAGCTTCGCCTT  
GAAGTCCAGGATCATGTCTGATGCCAGTCGGGATGCCGGAAGCTGCGGAAGCGCCGG  
CACCTAGCAGCCAGGCGTGAAGCTCCGGCCGTAGGCTGAAAGTCGTTGCGAACTTG  
GATGCAGAAATAACCTGGATGGATTTTCGTCATCAGGTAGCTGTTGAGTGGCCAAGTG  
AATGGGGTAACCCAATCGTACTACTGCACCTGTCTCATCTCCTTTGACTCGGAGATT  
GGAATCGATTTCAATCACCAAAATGCGGCGCACCGGCCTTGACGGCGCGTTCGCGAC  
GATGTTGCGATTTAGGTCCTGTTGCGACCAGGGCAAGAGAGCGGGCCTTGCTACACA  
AGGGTTTGCTCGCATATGATCCCGCTGCGCCACCGTGCTTTCATCAGGAAGGTTAG  
TTGAGCAAGCCTGCCCGGTCCCTCATGTGATTGAGCAGCAACGCTTCCAGTTCTGCC  
TCGTCTAATGCATGGGCACCCGTCTGGAAGACTAGGTCAGCCACTCGCTGCCGTCGT  
CTCATCTCTTCGCGCCTCGCTGTTTCCTGCGCCTTTGCTTCGCGGCGCTGGTTGGCTA  
AAAGCTCTTTCGCTTGCAAGCTGTGCTAAGCGCTCGGTGGCCCGCTGAATTTGGTCTC  
GGTAGTGATTGCTTGCGGTTCATGCGTTTCTCCTGTCGCTTGGAATGAGTCAAGCAG  
GAAAAGTCTCGCGTCAAGCGTTGAGGCGGTCTCGAATTTTCGTCCACCGCGAGACCC  
GAAAGATCTAAAAACAAGAGCCTTCAAGAACAAGCAA

>CONTIG\_184\_length\_2579\_cov\_247.092170

GGCTGGTTGGCCTGGTTGCGGTGTACGCGTTGAGCAAGCTCGCCGGCGAAATGGTCC  
GCACCTGGTTGGAAGATCGCGGCGAGATTTACCTCGCCGTTGATCGCCTAAAAGCC  
GGGAATCCGTTTTATCTGGCAAGGTCATGTTTTTACAAGAGAAATTGGATTCTGTGA

GTGATTTTTACACGTATGTCGGCTGAACCCCTGAAAAATGTCACGAAATAATCACTT  
GGCCAGTAAGAATAATATTATTCTTATTCTTACTGGTTAATCCGCACGGAGCTGTAC  
ATGGATCTGTCCAAGGACACGCGTGATCGCATCTTTGCCGCCGCCGAGGCGCTGTTT  
GACCAGGCCGGTTTTCCCTACGGTTGACGCCGTGCGCCAGGAGGCGGCAAACGATG  
CAATGCGCGCGGCCCAAGCTGGTTGGGGGGCCGAACGCCTGGTTGCTGAGGCCTTG  
ACCACGCAAATGGTCGATGCGTATGAGGCGCAGGCACTTGAGCTAACCTCTGCCCA  
GGCAGGCATTGCCGAGGGTCGGCCGGGAATCGTTCCGAGAACAGCCATTTTTTCGGG  
CAAGTCATTGAATTTAAATGTAATAGAAAGTCTTGTGGCGCCCTTGCAAGCATGTGC  
GCCGTCCTGCCGACCCTCGTCCTGATCCTGCGCGATGGGGAAGTTCCATACTGCGCC  
CCCCTGGAGAACCGGGCTTTCAACGCTATCAGGCGGGATAAACCCAGAATTATTCCG  
CTTTAGAGCATGGCGGACTTGTGGCCTGACATAACCCAAAACATTACGTAATCACGT  
AGTACGTACCTCGGTACGAAATAGATGGCCCTGTTACGACGATTCCCTGCCGACCG  
TCGAATAGCCGGTTCTCGCGGCCGCAGACGGGAGAGCCCCGCAGTTCGGTCCCTCA  
AATGTCAAAGAGTAGATCTCATCGTCAGAAGCGGCGATGCGAGATCCAGCGGCGGC  
TGCCGTCATCGGCGGAATTGGCGATGGGGCTCTCAGTGCATCGTCAAAGGTAGCGAT  
GGTCGAGCGTGGCTGAGGGTCGGCAGGGGTTCTGTGTAAAAAACCTTTGCTGACAGC  
TAGTTAGATCACTTTTGCTGTTTTTTACACGAATTCCTGCCGACCTCTGATAGAGTCT  
TTTTTTGACCTTTGATTGAATGAAATGCTAACTTACGCAATTTGGAACAATAAAGGT  
GGGACAGGCAAGACAAGCCTTGCCCTCCAGACTATCTGCAAATATGCAAAAAGTAA  
TCCAACGAAACGCATCTTGGCCATAGACATATGTCCTCAGGCAAATATGTCGGAGTT  
GTTTCTTGGTGGTCTTCAGAAATGGCGGTAGCGGTAACTTCTTGAACGGCAGGGCAT  
GACCCCTCGGTGCAGTATCGGTGGCTACTTCGATTTGCGCATGCCCTCCGCTCACCA  
GATCCCAGATTTCAATGCGAAGGAATACATCACCAGTCCGTGGAAGTACAACCTCGTC  
AATTCCGAAGTCTATCGACCTTGTTTGCGGCGACCCGTTACTTGAACTGCAAGCTAT  
AGCAATGAATTCCTGGCAAACCTTACAATTGCCAGGGGTAAACACATGGCTCGGGG  
TAATCGACTGGCTGCGTGACTTTTTTGCTCGTATCGATAGTGAAGTACGACATTGTCTT  
TATTGACACAAATCCGAGTTTTTCTATGTATACGCAGATTGCGCTCGCTGCGGCTGA  
TCGCGTTGTGCTTCCGGTGATGGCTGATGACTCATCGCGCCGCGCAATCCAGAAATGC  
GTTTTCGCTCATCTACGGCCTCAAGCTTCCTTCAAAGGTATATGAGCAGTACACGTTT  
GCCAGCAAAATGAAGGTGGCTGGCCGATCGCTCCCGAAAGTGCACTTAATCTTGAA  
AAATCGCCTAACTCAGTACATGGGTTCTGCATCGGCCTACGCCGCAGTCTTGTCTGG  
GATCGACACTGATTTGATTGACTTGGTTAATTCATATGGTGAGCATTTACCTTCAAC  
AAAGTCACCGACGGTATAGTTGAAATACGCGATTTTGGTACAACAGGTGTAGTAGC  
CTTTGCTCGTGGTACACCGTTTCGATATATTGAAGACGGGCAAGCTTAATATCAGCGG  
ACACCGTGTAGAAGTGAATAAAGATTATCGTGATTTAGCCATCAAAGCTATTAATTC  
TATAGCGACTAAATTGTAGAAAGCTCTTAGCATTAGGGCGGCCTGGGTGGCCTGGCT  
TCTTGGTCAGCACTACCAATCAAACCTGAGCCCTTCGCTGTGCATGTAATCCACCGC  
CAACCCAAGCCGCGCAAGCCGTCGTGCTCCAAGTGGGAGCACAACCGCTTTTCGGTA  
TCTATCGGAATTGATGAGCCTGGAACCGGCCGCGCTGCTGGTGGTTCAGGTTGAACC  
CTTTGAACCCCGGGGCAAGGTGGATGGTGGCGGCTGGACTACTCGCTTATCGGGCCT

GCTTTACCGTCGACGTCCCCCACCCTGAGTAGTGGCTTGGTTTAGAGTCCGGGGGT  
AATGATATCGGTGTTTGCCAGATGTTGGGCATAAGCAGCCGGGGTCATGCCGCCGAT  
CGCCTTCTTGGGTCGGTCCTCGT

>CONTIG\_185\_length\_2565\_cov\_28.504512

TGCGGCGCTCTTCATCGATCAGATAGGACATCGGATCGGGGAAGTGTTGCGCGCTGG  
GGTAGCTGGTGCTGGGGGCGCGTTGTGCGTCGATCTGGAAATACCAGCCGTGCGCA  
AGGCGGCGGAACAGATTGTTTCATCTGGGCCGACACGGCGATCAGTTCGTGCTTGGTC  
GCGGAGTCCAGGTCTGGCCCGCGATAGCGCAGCGTCGTGATCAACGACGCGTTGCG  
GTTACAGCACACGCCGGGGGCGACCAGGTATGCCACGGCAGCACATCGCCAATAT  
CGGTGGGTTCGTTGCTGTACTTCGGAAGTCGCTGCATGGGTTGGCCTTCACTGAGCG  
CCACCGGCAGCGGTCCGCATTGACGGACCGCTGCCGGTAGCCCGCTATGCGCGGTA  
GTGGGTTTTCAAACGGAGCGCGCGTTTCAGCGCTTCCGGCCATTGCGTGTCGTACTT  
GGTCAGCAGGACCAAGCCGATATGGATCACAAGGTAGAGCGGGACGCTCCACCACG  
ATTGCAAGCCAAACACCAACGCCGCTGCCATCGTGAACGACACGATTGCCATGTGCG  
CGAGGGATTCCAGCGATGAGACGCGGCGTGGATAGTGCGCGATGCACGGGCACTTC  
GTAGCCATCGGGATTGGCGTTCTCGTCCATGTCAGAACACCGCGCCCGCCGCGTAGC  
CCAAGAAATTCAGGAAGAACGAGGAGGCTGTGAAGGCGATGGACAGGCCGACACA  
GACCATCATCAGTTTGCGCATGCCTGAGCCACCTTCGGAAAAGGCGATGCCCAAGC  
CACAGCTGATAATGGCGATGACGCCGATGGCCTTTGCGACAGGGCCGCTAATACTAT  
TCAGGATCTGGCCTAGCCAGCCTTCCCACGGCATGCCGGTACCGCCTGCATAGGCGG  
CTGCCGGCACTAGGAGGACCGCCAGCGTCAGCAGCTGGAGGGTGCGAGTGTTACGG  
AGCTTCATCGTCATATCCCTGGAATGGGTTGGGGGAATTGATATCGTTCCTTCACAT  
GGTTTGCAAAACCATTGCACACCATGCCACGAAATGTAGCTGACAACGCATACACC  
TGCAATGTCAGCTACCCAATTCCATCGTCCATTCTTTGACGGGCATCGCAGTCAGTG  
ATTTCTACACAACGCGTAGGAAAACAACACCACCGCCCCACCGTTCAGCTCACTCG  
GCCGCCACCAGCGTGTAGACGTTGCCTTCGGGCGTCTGCTGGACGCCCTTCACGCGC  
AGCACTTCACGCACGCGCCGGACGGCCTTTTGGCCGCCGTCCGCCTCGATTGTCTCG  
AACCCGATGCTAACGATGATCTGCACCGTGCGGGCGATCTTGCGCGGAACCGGCAG  
GAATCCGCCTTGCACTAGCAAGTCCTCGATGCGCTCCAACGCTTCGTTGGCGCTGTT  
GGCGTGGATGGTGCATAGCCCGCCTGGATGGCCGGTGTTCCAGGCATCGAGCATGTC  
CATGACCTCCGGGCCACGCACCTCGCCGACGATGAGGCGGTCTGGTGTCATACGCA  
GCGTATCGCGCAACAGGTGCGTCATGCTGCGGGTGATCTGGTCGCGATTCCGCACGG  
TGCGCAGGCGCACGACTTCATCAGCTTCCACGCGCAGTTCTAGCGTGTCTTCCAGTG  
TGATCACCCGCCCGGTGATGCGGCCCATTTTCGTACAGAACAGCATTGGCAAAGGTG  
GTTTTTCCCGTGTTGCTGCCTCCGACGATCACGATGTTGTGCGGTGCATGCACCGCCT  
TGACGATGATGTCGCGCTGGTGCTGTGTCAGCTGCCCCGTTGGTCACGTAATCGTCGA  
GCGTCAGCCGCAGATTGGACTTCTTGCGAATGACGAACGTCGGGCCATCCGGCGATT  
CCGGCGGCAGGATTGCATGGAACCGATAGCCCGTCTCGGGCAGCTCGGCCGGGAAG  
CTGGGATTGTCCTTGTCGGCAATCTCGCCGACGTGATCGGCCACGATCTTGATGACG

CGGGCGCGTGTATTCACGTCAAGCGTATGGTCATGGCAGATCCTGCGGGCCGTCCTTG  
GCATACCACAGGCGGCCATCGGGGTTAACGCGCACTTCCTCCACGGCTGGATCATCC  
AGCAGCTCCCCGATGGCACCACCGAGCGCGGATTTTCATCATGTCCAGCAGGCGGCT  
ATGCCGGGTGATGGTGGTGGACACGGTGGGATTGGCGTTCATGGGGTGGCCTCAGG  
ATCGTGGTCGGCGTCGTCGGGCTGCCCCGGCCGCTGCTTGCAGAGCATCGAACTCGCT  
ATCGGTTTGGGCACGTAGCAGCGAAGCGGTCAACTTATCCAGCAGCGGGCGTGCGCC  
CGCTAAAGACCCGCTCTACCGATGCGATCAGTGCGTTGTAGAAGCCCTCCCCTGCCG  
CGTTGCTGGCTGGCGTAGCGGCCGGCAGGCGTGCAAACAGGTTCTTGGTCGTGAGC  
GTGGTCAGCTCCACCAGCATCTGATTGCCGAAGTGCACGTTGCGCACCTCGTTGCGC  
AGCGATCGCAGCTCCTTCAAGACCAGCATTTCTTCGGCTTTGGCGTGTTTCGGGGTCG  
TAACGCTCGGCCAGCGCGG

>CONTIG\_186\_length\_2544\_cov\_14.017791

GCGAGCCACGCGTGTTCGCTCGACACCGCCGCCACCCAGCTGCTGGCGCTCG  
GGGTGACGGTGTTTCGAGGTGTTGCCGGCCAACTACGTGCGCGCGCCCAAGGTCTAC  
CGACGCGGCCGCCCCGGCCGCGTTGAAGGCGTTGGCCAAGCTCCAGCGCGAGGCCAA  
ACCCGCCAAGCCCAAGCCGGCCAAGAAGCCGGCCGGCGTGCGGACGGTGGCCACCG  
CCGCCAAGATCCTGCCAGCGATCGGGCGCAGCTGAAATTGCCCGGCCTGCCGCGC  
ACCCGGAAAGCTGCCCCGTGCCACCAGAGCAATCCCATGACCACTGCAACGCGCCTG  
GAGCTGCAGGCCACGGTCGATGCGATCGCTGCCCCGCGCCTACATCGCGCCACCGCG  
CGTGAGGCTCTGGCGGCATCGCAATGCACGCTATAACGCGCTCACGCACACCATCG  
CGGTGTCCCAAACACTCGCGCTCACACTCGATGCCAACCAGCGTTACACCTTGCTCG  
CCCACGAAGTGGGCCATGCCAGCGGCGCGCGACGATGCTCAAGCGGGTTGGCAGC  
TACTTCTGGCCGCCAGCGCTCGCGCTTGTGGTTGGCGTGATGACTGATCGGCTCGGG  
CGCTCGATGCAACACCTCATCGAGACAATCGCCGCGCTGGAAGCGCGTGCGCTCGG  
CTTCCGGTCGCTGACCGAAAGCATCGACACCACCACGCCGGGCGGACGGCTCATCTT  
GAGGGTCGGCAGGGATTTCGTGTAAAAAACAGCTAAAAGTGAGCTAACTCACTGTCA  
GAAAAGAAGCTTTTACAGATTCTCTGCAGGCGCCCCCAAGCCACGTTTTCCCTCCCC  
TGGTATGGTCTTTGCATGTCTTGTTCGACGCTACGTGCTCAACAGGATGACTCTATG  
AAGCTGCGTATCTTCACGCTTGCAGTGGCTATTGCTTGTGCCCTCCAGTGCTTGCCA  
AAGGCCCAACCCAGCCTTGTCCAACGCTCAAATCAAGACGGCGCTGATTTCGCGAA  
TCCATCAACTCGTATCCAGGCAACTGTCCTTGCCCCTACAACACAGCGCGTAATGGC  
AGCAGCTGTGGCGGTAGGAGCGCATATAGCCGTGGCGGCGGTTACGCGCCCCCTTG  
CTATCCGAAAGACGTAACGGCCGGCATGGTTGCTGAATACCGTCAGGGTGTCCACTG  
AGGGATTTTCAGATTGCTCGTCTTACGCCGTTAAGACGGTGCCACAAGGCAAAAAAT  
GGAGATACACATGAAGAAGACAAAGGCGGCTATTGCAATATTCGCACTGCTCGCAT  
CGGCGGTTGTATCTGCGCAGACACATGTCAATGGCTACCATCGTGCCAATGGCACTT  
ATGTGCAGCCCCACTACCGCAGCGCTGCGAACAGCACGACGCTCGATAATTATTCG  
ACCCGCGGAAACGTCAACCCATACACCGGCAAAGCTGGCACTGTGGATGGGTATAA  
GGAGCAAAGCACTTATCGCCAGACCACCCCGCCGCTACCTATAACCCCTATCAATC

CCAATCAGGCAACCCGTACAACCTCGGGATACTGATACATCGCCAAACCGCCCAAGC  
AACAGACCCCCCAGCTACGAGGGGTCTATTAGCAAACCACATCGCCGTTTGCTTTG  
TCAGAGGGGGCCAAATTCATCCACGTGGGCGCGGAGCGGTGTATCACGCTCGCGCC  
TTCTCATTCCTACGAATGTCGCCTGATCGGCGAAATCCAGGGGGCCGGGCCGGCCCCCT  
TCCCGGCTCGCTCACCTGGACCGTTGGCGGCGAGCTGGTGTTGGCTTGGGGTGAATT  
TTTCGCGACGTTTCGACGGCTTTGAGTCCAAGGACGTCAACAAGCGAGAGGCTTTCTA  
TGTCACGCATTGGGGCGTGTGGGTGATCGATGGGAATGGCAAGCCGGCCAGTCACG  
ACCCGCTGTTTGTTCATCGGCGCCGACCAATAACAAACACCGTGCCGGTTGCAGAGCT  
ACGTTTTCCACACTGCAATCGGCGCGGGCAAGTCCTCGCCGAATTCGCTGTGGCGTG  
CAACAACCGACGCCCAGACTTGCCGTAACCTCCGCAACATCGATGTCTCGCGTGGTG  
TCGAGACGTAGGCGCGACCGCCGCAGTCGGTGCAAAACACGTCCCCGCCTTTGCAG  
CTGGGGCAGCGTGCGAATTGCCAGAACGAGCGGTGCATGAACACGCCAGCGAAACA  
GAAGTAGCAGACGATCCCCGCTTGATCCATCGTTCCGCACGGGCCCGCCGACGCGTC  
ACACACGCCAGGTGGGCCGAATAGCCACGGATCGAGTCGAGGTCGTTTGCGATTGC  
CCATGCACCACATTACCCATGCCGATGTTCGAGAACATGCGAAAACAGGCAGTGC  
CGTGAATCTGATCCAATCCAGGCGGGGGCGTGACCGCAAGCGGTCACCGGCTTGGG  
GTGCTACGCACCGATGCCGCGTGCCGCGTCATCGCCAGTCGGCCCTAATCCTCGCCC  
CGGCGCGCTCCGCTTGCAAGCAAAACCGCGCCCCGTCCAGCACGCCGTTTCCGA  
C

>CONTIG\_187\_length\_2539\_cov\_10.592869

TCCCAACTCTTGGGCTGCTCTATCGCGTGTCTGCTTGGGGATGGGAGCGACTTGAAGG  
GCTACCTCAAAAAGCTCTCGCAGCGCGAGTTCCTGGGCCGCGACGCCAAGACAGCG  
TTCGACAATTTGCTCTCGCAAGCCGAAGAGACCTTTGGCTCGATCATGGGCACGTTC  
AAGGAACCGCTCAACCAGTTCATCAACCCGATCCTGGATGCATCAACCAGCGACAA  
CGACTTCCTGCTGACTGATGTGCGCAAGAAGAAGATGAGCATCTACATCGGCATCCA  
GCCGAACAAGCTGGCCGAAAGCCGCCTGTTGATCAACTTGCTGTTTAGTCAGCTCAT  
CAACCTCAACACCAAAGAGCTGCCGCGAGAACAACCCGGCGCTCAAGCACCAAGTGCT  
TGCTGCTGATGGATGAGTTCACGGCAATTGGCCGGGTGACATCATTGCAAGCGCGG  
TGAGCTACATGGCTGGCTACAACATTCGCTTGCTGCCGATCATCCAGAGCATGGCGC  
AGTTAGACGCGACCTATGGCAAGGATGTCTCGCGAACCATCATCACCAACCATGCG  
TTGCAAATCGTCTATGCCCCGCGCGAGCAGCAAGACGCCAACGACTACTCGGACAT  
GCTCGGCTACACCACAGTGCGCAAGAAGAACAAGTCGCACACCAGTGGAAGCAAA  
GCAGTGTGTCCTATTCCGAAACCGAGCAACGCCGCGCATTGATGCTGCCGCAAGAG  
TTGAAGGCGATGGGCTTTGACAAGGAAGTCTTCCTCTATGAAGGCATCCCAAGTCCG  
GTGCTCTGCGAGAAGATCAAGTATTACGAGGACGCGTATTTACCAAGCGCTTGTTG  
CCGAAGGTGAAGATCGAAGCCTTACAGATGGCGCTTGTCATGAGTGATAGCACACCT  
TCCAATAAGCCTCAAAGTCGATTGAAGGCTGATGGCAGCCACAGTCAACAGCTGCT  
GCGTGATCTGGGAATAATCAATGCACGCACTGTGCAGCAGTTGGGGCAATTGCAAC  
CAAGTGTCATCCGTAGAAAAACCTAAGCGTAAGCCCAATTTTCCACGTCCAATGCAA

GGCCTCAATCAGGATGCTCTTATGACTCAGACCAACGATTCTTCCCCTGATTTCGGTC  
GGCAAACGACCGCCAGTGCCACAAGGCTTGCGCGAAAGCTTCAAGGATTACCCCGA  
TCACATCGCGCGGTTGGAAAGCGCCCTCCAAGAGTCGGTCGATAAGCCATCGCCGA  
TCACCCCTCCGTTGGAGTTTGCATCTGGGCGATCGAGGGCTGTATCGATACTTTCA  
TTGACGAGTCACGCGAAAAGCTACGCATTGCGGAGCAAACAGTTGACCAAGAGGCA  
ATCGCATTAGCGAGGTCAACGCATCTGCTTATGCTTCACAGCGCCGCTAAGGGCGCA  
TGGAAGGGGCAGAACTTGATGGATTATTTTGGCTTCCCAAGTTCGAAGTATCCCAAT  
GGTCAAAGCCAGCGCACCGATCAGGATGTTCAAATGACACAGGAAAATTCTCCTTC  
ATCTGGCTCGATTGACGAATATCCTCCCGTTCCCGAAGGGTTGCAGAAAATTTTCA  
GGAATACCCTGAATATATGGATAGATTGAAATCGGCCCTCAAAGAGTCGGTGGATA  
GTCCGTCATTGGTCACTCCTCCTCTTGAAATTGCAATATGGAACCTAGAAGATTGCTT  
GGATTCCATCTTGGGTGAGGTCAACAGGGAGCTTAGGGAAGCTGAGGAGGACGGTG  
ATCCGGTAAAATTGGAGGCGGCCGAGAAAAAGCGTAGGCAGCTTGGGCCTGCGGGG  
TTCAGTCACAACCTGGAAAGGCAGCAACATGTTTGCCTACTTTGAAGCACGCGGAAAT  
CGGCAGTCATGACCGGAATTCAAGACCCGCTTGATCTGGGACAGCACGAAGATATT  
TTCAGGAAGCAAATTCTAGCTGACCTGAATTTTGAGGGACTATCAAGTTATGAAAGT  
CCTAGGGCAATCATTCTGGCGGGCCAGCCTGGAGCTGGTAAAGGCAGTTTAGCGCG  
AGCGGCAAGCAGCGATTTGCATGGTGATTCCATAAAGATCGATCCTGACGAGCTTCG  
CAGATATCATCCAAGGATAGATGAGTTTCGGCATGAAAATCCGTTCTCTTGGTCAAG  
TCGGACTCATTCCGACGCAAGTCAATGGGCCGATGAACTTTTAGCGGAAGCTACCTC  
TTCAAAGAAAAATATAGTCTTCGATACAACCTTGGCAAATGGGGAGTGGGCATCGA  
AGACGCTCATTAAGGTCTTCAAGACAATGGTTATGAGGTTGAGGTCCGCGCCGTTG  
CGTCACCTAAGCTAGAAAGCGAGCATGGTGTGCGACAGCCGATTTACGGCGAATATC  
GACAGGGAGGGCTATGGTCGTTATGTGCCTGAGGGCGCGCGTGATGCGATTTACGG  
AAAGCTCCCTGTCAGTTTGGATACCATCCATGCGAACAGCAACGTGCCGATCCGCAT  
CTTCAATCGTGAGGGCGTCGAGCTTTACGACAGTCGCACCGATGCACGCATGC

>CONTIG\_188\_length\_2533\_cov\_179.510391

GCATTGCTTGGGTGTCCGGGTTTATCCAGACCGCAGATCTGCACCCCGGCCCTCGG  
GAATGCTGACGCCCTTCAAAGACACCAGGCTCTGGATTGCTGCCTTCAAGCCGGACG  
GGAACCTGCGACAAGTAAGGCCCCAGCTTCGCCAACTCTACCCAACCCTCAGCAAAG  
GAACGACATGAAAAAATCATGGATCGGCCTGGTCGCGTTGACCATGGCCCTGGGCC  
TGACCGCCTGCGGCGGCAAGCCTTCGTCTGACAATGCCAAGGAAGCCTTTGTCCAAC  
TGCTGAAGGACAGCGGTGCCGGCCAAGTCACCGACGTCCAAAACCTTCGAACTGACT  
GGATGCGTGGAAGCAGAAGGCGCCGACGGCTACCGCTGCGACACGCGCGGCCAGG  
CCGTGCTTAACATCGAGGGTCGGCAGGTGCCCATCCCGCTGAGCAAGAACTTGCGCT  
ACGCCAAGAGCGACGGCTCCTGGAGGGCCTACGCCAAATGAAGAACGAATCGAATT  
CGATGGGCGGCACGCCGGTCAGCGCTATGGGTGGCTTTTCGTGGGGACGGCGCGCTG  
CGCGCCGCTCCCAAGATGGTCCTGACGCCTCACGCGCGGTTCTTCTGGTGGTTCTCG  
CTCAGCCTGCTCTTCTGGGCCCCACTCGGCTTCATCGTCGGGCCGTTGATGGCTCGG

CGGGGGCTGCGAAAAGCGGAACGGCTCCACCCGCAGGAGGCTTACGCGGCTCGACG  
GCGCGATCAGGGGCTTCAGCTGGGTCCAGTGGTGGGTCATGACTCCGTTGACGCTGAT  
GATGGGCATGGGAGCCGTGGCGATCATGAAGTCACTACCCATGCTCCTGCTTGTGGC  
TTGGGGCGCAGTTTATGGGATAAGCATTTAACCAGTCATCAATCCGGAGGGCCGCTAA  
CTATTCGCTTTAATTAGAAGCCATGACGCCTTCTGTATTTACTTGCCAGCTGAATCAC  
TCGTGGAGTATCGCTTGTTGAAATCATAACTCCAGCTGTTGCTGGACATAAAACAGC  
ACAAACCTCCGCCATGGCTTTATGAGCACCTAACAGGTCCAGATGAAATATAGGCTC  
ATGATGTGCTGTTCTGTTTCTCAGCTGACGAATCTTTTCAAGTTGCTGATTGAATACG  
GACCTTCTGGGAGGCTGGCTATAGAAGCTTTTATGCAAGCACGGAACCCAGAGTGT  
ATGCTCGTATCGTCTATCAGTAAGCGTGCTCCAAAATCCTAAGGTCAACTCAGCGAT  
AACCTTCCCTGGTGGAGGCTGACCATTAACAATCGTCCAGCATCTCTCTGTGCCTT  
CTGGAGAATTGACTGGGCTCTTCCATCCACCACGCTAAGCAATGCGTTTTCTGAAAA  
CCATCGCACTCCGAAAAAACGCGTCAACTCTCTGTCAAACCTATTTCTAAGAGCAAC  
TTCCACAAAATGAATGTCGGCCATTATAGCCGAACCTAATCTTCGTATTAAAAATATA  
CAGCCTCAGTGCTTCTTGACGGTTGCCCTGAGCGGTACTGAGATACCGACCCATTCT  
TGCAGGGGTCAACGTTTTCTCCAATCGCGTCAAGCTGGGTTTTAGCTAATCGAGGTAA  
CCTTGTGCGTTTTTTTGTTCATATGTATTCTTTGAACATCCAACCTCCCAAGCTGAACG  
ATAACCTAACTTGGAAGCGCCGCCTAGGCATGTGTGGGAACGTTATTTGACATGGAG  
CGCAACGCTATGTAAGCTCTTCCAAAGCTAGCCCCCGGTGCGACCTCTGCGAATGCA  
CGCCCCCGAGGGCATTGTGTTTTTTGTGAATCTCGGCTTTGACTTTATTGGCTAAGACT  
GATAGAGTCATTGTCAAAGCGAGCCCCCGGTGCGACCTCTGCTATGCATGCCCCCGG  
GGGCATTTTTTTTGCCTGTAGCTTTTAAAAAAGCTTTGAAGACATGCAATTTGCCTAGT  
TCTTAGCCACCTTCACAGGTGAGCGCCCGGATGGCGAACGCCGACACCCTGGCCTCT  
TCAATCTTTGAAGCGATGGTGTGGCGGAACCCCCTGCCCCTTCTCCGACATCCCTTG  
CCGCTTGATGTAGACGGAGAACTGGCGGCTCAGCTGCGGCCCGAAACCCCGCACGG  
TCGAGTTGGGTAAGTCTGGGAACAGCCGCTTTGCCGGAGCCCCCACGCAGAGAGGG  
AACCCAACCTTCGATGACCACCTAGACGCTACTTCCGATTGGTGCGGTAAGGCAACTG  
ATTGGGAGTCTCAGGGACCTGTTGCTTACTGGCATGAATGGTGATTTGTCTTGAGT  
CCGTCCCATCTTCAAACCAGTTATGCGGGGTTGTGGCCGCGCCTCTCCAGTAGCCAA  
CGAAGAACCGGCCACTAAGGCTAGCAACGGGCATGAACAACCCGCTACAATGGCAG  
ACCACAAAGCAGGACACCCTCCTGGTTTTGCGTGGCTGTAGGAGAGTCAGGAAGTTG  
GATCGGGATCAGTACCTCCCCCTCTCTCCGCCAGTTTTATGATCCTGCAACGCGATT  
GCCTGGATCCAGGGCCACGCCAGTGGCCACGT

>CONTIG\_189\_length\_2532\_cov\_3.755509

TTCTGACGCGCCGCGTGCGTGATCGTGGCGCGGGCGCACAGGTCGCCGGCCGTCG  
GGAGGGAGGCGATGTCGAGTGCATCAGGACGTGCATCGGAGCCAGTCTGATACCTC  
TGCAGCCCGGCTCGCATGCACACGATCTCTGCGACGCTGAGCAGTGCGCGCACGCT  
GTCGCGCACGCTTCGATAGATCCCCATGTCCGGCATGCCGGACAGGACGTGAGTA  
CGCGCTGCGTATAGAAACCGGCAGACTCCCACAAGCCCTCCAAAATTCTGAATTGCT

CGCTCGAGGTGGCGACCAAGGTCACCATGACGTCTTCGGCCGCGTCCTCGCCGGCG  
GCGGCGCCCGATGCGCCGAGCATCGCGAACCATCGTGCAAGGTCTCGAGCGTCGC  
CCGGCGCTTGCCGCGTGATGCAGCACCACGAGGCCGGCGAGCAACTCAATCCTCA  
AGCCGGAAGACTGGTACGCAGGTACTGTGAGAAGACCTGCCACGAGGGCAGCGCTG  
GTGTCCCGGTTCGAAGGCGGCGATATCGGCCGCCAGCTGCGGGACATCGTCGCTCAG  
GGCGCGAAACGGCACCTGCATACTGGCCCAGCGCATTTGCTCCTGCATGAACGCCTC  
CAAGGCGTCGATATCAAAGGGTGCGTCTTCGGGTTCGGTCACGGGGTAGGGCTCGCT  
TTGCGCGGTGCATTATGCCGAAGGGGACTGCGATCGGATCGGAGTCTGAGGTTTCCC  
CACTTTTTCAAGTTACGAACCGCATGTTCTGGCTGGCCTTCGGTGAAAGCTGACGTA  
GCGCGTGAAGCATGGCGTGGAGCGGTTCGTTCCAACCATCTGGCACCGCGGAGCGCA  
ACAGATGCTAGCGGCCATCGTCTTAAAGCGACACCAATCGCCCCGCGATCACCGGC  
GTGGATGAGCGCACCAGCCAGCGCACCATGCCGCCATACAGGCGCTCACGTTCCGGC  
GTGCAAGCGTGGGTGCTCAGCAACCGATCCAGTCGCTTCAGCGGCGCACGGATAC  
GTTCGACTCCCAACCAGCTTCGGGCCAGATCGATCAGCACCAGGCGACGACCCGCC  
AGCAGCGACTCGACCGCCTGCAGCAACGTTTGTGCGCGTAGTGCAAGCATCGGCGA  
CAGTGCCGACTTCAGGCATCTTTGCAATACTTGGCTCGCACGCATGTCTCCGATCCT  
CATTGGTATGGTAAACGCGAAGATCGCGCCATGCGCGCGCTTTTGCAAACCAAAGC  
CGCTGCAAACCTTTGACTGCTAAGAACTAAAGCTGGGGAAACCTCAGGGTTCGGAGT  
GATTTCCGATGGTCGAGAGCGGGCATCGGGAGGGGAGGGGTTTAGATGGGTTTATC  
CGGAGTAGGAGGGAGCAGCTTCAACCCAGAACGAACCCGCATGAATTTTCGGCTGC  
CTGCGGAAGGTGCTTGATATTCTGAAGCTCTCGTCTAGCCTCTAAACATCATTGGCT  
ATTTGCTCGGCGCTCAAAATGCGACTGGTTAGGCGCCGGACATCCTCAGGATCATAT  
TTTGATCTTTTGATTCTTCAATGTGCCGACTGATTTTCGTCACGTTTCGCTCTCGAATT  
CTACGATGATGTAGTTGATGTCGTTAGGCCCAAAGTACAATGGAATCTTTCCGCATT  
CTCCGTTTAGATAAGCCTTCTTATCAGAGTCATCCATTGCCCCGCGCCGCCGCAAGCG  
GCCAGACAGTGTTCCACGGCGGAACGAAACGCCATTTCGCGCTCACCCGCGAAGCGG  
TAATTCTCGTTCTTGAGCTCTCCTTGCCATACAGTGGAGCTTCGTAATTCTTCATGT  
AACGATGCAGCTCCATTAGCTTGGAGTGCGTGCCGTCCATGTCAAAATTGATTAGGC  
AGAGCAGGTGCTGCTACCTCTTGGTTCTCTTGTATGAAAGGGGAATCCGAAGCCCTG  
GGATGCAAGTGCTAAATCTCCCGCACAGCTGCAATGTAGTCACCAGGAAGACTAGC  
TTGTGAGCTAATGTAATACACAGGATTAACGCCATTACGCGCGGCCCACTCCTTCTT  
CATGCCAAGGCCGTAGCATCCGTAATTCGTCATGTGACTTCGCAATTCCGACAGGCG  
AAGGTCACAGAAGGACACCATGGGGGCTGCAAATTCGATCTGCCCCCCCCCTATGT  
ATGACTCGCTCGCGCGAGTATGCGATGCGGAAATTCGATTGGAGGATTCCGCGCAGT  
GCTTGCTTGTTGGTAAAATGAAAAAGCGTCTGCGGTGCAAGACCTGGAGCCTGACA  
GTTCTGGCAGATGGCGGGTGCTGCTCCCGTCTGTTGGATGTCTTTAGTCATCGAGTTC  
CCCCTGATTGTTTATTCGGCAACCGAATTCCATCTGGATGTTTGCTTTCCGGAAGAGC  
TTGTTTAGCGAATTCCATTAAGTATGCGGTACCCGCGGCCGGGTGAACCGATACCGT  
AGCAGGTATTCAAATTTACAAGTTTGATGCAACAATTACATGATCCCGACGATCTCC  
GACTTGATTCACATGCGATTTCGGAAGATTTATCGGGGTAGGGC

>CONTIG\_190\_length\_2509\_cov\_34.573887

CCCAGATCGGCCAAGCTTTCAAGCCTGCAGCAGAAGCGTGGAGCTTCTTGCCATTCT  
TCAAAGTAATGACTGCTCTGAAGATGAGCTTGTAGCCAGGACGAGGGGTAGCGGTC  
GTTGTTGACACGGCAGTAAATCCTCTTGTTGAGGGCGCTCATCCGACAACTTCGAG  
ACTGGTGTATTGACACCCCTTTGCGAGGGGCGCTATACTTCTTCGGCTGTTTTCGAGG  
CAGCCAATCTCAAAGACCCCAACGACTGACGCCATGCGTGTGAGGTTTGTTCGAGG  
CAGTGGTCCCTACGACCACTGCGTGTGTGTTGCAATTTTCAGTGACTCCAGATATCT  
AGGGGCTCGACCAATGGTCGGGCCCTTTTTCGTTGGACTCTAGAGCCCCAGGGCAC  
ATGTGCTATGCGCCACCTCTTTTTCAGCATTACTTTTTGTTTCGGTGCAGCGGATTTTGG  
TCATCCTGCCTGTAAATTTTCGCTGTCGTCAAACCTTTTGTTCGGTATAGTGGCACCTG  
GCGCTGTGCCGGCCGATGAGGAATAGTCGATGACAACGAATTTTGGCAATAAAATC  
AAGAAGTTAAGAAAAGACAGGGGAATGACGCTTGACGCACTCGCGGCAGCGGCTGA  
CATGAGCAAGAGCTACTTGTGGGAGCTGGAGAACCGAGACTCCCTCGCCCATCGG  
TTGAGAAGCTCGCGTCACTCGCCAAGGCGCTTTCGATGGATGTGTCCTACTTCCTGG  
ACCAAGAGGCGACTAGCCCCGAAGAGCGGCACCTGGACCAGGCCTTCTTTAGGAAC  
TACGGAGAGCTTGACGCGACAGCCAAAGAGCAGATGCGCAAGATCATGGAAACCTT  
CAAGAAGTCTTAGCCTGCTAAGGATCGGCGGATGACAAAGGATTTGCTTACACCCTC  
CAAGGCAGCCTTCCGGCTAACGCATTTGCTCAATGCAGTGTACGCGGCGCATGGGG  
ACCCCCGCTTTCCAGTTGACGTCGTTGCTCTGGCCAAAGGGGGCAGCAGAGATCTTCC  
GCTGGGATGACCCCATCACCAATATCGAATCGGCAGACATCAAATCGTTTGAAGGC  
GCACTTTTCCCGAATGACACGCGCAGCAAGTGGATGCTGCTTTACAACCAGACACTG  
AAATCTGCTGGTCGCATCCGCTTCACGCAAGCGCACGAGCTTGGCCACTACCTACTG  
CATCGACAAGACCGCATCGACGGCTTTCATGCTCCGCACAAGACATGGTGAGCCT  
GACGGAGCAAGAGGCGTCGATGGAAGCCAGGCCAACGCCTTTGCTGCGACCTTGC  
TCATGCCGCTGGATGACTTCCGCGAGAAAACCCAAGGTGGCGCCGACTTTGAGGTG  
CTCGCTCAGTGCGCCGATCGATATGGCGTATCACTGACTGCTGCTGCATTGCGCTGG  
ATCGACCACTGACCAAGTGCGCCGTGCTCATCTCACACACCGATGGCTTCATCAAT  
TGGTCGGTGTGAGCAAGTCAGCTAGAGCCGGTGGCGCCTTTTTTCGGCCGCGCAGA  
AGCGTGGTTGCAATTGGCCCTCAAACCTCTAGCGGCCAACGATCAAATCATCCACGA  
GCGATTAGGTATGGAGCTTCCGGCCAATGCATGGTTCGAGCACGCCGAGGATGGAC  
TTAGTCTCAAAGAGATGAAGATCACTGCCGACCAGTTCGACTACACCCTAACCCCTCC  
TCCTGCTGCCCATGCGTTCACGAGTTTGGGAGCCGTGGAAAGGCTAAACACGCTTGA  
CAAGTCTGATTTTTTGGCCTACCAAAGCATACCCACCGGAGGCCTGAAATGTTTTTTC  
CAAGCTTGCAAGACGCCAACGATGCCATCGAGCCGTTTGGCATGAGTCTGACCCGG  
GCTGGCGACGGGGTCGTTCTTGAAGGAGACACCAGCTGGCGTGCATGGCGAGCGGG  
AAGCGAGTCTGCTCGGTTTGAAGACCTTAGGACATTTCTGGGCCGAGTGGACTTGGTA  
TATCGCCTTTGCGCTCGAAAACGAACGGCAAAGATCACGCTTCATGGATGTCTTCAT  
GGATGCGGATCTTGCAACGCAAGTCTCGTTGCTTGACGCGCTACGAAGCTACGAAG  
GTCTTGCAAGGAAGGAAAGCGATTGCGTTCTAAGCTCACTTTTAGCCGGCCCCATTCA  
TTACGACAGAATGCATCCCATCTGACTGGTCTGATCGCTTGCTCCGATGCTTTCAG

ATGACGGTGAGGGCGCCGTTTTTCGGTGGTGGAAAACCTTCTGCAAGCGATTGGTTCGTC  
GATACCCGGATGCGTTGCGCATCTATCGAGAGAGCTTGTAACGTTAGTTGGTGACTC  
GCTCCTGCGACGCGGCAATGCTATGTTTCGCGCTTTCAGATTGAGGTCTCCCCGACGT  
CCCCCAATTTTGAGTAGCGCCTCAGTTTGGAGTCCAATTCCTACCCCGAGGAGAT  
TGGACGTGAAGAAACGTTTTACTGACGAGCAGGTCATCGGCTTCTGCGCGAAGCCG  
AAAGCGGCGTGGCGAT

>CONTIG\_191\_length\_2503\_cov\_13.797980

GAAGTTCCCCGAGTTTGGGGTGGTCTTTGCAATCATGCTCATTGCCTTGTTGATACAT  
CGCGTCAACATTAACCGTATCTGTGAACGACTTGCGAACTCCATGACAGCCGCGCAA  
CGTTCTGCAAAGCGCACGATGGCGGCATGAAAGGGAAGCTGGTAATCAAATTTGCT  
TGCTCTCTTGTCTTGGTTTTCTTAGCAGGATGCAACCCCATGAATACTGGCTCTGAAA  
GACACGACACCGACTCGACCACCACCGACGGCGATCCGGTCTACCGCAAGAATCCA  
CATCCAACGCAGGCGTATCGGATCACGATGACCATTGAGGATGCGCCGGGGCCGTT  
TGAGTGGATATCAGGAACAGCGTTCTATGAAATGACGAATCGCGATGCGTGACAC  
CCATCGATCGCTCATTGGGCATGTCGACAAAGCAGAAAGAAGATGGGATTCCCATC  
AATTCGAAAAGGTCAACGACACCACATACGTGGCGAAGATTTATGCCGATGGCAT  
GGTCGATGCGGACTATTACGGGAAAGGCACTTGTCACTGGGAACTAACCAGTGCGG  
ATGTATCTTTAAAAGCAACGGGCAAGCATGAAGAAACCAGATTCCAGCCTGGTTTGT  
ATAAAGACAAGATATTAATAATCAATTCCTGGGGTAACCTATTTCTGGAAAGGGCGCT  
ACCCAAGGGAAGACATAGAGAATTTCCCGGATAGCGGCAGAGTCAGTGTTGACCAA  
TTCAATGATAATGCTCGCGACAATATCTTCAAAGTCACCCTGACTGCTGAAAAGGTG  
GTCCCATGAGCCTCACAAGCCAACAATACGCAGCGCTTGCAAAAGATAGTTATGAC  
AAACCGCCTGAGACAGGTGAAAACAGTCGAACCGTCGTGATAGGTGATGTTTCATA  
CAAGCGCCTTGAGTACATAGATAGTCCTTCAGGCTATCAGGGGATTATCTACCGACG  
GATCGATACCAACGAGATCGTTGTCGCCCATCGCGGCACCGAGACTGAGCGTGAGC  
TCAGGCAGGATGGTGTCTACACCGATGGCGGCATGGTCGCAGCACGTACAAACCGC  
CAAGCCGCCGAAGCAATTGAGTTGACCAGACATGCGTTGGTCTATTACAAAAAAT  
CGGTAAGGACGGCGAAGCACCAGACGTCACCGTCACCGGCCACTCCCTCGGCGGCA  
ACCTGGCCCAAGTCACCGCCCACCACTTTGGGCTCAAGGGCGAGACCTTCAATGCCT  
ACGGCGCGGTTAGCCTGGACCGGCGCATTCGCGAAGGCGGTACCGATGTCATCAAC  
CATGTGATGGCCGGCGATGCGGTGAGTGCTGCCAGCAAGCATTACGGCCAGGTCAA  
GCTCTACGCTACCCAGCAGGAGATTGCTACGCTGGAAAAAGCCGGTTACGCTAATG  
ACTGCAGTCTTTTGGACGCTCGCAATCCAGCTGTCGTCAAACCGCTCGCCGACTCGC  
ACCGCATGCACAACTTCCTGTCCGTGGATGCCTACGACGCCCCAGACCGCTCGGTGC  
TGGAAGACCCCAAGGCGCAGCAGTTAGCCCGTCAATACGCGCCGATGATCGACAAA  
TACCGCGATGACGTGGAGGTGTTGCGTGGTGGCGTAACGCTTGGTGCACGCGGTGGT  
TATGGCATGGCCGTCGATGCCATCGACCGTTTACGCGGCCCTTGGAACCGGGGCC  
GGAACGACAGAGATGGCGGGCGGCACGCTGGCAAGAAGTGCAACAGCACATGCAAA  
GCGAAAACGCCCCGACGTATGTCGCGCCCCGGCTGGAAGATGCCTATGGGCTCATCC

GGCAGCGAAGTGGATGCACCGGCAGCGCCGCGTGGTCGGCTCGGTGAGCCTGTATC  
CGCATCGGTTCCCAACGATCCGCTTTATCAGGCCATCCACAGCAAGCTCCCCGCCGG  
CACCTCGCCGGCCGAGGCCATGCATGCCACGGTCGAAGCCAAGCGTGTGGGTATCC  
TGAGTGTTCGATCAGCTGCAAAGCGTGACCGCGCATCAGGACGCTGTGTGGATCGTC  
GGTCAAACCCCGGGCTTCCGAGTCAAGGTGGACTTGTCCGAGAGTGTGCCTCCGTTG  
CAGGAAAGCATCCGCCAATCACAAGCCTTGGATGCCCAGCGGACGCAGCCGGACGT  
AGCTCAGCAGTCACCAGCGCGTGTGCTTTAAGGCTCTGAACTGCCACGTTGGCTCGA  
CGAAAACGGCTACGCGGGCTGCCAATTCACGTAGACACGCTCACTAGTCCCACGCC  
TCGACATCCGTTTAATACTTACGGCCGTGGCTCTGAGGTAGACGTGAACGCCACTG  
GCTCACACTCAAGCACACCAATGAGGGGTAGACCTTCAATCATCAAGTGAAGTGGA  
TGCGTCCGTATGGGTCGGCGGTTGTAAGTTTCTTTCCCGGAGCGTCAGGTATGGATT  
GTTTGGCGGAAGCTCCCCAAATACACCCTGCCAACGCTCAAGCAGGTAGCCGTGGA  
GCCGTCGCGATTTGCGAGGTC

>CONTIG\_192\_length\_2500\_cov\_17.164349

TGTTCCGTCGCTTGAAAGGCTACCGCCGGATTTTCTCGCGCTTCGAGAAGCTAGATG  
TCATGTTCCCTTGGAATCCTCAGCTTCGTCTAGTCGTTGATGGGCTTCGGATGTGTTA  
ACAGGCCCTAGTAAGTGGATCGTCTACTACAAGAACGCCGTTACGGATACCCGCAA  
TCGGATCGCGTGACACTGTAGAAGCCATAAAGCCACTGACCTCTGCAGTCTGTGCAG  
AGAAAGGACATGTTACCGTTGTGCTGCCTCGCCGTTGATGGCAGCACCAACCCGATA  
TCCTAACTGTTGGGGTACCAAATCCCCAGAAGATCGCTGCTGGACCAACACTTCCAC  
CTGCAGCGGATTGCTCACGAGTAAGCGTCCGCACGTCGCCTGTACGCGTGTTTCAGTT  
GATAGACGAGGTTTCGGATCCAATTCATGCAAATACTTTAGTCCAAGCTTTTTGAGGA  
TCACCCCGGTCTCCGGATGCTCTATAGCCATCTGGGAAGAAAAGTTCTTGGAATCTTG  
CAATGAGTTCGGTGCTGGATAAATTGCGTGCCTCTTGCAACTGAGGTTTCAGCCCACA  
CCTTTCCCGCTGAGCTAATGCCTAAGCTAGCTGCTATAAACAATAATTGCATATTTATT  
CGCTTTCACGACAACATCTCCTTGTGTGATAGATCGTATTGAATTGACAGACAACC  
ATCTGTCATTATTACCCAGTATGGGCAATTCCATTGCCCCGAGATTAATAGCCTCTCG  
GTAAATTTTACTTTATTGAGCTGGGACGAAAGGAAGCTCGGCCATAAGCCATGCTGC  
CGCTTGTTATCATAAATCCATTTTCAGGATCCAACCTCATGACGGTCATCAGCGTCAT  
ATTGCATCAGCATAAAAAGGCTATAAAATGCCTTGTCGAATATTTTCATGACAGCTA  
GATGTTGAAGCATGACCTCTGGAACATGACCCTTTAACTTATAAGCCTTTCAAAT  
AATCGGGGTCAGTTAAAAGGTTTGCGGCCTCAGCAATTGCACCATGTAGCTCGGAG  
AGATCAGTCAATGCCCCGCTGCTGTAGCGGCAGCGTGGACGAGTCCTGCGCAATCCG  
AAATGCGGCGCTTACGGCATCCCCCGCAATTCTTACTAGCTTTGATACCCGCTCAGT  
AGGATCATCAACCTTGTTAAGGTCTTCGATCTGATTTTCGTAGATGCTCGAGATCCTCT  
GGAAAACAGCGGTCCATCGCTTCCTCACAGGTAGTTACTTTTTTCGGTTTTTTTTGCGAA  
CGCCATTCCCATATAGCTAGCAGATCACACTTATGCTTCGTTTACAATCACTGAAAA  
GCAGCTGCCCCGTTAGAGCCATGCCCCAGGCTGGCCGTGCCTGGCTCTGATCTTAGCG  
CTTCAAGCACGGAGCGATTTTTCATAGCCAGCGGATTCAACTGAAAGTAACTACATA

CAGCCTAACGAACTCATTGGCACGCTTACTTGCCTGATGCTTGATTTCGAGCTAAGAA  
GCGGCTTCGGTTTAAATCCATTACTAGGGGCGTTGCCGGTACCATTGACCATCTGCG  
CCCATGTCTACCAAGACCTCTGCACCCAGGGCTTCAAGAACATGCATCATCGATTGG  
ACGTGCTCTACAGATACGTCATGGATCTCAACATGCTCGCGCGCGAGTACTGAATCT  
TTCGATTTTCCGGCGCTGTGCTGGGGATGCACTTATTCCTCGCCGAAGGCGGGCGCGC  
GAACTCAGCAGCGGGCGTGCACCTCCCTCAGATCGCCATTGAACGTCATCTACTCGCCA  
CCCAACCACCGAGATCGTTGCCATGCGCGCCTAGCTGCTATCAGACCGCCTAAGCGC  
GGTATAGCGCGATCCTCGCCGAGTCGTTACCCGAGTCAATCGCTCCACGCCTCCGT  
GGCCAACGCCTGACCCCTCTGCACGGTCACATGCCTTATCGAATTCCGACTCCAGGC  
TCGCCGGTTGTGCGACGGTGCTTTATGGGTGCGCCGTGGCTGTGCTCCATGCGCCGGT  
CAAGGATTGCACGCACGGCATGGGCCGCATCGAAGATGGCTTGCCCCAACGTGGGC  
AGCGTCTGCGCCTCAAGGCACTCCGGTTTGCTCATGGCGATGACGTCGCCATGAGCG  
ATGAGGGTGCGTAGCAGGCGGTCGAGCTGGTCGTGTTGGTCCAGCGTGAGATGCAA  
GACAACGGCGGGGTGCTCCATCTGTGTCTCTCTGCGCGGTGAGCGGGGAGCGCG  
CACGGTGTGGCGATTGGCGCGTTCGCGCTCGGCGCGGGGCGTGCGGGTGCGTGCTGC  
GCGTACGCGGCGCACCTGGTTAGTCCGTAGGTGCGACGCTGACGACCAGCTCGCCA  
TCGCGCATGCGGATGTGCAGCTTGCTGCCGATGGCAAAGCCCAGTTGTTCCAGCCAG  
CGGCCGCGTAGGCGTAGCGTGGGGATGCGTTGGTCGCTGGCGGGGTAGTAGCCGTA  
GCCGACGGTGCAGTGTTGCGGGGCACGCGGGTGGCCGGGACGCGGGTGGGCGGGC

>CONTIG\_193\_length\_2494\_cov\_0.250951

CCTTCTCTTCTCTCTTTCTTTTCTTCCCCCTTTTTTCTCCTCTTCCCCCTCTCTCTTTTCTC  
CTCCTCTCCCCCTCTCCCTCTCTCTCTCCTTTTCCCCCTCTTTTCTTTCTTTCCCTCCCTCC  
TTCCTTTTTCCTCCTCCCTCTCTTCTTTTCCCTCCTCTCCTTCTTTCCCTCCCTTTCTTCCC  
TTCCCCCTTCCCTTTCTCTCCCCCTTCCCTCTCTTCCCTCTCCTCCTTTTTTCTTTTTTCTCCTT  
TTCCCTCCCTTCTCTTCCCCCTCTTCTTCCCCCTCCCCCTCTTCTCTCTTCTTTTTTTCTCTC  
TCCCTTCTCCCTCCTCCCCCTCCTTCTCCCCCTCCCCCTCTCCCTTCCCTTCCCCCTCCT  
TTCCTTCTCTTTTTCCCCCTTTTTCCCTCTCCTTTCCCCCTCTCCTTTCTTTCCCTCTTCTTT  
TTCTTTCTTTCTTCCCTTTTCCCTCTTCTTCCCTCCTCTTCTTCTCTCTTCTTCCCTTTTTCCC  
CTTCCCCCCCCCTCTTTTCTTTTCCCTCTTTTTTCTTTCTCTTTTTCATCCCTTCTTTTCCCT  
CACTACCTTTTCTTCTCTTTCTTCTTTTCTCCTCCTCTCTCCTCTTTTTCCTCTTCTTTCT  
CCCTTCTCCTCTTCTCTCTCCCCCTTCCCCCTTTTCTCCTCTTCTTTCTCCCTCTC  
CCTTCCCTCTTTTCTTTCCCTCCTCTCTTCCCCCTCCTTCCCTTTTCCCCCTTTCCCTTCTCC  
TCTCCCTCTCCCTTCTCCCCCTCCTTTTCTTTCTTTTCTTTTTTCTCTCTTCTCCTCCCCCT  
CTCTTCTCTTTCCCTCCTTCCCTTCCCTTTCTCTCTTTTTTCCCTTTTCTTCCCTCTCTCCTTC  
TCCCCCTCCCTCTCCCTCTCTTCTCTCCTTTTCCCCCTCCTTCCCTCTCCTCCCCCCCCCTTC  
CTCCCCCTTTTTCTTCCCTCCCTCTCCCTCCCTCTCCTTTTCCCCCTTCCCTTCTCCCCCT  
CTCTCCCTTCCCTTTCTTCCCTCTTTTCTTTTCTTCCCTCCCTTCTTCCCTTCCCTCTCCTT  
CCTCCCCCTTCCCCCTTCTTTCTTCTTTTCTTCCCTCCTTCTCCTCCTTCCCTTTCTCCCTTT  
TCCTTCTCCCTCTTCTCCCCCTCCCTTTCTCCTCTTCCCTTCTTTTTTTCTCTTTCTCCTTC

CCCTTCCCCCTCCCTCCCCCTCTCCCCCTCCCCCTCCTCCCCCTCTCCCTTCTTCCTCTCCTT  
TCCTCCCTCCTTCTCTTTCCCTCTTTTTTTCTTCTCTCTCTCTTTTTTTCTTTTTCTTTCT  
TCTTTTCTTTTCCCTCCCTTCTTTTTCTCTTCCTTTTCTTCTTCCTCTTTCTTTCCCTTCC  
TTTTCCCTCTCCTTTCTCTCCTTTCTCCCCCTCTTTTTCCCCCTCCCCCTTTTTCCCTCTCT  
CCTCTTCCCTCCTCTCTCCTCCCCCTCCTCCTCCTTTCCCCCTCTCTTTTTCTTCTCTTCC  
TCTTCCTTCTTCTTCTTTTTCTCTCTTTTCTTCTCCTCCCTTTTCCCTCCTTCTTTTT  
TCCTTCTTCCTTTTCTCCTTCCCTCCCCCTCTCTTCCTCCTTTTTCCCTCTCCTCTCTTCTT  
TCTTCCTTTCCCTCTCCTCCTTCCCCCTCTCTTCCTTCTCTTTTTTCTCTCCCTTTTCCCTCCTC  
CCCCCCCCCTCCCCCCCCCTTCCCTCCCCCCCCCTCTCCTCCCCCTTCTCTCTCCCTCTCCCC  
TTTCTCCCTCCTCTCCCCCTCTCCTCCCCCTCTTCCCTTCTCCCTCTCTCCTCTTTCTCTCC  
TTCTCTCTCTCCCCCTTCTCTTTTCCCTCCTTTCTTCCTTCCTCTCCCCCTCCCCCTTCCCT  
CTCTCTCCCCCTCTCCTCTTCTTCTCCCCCCCCCTTCCCTCCCCCTCTTTCTCTCCTCTCTCC  
CTCTTTCCCTTTTTCTTTTCTTTCCCCCCCCCTCTTCTTCTCCCTCTTCTCTTCCCTCCCTC  
CCTTTCTCTCCCTCTTCTCTCTCCTCCCCCTCCTTTCCCTTCTTCCCTCCCTCCCTTTCCCTC  
CCCCTTCTCTCCCCCTCTTTTCTTTCTTTTTTCCCCCCCCCTTCCCTCCTCCCCCTCTCTCTCTC  
CCCCTTTCTTTTTTTCTTTTTCTTTCCCTCCTCCCTTTCCCTCCCCCCCCCTTCCCTCTTCCTCTC  
CCCTTTCCCTCTTTTTTTCCCTCCCCCTCTCTTCCTTCCTTTTCTTCCTTCCCTTTTCCCTTC  
TTCCCTCCCCCTTTTCTTTCTTTTCTCTCCTCTTCTTCCCCCTCTTCCCTCTTTTTTTTTCC  
CTCCCCCTCTTTCCCTTTCCCTCCTTCCCTTCTTTCCTTTTTTTTTTCTCTTCTCCCTCCTTCCTC  
TCCTTTTCTCTCTCCCCCTCTTTTCTTTTCCCTTCCTTTCTCTCTTTTCCCCCTCTTCTCTCCTT  
CCTCCCTCCTTTTCCCTTCTCCTTCTTTCCCCCTCCTCCTCTCTTTCTCCTTTCTCTCTTCC  
CCTCTTCCCTCCTCTCCTCCTCTTTCCCTCTCCCTTTTCTTTCTTTCTCTTCTCCCCCTCT  
TCCTCTTCCTCCTCC

>CONTIG\_194\_length\_2491\_cov\_19.606176

TCGGCGACTTGGGAAATACGCTGTCAGGCGGTCAAAAACAACGGATCTTCTTGGCC  
AGAGCCTTTTACAGGCGCACCAAGTTGTTGTTGATGGATGAGCCAACGACTGGGGTT  
GATGAGCAGATGGGTATACAGCTGATGAAGAACATCAGGAGCATTGGCGCGACCAC  
AGTCATCGTGACGCACGACAAGAACATCTCTCGGATGTGCGATATGCACTATCTCTT  
TGTGGGCGGGATCCTAAGGCCTTTGATCAAAGAGCAGCCCAGCAAATTTGAACAGG  
ACGAGGCCGGGGAAACGGCTGAGAAGTCCAGTCGACAATGAGGAGTTACAACGCTT  
ATCAAAATAAGTTCAAAGGAAAAAGAGATATGGAACATTCAATAGGAAAAACGATC  
AGGAAAAAAATCTACTCACAGGATGGAGCGCTGTAATGAGAGAATTGACAAACGAA  
GAGCTGTTCCTAGTGGCAGGTGCAGCGGCCGCTGCGGACGTCGATCCAAGCGAACC  
TCCCCTGAGGTTCCGCCAATTGTAGTGCACCCTCCATCAGACCCGCCGCCGACTAT  
CCCGCCATCTCCGCCAGTCGAGCAGCCAACCTCCGATCACGCCACCTGGCGGCGGGA  
ATGGTGGTAATGGCTTTGTCCCGTTAGCTGCCGAGAACAGAATCGACAACGCCTTCA  
TTGATAGTGTGTAAGGTGGGCAACAGCTAACCGCATATGTCCCTACTAAAAACGGA  
GTGGCCATAGATCGAAGTGGTGTGACTGTGGCAACTGGCGTGGACTTGGGCTCTCAA  
ACCGTCGAAAGTCTCACCGCTCTGGGTGTAGATCAGGCGCTTGTTAACACGTTAAGT

CCTTATCTACATCTTACCGGGCAAGCTGCAATGGATGCTATACAAAACAGCCCCTC  
AATATCACCGAGACGCAGGCAGATGTGTTGGATAACGTAGTTAGAACCAACATCTT  
GAATACCGTTGTTAATAACTATAATAATTCATCTGACTATGCTGATTTCTATCAGCTG  
CCTGCTGGCGAGCAGACTGCTATCGCCAGCGTTGCTTACCAGTATGGGCCTGGCCTT  
GCCACAGCAACCCCCAATTTTTGGACTCAAGTAACAACGGGACATTGGCAGGATGC  
CGTTACGAATCTGAACGACTTTGGCGATGCGTATGATACAAGGCGAGATAAGGAGG  
CCGCACTCATTGAGCAGGATATTACGAATGGCAGCGTGCCGGGTGGCGGTTAAATCT  
TGACTTATTTAATGTGAGGTGCTAAATGAAGAATAATAAGAGAATTGTATTAATCAC  
GCTAATGATCTTGGCGTTATTGGTAGGCATTGCGGCCACAGCTTCGCCGGCAAAAAT  
TAATGCTGGTGTCTTGTGCGACTTACTTTGGTCAGTCAGCGGGTGACTATATTGTTCCC  
GGAAAGCCCCTGGTTCAGCAGTTTGGAGAAGCTCTGAGTGGTCCGCCGAATAAAGA  
TGTTGATGCCGGGAATGGCTTGACATTGATATCAGGCTGCCGATACAAGAGCTGCAT  
CGAGAAGGGTGCGGTTGCGATTAAGAGCGATAACACGGTTCGAAGCCGCTGGGCTCA  
TACACTTTAGTTGCAGGGCCGACACTAAGAAGTCGGGCGCCTCTTGCTCAAAAGATC  
CTACCTTCACGTTGTTCTGCGCCGAGGAGTAATAAGAACCTAGATGCAGAGATATCAG  
TCCTGAGGTGGGCGCATGAATACGCACCAGATGCTACTTTTGAAACAGTTACGTTAG  
AGAAATGACGGAAATATGCCAAAAATAAGGGCGGACAGAGCCATCATTTTCTTGAA  
ATGATTTGAATTCGCTATCCCTATCTCCGTGTGAGGCCGCTTCACACGGGGGTATTAT  
TTATTTTACTAGGGGTTAATTGAGAGTGCTGTTTAGAAAGAAAAGAAAGCGAAATA  
GTGATTTTCTAATCCAAGTATTGCATGGAGCGCTGTGATGAGAGAGCTGACAAACGA  
AGAGCTGTTCTAGTTGCAGGTGCGGCAGCCGCTGCGGACGTCGATCCAAGTGAGC  
CGCCCACTGAAATTCCTCCAATTGTGGTGAACCCACCCCCGAGTCCGCCTCCGACTA  
TTCCTCCTTCACCGCCAGTTGAGCAGCCAGGGCCGATCAGTCCTCCAGGTGGGGGCG  
GCACTCCTCCTCCAACAGCGCCGGAATACGATATCAACTTCACGCGTGCGTTGACAG  
CGGAAGAGTCTGCCGCTCTGGTTAAATTTGACGATGCAATCTACTTTGTAAAGACT  
CTATCAGCTCGCTTCCTGATAACGCTTATATGCAAATGAGCGATGGTTCAACCGTGC  
AGATGTCTGAAATCAAGAGTCTGATGCTTAATGCAGACTATAAGGTAAACGAAGCG  
GGCACTAGCTATAGTAATGGGTTTGCGACTGGGCAGTCCGACTATAACAACGGCGA  
CCCACAGATATCAATAAACATTGACACCATCAAGGGGTATTCCGATCTAATGGGAG

>CONTIG\_195\_length\_2484\_cov\_6.153585

GTGATGCAATAGATTTCTGCGACTGGCTTATGGCCATGCCTGGGTGCCACTGGAAC  
CCACATGACGGGTGGAGACCAGCATGGGTCCATCGAAGCTCGGCATGAAGATGGGG  
CGAGTCGCCACGCTAGATTACCTGTTTCCAGTGAGCATGGTCAGAACGGCCATTGAA  
AAATGATGGAACCTAAGGTAATGGCTGTGCCCTCGTGGATTGAGCGAAGTCGCTGCT  
GAGCTGCAGCATCATGCACTGCAACGCCCATAGGTATTGTATAGGAATCGGGCTA  
AAGACCAAGACCTCGGCTTGGGGGTGGTTCGGATACTGAGCGTCAATACCTAAGCTT  
GCTCGGGTTTTGTGCTCCAGTCTTCAAACATCCGTTGAAATGCTGCTAAACCTTTGC  
GCTGATCAATTGGAAGGGCGGTGACTGCGCCAGCAGCAGCGTTAGTCACACAGAAT  
GCGCATGGTAGCGTCCAAAGCACAGAGGGCTGGACGCCAATCACCACCCATTTCTC

TTCGGGATTGTTCTTTCTGAGTTGGTAGAACATCTTATAGTTAGGAGAACTAATCGA  
CAAACAAGTTGCCAAAGTTCCGTCAAGGCGATGCTCATCGTTGAAAACGGCATCTGT  
TCCTGCAATAAGGTGGTCGCGACACAGGAGTCCACGATTTAGGATGGAAGATAGAT  
TTGCTTCTCGGGTGAAGTGGACTAGATGTGTGATGCCGCGTTCTGCGACATACTCCT  
GAATGTTTGCTGCCATGTTGACTCCTTTCAATCTGCCTGTCAGTGTTTCGAAAAAAGCT  
AGACCTTGTCTGCCTTCCATACACGGGATTGCAGAGTTTGTATCGGCAAACCTTGG  
GCAAACCTTAAAGCGGTGTTGATCAGCAGGCAATTGCCGGGCAGCGATACCATAGAG  
CCGCTCATACGAGGGGTGGAACGGGAGGCATGCAGTAGTAGTCATTTCTGGTCCTTC  
GGTCCCAAATCGGCTGAAGTCAACCGAAAGGATGCCTCAGGGGGCTAGGCGAGGCT  
GAACGATCGCGCGACAATCGCAATAAAATTTTGGGAAGTATACCGCCTGCTTTGCAT  
TAGAGTTTTAATAAAGGTTTGGAAATCTGCTTACTAGGAGGGAAATATGAATCCAAT  
AGCTATTCCGTCAGAGAGAACTATCGAGTCGATCTCGAACCATTCCATTGTGGAAAT  
TCTAAATTTTGGCAAGGGGGCACCTCCGTATGCTTGGTGTTCGTGCCATCCCAGGTT  
GAAGAGGCAAAGCTTGGTTACGACGTATCTTTGGAAGGAAAAAAGCAGGTGGTGGT  
GCAGTATAAGGCAATGAGGAGTTCTGGAAGTTTTACTTTTGATTTTGATCAATTGTG  
GCTGCTTCTGGTAAATTTTCCGAAAGCTGATTTTCTTATGTGTTTCTTTTCGGGGAGT  
ATAGCGGATTCAAACCTCTGTTCTTAAGGGTGATCATGCCATTTCTGTTAACCGTTATG  
AGTCGTTTCGATAGAGTCTTTTTTATTGATGCATGGGAGGTTTTAAATAAATTGGTCCA  
GGCTGTTGCGCCAGGCAGTGCTTCCGTAAACGTGCTTCAGCCATTCAATTCCAGGCGT  
ATCTAGTCAATTTACTTTAGCTCAAAGCCACTTGCCTGGCGGCACACCGAAATTCAT  
CTCGACTATAAATAAAAGTGCGAATATTTCGAGGCCGTATAAACGTGCGAACTGGTTT  
GTCCATCCCCTCTGCAACTGGACCTTCTAAGATAACTCCGCCATTTTCTGCGACTGCG  
TGGGGCACAGCTTTTGTGCAGGAGATAAGTAGTTGTAATTTTGGTCTTAGATTAGGG  
GGGGCTGATGAGCGTGAAGATAAGGGGGGCTAATATTAATGAGGGGGGTGTTACATCC  
AATTAGCTCGGTGGCATGTTTTATATCTCCCATGAAAGGTCATCCGTGAAGGTCGAC  
GGACAACCTCGTTTTATTGCTACTAGAAAAAATTTAGCTTTCGCTCAAGGATACACC  
TTTGCCCCCTTTCCTCAACCGCTCCTTGAAC TGCCACGCACATAGCTGGGCAGCGTC  
ACAGCCGGCTGATAGTGGCCTAATGCTTCCACTTGGATCTTCCGGGTGTTGCCGGCC  
GATTTGTGGACATAGTTGTCTGCAGAACGGGCGCCTTCTTGTTGAGGGCATGGCCT  
GTGATCAAAGCGATGTGCTCAACCCTCACGCCTTTGGCGTCGAGCTCGGTAGCCAGG  
GTATGTCGGAACGCGTGAGATCCAATGCCCTTGCCAAAGCCTAAGCCCTTCAAATAG  
AACGCAAATTGGTTCACGAAGCCTTGGCTGTAGCGCCCGTTTGGTTCACCCGTCTTG  
CGGCAGGTGCCTGCTGACAGGTTGGGGAAGAGACGCTTGTGGCCACTTGCCTTGATG  
TCCGCCAGGAAGTCGAGAAAGCCCGCCTGGATGAGGCTTGGGTGGATCGGCACCTT  
GCGGATCGCGCTCTTACCTTTGAGGCTTTGCCGACTG

>CONTIG\_196\_length\_2407\_cov\_27.542105

CGCTCAACACGCCGTCGCCCCGGCATCAATGAGACCTTGCAGAAGACAGAGGCATTG  
GATCAGCAGCGGGTGCAGGAGATGGTGCAGTTCCAGCGCGAACGCGAAGAAATCGA  
CAAGAACCCGACAGGCCCCCGTCATGACGCTTGCTGCCCACTCTCAGCAGCAGGTGA

TGTCTGGCGGCGATGGGGGAAGTGGTGGTGATGGGGGCGGTGGCTGACGCATTGAG  
CGTAGGATTCATGCTTTGACCGAGCAATGTGTGGCTGCGCTTTGCGCAACGCACCTT  
CGCTTGACGCAAGCCTTGGTTGCTGAAAAAGCAATAGCGTGGAGCTTGCGAACTTA  
GGTTTGGCGCCGATGCCAACGCCAGATCAACAAAATGCAAATGTAATTTTAATGTCT  
GCGTGGGTAGCCTCAGCCCACACAAGTTGTGCAGTAGATCCCGAAGTGTAGGTGCT  
ATGGATAGCGAGTCAGGTCAGACGGATGACGCAGAACAACCGCTCTTTCGCAAGCG  
AAAGGGGCCGAGACAACCTCCACACTCGGCGACCTAAAAGATGCGTTTCCTTCGT  
CCATCCGGATCTGGATTGGCTGTGGGTGTGCGCTTTTCCTCTTGCTGGCCACGTTTGT  
TCTGACCGCGTCTTACTCCAAGCGGGAGCACGTGTCGGGCCAGATCATTTTCGACGCA  
TGGGCGAGTGGATATCCGCAGTGGAACGCCTGGCCTCATCCTGTCGACGACATTGAA  
GCCCAATGCTTTGGTCAAGAAGGGCCAAGTGCTCGCCGAGCTATCAGCCGACATCA  
CCGACGAAGCGGGTCGCTCTCTGTCCGATGAGACGATCAAGCGTGCGCTCACCCGA  
TCAGAAGAGCTGACCAAGGAGCAATTGCAGACGCATGACTTTTCCGGCCAGCGCGA  
GCGGGAAGTACGCGTCAAGTCGAAGAAACGACCGGCGCGATGCAGGAAGTCGCTC  
GCAAGATCTCAATCTTGGAAGAAATACGCCAAGAACAAGAACTCTTGAAGACC  
ATTGAGCCGCTGCTTGCTGAGAAGTATGTGTCCAAATACACCTACCTCACCTACGAA  
AATGCTCTCTTGATGCAGAAGCGGAGATCCAGGATGCCCCGCGCGCAGCAGTCCAC  
ACTTCGTAATCAGCGTGCCGCATTGCTGGGTGAAATCACCGAGATAAAGACAACCG  
CCAGCAGACAAGCGAGTGAGATCGAGCGTGAGAAGTCCACGATCGAAGATCAAGTG  
GCCAGAGCCAAGTCCGACCGGCTGCAAACCATCACTTCACCCTTGAGCGGCACCGTT  
GCAGCAATCTATGCATCCCAAGGTCAGCGCATTGGCACCGACTCGATCATCGCGTCC  
ATCACCCCAAGCGAGTCGGTGTTCGAAGCTGAAATTCTTATTCCTTCCAGGGCCATC  
GGACATGTGAATGTCGGCACCGAGGTGCTGCTCAACATCGCCGCATTCCCGAAAGC  
AAAATATGGCGCCATCCAGGGGCGCATCGCATCGCTGTCGACGCAAACGAGTCCCC  
TCGGTGAGTTGGAGCGCCGCTATGGTCGCCAGTCGCCCACTGAGCCGGTTTACACCG  
CCAAAGTCGCCTTGCCTTCCCAGACCATTGGAGTTGCCCAAGAAGCGAAGTCCTTCC  
TGCCGGGGATGGAAGTGGACGCGGAAGTATCTTGAGAGGGCCGAAAGATCTGGGAG  
TGGATGTTTGACCCCTTCCAAACCATGGGATCACGCTTGACGGGTGAAAAGCGATGA  
AGGACGTCTTGACGCCATCAGCCAATGGCGATGCCGAGACGGATCGCTCTGCTGAA  
CCAAGCCTGGTGTTCCTCGAAGCGCAGTGTGCCGCATATCCGCCAAACTGAGTCG  
AGTGAGTGCGGCCTGGCCTGCATTGCGATGCTGCTCTCCTACTACGGCCATGAAACG  
AGCCTTGGGGAGCTTCGCAACCGCTTTACGGTGTCAACCAGTGGGGCAACGCTCGCC  
TCGCTGATTGAAATCGCTGATGCCAACGGGCTCACAACGCGTCCGCTTCGCTTGAG  
CTCTACGAACTGCCCAAGCTGTGCTGCCTTGCATGGTCCACCTGCACCACGGGCAC  
TTTGTCGTGCTGACGGCTGTGCGGGGAGGGCACGTGCACATCAGCGATCCCGCAAC  
GGGTGTCAAAAAAATCAAGCTAAATGAGTTCGATGAGCTCTTTAGTGGCATTGCGTT  
GGAAGCGCATCCTGGTCCGGCCTTCAAGAAGATCAAGAGCGTGCCATCGGTATCGC  
TTCGCGATCTGGCAGGCTCGCTTCGGTCCCTGGTGCCCGCGTTCTGGGGTGTGGGCA  
TCTTGGCGCTCTTCTTGGAAGGCTGTGCGCTGATTGCGCCGCAATATCTAAGACTGA  
CCATGGATCAGGTGCTCAGCGTCAAGGACGATGG

>CONTIG\_197\_length\_2340\_cov\_146.460009

GTTGTCCTGCTGCTGCAATGGCTGCTGGACGATGTGTGGCGCGGGTTTTTGGCCTTG  
CTGTTCCGGTGTGGCGGTGCTGGCCTGGACCTGGGGGGCCGCGCGACCTGGATCGCGAT  
GTGGAAGCGGTGATCGATGCCGACGAGCCCGGCGCGCGTCGCGATGCGATTGCGCA  
GTTGCAGGCAGCCGGCGGCAGCGTGTCATGAAGATGCGCCGTCGCTGGTGGGAAGCGG  
TGGTGGTCAACGGCCTGCGGCGCTGGTTTCGCAGTGTTGTGGTGGTTTTTGTGCTGCTGG  
GGCCGTTCCGGGGCTGTGCTGTACCGGCTCACGGCGTTGGCGGTGGAAAGCCCGCTGT  
CGGTACTGCTGCCGCCACGCAATCTGGCCGGCGCGCGTTGGCTGCTGGCCGCGCTGG  
AATGGCCGGTGGCGCAGTTGATCACCGTCTCGATGGCGCTGGTGGGCAATTTTCGACA  
CGGTGTTCCGCGCCTGGCGGCAAGCGCACGGCAATCGCTGGTCGTTGGAGCCGCAC  
TTCTTGGGTGCGGTGGCGCGTGCCAGCGTCAGTGCCGAGCTACGCGAAGAAGCGCA  
CGACTACACCGATTCCGGGGCTGGTGCCGGTGTGGCGCCGCCTGCCGGAAGTGCGCG  
ATGCGATGAGCCTGGTCTGGCGCGTGCTGCTGCTGTGGATGGTGGTGGTGGCGTTGC  
TGGTGATTGCCGGGTGGGTGCGCTGAGCTTTGCTCGGTGTGTGCGACGGTACTTCGC  
TCGTAAGCGATTGATTGCGTGTTGGCATCACAGAAAACCTTTCTACTGGCGCGTTCTG  
TCGTTCTAAATGTCTTCTGCAGGCTTCGTCGTTGCTAGTAGCCACGTTGTGGCATGCC  
AGTGCGCTGTCCGTTGCTTATGTGGCCTCACCTTAGCCTGGAGCCAGTAAGATAAAG  
GGTGGCCACGGTAGATTTCTTGCCACCCAGAACCCGGGCAGTAGCGCAATCCAAAG  
CCATGGAGAGCCAAACAATTTGGCGAGCGGCACCACGCGCTTTGGCTGCCACCCGA  
GATGCCACAGCAACACCCACGGGACTAATAGCAATAGTCCGACCGCAAGAGCATTC  
ATTTTGACTGCTGCGACTATATCGCCATGTGCCAGCGCATGCAGGGCACGGGTGATG  
CCACATCCAGCACAATAGAAACCCGTTAATGCATGAAAGATGCAGGGCGGGGAACGG  
ATTTCTTGGAAGATTTGGATCAAACCTTCAAAAAAATCCAAAGGCTCGCACCAGCTGC  
CACTGCAGCTGGTGCAGCGAAAGCTGGAGCAAGCGCTTGGACACGCTTATCTCGA  
CTGTTTCGATCTGCTGCTGCATCTCAAGAATGCGTGCCCTTGTAGCCATCTACACCAAG  
GCTGGCGATTGAAACTATCCAAAGAAGTAGTCCAAGCACAAAAATGGCGGTGGTGA  
CCCACGCCAATATTTTTGCAGTGCTCGACGCCTTGACCGCCCCTGGAATATCGCCCA  
CGTTGAGCAAGGGATTGACCTTCGCCGCAAAGACGATCGCCACGATGCCGGTGATG  
ATGCCTGGAATCGTCCAGCATGAGCAGCAAATCAGAACGCAAAGAACCGTCATCGT  
GATGGACCAGGCCAGATGATTTCTGAATCGGCTGGACGGGTGGCGGCACAACGGAAG  
GCTGCGGATGGATCGGCGGTGGGATGGCACTCATGGTGAAGCTCCTTGGGTGGTAA  
ACGACTGCGAACTGATGGGTGAGTGGGGAGGGTTATCGGGCGCGTGCCGCAGCAAT  
GGCGACGGTCGTAGGCACGGGTACACAACGGCCGCACATGGCTGCCGGCGCGATCG  
CCGGCCGCTGCAATGAGCAGCAGCAGCCGATCACGGCAGATGCCTCAGGCGCGATG  
ATGTTGAGCACGACGACTTTCCCCCAATACGACCTGTGCGGTTCCGCCAGGCGAGCGC  
GGCGGCAAACGTGTGATGGCGCACAGGCTACTCGCGGCGCGCGACGGACGCAAA  
GCCCCGCGCTCGCCGCACTTATGGCTGATCCTGACGCAGCGCCCGCACCTGCTGTTGC  
AGCAGCGCGGCGGTGCGCTCGTTGCCGGGAACCGCTGCCGCGGCGGCCACTTCGAT  
ATGCGCGCGCATCCTGCGCGGTACGCGCATGCGGCCAGGCGGGTGTGCGGGTGGC  
TCCACATGCTCGACCACATGCCGCGCAATGTCATCGGAATCACCGGCACCTGGCGGC

GCTCGAGGATCTTTTCCACACCCGATTTGAACGGCGCAATCTCGCCATCCTTGGTCA  
ATGCACCCTCGGGGAAGATGCACACCAGCTCGCCATCGGCGAGCTGGTGTGCATCTT  
CCCCGAGGGTGCATTGACCAAGGA

>CONTIG\_198\_length\_2330\_cov\_18.675443

CTAAGGTATCCCCACGTTTTACAGCACCAACGTCATCTGCGCGCGCACGGCTTCCGG  
CAATGTGCGCAAGCGGTCCAACCACCGTGAAACAGGTTCCATCGGCCAACGTCTGA  
TCAACGCCTCGCGGCCGACACGCAGTGTGAGTAGAGCTTGCGTGTGCTGTTGCGGG  
GCGATAGCCACTGGGCGATGCCGGTAGCTTCGCATCCCAGCCCTGCCAACCAGCTG  
GCGAATGCAGCCAACGTATTGATCAGCAGCAGGATCTGCAGTCGCTCACCGCGACG  
GCTCAAGCTATCTTCCATTGCCTGACCGTAGCGATGTGACTTCAGATCACGAAACGC  
CAGCTCGATCTGCATCCTTCGTGCGTACAGGTTGACCAACTGTTTTGCGCTGGGTGCT  
CGCAACTGTGGGGAGGCAACGATCAGCCAGGGTTCGCGCTCACGCGCTGTTGCTTTC  
AACTTGATGATGCACGCGAGGCCTTGCGGGGTGAGCGTCGGTTGCGTTGCTGGCGT  
TGCTGCCGTGTCTTGGCATAGAGCACCAGACGGCAATCGAGTGGATCGCTGCGATTG  
GCCTGCATCGGTGGCAATTTCGCATGCATGGTTGGACGCCAGCGCATGCAGGCGTCG  
GCTATCGATCCATTGCGCTGCCTCATCGGACACGTCTTGCGGCTTGACCTGCGTGCG  
CCCGCGCAGGCGCCCAACCAACCAGCCCATGGCCGATACGGCGCGGAACCACG  
GTGTCCGGAAGCCGGCGTCAGTGACCAGGATCGGGCGAACATCGTCCGGAACCAGT  
TCCCTCAGCTGTTGCAAGAAGCGTCTTCTGCACCAGGCGATCCCTGCTGCTTTCCTG  
GCACCACCATGTCCAGCAAGGTGAGCGTGCGGCCGCCACCGGCACCGCTGCGCGC  
AGCAGACACCACGATTTGTCTGGCTTCAAATCGCTCCAGTCGATGACGATGACCGGC  
TGCGCGCCGCGCACCCAGCCACTGCGCCATATCGTGGTCGATCACTGATCGCTCAACC  
TGCAAATTGCGGTTACTCAGCAGGCGATCGACTGCCTTGAGCGGCGCGCGCACCCG  
CAGTGCGCCGGGCCACGAACGTGCGATGTCCATCAGTGTGAGCCTGCGTCCGTGCA  
ACAACGCCTCAACCGCATGCAGCAAGGTGCGTTTCGCGCAACGCATGCATCCCGGAC  
AGTGAGTTGGACAGGCACTTTTGCAATACTTCGCTGGCGCGCATGGTCGTCAACCTT  
CTCTGGCTTAGTCACCTTGAAGATTGCGCCATGCGCGCACTTTCTTCCAGACGATCAT  
GGCGCAAGTGATTGATCTGACACGAGTAAATGTGGGGAAACCTCAGTGGCAGGTAC  
TCTTTACGAAAGCCTGATAACCCAAATTGAACGAAGAGCAGACCCCGCAATCCTCG  
AGCTGGGTTTCGCCCTTCTGTCCATGGATGAGGAGTCCTGCCAGAGCGTTCATCGAG  
GCCTTTTAGCCATTACTCAACAAGCCAAGTTAGATGGTAAGCGTCATGACTTTGTCA  
TCGGCGTAAGCTCACACGGCACCGGGATATGCTTCCATTGCAACCCTTCGCCAAACC  
GAGACGCAATTGTCGAGTTGCAAGTACATTGCCAGAAGCGGAAATACTCACTTCAT  
GCCCCGTACATGGTTTGGTGTGTCGCTGAGCCCGGATGCTGAAATCCAATTCGGTGTG  
ACTTTAGATTTTTCGCTGGTCTCAATCGAGAGAAATGGATCAGCTGACGAAGGGTATG  
AAAGCTCCACGCCAGTGAAGGCGGCGCTGAAAACATTCGAAAGAAATATTCGCCC  
TAAGAAATGCGGACGTAACCAAGCCTGTCCCTGCGGCAGCGGAAAAAAGTACAAAA  
AGTGCTGCTCTTCCTGATAGCGATGAAAACGTGCGGTACCGGAAGCTGCAGCCTAG  
GCCTAGTACGAAAGTACTACCGTAAACCTCTCAGCGCGCAGATCAGAGTGACCGTC

GCGGAAAAATTCTATTTTCGATGCTAAACCAGTTGATCGCTGCACAGAGGCTCTGATC  
AGTAGTTACTCTGAACGGCTGCTACTGCTGGATTAAGGCCAACCATGAAAGGCAGCT  
TTGGGGCCAACCTGGTTGAATTATGCACTATTACTCACTTTTTACGGTGTGACCATGGC  
GCCACGAACCGAAGAACTTGCTGCACTATATGAGTTACTTGAAGAGATGACTCTTGC  
CGAGGACAAAAACATTTCTCCTTGTCTCATCTGAATGGCTGAAGAAAATCGAAGACT  
GGCTGATGATCAGTTTCTTGATCACGATTCTGGTATTTCTATGTTTTGCAGCGTGGTA  
TCGCTA

>CONTIG\_199\_length\_2286\_cov\_5.115794

CGCTTTCGGCTTCGCGCAGAAAGCCGATGACCTGCTCGTCAGTAAAACGTTTCTTCA  
CGTCCAATCTCCTCGGGGTAGGGAATTGGACTCCAAACTGAGGCGCTACTCAAAATT  
GGGTGGACGTCGGATCTGCACGTTAGGTCGTGTCGCATTCCAAAGAGAACTACTGGC  
GGACGTGGCATGTCACCGAGTACTGCCAGCGGCTAGCGCGCAGGCCGGCAAGATTC  
GCGTAAAGCAACGATTGATGGTCTTTAAGATCGCCTTCGCCTCCGCGTAGGCCGGGAG  
TGAGGAGGTCGCTGTGCAGGTCGGATGGCCCGACATGGTTTATCAGGAAAATCCCA  
TCCTTATCGTAGGATGACCGGAGCTCATGAGGCCAGTCGGTAGCCTCGGTACCGCAG  
CCAGAGCTATGCTGCTGTCGGAGTCGCTGATGAAGGTACTATTGTTCTTGCCGGGTT  
CTGTTGCGAACCACCTACTTTGACCGCATGTCCGCTGCTGGCCGAGACTGAACATTG  
GGCAGGGCAGGGGATTAGGGAGCGTTATCGGGGGTAGAGAGGGCGGCCCTGCCCA  
AAGCGGACGCCACAGTCCACTGCTCTCAATTTGGGGCAGGATATCGCCAAGCAGGC  
TCGGAGCCCAGCTCATCGCCTTCAATGAAGAGCCTAGGGTCTTCCAGTAAAGACTCT  
GGCATTCTGGACGCATAGTCGGCAGTCTCATCGACAGTCCACGCTTTGGTTTCGGCG  
GTATGCGTGACTAGGTAGTGCGTCGTGACGGATCCGACGTTGGAATCAAACCTGAA  
ACCAGTGATCTGTTCTTGATGCGACTCCTTCGCAAGTCGGCGGGCGTTTGCGTCTCTT  
TCCGCATCAACCACAATGTGTGCTGCACCGAGCGCACTTGCTTGAAGCTGTTGGTGC  
ATCTCCGCAAGCTTAGATCGAACGTACCGGGCTCGGGTCGTTACTGATTCTGCGCTT  
TCTGTATCCCAGCTGCAAAGTGCTACTGCTTCAAAATTATCCAAGTAACGCGGGTCG  
GATTCATTTGGCGCTCCTCGAGCTCCCATCAAAATTGCTGCGATGGGACTACCCTTT  
TAGTGAAGAGACGGAAGAGCTTTGGGCCGACCAATAGCGAGGAATCAGCAGTGTCC  
TCAAGAAGTGCTTGATGGTCGCCCCGATACGATCGTTCCGCGTGCAAATGGATCCTCC  
CAGGAATAGTTAATGGGGATTGCATCAAGAGCGCGCTCTACATGCTCAATGAGGTA  
GCCGTCACTAACGGTAGTCAGCGGCGCAAGAAATGTGACATCCAGGTGCACAAAGG  
CCCTTCTAACCGCTATTAGGTGCGCATGTCGGTGCGAATATGCGTCGAACTTTAGTAG  
ATTCCGAAAGTTCAAATTGCCCCGAGCGTAGGCGTTTGCACTCGACTTGAACGCTGC  
CTCGATCCGTGATCAGTTCAATATCTGGAGTCCGCCGGTCCGACTCAGGAGTGAATC  
TTAAGTGGTAGCCTTCGAGTAGATAACGAGCGGCCGTAGCAAGCTCAAGCAGACTA  
CCTTCAGGATGGTTATTTTCGAGGATTTAGGAACTCGCTTGACGCCCCTTCGATGCCTT  
CGACGTGCTGCAAGTGTGGTAGTGCACTTCCGATGAGCTTCAAAAACGGAATCGCCC  
GCGACGCGATACGGGCATCGAAGAATCGACGGTCACAGGTAAGTGCATGTGCCTGG  
AGAAGCAGGCCTGAAGGCAAGTCCCCCGGTGGCAAAGATCTATTGGGTCGGGCCA

AAGCATCGACCCCGTCGGTGGCAGACAAGCGTGGGAAAAGTGATCCTTGGCCGCTT  
CAATCCTTCGTACAAGATCAGGTCCCGCCACTTGGTGCATCCAAGCGAGCGTCAGCT  
CCACATCGGGATCGTGTTTCGAGACCTATTTGCATAGTAAGGAAGTGTGCCTACCTAT  
GGGCCGTAATCCAGACGAGCAGGGATCACCATTGCCCCGGGATGCGAGGGAGGCCT  
CTCTACCCTGAGTCGGAAGTGGTCGAGGTCAATTATTGGCGGCAAGGTGGAATGAG  
GGGCTGGAACGTCCGATCTCTGCCGGGAGTAGGAGGGTTCGTGTCGACTCCCCACAA  
TTCAATGCCAGCCAAAAGTAGAGGTCTGCGGTTGATGTTGATCACGGAAGTCGGCGG  
GCGTCAGCCCGCCAGGCTGTCGTGCGGTATCTGTTGGTTGTAGTCGGCCAGCCACT  
GTTTCGGTCTGTTACGGACCTCGCTCAGCGTGCGGAAGATGTGCATGTCCAGCACGC  
CGCGCCGGTAGCTGCCGT

>CONTIG\_200\_length\_2280\_cov\_7.028333

GCAGCAGGTCGGGGTAGTCCGACTTGGCGGCGAAGAATTGCTTCATGGCAGGCGTG  
TGTTCTTGAGGGGCCTTGCCAGGCTTGGAATATCTGAGGAAACAGTCACTTATGAA  
TTTGCTCTGTAACGAAACTGACGGTCAGAAGAGGGATGTGGCGGGGAGTAACGGTC  
TTTTTTGTTGCGACCGTGTTGCGACGATTCAAAGCGAGACCCAATTGGCATGTTGCG  
ACGAGTTCGCATGGTAAGAAAAGCGTGCGTTGATGTTGCGACTTTGGTTGCAGCCAA  
TGGCACTTACACGACAGCAATGGAGGATGCATGAGCAAGACGTCGGAGCTGCCGGA  
CCTGCCAAAGAGGCGCGGGTTCGCTCAAGTTTAAGCTGACCTACGCCCAAGTCCTGA  
GCCTGTCGGTGGATCGGATCCCCGTGACGGACAACGCGGGCAAGGTCAAGCTGGTG  
GAGCGGGCCCCTGAAGAGGCCGCGCAACCCTACCGTTTGGTGGACGGAAGTGACAA  
GGCTCCTTCCGGTTTTAGTTTTCGGGTGGGGAGCACCAAGACCACATACGAGGTGGT  
CAAGCGTGGGCCGACGGGCATCCGCCGTTTTTCCTTGGGCAACGTCACTGACATGGG  
GCTGGACGAAGCCTACGAGGTAGCCAAGGGGCACCTGTCGGTGCTCCGGCAGACCG  
GGACCAATCCGGTGCACCAGGAGCGTGCAAGAACTCCGCGCCAAGCGTCGGGAAAAA  
CGCTCGGAAGACATCACGCTTCGGCAGTGCATGGAGCTCTACATCGAGCGCATGGG  
AGAGCGGGCCAAAAAGAAGAAGGTGAAGCAGGTCAAGTGTGAGGCGGTCCGCAGC  
AGCTTGCCCCGTCTGGAGCGACCCGAGGTGGGCCTGGCCGATTTGAAGATTCGGGA  
CACGCGAACCAGGACGTGGTGCGGGGATACGACGCGTTGCGCAAGAGCGCCATGC  
TTCGCTCCAACCGTATCCCCACCGCCATGCGTCAGGCCTTGGCATCCCACGACGACT  
GGGCCCAGCTATCCACAGCTCAGCTTGGAGAAGTGGGCATCGCTGGGAAATACATT  
CAACGGGTAAGGGCCGCGGGACTTGCCGCTGCCGAGCACACCTTCACCGATGCCAA  
GCGCTCTGTGGACCTGTTCAACGAAGTGAACAAGAAGAGGCGCACGAGGCTCGGC  
GGGAGCCCAAGATAATCTACAACCCATTCCAGGCTATCTACAGCAAGGATTTGCTTC  
GCGGGGCTCAGGACCTTCGCAACCACTACAGTCGGGCTGAGGTGCGCAATCCGTTG  
GGGGATGACACGCTGCCCAAGGTGCTGAAGGTCATCCTGGCTCGCCGAGATGAGCA  
GGGCGGTTTGAACGCCGCCGGTGCCGATTACCTGCTGCTGACTCTGTTGTGGGGCAC  
CAGGCGCAGCGAGGCAGCCGCGTTGCGGTGGTTTCGACCGCTGCACGCCGGGCGAGC  
TGAGTCAGCGCGAGGTGTCGTGGGTGTCGTTGACGCCGCCGGGGCAGGTCAATCCTT  
TCACTCGTCGGGAGGGATCGCAGGTCTATCTGTTTCGACACCAAGAAGCGAGATGAG

CGCTATTTGCCAGTGACCTATTTTCGCCGAGCAGGTGCTTCAGCGGCGTCTGGATGAG  
CGTCCGGACGATACCGAGGCGAAGAAGGACGTAGCGACAACGGAAGGCTTGCTTCG  
AGCCGCCAAGGCCAAGGGCGCTAACCGGGAGTTGATCAAGGGATTGGAGGTGGAGT  
TGGAGAAAGCGCGCCACACTCTTGATCGAACCCTGCTATGTCTTCCCAGCACGTTCAA  
GCCGCAGCCGCTCGGGGCACTACTCAGACAGCAAGAGCATCGTGGCCAATGTCCGG  
CGCGATGCGGGCTTGTTGAACCTCAGCGAGGATATCGACATCGGGCTGACCCCCCA  
CGATCTTCGTCGAACGATGGGTGCTTACGCAGCCCTCCTGTTTGGAGAGAGCCGCAT  
CGTCTCCCAACTGCTGCATCACCACACGCGGGGACAGGGGCGAGGATCGGATGGCGG  
CGGTGTCGGAGCGCTACACCGAGCAGGAGTGGTCCAAGTTGCGAGAAGCGATGGGG  
CGAGTTGAGGAAGCCATGGTCGCCAAGAGTCCGCGGGTGTGGAACCGGCTGAAGGG  
GACGGACAAGCCGCGGCTGGACGAGGCCAATGACCCTCCGGTTACTATCTTTGCTCA  
ACGGAACCAGCGGACCGCACTGGATGATTGAGGTTGTTTCGAGTGAAGAGGACTAC  
CGCGCGCTGTTGGAGGCCGCGCTGGACC

>CONTIG\_201\_length\_2259\_cov\_7.655253

ACCCTCAAGAGGCCTACGCGGCTCGGCAGCGCGACCAAGGGTTTACCGCGGCCCAG  
TGGTGGGTCATGACGCCGCTGACTGTGATGGGGGCTTTTTGGGTCACCTCGATGCTC  
AGCGGGCTGCCCATGGTGCTGCTCGTGTTGTGGCTTCAGCTGACCCGATAGACCCAA  
ACGTTAATTGGGGATGGGAGGGATGTCCAAGGCACCCGGCTAGGGCGCTGCAGCAA  
GCTGTCGTTAAATCACGGTACGCCCAAGGTGAAGCAAGCGCCCTGCCCGGCTTTGA  
CTCCACATAGACAAAGCCGCTGGCGCGGCGAACGGTGCCATAGACCTGAGAAAGGC  
CCAGACCCGTCTCTTTCCAAGGCGGCTTGGTGGTGAAGTGGCCTCGAACAGCCGCC  
CAACCACCTCTGGCGCAATGCCTTACCGAGGATGGCAAGCCCGGACGTCTATAGCTC  
TCGATCGGACGACTCGGTCTTTTTATTGGCAATCTACGCCGGCGCACGTATCCGTTG  
AGCGAGGAGCATCGATTGTTCTACGTGGCGCTAACTCTCGCTAGGCAAACCGTGGTG  
ATGTTACCGTTCTTAGGGAGCAAGCCCGCTTCCTGGAAGATTTGGTCAAAAAAGGA  
AGCTTCGAAGTGACGAGGTTGGCTTGGAAGGCCGCTAAAGAGGATCGGTGTGCCGC  
ACGCAAGGCTGGGATGTTGGCAGACCGAACCAGCCTCACGGCTTATTTAGATTCTGC  
TCCAGCTTTCCTCATCACCAAAGAAAATCATCAAGCAATATCCTGTCAATTCAGCGA  
AGGCCGCTAAACCTAAAAAATTCCAACACATTTGCGTAAAGCAAATACATAAATAA  
AATTACTTACCAAGCTTATCAGTTACACTCCTGCACAAATCAATGATCGCTTTAGCC  
AATTCAATTCGCGAGCCTTCAAATCACTACCACCATCGTCACCACTTTTTTCGGTAT  
CACTAATCATTTTCACCAAAGCCATAGCTAATGACAGAGGAACTGCCGCAGCGAGC  
ACTAGAGCCCCGCTAAGAAAATAAAATATGCCACTGCCAACTTTTATCAGCCGCA  
CCGATAATAAAAAGCAGATAATTATCAGATATTATTTGCCAAAAGATCGCAATCAA  
CATCCCAAAGAAGACAGTCGAAATAAACTAATCCCCCAGAAAGCAAACCATCGCT  
TCCTTCTGTGGGCTTCGATGTTCTTTCTATGCTCATCCCTTAAGGGGTTCTTGTCGAG  
TGTGGGATCAAAAATCCGGGCTGACCCGGCTGAGAGCCCTTAAGTCCATCTGCCGT  
GGATTGGAGGGTCGAAGAAATTTCTAGTTGAGCGCCTTTCAACGTCTCGATTACTTG  
ATCAACAAGCGCGGTGAATTGGACAGGATCCAAAGTGACCGAGCTCGAAGGCGGAG

AAATCACATCTCCAGCAGCTTTATTCTGTGCACTGGCTTGACCGTTAGCAGCGCCAT  
GCAAAGCAGCTTCCGGTTTAACCGAGGACTGGACGCCTTGTTGTTTGGGGTGCGCTT  
GCGTGGGCTTCTTGGGATTGTGTGCGGAACCTGAGTTTTGACTCATAAAAATCTCTG  
ATCAAGTTGTCATCAATGACAGCAGAAAACCTGGTTCCGTCCACCTCGATCATTCCAA  
GTAATCCACCAAGGCGAGCCAGGCATGTGAGTCATGTTTCGAAAGCTGATAACCATC  
ATAGCTTCCATAACTACTCCAAACGCTTTGGAGGAGTTGGTCAGCTTGAGCGTCTAC  
CTGCGATGCTCGGTCCCATGGATTTCGGGCCAGTCTGTAATAGACCACTGACTGGACT  
GCCATCGTAATCTCGAACCTGATTATAAAGCGAACGAACACTACTGGCCCATATTTCCA  
AGCCTCCACCGGCTCGTTGATAAGTGGACCGCGACCATAGCCGAGACTGAAAGCAT  
GAGCTATGTAGACAAGCTTGAGCAACTGCATGGGCGTCAAACCACGCCTCTCGCGC  
GCGGCACGCTCAAGAAGGTTGTTAGCAATGTTGGTGGAGGGATAGGTCCTAGCTCTC  
ATGCTTTCGAGTCTACCACATTTACCCGAATCCGTAAGACATCCGAGCCAACAAGTC  
AAGGCCCTCTGCGGGAGTTAGTCCATATCTGTAGGTAAAACCCTTACATGGGAACAA  
ATAAGAAAAAGCCCATCAGGCTATGGCCGCTTGCCCGCAAGACCCGCTACAATGGC  
AGACCACAAAGCAGGACACCCTCCTGGTTTGCGTGGCTGTAGGAGAG

>CONTIG\_202\_length\_2252\_cov\_4.154824

ATAGAGGACATTGCTTGCTTCCATTGGAACAATGGAAGTAGTGATAAAACAGCTCA  
GGAATTCGTCAATCAGAATGCGTGATTTTTTTCTTTGCTTGAAGCAAACCTCTGCCGCA  
ACGGCTCCGCTTGAACCTTGCGCCAAAATTATTCTGTCCGGTTCCAACCAGGTGGATC  
CATTTAATTCAATGATTTAGGTCTGACTGGCGAAATATTTTTGAGTGATTTGCCCTGG  
CATTATTGTACTGTTTAATGCAAATAAGCTAACTAAAACAGCTCTTATGTTAGCTTTT  
AAGGTGTACCGTTCCTAAATAATCAATCAGATGTTAGCATTATCTCGGTAAATAAGG  
CAGCCAAAAACGGGAGTTAACTAACATGGACCCCTTTGAGGGCGTGCTGGTGGACT  
ACCTGCGTGCGGATCGCGCGCTGTTTCGTGAGCAGCCAGTGCTGTATCGGGCTTCCAT  
GGGGTGGCCAATCCGAGCACCGAGTCCGCACTGATGTTGCTGGGTGACGGCATGCC  
GTGCCGGGAGCTGGCTTTGAAATTTTTGCTAAAGGTCTCGGTCCCAAGGGCGACTCA  
TGGTCATCATATACGTGCCCCCTGGCTGCCAATGGCAGCGTGTGAGCAACGCCGTAA  
TTGATGATTTTATTCTGTCTAACTTGGTGAGAGGCGCCAATGTCTAATGAAGGAAAA  
TTTCTGAATCACATCTTTCGCGTCGCTTTAGTCTTGGCGAGTTGTATAACGCCACCTA  
TCGCTCGGGCAGCTTCGTCTGATGGCATTCCAGCCGGTGATTGGCGCGGAATCCTGC  
GCACGAGCGAAGCCACAGGCCCGGTCTATGTCCGCTTGAGTGAGCGCGCTACAGGT  
GCTGGTGGCCCGCAGTCCGCGGACTTGCGGTTTGGGCCTCCCTTCAACTGCTCTCTG  
GAGTTGCGGGCGCAGAACGATGGTTACGCAATGCTGTCGCGCAATGGTGGCAAGTT  
CTGCGACGTGCAGACCGGTAAACAGGCTCAGCTTCGGGTGATGGATGAGACAGCAG  
AGAGCATAGAGCTCACACTGCTGGGACATGAGCAGCCTCTGGTCGTCACCCTAGAC  
CAGAAAAGGGCAGAGTTGGCCGAAGCCGGTCGCTGGCGAGGTGCGGGCCTCATGGC  
CTCACAGTTAGAGATTGTTGCGACCAGCGTCCGGCCTGGGGATGTGCTTGGTCGCT  
GCGCTATGGCGCTCCAGGGATTGTCAAGTCGAGTTGCGATACGCCGGCCGCGTCG  
ATGGTGCGTTGACTGCATGGATCGGCGCTAATGACCGTGGATATTGCCGTCAGCTCA

GCGACGGCCAAGCCGCCATGCAGGTTTCGTCCGGATGGCAGCGCGACGTTTTTCGATG  
TTCGTCAAGGGTCAACGCGACACGGTGTTTTTTTGAACGTGTGCCTTGATGCGCGCTA  
GGTATAGCTACGCACACTATCGCGCCAGCAATCACGTTCTTGGAGGATGTCGTGCCC  
TGGCGCTATCACTCCTGGAATCAAGGTGCCTACGAAGACCCAGCCGCTCGGCCTCGG  
CCAAGCCGGGTTTCAATTGCGTAGGTGACAAGTGTGCGCGGGCTCAGAACTTCCTGA  
CAGCCTAAGCGGTGTCAGGCCTATAGGCCACGGAACGCCTGCAGCGCAACCTGACT  
TTGCCGGACGCGGGACCGATGGTCGCTCACCCCGCGTGACGCTTGAGCAGCGTCAC  
GCCGGCACCCGGAAGTATTCCGCGCTGCCTTGGTGGATGCGTCTCAAGCAGTGCGA  
CAAGGCTGCTGATACTCAAGCCCATGGACAGAGCCGAGCTTCGCCGTCACCTCGAA  
CGCCTGGATGCAGCCGTTCCGACATTGCGGGCGTCGAGTCCTGATCGCCGCCACTTT  
TGGCGAGCTTTTACAGTCATGGCCGCCGCCATCGAGAGCAAGGCAGCGACGAGCGA  
AGACGCACAGTTCGTGCGCCGTCGGGCGGAGGAAATCTTGTCTTGGCACGGACTGG  
AAAACACCGAAAACCAAGTCTGAGTTCATGAGTGTTGCCAAGGCCATCCCGATGGT  
TGCGTGCTTCTCGTGCGCAGTGATGCGTGCGTAAGGCAAGCAAAGCTAGGTAGTGG  
CTTACCAATGGCTGCAAAACCCAGCCATAGCCTGCTGACAACGTCAGTCGCTTCGT  
CAATCCGCACGCCGTTTGGCCCGTAAGCCTTGTTGGCATGCATGGTGTTCCTCCACA  
ATGCGCTGGGCCTCTTGAAGGGAATCTTGGCTTCGCTGTCC

>CONTIG\_203\_length\_2221\_cov\_64.445081

TGCAGGCATAGCTTTTGGCTCCGTTGGGTGGTTGGTAAAGCCCTCGGAGTTTATCGA  
TATTGCACACGTTAGATCGCGATCACGGGCCATAGGGCGGCAGCGCCAAGTCTTTGT  
TGACCATCACCGCGACCCTTTGGCCCGGCCTGATTTCCAGTGTCGGCTGGATGTTGA  
TGCTGCGCTGAAGCAGCTGTGCGCCGGCCTGGTTGATTGACTGTGCCGCGCCTTGGG  
ACGCGGCTTGACCGGCGTCACGCTGGAAAGAGGAGAAGCTATCGCCCTCGGCGGTG  
GCAACGGCTGCAGCAACCGTGCTGGACAGCAAGACGCTAGACAGCACCTTGCCCCA  
GTGATTGTTACCTTGTGCTCACGCCAGCGTAGCCGGATAGGTCAACGCCGGGCAT  
GCCTTCCAGGTCGAGACTGGACCCGTTTCGGAAAGCGCAACCGCTGCCACACCAGCA  
ATACGCGGTTCTGTCCGAAGGTGACGCGCGAATCGTATGCGCCGATCAGCACTGAA  
CCTTGCGGGATGATCACGTACCGGCCGGTCGGGGTGTGCTAGACCGGCTGTGACAC  
CTGGGCGGTGATCAGGCCGGGTAGATCGCTATTGATGCCGGTCAGGAACAGGGCAG  
GGATCAGCACGCCGGCACTGACGACGGTCGGCGTTGCTGGCGGTGTCAGACGCGAT  
TGCAACGTGCCTGTATCGCGCTTTTCGTCCATGAACTGGCGCTTGTCGTCTGTGCGT  
TTGCGTCATCGCGACCGGTCTTGTCGCCGCCGTTGGCGCCTGCAGCTGCCGCCGCTG  
CTTGGGCAAGCATCTGCTGCTGCAGAGCATCGGGCGCTTCGGGCGGCATCCCACCG  
AACGCCTGCGGCCTCATGTTGCCGGCCTGACTTGGTGCACCTCCCTGCTGGAAGCTG  
GTTTTCGCGTAGCGGGCGTTGGCAGCCTGCTGCAGGCGCTGTAGATCCTGCTGCGCG  
GCGAACTGCTGCGCGGCTGTCTGGGGCGGTGCACGACCGCCGCCGTAGGCGCGCGT  
TTCGGCTTGCTGCTGGGCCTCGTATTGCATTTGCCCCGACCTCGCCCGGCATCGGTGG  
CCCCAGCTTCGGGGCACGCTCTGCACGTTGCTGTGCGGCCGTGGCGTAATCGCCCGG  
CAGCGCATTGAACGCCTCGGGCTTGGTCGCCATGTTCGTGGTCGGCGGCTGATCCTT

AGCTTTGTTCTGGTTGGGCTTTTGCGTGAAAGCCTGGACGAACGCCAATGCGATCAG  
GATGCCCCGCGATGCCGGCGATGATGCCGACCTTCTTCTTGTCCAAACTCTTGATCTTC  
GGCTTCGGCGTGCCCAAGGGAATGGGCGCGTCCTGGGGCGGCGTGTAGCCCCGCGA  
GGCTGACTCGCCAGTAACAGGATCGCGTTCGTCGTCAGCCGGGGTTCCGTTCTGTTGGT  
CTGCATGCGGCACCTGTTTGATTAGCGACGGCGGATCGTGATGGCCTGCTTAGCACC  
GACGCGCAGCTCTGCGCGATCGAACACGCGATCCACGATGTAGGTCGGGCGGTTAG  
TGCCGTTTCGCCACACCCTTGACGCGGTAGTTGACCAGCAGCGGTTTCGCCCTTCTCGA  
TCAGGAACAGGGCCGGGGCGTCGGTCGCATTGAGCGTGGCCGGCATGCGGATATAG  
GTCTGCGCACCGTCGTCAAAGACCTGCATGGGCTTCCAGGAATAGCGGCCGCCCTTG  
ATGTCGTAATTGAAGTGAAGCGCATCCGGGGCCACGGCCACCGGCTCGACCGCTTC  
GCGCTTGGCCGCGACGGCTTGCTTCGCTTTCCAGGTGTCCATCGGGTACTGCCATGA  
CACACTCGGCATGCTCCAATCGGCCACGCTGCGCGCAGTGACCAGGTAGGTGCGAC  
GATTGGTGGCAATGAACAGGTCGTTGGTCAGACCTGGCTCCACGGCTTTGAGTACCA  
GGTGCACTTGCTCGCCGGCATCGGTGCCGCTGGTGACCTGGCTAATCAGCCACCGCA  
CAGTGTCCGAGCCATTGACCTCGCCCGTCAGCTGTTTCGCCGGGCTGGAAGTCGATCA  
CGGTCTGACGGCCTGCGCCGACATAGATCGTGTAAGCGCACCAAGGCCGGTAGGTG  
AAGATTGTTTGACCGCCGACGTTTCGCCGTGCTGCTGCTCGTTGGCACCTGGCGCGCC  
TGGCCGACGTACTCGGCCACTTGGGCGCGCTGCTTGCTGTCTGAAGTCCGACCGCGCT  
TTGGCGACACG

>CONTIG\_204\_length\_2201\_cov\_6.890550

GCCGACGAACGTGTGCGTCTTCGCTCGTCGCTGCCTTGCTCTCGATGGCGGGCGGCCAT  
GACTGTAAAAGATCGCCAGAAGTGGCGGCGATCAGGACTCGACGCCCCGAGGGCGG  
GCACCGCAGCATCCAGACGCTCAAGGTGATGGCGAAGCTCAGCTCTGTCCATGGGC  
CTGAGTATCGGCGGTGTCGTCGCACCACTTGAGACTTAGCATCGTCAGGACAGCGAG  
AGCGAACTTCTTGCAGGGTGCCGGCACAACGCTGCTCAAGCATTCCATCGGGCATAT  
TCTCAAAGCCTGGCAACATCCACCGAACCCGGACGTGTAGGCCAGCGAAACGCTTT  
TAACCTCGCCAGCGCTACCAAGTTCCTCTCACCCTTTGAAGAACGAGAATCACCTGA  
TGGCAAAGAAAAACGCCCCAGGAGTGAACCTGGGGCGTTTCGTGGAAAAGCTGGACCT  
GATCTCAGCTCGGCAGGGTTTCGATGGGACCTACGTCACCGGTCGGAATTCTGCCAC  
CGCACGAGCCGTAGCAGCCACCGCCGATCAGCACCCCGCCGCCACCGCCGCCCGTT  
CCAGCCGAGCCGCCGCCGCCGGAACCACTTGAAGGCTGCTGAGCAATCTTCTC  
GGCCATTTCCCTTGCCTTCTTTCCGCAAGGCTTCTCAATATAGACCATGCCACGGCCA  
GTGTAGCCGAGAATCTTTACGGTGTAAGACACATACCCCTTATAGGAGTTTGTGACC  
CAATTTCCCTCACCCAGCAGTTTGGATGCTGCCGAATCAAGCCTATCCATAAAAACG  
GCATTGGCAGGATTCTTGCTGTCGCTAAACTTTGGCAGCTGCGTCAAGGGCACCTGA  
ATTGGCACCAAGTGGCGGCATCGGGAGTTCCGAGCACGCAAATGCAGCCCCCATAAG  
CCCCGTCAGAGACATCGCAGCGACGCCAGCTTTCTTCATAATTCCCATTACGCCCC  
ACTCCTTTTTTAAAGAACAAATTAACCACACAAACCTACTGACCGATTGGACGTTTATC  
CAATACCGGTGCCCTGCCATGCTTCGACGTATAGATCCGGTCTATTTCAGCGTTGAG

TCGCAGGGCTTCAGACTCCCCGAGCATTCTTTGCTCTGTTGAAAGTGACTTAGACAT  
CATCACTTCTCGAGTAACAGACGCACGGGTATCTCCACGCATTTCCGCCACACGCGA  
CACGGCATAACGCAGCAACAGGATCCCCGCTTGCGCTGCCGCCTTGGAAGGACGCCA  
GCATATTCAAAGCGAAAAGGTTTCCTTCCGCACCAGCGTCTACCAGACGCTGTTGCG  
CCATAGGATCAGAAGCGAGTAATCGCGCATCTAAGATCGTCTGCGCGACCTTATCCC  
CTGCCTCTGAGGCCTGCTTCAGCAGGGCCTCTGGCGCGCCCATGTAGGCGTCGAGCT  
GCTTTTCATTGGGAAAGCCATGACGATCTAGCCACTTCTGCTCGGCCTTGCTTTCGGC  
ATAGCCCGGGTCGTTATCGAAGCTCATCCCGTCTCTAGTTTTCGGCACTTCTGGGAA  
CGGATGTGGAACACGAGAGTCATTCCGAAGATCGACGCCGCCCTCAACCGAGTGAG  
ACGGGGCCCCGATCCTTGACTGATTCGTTGCTGCGATTGGGAGTCTCATTCTGGGAGA  
TGCCCTGCGTTGACCCCTTCGTCCTTACGCGCTTCGTGCGTCCAGATGATGCCACCTAC  
TACGACTGCCAGTGCTGCTGCACTTAGCGTCACTGCTTTGTTGCCCATCTCACCTTCT  
CGTAATTCCATTACAGCTGCGTATGCGCAGTCCCAAGGAGGATAGCGTTGCAGATCA  
GCTCACTTCACGCAAGCTTAATCTTGCAAAAACTTAGTTCCGTATCGGAGCAAAGG  
CCTGTGCAAGCAGCGAACGATGAAGATGTGAGTGCGAATCGGATCTTCTTGCTTATT  
CAGCGCCATGACACCGAATGAGACCAAGCCTCGCCATGATGTAACGGGTGAACTTC  
TTACAGGGTGCCGGCGTGACGCTGCTCAATCGTCCGCGAGTAGAGCGACCATCGGT  
CTCGCGTCCGGCAATGTCATATTTGGCTTAGGTTGTTTCGTAAGCCATAGGTCTCAAT  
CGCCTCGCGATGTAGGGAATTTCTGAATCGCCTCCACCGCCGTAGCCATCGATTAGC  
TTAATTAAACTAACAATAATTACCTAACATTTATCATATAT

>CONTIG\_205\_length\_2191\_cov\_9.753391

CGCATGCACCGTGCGCCACTTGGGAAACGTCTCGGGCAACATCCGCCACTGGCAAC  
CACTCTTGAGCAGATAGAGCACCGCGCAAAACACCTCGTACAAATCGACCTTGCGT  
GGCGCGGTCTTCTTGCGTGACCTTCAAGCAAAGCGCGGATCTGCTCAAAGTCTGCTCA  
CGGCTGATGTCACTGGGATAGCGTGCTCTCATCTCCATATGATCGGATATTTCCGGGC  
AGACTTTGAACAGGTTCTTAGGCCAATCCTTGCCGATCTCGCTCAGGTAGCGGCTAA  
ATGCCTTGGTGATCCAGTTCCCCTGCCCGTTTATTGGGTCTGCCCTCGCTTGGGGGAA  
CAGTCGCTTGTGTCCAGCCGCCTTACAGGTATCGACCCACTCCATAAAACCTAGGGC  
CAAAAGATCCGGATGCAGCGGCACCGTGCGTAGGCTGACTTCGGTCTTGACCTTCTG  
ATGCTCTCCCTCGTCCGAAATCCGGATGCATGGGATGTTGCCTTCCTTAAAGACATC  
CGCCACCAGCAGCTGCCCCGACCTCAGAAGCGCGCGCTCCGGTGTAAGGCCGATGA  
GCGCGGCCCAACGGGCGTTTGGGGAAAGCCTTGGGAAGTTGACCGGCGAGAAGATC  
GCCTGGATCTGCTCACGGTCGTAGGCCTTGAAGCCGAGCTTGCGACGAGCGCGCTTC  
TCCCGTTGTGGATAGCTCACATGGCCTGATGCCGGGTTGTGCGCTTTGGGGTAGTAG  
CCTGAGGCAATAGCCCAATCGAAAAAGCCGCCCTTCCCGCCCACATAGCTTTGCTTG  
TTCATCAGGGTCGGGGTAGAAGCGCCCTTGTGCGCAAGTGCTGATACCAATGCGCC  
AGATCTGTCCGCGTGAGGCTGTGAAGCTTGGTCTTGGTGCCAAGAAAGGCCACCAA  
AGACTCGATAGCAGTCTTTTTGATCGTGTAGGTCTTTGGGAGCGTGCGGCTTTGGAT  
CGACGCGAGCCAACCGTCCCGTGCTTGTCCAAGGCAATTGCCTGGGCGACCTGGC

GCCGGCCGGGCGGAGATTGAACGTGCTCTCCAAGGTCCAGCGCGCCGATGGCGGGCG  
ACCTCAGCGGCATTGGCCCAGGTCTGGTTCTTGCGAAATAGACGCAGATCTTCGTCTG  
TTGTCGATCTGCCACCTTTTCGCTGATCGTGCCGTCCGGCGCTTGTGTTTCGATGCAAGG  
TCAAATCGCGAAGCGATGCGCCTTGGCTCAGGCGTGCGACCAACGCATCCATGTCCT  
TCTTGCCAAGTCTATCCACACGTCGATCCCTCAACAGGTCTGAAGGCCTGAGCATAAC  
CTGAGGCAAGCATCAGCGCCCCGAGTCGCGCGCTCGGCAGTTCTTTTCGTGTGGAGG  
GTGTGTTTGATGACCTTGCCTCCCAAGACCGTTTGCAGATCGATGGGAACGCGTTGG  
CGGAAGGACCAGTAGCCAGAGGAGGATCTGACGAGGTGATGAGGAATGCGCATCG  
GGAGATGTGTCCCGATTTGTGTCTTGGCCAGACCTAAAAATCTCCGATATAATCCT  
TTAAAAATCAAGGAATTAACAGGAAAACTGGCGGAGAGAGTGGGATTCGAACCCAC  
GGAAGGTTTGACCTTTCGCCGGTTTTCAAGACCGGTGCCTTCAACCGCTCGGCCATC  
TCTCCGATGCTGCTTTGATTCTGCTCTGCGTGGTCACCGATGGCATCGGTGTATCACA  
CAGGCGCCACGCGCTTTGCGGGTGACGCTGATGGTGACCACCACTTGTGCGGTGTCA  
ACCACCCCGGGATCGCTCCCGGGCGCGCATTCTCGCATGCCCCGGGCGCGCTTTGCT  
TGTTTACACCGCACTGCTTTTGGCTGGCGCAGCCTGCTGCACCGTCACTCGCGGCAG  
GCCACTGCATGTTACCGGCCGGCCGCGAGCACCCGAACAAGGATGCAACCTGCCGA  
ACGTTGAAGCGAGCTGACTACCGAGAACGAGCAACTGCCGAATGGCTTGTGAGCCG  
GCCTCGGCGACCAGGCACAGCCTCAGCCGGCTTCAGCCACAGCCAGCCGCGGTGCA  
GTGCCGGCCGCACGCTTGAGCTTTTCCGCCAGTTCGGCACAGTTGCCGCCGCAATCC  
AGACGCGAGCGTTTCGATCTCGCGCGGCAGGTGTTTCGGCCAGGAAGTCGATGAACAC  
GCGCACCGCCGGCAGCAGGCCGCGGCGCGAGGCCGAAC

>CONTIG\_206\_length\_2189\_cov\_278.254122

TGCGCTCAGGCAAGACGATCTGTGCCGGCATTTCGCTCTGCGTTGCGGTTGCCGGCG  
ACGGCGCTCGCACCGCCTCTTGCTGCTCTGCCTGCAATGGAACAGCAGATGGCGCAT  
CGTTCTGTGGCATGACTACTCGGGCTTGCTGCTCACCGCCCTGCTCCACCGCCGCATT  
CGCCGATGCCGGCGCTGCGGGTTTTCAAGGCATCTCGGCGCGCGCTTTGTGCCTGGGA  
CAATGCAGCATCCAGATCTTGGCCGGCAACGCCCCGTTGCCGGCAACCCTTGGTTTTG  
CTGGAAGTGCCTTACGGCATGTTTCGGTCTCCGGACCATAGTGCCCGTCTTGCGGCAC  
GGCATGACCGTTTGGACCACGCGCATCCACTTGCTGCAAGCGATACTGCAAGAACTC  
GACCTCTTGCCCTCGGTTCGCCAGGCGCAGCCCTTCCACTTCCCTGAAATGACGGCGG  
CGTTGGAACAGTTGCCTGGGTGAGCTTCCTCACGAGACGTGAGAGCTGATGAAG  
GCGATCCGACGCTCGGCGCAGATGCGCTTGCCGAGGGTGGGTCTACTGCCTCTGCCT  
TCGGCTGGACTGCGCCGGCTGTGCGGGGTGCGGCAACCTCAGGTGTTTCGGGTTTCTT  
GTGGTTCGCGTTGCGGGACAGGTTTCGGGCTTCGATTTCGGCAGGCTTGGCGACCGGGC  
GCGGCTCTTCTCGCACTTGCGTATTGACGGGTGCAGGCATCACGACCGGGGCGGGCG  
TCGCCGTCTCCGCAATGGCAGGCTGCTCAGCGGCGCGTGCTACGCCCTGATCACGCT  
GCGCATCAATGGCTGCCTGAGGCGCTCGGGTTTCGTCCACATGCGGGGCGGTAACA  
GCTGTGCGCGCAAAGCTTGCGACCTGTTGCGCTTCTTGCGTGGACACACCTTGCCGG  
TTGGCCTCCCGCAACGCTTGCTCGTAAGCATCGCGTTCTTGTGGCGATTGCGCATCA

ATGCGCAGGTCTGGTGCACCGGCCGAAGGCGGCTGCTCCTGCCGAAGTGACTGCAC  
CTCGCCGAGTGCCTGATGGATGTCGGCGGTGCTGGTGGTTGCCGCAACGCGCACAG  
CACCATCGGCGTCACGGCTCAGATGCTGGATGGGGCTGTCCACCGAATATTGGCCG  
GTCGCATCACGCTCCAACGCCAAAGAGCTGGTTCGCGGCATCAATCCCGTTTGCCTCA  
CGGGTTTTTTGCACCGCAAGCTGGATCGCGCCTGCAGTCTGGGCATTGGGCGCAACG  
CCATAGGCGGCATACGTTCGCTCGGTATTGACCTGATCCTGCTGCTGTGGCGTTGGC  
GTTTGCCTTGCCGGCATCTGTGCCAATGCCTGCGCGTGCTGTTCTAAGGCTGGCTGC  
AAGCGTTCACGCGTTGCATTGAGTTCCAGTGGGACATTGCCTTCGGCAGCAACGCCG  
TCATGCCGCCACTGGCCCTGCGTATCGCGCTGATACTGCTTGCCGTCCGAGGCTTGC  
AACGAGTCCGGGTTCAAGGCTGTTTGCACGGCCGCTGGCACGGGGCCGAAATCGTC  
CCAGCCATTGCGCTGATGGGCAGCCTGATAAGTCGCTGCAATCGCAGCCGGACCTC  
GGGCGATGTTTCGCGTCAACCACCTGGGCTGCTTGTGGTCCAACGCGGCACTGCGCT  
CAGGACTTGCCGGATCAACCGTCCAGACAGGTTCGATCGTTCCGATCGACGTCGTCGG  
CGACCATCCGTGACCACTGGCCACTCGCCGGATCGTGTGCGCAATCACGTGCGTAGA  
GATGCGCAGCATCTGCCTCGCTGGACGGCTGCACATAGGGGTTACTGGGTTGCACCT  
TGCCCAGCGCCTGCTCGGTTCGCTACTGGCGTGATAGTTCAGCTCGCGCGCTT  
TTTCGGGCAGTGCGAACATGGCCTGCTTCTGCGGCGCATCGACGCCATCGTTTGGCA  
GATCGGCTTTCTCTTGGCGAAGCCACTGGCTGCCGTTGAACTCCCAGCTCACGCCCT  
GCTTGTGCGTCTGTGTATAGATCTGGCGGTTGTCCCAGAGCGTCACGGCCTTGTGCG  
CAGCAGCACTGAACAGATAACCATCGGCCACCACCAGCGCGACGGGGCCCGGCGCCG  
GTTGTGCCAACAAACGGCAGCGGCGGCGGCACCTCCCGCCCAGCCGCCACGCCTCG  
GGCACCAAAGTGCAGCGCTTCTGAGCGCGCA

>CONTIG\_207\_length\_2178\_cov\_84.471965

GAACCATGACGCCCAGACGTCCTTCCATCCCGATACAGGTGCGGGCATTCCGCCACA  
GGCGCTGGCGGCCTTGCTGGCTCTGGGGTTTGGCCGCCGCGCTGGTTCGCGCTATTGC  
TGATTTGGCTTTTCGTCCAGGTGGTCCGGCGATTCCACGACGCAGTCTCCCGTGCGG  
TCAACACCGCACAGGTGGCTGGGCCTCCCTGGCAGTTGGGCAACCCCGAGGGCCGT  
TTCACCATGACGCTCTATGGGGACCTCGAATGCCCATTTCTGCCGCTCCTACTTCCCG  
TGCTCAAGCGCTGGGTGGGCGTCAACGCGGACGTGGCCCTGCAATGGCAGCACATG  
CCGCTGGCCGCGCATGAGCCGGCTGCGTCAGCCGAAGCACGTTTAGCCGAATGCGC  
CGCTGAGGTGGGTGGGCATGCTGCCTTTTGGCAGACCATCGAATGGGTCTATGCCCCA  
TACGCGCAGCGACGGCCAGGGCTTGCCCGTTGGCCTGCGCTATCCCGACCTCACGCC  
CGCTATCGATCAGTGCCTGGCGAGCGAGCGGCCGGACTTGGCGATCCGTACCCAGG  
CCGCGGAAGCGACGAAGAGCGGCGTGACCGCCACGCCATCGGTCAGACTGCACGAT  
CGCCAGACCGGTCAGACCATCCTGCTGCAGGGGGCCGATCGAGGGCGACGCCCTGCT  
GTCGGCCATGGACATTTTGTGCGGCTGACGACCCGGCCGACACACCCACCACCGAAA  
TGCCTGCCGACGTTGTGCGGCGACATGCCCAGGTAGCCTGCGGTCTTGAGGCTACGG  
CGCAGCCCGCTGCGCTGACCGCTACCCGTTTCGCTCGCATCCTGGCCGCGAACGATC  
ACCGCAGCCGCGGTGGTGGATGCATCCTGTTCCGTTATTCCTATCCCCCGGAGGGCT

TGCCCTTCAGGGGCGTGCGCCCTCCTATCTCACATCTGGAGGTTTCGTCATGCCTTTTCG  
CCGTTAATAACTCCTGCGTGGAGTCACTTCCTTTTCGTCGCTGCGCAGCACGAGGACC  
GGATCATCCAGCAAGCCATCGCGCTGCTGGAACAGCGTGTTTTCAAAGCCGGCCCG  
CGTCTCGACTGGCCAGCAGACGTTTCGGGACTACCTGCGTCTGAAGCTGGTCGACGA  
GCCCCAACGAAGTATTCGTCGTTGTGTTTCATGGACAATCTGCACCAAGTGCTGGCCTG  
TGAACCGATGTTTCAGAGGCACGATCAATTCGGCCACGGTTCACGCGCGTGTCATCGT  
GCAGCGTGCAATTGGCGCTGAACGCTGCCGCCGTCAATTCTTTCGCACCAGCATCCCTC  
GGGGGCCACTGAACCGTCGAACGCTGATCGCACGCTAACCCACCAACTGGAAGCTG  
CGCTGGCGCTCATCGATGTTTCGGGTACTGGACCACATCATCATCGGCAAGGGAACCTC  
CATTTTCCTTCGCTGAGCGCGGCCTGCTGTAGCCCATCTTTTTTCATTGATCATTGCGG  
GGGCTTCGGCCCCCGTTTTTTCTTTGCAGCGAGATAATCTGGTATGTGGGGTGCCCG  
CGATGCGCTTTGTTTGTGCGTGTCGCATCGGGTTCGGCGTTTGACTATCGCCCTGATC  
AACTTCCGGGGCACGCGACATGCCAGCATCTTTTCTCAGGTTCGCGCCAGGCTTGCG  
AGCCCTTGGATTAGCCGTCGTGCTGCCTGCGTCCTTGGTGGCATTACAGCCCGGCCAC  
ACTGGCTACCGATGTGCTGGTCATCACCGACAGCCGTCATCCGGTCAGGACCATGGG  
CGGCGAGCGGCTGATCGAGCTGGACGAAGCGCCGCGGATCGAAGCTGAGCTTTCTG  
CGGCACTGCCCCGCCGATCCCGATCAGGCAACAGCCATCGCCAGGCGCCGGTTGAAC  
CAAGGCGGTGCCGACCTTCAGCACCGCATCGCTTCCGCATACCAAGGCGTCACCGA  
CGCATGGAGCTTGGGCATCACAGCATCCCGGCCGTCGTGGTGGACCGGCGCTATGT  
GGTCTATGGCGAGCCTGACGTGGCGCGTGCCATCGCGCGAATCGAACAGCATCGGA  
GGACACAGCCGTGATCCGCCTATTCGACCCGTTGCGCCGCCTGCGTGTCGCGGTGGC  
CTCGCTGCTGCTGGTCAGCGCCACAGCGAGCTACGCATTGAATACCGCAACCATCGT  
CGGTTTCAGTGGCATCGCCAGAT

>CONTIG\_208\_length\_2139\_cov\_16.749006

CGGCACGTTGAAGTCCAGCCGCTGCGGGCTTGGCCGGCCGGCGTGTTGCTTGCGGCC  
ATCAGCCCAGCAATTACGCCACCACGCACACCCGGATTACTCAGTGCGGCCGCACC  
AGCTCCTGTGCTGTTAGCGGGCGGCGGCACTGCCAGCGCCGTGGATCTGCCAGCGGC  
GGTGATGGTCTTGGCTGCACTGGCTGCGCCCATGCGGCCAGCGCGGCGGCACCAA  
CGCCGGCACCGATCGCAGCTGCGCCGGCACCGATTGCCACGCCGGCCGCACTGCCG  
GCGGTCAAAGACGGCGAGCCTGAGAGCAAGCCACCCGCCACTGCCGGGGCATGCAC  
CGCGAGGATGGCCATAACAGCCGCTGAAACTGCAGCTAGGTAAGTCACCAGCAATT  
CGGGAGCCGGTGGCACCGTGAAAGTAGCCATAACATTGCCGTAGACAGCCATGATG  
AAACTCAAGACCATCAATTTGACGCCTTGGGCTATGACGGCTCCGATTGCCTTTTCA  
GCAAGGAATGCCGTGTGGTTGCTTATCCCCACGGGACCAGGATCAAGCCAAGCAC  
CGACACCAGATAGAACTCAATGACGGTGAGCATGCACGTGAGCGCCAACACGGCAA  
ATGCGCCGAGAATAAAAAGCTCTGCGACGGTGTACTGGACAACGACTGCGAGCATT  
GCGACCTTGTCATCCAGCTGCCGCGCTGCATGTCTTTGAGTTTATTGTCAATCGGCT  
TGATGACCTCCATAGCCCTGTCGAGGATCGCGCTAGGATCTTTCACCAGGGTCGCGG  
TACCGCCGCCGGCTAAGGTACCGATCTGCGCCAAGCCACTGGCGACGCCGTTGGTC

AACGTGGGCCACGACGCCACAAGGAAAGCAAAGAATCCGATCCGCAACAGCTTACG  
AAGGAATGGCGCGGTGAAGTCTTCACCGCGCAATGACCAAAACAGTGCAGCCAACG  
CAACTTCTATGGCGGCTAACGTGCCCAGAATTGCCGACGCGCGGGGCGTCAGAATT  
CCAAATCCGTTGGAAAAAACGTTGACAAAGTTCTGCAACAGCTGTGTGAGGAAGCC  
TGTCGTGGTCGGGTTTCATCGCTGTCCGTCCTATTGCTTAGATGCAGTCGCTGGCATGG  
TTCGCGCATCCGGCCACCACTGTGAAACCGACTTCGCCGGCTCCACAGTGGACGGTG  
CGGAAGCATCGGATCGCTTTGGCTTGATGGCGGATGGGTGCTCGCCTGGTGCAGGGC  
ATGCACGTTGCGCTGCGTCGCCATACGCGCGCGCTAATAGCGCGACTGAATAGATG  
ATCTTCTTCACTTGATAAAATCGACATCGGCGGGGGGCACGGTCGATTTCTCGTAGG  
CACGATTGCGCTGCATCCCGACGCAACCTCCATAGGCGCCACAAAAATCCAGCTTA  
AGCTTTGCATCAGCGCCAGCCCCCTTCCCGTATGCGCTATCTATTTGATCTGCACACT  
CTTGGTCGAATGCAGCGGGCTGCCGGCATTTTTCCGGCAAACCTAATTTCTCGATAA  
TCGGAATTGGTTCATCGCCAGGAATGCTGCCTGTAGCCGAGACTCTATCGGGAACCG  
AAGCGGTACGATCGCCACCACCCGGCGAGGGTTGCAATAGCAACTAGCGCGACT  
GAATAGATGATCTTCTTCACTTGATAAACTCGACATTGGCGGGTGGGACTGTTGATT  
TCTGGTAGGCACTACTTCCATAGGCTCGATTAATCTCAATGTTGTTGCTTGGTCAGA  
CGCCATCTGCCGGGCCTGCTCCTCAAGCACGGCCTGGTTCATCGCCGCCGTTTGTGC  
GTTGAGCTTCATCATTTCTTGGCCGACCAGCATGTTGATCTGATTGCCGGCCTGCGTG  
GCAGCAAGGGCACCCGTCGCCGACTGCGAGGCCTGGCCCATCGTCTCGAACTGCTG  
GTTGGTGCTATCCAGGGTGTCCAGGACGGCGGGCGCCGCTGTAGAGGGCGTCCTCTAC  
GTTCTCGCGGCCCTGCGATTGCCACTGATCGACCATCGCGGAAAGCTGCTGAAAGGT  
CGCGTCATTGGTCACTTGGGGATAGCGCTGGGCGAACATGTCGCGCGTGTTCGAG  
CTTCGCCATGCTCCCGCGCAGCTGGTTGATGCTCTGCTTATAGG

>CONTIG\_209\_length\_2137\_cov\_239.403980

GCAGATCCGTACTGCGCATGGCAGCGAGGCAGCAACGAAAATGCCAACGGATTGAC  
GCGCCAGTACTTGCCACGACACATCGATTTTCAGCACCATCACCGATGCGCACCTGCG  
ATGGATCGAACAGCAACTCTACAATCGTCCGCGCAAGATACTCGGATTCAAAACGC  
CCCTCGAAGTCTTCTCCGAGGAGGTCCTCAACAGCGTTGCGAATCGGAGTTGAATCC  
GCCCCGTCAAGTTCGGGGCCTACACGCTAGGACTGACGCCTTGGTTTGCAGCTCTTA  
ACCAGCTTGAGGACGCCAATGGCGGAGACCGTGAGAAAGCGATCCAGCTATCAATG  
TTTCATTCGTCGAGACTCGAAATCCTCAATCAGCTCTACCCGAGAGCTGACGAACTG  
AGGAGGGTGATAAATCTCTATCACGGAACCAACAAGCAACTTTTCCAAAAGCGCGC  
TGCCGAATTTCTTGGAGAAGAACAAGAGCAATCTTTGCTGCAGCAAGATTTGAATGC  
AACATTGTATCGCGTGATTGCCAAGGCCTTTTTCCCGTTTCGTAGTGCATGAGCACGG  
AAGAGAAATTTCTGAAGAGCTTCCCAAGTTGCTGCATGGCGTTGACCAAGAGCAGC  
TTGGCTTGTTTATCGCAGACCTATTTACTACCGGTTTCTTGACAGATCTGCAGAGAGA  
CTGCCTGCGCATTTACCCTCGCATATTCGATGCCGAGATCCCATTTAGGCCAGCGCT  
ATTCTTGACTTCATCGAGCAACAGGAGCCTGAGTTGGTAGCTGGTCGAGTTTCGTC  
TCAGGATTTCTTTGGATTGAAAGATCTATACAAAGACATACTAGAGATTATTGCCAG

GCAGATCGTGCTGATTGCCGGAATAAACAATCTTTATAACCGCGGCAACTTCAATTC  
ATTTAAAGCAATAAATGGCGGCACGCTTAGCAGCCTCCAAAAGCTATCGGAAAAAA  
CGTTATCCGATAAGTTCAAATATCTCGATGACTGCTGGTACAAATTGTCGATTTCTG  
ATCTTAACCTTGGGTGCGGAACGCAATTGCTCACAACAACATTGATTACAGTAGCG  
AGACACAGACCGTAACGTATTACCCAGAAGGTGGCCGGCTCAACGTGGCGGAGGGG  
AAGAGCGTGAGCTTCCTCGCTTTTATGAGGTCACTCCTCTTGGCATTTCGGGAGATG  
CATAATTTGCATCACGTGATCAAGTCTTTGTACTACTACAAAATCCTGATCTATGACC  
GCCGCGCCAGCAGAGTGAGGCCTAACAAATTCATTCAAGCCGAACACGCTTCGCGG  
GTCGGCTTAATTCAGGCGTTAGGCCTTTGGAACAGACCACAAATGCAGCCGATTGAC  
CTGCTCGCCCACTATCGTGAGAACTTGCATGACCTTGCCTCTGGCGAGCGACGCGAC  
GCTGACTTTTGCCGCATTGCATTGCAACTTTGCAAGGATCTTCCTCATGGCACGTCCG  
AGGATCTAGAAATTCTGGATTTGGCGTTATTTAGCGTTCTTAAGCAAGCCAATTGGC  
CTAAGAAAGGGCTTTTGCGCTTGCTTGGAAGAAGTGGCTAAGTTACAACATGGCA  
CATTCAAGCGTCGACCCATTCTGGGATCGAGACCAGATACTTCAGCTTGCTAGCTCC  
ATAGCCAGAACTTCCAAGCACTATCACACACAGCTCTTCGGAAATCACAGCAGCGC  
GAGCGATAACCAACGACAACCTCAAGATCGCCATCATGTTTCGTATGCATAGAAATTG  
GTCGGGGCATCACGCAATCCCGTTTTGCATCACTGCCAAAACCTCGGGCCATAGGCCT  
AACAAATTCATTCAAGCCGAAGCCACTTCGCGGCTCGACTTTTACATCGATCGTGTAG  
GTGCTTGCTCAACCGTATCCTGCTGCGACCGCTGCGTATCCAAGGCTTGAGACTGGC  
GGACGCTTTCCTGCAGTGAGGACGCGCCTCAGACAGATCCACCTTGGCCCCGAAG  
CCCGGCGTCTGGCCAAGAATAAAAATGCTTCCTTGGTGTAGGGTCACGCTCTGCAGC  
TGATCGTCACGAAGGATGCCCCGCGCGCTTGCTTCGACGGTGGCGTGCATTGCAACC  
TCATCAGAGATGCCCTCTGGCAGCTTGCTGTGAATCG

>CONTIG\_210\_length\_2134\_cov\_10.943697

CATCAGAGGCTTGGGCAAGATTGATACCTCGATTGATACCTCAAGGGGCATCGCTCG  
GAATCATCAATCGGCCGGAATATCCAGCCAAGTCAGACACTTAGAGACTTGGCGGA  
AGCTCTGGAGCGGGTGGAGGGAACACTACGCCGCTTCCAACCCATTGATATAAAAT  
AAATTTATCCCGAATGGGTACGGGGTTAGACCGCATTATGTACCGCCGTTGTGTCC  
TCGACAACTCTGCTGCGTCCACTGAACGCCACTGAAGTCCATGAACAGCCATTGCCT  
GCGTTTTTGTATTTTGATACGCGGTAGGTCCCCCTCTACCGGCACGTTGGAGGTTGCA  
GGTAGGTGCTGTCCCTACTGCGGCCGATCTACCGTCAACTCAGTGTGAACGGTTGAG  
TCAATGGCTCTAAAGCAGGCTCAAGGTGGCATAAGTTCGTACGCTCACAGAGGGTCTA  
CCCTCAGACTGCTGCTCTTGATGCTTGAGATACCGGATCGCGCTAGGTCAGACAGCT  
TGCCAAGATCGCGGATAAGACCTCATCCTCTTGTTAGCGCCAACCCAAAATGCAGCA  
AAGCAGTGCGACTACCTGCAGAGCTATTGAGCTCCGCTACGGGCTAGATCGCGTGC  
GCTCAACCAAACCTCGATACGGACAGTCACGGGACAATATGACGGAATCAACATCAA  
CCACGCCCCCAGGTGAGGGAGAGCGCAACGCACAGCGCGGTTTTGTCCAGCAGTAC  
CGGTCAGGCGCAGCAGCGATCTATGATGCACTCGACAAAGACCAATTGAACTGGAT  
CGGCGTAGCCGACCGTAGTGCAGGCATTGCCGATGACTTGGTGTAGGCATGCCAG

GAAAGGTAGTGGGGCACCAATTTAAGACTTCCGCTCATGCCAAACCCTTCCAGATTG  
AAGCACTGCTTTTGGGTGCAGAAGGCATGTTGCTTAAACTAGTAAAGGCTTGGACAA  
GCCTCCGCAGTTCACATGCGGAAGCCATCACGGAAATTCGTTTCGTGACCAATGATA  
TTCCGTCGCAAGCAAATAACGACCATTTGCTCAATGACAAGGACGATCACAGCGCG  
GCTTTTCCTTCAGGAGTTTGAGCTGTACCATGACCGGACCTTGGTTGAATGGAAATCA  
ACCCGCTGGCAGCCCTTCATCGACAGGCTGTCTGCAGCCTCTGGCCTCTCAGACACA  
GCCTTCGAGGCTTTCTTACACTCCGTATACTTTCTCACCGGCTCGGCCTCTGACTTCA  
TCTTAAGCCACCGTCTTCGACCTGAAATCCATAATTTGGTTCGAACAAATTGCTGAGA  
AGCTGCCCTCTTTGGTTGCTGATAAGCGCAACAAAGATCGATGGAGCCGCCTTGAAC  
TACTTGCAGAACTCGGCTGGTCAGACAGGTTCAAGGTACACCGTACGCACCAATTTTC  
CTATCGGCGAACACGTTTCAGCGAAATCGTGAATCCGAACAAAATTTACTATCCAGCA  
TCGATCAGCACTCCCATGGCTACCTGTCGCTCGTCGGGCCACCTGGCACAGGGAAAT  
CGACACTTCTTCAATCCACTTTGAGTGCAAATCCAACATTACAGTTGGTGCGATACT  
TAGCTTATATGCCGGGTGAAGGCCAAGGTGTGCGCCGAGCGGAGGCAGAAAGACTTT  
CTCGATGATCTCTGCACTCAGTTGAGGCAAAGCGGCCTGCCGGGGCGCCGGGGCGCG  
CAGCAGCAACCTTCAGGAAAGACAGCAAGAGTTTGAACACTTGCTTCATCAAGCCG  
GGACTAGATTTCAGTGATCATGGCATTTCGCACGTTGATCATCGTTGACGGACTGGATC  
ATATCCCTCGAGAAGAGCACCCCTCCCGCTCACTGCTCGCAGAGCTGCCTTTGCCTG  
AGGCATTGCCACGAGGTGTGTACATCCTCCTCGGCACCCAGCGACTGGAATAACAA  
GGACTCAAGCCTCAGGTTTCGATTACAAGCTGGACAGGCCGATCGCAAGACTGTGAT  
CGCACCTCTATCTGAAGAGGCGATCTGATACGCCAGGGTTTCTAGACATCTCAAG  
GCCATGGAAAATAGTCGATTTCGGAGGTGTCTATGAGCAGCAAGCGATATACGGATG  
AGTTCAAGATCGAGGCGGTCCGGCAAGTGACTGATCG

>CONTIG\_211\_length\_2132\_cov\_10.309726

GTTCTCGATGGCCATGCTGTGCGGTGGTCACAGCGATGGTGCTGAAATTCACAGCAAA  
AGTGGCCGCGGCCTACTGGGCTGCCCCACTCATCACGCTGGGCAATGCGGAAGGAC  
TGTCTAGCCAAGCCCTACAACAGGGCGGTATCGGACTGGTCATGACCTTGTTGATCA  
TAAGCGTTCCAACGTTGGCGGCTGCAATTTGGCAGGGTAATATGGGAACGTTTATGG  
CCTACTCCGCATTTGATCGCGGTGGCGGAGCGAGTCCGGGGGCCACAGGGGGCAACCT  
GCTGGGTTTATTCTCAGCAGAACACAAGGAACGGTGCTAACTCTTCTAATGAGGTA  
AATAGAAGCGAAAGCAACGCGAACCTAGCGCGAATGCCAGATCAAAGCACGGCGT  
CTCAGCCTTCGGGGGCTCGCGGCTTGGCGGGCTCCAGAGACACTAATATCATTTAAG  
AAATGCAGGCTTTTTTATGAAATTTTAAATATACCTAGGATTTCTGCCGCTATTTTTT  
TCTATGAATGCTTGGGCTGAGCAGGGTTGTCCGCCAGGCCAATATCCGATAGGTGGC  
CAAGGTGTAGCCGCATGCGCTCCGATTCCCCAAGGAACTCTGAACAGACAGCACC  
TGCACCTCGTCCGCTAGGAAAATGGATCAATACTTGGGGGGCGGTTGCAATAGGAT  
CCATTGAGCTTGAGCAAACCTCTCGGCGTAACAACCGGCAAGCTATCAAAAATCCGAG  
GCGGAAAGTGATGCGCTAGCTCGCTGCGCAAGGAGTGGCGCAAAAAAATGCCAGAT  
AGGCTTAGCATATTTTAAATCAATGCATTGCAGTAGGGGAGCCGCAGATTGATGGAA

AGCCAAATATAACAGGTAAGGTTCAATTTTTTTGGAAATGCCTCACGTGAAAAGGCTG  
CCGCCGCCGCACAGAGAGCTTGCGAAGCCAGAAATCCCGAAAATCAGTGCAAAGTA  
ATTTACAACGCATGCACTGATCAAATATTCAAATATTTTTGATTGTCGAAATCGCAT  
GCTTTGATTGCTCGAAAAATAGCTGAACACCTGCGTTGCACAAAAAGCGGCTTTCAA  
TTGATGAGAATGTCATGGACAAACGTGGATTGTTTGCTGCTCTCCTAGCGTATGCCG  
TCCCTCTACATTCTCCCGGTCCAGACTTCTGGTTACTATGGGTTGATACCCTATTACA  
ACAACGATCCGTTTACTTTCTGCAAGCTCGTCCCCCTACCTACTGTTGGTTGCCAGTA  
GCCCCCTGCGACGGGGCTTACGTAGTGACCTCACAAAATTGTTTCAACCCAGTCTCGG  
CCCAGAGGTTTGCCTCATCTGCCCCATTGCTTACCGCCATGGCATGCCGCAGAGCC  
CGTCAGTCGGCAACTCGCAGTCGTTGAATCCAAAGCCGAAAGCCGCAGGAACAATG  
TGATGAATAAGGTGCTGCCCTCTTTAGACGTAAGTTGGTACCTGTCAGTTAGAGGGT  
TTCGTCATATGCTGACGGTTCTCTTATTGACGACCTTGCTCACCGCTAGTCTAGTTGT  
CCTAGGCTATCGTACGTCATTTGTGCGTTTGTGTTGAAATCGCTAAATATGTAGCCATC  
ATCGGTGCTGTTTTGCATTTTCGTCGTGGTTTCGATGCTGGTGGGGCTTATAGCGCACG  
CACTTACTGTCTGGAAGAAGCTGCGAGTAGAAGAAAAAAAACCTACGAATTAAGAC  
AGCTGCGTCAGGGCATCGTCAGTGACGCCGGGGTGACGGCGTTGATGTTTCTTCTGG  
CAGTGGGAGCAGCGTGCGTCCCCGCAGTGATGAAGATAATCAGGGAAATCCCAGAG  
TTCGGGATGGTATTCGCTCTTATGATCATTGCCTTGCTGATACATGGCATCAACATCA  
ACCGTGCTGTCGGCGACTTACCGACTCAGTGACGGCCGCAAAGCATGCTGCCCATC  
GCACGATGGCGGCATGAACGGATATCTGAGAGTCAAGATTGTCGGCGGGTTTTTCCT  
ATTTTTCTGAGGATGCAATCCCATGAATGCTGCCTCTGAAAGACATGACAGCGG  
TGAGACCATGGCTGACGGCGACCCGATCTACCAGAAAAACCCGCATCCGACGCAAG  
CGTATCGGATCACAATGACAATCGAGGATG

>CONTIG\_212\_length\_2128\_cov\_6.243878

AGCAACTTCAGACAAGGATAGGACGCATGCGGAAATACGAAGTTGTATCGCAGGAA  
GACGAATGGGGTTGTGCGGCTGCCTGCGTGGCATCGATCTTGACATCCCATACCAG  
CGGGCAAAGCGCTTACTGGAGAAGGAAAAGTCGGGCGGAATAGACGACCACCCAG  
AAGGCTTTGAGATAGACGAGATAGCCAATGCTCTTTACAAGAAAGACGTAAAGGTC  
GTTGCAGACTGGAACCTCCCGCGAAGCTGCCCAGTGGCACCATCGTGTGTATCCAT  
AGCCGGGTCAGATATAAGAGCTATCACTACCTGCTCAAGGTTCCAGGCGGCTACATG  
GACCCTTGTTTCGACTTGAAAGATGGAGTCATGGAAGTGCAACTGCGCGCGGAACT  
ACCCAAAGGGACCAAGCTTGTAGTGCCCTTATTCCGAGCAAGAAATAAGGCTCTT  
AAGAGGAGCCGTGGCTTGGTGGATGTGAACCTTGAGGGCGGCAGCACGGGACTGCC  
GCTGTCGTCTGCTTCTAGGGACAGGTATGAGGGGACGGGCTATGCCACCCCCCTTGC  
TGCTAGGCTGACGTGCTGCCGGCCACCGATGACTAGGTGGTCGAGGACCCGGATGT  
CCAGGAGCCCCAAGGCCTGCTTCAGACGCTCGGTGACTTTGCGGTCTGGCTTCGCTTT  
GCTCCGGATTGCTGCTTGGGTGATTGTGGAAGAGGACGACGGCTACGGCATTATCGT  
ATTCCAGCGCGAACTGGCCCGGCCGACGAACCTCCAGACGATGTGGCTGAGCGTA  
TCGTGCGGCCTCCAAAAGCGAGCAGCACATCACCTTGAGGCCTCACACCGTTTCGAC

GGGCATATGCGGCCGTTTCGGCGGAATGAGCTAGGTTGGCCGGGTGTCCATTTCGTCTGT  
TAAACACCCGAGCGCACGTAGCCCAGGCGTTTCGTTCAGTAGCTCACTGAACTCACCA  
GTTGTGCCAAAGCTTCCAACAACGTCCCCAAGTCGATGGGGAAGACTCCGTCTCCAT  
CCAGCCCCCTCGCCAGTCGGCTCGAACGAAAAAGCCCAGCTTTCGCTGGGCTTTTTCT  
AGGCCTTGGAAGGCGCTAGGTGTTGCAAGGCCTCGAGGGCTATGGCGCTATTATACC  
CATGCTCGCATCTCGGTCAAGACCCCAGTCTCATCGCGCTTGAGCGGCTGCCGCAGG  
GGGCGGCGGCGCCAGCAAGCTGGACGCACTTAGAATTTTGATGGCTGCCCCGCTGAA  
TCGCCGCAACGACGTCCCTAGGCAGCAGAGTCTTGACCGGCGCTCCTAGATTCTTTA  
CTTGGA AAAAGCCGCTCTTTGCTGACATGCGAAATGCATTCGGTGACCGCCCACCGTT  
CCTTTGCCTCCCAACTTGAGTTGCAGGAATCAGATGACTCGGAACATGCACGTGAA  
TGCCCCGATTTAGGGCGTCAATGTTTCCGGTTGAGGAAAGAGGAATTACTAGGCAGC  
AACCGTTGGGCAACTTACCGTTCAAACGACCGCTAGTCGATGTTTGATGATTTTCAT  
TCGGCAGTCCGCCATCAAACATTGGCGTGAGGCGGGGATCGCGGAACCGCCCCAAAA  
TCGCATTCTAAAATTTCCCCCACTTTGGGGCTGTATGTAAGCGCCAATGCTTTTACCC  
CAAAGCGGTGAATTGTGCCAGAGATGCGTGCACTGCGTGCGGGAACGCCTGCCGCA  
ACAAGCGTCGCTTGACGTAACGAGGCTCACGAGAGCCGGCTTCCTTTGCTGACCGT  
CGCAACGCGTAGCCCAGCCAATGATGTATCGCCAGCACGGGGGAGTGCGCAGCTCC  
GCCCCATCGCTTTTGCGCTCAGGCCGTGTTGGTGCGCGCGTTGAGCTTCCAACGCGCC  
ACGCCTTGCTTCGGCATGTAATGTTGATGGTTCTGCGGCAGCGATGACGCTCATCGC  
CCAGCTATACGTATTAATCAGCGTATCGGCGATATCTCTTCACAATCGTCTTCGATCA  
AGCCTAATGCGACAACGATGGCCATCGGCCTCCACACAACCCCGCGCACGTGAAA  
CGCCTTCATTCTGCTCCTTGGAAGTGCATCTGCATTGGCGGTCTAGCTTCGGCAGGC  
TGCGCAGGTGAAGGGGTGGGCTATGCCACC

>CONTIG\_213\_length\_2126\_cov\_16.274137

GCGAGCCACGCGTGTTTGCCCTCGCTCGACACCGCCGCCACCCAGCTGCTGGCGCTCG  
GGGTGACGGTGTTTCGAGGTGTTGCCGGCCAACTACGTGCGCGCGCCCAAGGTCTAC  
CGACGCGGCCGCCCTGCCGCGTTGAAGGAGTTGGCCAAGATCCAGCGCGAGGCCAA  
ACCCGCCAAGCCGGCTAAGAAGCCGGCCGGCGCGGCGGCGGTGGCCACCGCCGCCA  
AGATCCTGCCAGCGATCGGGCGCAGCTGAAATTGCCCGGCCTGCCGCGCACCCGC  
AAGACCGCCCGCACCGCTGGTGCCGGCGCATGAGCGGCACCGTCCCGGTGGAAGGC  
ATGACATGGGATCTGGGAGCCTTGCGTGAGGACGTCAGGGCGGCGTTTGCCCCGA  
CCAGCGGCGACTTGTAAGCGCAGAGCATCCAGTCCGTGAGTGACCGGCGCAGGTTCA  
GTGCCTATCACTACCGGGAGGCCATGCGGATCATTGCCGCCAAAGTGGACGGCCGG  
CCTGGCGATGAACTGTTGCCGATCATGATGGGAGTCGATGACAACGACACAGGCTC  
ATTTGAAGATGCCAGGTTTATTGCTTACGCCAACATTGTTGCCTGCATGCATAGCAT  
GCGATCGGTGGCGGATAACTTGGTGACCTAGTCTATTACGCCACCGGAATGAATCG  
CGATGCGGCGACCTGCATCAAGAAAGAGCAGTACATTACGTGGGAGACTGTCCGTA  
AAAATCTGATCCCAGCTGCCGTTAAAGCGGAGTTGGATGCGCTACATGAGCATGCC  
GATTTCAAGTACCTCCGTGCGCTCGACAACCATTGCAAACACCGCAGCATCGTCGAT

ATTGGCTATGCGATCAGCTTCACTGAAGAAACGCACGGCCTGCGCATCAAAGCCTTC  
ACCCATGATGGGATCGATCACGCTCCCCAGTGGGTGAGGCCGTTTCTAAAATCCGAA  
TATCAACGTCAGGAAGCGGTGATCTTGCGAGCGGGAAATCATCTAAACGGCTACGT  
GGCGCAATGCCGCAAGGACTCCCAGCGCGCATCCACGGCTAACGACTAAAATCCCC  
GCAGCCGTAAATGCTCGATCTTGATCGAGGTGTCAGCGCTGACCGATCCAGCGCCT  
AGCAGCGAAGGATGCGGCGATCACCGAGCTGTTGAACAGCTCGCAGCCTGTTTTAA  
GGGACCGTGCGTAGCATCACTAGCTTGGCAGTGGTAATCGTCTCGGAAAAACCACC  
ACCCTTGAAGCGCGCGGACTCGCCAGGCTCTAAGTGGTTCGAAGATTACCACTGCCCC  
CCCCTGACTTACATGTCCGTCCGCCGTATAACCTTTGAAATCTGCCGCGATATACAC  
GGCGTTCTGCGTGTTGTTGGTGACTTCGCCGACGACAGAGTTGTGCTCGCCAACCTT  
ATAGGTGATGTCGATGTCGCGAGCATGGCTGCCCTCGTAATGCGCTTGCGCTTGCGC  
TTGCGCTGTCATGCTATAGGTGCGGGCAAACGCAAGTAGCCCGAACATGGAAATGG  
CTTTCATGGTTTCCTCTCAATTAGGTGGTCCGGGCATCGAGTCTCAACTTCTCAATCG  
GGCCGGGCAACGGCTCGCCGTACTGGCCGGCCCGCACTATCACTGCATCCCAGTATC  
GGCCTAGTTCAGCGACATCGAGGTGTCGCGTGGTGTGGCGACATACGCCCTACCCA  
TACAGAACTCGCAAAAAACGTCCTGCCCAGGCAACCCGGGCAGCAGGCAAATTGC  
CAGAATCCGCGCGGCATGAACACCCCAGACTTGCACGACCAGCACACGATGCCCGC  
TTGATCCATCGTCCCGCACGGGCTGCCGCACGCATCACACACGCCAGGTGGGCCGA  
ATAGCCACGGATCGAGTCGAGGTGTTTTGCGATTGCCCATGCACCACATTACCCATG  
CCGATGTCGAGAACATGCGAAAACGAGGCGGTGCCGTGCGTCTGATCCAATCCAG  
GCGGGGGCGCGGCCGCACGCGGCCACCGGCTTGGGGTGCTACGCACCGATGCCGCG  
TGCCGCGTCATCGCCAGTCGGCCCTAATCCTCGCCCCGGCGCGCTCCGCTTGAGAA  
GCAAAACCGCGCCCCGTCCAGCACGCCGTTTTCCGAC

>CONTIG\_214\_length\_2119\_cov\_7.008534

CTCTTCCTGGGCCCCGTTCCGGCTTCATCGTCGGGCCGTTGATGGCTCGGAGGGGACTG  
CGGAAGGCGGAGCGGCTCTACCCGCAGGAGGCCCTACGCGGCTCGGCGGCGCGACCA  
AGGGTTTACCGCTGCACAGTGGTGGGTGTCATGACCCCATTAACGGTCATGGGGGCTTT  
CTGGGTCAGCTCGATGCTCAGCGGACTCCCCATGGTGCTGCTTGTGCTGTGGCTTCA  
ACTGACGCGCTAGACCCAAGCACTCACTGGGGAAGCGAAGGGTGCCCTACGACGGC  
GCCCAAAGCGCTGCAGCAAAGCCTCATCGACGAAGCCGTTGGCGTGACGAAAGTG  
CGTAGACCTGAGAGAGGCCTGGGCCCCATTACTTCCCTGGCGGCTTGGTGGTGAAGTA  
GGCTTCAAGTAAGCGATTTCATGGGAGCCAACTCATCCAAGGTATGCGGGTCTTTAAG  
ATATAGATGATGTCTTTAAGGGCCAGCTGACTGCTGTGATAATCAGGCCCATCCATC  
CTTGGGCGGACGCTTTACTTATGGAGTCAGGGAGCGTGATAAAGCTCGCTTACTTTA  
CCTTGCCACCGCTATCTGGCTGAAAGCGCTTTTCCAAAAAATAACATCATTAGAAAG  
ACATTGGCTTGGGGCTTTCCCCGAACAGAAGCCCACTTTTAAAAGCAGCTTCCGCC  
AACTGACTTGAGCTAACGCATGTAATCTGTCAAATATTCTATTTATGTCGTAATCA  
GCAGCATGCCGCTCTTCTTGAAGAGTGACAAAATGACGCGCCACGTCAGCCAGTTC  
AGGCAGGACTGCTGTTGATATCAACGCTGAATATGGCCTGCCTAAGTTAGGCTGAGA

AATACCCTTGGCCGCATTTTTTCATGTCGCCATGAGTGAGTGCCCTTTGGATATGTCGT  
CCTATCCCCGCGGGGCTGGGCGGGGCTTACAAGGCTTGCGGCCTCTGACGACAAAAG  
ATGAAATAGGGCGTAGTAGGCAGTTGAAATCGCTCGCCTAAGGCTAGCCTGTTGCG  
GCCTTCTCTTTTCTTTCGTCGCCAAATGCCTTGCTTGACGCAGGAGGTCTTGAGGGAG  
CGCCATTAACGCTTTTTTACCCATCCCCTGACTAACTCGACATAAGGCCAGCGGGAA  
ACGCCCTGGCTCAGCGCAACCTTCTGCACCTCGTCAGCGAAGCTCCTCAACTCCTTA  
AATCTCTTTGAACTAGAAAGCTACGGACTTTTCGTTACCTTCAGTTTGACAAACAAC  
GAAGAATCCCCGCTCGAGTCATCTCCAACCTTGATGTCGTAAGACAACACAGTATTA  
GGGATCCTCATTGCCTTTATAAGGCTATCGAGGACTTTGCGGTCTTCGGATTTCGGAG  
TGGATAATAAGGTCGGCCATGAAGAACAATTACCACAGATTGATAAATCTTGCAAC  
AGCAGTGACGTGTGAGACCTTTGATGTGATAGCCGAACCCATCACAAAGACCAATG  
CCGCTAGAAGGCAGAGCGCCTCCGTGATTGATTTTTGCAGCAATCCAGAACGCTAGA  
TTAGTAGCGCCTTCTCGCCGGCGTCCTCTTCTACCGTTTTTTTGCAGAGCTGACCTGAAT  
GTAAGCAAAGTGCCCGACCGGCGGACCGAACTTAGCAAGCGTCTCCGCTTTATCGG  
ACAAGCTAGTGCGATCGATGTAGAAGTTCTACAAGACCGTCTGCCCAGTCCCGTCCC  
AGTGAGGGGTCTTCGCGGAAGCCGACACTCCCGCTTCGCCGAGCCCGGCAACCCA  
GCCCCGTTGAGTTGGGTAGGCCTGGAAACAGCCGCTTTACCTGAGATTCCTCCAAGT  
AGGGAAGGAGCTCGGCCTCGATGACCGCCTAGACGCTACTTCCTCTTGGTGCCGTAA  
GGCAACTGATTGAAAGGCTTCGGGGATACCCCCTGTTTACGGGCATGAGTGGTGATT  
GATCTTGGAGTCCGTCCCATCTTCAACCAATGATGCGGATTAATGATGCGGATTTCGG  
GTATCACCACCTCCGCGCCCCCTCCCGCGGCCAACGGGGAGCCGATCACTGAGGCTA  
GCAACGGGCATGAACAACCCGCTACAATGGCAGACCACAAAGCAGGACACCCTCCT  
GGTTTGCGTGGCTGTAGGA

>CONTIG\_215\_length\_2115\_cov\_18.964789

GATCATCTTTGGTTCGGGCGATGGTGACTCGCTTGACAGGGCAAAGCCATATCGCTCAA  
TCAGGCGATGTGCGATATCCAGGGTCAGGTCCCAGCGCTTTGGGTCATCAAGCTCGT  
GCGGCAGCGCGATGGCGAAGTCTCGGCACACGGTGCTGTTGCAGCGTCGCTCTGCT  
GCTTCAGCAGCGGCCCAAAGTGCTTGCGGGTCATCGGCCCATGCAGGCGAACCAAG  
TGGCGCCATGCAACGCGATTGGATGATGCCTGCCCTACCCCGGTAGTCGTGGCGAGC  
GTCCGACTTGGGATCGGTGAGCAAGTAGCCGCCGCGATAGGCCGCAGCTGCGATCG  
CAGAATTCCCCTTTGATCGGCTATAAGTTTTGATGCGGGTGTGGTAGATGGCCATGC  
GTTTCTCCTGATGTTGGAGAAACACTTTCTCTAGATTTTCGAGAAGCGCAAGGCCTTT  
GGGATCACTATTTTTTCGCTGCTTTTCGTTGCCTAACTGATGGAAGTAGCGAGCAGTTC  
GATCGACCTCAAAGATGCGTCTCAAGCTAACGAAAGGCCGAGACGGATGGGAGAGC  
TCAGCGCTCCATGTAGCAAAGCGCTTAACCGCGCCACGGGGATGGTCACTACGGGG  
CTGTCCATCCATGCCAAACGCGATCTTGTCGCCGTCCCCCATTTGGCTGGGCATTTG  
ACCAACCACCACCGGCCCATGTGGCGTAAGTGATAGTGATGCGGTATCCACCACGT  
CATGTGCTGGGAGCGCTACCTCTTTCCTGATGCGAACCATCCGAACGGCTCAGCCA  
GAGTCAGACATCGAGTCATGCCCTCTCCTACCTTGAAGAGCGAACCTGCGCGCTCGC

CTTGAAGCATCAAGAAAGCGAGAACAGGCTCGCCTTCTTCCTGCTGATTGTTGACCA  
ACATTGCCCAACTCTCTCGGAACAGAAAGATGCTGCCAGGTGATAGGTCATTGGGA  
AGCCGATCTGCAAAAGCTTGTGCGGGAATGCTCATCGATTTCTCCCGGTTGACGTCA  
TGTTGGGCGTCAGTTGATCCAGCGGCGGCGCAAGAGCACGACCAGGTCTTCTACGAT  
GCGCTGCGCGTCCATGGACAGCGCCTGCCTGACTTGATGTGGTGGCGAAAGAAGCA  
TGGGCTCTTGGTGCTCACCTGTGCGCAAGGCACTTGCATGCTGTTTCGGGCTGGCGT  
CGTGCTCAGCGCGAGTCCTCCAAGCGCCGGCGTGCTCGCCGATTAATCGCACTGCCG  
GCACCACGTGGGTAAAGCCGTTCCGGTAGGGTCAATCTGACCCAGAAGCCAAGCGGCA  
TAGGCGATCGCCGCTTCAAGCTTCTCTGCGACGCTTTCTTCCAAGACCACCGATAGC  
CCCATGTGCGGCTCGGGAGGTGGCACGGGCAAGCTCAGGAGCACATCCCCATTTCGG  
CCAGAGCCGGATCGACGCACCTTCGCTGCGTGACCTTCTTGGGCCAAGAGCAACG  
CGTCTCCCTCTAAGCGCGACTGCATCCCCAAGCCACGATCAAAAATGGAGGGTTTTTC  
CGAAGAGCGCATGCTGTTGCATGGCCTCCAGAAGAGGCTGGGCTTCCACCTCGGCG  
GGCGAAGCACTGTTGTGTACGGTCCAGCTGCAACAGCAAGCTGCAAGACCGTGCC  
ACTTTGCTGATAGCCGCGCTCGATCCGTGGGAAGAGCGCCAGTGCACGATCGCGCA  
ATCCTGTGGAATCGAGGGGCGCCACGGCCTGCGTCAGCTGGAACCGATGGATGGCG  
CGAGTTGCCTTTTGCCCCAGGTCATCCGCCGAGACAAAGCCATCCCAGAGCTGACCA  
CCTTGCCACTTGCCAATCTCCTTAATCAGTTCGGCTTGATCCGGTTCGCTTCCACGC  
CGGACTGCACGAACATCAGAAGTGGCTTGCGGCTCCGGGCCTCATGCACCTCTTCGT  
GCGTTGCTGAAACGCCTCCTGCCTGCTTGGTCCCGTAGCGCGGTCCAAGAACGAGGA  
TGACAAGATCCGCATCGCGCACGCCACTCAGACATGCGACTTGGGGAGAGCTGGCT  
CGGGCGCCGAAATCCTCCGCCATGATGGCTTGATGACCGAGAAGCTCGATGGCCTG  
CTTGA CTGCCGCACGCTCGGCT

>CONTIG\_216\_length\_2084\_cov\_23.460399

GCATCGGCGAGGAACTGGAGGGCGCGCGGGCGCGTTGCCGTCGACCTTCATGTCGCTG  
GCGCCTGGCAGCCACGACCCGGACGTGTGGCACGACGTCAACCGCATGCTGACGCT  
CAACGGCGAGCAGACGCGGCGCGGCCTGGAAAACCACATCTGCCCCGCTGCAGTTCG  
ACATCGTCGACCGACTGATCCAGCGCTTCAGCAATGCCGGCGAGCTGGTGTTCGATC  
CGTTCGGAGGGCTGTTACCGTGCCGTATCGGGCGCTGAAACTGGGCCGCCAGGGC  
CGCGCCGCCGAGCTATCCACCTCTTACTTCATGGACGGGGTGAAGTACCTGCAGGGC  
GCCGAGCGCGAGATGTCCATGCCGGATCTCTTCACGACGATGGAACCGCAGCCGCA  
GGACAGGGCCGCATGAAGCCCCTGCTCTTCCCGCGCGAGCCGCGCCGGATGAAACA  
GCCGGCCAAGGATCTGCTCCGGCAGCAGCTCGCCATGGCCGCCGACCACATCGAGC  
GGGTCACCGCCGAGAACCACGCACTGCGCGCCATCTGCGCAGAAGCCATCACCACA  
TGCCAGGGCCAGGCCGAGCAGCTTCGCGCCGCGCTGGCGAAACAGGAGAAAGCAG  
CATGAACGAACATTCTGGAAATGCCGGACAGTTGCCGCCCCGATGCGGGGAGCGGTG  
GGGATGTGCTGTTGTCGTTGATTAGCCAATGGCGCGCTAACGCAGATGAAAATGAA  
CTTCATGCACTTGAAGCCGATTCAATCGGCATACCGCAGGCAACCTGCACCCACGAT  
CTGCGCATGAAGCTGCTTAGGCAGCACGCCGACCAGCTGGAAGCCGCCCTCGCCGC

CCGCCAGCCGGTGGGGGTGGAGCCGGTAGATTTTCGATTACCCGGAGTTCCGGGAGG  
AAGGGATGGGGTGTGGCCTGGAAGACCGCAACATCACAGATCGCTACGAAGCCATG  
CGCTATGGCTTCGAAGAAGCACTGGATCAGATGGCGACTATCCTCGACTCAATCGGC  
CCGCTCTACACCGCACCGCCCCGCGCCTGCTGCTGTGCCGGCGGATGGGGAGTGCGG  
CAATTGTCACGATGGCAAATCGGACATGGACCACGATTGCCGCGAGTGCGGCGGAA  
CGGGTCAGCTACCTCCTGCGCCTGCTGTGCCGGTTGATGCTTTGCGTGACCTTCTGGC  
ACGCCGAATAGCTCAGTGGCGGTTCGCATATTCCGGCGAACCCTGATGCTCCAGGAA  
CCCGTGCAATCGAAACGACGGGAGAGACCGATTACAACAACGATGTTGCTATCTGG  
CGGCAAGGTATCACCGTAATGGATGAGGCACTGGCCCTGCTCGCCACCCACCCCCA  
GCCGGCAGCGGCGTCATGGCGCCCCATTGGTGAGGCAGTGGCCGGCAAGCTGTACG  
TTGTGGGCTGGCGCGACCCCAGGGACACCGAAACCCCCGACCGCCACGAATTCGAC  
TACATGGCAGACGGCGAGTTCTGGGCAAATCATGACGACGCTGTGCAGCACGCAGA  
AGCTGTAGCGCCAGCTGGCAGCGAAATGCCACCGCAGGACGCGCCATATCAGTGGC  
TCATTGAGATCCCGGCATTGCCCAGTGCCGAGCGGCACGCCAAACCGGCCGCGGAA  
GCGTCCAGCAGTAATCAACCGGAGACGACCCGATGAGCAACACCCCGACCACCACT  
CAGCGGCTTCTCCGGCTGCGCGACGTGCTTGAGCGCGTCGGCATGTCCAAGTCCACT  
CTCTACAGTCGCATCCGGGACAAGACCTTCCCGCAGCCCCCTCCACCTGGGCACATCG  
TCGGTATGGGTGGAGTCCGAGGTGCGCCGACTGGATCAACCAGCAAATCGCCCAGCG  
GGACAAGGCGGCTTGAGCTGGGGGTATCTGTGGGGGCATCTGGCCGTAATGGGATC  
GGCCAACGCCTTTCCCTTCAACGCTTTACGGCGAATCGGAGGTAGAGCCCACCTCCA  
CCATCTGATCGCGGAAAAGAGCAGTAAGTGCTTGATTTCGCGAAGGTTAGGCCCGG  
GGTTTGATGTTCAGTTTGAGCCTGCGTTAGGTATCAAACGAGGTATCAAACCCCGTG  
CCG

>CONTIG\_217\_length\_2067\_cov\_16.769588

GTTTAATTGGCAGGCCATCCAGTCAACCTTTGGTTGAAAGCACAGTCAGTAGAGCGC  
TCAACAGCAGATCGGCGTCGCCGCCGCTGCGCGACGACGACAGCGTTAGAAGCTCA  
ATAGAGGGGGCTGCGCCCCCTCCACCGCCACTGCGCACAAGAAGTCGGGAAACCAAC  
CAGCTCGGGGCGCAGTGGCGGCGGTTCCCTCCCGCAAACAACAAGAGCGGTTCGGCA  
GGGAGTCATTAGCCGGACTTCGAGACAGGGCATGACCCTGGAAGAGCTGCCGGTTT  
CGGGTGGTCTACGTTTAAGAGCGGTCACCGTGCGCTACGCGCACACAGAGCCGGCA  
GCGATTCACTTGACCCGCAAAATGACCCCGCTGCGGCAGACCACGTAGGGGTTTCAG  
CCGACATACGTGTAGGGTGGGTCATAGACGGATGCCGCCGGATTTCAGCTAGGGCAG  
GCCTAAGCTCATCGTGAGCTTGTTGGACGGATTCAACTTTTAGAGCCAGGTGCCGTT  
ATCGCTTGCTTTCCTGAACGGGCAGAGGGTATGCTCTTGAATAGACAAGCACAAGA  
AGGCCGCTCGCCTGCCAGCGAGTAGCCTTTGAAGTCTTGTTTAGCTGGATGGTCCAG  
CGAAGCGTTGAAGCGTAGAGCGTTCCGGTCGTCTATGCAGTCTTACATAGCAGCAAG  
ATTGAGCCTAGCGGTGGTGTCTTCTGAATAACCATGCCGCCCACTATAGCCCAATTG  
CGTTACGTAGTTGTTAGCGGTTGATAACTAATTTTCGATTTAACGAAAAAAGTTGCTG  
TGGACAGCGCTCCCCGCCCTGACCGGGAAGGAGCAGTTTATGAATTGCGTCACTTGT

GCTTGGCCAAAGCCTGTACATGTCAGCCGCTACTGGCGCCATCGCTTTGGGCGGTGG  
GAATCGGTACGGATGCATTGCAGGTCTTACCCTAACCGGTAAGCGATACACAGCGG  
CGTCGGGCAACCGGCGCCGTTTTTTTTGGCTTGCACCTGACTAGGTGCACCCCTCGC  
CGCGCGTCAGCGCCGACCGTGCCAGCTCAACACCTGCGCCAATGCCTAGGCGCGG  
TGCAGCCGTGCGCGTGACGCCTCACAGAGTCCGCCGGCTGCGATCACACCACCTGCC  
GACGAACGGCATGCAATCAACTGCAAAACCCGCTTGCATGGTAAGAAGAATAATAT  
TACTATTATTCTTACCAACTAGGCCGCGAGGAGCCGACATGGACCCGTCCCAAGACG  
CACGTGATCGCATCCTCAAAGCTGCTGATGCGCTGTATGACCAAGCCGGGCGTGAG  
GTCTTCCCGACCGTCGATGCCGTGCGCAAAGCGGCCAAGGTCAACATGAACGAAGC  
AAACACCGTCATGAAAGAGTGGCGGCGGACGCAAGCGCGTCCGGCTTCGGTTGCCG  
TCCAGGTGCCCGAGCCTGTGCAGCAGGCCGCTGGCTCGGCGGTGGTGGCGATTG  
CAAGCCGCCAAGAGGCGGCCAACGACGCGCTGCGTGACGCCAGGCAGGGTGGG  
AAGCCGAGCGGCAGGAAGCGGAGGCACTGAGCCAGCAGATGGCCGACGCCTACGA  
AGCCCAGGCGCTTGAGTTGGAAGCGGCCCAAGCACGTATTGCCGAGCTGGATACGG  
CCATGCAGCAGGCTGCCTCGGCCGAGCCGCCACACGGCCGCTTTTGACCAGGTGC  
GCACCGAGCTGGTGGACCTGCAGCAGCGCGCAAGCACCGCAGAGGCCCGCGCCAGC  
GAGTTGCGCACCGAGCTGGACCGGGCGCACCTGATTGCAGCCGAGCAGCGCAACGC  
TGCCGGCCAGGCCCGCGAGGACGCAGCGAACTTACGGGGTCGGCTGGCAGCGCTTG  
AGTCGGCGGCCACCTCGCCCGCCTCGCCAAAGACCGGCCAAGCCAAGCCGCGCGGG  
CGCGGCGCCAGCTAGCATGCATGCTAGCGTGCAGCTAAGCATGCGTGCAGCTAAAG  
CAGCTTGCATGCGTGCATGCATGTTGCTAAGGTATTGCACACTTGCCCTCAAGCAAG  
CGACTTCCACCAGGAGCGCAGTGCATGAAAACCATCGCCA

>CONTIG\_218\_length\_2066\_cov\_20.154203

ATCGCACTGAGCAAGCGCCTCCTGCGGCGAGCTTGCTTCAACTGTCATGTAGTGGGC  
GACTTGACAGTCGCATTGATCTCGATGGTGTATTTTCATCTTGCTCTCCGCGCTTGAC  
GACTTGCCAAGCCTCGGAACGCAATCTATGCATCGCAGGCGCGTCGCTACAGGACG  
AAATCGCCACGATCGCTGAACATCCATTTCATCAGTCGCCCACAATACTGGCGACTAG  
ATGCACCAGGCAGTCAATGCTCTTTAGGCCCCCTGTCGCCTCGAATAGGCTTGGTGT  
CTTCGTCCAGCTCTTGGCGATCCAGCCACGCCATCTTGGATGCATGGACCGTCATCA  
GATAAGAGCGGTAGGCATTTCCGCCAATGCCTCTTCTCGCCATTTGACTGCCAAGGAA  
GCGCCAAGGCTTGATCGATGGTCAGGGTCAAGATCGTTGCGCCTTGCTGGAAAGCTT  
CTTCGATCACACTCATGTCGAGCCCCGTGATGCCCCGATGCGAGATCACACTCTTGA  
TCTTGCCAGCCGACGCGCGGATCACGATAAAGGGGATGCCCTTCCGCGTTTCGACCG  
AAGTTACCCGAGATCGGCTCTTGGATCTGCTCTCGGGCTTTGGTGACTTGGGCATAC  
CACGTCAAGAGTTCCACCTTAGCAATCGAGCGCGGCGTGCTCTTGCTGATCAGAAAC  
GGATTGCCGTGCTCACGCTTGAACCTGGTTCGAATTGGCGTCTCGGGATGCCGAGGTAG  
AACTCCGCCATGGCTTGGGTAAAGCGCGTTGTGCCCGGGGATTGATCAAGTATCTTG  
CGTAGACTGAGGAAGTCTCTTGATCGATGATGGCATTGCGCTCATCGCGCCTGGCG  
ATGACTTCAAGTGCTGCACGGAGAAATCCTTCTTGAAGCTTCCGCCTTGCCGACA

TTCGTCATACGCCCCTCTCACTTGTTTCAGGCCTTACTGCGAGAACCTTGCATCGTAGC  
TTGCCACTCATCAGCCTGACAGCCTGTGGGCGATGGCGCTTGCTCGAAAATCCTAAC  
GTATTCGTGGAGGAAGCACAGCGAAAAAGCCATCCGCCGTCGTAGCGACCCAGTGC  
ACGGCGTCTTTGCTACCTGCGGTGATTGCGAGTTGCATGTGAGCCATCACGACCAAC  
GCGTTGCTTTGTTTGACCACAAGTTCAACAAGTTCAAGCGGGAAGCCCGTTCGCAAC  
CGATGAAGCGCGTGTGCACCAGCGTGGACAAACGAGTTGAGTGCCGCCCAAGAGTA  
TTTCTTGAAC TCCAAAAAACC CGCAGTGGCTCGGCTGCCTGCGTCACCGCTTCAAG  
AGCGATCATCATCTTGGATAGCATTGGCAAACGAGCCGCTAGTGATTCACTTGTCGG  
TGTCAGCTCTTCTTGTAAGCAGGCCACCTCGGTATCGCTTGCGCAGTAAAGGACCCA  
CACGGCGCGCACCAGCGCTTCGAACTGCGCTCGATGAACGACCAAGGTGGACGGCT  
CAGAACCGACTACGAGTAGGCAGCGACTCGCAACAGCGTGCTCAATCGAAAGCAGG  
CATAGCGCGCGACAAACTTG CAGTCGATCACTTTGATCAAACGGCGGAGCCGCTGT  
AATGGGCGCCAACGCTTCCAATAGCTCATCAGAACCTTCAAAGAGCTTCTGAACCCG  
CTCAGACATCATGCTTCCCCAAGCATTGGATCAGTTGGATCGCATCTTGGCGCATCA  
ACAATCCCCTCCTTCGATGTTTGTGATGCCGTAAAAATTTTTTCAGCTGTCTCTCTT  
TCCCTTGGATCTTGCCGTAATGGCGTCAGCGGCGAAAGAGCGTGATGACCGAACTCA  
AGCGTAGCGCCATATCTTTTGCAAGATCAGGCGCACTGGTGGCCCTATGCCAACAGC  
CGATGAGAGAGAGGGGAGGGCTACGCCCACCCTCTTGCTGCAAGGCTGGTGTGCTGA  
CGCCCGCCGATCACCAGGTGGTCCAGCACCCGGATGTCGAGGAGGCCAGAGCCTG  
CTGCAGGCGCTCGGTGACCTTGCGGTTCGGCTTCGCTTGGCTCCGGATTGCCGCTTGG  
GTGATTGTGGAAAAGGATGA

>CONTIG\_219\_length\_2062\_cov\_118.726615

CCTACACCAATCCTGGCGATGTGTCGTCATGGACAATTGCATGGGCAGCGGAACGACC  
GGCGTAGCTGCGATGAACACGGCGCGCGGATTTCATCGGGATCGAGCGCGACGCCAA  
GTACTTCGAGATTGCCCCGGCAGCGTATCCACACGGCGCTTGAAGATTGGCTGATGAC  
TGCGTAAACGTGACATCATCCCGCACCCGACCGAGCTGACGCTGACAAAGACCGAG  
GACGGCATGACCTGGCTAACCGAGCTGCGCTTTATTCGAGACGGTCAAATGGAGAC  
GTTTCGTTATGACCCCGAGTATTGACAAC TGTGTAAC TAAGCTGCTAGTCTGGCCAC  
TCGCACAGAGAAACCGACATGATCCGAGAACTAGAACCCTTGCTGGTTCGGCGACTG  
CATT CAGATGCTTCGCCTGCTTAAAGACCAATCCGTAAATTGCTGCGTAACCAGCCC  
GCCATATTTTGGCCTACGGGACTATGGTCATGACGGGCAGATTGGTTTGGAGGAAAC  
ACCAGGCCAGTTCGTCGCCAAGCTAGCAGAGGTATTTCGCAGAGGTATACCGAGTCC  
TGCGCGACGACGGTACGCTATGGCTAAACCTAGGGGACAGCTGGTCAACAGGCTCT  
AAGTGGGGCGGATCGACGGGCGGAAAGGCCGCGAAGGCGCTCCATGGCTTGACAG  
GCGGCGGCCGCGACGAAACAATCGCACGGTATCCCCGACAAGCAGTTGCTAGGCATC  
CCCTGGCGCGTTGCCTTCGCGTTGCAGGATGCCGGCTGGTATTTACGGCAGGACATC  
ATTTGGGCCAAGCCCAATCCGATGCCGGAGAGCGTCACCGATCGGTGCACAAAGGC  
GCATGAATACCTGTTCTGCTGAGCAAGTCGCCGCGCTACTACTTCGACAGTACAGC  
GATAAAAGAGCCTGCAATTGGCGGGCAGACTGGTAGCGCAGCGAGCTTTAAGCGCG

AAGGCTCGAAACGCGCGCAAGTCATCCACGGGCAGTCTGCGGGTACGCATCGCGCA  
GACCGTGAGGACGTGGCTTATAACGGAGAAACCCGAAACCGTCGCAGTGTTTGGTC  
TATCCCTACGCGCGCATTTAAAGGCGCGCACTTTGCCACCTTTCCCGAGCAGCTTAT  
CGAGCCTTGCGTATTAGCGGGGGCGCCGGAGGGCGGTACTGTGCTCGATCCATTTAT  
GGGGAGTGGTACGTCAGCCGTTGTGGCTGAGCGTCTCGGCCGTAAATGGGTAGGGT  
GCGAATTGAACCGCATTTATGCCGACATGGCCCTAGATCGAATTGCAGCCGCGCGC  
ACGAACGTGTAACATCTCCGTTACGAACCACTAGGCACCCACACGATGACCTCTGCC  
GACGACGGCCTATACCTCGATTTTCGAGGGCCGCCAGCAAAACCGACCTGAAACTCCA  
CGGCCTAGCCCGCTACTTGGCCGATCCGACGACGCGGCCGTACTGCTTTACCTTCAT  
TCTGCCCCGGCATGCGGACCGCAGATTTGTGGGAGATGGGGCAGCCCATTCCGCGCC  
AGATTATCGAGCACATCGCCGCCGGACGCACATTCCGCGCGCATAACGCGGGATTT  
GACGCTTTGCTGTGGAATGAAGTGTTGCCACGGTGGGTGACGGGCTTGCCGCTGCTG  
AATCTGCGCGGGCAGGTGCAATGCACCGCAGCGCGCGCCCCGCTATAACGGGCTGCC  
CGGTTGCTGGACCGGGCCGCGGCGGCGCTCGGCCTTCCGCTGCAAAAGGATCTAG  
AGGGTAAGAAAGCGATGCTAGAGATCGCGCCTAACCCCGACTGGACACCGCAGACG  
CACCCCGAGCTGTTTGCCACTACGTACAAATACGCGTTGACCGATACCAACCTGCTG  
CCCTTGCTGGTAGCCGCCACGCAGCCGATGCCCCAGCAAGAACAACGCTGCTGGCA  
GCTTGACCTTGAGATCAACGCGCGCGGCTTTGGCTGCGACGTGGAGGCCGCACAGG  
GCATGTCGGAGATGTTTCGATCTCGCGCACAGCATCATCAACTTTGAGTTGGAGATGG  
CTAGCGACGGACAGCTGCTGACCGCGGGCGAAGGT

>CONTIG\_220\_length\_2037\_cov\_7.121990

GGCCAGTG CATGGGTGACCTCGGACTGCGCGGCCGTGGCATTGCCTTGTTCCAGCAG  
CTCGGCCGAACGGCGAGCAGTCAATAACGCATCGGCGCCGGTGGCCAGCAAGCCGC  
CCGAGCGCACCAAGGTGCTGGCCGACGCATTGCCGAGTAACACTTCCATGGACGCG  
GCACCGCTTTGACCGCGAGGAACTCGCAAAGGTCTGGCGGCTTCAGCGCCCAAGGT  
GTTCTCAACCACGGCGACACCACGGGTGACAGCGTGAGCTTCCCACCGTAACAAA  
AAGAGGAGAGGGAGAAGGAGAGAAAGGAAAGGGGTAGTTCAATGTTGCCACCTCG  
AGTCAGCGCCTGCCCTGATCCATTGAAGTGATTCAGGGTGGCGATGACGCGGGATTC  
GTTATGGGTCACCCCAACCCAACCATGCTCAACGGCGCCTAGCTTCCAAGAGCATC  
CACTTGATTTCGCATAAGTATCGGCGTAACCGCGCGCGCCCCCGAAAAAGGCCTGCG  
TTTTTACGCGCGCATCATTGGCCGTCTGGCCTAACGAAGCATTTCGTATGAAGGTCAC  
CATTGACCAATCCCACCTTCACTGTGTCTCGCAGGTGATTCACTCTGGCAGCAACGC  
GATCCAAGGCATCGGGATCACCCGCCAGCGCAGCCCTGCCATCCTTGGATTGCTCTA  
AGCGACGAAGGTTGTCGAGAAGTCCGACCTGATAGTCTCGAATTGGGCCACCGCTA  
TGGGGTGAGACGCCCATTGCCCTGAGCCAGTCCCTTGTCGTGCGGCATGAAAATTCGA  
TTTTCAGGTGCATCAATGTCGAAGCGATCCGAGTCCGACAGCACCCGCAAGATGCG  
GCTGTAACGAAGGGTTTGCTGCTCGAACCCATGATGATCCTGAAAAATAGGGCTGCT  
GCGCGGCATGCTCCCTGCTCCTTACCTGTTGCCCAGGTGCGGCTAGATGTCTGATGC  
GTCGATAAAAGAGATGCCGCTTTCACCAGCATCATCAGGAATCCCCGCGTCATGGA

CCGCGTCTTTGAAGGCCCGGTCGCAAATCACGAATGAGCTGAACGGCGTAAGGAAT  
ACGTGTGCTTGACCCACGACTTCCGGCCTAAAGGCCAAGCTGGCTCCTCCTCCCACC  
GAGTAGAACTTGCCATTGACATAGTCGTCGCTACTTCAATTTGTAGCTTCGAGACA  
ACTTCATCCAAAGCATCAAGCTCGCGAACAACGTCACACAAAAGGTGGCGCGGACC  
TTTGGCTCCGTTGGCCAAGCGGTAATCCACCTCCGCGAAGGCAAAGGCGTCGGAAT  
CCACCGAAACCATGACATCGTGGAGTCGCTCGGAAACCAACCAATAACCACTAAAT  
CCCGGCTCTAGATCGCGTGGGGCTGGACCTGTGTTGGGGTCGTAGGTCAGCTGCGGT  
GTTTCGCGGAGCACGGGAAATCCTCCCTCCTCCGGCCGCAGGATCAACCGCGGAGG  
GGACAGCAAGTGCCGGACGTTATCGAACCTCACCCACAGGGCTGCCTGTTGCTCTC  
CATGTCCGCTTCAAACATGTAGAAGCTCCCGGCCGTCGGCTGATTGGGTGTTGTTGA  
TGGCATGCGTTTCGTCCCGTCCGTGCGCTGGGGTCTCAGCTGACAGAAAGAGCTTAA  
CTCGGCGGCTTTGCCGACCCAAGCCATAAGACAACGGAGGGGCTACGCCACCCCC  
TTTCCGCCAGGCTAACGTTCTTCTGGCCGCCGATGACCAAGTGGTCCAACAGTCGGA  
TGTCAGCAGGCCCAAGGCTTGCTCCAAGCGCTTCGTGACTTTGCGGTCCGCTTCGC  
TCGGCTCCGATTCCCGCTCGGGTGATTGTGAAAGAGGATGACAGCGGCGGGCGTTG  
AGTTCCAGGGCACGCTTGCGGACGACCCGGCTATGGACTTCGCAGCCGTCGACGGT  
GCCGGTGAACAAGTGCTCGGTAGAAATGATGTGGTGCTGGTTGTCCAGGAAGACGA  
CCCCGAAGACTTCGTGCGGCAGGTGAGCGCAGCGGGCAACCAAGTAATCGCCGGCT  
TGGTC

>CONTIG\_221\_length\_2029\_cov\_12.411672

CTACCGGTCGGCCTGCTTGCCAACGCCAACAAGCTGCACTACATCGAACCCGATCAC  
CTGGGCAGCCCGCGTGTGGTGGTTGACCCGGCTCGTAACGTGGCGGTGTGGAAGTG  
GAGCCTAAAGGGCGAGGCCTTCGGGAACACTGCGCCGAATCAGGATCCGGATGGCG  
ATGGTGCGGCGCTGGTGTGGATATGCGCTTTCCGGGGCAGCGGTTTGATGCGGCTA  
GCGGGTTGAATCAAAATTACTTCAGGGACTACGACTCTGCTACCGGGCGGTATGGGC  
AGAGTGATCCGATTGGGCTCGATGGGGGGATTGCCACGTATGCCTATGTTGGCGGTA  
ACCCAGTTGGATCAATTGATCCACTGGGGTTAGTTAAATGGAGTGGAACCATGACCA  
GTGGCAGTGCTGCATCTGGAATTGGAGGTGGCTTCTACAGGCTCTCCCTGAATTCGG  
AGTGCGTAAATGGCGAGCAAGGGCGTGCGGAAGTTGTTGCGATAGGCCCAACGATT  
GGTGTGGAGATAAAAGGCGTGCCGCCTTTCAGCCTCACAAACATCAACCGTCACCCTT  
CAAGACAGACTGAATTACGTTAATCCCAACGTTTTGAATGGATGGTTTTCAATGTGG  
AGCGCTGGCATCACCGCATTTGGCGGCTATGGATTTTCAATGATCCAGGTCGGCGGT  
GATGGGGGGGCACTGAGTCCTCCTGAGAGGTCGGGTGCTTACAACCTTCTTAGAGAA  
AGGCCCCGAGTCGTGGCTTTGAAATAGGCGCTGGCGGTGTTGCTGGCTCAGCCACAGT  
TGTAGATTCATCCGTTTCCAAATGTGGCTGCAAGTGATGAGGATCAAGATGATCGCC  
AGGATTTTTTTTTCGGCAAGTGCGATGGCATTTCATTCTTATGGTGTGTTTCCTTG  
TCGTTCTCGTGACATTTGATCTCAATAATGCGGATAAAGTTTGGACCGGAATTTATC  
CAGCAATAGCTTGGCTACTTGCTTTATTGATTTGCTGCAAATTCATGCGTGAATCAA  
AGGCGGCATCCCCCAATCTGAATAGCGGTCGGGCTTAGAGGTTGTGGTTTGTGATA

TCGGTGTGGTTCAGCTGTTTGGCATACTAGATGGCGTCGTGCCGCCAATTGCTGAA  
CCGCCCTGGGAATTCCGGAGGTTCCATTTCTTGAGAAGATGGAGCCATGAGCAGAG  
CAAGAAAGTTCTTCCCGGAAATCCGGGAGCGTTCGGTGAAGACGGTGCTGGAGCAC  
CAAGGCGAGTGCGAGTCGCAATGGGCGGCGATGGAGTCCGTGTCGGTTAAGGTGGG  
CTGCACGGCCGAGAGGGAACGCATCAAGGCGCTTTAGCGCAAGGTGTGGCCTAATT  
TGGTCGCAGATGATGCCCTTCGTTTCGATTGCTTGCAGCCATTTAGGGTGACGCCTTC  
GCTGAGGTCATCAAGCTCTCAGAGCGTTGCTTTTCAAGGAAACGACTGACGTTGTCT  
GATTCATCAAGGCCGACAGGGAATCGAGGCTGAGGCCGTAATCAAGCACGGACAGG  
CCCGGCGAGACAGCCCGGAGCCCGTCCAGCTTCTCCTTGGCGGTGAAGGCCCGGCT  
GTAAGTGACGTGGTGCTCGTCGTCCAATTCGTGGCCGACCAACTGAGCCCGGAGCTT  
GGACACCACGCCGGCGCCCTGCAACTCCTGGATGAGTGTTTTGCGCAGCGAGTGGA  
AGCCCCTCTTGGCCGTGGGCCAGTTCTTGCCACCTCGGCCAGGTGCCGGCTGAAGG  
CTTTGGAAATCCATTTGCCCTGGCCGTTCTTGGCATCGGCCTTGGCTGCTGGGAACA  
AGCGCTCCTGGCCCTCGGCGCGCGCCTGCTCGACCCAGCTCAGGAAGCACAGGGCG  
AGCAGGTCGGGGTGGACCGGCACCGTCCTCAAGCTCACGTCCGTCTTCACCTTCTGA  
TGCTCGCCTTCGTCCGAAATCTGGATGTAGGGGATACCGCCGTCTCCACCACATCG  
GCGGTCAGCAGTTGGCCGACCTCCGACGCGCGGGCGCCGGTATAC

>CONTIG\_222\_length\_2021\_cov\_53.126188

CGCTTCGGCTTCGCGCAGGAAGCCAATGATCTGTTCTCGGTAAAGCGCTTCTTCAC  
GTCCAATCTCCTCGGGGTAGGGAATTGGACTCCAAACTGGGGCGCTACTCAAATTTG  
GGTGGACGTCGCCAGCGCCTCAGCGAATATCGTCTCGAAGTCCAGCGATTTCGATCA  
AATCCGGCGCTTTTAGCTTAGAGAGGTCAACTGCAGTGAAAGAAGCCATGGATGTG  
CCAATTCGGGACCATGTTAGGTTCACTTGCAGGAAAGAAATCCGATAGAGCTGG  
ATAGTAAAAATCCATACTACAAAATATGACTGGGTGGACCGTGGATTTCTTCCGGAT  
GGCTACTGTGGAATTAAATATTCTTAATATCAATAAAATTCTGGCTAGACTTCTTAA  
ATGTAATTTTATGCTCCCGTTCTGGATGGCGTGAAATAATAATTTGTATTACCTAATT  
CGAACTCTGGTTTTAATTTTAGTGACTTCGTGCACGGTTTGTTTCGTAATTGTTGGAGC  
CTAATTCTTCTGCGACTGCCGCTGTAGCGGTTCTTGCATAAAAAATAATCATTCTCT  
AAATCGGGGTTTTATGAAAATTCGAGAAACGTCTCGCGTTAAATTTAGCGTGGAAG  
ATTGGCTGCGGGGCTTGTTTTGATTGCTTCAATTGCAGGGGCTGGCTTTGCTTCTGCT  
GCTGAGCGAAATCTTGGGGCTAGACCTGCAGGTGTCCCCGCTGACTACGTGATAACT  
CCGTTTCGGCTATTTCTCGCCTGCCTGCATTCAGCAGATTCATAGTGGGGATCAGATC  
ACGCAAGATGGAGGAATTCAGCGTGTACAGGTTCTTAGAGCAGCGGAAGATCTG  
TAGCCAGGACAACCTTCACGCGGGATGGTGTTTCGCGTTAAGCCTGATGGACGAACTTT  
GGAAGGCAAGCTAGCTCGAACAATTGACGGGAATTCAGTAGCGCAAACCAAAGCAG  
TCCTCCCCCTAAAATTGCACATGATTATCTTGCCGATGGAAGCTATATCACGTCTCA  
ACCGATCGGTAGAATTGTCGCTAGTTGGAAGGTCCCGCCAAATCCAAGAGTTCGATC  
CAATCAGACAATCTATTTCTTCCCGGGAATGCAGGGTGACACAATTCTGCAGCCAGT  
ATTAGGTTATCGAGGAGAATCCAATACCTGGGATCTCAGTAGCTGGAATTGCTGCAA

AGACGGCACTGTGTGGACCAGTGATTATATACCTGCAAAGTCTGGTGATCAGATTGT  
TGGTGATACGTACTCTACCTGTGCGGCTGGCGTGGCCTGTACTCGCTGGAATATTGA  
TACGAAAAATATCACCTCGGGACGCAGTGTACGACTAACAACTGCTCCTTATGGGA  
ACCCAAATTGGATTTTTCGGTGGGGCGCTCGAAGTATACGATGTTGCTAGTTGCGATG  
AATTTCCGGACGGTGAATTCTTACGTTTAGCGGTATCGCCGTCTATGATCGAAATA  
TGATTCGCGTTTTCGTCCCCGCCATGGGATAGCAATGGGCCGGATGCTGCGGGGCTCA  
GTCCGCAATGCAATTATGGCGTTAAGACAACCGATACTTCAGTTACTGTTTTTTACTG  
AGTATTAGTATCAAATAATATTGTGGAGCATTGGCTCCGTAAGATGGACTTATAGTG  
GCACCGATGGGGAGCCCATGTAAGGCTCCCCATCGGATCGTTCAGGTCAATGAAAA  
TGCTTTTTTGAGTGCTGTTTTACAAGGCGATCTGAACTATAGGAGTTGCGTTTTAATA  
ACTGCAAATCAGGGCGGGCATTGTCACAATAGATTGATTATGAATTCATAGAATAG  
AATTACCTGTCTACACAAATCCACTCGCCAGTGACATTAAATTTGCCTGACCGCATC  
CAATCTGCACTCGTCCTTCCAAGGCGTACTGACTTTGTTTGTGGATAGCCGCTCTTGC  
ACCTGGCATATCCATACTTCCATTGGTTGCTCCAAATCTCAGATCTGGATGGGCCAT  
CGACATTGTATGACGTCATCTCGCT

>CONTIG\_223\_length\_2006\_cov\_22.278872

CGGCACGTTGAAGTCCAGCCGCTGCGGCTTGGCCGGCCGGCGTGTTGCTTGCGGCC  
ATCAGCCCAGCAATTACGCCACCACGCACACCCGGATTACTCAGTGCGGCCGCACC  
AGCTCCTGTGCTGTTGGCGGCAGCGGCGCTGCCGGCGCCGTGGATCTGCCCAGCGGC  
GGTGATGGTCTTGGCTGCACTGGCCGCGCCCATGCGGCCAGCGCGGGCGGCACCCA  
CGCCTGCGCCGATCGCAGCAGCGCCGGCACCGATGGCGACGCCAGCCGCGCTACCG  
GCGGTCAGCGATGGTGAGCCTGATAGCAGGCCTCCGGCCACAGCGGGGGCGTGTAC  
GGCTAGGATCGCCATCACTCCAGCGGATACAGCGGCGAGATAGGTAACCAGTATCT  
CGGGGGCCCGCGGCACAGTGAATGTCGCCATTACGTTGCCGTAAACCGCCATGATG  
AAGCTCAACACCATGAGCTTGACACCCTGCGCTATGACAGCGCCGATCGCTTTTTCA  
GCAAGGAAGGCCGTGTGATTGCTTATCCCCAGGGAACCAGAATTAGCCCTAAGAC  
CGACACTAGATAAACTCGATGACGGTCAGCATGCACGTGACCGCCAACACTGCGA  
ATGCAGCCAGGATAAACAGCTCCGCAACCGTGTACTGGACAACCACTGCGAGCATC  
GCAACTTTGTCCATCCACCCGCCGCGCTGCATGTCCTGGATCTGATCGTCAATTGGC  
TTGATGACCTCCATTGCTCTATCTAGGATTGCGCTCGGGTCTTTAACTAATGTCGCG  
TTCCACCGCCAGCCAGCGTTCCGATCTGTGCGAGTCCGGTGGCTACTCCATTGGTCA  
AGGTAGGCCATGATGCGACCAGGAATGCAAAGAAGCCGATGCGCAGTAGCTTGCGG  
AGGAATGGCGCAGTGAAGTCTTACCACGCAGCGCCCAAAAAGCGCCGCTAGTGC  
TACTTCGATCGCTGCGAGCGTGCCAGTATTGCGGACGCACGTGGCGTCAGAATTCC  
GAACCCGTTGGAGAAGACATTGACGAAATTATTGAGTAACGCGGTAGGAATCCGG  
TGGTGGTCGGGTTCATAGCGGCCTACCTTTGGTAGTTAGAAGCTCGTTTTAGCCGGA  
GGCACGGTGGACTTCGCCGGGGAGCCGCGTTGATCGCCGCAATTCCCATAGGCGCG  
GCATGTTTTTCAGCTTGATCCGTGCATCATCGCCAGCGCCACTGCCATACGCGCTGTC  
GATCTTGCTCGCGCAGCTTTGGTCGAACGTGACAACCTGTTTGCATTGTCAGGTAG

ACCCAACCTTGTCAAAGATCGGGATCACTGCATCGCCGGGAATAGTCCCGTTAGCTGA  
TCTGTTGTCGGGAACCGACGTGGCACGTTGCGCGCAACCTGCGAGGGCTGCGGCGA  
CGGCAAGAACTACAAGGCGGATGGTCTTTTTCACTTTAGGAACTCGATGTTGGCCGG  
TGCGACCGTGGATTTGTCGTAGGCGCTGCTGCCGTATGCTCTGTTGACCTTGATGTTG  
TTGGCCTGGTCGGATGCCAGTTGCCGGGCTTGTTCTCTAGGACTGCCTGGTTCATG  
GCAGCTGTTTGTGCGTTGAGCTTCATCATTTCCTGACCGACCAGCATGTTGATCTGGT  
TGCCGGCCTGCGTTGCCGCGAGTGACCTGTGCGCGACTGCGAGGCCTGGCCCATCG  
TCTCGAACTGCTGGTTGGTGCTGTCCAGCGTGTCCAGGACGGCGGGCGCCGCTGTAAA  
GGGCGTCCCTCGACGTTCTCGCGGCCCTGCGACTGCCACTGATCGACCATCGCGGAAA  
GCTGCTGAAAGGTCGCGTCATTGGTCACTTGGGGATAGCGCTGGGAGAACATGTCG  
CGCGTGTCTTTCAGCTTCGCCATGCTCCCGCGCAGCTGGTTGATGCTCTGCTTATAGG  
AGTTGTAAACCTGCTGGTACTCGCCGAACACATTGCGCGGCAGCGAGGCCAGATTG  
CGGCCCTCGTTGGCAACCTGCTGG

>CONTIG\_224\_length\_1987\_cov\_35.642473

CAAAAATTGACACCCTAAATCGGCTAGAATTGGCGCGTATCGAACAGTTTTTCCAGC  
GCATGCCACTGGCGCGGTTGAAGGTTTTAACCGCCGACGTGAGAGCCAAACTCCCC  
CGCAAAAGGCGAGGTTAGCGGCATGTCTGTGACACGAAAGAAGCTCATCAGAGGGC  
TATCACTCGGCCTAGGCCTAGCAGTGATTGCCTCCGCACTTGGATGGGCAAGTGCGC  
GCGGTCTGGCCTCGCTAGGTTTTACCGTGATTGCTAACCTCTCGCCGAGCGTGCGC  
AAGGTCTGTACCTCCTGAATCGCAATACGCACAGCGCAGAGCGGGGCCAGCTGGTC  
GCATTCCCCCACCATAATGCGGCAGCGCGTTATGGCTTTGAACGCGGCTGGATGAAG  
CCCGGAAGTCTTTACATCAAGCGTGTCGGTGCGGTTGCCGGCGACACGGTGTGCGTG  
AACACTGAAATTAGCATTGCAACCCCAACAACCGCAGGGCACCCAGCGACCTATCG  
GCGTGTGGGCGCGGTCGCTGCCATGGACCGAACAGGCGTGGCATTGCCTCACGTCTT  
ACACGGCTGCACGCGGGTTCCAGTGGGGCACATCTTCACCATCGGTGATGGTCTCGC  
CAACAGCTATGACGGCCGCTATTACGGGTTCTGTGCCGTGTGCGTAATCGCCGGAAG  
CATCACACCGTTGTGGACGCAAGCGTCTTCGGTAGGAGTCGATCATGAGTGACCTGA  
TGTCAGTGATTCTCGCTTGCTCCATCGGCGTGCATCCGCAAACCGTGCAGGCGATCA  
TCAAGCATGAGAGTGGCGGCAATCCGTATGCCATCAACAACCAGGTCCGTAGCTTCT  
ACCCGACCCGGCTTGACGATGCCAGCGGATCGCAGTCGAACAGGTGCGGGCCGGT  
CGCAGTACCGATATCGGGCTGATGCAGATCAACTCGCAGCATCTGACCAAGTTCGG  
AGTGACGCCCGGTTGACCTACTAGACCCATGCACAAACATCCGCATTGGCACCAACCAT  
TTTGGCCCGGAACTACGCCAGACATGGGCCAAATATCGCGCCGAAAAGCCTGCGC  
TGCTGGGCGCCTTGTCGATGTACAACACCGGCAACGAGTCGCGCGGATTGAGCAAT  
GGTTACGTGAGCTGGGTGTGCAAGCGGCTGGGGTGGCGGTGAACTTCCCGGCAAG  
CGGGAAGGCGAGCGGCCGCGGTCCACCAAAGCCCAAGCCAATGCTGTTCCCGTAA  
TGTCGCCCGCAGCCGCGCCACAGGGTTCGAGGGACCGGGCCGAAGGCTGCACGA  
CCGAGGCCACGCTGACCGCTTGTGCGGCGTTGTGCGGGTAGCGTCCGATAGGGTGG  
GGCTTGGTCGAGGCCGACGGTTCGAGACGCGCTACAGCAGAGCCAGAGCGGGCAC

TGTGGTTTCTGCGAAGGGTGGGTTTGATCGGAGGGGGTGAGGCCGTCGGAAGGCAA  
AGGCGGAGAAGCGGAAAAGAAGGGCAAGATAAAAGTGTGTGTGGTATGGGGGTTC  
TAACTGACTATTTTTATTAGCTTTTTATTACAACATTGTCATTTAACCTTGTTGTAATT  
TACAACGTAGTTTTTTTAGGGCTGGGAGACGACCATGGTCGGCAGTGAAAAGCGCA  
GCTCAGCAGGGCCAGACCAGGACGCTGGGAAGGGCAGTCAGGGTGCAAGCAGCAC  
CGACAAGCCGCTGCGCGTTTCGCCTGTCCAAGGGCCGCCAGGCGCGTAACAACCTCCC  
AGGTCAATGAAGTCATCAGCCGTGTCAAAAGCGCTGCCAAGCGGGCGGCACGGACC  
GGGCGCATTTCCGGCGCGACCACGCACCATGCTGGGCGCGGCGCTGGCGTCAGGAT  
CAACACCGGAAGCCGACAGCAGCGCTCACCATCAAGGCCCGTGTGGTTGCAGCAC  
CACGGGTCGGAGCAAAAGCCGCCATGCAGCGGCACGTGGACTATGCGCAACGCCAC  
GGCGTAGACAAGGA

>CONTIG\_225\_length\_1978\_cov\_29.145867

ATGGTGGTCTTGCCACGCCGCGGGTGCCAGTGAACAGAAACGCGTGGTGCACGCG  
CCCACTGTCGAGCGCGTTACTGAGCGCGCGGACCACATGTTCTGGCCAACGAGTTC  
GGAAAAACGCTTCGGGCGCCACTTGCGGGCGAGAACAAGATAAGACATCGGGCAA  
CCAGCTTCCTCTGAACCGATATTGTGCCATGGCGCGCCAGATTGATCGTTCAGCAGT  
GGTACCCGGCCGTCCCGCTGACCGAGGTGCCCCGGCAAGCGTGTGTTGCTTAACCTGA  
GGACCTGCAAAGGCGGCATGCTCCCGACCGCAGAGATCGTTCGCCTTGTTAACCGC  
GCCCCGCGGCGGCTAGAATCCCGCTCCTGCCGCAGACCCAGTCGCGCGGCAGGTACG  
GAGAGGTGTCCGAGTGGTTGAAGGAGCACGCCTGGAAAGTGTGTAAGCGTCTAAAC  
CGCGCTTCGGGGGTTCGAATCCCCCTCTCTCCGCCAGATTACGCAAACCCCTGTTTTT  
ACAGGGGTCTTTGCAATCTGACAAGATCATAAACGGGGCACAAATCGGGACACATC  
CCGATGAGAATTCCCCATCATTGATTGCTCCGCCTCTGGCCGATGGTCTTTCCGCC  
AGAGAGTGCCCCTTGACCTCCAAGCCAGGCTTGGGAGACGGGTCATCAAGCGAACG  
CTTCGAACCACCGAACTGCGACAAGCGCAGATCCAAGCCATCAGGCTTGCGTCAAG  
CTATGCTCAGGTCTTCAACGCAGTTCGGGGACTGTTGATGGACCGGATGAGCACCAA  
GGATGTGGATGCGCTCGTTGAGCGCTTGAACCGTGACGAGAGCCGGAAGGATCTGA  
CGCTCCATCGCACTCAGGCACCAGATGGGACGGTGACGGAGCAGTGGCAAATCGAT  
AATGAGGACGATGTGCGGCTCTACCGTAAGGCTCAGGGCTGGACGGCGTCGTCTGA  
GGTTGCCTCGATTGGCATGCTGCCACCTGAGCTGATTGAGCAAAGAAAGCCTGCTGT  
CGCTTCTGTGATGAAATTATTACGATGGAAAAGGCTCGGGACGGATGGTTGGCGA  
CTTTGAAGGCCACGACGCTTCCGAAGACCTACACCATCAAGAAAACGGCGATTGAC  
TTCCTTGTCAAATTTTTGGGACCCAAGACCAAGATTGCCACCATCAAGCGTCCAGAT  
TTGGCCAGGTGGTATCAGCACATGCGGGAGGGTGGATCATCGACGCCAACCCTTGT  
GAACAAGCAGTCTTATATTGGTGGAAAAGGTGGCTTCTTCGATTGGGCCATGAACTC  
AGGCTTCTATCCGAAAGGCGACAACATCGCCTCAGGGCATGTCGCTTTTCCAGCTCG  
TGAAAAACGTGCTAGGCGGAAGCATGGCTTCAAGGCTTACGACAAGCATCAGATCC  
AAGCATTGTTTGATCCTAGCAACTTTGAAAAATTGTCACCGAGTGCCGTTGGGCAT  
CATTGATCGGCTTGTATACGGGAGCAAGAGCTTCGGAAGTTGGACAACCTTCTCTAA

ACGATGTCTTCAAAGATGGCGATATCGTTTGCATCAAGATTAATGACGAAGGCGAAT  
TTCAGAAGGTCAAAACGGATGTGAGCCTTCGCACCGTTCCTATCCATCCTGATCTGC  
TGGCGTTGGGATTTTGGGAGTGGACGGAAGAGCTTCGGGCAAAATGCCACGACCGG  
CTTTTCCCACAAGCCAAAGCCAATGCGACGAACGGTGCGGGCAACTGGATCAGTAA  
GGCGTTCAGTCGTCATGTTGCAGAGGTCGGGAAGAGCTGGCCCAAGGCAAAACGCG  
GCTTCCATTCTCTGCGCAAGACCTTGATCCAAGAGATGCAGGGCGCTGGCATGCCCT  
CTGAACTGAGGGCTCAAATCGTTGGACATGAACTCGATGATGAGCATCACGCGACTT  
ACAGCAGAGAGTTACCAATGCGGAGAAGCTCCAAGGCATGGGCCACCACTCCCCT  
G

>CONTIG\_226\_length\_1974\_cov\_14.818625

TATCAAACGTCTACCTCCTCATAATTGGATCGTAGATGCACTTTAAACACTCCCAAC  
TTCATCAATATTTGCAACAGCCCAAAGGTCAGTTATCCATCCGAAGCATTTCGCATCG  
GCAAAGTCGAATTCAGCGACATGGTCGTTCAAGACCGCGCTGGCGCGCTTCACCTTC  
AGGACCTGGTCCAAGCGACTTATGACCATCATGAAAAGCTGCGACGGCTTCGCCGA  
TCCGGAACGCGCTATCCTGAGCCCCTGCCCCTTGCCACTCCGGCGCGGCTCCTTTCT  
GAAGAGGTGCGACGACTTCCTCAAAGACAAGGAGCGGCAGAACCTTCGCACCACCAC  
GATCGAGGCCTATCGTCGAACGCTTGCCATCTTGCAGCGTGTGAGTGGCAACACGTC  
CGTTGCTCGGATCGACCACACGCACATCTACCAGATGTGGGATCTGCTGCGATGGGC  
GCCCCAAGACTTCATGACCAACCCCAAGCATCGGGGATCAAGCGTCGAAGTCTTGA  
TTGCGAAGGGCCAACGCCAAGGGCGGGCGCAGCCTGCCAACGCAACACTCGAATTG  
CATCGGCGCTTCTTGCGTCCTTCTTCAACACCTTAGTCAAAGCGCGTGCCATCCCA  
CACTCCCCAATGGATGCGTTCAAGCCGGCCAAGGAAGAACTCCTGACTGATCAGGA  
CGAGCCCGAGCGTCTGCTCTCACCAGAAGAAATCCAGAAGATCTTCAACCCGGAGA  
CCTTCCTGCCTTGGGCGAAAAAGTATCCCCATCGTTGGTGGTGCCCACTGATCGCCC  
TTTTTACGGGCGCTCGGATCAATGAGATCGCCCAACTCAAAGTGGCCGACATCGTGC  
AAGATCAAGGTGTATGGTGCTTACAATCCAGAAGACCGTGGATGAGGACTTGGCG  
CAAAGCGCAGGCAAACGCAGCCGGCAAAGCCTCAAAGGTAAGAGCGCAATCCGCA  
AGGTGCCGATCCACCCAAGCCTCATCCAGGCGGGCTTCCTCGACTTCTTGGCCGACA  
TCAAAGCGTCTGGTCACCCGCGCCTCTTCCCCAACTTGTCGGCTGGCACCTGTCGCC  
AGACGGGTGAGCCGAATGGGCGTTACAGCCAGGGCTTTGTGAACCAGTTTGCGGCC  
TACTTGAAGGGATTAGGTTTCGGCAAGGGGATTGGGTGCGATGCCTTCCGGCATAACC  
CTGGCTACCGAGCTCGATGCCAAGGGCGTGCGGGTTGAGCACATTGCCCTCATCACT  
GGCCATGCCCTCAACAAGAAGGCGCCTGTGCTCCAAGACAACCTATGTCCACAAGTC  
GGCCGGGAACATCCGGAAGATCCAAGTTGAAGCGCTTGGTCACTATCAGCCGGCTC  
TGACGCTGCCGAGCTATGTGCGCGGGCAGTTCAAGGAGCGGTTGAGGAAGGGGGCG  
AAGATGTATCCGTGAAGCCAAAGGCAAACATATGTCTGCAACTTATATGAACACTCT  
GCGGAAGTCTTTTGGGAATTCCGGCCAATATAAATAACTTGTTAAAAAGCCTAAAAAA  
TTAGTTCACACTAAACCGGACGATGGGTGATATCTCGTAAACACCCAGCTCCACATG  
AAATTTGTTAATATCGACAATTAAAACGTTGCGCTATCTCGAACAGCGCAGTATGAT

GACTGCACCTGGTTACCTATTTTTTTGAAAATGGCTGTCGGACTACATAAAAAAGAAA  
TTAGCGGCCGAGCTTCTCTCCGCGCTGCAACATGCGAGCTATCGCCTTCACTTCCAC  
CCGTCGGGTCACGTGTAACGCTTAGTTACCCTGGAAAGATGGAAGAGTCTGCCATTC  
TGGAAAAAAGAAGGTCGGACTTTCATAAGCTCGGGGTAAAGGCTTAAAAAGCAGC  
TCATCAATTGAATTAAATAGTTTCGTCTGGTCAGACAACCTGGCTTGCAATGCATCGC  
CTTATATCGGAAAAAAGAAGGCCAAGTTAATTTACTTGGATCCTCCCTA

>CONTIG\_227\_length\_1949\_cov\_7.866081

CAGCGGTCACCAGTAGTGAAGACATCCAACACGCACGGGAGCAGGTGCAAGCTTAC  
GCCCAGGCGTCTCCCGTGCTGAGCTTGGCCAACGACAGATCGAACTTCGTTTCGCT  
CAGGAGCGCGATGCTTTCGAGCAGGCGTTGCGCGAGGCCAATCGGCAGGGTGTTTC  
CACGCAAGAAGCGCAACAGGTCGCAAGCTTCGCCGCAACGACGGTCACCGCTCCGC  
ATGTGGACGAAACCCGAGCGCCTCAGGCAGCCATTGATGCGCAGAGGGATCGAGAC  
GTTGCACGCAGACTCGACGCGCCTGCTGTTGCGGAGACGGCAACGCCTGCCTCGGT  
GTGATGCCTACAGCCGTAAACGCGCCGCTGCCAGAAGACGTGCGCCCGGTGCCAA  
GCCTGCGGAACCGAAGCCCGAGTCTGTCCCGCAACGCGAACCCCAAGAAACCCGAA  
CACCTGAGGTTGCCGCACCCCGACAGCCGGCGCAGTCCAGCCTAAGGCGGAGGCA  
TCGGTTCCAACGGCGGCAAGCGCATCTGCGCCGAGCGCTGGATCGGCATCATCCGCT  
TCGACCTCTGCCGATCAAGCGGCTACTCAGGCCACTGTGCCGACGCAGCCGCCGTCA  
TTTCAGGAAGTGGAAGGGCTGCGCCTGGGCGACCGAGGGCAAGAGGTCGAGTTCTT  
GCAGTATCGATTGCAGCAAGTAGATGCCCCTGGTCCAAACGGTCAGGCCGTGCCGC  
AGGACGGGCACTATGGTCCGGAGACCGAACATGCGGTAAGGCAGTTCCAACAAGAC  
CAAGGATTGCCGGCAACGGGGGTTGCCGGCCAGACCTGGATGAAGCGCTGTCCCA  
GGCACAACACGCGCGCCGAGATGCCTTGAAACCCATAGAGCCATCATCGGCCAATG  
CAGCGATGGAGCAGGGCGGTGAGCAGCAAGCCCGAGTAGGCACGCGACAGAACGA  
TGCGCCATCGGCTGTTCCATTGCAGGCAGAGCAGCAAGAGGCGGTGCAGGCCTCGT  
CGCCGGCAATTCCAACGCAGAGCGAAGTGCCGGCACAGATCGTCTTGCCTGAGCGC  
ACGTCCTCCTATGCGTCATCGCCAGGTTTTGGTGGGACAACCTGCCCCTCTAACGCA  
CACGAACACGATGAGGATCGGGTCGAGCAAGCAAGGCCCTTCGAAGATGCCGCTCA  
GCAGGCGTTTCCCTCTGATCATCGGGATTACGCGTTGTTCTCCGCCATCCAGGCGCA  
GCTCCCGAAAGGCACCTCCGATGAGAAGACGGCCGAGGTATTGCATGCCGTCAAAG  
AGTCAGGGATCGAACGCGCGGATGAACTCCGGAAGTGACCATCCAAGATGATGTC  
GCCTTTGTCTTTGGCAAAACGCCGGGCTTTCACCTCGGAAACCTCGCTCAACACGCCA  
TCGCCCCGCATCAATGAGACCTTGAGAAAGACAGAGGCAATGGATCAACAACGGGC  
GCAAGAGATGGTGCAATTCCAGCGCGAGCGCGAAGAAATCGACAAGAACCCAACA  
GGCCCCGTGATGACGCTTGCTGCCCATTCTCAGCAGCAGGCGATGTCTGGCGGCGAT  
GGAGGCGGTGGTGGTGGTGGTGGGGGCGGTTGAGGCAAAGATTGCCTTCGTCGCAGGAT  
TGCCGAGTTTGCAAGCAGAATGCCCTGACCTTTCTTTATGTCCTAAGAGATATATGA  
GAGCTAAGAAGAGAGTCGTTGGACGCGATGCGAACGGACAGTCGCGGGCTTATGAA  
TTGGCTTTGTACAGTTTTTCATTAATATTTAAATATGCTCATTTCGGTATATCGATATA

GGGCTCGCGAAATCGGAATTGCGTGGCGCGGACAGCTTATTTCAAACAACAAGCAA  
GAGCGCACTTATGGTTTCTGCTTTGCAGAAACCGTGCGCCAACGCTGCGCGTCGGTG  
CGGTGGCTTTCGCCACCTCGTTGCCTATGCTTCGC

>CONTIG\_228\_length\_1929\_cov\_10.982242

ACGATGTTCCGGAGAAGGAGATTGCCTTGGTGACCGGCCACAGCACCGATCCCCGC  
GAACGGGTCCAAGTGCTACGCAGGCACTACCTCCACAAGAAGCCGCAGGTGACGCG  
CAGCAAGCAGATCAGCGCTTTGGAGCTGTATCAGCCCAATGTGGAAGTGCCTCGCTA  
TGAGCGAGGGCAGTTTGCTACGTGCTTGGCTGATCCGAGCAAGTTTTACCCGTAACG  
CACGGCAACTAACCAATGAACCACTCGACCAATCCGGGCGCATGTATGCCCGGCCA  
AAAATTCTCAGGCTTTTCCACCATGAGCCTCACCACATGCCTACCACCGACCTACCC  
TCCTCCCCAGTCGAAACCAACCTAGCAAAGCAGCAATACGCTAGCGGAGCGATCTA  
AATGGCATCTATGTATGGCGATTGCACGATTCCGGGCGCGCGTGTAGTTCATTCTACT  
CATAAAAAAGCTCACCATGCAGGCCAATCATCAGATCACCATCGATTTCCGGAGAAA  
GGAATCTCAACAATGTCATCGGGGTGCCGAGGAAGGGCACGACCCTCATGCGGGGC  
ATTTTTGGTGTGCCCCCTTTACTTTTACCCCATCTTCTTTGATGTGGGGGAGAACAACA  
ATTCGTCCGTGATTCTGCGAAATAATCGTTCCCTTCTCGCCACAAAGCTTCTCCGTCTG  
AGCTTCCCTTCGCTGACCCAAGCTCCTTCACTAGCCAGCCAACGTTCTTATGAGTTTC  
ATACCAGAAAACATAACATCCGTAGACAAGGACCTTTTCACCTTTAGCTAGCGCTTC  
TGCAAGAAGGCGCTTTATTCCGGCCAGCTTAAGCAGCTCGTTAGCTCTGGGGAGAAG  
AATCTGCCGGATAGCCGCTTTTGTCTTACCCCAATGAGATGAGCCATAAAGGTCAAA  
GCCATTGGCTATTTTTGCCCCGATGGCATGATAGCAACCCTTTTCTATTGGGATACCGG  
GGCGAAGACCATGAACCATTCTCCAAGCGGAAAAACACAATTGGACGCCCTTCCGA  
CCTGATAAGAAGTAGCTGCAAGTATGGGAAGTGCCTCAGCTCATCTGCGATTAGCTC  
TCTATAATCCTCACTACTCTTATGGAGTATTAGCTTGCTTTCGTCAAAAATAACGCC  
TTCTTCCGCGCGCGCGCCTGCACAAGCATTGCCCCGCTCTTCTTGAGCTAATCTCTTG  
TGGCCTGGAGACTTTTTTCGGCCTTTAATCGAAGTGAAATCCGCTGTGACTGGCTTG  
GCTCCTGTTTCGATTCTGAAGACTTGCTTCAGCGTTGATCACAGCGCATCGCTCTTCAGC  
AGCAGAAAGCTCAGAATAAATGTCTGCGTAGGACACCCCATTCGCGACGACCGGCC  
CAGACTTTTTTCCACTTCGGTGCCTCGCCATCTTTGTGCACCAACACTTCAACTTGCCA  
GCGTTCAAACCAATAATCATAGGACGGACGAGCTGCGATAATCATTCCTAACCCTT  
CCTTGCGCAATCGCCAGAGTAGATTAGTGCTACTTCCTGGGCTCGTCCAAGTGGTTT  
TTTATCAGGTCAAGCACGCCCTGCTGACGCTCCGCGGGCAAACGAGCAACCAGCAG  
GATGACCTCGGCGAGCACATCCGAACCTGCATGGAAGTAAGCCGGCGGCACGCCCA  
GCGCGTTGCTCAAAGCAGCCAACGTCTCGTGGTCGGGCTCCCGCTCCCCCGCTCGT  
AGCGGGAGAGTCGTGACGAGGCAGCTTCTCGTTTCATCCCCAGCAGCGCTCCCAGTT  
CGACTTGCGACAGGCCCCGCCACGCGCCTGGCCGCACGTAGGCGACGACCAAAGACG  
GAACTTGTGGGCAGAGATGCGGGCATGGAGATCTAACTGATGGCTAACCTCCAAGT  
CTGCACCGAGTAGCATCCTAGCGCACTTATCTGCCAATATGGCAGATAGAAC

>CONTIG\_229\_length\_1917\_cov\_61.658101

CCGAGAGCAAGCATCTGATGCTGTCGTTCCCTGTACAAGGCCGACCCCGAATACGGC  
ACCGGCGTGACCCGCGTTGCCAAGGGTGACCTGGCCCGCGTCAAGCAGTTGGCCTC  
CAGCCTGCAGGAGTGATCCACCCGACGGCATCGCGGCCTGTGCCGCGGTGCCGTCTT  
CGTTTTTCGGGAGAGCTACATGCGCACCCCTGCTATTTCTGATGCTCGGCACCTTGTCTG  
CGGCTGCCAACGCTGCTTCACCCGCGTCTTTCCCTGCCAGTACCACGAATGCGACCA  
CCAATCCTGCGCAGATCAAGCTGCAGTTGCGCGAGTATTTTTTCGATGCGGCACGCG  
AAGGTCGGCAGGACATGCTCGCCGAGTTCATCCGCTCGCATTACGACCTCAATACCC  
GCGACGAGAAGGGCTACACCGCCTTGATCCTTGCCGCGTATCACGGCCAGCGCCCG  
GCGGTGGAGCAGTTGCTCAATGCCGGCGCCGACCCCTGCGCGCAGGACAAACGCGG  
CAACACTGCGCTGATGGGCGCCATCTTCAAGGGCGAGCTGGGCATCGCCAAACGGT  
TGATGCAGGCCGATTGCGCACCGGACCAGCGCAACAATGCCGGCCAGACCGCGGCC  
ATGTACGCGGCACTGTTTCAACGCACCGATGTCCTCAAGGATCTGGCCGCCAAAGGC  
GCAGACCTCAGCCTCAAGGACGGGCAGGGCAACGATGTGACCAAGCTGCAACGCGG  
CGAGTTCGCCACCGCGCCGGCGCGCTGAAAGCACACTGGTGATGCCAGGGTGCGCT  
CCGCGTGCCTTGCTTGCTGAACTGCCGCAGGTGCGGCACAGCCAGCGCCTACAGCCC  
CACGCACCTGTTGAGGCAGCACAGCGTTGAGCATGCTCGGCCGGCAGGTGCTGCCC  
GAGCGTCGCGCACTCCCGGCATGTGACGTCTTTGGCGAATCCTTCGGTAGTACCCAG  
CAAGCGCTCAGCGGCGGGCGGCACAGTTCCGCTCTGGTAAACCTGCGCCTTGTTCTCC  
GCGCCGAGAGGACCAGTACCCATTGCGGGCGCGTTGTAGCGCACGCAGGCAGCCGCA  
CGCAGCGGGCAGCCATCATCCAAGCTCTCCGACAGTCGTCAGGTCTTGATCACCAGAT  
CTTCCGGTTCTCAGGAGCCCCCTGCGCCACCCGTCGTAGATATGCACATCGGCCGGTC  
CATCGGCGCGGTGCGCCATCGGCCTGCCGAGAGTCGAAAAAGAGCTTCTCCGCGGCC  
GCCGGTTTTCTGCCGCGCGCGCGTGGAACTCTGGCGGTGGTGGTGATTTTTCTGCC  
ACCACGTCAGGAATTTTCTGACGCTGAAACCTTTGTGCGCCAAGGCTTTGACATAAA  
TCTGAGCGCGCGCTGACTTGCTTAAAATTCAATTGTAAAAAACCGCAGAAAACAGTTC  
AAGAAAGCGCGGGCAACGCCGATGCTGAAGCTATCGCACCTTGGAACCCCCGGACC  
ATGAAGCTCGATCCTTCCATCCCTTTCCTGATGTCCCTGCTCGCCATGGTGCTGTGCA  
CCGCCACCGCCGTCGTGGCGCTGGTGTGTTGGCCAAGTGCATGTCTCGCTACCTCGT  
GGAGCTTCTACACCGTGCTGGGTACCGCCCTGATCACGCTGGTCGCTCCTACCACG  
CGCTCGGCAAGCCGCTGACTGCCGAAGAGCGCGTCGGTTTCCGCAACCCGTAAGTG  
TTGCTCACGTCCAGGCGACGCGCGCAATCGCGCTGACGCCAGCAGTGGACGCAAGA  
AATCCTGCTTGTAAGCAATGATGTAGCGCGTTTGCTCGACAGGGGCGGGCGCCGCCA  
GGGACAGTAGCATCCTGCTCGGCCACCGCTACACCCACGGCCAGACTCAGCCGGCC  
AAACTGGCCCACGCCACCGCTGAGACGGCGCGATGCCGGCAAATAGCGA

>CONTIG\_230\_length\_1917\_cov\_9.353073

CCATCGAGCGCCAGATGCGCCGCCTGGGCACCTCCAGCGACTGGTCGCGCAGCACC  
TTCACGATGGACCCGCAACCCTCGGCCGCGGTCAATGAGGCCTTCGTGCGCTGGTAC  
GAACAGGGCCTGATCTACCGCGGCCAGCGCCTGGTCAACTGGGACCCGGTACTGAA  
AACCGCCATCTCCGATCTGGAAGTGGAACGTCGAAGAAGACGGCTTCCTGTGGT

CGATCCGCTATCCGCTGGCCGATGGCGTGACCTACGAGCACGTCGAGCACGATGCC  
GACGGCAACGAGACGCTGCGCGAAACCCGCGATTATCTGGTGGTGGCCACCACGCG  
CCCGGAAACCATGCTGGGCGACACCGCCGTGATGGTGCACCCGGACGATGCGCGCT  
ACGCCACGCTGCACAACGCCCCGCATCGTGCTGCCGCTGACCGGCAGGCAAGTGCCG  
GTGATCACCGACGATTACGTCGACCGTGCCTTCGGCACCGGCGTTGTCAAGGTCACG  
CCTGCGCATGATTTCAACGATTACGCGGTGGGCGAAAGGCACAATCTTCCACTTGTG  
AATCTATTCACGTCTGAAGCAAAGATCCTTGATCCTCGTCAACAGTACCCTGACGAC  
GAATATCCATTTGTGTCAGGGGATTCATGTTTCGTGATCTAAGCCAAACCCAACGGAAG  
CGTCTTGGTCAGCATCTCGCCTATAGAATCCCTATGCAGTATGTCGGCCTGGATCGC  
TACGACGCACGCAAGCTGGTGCTGTCCGAACTGGAAGACCTGGGCGTATTGGTCGA  
AACCAAACCGCACAAACTACAGGTGCCGCGTGGCGACCGTACCGGCCAGGTGATCG  
AGCCCTATCTCACCGACCAGTGGTTCGTGAAGATGGACGCACTGGCCAAGCGCGGC  
CTGGAGCTGGTTCGAAAGCGGCCAGATCCAGTTCGTGCCGCCGAACTGGATCAACAC  
CTACCGCCACTGGATGGAGAATATCCAGGATTGGTGCATCAGCCGCCAGCTGTGGTG  
GGGTCACCGGATTCCGGCGTGGTTCGACAATGGTGGAACATCTATGTAGCTCACAC  
TGAAGCTGAGGCACATAAGAAATTCGAGAAGAGACTGAAGGAGATCGAAAACCGA  
ATTCCAGGACCAAACCTCGTCTGAAATCAGGCAGCTTCAGATAGCTCAAGATATCCGT  
AGCGGAGGTCTTTTTTCAGGACAGCGACGTGCTGGAAACCTGGTTTTCTCGCAGCTG  
TGGCCGTTCTCCACATTGGGCTGGCCGGATGCGAACGCGATGGCCGAGCGCGGTTTC  
GAGCGCTATCTGCCGTCGTCCGTGCTGGTACCGGTTTCGACATCATCTTCTTCTGGG  
TGGCGCGCATGATCATGGCCACCGACAGCTTCACCGGCCAGGTGCCGTTCCGCGATG  
TCTATATCACCGGCCTGATTCGCGATGCGCAAGGCCAGAAGATGTCCAAATCCAAG  
GGCAACGTGCTCGATCCGCTCGATATCATCGACGGCATCAGCATCGAGGCGCTGGTC  
GCCAAGCGCACTACCGGCCTGATGAAGCCCAAGGATGCGCCCAAGATCGAAAAAGC  
CACGCGCAAGGAATTCCCGGACGGCATCATCGCCACGGTGCGGATGCACTGCGCT  
TCACCATCGCCGCGCTCGCCACGCATGGCCGCGACATCAAGTTCGACCTGGGCCGCG  
CCGAAGGCTACAAGAACTTCTGCAACAAGCTGTGGAATGCCACGCGCTTTGTGCTGA  
TGAACACCGAGGGCGCGCGTTTCAACGGCGTGCCGCAGCCGCGCACCGAAGCAGAG  
CAGTGGATCCTGGCGCGCCTGGACAAGGTCACCGCAGAAACCCACGCGCACTACGC  
CAACTACCGTTTCGATCTGCTCACGCAATCGCTGTACGAATTCGCCTGGAACG

>CONTIG\_231\_length\_1916\_cov\_10.671884

CCGGCTCACCTTCACAGATGCCGAGTTGAAGGCCATCTTCGACCCGGTGGAGTTCC  
CCAAGTGGGCGTCGAAATACCCTCATCGGTGGTTTCGGCCCGATCCTCGGGCTTTACT  
CAGGGGCTCGCGTCAACGAGATCGCGCAGCTCCGGCTGGACGACATCGACACCATC  
GACGGCGTGCCCGGCTTCTTCGTCCGAAAGATCGGGAAGAAGCAGAGCATCAAGAA  
CAAGCACAGCCGGCGGTTTCATCCCGCTAGCGCAGCCGGTGATCGATTGCGGCTTCCT  
GGATTACGTGAAAGAGGCCCCGACAAGCAGGACTGGAATTGCTATTCCCGGACCTGT  
CCAATTCGACGGGGCTGGGTTATGGGCGGCAGTTGAGCCGGCAGTTTTCCGTCTACA  
TCAAGCGGCAAGGGGGGTCGGAGAAGGGGCAGGGCTTCCATGGGTTGAGGCACACC

ATCGCTTCAAAGCTGGATGAGGCGGGTGTGTCTGGCTTCAGAGACTGGAGCACTCACT  
GGGCATGGGACCGGGCAGACCGTGTTGGAAAAGTTCTATATTGATCGGCGGAACCT  
GCCGGACCGAGTGGCGACGCTTGCCAAGTTCATTCCGCCTGTATTGCTTCCCACATA  
TAAGCCGGATGAATTTGAAATCAATTTGCTCAGATTGAAATGCCCTATGAATGATGA  
GCTTCTTGACGCCCCTGAAAGGCGCACTCCAATCGTATAGAAGCATTTTTCCGGGAC  
CTAGAACATTAGATCGATATTGAAAGTGGGTTCGTAAGTGTCTAAGGGGATGCCCT  
CGAAAATCACAAGCCATTAAGAGGGATGACGGTGGGTATTGGGGAAAAGATTTTTT  
CAAGATTTCGGGCCCTCAGAAATTTCCGGGTCTGCAATTAAGTTATTACCAAGACCGTC  
TGAGTGGCTTGATGCTTCCATTTTCATCTCATGAGATTGCAGGCCAGTATCTGAGTGC  
GCACAACGTTTTCAATTTCTGGGGGATGGGCTTGTTGAGCAAAGAAAGGTCTGGGGTATT  
CAATTTAAATCCTGTCGACTTCTGTAGGCTCTTTATGGTCTTCAATAATGCTGGTGCT  
TATGAACACACAAAGACGTGGTCTAAACGCTACGGGCAAAGAAAATCCTTAGAGGC  
TCCGTTAGGAGTCTATGTAATTAGTTTCGTTTCGCGGTTTAACTACTAAAGATGTCCGA  
GTTGGTATATTTAAAGCTAGTCCTTTTGACTTTTTTGGTGAGTCTCTATACATGGATC  
ACTTGAAGTTTGATGAGAATTTTTTCGAGGCAACTTATTGGCACCATCGCGATATCGC  
TTTCGCTACTCACAGCTTTCCGAGTTGGCATTAAATCAGTCAGGCTATTCGCTGCGG  
GGGGGTATGATCGCTTTCGTCATACCCAACCAAAAATCTGAGTATTGTGGCTATAGAG  
TGTGCCCCGAAATTCGGGTTTCGACGCGCCGCTTTTTTCGTGAAGAAATGAGGGATCCAA  
GATTCAAGGGATGTAAGAAAGTTTCAGATGTTGTTAGGCAAGATCCTGGTTTGTGGG  
ATGAGTTTGGCTTCGAGCGGATGATGGAGTTTGATATGAGGCCTGATAGCCATTCGT  
GGAATACTCTGATAGCCTATCTCCATAGCAAAAATCTTTAAATTTATCTTGTTAGGC  
AATCGGGATCTAAACATGGCTGGGGCGGATGATAGGAGAGAGTGGATGATAGAGGC  
GGGGAGACGTGTTCCACCTTGTGGGCTTCGTGACTGGTTCTACTCAAAGTTTTTGACT  
AGGAGAGGTTATGACGACTATCCTGAGTGATACGCCAGGGTTCCGTAGACACTCA  
AGACCCTCGTTGCGCGTAGCGCCGTTCAAACCTCTACAGGGGACAGGTGCGCCAGTTG  
AACCGTGGCGACGGTTGGGGTTGTAGAACATCTCGATGTA

>CONTIG\_232\_length\_1915\_cov\_17.252237

TAGGGAGGATCCAAGTAAATTAAGTGGCCTTCTTTTTTTCCGATATAAGGCGATGC  
ATTGCAAGCCAGTTGTCTGACCAGACGAAACTATTTAATTCAATTGATGAGCTGCTT  
TTTAAGCCTTTAATCCCGAGCTTATGAAAGTCCGACCTTCTTTTTTCCAGAATGGCAG  
ACTCTTCCATCTTTCCAGGGTAAGTAAAGCGTTACACGTGCCCCGACGGGTGGAAGTG  
AAGGCGATAGCTCGCATGTTGCAGCGCGGAGAGAAGCTCGGCCGCTAATTTCTTTTT  
TATGTAGTCCGACAGCCATTTTCAAAAAATAGGTAACCAGGTACAGTCATCATACTG  
CGCTGTTTCGAGATAGCGCAACGTTTTTAATTGTCGATATTAAAAAATTTTCATGTGGAG  
CTGGGTGTTTACGAGATATCACCCATCGTCCGGTTTGTGTGAATAATTTTTTAGGA  
TTTTTAACAAGTTATCTATATTGGCCGGAATTCCAAAAGACTTCCGCAGAGTGTTCA  
TATAAGTTGCAGACATATGTTTGCTTTGGCTTCACGGATACATCTTCGCCCCCTTCC  
TTAACCTCTCCTTGAAGTGGCGCGCACATAGCTCGGCACTGTCACCGCTGGTTGAT  
AGTGGCCTAACGCTTCGACTTGGATCTTCCGGGTGTTCCCGGCCGATTTGTGCACGT

AGTTGTCCTGCAGAACGGGGGCTTTCTTGTTGAGCGCATGACCAGTGATGAGGGCGA  
TGTGCTCAACCCTCACGCCTTTGGCGTCGAGTTCTGTTGCAAGCGTGTGCCGGAACG  
CATGTGATCCGATGCCTTTGCCGAAGCCTAAGCCCTTCAAGTAGGCGGCGAACTGGT  
TGACGAAGCCTTGGCTGTAGCGCCCATTCGGCTCACCCGTCTTGCGGCAGGTGCCAG  
CCGACAAGTTGGGGAAGAGGCGCGGGTGGCCAGACGCTTTGATGTCGGCCAGGAAG  
TCGAGGAGGCCGGCTTGGATGAGGCTTGGGTGGATTGGCACCTTGCGGATTGCGCTC  
CTGCCTTTGAGGCTTTGCCGGGTGCGCTTGCCGGCGCTTTGCGCCAGATCTTCGTCCA  
CGGTCTTCTGGATCGAGAAGCACACACGCCTTGGTCTTGACGATGTCGGCCACTT  
TGAGCTGCGCGATCTCATTGATCCTGGCGCCCGTGTAAGGGCAATGAGTGGGCACC  
ACCAACGGTGCGGATACTTCTTGGCCCAAGGCAGGAAGGTCTCGGGGTTGAAGATC  
TTCTGGATTTCCTCTGGCGAGAGCAGACGCTCGGGCTCGTCCTGATCAGTCAGGAGT  
TCTTCCTTGGCCGGCTTGAACGCATCCATTGGGGAGTGTGGGATGGCACGCGCCTTG  
ACCAGGGTGTGTAAGAAGGACGCGAGGAAGCGCCGATGCAGTTCTAATGTGGCATT  
GGCAGGCAGCGCCCGCCCTTGGCGTTGACCCTTGGCGATCAAGACTTCGACGCTCAA  
TCCCTGATGCTTGGGGTTGGTCATGAAGTCTTCGGGCGCCCAACGCAGCAGATCCCA  
CATCTGGTAGATGTGCGTGTGCTCAATGCGGGCAACGGACGTGTTGCCACTCACGCG  
CTGCAGGATGGCAAGCGTGCGGCGATAAGCATCAATTGTGGTGGTGCGAAGGTTCT  
GCCGCTCCTTGCTTTGAGGAAGTCGTCGACCTCTTCAGAGAGGAGTCGCGCCGGGG  
TGGCCAAAGGCAGGGGCTCAGGATAGCGAGTTCGGGATCGGCGAAGTCGTCGCAGC  
TTTTCATGATGGTCGTAGGTCGCTTGGACCAGGTCCTGAAGGTGAAGCGCGCCGGCT  
CGGTCTTGAACGACCATATCTGTAAATTCGACTTTGCCGATGCGAATGCTTCGGATG  
GATAACTGACCTTTGGGCTGTTGCAAATATTGATG

>CONTIG\_233\_length\_1882\_cov\_15.211966

CCTATAAGCAGAGCATCAACCAGCTGCGCGGGAGCATGGCGAAGCTGCAAAACACG  
CGCGACATGTTCGCCAGCGCTATCCCCAAGTGACCAATGACGCGACCTTTCAGCAG  
CTTTCCGCGATGGTTGATCAGTGGCAATCGCAGGGGCCGCGAGAACGTGGAGGACGC  
CCTCTACAGCGGCGCCGCGCTCCTGGACACCCTGGACAGCACTAACCAGCAGTTTCG  
AGACGATGGGCCAGGCCTCGCAGTCAGCGACAGGTGCCCTCGCTGCCACGCAGGCC  
GGTAACCAGATCAACATGCTGGTTCGGCCAGGAAATGATGAAGCTCAACGCACAAAC  
GGCGGCGATGAACCAAGCCGTGCTTGAGGAGCAGGCCCGGCAGATGGCAGGCGATC  
GCCTGACGCAGCGGAACATGGAGAACGCCTACGGCAGCGACAAAGCCTTCCAGAAA  
TCTAGTGAGCCAGCTGCCAAACCCGTTGGAGAGTGGTGGTGAACGCCCCGCGTCCTC  
GCCTCCGTGCTGCTTGCTGCTGTCTGCCTCGCCGGCTGCACAGCGCAACCCGATGTC  
GAGAAAGCAAAGCATGCAGAGCAGGCAGTCGCGGCAGGAAGTCCTTGCGAAGCGT  
CGTTCACCTGTGAAGCCCCAGCCGTACTTCCTAAGACGGTGCCGGCCAAATGCGGAT  
GCGCATTGCTATTTGATGCCGAGTGCAGCGCGTTGATCGACACCACGTATGGAAAGA  
GCGCGGCCGACAACCTGAAGACTAGGTTGAATATGGCGCGCGCAAATGGCGATGCA  
GCACAACGTGCATGCCCTACACCAGGCCAACAACATCCGCCCGCAAGCCCAAGCG  
GGCCGATGCGTTTGACCTTCCACTGTGGAGCCGGCCAAACCGGTTTCACAGTGGTG

GCCTGATGCGCAGACCAAGACGGCCCCCTGTCACCAAGCAATAGGACGGATAGCGAT  
GGACCCGACTACAACCTGGCTTCCTCACACAGCTATTGCGAGCGTTCCAGAATGTGTT  
CGCCAACGGGTTTGGGATCATCACACCCCGCGCTCAAGCAATTCTCGGCACCCTAGC  
TGCAATCGAGATTGCGCTAGCTGCACTATTTTGGGCGCTGCGCGGTGAGGACTTCAC  
CGCGCCATTCTCCGCAAGCTACTGCGCATCGGCTTCTTTGCCTTCCTGGTGGCATCG  
TGGCCAACGTTGACCAAAGGCACTGCCGAAGGCCTCGCCCAGATCGGCTCACTAGC  
TGGCGGTGGAACAGGTGTGCCATTAGTCAATGACCCTAGCCGCATCCTTGATCAGGC  
AATGGTTGTCATCAAGCCTATCCAGGACGAAATTGCGCGCATCCAAGAGGGGGCCGT  
GGTACCAGAAAATTGCCGTGCTGGCGGTTGTCTTCCAATACACGGTTGCGGAGCTGT  
TTGTATTAGGCGCGTTTTTCGTCTTAGCGCTAACCTGTTTGCTCACGCAGGTTGAGTT  
CGCCCTTGTCGCTGTATTGGGTCTGATCCTAGTGCCGTGGGGGATCAGCAATCACAC  
AGCGTTTCTCGCGGAGAAGGCCATCTGCGCAGTGATTGCACAGGGCGTCAAATTGAT  
GGTTCTGAGCTTCATCATTGCCGTCTACGGGCCGGTACTCAACACGTTTCGCACTTAG  
CCCAGCCCCACCGTTGATGGTTACGTGGCTGCTGGCCGGCTCCGCGATTGTCATGGC  
AATCATTGCGGTGCATGCCCCAGCAGTGGCGGGTGGCTTGCTCTCAGGCTCGCCGTC  
ATTGACCGCCGGCAGTGCGGGCCGGCGTGGCAATCGGTGCCGGCGCAGCTGCGATCG  
GTGCCGGCGTTGGTGCCGCCGCGCTGGGCCGCATGGGCGCAGCCAGTGCAGCCAAG  
ACCATCACCGCCGCTG

>CONTIG\_234\_length\_1877\_cov\_20.917714

ATGGAACCATGATTGCCTTCGCCATCGTTTCGACGTGGGCTATCGGGTTGAAAGCGC  
GTCTCGTATTCCGCGCGGCGCGCCTTGGGGTCTACTGAAATGGAGAGATTTATGAAG  
AACGTTGTCAATGCTGCCCCGTCGTTTCGCTTCGTCCACCAGCGCCAAGGTCAGTGCC  
GGCGCATCCACCCTGCTCGCATCGGGTGCCGCGTTTGCATCCGGTACGGGGTTCGCT  
GGTGCCGCAGTCGCTGGCGAGTTGTTCGACCGCAAGACTGATGTGATGTTGGTTCATC  
GGTACGTGCGCCGCGATCCTCGGTGCCCTCATCCTGTGGGCCTACGTGAAGCGCGCC  
CGCTAATCGCTTCGCTCCAGGGAAAAAGTGGGAGGGGCGCGCGGCAACGTTCCGCC  
CTTTTTTTTAGGCAAAAGGGGGAGTTATGGGCTATTTCAATTCTGGTGGCAATCTTG  
GCGCAGTCTGGCTCGCATTCGAGGGGCTGTGATGCGCTGGCTTGACGTGTGTTTCGC  
ATCAGCTGTCGCTAGGCGCGTTGCCTATGCCATCGTCGCATTGGTGTTTGCTGCGCTC  
GGTCTTGGCAATGCACGTGCAGCCAATTTTGATGATCAAGGGTTCGGCGTATGCGGCG  
TGCATGGCTGCATCAGCGGGTCATCCTGGCTATGCCGATGGTCGCCCAGTGACGACT  
AACTGCGAAAAGTTTGGTGACTGGCCGCAGTACACCTGTTACGGATACAACCTCAGG  
CGGCGGGCAGATCATCGGCTGCATGGGCAAAGACCCGTTTTACATCTGGCCGCTCG  
ATAAATATTGCAAAGATCGAAAGAGCGACATAACGCAATTCCAGCCGATGAACGGG  
TCTAGCCAGTGCTGGAATGGCTGCGAAGTCAAGTACCGGCAGAACGGCGACGATGA  
AACCAGCACCCGCAGCACACGGGCGGCGTGTGCGATCCCGACTATAAGAAGAAGT  
GCCCAACCGGCTCGTTCTGGAACGGCTACATGGGCGTGTGCCAGCCTATTGAACCTG  
ATTGCCAGAGGGCCAGGTGAAGCAGGAGGGCGTGTGTAAGCCTGAGAATAAATGC  
CCACAAGGCATGGTCCCGTGCAGGCGTCAACGCCTGGTGCGGTGGCACAGGGAGC

GCTCTATTGCGCACCTGAAAAAGAGGAATGCCCCGCCCGGCACGATCATGTGCGCCGT  
CCGGCAAATGCTTGCCCGGTGAGGGTCAGTGCGCGGCCGGTGAAGCACCTGGCAAA  
GATGGCACGTGCAAGAAAGACAAGGATGGTGACGGCAAGGGCGACGAGGAAGGCG  
AGGGCGAAGGCGAGGGTGGTGAAGGCCAAAAAAGATGAGGCATCAGGCGGTGAAAG  
CTGCGAGACGCCTCCTACCTGTAGCGGCAGCGCTATCCAATGCATCCAAGTGAAAAT  
TCAGTGGCGCATCGACTGCAATACGCGTCGTAGTCAGAACATCAGCGGAGGCGCAT  
GCACGGCAGTTCCTGTGTGCACCGGCAAGGCATGCGATGCAATGGAGTACGCACAG  
TTGATGCAGCAGTGGCGCTCAACATGCGCCCTCGAAAAGATCGCCAAGGGAGATAC  
CGCAGGCGGCAGTAATAGCGATAAGAATGGTAACGGCGTAGCCGACGTGCTTGAAG  
GCATGGGTACCGTTCCAGAGGTGGGCGATGGAAAGGCTGACATTGAAGGCGCTAAG  
AAATTCGGGATTCGACTGTCAACTGATAAGTTGGACAGGGACAATATTTTTGGGTCC  
GGCTCATGTCCGGAGCCTCCTAGCTTCACGATTATGGGCAAGACGATCAGCGGTGCC  
GATTTCCCCTATTTCTGCCAGGCGGCTGCAATTCTAAAGGCGTTGATTTGGATCTTCG  
GTGTGTATACGGC

>CONTIG\_235\_length\_1876\_cov\_26.930246

ATATTCTTCTGGGTCCCATGATCAATCCTTTCTTCTATGCCCTTGGCATTGGAAAGAG  
CGTGGTCGGATCCCTGCATATCTGGCTTGGTATCCCAGCAGCCTTCCTCGGAATTTTG  
GCTGCAGGCACTAGCTTGAAGCGCATGTCCTTGAGCACGACCATCCTTGTGCGCGCA  
GCTCTCCAAGTCCTTGCCCTCCTCGTTCTTGCAATCGCTTTCGTCCAACGAGCGGTCCG  
CTGAACTGCTTTGGGCTAGCGTTATTCTTCAAAACCTTGCCAGTAGCTATACCGGCA  
TAGCCCTGGTTGCTTACATGTCAAAGCTGGTCACGCTTGGACGAGCAGGTGAGCACT  
ACGCTTGGCTAACCAGCTTCTACTCCATCTTCGGTAGGGTGCTTGCCGGCTTTTCAGG  
CCTTGCAGTGGCTTATCTCACCACGCTCTATGGACAAAGCCAAGGCTATGGCACTTT  
CTTCATTGGCATCTGCCTGACGTGCGTGCCTGCCCTACTCGTCTACTCGCTCATCATT  
CGGAACAACCTGAAGGAGCGACCCGAAACGTAAGTGCCATCACGCTACTGCTTTGC  
AATGACTGTCTTGGCTACTTACGAACATGTAATGCTTGATCTCATTTATTTACGCCG  
ATCCTAATGTCTATCCACCTTAGCGTTAGCCAATTAGATGCCTAATTGGCTAGCGCC  
AGCGAACCTCATCAGTTTCGACTTCTCGTGAGACCAAGCAAGCACTCGCCCTTAGAA  
CTCGCCTTTACATACACCGACGTTTCACCAAGATTGGTTTTGTAGAAGACATCCTTGC  
TGGCGTCCGCAAGTGGCGCATGGGGATTGGGTGGCAGGACATACGGAGTGAGCGCA  
AATTTTTGCTTGATCTTAGATACCTCGTAACAGCGACCGGGAGCGAGCTCCATATAC  
ATAAACTCACTCCTTTATCAAGTTCAGGCGGGACCCTGAACTCAATAAAAGAGATC  
CCATACTGATCCCGCGTCTTGAACGCATTTGAGCGAAAAGCAATATTCAAAGATCGA  
CTTGAACCTACCTGATGGAAATCACGGAGTCCAATTTTCGCGGAAAACCTTCATAGTTT  
ACCGGCTTACCGGATCATAGATTTTACCAACTATTTTCATCCATGGCGAGCCCTGAA  
ATTCCATCTTCCGCAACGGCGCTTGTGCAGAAGACAGCCAACAGCAATGTAACCGC  
AAGACCTTTGTGCACGCCCAACATTACTGGCCTCTCAAATAAGCACGGAATTCAATT  
GCAACCTGATCTACAAGCGATAAATATCTAAAGCAACCGACAACAAGGAAGAGTCC  
CCTTTGACCAAAGCATAAAGAGTCCCTTGGTCAACCCTGTGCAACGCACCGATTTTA

GCCAGTGAAACTACTTGACCATCGATCTCCGCAATTGCTTCTCCTTTTTTTCAGAAGTC  
CTGTTTTATTTTTTTGAATATGTCATGAGGCGCGTTTTACCATTAGTGACCCAGGCTCC  
CACGTATTTGTCGTCTAAGTGATCGTGTGATGGCGATACGAGAATTGAATCGACCAA  
CACGCCCTTTGACAGCGCACCATCTTTAGCTGCAAGAGAATTACCCTTATCAACCTT  
CTCGGGACGAGGATCTATATCACCAATAATCCCTGGCTTCGCCTGAATTTTTTAGGTT  
GGTGGATAGGTAGTAGGTATCACCAGAATAATAGTCAACAAATTGAGCGCACGTGC  
CTTTGATCGCATGAACTCGGACATTGTCAACCTTGCTTACCTTGGCTAGGGGGACTA  
CCAAATTTCGCACTCCCGCCCTCCACATAGAAATTGTCTTTAAGCTGAGACTTTTCTGA  
ACATAGAGCCCTAGCAGCACTCTCTCGCTGGTCATTTGAGCGGGCCT

>CONTIG\_236\_length\_1874\_cov\_22.532341

CGCATTGACTATGCGCTCGATCAGCCCACAAAGCACGATGAGCGCCACGATTGGCT  
CTCCGACCACATCAGAGGCAAAGCAAGCTACGGGTCTCCTGTTGGCGAGGAGATCG  
CGGCGCTCCTGCGCGAACTTCCGAACGCACATCTCCATCTTTGTGCGGCCAACCGCT  
GGCTGAGACCACGACCGCGCCTTTCCCTATCGCGTCTCCAAACGCCGGGCGATCAAGC  
TGGTGCGGTCGATCCTGGCCGATCGGTGTCGCGGACCCGAGCGGGTCTCGGCTTTTA  
TCGCAACCGAGGTCGCGGTCTCACGCCGCGTTTGGAAGGCTTACCGCCACACTGGC  
TTGTCCTGGGCTACGCAAGCGATCACGTGTCCACCGCCTTGTATTTCTTTGATACGCA  
TCGTATGGCCTATACAGTCCAGCTGGAGGGGCCACGCGTGCGTGGGGGAACACTGA  
TCTTCGGTGCCGAAGTCGCAGATGAGACACTGGGCATCACCAATTCTGGCCATCGAA  
CCGTGCGGCTTGTCGACTGCGAACCTAACAGCTACTTGGTAGGTCTAAGCTTGAACG  
GGCGTGATCAATCCCTACCGCACTGCTCACCTTCCCGGACGCTGCCGTTGCAGCGC  
AGACATTTAACTCAACCACCACCCATGCAACCTAATGCCGTTGATGCGCAGGCGCTT  
GGCCTGGCAATGCAACTCCTGTTCAAGACTGACCGCAAGAAGTTCAGTATCGCAGC  
GGCTTATGTGTGGCTATGGCCTGCAATTCGCCTAGGCCAGCTCGTCACGATTGAAGA  
CGAAGACGGGGTCTGGACCGGCTACGCCTTATGGGCTTATCTGACGCCTGAAACCG  
CCAGTCATTTGGTTCTGCAAGATCCGCCGTTCTTGCCGATTAGCGACTGGAACGAAG  
GTGATCAACTCTGGATCTTGGATTTCTGTTGGCTATGCCAGGGCATCACCGACGCCTGG  
CGAGAGCACTCCGGCATCGCTTGCGCCCTCACTTCAAGCAAGCGTATCGCTTGGTGC  
GAGATAAGACGGGCGCTATGCTGGGAACCAAGACTCACACACTTCGCAAAGATGGC  
TGAGGAAGACACGTTGCTTCCTTGATACGAATGGACGAACCGAAGCGACAAGGCAG  
TTGCAGCCTATGCACGAAGTGACATCAAGGTCGACCAAGGCCTGGACTGGATTTTTG  
TTCCTGGGCTTCGGTTCTGGTTTGCCCTATCCGCTGATCGGCAGCACCTTAGGCTATT  
GGCTCAGCGAAAAGTCGCTTTCGATCGCAGTCATCGGTGCCTTGGCTTGGACCGCAC  
TTCCCTACTCCCTAAAATTCCTATGGGCCCCGCCATCTCGACCAACGTCGTGCGCCGG  
TCGTTGGAAGCACCATGTCGCACCGTCAAGGCTGGATTGTCTTGTCTTCGATCATGG  
TCGCCATCTCTCTCCTAGGCCTTGTCTGAGCGTTGTCGCTGGCAGCCTTCCGCTGAT  
TGCACTGAGCTGCATCGCAGCAGCCTTTGGCGGTGCGACCCTGGATGCCTCAGTCGA  
TGCGTTCCGGATCGAACAAGAGGCAGTGACCAGCAGCCAGCCAAGCTCCTCACTG  
CCTACCAATTTGGCTACCGCATTGCTCTACTGCTGAGCGACGGTCTGGTGTCTTGCT

CGCAGCGCGGCTGTCCTGGCAAGTTGCTTATGCACTTCTGCTTCCCCTGATGTTGGTG  
CCCATCTGCGGAACGCTCTTTCTGCGATCTGCCCCGATAGCGTCCTCACCCCAGGT  
CGCACGAGTGCGGAGAAGCAGGGGGCTCCGTTGGTGTCGCTTCGACCCTCCACGCT  
CCAAGGATGGATCGCGGTGGTCGTCTTCATCGGCTGCTATCGCCTACCGGACAT

>CONTIG\_237\_length\_1854\_cov\_6.641575

GATTGAGGGTCTTTTCGCGTTGCGACTGCACAGCGAGCAACGCGATCATCACTAAGG  
CCATAAGCCCGACAAGCCACACCCACAGCAATATCTGGATGATCGAGTAGGCTCGT  
GAATGTTTCGCGCCCGAGATGATCTTGGATCTAGTCATTGCTGGGCTCCAGCTTGCG  
GAAACACCTGAGCCGGCCCGGAGCTCTGAAGATCCTGAGATGGAAGTTCAACATGA  
GTTCCAGGACGCACAAAGCACACCTGCCGTGTGCTGTCATTGACCTCAACATCCCAA  
GCAGGGCCTGCAATAGTGAGTAACGCATCGCGCAGGGTCATAGGGCCCAATTGCAG  
GTGGGCGGCGGGCATTGGGAGCGGGTAGAGTTCAAGGGCGGCAGACCCCTTCTCAC  
ACATTTGGTAGCCACTGCGGTTGAGAACGTGGCGTAGGCCATCGCCAACACTAGCTC  
TCGCTTCGTCTGGCATCCGCACATCGATGACCTGCAGCAGTAGGTCACGCTGTGCTG  
AGCCAGGGGACAGTTCAACCAGGGTGTAGCGCCCATAGCGGATCACTGGAATCAAC  
TCCGGATCGGTCTGGTCGCGGGGAGCGATTACCTCCTCAGTAGGGGGTGGCTTAACT  
TCTGAAGACGTAGTGGCGCAACCACCAGTAAAAATGGCAGCGACTACCAGTCCACA  
GCCAGCCAGGAGTGAGGAGCAGCAGATGTTTTGCATGAACCGGCTTCCTGTTGCAGT  
AAGCCGACACCTTCGCTGCGAACAACAACTCAGTCAGCAAAGAATACGAACTGGAG  
CTCGCCCATTTCTAAAGATGAACCGTGTCTACTCAGGCTGTCTCCCCAGCAGGAGC  
CTTAGCAGAGGACGGTTCGTAGGGATCTGCGTATGACTCAAGCTTGAGCCGATCCCA  
CTCGTCCTTAAGTATTTTCTGAGCTTTGGAGATGACACTCTGATGGATTGCTTTAAAG  
TCCTTCTGGATTAGCTCCGGCGACTCTTTGCTTACGGTCCGTTGGAATCTGATTGTTG  
TTGCTTCCAGACTTCCCATGAGCATCTTGAGATCTTGGTGGTCCGATTCCGGTGATGTT  
TAGTCGCAGTGCTATCCGCAGTTGCAACTCCAATGCCTCCATTCGCATCCCGGCAAT  
AATCAGCTTGAATTCCTTCAGGGCGCCATCAGATATCGGCTCTATGCGCTCCTCGCT  
CACGACTGCATCCCATCGATAGGAGATCTCCTGCCATAGGCATAGGTACTTGGAAT  
GTCCTGACGTAGCTCATCGATCCAGTTCTGTCGTTTTGCTGAGATATTGGCGATTGCA  
ATGCGTCGCGAGGCTAGCTCCTGCATGGAAATTTGCTCGCTCAGCGCCAGCTTCTGT  
TGCAGCGCCTGTTGATCGGCCAGCTTTAGTTGGGTCTTGCGCTGCCCTCGTGCTACCA  
GCATTTGCGTCGTCGATGCAACAACGGCGGCAAATATGGAAACCATTACCGCAGCG  
CTTGCGATCCATACCTTGTTGATGAACTCGGCATTCTGCATCGCGTCCTGGACAATCC  
TTTGGATCGCAGCGAAATCATCTGGGCTCATCATTTTTCTTTGAGAGTAAGCGGCG  
AACGGTGCGCCGATTGAGGCGAGAATCTAGTTTTGGCAGTTAGTGCTTTTTTATTT  
GGCAAGTTGGCGATGCTGCCCCAGCCATCAAGATCGAACAGGGCCACGCTAAGATAA  
GATATTTAGAAGCTTACTGCGGCCAAACACAGCTTGCTCGATGACGTGATGGCCTTT  
AAAAAAGGCGTCTCTGCCAGACTCATACTCCCGTTCGAAAATCCGTAAGCCAGACTT  
TACGAGTCAAAATTCCGAAGCATCGGTCAGTTC

>CONTIG\_238\_length\_1842\_cov\_8.318367

CTTTGGTGACTTGGGCATACCACGTCAAGAGTTCTACCTTAGCAATCGAGCGTGGCG  
TGCTCTTGCTGATCAGAAACGGATTGCCGTGCTCACGCTTGAAGTGGTCGAATTGGC  
GTCTCGGGATGCCAAGGTAGAACTCCGCCATGGCTTGGGTAAAGCGCGTTGTGCCCCG  
GGGATTGATCAAGTATCTTGCGTAGACTGACGAAGTCTCTTGCATCGATGATGGCAT  
TGCGCTCATCGCGCTTGGCGATGACTTCAAGTGCTGCGCGTAAAAATCCGTCTTCGA  
AACTTTCCGCCTTGCTGATATTCGTCATAGATACCTAGGCCAGCTAATCACGCTGTTT  
TTCAAGATCAGCGAGCACTTCCGCTGCTGTTGGGTCTCCCATCTTGCAACCTCACG  
TATGAGAGCTAAACCTGCAGGACGATCGATAACTACACCAGCGCCGTAAAAAGAG  
CAATTCCGTAATGCAGTTTCGCTGACTGATGCCCCGCTTTTGCAGCCGCCTCATACC  
AGCGCGCCGCTTCGCTCTCAGACTGATCGACCAAATCACCAATTGCGTAGCAAACA  
GCAAGCGCATACATTGCCGGCGCAAACCCCAACTTTGCGGACTGGCAAAGCATATC  
AAAACCTCCTTTTCTCAAATTCGCTGACACTTTCCTTGACAACACTACTAAAGGTCGA  
AGACAGAAATAAGGCTTCTGGATTTCCTCTTTCACAAGAGGCGCTAGCTTATAGTA  
AGCTAGATCATTGTTTCCGACCTCCATATCTTTCTTAGCGTCATTGATACGTTGCTGT  
ATTTCTTTACTATCCATGGGGAATAACCTTGTCAACCCTTAGGGTCAGTGCAACGGCA  
CTGTATGTGATGAGTCGACTTCGCGCCAAGATTATCTTTGGCATTCTTCTCAGCCATT  
CGCTTAGCTTCGGATAGTGTGGGCGCACGCCCATATCCAAAAGCAAATTCCTGGTCG  
TCAATAGAGCAGTTATCGGCGCTTCTTCCGTCGCGATTGGCGCGACAGATACATGTA  
TAGTTCCCTCGAACTCTGTCTGGATATGGAACAGCATTCTGTTTTGGAGGCAGACCTA  
TCACCGGATTCTGCTGATCCATCAAAGGGCACCGAATTCTGTGGGTGGGTCAGGTCA  
TAAAGATCAGTGCTGGGCTGCTGCTTCCCTCCCGAAAGATACTCATAGCCAGCATTG  
AAGCCCGCACCAATGGCTGCACCGCCGAGCGCTGCCACACGAGTGGATGGGGAGG  
CGGAAGCCCAGGCAGCGGAATTGGCATAGGCACTGCAATTTGCCCGGATGGGTCCG  
TCATCTGAACTGGTGACGATCCAACATATGCATATGAGTTCATTCCCCCAGTAAGAC  
CAATAGGGTCGCTCTGTGCATAACGCCCAGTGGCAGCGTCATAGTCACGGAAGTAG  
TTCTGATTTAGCCCACTGGCTGCATCGTAGCGTTGCCCTGGGAAGCGCATATCGAAG  
ACGAATGCTGCGCCATCGCCATCAGGGTCTTGATTGGGCGCGGTGTTACCGAATGCT  
TCGCCTTTCAGACTCCAATTCCAAACCGCCACATCGCGCGCCGGGTGCATCACAACA  
CGCGGGCTTCCCAAGTGATCGGGCTCGATGTAATGCAACTTCTTCGTATCAGTCAGC  
AGACCAAGCGGCAAGTCGTCCAACCAAATTGCCTGCTGCCTTGCAACGCCGTTGGTA  
TCGTAGTCGCCTAGGGAACCTCTGAACAACGCACCGCAGATAAGCGACACTACCCC  
CATGTTGAGGAGTGATCCATGCAACTGACGTTCCGTTGACGCTGAGGGCCTGGGCAA  
GCGCAAGCAGACTCGCCGGGAGA

>CONTIG\_239\_length\_1837\_cov\_50.571345

GAACAATTCTGCTTCGATCAATTCACCGGGCAGTGCGCCACAGTTGAGTGCGATGAA  
CGGGCCGTTCTTTGCCTGCGAGTTGGCCTGGATGATCTCGGCGATCTTCTCCTTGCCG  
CTGCCGTTGGGGCCGGTGATCAGCACCGGCAGGTCCGAGCGTGCGACCTGGCAGGC  
GAGCGCGATCGCGCGTTTCGCTGGCCGGGTTCGGCGAACACCGCGCCGCGCAGGTTCGT  
AACGTTGGGTCAGCTGCTCGCGACCGCGGCGCTCGCGTTTCGCGGCGGCGTTTCGAGTT

CGCGGCGTGCTTCGGACAGTTCCAGCAAGTTGTTGACCGTGGTCAGCAGCTTGGTGT  
CGTCCCAGGGCTTGGCGATGTAATCGGCCGCACCGGCCTTGACCAGGCCCACGGCG  
CTACCCAGATGGGTCCAGGCGGTGAGCAGGATCACCGGCAGATCCGGATGGCGCTG  
ACGGATCTGCGCGAACAGCGCTTCGCCTTCCTCACCGGAGGTGGTGTGCGCGGTGA  
AGTTCATGTCCTGGATCACAGATCGAACCCTTGCTCGTCCAGCAACGCCAACCCGG  
CCTGCGGCGAATGCGCATGCCGCGCGTCGATGTCGTGCAACGAAAACAGCACCTCC  
AGCGCGGTGGCCACGGCGGTGTTGTCGTCGATGATCAGGATTTGCGGCATCGGGTGC  
TCGGTGAAAGGCGCGGGGAGAAGGGCTATCAGAACAGGATTCGGCACGCTGCGGA  
ACGGGTGACGCGTCGCAGGTGAAGTGTAGGGATGCCTGCGCTTGGTTTGACCGCAC  
ACAACCTGCGTTTGGCGTGTAGAGGTCGTTGCGGTTTGGCAAAGGCGCGGTGATGCA  
GGAGGCTTCGTCACGATGGTTGACCTGCCGGACCCAAGTAGTCCGGACACGTGCAG  
GTGTTGCAGCCTGTCGGTGGCAAAGTTGTGGCGGTGCTGTATGCCTCAGCGAAGGAA  
TCGACGATGCCTGCGCCTCAGCGGTCTAGGTCAAGGTCAAGGTCAAGGATATCGAC  
GCTGGATCGCGCTGGATCTGCCTGGTGGCAGCGCGGCCCGCAGTGGCAGGCAGGGT  
GGTGACCAATTGCGCGATCTGTGTAAGCGGCTTACCGCCGCCGCACATCGTCGGCGG  
CATCGCCCCGACGATGTGCGGAGATACATCACGCGCTACGCGTTGCCACCGCCGGT  
GGCACCAGCGCAGCGCGGCGGGCCGGCCAGAACACCGCGATCTGGCCGAGTGCCCA  
CAAGGTGACTGCGCCGATCGGGAGATAGATCAACGGCAAGCGTGGCAACTCGTAAC  
GCGCCATCAACCAGAGGTTGATCGAATACGCCATCAACATGCCGAGCACGATGCCG  
ATCGAGGCGAGCAGGAAGTTTTTCGATCTGGAAGTAACGCAGGATCTGGCCTCGTGT  
CGCACCTAGTGCGCGGCGGATGCCGATCTGCTTGGTGCCTTGCTGCACCCAGAAGCT  
TGCAAGGCCGACGATGCCCAATGCGGTGACGATCAGCAGCGCGATGCTCATGGTGA  
CCAGCAGCCAGGCCATGGAGCGGTCCTGGCGATAATAGTCGTTGCGCATTTCTCTA  
CTGTTGTGGGGCTCTTGATGATGCGGTTGGAGCTGTTCTTCTCCAGCACTGCGACGG  
CCTGGCGCAGAACTTCTGTGTCGTCGCGCCGGATCGGTGCGTAGCAAATACATCCCGC  
CATCTTTGTAGCTCACCTTGATCGGAGACAGCATGGAGTCGTCGTATGAGGAATCGC  
CGCCGTAATCGAGAACGCGCGCCAGGTGTTTCGACGATTCCAACGACCTTGCTGGGT  
GTCGGTCCAATGTAAATGGATTTGCCAGTGC

>CONTIG\_240\_length\_1833\_cov\_115.287808

AGCGTGTAGCGCTATTCGGATCCAGGCGGCAGCAAGCCTTGGCCACTGCTCCTGGTC  
TTAAACGCCACATCAATAATTGTCTCCACGCGGACCAACCGTTCCCGCGTTTCGATA  
CTTCCGCGCCAGCTTTTCAACCGTGCCAGCAAGCACAGTCACGCGCTCGTTCATC  
ACGATCACCTCGCGCAATGCCTTCATGACATCGGTCAAGGTTGTCACCTGCATTTGCA  
CCTTCTGAGCTCGAGCACGTGCAGCCTTCTCGGCGTTGGCCAAGTCCACCTCATGGG  
TACTTAGGCGCGCGAAAGCGCTAGTGAGTGCCTTATTTGCCTCCTCAGTAGATGCCC  
GCAGCTGGTCCAGCAGCGGACCAATATCCTCACCTTCAAGCACCTGGCGCCGAATGT  
AGTCACTAATGGTCAACCCTGCATGGCGGGCGCGCTGCTGAAGCGTGCGCTTCTGCG  
CAGGCGTCATCACGACCGTGATGCGTTCAGTACCGTTGGCTTCGCGGGTAAGAGGG  
GCAGGCATGTGGGCTCTCCTGGGACGCGCTGTTTTTATCATAATCAGCCGCAAAACG

GAAACGCCATGGCTAGAGGGTCGGCCCCGGTATGACGCGCAAAGCGATCAATTGGTA  
ATCGGGCGCACCCGCGTGCTTGTTGCCGCCGTTTTTCGAGGCCCTGGCGCAAGGCATT  
GATGAAGACGTGTCCGGAGACGAAGACAAGACAGTATTGCTGAAACTGACGGAAG  
AACAGCACAAGCGCCTCCGCGTGCGTGCCGCGGAAGCCAGTACCACGATGAACGGG  
CTGGCAAAGCTCGCGTTGCGTCGTAGCGGGCTGATGTAGCTAAGAAGAAATGCGTG  
CGGTCCTGAATTGGGTGCATGAGCAACAAGAACAAGCCTAGTCCTCTGACGCGTCA  
GACGCGATTATAGGTAACGCTCCTGGCAGCTCAGAAAATCTAGGTCCGCACAGTAG  
TCATTGCCGAACAGGCAGTCTGTTTCCTCCCTGTGAGCCAGCCCAACCCTGCTCAGG  
CGCCCCGGACCCGGGACCATCGGTCCCGGGTCCGGCAAAGCTGTTTGCGTCTGCTTT  
TCTGACAGCCCCCTTCGGGGCGTGGTCACAGGGGTTCGGCTGTGAGCCTACTGCCGAC  
AGATCGCTTGATTGGGGTGTAGGGGGCCCCCTACGGGCAACGCTTCACTCGCGCAGTGA  
ACAGGTCGGCGCCGGCAGCAATGATGATCCGCCAGCACGTCCGCAAGATCCCACAT  
CACTCCCTGCAGACCGCCTTTGCTTCTGCTCTGCAGCTTGGTCAGGCGCGCGCCAAT  
GCACAGCTGCAGGAGCTGTCGCGCTTCGTGGCCACCTGCAGGTGGCCACCAGGCAA  
CGCGGCCGTCCACGCGTGATCCACGGCCAGCGCGGCAGCGCTGCCCCGTCGCCGTGG  
GGGATGGTTGTATCCATCCCTAGGCGTCGGGGAAGCGGTGGGGCACGGGTGGGCGG  
GCCTGCCGATCGCCGCTCGTCCCCGGCTTGTTCCACAGCGTGCGGCCAACGGCCGCCG  
TTGACCAGGTAGCGCCGTCTACCTGGTCAACGGTCGCGGTGGGCAAGCGGGGGGCG  
AGCGGCCAGCTTGCGCGCCGGCTGTGCCGGCGTGCTTCTGCAAGCGGAGCGCGCCGG  
GGCGAGGATTAGGGCCGACTGGCGATGACGCGGCACGCGGCATCGGTGCGCAGCAC  
CCCAAGCCGGTGACCGCTTGCGGTACGCCCCCGCCTGGGGTTCAGCCGACATACGT  
GTAAAAATAGCTCACAAGCTCGGATTTGACCCATTGCATCAGTGAGTTAGCGGATAT  
TTTGCGCAACAAAACCTACACGACC

>CONTIG\_241\_length\_1804\_cov\_23.986285

CTCCCATTAGATCGGAATACCCCTTGATGGTGTCAATGTTTATTGATATCTGTGGGTC  
GCCGTTGTTATAGTCGGACTGCCCAGTCGCAAACCCATTACTATAGCTAGTGCCCGC  
TTCGTTTACCTTGTAAGTCTGCACTGAGCATCAAGCTCTTAATTTAGACATCTGCACT  
ATTGAACCATCGCTCATTGTCATATAAGCATTATCAGGAAGCGAGCTGATAGAGTCT  
TTAACAAAGTAAATTGCATCGTCAAATTTAACCAGAGCTGCAGACTCTTCCGCTGTC  
AATGCACGCGAGAAGTTGAGGTCGTATTCGGGCGCTGCTGGAGGAGGAGTGCCGCC  
TCCACCTGGGGGGGTTATCGGCCCTGGCTGCTCAACTGGCGGCGAAGGGGGAATAG  
TCGGAGGCGGACTCGGAGGTGGACTCGTGGGCGGGTTCACCACAATTGGTGGCATC  
TCAGTGGGCGGCTCACTTGGATCGACGTCCGCAGCGGCTGCGGCGCCTGCTACTAGG  
AATAGCTCTTCGTTTGTCAATTCTCTCATTACAGCGCTCCATTGTGTGCGTTGACTTT  
AGATACGATCGTTTTTCTCATTGAATACACCACCGCATTCCCCTCCAAAATTATTTAT  
TGAAGTTTTCGACTTATCATTGCTGGCTAGATTTTTTCGGCATCATCCACATCAGCGCC  
TTCTTCAAAGGATCTAGGCTGCTCCTTAATCAAAGGCCTCAGATTTCCGCTCACGAA  
GAGATACTGCATATCGCACATCCGAGAGATGTTCTTGTCGTGCGTCACGATGACTGT  
GGTCGCGCCGATGCTCCTGATGTTCTTCATCAGCTGTATGCCCATCTGCTCATCAACG

CCAGTCGTTGGCTCATCCATCAACAACAACCTTGGTGCGCCTGTAGAAAGCCCTAGCG  
AGGAAGATCCGTTGTTTTTGACCGCCTGACAGCGTATTTCCCAAGTCACCGACTCTG  
GTGTTGAAGCCCATTGGCATGCGCTGAATATCGTCGTGGATACACGCCAATTTTCGCA  
GCCTGCACGAGACGTTCTTGGTCAATGTGCTCATCGAACATAGAGATGTTTTCCGAC  
AGCGTTCCCGACAACAGATTGTCTCCCTGCATGACGATGCTGACCTTGCTCCGGTAG  
CTCGACTTACCGACCTTGCGCAGATCCTCTCCATTGACTAAGAAGTCTCCGACTTGA  
AGATCTTCAAGCCCCGCCAGAACGCGGATGAGTGTGGTCTTACCCACGCCTGAGTTT  
CCGACAATTGCAATCACCTGGCCTGCCGTGGCCCTGAGCTGCAAGGCGCTCATGATC  
CACTTGTCCGTAGACGAGTAGCGGAAATAGCCGTTGGCAATGGCGATAGCGGGCGC  
AGCATCCTCCAGCGCGCCGTTACCATGCAGAAACGACTCAGGCTCGCTGTGCGTGAT  
GTCTGAAATGCGCTCGGTGTGCAAGCGAAGCAGCCGGAGCTGCATCAAGTAGTCGG  
CCAGATTGATGCTGCGTTGGCTGAACTGTGTGCGGTAGATCAAAAAGACCGTCAGCA  
CCCCGAGCGTCATATCCCCACTGAGCACCAACCGGGTGCCTTCCCAGATCACAAAG  
ATGCGGCACAGGCCCTTGATGAGGAGCTGGACAGAATCGAACCCGATGCGGATGCG  
CTCGGCTCCGATGGTCGCATTGGTGGCTTTCGCGCTGTAGTTCGTAAAGCGCGACGC  
CCAGAGCGCTGACTTGTGAACAGCTTGATGGGCTGGATGCTTCGGACCGTTTCGTA  
GAGCAAGCTTTGTGCGCGTGATCAATGTTGATTTGAT

>CONTIG\_242\_length\_1787\_cov\_41.040361

ATGAGTGCTTTAAAATGCAACGCCTCTGGGCTTGACTCAGGCAAGGCACAGGCTTCT  
GCACATTGACTGAGAAACGCAGCTTCCATGTGATGCTCGATCTGGATGAGCAGCTGA  
TCGATGTTGGCGATTGCCTTGTCAAAGCGGGAATACTTCTTGAAGAAATAGGCAAGC  
GAGGGAAGCGAGTGGCGAACATCACGCATCTCATCGCCGAAGAAGTGACGATGCCC  
ATCGGTGCCACGCTTCCAGCTGGGAAGTGC GCGGAAGCCGCCGAAATCCAGGAACT  
GCGCGTTCGATGTGATGTTGTCGCTTGTGCGGGCGTCCGGTCCAGAGGCGATGCGCGC  
GACTTGCGGCAATCTGCTCGGCAAGGCGCAGGTAGAGCTCAGACAAATCAACGCCT  
AGGCCATTGGGATTGCCGGCATCGAGCTGCGCGTGTTTCGTGCGCAAAGTGGATGGC  
ATCTTTGACCCGCAGGCTATCTTGAAATTGATCGCTGTTTGCCTGATGTTCCG  
AAATACAAGCTGCGCTCGAAGTGCGCCAAGCGCAGGAAAGCAGGCCTGATCAGAAT  
GGCGCACCGCTCCGGCTCGTCGGCATCGGTGCGTGCTAGGGAGAAGCCGGCATCAA  
TGATGGCAACGATGGGGACTGCCCCGTGGGGCAGTTCTGCGTTGAGGATCTCGCTGG  
CGACTGCCTCGCGAATGGCATCGTAAAGATAGAGACACCCATGCGAGTGTGACCAA  
TCATGGGCCTTAGAGACCAGTGGCGTGGGGCCGGTTCCCTTGGCGATGAGCATGCCA  
TCGGAGCCACAGCGGCCACTCCCTCCGTGGATTGCCCCACCGCTCCCACCATAGCGA  
TCAGCGCCCAGTGTCTGTCCGCCGAAGCTGCTGGCAACGCAGTGAGCTTCGATAGA  
GGTCACGGCAAAGCGCTCAAGCAAGGACGCTGAAATGCGTGCCCGAGTTGGCGTGT  
CGTGGATGGGTATGCCTAAGTCATGAAACCAGCGCTCATTGAGCCAGAGCAAATAA  
GCATCCGGCAGTCTTCCCACTGGAAAGGGCACGAGCATTGAGGTGCTCACGCTGGC  
AAGGTTCAACAGGTTGGGGTCGTTCTTGTATCCATGTCCCAGTAGTCATTGGGCAT  
TTCGCTTCCTTGTTTTCGCAACTGTTGTGACTTAGCGTTTGATCGGCTTTGGTGATGC

TACCAACCTGACGGCAATTCGTCCTGCTGCTGCTTTGATTTCCGGAGACCACGGGAG  
ACCACTTCTGCATGGACAGTCAGCGTAAAAAGGGACACACGGCATTGCCATAATCA  
GATTTGTACAGGTCTTATTCATTATTTTGTATAATTATTATTTATACGTAAAAAGAGC  
CATGGTTGATCCAACTTTGGCGAAAACAAATCAAAAGAAAATTAAAGAGCAAGAGC  
GCACTTATGGTTTCTGCTTTGCAGAAACCGTGCGCCAACGCTGCGCGTTGGTGCGGT  
GGCTTTCGCCACCTCGTTGCCTATGCTTCGCTAGGCAACACGGCCTCTTCAAAACCTT  
GTGATCAAGGTCTTTCTGCTGTCGAGTTCGCTTTTCTCTCGACAAGGAATGTTGTGCC  
GCTTGTTTGTGTGCTCCACAAACAGGAGTTTCACAAATGGCGATTTATCACGCAACA  
ATGAAGTCTTTTCAGTCGAGGCAACGGCGACTCTTCGGTCGCAGCAGCTGCTTACCGC  
GCAGGGTTTGATCTGCTCGATATGAGCACAGGGCTTGGCCACAATTATTCCCACCGA  
GGCGGTGTCGATTTCCATCAGATGCTTG

>CONTIG\_243\_length\_1774\_cov\_14.357620

ATCGCAAGCACGCCGACCAGGCACGCGGCACAGGCGTTGCGTCGTTTACGCAGGCA  
CAGGCACGCCGTACGCCGGCCAGGAGCCGGCCACCAGGTCGCGCACGGGCAATGC  
CCACCCAGCGGCACATCGCGCCACGGGCGACCCACCAGGCGGCGCGCAGAGCGCCG  
TGCAGCACATCTCCGACATCCTCGCCCTGTTCAAGTAGCCGTCGCCGGCAGGCTCGC  
CCCTGCCAGTAGCCGCAAAAACAGGCACCCGCGCCGGCAAATCTGCCGCGCACAGG  
CAGGTTAACGCCCCCTGCGGGGACATCGATCACCGAGCCGACCCCTTCAACGGACAT  
GCCCCGCGCGAAGTTGTCCACCGTCGCGGGGGATAACCCTGTGGGGAAGTAGCGCT  
ATTTGTCACCCTTAAATGGCAGGCCAACCAGTCAACCTATGGTTGAAAGCACAGTCA  
GTAGAGCGCTCAACAGCAGATCGGCGTCGCCGCCGCTGCGCGGCGCCGACAACGTT  
AGAAACCTTATCCAGTTGCGGGGGCTGCGCCCCCTGTCCTCCCTCCACGCCTACGG  
CGCTCCGGTCGCAACTTCGACCCCCCGGAGAGGGGGCGCATCCGCCCTCTCCCACCG  
GCACTGCCACACTTCCACACGACCAGGACGCAACCGAGGCAGTGCCGGCGGGCGCC  
CTCACCCCAAAGCGGGTCAGCAGGGGATGATTGATAGGGCGTTGGCGTGATCACA  
GCCCTGTACCCGTGATCGAGCTTCGGCCAGAACCAGGGCACAGCGTCGCCAGGGGC  
TAGGCGCAGCGATCGACCAGGCGCAATTGCCCCTGGAACGCATACGAGCCGGGCAT  
TTCACCATGTAAAAGCGGCCGGGTAGCCGGCGAAACGTAAGCGCGGCAAGGGCTGC  
GGCGATTGGCTCAGGTTTTGCTAACACTAGCCGATATCGCTTGCTTTCTGAACGAGA  
CTAGGTTAACGTAGCGTTAGATGAAACACGAAAAGGCCAACCCTGGCAGGCGGGT  
AGCCTTAGAAATTTTATTTAGCTGGATGGTCCAGCGAAGCGTTGTTGCGTAGAGCGT  
TCCCGGTCGTCTATGCAGTCTTACATAGCAGCAAAATTGCGTTGGATTTCGTGGGATG  
TCGTGAAGAAGCATGCCGCGCAGTATAACTCAATTTTCGTAACAAGGGTGTTAGTTGT  
GGTTGTTTCGTGCAATTCAACGAAACACCTGCTGTGGACAGCGCTCCCCCCTGACC  
GGGGAAGGAGCAGATTATGAATTGCGTCACTTGTGCTTGGCCAAAGCCTGTACATGT  
GCGCCGTTACTGGCGCTTCCGCTTTCAGCGGTGGGAATCAGTACGGATGCATTGCAG  
GTCTTACCCTAACCGGTAAGTGATACACAGCGGCGTCGGGCAACCGGCGCCGTTTTT  
TTTTGGCTTGCACTTGACCAGGTGCACCCCGCGCCGCGCGTCAGCGCCGACCCCGCC  
CAGCTCGACACCCACGCCGATGCCTAGGCGCGGCGCAGTCGTGTGTGTGTACGCCTC

GCCGAGTCCGCCGGCTGCGATCAGACACGGATCGACGAACGGCATGCAATCAACTG  
CAAACTCACTTGCACGGTAAGAAGAATAGTATTATTCTTCTTACCAACTAGGC  
CGCAGGAACCGCACATGGACCCGTCCCAAGACGCACGTGATCGCATCTTCAAGGCT  
GCTGATGCGCTGTATGACCAGGCCGGGCGTGAGGTCTTCCCGACCGTCGATGCCGTG  
CGCAAGGCGGCTAAGGTCAACA

>CONTIG\_244\_length\_1771\_cov\_64.306569

GAAGACCAGCTTCGATCAAGAACTCAACGACCTCGGCATGGTTGTTCTCGGCTGCCG  
CTGCCAAGCCATGCAGCGCACATTGGATCTTCGATGAAAAAGGCAACAAATGCTTG  
ACCGCTTCCAAGTGGCCTTCCCGACAAGCCGCGATCAGCGCTCGACTGCCCTGCGCC  
TTGGCATCTGAGAACAGGACCAATTGAAAGACCACATCCGCATGACCATGACGTGC  
TGCCTCATAACAGCGCAAGTGAGTCGTGTTGCAGAGGGCTGCACTCTTTGAGCAGGCG  
TTTGACGCACTCGGTGTGCCCCTGTCCTGGCAGCAAGCACGAGGGGCTTCGTCATCCTC  
AGCCTCGCAAAACGCCATGAGCTGCTCAACTGCCCCGCACCGAACCCGCCTTGACAG  
CCACATCAAGCGGATAGACCGCAAAAGACTTCGACAATAGTGGCACCAGTTGATCA  
ACCAAGCTTTCTTTGCCGCTCGTGATCGCCACATCAATGGCGTAGCGTGCTGCAGCA  
TCGATGTCACCCTGAGCCTGACAAAGCGACTGCACATATGCCTCGCTTCCCCGCTTC  
ACTGCCTGTCTAATACTCTTTCTAATTGCCTGTTCCATTTTCGTCTCCTTTCCATTCAAT  
CTAAGGCCATCACGCCTTTCGTCAAGATCAACGCGTGATGGCACCCATCGATTAGAT  
AGGCCGAACTGAACTCACAAATCGTCGATGTCAGGAACATGGTCCTCGTAGTCAC  
ACGCAATGAGCGTGCCGGCTTCGTCTCGATACGTTTCGATCGCAAGGTCCTGACCC  
ATTGTTTCGAACTCGAAGTCACTCTCGGCCACCGCATCGATATCGCACTTGGAAGTG  
CTTCTTGGGGCGAATTCGCTTCAATCGTTGCCCAGTGGACGACTTGGACGGTGCCGT  
TGATCTCGATGGTGTATTTTCATCTTGCTCTCCGTGCTTGGCGACGTGCCAAGCTTCGG  
AACGCAATCTATGCATCGCAGCCGCATCGCTAAAGGACGAAATCGCCAAGATCCCT  
GAACATCCATTCATCCGCCGCCGATAACGCCAGCGCCTGGATGCACCAGGCAGCCA  
ATACGTAGGCGCTAAACGGGCTTCGTGTCTTCTTCTAACTCTTGCGCATCCAGCCAT  
GCCATCTTGATGCATAGACCGTCATCAGATGAGAGCGGTAGGCATTTTCGCCAATGC  
TTTTTCTCGGCATTTGACCGCCAAGGCAGCGCCAAGGCTTGATCGATGGTCAGGGCC  
AAGATCGTTGCGCCTTGCTGGAAAGCTTCTTCGATCACACTCATGTCGAGCACCGTG  
ATGCCCGCATGTGAGATCACGCTCTTGATCTTGCCGGCCGACGCGCGGATCACAATG  
AAGGGGATGCCCTTCCGCGTTCGACCGAAGTTGCCCGAAATCGGTTCTCGGATCTGT  
TCTTGAGCTTTGGTGACTTGGGCATACCACGTCAAGAGTTCTACCTTAGCAATCGAG  
CGTGGCGTGCTCTTGCCGATCAGAAACGGATTGCCGTGCTCACGCTTGAATTGGTCG  
AATTGGCGTCTCGGGATGCCGAGGTAGAACTCCGCCATGGCTTGCGTGAAGCGCGTT  
GTGCCCGGGGATTGATCAAGTATCTTTCGTAGACTGACGAAGTCTCTTGAATCGATG  
ATGGCCTTGCGCTCATCACTCGTCGCGATGACTTCAAGTGCTGCACGGAAAAATCCG  
TCTTCGAAACTTTCCGCCTTGCTGATATTGGTCATCCAAACCGTCCTTCGTTCAAGTC  
TCACTGC

>CONTIG\_245\_length\_1761\_cov\_97.140759

ATGCTTCCTTGGTGTAGGGTCACGCTCTGCAGCTGATCGTCACGAAGGATGCCCCGCG  
CGCTTGGCTTCGACGGTGGCGTGCATTGCAACCTCATCAGAGATGCCCTCTGGCAGC  
TTGCTGTGAATCGATCGATACAGAGGGTCGTTTGAGACCATCGCAGGTGCAGGTGCA  
GGTGCAGGCGCAACGCAGTGCTCCAACGACCCACCAATTGGCATCTTCCAGCCCCG  
TGGCACATACGCTGGCGCATCCTCGCTTTGCATGCGCTGCTGCACCTCCTGCCACCG  
TGTCGCAGCCATTTCCGTGCGTCCAGCACCTGGGGGAAGCGGATCGCGCAGGTGAT  
CGATGCCATCCGCCAGGCTCATCCCTTGGATAACTCTCGCATTGAAGGTACGCCCA  
TCCTCAACGTCTCAACATCACCGCGATACTTGTGATCGTCGGCGCATGTTGCCGGG  
CCAGCAGCTGCGTTTGAGGGTCTTCCAACACCGAGCGGTCCGGCTTGCCGTTGGCGT  
CCAACGGCAGGAAGTTGTGGATCCGATGCGAATCTCCTAAGTCCGTTGCGACCATCG  
GATTGCGTGCATCCAAAAGACTGCTGTGCTTGGCGTAACCAGCCCTATCCAACGCAG  
TGATCTCATGCGACGCGGCGTATACCTTCACCTGCCCATAGTGCTTACTTGCAGCAC  
TCACGGCATCGCCTGCCATCACGTGATTGATCACGTCGGTGCCACCTTCCGGAATGC  
GCCGGTCCAGGCTGACCGCGCCATAGGCGTTAAAGGTCTCTCCCTTGAGGCCGAAGT  
GGTGGGCAGTGACCTGGGCGAGGTTGCCGCCAGAGAATGACCGGTGACGGTGACA  
TCGGGAGCAGGTTGGCCGGTCTTGAGGTGCTTTTGTTCTGCGTACTTCAATGCATTCT  
GAGTCAATTCGATCGCATCATCGACCTGACGATTGTGACGTGCTGCAACCATGCCAC  
CGTCAGCATAAGCACCATCCTGTTTCGGCTGACGATCAAACCTCGGTACCGCGATGAG  
CGACGATAATTTCCGCCGGTTTCTATTTTCTCGTAGATAATTCCCTGATAGCCGGACGG  
GCGATCCATATATTCCAGACGCCTGAACGAGACGCCGCCGATCTTTACTGGCGTACT  
GTCGGGCCCCGGTTTTGCCGGGTGCGCGCATATACATCATTTGCGAGAAAGGCATTTTG  
CTGTTCCGGTCAGGCTCATTTGGACACCTTCTCAGACTTTAGCGTGACCTTAAATAAA  
CTTCCGCGATTTGACTCAGCATATTTATCCACACTATATTCACCAGTGTCGGGATAGT  
TATCCATCTGGCTTCGCGGATAGCCTCCTTTCCAAAAATAAAATTTAACGGGTACTG  
AATCGTATATTTGCGCTTTAAAGAGCGCCGGCTGGAAACGCGTCTCCTCTTTTTTGCC  
GGTCGCCTTCAGCGAGATACCAACGCCATTGAGTTCAAAATTACACACACCCTTTCC  
GTAATAATCCGCATCGATCATGCCATCTGCATAGATCGTCGCGACATATGTCATCGG  
ATTCATCTTTTCAAAATTGATGGGTATCCCATCTTCTTTTGACTTACTCCAAACACCC  
GCAATAGGCTCTATCGGCGTGCAATTGCTCATGGTTCGTCATTTGATAAAAGGCGGTG  
CCCGATATCCACTCAAACGGACCCGGCGCATCCTCGATTGTCATGGTGAGCTTGTA  
GCTTCCGTCGGATGTTGATTTTTCCGATAGACCGGGTCTCCATCAGCCG

>CONTIG\_246\_length\_1756\_cov\_5.922652

ATCCAGGTGCCTTTGAGTTCGCGATTTGCGACTACGTTTTGCCAGATGGCTCACCAG  
GGCCGACGCATTATTTGTGTGACGTCGTTGACAGTTGGCTGCGCTAGACAAGCCGC  
GTTCCAAATACAAAGTCACCTTGGCACATGACCACGAGACGGGCAAGGATGTGGAA  
ATGCTGAGCGTAACCGGTGGAGCCGAACTCGCTTTTCTGCCAGAGGTTGTTGGGTCA  
GCCCACATCTTTCGAATGAGTGAAAGGCCCTCGATTGTGGTATGCGATGCGTTCTTG  
AAGAACGAAACCCGAAAAGCAGGTATCGGTGTCAAGCCGAGTTCTGACGGGCTTTT  
GTTACCCGACGCCGCGACCTATTGATCGCTCAGTTCATTTTTATCGTGCAATAGCCG

GAGCGTAATGGACTATGGCCAAGAACGATAAGCCCGTTTTTCAGGGTCACCATCTCA  
TCGAGCAAGTCGCTTTTAAAGAAAGCGATTTGCTACAAGAGCTTTCGAAGAATTCGC  
TCTTTGATCTCCACGGAGATCGAAATATGCTTAACCTTCCAGCGGACAAAGCTTTGG  
CTTTGAAGCTGGACGTGTCGCCTCACAATGGCGGCCCCATTGGGGGCGTATTCGATTG  
GTTTGAACGATGCATTGCAAGAGTTAGAAGACAGTCCAGATGGTCAGGCTTACTTGA  
GAAAAGGAGATCTGCAAGCAGGTCAGCGCTTGGCAGCAGAAACCGACCGGCTGTGT  
GCCACCCTGAAGGTAGGCATGGTCAATGGTCATCTACTGACCAACACCCCTGACGG  
GATGACATCAGAGGCGGCAAATAAGCACAAACGAAAAGTTCTTCAGTGATATTCAGA  
GCTACCAGCAAAAGCACGCTCTCCAGATCAGTGAGTTTCGACAAGCTAACAGGAGCC  
GAGGCTCGTTGGCCTGCGGTCCTAAAGTCCGAATCAAATCTCGTCGCAAGCCTTCAA  
GCAATCGATCAGCCTGGCTTTAAAGCGGTAAAAGGTAATGCAGCTCTTGTTTACAG  
GGGCTTGGCGACTCCATCGAGCAGACTCAAACCAAAGGGGGTCTTCCTTTGTCTGAG  
TCTGGCACCAAGGCGGTTCGAGCAGGCTTTTCCTCGCTCAATGCGCGGCGCGGTCTCT  
CCAGAGCTGTTGTATGGGAATTTGTCTGCTGGGCAGGCACTTCGCGTAACGGGCTTG  
CTGGCATCGGCGACCGATGCGATTGGGACCAGTCAGCGGGTGAGCACGTTGCTCGC  
GCAGGACAACCTGCTGGGCGCTAAGCACGAGTTGCGCAACTACGCCGCTAACAACG  
CAAGCGCCTGGGCCGGTGCTTGGGCCGGAGCGGAGATTGGCGCAGTAGGTGGCCCA  
GTTGGCGTTGCCGTTGGTGGCGCAGTGGGCGGCGTTGCTGGTTACGTCGTGTCTGAC  
AAGATAATGGCGACCCTGGATGAGCGTGAGATTACGCATCAAGTGGACTCCCTGGG  
CAGGCAGTGGAGCTTCAACGGGCGGCAATGGGTGCAGCCAATGGCTGCTGATCTTC  
GCGCCGATGGAATTGACCATCCGCAGCAGACAACCTTTTCGGCAGACTTCGATACCC  
GACGTGAGTTGGACTACCGAGCCGCCAATACGTCTGTCTGAACTTGCGATGAGCCGG  
ATGCCGCCGCCGCGTAGCCCATACAACCTTGGAAGCCAGCAGCACTGATCTACCAAG  
CTTGTTGCCAGCGAACTGGACGCGTGACGCCGATACTGGTCAGTGGCAGCGCACCC  
GCG

>CONTIG\_247\_length\_1753\_cov\_60.329028

GTTGAGGGAACGACGCATGCAAAGCCGAGACGACGACTTGGACGCGCTCCTGGCGC  
GCCTGACCGGCACCGAACGTCCGCAGGAGTTGACGCTGAATCGAACGCGCTCGCCG  
GATGGGTCGATACCGAGCAATGGCAGATCGACTCCCCTGAGGACGTACGCTTTA  
CCAGCAACTTATGGCGCTCACGGCCCCGCAGCCCAGCGCGTTGGGAGAGTTGATTC  
ATCAGCACGTGCCGCCTCTCCCGACGCCACGGCGGACGACGAAGACCGCCATAGAG  
ACGATCACCTTGGGCAAGGCCCGCGATGCTTGGCTGACCAGCCTCAAGGGCAGCAC  
CTTGCCCAAGACCTGGACCATCAAGCGGACCGCTGTCTGAACTGCTGACCAGCTTCCT  
GGGTGAGAAGACCAAGCTGCACACGGTCACCCGCTCGGACCTGGCCCCGGTGGTATC  
AGGACATGCGGGACAAAGGCGCTTCAACGCCGACGCTCACCAACAAGCAGTCCTAC  
ATCGGCGGCAAAGGCGGCTTTTTCGAATGGGCCCAAGCCTCCGGCCACTACCCTCGT  
GGCGACAACCCCGCCTCCGGGCACGTGAGCTATTCGACCCGGGAAAAGCGCGCTCG  
GCGGAAGTTCGGGTTCAAGGCTTACGACGCCACCAAGTCCAAGCGCTGTTTGCCCC  
GGCTGCTTTTGAGGCGCTGCCCCTGGCCGCGCGGTGGGCTTCCTCATTGGCTTGAT

ACCGGCGCCCGCGCTTCGGAGGTCGGCCAGCTGCTGACTGCCGACGTAGTGGAAGA  
GGGCGGTATCCCTTGCTTCCAGATTTTCGGACGAGGGCGAGCATCAGAAGGTGAAGA  
CCGACAAGAGCTTGAGGACCGTGCCGATTCACCCCGACCTCCTCGCCCTGGGCTTTC  
TCGACTGGGTTCGAGCAGGCGCGCGCCGAGGGGCGAGGAGCGTTTGTTCCTGCGGCC  
AAAGCCGATGCCAAAAATGGTCAAGGCAACTGGATTTCCAAAGCGTTTAGCCGGCA  
CCTGGCCGAGGTGGGCAAGAACTGGCCACGGCCAAGCGCGGCTTTCCTCGCTGC  
GCAAAACCCTGATCCAGGAGTTGCAGGGCGCGGGCGTGGTTTCCGAGCTCCGGGCA  
CAGTTGGTCGGCCACGAATTGGATGACGAGCACCGTCACCTACAGCCGAGCGTT  
CACAGCTCAGGAGAAGCTAAACGGGCTCCGGGGAGTATCGCCTGGGCTATCGGTGC  
TGGCTTATGGCCTCAGCCTGGACGCGCTGCGCTCCCTTGTCGCCCTCAACCCTCACC  
CTGTTGGGAATTTGCCTAAGAGCTCTCGCTTGAACGAGAAGCGATACGGTCATTAGC  
GCCTAGACCATTACTCGAAGCGCCGGCGAAGCCAGATCCAACAACCAATACATCCA  
GCTAGGAGAGCAACGTGGCCAAGATCGAATTCGAGGAAAAGGAATACGAGACAGC  
ACTTTATAGGGAGCTGCGAACAGCTAAGAATCGTCTCTGGTCGCCCCGGGCGAGGTGCT  
AGAGGAAGTGCTTGGATTCGATTACTCGGTTTACAACAAGAACCCCAAGTTTTGGAA  
AAAGCTTGGGGTAAGTCGTCCGAAAGGCCTAAAGCTGAGCACCGCCTACCCGACGT  
CCCCCACCCTGAGTAGTGGCTTGGTTTAGAGTCCGGGGGTAATGATATCGGTGTTT  
GCCAGATGTTGGGCATACGCAGCCGGGGTCATGCCGCAGATTGCTTTTTTGGGTCGG  
TCCTCG

>CONTIG\_248\_length\_1736\_cov\_181.635177

CGCGCGGCTTTGGCTGCGACGTGGAGGCCGCACAGGGCATGTTCGGAGATGTTTCGAT  
CTCGCGCACAGCATCATCAACTTTGAGTTGGAGATGGCTAGCGACGGACAGCTGCTG  
ACCGCGGCGAAGGTGAAGCAAATCCAGACGTTTCGCGGCCGGCCTGGGCGAGGAGAT  
GGACGACTCGGGCCGCGAGACGGTCAAGGCGCTCCTAGAAAACCCGGCGCTCCCGA  
GCGCGCTGCGCGACGTGCTGACGCTGCGCTTGGACGCGAGCCGGGCGCCGAAGAAG  
CACGGCGCGATCTTACGTGCGCACGTCAATGGGCGTATGCAACATAGCACCGTCTAC  
CACGGCGCGCTATCCGGGCGATCCACAGCGATGGGCTGCGGCGAAGCGCAGCTGTT  
GAACGTGGCGCGCCACGCCCCGGCCACAAGTGGCAGACGTGTGAGAGCTATCTGG  
ACGCGGCGAAGCGGCGCGACTTCGACTTCCTGTGCAGCCCAGAGGTCGGGCGCCG  
CTCGCCGCGCTCGCCGACGCACAACGCCCCGCTGTTCTGTGCCACGGAGCCTGATCAC  
GTGCTAGTCGTAGCAGATTTGACCGGTATTGAAGCGCGCTTAGGGCCGTGGTGCGCA  
GGCGATGAGCAGCTGTTGGTTCGAAGCCGAAGACGGGACGGACGGCTACGTAGTCGA  
AGCCATGTCAATTTTCGATCTGCCGGAAGAGCAGATCACCAAAGACTTCCATCGACA  
AATCGGGAACTTTACGGCTACTGTTGCAATTCGGTGGCGGCTATGAGGCACTAGT  
GCGCGGCGCTATGAACTATGGCATGCACATCGAAGATGACTTAGCGCAGCGGGTCG  
TCTGGACTTATCGGTCTAACCGTCCGCGTATGTCAACGTGGTGGTCGCTGCTTGAGTT  
TGCAGTCTTGATCGCCTTGGATCAGACCGGCCGGCGCGTTGATGTGCCGATCGGTGC  
CGGCATGTGCACGAAGGTGACGTTCTGTCAAAGACGCAGTCGCGTTGCGCATGGAGC  
TGCCAGCGGCCGGGCGATCAGCTACCACAACGCGCGCCTGATCCTCGAACCTGGC

GCATCCGCCCCGATGGCCGTCTACGACAAGCCCCGAAGGCTACGTTCGAGACGCTAGACCGGAAGATCCTGTCTGAATAACATGGTGCAGGGCCTAGCCCCGCGATCTGTTCTGGGAGCGATGCTGGACGTCGCGCCGGCCGAGAAGATTGTGCACCACGTCTATGACGAGATGATCTTGGAAGTCCCCGGCCGGGCGCGCCGAGCTGCGACTGCAGCAGCTGATCGAACGGTTGCGCCAGGCCCCGCGATGGGCGCCAGGGCTACCGCTCAATGCCGAAGGGTTCGTTTCGCTGCGCTGGCGCAAATAGTGTTGACAACTGTGTAACGGTGTGGGATTCTATCCACACCCACTCACTGAGACGCAGACGATGAACAACTACCGCCTACATTTTCGTAGCTACAAAGGTAAAGGACGCGACATCGCTTTCACGATCACCATCGAGGCCGCGAGCTGCCTCGACGCAAACACAGTCGGTCATCGAATGGGAGATTCAATTGGGCTGTAGCTTCGCAGGTGCCTGGCAGATCATACCGTAACCATGTGGGTTCGTTGCTCTCGCTGCCAGGCGCGCCGCTCGCTTAAGTACGCGCCTGACACTTACCAGCGCCTGCCGTGCTGCCGACCTACGGATGTACGGCCGCGCGCCTGCGCACCGGCAAGCG

>CONTIG\_249\_length\_1735\_cov\_13.801617

GTGATGGATGGCCATGTGTGTTTCCTGAGTCAGAGTTCATCAGTTCTGACTCAAGATTTCGCAAAGATCAATAGCTTAAAACGCCTATTTCCGAGAATTCTATTTTGCCTCTTATGGAATTAGGCCAAACTTCGATCGACCTCAAAAATCTGCCCCAAGCTCACGAAAGGCGAGATGGATGGCAAAGCTCAGCACTCCATTTAGTAAATCGCCTCACTGCTCCACGAGGTGCCTCGCCCATGAACTCCCCATTTCATGCCAAAGGCAAACCTTGTCGGCATCGCCCATCGGTCCGGGATGCCACCGACCAGCACGACACCTAAGGGTGTACCGACAACGAGGCCGTTTCCAAGGTTTGGGGTCCCGGCACGGCTCCCTGAGGCACGGCCGGGAACC AAGCAAACGGCTCAGCCAGCGTCAGGAAAGGCGGCATACCTTGGACCACCTTGAAGACCGTCCCGACACGATCTCCTTGCAGCATCACGAAACAGGGGGTGGGATCACTAGGATCCGCTTGTTATCGACGAGCAGAGCCCAAGCTTCCCGAAACAGAAAAATGCTCCCGGCGAAAGATCCTGCGGGATTGCTCTGCAAATGCCTCTGCGGGAAAAGTCATGTGCACCTCGACTTTGAACTGATGAGATCAGCTATTCCAACGACGACGCAGGAGCA CAACCAAGTCTTCGACCATGCGCTGCGCATCCATGGATAGCGATTGCCTGACTCGATGGGCTGGTGAAAGGAGCACGGGGGCTTGGTGCTCACCTTGCCGGTAAGGCACCTGCATGTTGTTGGGACTGGCCTCGTGCTCGGCGCGGGTCATCCAAGCACCAGCGTGCTCTCCCAACAATCGCACCGCAGGAACGACATGGCTAAGCCGTTTCGGTTGGATCAATATGAGCCAGGAGCCAGGCGGCGTAACCTGATCGCAGATTCCAGCTTTCGGGCGATATCTTCTTCTACGACGACCGATAGCCACATACCGCGCTCTGGTAGCGGAACAGGCAAGCTGATCAGCAGATCCCCGTTGGGCCAAAGTCGGATCGACGCGCCGTCCTACTACGCTGCGCTTCTTGACCAACGCGAGCGCCTCACCGTTCAAGCCCGCCTTCATCCCCAGGCTCCGATCAAAAACGGCTGGGGTTCCAAGAGTGCATGCTGTTGCATGGCATCAAGGAGGGGCTGGGCTTCAATCTCGGCAGGACGAAGCACCGTTGTGTGCGGTCCAGCCGCAACGGCAAGCTGCAAGACCGTGCCACTTTGGTGATAGCCGCGCTCAATTCGAGGGAAGAGCGTCAGTGACGGTCGCGCAGTCCTGCTGGATCAAGGGGCGCCACGGCTCGCGTTAGCTCAAACCGGTGAATGCCGCGCGTGACCTTTTGACCCAGATCGCTTGCGGAGGCAAAGCCATCCCATAGCTGCCACCTTGCCATTTGCCGATTTCTTCAATCAGCGCCACCTGAT

CCTGTTCCGCGTCCACGCCGACTGCACGAACATCAGAAGTGGCTTGCGGCTCCGGG  
CCTCATGCACCTCTTCGTGCGTTGCTGAAACGCCTCCTGCCTGCTTGGTCCCGTAGCG  
CGGCCCAAGAACGAGGATGACAAGATCCGCATCGCGCACGCCACTCAGACATGCGA  
CTTGGGGAGAGCTGGCTCGGGCGCCGAAATCCTCCGCCATGATGGCTTGATGACCG  
AGAAGCTCGATGGCCTGCTTGACTGCCGCACGCTCGGCT

>CONTIG\_250\_length\_1734\_cov\_14.082141

CCCTAGCCGTCCTACCACTGTGGCGCGACCGATTAGCCATCGCTTTGCCTGCTCGGT  
CACCCTGCTGGCACAGCATGCTATTTTATTACAGGTATCACTCAGTTACCCCCTGA  
TTTGTTGGCATCCGAATCCTTGTGTTGAAGGGCTTGATACGGAGGCAGAAACGGATG  
ATGGAAGCGCTCATCTATGCCGCATTGCAGTCACATCCTTCGATCTTCTGACGGTAC  
TCGTTGCGGCTGGCTATGGCATCGGTATTGCGCCGCAGAGCTACATAGTCAGTGCCC  
GCAATCGAGGTATCGTCATGCGTCAGATCCTCGGCACTCCTCGATGGGTTTACACCT  
GTCTTTTTTCGATCGGCAAATGCTCTATCACCTGCAGTTGAAAGGTTTGTGAGCGAG  
CGTCACGGGTAGCAATATCCACGGAAAACAAGCGTTTCAGGTGAAAACCTGGAGCGG  
GATTTTGATAGACCGTTTATGGCGTTGTCGTGCATCGCTGCTATCGGCAAAAAAGAG  
TCTACAGAGAGGGCACAGTCGGCCGCTGCCGAGCTTCTTGCTCCGGAATCTGGTGTG  
GAGGCTGCTGCGCGCGCTCCGTTACCGACTCACTGCTTTGCAGTTTTTCGCACCTTTTC  
GAAAGATTGCTCAACTGGCGTCTGTATCGCCTCCTGAGTCGACATGTATGCGCGCAG  
GGTCGCAGGGTTGTCTGAAGCGCCCTGCTGAATGAAGATTTTTTCGCCGGGCGCGGC  
GGCATTGGTCTGCTTGCTCAGTGCGATTTTCGTCAACGCCACTGAAGTTGTTTTGCTTG  
GCGAGCGCATACACGCTGGCGCTAATGCGGGCGCTGTCTGCAGCTTGCACGTGACC  
GGAATTTTTTAGTCCTTCGATCTTCTCGCGTATCTGCTGCATCAAAGCGTGATCCGGA  
TGACCCTGGCGTATTGGATCGTTGGCCGGGGTACGCTCTAGCTCCCGGTTCTGGGCT  
GGTTGCTCGCGGTAGCGCAGTTTCTCTATACGTTTCTGACAGCATACGGTTGCCA  
AGGCCCCGGCTCGACCCTGTCAGGGAAACCCTCTACCGGTAAACTCATCAATTCGCCA  
AAGGTTTCGGAAGGCGGAATTGCTATTAACGGTGTACCAAACACCTTGAAGCCATA  
CTTGGGATAGTTTCAGATTCAGTGCGTTGAGTTCTGGCATCGCTTTAACTGCAGTGTTT  
CAACGCGCTAGGATCTCATCCTTATCGCCGATGACGACGGTGCGTGATTGCTGGTTA  
TCCTCAATGAAGGTACTTCGACTCACGTCCGTGCCAACTGAGGCTGCATAGGCACCA  
TCGAGCGCAAGGTTCCAAGCACGAAGGGAATGCCTAGCCTCGTCAGTACCTATTGTG  
AGTGCTTCGCCGTTTGTGATCAGTGGCCAGGCCGTGTCACTCAGCTAGAGCTTTA  
CCCTGCTCATCGCGCAAAACCCAGAAATCATGTCCAGCTACACCAAGAACATTGAG  
TGATCTTGCTTCAATCGTATACTTCGGCATGCTCTGTTTAATCCATGAATGCTTTGCT  
ATTGCTACTTGCTAGAGACGCACGAGTCTAGCAAGCCCTTAAGGTTGTTTCATCGCCT  
GTGCCACCCCTAGGGAAGGTCTGAATAACGAGGCCTGAGAGTGCGGGATGTGCGGT  
CGGTCCGGAGAGTCGCGTTTGGATCTTCGGATCTTCCGCCATTTCTGGCACTTTCCTT  
GGGAATTCCCCGGGTACAGGCG

>CONTIG\_251\_length\_1712\_cov\_7.155205

CGAATCCTTGGATTAGGCGCCATGCGAACGCGTGAATAGTCGAGACTTCCACTAGTG  
GATCAAACCTCTAGCCTCCGAAGAATCTCGTCGCAGGCTGCGTTTGTGTAGGTGATCA  
CCGCAATGCGCCGACCCTCGAACGTCAGGCGTTCTCGCTCGCGACTTTTGAGTTCGC  
GGATAGCCTCGACGAGTGAGTGGGTTTTTCCTGAGCCAGCACCTGCGTAAAGAAAA  
AAACTCTTTGGGTCTGCCAGATTCAGGCAAGCCTGCATAACGATGTCCGCATCTGCA  
GCAGCTGCTTCGCTCACGGCGTCACCTCCGCGCCCTCGGGCGGAATTACCAACAGCT  
CTTTTTGTTTGCTTCGCAATTTGGACTCAAGCCAGTTGAGGCCGTCACTGATGTATAC  
AGGGATTTTCGAGGTTGGAAAAGTCTTTATCCCCCAAACGAGCAGCACAAACTCTG  
CTTTCTTTCCTTCGCGTAGTTCGTTGAAAAACCCTTCCCCGACGGCTTCAGATGTTTG  
CGATTCATTTAAAACTTTAACGAAAGCCTTCATCAGACCAGTGCTCCCTACCTTTTGT  
GCAAAGTGACGGACGTTGCTAAGCACAAAGCTGTCTTCAAAGGTATTTGGAAGTGC  
TTGTATTGCTTCACCAGTAGCGGGTAGGTGGGTGGAAATAGGAGTTTGATATGCGAT  
GCGTACCGAGTACAGGTTCGTCGATCTGGTGCTCTTTTTGATTTCGCTGGCAGCTCAAG  
CAGCTCGTCCACGGTGCTGCCCAGATGCATCAGTTTCATCCAGCTCCGCAATGTGGG  
ATTGTTTCGTAATCTGATCTGCGTTTCTTTGCACGGGTTTTGCAGCTTTATTGAGCCCT  
GCATCGAGGTCTGTAATAACCAGTGTGAGGATGCCAAGGGCGTCAATTAAAGGCCT  
TAGTCGGTGTGCGTGACTGCCACCGATATCGAGGGTTGTGATGTAGCAGCGGTCAAG  
GAATGGAACTTATTCGCAAAAAATGCGGCAGCATCATGCGCTCTGCTGAGCCCTC  
TACCAAGATGACGGCGTCGGCGAAGAAAAATGTCTGCATGCTGTGCCCGCAGGTACC  
TGGTTACGAACTCCTTCGTCTTGTTCCCTCGCCGAACACGTTAGAGAGATTAGAGA  
CCGTCGACACCGGTACACCGATGCCATACATCCCAGCTGGGAGTCGCCTGAAATAC  
CTAAGGTTCTGGTACTCTACTTCATGAGTTACATGACTGGAGTGCGTGCTCACCAAA  
AGCTGAGTCTTCAGATTTGGGTAGCGTTCAAGCAAAGCATCCCGGCATAGAACTTGG  
TAGGCGTGCCGTACGAAAACCTTGTTGCACTTGAACATGAAGGTGGGCTTCAGGCTCC  
TCAATGAGCACGAGGTGGATGGGCTCGACGCGGTCTATTGCTTCCGTGTTTGCGGCC  
CTGGTTTTTCTCAGCCACTCGTCCCTGAAACCCATAAGCCGGAAAAATCATAGATATC  
AGGTTTTGATATCCCAACCCGTTAGCGGTCTCTGGTAAATGAAGAGGAGGGGCTCCT  
GGGGCTCCTTCGATTGAATCCAACCTCAAAAAGGACGGCCGCTTCATGGTTCATGCCG  
TCAGTTGTTGCCAGGCGACTTGCGACTTTGATGCGTGGGTTCATTGCGGCCGGGGTAG  
CCCAATCCCTCGACCTCTCTAATAGCAGGTTTCAAGCTGCTACCTAGCTTCGTATCG  
AATG

>CONTIG\_252\_length\_1702\_cov\_22.011429

AGGACACCGGCAACATGTCCGGCACCAACCAACCCCGTTCCAGGCCAGTACACGAAG  
GCCGAGCCGATCCGCAAGCGCGTCAACCCCGCAATGGCGTCAAGCTGTCCAGCAG  
CAGCTACGCCCACCCGTGGGACGGTCGCCCGCAATACTGGTCAAGCTACGCTTGATT  
TATCCTAGTGAGGCAAGCCGCCGAGTTGTTACCCCTTGGAGTCGTCACGATGAAAT  
CTCGCCACTCGCTTCTGTACGCCATCCGGCACTATTCGTATTCTGGTCCTGAGCTG  
CGCACTTGTCGGCATTGGCATCTACGGCCTTGCGACCTTTGAGCCGGCCGCACCCAA  
TGCGGCATTTAGCAGTCCAATCAGCGACAACGCGTGGGTGATCTACCTGGTCGGCGT

TGTTTGCGGTCTGGGGGGGCTTTTCTGGATCGCGTACAGGTCCCGCTAATGCCACAG  
TAGGAGGCGTCAAGATGGACGAGCAGAAAATGCTGCATATTGCCAACCGCTTGAG  
GCATGCATTGCCACCGCATGGCTCTGCTGGATGTTGTATCTACTCACGTAAAGCTGC  
AGCGGGAGCTTTTTTTAGGCTCACGGTGTGCAATGTTTGTGCACACCGTGAGCCTTG  
CGAAGGAACGACACATGGAATACAGCAGATCCAACCACGGCAACACGCGCACCGG  
CAGCTATCGAACCCCGCATCCAGGCTTGCTGCTGCACGTGCGCAGCCAAGTGGAGTC  
GGGCCGGCCACAATTCGGCGTGCACCTTGGCCAAGCGCGTCGGCGATAACCGCAGGCC  
CGGCGTATTGCACGGTCTATGGTCTGGCCGCGCTCGATGTCTTCATCCTCTCGCCGA  
CAGCCCTGTCCGACAGCCTAGCCGCGCTGGTCAATTGCCGGCGGGCACTACATCCTCA  
CTGCCGAGGCAGCAAGCCAGCTGGCCGCTGACTTCGGGCTGCCTGTGCGTGCGCCG  
GCAGCGATCGAAGGCGCGTAATGCGCCGTATGTCCTTGGATGCATCGCGCTGGCCG  
GCAGCTGGACGCAGCGCAGCGGTGCTTCCACCATTCCCACCCTCCTGCAGGAAACCC  
ACATGCTCATTCTCACCCGCAGCATTGGCGATGCGTTGATGATCGGCGACGAAGTGA  
CCGTGACGGTTTTTGGGTGTCAAAGGCAACCAGGTCCGCATTGGTATTGCCGCCCCGC  
CGCACGTGCCCCGTCCACC CGGAAGAGATCTATGAGCGCATCCAGCGCCAGGACGAT  
CGATCCGAGCCGACGACGTAATACCAACGTGCAAAAGCGCACATCACAAGGTGTG  
CAATATATGTGCACACGGCAGTTGCTTGCGGTTTAAGGACTGCAGGCCGATACTTGG  
CAGCGATATGACAACGCGGGCGGGAGTGCTGCTAGCGCAGTAGACCCCCGAAAAC  
GAAAAAACCGCCCCGGCAAGGGCGGGCTTTTTCTTCACTGGTCTGGCGGGAAAAAAC  
CAGAACGATGGGGCCTAATCGATGCCCCCATCCTAATCCCGCCGGCGAAGCCGTGC  
AAGAGGGAAAGGATGCGAAGGCCCCACAAGCCAAACACCCCGCCCCGCTGCCGTTCA  
TCGGCGCGGGACATGTCAGCAGTAGACCCAGGCTCACACACGCCAGGCCCAGAACC  
GACCGCCACCAGCGGCCGGCCGCACAAGCGTGTGCGCTGGCGTCAGCCCAAGCCGC  
CGTCCGG

>CONTIG\_253\_length\_1678\_cov\_7.968407

GGGTGGGGGGACGTCGAGGTCATGCCAAGGTATAAAGAGATTTCTCAACCCGACAC  
GAAGAAACTATAGATGAGCGTTTCAGTGCACAAGGATGCCCCCACCTGAAGGTGT  
GCGAGTGGAGCCCGGAGTTGGGCGCTACCCCATACATTGCGTTCGAGGAATACTTA  
ACTATTCCAGGGCTTGAGGACGCTGATATTCGCCTGGAGTTCGCTAACAAGCCTAGT  
CTTGAAGAGGTAGAAGACCTGCGGCGCAGGCTAAAGAACGCCGGACTGGTCTTTGT  
GGTTCAGCGGAGAACCTAGGCTGCTGACAAGGAGGGAATGCTGTTGGCGTTCGGCA  
CGGACCAAAAAGCTTGTCGAAAGCTCGGGTCGCCATCCAACCTTAGGTATTGACAAC  
GGCCGTAACGCGCCGTAAAATCGAGCTCAACATGGCCCCGGTCCCCTGTGCGAAAGC  
ATAAGGCCGGGTTTTCTTGTGTATGGGGATTGGGATGTCCACGTATTCCGGCGTTCA  
TTTGACGTTTGGGCAGCAACTTCAAAGGCTTAAGGAACGCGGCTTAGAGGTGGCGG  
ATGATGACGCTGCATTACAACAGCTGCAGCAGTTAGGGTATTACCGACTCAGTGCCT  
ATTGGTATCCCATGCGGCAATCAGGGCCGGTTCAGATAGACGGCATTTTGGGTGGG  
AAGTTAAGAATGAGTTCGCAGCTGGTGCAAGCTTTGAACAGGCGGTAGCTCTCTACC  
AGTTTGACAAGAACTTCGTGTCTTGCTGATGGAGGCGATTGAGCGCATTGAAGTTG

CGCTGCGAGTCCATATAGCATATTCCCTTAGTGCGCACTCTATATTCGCGCAAGAAG  
ATCCAAGCATGTTGGATGGCAACTTTACCTTTAGACCTGCTGCGACTGGACGGTCAA  
AGCATGATGATTGGCTTCTCAAGCTCTCCGCTCAGGTAGATAAGTCCAAGGAAGAGT  
TCGTATCTCATTACAAAAGAAGATACGGTCTCCCTTTACCGATATGGGTTGTGATTG  
AAGTTTGGGACTTTGGCCTGTTGTACATTTCTACGCGGGGATGCGTTACGTAGACC  
AAAGTTCGTTAGCCGAACGCTTTTCTATTCCCTTCGCCAGACGTGGCAAAGTCTTGGC  
TCAGGACGGTAAACTACGTTTCGGAACATAGTCGCTCACCATTCCAGGGTGTGGAATA  
GGGGGATGGTTGAAAACCCTAAGTTCAGAGGTCTTGATGCATACGGCGATGTTGGA  
TCGGGGCTAGCTGCTCTTGACGCAAGTCGTCCTTACGCTGCTTTTTTGCCTAATCGCTT  
ATCTTGAGCGAAAAATGTTGCCTCACTCAGACTGGTGTGTTTCGGTTTTCTGAGCATCT  
GGAGAGCTTTTCTGACAGACGGATGCCCCAAGATACAAATGAAACAAATGGGTTGTC  
TTCCAGGCTGGCGAGAGCACGCATTGTGGGCGGACAATAGCGGACAGCAAGAGCGC  
ACCTAGGTGTCACATGGTGACACGTGCGCAAAGGGCTTCGCCCCCTGAACCCCAAG  
CGCCGAGGGCGCTTGCGAAAATCCAAAGCCGAGGCATAAACCAAGCAACCCCACTG  
CTTCGGAATCGCCGCCTCATGGCCATTTACCACGCCAACGTCAAAACCTTCAGCCGA  
GCCAAAGCGCATTCGTCCATCGCAGCGGCGGCCTAC

>CONTIG\_254\_length\_1661\_cov\_47.232073

AGACTCTGTGTGGCAAACCACACCGCGACGTTGGCTTTACGCAGCACCTTGAGCCAT  
TCGCGGATCTTGCCGAGAACGCCGGGTGATCGAGGAACAGCCATGCTTCATCGAG  
CACCAGGATGCTCGGCCGCTTGCGCTCGAAGCGCTGCTCCAAGCGGTGAAACAGGT  
AGGTCAGCACTGGCATGACCACCTGGGGGGTGTTCATCAGTTCTTCCATTTCAAACG  
CAAGCCAGCTGCCCAGCGACACGTCATCGTGCGTTGCATCGAGCAGGTAGCCGTGC  
GCGCCGTCCACCGTGAACGCGTGCAAGGCCTGCTTGATGTCTGGATCTTGACACAGC  
ACGGTGAAGGCTGAAATGGTGCGCTGTTCCACCGGGTAGTTGAGGCCGCCCATTTTCG  
TTGAGCGCGTCCCAGATGGCGCGCTTACGCTGCGGCGTCATTTTCGACGCCTTCGCCC  
ACGATGATGTCAATGAGCCATTCTTGCGCCACGCCCCGCTCCTGGTTCGTTGTCCACG  
TGGGCCAGCGGCTGAAACGCCGGGCTGCTGTCGCCGCCTAGGTCGTAGAAGCGCCC  
ACCCACGTGGTCGGTGGTAATGCGCGAGCTGCCGCCCTTGTCGAACACATACACCTG  
CGCCGCTTCGTAGCGCCGGAACGTGTGTTTCGGCCAGATTGAGTAGTACCGACTTGCC  
GGCACCGGTTGGGCCGATGACCATCGTGTGCCCAACGTCCCCACATACGTGCTGAA  
TCGGAACGGCGTGGTTTCCCCGGTAACCACGAACATGTGCGGCGGGGAGTGGTCCA  
GGTGCTGATTGCCGGGGAATAGGTCGTTCTGGCAGTAGCGCGGCCAGCCACACG  
CTGGAACCTTGGCATGGCGTGGGCAAGGTTGAGCGTGGACACCATCGGTTCGGCGGAT  
GTTGTGTTGGGCGTTGCCTGGCACTGCGCCCAGAAACGCGTCAATGGCATTGCCATC  
GCGGGCCTCGTCAATGGTCACAAAGCCTAGCCCGTTGATTTTCGCGCTCGACCGCGCG  
CAGCTTGGTTTCCAGTCGGCGCGGATCTGTATCGAGCACGATCAACGATTGTGTGAA  
GTAGCCATAGCCACCGCTTCGGCCGCGATTTCTGTCATCGCCGATTGGCGTCGGC  
CGCATTGGCGAGGGCTTCGGGGTTTTCCAGCGCTGACTCTGACTTGCTCAGTAGCTC  
CTTCAAGATGACCATGAAGGACTTGCGGCCGCTGAACCACTCGCGCTGGATCTTCTT

CATTTCTTGTCTGCGGTGGCCTTGTCCAGGGCCACCCAGCGCGTCACCCACCGGTA  
GGCCATGCCCATCCGGTTCAAGCGGTCCAGGATGCCGGGCGTGGTCTGCGTCGGGA  
ACTGGCGCACGGTGATGATGCCCATGTGGTGCTTGCCCAGCTTCGGCTCTTTGCCCC  
CGATCAGCGGGGTGTCGGGCAGCACGCGGCACAGCTCCTGGGAAACGTGCCCCGGC  
ACCACCGGATGCCGCTTGGTGCTAACGGTGTCTGTCAGGTAGGTCAGCAGCTCGGTG  
TCATCGAGCGCGTGGACCTCGGGCAGGATGGCCGAGAAGGCTTCCAGCAGCCGCAC  
GCGTTCCACCACGAATTTGTCCACCCAATCGTTGATGGTCTGCCGGTCACGATTGGC  
CGCGGTCTTGCGCTGCCC

>CONTIG\_255\_length\_1658\_cov\_7.975833

GACAGGCGAAGCGTCCGGCCCTACCGCACCCGAGAGCGAGCACCGCGCAAGCGGC  
GCACAGCGAAGGGCCGCAACAAAGCGCCAGCGACGAGAAGGAGGCCTGTCCTTGC  
GGTCGGGACAGCGAAGCTAAGGTCCCTTTCAGAGGCCCAGCACTGGTGGAGATAAA  
AACCGTTTAGACCCATCCCAGCTGGCAAATGCCTACCTGAGTGGATAGGAAGCAGC  
AGGTGTTATCGGCCATTTGGTTGATAGATAAAAGCATCGTGCCCGACCGGGACTTCC  
CCTTTGCGCATTGGCGTGCGTATCTGACGCAAACCTGGTCCGCCTGGATACGATTCCG  
GCCTACCGCCCTCACTACTTCGACGCATGCATGGCTGTCTTCGATGTCAACGTGCCG  
GCGTTGGAAGCTCACCTTGACCGAGGTTGTGATGCCACGCTCGATCAGGAGATAA  
GACATTCGGGGACTTTCAAACCTTCAAAGACGCAGCGAGCTTGGATTGGTCAAAATTT  
CGCTTCGCGCGGCGTAGCTGCTAGGACATTGAAGCAAGCACCCACGATGAAATCGA  
TCTGAGAACGAGCCTGCCCAGGCATAATGCGCAAACCTGAGCAAAAGGAGTTGTGCG  
TGCCGATATACATGGTGATTTTCGAGTGCAAGAGTAGCGACAAGGACTACACAGGG  
TTCTTCTCAAAGATCAAAGAAATTGGCCACCCTTGGTCTAACGATGTGGGTTCGACC  
TGGCTCATTGGCCATCTGGGTAACGCCAGCACCATACGCGACATATTAAAGCGGCA  
CCTTGATAAAGAAGATCGTCTTCTGGTGGCCAAGCTGGCAAGGAAGGACGCCGCGT  
GGTCCGGCTTTTCAACGATGAGTTCCGAATGGCTGATGCGACACCTGAGCTAGACCG  
CGACCTCGTCGATTCTGAACCTGGCTAGGAAAATACCTACAGTCCAGCCCGTCTTTTCG  
CCGACAGTGCTTTGAGCCATTTTCCGCCATGATGACGTGTCGCCAGGGCGGGTCCTG  
GCGGTCGGTTGTCTGACGATGGTGTGACACAAGCAGAGGCGTATAGCACCATCAAG  
GAGGATCAGTCTTGGGCGTTACCGCTATTCGGCACGTGGGCGATTACTTGCTCACGG  
CTCATATCATCCCGTCTGACGGGAAGTTCCCTGCCGGAGCTCCTGATTTCCAAGCACG  
GGGGCATCACGCTTCACCGCTGTCCAGTCCCCGGTGTGGCCTTCCCTGATAGAAGTG  
CTGCGTATGACTACGCCAAACACTGGATGGCCGCGTGCTATGTGTGAGCACAGGCT  
CGGTAAGCGCGACCTAACCACCGCCTGACCTCAATCCTCGCCTTCTGCGTCTGTTAG  
CCCATGCCAAGCCAAAATCTCGTCGATGCGTCGTTTCGACGAACCTCAGCATCTTTCGA  
CGTAAGTGCCTTCGCCTCAATGACCTGCGCCATGCCACAAACGCGCGCAAGAAAT  
GGCGGCGGTCATGATGCTGCGCGATTACATATTTATCGCGAATATGCCAGTGCCGC  
TCGATAATATTACTTGCTGAGAAGCAACTTATCTTGTCAATGAAGCGACTGCGCTGC  
GGTCGCATCCCAAAATTCGGAAGATGTTGCGTATCACCCCGAGCGAGCGAATATGC  
ACGCCCCGACCGTGCAGGAC

>CONTIG\_256\_length\_1632\_cov\_189.106312

GAGGACTGTGAGACCTGGTTGGCACAGGCGCAACGCCGGTTATCCGCTGCATATCGT  
GAACGATATGACCTGGCCGCCTCCGGACGGAGCATGCAACGGAGCGACCGAGCGAG  
GGTGCGTGCGCGGGCCGATGGCGGCCCTCGTGTTGGTTGACCATTTCCGCTTAGCGG  
TCAGCACGGCGATAGTCGCTGTGTTGCTGCTTGTGGGGTGCAGGGGGCTGCGCCCCCTG  
CGGGTATGGCGCATGGATGCGCCGCTCTGCACTTAGCGGCTGGAGCCGCGCAAGAG  
TGCGGGCCAGGGCCGGGCGCTAACCCGACTGCTGACCCGTTTTTTCATGCCTATCAG  
GGCAATTCTTGCCGGTGGCAGCAACCACCGGCAGCACTCAGGGCCGCGTTGGAGGC  
GGCACGCATATGAAGACACAGAACC GGCCGGACATAATATACAGAGCGCAGCAA  
AGGCTTCCCGCAAAGGGTCGTTATACAAATCTGCGCATCGTTCTATAATCAGCAACA  
CACAGTTTCGCGACGCCAGAATCTTCAGTGGGTTCACTCGGGAAGACGCCGCGCGCT  
TCCTCAATGTCAGCGTTCTGAACCATCGGCCACTGGGAGACGGGTAGGGCTCGGCCG  
AGTTACGCCGCTTTCAAGCTCCTACGCGTGTACCGCCATGGCTCTCTGATCCACCCG  
GAGTGGTCCAGCTGCTTCATCAACCATCGCGGCGCTTTGGTGACTGCTGAGGGGCGT  
GAGATTCGCGCCACTGATCTCGACTGGCTTTCGCTGCTATTCCGTCGCGCCGAATGC  
ATGGGACCGCTCATGCGTGAGCGTGATGCTCTCCGCGATCAACTTGCCGCCATCCAG  
GCGCGTTCCGGCGAAGCCGGGGCGCGCCTTGGGCTTGTCCATTATAAAACAAGTGA  
CACGCGCCCCAGCGAAACCCAGCTGTATCAAGGGTTTCGCGTCGCTTATCCTCTTGC  
TTGCCATGGGGCCATAATGGGGCCACAATGGCCCCATGACAGACGCCATTACAAAG  
ATAAATTTGAGGCTCCCGATGCACGTAGTGGAGGAAGCCAAGGCGCAGGCCGCGCT  
GTTGGGGGTGTCCCTCAACGCCTACATCTTGTTTCGCTGTCTCGGAACAGGTGAAGCG  
GACCCGGAAGGAACTTTCCGGCCCTGTGACACCGCCCAAGCCCAAGCCCAAGCCGC  
GCCAGCATCGGCGGCGGTTTCCGACTGGGACGCTCCTGTCTGCTCACTCCGGTGAAGC  
GTCCTCAGGCCAAGGTTGGGCGGAACGAGGATTGCCCATGTGGCAGTGGTTCGCAAG  
GCCAAGCACTGCCATCCGGAGTGGACCTAAATCGTGACGCGTCACGAAATGCCGGC  
GGTGGCATGTGAGCGCCGATATCGATTACCTGCGTCAGGCGGTCACTCGACTGCAGG  
AGGTTGTTGCAGCGGCCTATGCCGTTTCGCGCTGAGCGCAATGCTGAGGGTGCCGTGT  
CGATCGCTGAGCGTATCGCCATGGCCTCTGTTGTAGAGGACTGTGAGACCTGGTTGG  
CACAGGCGCAACGCCGTTATCCGCTGCATATCGTGAACGATATGACCTGGCCGCCT  
CCGGACGGAGCATGCAACGGAGCGACCGAGCGAGGGTGCGTGCGCGGG

>CONTIG\_257\_length\_1609\_cov\_10.368421

GCACTGGACGGGCCAACTACACCGCCTATAGCAAGTGGAAGTATGGCGACCTGCGG  
TGCGTGACCAACCCCGAGATGTTGGCCAAGCTGCCCCGATGCCGTCGATGCGGCGTTC  
TGGTACTGGACCGTGCGCCGACCGAAGCTCAAGGCGCTGGCACTGGCCGACGACCT  
GGACGGAGTGACCAAGGCGATCAACGGCGGCTTCCGGGGGTTGGCCGACAGGCGCG  
CAAAGCTGGTCAAAGCGAAGGCACTGTTCGCGGCATTGGTCAACGGCCCCGGCGCGC  
GGTAAGCCCTGACATGCTATTCATGATTCTGCGGACGCGTTTGTCCGCCTCGCCGCA  
GTGGTTTGGTATCCTGTGTACCTAATTCAGGCAGGTGCGCCGTCGTGACCGGACTCA  
ACACATTAGCGGCTCTGGTCATCGCAACCGCCGTCCTACGACGCCCCGTGCGGTCAC

CTAATACACCGTGGATTACATTGACGTCGGTCTCGGCGCCCCGTTCAACGTGCTGA  
TGGCTATTGCTTTCGGCGCGTTCGTCGGTGTGTGGAACAAGCGCGTGGAGCACAAAG  
GCAACTTGATCGGCGCTTTCGCAATTTTCGTTTATCATGACGCTTGTTGCGGTTCGTCGG  
CATTCCGCGTTCGGACGAGCTATACATGGGACGACGTGGGCTATCAGGCAGTGATGG  
GTATGGGCCTGGCCCTCACGTCGCAGACGTGGACTCCGTGGCTCCTGGATTGGGCCA  
AAGACCGCCTATTTGGCCGGAGCAAGCAGAATGCTAACTAACCTGTGGTCCGTTCGTC  
GCTAGTCCGGCGCTCGCCGCGATTTGGCTTACCGCCCTGTTTCGGCCTCAACGCCGTA  
CGACCGCCGACGCTGCAGCGCGCGCTGACATGGCCCGGGGCGATCGACTTCTTCCTC  
GGGCTGTCGTTTCTGGCCATGACGTTTCGGTAGCTTTATGATGCTGATGGCCGTCAGC  
ATCGGAGCAAACATCTACTCGTGGCGCGGGTGCTTGCTGATGTGGGGCATTGCTGGC  
GCGTTTGTATTTGCCGGTTCGCTTCGCGCCCTGGCGGCGCTTTATCCGACGCATGGCC  
GACTTCGAACGCATCGAACGCAAATGGCGCGGTATTGCCGGACCCAGCATCAAAGA  
CCTGGGCGAGCTCATCGCCGAAGGACGAAAAGCGATCGAGTCGCCGATGCGCGAGC  
GCGCCGACGAATGCCTGCGCGTGATGCCGCGGATCGTCGTAGCGCTTGAGCGCGTC  
GCAGCCAAGCAGCTAGAGGTAGCAACTATCCGCGGAGAGCTGCAGCAGGCGCTGTT  
CGACCTGCGCGCCGCTCTAGCGCGCCACCAGCCGACCGCGCCGTACGTACTGCGAA  
TCAACTCTCTACTCGATCAGCTCGAAGGAACTCTGCGCTATGGATAAGCCACACGAC  
CCTGTGCGGGCTCTTGTGGAACGGCTAGAGGACGCGCAGCGTTACTTCGGCCCTACC  
GCCTCAGGCAATGGCGTCGCGCACGTCAACATCAACGCCGGCGGGCTTCGGCATCTG  
GATCTGCGTCACCGCTACGGTCGTGTGCGTCGTTCTCATGGTCGTGATGGCGATGAA  
TGTCAGCGATACGCGTGCCGAGG

>CONTIG\_258\_length\_1600\_cov\_6.713510

ATGTACTGGGCAGGCTTTTCTCGATGGCAATGCTGTTCGGTGGTCACGGCAATGGTGC  
TAAAACTCACAGCAAAAGTGGCCGCGGCCTACTGGGCTGTCCAACTCATCACGTCG  
GGCAATGCAGAAGGACTGTCTAGCCAAGCCCTGCAGCAGGGCGGTATGGCCTGATC  
ATGACCGGGTTGATCATCAGCGTGCCAACGTTGGCGGCTGCAATTTGGCAGGTTAAA  
GTGGGACGTTTATGCATGGGCAGCCTGCTGGGTTTATGCCTCAGCAGAACACGATGA  
ACGGTGCTAAGTCTTCTAATGAGGTAAATAGAAGCGAAAGAAACGCAAACGGCGAT  
TTTCTCGCCGGGTTCGTACGATGCGGCGTCTAACGCCAAGAGGCAGGAGCCGAATG  
CACAGAATGCTAATAAGCCGCATACTCCAGATATGGACAGAACGGACAACACATCA  
AATATGCCTGTCAATAATGCTGCTCGGGTATCCACTGATACCGGGAATGATAGCCGA  
CGAACAACAGGCTTAATGGCTCTGCAAACAGAGACCCTCTCAGAAATTTTTGATTAC  
CACATGCGGGGCATGCAATGAGATATTGCTCTTTGATTTTTTTGTGCTCATGGGCAGT  
TTTTACACATGTTGATGGTTATGCGCAAACACGCTGCCCCGATAGGTACTCAGATGGG  
TAGTATTTCAGTGTATTCCAGATGAGCCTGTTTTGGACTCCAACCAAGGCGAGCCAGT  
GAAGTCTGTACCTAACGGCGAGTGGATCAAAACCTGGGGGGCGATTGCTAGGGCCT  
CGGACAGTAGCGTGGGCGCTACCTCAGGAAAGCTTACTAAAAAAGATGCTGAGGAA  
GAGGCGCTTCGTCAATGTTCTACAGGTGGAGGAGTAAATTGTAAGGTGGAACCTGGC  
ATATCAAAACCAATGTGTCTCTCTTGCTAACTCCATTGGCGGTTTCAGGTTTAGGCGG

GATGGCAACCGGTGGCTCAATCAGGGAGGCAGAGGAGAGAGCGCTGTCAAAATGC  
ATAGGTGAGACAAAAAATCAGTGTGAGATAATATATTCAAAGTGCTCTCTTCCTCAA  
TTTAATAAATTCTAAGGAACTCCGAACAACGAATCCCAGAAGCGCGACACTACCCG  
CCTACGTTGAGGAGTGGTCCATGCAACTGACGTTTGGTGACGCTGAGGGTCTGGGTA  
AGTGCAGGCAGGCCAATGAGGGGTACACCTTCAGGCATCAAGTGAAGTGGATGCGT  
CCGTATGGGTTCGGCGGTTGTAAGTTTCTTTCCCGGAGCGTCAGGTATGGGTTGTTTG  
GCGGAAGCTCCCCGAATACACCCTGCCAACGCTCAAGCAGGTAGCCGTGGAGCCGT  
CGCGATTTGCGAGGTCCGGTTACTTCGCACGTCCAGATGTTTCAGGCCATTGGCTTGC  
TTACGGTGTAGATGCAATTTCTCAAATTTTTTTTTCGCGCCACTGCCAATCTGCCATAT  
CTTCACGCTTGGCATAGTCAGCGATTTGAGGATGTTCTTGCGCATAGCGCTGAAACA  
CACCTGGGCTTACCAGATAGACGGCATCCGCCACGATATGCACCAGCGCCTTAGCGT  
CGTTGATGACGAGTC

>CONTIG\_259\_length\_1599\_cov\_24.173234

CTACCGGTCAGTGTTCCGCCCTTGCGGATCACTGACCGGCGGCATCCAGTGAAGGCC  
AACCCATGCAGCGACTTCCGAAATACAGCAACGAACCCACCGACATTGGCGATGTT  
CTGCCGTGGGCGTATCTGGTCGCCCCCGGTGTGGTGCTGAACCGCAATGCCTCGTTG  
ATCACAACGCTGCGCTATCGCGGGCCAGACCTCGATTTCGGCCACCAAGCACGAACT  
GATTGCCGTGTCGGCCCAGATGAACAACCTGTTCCGCCGCCTTGGCGACGGCTGGTA  
TTTCCAGATCGACGCACCGCGTGCACCCAGCACCAACTATCCCGGCGGCGAACACTT  
CCCCGATCCGATGTCGTATCTGATCGATGAAGAGCGCCGCAGCATCGCCGAGACGG  
GCGTGCACTTTGAGACCACGTATTACTTCACACTCGGATGGTTGCCACCCAAGGCAC  
AGGAGAGTACAGCCCGCGCTTGTTTCTTCACGGACCCGGACGGGCAGCGCAAGAGT  
GCGGCCAACCGCGACCGGCAGACAATCAACGATTGGCTCGACAAGTTCGAGGTGGA  
GCGCGTTTCGGCTCCTGGAAGCCTTCTCGGCCATCCTGCCCCGAGGTGCATGCGCTCAA  
TGACTCCGAGCTGCTGACCTACCTGCACGACACAATCAGCACCAAACGTCACCCGGT  
TGTACCTGGTGACGTGTCCCAAGAGCTTTGCCGCGTGCTGCCCCGACACCCCGCTGAT  
CGGGGGCAAAGAACCGAAGCTGGGCAAACACCACTTGGGCATCATCACCGTGCGTC  
AGTTCCCGACGCAGACCATCCCCGGCATTCTGGATCGCTTGAACCGGATGGGCATGG  
CCTACCGGTGGGTGACGCGCTGGGTGGCCTTGGACAAGGCCACGGCCGACAAGGAA  
ATGAAGAAGATCCAGCGCGAGTGGTTCAGCGGCCGCAAGTCCTTCATGGTCATTCTC  
AAGGAGCTAGTGAGCAAGTCGGAGTCAGCGCTGGAAAACCCGGAAGCACTCGCTAA  
CGCGGCAGACGCCAACGCTGCAATGCAGGAAATCGCAGCAGAGGCGGTGGGCTATG  
GTTACTTCACCCAATCGCTGATCGTGCTTGATACAGATCCGCGAAGGTTGGAAGCCA  
AGCTGCGCGCGGTTCGAGCGCGAAATCAATGGTCTAGGCTTTGTGACCATTGACGAA  
GCCCCGCGACGGCAACGCGATCGATGCGTTTCTCGGCGCGGTGCCAGGCAACGCCCA  
GCACAACATCCGCCGGCCGATGGTGTCCACCCTCAACCTTGCCACGCCATGCCAAG  
TTCCAGCGTGTGGGCCGGGCGCGCTATTGCCAGAACGATCTATCCCCGGCAACCA  
GAATCTGGACCACGCCCCGCCGCACATGTTCTAGTACACCGGGGAGACGACGCGT  
TCCGCTTCAGTACGTATGTGGGCGACGTAGGGCACGCGATGGTCATCGGCCCCGACC

GGTGCCGGCAAGTCGGTGCTACTCAACTTGGCCGAGACACAGTTCCGTCGCTATGAA  
GCCGCGCAGGTCTACATCTTCGACAAGGGCGGCAGCTCCCGCATTACCACCGACCA  
CGTGGGTGGCCGCTTCT

>CONTIG\_260\_length\_1596\_cov\_13.303608

GTACCAATGTGCATTTTGGGAGGGAAACACGCTATCCATTACATCGCTCCTACGAGC  
TCCATTTAACTAACGGCGAACGTGATCAGAGGCACGGGATGAACTTTGAGGGATGC  
CTGCAGGAATGCTTTTGGACACACGCGTGCAAACATCTATGCCGAGACGGGGTGGA  
AGAATTTGGGATAGGTCACAACGTAAGTTCTCACCGGTAGCCAAAAGTCCATTGGA  
ACACCGACTGTGCAAGGTAAATGGGTTCGTAGTTATATTATGGAGTGAATCCATAGA  
AGCCGCCGTTGTGTGCCGGTAAATGGATAGCTATGGCATAACAATAAAAACTGCA  
AATAGGCCATACTTTTTTCATGGAACATCCATAAGTAAAGAATTTTTTCGGCCTGTGAG  
TTCATCAGTATCTCTGAAAAATAGGTTTCGGAGCACGCAGTGTAATTACTCGACATT  
CACCATTGTTTTCTGAGGAGCAAATATCTTTGACCTCGCGCTGAATATCCTCAGATG  
AAGCTCCCGTTCTGAAATGCAAGCTTCCTGCTGACGAACGCCCATCTTTATAAGGCT  
CTGCAACTGCAGCACACTGGTTTTTCATATGCTGCCCAATCTTTGCAGTTTTTTCCGCC  
CGCCTTGATGCACCCAGCTATAGCATCTCGCTGAGCTTCGCGTTTAGAAAGTTTCCC  
CACTGAAACACCTAATGCTCCACATCAGATTTATCAAGCGAAACCGCCCCCAAGT  
TTTGATCCATTTACCTGTAGGACGTGGTGATTGCTGATTTTCTTGTGATCCCTGTGGA  
ATAGGGGCACATGCAGCGACGCCCTGCCCGCCAATGGGGTACTGCCAGGGGGACA  
TCCCTGCTCAGCCATTGCTGAAAATGCAATGCTCAGTAGGAGCAGTAAGCAGACATT  
ACATAATTTTCATCTCGATACCCACCGCATGCACTGATTATTTTAGGCCTTTAAGCATT  
TCCACTTTCAGTTCTTCCAGCAATACCACGGGAACCTGCAATCTGCGTTTGCTCCAA  
ACTTCCTGTGACCCGATAGAGCGACTTGACTGGCTTGGGGCAGTCCCAGATTCTCG  
CTCATTGATTTGATTAGTATTTCTGGCAACTTGTTGAGGCGTGTAGGAACCAGCCGG  
CTGACCTTGAGGCCCAGGGCTTGCCGCACCGCCACGATCAAATGCTGAATATGCCAT  
GAACGTTCCCATATTACCCTGCCAAATTGCAGCCGCCAACGTTGGAACGCTTATGAT  
CAACAAGGTCATGACCAGTCCGATACCGCCCTGTTGTAGGGCTTGGCTGGACAGTCC  
TTCTGCATTACCCAGCGTGATGAGTCGGGCAGCCCAGTAGGCCGCGGCCACTTTTGC  
TGTGAATTTTCAGCACCATCGCTGTGACCACCGACAGCATGGCCATCGAGAACAGCG  
TGCCGATCACGTAGAACAACCACTTCTTGAACAGGTCTTTGGTCTGGTCGAAGATCA  
GCGCCAGGATGAAAATTGGCCCGATCCCGATCAGGAAGGCCAAGGTGAACTTGAAC  
AACAGCAGCATCGCCCCAGCTGCCATCGGCGGGCTGGCGGTGCCGAAGCCCGCCAT  
CAAGAT

>CONTIG\_261\_length\_1595\_cov\_23.164169

CGTTTCGGCCTTAAGTTGAATGGAAAGGAGACGAAATGGACCAATCAATTAGAAGA  
AATATTAGACAAGCAGTGAAGCAGGGAAGCGAGACATATGTGCAGTCGCTTTGTCA  
GGCTCAGGGTGACATCGATGCTGCGGCACGCTACGCCGTTGAGGTAGCGATCAAGA  
GCGGCAAAGAAGGCTTGGTTGATCAACTGGTGCCACTGTTGTGAAGTCATTTGAGG

TCTATCCGCTTGATGTGGCTGCCAAGGCGGGTTCAGCGCGGGCAGTTGAGCAGCTCG  
TGGCGTTTTGCGACGCAGAGGATGACGAGGCATTGGTGCTTGCTGCCAGGCACGGG  
CACACGGAGTGCGTCAAACACCTGCTGAAAAAATGCAGTCCCTTGCAAGGCGACTC  
TCAGGCGTTGTATGAAGCAGCGCGTCATGGTCACGCAGATGTTGTCTTTCAGTTGGT  
CATTTTCTCAGACGCCAAGGCCCAGGACAGCCGGGCGCTGATCGCCGCTTGTCGAG  
AGGGTCACTTGGAAGCGGTCAAGCATTTGTTGCCTTCTCATCGAAGATCCAATGTG  
CGCTGCATGGCTTAGCAGCTGCGGCCGAGAATAACCATGTCGAGGTCGTTGAGTTCT  
TGATCGAGGCTGGTCTTCCTGATCCCGAGGACACCTACGCATTAGGACTTAACGTCG  
CTACTGCCAAAGGACATGCAACGTTGGTGGGGAGTCTGCTTTGGGCGATCGTCAGA  
ACAGGTCATGCGCCGCGCGACTTTGGCGAGAAAGCACTGTTGCTGCAGCAACGAA  
GGGCGATGCAGGAATGGTCAAGTCGATCTTGAGGATTCGCCCACAAGACCGCCTATC  
CAGAGGCCGGCTTGTTTGCTGCACTCCAAAATGACCATGATGAAGTGGCGGATGTTG  
TGGTTCGCCGAGTGAACCTAGATCATATGCGGGACCTGATGACAGACGAAGCGATT  
GAAGCGAAGCTTGATGAGGCGATTGCCAGAGTTGATACAGCCAAGCAGCGCAGAGA  
GCTTCAATCCAACGAGCGCAAAAGGGTGGCGCAGAGTGATACGGCAGGGCCGGTGA  
TGATGGACTCATCTCGTAGCGCGCGCTTGTAAGCGGATGTTGTCGAAATAAGACCCG  
ATGTCGCCAGCATCTTCATGCCTCTGCTTCTAAGGACTTACTCTTCGTATTTCCCAAT  
CGCCACGCGATAGTGTTTCGGACCTGATGGAGGTCGGTGTCGTAGATGGCGATCAGG  
TCAGAGCTGCTGGCAATGATGTGGCCTCGAATCTTTCGCTCACCTTTTCCCAGAGTT  
CTGAATCGCCTCGCGATACCGGACCAAGGAGTCGGCCCTTTTCTGTGTTTGCATCAT  
CTTTACCAGCATGCTCGCCAAGCAAACCCGGCAAGGTCGCTACCAACAGGCCGACG  
AGAAATAGTGTGAGGGCGAGATAAACCCCCGAGGCAGCAAGGCCGGCCGATGAGA  
AAATAAGCTTAATCCATGGATGTCGCAGGAAAAATTCTTAATTCGACCTTCGCCAA  
CTGGTCGAGTGGGCAACCGGTAGATCAAAACTGCGATCCACACAAAAACAAAGGCT  
GTTGCTACGGAAAC

>CONTIG\_262\_length\_1591\_cov\_13.004781

CGGCTTCCACAGCCGGGCTGGAAATGCTGTTCCCTGTGCGTTGAAATCCGCGCTCGT  
CCAAGTGATGCCC GGCTCAAGCTTTCCGTCTTTCACGCAAGCGGTTGTCGGCTCGA  
CGCGACGCAGAACTCGGCTTGATTGAACTCGCCTGTGGTCGTCGTCCTCGGCTCG  
CAACGGCATTTCATGCTCACCAACTCGGCCAAGGCTTCGTTTTGCCGAGCGGACGCCA  
TGATATTCCTTGACAGCGCCGTCGCATCAACAACCGATTACCGTATTGGACGCCGT  
CCTTGAGAGCGGTATCAAGCTTGAACACAAAGGTGTTCAAGGAAACCTGCGCCGAC  
GGCGCCATCAGCGCATGCCCCGGTCTCGTGCCCCACCGTTCCCGCCAACATGTCCAAG  
CGGTGGAACGAATGGACGGCTCGAAAATCGAGGTATTGATGCTGACGGTGCCGGT  
CTTGTCATCGTAGTGCCCGCCCTCGTTCGGCTGGTTGGACACTTCCAGCCGGCGCAA  
GGTGCCTAGGTCGATGGCTTGCGTCATCACCGAAGTCAAATAAGGCGATGTATCGAT  
GGCCTCTCGAAGGTCACGCACTGCGCCTTCGGGGAGGCCCGGCTGCTGCTCCAGGTT  
CTGGAGCAACCGTTCAATGTCGCGCTGATCAGCCATCACGCGGCTCCATTTTCGAGCT  
TGACCCGCGAAACGCAACGTGGGTCGTCGTGCTTGTCCGTGCTGACGACTACATACA

AGCCAAGCCCGTCTGCGAGCGCTCGCTCAAAGTAGACCGTCGGCTTGAAGCCCACC  
GCGTTCTTGGTCACGCCGAACCCTCCTGCGACCAATGGGTTCATGCAGCGATTTGAAC  
GACAGGTCACAAGCCTCGGAAGGCCTCACTGTGAGCTCAATGGTGTGGCCGGGATG  
ACGCGCGTAAGGCTTCCACACAGCGAACTCATAGTGCCCCGCACCCAGTGTGCCCTG  
GAGCCCTGTTTCGCCGCCCTTGACTGTCTGGCGTCACCTCAAGCCCTGACACTTGCGC  
AACATGCATCGGGGGCCATGTCTGCTCTGGTTTCGAAAGATTTGGCCATTCTGAACGAT  
GGCCTCGACCAATGCACCTGACGTTAGTGCTGGGCCTTGCGGCAGTGGTGGGTAATC  
GCCCCGACACCACAGCATTGGGAGCGGCTCGCCGGCTGGCCTCGTCTGCGGGCCCTGTC  
CGCACTAGCAGCGGCTTTGTCTTGCTCGGAGCGCACGTCTGCGGGCGCTGGGGGGATG  
TCCTTCCATCGTTTTCTCCTGAGAGGCGTAACCACTCGCCGGTCCTTGAGCACAGGC  
CAGCGTTCCTAACGAAAGGGTAAGCACCGCAATGCTGCGAATCAGTAAGCGCAAGC  
TGAGCCTCCGTGAGTGCTCGATGTCCTTCGTTGCCGCCAGAGTCTAACCGTCAGGCG  
TAGCGTGCGTCCCAGAATGGAATCACGCTCTCAAATCACTGGCACATCAGCACCGTC  
TACGACTGCGAAGTCACTTACCAGCCATCCGTAAGCATCGCTAAGCGCATCTGCGAT  
GTCTTCTTCGCTCGCGCACTCGACCGTGGCTTCCATCGGCAACGCGGGACGCTTGCC

>CONTIG\_263\_length\_1585\_cov\_5.791495

GAGTTGCAGGGAGCGGGTGTGGTTTCCGAGCTCCGCGCTCAGCTGGTTCGGCCATGA  
GTTGGACGACGAGCACCACGTGACCTACAGCCGATCCTTCACCGCCAAGGAGAAGC  
TTGATGGGCTGCGAGGCGTATCGCCGGGCTGTCGGTGCTGGCCTACGGGCTCAGCC  
TGGACGCGCTGTCGGCCTTGATGAATAAAAAAACATCCGTCGTCTCCTTGAAAGAAC  
ATTCTTCAGGAGCTCGATGAAGCCAGCGAAGATAAAGACTAACAGCGGGGCACAAAA  
TCGCTTGGCACAATTAAGTCTATGCCTTCGGAAGTTGCGACCAAGGCTCACCGTCGC  
GTCAACGGACTGAGCCTTGATAACTTCAACTAAGTACGAGTACCATTCGAG  
ACCAGATTAACTCCTACCGCTGGATCCAAGCAAAGCTTCCTGTAAACATCAGGATT  
CACGCTATTCCAACGATACTGCCTGCCGGAAGACTGTCCCAAAAATGCAACCTGCTG  
ATACTTCAGCAACTCGCCACCTGCCTTCACCTCTCTGCTCTCACATGCGTAACGTATG  
TCCGAAATAGTGACATCCACAAAACCTAGGTTTTCTGAACAAGCCGGTATAGGCCA  
GCAGATAACTGGCGACCAAATCCCTTAGAGACAAACACGCCCTCCGAAGTCTTGTA  
TGAAATCAACACAAGACCCGAATCAATATCGGAGTAAACCTCGATGTGCGCCAGCAT  
CGCTAGGCATAGCGCCAGCGACACCGAAGCTGAAAAATCATTGACCTCTTAAGG  
CTTTCCAAATCCTTATAAGCTCTAGGAGCGTCGTAGGGAGCACACCCAGAAAGAGC  
AAGTAGCAGCAAAGATAGAACTTGAACCTACTCATCCTGACCCCACTCTGGGATGT  
AATTGGATAAAAAATGGCCGAGAGCGCTCAGGAACAGTCCCATACACCGACGGGAG  
CAATCCTCGCCCATCTGACATGTCGCACCTAACCGGTTAACGTCCATATCCGCCTGA  
TTGTCCGCCTGCATCTCATAGTGGCCGCGTCGCCCTTCCATCTCCATACAACCCAGG  
CGCCCGGCGTAGTAATCCTTGGTTTCCTTAAGCGCCATCATTTCCAAGACCAACTCA  
GGGTTCTTTGTCGCCTGCGTTGCCTTGCAAGCGGCAAGGCAATGATAGAACTGATCG  
CTCCCCGCAATATTTTCGGCTCTTCATTTCTGAATTCAACGAGGAAAGTATCTTCATTG  
CCGTCGCACCACCTCGATTAGCGCCCGACTCAAATTCTGGCTGCTTCATTGCGTATT

GGCCAAATTGGAATGTGCCAGACTCAAGCCCTAGCGGATCAATCAGGTAAAGCGGA  
CTTCCTCCAACATAGCCAAATGTCGACAAACCGCCGCCCAATCCAATCGGATCACTC  
TGCCCATACCGCCCGGTAGCAGAGTCGTAGTCCCTGAAGTAATTTTGATTCAACCCG  
CTAGCCGCATCAAACCGCTGCCCCGGGAACCGCATATCCAACACCAACGCCGCACC  
ATCGCCATCCGGATCCTGATTCGGCGCAGTGTTCCCGAAGGCCTCGCCCTTTAG

>CONTIG\_264\_length\_1578\_cov\_36.794624

GTTCAAGTTCACCATGGCCTTCCTGATCGGGATCGGGCCAATTTTCATCCTGGCGCT  
GATCTTCGACCAGACCAAAGACCTGTTCAAGAAGTGGTTGTTCTACGTGATCGGCAC  
GCTGTTCTCGATGGCAATGCTGTCTGGTGGTCACGGCGATGGTGCTGAAATTCACGGC  
AAAAGTGGCTGCGGCCTACTGGGCTGCCCCGACTCATCACATTGGGCAACGCAGAGG  
GACTGTCTAGCCAAGCCCTGCAGCAGGGCGGTATCGGGTTGATCATGACCGGGTTG  
ATCATCAGCGTGCCAACGTTGGCGGCTGCAATTTGGCAGGGTAATATGGGAACGTTT  
ATGGCCTATTCGGCATTTCGATCGTGGCGGTGCTGCGAGTCCTGGGCCGCGAGGGACAA  
CCAGCTGGGTCTTATGTGCCGCAGCAGGTGGCGAAGAGAGGTGAGCAGCAAGATAG  
TGAATCGCCAGCCACCTTACAGAATGCAACGACTAGGATTGCGGGGGCGACACCAA  
CGCAAGCGCCTCAGTCTGTCTGGCTCACGCGGGCAAGCTGGACAAGGCAGCAACCAG  
GATGTTTAATTAAGTCGTTAACAAAATTAATATTATTGAAAATATGTATGGGTGCG  
TCATGAATTATTTTAGCCTCTCAGCTTTTTCCATTTTACTCTTCTCTAGTGGCGCCTGG  
GCACAAGGTTGTCCGCCAGGGCAGTATCAGATTGGTGGTCAAGGGGCGATTGCATG  
TGCTCCTATTCCGCAAGGAAACACAGTTCAAGAGCCGCCGCGCCCAAGCGGAAAAT  
GGATAGAAACTTGGGGAGCCATTGCGGGTGATGGAAATGAAAATCTTGGCGTGTCT  
ACTGGTAAATTGAAGAAAGCTGATGCCCAGCAAGATGCGGTAGAAAAGTGCGAAGC  
GGAAAGTCAAAAAAATTGTAGCGTTCTCTATGTTTATTTGAACAGGTGTGCAGCAAT  
CGCTGAGCCTGAGCATATGGGAAATATAATTAGAAGTTTTGCTGCAGGACCTTCTAT  
AGAAGTAGCTAGTCGAAATGCAATTTTCATTTTGTAATAAAAAGAATAATAGTAGCC  
AGTGCAAGGTAATATACACCGACTGCACGGAGCCTTTATTTCAAAGTTCTGAATGA  
GCTTCCGGGGCATCATGAGGCGGCTCTTTAGATAAGCGCTTAAATTAAGAAAACCG  
ATTTATAATCAATTCTAAAGTAGTAATAAGGTGAAAAACCGAGAATAAAAATTGGT  
ATGCTCGTTCATAGCTACGTTCTAGCTACGTTCTCGCCACCTCCCCCTGACCACGT  
TCGCCGTTAGTTCAATAGAGCTCGTAGGAGCGATGTAATGGATAGCGTGTTTCCCTC  
CCAAAACGCACATTGGTACCGGTCGCCAAGGGCGTTTCGGCGCATGTTGACTATCCT  
GCTGATGTCAACCTTACTGACCGCAAGTTTGGTTGTCCTGGCCTATCGAACTTCGTTT  
ACGGTCCTGCTGGACCTTGACAGTATGCGGCCTCCATCTGTGCTTTATTGCACTTCG  
CGATAGTTGCGATGCTGCTGGGTCTCATTGCAGGTGCTTTGACAGT

>CONTIG\_265\_length\_1578\_cov\_14.788422

CAGGTTGGTCATGCTGACATTGCCGCGCTGCGCCGGCAGGCAGTGTTTCGATCAGAGA  
AAATTGTGCTGGCGTGATCTCCATGCTCAATAGTTTAATCGCTCGGGCCATTAGTGTT  
AACAGGCCCTAGCAGAGCGCAGGCTAATTTTACTATTCTCCGTGCTTCTGGTGGGGC

ACGCAATCCAATCAATCGTACGGTTTTAGAACTACTACATACGTGCTCTTGTGGTGA  
CGAAGTCCGTATAAATAACTTGGTGACAACGTGGCCGCCTATCCGAGTAGAATTGAC  
CATTGATGACACTGGCTCAATGGGTACACAGCTGAGTGGCGTTAAAACTGCAATAG  
CAAGCTTCATTGGTAATACTAATACCGGCGAAGATCAGCGTGCCGTTTCGTATGAAC  
TCATTAGTTTCAAGGACTCTCCTACTCTCCGACTCGCAAACACTGAGGACACTTCAG  
CGGTCATAAGCGCTGTGCAAGCCCTTTCAGCTTCAGGCGGTGATGACTGTCCGGAAG  
ACTCCCTTGGAGCTTTGGGACTGGCACTTTCACGAATCGACGCGGATGAAGACTCGG  
AGGGCTCTGTAATCCTAGCGACCGACGCGTCGCCAGGCACCGGAAATGTCGACGCC  
CTTATCGCACAAGCTCGCGCTAGCGGGACACGTGTAAATGTGCTCTTATCCGGCGAC  
TGTGTCGCGGGTGCAGCCACGAAGAGTCGCGCGATCAATGGAAACACCGATGTAAT  
CCCGGCGGCCACCCTGTCTTCGCGAGAAGTTTTTCTCGCCTCGCAAAGGATACTGG  
CGGATTGTATTTTTATGCTCCTGGAGCCACAGCAGAAGTATATCCGACCTGCTGGG  
ACAAATATTTAGCAGTGTTGCGGAAGGAATTACTCCGATCAAGTCAGATGAGTTAGT  
TGAGGGGATTAAAGGTGATGCAGGTGAAGATCACCTATATAGAATTGACGTACCAG  
CTGGGGGCAAACTTCTGCGAGTTATGTCGTACGGCGGAACTGGAAATATATCTCTCT  
TCATGAAAAGAGAATCAATCCCCACTGAAACGGATTATGAGAGCCGCTCAGCTCGT  
CCTTCGACAAACAGTCAGACGATGCAAGTCGACAACCCGGTTGCGGGTACGTATTA  
CATTAGACTATCTGGAGTAAGCGCGTACTCAAAGGTCGCTCTGAGGGCACTGGTCCG  
GAATTAATATTTTTATATGGTCGGCGCCTTGACATTTGTCTTGGCGCCGACACTGCGA  
TAATAAAAAGATTTCGTGAAGATAAGGGCTTGGAGTTTTTTTTAAAAATTATCGGTATG  
TTCAGCCGCATCATAGGTGCTGATCAAATCCCTGCGTCCCGAAGTACCCACCTCCGT  
CAAACCGGTGGGTTTTTTGTGCCTGCAGATTCTTGCGGGCACAACCGACGCGATGCC  
TGCGTCGGGAGGGCGGCTAATAACAACCCCTTCGGGGAAATACGCCCCGCCGGCTAC  
GTGCGGTTTCTAACCTCCCGACATCCCGTCGCCACCCGGCGGGCGGGGCCTGTTGCTC  
AAGGAGGGCTTTGCCATGCGTCGACCCACGTCCCGTCCCACATC

>CONTIG\_266\_length\_1573\_cov\_10.510373

CAGGGGAGTGGTGGCCCATGCCTTGGAGCTTCTCCGCATTGGTGAACCTCTCTGCTGT  
AAGTCGCGTGATGCTCATCATCGAGTTCATGTCCAACGATTTGAGCCCTCAGTTCAG  
AGGGCATGCCAGCACCTGCATCTCTTGGATCAAGGTCTTTCGCAGAGAATGGAAGC  
CTCGCTTTGCCTTGGGCCAGTTCTTGCCGACTTCTGCAACATGGCGGCTGAACGCCTT  
ACTGATCCAGTTGCCCCGACCGTTCGTCGCATTGGCTTTGGCTTGTTGGGAAAAGTCG  
GTCGTGGCCTTTTGCCCCGAAGTTCTTCCGTCCACTCCCCAAAATCCCAATGCCAACAA  
ATCGGGATGGATCGGAACAGTTCGGAGGCTCACATCCGTCTTGACCTTCTGAAATTC  
GCCTTCGTCATTAATCCGAATGCAAACAATATCGCCATCTTTGAAGACATCATTTAA  
CAGAAGTTGGCCAACTTCCGAAGCTCTTGCTCCCGTATACAAGCCGATCAATGATGC  
CCAACGGGCACTCGGTGACAATTTTTCAAAGTTGCTATGATCAAACAATGCTTGGAT  
CTGATGCTTGTCGTAAGCCTTGAAGCCATGCTTTCGCCGAGCTCGCTTTTACGGGGCC  
GGAAATGCGACATGGCCAGACGCGATGTTGTCGCCTTTGGGATAAAAGCCTGAGTT  
CATGGCCCAATCAAAGAACCCACCCTTGCCACCAATATAAGACTGCTTGTTCAACAAG

GGTAGGGGTGGAAGATCCACCTTCTCGCATGTGCTGATACCACCGGGCCAGATCTGG  
ACGCTTGATGGTGTGCAGCTTGGTCTTCGGCCCCAAAAATTTGACGAGGAAGTCAAT  
CGCCGTCTTTTTGATGGTGTAGGTCTTCGGGAGTGTCTGTCGCTTCAAGGTAGCCAA  
CCATCCATCCCGAGCCTTTTCCATCGTAATAATTTTCATCGACAGAAGCGACAGCAGG  
CTTTCTTTGCTCAATCAGCTCAGGTGGCAGCATGCCAATCGAGGCAACCTCAGAAGA  
CGCTGTCCAGCCCTGAGCCTTGCGGTAGAGCCGCACATCGTCTTCATTATCAATCTG  
CCATTGCTCGGTACCGTCCCGTCTGGTGCCTGCGTGCGATGAAGCGTCAGATCTTT  
CTGACTCTCGGCACGGGTCAAGCGCTCAACGAGCGCTTCCACATCCTTGGTGATCAT  
CCGGTCCATCGACAGTCCCCGAAGTGCCTTGAAGACCTGAGCATAGCTTGACGCAA  
GCCTGATGGCTTGGATCTGCGCGTGTCTGAAGTTCGGTGGTTCTGAAGCGTTCGCTTGA  
TGACCCGTCTCCCCAGCCTGGCTTGGAGGTCAAGGGGCACTCTCTGTCTGGAAAGACC  
ATCGACCAGAGGCGGAGCGAATCAAATGATGGGGAATTCTCATCGGGATGTGTCCC  
GATTTGTGCCCCGTTTAAGATCTTGTCTGAGATTGCAAAGACCCCTGTAAAAACAGGGG  
TTTGCGTAAACTGGCGGAGAGAGGGGGATTCTGAACCCCCGAAGCGCGGTTTAGACG  
CTTACACACTTTCCAGGCGTGCTCCTTCAACCACTC

>CONTIG\_267\_length\_1563\_cov\_11.012535

CTGTTCCGTGCTTGAAAGGCTACCGCCGGATTTTCTCGCGCTTCGAGAAGCTAGAT  
GTCATGTTCCCTTGGATTCCCTCAGCTTCGTCCTAGTCGTTGATGGGCTTCGGATGTGTT  
AACAGGCCCTAGGAGCCTATCCATGTCCCAGCAAGCCTCTTTCAGCCAATTGGCTTT  
GATCTATTGCGGCAAGTTACTGCCGCTCGAAGTCCTGCAGAGCGCCGCAGGCCACTA  
CATCGGCACACGCAATAGCGAGGGACCCGTTTCGCGGGAATCTCGCGAGTACTTCC  
GCAGCTACGCCGCGGCTCAACGTGTCCTCGAAAGTGGCGGCTGGTCCCAGCTGGCC  
AATCCCTGATCCAAGTAGAGGAGCCACATCATGAACCCACATCTGCCTCTGGAAATC  
GTCGGTCAGATCATGCAGGAAGTGCAGCATTTTCGCTGATGCGCCCCAAGCCTTCTTC  
GAGGCGTGGAAGCGTGGCGTCGAGATCGCTGGCGCCGAGTGGTTCGGCGAGGGCAC  
CCCTGAAGGCCTGAACCAGGCCAAGAGCAAATGGGATTTGCGTCCCAACGTGCTGC  
GGATCAACGACGCCCTCGGCGTCCTGAGCAGCGGGGAACGCATGTTCTGTCCGCC  
ATGGTCAGCTTCTACAACGCGCGCGATGGCGGTGCCATGCTCAAGCGCTGCCAGTTC  
CACGGGCTGTCTGGATTTTCGACGGTCTCGACCTGGAACGCCGCAAGGTCATCGCCGAT  
CTGCTGGTGAAGTACAGCGGCTGGTGAGCATCTCTCCGGCATAACCACTACTTTCTCG  
TCCCCCAATGAGGAACATGCGCCCGCAAGGCCCTGTTCTCATATTTTTTTTCCCAT  
CACCCAGCGCCACTAGCCTTGGGCTATTAGCAGGATATTGACTGTCTTGATCTGCTG  
CTTGGGTCAGACGCTACAGTGGAAGTGCAGGGCTGGCCCCGCGCGCTAAAACCG  
TGGCCGAAGGAGCACAGCTCACACGCTTGGAGACAGCCACATGGCCAGCACCAACCG  
AAATCGCTGCCCTGTTGGCTGCGACCGACGCGCAGGGCCGCGTCGATCCGCTGGCCT  
ACGAAGCGCAGCGCCTAATCCTGCAGCATCAAGGTCTGGGTAGCGTAGATGCGGCC  
GCACTGGTGCAGCGCCCTGCCGGCCTCGCCGGGTTTTACCGCCTTCGACCGCACCAAG  
CTCTTTTCCGCCATCGACCAGCGCCTGGATACGCCGCAGGAACGGCAGCGTTTCGCC  
GACGCGCTGGACCAGGCCAACCTCAGCGACGGATGGCTCGAACGGCTGGGCGAGCA

GGCGGCCGAGGTCTGGCGGCCAGGCCTATGACAGTACCCGCACCCGACGTGCGCTGGG  
CCGATACCCAGGTCAGTGACGGCTTGGCCGCCGCGCAACGCAGCACCCGCGACACT  
GCGGCCGCTCCTGGCGTGTTGCCCCGGCCTGCGCGCCGAAGCGCAGGCCGGCAACAA  
TCTGGTCGGCAATGTGCAGCAAGGCTATGGCTTCGTCACTGGCGGGGGCGGGACATG  
CCGTGTCCACGCTCGGCGATACCGTCGACCTGGTG

>CONTIG\_268\_length\_1559\_cov\_43.232542

GCCGGCAAGTCGGTGCTACTCAACTTGGCCGAGACACAGTTCCGTCTGCTATGAAGCC  
GCGCAGGTCTACATCTTCGACAAGGGCGGCAGCTCCCGCATTACCACCGACCACGT  
GGGTGGCCGCTTCTACGACCTAGGCGGTGACAGCAGCCCGGCGTTTCAGCCGCTGG  
CCCACGTGGACAACGACCAGGAGCGGGCATGGGCGCAAACATGGCTGATTGACATC  
ATCGTGGGCGAGGGCGTTCGATATTACGCCGCAGCGTAAGCGCGCCATCTGGGATGC  
GCTCAACGAGCTGGGCGCAGACGACAGCCCGGTTCGAGCAACGCACCATTTCAGGCT  
TTACCGTGCTAGTGCAAGATCCAGACATCAAGGAGGCCTTGCACCCGTTTCACGGTGG  
ACGGGGCGCACGGCTATCTGCTGGATGCAACGCACGACGACGTGTCGCTGGGCAGC  
TGGCTCGCGTTTGAAATGGAAGAATTGATGAACACCCCCCAGGTGGTTCATGCCGGTG  
TTGACCTACCTGTTTCACCGCTTGGAGCAGCGCTTCGACGCGAAGCGGCCGAGCCTC  
CTGGTGCTCGATGAAGCATGGCTGTTTCCTCGACCACCCAGCGTTTTTCGGCAAAGATC  
CGCGAATGGCTCAAGGTGCTGCGCAAGGCCAACGTTGCAGTGTGGTTTGCCACGCA  
GAGTCTGGCCGACGTGGCGCAATCCAAGATCATGCCGACGCTCATCGAGGCATGCA  
TGACCAAGATCTTCCTGCCCAACAGCAGCGCCCGAAACGACGAGGTGGCCAAGTTC  
TACCGGATGTTTCGGTTTGAACGACAAGCAGCTGGACATCCTCGCCAGCAGCACGCC  
CAAACGCGACTACTACCTGACCAGCCCACAGGGCAATCGGCTGTTCTCGCTCGGCTT  
GGGTCCGTTGGCACTGGCCGTTTTCGCGCGCTACTGGAAAAGAGGGCGCAGCGCGAAG  
CCATTGCCATACGCAACGCCACCAGCACCACCAGAGAATTCAACGAAGCGTATTTA  
GCGCACCTGGTCAACAAGCACGACCAGGCGCAAGTGAGCAAACCCGCGAGCCAGC  
GCACGGCTTCGCCCTGCAATGGGCGCTCGACTTTGTGCGCTCGGTTGATAGCAGTC  
CCGCACCATCCAGCAACACCACCATCCAAGCCTAAACACAGCATGGAGAACGCTAT  
GAAAATTTCGTGCGGTCACCGCCGCACTGACCGTCGCCATCGGCTTAGCAGTTGCCGG  
CGGCTCAGCTATCTACGCGCCGCCGGCACAGGCGCTGGTCTGTGCCAATTGCAGCAA  
TCTGGTAACCCAGCTGCTGCAACAGAGCCAAGAGATCAGCGCCTACGCCAAGCAAG  
TGCAGCAATACAAGACCCAGATGGATCAATTGAACTTGCAGATCCAGCAGGTCGCC  
AACGAGGCCCGCAATCTTGCCTCACTGCCGCGCAATGTGTTTCGGCGAGTACCAGCA  
GGTTTACAACCTCTATAAGCAGAGCATCAACCAGCTGCGCGGGAGCATGGCGAAGC  
TGCAAAACACGCGCGACATGTTTCGCCAGCGCTATCCCC

>CONTIG\_269\_length\_1551\_cov\_7.861657

TCGTGACGGTGCCCAGGTAGTGCCAGGCATCCAGCACGTGGAGCTGGCGCAAGTTC  
TCGCCCTTCTCTTCCAACGCAATCCGGCCATGAAAGGGCCAGGTTGAAAGCTCTAGA  
CGAATGAGTGCAGCCCGTAGGCGCTCTTCGTGCTCGTCCAGGGTCTCACCTCCCGAG

CAAGCGCCGGCGCAGCGCTTGAGCATGGCCCCGAAAGCACGGGGCGACCCGAGGGTA  
GCCGCTCAAGCCCCACCAGGGCGTAGCAGAGCCGGTGGTCATCGGCGATGCGCCGC  
AAACTTTTTTGAGCGGACTGCGGGCTGGAATAAAGCCCCGTAGAGCATCGGAGAGGA  
AGCCACATCGTATTCTGCCGAGTGGACGATGGACACCTCGCCCCGATAGAGCCGGA  
TGGAGAACTGCCGCGGGACCTTGCGGAGCAGCTTGTTGTAGAGCGGCATCTGACGTT  
TGACCATCTGTGCCTCCAACAAGCGCGCGCCAGTGTCCCCTGCCATGGGGATACAGG  
AAACCGAAGTCGTTTGTGCGCAGCAGTGAGGCTTCTTCCAGGGTGCGACAATGGTCCA  
TCACCCGGGTGCGCACGTTGACGCTCTTGCCAATGTAAAGCGGTAACAAGCCTTCCT  
TCCCGTGAAAGGTGTAAACCCCTGCCGTGTTAGGAAGTGCTTCCACGCAATCGCGCA  
GATGCTCTGGGTAGGCGTAGTCGAGAGCGATGGATGCGCGGGCGGGCGCGCTTGGA  
CTACTGGGCATGCGATGTTGTGAAGGCGGCAATTGTATGGGTGACACCTTGGTGAT  
GGCAATCTCAGTCTGTGCGACTGCCTCCCACCGAAGGAGCCTTCGTCCCACAAAATT  
AATAGGTCTCCTGCTGCTGCTCATAGCGATCATTTCATTCGATCCTTATGAGCGCGTCG  
CCGGCGTGCGCGCCACAGCGTCGCTGGCTGCTTAAGCTATGCAGGACTTCAACTACT  
TCACCTGCACTATTTTTAGCCAATGCTGCTCGGACCGTCCAAGACATGGACCGAGGA  
ACGGAGAGACACCACCAACAACCAGCCTGCCTCTTTGATGCGGTGCGGGCGGATAGG  
GTAAGCATTCTCAATCGAGTCAATCGAGACCGCTCCCCGCGACTACATTGTCATCC  
TTGGCCCCCTGCTCCTGTTGGGTGTTTTGCTGCTGCGTCTGTTTCGAGCAGCTGCTGGCG  
GACCTGGGTCTGCTGAATGGTCTCGGCTTGCTGAAGGTTCTGTTGCGCCGGTTCTTGC  
GCGGCTTGGCGGGCCATCGACATGGGCATGAAACATTGGCGCGACTCCCATCCCATT  
GGCGCGTAGACCGCAAAGACATTGTATGCCCCGTCTCGGCCTAGCCCCCGGTGACC  
TGGTCCACTTGCTTCAGCAACGGGTCTTCAGTCTGCTGCTTGTAGAGCGAGGCAGTG  
ACGTTCTTGCTCTCTTCGTCGTTCCAGTTCCCAGTGCCCCGCACCCAGGCATGGATCT  
GCTGATAGGTGTGGTGGTCGGCGTGCGGCCGGGTTGTGCGCCAACACCAGGCCCGGG  
GCGGCCCTCTCCTGGGC

>CONTIG\_270\_length\_1519\_cov\_20.356322

GGAGTTGCATCAAAGCCATCATGGCGGGCTTGCTCGGCTTGCAAGCGCACTGCCGC  
GCCAGGACGATCACTTTTCAGGCACTCCCGCACGGCAGATTCATCGGGGTAACACAC  
ACCAGCCGGAAGGCCTTGACCGCCTCCTCGCGTATGCTGATAGACCCACTGCACGGC  
TTCCCAGAAACGTGCATGGCCGAACCTTTCTCCGACACACTCGACCCAGCGCGCTTC  
ATCTCCCGCTGCCGGTTCGTGTATCGCCAAGGGCAGGTGATTCCACTGTAGGTTGAC  
GTCAGGATGGGCATCGACCCAGGCGCGCAGGGTCGGTGTGTAGGTTTGGCAAAAAG  
GACATTCAAGATCCGCGTATACGACAACGGTAAACCGGGCTGTGCTTGAGCCGTGA  
CGCCAGGGCGGGCCATCGGTTGGTTCAGGCATGGACGCACTTAGCGCTGTAGGTCG  
AGTCAAGACCAGCACGCTATAAAGCAGTGCTGCGAGCGCCGCAATCACAATCGTGG  
TCAAGCACCAGAAGCGCAGTCCCTTGCGAGGGCGAGCAGATAGGTGTTTCGATAGTC  
ATAAGGAATCTCAAACGAACAAGTCGTCGTATGGCAGTGGGCTAATGCCCTGGCA  
TGGTCGATCTTCTCGGCGATCCTGAAGGCTGCCTCAAGTTCGCCAATGCCAACTCC  
TGCATCACCTGGAACCGCTCGGCTTTCTCTTCGGGCTCTGTTTGGGCCAATGCGAGG

TAGAGGCTAGGCGGCACTGCACGGAACAAGACTTCCATCGACTTGGACAGAATCAC  
GCCTTCGCTGAACTTGCCAGCCTCTTTGCGAGCCGACAGCATTAAAGCCTTCTGAGC  
GGGGTTCAACTCGCGAAAACGCGCGATCTTTTCAACCTCATCCGGCGGCATCGACAG  
GCAGATCCACCATTTCGATCATGTTCAACATTGGTTCGGCGGACTTGGGCAGATCGTC  
CACGTTCTGAGTAGCGAGCCAGAACCAGGGCGCCAGCTTGCGCCACATCTTGGTGAT  
CTTACCACGTAGGGTGACAGCAGCGGATTCTTGGTGATGATGTGGCCTTCATCGGT  
CACGTTGACGATGGGCCTCCCCAGAAATTGATCACGCTCGGCAATGTTGTTAACCGT  
GCTGATTAGGGAGATGTAGGCAATCGACAATTGGGCGTTGTAGCCCTCACGCGCAT  
ACGTTGCTAGGTCCACGATGGTGACGTCAGCTTCCGGCCACGGGGTTCCGGGGCGAT  
CAAACATCTCGCCGTCCGAGCCTTGGCAAAACATGTCCATAGCGTCCGCCATTTCAA  
GCAAACGGGAACGCCGGATCTCCGGAAGCGTTGAATCACGGCCGCGCTCGCGTAAC  
GCTTCACGTACGTCGAAGTGAGCACTGTGCGATTCTCTGCACTGCAACGCTGCGCA  
GCATCGAGTATGCATTGACGAATCAGCGAGCGGTCGGCGCGGGTCATTTCGCGCCTC  
CTCCTTGTCCTCTCCCCCGGTAATCATCAAGCGTGCAGTGATTTCGAG

>CONTIG\_271\_length\_1517\_cov\_44.436691

ATGAAGGAGTTAAGCGAACAGGCTGAGAAGAAGACCGGTGCAACTGGCGGGCCACA  
TCTTCTTCGGTCAATTTTCCAGCAATGGTGCAGACTTCCTTCTCGTGGCAATGATGAA  
GAAGAAGGGCGCGATCCAGCTCAGCGACGATCTCCAACCGACCCACATCGATCAGA  
TCGATATGTCCAAGCTGCATCAGGCCGCAAGGATCAATCTGACGAGGTATGAGAAG  
CATCTGTCTGCACAGGATGCTGACACCGAGGATCAGCCAGATGCCAGCAGCGCAGC  
AGTTGAGAAGACATACCTTTGTTTCGTAAACCGCAGAGGCCGGGAGGAGGTGCGGG  
ACTACTTTGTTGATGCGCTCGGTTGCGTTAAGGGCACTTCGTCTTCACAGCTGACCA  
CTAAATTATTGAAGTTTGTGTCAGGCAGTTTGTCCGCGACAACGACAACCTTCGGGACA  
TGCATCCTGAAATAAAACAGGGTGTGCTTGACTATCTTCAATCGCTCCCAGACGAGA  
AGCCGGTCTGCTTGACGAGGTGGTGCAAGCGGGCGAAAGCAAAAGTGAAGCCGCAA  
GATGCGGTGCATCTAGACATGCTCAAAGAATTTCTCAATTCAGAACAGTGTCAGATT  
CCTGATGAGTTCACGCTGAGTCGCGAAGCGTTGAAGGCGCACATTCGGATCAAAGC  
CAAGAGTTCGAATTGGAGCTTTTGGTTTGAAACCGGCAGTGTGGGCACAAAGAACA  
CCGAAATCATCTATGATCCTACAACGAAGGGCGTAACTTTCACGAAGCTTCCCGACT  
CAACGATCGACGGCGTGGAAGACGCGCTCCGTGCGCGGGGCGAGATCCCCTGATGT  
TCTCGGATGTTGTCGCGCTCTACCGTCTGGCTGGTCGCCCTGCTTTGCAGGGGGCACC  
GCTTCTCGTATCAAGGGCCAATCACTCCTGAGCTGAGCGCGATCATTGAGCGCTGTA  
AGCAACTCAGCTTGGATTTCCGGGCACTTTGACGATGGCCCTGATGTTGAAAGCGATG  
AAGTGGATTTTACTTGGGCATTAGCAGCCAATGACTCCGGGCGCTTCTATCGCTCGT  
TTGACGAGTTTCTGACAGATTGCGAGTCCATCCACAGAGGCGACTTTCCGAGCAATT  
TCTACTTGCTCGATAGTGACTTCCTCAGCAACTGTGGTGAAGGGCATGAGCAGCCCC  
CTGAGCTTGAAGACTGCAATCACTGTGCGAAATGATCCAGTTGCTCAAACGCCTGA  
GCGTAAGCGGTGATCTTGCGGCCATTCCCGGGCGTCTGCGCATCTCATCTTCGTCA  
AGGCAGCTTCTGGTGGGTTGGCGCCAGAGACGCTTGATCTGACGACCCGCATAACA

AGGCAGATGCTCTATCATCCCGCGCTCGATCTAGGGTTGCTCAAAGACCTATTAGAA  
GAAGACGCCAAGGGAAAAGTTAGGACCGAAGAATACAAGGCACTATTTTCGATTGGG  
TGTGGCCGATGTCCTGGCGACCGAGTCCGACATCGAAGGCCGATTT

>CONTIG\_272\_length\_1507\_cov\_4.856522

TCTACCACCGCGCCAAGGCTTCGCTCATGCCGCTGGCGATCCTGCCCTGGGTGATCT  
ACTTGGCGCTACCGATTTTCAGTCCACCCGCTGCTCATCTTGCTCCCGAGCGCTGCGCT  
ATTGGGATTTGTACGAACCTCACCGCGGGCAGCTTTAAAAAGCACCTCTAATCTTC  
GGTCGTGGAGGCATCCACGATATTTTTTAGCTGTTTCAGCTTCTCAAGCAACTCGTCG  
TAGGTGATAACCAAAACGTCCTTTGCAGCATTCCTGAAAAGCTCAAATGATCGCCGG  
TCTTCTGGCGTCTCTGGTGATCTTCCCGCGATGACGATGCAGTGCACGGCAGCCACA  
TCGGTGCCGACTAGACCAGGGTCGTTAAGCTTCGAGCCAAAGGTTGTCATCAACGTA  
TAGCGCTGATGCAATACCTGTGTGAGAGCTCCGGTCAGTTCACGGTGCGGCGCTTTA  
ATAGATCCACGATAATTCTTTTTTTCTAGCAACTTTGTCTGTGGATGCTTGATCTCAA  
TCAGAGCGATGTTGCCCGAGCAACGCTGCGCCAGCAGAAAATCTACAATACTGTGG  
CCGTGCCCCCTTAAGCGAAATGTTGCCGATGTAGGCCTGATCCTGCAAAAGGTAGACC  
GGATAGGCAAAAGCCAGTCCGAGAATGAAAGCGTTGTTGTTGAAAAATGTTTGCCA  
AGCAACCTCCTGATGATTACCAGCGAGCATCTTCTCCAGCCGCTCGGTTCAGCTCTTT  
CAATGCAATCCGCTCGATGCTCTGCGCTAAGGCCAGCACCGTCTCCAATTCCTCTTT  
AGCGGATTTTTCTAAATCTTTTTGTGCAGCCGAAACGATGGCTTTGCGATCAGATGC  
ACTGCGTGCGCTTCCATCTCCCTGGGCTTGCACAATCTTGACGATGGTCCCTGCTTTA  
ACGCGCGGTTCGCTAGCCGGGTAAAGGGTCGCGTCGATCGAGCTCAATAGTTCGTTG  
TGAGTCGCGCAGATGCGCTCGTCAAGCGCACTTTGTTGGGCTCGTCGGGTTATACCG  
TCTAATCCCCCTACGTAGTGCGTCGAAACGGGCATAGCCCAGTTCATATGACGTAGCG  
GCCAATACGGCATGGTTGCCGTGCGACATGTTGATAGTGTGATGCTAGCTACTTTT  
TCCAATGCTGCGGGAATTAGCCGATATTCCCATTTCAAACCAAGACCATATATAGCC  
TTTCGGCTAAATCCTACAGGCAACGACTCCAGCAGTTCGTCTGAACGAGTATCGATCC  
TTGGGCAACGGAAAATTTGGCCCACAACCACTCAAGATAATCTGATGGATCTGGTCG  
TATTTTGGCTTTAGGAAATCTGCCTTAGGGATGGTCTGATCAACGGCGTCGGAGGAT  
GAGCCTAACCACATCGGCCGGGCTGACGGCGCTCAGATCCTCGATTTTTTTGCCGTTT  
CCGGCGCGTTCGAGGGTGTTGCCCGGGTTACAGGCACACCGCCCCCACGACAGGC  
ATCAACTGCTTTCGCTTCATCCAC

>CONTIG\_273\_length\_1484\_cov\_135.119381

CAAACCCTCGATACGGATTTCTGAGCGGGAGTTGCACCGATGGCTGACACACCGGC  
TTTCCAAGGGCATCATGTCATTGAGCAAGCGGCTTTCAGTGAGAGCCGATTGCTGCA  
GTCGCTTTCCAGAAGCGGCTGTTCGATCTGCATGGTCCGCGCAACATCCTCAATCT  
TCCCGCTGACCAGGCGTTGGCGGCAAGGATGGGTCTATCGCCGACCCCGGTGGAC  
CGCTTGGGGCGTATTCCGAGGAACTTGCGAACC GGCTTGAACGACTGGAACGTGCC  
CAGATGGACAAGCCACGTTGCGCGGCGATCAGGCGGCCGCGCAGCGCATCGCGGCC

AGAGTCAATGGTCTGACCGACACGCTCAAGGTGGGCCTGGTCAACGGCGATCTCGT  
GAGCAATACGCCGCACGGCATGACGCCCCAGCAGGCGAACGCAAAAATCCGAGCTT  
TTCATGGTGATCTCGCCGCTTACCAGCAAAGCCATGCCGGCCAGATTGCCGATGTAG  
GAAAGATGGCAGCAGCAGAAGCGCGCTGGGCCGGCGTAACGCGGTCTGAAGGCAA  
TGTCCAACCTGGCCTTAGAAGCGATCGATCAGCCAGGATCCTCCACCCTTAGTGATAG  
ATGGGGTGGTCGGCAGTCACTTGGCACAGCAGTTGCTGAAGCAAACCAAGCCGGCC  
GCCTCCCAATCACCGAACCGATGGACGCGCGTCTGCGCCTCACCTTTCCTCAAGAAA  
TGCCTCCGGTTCTTGCGCGACCAGCGGCCGTACCTCGGATTCCCGGGCGTCCCAGGCG  
AAGGCAGCATCGTTACAGGCGAAGGTCTTGACGCGGAGGCTGCCGGAGCACGTGGG  
ATTTCTGGTGCTCGTATCGCGGGTGCGGCTGGCGTAGCGCTCATGGCCTACGACTTC  
ACTGTTACCGGCCACCGCGTTGTCCAGCTAAGTACGCAAGGCAACGACACCGGCGC  
CGCCTCGGCAGCCACACACTTCGTGCGGCCGAATGCAGGCGGCATCGCTGGCGGCTT  
CCTGCTTGGTGCCGGCTACGGCGCCGCCACCGGCTCATGGACCGGGCCAGGCGCGC  
TCGCGACCGGTTTGGCCGGCGGCCTGTTGCGCGGCTACCTTGGGGAACGCTGGGCTG  
AGAAACAGGACATCAACCGGATCTACACACAGCCAGACCGCAGTGGTAACGAGTGG  
ACGCGTAACCCGGAAGATCCCCAAGGCACGTGGACGCGCACGGTGAGCGCTCCGTT  
GCCAAACGGCGGTTATCAGGAAACGCGGCTGGTTGCTGCTGGCCGCCTCGCCGACG  
AACTGAATTACCGCGCGGCGAACGACTCGTATTCACTCGGGCTGGCAAATCCACCA  
AAGCCGCAGGATCCATAACCGCCTGGATGCCAAGAACGAAACGCATCCGCCGCGCGA  
ACCGTTTGAAACGGGCCGCGACTATGTGCGCGATGCGCAGACGGGGAAGTGGCAGC  
TTGAAATCAGGGAAAATAT

>CONTIG\_274\_length\_1481\_cov\_39.074594

CGCGGGCTACATGCGTCAGACCTACACCGACGCCACGCAGTGGTGGGAGTACACCA  
GCTCTTCGGTTATGCAGGACGCGGCCTTGATGGCGACCTGCTTGATGAGGTAGTCA  
CCGATGTGCCAATCGCCGACGCCGGCGCGATAGATGACAGCGGCAACGAGGCCTCG  
CCATGAGAGACGTCGCCTCAACCGCGCAACGAGAGCAGAACCAGAGCCAAGGCCTG  
ATCGTCGGCACCTTACGCTACCGTTTCGGCTGCTCGCGGTGTTGATCGGCTCGCTG  
CTGTTTTTCGATCGTCGTGGAGTGTGTCGGCATGCACCTGTTCTGGAAGGACCAGGGA  
TGGCGCCACTCCCAGCAGATGTTGCAGTCCGAACCTGGGGCACCTCTCCAGTCACTTC  
ACGCGCAGCATGGTTCGTGCAGGAGCCGGGGCGCACGGCGCACGAGCTGGTGGATAC  
CGGCTACGAATGGGTGTTTCGTGCGCTCAGGCTTGTTGGAACGGATGAGCCAGACCG  
CCGAGCGCGCCCACGCGCCAAGCAACGGACAGACGCGCAACTTTCGCTACTACATT  
AGCCAAGTCTACGTCTTGACCGAGAGCTATCTGATCGCTGCTGCCTTCACGATGCTG  
ACCTTCATCGTGCGTCTGCTGGTCCTGGTTCTCACGCTGCCACTGATCTTCACGGCAG  
CATTCGTTGGTTTGATCGACGGCCTGGTGCGGCGCGACGTGCGTCGATTTCGGTGCGG  
GTCGGGAATCTGGCTTTATTTATCACCGGGCAAAAGCGAGCCTGATGCCGCTGGTCG  
TGCTGCCTTGGGTGACCTACCTCGCGCTGCCGATCTCAGTGCACCCGTTGCTGATCCT  
CTTGCCAGCGCAGCCTTGCTGGGCTGGGCTGTGAGTCTGACCGCCGGGAGCTTCAA  
AAAGTACCTCTAGACCATCAATCCGGTCGCCACGAGTTCCGATTGTTTGCGGCCTG

AAGTCGCCTTGATCTCCACGATCAAGCCATTGCTGAACACACAGGAATGGCGCGAT  
GGTGGCTTCAACTTGGCTACGCGCCGCGCATCGCGGCGTGCCCACTTTTCTCTTGAC  
GGCCCTCTTGATGGGGCAGTACCCAATGGCGTTGGCCGAATCTCCGGCACAGCGCC  
AGGAACTGGTCGCCGCGCTGCGCCAGCTTGATGCCCTGGAGCGCACCGTCGCGAAC  
AGCGCCGCGCATACCCCCATCACACCGGGCGAACGCTACCACTTCGACTACCCGCGT  
CTCCTGGCTGATCTGGCGCGCGTGCGCGTCGGCATCCAGGACCACCTCACGCCATCG  
CGTGCCCGAGCCGCGTGATTCTCCGAACTGGCCGGTGACTAACGCACCGAGCAGCG  
CACCGAGCTGCCGCGGACGACCGCGGAGGGCGAGCCATGAACGGTGCCCGAGATCTC  
GGCATTTCAAGCCAACAGCGGCATCGCGCCTTCAGCGATGGCGACCGTGCTGGTCG  
GCGTCGTGT

>CONTIG\_275\_length\_1468\_cov\_7.096197

CACCCGCACCGATCGCTACATGCTGGCCACCGCCGGCATCACGGTGATGGCGCTGTT  
CTGCTTCAACCTGCTCGGCGATGGCTTCGTGCTGATCTGGCCGCGCCTGATCGACAC  
GCTGATCGGTTGCGCGATTGCCGCGGCCGCGCTCGTTCCTGATCCTGCCGGACTGGCA  
GGGCCGCCGCGCTCAACCAGGTGATGGCCACGGTGCTGGCCAGCTGCGCGCGCTATC  
TCACCCAGGTGCTGGAGCAATACGCCAGCGGCATGCGCGACGACCTGCCGTACCGC  
ATCGCGCGCCGCGACATGCATAACGCCGATGCCGCGCTTGTCGGTGGCCTTGTTCCAAC  
ATGCTGCGCGAACCGGGCCGCTATCGGCGCAATCTGGACGCGGGCTTCCGCTTCCTG  
GCGCTGTCCAACACCTTGCTCGGCTATCTGTCTGCACTGGGCGCGCACCGCGCCGCA  
CTCGATGGCGAACACGACCCAGCATCGCGCAGGCCGGCGAGTATCTGCAGCGCGC  
GCTGGGCGAAATCGCCACCGCCTTGCGCGAACGCCAACCGCTGCCCGTGACACGACG  
AAACCGAAGAAGTGGCCACCGCCGAAGCGCTGGAACAACATGCCGTGCAACTGCCG  
CCCAAGCAGCGCCTGGTGCGCGACCAAGTTGGCACTGACCCTGCGCTTGTTGCCCAAG  
CTGCGTGCTGCGGCGATGGCCGTCACCACCGCGCCAGCAGAGAACACAACGCGCTT  
GGCGCCCAACAAGGCCTAGCCTGGTCGGTAGGCGCGGATACCGCGCAGCCCATGCA  
GCATCCATGTGCATATGCGCCTCCGGGCCATGCGATGCCGAGTACCGGCTACGTCCG  
CCCAATCACCGCCTCGTCGTTCTGGTAGCCGCGCCTACTTCCACTGATTCCGCGACA  
CGCTCAACCCTACCCACCCCAACGCCGCCACAGCCAGTACCGCCCCACCGATCACA  
ACGCCGTTCCAGCCGGCCTGCGCATACGCCGCCGTGCCCAATGTCGAACCCACCGCA  
CCACCGATGAAGTAGCAGGTGATGTAGGCCGAGGTAATGCGGTTGCGTGCAATTGGG  
ATTGCGCTGATAGATCACGCTCTGGTTGGCGATATGCACGCCTTGACCGCGATATC  
CAGCAACAGCACGCCGACGATCAGCAAGCCGATCGATTGCGGCGCAAACGCCAGCA  
ATCCCCACGACAGCAGCAACATCACCAGCCCGCCCCAGCTGACCCGATCGCCATGC  
CCGTGATCGGACCAATGACCCGAGCGATTGGCCGCCAGCGCGCCGGCCGCACCGAT  
CAAGCCGAACAGCCCGATCACTGCCGTGCCAAAGCCATAGCTCGGCCCCGACAACA  
AAAACGCCAGCGTGGTCCAGAACATACTGAAGCCGGCAAAGATCAGCCCGCCCAGC  
ACCGCGCGCGACCGCAGCACCGCATCGTCGCGCAGCAGTGTCAGTACCGAGCCCAC  
G

>CONTIG\_276\_length\_1461\_cov\_8.352324

ATGTTATGTTATTTTCGTTAGTTTAATTGAGTTAATCGATGGCTGCGACGGTGCAGAC  
AACTCAGAAATTCCCTACATCGCGAGGGGATTGAGGCCTATGGTTTAAACAACCTAAG  
CGTAATTTGACATTGCCGGACGCGAGACCGATGGTCGCTCTCCTCGCGGACGATTGA  
GCAGCGTCATGCCGGCGCCCTGTAAAAAGCTCACCAGCGACATCATGGCGAGTCCA  
GGTCTCGTTTGGCGTCATGGCGCTGGATCAGCGAGAAAATCGGATTTCGCACTCGCAT  
CTTCGTCGTCCGCTGCTTCGACAGACGTTGCTCCGATACGGACCTAAGTTTGTGCAA  
GATTAAGCTTGCGTGAAGCGAGCTGATCTGCAACGCTATCCTCCTTGGGACTGCGCT  
TGCGCAGCTGTAATGGAATTACGAGAAGGTGAGATGGGCAACAAGGCAGTAGCGCT  
AAGTGCAGCCGCACTGGCAGTCGTAGTAGGTGGCATCATCTGGACGCACGAAGCAC  
GTAAGGACGACGAAGGGTCAACGCAGGGCATCTCCCAGAGTGAGACTCCCAATGCA  
GCGAACGAATCAGTCAAAGAACTGGCCCCGTCTCAGTCGATTGAAGGCGGGCGTCGA  
TCTTCGGAATGACTCTCGTGTTTCGACATCCGTTCCCAGAAGTGCCGAGAACTAGAGA  
CGGGATGAGCTTCGATAACGATCCTGGCTATGCCGAAAGCAAGGCCGAGCAGAAGT  
GGCTGGATCGTCATGGTTATCCCAACGAAAAGCAGCTAGAGGCTTACATGGTCGCCC  
CGGAGGCCCTGCTGAAGCAGGCATCGGACGCGGGTGATAAAGTCGCTCAAACGATC  
TTGGATGCACGGTTGTTGCCTTCAGACCCACGGCGCAACAGCGCTTGGTGGATGCT  
GGAGCGGAAGGAAACCTCTTTGCTTTAAACATGCTGGCATCCTTCCAAGGCGGCAGC  
GCAAGCGGTGATCCTGTTGCTGCGTATGCCGTGTGCGGTGTGGCGGAAATGCGTGGA  
GATACCCGTGCCTCTGTTACTCGAGAAGTGATGATGTCTAAGTCACTTTCAACAGAG  
CAAAGAATGCTCGGGGAGTCTGAAGCCCTGCGACTCAATGCTGAAATAGATCGGAT  
CTATACATCCAAGTATGGCAGTGCACCGGTATTAGATAAGCGCCCGATCGGTCAGTA  
GGTTTGTGTGGTTAATTGTTTTTTAAAAGGAGTGGGGCGTAAATGGGAATTATGAAT  
AAAGCTGGCGTCGCTGCGATGTCACTGACGGGACTTATGGGGGTTGCATTCGCGTGC  
TCGGAACCTCCCCATGCCGCCACTGGTGCCCATTCAGGTGCCCTTGACGCAGCTGCCA  
AAGTTTAGCGACAGCAAGAATCCTGCCAATGCCCTTTTTATGGACAGGCTTGATTGC  
GCAGCGTCTAAAGTGCTGGGTGAGGGGAATTGGGTACAAACT

>CONTIG\_277\_length\_1456\_cov\_12.649360

GCCGAGTGCCGGGCCCCGCATCATCCGCTTCGACCTCTGCCGATCAAGCGCCTACTCA  
GGCTACTGTGCCGACGCAGCCGCCGGCATCAAGTGAGGTGGAAGGGCTGCGCCTCG  
GCGACCGAGGGCAGAAGGTCGAGTTCTTGCAGTATCGCTTGCAGCAAGTGGATGCC  
CGTGGTCCAAACGGTCAGGCCGTGCCGCAAGACGGGCACTATGGTCCGGAGACCGA  
ACATGCCGTGAGGCAGTTCCAGCAAGACCAAGGTTTGCCGGCAACAGGCGTTGCCG  
GCCAAGACCTGGATGCAGCGCTGGCGCAGGCACAACACGCGCGCCGAGAGTCCTTG  
AAACCCACGGAGCCGGCATTGGCAAATGGGGCGGTGGAGCAGGGCAGCGAGCAGC  
AAGCCCGAGTAGGCATGCCACAGAACGATGCGCCATCGGCTGTTCCATTGCAGGTA  
GAGCAGCAAGAGGCGATGCAGGCCTCGTCGCCGGCAATTCCAACGCAAAGCGAAGT  
GCCGGCACAGATCGTTTTGCCTGAGCGCACGTCGTCCTCCTATGCGTCTTACCCAG  
CTTTGGTGGTGCAGCCTCCCGCTCAGACGCACGCGAACACGATGAGGATCAGATCG  
AGCAAGCAAGGCCCTCCCAAGATGACGCTCAGCAGGCGTTTCCCTCTGATCATCGG

GATTACGCGTTGTTCTCTGCCATCCAGGCGCAGCTCCCGAAGGGCACATCTGATGAG  
AAGACGGCCGAGGTGCTGCATGCCGTCAAAGAGTCAGGGATCGAACGCGCGGATGA  
ACTCCGGAACGTGACCATCCAAGATGATGTCGCCTTTGTCTTTGGCAAAACGCCGGG  
CTTTCATTCGGAAACCTCGCTCAACACGCCATCGCCCCGGCATCAATGAGACCTTGCA  
GAAGACAGAGGCAATGGATCAGCAGCGGGCGCAGGAGATGGTGCAATTCCAGCGC  
GAGCGCGAAGAAATCGACAAGAACCCAACAGGTCCCGTGATGACGCTTGCTGCCCCA  
CTCTCAGCAGCAGGCGATGTCTGGCGGGCGATGGAGGCGGTGGTGGTGATGGGGGCG  
GTTGAGGCGGTTGAGGCAAAGATTGCCTTCGTCGCAGGACTGCCGAGTTTGCAAGC  
AGAATGCCTTGACCTTTCTTTATGTCTTAAGAGATATATGAGAGCTAAGAAGAGAGT  
CGTTGGACGCGATGCGAACGGACAGTCGCGGGTTTATGAATTGGCTTTGTACAGTTT  
TAATTAATATTTAAATATGCCATTTTCAGGTATATCGATAGAGGGGCTCGCGAAATCGA  
AATTTCTGTGGCGCGGACAGCTTATTTCAAACAACAAGCAAGAGCGCACTTATGGTTT  
CTGCTTTGCAGAAACCGTGCGCCAACGCTGCGCGTCGGTGCGGTGGCTTTCGCCACC  
TCGTTGCCTATGCTTCGCTGGGCAACACAGCCACTTCAAAACCTCGTG

>CONTIG\_278\_length\_1429\_cov\_9.754224

ATGTCGTGCAGCGTGTAACGCTGCCAGCGGCCACCGGCTTGCCGGGGTTTGCCCACA  
AACCCGGTGCGCACGTGCGACAGGTAGAGCAATGCCACGGACATGGCCAGCAGCGA  
ATCGGCCCCGTCCGAACGCAGCGCCCCGGACCCGCGTTAATGCCTTTTCCAGGGCATA  
GCCGGCCACGATGACGTGGCGGCTAATCCGCATCCACAGGGAGCCTCGTCGGTGTT  
CCAGGCTGCGCACCCAGCGCTTCGCGTGTGGCATCGAGGACGGCCGGCCGGCGCTTC  
TTGCCGGACGGCGGCTTGGGCTGACGCCAGCGCACACGCTTGTGCGGGCCGGCCGCT  
GGTGGCGGTTCGGTTCTGGGCCTGGTGCGTGTGGGCCTGTCTCTACTGCTGGCATGTC  
CCGCGCCGATGAACGGCAGCGGGGCAAGGTGTTTCGGCGTTTAGGCCTTTGCATCCTT  
TTCCCTCTTGACGGCTTCGCCGGCGGGATTAGGATGGGGGTATCACTTGTGCCCCA  
TTGGTCTGGTGTGTCCCGCCAGTCCAGTGATGAAAAAGCCGCCTCGCCAAAGGCGGT  
TTTTTCGTTTTTCGGGGGGGTCTACTGCGCTAGCAGCTGGCCCACCCGCGTTGTCATAT  
CGCTGCCAAGTATCGGCGCGCAGCCCTTAAACCGCAAGCAATCCCCGTGTGCACAA  
CCATTGCACACCGCAGCTGGCATGCGTTTTGCCCTCGCACCATCACTTGGCCGGCAT  
ATTCGTTGGGGCTGTTGCTCGACATGGAACGCGTGGTCTGCCGGCGGAATGCGCCGG  
GGATCAGCGCCGGCACTACCAGGACGCCATGCGGGCGCTCTACGCGCCTTCGATCA  
CCGGGGGCATGCGCACTGGCAGTGCGAAGTCTGCGGCCAGCTGGGCGGGCCGCCTCC  
AAGGTGAGAACGTAGTGACCGCCGGCAACGACCAGCGCAGCCACGTCCGCCGATAC  
CGCTGCCGGCGAGTAGATGAAGACATCGAGCGCCGCCACGCCGCGCACGGTGCAAT  
ACGCCGGGCCTGCCACGTGCGCGACGTGTGCAGCGAGGTGGACGCCAAAATGCGGC  
TCTCCGTTCTCGACCTGGTGGCGCACGTGCAGCAGCAACCCGGTATGGGCGGTGTGA  
TAGCTGCCGGTGCGGGCGGGGGCCATGCTGGATCTAGGCGTTTCCATGTTTCGGTTCC  
TTCGATTTGCTCACGGTGTGCACAACCATTTGCACACCGTGAGCGTAAAAAAAAGCTG  
CCGCCGAGCTGCTAAATCACGCGTAACTTGACCAGTATTGCGGGCGACCGTCCCAA  
GGGTGGGCGTAGCTGCTGCTGGACAGCTTGACGCCATTGCGGGGGTTGACGCGCTTG

CGGATCGGCTCGGCCTTCGTGTACTGGCCTGGAACCGGGGTGGTGGTGCCGGACATG  
TTGCCGGTGTCTT

>CONTIG\_279\_length\_1425\_cov\_154.817411

TGTCAGCCGACATCACCGACGAAGCGGGTCGCTCTTTGTCCGATGAGACGATCAAG  
CGTGCGCTCACCCGATCAGAAGAGCTGACCAAGGAGCAATTGCAGACGCATGACTT  
TTCCGGCCAGCGCGAACGGGAAGTACGCGTCAAGTCGAAGAAACGAGCGGCGCG  
ATGCAGGAAGTCGCTCGCAAGATCTCAATCTTGGAAGAAATACGCCAAGAACAA  
AGAATTGTTGAAGACCATTGAGCCGCTGCTTGCTGAGAAGTATGTGTCCAAATACAC  
CTACCTCACCTACGAAAATGCTCTCTTGATGCAGAGGCGCAGATCCAGGATGCCCCG  
CGCGCAGCAGTCCACACTTCGCAATCAACGTGCCGCATTGCTGGGTGAAATCACCG  
AGATAAAGACAACCGCCAGCAGACAAGCGAGTGAAATCGAGCGCGAGAAATCCAC  
GATCGAAGATCAAGTGGCAAGAGCCAAGTCCGATCGTCTGCAAACCATCACCTCAC  
CCTTGAGCGGCACCGTTGCAGCAATCTACGCATCCCAAGGTCAGCGCATTGGCACCG  
ACTCGATCATCGCGTCCATCACCCCAAGCGAGTCGGTGTTTGAAGCTGAAATCCTCA  
TTCCTTCAAGAGCCATCGGACATGTGAATGTCGGCACCGAGGTGCTGCTCAACATCG  
CCGCATTCCCGAAAGCAAAATATGGCGCCATCCAGGGGCGCATCGCATCGCTGTGCG  
ACGCAAACGAGTCCCCTCGGTGAGTTGGAGCGCCGCTATGGTCGCCAGTCGCCCAC  
CGAACCGGTTTACACCGCCAAGGTGGCTTTGCCTTCTCAAACCATCGGAGTCGCCCCA  
AGAAGCAAAGTCTTCTGCGGGGATGGAGGTGGACGCGGAGCTGATCTTGAGG  
GCCGCAAGATCTGGGAGTGGATGTTTGACCCCTTCCAAACCATGGGGTCGCGCTTGA  
CGGGTGAAAAGCGATGAAGGACGTCTTGACACCATCCGCCAATGGCGATGCCGAGC  
CGGATCGCTCTGCTGAACCAAGCCTGGTGTTCTCATCAAAGCGCCGTGTGCCGCATA  
TCCGCCAGACGGAGTCCAGTGAATGCGGCCTGGCCTGCATTGCGATGCTGCTTTCCT  
ACTATGGCCATGAACTAGCCTCGGGGAGCTTCGCAACCGCTTTACGGTGTCAACCA  
GTGGGGCAACGCTCGCTTCGCTGATTGAAATCGCTGATGCCAATGGGCTCACAACGC  
GTCCGCTTCGCTTGGAACCTTACGAAGTCCCAAGCTGTGCTGCCTTGTATGGTCCA  
CCTGCACCACGGGCACCTTGTGCTGTTGACGGCTGTGCGGGGCGGGCATGTGCACAT  
CAGCGATCCCGCAACAGGCGTCAAGAAGATCAAGCTCGATGAGTTCGATGAACTCT  
TTAGCGGCATTGC

>CONTIG\_280\_length\_1410\_cov\_17.885425

TATAGGCGCGCGGTTCCGGTGTAGGTGAATTGCAGCGAGGACATGTGCAGCGCGCCG  
CGGTGATCGCGGCGGAACAGCTGCCACGTCACGACGGTGCCGTTGTCGTTGGGCGT  
GCGGCCCCAGCACAGGCCGCGTTTGCGCTTCGGCGCGCGGCGGGTGAGGTGGCGGG  
TCATGCGGCGACCTTCTGCCGGAATGCCTGGATGGCCTCAAGGTTGGCTAGGTAATA  
AACGCAGGCGATGCGCTCCGCTTCACTGAGCTGGCGGGGATCGCGCGCACGGATGC  
TGGTCCGGTAGCCAACGCTGAAGATCATGCTGCCATGAGAAGGGCCGTAGCCGTGG  
GTACAGTCACAGCGCTGGCCGTGCCAGTGAGCATAGGACTTTGTGCCGAAGTACTCG  
CTCCAGAGGCTCTTGTGGTTCTGCTGCGCACCGGTAGCTATCTCGGCGATAGCATCA

GTGATTACAGAAGCCCGATCATTTCCGGCAGAGGCGTACACGCCGTAGACGTCCAG  
CACAGATTCGGCGATTTGGACTTGATCGAGGTCGACCCACCGCTGACCAAGTGCAT  
AGCTTCCTGCGCCGAAAGGATCTCTTTGCGAATCCTCGCCTCCTCCACAGAAGATGC  
TTTCAAATGCGCAGCCAGTTTCATTCCAAGCCGGTGTCTGGCGGGCGGCTGCGTCAGC  
GATGTTGGTATAAGTGGTCATGCCGCATTCCTCAGCAGGTGAGTGCCTGACCCGGG  
CCGTGCCACAGCGCAGCAGCGTTGTTAAGCCGGATCTGCTCGGGATCACGGCGGAT  
CGGTGCGAGCCTGGTCTGCGCCCGCTTGATGTCGTTCCGGCAGAGCACGCAGACGTT  
CAGCACGCGCCCGTTCTGCACTGGGAACCTCGGCTTCATCCAGGCGGGCAGTGCAGCT  
CGTGCAGGTGCGCAACATCAGGCGGCCTGCTGGTAGCTGGCGTTGGCCGCACGGGC  
GAAGACCTGCTGCATGGCGGTGAACATGGACGGCAGTTCCGCAGCGTCGTACAGCT  
TCGAGGCGCGCTCGATGGTCAACGGCAGGAAGCCGAGCTGCGCCAGGCCATCGGCG  
GTGATCGTCAGCGGTGCGATCTTCGCGTTGATGTCGCCGAGCTTGATGCGCACGACC  
TGCGCCCGGTGCTGACGCTGCCAGTGAAGTACCGCCTGAGAGAGAGCGGGGGAGAG  
GGCAGCAGGAGCCGCCGCCACCGGTGCCGGCGCCGACGCGACGACCGGGGCGGGA  
GCTGGGGCAGCAGCGGGCGCGGGCGCTGGTGCAGGCGCCGCAGCAGCGACACGTG  
CTGCCTCGGCCTGTGCATCGGCGCGGGCGCTGTTCTTCCTCGCGCTCCTGCTGCTCGCG  
CGCCAGCTTTGCCGCTTCCTCCTGACGAATCTTCTCGCGCTGCGCTTCCAGCCGCT

>CONTIG\_281\_length\_1406\_cov\_11.476935

CTTCTTGTGTGGCCGCTCACCGCGCTTCACGGCCGCGCGCGCGGGCGCGACTCAGGAC  
GGTACGGATCGCCCGTTGTTTCGCACGGATTGGTCGCATGCTTGAGTCGATGTGCGGT  
CGACAGCACGGCCACCCGGTGGCGGACCGTGGCCAGCGTCCACGGTCCGAGCTTG  
CTTTGAGTCCCGCTGTAACGAGAGCCTGATCGATAGTCGGCGGCAGCTCCCAGGCCA  
GCTCGCCCTCGGCCGAGCGCCGCATCACATGATCAACCACAACTGCAGCACCGTT  
GCTTCGGGAGAGGCCGCGACAAGCCTCTAGTGAAGGCTACTGCGCAGAATCACGCC  
ACTTCGCATAATGTATAGTCCGGGGTTCGCTGGAATGCTTTTACCACCGCCTCAGCG  
CGCACGGGCAGGGCGAGCGATACCCCTATCGCTAGGGTCATGGCAGTCGCAGCCAA  
CTTGCGCCATACGGCCTTTTCATCGGCGCTGATAGCGCGCGCCTCCCCGACAATTCC  
AAGCACCTTTGCGAGTTGGCTCGCCGGTCCATCCGGCTATGGCAGCGCACGACACAG  
CATCAGGCGCAGATAGCCCGCTTCGCCATCTGCTCACTGCGGCGCGTCCGACGTTCA  
TCTTCTTCGCCAACTGATTGTCTGATTCGACCCCTAGAACCGTTTTGCACCGGTCCAG  
CAGGGTGTTACGCTATCCATGTTTCAGCCCTATTGACATGTATGTTTCAGGGGACT  
ATACATACGCCCCGATGTTTCATGGCTTGAAACATTCCCGCCCCCTGGTACCCCCCAG  
GGGCACGGGTCAAGGGTAGGGGTAAAGGGGATACACCATGGAATTTCAAGTTCAGTA  
CCGCTACGAGCGCCGCTGGGTTGTGCTCGCCCGTTTTGCTACTCGCAATGAAGCGCG  
TGATGACGTTGCCGAGCGCATCGCGTTCTTTGTGCGCCGATGGCTTCAAGCACGGCGA  
TGTGGTCCGCGACTTCCGCGTGCGCGGCGTCTCCAGCAGGTGGCCGCATGACAGGC  
CTCATCGCATTTTCGCTGCTCGGTGTTGCTGCTTCGTGTGCAGCATCGGCACCGCGC  
GCCTCGTCGGTTGGATCTTGATCGCCGTGACGCCGCCATTCTTCGCCAGCTTCGCG  
AACAGGATCTAATCGCCGCCGCTGAGCGTGAGCATGACCGCGCTTTATTTCGATTACG

TTGATCCCGTTGCAGCTGCTGCTGAGGAACGCGCTGATCGTCTCAACGACGCCACGA  
TGTGCGAAGCGGAGTGGTCACGATGAGCCGGGTCAGTTATGCCATTCGCGTAGCCG  
GTGAATTTCTCAGCCAAATGCCGTGGCCCATTTTTTTCGGCGTGATCTTCGGTGCGGT  
CGTTGGTGCGTTCTTTGGCATCAGCACTGCTCACGGCATCAA

>CONTIG\_282\_length\_1404\_cov\_4.573218

ATCGTTGACCAGGACTTCTTGGCCATTCCGGGGAAAGAGGTCCGCGTGCGGGACCGT  
TCGATGGTCGAGTCGTTGACACTGCGACGTCCCGAGTTTTTGCCGCCCCTGAGATC  
AAGGTAGCAATTACCAAGGTTGTGACCGATAACCTCGGCGCTAGGCCGGACGAGTT  
GGTGTGATCGTATCGCGTCAGCTTGGTTATCGGAGCACTAGCGCGCAGCTTCGTCA  
GCTCATTATCGATTGTGGCGATGATCTCATCGGGAATGGCTTCTTGATCGATAAGGA  
CGGCACTTGGATGTTGCGGGGCTTAATTTAATAAGATGAGATAATAATGATACCACT  
GATCCAGGATTTTATTAATAATTTTAAGCCGCAGTGGTCGAAAGAACGAGAGCAAG  
CAAGGCTTCTCGCATTGAGAGTTTCTCAGCTTGATAGTGAGGTTCTGTCAGTGCCTG  
CGGCGATTTTTTGGTGAAGGAGGGCAGTTTGGTCTTGTTGATTTCGCGGATTGAGGATG  
TCGAAGGTGATGTCGGTGCTCTAAGGGAGGGTTTGACTGAGGTTAAGAATGAATTGT  
CGAATCAGGCGACTTCATCTCTGCGTGTTGGAACAACCTTATTTAATGTGATCCTTA  
GTGCTTTTTTTGCGCTAATTTTTTTTGGATCTCCTGTGGTTTTGAATGAGGCTGAAAG  
TCGAGCGGTCTTCGATTACTTCCTTTATATTGGTCCGGCTGTGTCTGCAATAATTGCG  
GGATTTGGCCTGTATGTTTCGAAGGGAAAGCGAATTTTCGGAATTGGTGTTGATGGG  
CTATTTTTCTGCGTCTCCGCATCGTTTCTATTCTGTGTGTCGTTGCCTACGCCTTTTC  
AAAGGGATATTTGGCTACGATGCTTTCCAGTCTCTGGGGGTTTTCTTGCTATTGCCG  
CTTCTATGGATTCTGTGTCGTTGATCGGAAAAAAATATCAATTGGAATCGTGTCC  
TTTCTGGTGGTTTTTCATTTTTTGCTGTAGTCTTTGCGTTTCGCCTGGATCTATGTTGTCAG  
TGAATACAAGTTGGAGCGGCCTGGCTTAATTATGGAGGCGGTGATAAAATTTTTGTT  
TAGTCACTGATGTGAATTTATCATGACCGCTAGCATCAGCCACCAAGCAAGCACTGT  
GATGATTATCGAGAGTATCAGCGCTATTCTTGTCAGGCCCTACATCGTGATTTTTTA  
TTTTCTTGGTGCGGCTTCTATTTCATTTTCATAAATTTCCAATAAAATCAATAAATAAC  
ATTATTTAATTTTAAGTCAAGATATTGGTTATTGGTAGATTTTTTGATTTATTTTTGTT  
ATTTTTCTAGGCAGGCAATTGCGTGGGACCAGCTGCGCACGCAGTTGGTGCGCGCGA  
TGAAGCTTTGGCTTGCGCTTGGAAGC

>CONTIG\_283\_length\_1402\_cov\_5.178824

CAATACACGACCAAATCCGCCGGCTTCGGGCGCTCGTCGTCCCCCGTGGCCAAGCC  
AGGGTTAAGACGGTTGACTGGGCGCAGCGCAGGCACGCGCTCGTCGCCAGTTCCGG  
GTTTTCGGACTCGGAGAGCATCAAGGCTATTTCCGGTGAGAGCCGGGGCGCGTCGG  
CGCTGGGGGTTGGTTGAAGCTCGGTCATGGCGCGGGGCTCGGTGGGGGATGGCTG  
GGCAGCTGCGCGCAAGCGCGCCGACGATTCTTTGCGACGTTCCAAAAGCGCTTGCG  
CGTGCAATGCCTGCTCGTCCACGTGAGCCAAACGGCCCTCCGCAGCGGCCTGGGCCT  
TGAGTGCTTCGAAGCGTTTCGGTGTGGGCGGTGACGCGGCTATCAGCCGCTTGGCGGA

CGCGGTCGTTCCGCCTGGCGCGCGGCAAGCGCTCGCCACGGCGGGCGGGCTTGCGTG  
ACCGCTTTGCCTTCGTGCTTGGTCGCCGGGCGGTCCAACCTGGCTGCCGTGGCGAAA  
TCATCTTTCTGGACGGCGTCCGCCTGCTGGCTCAATAGCGAACGGTGGTCCACGCGG  
GCCACCACGCCTTCGCTGGCCAACATGCGATTGACGGACGTGGCCCAGAACTCGCG  
CTCCGTCTCCGCCAAGGTCGGTTGCTTGGCTCGTTTGCAGGCAATCGGGTCCAGCGC  
CACAGCCTTTTTCCCCAACTTCCGTCCGGGTTGACGCTGCATGCACTGAGCAGAAT  
GTGGGCGTGGTGATTGCGCTCGTCCCCGCCCTTGCTCGGTTTCGTGGATGGCCACGTC  
AGCGGCCACGCCGTAGCGCTCGGCCAAATGGCGGGCAAAGCCATGCGCCAGTTCTT  
GGCGCTTCTCGGCAGAGAGCTCGGCAGGAAGCGCCACCTCCACCTCGCGGCAAGTG  
ATGGCGTCTCCGCGCTTGTGATGGGCCTCAACCCGGTTCCAAAACCTCGGCCCCGGTCT  
GCGGTCTGTTCCCGGGAAGGCAGAGCGCGGAAAACGCGACGCCTTGCGGACGCGT  
GTAATCGTGGACTGTTCCGGTCAAGGCGTCTTCAATCCGCACCCCTGCACGATAGGC  
AGCGCCAGCGGTGGACGAATGTCCCCCTGAGCGCGAGTAAGCCTTAGCAGTGAGGT  
GGTAAATCGCCAATCCGGTCTCCGATCGCAGCCCCCTGGGGGGCGAGAAATGGGGG  
GAGAGGCGTCACGCGAAGCGTGGCGTTGGGGTGTCGGGGGGCGTAGCCCCTGACCGC  
ACGTAATCCCGAAGGGATTACTCTAAGTGCGCTCTTGTTGTTTTCTTTGGGCGCTTCG  
CACCCGCATCAAACCTCAAGAGAACCGGGGCTGCTCGCTGCGCTCGCTGGCCCCCTA  
AATCAGAGTTACATGCACAACGGAACGTGCAAGTTTTTAGCCAAAA

>CONTIG\_284\_length\_1393\_cov\_33.132701

CGTCTTACCGACGTGTTGCGCGGCATGGCGATCGCCGAAGAGATCATGGACATCCC  
GCCCCGAGGCGCTGCAGGTGCTGAGCCGGCTCGCACGGCCATCGAGGGACAGGCCG  
ACAAGCAGCAGCTGCCGCTGTACTCGGAAGCCGACTTCGCATCGAACCTGCCGAAG  
TGGTGGGACATCGTTGCCAACGGCAAGAAAACCGCCGATGACCTCATCGCGATGTT  
GCAGACGCGTGCGCGCTTCACCGCCGAGCAGCTGAAGGAAATCCGCAATCCGCCAA  
CCGATGTGGATGAGGGCCACGAGCAGAACGACGTCCAGGCCGCTGCTGGCGGCATT  
ACCCAGACCGCAGTGGAGCGTTAAGCATGAAGACCGTCAACTTGATCCAGGGCACC  
CCGGAATGGCATGCCCACCGCGCCAACCACCTCAACGCGAGCGAAGCACCGGTGAT  
GCTCGGCGAGTTTCCGTCCGTCACCCGCAGCGAGCTGCTGAAGGTCCGCGCGACCG  
GCGTTGAATCGGAGATCAGCTGGTTCCTGCAGCAGATCTTCGATGACGGCCATCGCT  
TCGAGGCGCTCGCGCGACCGCTGGCAGAGGCGATCGTCGGCGAAGACCTGTACCCG  
TGCCTCGGCGTGATGGGAAGCTGTCTGCATCGTTTCGACGGCCTGACGCTGCTCGGC  
GATGTGCTGTTTGAGCACAAGATGCTGAACGCCACGCTGCGCGCGTGATGACGGA  
AGGCTGCACCGGCACCGACCTGCCTGTCTATCACCAGATCCAAATGGAACAGCAGC  
TGATGGTGTCCGGCGCCGAACGAGTGCTTTTCATGGCGTCGGAGTGGGACGCCGATG  
GCGACCTGATCGAAGAGCGTCACTGCTGGTACGTGCCCAACCTCGAAGTGCGCCAG  
CGCATCGTGGCCGGTTGGGAGCAGTTCGAGCGTGACGTCTGTTTCGTACGAAGCCACG  
GCGGCCATTGCGCCTGCAGTTGGTCGCGCTCCGCAGCACCTGCCGTCAATTGCATATC  
GCTGTCACCGGCATGGTGACGGCATCCAACCTGGCCGAGTTTCGTGGCTCGGCAATG  
TCTGTGCTTTCGCGCATCAACCGCGATCTGCAGACGGATGAGGACTTTGCCGACGCC

GAGCAGACGGTGAAGTGGTGCAAAGGCGTCGAGGATCGGCTGGAAGCAACCAAGC  
AGCAGATCCTCGGCCAGACCGCTGACATCGACGCGGTGTTCCGGACGATGGACGAC  
GTCGCGGCCGAAGCGCGCCGCGTGCGACTGGAGCTGGACAAGCTGGTCAAGGTCGA  
GAAGGACAACCGCCGCACCCAGATCGTCGCCAACGGCGTGCAGTCGGTGCGGGATC  
ACTACGCGTCCATAAACGCGGGACTCGATGCGCATGCGCTGG

>CONTIG\_285\_length\_1393\_cov\_31.466825

CCAGCGCATGCGCATCGAGTCCCGCGTTTATGGACGCGTAGTGATCCCGCACCGACT  
GCACGCCGTTGGCGACGATCTGGGTGCGGCGGTTGTCCTTCTCGACCTTGACCAGCT  
TGTCAGCTCCAGGCGCACCCGGCGCGCTTCGGCCGCGACGTCGTCCATCGTCCGGA  
ACACCGCGTCGATGTCTGCGGTCTGGCCGAGGATCTGCTGCTTGGTTGCTTCCAGCC  
GTTCTCTGACGCCCTTGCAACCACTTCACCGTCTGCTCGGCATTGGCGAAGTCGTCGT  
CCGTCTGCAGCTCGCGGTTGATGCCGCTCAGCACTGCCATTGCCGACGCCTTGAAGT  
CGGCGAGATTGGAAGCGGTACCATGCCGTTACGGCGATGTGCAGCGACGGCAGC  
GTGTGCGGTGCGCGGCCGCTGACTGCCGTTCCGCTTTTTTCCACATGTTCTAGGCG  
GCGACATCGGCCTCGAACTGCTCCCAGCCGGCGACGATGCGCGCGCGCAGCTCCGC  
GTTCCGGCGTGTACCAGCAGTGGCGCTGCTCAACCAGCTCATCGCCGCGCCACTTCGA  
CGCCATGAACAGCACGCGCAGCGCGCCGCACACCATGGCTTGCTGCTCCATCTGCAC  
CTGGTAGACCAGCGGCAGATCGGAGCCCTTGCAACCGTCGACCATCGCGCGGCGCA  
GATCGTCGTTGAGGCTCTTGTGCTCGAACGCAGTTTCCTCAAGCAGCGTCAGGCCGT  
CGAAGCTGGCCGAGTACTTGCTTCGGTGCCGACACACGGGTACAGATCCTCGCCG  
ATGATCTGCTCTGCGATCGGACGGGCGAGCGCCTCGTAGCGGTGGCCATCGGCAAA  
GCGTTGCAGGGTGGCATCGTCGTGTTCTCACCGATGCCGGTGGCGACTTCGCGCAC  
CAGCTGAGCGCGTGTCTTGTACGGGCTGCAGCCAAGCATCGCCGGTGCTTCGCTGGC  
GTTGAGGTGGGTGCGCGCGGTGGGCATGCCATTCCGGCGTGCCCTGGATCAGGTTGAC  
GGTCTTCATGCTCAACGCTCCACTGCGGTCTGGGTGATACCGCCAGCAGCTGCCTGG  
ACGTCGTTCTGCGCGTCGCCCTCATCCACATCGGTTGGCGGATTTCCGATTTCTTCA  
GCTGCTCGGCGGTGAAGCGCGCACGCGTCTGCAACATCGCGATCAGGTCATCGGCG  
GTTTTCTTGCCGCTGGCGACGATGTCCCACCACTTCGGCAGGTTTCGATGCGAAGTCG  
GATTCCGAGTACAGCGTCAGCTGCTGCTTGTGCGCCTGTCCCTCGATGGCCGTGCGA  
GCCGGCTCAGCACCTGCAGCGCCTGCGGGCGGGATGTCCATGATCTCTTCGGCGATC  
GCCATGCCGCGCAACACGTCGGTGAAGACG

>CONTIG\_286\_length\_1386\_cov\_3.615568

TTTAAGGGAATATTCAGCCAAGTGCAACCTCCGGCCTGCGGCAGCGTCTAGCACTTG  
GCTCTTACGGAAGAGCTCGTCATACCCATCCAAGCCAGAATTTTTTGCATTACACGG  
GCGGCTGATGATAATCGCAAACGAACTTCCTTACGCTAAGGAGCGACTTCTTCCCC  
CGCAATTTCGTGAATCGATGGGATGAGCAGCATCGGACACAAGCTTATCGGAAAAAT  
AATATTCCTCCACCCCTTCAGCATCTGAGCACACTGAGCCGAAGACTTTTAAGATTAA  
CTTAGCATTTCAAAACCAGCAGCAAAAAGTCTTTTCGCTGTTGAGGATCCGCCAAGA

AGTCGACTAGGACGTGCGGCATAGCCACTCGCCGGCGCCCCAATGGCTTTGGCTGTT  
CCGAATCAGCTGCTGCATCTTCAAACGACTTCAGCCAATCACTAACATGGCGATCAA  
TCACTGGACTAACAGCGTCATCCGCCCAGCGCAGGAAATCTGTATCACCAGCCAACT  
TGGCAAGAGTAGATAGGCGCTCGCCCCACTCAATCGTCCCGAACTGCGTCAGAGCT  
GAGGTTTCACTCATCCTACGAACAACATCCGCGAAATGATTATTGGCACCCCAGAGC  
ATCACTTCGTGACGCTTAGCGTTCTCTGACAACATGTCAGTAATGACTGACCCGACA  
CCAAGCTGCTCGATACTCCGCATGTAGGAACTGTCAAGCGATGCTTCATACGAGCGT  
TGATAAGCCGACAACCTTTCGGTCCGCGCCATGAGTTTCTCGACCTTGGACCCCACA  
GCTCCAAATGATTGAAGCGGAGCGAGTGCCTTAGCACTTAGCGATTGCGAAATGAGA  
AATCTCAGAGACCTGCGACGCGAAACGATGAGCAGATAGCCCATCCAGCATGTCCT  
GAACCGACTGCAAAGGTTGGACAGCAGCCAACGCCCTATCCTGCATCTCCTTGTAAG  
CGGACATCTCAATCCCTTTGGCATAGTCGCGTAGGGTCTGTGCAGGATCGCGCATTC  
GGAAAGCCTCCCGAATAGGGTCACTGAGTGCCATGGCTCGCTGCCTTGACCCATTCA  
ACACTTCTTCTAACATCTTCCCTGGCATGATCGCCCTCGCGTTAAAGGGAGGCTCTG  
GAAAACCTGGACGACATGCATCCTCCCAAAAGGATTCAACTGAGTGCAGGCGGCTAC  
GACTACGACTACGACTACGACCAAGCTTATGGAAGATCTAGTCAGACAACAAGGAG  
CACGCTCAGTGGCAGACATCAAGGTCGGACTCAGCTAATGCTCAGCGCTGCCTATGT  
CGAACTCCATCAGTAATTGATCAAGAGAACCAAGGCACAGCCTTGCAGATCCCGAC  
GCCATAAGCTCCGGTCTCTGTCCC

>CONTIG\_287\_length\_1381\_cov\_29.252791

CGCCAGGAGCCGGGTCTGGACTGATCCAGACCGTGCTCGATCTCCTTAACCTGGTTT  
ACCGTGAAGTCCAAACGGTCCGTCCTCAGCCAAAGCGGCCGTTGCCATCATTGCGA  
ACGTCAGACTTGTCGGACGTGGCGATAAAAAAGGCTTTCCTCGCGTCCTCCTTAACG  
GTCGGATCGGGGAGCTTATGGAAGTAGCCACTGTCAAACACGCCATCCCACGCCTT  
GCGTGCCTCAGACCGCGTGCAACCCTTTTCCAGGATCGCAAGTTCTTCAAGTGCCTC  
GCCGAGCTTGTCGCCGAAGAAACCGACTTTTGCGTTGCCTAACTCAGCCAAGTTAGA  
CGCATTACCCGGATGCGCAACTTCGGTCGATTCGCTCAGCTGCGCGTGGAATTTTTTC  
CATGTTTCCAAGAGGGCTTCATCGTCGCGACCAGCCGAAGACACAAAGTTGTCTACT  
ACAAGCTTGTAATCACGATCCCGCTGGTTGTCTCATCCTTCCAGTCTTCACGACTAC  
GTGCCTGCCCCCTTGTAAGACGCGTGATGCGGCGCATCTGCTCACCTTCTTCGTGCTT  
CGTTTCGTTCCGCGTCGAGACCTCCTTCCGGAACCACCATGTGGTTCGCGCGTGCGTC  
GGATGCGTCCCAACTGCCATCACCCGCCAGTTCGAAGACCTCCCGCTTGCCGCCTTG  
GCCATCATCTTCTTTTCGGATGCGATAGACCGGCATGTCAATGTGATAACCTTCGCT  
GTAAACTTGCCGCACACACTTGGGGAACACTTCCGCCGGGTAGCGAAGCGGTTGTC  
GCGCGAGAGCGCCGCGCAGACCCGTTTCTTGCCCTCTTGCGGCGTGAGCGGCAAGC  
CCAGTTTGTGACGAGGTCGTCTTCGGCGAAGTAGATCCCATCATCAATGTCGTAGT  
CGCAGTCTGGATCCTGGACCATCGTGTGCATCTCGTAGGATCCCTGCGTGCAGGTGA  
TCTTCGGCTGGGGATGCTCTTCTTCATCCAGCCCGATCTCCAAGCGACGGCGACCGG  
TATTGCGTCGCTCGCGCATCTCGTTGCGCTCGTCCGTGCTCAGGTTGATCTTGTCGCC

ATGAAATTTCTCCATGTCCTCGCCACAGTCAAAAACAGTCATTACCTTCTCCTGTCTG  
ATTACAAAGGCCATCGATCAGTGCTGCGCGAAAGTGCGCCATCTCGCTTCCGGGCTT  
GACCGACTGAGCCCATGCGTAGTCGACATCAGAGGTCGCCTGACGGCGAAGGGCGT  
TGAGCACCTTCGGCCTGGCGTCATCCATGTTCTGGATGTATTTTCAGGAGTTGCTCGG  
ATGGACACTGAGCAGGCAAGCGGAACGCCATGCTTTCGTCCTTTCGCAATTCCAGGA  
TCTTCTTGCTCA

>CONTIG\_288\_length\_1364\_cov\_7.355699

CCGAAGATCCAAACGCGACTCTCCGGACCGACGCGACATCCCGCACTCTCAGGCCT  
CGTTATTCAGACCTTCCCTTTGCCACTCAAAGTCCGGACTAGTAGTGAGGTGTGCG  
CCGAAGCAGTAGCCCATGGTGTGAAAGTGCAAGTCAAAGAGGCCTATGAGTCCTTCT  
TAGGCTTATTGAGGACATATCTGGCAACTCTTCCTGAGCAGCTAATGGCTGATCTCA  
ATGAGATCACGGTAGACCTTTACAATAGTTTCAATGCGCATGACCACGCTGATGACT  
TGATCCATACGCTGCGCCTTCCACTAAGGGGGCGGTGCGCCGCTTGAAATCGCATTGCG  
CTCGCGAGCCGGATCGCTTCCATAATGCCTTGGCGATCTTGAGCGAAGGACATCTTC  
GGTGTCTGGGTCTTTCGATCCTATTGGCCCAGAACATCAAGCTTAAACTCCCGGCAG  
TCCTGCTTGACGATGCCGTCAACGCCATCGATCACGAACACCGGGAGGGCATTCGTA  
TGACGCTGTTTGGCCATTTCGGCATTGAAGGAAAAGCAGCTCATCATCACATGCCATA  
GCCCTGAGTTCATCAAGGACATCTTTAACAATCACACGAAGGGCGCGCCACTTTACG  
TCTTGCGTCATCATCAGGGTGACCACCATCCCGTAGTCTCGGGAGGCAATACACGCA  
ACTATATCGAGCGTGCTGAATCGCATATCGATGACTTTGATTTCGCGTGCGGCGCTTT  
CGTGCTCACGCCAGGCGCTTGAAAGTTTAGTTACACGGGTTTGGAAGAAATTAGCCG  
ATGTTGCCCCTAGTCTGGGAGAGCTCTCGCTAAAGACGCGACGTCCCGGCGCGCCTA  
CGGATCTGAGCAACATTGTCCAATCTCTACTGAGTGCTCTCAACAAGGGGGTTCAGCG  
TTGGCGCCTTGGACGGAGTCTGGATCACCAGACGGGATCACTTGGATGCAATCATCA  
ATGTCCGAGCGAATTCATTGGCATGGATGTCATTGAACAAGGGGACCCACGAAGAA  
GAAGATCGTGAGGATTTTCGAGGAGCCAACGCTTAGGCGTATTGTGCGAGGCACTACG  
AGGGCTCGATGTATCTTTCGGGAAATGAAATGCATGTTGAGCAGAGAAAGATGGTA  
AGAATACTGCGCCGACAAGTTGCAGCTAAATTAATAAAGACCGCCTTTGATTCATCT  
AAACAAAGCATTTCCAGGCTGCCTGCTCCGTCATAAGTTGACAGGGAAAACGCTTG  
CCTTGGGTGCGGGGAGGAGGCGACCTTTGAAAATTTTCAGGTTATCAATTCGCTAAGGA  
GTGCTAAGGAAGCTCTGAACAACGCACCACAGATACGCGACACTACCCGCCTCATG  
T

>CONTIG\_289\_length\_1345\_cov\_20.057471

CGCAGGATCCATACCGCCTGGATGCCAAGAACGAAACGCATCCGCCGCGCGAACCG  
TTTGAAACGGGCCGCGACTATGTGCGCGATGCGCAGACGGGGAAGTGGCAGCTTGA  
AATCAGGGAAAATATCGACGGCAAGATAACCAGTCACACGCAATGCCCCCATCAGCA  
CCGAGCGTGAGACCGCCCTGGAAAGCCAATCTCAGACGATCATTGCGCAGAACGCC  
GCCAACACTCCGGAAGCAACAGCGGCCCGCTACCAGATTGCCTACAATCAGTTTCG

CTGGAATGAGTTCGCCAATCGCGAACCGGTGCCCCAGGCCATCACGAACGCACGCA  
CGCAACCGCAGCCGTTACAGGCGTCCGACGGTCATTCTACACCCGCGACGCCAGC  
GGCGAATGGACCACGCCCCGGCACGTTCTATGGCACCAATGCGGGCACCGGCAACAC  
ACGCGAGGAATTGAACCGAACGTGGCAGAGCCAACAGGCCGGGCTTCAAGACATG  
GCGTCGATGGCGGAGGTGCCCCGACGCAATCCCACACCGACGCAGAGCGACTTGCA  
CAGCCAGGTGGCCGGGATGTACGCCCCGCGCTGGCATTACGCGCACTGACGCGCAGA  
TCGATGCAGCCACGGCGGCAGTTGCACAAGACCATGCACGCGATACGGGCAAGCAG  
ATGCCCTTCTTCTGTCAGCTGCAGAAAGATGGCTCAATCGCTACGGTGGTTGGCCAG  
AACGACGACCGCATGGAGATCAGGGCGACCACGACGGCAGCAGAGATATCGCAGG  
CAGAACGGCAGCAGGCTATGCCTGCCAACGCTCCTCAACCCAGTCCCCCTACGCAGT  
CGCCTCAGACACAGCAGCCTGCAACACCGCCTACGCAAACACCGTTACCCAGCGCG  
CCGTCGTCGCAGACAGCGCCAGGAAGGTCATCCTCGCTGGACGACGATCATGCGCA  
GGGGCGTACGCCGGCCACGGGCGCGACCACAGCACAGGTGCGCCGACCGGGAATGC  
ATATGGGTGCGCGCTCTGTTGCATCGCACGATCCTAGGGAAGACGAGCAGATATCTG  
TGAATCGTCAAAGCGCCGTTGGCCCCAAAGCCGCAAGACGCTGCGCTGATTGAGCAA  
CTACGCTCATCCATCGCAAGGCTCGACGAAAGCGCCAACAAACCATGGGATGAGCG  
CAGCGATCGCATGGTTGCGAGCGCGTACAAAATGGCAGTTGCGACGTCCCCCACC  
CTGAGTAGTGGCTTGGTTTAGAGTCCGGGGGTAATGATATCGGTGTTTGCCAGATGT  
TGGGCATAAGCAGCCGGGGTCATGCCGCCGATCGCCTTCTTGGGTGCGTCTCTCGT

>CONTIG\_290\_length\_1340\_cov\_11.798021

GTCCTGACAGATGCCATTTCTTACGCGCTTTCGCGGGCATGGCGCAGATCATTGAGG  
CAAAAGCTCTCACTGCTCAGGATGCCGAATTCGTTGGACGGCGGATCAATGAGATTT  
TGGTCTGGCATGGGCTCAGAAGCATGGACGAACAAGGCTGGGGTGACGTCGGTTGC  
CAATCGGTGACCTACTTTCACGCCCACTGAAATCGCCGCGATAACCCAGCTCACTT  
TGCTATTGCCAGTGCGGTGGACGACAATTTCTTGATTGGTCCTCTGGCTCGGAAGTC  
CTTAGAGTATGCGGCGGCAACCGCTCGTTCAGATCGATTGATCGCTTGGCTAGCGGC  
CGCCCTGAAACTTGAACGTAAAGCTAGCGGGCGGGTAGTGGAGTGGCCTTCCCATTG  
ATGGGACACGGGTGTGGCGTCCACCAGCGTCAACATGCCATCGGCCACAGGGACCGG  
CATACCCAACGTGAGGTCGATCTGCTTAGACCAGCCGCCGCCATCACGGTCGTCTCT  
GACGATCAACCGGCCTGCCACGACGCATTGAATGTGCGGCCGGGCAACGACTGTCCT  
CAATGACGTGATCGGGGCGCACCTTGGGCCCCGTTGACCGCCGCAATCTCGCCCAGA  
CGCACAGGGCCTTCGATGGGCGAGCTAGTGACGGGGCCAGTCGCTGCACACCCGAC  
AAGTAAGACGACCAAAAGGATTGCTCGCACCAGAATGAGCAAGTGGCGGAAACGTT  
TCATGGTTGTGGTCATGCTCGCGTGTTGTGGAGATAAAAGCTGATGTCCTCGGCGAG  
CTGCGCATATGCTTCGATCGCGTCAATGTGATGGAGCATCACTTCACCGTGATGCTT  
GCGCGCGAGCGCCAGCATTGCGGTCTCAAACCTCCAAGCTCTCAGCGGGTAAACCCA  
CCACCTCGAAGGCGGCGGCCAGGGCTCGATGGAACCGTTGCTCGTCGAGCGGATGA  
AAGGTGTGCCACGTCTCCACGCGCATCCACGGGTCCAGGGCGGCCTTCAGTCGGTCA  
TTCCCATGTCTCGGTGCCAGTCCGGATATGCCCCGAGTGTCCCACAGCGTGAAGAG

CAGCATGGAGACCCCCTTGGCTATTCAACCACCGGCATGGGGTCGCGCATCACCAC  
GCTCTCCACCAGCGCTGGGCCTCTGAAAGGGACCTTAGCTTCGCTGTCCCGACCGCA  
AGGACAGGCCTCCTTCTCGACGCTGACGCTTTGTTGCGGCCCTTCGCTGTGCGCCGC  
TTGCGCGGTGCTCGCTCTCGGGTGCGGTAGGGCCGGACGCTTCGCCTGTGCGTTCCC  
ACGAGGCGCACAAACGCGCTGGTGGAGAAGAACCGATGAA

>CONTIG\_291\_length\_1332\_cov\_16.568465

AGAAGCGGCCACCCACGTGGTTCGGTGGTAATGCGGGAGCTGCCGCCCTTGTCGAAG  
ATGTAGACCTGCGCGGCTTCATAGCGACGGAAGTGTGTCTCGGCCAAGTTGAGTAGC  
ACCGACTTGCCGGCGCCGGTTCGGGCCGATGACCATCGCGTGCCCTACGTCGCCACA  
TACGTACTGAAGCGGAACGGCGTCGTCTCCCCGGTGACCACGAACATGTGCGGCGG  
GGCGTGGTCCAGATTCTGGTTGCCGGGGAATAGATCGTTCTGGCAATAGCGCGGCCC  
GGCCCACACGCTGGAACCTGGCATGGCGTGGGCGAGGTTGAGGGTGGACACCATCG  
GCCGGCGGATGTTGTGCTGTGCGTTGCCTGGCACCGCGCCGAGAAACGCATCGATC  
GCGTTGCCGTCGCGGGCTTCGTCAATGGTCACAAAGCCTAGACCATTGATTTGCGGT  
TCGACCGCGCGCAGCTTGGCTTCCAACCTTCGCGGATCCGTATCAAGCACGATCAGC  
GATTGGGTGAAGTAACCATAGCCCACCGCCTCTGCTGCGATTTCTTGCATTGCAGCG  
TTGGCGTCTGCCGCGTTAGCGAGCGCTTCCGGGTTTTCCAGTGCTGACTCCGACTTGC  
TCACTAGCTCCTTGAGAATGACCATGAAGGACTTGCGGCCGCTAAACCACTGGCGCT  
GGATCTTCTTCATTTCTTATCGGCTGTGGCCTTGTTCCAAGGCCACCCAGCGCGTCAC  
CCACCGGTAGGCCATGCCCATCCGGTTCAAGCGATCCAGAATGCCGGGGATGGTCT  
GCGTCGGGAACGTGACGCACGGTGATGATGCCCAAGTGGTGTGTTGCCAGCTTCGGTT  
CTTTGCCCCCGATCAGCGGGGTGTCGGGCAGCACGCGGCAAAGCTCTTGGGATACG  
TCACCAGGTACAACCGGGTGACGTTTGGTGCTGATTGTGTGCTGCAGGTAGGTCAGC  
AGCTCGGAGTCATCGAGCGCATGCACCTCGGGCAGGATGGCCGAGAAGGCTTCCAG  
GAGCCGAACGCGCTCCACCACGAACCTTGTCGAGCCAATCGTTGATTGTCTGCCGGTT  
GCGGTTGGCCGCACTCTTGCGCTGCCCGTCCGGGTCCGTGAAGAACCAAGCGCGGG  
CTGTACTCTCCTGTGCCTTGGGTGGCAACCATCCGAGTGTGAAGTAATACGTAGTCT  
CAAAGTGCACGCCCCTCTCGGCGATGCTGCGGCGCTCTTCATCGATCAGATAGGACA  
TCGGATCGGGGAAGTGTTTCGCCGCTGGGGTAGCTGGTGCTGGGGGCGCGTTGTGCGT  
CGATCTGGAAATACCAGCCGTCGCCAA

>CONTIG\_292\_length\_1304\_cov\_11.755310

CATCGGTGACCACGCAGAGCAGAATCAAAGCAGCATCGGAGAGATGGCCGAGCGG  
TTGAAGGCACCGGTCTTGAAAACCGGCGAAGGGTCAAACCTTCCGTGGGTTCGAAT  
CCCACTCTCTCCGCCAAGTTGGATCTAAGTTGTTGATTTTTTAACAATTATTTCTAGCT  
TGATGAAGGTCTTCGGCAGGACACAAATCGGGACACATCTCCCCGATGCGTATCCCT  
CATCACCTCACTCGCTCTCCAACGGGTCACTGGGCTTTTCGTCAGCGCGTGCCTGTC  
GATCTGCAGCGTGTGCTCGACCAAAGGTCATCAAACGAACCCTCCACACCAGCGA  
GCTTGCCAGTGCGCGTCTGCGCGCATTGCTGCTTGCCGCAGGCTATGCTCAGGCCTT

CGACGTGTTGAGGGATCGACGTGTGGATAAGCTGGGCAAGAAAGACATGGAAGCCT  
TGGTCGAGCGCCTAGGCCATGGAGCTTCGCTTCGTGAGCTCACCTTGCATCGCACGC  
AAGCACCGGATGGCACGATCAGTGAGCGCTGGCAGATCGACAACGACGAAGATCTT  
CGGCTCTTCCGCAAGAGTCAGACATGGGCCAATGCGGCAGAAGTCGCCGCCATCGG  
CGCTCTTGACCCTGGTCTTACAGTTCAACCGAAAGCTTCTCTGCCGCAGGTGGCCGA  
GGTCATTGTTTTGTCGAAGGCGCGCGAGGCTTGGTTGGCAACCATCAAGAGTCGCAC  
CCTCCCCAAGACCTATACGATCAAGATGGCGGCTGTTGATTCGCTGGTCGCTTTTTTG  
GGGGCAAAGACCAAGCTCCACACGATCACGCGACCTGATTTGGCTCGCTGGTATCA  
GCACATGCGGGAGAAGGGTGCTTCGACACCAACACTCACAAACAAGCAAAGCTATG  
TGGGCGGGAAGGGCGGCTTCTTTGATTGGGCGATTGCCTCTGGCTACTACCCCAAAG  
GCGACAACCCCGCATCCGGACATGTGAGCTACTCCGTGCGAGAGAAGCGTGCCAGG  
CGCAAGCTTGGGTTCAAAGCCTATGACCGTGAGCAAATCAAACGATCTTCTCGCCA  
GTCAACTTCGAACGACTCTCGGCAAATGCCCGATGGGCAGCATTGATTGGTCTCTAT  
ACAGGCGCGCGAGCATCAGAAGTCGGGCAGCTGTTGGTGGCTGATGTGTTCAAAGA  
GGGCAAGATTCCGTGCATCCGGATTTTCGGATGAAGGTGAACACCAGAAGGTCAAGA  
CAGAAGTGAGTTTGCGCACGGTGCCGCTGCATCCGGATCTTTTGGCCCTAGGTTTTA  
TGG

>CONTIG\_293\_length\_1301\_cov\_9.727428

CGTGTCGCCGGGACTGTCGGTGTTGGCTTACGGAATAAGCACCGAAGCCTTGATGCC  
CCTTCTCTTTAGCAGAGGGCCTTCAAAATAAAAGAGGGCGCCCTTTCGGGCGCCCTC  
TTAGGTAGGTGCGCGAGTGTGCGCCACAGTTGCCTGCGCTGCCACATGATCCCGGC  
GTTTCGTGTTTCGATATTGTCATACTCATCGCCCATGTCAACCCAAAGTGACTCAAC  
AGGTCCTCGCTCCGCTACTATCAGACACACAGGAGGGAACCCATGGACGAAGAAGA  
ACAGCTAGCGGCAATGGCGGCGTTACTTTCAGCTGAACGACTAGCTACGTTTATTCA  
GTTATCAGGCAGCGAAAGAGATGCGCTCGATTACATGATGTGACAGTGGTAGTCG  
CCTCAGCATTGATGCCTGTGCGGTGTTTAGTCGAGATTGCACTCCGAAATGCGGTAA  
GTGAACGTCTGAGGACGGTGTTTCGCTCGCCTGACTGGCTTACCCAGCCACCAGCAC  
CGTTTTCTTGGCGATCTTCAGAGGGAGAAAAGATTAAAGAGGCGAAGAGGCAAGCG  
CAACGCGCTGCCTACGCCAAGCTCACTGATAGCGGAAGGCGGGCATTGGATGCAGT  
GGCATTGTGTCGGCGGCGTTCCGAGTGGCATCAAATACGAAAACCGCATAAGAAAAC  
GCCAAGCAACACTTTCCATTTCCACGCGCAACTGCTTGCGCAGCTGACAATGTTCT  
TCTGGAAGCGGATTTTTTCCAGCGACTACGAAAACACTTTGTGGAAGCGCGGACTAA  
AAACACTGTTTCCCAACAAATCGATAAATAGGGGAGAGGTGGCATCTCACCTTGAA  
ATCATCTACCAAGCCCGAAACCGCATCGCTCATCATGAGCCAATCTACGGCGAGCG  
CCTTGCGCGCCTCGTTGAATCATTGGATTTTCATCGTTACGAACTTAGGGAACAAGGA  
CGGAGATGAGAGCAGCTCGCTCGCCAAATTGACTGCTCGCCATAGAGATAGGCTGA  
GGCAGACAGCAAAGGAGAGTGACGACCTTTTCGCAAGATTCATCGTGCCATCGGGC  
TGATCGCGACTCAACGATCGAGGATTGAATAACAGCAAGGAACACCCTTATGAGCA  
CTATAGGCCACGACTCACGCGTCGCTGTGTTGGTCGATTGCGATAACGTGCCGACCG

ACATCGTCGAGCACGCGTTGCTCATGGTGGCCCAGTTCGGCCGGGTCTGTGCTGCGCC  
GTGGGTATGGCAACCACAACACCCTCGCCAACAAGTGGCAGGAAGTCCTGGTCCGC  
C

>CONTIG\_294\_length\_1297\_cov\_362.878632

GCATGCGTGATCGGTGCGACTGTCGTAAAGCTCGACGCCCTCACGATTGAAGATGC  
GGATCGGCACGTTGCTGTTTCGCATGGATGGTATCCAACTGACAGGGAGCTTTCCGT  
AAATCGCATCACGTGCGCCCTCGGGCACATGGCGACCGTATCCTTGCTGTCGGTAT  
TTGCAGTGAAACGGCTATCGACACCATGCTCACTCTCCAACCTTTGGAGAAGCAACAG  
CACGCACCTCGACCTCATAGCCCTTCTCTTGCAAGCCTTTGATCAATGTCTCCGATGC  
CCACTTTCCATCGCTTAATGTGGTGTGCGAAAATGAGGTTCTTTTTTTCGGCAGTCGCT  
GCTACGCGCAGCTCATCGGCCCAAGAGCTGGCATCCCTATGCGTCCGTCCAGACCAC  
TCATAAGGATTATTTCTTTGGAATTCATCTGTGCGAGGATGATACAAACGGAGCTCG  
TCTGGATCGATCGTCACCGCATCTCCATTTAGCTCATTCAACGCACCCCAAACCTAGT  
CCGCCCTTACCAGCACCGGGCTGCCCAGCCAAAATTATCGCTTTGGGTTGATCATGA  
GTAATCGCGCTTGTGAAAGTTTTACTTGTTAGTATTTGTTCTCGCAGCACTTTTTTCAT  
GAATATCCTTTGGCAACTCATCCGTAGAGTCAGCCATGGTTATTGCCTGCCTTCGGA  
TATCCAAAATAGTCCATTAGACTTCGATCCCTCCAAGCACCGGGGAGCGACTATGC  
AGCATCAGGAGAGTTTTCTCTTTCGCCTTTGCGATTGCATCTGCATCCCCACTCGCCT  
CAGCGACCCTTTCTTGCTCACGAGCCTCGTCTATAAACATTTCCAAACAATCTTCTAG  
TGCCCAGATCGCAAACCTCAAATGGCGGAGTGATTGGCGATGGCTTATCGACCGACTC  
TTGGAGCGCACTTTCCAACCGCGCGATGTGATCGGGGTAATCCTTGAAGCTTTCGCG  
CAAGCCTTGTGGCACTGGCGGTCGTTTGCCGACCGAATCAGGGGAAGAATCGTTGGT  
CTGAGTCATAAAAGCATCCTGATTGAGGCGTTGCATTGGACGTGGAAGATTGGGCTT  
GCGCTTAGGCGTTGCTACGGACGCACCCGGTTGCAATGGCCCTAACTGCTGCACGGT  
GCGCGCATTGATTAATGCCAGGTCGCGCAGCAGCTGTTGACTGTGGCTGCCATCAGC  
CTTCAATCGACTTTGAGGCTTATTGGAAGGTGTGCTATCACTCATGCAAGCGCCATC  
TGTAAGGCTTCGATCTTCACCTTCGGCAACAAGCGCTT

>CONTIG\_295\_length\_1296\_cov\_0.308811

AGAGAAAGGAGAGGAGAAAAAGGAGAAAGGGAGGAGAGAGAGAAAGGAGGGAGG  
GAAAGGAAAGAGGGAAGAAAGAAAAAGGGAAAGGGAAGAGGGGAGAGGGAGAGG  
AGAGGAAAGGGAGAGGGAAGAAAGGGGGAGGAGGAGAGGAAAGAGAGGGAGGAAA  
AAGGGGGGAGAGGGGGGAGAAAGGGGAGAGAAAAAGAGAGAGAGGAGGAGGAGG  
GGAGGGGGGGGAGAAAGAGGGGAGAAAGAAAAAGAGGGAAGGGAAGGAGAAAAGGGA  
GGAGGGAGGGAAGGAAGAGAGGGGGGAGAAAGAAAAAGAAAAAGAAAGAGAAGGGAA  
AGGGGGGAGGAAGGGAGGGGGGAGAAGAAAAAAAGGGGAAAAAGAGGGAGAGAG  
GAAGGGAGAAAAAGAGAGAGAGAAGAAGGGAAAAAGAGAAAAAGAAAAAG  
GAAGGGAAGGAAAGAAAAAAAGGAAGGAGGAGAGAAGGAAAAAGAGGAGGAGAAGA  
GAGAAAAAGGGAAGGAGGGAGGAAGAGGAGGGGGGAGAAGAGGGAAGGGGGGA

GAGGAAAGAGGGAGAGAAGGGGAAAAAAAAAAGAGGAGGGAGAGAAAGAGGGGGA  
GGGGAGGGGGGAGAGGAAGAAAAAGGAAGGAGAAGAGAAAAAAAGGGGAGAGGA  
GGAAAGGGAGAAGGGAAGGGGAAAAGAAAGAGAGAGAAGAAGGGGAAAAAGGGG  
AGAGGGAAGGAAGGAGAGGAAGAGGAAGGGAGGGGGAGGGGGAAAGGAAGGGAGG  
AGATAGAGGAGGAGGTGTGATGAAAGTGTGAGATGAGTTAAAGGTGGAGGGATTG  
ATGGGAGAGGGAATGGAGATGGGGATAAGAGTGGGGAGGAGGGAAGGAAGGGGG  
GGGGAGAGGGAAAGAGGAGGGGAGGGGAAAAAGAAGAAAAAAGAGGGGAGGAAAG  
AGGGAAAAAGGGGGAGAAGGAGAAAAAAGAAGAGAGGGAGGAGGAAGGAAGAGA  
AAAGAAGCGGCGCCGGGCGCGCCGCGCGCGGAAGCGCGTCCGCGCGCGTGCGC  
GTGCTCGATGTGCGCAAACGCCCCGCTCAAGGACGGGCTGTCGCCAGAGGTGCTGGC  
CGGCATCGGCGCCACCCTGGCGCGTGCGGAGCAGGTGCTGGTGTTCAGAACC GCC  
GTGGCTATGCGCCGGTGCTGCTGTGCCACGACTGCGGCTGGACCGCCGCTGCCAGC  
GCTGCAGCACGCCACTGCATCAGACCCCGATGACCGTGCACGCCGGTGGGCGCCGT  
CTGCAATGCCACCACTGCGGCGCGCGCCAATCCGCACCGCTGG

>CONTIG\_296\_length\_1294\_cov\_62.304199

GACTCGTCATCAACGACGCTAAGGCGCTGGTGCATATCGTGGCGGATGCCGTCTATC  
TGGTAAGCCCAGGTGTGTTTCAGCGCTATGCGCAAGAACATCCTCAAATCGCTGACT  
ATGCCAAGCGTGAGGAGATGGCAGATTGGCAGTGGGCGCAAAAGAGATTTGAGAA  
ATTGCATCTACACCGTAAGCAAGCCAATGGCCTGAACATCTGGACGTGCGAAGTAA  
CCGGACCTCGCAAATCGCGCCGGCTTCACGGCTACCTGCTTGAGCGTTGGCAGGGTG  
TATTTGGCGAGCTTCCGCCAAACAACCCTTACCTAAAACCTTCGGGAAGTTGCCTCAG  
AAGCCACGATAGAAGCGGATGATCATCCGCGCGCAACGCATAACTGAGTCAGATAA  
GGGCAGGCCTCAAAAATATTTGAAATTTGATCGGTGCATGCCCAAAAATAAGATAC  
ATGTAATTAATACCTCTGAAAGATTGGCTCGGAGCACGCAGTGTAATAAATCGACA  
TTCCCCGTTGTTCTCTGATGAGCAAATGTCTCTGACCTCGCGCTGAATATCCTCAGCT  
GAAGCTCCCGTTCTGAAATGCAAGCTTCTGCTGAAGAACGTCCATCTTTATAAGGC  
TCTGCAACTGCAGCACACTGGTTTTTCATATGCCGCCCAATCTTTACAGTTCTTTCTC  
CCGCTTGATGCACCCAGCTATCGCATCTCGCTGAGCTTCGCGCTTAGAAAGTTTCC  
CTACTGAAACGCCTAAAGCTCCACATCAGATTTATCAAGCGACACAGCCCCCAA  
GTTTTGATCCATTTTCCTAGCGGCCGAGGTGCTGGTGCAGTCTCTTGAGAGCTTCCTT  
GGGGAATAGGCGCACATGCGATAGCTCCCTGCCACCAATTTGATACTGCCCTGGCG  
GACAGCCTTGAGCCCAAGCAATTACAGGAAGATATAAAATTGGAAAAGCCAAAAGA  
ACACAAAGCCTCATAGATGCATTACCCAAATATAAATTAATTCATCTGAAGTACATC  
GGTTTCATTAACACACAAACGTCAGTCTCGTCCATATCTGCAGTAACGCTACTGATA  
AAGTGATGGTGGTTACCCAATCTGATGAGCTTGAAGCCGAAAACGGCGAACACGCG  
GCTACCCTGTTTCATTACGACTGACGTGATAGCGCTCTATTAAATGATCTTTACAGCG  
CCCGCATCGGCGACTGCTGAGCGATGTCCGGCTGGGACCGCTGAGCATCCAAGGCC  
TGTGACTGGCGGATGCTTTCCTGCAGTGGAGGCACGGTCTCGGAC

>CONTIG\_297\_length\_1289\_cov\_330.334768

CTGGTGACCGTAAGCGTCGATAGGAAGCCTAGGCCTTTTTTGAAACGAGTTCCAAGC  
GGCGTTCAGTTCGCTCGATGAGAGACCGCTGACGCTCGATATATGCTGCGCCCTTCC  
GAAGACGCACGATCATGCCAAGGGGATAGATCACACATCCGTAGATCGATAGGCCA  
AGCAGTCCCAGGCCTGGCGCAATCCACTTGGCTCCGTTTCGTCATGAAGGCCAATGGG  
GCAAGCATGATAGCAATGCCCAATATCCCCAAACAGCACAGCACTTGGACCAGCAG  
GAACTGCATGGCGTGGAATTTGTCCTGTCCAAGGCGCTCAATCTTCCGCAGCTCAGC  
TCGATTGATGGCGAGGCCAACCCGGTCGTTCCAGAAAATCGCTGTGCCGTAAGCCC  
AACGCGCCAAATTGATCACCATTGAAGCCACAATGCCGCCGATTACAGCTTGCGCC  
AACCAATTGGTCATAAGTCACCTCAGTAGCCAGAAAAATAGATGGAACGGCTCACT  
GCCCCGTCTTTTTTTAACCGATGAGCTACAAGCCCTTCCGATGCATTAGCAAAAAGG  
GTGCCGGTGAACACCGACACCCTAAGGTCAAGCATCAGCTGGTATGACACGCATTT  
GCGCAGTAGTAGCAACCGTTGATCCGATTTTTCGGGCCAGCGAGCCTTTGCGTTTGTT  
ACAGCCTGTTGGCAAGTAGCGTGAGAACCAAGACTGACTTGATTGACCGGCTGCGG  
CATGTAGGAGCACCCGGTCGTGGTGTGTGTCACCTCATGATCGCCATTGGTCTGGGC  
ATTTTTATTGATGATGAAGTTAGGCAAAGCGCTTCTCCTTAGAGGGACAAATGATCG  
AATTGGTGGTGTCTGCGCACCACTTCGACCCTTCACTTTTCCTTGCGAACGCCCTTG  
AAAGGCGCTTTGTCTGATTTGACATCCATAAAGCGCCCAGTTTCGGTATCGCGCTTA  
ACGAAATTGCCTGCAGGAGTTTGTGTTTTCGAGCGGTTACGCACCGCGCCATTGCGG  
TGACCGTCGCCTTTCGGTGGATTAGTAGCCATTGAGGTTCTCGGTAGTTAAGGAAGA  
AAGCAGCAAGAGGTGCGCCCGATCTTGACCGTTAAAGGCGGGGCAGCGTCTGCTGCC  
CCGCACCTCCCCTGACTAAACGTCAGGGACCCAGATCGGCCAAGCTTTCAAGCCTGC  
AGCAGAAGCGTGAGCTTCTTGCCATTCTTCAAAGTAATGACTGCTCTGAAGATGAG  
CTTGTAGCCAGGACGAGGGGTAGCGGTCGTTGTTGACACGGC

>CONTIG\_298\_length\_1282\_cov\_11.421645

GATGTGGTCAAGCCGAAAAAGGCTGCTTCCACAAGAAAGGAAGTAGCGCCCAAGTA  
TTGGTTGCCACACAATCAGGAGACATGGTCAGGGCGCGGTCGTCCGCCTAAGGCCTT  
CACCATTTGGCAGGGGAGCGCGTCTTACAAAGAGTGGAAGGCCAAGCATCCCGACG  
AAAAGTTCCCTAAGTATCCTGGGTGAATTTGAAGAGGCCTCGCACGGCGAGGCCTTT  
CTCCAAGTGCGGAGCTTTGGGGAATATCGGGAAGAGTTCTCTGACACTAACTAACT  
CATAGCATTCCCCAGAAGGTGCTATTCAACTTTGCAATCGTCTACCGTGACTTTGCCT  
CAGCACGCAAACCAACCACGTCTTTTACTCGACCTAGCTCTGGCGGCACAGAATGTC  
CCTTCGGCACGGTGGCGCGATGCATTTAAGTAAATGTAGGGGCTAGAAAACCAACC  
CGTCGGAAAATCTCCAGTTCAGGTCTTATAATTGCCACATTTTCATGTAAAGGCTCG  
AGAAAATCTAGCGCGATCAACTCGCCCGAAAATTGGTATTCATATGTGGATTTGTCA  
TCCTTAAGATCATAAATCTCTGTGTTAGCTGCAATGGGATGGCAAAGATTGTCCAAG  
CTGCCACTTAGACTCACAAAAGCATTGGTTAGTGCCTCGCGGACATCATCAGGGAGG  
TGAAATTGATCAGGGAACTGCCTGATGTAGAATCTCTTCAAACATATATGGATATC  
ATGAAGCGGGAATAGGTGATTGGGTGTGCTTTCGGGAAGTAGTCGAGTGTTAATGC  
GTCATGATAGAGGTGCGCTATATATATTCTAGAACGTATCCAGCTCTAATTGATCG

TTCGGCGGTGTCGCGCTCAGATTGAGGGAGGTCATTTTGAATTCTTACTTGTTTCGATC  
ATGGGTTCAAATACTTTTATGACCGACGAGGTCGCAGTAGTGTGCGCATCCATTTCA  
AGTGTTTTTAGAGTTAGCGCTTTCTCTTCAATCGTATTTGAGTGGTGAATAAATCCTA  
CGGATTTTATGAAATCCAGGTGTCCGTTGGAAACATGTGCAAGTTCGTGACCCACGA  
TGAAGCATAAAGCTGCCTGATAGATGTATTTTGGCTGTGATGGCAGTAATAGATATT  
TGGGGTCTTTGGTGTGAAATACAATTTCTTTGGCAATATCCATCAAGAATTTGCCTG  
AAAAGTCTCTCTGATACGCCAGGGTTCGCTAGACACTCAAGACCCTCGTTGCGCGT  
AGCGCCGTTCAAACCTCTACAGGGGACAAG

>CONTIG\_299\_length\_1270\_cov\_17.069991

GCGATCGGGCGCAGCTGAAATTGCCCCGGCCTGCCGCGCACCCGCAAGACCGCCCCG  
ACCGCTGGTGCCGGCGCATGACCGCCACCACACCAAGAAGGATGCACACGCTATGA  
CGCAGGACCCCTACGGAATCACCTTCAACGATGGGCCTAGGCTGCTATTCGTCTATG  
CGCAACTGTTCAAGCCGCATACCAACCCCGTCCTCCCTGCCCAGGGCGGGGCTTGCC  
TGTGGCTCCGGGTAGATAACCATCACGCAGATCATGTCGCCGATCATGGAGCGCGCCT  
ATAGCGACAAACCGACAACCTACGCGGTCGTCGTTGTCGCTGATGGTGTGAGTATC  
ACGTCGCCCAGACACCCCTCATCGAGAGCGATGCTCAGAAAGCCCAAGGGCACCTC  
ATTGATCGGGTGGCAAACACCCTTTTTGCCTTCGGGCCACGCCGCTAACCCGTTCTGA  
CGGAGCAACCACATGGCAGTTAGAGCAAATGCATTTCGTGCTTCAGCGGGACATTGA  
TGTCCTCGCAGGGGTCGATCTACTGCATTGAAGAGCAATGGTTCTTGCGCGCGTTAGT  
GCACGAAGACCACGGCGGCGACAGTTTGGAGGTCGGAATCAGGCTAAACAATGCCG  
AGCTATACGTCGTGCATCGTCCAACAAACGCAATCTCCCTCGCCCCCGGTCTTGCGC  
TGCAAGCACGGGTCATTGGCGAAGTGAGTGGCCCCGGCGTGCCGCCGAAGACCTCA  
CTTGTGTGGACAGCCGATGGCGGCCACGCAATTTCAATGGGCAACTATTTTCGTCAAC  
ATTGATGGCAACGAACGAAGGAAGTCAGCAAAGCGGCGGCCTACTTTGCAACGCA  
TTGGGGCGTCTGGGTGATCGATGCTGACGGCAAGGAAGTCGGTTCCGATCCGTTGGT  
GGTGATCAAACCCGCAGTCGATTGAGAACAGCCGCCCCGCCGATTGCAGACCTACC  
GTTGCAAGGCCGCAATCGGCGCGGGTAACCTCTTCATTGAACTCGCTGTGGCGTGCAA  
CAACCGCCGCCCAGCATCGCCGTAACATCAATATCGATGTCCTCGCGTGGCGTCG  
AGACGTAGGCGCGACCACCGCAGTCGGTGCAAAACACGTCCCCGCCTTTGCAGCTG  
GGGCAGCGTGCAAATTGCCAGAACGAGCGGTGCATGAACACGCCAGCGAAACAGA  
AGTAGCAGACGATCCCCGCTTGATCCATCGTTCCGCACGGGCCGCCGCACGCGTCAC  
ACACGCCAGGTGGGCCGAATAGCCACG

>CONTIG\_300\_length\_1258\_cov\_17.657825

CCCGAGCAACAATTATGACGGGACCATCGACGGGAGGCACGCGTTAACTGGCAGAT  
GCAGTTCTACCAAAGCAAAGGCCATGGCCTAGATCTGTATAGCACCGCCCCTGACCC  
CATCCAGACGCGCGAAGTAGAATCTGGGTACGAAAAAAGAGCCCCGCATGCGGGG  
CTCCTGTGTCGCTGGCGTTGAAGCCTCAGTCTCGGCGCCGAGTGCCAATGGCGGGCG  
GCGTTGTTCCGATCACTTGGCGGGAACCTTCTGCGACGATCGTAGCTTTCAGCCAAA

TGCCTAGGCGCACCATCAGTCTGCTGCGCGGTCAACGGTCAGAAATATCTGAGCCAT  
CATAGACTTGGCTTCGGTGGCCGGAAC TTCAACTCCCAATGCCCTGCCCCACCCTCG  
GCCTGCGGTGGAAGTGCATCCTCTCCAGATGCCTCAGGCGTCAGCACCTCAATCGGC  
TGCGGAGAGAAAGTTCTTCTCCAAGGCCTCAGCCGTCTCCACCATCGCTTTTCGAGCC  
CGCTTGATCCGCCCCTGCTGGATCGCTTGGATGCGCGGGGAGACATGCCTCTTCGTT  
CGCGCCAAGCGCCGCTGTGCTCTGGCCACCACTTTTGTATCGGGATCGTATTCTTGCT  
CATAGAGCTTGGCTTGCGCATCCAGCACGGCCATGCGCGCCTTG TAGGGTCGCACCA  
GCGTATGGGCATACTTGCTGATTGAGCGAGCAAGCATCTCGGTGTCTTCAAAGAGAA  
ATGGCTTGGTGGCGTAGCTATCGACTCGCCGACAAACCAATGTCGAGTGCGCCCGCT  
GGA ACTCGGGTTCAATCTGGATAACCGGGATCTGCCGCAATACTTCGAGAGACTGCT  
GAGCCACCTCTCGCTGGGCTTCGAGCCAATCTTCGATCAGCTGCGCCTCTTG GTTCA  
GGACCTCCGAGTCTGGCCGACCCGAGGACCGAGCCAGACGCGTCACGCGACTAAGA  
TGCCGGGTCTGACCGCTGTAAGGCGTGTAGAGACCCGGGCGAGGCGCTGGCGCACG  
CGCCAAGCGCTCTTTGATCTGCCGCACCCGCTCTGCGCCTGACAATCGTGTCTGCTC  
AACCGCTGTGCGCCCGTCCAATCCAGAAGCCTGTGCGTTGGCCCGATCCCTAAGTGC  
TGCCGCATGGCTATGAGACGGTGGCACCTCGTGCACGAGACCACCGCTTTTTTTCAT  
GTGCTCAGCGACAAGCTTTGAAAGCGCCAGTGCTGCTTCTCGCCCACCTGCCCCTCT  
CACTTCT

>CONTIG\_301\_length\_1258\_cov\_4.835544

GCATGGCATTTCATGTCATCGTTTTTCGACCACGAGTACCCGAACTCCACGCAACACCG  
ACATTGCCCACTCCTCCACGTAAGTCGGCCAGTATATCGACACCGGTTTCGCCACGG  
GTTGCAGACCCCGCTTGCAGCTGAATTCGTCAGGCACGTGCTGACACTGTTTCGTTTC  
GCTCGCGACTCGCTATACTGCGCGGCCACGCCGAAGTGGCGGAATCGGTAGACGCA  
GCGGATTCAAAATCCGCCGCCCTTAAAAGCGTGTGGGTTCGAGTCCCACCTTCGGCA  
CCAATGCATAGTTTCAGGAAGTGCGATTACGTCCAGAACTTCAATTAAACCCGCAA  
CTTAGCGGGTTTTTTTGTGCCCGACCGTCCGGTGTGCTCCATTGCGGTGCATTGCAAT  
CCGGGGGCGAGTTGGGGGGCAAATATGGGGGGCAACGGCGCCGCAACGCCTTTTTTCCCC  
CCACCAAGTTGCCCCCAATGCCCTGACTGATACCGCGATCCGCAAGGCAAAGCCC  
GCCAGTCGCACCCAGCGCCTGTTTCGATGGCGGGGGTATGTACCTGGAAATCCCCCG  
GCCGGGGGGGAAGTGGTGGCGCCTGAAATACCGCATTGACGGCAAGGAAAAGCGGA  
TGTCCTTGGCACCTACCCCGATACTGGGCTGGCGGCGGCCCGGGCAAGGCGTGAT  
GAAGCCCGCAAGTTGCTGGCTGCTGGCCTTGACCCAAGTGAACAACGCAAGCAAGC  
GAAGCAGGCACAGGCTGCTACGGTGGCCGCTGCTGGGGTGACATTCGAGGCCGTCG  
CCCGCGAGTGGATGAGCCGCCAGACCGTGGCGCGCGTCACGGCCGAGAAAAACCGC  
TGGCTGCTGGAAACGTTCTGTTTCCCGAGATCGGCAGCCGCCCATCGTCGAGATC  
AAGCCCCGTGAGCTGCTAGACGCCTTGCGCAAGATCGAGGCCACCGGCAAGCTGGA  
AACGGCCAGCCGAGCCAAGATCAAGGCCGGCCAGGTGTTTCGTCACGCCATGCTTG  
AGGGCAAGGCGGAGATTGATCCACCGCCAGCCTGCGCGGCGCGCTCAAAGCCGCC  
AAGGCCCGCCACCATTCCGCCGTGACCGAGCCGGCCAAGATCTGTCTCTTTATACAC

ATCTCCGAGCCCACGAGACAGGCAGAAATCTCGTATGCCGTCTTCTGCTTGAAAAAA  
AAAACCATGCCTTAAGCGTCAAGCAGCATCAACCGCATTACCCCCGCGCATTGCTCC  
ACTGGTTTACCGAAA

>CONTIG\_302\_length\_1245\_cov\_20.564401

CGTCCTCGCTGTCCGGGTCCGTGCCAAATACGGATTTCCAGCCTTGGCCGGTGGGAA  
CGCGGCCAGTGGCAGTAAACGGCACGCCGCCGACTTCCAGCGTCATGCCGGTTCG  
TTGAACGTGTAGTCCGGCAGCAGCGCAGCAAGGTAGTGCTGCGCGATCAGCAGAAA  
GGCGGTTTGCTCGTCATCGCTGAGCGTGCGGCTGGCGAGCGGCACACCCGTGGGCA  
CGATGGCATGGTGTCTGCTTTGTCTCTTTCCATCTTGGCGCTGTTGAAGACAGTGGG  
CCGGATGGTGGGTTTGTGACGGTCAGTGCTGCCACGTGCCGCGCCAGTCCTGGCAC  
CTGGGCGAGCGTTTCCAGCACGCGGGGGATTCTGCTTCCTGCTCATTGGGTAAACAC  
CATGCACGGCGTGCGTGGGTAGCTGGTCAGCTCTTTGTCGTACAGGCTTTGCGCGAT  
GTTGAGCGTCTTTTTGGCGCTCCATCCAAATCGCCGCGAGGCCAGCTGCTGGAAGCG  
CGAAAGCGTCATCAGGGCGGGAGGCTTCTGCGACTTGCTTTCGTGGGCGACAGCGA  
GCGGTCCGCTGGCTCCGGTGGCGGCTGCAATGATAGCTTCGGCGTCGGCGCGGTCTG  
AAGATCCGGCCCTCATCTACGGGCGCATACGTCAACACCACACTGGCGCCGAGCGC  
TGTTTGCGCGGTGATTTCCAGGTCGTAATAGGTCGCCTCGCGGAACGCGGCGATGGC  
GGCATCACGGCGCACGACCAGGGCGAGGGTGGGGGACATCACGCGCCCCACATGGC  
GCGGCCCTTTCCCGCCAGCGGCACGGGATCGCAGGGTGTAGGCGCGGCTGAGATTC  
ATGCCCATGAGCCAGTCGGCGCGCGAGCGTGCTGGCTTGCCCAATACAGCGGCTC  
GCTGCTTTCTCCTGGCCGCAGATTGGCGATCGCTTTGGTGAGGCTTGCTGCATCGAG  
CGCGGAGTACCACAGCCGGCGCACCGGTCCGCGATAGGCGGCGTGGTCCAGTAGCT  
CACGTGCGATTGCTTCGCCCTCGGCTCCGCAGTCGGTGGCGATGATGATTTCCGGTCG  
CCTTGGGGATGTTGGCCAGCAGCACGGCCAGCTCACGCTCCTTTTCAGCAGTCGGCT  
TGTGCTTCCATGCGCTGGGGATCATGGGCAGCACGTCAAAATTCCATGCTTCCCACG  
CTTTGTCGTATCCCGGTGGGGGCCACTTGCTCCAGGAGGTGGCCACGTGCCCACGTGA

>CONTIG\_303\_length\_1242\_cov\_0.261883

TCTTTGATGATGCCCACGCAGTTCCGTCATCTTTCTCTCTTCTCTTTTTCTCTCCCCCT  
TCCCTCTTTCCCTCTCTTTCTCTCCCCCCTTTCTCCTTCCCTTTCTCTTCTTTCC  
TCTCTTCTCCTCTTCTCTCTTCTTTCCCTTTCTCCCTCTTCCCCTTCTTCTTCTTCTCC  
TTCTTCCCTCTTCTCCTCTTCTCCCCCTCCCTCCCTCTCCCCCTCCTCTCTTCCCTC  
TTCTCCTCCTCCCTTCCCTCCCCCCTTTCTCCTTCTCCTCCTTTTTTTTTCCCTTTCTC  
TTTTTTTTCCCTTTTTCTTTCTTTTTTTCCCTTCTTTCCCTTCCCTTTTCCCCCTCCTCCC  
CTCCCCCTCTTTTTCTTCCCTCTCTCTCCTCTCCCCCTCCTCCTCCCTTCCCTTTCCCCC  
TCTCTCTCCCCCCTCCCCCTCCCTCCCTCCTTCCCTTTTTTCTCCCTCCCCCTTCCCTC  
CTCCTTCTTTCCCCCTCCCCCCCCCTCTCCTCTTTTCCCTCTTCTTCTCTCCTCCT  
CTCTCCCTTCCCTTCCCCCTCTCTTTTCTTCTTTTTTTCTTTTTTCTTTTTTCTCCCCCTCCT  
CTCTCCCCCTCCCTCTCCCCCCTCCTCCCCCTCTCCTCCTCCTCTTCCCTCTTTCTTTCC

CCCCTTTTCTTTTCCCTCTTTCCCCCTTTTCCCCCTTCTCCCTCTCTCTCTTTCTCTCTCT  
TTCTCTTTCTTTTCTTCCTCCTCTTTCTTCTTTTTTCCCTTCCTTTCTTTCCCTCTTTTCT  
CCCTTTCTTCTTCTTTCTTTTCTTCCTTCTTCCTTTCTCCCCCTTCCCCCCTCCTCCTCTT  
CCTCCCCCTTCCCTCTCTTTCTTCTTTCTTCTTCCTCTCTTCTTTTCCCTTTCCCTTTCCCCC  
CTTTTTTTTTTACCGTGTTCACTGCCTCGATGGCTGCGTTGGGCCCGGTCACCACACGC  
ACGTGGCGCTCGTCCACGCGCTCGATCAGATAGCTGCGGCCGCTGGCTTCGGTGATC  
TCGCTCTGCATGCTGAGGTGTTGCAGACTCGCCGAGGCGTCGCGCTGGGTGTAGGTC  
TGCGTGTCCATCACCGCGCGTGCGCCGATCGGCAGGCTCTCCGGCTGCAGCGGATTG  
ACGCGGGTGGCAGCCTCTGCAGGCTGGTCGACACCGGGCAGCGTCAGTGAATAGCG  
CATGCGCTGCCCCGGCACTGACGCTGGCTTCGATGGTCAACTTGCCGTTGCC

>CONTIG\_304\_length\_1225\_cov\_27.809654

TGAAGATTGTTTGACCGCCGACGTTGCGCGTGCTGCTGCTCGTTGGCACCTGGCGCG  
CCTGGCCGACGTACTCGGCCACTTGGGCGCGCTGCTTGCTGTCGAAGTCCGACCGCG  
CTTTGGCGACACGCGGAGACAGCCTCTCTGGCTGCGCGGGTGGTGGCACATATGCC  
GGCGTTGACGTGGGTGCGCTGTCTGGCACCGGGTTCGCATTGGCAGTGGCTGTAGCG  
TTGTCATTGAGCGCGCTGGTGATGGCAGGCACTTGGAGTGCAGTCTGCGCGTTGGCA  
GCGCCGGCAGTCAGAAGTAACAGGGGGCAGGATGTGCGTCTTCATGGTTTGCATAGT  
GTTTGCACCTCGTAGGCGAAAAATTAGGGGGTGCTACCGATGTCGCGCTGCCAATTGA  
AGTCAGTGATGAACAAGCCAAGCGGGTTCACCAGCTCGACCTTGGGATCGGGCGTG  
CTTTGCTTGATGGTGAACGTGGAGGTCCACGTCGCTCGCTCTTTGACCTGGCCCTGGT  
CGGTGAAGCTCGTTTCCACCCACCGTACCTGGTAGCTGTGCGGCCGACACGGGCACCA  
CGGAGGTGACTTGCGTGGTGACGGTTTCTTGGCCGACCTTGCTCATGGTTCGAACCCG  
GCACGCGGGGCTTCGGCATTGAGCTTGTTTGCTGAGGCCGGGGTTCATGAAGCTGTAGG  
CCTCGCTCCATGCCGACTTCACAACCACCGGATCAAGCGGGACGGTGCGAACTAGC  
TCGACCCAATGTTTGAGGAAGTAGCGTATTTCCGCCGAGCCGGGCGTGTAAGTTGGGG  
CTTGCATAGCCACAACCTGCGGGGGCGCCATCGGTGTTGATGCGCGCGATAAGCGG  
CTTGGGCGGTGGCCGGTTGCTGAGGGCAATGAGTCCACCGGCCAGCACGACCGACA  
ACGCATAGCCGCCGAGTGCTTGCCAGCGCCATGCGCGCTTGTCGCTTTCCGCTTTCT  
CAAGTTTGTCTGTCCAGCCCTTGCGCGCTGAATCGTGGTGTGGGGACATCGGCGCCG  
AGCTGGGACGCTGGCCGACGGGCGTTTGCAGTAGGTCTTTGGTGCTGCTCATGCGTT  
GTTAGCTCTCGTCGTTTGTGGGGCAATCGTCGGGTTCCTACTACCGCCACTGCTGGT  
GGTTGTGGCTCCTTTCACAGCCGTGGTTGTTGCTTTGGCGACCGTTGCTGCGTCGCTG  
AATCGCTGCCTGCCCCGCTTCCAGCCGTTCG

>CONTIG\_305\_length\_1212\_cov\_5.682028

GCAAGAGCATCATGGCCAATGTCCGGCGCGATGCAGGTTTGTTGAACCTCAGCGAG  
GACATCGACATCGGACTGACCCCGCACGACCTCCGTCGGACCATGGGGCGCTACGC  
GGCGCATTTGTTTCGGGGAAAGCCGAATCGTCTCGCAGCTCTTGATCATCACACCCG  
CGGGCAGGGCCAGGACAGGATGGCCGCGGTGTCGGAGCGCTACACCGAGCAGGAG

TGGTCCAAGTTGCGAGAAGCGATGGGGCGAGTCGAGGAGGCGATAGTCGCCAAGAG  
TCCGCGGGTGTGGAACCGACTGAAGGGGACGGACAAGCCGAGGCTGGACGAGGCC  
AATGACCCTCCGGTTACTATCTTTGTTCAACGAAACCAGCGGACCGCATTGGATGAT  
TGAGGTTGTTTCGCAGTGAAGAGGACTACCGCACGCTGTTGGAGGCCGCGCTGGACC  
AGGAACTGGAGCGCGCAAGAGGTGGGCTGACGCAAGCTGTCAGCACCAAGGCTGC  
GGCACGGTTCCTGGGAGTCCACTTCGACACGCTGGGGGAGTGGCGCCGCGCTCCC  
CACCGTTGGGGCCGCCTTTCCAGAAAGGCGCCGGACACACGGGTGGCGGGGCCAAT  
CAGCACGTGCGTTACCTCTACGAAGACTTGTTGGAGTGGCAGAAAGCCAGGGCCAG  
CAAGACGCCAAAAGAGCGACGCCTTG TAGATGAGTTAGAACGGTTGAGGCAGCAGG  
CTCGGGAGTTGGAGCTTCAACTTGAACTACAGGCAGTCAGGGACCAAGTCGCCTGC  
ATGACGCGAAAAGCGGGCAGGGTCCTGGCCCTCACGACAGTCAAAGAGTGT TTGAC  
CGTCCAGCACGACTGGGTGTTGGTCGGCGGTGCTTGGTTGGCCATGTATTGACCGT  
GCCAGGCGATGTGCTGACGGCTGCGACTGCTGCGGATGGAGCAAACGAAGCGAACG  
GCACAAGCGAAGCGAATGTTGCTCATACCGGGGTTGGCTCAGAGGTTGGCGAGTTG  
TGGACGGCCACCCTGGAAGAAGTGCTGAAGGAGCCTTGGGTCGACAATGAGGCTCG  
AGACCCTTTCAGCGAGGCGATGGATACGGCACTGGGGGAGCTGACGCGACACCTGG  
CGCAGGAACGCTCGGCGCAGCGAAGCCGCGACCTTGAAGATAGGCTGCCTCCGGCG  
ATAGTGCTTCCCCGCACTCCGTTTTAGAGGTTTCGCC

>CONTIG\_306\_length\_1182\_cov\_22.366825

TATAGGCGCGCGGTTCTGGTGTAGGTGAATTGCAGCGAGGACATGTGCAGCGCGCCG  
CGGTGATCGCGGCGGAACAGCTGCCACGTACGACGGTGCCGTTGTCGTTGGGCGT  
GCGGCCCCAGCACAGTCCGCGTTTGCGCTTCGGCGCGCGGCGGGTGAGGTGCATGG  
CCATCAGTGC GCGTCCTGCGTAGCGACGAGTGCGCGCAGATCGGATTCAAGGTGCG  
CCACGTACCTGGCCCAGGCGTCGATCTGCGCTTG CAGCGCCTTCTGTGCACCGAGGT  
GGATCATCTCCCTCCCACGAATCAGCTTTGCCTGATAGGTCTGGCTTTCCATGACTGC  
CACGTCGACACGCACGCCGTTCACTCTGACTGCATAGCCCTGCTGCCCCGCATAGGCC  
TTTACCCGCGTCGTAGTTCTTTTCGCGCTTGAGCCAAGGCATCGCGTGCCTTCTCCAGC  
TTCTCGGCAGCGTTTCGCACTGCGGGTATGTCGATGGGATTGCTCATGCGGCATTCC  
TAAGAAGGTGAGTGCGCTGCACCGGGCCATGCCACAGCGCAGCGACGTTGTTGAGC  
CGGATCTGTTTCGGGATCACGGCGGATCGGTGCGAGCCTGGTCTGCGCCCCGCTTGATG  
TCGTTCCGGCAAAGCACACATACGTTGAGCACGCGCCCGTTCTGCGTCGGGAACTCG  
GCTTCATCCAGGCTGCGCGTGCAGCTCGTGCAGGTGCGCAACATCAGGCGGCCTGCT  
GGTAGCTTTCGGCCGCCGCACGCGCGAACACCTGCTGCATCGCGGTGAACATGGCC  
GGCAGTTCCGCCGCGTCGTACAGCTTCGAGGCGCGCTCGATGGTCACCGGCAGGAA  
GCCCAGTTGCGCCAGGCCATCGGCGGTGATCGTCAGCGGTGCGATCTTCGCGTTGAT  
GTCGCCGAGCTTGATGCGCACAACCTGGGCCGGTGCCGGCGCTGCCAGTGACTTGA  
CCGCTGAGAGAGAGCGGGGGAGAGGGCAGCAGGAGCCGCCGCCACCGGTGCCGG  
TGCCGACACGACGGCGGGGGCGGGCGCAGGCGCAGCGGCAGCGACACGTGCTGCCT

CGGCCTGTGCATCGGCGCGGCGCTGTTCTTCCTCGCGCTCCTGCTGCTCGCGCGCCA  
GCTTTGCCGCTTCCTCCTGACGAATCTTCTCGCGCTGCGCTTCCAGCCGCT

>CONTIG\_307\_length\_1152\_cov\_0.188293

TCCCTTCTCTCTCTCTCCTTTCTCTTCCCTTCTTTCCCTTTTCTCCTTTCTTTTCCTCC  
CTTTCCTTTCTTCCTCTCTCTTTTCTCCTCTCCTCTCTCCTTTCTTTCCCTTCTCCCCCTCCT  
CCCTTTTCCTTCCTCTCCCCCTCCCTCCCCCCCCTTCCCTTTCTTCCTCTCTTCCTCTCTCTT  
TTTCTCTTTTCCCTTTCTCTCTTCCCTCTTTTCCCTTCTCCTTTTCTCTTTCTTCTCCTTT  
TTCTTTTCCCCCTCTTCTCTCCCTTCCTTCCCTCCCCCCTTTCTCTTCTTCTTCCCTCTT  
CCCCTTTTTTTCCCTTTTCTCTTCCCTTCTCCTCCTCCTCTTCTTTTCCCTCCTTTCTCTTT  
CTCTCCTCCTCCTTCTCTTCCTTCCTCCTTCCCTCTTTCTTCTCCTTCCCTTTTCCCTTTTC  
CCCTCTTTTCTCTCTTCTCCTCTCCTCTTCTTCCCTCCTCTCTTCCCTCTTCTCTTCCCT  
CCTTCTCTCTTCTCTCCTCTCTTCCCTCTTTTTCCCTTCCCTTCCCTTTTTTCTCCCCCTTCCCT  
CTCCCCCCTCTTTCTCTTCCCTTCTCCCTTCTTCCCTCTCTCCTTTTTTCTTCCCTCCTTTTT  
CTTCTCTTCCCTTTTCCCTCTCCTCCCCCTTCTTCCCTCCCCCCTCCTTCCCCCTTCCCTTCC  
TCTCTTTCTCTCTTTTTTTTTTCTTCTTTTCCCTCTTTCTTTCCCTCCTCTTTCTCTTTTT  
TCTCTTCTTTTCTCTCCTCCTTCTTTTCTTCCCCCTCTTTCTTCTTTCTTTCTTCTTCTTT  
CTCTTTCTCTTCTTTTCTCATTCTTCTTTTTTCCCTCGCTCCTCCTTGCTTTTTTCCCTCCT  
CCCTTTTCCCTCCTTCCCTCTCTCCCTCTTTCCCTTCCCCCTCCTTCCCTCTCCCCCCTTCTCCC  
CCCTTCCCTCCCCCTCCTCCCTCTCCTCCCCCTTTCTTTCCCTTCCCTCCTTTCTTCCCCCTCT  
CCCTCCCCCCTCTTTCCCCCTCCCCCTCTTTTTTTTTTCCCTTTTCCCCCTTTCCTCCTCTCTCC  
TCCCTCTTCTTCCCTCCTCTTCCCCCTTCCCTCCCTCCCCCTCCTCTTTCCCTCCCTTCT  
CTTTTCCCTTTTCCCTCCTCCCCCTCCTCCTTTCCCTCTCTTCTACTTCTGTCTCTCTATTATT  
A

>CONTIG\_308\_length\_1140\_cov\_43.064166

ACCATGACACCGACAACCCGCACGTGCACATCATCGTGCGTGGGGTGGATGACAAG  
GGCGGCGACCTGGTGATTAGCCGCGACTACATCAGCAATGGCATGCGCGAGCGGGC  
ACGTGAGCTGGCAACGCGCGAGCTGGGATATCGGAGCGATATCGACATCTATCGCT  
CTGCGGCGAAGGAGGTCACGCAAGAGCGCTGGACGGGTCTGGATGCGTCCATGCTT  
CGGGAGCAGCAGAGCCGCGAAAGCGGCCTAATCCATGCCGGCAAGGTGCATGCAG  
ATCCGTTCCGCAATGCACAGCGGCAATTGCGGCTCCAGCGGCTGGCGATCCTGCGTG  
ACCACGGCTTAGCCACCGAACAGATGCCCCGGTCGCTGGAAGATCCACGCGAACGCG  
CCGGAGGCGATGCGTGCGATGGCGCAAGAGCGCAGGCTAGCAACAGAGCTCAAGC  
CGCACGTTGACGCCGAACGTAGCCGGCGTGGAATACTGGCCGACAAGGACAGTCTG  
AAAGCTGCACCCGTGCAGGGTGTCATCCTTGATCGCCGATTGGCAGACAAACTGTCA  
GGCACCGAGTACGTCAATTGTTGGCGGGTTCGACGGCCAGGTGCATTACGCGACGCTT  
AGCATGCACTCAGAGCGACACATGCCTGAGCGCGGACGCATCGGCGACACCGTGGA  
GCTGGGCACCTACACGCCGCCAGCCGCCACGTCTGCGGACAAGAACGTGCTAAGGC  
GCTTGAAGAGCGGCGTCTATCTCCCGGACGCGCATTTGGCCGAGGTGAAGGCGTGG

GACCCGAAGCGCTTGCCTGCGAATGCAACGCCGGAGTCCTACATCGATGCGCACGT  
CAATCGCATGGAAGCGCTGGCGAGCCGAGGACATGTCACCAAGCTGCCTGACGGCA  
CGTTCCGTGTGCCGCCAGACCTCTTGGCGCGTCTCGATGGTGATCCAGCCATTGCCC  
GTGACAAAACTCGTTTCGTGCGTCTGGACGTTAAGGCGCAAGGCTCGCTCAACCGC  
CAGAGCCAAGTCATCGGGCGCACGTTCCCTTGACGACCAGCTGGCCGCTGGTCGCCTT  
GAGCAGCTGAAGAACACCACTATCCGCACACGCACCCAGGTGCAGTTCCTAGACGC  
ACTGGAAGCGCGTGCCG

>CONTIG\_309\_length\_1126\_cov\_177.122122

CCGACCGGTACGGACAAGCTGACGATCGATGTGTGGAATGGTTCGGACTTCGTGCC  
GTTCTTCTCCGGGATGATCACTTGGTCGGCCGTCAACGCGGCTAGTATGCCGAACGT  
GTCGCTAGACATTGAGGCAAACGACGCCGGCGCGTTGATGGTGCAGACCTCGCCGC  
CCTACGCCCAAGAGGGCCCACTAAACCTGCGCGACATTCTCGAAGCGATCGCCGCC  
CCGGCGGGCTTCACTGTGAACTACTCCGAATCAATTCCCGAGCTGCGCTTGGTACGT  
ATTTCGGGCGACCGGCACGGTGCTGCAGCAGATCACCCAGATTCTCAACGCGGTACC  
AGAACTGTCGTGGTACGTCAGCCTGCAGTCGATCGTCGTCCGGCCGGTAAATGCGCC  
GCTGGGCGGGCGATCCTGTGCGCCATCAACAAGACGACCGGGATGATTAGTTATCCGGT  
GTACTCGACCAGTGGGCTGACCGTCGGTACGGTGTTCAACCCGCTCATTCGCCCCGG  
CGTGGCGCTGGACATTACGACCGCCTTTGACTTCGTCAACCGCACTAAGTGGATCGC  
AGCTGTGTTACAACACAATCTGCAACCAAACACACCGGGCGGCCAATGGCTGACGC  
AGATCGCCGCGCAGTCCTACGGGTCAAAGGGGAACACCAATGGCACTCAAACCTAA  
CATCGGGCCGGCAGCAGACGCGGCAAATACGCCTGCAGGCTTGGTCGACTACATCG  
TGCGGTTTCTGCACCCGACCATGTCGGCGCGGACCCAGGTGTACCGGGCGGCCGAC  
GAAGCGAGCGCGCTGGAATTGCGCCTGGCCTACGTGCAAAGCGACCTTATGGAGGA  
CTGGCGCATTACAGGACATCATGACCGTCGACGAGGCTATCGCGCGCCGCGGTGGTC  
GCCGTGGCTGACGCGCCGCGCCTATCGGCGCCCTTCGAAGCGCAGTTCGACAAGAA  
CCGCGCGCAGGACTACGCCATACAGCGGTGATCCGTCAGGTCCACACCGCGGATC  
TGGTCAAAGTGCTGGCGGTCTACCCGACCGAAGGCACCAACCGGATTCGTCGACGTC  
CAGCCGATGGTACTGGAAGCCACGACCACCGGTGTGCTGCTGGAACAGAGTCCGAT

>CONTIG\_310\_length\_1125\_cov\_19.197395

CGAGCTCCTGGTCGCCATAGATGCTGACCGCAGCGGGGATTGCAGCCTGCAGCGCG  
TGCCGCTCCGCCTCGAGGTCGTGCCAGATCAGCCAATGCTCATCTGGCCGTGCGGCG  
ACGACCTGCTGCACGGCTGCCACGCGCGCGCCGAGCGTGTGCGCTTCTCCTTCGCC  
GCGTTCTGCAGCCCCATTGCGGCATCGCGGAACAACCTTGCCCTGGCCATCCCGCTCG  
GCGCCGGCCGTGTTGTGGTCCACCGGCACCTCAACGTAGTGACGGTCAGTTCCGGT  
AGGTCATATCCCTCGTCGAGTTTCGCGCAGCGCGGACAGCTACCGCTGGAGCATGCG  
TTCGACGCTCCACCCTGCGCGGTACCGTGAGTAGAGCGTCCAGTACTTGATGCCGCG  
TTCCTCAGCCCATGCGGGCAGGGACTGCTCACGGCCGTCGTGGGTGATCCGGACGGT  
ACGTCGTGTGTTGCGTGCTTGCTCGGTCCGCGTGGCCACCGGCAGTTTCCCGGCTC

ATATCCTCGGTCGTTGTCGATGCGCTCGAGGGTGCCTCCGACAGGTGGTTGGCCGAG  
GTCGGCGAGGAATGGCACGAAGCGTTGCCACTGCTCACAAACGGTGATGCCTCGGC  
TTCCGTAGTTGCGCCAGTCACGGCCGACACGGTCGAGCATTGACCGCCATGCGACGT  
AGGCAGGCGTGCCCTTGCCGCCGTGCTTTGGTCGCACGCAGCCGCAGCTGACGATCC  
TACCGGCGAGCAGGTGGTTGGAGGTGGCGTGACGCTCGCCGCCGCAGTCGCACCTG  
CAGAGCCAAGCGCCGTCGCGGAGAGCGCCGGGGGTCCATTCAACGACCTGGAGGGC  
CCCGAAGCGCTGGTCTTGGAATTTCTTTTCGTGCTGACATGGGCAATCGCAGAGGTG  
CTGGGTTTCTGGAGGAAGAGTGCCACGATGCTACCCACAGCCAAAATTCTTCGGCC  
TTGTGCGGGTAGAGCGTCAGGTTGTTGGCCTGAGTGCTGTCACGCTTGAACCAGCGT  
GTGAGTGCCTGGCCGGTGTCCATCACGCCAGGAACCCTGCATAGTGAATCAGCTCT  
TTGTAGCGGTTCTGGGCTCGGCGTGCGGTGGCGACGAACCGGTACC

>CONTIG\_311\_length\_1121\_cov\_15.649899

CTGTCAGCCTCCCGTAAAATTGATCCAGCCATAACTAGAGGTCTCCGGCACACTAGC  
CACCAAGGAGACCACCATGCGCAAGAGCAAGTTCACCGAGAGCCAGATCGTCGCCA  
CGCTGAAGCAGGTCGAGGGCGGTGCGCCAGGTCAAGGATGTCTGTCGCGAGCTGGGC  
ATTTCCGATGCGACGTACTACGTCTGGAAGTCCAAGTACGGTGGCATGGAGGCAGCT  
GATGTGCAGCGCCTTCGCGACCTGGAGACTGAGCACAACAAGCTCAAACGCATGTA  
CGCCGAGCTCGCGATGGAAAACCATGCATTGAAGGATGTCATCGCAAAAAAGCTGT  
AGACCCGGCGCATAAGCGCCCGCTTCTTGCTGGCTCATCGAGCAGCATGGCTGGA  
GCGAGCGCCGGGCCTGTGCGGTGGTTGGCGTGGCGCGCTCGACTGCACGTTATCGG  
CGCCGTCCCGATCGGGATGAGGAGGTTATTGCGCTGTTGTCCGAGTTGGCCGAGCGT  
TTTCCCGAGCGCGGATTTGGAAAGCTTTTTTCAGATCATCCGTGTCGCGGACATCTG  
TGGAATCACAAGAGGGTCTGGCGCGTGTACTGCTTGATGAAACTCAATCAACGTCGC  
CGCAGCAAGCGCCGGGTCCCCACCCGTCATCCACAACCGTTGGCATGCGGAGCACA  
CCCCAATGCCGGATGGTCGATCGACTTCATGTCCGATGCGTTATGGGATGGTCGACG  
CTTCCGCACGTTCAATGTCATCGACGATTTCAAGTCGGGAAGCCTTGGCGATCGAAGT  
GGACTTGAATCTTCCGGCCGCCCGCGTCATCCGCACCTTGGAACGCATCGCGGCCTG  
GCGCGGCTACCCCGGCAAACCTTCGCTTGGAACAATGGCCCGGAGTTTGTGCGATTGGC  
CTTGGCCGAGTGGGCCGAGCGCAAAGGCATCGCCTTGGACTTCATCGAGCCGGGGC  
GCCCGATGCAAAACGGTTTCATCGAACGCTTCAACGGCAGCTACCGGCGCGGGCGTG  
CTGGACATGCACATCTTCCGCACGCTGAGCGAGGTCCGTGAACAGACCGAACAGTG  
GCTGGCCGACTACAACCAACAGATACCGCACGACAGCCTGGGCGGGCT

>CONTIG\_312\_length\_1108\_cov\_40.011213

GTTAGCGCATCTACGTAAATATTGAATTCGTTTGAAACTGTTTCGTGGCGAGCTACT  
CGGTTGGAGGTCAACGGTAGCTCTGCTCTTATATTTTGGCTATTTTCCACAAAGTCTC  
CCATAGGAGCACGACCGGCTGCGAATCTTTTCAGGACCGTTTGGCTGCGAACAACG  
ACTCATCAATTCCGATCCAGTTTCGCCCCATTACACTGGCTGCATGAAGAGTTGACC  
CTGACCCGCAAAACGGATCAATGATTAAATCACCAGGATTACTGCTGGCCCCTACA

ATCAACTTCATCATCTCAAAGTTTTTTTCTGTTGGGTATCCTGTTACTAGTATTGATT  
GATGATGAGCATCACGAAAATCTTCCCAAGAATCAGTATATCCAATACTTTTATCTG  
CTGTTAGGTATACCTTCCGTCGTGGGTTCCTGGTTTTTGACCAATGAATTTACCGGC  
AGCGTTTAAGATATCTAGCTTTTCAGGGGTGTACTGCCAATGCTTTCCTGTCCGGGG  
CATCATCCCTTGCCATAGACCGCCCGTTGCACCATTTTCGAGTGCCTGGAGCATGAAT  
AGGGACTAGCTTATATTGGCCTTTGTTATCAACCTTCGGATACTCTTTTGCGATCCAA  
TCGGCATCAGGTGTTTTTAGAGGCCTATTCCAGATGTAGTTCTTGCTTTTGCTGTAAC  
ACAAGATGTAATCATTGAGGTTGGCGAAATTATTCTTTGTTGAATTCTTACTGCTACA  
CTTTCGCCGGGTGATCAGGTTGATAAACCTCTCTCGCCCGAAAATTTTCATCCAGGAG  
AAATTTTAACTCGCCTACCATTGTTGGTGGCCAATATGGACATAAATAGTGCCATCCTC  
ATCCATAAGCTCCCTCATTAACAAGACGCCTACGCATGAATTCTAGATAAGCAGC  
CTCAGTTAGGCAGTCATCATAAGCATGTTCAATTTGTTCTGCTGGAAAACCCCATGCC  
AGTCGCATAGGGAGGATCCAAGTAAATTAAGTTGGCCTTCTTTTTTTCCGATATAAG  
GCGATGCATTGCAAGCCAGTTGTCTGACCAGACGAAACTATTTAATTCAATTGATGA  
GCTGCTTTTTTAAGCCTTTAA

>CONTIG\_313\_length\_1106\_cov\_9.759959

TCACCATCCACCTTCAGGGCGTTCCCACGATTGCCGGTCAGAAGGTCACGCCGCTGC  
CGGCGTTGGGCCAACACGCTCCCATCATGCTGGTAGCACCCAATGAGCAAACGATG  
CCAGCAGTCGGCGCCGGGACTCAGCGGCTCTCTGCAGTACAAATGCCTGAATACGC  
TCTACCGAAGATCTCTGAGGTACAGCGAGAGCGATTGGAGGTACTGGATATTTTTGA  
AGGGCCCGACAACCTAGTCGTGCGGACTATGCCAAGCTCGCGGGCAAATCGCGGC  
GGTGGATTACTTACGAGATCCAGGCCCCGAACCTGCTTTCGATTTCAGTTGGGAAACA  
AGGGGCAGCGGGTACCGGTGTGGCAACTCAACATGTTCAAGCGCCGCTTGGTGCAG  
GCGGTACTCAAGCGCCTGCATCGTGGCGTTGATACATGGGATATCTACTACGCCTTG  
ACGCGACCTTGCGAGGAAGTTGATGGCAAGTCGCCTATTGAGGCGCTCACCTCGGA  
CAATCAGCAAGCGATGGTTGAGGCGGTTTGCCGGGCGGTAGCTGAAGCAGCGACGC  
CAGTCGTTGAGAAGCGAGTCCCCATAAACAGGATTGCCGAATGCATGTCTGAATTTT  
GAGGCGGGTATGAAGGCCGAGCAAGGCGAACGGGGCTTCAAAAGTCATGTCTAAGG  
ACGAGGCCCCAAGTGCTTCTCTAATGGGTAGTCAAACCGACAAGCCTTACTGTTCCA  
CTTACACTGGTGTTCCTGCACTCTCGCAGCATCGTCGAAGTGTGACGCGTTTCGACGC  
TTATCAGGAGGGCCACATGAAACCTTGGCTGAAAGTTTTCACTATCATTAGCTTGGC  
GATCTCCTCATTAGGAGGATGCAACGCGTTCCTAGCAACCGGGAAGATCCCAACAG  
CTTCCGATCACTTGATGATTCTCACGACCTGCCGAACCAACGCCTGTTTGACTGCG  
CCGAACCTCAGCATCAGCCAACCTCTCTGCAACCGATAGTTCTTGGAGAGAGGTCACGC  
ATAAGGACATCAGTAATGGAGTGCTTGAATCCGGAACCTTTGACGATAAGAACCGC  
ACCGGTTTCCGCATGCGTATCGAACGTGCGCA

>CONTIG\_314\_length\_1099\_cov\_6.973251

CTTCACTGGCGCGCATGGTCGTCAGTCCTTCTATGGCTTAGTACCTTGGAGACTGC  
GCCATGCGCGCACTTGTTTCCACTGGATCAGTGGCATAACTTGCTGATCCAGCTAGG  
GAAAACGTGGGGATACCTCAGGGGCGGTATGCCTTCTACAATTATGCTCCGTCATCG  
GGACGGACGTCTAAATCCTCAGACAAAAGCGCGCTACCACAGCGCGATCAGGGCCA  
AGCTTGGGTTGACCGTGCCACGGCGGCGAGAGAGCGCATTGATCCGCGCAAAGCG  
GACCATACATATGAAGCAGCGGTGGCGGTCCTTCGGGATAAACTCGGGCGACCGA  
ACCGCTGGTTCTGAAGGAAAACATTTCTTACGGCTTCTTTCGAAACATGTCCGCGTT  
GCGGCCATTGCGCATGCTACCTCTGCGGTTGGCCTGGTCATTGGACTGTTTCATGGCT  
GACGTTTTTTCGCTGAACCCGTTGGGCGCCAGTTGGGGATCCTTACTGCATCCCGGT  
TTTGAAGGTGGAGTCACCCTGACTGCCTCAGGGATTTTGCTTTTGCTATGGCTGACC  
AGCTTTAGCCACTCTCGGGTTGAAAGCGCGGCTTATGCGTATGCCGAGCGTCTTTTG  
AGCGCTTTTCGATAGGGTGCCATGAGTTGCCCGTGGCTTATGGATGATAAGGGGAGG  
CTTGCCAGTCCGCGCAATATCGCAGGATCTTTTTTCGTAGGCGACGCCGAGCGGCCTT  
TCCTAAATGCCGGCGACAAGTGGGGTGTGTTTCATGAGCATCAAGCCAGGTCCAAAG  
CGCATTGCCAAGTCGACGGGTAAGCCCGATCAGCGTCAGCGTGATAACAAGACGAC  
ACCAGGTAACACGCCTGGTCTTAAGCCCCATACGCACAAAAAGGGCAAGTAGGAAT  
ACAGGGAAAAGTTTCCTTACTGCAAAAAGTGTTGCCTGATGTTTCGGGGACCCGTCGT  
CACTCCGTTTTCGGCGGGTCTCTTTTTCTAATCACGAAGAGACGCAGGTTACGTTTTG  
AACGCGTTGGTTCTGCTCCGATTACCTAAAGTGATTTTCCTCTCATTTTTCTGCGGCA  
TTACGATGTATGAGCTTGGG

>CONTIG\_315\_length\_1095\_cov\_3.206612

GCGTTGGCGCACCAAGCGGCTCGTCAGAGAGTGTTTGGCTCATCAGCCCGGCAAGCA  
GTTGGCCAGCGATTTCGAGTTGTTGGGGATGGGTGGTCATGAAAACCTCCTGCGTGTG  
GTGAAGTCTTCATCGAACCAAGAATCGCCATTACGCAAGAGCTCGCTTTGAGCTGC  
ATTTACAAATTTGAATACGGGTAGACATTTAAGGTCTGGTATGCCCTTTGGGGCAT  
TTTTTAGGATGTGCTTTGGAGAGCTGCCGTATTAAAAACTGAAATGGGGCGGCAAC  
CAAATTTCAAGACATTGGCCAGTGCTAGGGTTCTTTCATTAGGGGGGGGTATCGCAG  
GACGTGTTCTCACCTAGCTCAAGCCAGCTGCCAACAATGCCGCGCAACTCGTCCACC  
CCCTGGCGCGATTTCGCCGAGTAGGTCTGCACGGTCACGCTGTGCGCGAAGCGCGA  
GGTCACTTCCTTCTTGACCTTCTGCAGGGTCTGCATCTGCTGGCCACGGCCGAGCTTG  
TCGGCTTTGGTCAGCAAACCGTGCGCGGGCAGGCCGCGCTCGGCCGCATAGCCGAG  
CATCTGCAGGTCGTAATCCTTGAGCGGATGGCGGATGTCCATCACCACCACCAGCCC  
GCGCAGGGCCTCGCGGGTGCGGAAATAGCGGTCGATGAAGGCCTGCCAGTGCGCCT  
GCAGGTCTGCGGCACCTTGGCGTAGCCGTAACCGGGCAGATCCACCAGATAGCGC  
TCGGGCTGGATCTGGAAGAACACCAGCTGCTGGGTGCGGCCGGGGGTCTTGGACAC  
GCGGGCCAGTGCGTTCTGGCGGGTCAGCGCGTTGAGCGCGCTGGATTTTCCGGCGTT  
GGAGCGGCCGCGGAAGGCGACCTCGTAGCCGCCATCGTCCGGCAATTGCCGGGCGT  
TATGGGCGGACAGGTGGTAGCGGGCTTGTTTCGATAAGGAGCGACATCCCCCTAGGA  
TCGCACGTTTCGGCGCCTGGCGGTTTTGCTGCACTGTTGCTTGACCCTGGCGCAAAGG

CGTGTCGATAATCGAAGTACGCCTGCCACAGCCAGCCTCAAACGCGCGCAGGTTCGG  
GTCCATACGGAGCTTTAGCT

>CONTIG\_316\_length\_1087\_cov\_5.676042

TATACGGATGAGTTCAAGATCGAGGCGGTCCGGCAAGTGACTGATCGTGGGTTCAA  
GGTGGCAGAAGTCGCCGGGCGGTGGGTGTACGACGCACAGCCTGTACGCCTGGC  
TGCGCAAGTTCGGCAAGTCTGGCGTGGTGCATCGCGCCGAGGTGGACCAGAGCGCC  
GAGGTTCGGGCGGTGAAGGCAGAGTTGCGTCGAGTGACCGAGGAGCGCGACATCCT  
AAAAAAGGCCGCCGCGTACTTTGCCAAGGGGTAAAGGCAAAGTACGCGTTCATGCA  
GGCCCATCGCAGCGAATTCAGGCTGTGTGCGATGTGCCGGGTGTTGCGGGTCAACCG  
GGCGGGTTATTACGCCTGGTTACGCTCGCCCGACAGTGAGCGCGCCAAGGAAGATG  
ATCGCTTGCTGGGACTGATCAAGCACCACTGGCTGGCCAGCGGCAGTGTCTATGGGC  
ATCGCAAGATCACCACGGATCTGCGCGATCTAGGTGAGCGTTGCAGTCGCCATCGG  
GTGCACCGGCTGATGCGCACCGAGGGACTGCGTGCCAGGTGGGCTATGGTCGCAA  
ACCGCGCTTCCATGGAGGGATGCAGTGCAAGGCGGTGCCAACCTGCTTGACCGAC  
AGTTCGACGTGACTGAGCCGGACACGGCCTGGGCGAGCGATTTACCTTCATCCGCA  
CACATGAAGGCTGGATGTATTTGGCTGTTGTGATCGATCTGTTTTCCAGGCAGGTTCG  
TCGGCTGGGCGATGCGCGATCGGGCCGACACCGAGTTGGTCGTGCAGGCGGTGTTG  
TCTGCGGTGTGGCGGCGCAAACCCAACGCTGGTTGCTTGGTTCACTCGGACCAAGGG  
TCTGTCTACACCAGCGATGACTGGCGCAGTTTCCTGGCGTCCCATGGCTTGGTGTGC  
AGCATGAGTCGGCGTGGCAACTGCCACGACAACGCACCCGTGGAGAGCTTCTTCGG  
CCTGCTCAAACGCGAGCGGATCAGGCGGCGGACCTATCCCACCAAGGACGCCGCTC  
GCGCCGAGGTATTGACTACATCGAGATGTTCTACAACCCCAACCGTCGCCACGGTT  
CAACTGGCGACCTGTC

>CONTIG\_317\_length\_1084\_cov\_16.571578

ACGGCGCTACGCGCAACGAGGGTCTTGAGTGTCTACGGAACCCTGGGCGTATCAGG  
CGCCGCTATCACACCGGCTTGATGGGTGATCGCAAGTCACTTCAGGAGAATTGCAGT  
GTTGGCAACGCAGTGGCCGGGTGAACTGCTCACTTGTGCGACCACAAGCGGCACAA  
CGGCCTACGGTTATGACTTGGGTATTCATGCGGCGCGGCAAACTAGGGAATACAC  
GCGTAATGCGAGCTTGACCGCGAGCGCTACGAACAGGCCAATCAGCCCGACCCATC  
CGAGGATCAGCGTCAGGGTAATCATTGGAGGGACCCGTTTCGGCGTTAGCTGGCGCT  
CCACAGCTTCCAGCTGTGGCAGCAGCGCTATGGCGACGCTCGCCGCGTCGCGCCAA  
AACGTGCCACTGCCGCAGGCACTGACGCCACTCGCATTGATGGCTCCGGTGGTGTGC  
AGAATCGGCATTGGGCCGATGACATGCCGATGCACCGCGCCATCGGCGGTGTCCAC  
TGCGTAGATCCGCCACGGTCGCGCGTCCACCGCCGTGGACGTGACAAACAGCTGCT  
CCCACGTCTCATCGTTAGCGAGCGTGTCTGATCATCTTCTCTCCCCGCCGGGATGTC  
GGGTGACTTCTAGATAACCACTGCCGTGTGTGGCATTGCGGGCAAGCACCGAGCATCG  
CCATCGAGATGCAGGGCGCGCCGTCGGCCTGGCGGGGTGCACGCGGGATGGCATCG  
CCATCGTCGGCAAGATGGGTATCGGGCGCGGTTCATTGCTATGTGTTTTGGGTATGCC

GTCGCCAGCAGCATGTTGCAGCTGACACACCGGACGGTGGTGCTGACGGCCGGAAC  
CGGTGGAAGCATGGGGGCATCGGCGATAGGCGTGTGGTCATCGTGCAATCTCCAA  
GTCAGACAGCAGGGGGGGTGTGGGCTGGCGGTTGCGCCAGCTCGCCAGCGTGGCG  
CGTGCGATCACGCGACCGATCAATGGGCCAAGCACTGCAAACAGCACCGCAAACAA  
CACGCGGGCAACTGACCACTCGCCAGTGGTCACCATCGGATAGATCAGGGGGAGCG  
GCGCTAGCCAGCAGC

>CONTIG\_318\_length\_1067\_cov\_32.629787

GCGTGATGCATGTTGCTAAGGTATTGCACACTTGCCCTCAAGCAAGCGACTTCCAC  
CAGGAGCGCAGTGCATGAAAACCATCGCCATCGCCGTCCAGAAGGGGCGGCTCCGGC  
AAGACAACGATCGCCGTTACCTCGCGGTGGCCGCGCAGCAAGCCGGCCTACGCGT  
TGCGCTGGCCGACACCGATCCGCAAGGCTCGGCCAAGGGGTGGGCCGAAACCCGCA  
AGCACTCCACGCTTGAAGTGGTGGCCATCACCTCCGCCAACGTGCGCCCAGCGGTCC  
AGGCCGCGAGCCGAGGAAGGCTATGACCTGTTGATCGTGGACACCCCCCGCATGCG  
TCAGCCGGCATCGCGGCCGCGCTAGAGCATGCGGATCTCGCCTTGATGCCGATCCGC  
CCGAGCCTGCTGGATCTAGCCGCCGCGCCGGCTTCGATTCGGCTATTGCAGGCCAGC  
GGCAAGCCGGGGGCGTTTCATCCTGTCCAGCGCCCCGATCCGCGCCAGTGAGACGCG  
GGAAGTGGCGCGGGAGCTAGCCAGCACCGGCATTCCGGTGCTGGAAACGGTCATCC  
ACGACCGGACTGCCTACCGCCGCGCCCTTGCTCACGGCCAGGCCGTGGGCGAATTTG  
AACCGGCCGCAAGGCCGCATTTGAAATTCGCGCCCTGTGGCGTGAAGTGCACACG  
CTTTTAAGCACAAACCAAGGAACCCACGTATGACCACTGGACTCTCCGGCAAGCTC  
GGCAAGCTCGCCGCCCTGGACAAGAACAGCCAGCCAGACAAGCCGGCGCGATCGGC  
CAAGTCGGCCGAACCAACCACGCAGCCGGCTCCCAAGGCCGGGACGGCGAAGAGC  
GCGCCCAAGGTTGGGGCCAACCGTACGATCACCATCCGTACCTGACCGACGAGGA  
CCTGCGCCGATCTCCGAGTTTCGCTACACCCACAACATGACCATCCAGGACGTCAC  
CATCAAAGGCATCTCGATGTTCTCACCTCGATGGGTCTTGCGCCATTGTCAGCTCTG  
GCTGACACGCCCAGTCCAGCGGCGACGAATAGCGCATGCGAGCATGCAAAG

>CONTIG\_319\_length\_1065\_cov\_11.328358

GGAACCTCTGAACAACGCACCGCAGATAAGCGACACTACCCCCATGTTGAGGAGTG  
ATCCATGCAACTGACGTTTCGGTGACGCTGAGGGCCTGGGCAAGCGCAAGCAGACTC  
GCCGGGAGATCTTCCTGGCCGAGATGGAGCAGGTGGTTCGGTGGCAGCACTTGCTCG  
GTCTGATCGCGCCGCACTATCCGGTGTGCGGGGCGGCCAGGTCGGCAGCCGTACGCA  
CTGGCGACGATGTTGCGGATTCATCTGCTGCAGCAGTGGTATGCGCTGAGCGATCCG  
GCGATGGAAGAAGCGTTGCACGAGATCCCGATCTTGCGGAGGTTTGCCAGCTCGG  
TGGCTTGGACAACGTTCCGGACGAGACCACGATTCTCAACTTTCGCCGCCTGCTGGA  
GACCCATGGCCTTGCCGCGCGGATGCTGGAAGCGGTCAACGCGCATCTGGCACGCA  
AGGGGCAGAGCCTGCGGTGCGGCACGATCGTCGATGCGACGCTGATCGCTGCACCC  
AGTTCGACCAAGAATGCCGACCATGCGCGCGACCCTGAGATGCATCAGACCAAGAA  
AGGTAATCAGTGGTATTTTCGGGATGAAGGCGCACATCGGCGTGGATGAATTTTCGG

GCTGGTGCACCACGTCCATTGCACAGCGGCCAATGTCGCCGACGTACGGTGACGC  
ACGCATTACTGCATGGCAAAGAAGACAGCGTGTTCTGGCGACAGCGGCTACACCGGT  
GCGGACAAACGCGAAGAACTGCAGACCTGCCAGGCTGCATTTTTTCATTGCCGCCAG  
GCGTTCGACGCTGCAAGCCATCGGCAACAAACGCGAGCGTGCTCGGGAGCAGCGTT  
GGGAACACTTCAAGGCCAGCGTGCGCGCGAAGGTGGAGCATCCATTCCGGGTGATC  
AAGCGCCAATTCGGTTACACCAAGGTCCGCTATCGCGGCCTGGCCAAGAACACCGC  
ACACATGCTGACCTTGTTCGCGCTCTCCAATCTGTGGATGAAGCGAAAGCAGTTACT  
GCCGACTATGGGGAGCGTGCGCCTGTAACCCGGGGAATTCCCAAGGAAAGTG

>CONTIG\_320\_length\_1059\_cov\_4.254292

GACTCTCAGCCATGAAAATTGCTCGCTGCACGTAAAACCGGCTCTGGGCATGGTGTG  
GATTGCATCATGGCCGTGGCAAGTCGTGGCAGCATCTCGCGCAAGCGGAATCGACG  
ATTAACGATAGGCCGCTTCTCCCAGGTAACGCCTTGCGTATTTGCCTTGCGCGAT  
GGCGTGATACACGCCACTGATGGCGCGTGTGAGATTGCCCAGCACCACGTTGAGCC  
AACGTGCACCGGCCGTTTCGGTTCGCGGCACGACCACCGCCAGTGTCCAGCGTGGTGT  
GCGCGTGGCCGGCGTCTTCTAGCCGGCGGAAGCAGGCCAGCCATCGGTGTAGACC  
TCGCATTCGGGCGCCAGGCGACGGGCAATCCAGTCCTGCAGCGAGGTGTTATCGAA  
GCTGCGCACCGGCTCGATCACCACAAAGCGCGGCGCGGTGAAGGTAGCATCGGTCT  
GCACCGCAATCAGGAACGCTTGTTCGTTCTCCGATCCGCGTCCGGCCTTGCCACCGT  
TACGCTCGCCGCCGAGATAGGCATCGTCGATCTGCACGAAACCCGCCAGTTTCCGCA  
TGGATTCGCGCTCGGCCATAACCTGCATGATCTTGTGTTTCATCCGCCAGGCCGTCTT  
GTAGTTGACGCCCAGATGCCGCATCAACTCCAGCGCGGCCATGTTGGTTTTGGTCGA  
GGTCAGCAGGTGCAACGCCAGCATCCAGGTGCGCAGCGGCAGCTTGGTGCCTTCGA  
ACATCGTGCCTGCAATCAGGCTGGTCTGATGCCGGCACGCGCTGCATTGGGAGTAGA  
TCGAGCACCCCGCTTGAAACGCGAGCGCACGCGTCCGGCACAAACAGGGCAACGA  
AAGCCTTGCGGCCAGCGCCACTTGTAAGCGCGCGATAGCACTTGGCTTCGGTGCCG  
TAGGACGCGAAGAACTCAGGCATCGACAATCCCGCTTGGAAGTGCACGGCATTGAT  
ACTCATCACGCCACCTCGTTGGCTTCAGGTGACAGCAGCATCCACCCAGCGCGGCGC  
AGATCCTGCGACAGGCGGCTGATGGTCAGGGCTAATCAGG

>CONTIG\_321\_length\_1052\_cov\_114.576216

CGTCGACCGCTTCGCGCTGGTACCAGCGCGGTGTTTTGCGAGCCATGTGTGGGTGC  
CTGCTCTTGTGGGTGCGTAACGCCTACGTTACAGCAAAACGCCTACGTCGTAAAGC  
CTAGGCGTTTGTGTGGTCAATATTCGATGCCGTTGACTCGGCAGTAGAGCTCGTTCC  
AATAATCAAAATCCTGAGGGGTGTCTTCCCATACGAAAGCATAAATTAGATTTGACG  
CAGCGTGTTTAAACCACGCCTCAACGGGCACCATCTCCAACATCCGCAGCAACTCGG  
CGTGGTCCTGCTTGCGCACCGACTTGACAGAGCGACTTGACAGCGGCGAATCTTTGA  
CGTTCATAGCGCGCGGTTTCTTGCACGTAGTTTCTTTATATCTGAGACTATTAACAGC  
CCTTTTGGGTCAGATATTACGTCAAGTACGTGGCGACCCTTAAAGCCGCTCGCGCAC  
ACTCTATCGGCGGCCAATGCAGTCTTTCTTCGTTGCGCCCACTGAGTCACCTCATCGT

CTGTAGCTGCATCGCGCAGCCAAACATAGAAAGCGGCTAATGTATTATTTGGCGCAT  
TCATGGTCTGGGTCTCGTGGTGGGTATTTGACGGTGCGCATCTGGCGAGTGCGCAC  
GTCGAGTTGCTTATCGGCTCGGTGCGGTATCTGTTTCTTGGCGAATGCGCCAGGCGA  
CCATACGGCCCAAGGGTGGGACTTCTTTGGCTTGTGGGCAGTCATCGTTTTAGGGCC  
TGTACGAATTCAACCCACGCCAAGGTGCCAAAGTGCAGGGTGGTAAAATCGGCGCG  
GCTTCCATGAACTAACCCGGCAGACCTATATTGCCAATCGCCGTCCGGCCACACGAA  
GATATCACTGGGGTGCGGTTCGAGTCTCACGGCTTCACCTTTGCAATGCTGTCCAGG  
CAGTCCGCAGTCGCTGCCCCTTGTGTCTCGATCTACGATCGCCCACTGCGACGAC  
ACGTAGGCCGCGAGCCAGGCCATCCAGTCGGTCGACGGGCCACCGGTGCGATCGGT  
CGGCGGATCGCTGCTATCGATCGCCG

>CONTIG\_322\_length\_1028\_cov\_30.841287

AAATAAGCTTAATCCATGGATGTCGCAGGAAAAATTCCTTAATTCGACCTTCGCCAA  
CTGGTCGAGTGGGCAACCGGTAGATCAAACTGCGATCCACACAAAAACAAAGGCT  
GTTGCTACGGAAACCCAGGGGAACGAGCGAAACATTCCAAGCCCTTGCAGCACGAT  
GGCATAGTAGCCGCGAACAACCTTCCAGTCGGCCGATTGGGGAAATAGGTCGGCTT  
GAACGCCCCAGGCTTTGAGATAGCTGGTGTAAGCGACATGCCCACAGCCGTGAAGC  
ACGATCCCAGCCAGCGTTGTCATCGCAGCGAGGCTGCCAACGAAACGGGTGATGGA  
CCACGACCGTCTGGAGGACGCACTGTTCGCGTCTTCTGGTGACGAGGTGGAACGCTT  
CGATCGGACAATTTCCGGTATGGCGCATAGGTTTGTAATTAATCGATTGCGAGACAGT  
AAGTTTCCTGATAGGTGGGCTGATCAAGAAGTTTGACGAATTGTACAGATGTAGCAA  
TCCTTGCTAGTCTTGTCCGCCCTAAATAAGGAGGCGAAAGTACTAACAAAATACCT  
GGACTTGCAAGCTATTCTGATCCGCATAAGATCATTACACCCATAGATTTAGCAATG  
CGATTTCCAGAGGTGTTAGAAAACCTCGATTAAACCGTTATCGTTCAGATGTGCATCTT  
TTCAGAGATTTGGTCAATAAGTCTATAAGTAGTGATGAGCTGCTTAAGAAAATTAGG  
TCCGGCGGGTATGGCGCTAAACAGAGGATGACATTATTAATAAATATTTAGAAGATG  
CGTGTGCCCATTGTAGATACTGAGATGGCCAAGAAGCTCAAAGTGCCTACCGATA  
CGCTTATCTCAAACCTACGGGGATTATTTCAAGGGCATCGATATTGTAAAGAGCCAGT  
TTAATGGCTTCACTCCGTTGGAGGAAGCCGCGCTGGCAGCGTTGGTAGGTGAATATG  
ACACTCGCGGCCAATCTGGATATATGCTTACTGGAATGTTCTTCGATTGGTTTAATG  
GGTATTTTCG

>CONTIG\_323\_length\_1026\_cov\_10.144605

CCTCTATGTGATTGGCGACAGGAATGACTGGAAACATCGGCCATTGTTCTGTGATGT  
GATGGATCTGCTACCGATTTCAGGACATTCGGGCGCACGAGTAACGGGCTTTACAGC  
AGCATAGAGGGATGGACTTTTCGCTTTACTGTGAGTAATTGCATGGACTTGACCACC  
TATTTGCATTCGACTTGACCAGTCGTTTGCATCGGATTTGACCAGTCCGCTGGCCGAC  
CCTGACCGGCAGAAATCGGCCAGAAGCGGTCAATTTGTTCTGCAACCAGTGCCCTCAC  
TCAGACACCAAGACGAAGGCAGCTTACAACCATGCTTACAGGTATGAGCGAGCAGA  
ATTGATGGCTTGGTAGGAACGCTCCTGCGTATGATCAAGCGTCCAGGTAAACGGAG

GTACTTTTAATGAAATCATTGAGACGACACCGCGACCTCCTACCCGTTTTGGGTTGC  
TGGCCACAGCAGTGGGTCAAAGATGATGCCGTATGGCATATGTTTGAGTTACAGCTG  
AAGCCGGACGGAAATGTTGATTGGTATCTTCGTCGCGACGATGTCGCCCATGGCGGC  
TATGGCCCGATTACCTATCAAGATTACGATGCTGCCGTAACGGAGGCCAAATCCACA  
AATCTCCTGCTTAAAAATGCTGTAAACAATCTTGCCTTACCGCTTGAACAGTCCGAG  
TCGATACGTTTGAAAGTGCAAAAAGCGCTTACAGCTGAAGAACGGTTGATGAGCGA  
GGAAAGGCTCATGTTGATGGAGGCTATCAAGCGACATGAAGCGGACCCTCAACCTC  
GACTGGAAGACCTGACTGTCTTAAATGGTAACGACGTCATACGAGCAGAACTCCAT  
AGGCGCCTACTGCAATATCCCTATGTGCAGCTAGTTTTCTTGGCGCGGCGACGTCCA  
CCCAATTTTGAGTAGCGCCTCAGTTTGGAGTCCAATTCCCTACCCCGAGGAGATTGG  
ACGTGAAGAAACGTTTTACTGACGAGCAGGTCATCGGCTTCTGCGCGAAGCCGAA  
AGCGG

>CONTIG\_324\_length\_1014\_cov\_9.708005

GGCCCGCAGGGACGATAGCCAGCTTTGTCGGCCTGCTCGCGGGCAGGACGCAGAAG  
GTTGCCACCATCGAAGAAATCAACGAGGCGGCGGCGCAAGGCTGGGCAGGTAAGC  
AATGAAGGTCGCAGTCGATACCAACGTCCTTGTGCGTGCGGTTGTGCGTGACGATCC  
CGCACAAGCGGACGTTGCCGCCGAGTCTTGACCGACGCCGAGTTGATCGCGGTGCG  
CGTTGCCGTGCCTATGCGAATTTGTTTGGGTGCTGCTGCGTGTCTACGGCTTCCAGCA  
AGCCGACGCGGCCAGCGCGATCCGGGCACTACTGGCCGCCGCGAATGTGGAAGTGA  
ACCGGCCTGCCGTGGAGGCTGGCTTGCTGGTGCTCGACGCGGGCGGAGACTTTGCC  
GATGGCGTCATTGCCTACGAAGGCAACTGGCTTGCGGGGAAACCTTCGTTTCCTTC  
GATAAGAAGGCGGTGGCACTTCTCACGGCGCAAGGGCAATCAACGCGTCTTTTGTG  
ACGGACATGAGCATGAACGAATTCCGTCGACTGGCCGCGAAGATCGACCAACACAT  
GCAGCAGCTTGCCGCCAGGGTGTCAACGAGACCCATGCCATCGTCAATCGCATGA  
TGGGGTACGGGCCTGACCTGCACAGGATTTGGGTGCGGCACATCCGATCAGCAGCTC  
ATGGCGCTGTCCCGCGAGTTTCCAGAGTTCTACCGCTACGCCCAGCATCATGGAAGAG  
GCATCCGAAGCCGAGCGCCGCAAGGCTTCGCGGCCCTATGACGGCATGGCCGAGTT  
CTCCGAACAGCACAAGCAAATGGGCGCGCAACTGCTGACCACGGCGGCCACGCTTG  
AGCGTGGCTACCAGGCGTTTCGTGCGAGCGGCAATCTCCAAGTCTTCCGGCCTCAGC  
TCGACGAGCTGGGCCCGCCTGCATCGGCAATGGCTGTCCGACCTGGACGCCTTCAA  
GACTCGCTGCGCACGCAGGGCGCAGAACCCAAGGTGCTGGAATACGTGAACGAGGC  
T

>CONTIG\_325\_length\_1004\_cov\_6.367161

GCACGATGTCGGCCACTTTGAGTTGGGCGATCTCATTGATCCGAGCGCCCGTGAAAA  
GGGCAATGAGCGGGCACCACCAACGGTGCGGATACTTCTTGGCCCAAGGCAGGAAG  
GTCTCGGGGTTGAAGATCTTCTGGATTTCCTCTGATGAAAGCAGCCGTTCTGGCTCG  
TCTTGGTCAATGAGAAGATCATCTTGGGGCTTCGAAAGCATCCATCGGTGAATGC  
GGAATTGCTCTGGCCTTGGCCAGCTTGTTGAAGAATGAGTTCAAGAAGCGGCGATGC

AATTCAAGCGTAGCGTTGGCTGGTTGTGTTCTGCCCAGAGCCTGCCCTTTGGCGATC  
AGCCCTTTGACGTCGAGCTTTTGATAGGCTGGATTGGACATGAAGTCCTCAGGGGCC  
CAGCGCAACAGATCCCACATCTCATAGATATGTGTGTGATTGATGCGCGCGACGGA  
GATGTTGCCGGTCACGCGATGCAGGACTGCAAGTGTTTCGACGATAGGCGTCAATGG  
TCGTGCGCTTGACATCTTGGCGATCCTTGTCAATTGAGGAAGTCTTCTATCTCCTTTGA  
AAGGAGCCTGGCCGGTGTGCGGAGGCAAAGGTTCTGGATAGCGCGTGCCCGAGC  
GACGAAGTCGGCGCTTGCGCTCTTGATCGTCAAGTGTCGCTTGAACGAGATCCTGAA  
AGTAAACAGCGCCAGCTTGGCTCGTGATGCGAATATTCTTAAAAGCGGATTTTCCGC  
TACGGACTTCTTCGATGAAGAGGTCACCGATGGGGTGTGTCAGATAGTGCTGTAATT  
GAGGAATTTGCAAAGGCATCTACTTATCCGTGTGTGGAGGTAGATTTGTGATAAGGC  
AGTAACAATTTTCGTCAATACGAAAAAAGAGACAGAATTTTCATTTGGAAGATTGCC  
TGAGTCGGGTCTTTTTGCGGTGATAATTTTGTAAATATAAGTAAATCTGTTTCGTCT  
TTTTTATAAAATAATGTAGGCGGCACGGGGATTTTTG

>CONTIG\_326\_length\_992\_cov\_10.324855

TCCCTAGGAAACCCTGGGCGTATCATTCGTTGATTAATCCTGGCCATTTTTTCATTTGC  
TTCCTCGTAAGAATATGCGTATTCCAAAGGTTTAGGTTTTAGCTTGAGTGAAATTACT  
TTGAATATTGAATCATCAGGTGCGTAAAGCATTTAAGACTCCTATTAATTGCTTGGA  
AGGTGTGTTTATGTTTTTTACTGTTTTTAAGCGTGGTATTAATGGTTGCTCAAATAGC  
GTAATGCAAGTGTCATAATGTTGGACGTGACTTCCCCACGGTCCAAGCCATGCACCA  
TGGCTATCCGGCACGATTTGCTGCACGATAAACC AAAGCGGGCATAAAACGGGTGC  
GTGTGTCGGCTGGTATCCAGCACGACTCGCTCAATGTCCGGCGTAAGACGTATCGCT  
TCAAGGCGAGCCATGAGCAGCTGTGTTACCAAGCCCTGGCGCTGTAGCAGCGGATG  
CACCATGCCCCAGCCGAGGCTTTCTGTCTGTGCCACCCGTGCTGATGGAGTAGCCCGC  
ACAGGCCACCAGCTCGCCCGCACGCTCAATGACGTGATAGTGCCAGGCGGCAGCGT  
GGTGCGTTAGAAAGCGCACGAATTCTGGTCTTTCCTCAGCGCATAAAGACGCCGGCA  
CATTGCCATCGAAGACCGCCATGCACGCGTCAAAGTCGCGAGAGCGGTAGGTTCTGA  
ATCGTATCCAGCCGGTCAGTTTGCCTCAGACACGTAAGCGCACTGCAAAAGCTAATG  
CGCAAGCGCAAGCCTGGGCCATGCGCACGGTGCTTTGTCCCATAGACCCAGTGACC  
GATAACCCTGCAGCTGTCCTCTTTACTCAGGTAGGTATCTGCCAGCTAGCTTGGGTCT  
CAGCGTTTTTCATCTCCACCAGCGCTGGGCCTCTGAAAGGGACCTTAGCTTCGCTGTC  
CCGACCGCAAGGACAGGCCTCCTTCTCGACGCTGACGCTTTGTTGCGGCCCTTCGCT  
GTGCGCCGCTTGCGCGGTGCTCGC

>CONTIG\_327\_length\_987\_cov\_16.565116

ACTTTCATCTTCCGATCCGCATGAGTGAAAGCGAGGCCACCGGATTGTTCAAGCAGG  
GCAGGGATGCCAGGGACGATCTGGTGGTCTTACCCGTCAAGCGGGTCTGGTTGGAG  
AACGGAGGCCCCGCGTGCCGAGGTGGACGTGCAACGCGTCCAGGTGGGTACCGAAA  
CGAGGTCATCGGCGTGGATCTGACCAAACAGAAGAAGGGAGAGTCGTGATGCGGAC  
CATTCAACGTGTATGGATTTGCGCGTGCTTCTTGGCGTTGGGCTTGTCGGCCTGTGGT

TCAGAGCATGCGCCTAGCAAGGAGGACGCTGTCAAAGCAGTAGAGCGATTCTTTAC  
TGAGCAGGGGAGGCAGGCAACGCTTCAGCGGACTTGGCGGTTCTGAAGTCAAGGAAG  
CGAGCGGGCTGGAGATCGTCTGCACAAAACGTTGATCAGGACTGCCGG  
GTCTCCGGGACCGTCGATGCACTGGGCTTCATTGGCGATCAGCCCACGACGCCGAA  
GGCCAAGGAAATGCGCCTAAAGATGACGATGAAGTTTCGGCCGGTGGGCGAAGGTT  
GGGAATTGGTCGATGTGACCGATGACGGAACATCTGCGGGCTAACCCTCTACCAACT  
AGTTGCCATGCGGTTGCCGTGACGCCGTTTGGTCTTGCTCCTAATAGAGGAAAAGAA  
ATGAACCACCAAGCGAACTACCAGCGGCTTTATGCGCCGACCGGGCCGGCTGCCAT  
GATCCTGCCCTTCGTTATTCTCGGGCCTTTGGGCATGCTGTTGTTTGGAGCAGGCCTC  
GACGCTGTCTTCAAGACCCAGCAGCTGATGGGCTTGGTCTACTGTGTAGGTGGGCTG  
CTGATCGCCGGCTTCCTGGCGTTCTGCTTGATGTTGCACATCCGCGCCCAGCAGGTC  
TGGGCTTGGCATGTCAGGACCGGCCGATTCCTATTTTCGCAAAGGCGGATTCCTG  
AAGGGGGCGCTCGTGGGCGGCGGGG

>CONTIG\_328\_length\_987\_cov\_14.430233

CGCGTTGCAGGATCATAAACTGGCGGAGAGAGGGGGAGGTACTGATCCCGATCCA  
ACTTCCTGACTCTCCTACAGCCACGCAAACCAGGAGGGTGTCTTGCTTTGTGGTCTG  
CCATTGTAGCGGGTCTGGCATGCTCGCCGCTAGCCTTGGGGCCCACCCCATCGCCAA  
CCTGAGCAGGCAGCTCGCTGCCCCGGGCCATCGCCGAGACGTTGGGCGAGGATTACG  
AACATGAAAGGCGCGGTCCCCACGTCCGGAATGCGAAAGCCATCCACGAGAAGAA  
GCAGGTCGAGCGCAACGCACGGCCAACAAGATGAAGAGAAACGCGCGGGCGACCAC  
TCGCTGCAGATGCTGACCGAATTGGGGAGTGCCGGGGGTGACGTATCGCCCCCGCC  
TCGTGCCGCCAGGACACCCTGACCAACTAACGCCCCCGGCGCGGACGGGAATGAC  
GCAGGCGACGGCGACGGGGAAGTTGCCTTACGACAGGCAATCGCTACGCGGAAGGC  
GATTGCCCGCCTATGCCGGATGCCGGATACCGCGCTCGCATATGCGCGCAGATTTAG  
GGTAGGCGGGCGGACCCTGCCTACCGGGAGCGCACCCGGAGCTTTCATCGCGACGA  
ACGCACCTACCGCTGGCAGCACATCGAGTCCGTGCGGATCGTCTCTCCCGGACAAA  
GCTCGAAATGCGCGAAGAACACGGCTTGCGGGCCGATTTCGCTGGATGGCCTCGTGG  
CCGGCGCATTGAGACCTCCGGTGGCTGGCGGCTCGCGCTGCGGTCACTGCTCGGCGA  
GGGGCCGAGATGGATATTCTCTTAGCTAAAAGCCCAGCCCCAATGCGAGCGATAAA  
TTGTCCTGATTAGCCCCGACTCTCAGCCATGAAAATTGCTCGCTGCACGTAAAACCG  
GCTCTGGGCATGGTGTGGATTGCATCATGGCCGTGGCAAGTCGTGGCAGCATCTCGC  
GCAAGCGGAATCGACGATTAAAACGATAGG

>CONTIG\_329\_length\_984\_cov\_10.815636

GAGGTCTGTGTGTTAAAGAAGCCGATGTACTTCAGGTGAATTAATTTATATTTAGGT  
CATGCATCTATGAGGCTTTCTGTTCTTTTGGTTTTTCCAATTTTATATCTTCCTATAAC  
TGCTTGTGCTCAAGGCTGCCCGCCAGGGCAGTATCAAATTGGTGGGCAGGGAGCTAT  
CGCATGCGCTCCGATTCCCCAAGGAACTCAGAACCGGCGGCACCTGCACCTCGTCC  
GCTAGGAAAATGGATCAAAACCTGGGGAGCTATAGCAATGGGGTCTGTGCACTCTA

TTTTTAGCTACGGCGTAACTACTGGCAAACCTCTCGAAATCTGAGGCTGAAAAGGACG  
CACTCAATCGTTGCGCCTCCCATGGCGAAAAAACTGCAAGATCGGGCTTGCTTATA  
ATAATCAATGTGCTGCTATAGCCGAGCCAAAAGTTAACGGGAAGCCATTTTCAACTG  
GCTTATCAAATTTTGTGGGTGCTGGGACAACTGTTGAAGCAAGTAATGTCGCTTTAG  
AAAGGTGCAGAGCTGACAATAGACCTACGCCGGGAGTAGAGTGCAAGATTATTTAT  
GAAGCATGCTCGGAGCCTATTTTCGAAGCTTATTGATCACTCCCAGTAGGCACCTCA  
ATAGGCCCAGACTTCGACATCCGGTTTGACATTCATAGCCGTGGCTCGGAGATAGAC  
GTGAACGCTACTGGCTCACACTCAAACAAACCAATGAGGGGTACACCTTCAGTCAT  
CAAGCGAAGTGGATGCGTCTGAATGGATCGGCGGTTATGAGTTTCCTTCCCGGAGCG  
TCAGGTATGGGTTGTTTGGCGGAAGCTCCCCGAATACACCCTGCCAACGCTCAAGCA  
GGTAGCCGTGGAGCCGTGCGGATTTGCGAGGTCCGGTACTTCGCACGTCCAGATGT  
TCAGGCCATTGGCTTGCTTACGGTGTAGATGCAATTTCTCAAATCTCTTTTGCGCCCA  
CTGCCAATCTGCCAT

>CONTIG\_330\_length\_973\_cov\_5.959811

TTGTTAGGCGCCGCCCCGGTGATCTAGTTGCCGGACTCAGCGCGCCCTTTACGAATTG  
CCTCGGCATATTGCTCATCACAAATATACCGCTGACCCGGGCCAGCCATCTTCTCGC  
AGACCTGTCGAACCTCCCTGGCCCTGCTCTCGTACTCCGGGATGCTCAATCCGAACA  
GGAGAAGTGCAAGGAATAGTGCAACAGGGACTCCAATGACCCACGGCCATATCTTT  
GGCCGAGGAACTACTGCCCCGCACTTTGGGCAAGCTTTAGCCGTCGTGCTGATTTCA  
GTCCCGCATTCCTTACAAGCGATCATTGCCATCTGCGACTCCCCTTTACGCCACAAC  
AAGGCGCCTAACGCCTGAATTAAGCCGACCCGCGAAGCGGGTTCGGCTTGAATGAA  
TTGTTAGATTGCGGCTGCGGAACGCTGCAGGGGAAAGCATCTCGCAACGCCGCTGC  
AATTAGCAACTCCGCGTTCTCATGCCACTGCGCAGGACGTTCTCAACGTATTTGCG  
AACAATGGCGCCGAGTTGCGCTGAAGAAAGAGCCTGGTCACCGAAGCAATGAATAC  
TCGCAATGTTGGTCACTTGCAGTGCATGAGAATAATTGGCGATGCCAGACACATAAC  
CCTGTGCCAGGCCAGCAAAGTACGAGTATTTTTCCCTCTCTACAGACGACTCGGCCT  
TGCGAAGCCCATCAAGTAACTCCTCTCCAGTCATAGCGCTCGCATTCGAGGTGAGTA  
AGAGTAAGAGCGTCGCTGCTGGGGCTAATAACTTGCGCATATGGTTCTCCGCGATCT  
AACTACTATTGGACCGCCGAAACGCGGTGTTGTGGCGAGTATCTTCGATCGCGAGCG  
CTTTGTGAATGGGGTAACTCTTATCCCCAGTCAAGGGATCGCACGTTAGTAAGCGGG  
CGCGACCATGCGGATGCTTGTTGCGTTATCCAGCAAGGACGCAGGAGTATGAAATA  
CACCTACAA

>CONTIG\_331\_length\_968\_cov\_2.378121

CAGGCCATTACCCGCGCGGCGACAACCCTGCGTCCGGCCATGTGAGCTACTCACAG  
CGAGAAAAGCGAGCCCGCAAGAAGCTGGGCTTCAAGGCATACGACCGTGACAGAT  
CCAGGCGCTGTTTCGCGCCTGATGCGCTGTCCAAGTTGTCCGAGGCCGCTCGCTGGGC  
GTCGCTCATTGGACTCTATACCGGCGCCAGAGCGTCGGAGGTCGGTCAACTGCTTAT  
CAAAGACGTGTTTGAGGAGGACGGTATCCCTTGCAATTCGCATCTCAGACGAAGGCG

AGCACCAAAAAGTCAAAACCGAGGTCAGCCTTCGCACGGTCCCGCTCCATCCAGAG  
CTACTCAAGATGGGTTTCCTGGAATGGGTCGATGGCAAGCGCGGAGCTGGTGAAGT  
CAGGTTATTCCCTGGAGCTAAAGCAACGGCGGTAAACGGGCAGGGCAACTGGATCA  
CTAAGGCCTTCAGTCGACACCTGGCCGAGGTTGGGAAAGGCTGGGCGCCGGCCAAG  
CGCGGTTTCCACTCGCTTCGTAAGACTTTCATTCAAGAGTTACAGGGGGCGGGGGTG  
GTGTCAGAACTCCGCGCGCAGATCGTTGGTCATGAGCTCGATGACGAGCATCATTG  
ACCTATAGTCGTTGGTTACAGCGGTGGAGAAGCTAGGCGGACTCGGTGCGCATTCA  
CCAGGCATAACGTCCCTTGTGTTGGGGCCTCCGATGACATCGCCTGCGTGGAAGATGG  
CCAAGCACCGGCAACGGTTGAGAGTCTTCCTTGTGTCGCTTGTCGAGGGTAAACATC  
TGGCGGTGAATCCGTTGGCGGGCATCCGGGCGATTTCCACGCCTGATTCGGAAGACA  
CCGGCTCGCCTTTCACGGATGCCGAGCTGAAGGCCATTTTTGACCCAGTGGAGTTCC  
CGAGATGGGCGGCGAAATACCCGCATCGGTGGTTCGGGCCGATCCTCGGTCTCTACT  
CAGGCG

>CONTIG\_332\_length\_965\_cov\_17.631265

AGATCGGCTCTTGGATCTGCTCTCGGGCTTTGGTGACTTGGGCATACCACGTCAAGA  
GTTCTACCTTAGCAATCGAGCGTGGCGTGCTCTTGCTGATCAGAAACGGATTGCCGT  
GCTCACGCTTGAATTGGTCGAATTGGCGTCTCGGGATGCCGAGGTAGAACTCCGCCA  
TGGCTTGCGTGAAGCGCGTCGTGCTCGCTGAGCGATCAAGTCGTTGCCTCAGGCCAT  
CGAAATCACGGCTGGCGATGATGGCCTTGCGCTCATCACTCGTCGCGATGACTTCAA  
GTGCTGCACGGAAAAATCCGTCTTCGAAACTTTCCGCCTTGCTGATATTGGTCATCC  
AAACCGTCCTTCGTTCAAGTCTCACTGCAAGCAACTTGCACCGCAAGCTTTGCCACT  
CACCAGCCTGACGACCCGTGGGCGATGGTGATGGGGCCGCAACAAAGCCTAACCTG  
TTCGTGGAGGAAGCACAGCGCAAAAGCCATCCGCCGTGCTAGCGACCCAGTGCACG  
GCGTCTTGGCTACCTGTGGTAATCGCGAGTTGCATGTGAGCTAACACGACCAGCGCG  
TTGCTTTGTTTGACCACAAGCTCAACCAGTTCAAGTGGAAGCCCGTTTCGCAATCGA  
TGAAGCGCGTGTGCGCCTGCGTGGACAAAAGAATTGAGCGCCACCCAGGAATATTT  
CTTAAATTCCCAAAACGCGCGCAACGGCTCGGCTGCCTGCTTCACCGCTTCAAGAGC  
GATTAGCATCTTGAATAGCATTGGCAAACGAGCAGCTAGTGATTCACTTGTCGGTGC  
CAGCTCTTCTTGTAAGCAGGCCACCTCGGTATCGCTTGCGCAGTAAAGGACCCACAC  
GGCGCGCACCAAGCGCTTCGAACTGCGCTCGATGAACGACCAGGGTGGACGGCTCAG  
AACCGACTACGAGTAAGCAGCGACTCGCAACAGCGTGCTCAATCGAAAGCAGGCAA  
A

>CONTIG\_333\_length\_957\_cov\_20.616867

CGGCACGCGCTTCCAGTGCGTCTAGGAACTGCACCTGGGTGCGTGTGCGGATAGTGG  
TGTTCTTCAGCTGCTCAAGGCGACCAGCGGCCAGCTGGTCGTCAAGGAACGTGCGCC  
CGATGACTTGGCTATGGCGGTTGAGCGAGCCTTGCGCCTTAACGTCCAGACGCACGA  
ACGAGTTTTTGTACGGGCAATGGCTGGATCACCATCGAGCCGCGCCAAGAGGTCTG  
GCGGCACACGGAACGTGCCGTACGGCAGCTTGGTGACATGTCTCGGCTCGCCAGC

GCCTCCATGCGATTGACGTGCGCATCGATGTAGGACTCCGGCGTTGCATTTCGCAGGC  
AAGCGCTTCGGGTCCACGCCTTCACCTCGGCCAGATGCGCGTCCGGGAGATAAAC  
GCCGCTCTTCAAGCGCCTTAGCACGTTCTTGTCCGCCGACGTGGCGGCTGGCGGCGT  
GTAGGTGCCCAGCTCCACGGTGTGCGCCGATGCGTCCGCGCTCAGGCATGTGTGCTC  
TGAGTGATGCTAAGCGTCGCGTAATGCACCTGGCCGTCGAATCCGCCAACAAATGA  
CGTACTCGGTGCCTGACAGTTTGTCTGCCAATCCGCGATCAAGGATGACACCCTGCA  
CAGGTGCAGCTTTCAGACTGTCCTTGTGCGCCAGCAGTCCACGCCGGCTACGTTTCGG  
CGTCAATGTGCGGCTTAAGCTCTGTTGCTAGCCTGCGCTCTTGCGCCATCGCACGCA  
TCGCCTCCGGCGCGTTTCGCATGGATCTTCCAGCGACCGGGCATTGTTTCGGTGGCTA  
AGCCGTGGTCACGCAGGATCGCCAGCCGCTGTAGTCGAATTGCCGCTGTGCATTGC  
GGAACGGATCTGCATGCACCTTGCCGGCATGGATTAGGCCGCTTTCGCGGCTCTGCT  
GCTCCCGAAGCATGGACGCATCCAGACCCGTCCAGCGCTCTTGCGTGA

>CONTIG\_334\_length\_956\_cov\_0.262967

GTCTGCCACCGCTTTCGCTCCACGCTCTACCGAACGCGCCACTCCCGGTCTGTGCT  
GACCACGCAGGTGGCCGGCCAGGCAGAACTCCTGCCAGCCGCCGCGTTGGCGTTGC  
TGGTGTAGCTGCACCGCGCGATCGAAACCGGTAGAAAGCAGAGCATAGAAAAGAG  
GAGGGTGAGAAAGGAAGAGTTAGAAGAAGGAAAGGGGAAGGAAGGGAGCGCGGA  
CACCCGCGCCATCCGCGCCGGCGACTGGCGCGTGGCCGCGCTGCCGGCGGCGCTGC  
AGGACCGCCGCGTCGAGATCACCGGCCCCACCGATCCGAAGATGGTCATCAACGCG  
CTGACTTCCGGCGCCCCGGTGTTCCTTTCTCCTTCTCCTTCTCCCCCTCTCCTCTCCT  
TCTCTCTTCCCCCTTTCTCCCCCTTTTTCTTCTTTCTCCTCCTTCTTTTCTTCTTCT  
TCTTCCCTCTTCTCCTCCCTCCCTCCTCCTCCTCCTCCTTCTTTCTTTTTCTCCCTT  
CTTTCTTTCTTTTCTTTCCCTTCTCCTTTCTCCTTCTCCTTCTCCCCCCCCCTCCT  
TCTTCTTCTTTCTTCTTCTTTTCTTTCCCTTTTCTTCTTCCCCCCCCCTCCCTCTTTCT  
CCTCTCCTTTCTTCTCCCTCTCTCTCTTCCCTCTCTTTTTTCCCCCTTCCCTTCTCCTCC  
CTTTTTTTCTTCCCTCCTCCCTTCTTTCTCTTCTTTCTCCTCCTCTTTTCTTCTTCTCT  
TCCTCCCCCCCCCTCCTCCCTTCTTCTTTTCTCCTTTTCTTCTTTCCCCCTCTCCTC  
TTCTTCTCTTTCTTCCCTTTTTCTTCTCTTTTCTTCTCCCTCCCTTCTTCTTCCCTT  
CTTCTCTCTCCCCCTTCCCTCCCTTCTCCTCCTCCTCTCCCTTCTTTCTCTCTTTT  
TCTCCTTCTCTCCCCCTTT

>CONTIG\_335\_length\_953\_cov\_15.951574

GGCGGCTTCAACTCCGATTGCAACACCAACGGTTGTGAAGTGGCCCAGGCGACCT  
GACTTGAGCGACTTCACCGCCAAGTGGAGTTGCCCATGTCATCCAGCCGCCTGGACC  
AGGCCGAACGATAACGTTTGCATGCGTTATATGAAACCGGGATGTCGATGCGGGCC  
ATCGCCGATGCGTTGGAGCGCGCGCCAGCACGATCAGCCGCGAACTGCGTCGCAA  
CCAGCACGCTCGGCACTATCTGCCAGATCACGCACAGCGCATCAGCGAGCATCGGC  
GCACGCAGGCCAGTCAGCGTCCACGCATCGACGCTGAGCGGATCTGCCAGATCGAG  
GTCCTGCTGAGGGAGGATCTCAGTCCGGAACAGATTGCCGGTCGCACTGGCCTTGCC

AGTCACGAATGGATCTATCGGCACATCTACGCCGACCAGACGCGCGGTGGTCAGTT  
GTTACAGCATCTACGCAAGCGCCGCCGCAAACGCCGTCGGCGGGGCGTGC GCGATG  
GCCGCGGGCAGCTGACGCATCGGCGCAGCTGGACACAGCGCCCAAGCGTGGTGGAG  
CAGCGAAGCCGCATCGGCGACTGGGAGCTGGATACCCTCCGGGCCTCACACGGAAA  
GGCCGTAGTGGTCAGCATGACCGAACGCCGAGTCGCCTGCATCTGCTGGCTTACTC  
GCCTGACGGCACCGCCGAGAACGTGCGCAACGCCATCGTCCAGCGCCTGGGCGGCC  
TAGGCCACACGGTGCACACCCTCACCGCCGACAACGGCAAGGAATTCGCCGATCAT  
CGGCTCATCGCCGCCTGCTTGCAGAGCGATTTCTATTTTGCAGATCCGTACTGCGCAT  
GGCAGCGAGGCAGCAACGAAAATGCCAACGGATTGACGCGCCAGTACTTGCCACGA  
CACATCGATTTTCAGCACCATCACCGATGCGCACCTGCGATGGATCGAACAGC

>CONTIG\_336\_length\_952\_cov\_12.532121

ATGCGGACGAAGTGATCGAGCTTGCCGAGCAGTACGGATACTTCGTCAACGAGAAC  
ACGTTAGAGCCCGAACTATTTGCAGGTGGACTGGCGGAGGACATGCAGGAGGTAAT  
CCGGGAGGAGCTTCCGCGATTGAGGAGAGAACTCTGAATGCATTGCAGCAGTGGG  
TGGACGATCCTGCTCAAATTGATGAAGACTGGCTGCTCAGATTAATCGAGAGGATCG  
GAAAGGGGAGGTTTGC G CAGGCACTTGCGCCGTCGGTGT CAGAGGACGTCTGTCCA  
GCTTACATTTCGTTCCGCTCTGGAGCATATCCGTGATGCCATCGCGTAGTGT CAGCAC  
AGCCTACTTGGCTCAAGCCGTCGAACTGGCTGGGAATCCGGGTCAGTTGGCGGCTTA  
CAACTCTCAGGGACATTGTGTGGTGCTCGCCGGTCCTGGAAGCGGCAAGACGAAGA  
CGCTCGTGCTGAAACTCGCCCGCATCCTGGCGGAAGACGTCGAGTCCCCTCGTGCGC  
CAGCATGCATCACGTATAGCCAAGAATGCGCGCGCGAGCTCACTCGCCGGATTGAA  
GCCCTGGGACTTCGACAAGCACCCAATCTTTTCATTGGTACCGTCCATGGGTTCTGTT  
TGCGCCATCTGTTGATACCGTATGGACGCTTGGCCGGTTTGCCGATACCGTTCCCTCT  
TTCGGTGGCCACCCAACGAGTCAGCGATCGGTTGTTGAAGCAAACCTGGAGACGCAC  
TTTTTGGCCAGAACCACCCGTACAAGGTCATTGACCTCGGGCGGCATCGCCGCTCCG  
TGCTCAATCGAAATAGCGTCGCGTGGCGTAGTGAGGAGGAACTCGCTGCTTGGGCC  
GAGGCTTACGAGGCCGGTCTTCGCGACGAGGGCCTAATTGACTACGATGACATGGT  
GGTCTTCGGTCAGCGCTTGATCGCCGATAACGACTGGGTACTACCTC

>CONTIG\_337\_length\_948\_cov\_12.316687

CGGTTCTGGCAGGGGTCAACGGTAGGGCCATCGGTGCGCTTGCAGTAGCTATCGGTG  
AGCAGGTTTCGAGCAAGGATGAGCTGGAAAGACTGTCCTCCGGCGTGCAGCTGGTC  
AAAGTTCAAACCACTGAGCGCTTGGCACGCTTCAATGTGTTACGGGTATTGTGTGG  
GGTGCACTGTTTTGGTTTGCCAGTGCTCGCGTCTTTTCTCCGACAGTGCCGCCTGAGG  
TGGTTGAGTCGAGCATCTTTCCCCTCATTGCAGCTTCTGTGCTCTTCGCCGTTCTTTTC  
ACTGCCGCAGTGGGCTATGCCACTGCCGTGCGAGTGGTCTATCAGACACTAGATTTT  
GCGCTGATTGAGGTGGGGTGTGCACTTGCAAGCGCGAAAACGCCTAGCTAAGGTTC  
GCTGATTGCACAGCTGCACAATGGTCGCGGCGGAGAGTAGATGGGCCGGAACCAGG  
TTCTCACCTGTGAGACGTCCGAGCGGGAAGATGGGATAGATGCTTACAATGAGCC

GTCAATGGATCATTGGAAAAGGGGGGGGCGATGGATGCGTTGAAGAGTGCCGTGAT  
ACACAGTTTGGAGAAGGAAGCTCATGAGACAACCACCAATATCAGGCATGGCAAGG  
GGCTATTGGATCCCGCCAACGAGATGGTCCTGCGCCTTGCCAGCAAGCTAGCCGAA  
CTGGTTGGCAAGGGAGGGAATGGGGTTCTATGGGGTCAATTTGCCGCCGCCAATCG  
CGAAGGCGAGTTCCCCGGGGCCGTTTCGAGCCTGTATGCAGTCCGAGTTGGACAGCG  
AGTCGTTTCTGGCCCTGTCACACAAAGCCATGAAGGAGTTAAGCGAACAGGCTGAG  
AAGAAGACCGGTGCAACTGGCGGCCACATCTTCTTCGGTCAATTTTCCAGCAATGGT  
GCAGACTTCCTTCTCGTGGCAATGATGAAGAAGAAGGGCGCGA

>CONTIG\_338\_length\_947\_cov\_29.489024

CGGTTCTGGCAGGGGTCAACGGTAGGGCCATCGGTGCGCTTGCAGTAGCTATCGGTG  
AGCAGGTTTCGAGCAAGGATGAGCTGGAAAGACTGTCCTCCGGCGTGCAGCTGGTC  
AAAGTTCAAACCACGGAGCGCTTGGCACGCTTCAATGTGTTACGGGTATTGTGTGG  
GGTGCAGTGT TTTGGTTTGCCGGTGCTCGCGTCTTTTCTCCGACAGTGCCGCCTGAGG  
TGGTTGAGTCGAGCATCTTTCCCCTCATTGCAGCTTCTGTGCTCTTCTCCGTTCTTTTC  
ACTGCCGCAGTGGGCTATGCCACTGCCGTGCGAGTGGTCTATCAGACACTAGATTTT  
GCGCTGATTGAGGTGGGGTGTGCACTTGCAAGCGCGAAAACGCCTAGCGAAGGTTC  
GCTGATTGCACGGCTGCACAATGATCGCTGCGGAGAGTAGATGGGCCGGAACCAGG  
TTCTCACCTGTGAGACGTCCGAGCGGGAAGATGGGATAGATGCTTACAATGAGCC  
GTCGATGGATCATTGGAAAAGGGGGGGGCGATGGATGCGTTGAAGAGTGCCGTGATA  
CACAGTTTGGAGAAGGAAGCTCATGAGACAACCACCAATATCAGGCATGGCAAGGG  
GCTACTGGATCCCGCCAACGAGATGGTCCTGCGCCTTGCCAGCAAGCTAGCCGAAC  
GGTTGGCAAAGGAGGGAATGGGGTCCTATGGGGTCAATTTGCCGCCGCCAATCGCG  
AAGGCGAGTTCCCCGGGGCCGTTTCGAGCCTGTATGCAGTCCGAGTTGGACAGCGAG  
TCGTTTCTGGCCCTGTCACACAAAGCGATGAAGGAGTTAAGCGAACAGGCTGAGAA  
GAAGACCGGTGCAACTGGCGGCCACATCTTCTTCGGTCAATTTTCCAGCAATGGTGC  
AGACTTCCTTCTCGTGGCAATGATGAAGAAGAAGGGCGCGA

>CONTIG\_339\_length\_928\_cov\_71.188514

CCTACACCAATCCTGGCGATGTGTCATGGACAATTGCATGGGCAGCGGAACGACC  
GGCGTAGCTGCGATGAACACGGCGCGCGGATTTCATCGGGATCGAGCGCGACGCCAA  
GTACTTCGAGATTGCACAGCAGCGTATCCACACGGCGCTTGAAGATTGGCTGATGAC  
TGCGTAACATCTCCGTTACGATCCACTAGGCACCCACACGATGACCTCTAACGATGA  
CGGCCTGTTTCTAGACTTCGAGACGGCTAGCACCTGCGACTTGAAGCTGCACGGCCT  
TGGCCGCTATCTCGTCGACCCGACGACGCGGCCATACTGCTTCACCTTTGCGTTGCC  
GAAGATGCGCAGTGCGGATCTATGGGAGTTCGGCCAGCCCATCCCGCGCCAGATAC  
TCGACCACATCGCCGCCGGCCGGCGTTCCGCGCGCACAAATGCGGGCTTCGACTACC  
ACATCTGGAACGGGGCCGCTGCAGCGCTACGTGCAGGGGCTGCCGGAGCTGAAAGCC  
GCACAGGTGCAATGCTCGGCAGCGCGCGCCCGCTACAACGGCCTGCCAGGCTCGCT  
AGCACGGGCTGCAGATGCGATGGGCCTGCCGATCCGAAAGGATCTAGAGGGCGCCC

AGGCGATGAAACAGATCATGACGCATCCGGAATGGACGCCTGCGACGCATCCGGAG  
TTGTTTCGCACGCACCTACAAGTACGCGCTACTAGACACCGACGTGATGATCGCGCTG  
TGGAACGCCACGCAGCCGATGCCCCGAGCAAGAGCAACGCTTCTGGCAGCTTGACCT  
TGAGATCAACACGCGCGGGCTTTGGCTGCGACGTGGAGGCCGCACAGGGCATGTCGG  
AGATGTTTCGATCTCGCGCACAGCATCATCAACTTTGAGTTGGAGATGGCTAGCGACG  
GACAGCTGCTGACCGCGGGCAAGGT

>CONTIG\_340\_length\_928\_cov\_29.254682

GTTCGGTGCTGCAAGCCCTCGGCAACAAGCGGGAGCGTGCTCGGGAGCAGCGTTGG  
GAACACTTCAAGGCCAGCGTGCGCGCGAAGGTGGAGCATCCATTCCGGGTGATCAA  
GCGCCAGTTCGGTTACACCAAGGTCCGCTATCGCGGCCTGGCCAAGAACACCGCAC  
ACGTGCTGACCTTGTTTTCGCGCTGTCCAACCTGTGGATGAAGCGAAAGCAGTTACTGC  
CCGCGATGGGGAGCGTGCGCCTGTAACCCGGGGATTTCCCGCAGAAAGCGCCAGAA  
ATGGCGAAAAGCAGAAGATCCAAACGCGGCTCTCCAGAACAATGCCATATCCCGTA  
CTGTCAGGCTCCTTTGTTTCAGACCTTCCCTAGGCAACCCCTCTTCCGAGTCGGTCCAA  
CTTTGATACAAGATCCTCAGCCCGCAGGTGTGTGTATCGCCGCAACATTTGCATGGA  
TTTGTGACCACTGATCGCAGCAACCTCCTGGTCTGAAAGGCCTGCTTCAACAAGTCG  
ACTGATTGCCTCATGCCGTAGATCATGAAAATGTAGATCCGCCATTCCGGAGTCGCG  
CTTGAGCTTCATCCAAGCTGGATTGAATTGGTAAGAGCGACGTTTACCGTCTCGCCC  
AGGCTCGCCATAGAACAGCAGATCGGTGTGCATAGGACGTACAGGGTTGGCCAACG  
CAGCTCGCAACACTCGCACAGCCTCCTGGGTCAAGGGGACAGTCCGCGAACTTCCA  
TTCTTTGTCTGCTGAAGACGGGGCCACGCGGCGCACCAAGTCAACCTGGCTGCGGCGC  
AGGCCCACCAAGTTCGGAAGCGCGCATTCCCGTTTCCAAGGCTAAGCGTACGATCCA  
ACCGAGCATCGGATTTGAGTGGCCATCTACTGCGCGAAGCAGGCGCTGCTCCTCGTG  
CGGAATCAAGCGGCGATCTCGCC

>CONTIG\_341\_length\_925\_cov\_2.590226

CCCGGCTCCAGGGTGAAGCTGGCCCCGGCATCGGCTTGGTAGCCGTTGGCCACGCTG  
ATGCGCTGCAGGCACGCACCGACGGCAGCGCGCAGGCGTTCGCGTGGGCTAGCCAT  
GGTCGGCCACCCATTGGCTAATGGATTTCGTCTTCGCGCACCCGCTCCGCCAGCACCA  
GTGTTTCGCCGGTCAGCAGTACGCGGCCGCGCTTGGCAGGCTGCACCTCGGCGCGTT  
GCAGCGTCACCAGCGTGTAACCCGTGCTCACCGGTGCCAGGTCGCCACCGAAGTCG  
CGTACATCGCGGTTCGATCTGCACGGTGCACGGCACTGTCTCGGTGGAACCGGGCGC  
CTGGTAGCGCGCGCCATCGGCCAGGCCCCGCTCGGCAAAGGCAGTGAACGCGGCCG  
CATCGAATGCTTGCAGGAACTCGCGCTGGGTTCATGCGCTCACCTTCGCGATCGCGCT  
GCGCAGGGCCTTGTCGAGCTCGCGGTTGAAGTAGAACGGCATCAGCTTGTCCCAGGT  
GCGCTGGGCAAGGCCGAAGATGTCGTAGCGCTGGGTGTAGCTGGCCCCGTGCGGTGA  
ACACGAACACGCTGCGCACCGCGCCGCCAAAGCCCGTGCTGATGCGCTCATAGATG  
CCCGGTGCCAACTTGCCGCGCTGGCGCTTGATCTCGAAATAGCGGCCACCGCGCCGG  
ACAGTGCGCCGCATGACCGCCGTGGTGCCTTGGCGGGTTTTGCCAGGTACTCGGCG

CGGCTGCGCTCGCTGGTCAGCCGCTTGCGCGACTCCTTGCTCACCCATTGATAGGCA  
TCACGCTGCGCCCGCAGCTGCGACAAGATGGTGGTGATGGTGCTGCCGGGCACATT  
GCCGTAGGCATCCAGCTTGGCGCCGCGCCCCGCCACGGCGAACGTGCCGGCCGGCA  
TCAGGCCCTTCTGCTGCAGCA

>CONTIG\_342\_length\_920\_cov\_4.013871

GTGTTCTGGCTTGTGGGCCTTCGCATCCTATTCCCTCTTGACGGCTTCGCCGGCGGGA  
TTAGGATGGGGGTATCACTTGTGCCCCATTGGTCTGGTGTGTCCCGCCAGTCCAGTG  
ATGAAAAAGCCGCCCTTGCCGGGGCGGTTTTTTCGTTTTCGGGGGGTCTACTGCGCT  
AGCAGCAGTCCGCCTCGCGTTGTCATATCGCTGCCAAGTATCGGGCGCGCAGCCCTTA  
AACCGCAAGCAATCCCCGTGTGCACAACCATTGCACACCGCACCTGGCATGCATTTA  
GCCATAGCGCCATCACCTTGCCGGCATGATTCATTGGGGCTATGGATCGACATGGAA  
CGCGTGGTCGGCCGGCGGAATGCGCCGGGAAACAAACATCGGCTCGAACAGCCTGG  
CGCGCGTAATCGTGGGTAGCCGCAGCTGCTGCCGACAGCCGGTGACGACCGGACCA  
GACACGCTAATAAACTCGGTGGACGTGACAGACGACGCGCCGGCATCGCCCGCGAT  
GCAGTCGCTGCCCAGCACCGCCATGCGGGGTTGGTGATACGTCTGTGCAGCCTGGCG  
GCTGCAAAACAGGACATCTTCGCTCACGGCATCGTGGTCCTGGTCGGCCAGGCTGTA  
GTTACCTCGTGGGTGCAGAGCATTTCCCCCTCGACCGCCCAACGCGTGACGACGCG  
GAACCTCTCGACCGTTCCAGCTGCCTCGATCAGCAGACCATTTCATGGCCTTGCGCCC  
GATCTTGCGACACGCCACCTGGTAGCGCTTAGCGGGATATGGGCGGCGGGCGACAA  
CCTCGATGCCGTTGCGCAGCAGCAGGCCGAACGGCGCAATCGCAATATCGATCAGT  
TCGCACCGGGTGGGGATGCCCTGCGGCTCAAGCAGCCGGGGCGCAAGATGGATCAG  
CATGGGATTGCCT

>CONTIG\_343\_length\_908\_cov\_362.010243

TCGCGCTGGCCGGAAGTCATGCGTCTGCAATTGCTCCTTGGTCAGCTCTTCTGAT  
CGGGTGAGCGCACGCTTGATCGTCTCATCGGACAAAGAGCGACCCGCTTCGTCGGT  
GATGTCGGCTGACAGCTCCGCGAGCACTTGGCCCTTCTTGACCAAGGCATTGGGCTT  
TAACGTCGTTGACAGGATGAGGCCAGGCGTTCCACTGCGGATGTCCACTCGCCCATG  
CGTCGAAATGATCTGGCCCCGACACGTGCTCCCGCTTGGAGTAGGACGCGGTCAGAA  
CAAACGTGGCCAGCAAGAGGAAAAGCACACAGCCACAGCCAATCCAAATCCGGAT  
GGACGAGGGAAACGCATCTTTTAGGTGCGCCGAGTGTGGAAGTTGTCTCCGGCCCCCTT  
TCGCTTGCGAAAGAGCGGTTGTTCTGCGTCATCCGTCTGACCTGACTCGCTATCCAT  
AGCACCTACACTTCGAGATCTACTGCACACTTGCGTGAGTTGAGGCTACCCGCGCAG  
ACATTAAAATTACATTTGCATTTTGTGTGATCTGGCGTTGGCATTGGCGCCAAAACCT  
AAGGTTGCAAGCCCCACGCTATTGCTTTTTTCAGCAACCAAGGTTTGCGTCAAGCGAA  
GGTGCGTTGCGCAAAGCGCAGCCGCACATTGCAGAGTCGGAACACGGCGGATAGCG  
CACAAAACGCATCAACATCAACTTAGAGCACGTGCTGCTCCCAATCGTTATCACGCC  
AATCCTAGGCTTCCACCACGTCAGCCACCGCCCCCATCACCGCTGGACGTGTCTGAC

ATCGCCTGCTGTTGAGAGCGAGCGGCCATCGTCATCACGGGGCCTGTTGGATTCTTG  
TCGATCTCTTCGCGCTCCCGCTGGAACCTGCACCATCTCCTGCGCCCGTTGCTGATCCA

>CONTIG\_344\_length\_893\_cov\_19.861619

GCATCGCGCTCCTGAGGCGAACGAAGTTCGATCTGTCGTTGGCCAAGCTCAGGCAC  
GGGAGACGCCTGGGCGTAAGCTTGCACCTGCTCCCGTGCGTGTTGGATGTCTTCACT  
ACTGGTGACCGCTGCTACGCGGATGACGCCGTCCTACCGCGTTGCAGATGGGCAA  
TGGGGCTGTCGAGCTGACGCGCGCCCTGTGCATCGGGATCGAGCGTCAAAGAAGAG  
TTCGACGCATCCAGGCCCCGAGTTTGCACGCGTGGTGTGATGGCCAACTGGATGGCA  
GCAAGGGACTCAGCATTTCGATTGAGGCCATAACCTGCATAGGTTGTACACAGGCTC  
GATAGGTCTAGCTGATCCTGGGTGCGGCGCTGCCACGCGGGGAGCGCTGCCATCGTT  
TGTTTCGTGTTGTTCCAGATGTGGCTGCATGGCAACGCGGGTCGCCGACAGTTCCGCA  
GCGATCGGGCCGTTGCCACCTCGCCGTTATGGCGCCACACACCGTCAGCAAATTGA  
TATTGCTTGCTGTTGGATGCCTGCAAGTTGTCCGGATTGAGCGCGGCAGTGACGGCT  
GACGGCGATTGAATACCAGCGATCGTGTCCAGCCATCCAGGCGGTGCGCGACCTG  
ATATCGAGCGGCAAGGCCCCGCTGGCCCCCTGCACGATATTGCTTTCCACAACCTCGGC  
CGCTTGCGCGTCCAGTTGCGCAGCACGCGCAGGCGGGCGCAACTTCGGCCTGAGTGG  
TGTTGCCGCCATTTGGATCAATGTCGGTAACGCGGGTGCGCTGCCACTGACCAGTAT  
CGGCGTCACGCGTCCAGTTCGCTGGCAACAAGCTTGGTAGATCAGTGCTGCTGGCTT  
CCAAGTTGTATGGGCTACGCGGCGGCGGCATCCGGCTCATCGC

>CONTIG\_345\_length\_887\_cov\_51.925000

CCGAAGGCGATCGTTCCGAGCTGCAGGTACTGGTCGACCCCAATGCGTCCGATGCC  
GAGATTCTGCAGGCCGCATTGACGCAGGCCGAACGCGACCAAGCCTAACCGCTGGC  
GTTGAGCACCAAACAGAAACCCGCCTTTCGGCGGGTTTCTTGTTACGGCCTTGCGCT  
TACGCGTATTCATAGATAAGCAAGACGCCGCGCCCGCCGCGCCCGCCGGGACGCGC  
TATGCCGTTTGCTAAGGTCAATGCGCCGCCGCGCCCGCCGCGCCAGGTACAACCGCGTC  
GGCACCGGGGGTGAAGTGCTAACCGGGAAACCGCCACCACCACCATAGATAGACG  
GGCCGCCCCGCGCCGCTAACGCCCTGCGTTGCGGATAGCAGCAGTGAGTAGCTACCC  
ACCGCACCGGCGCCGTTGACGAGTGACCCGTTATTGGCTAGCTGTGAGCCGCTACCC  
GCGGCCCCAAAGGCCGGAATGTACTGACCAGGGCCCCCGCACCGCCGCGGGCGCC  
GCCAGGTGCGGAAATAGTACCGATCGCAGTCGTGCCACCAGCGCCGCCACCGCCAC  
CAGAAACCCCGTCGCCGCCGAGACCAACCGTTACCGGTATGGACGAAAAGTTAACG  
GTCATCCGGCTGCGGAAGTAAGCACCTGCACCGCCACCGCCACCGCCACTGGCCTGT  
GCCGCGCCAGCCGCCGGCGTGCCGCCGCCGCCGCCGCCGCCGCCACACCCTTCCACC  
ACGATCGACTGCGTGCCCTGCGAAGGTGTGTAGGTTCCCGACGCATCGAAGCGCAG  
CACGTTCAACAGCCGCCCGGTGGTCTGGCTGAACTGCGCCGGCTGCGTGGGGAGCG  
TCGCCAGGCCGACGTTTCGGGCTGAATGCCGAGACGATAGACC

>CONTIG\_346\_length\_886\_cov\_17.806324

TGCTTTGGGCGATCGTCAGAACAGGTCATGCGCCGCGCGACTTTGGCGAGAAAGCA  
CTGTTCGCTGCAGCAACGAAGGGCGATGCAGGAATGGTCAAGTCGATCTTGGAGTT  
CGCCCACAAGACCGCTTATCCGGAGGCAGGCTTGTTTGCTGCACTCCAAAATGGCCA  
TGATGAAGTGGCGGATGTTCTGGTTCGCCGAGTGAAGTTAGATCACGTGCGGGACCT  
GATCACAGACGAAGCGATTGAAGCGAAGCTTGATGAGGCGATTGCCAGAGTTGATG  
CAACCGAGCAGCACAGAGAGCTTCAATCCAACGAGCGCAAGAGAGTTGCGCAGAG  
CAATACGTCAAGTTCAATAGAGAAGCACCCGGCACGCGGCGCACGCTTGTAAGCGA  
GTGCTGTAGAAATAGGCCTGGATGTCATCGGCATCCTCACTCCGTTGCTTGCTTCTA  
AGGACCTGCTCTCCGTATCTCCCAATCGCCACGCGATAGGGTTCGGACCTGATGAAG  
GTCAGTGTCGTAGATGGCGATCAGGTCAGAGCTGCTGGCAATAATGTGACCTCGCAT  
CTTGCGCTCACCCTTTTCCAGAGTTCTGAATCGCTTCGCGATACAGGACCAAGAAG  
GCGATGCTTTTCTGTGGTTGCCTCATCTTTACCAGCATGCTCGCCAAGCAAACCCTGG  
CGGGATCGCTACGAACAGACCGACGAGAAATATTGTCAGTGCGAGATAAACTCCCG  
AGGCAGCGATGCTGGCCGATGAGGAAATAAGCTTAATCCATGGATGTGCGCAGGAAA  
AATTCTTAATTTCGACCTTCGCCAACTGGTTCGAGTGGGCAACCGGTAGATCAAACT  
GCGATCCACACAAAAACAAAGGCTGTTGCTACGGAAAC

>CONTIG\_347\_length\_877\_cov\_4.732000

TCTTCATTGCCCTCAAGACCTTTGCCGGCGGATCGGACTACGTGTTGCCGTCGCGAT  
ACGACTCGGACTTGCCCATGAGTAGCGCCACGCTTAACCAGGTGCTGACGCTGACAT  
ATCGGCTGGCGCAGAAGGAAGAGAAGTCACTCGCCAAGTTCGGGCCACATGACTTG  
CGGCGCACTGCAAGCACGCTGCTACATGAGGCCGGCTATAACACGGACTGGATTGA  
GAAATGCCTGGCGCACGAACAGCGAGGCGTCAGGGCTGTCTACAACAAGGCCGAGT  
ACCGTGAGCAGCGGACGGCGATGTTGCAGGACTGGGCGGACATGATTGACGAATGG  
ACACTGAAGCGATCGAAGGCGTAAGCCAGAGGATGACAGTTCGCTCACCTGCCCCA  
ACGTCGAGGCTTAGCACCCCTGGATAGGGGCGCCAGCGCCCCCTATCCCACCGGCAC  
TGCGCCAACCAACCGCGCGGCCTAATCAAGCCCCAGGCGCAGTGCCGGCGGCTCCCT  
CACCGCAAAAGCAGGTCAGCAGGGAGTGATGTGGCAAGCGTGGCGACGACAAGGC  
CCTGGCCAGGCCGAGGGTATCGATCAACGCGCAGTGGTAGAGCGGTTCATCGTGCGC  
TACGCGCACAGCAGCGCGGCCGCCGTCACTTCACCCGGTGGATCAATCCGCTGCGA  
CAGATCACATAGGCCCGGTGCGATGGAAACACCGTGAGCTTGCGAATCGACTTCTTG  
CGCGGTGTTGCGTTGTCCAGCCCGATGGCCACGGTCCATCTGCCGTTGCTCACCACC  
AGGTCAATCACGCCCTGCCGATGTCTTCCAGCTGCATGGGCACCTCCCAAGCGACA  
TGCCATGTCCGCCGCCAGCACAGCTGTCATAGC

>CONTIG\_348\_length\_869\_cov\_14.942049

ACAACGCACCGGTGGAGAGCTTCTTCGGCCTGCTCAAACGCGAGCGGATCAGGCGG  
CGGATCTATCCCACCAAGAACGCCGCACGCGCCGAGGTATTCGACTACATCGAGAT  
GTTTTTACAACCCCAACCGTCGCCACGGTTCAACTGGCGACCTGTCCCCTGTAGAGT  
TTGAATGGCGCTACGCGCAACGAGGGTCTGAGTGTCTACGGAAACCTGGGCGTAT

CAAACGCTCACAAGAAATGGCGACGTTTCAGGACTCAACACCCGCAGTGCTGACATC  
GCTACGTCCAAGTGATTGAGATTGATACGCAACTCTAAGAGCTCTTCAACCCGTCGC  
CATGCCCCGTGCGTTGCGGGGCGACGCCCCCGGCTTGTCCACGGGGCCAACGGCCGC  
CGTTGACCAAGTGCTGCAGTCCACCTGGTCAACGACGCGGCGAGGTGCTAGCCCTC  
GGTCAGGCCAACAGCTGCTTGATGGAGGCACTGAAAAATCATGCTCGGCATTGCCG  
TCGAGGCTTGGCTGATCAAGAGCGGCTAACAAAAAACCTTGAGTACTGTCTCGTCGG  
CGACAAATTACGGACATGACACGTTGCGACGAAGTCCCAATTGCGCTCATGATGGA  
GATTGCCTCAGGTGTTGAACTGACAAGGAATTGGACTTCAAGCTGATGCACCGCTC  
AAAATCGGGAACGTTGCGACACGGCATTAAAATCAATATAAATAATATTTATTAGTT  
TTTATAAAAGTCTCATATCAAGACATCCAACCACTATCATACACATGCCCTCTTAATT  
TTCCAGGTGCATTAAATGCACTTATGACGGATGCCACAAAAAACGCATAATTCCGC  
ACAATTACATCACAAGCCATC

>CONTIG\_349\_length\_864\_cov\_21.466757

TGCCAAGACGTCGAAGATGTCCCGGCTTGCCTCTTCGGATCTTCGGGATCTCGA  
GAAAATCTTAACGCTGTGGTCAAGCAACAACGCGCCTTGATTTGGCGGAGAGAGTG  
GGATCGGATCACCTTCGATCCAACCCCTTCAAACCGTTGCAGAAAGCCTGCTGGGCA  
GGTTTCCTTTCAATGTTTCCTCGATCATAGCCTCCGCATCGGCACGATTGCTAGCGCC  
CGCTTGCCATGGACGAGTTGCTGACGCCATTGTCTGTCTGCATAAAATCGGACCTCA  
CAGACATGAGCAACTCAAACAGCCCGCATGAAGCACGTGTCGCGGTGTTGGTCGAC  
TGCGACAACGTGCCAACCGACATCGTCGAGCACGCGTTGCTCATGGTGGCGCAGTTC  
GGCCGGGTTGTGCTTCGTCGCGGGTATGGCAACCACAACACCCTCGCCAACAAGTG  
GCAGGAAGTCCTGGTCCGCCAGGCGTTACCCCGTGCCTTCAATACCAATACGCCTC  
GGGCAAAAACACCGCCGATATCGCATTGGCGCTCGACGCTTTGGAGGCACTGTTCG  
ACAGCCGGGCCGACACCTTCTGCCTGGTCACCAGCGACTCGGACTTTTCTACCTCT  
GCCGCAAGCTCCGCGAGCGCGGCCACGGTTTTTCATTGTGGGCGAGCCCAAGACC  
CCGGATGCCTTGCGCAACGCCTGCGACCAAGTTCTTCGAATGGGACCGGACGGCCAA  
GGAGGTGGCCGCACCCGAAGTCCAGGGCAATGAACTGCCTGTCCTGAAATCGGAAG  
CGACGAAAGAAGAAGCCCCTCGCGTAGAAACCAAGCCACTGCCGAAACGGCGTCCC  
CGGTTCTTGGTCGAAG

>CONTIG\_350\_length\_861\_cov\_145.036785

AAAACGGATTCCCGGCTTTTAGGCGATCAACGGCGAGGTGAAATCTCGCCGCGATCT  
TCCAACCAGGTGCGGACCATTTCCGCCGGCGAGCTTGCTCAACGCGTACACCGCAACC  
AGGCCAACCAGCCACGGTGCAGCCATGTCGGCCATCTGCTCGGTGTACGCGCTCGC  
GTGCGGATCGTTCAGCACGAACAGCAGCATGGCGAACAGAAAGTACAGCGTAAACA  
CAACGCCGAAGCCGACCAGGCCAGCGCGTGACAAGCCACGCAAAAGCGGCAGCAG  
CTGAGCGTGCGAGAAACGTATTCATGGCGGAACTCCATCGAAGGACGGACAAACTCT  
AGCACTGCTGTCGAGCTACTTTGGCCAGCCTCGCTATAATGGAGCGCGAGTTGATC  
GTCAAGCGCACCCGTGCCGGACTGGAAATGGCCACCAGCTTGGCCGCAGAGTCGG

CCGCAAGCACCTACACCAAGGACCAATGGGTGACTGCGTGGAATTGGCCGTTATGT  
GCGCTGGCGGCCTCGCCGCGAGAGTGCTTGCAGCGCAGCCTTGAATGATCGAACAT  
CAAACATCATTGTTTGATAGATCGATCATGACATCGCCATTTCCATCACACCTTG  
GCCGAGCTGGCCAGTGCCGGCGTGCTGCGCACCGTGACGCTGGTTCGGCCAGGTCGG  
CGGCTACACCGTGATGGTGCGGGTTGGCCAAACCGAAAAGCAACTGACCGGCCAGC  
GTGGCGAGCCACGCGTGTTTGCCTCGCTCGACACCGCCGCCACCCAGCTGCTGGCGC  
TCGGGGTGACGGTGTTTCGAGGTGTTGCCGGCCAACTACGTGCGCGCGCCCAAGGTCT  
ACCGACGCGGCCGCCC

>CONTIG\_351\_length\_859\_cov\_0.935792

CGGTCTGTGATTCCCTCGGCTCGGCAGTCCAGCCACATCGTCGCGGCCGAGGCAATGA  
CGTTGGTACCACCTGGCTCGACGTTGATCCGCCCCGACCGTCGTCACGCAACCCTCGC  
GTTCTGCTGCCTCCCGGGCTGCCAGTATGGTCTGCGCCATCGGGACGACCGGGTCAT  
GACGATCGGGTATGAGGGTCGTTCCGGCGTGTTTCCCTGGCCGGTGAACCTCGGCAC  
GCCAACGTCCATGTGGTCGTACCGCGGTGGCAATTGCGACCGGGTGTCCCACATCCG  
CCAGACCTCGCCCTTGCTCAACGTGCAATTCAACAAAGCAGGATGCCTCAAGCAGA  
ACGTGCTCGGGACCCATGAGATCGGGGTTCAAGCCGGCCTCTCGCCACGCGTCCGG  
CAAGGACTGCCCATCTCGAGCGACGAGCGTGTGGGCCTCAGCTTTGCTGAGCTTGCC  
CGACGCCAGCCGCGACCCCAAACAGGGCATTCCGAACCGGGCGCCCTCTTCGTCAG  
CCATGGCGACGACTGCGAAAGGTTTCGCCGGCATGATCCCGGCTTCTTGCATCTTCG  
CCACAGCCACCAATGACGAGACGACGCCGAGAGGCCCGTCGTAGGCTCCACCGCCG  
GGCACAGAATCCAGGTGGGACCCCGTCAGGACGGCGTCGGGACCCGGAGTTCCCCA  
CCACGCCCAGATGTTAGCGTTCGCGTCCGTGACGATCGCCAGCCCCAACTCGGTGGC  
CTTTGCGACGAACCATTCCCGCAGCGCCACCTCCTCGGGACGTAGGCCAAAACCGCG  
AATAAGAGCCGTCTCTGTTGCGTCCAATCGCGGCGATTTCAGCCAGCAGACTGGCA  
GCAGTCCAGGT

>CONTIG\_352\_length\_857\_cov\_2.953425

ATCGATTGCAATACGCACGTTTCATCTTGCCGAGCATATTGGTGGTGAACACTTGGAT  
ACCGACCATGGCGGCATCGGCGTTGAAGGACGCCCCGGCTGGGATACAGCGTGGCAT  
TGACCTTTGCAGCCACGGAAACTGTGCTGAGTCCAGTGCTTAGAACCGCCCTACTTA  
ACTTACGGCGCGCACGGTCGCTGCATCCTTGATGTCGAACACCATCGGTGTCCGCAA  
GTTGTGCTGTTTGAAGTAAAGTAAATAGCTCATCAACACGCGGCACGTGATACCCGGT  
GGTCGTGCGGCGGTTCGGGGGTCAGGAGGTAAAGCTAACTAACCTGCGACCAAGGGG  
TGACGGTGATCGACGGATTGACACCCTGTTTGTGAGGGGGTTGTATTTGACGCCCCG  
GATGCTGCGTCCAGACATTGGTCGTGCGGCCAAGATTGTAGTCATGCAACAGCACCG  
GGACGCCGTGCTGGTGAGCTTGACGTCCAACCTCGATGCCGTCCATACATTGGTCGT  
TCGCGACCTGTAACGAGCCACGCGAGTTTTCCGGAAGATCGTTGATGCCGGCGGATT  
TGCCCCACAAACCTCGGTGAGCTAGCACGGTGGTGTTGGGACCGTTGAAAACAATG  
CGGCGCCATTTGGTGTCTAACGTGTGCTACAGGAAGCCAGAGCAACCCGGGGCAC

AACCGCGAGCAATGTCAGTGCGCCAAGAGCGTGACAGACGCGAACGAGCGGGGTG  
GTAACACGGTGAGTGGTCATGGATCTCTATCCAGGTTATGAGTGCGGAGGACGATG  
AGAGGACGAGTTCCAACCGGTCGACACGGCTGTGGGTTCGCCTGTAGCGCACTTGCT  
CGACGGACC

>CONTIG\_353\_length\_841\_cov\_28.165266

ACCATCCAGGACGTCACCATCAAAGGCATCTCGATGTTTCCTCACCTCGATGGGTCTT  
GCGCCATTGTCAGCTCTGGCTGACACGCCCAGTCCAGCGGCGACGAATAGCGCAT  
GCGAGCATGCAAAGTGACTTGATGTTTAGTTGCAAGCATGCTTGATGCTAGAGTG  
CGCGCAATCTAGCATGCGTGATGTTTGAGCTTTGCATGCAAGCCTGCAAAGCCAA  
ATGCATGCACGCATGCACGCCAGCTTGATGCTATCTCGCACGGTGATGCAAGTCT  
GCAAAGTCTAAAGCAGCTTGATGCAAGTTGCGCTCTGGACGCACTTCGATCAGCTG  
CATGCAAAGCATCAAGCATGCGTGATGCAAGGTATGACGATGGGTGCCAGGTCAT  
TGAAGCCTTCGCCAAGGGCTGGACAAACCGGCGGATTCTGGCCGGCAAGCCGCGAC  
TGGTTGGCCGCTGGGTGATCGGCGAAGACGGCACCCGTCGCCGGCTACTGAGCTTC  
GCACCAGGCGACCGGTTTGCACTCGATCTATGGGAGCAGAACGACTACGGCACAAC  
GCGATGGCGGGTTGTGCTGTGTGAGGCATTACCGGCCGGCCAGGCGGGCGAAAGCG  
TGCCGGCAGTGCGCCCGATGTCGCCATTCTGGCCGACATCACAGGCGCAACGCGG  
GTGCGCGCTTATGTGGCCTGGTTAGCCCTCAATCGGTCAAAAATTGACACCCTAAAT  
CGGCTAGAATTGGCGCGTATCGAACAGTTTTTCCAGCGCATGCCACTGGCGCGGTTG  
AAGGTTTTTAACCGCCGACGTGAGAGCCAAACTCCCCCGCAAAGGGCGAGG

>CONTIG\_354\_length\_841\_cov\_16.760504

ACCATCCAGGACGTCACCATCAAAGGCATCTCGATGTTTCCTCACCTCGATGGGTCTT  
GCGCCATTGTCAGCTCTGGCTGACACGCCCAGTCCAGCGGCGACGAATAGCGCAT  
GCGAGCATGCAAAGCGGCTTGATGTTTAGCTGCAAGCATGCTTGATGCTAGAGTG  
CGCGCAATCTCGCATGCGTGATGTTTGAGCTTTGCATGCAGGCCTGCAAGACCAA  
ATGCATGCGCGCATGCACGCCAGCTTGATGCTATCTCGCACGGTGATGCAAGTCT  
GCAAAGTCTAAAGCAGCTTGATGCAAGTTGCGCTCAGGGCGCACTTCGATCAGCTG  
CATGCAAAGCATCAAGCATGCGTGATGCAAGGTATGACGATGGGTGCCAGGTCAT  
TGAAGCCTTCGCCAAGGGCAGGACAAACCGGCGGATTCTGACCGGCAAGCCGCGCC  
AGGTTGGCCGCTGGGTGATCGGCGAAGACGGCACCCGTCGCCGGCTTCTGAGCTTC  
GCACCTGGTGACCGGTTTGCACTCGATCTATGGGAGCAGAAATGACTACGGCACAAC  
GCGATGGCGGGTTGTGCTGTGTGAGGCATTACCGGCAGGCCAGGCGGGCGAAAGCG  
TGCCGGCAGTGCGCCCGATGTCGCCATTCTGGCAGACATCACAGGCGCAACGCGG  
GTGCGCGCTTATGTGGCCTGGTTAGCCCTCAATCGGCCAAAAATTGACACCCTAAAT  
CGGCTAGAATTGGCGCGTATCGAACAGTTTTTCCAGCGCATGCCACTGGCGCGGTTG  
AAGGTTTTTAACCGCCGACGTGAGAGCCAAACTCCCCCGCAAAGGGCGAGG

>CONTIG\_355\_length\_838\_cov\_0.084388

GGGAGAAGAGGAGGAGAGAAGAGGGAAAGAGAGAAAAAAGAAAAGAAGAGGAA  
AGGGAAGAAAGAGGAAGAGGAGGAGGAAGGAAGAAGAAAAGGAAGAGGAAGGGG  
AGAGAGGAGAGGAGAAGAGGAAGGGGAAAGAGAGGGAGGGAAGGGGAGGGGGGG  
AGGAGAGGAAGAGGAGAAGGAGAAGAAGGAAAAAGAGGGGAAAGAAGAGAAGGA  
AGAAGGGGAGGAAAGAGAGAGAGAGGAGAGGGAGAGAGAAAGAGAAAGAAGAGGAG  
GAGGAAAGAGGAGGAAGAGGAAAGAAAAGAAAGGGAAAGGGAGGAGGAGGAGGG  
GAGAAGGAAAAGGAGGAGGAGGGGGGTTGAGGAAGGTAGGAGGGAGGAAAGAGT  
AGGAGGAGGAGAAGAGGAAGGGAGAGAAAGGAGAAGGAGAAAAAAGAAGGGAGA  
AGAAAAGGGGAGGGGGGAGAAAGAAAGAGGGAAAGGAGGAGGGAAAAAAAAGGAA  
AAAAAAGGAGGAAAAGGAGAGAGGGAAAGAAAGAAAGGGGAAGAAAGGGAAAA  
GAAAGAAGAGGGAAGGAGGGAAGGGGGAAGGAAAAGAAGAGAGGGAGAGGAGAA  
AAGGGAGAAGAGGGGAGGAAGGGAGGAAGAGGGGAAGGGAAAAGGGAAGGAGAG  
GAGGAAGGAAGGAGGGAGAAAAAGGGAAAGAGGAAGGGGAGAAAGGAAGAGGAG  
GGAGGGGAAGAAAGGGGAAAAAGAAAGGAAGGGAGGGGGAAAGGGAAAGAAGAG  
GGAGGAAAAGGGGAAGAAGCGGCCACTCGCTATGACACGGCGGAGCTGGAGGCCA  
GAGGGGACATCTGGGGGCTCTTAGCTC

>CONTIG\_356\_length\_836\_cov\_1.344147

GCCTTGCCGTAACGAGATGAGGGCAGCGGCTTCGCATGGGGCTGTTGTCGGTTTGGG  
CTATCGCTTTGAATGGCGCGCTGGCTGAGATGGCGCAGGGGCTTTTATCGCTTGCTT  
TGAATCGCTTGCTGCTCCGGTATCAGTCACGGCCGCCATCCAGTCAGCAGTCCGGCA  
ACTCAAGAGCAGCACTCAAGCATTTTCAGATCCCAGAAACCAGAAGACCCCCGATC  
GCTCGGAGGTCTTTTTAACTGGTGCCCAGAAGAGGACTCGAACCTCCACGAAGTTG  
CCCCCGCTAGCACCTGAAGCTAGTGCGTCTACCAATTCCGCCACCTGGGCAAGGTGA  
GCCGCGAATTTTGCAGGCTCCTGGCGGGATTGTCAACGGGTGAACGCTGCGATCTAC  
GCCTGGACGGGCGGGCTTTCAGCCCACATCACGGCTGCACGGGGTAATATGGTGGC  
AATGACCAAGAAAAACACCCAGATTCCGATCGGCCGAGTCGACGCAATTCCGCCA  
ACACTGGCGAGCCCACCGCCGAAAAACAGAAGTTGCCGGGGTGGATGCCTGAC  
TTCCTGGTTTCGCGCCGCGCTGGCGCCTCGACCAAGTCCGCAAACAAGCGCGCTGCC  
GATAAAGCCGCGCAAGCCTTGCCGGAGCTGCAAGTAGCGCCGCGCTGCCTGAGCC  
GCCGGCTCCGCGCGCACCGCATCCGCGCAAGAGCGGCCCGCTGCGCCGCGCGCGG  
AACGCCTGCAGTCCGTCCAGCCTGCAGCTGTCACTGCTTCTCCCGCTGCCGCCGCTG  
AGTTCAAGGATCCGCACGCCGATCGCGAAGCGCTGCGCTATGCC

>CONTIG\_357\_length\_836\_cov\_0.901269

CTTGCAGACATAACAAGCAGAGTGTTTCTAAACTGCTCTAAGAAAAGAAAGGTTGA  
ACTCTGTGAGTTGAAGGCACACATCACAAAGTAGTTTCTGAGAATGATTCTGTCTAG  
TTTTTATTTGAAGATATTTCTTTTCTACTGTTGGCATCAAATCGCTTGAAATCTCCA  
CTTGCAAACCTCCACAAAAAGAGTGTTTCAAATCTGCTCTGTGCAAAGGGACGTTCCA  
CTCTGTGAGTTGAATACACACAGCACAAAGAAGTTACTGAGAATTCTTCTGTCTAGC

ATGAAATGAAGAAATCCCGTTTCCAACGAAGGCCTCAATGCGGTCCATATATCCACT  
TGCAGACTTTACAAACAGAGTGTTTCCAAACTGCTCTATGAAAAGAAAGGTTAAACT  
ATGTGAGTTGAACGCACACATCACAAAGAATTTTCTGAGAATGATTCTGTCTAGTTT  
TTATTTGAAGATATTTCCCTTTGTACTGTTGGCATCAAATGGCTAGAAATCTCCACTT  
GCAAATTCCACAAAAAGAGTGTTTCAAATCTGCTCTGTCTAAAGGGACGTTCCACTC  
TCTGAGTTGAATGCACACAACACAAAGAATTTACTGAGAATTCTTCCGTCTAGCATT  
CAATGAAGAAATCCCGTTTCCAACGGAGGCCTCAAACAGGTCCATATATCCAATTGC  
AGACTTTACAAACAGTGTTTCCAAACTCCTCTATGAATAGAAAGGTGAAACTCTG  
TGAGTTGAACGCACACATCACAAAGCACTTTCTGAGAATGATTCTGTCTGGTTATTA  
TACGAAGATATTTCTTTTCTGCAATTGTCCTCAAAT

>CONTIG\_358\_length\_831\_cov\_0.191761

TTCTTCCCTCTTTCTCTCTCCCCCCCCTTCCCCCTTTTTTCTTTCTCTCTCCCTCT  
TCCTTTTTCTTTTTCTCTCTCCCCCTTCTTCTCCCTCTTTTTCTTCCCTTTCTTTTCCCT  
TCTTTCCCTTCCCTCTCCCCCTCTCTCCTTTTCCCCCTCTCTCTTTCTTCTCCCTTCCTCTT  
CCTTCTCTCTCCTTCCCTCTCCTCCTCCCCCCCCTCCTCTTTTTCTCCTCCCCCTTCCT  
CTCCTCCTTTCTCTCCCTCTCCTTCTCTCCTCTTTCTGTCTGCACCGTCGGTGTAGTTGC  
TGCCGTAACCCGCAGTGAGGTCGCTTCCTTTTCTTTCTTTCTTTTCTTCTCTCTTTCTT  
TCTTCTTTCTTCTTTTCTTTTCTCTCCTCTCTTCTTCTTCCCTCTCCTTTTTTCCCTCC  
TCCTCCCTCCTTTCTTCTTCTTTCTCTTTTCTCCTTCTCCCCCTTCCCTCTTCCCCCT  
CCTTTTTCTCTCCTTTCTCTCTTCTCCTCCTCCCCCTCCCCCTTCTCCTCTCTCTCTTCT  
TCTCTCCCTTTCTCTTCTCTCTTTCCCTCTCTCTTCTCCCTCTCTTCTTCTCCTTTTCT  
CCTCCCCCCCCTCCTCCTCCTCCTTTTCTTTTCTTTCTTCTTCCCCCTCCCCCTTCTCTTCTT  
CCTCCTCTCTCCCCCTCCTCCTCCTTCTCTCTTCTCTCTTCTTCCCCCTCCTCCCCCTTTCC  
CTCCCTCTTCTTCTTCCCCCTCCCCCTCTCTTTCTTCTTTCTCTCTTTTCCCCCCCCTTCCC  
CCCTCCCCCTCTCTCCCTTTCTCTTCTCCCCCTCTTCTCCTCTTCTCCTCCTCC

>CONTIG\_359\_length\_829\_cov\_19.773504

CACTGGCCGGGATGCGCAGCATGCCTTCGTGTTACGCGCACGGGCCACGATCAGCT  
CAAAGGCTGCTTGCTGACCGAGCCGATCTTTCACACCGACCAGCGCTTCACGCGGAA  
GCCCCCTCAATCGAAGTGACGTTTGGATTGGCAAGAATGCGAGGCACTTCAATTTTCG  
CAAAGACGCGGCTTGGCTGAGCGTCGCCCACGATGGCATGAACTTCACCTACGGTT  
GCATCGGCAAACCGTCCCGATGCATCTGCCCAAGGACCTTGCGTAGGGTGGTAGAG  
CCACTCTGTGGCAGGCCCCCGATGAGACCCCTCTATCAGCTCACGAGGCGAAATTTCT  
ATAGATGTCGGCGAGCGCGGTATAGAAGTTCGCGGGAATTAAGAAATTTTCGATGCCT  
GACTTTTATCGATAACGCGGATGTCTTACCAGAATCGATCATCGATCCAATGACAT  
CAGTCGACCAGATGTCTTTCGCTGCTGGGCCACTGTAGAGAACAGTGACCTTGCCGG  
AGGCATTTCGATCCACCTGCGCGGGCGAGCGACCTCAGCGATTCTGGTGTCTGGTAAT  
CGCCAGGGTTCTGACGAATTCTATCGATTGCGTCCTGGGTAGATATCGAGCCATTCA  
CACCAGGCACCCCTCATCGATTTCAAAAACGATGTGGTAGTCCGTGTTTCTGGAGTG

GACGCCGAAATCCTTGTATGCGAGCAAGGCCTCTTTGAGGTCAGCTATGAATTGCTC  
CTTGTACGCCTTGAGATGCTCAGGCAGTCCATCTCCACCATTGATCCACATCAGTCT  
CCAATGGGACCAACCGGGCTGACCTCGCGCGCCT

>CONTIG\_360\_length\_815\_cov\_45.827035

CCATGTGGGTTCGTTGCTCTCGCTGCCAGGCGCGCCGCTCGCTTAAGTACGCGCCTG  
ACACTTACCAGCGCCTGCCGTGCTGCCGGACCTACGGATGTACGGCCGCGCGCCTGC  
GCACCGGCAAGCGACAGTCCTACTACGTAGACCACTACCGGCAGCACGTGAGCGC  
AACCACGGCGCGAAGGCCACGGTGTGCCGGTGCCACGCCTATTACTTCCCACACCG  
CCAAGCATCTGGTAGTTGCCAGTGGCGCGTTCTTTCTAGGAGTTACAGACATGACC  
ACGAGAATTAACGTAGCACAGGGCAAATACACCATCGCCACGAGCACGGCGTTAA  
CCTGCGAGTACTACGGTACGGCGAAGAGTGGCGAGACGCCATAGGAGACGGATTCA  
TCCTCAGCTGCGCGCAGGAAATCGAAAATCTAGTGGATGCTTTGCGCGGTTTGGATG  
CGGCTTATTGCCGTGCAGGGCCTGACTTGAACGCCACCGAGCGCGCTGAAGACCGG  
CAACGGCTGATTGAAGCGCGCCGCGCGATCGCAGCTGTAATGGGTGGCCAAGTATG  
AACATCGACGCGCTCAAGCGCCAGGCCAAGTTGCTTGCCCGGCAGTTCGGCCGCAC  
GCACTCCGAAGCCCTCGACGAGTTGGCCCGTCAGCGGGGCTACTCGAACTGGTCCC  
ACCTTATGAAAGCCACCGGACACAAGTCATGAAACTCGCAGACCTTAACATAGCAA  
TTGTGCTGGGCCCTGTGCTTACTAACCAAGCGGTTAGCGAGAGCGTCTCCGGCCTCT  
GGGTTAGCGTCCAAACCGCTCAAGCC

>CONTIG\_361\_length\_813\_cov\_0.549563

GGTGCGTCACCCATGGCCAGGCCACCGGAAACCGCACTGCGCCGCTTCGCATCTGCT  
TTCATGCCGCGCGGTGGTTGATGGCGTGCATGCCTCCGTTGCGTTTGCCCTGCAGG  
AGTGCGGCGCACCGGGGTGGCTAGGCTTGCGATTACTTCTTTCGGTATAACCCGCCG  
AAGGAAACGTTTATTCCGCCGCAATCCAGGTTGTGTCGTCGGCCAGCAGCATGTCGCCA  
AGTAATTGCAGACGCACCTTGACAGTGTCTCGTTGACCTCGACGCGGTTGCCTTCT  
GGATAGCCGCGCGCGGTGACCGAGCCGGTGTGCGGACCGCCCGGCGTCTGTTCCGG  
GTCGGGATAGGCGCTGGGCCAGTACGCATCGCCGTTGACGGTGATGCTGCCGTCTGC  
GTTGGGGGTCAATTGCAGCATGTTGTGCGCGTAGTGCCAGTGGCCGTTCCACGCCTG  
CGGTGTGGGCGTGGCCGCGCTTGGGTGCAGCTGCAGGCTGGACTGTGCGACCCAAC  
CAGCATTCCCGCCTCCCTTGTTGGGATAGCTCCTTCCTTCTTTCTCCTTTTCTCTTTCT  
TTTTCTTCTTCTCTCTCCTTTTCTCTTCCCTTCCTTCCTTTTCTCTTCCCTCCTCCCTCC  
CCCTCCCCCCTCTCTCTCTCCTCCCCCCTCTTTCCCTCTCCTTCTTCTCTCTCCTC  
CTCCTCCCCTTCTCTTTTCTCCTTTTCCCTCCCCCCTCTCTTCTTTCTCCTCCCCC  
CTCCCTTTCCCCTCTCCCTCCCTTTCTCTTCTCCCCCTCTCCTCTCCCCCTCTCCCTCTC  
TC

>CONTIG\_362\_length\_810\_cov\_20.998536

CAATCACCGCGTGGGGGCCGCTGGGCAGGTTCTCGATGGCTTCCACGGTGCCCTGAA  
AGCGGCGGGCCACATCGAGATTGACCGGCTGGCCGTACTTGGACGCTAGCCGTTTCT  
GTGCATCGGCCAGTTCCATGCCCCGCATGTCTTCGTCAAAGCCGGCCTTGAGGCGCA  
CGCCCGCAGGAGTGCGCTCGGCCATCCGCAGTGCGACCAGGCGGTTCGGTGCGCGCT  
TCCAGCGCTTCCAGGAACCTGCGCTTGCGTGCGGGTGCGGCTGGTAGCGCCCTTCATC  
TGCTCAAGGCGCCCAGCGGCCAGCTGGTCGTCCAGGAACGTGCGTGCAATGACCTG  
GCTCTGCTGAGGCAGCGGCCCTTCCCAAGCACGTCCAGGCGCACAAAGGCGCGCT  
TGGGGTCGCTGAGGGTGGGATCGGCGTTGACCTGCTCCACCAGGTTCGGCCGGCACC  
TGGAAGGTGCCGTCCTCCAACCTTGGTCACATGGCCTCGGTGCGCCAAGGCGTCCATA  
CGCCGCACGTGCGCCTCGATGTAGGACTCTGGCGTTGCGTTGCCGGGCAGACGTTTC  
GGGTCCCATTCCTTGACCTCTTCCAGGTGCGCCTCCGGGGAATAGATCTCATCCTTC  
AACCGCCGCAGCACGTTTTTGTCTGCCGCCGTGGCGACCGGCGGCGTGTAGCTGTGC  
AGAGTCACGGTGTACCGATTTGCCCGCGTTTCGACCAGGTGCCGCTCCGACGGGGC  
ACTGAGCGTTGCGTAATGCACCTGGCCGTCGAAGCCGGCGACGACGACGTATTCGG  
CGCCCGATCGCTTGTCGG

>CONTIG\_363\_length\_800\_cov\_4.539376

GGTCTTACACAGCGGAGACGATAACCCAGCAATTCTACCAATTACTACTCAGCCTGGT  
CGCCAAAGGTGCCGCGCGCATCCCGTGACGCCCTCACGAGTGCCGCTGAAGCATCA  
GCGCGCTCCTCCGAAATGCGGTTTCAGGACCGAGCCCCGTTGCCAGGCCAGATTGTA  
GTCAGCGAGCGCACCGATCCGCGTCGGCACCAAGGCCAAACGGTCCTTCCACGCGA  
GTGTCTTACCAGCCCTTGCTGGTAGGCGTGGTCGGAGATGAGACTCCAGGGCGGCT  
CCAGGTAGGTGCAGCCAGCTCGGCGCCGACGCCCAGCAAGGTGGTCAGCACACAC  
CGGCGAAGATGCGATCCCGATGCCTATCGACGCCATCCTCCAGGCCGGCGTAGCCG  
GCCGGATCGGTGAGCGACACAGAGCAGCTTCAAACAATCAATAACGCATCACCCT  
GGATGCTATGTCGATATATCAAGATTCCGAATCAAGCATGACATGGTTGAATTTCTC  
TACGTTTAACTAGGCCTTGAGCAAGCCAGCGCGCCCTGTGAAACCGTGGCGATATCA  
GACCATATCGAAACGGTCTTGATGGACTTGCTGCCCCCATAACGCTGGCACCGTGAG  
CGCCGATATCGAGCGGGCTTTTCCTCATTGGTCGATGGGCCTACGGCTGTTCAAGTC  
TCGCACACCGAATAACAGAGGACTACCCGTTGCAAGATGCTAGGTCTTGTCCGTCCA  
CGTTCTAGGCATGAGCCGTTGGCATAACGACATGACAGCCCTTAGTAGGAGCCAAT  
GTCTAGAAG

>CONTIG\_364\_length\_796\_cov\_0.657698

GTTTCCAGGTCTGAAGGTTATGCCCGGCGTTATCTGCAATTGAACGGCGTCTGGCGCG  
ACCATGTGTTGACCAGCAAGTTGCGCGACGACGACCCGCCTGTTGGCGCTTAGAGC  
GGCTAACAAAATACTTACGCCAGTCCACTGCAGGCCGGCTGATCTGCTGCCTGCC  
TGCAGGGCCCTTGCCCGCCCACCATCGCGGGACACGCCGCAAGTACGTCCGTGTAG  
GCTCTTACGCGGCATCCATGCCGCGTAAGGTCCCGCGACGGTGGGCGGACAAGGAC  
CGGTCCAGATGGTCGGTGCGCACGATTAAGAGCAGTGCGTGATGCGCGTTGTTTCGAT

GACGTAGCGCCGGCTCAACGTCCGATGCACATCGCGCGAAAAACAGCTTTTTGCGC  
GACCACCGACCAACTTTCTGGTGCGGTGTCTCGCCGATTGCGGGACCGTGTGGCGG  
CATGGATGCCGCCACCGAGCCTACATGGACGTA CTTGCGGCGTGTCCCGCGAGCGG  
TGAGGGCACCGCGCCCTCGACCGACCAGACTTTGACGTTTTGGTAGCCGCTTTAGAG  
TCAACCAACGCTACCCGCGGTTCCGGGCAGCATTTCATTCTGGACATCTAGGACATCG  
ACGGATACTCCGTTGGTGGCCGTTTCGTCAGGTCGCGTTAGCCACCTTCAATACACGT  
CGCGGCGATAGCGCCCTTTGCGCAGCAGGTCTTGTCTGACATCGGTGCCGAGGATTG  
ACTCAAGCGTCTGATCGACTTCGGGTGCCATGCCGCGCAGGCTGCCGCAGACGTAG  
ATGC

>CONTIG\_365\_length\_795\_cov\_12.890719

ATCCGCATCGCGCACGCCACTCAGACATGCGACTTGGGGAGAGCTGGCTCGGGCGC  
CGAAATCCTCCGCCATGATGGCTTGATGACCGAGAAGCTCGATGGCCTGCTTGACTG  
CCGCACGCTCGGCTTCCATACCCGTGATAAGCGAACTGATGAATATTTTCATATCTT  
GACCATTTGAGCTGTGGAATGACGTAACCTTCGCCCCGGCGAAAATCAGGTGACT  
GTCATCCTAGAGGCTTGGCCACTTGCTCTTCCGTTGTGCTAGTCCCCGGGCCCCATTT  
CAGACCACTTATATCTCAAATGCTCAGACTTCCTTTCAAGAGTTTGCAAAAGCCCAA  
ACGCCATAAATCAGATTGCCTAACTGTCTTCTTAAGAATTATTATATTAGGTAAAGC  
AACTTAATTTATCTGGCGTTCATTTTATTTGCGTGAGATACCTCTCGCTTTTTTGCGAT  
TTGTTACTTTTAAACACTACAAGCGCATTGATGGTTTCAAGCCATTTACACAGCTAC  
AATCATTGAAAGATATAGCCTTGCGATAAAATCTTTTATAAAAGCAAACTAAAAAT  
ACAGCTATTTAAACGACAATTAGCGAGACCACCTTAGACAATCATTGACGCGAAATT  
TCTGTCCTATTTTATCATTGACAGAAAATCCCCTCCCCTTATCAAACGTCTACCTCCT  
CATAATTGGATCGTAGATGCACTTTAAACACTCCCAACTTCATCAATATTTGCAACA  
GCCCAAAGGTCAGTTATCCATCCGAAGCATTTCGCATCGGCAAAGTCGAATT

>CONTIG\_366\_length\_788\_cov\_0.440242

AGGAGGAAGGAGGGGGGAAGAGGAAGAAGGAGGAGAGGAAAAGAAGGGGGAGG  
GGAGGGAAGAGAGAAGAGAAAAAGAAAGAGGGGAAAAGGGGGAGGGAAAGGGAG  
AGAGAGGAGGAGGAGGAGAGAGAGAAGAAGAGGGGGGGGGGAGAAAAAGAGAGA  
GAGAGAGAGAAGGGAAGGGAGGAGAGAAGAGAGGAAGGAAGAGAAAGAGGGGAGA  
GGAGGGGGAAAGAAAAGAAGGAAGAAGAGAGAGGGGGAAGAGGAAAGAAGGGGG  
AGGGAAGGAAGAGGGGAGAAGGAGAGGAAGGAGAAGAGGAGGAGGGAAGGAGAG  
AAAAGAAGGGGAAGAGAGAGGAAGAAGAAGAGAGAGGGGGAAGGAGAAAGGAAA  
AGGGGAAAAGAGGAGAAGGAAGAGGGGAAAAGAAGGAGGGGAGAGGAAGAGAGAA  
GGGAGGAAGGAAGAGGAGAAAGGAAGGAAAAGGGAAGAGGGGAGAAGAGGGAAA  
GAAGAGGAGAGAGGGAAGGAGGAAAAAAAAGAGAGGAAAAGGGAAAGAGAAAGA  
GGAAAAAGGGAAGGAGGGAGGGGAGAGAGAAGAGAAAGAAGGGGAGGGGGAAGG  
GAAAGAGGGGAGGGAAGAGAGAAAGGAGAAAAGAGAAGGGGAGGGAGAAGAAGG  
AGAGGAGAGGGAAGAGAAAAAGAGGGAAGAAAAGAAGAAAGGGGAGGGAGGGAG

GGAAGAAAAGGAAGGAAGAGGAAGGAAGGAGAAAGGAGGGAGGGAAAAAGGGAG  
GGAAGAAAAAGGAGGAAGAAGAAAGGAAAAAT

>CONTIG\_367\_length\_786\_cov\_297.283763

AAGAGATCAGCTGGGTGCACTACATGGTCTATCACAATGGATCCGCAACGACTCTCC  
CCCTTAACCATCTAGACGAGGCATGCTTTCTGAGCGAGGTCTACAAACATCGTCAGT  
ATTCGCATCGCCTAGGGGGACCGCGTTTAGGGTTCGTAGAGATCGTAAGTGGGGCGT  
TGCACGGAAGCACTGGGGGGTGGCTATTAGTTCCGCGCATGGTCATTAAAGCGTTTT  
TGCCAGAGCTTATAGAAATGGGCGCTATTGTTGTTGTGGATGACAAGGGTGGCGTAG  
GGCTTACGCCGGACTTCGAGTGCATCAACTTAGCCTCTGTCAAGTCTTTTAATAGTAT  
CCAGGCAAAACCGCAGGGCGCTACCGCCGTCAATGCCATGATCAGCAGGCCTCAAA  
GTGCGCCTAGAAACGGGATGTGATCAGAACCACACAGCGTAAACAGCGTAGATGCC  
CCGCGCGCGCTCGGACAAATATTCAACCTCCGAAGATGGCAACCAACACGCCAAAT  
AGATTAACCTCTGAAGCCACCGTGCCGCTGGCTATCGCTTGCCTCAGCCAATTGGCCA  
TGAGTCATCCTGGGCAGTGATTTTACGCCGAGTTATGTCACACATCCTGCGACACCAT  
CCGCCCCTTTTTTTCAGTGCTCCGGCCGATTCAAAATGGGATTGCCTAACTGTCTTCTTA  
AGATTGATTGGATTAGGCAAAGCCACCTCATTTATCTGGAGTTCATTTTATTTGCGTG  
AGATATCTCTCACTTTCCGCCCTTTTGTTACTTTTAAACACTACA

>CONTIG\_368\_length\_786\_cov\_64.743551

CATCGGCACTGCCGAAAATCCCCGTCAAAACCGAACGTGTCACCAAGCGACTGCAA  
TTCGACCCAGCGTTAGTCAAGCGCGTTGACGCCTTCTGCGACTTCTACGCGCAAACC  
GCTGGCGCAAAGCCGGATTGGAACGATGCAGCCGTTGCGCTGATCGACCATGCGCT  
AGAGCGCAATCGCGAGTTCGCCAAGTACCTCGCCGAGCAAGCCAAGCCGGCCGCAT  
GACCGCACTGTGACGCCATCTGTTTCGTGCGGCCGCCCACTCGGTGCGGTGCGACGCA  
ACAACCCGCCGGAGTTAGCTCATGAACACACCCGAAAAGAGTCTGGGATATCGCAT  
CGGCGAAACGCTCTACGCCATGTGCGCAGTGGTCACGCCAGCCCGCGCCAGCATCG  
TGATCGTCGGCATGCTCGCCGCCATCGTATTTTTCTGGCTGTCACTGCCCGCTGCGGG  
TGTCGCTATCGGGTTCCTCTCGCTGGCGATGTTCTGGCTGCTGTTGCCAACCGACAA  
GCCAGCCGACAACGACACCGCCGCCAACGACCCGGAGCGCTGACATGCGTCTATGG  
ATCTGCGAGAAACGCGACCAGGCCAAGAACATTGCCCCGCTGCTGGGCAACCCGAA  
ACCTGGTCAGGGCTATATCGATACCGACGATGGGCGGGTCACGTGGGCACGTGGCC  
ACCTCCTGGAGCAAGTGGCCCCACCGGGATACGACAAAGCGTGGGAAGCATGGAAT  
TTTGACGTGCTGCCCATGATCCCCAGCGCATGGAAGCACAAGCCGACTGCTGA

>CONTIG\_369\_length\_783\_cov\_0.599085

CTCTTTTTCTTCCCTTTCCCTCCCCCTCTCTCCCCTTTTCTCTCCTCCTTTTTTTTTCCC  
TCTTTCCTTTCTCCTCCCCTTCCCCTTCCCTCTCCCTCCTCTCCCTCTCCTCTTCTTCCCT  
TCCCCTTCTCTTTCTTTTTCTCTTCCCCTCCCCTTCTTCCCCCTCCCCTTTCTCTCCCCT  
CTCTTTTCTCTCCCTCCTCTCCTTCCCTTCTTTCTCTCTCCTCTCTTTTCTTTCTTTCCC

TCCCTCCTTTTTCTCTTCTCTCTTCTCTCTTTTTGTTTCGTCGATGAAGCGGTCA  
AGTTCGTGCTGCGATTTCGCTTTCGGTCGGTTCACCTGCAGCGTCCCGGCAACCGGG  
AAGCTCAACGTCGGTGCGTGGAAGCCGAAGTCGATCAGACGCTTGGCGATGTCTTGT  
TGACCGATGCCGCTGGTCTTCTCCAGCGGGCGGATGTTCGAGGATGCACTCGTTCTTT  
TCCTCTCTTTTCCTTCCTTTTTCCCTCTTTTGTAGTGCGGCGCGAGACGCTTGGCGAT  
GTAGTTGGCATTGAGCAAGGCCACCTGGGTGCGCTTGCGCAACCCGCCACTGCCCAT  
CATGGTCACGTACATCCAGCTGATCGGCAGGATCGAGGCGGAGCCGTAGCTGGCCG  
CGCTGACCATGCCGCCGGTGCGCAAGGAGCCTCCAATTCCGCTTTCGGAGTCGAATC  
CGCCGCCATGGATGGCGGCATCTTGACCTTCGCCGGCATGGATGCCGGCACGAGGA  
AGATACGGCGCCAGATGCGACTTCAC

>CONTIG\_370\_length\_780\_cov\_0.053599

GCAGACAAGACGGCGGGGCGTCCGGCAGCAACCGTGCATTATATGGGAAGTCGCGC  
CGGATTGCGTTAACGCGTGCGGTGCACAGCTAACCGATCATCCAGCTGTGCTTACC  
GCGCGGCAGCCCAGGCCAGGCCCTGGACCACACCAAAGGAGGGATCGCCCTGCACC  
AGGCGCGATTCCGGAAAGGCGGCCGCGACCGTGTCGCGGATATAGCCTGCGCGCGA  
CATGCCGCCGGTTCTTCACCTCTTTTCTTTCTTCTCTTCCCTTCTTCCCTCCCCCTCCTT  
CCTCCCCCTCCCTTCTTTCCCTTTTTCTTTCCCCTTCTCTCTCCCCCTTCTCTCCCCCCT  
CTTTTCCCTCTCCCTCCCCCCTTCTCTCCCCTTCCCTCCCTCTTTCCCTCTTCTTTTCCCTT  
TTCTCTCCCTCTTTTCTTCCCTCCTCCTCTTTCTTCCCTTCTCTCTTCTTTTTTCTTCTTCT  
CTTTCCCTCTCCTCCCTCTCTCCCTTTTTCCCTCCTTCCCCTTCCCTCCTCTCTCCCTCCTT  
CCTCTTTCTTTTCCCTTCCCTTCCCTCTTCTCTCCCCTTTTCTTCTTCTTCCCTTCCCCCCT  
CCCCTCTCCTCCTTTTCCCTTCTCTTCTCCCTCTCTCCCCCTTCTTTCTTCTCCCTCCCCT  
CCCCTCCCCCTCCTCTTCTCCTTCTCCTCCTCTCTCTCCCTCTTTCTCTTCTTCCCTTTTCT  
TTCTCTTCTCCCCCTCTCCTCTCCCCCTCCCCCTCTCTCCCTCTTCTTCTTCCCTTCTTCTT  
CTTTCCCCCCCCCCT

>CONTIG\_371\_length\_771\_cov\_14.076087

TTGATCACGGGGAACCTTGCCAGGGCAGGTACACCACATCGATGTTCGACGGAAAGGC  
GCGGCATATCCTGTACAAACAGGTTGATGGCGGTGCCGCCCTTCATGGCGAAGATGT  
CATTGGCGAATACAGCAGGAGCAATGTCCAGCAGAAGCCGAACAGTGTTCAGCGTAG  
TGCTTATCCATGGGGGTTTAGGCTCAGCAAGGTGCCATCGTCCAGCCGGCTCATCCA  
GCGCCTGCTACTTCCGGTTCTGACCTGATTGTGCTCAAGCAATAGGTCCACGTCGAC  
GACACCTGACTCTCGTGCCCATGTCAGAAATAATCGCACGGCTTTTACACTGGTACA  
GCAGGAAAGCAGCTGTCCAAGCAGATCCTTACGCGGTGATCGAAGGCCATCAAAAA  
TGTTGCGGCACTCCTCAAGGCTTTGCCTCGTGCCGGCGTCATAGAGCAGCTCCAGAA  
CGGCTCGTTCTGGCACAGCTACCTGCAGGCCCTGGGGCTGTCCTGGGGGAGTGTGCA  
GGGTCTTTCCGGCGAGAGTATCGTCTGGCCAGTCGAAGAGCTTGGCCCCGACATAAC  
GCGCCGGAAAACGCTCGGTGAACCAGGTAGGTATGACGAAACGGGCATCGCCCCAA  
AGAACGAGGATGTCCACGATGCCAGGTTGTGGCGGACCCCCTGAAGCGCCAACGC

GCTTTTCCCTCCGACGTGCAGGCCAGCCACTTGGCCTTGAAGGAAGCGCAGCGCGCC  
ATTGACATCAAAGTCGTCGTTTCGGGAATGCGTAGA

>CONTIG\_372\_length\_766\_cov\_0.145540

TGCCGATAGAACGCGGTGTCTTCCACCGACTTGGCATTGAGCGGTGCGGACAACCTGC  
TCAACGCGACGACGACGAGGATGCGCCGCAGGGCGATCTGCGAACGGTCGGAGAAGG  
AATAGTCGAGCAAAAAGAGATAGATAGAATAGAAGGAAGAAAAGAGAGATTATGG  
AATGAAATAGAGAGAAAGAGAGGAAGGGGAGAGAAGAAGAGAGGAAGAGAGGAG  
AAAGGGAAAGAAAGAAGAGGGAAGAAGAAGAGGAGGGAGGGAGAGGAGGGAAGG  
AGAGGAGAGGGGGGAGAGGAGGAGAGGAAGAAAGGGAGGAAGAAAAGGGGAGAA  
AAAAAAAGAGAAGGAAGAGAGAGAAGGAAAGAAGAAGGAAGAGAGGGAGAGGA  
GAAGGGGAAAAAAAAGAAAGGAGAGGGAGAGAGAGAGAGAAAAGAGGGGAGGGGAA  
GGAGGGGAGAGAGGGGAAAAGAGGAAAGGAGAGGGAGGGAGGAAGAGGGAGAGAGA  
AAAGAGGGAAGAGGAGAAGGAAAAAAGGAAAGAAGGGGAGGAAGGAGGGAAGGGA  
GAGAGAGGAGGAGGGAAAGAGAGGGAAGAGAAAGGGGAAGAGGAGGGAAGGGGA  
AAGAGAAAGAAGAAGAGAAGGGAGAGAGGAGAGGGGGAGGAAGGAGAGAGGAGA  
GAGAGGGAAAGGGGAAGGAGGAGAGAAGGAAGGGAGGAGGAAGAGAGAAGGGGG  
AAGGAGAGAGGGGCGAGCAGCGGCCGCGCCGACGCCTCGGCATGGTCGCGGTGCT  
AGGC

>CONTIG\_373\_length\_749\_cov\_11.609325

TACCGTCACACTGGCTTGTCTTGGGCTACGCAAGCGATCACGTGTCCACCGCCTTGT  
ATTTCTTTGATACGCATCGTATGGCCTATACAGTCCAGCTGGAGGGGGCCACGCGTGC  
GTGGGGGAACACTTTTCTTCGGTGCCCAAGTTGCAGATGAGACGCCAGGCATCATGA  
ATTCTGGCCATCGAACCGTCGTGCTGGTTCGACTGCGAACCCACCAGCTACCTGGTAG  
GTCTAAGCTTGAACGGGCGTGCATCAATTCCTGCCGCACTGCTCACCTTCCCGGACG  
CTGCAGTTGCGGCGCAGACATTGAGCTCAACCACCGCCCATGCAACCTAATGCCGTT  
GATGCGCAGGCGCTTGGCCTGGCAATGCAACTCCTGTTCAAGACTGACCGTAAGAG  
GTTCAGTATCGCAGCTGCCTATGTATGGCTATGGCCTGCGATTGCGCTAGGCCAGCT  
CGTCACGATTGAAGATGAAGACGGGGTCTGGACCGGCTACGCCTTATGGGCTTATCT  
GACGCGTGAAACCGCTAATCATTGTTCTGCAAGATCCCCCGTTCTTGCCGATTAG  
TGA CTGGAACGAAGGTGATCAACTCTGGATCCTGGATTTCGTGGCTATGCCAAGGCA  
TCACCGACGCCTGGCCAAAGCACTACGGCACCGCTTGCGCCCTCACTTCAAGCAAGC  
GCATCGCTTGGTGCGAGATAAGACGGGCGCTATGCTGGGAACCAAGACTCACACAC  
TTCGCAAAGA

>CONTIG\_374\_length\_746\_cov\_63.038772

TGCCGAACCTTGCGCAGCCAGGCGTACAGGCTGTGCGTCGTGACACCCAGCCGCCCCG  
GCGACTTCTGCCACCTTGAACCCACGATCAGTCACTTGCCGGACCGCCTCGATCTTG  
AACTCATCCGTATACCGCTTGCTGCTCATAGACACCTCCGAATCGACCATTTTCCAT

GGCCTTGAGATGTCTAGGAAACCCTGGGCGTATCAGCCCTCCCTTGGTCAATCCCTG  
TTTGTACGCCCTTACGCAATCCATGCGAAAGACGAAGGCGGTCAAGTACGGGAAGT  
GAATATTGGCAGCGATGTCCAACGCTTCTGGTGCTCTCATCCAGTTCATTTAGCGGC  
GATGTCCAGCTCCGTCGCCGATGAGTGTCCATTTGGTTGGCTTTTTCGTATGGGCATG  
AAAAGCCAGTTGAAAAATTCGTCATGACGAAATTCCTGGCGGCTGATAGCAGAGC  
GGGTAGCAGCACCGATGCAAGTCACGTGTGGCGTCGAGTGATTCGGCGAGCGAAGC  
AAGGAGATCAAAAAAAGCGAAGAATGGACAATGCAGGATAGGCCGGGGGCCGGTG  
AACTGTGCGCACAGTTTTAGTCACAGGGTTTTTTTACCCTGAGTTGACCGCGGATCC  
GACGTCCCCCACCCTGAGTAGTGGCTTGGTTTAGAGTCCGGGGGTAAATGATATCGG  
TGTTTGCCAGATGTTGGGCATAAGCAGCCGGGGTCATGCCGCCGATCGCCTTCTTGG  
GTCGGTCCTCG

>CONTIG\_375\_length\_742\_cov\_0.417886

CGGGCTGTCATCGGCAGCCACAACAGACCAGTGCGCCACAGCCGGACCGGAATAGT  
GACAGCCGAACGGCTGTACCGTTGGCACGCTCGTTGGAAGCCATCCACGATGGCGA  
AATCCGACTTGATTTTGACGTGCCTGCCACAAATGGTGAGTCACCTCGCTCTGTCTTC  
ATTGGGGTTCGTCTCGAGGGACGCGATTCAACATCTGTGGCTGAGGCTGCCGATGCC  
CTTAGAAAAGCAAAGATTTCTGCAAAGGTTCAAGCTCTATCAAATCGAGCAAGGCCG  
TACCGCGGAGGTTGAACTTAAGCGCAGCCATTTTTTTCTTCTTCTTCTTTTCTTTTC  
TCCCTCTCCTTTCCCTTCCCTCTCTTCCCTCCTCTCCTTCTCTTTCCCTCTCCCTCCCTTT  
CCTTTTTCCCTCCCTTTTTCTCCCTCTTCTCTTTTTCTCCTCCCTCCCTTTCTCCCCCTCCT  
TCTTCCCTCCCTTCCCTTCTTTTCTCCTCCCTCTCTTCTCCTTCTCCTTTCTCTTGAGCAGCC  
GCACCTTGCCCAGCTGGCGGGCGATCAGCGTCGGCGCCGGCTGGCTGGTGATCCGG  
ATGGCGACATCGAAGCCTTCTTCCACCATGTGCGACCAGGCGGTTCGGACAGCGACAG  
GTCGAGCTCCACCTGCGGGTAGCGCGCGCGAAAGCCCGGCAGCAAGGCGGCCAGCC  
GCTCGATGCCGTAGCTCACCGGCGCGTTGACGCGCAGCACCCCGGCCGGTTC

>CONTIG\_376\_length\_735\_cov\_386.195724

CGCAGCAGTCCACACTTCGCAATCAACGTGCCGCATTGCTGGGTGAAATCACCGAG  
ATAAAGACAACCGCCAGCAGACAAGCGAGTGAAATCGAGCGCGAGAAATCCACGA  
TCGAAGATCAAGTGGCCAGAGCCAAGTCCGACCGGCTGCAAACCATCACCTACCC  
TTGAGCGGCACCGTTGCAGCGATCTATGCATCCCAAGGTCAGCGTATCGGCACCGAC  
TCGATCATTGCGTCAATCACCCCAAGCGAGTCGGTGTTTGAAGCTGAAATCCTCATT  
CCTTCAAGAGCCATCGGACATGTGACGGTCGGCACCGAGGTGCTGCTCAACATCGC  
CGCATTTCCCGAAAGCAAAATATGGCGCCATCCAGGGGCGCATCGCATCGCTGTCAA  
CCCAAACCAGCCCCCTTGGCGAGTTGGAGCGCCGCTATGGTCGCCAGTCGCCACCG  
AGCCGGTTTACACCGCCAAAGTCGCATTGCCTTCCAGACCATCGGCGTCGCCAAG  
AAGCGAAGTCCTTCCCTGCCGGGGATGGAGGTGGACGCGGAACTGATCTTGGAGGGC  
CGCAAGATCTGGGAGTGGATGTTTGACCCCTTCCAAACCATGGGATCGCGCTTGACG  
GGTGAAAAGCGATGAAGGACGTCTTGACACCATCCGCCAATGGCGATGCCGAGCCG

GATCGCTCTGCTGAACCAAGCCTGGTGTTCATCAAAGCGCCGTGTGCCGCATATC  
CG

>CONTIG\_377\_length\_730\_cov\_0.611940

GCGCTCGGCATCGGCCAGGATGGTCGACGGCGCTTCGGCAGTCGCTGCGGGCGACCA  
CAGGCGTTTCCGACGCTGCGGCAACGGTTGCCGTCTCGGCGGCAACGTCGCCTTCGA  
CACGCGGCTTGCGGGCGCGGACGCGGCTTGCCATCGGCACTGCCGCCGTACGGCGA  
CCACCGCCACTGCTGCTGCCGCTGCGCGAAGCGCCACCCGGGCCACTACGGCCACC  
GCCGCGACGCTGTTCTTCGGCTGCACGCTGTTGCGCGCTTCACGGAAAATGGTGCC  
CACGCTGTCGCCAGCGTCGTCGTCGGCCTCTTCGCCTTCCACCGGCACGCGTGCCAC  
ACGCGGCAACGGGATCAGCAGCTCGGAGGTCACCGGCTCGACCGGGATCTTCTGCG  
CGATGTAGGCCTCGATGTCCGGCAGGCTCATCGCATAGCGCTCGCAGGCGAAGCTG  
ATCGCATCGCCTTCTTCGCCCAGACGCGCGGTACGGCCGATGCGGTGTACGTAGTCT  
TCCGTATCGAAGGGTAGGTCGTAGTTGTAGACGTACTTGACGCCGTGCATATGCAGG  
CCGCGTGCGGCCACGTCGGTGCGGACCAGGATTCGAGCTGGCCCTTCTGGAAGCG  
GTTGAGCAGCGACTCGCGCTTCTTCTGCGGCACATCGCCGGACAACACGCCGACCCG  
GTAGCCATGACGCTCAAGGGTGCGCGCCACGCGCTCGACGAACGCCTTGGTG

>CONTIG\_378\_length\_725\_cov\_0.811037

GTTTTGTCCCCGATCTCGTGCAAGGCCTGCGGGCCTCTCCCCATGCTGAGATGGGTGA  
AGTCTGCACTAGCGCCGACCGTGCGTACCCAGCTATCTCTGGAGGAGAGAATGGCTT  
GCGGTGTAGGCGCGTGCTACGCCTGCGTCGTCGGTGATGCCCCAAACCCCGATCACC  
AGTTTCGGGTGTGCTTCGACGGTCCCGTGCTCGCGGCCGAGGAGGTTCTGCTATGAC  
TAGATTGACCGTGTCCCTTCCGGGCCTGAACCTTAAGAACCCGATCATGCCCCGCCAG  
CGGGTGTTTTGGTTTTGGCGCCGAGTATGCGGAGTACTACGACCTGTCGGTGCTTGG  
GTCGATCATGGTCAAGGCGACCACCTCGAGCCTCGCCGTGGCAATCCGGTTATTCCG  
GGTGGCTGAAACCCAGGAGGCATGCTCAACGCCATCGGCCTGCAAAATCCTGGCC  
TCGACGTCGTCATGGCCGAGAAGCTGCCGTGGTTGGCTGAGCACTTCCCGGACCTGC  
CCATCATCGCAAACGTCGCCGGTTACACCACCGAGGACTACGTCAGGGTCTGCGAG  
GTCATCTCGACGGCCCCCAATGTGGCCGCTGTGGAGATTAACATCTCTTGTCCCAAC  
GTCAAGCGCGGTGGAATTACTTTCGGCACTAATGCGACCGCAGCCCATGACCTGAC  
GCAGGCCGTCGTCGCAGCCGCTAGTGTGCCCGTCTACGTCAAGT

>CONTIG\_379\_length\_720\_cov\_58.812816

CGTCGACCGCTTCGCGCTGGTACCAGCGCGGTGTTTTGCGAGCCATGTGTGGGTGCG  
CTGCTCTTGTGGGTGCGTAACGCCTACGTTACAGCAAAACGCCTACGTCGTAAAGC  
CTAGGCGTTTGTGGGTATTTGACGGTGCGCATCTGGCGCGTGCGCACGTCGAGTTG  
CTTATCGGCTCGGTGCGGTATCTGTTTCTTGGCGAATGCGCCAGGCGACCATAACGGC  
CCAAGGGTGGGACTTCTTTGGCTTGTGGGCAGTCATTTCGGTATATTCCAAACTGATA  
CGCAACGGGATGCCCCGGCTTCGATGAGTAGTTGAATGCGTAGCCGGTACGACACAG

CATTTCCACCAAGGCGTCAACTGAGAAACGGTCTAGCTTGCCGCGCATCAGGTGCGT  
AATTCTTGGTTGAGTGGTTTTAAGCTGCGTACCGGCTTCGGCCTGCCCCCACCCTTTA  
GCTCGAATTATGTCGATCAGCGAAACGGCTAGCTTGGACTTTAACTCTTGCTTGCCA  
GATTCACCGGGCTCTGATGAGAATAGCGCATACACGTTACGGCCGTACCTTTGAAA  
TACTGTCCAGGCAGTCCGCAGTGGCTGCCCCGCTTGTTGTCTCGATCTACGATCGCCC  
ACTGCGACGACACGTAGGCCGCAGCCCAGGCCATCCAGTCGGTCGACGGGCCACCG  
GTCGCATCGGTCGGCGGATCGCTGCTATCGATCGCCG

>CONTIG\_380\_length\_719\_cov\_123.646959

CCATGTGGGTTTCGTTGCTCTCGCTGCCAGGCGCGCCGCTCGCTTAAGTACGCGCCTG  
ACACTTACCAGCGCCTGCCGTGCTGCCGGACCTACGGATGTACGGCCGCGCGCCTGC  
GCACCGGCAAGCGCCAGTCCTACTACGTCGACCACTACCGCCAGCACGTCGAGCGC  
AACCACGGCGCGAAGGCCACGGTGTGCCGGTGCCACGCCTATTACTTCCCACACCG  
CCAAGCATCTGGCAGCTGCCAGTGGCGCGTTTCTTTCTAGGAGTTACACACATGAAA  
CAGTTTGAAGTCCACAGTCCCCACACGGGCAGGACGGAAGTACTAGACGAAGGGTT  
GGCCTTGTCTATGGTTTCGACCGCGACTGATTCCTTGCTTATTCAATGGTGTCTGAG  
GGCAGGTCGTTTCGTCGATTCTGACGGTTTCTCTTGGGTGCGCTTGGGCGACGTTGCG  
GATGTATGGCCGTGAACATCGACGCGCTCAAGCGCCAGGCCAAGCAGCTAGCAGCG  
ACGTTTCGGCCGCACGCACTCCGAAGCCCTCGACGAGTTGGCCCGTCAGCGCGGCTA  
CTCGAACTGGTCCCACCTTATGAAATCCACCGGACACAAGTCATGAAACTCGCAGA  
CCTTAACATAGCAATTGTGCTGGGCCCTGTGCTTACTAACCAAGCGGTTAGCGAGAG  
CGTCTCCGGCCTCTGGGTTAGCGTCCAAACCGCTCAAGCC

>CONTIG\_381\_length\_719\_cov\_63.822635

CTGTTCCGTCGCTTGAAAGGCTACCGCCGGATTTTCTCGCGCTTCGAGAAGCTAGAT  
GTCATGTTCCCTTGGATTCCCTCAGCTTCGTCCTAGTCGTTGATGGGCTTCGGATGTGTT  
AACAGGCCCTAAGTAGTCAGCCCAGGCCTGCGTCATCTTCCGCCTTTCTACTAAGGTG  
GGATTTGCAGTTAAAGGATCGTCCGAGCGGGTCTCGTACGGCATGTACAAGCTGGTA  
CTCAATGAAGTTAGGTCGGAAGCCCGACACGCCTGGTCGCTCGGCACCTTCTGCTACC  
CGACGCCCCGTACTCAACGATTTGCCGAACAGCCTCGATCTTGAACCCGCCCAAGCCA  
TAGTTTATGGCTGCGAGATATCTACGAAATCCTGGCGCCCCCACTCTGCATCACGCA  
CTTGCTGTGTTTGCTTATGCGGGTTTGGAGACTCCTGAGGACCAAACGACGCCTATT  
CAATTGACTCACGAATAGGCGCGCTCTTACTCATCCGGCGTTCTACGCTGAAAGCGA  
CCCATCATGCTCTCAGCACTGAGTCTAGATGCACGTTGACAGCACTGCCAATGCCTC  
CAAAGACCTTTTTGATCGATCCGACGTCCACCCAATTTTGAGTAGCGCCCCAGTTTG  
GAGTCCAATTCCCTACCCCGAGGAGATTGGACGTGAAGAAGCGCTTTACCGAGGAA  
CAGATCATTGGCTTCCTGCGCGAAGCCGAAGCGGG

>CONTIG\_382\_length\_705\_cov\_20.470588

GTGCTCCTATGGGAGACTTTGTGGAAAATAGCAAAAATATAAGAGCAGAGCTACCG  
TTGACCTCCAACCGAGTAGCTCGCCACGAAACAGTTTCAAACGAATTCAATATTTAC  
GTAGATGCGCTAACGGCCTCAACTTCGAAGACCGAATTAGCTGAACTCAACCAAGC  
GTATCGAGACCTAAAAGCCAATCCGGCGTAATTCGTTCTGGTGCAGTTTTGAGTGTT  
GTTACTCTCACTGCACCATCCCACGAATTATCTAACCTACAAGCTTCCTGCCAAGTA  
TCGTTATGTGCTAAACCAGGGCCATCAGCTAAGAAAACAATTCTAAAGCGGTGCTTA  
TGTTCTAGGCAAAATGTTCTTGCCTTTGAGACCTTATCCGCGTTTCCTCCCGTTCGAT  
CATCAGACTGTGCCCCCTCCCCGGGTGCGGTCATATCGGGCAAATCCAACAGCGCATA  
TTACCCCATCACTATCTTCAATTATAAAATCGCAAGGGAAGTCCCCTTCATAGGTAT  
CATAAACCGTTCTTAGCTCGATATCCCTCCCTGCACCACGCGGCCCTCGTATGGTGA  
ATCTCCCATCGAAATACCCATTAAACCAATCGAAGAACATTCCAGTAAGCATATATC  
CAGATTGGCCGCGAGTGTCATATTCACCTACCAACGCTGCCAGCGCGGCTTCCTCCA  
ACGGAGTGAAGCCATTAAACTG

>CONTIG\_383\_length\_705\_cov\_14.674740

GTGCTCCTATGGGAGACTTTGTGGAAAATAGCAAAAATATAAGAGCAGAGCTACCG  
TTGACCTCCAACCGAGTAGCTCGCCACGAAACAGTTTCAAACGAATTCAATATTTAC  
GTAGATGCGCTAACTGCCTCAACTTCGGAGGTTGAATTGGCTGAACTCAGACAGGCG  
TATCGAGACCTGAAAGCCAACCCGGCGTAATTCGTTCTGGTGCAGTTTTGAGGGTTG  
TCACTCTCACTGCACCGTCCCACGAATTATCTAACCTACAAGCTTCCTGCCAAGTAT  
CGTTATGTGCTAAACCAGGGCCATCAGCTAAGAAAACAATTCTAAAGCGGTGCTTAT  
GTTCTAGGCAAAATATTCTTGCCTTTGAGACCTTATCCGCGTTTCCTCCCGTTCGATC  
ATCAGACTGTGCGCCTCCCCGGGTGCGGTCATATCGGGCAAATCCAACAGCGCATAT  
TACCCCATCACTATCTTCAATTGTAAAATCGCAAGGGAATCCCCTTCATAGGTATC  
ATAAACCGTCCTTAGCTCGATATCCCTCCCTGCACCACGCGGCCCTCGTATGGTGAA  
TCTCCAGCGAAATACCCATTAAACCAATCGAAGAACATTCCAGTAAGCATATATCC  
AGATTGGCCGCGAGTGTCATATTCACCTACCAACGCTGCCAGCGCGGCTTCCTCCAA  
CGGAGTGAAGCCATTAAACTG

>CONTIG\_384\_length\_702\_cov\_1.053913

GCCTTGGCATTGCCGCCGTAGACATAGAACACGTTCTTGTCCGTGCCGGGCAGCACG  
CTGGGCAGCTGCACCCACAGCACCGCCAGCTCATTGACGCTGTCGAAGCGCTCGAT  
GCTGAACTTCAGCGGCGTCTTGTGTCGCCCCGCGATCACGCGCAGGTCAGAGCCGTC  
CTCCTTGGCCGCCGTGAAATCGAAGTTGCCCCGAGTGCAGGCGCACGGCCACCGTCA  
CATTGCTCGCGGCCTCCTTGGTTTTGAGGCCCTGTGCCGAGGTGTTGAGCGTGATCTT  
GGCGCGCTCGCTCCATTCGCCGTTCCACCAGGCATGGGCGGTGGAGGGCAGCAGCG  
CGGCAATGGCCAGAGCCAGGGAGGGAATCAGGGCGTTTCTCATGCTTGAGGTCCGG  
TTTTTCTTCAAATCGAGGTTCACTGGCCGCCGAAGCCGAGGAATTCGAGCAGCAGAT  
TGCGGCGTTTGCGGCGGTTTTCTTTCTTCTCGGGGTCGCTCACGCCGGCCGAGGT  
CGGTGCGGTGCGGTGCGTCACCGGCACGGCCACAGGCACGCTGATGGCAACGTCCG

CCGTGGCGCCGGAGCGGGTGCCCGACACCTGGATGTCGTTGGCATTGACCAGCCGTT  
CCGCACCGAGGAAGGCTTGCCCTTGGAACGGATGCCCGCCTCACCGGCGTTGATTTC  
ACCGGTGGGCGCGTACAGATC

>CONTIG\_385\_length\_701\_cov\_0.898955

TGCTTAGCATCACACACCTCGACACGGACGGTGACAAGCCGGTACCAGAATATCAA  
CTGGTTACCCATCGACTACGCCTGTCGGCCTCGCCTTAGGACCCGACTCACCCAGGG  
CAGACAAACTTGACCCTGGAACCCTTGGAATAATCGGCGGACGGGATTCCACCCGT  
CACACGCTACTCATGCCTGCATTCTCACTCGCATCAACTCCACCACACAGTCACCCG  
GCAGCTTCACCACTGACACGACGCTCCCCTACCCAACCACACAGGTTGCCACAGCTT  
CGGCGGATAACTTAAGCCCCGCTACATTATCGGCGCGGAATCACTTGACCAGTGAG  
CTATTACGCACTCTTTCAAGGATGGCTGCTTCCAAGCCAACCTCCTGGTTGTCTACGC  
AACTCCACATCCTTTCCCACTGAGTCACCACTTAGGGGCCTTAGCTGATGATCTGGG  
CTGTTTCCCTCTCGACGACGAAGCTTATCCCCGCGGTCTCACTGCCACGCTACACTT  
GCCAGCATTCGGAGTTTGGCTGATTTCCGTAAGCCGATAAGCCCCCTAGACCATCCA  
GTGCTCTACCTCCAACAAGAACCACGCAACGCTGCACCTAAATGCATTTCCGGGGAG  
AACCAGCTATCACGGTGTTTGATTGGCCTTTCACCCCTATCCACAACCTCATCCCCTCC  
ATTTTCAACTGAAGTGGG

>CONTIG\_386\_length\_701\_cov\_0.517422

AGGGGGGAGAGGGAAGAGGAAAAGGAAAGGGAAGAGAAAGAAGAAAGGGGGGAGA  
AGAAAGAAGAGGGAGAAAAGGAGGAGGGAAGAAAGGGAAAAGAGGGAGGAAGGG  
GGAGGAAAGGAAAGGGAAAGGGAGGAGGGAGGAGGAAGGGGGAGGAAAAGGAAG  
GGGAGGAAGAAAGAGAAGGGGAAAAAGAAAGAAAAGAAGAGGAGAAAAAGAAGAA  
AAGGAAAAAGAAGAGGGAGAGAGGGGAGGGAGGGGGGGAGAGGGAAGAAGGGAG  
AGAGAGAAGAAAGGGAGAAGGGGGAGAAGAGAAGGGAGGGGGGAAGAAGAGAGGA  
GAGGAGGGGACACGAAGCCGGAGCGGGGCGCGGAGTTCTATCTGGAATACGGCGA  
TTTCGATTACGCGGTGACCGTGCCGGAGGGCTTTCTGGTCGCCGGGTCCGGCGCGCT  
GACCAATCCGGCCGAGGTGCTCAGCCGCACCGAGCAGCAACGCCTGGAACAGGCGC  
GCGGCAGCGATCGCACGGTGCTGATCCGCACGCCTGACGAAGTGACTGCACGTGCG  
GCCATGCCGACGGGCAAGGGCACGCAGACCTGGCGCTTCCATATGGACCACACGCG  
TGATGTAGCGTTTGCCGCCTCGCCCCGCGTTTTTGTGGGACGCCGCGCGTATCAAGCT  
GCCCCGATGGCAAGCAGTCGCTGGCGATGTTCGGTGTATCCG

>CONTIG\_387\_length\_700\_cov\_10.891798

GATCAATCTGCTGGGACCAGCCGCCGCGGAGCACGGTCGTCCTGACGATCAGCTGC  
CCTGCATGAATACATTGGACATCAGCCGGGCAACGGCTGTCCTCAATCACTTGGTCG  
GGACGCACCTTGGGACCATCGACCGCCGCAATCTCGCCCAGACGCACGGGGCCTTC  
AATGGGCGAGCTAGTGACGGGGCCAGTCGCTGCGCACCCGGCAAGTGAGACGACCC  
AAATCGTTGTAAGCACTCGCACTCGCATTCGAGTAGCTAGGGCAGCTTTTAGCTGAG

CGTTTCGCATGGTTGGCCGCAGGTCGCGAGATGGCCCGAGTGTCCCATAGCTTTACG  
AAACACGGTTGAGCTGCGTGCCTGAGACTAGTCCAGCCGAAATGCTGTGAGCGCGA  
GCACTTCTTGTGAGCGGACTCTTATGGCATGAAAAAGTTAGCGCTCGGCAAAAGAGT  
GAGGGCGATTGGCAAAAATTGCACGCCAGCAGCATGCAGCCCTCTTGGCGCCTCAA  
CCACCGGCATGGGAGTAGCGCATCACTACTCTCCACCAGCGCTGGGCCTCTTGAAGG  
GAATCTTGGCTTCGCTGTCCCGACCGCAAGGACAGGCCTCCTTCTCGTCGCTGGCGC  
TTTGTTCGCGCCCTTCGCTGTGCGCCGCTTGC GCGGTGCTCGCTCTCGGGTGCGGTAG  
GGCCGGACGCTTCGCCTGTC

>CONTIG\_388\_length\_684\_cov\_1.193896

CATGCTCCAGCCCGCACC GGACGGCAAAGCGATCTGGCGTGCAACGGTGACCAGCT  
CAAGCGGCTGGTAACATGACTTTACGTTACTGCGGCTCTCGCCGGCCCTGATCTGGG  
AGGCTGGTGAGCGGCCGGCCGCATACGCGGGGACGGTGCTTGTTGAAGCAGGCCAA  
GGTGCCGATGCAGCCGGCCAGAGTGCGCCGGACTTGCTTGACTCGGCCATGCAGGA  
CACCGCCGATGATCGAGCCAATCCGCCGTTGGAATCGAAGCCTTCGTTGAGCACAC  
AACCCGTAGCGAAAAACGCGCCGGACATGATGGATGAACTGCTGGCAATGATTGGG  
GCACCAGATCCGCCGAAGGCCGATGACCAAGGAAGTTCATCGTCTCAGCCAATGCC  
TGAAGCTCCCGGAAAGCCACACCAGGTGAGCGAGTCCGTCCCAGCGAAAAAAAATC  
CAATGTCGACCAGTACCCAACCATCCAGGGACGAGTCGAATGGCACCTCAACTCAA  
ATGTCAGCTGATCATTTTGTGACATGGCTGCAGCAGGCGATTGCATCGCGCCGACTC  
GTCATCAACGACGCTAAGGCGCTGGTGCATATCGTGGCGGATGCCGTCTATCTGGTA  
AGCCCAGGTGTGTTTCAGCGCTATGCGCAAGAACATCCTCAAATCGCTGACTATGCC  
AAGCGTGA

>CONTIG\_389\_length\_684\_cov\_0.649910

AGTCCACGGTGGGGGCGAAGAGGTCGTAATGATCGGCGTTTCTCTGTCTGCTGTTGCG  
CATTCCGTTGGGCGGCGCGGTCGGCAGCAACGGTTGCCAGCCGGTTCACGTCCGTCG  
TGAAAGGGCCGTGCGGCAACTGATCCGATAGCTGCTCATCCTCACCAGGTGTTGTA  
GGTAATCGTAGTGCGCCTCGTTGCACTCGTCGTTGAGCATCTCGGCCAGCGCGGCCC  
ACTCGTCCGGAGTGAAC TGCGGCATGTGCCGCAGGATCAATTCGCGATACGAACTTA  
GGATCTGGGAGAGCCGCGCGTGCACGAAGCGGTGGCCGGTGAACATGGCCGCGTTG  
GCATGCACTAGCCAGACACACACTTCGTCTGCTCTCCGTCTTTTCTTTTTTCCCTCTTC  
TTCTTTTTCTTCTCTCTCCTCTTTTCTCTCCCCCTTTCCCTTTCTTCTTTCTTTCTCT  
TCCTTTTCTTTCTCTCTCTCTTCTTTTCTCCTCTCTCTTTTCCCCTTTCTCTCTCC  
TTTCTTCTTTCTCTTCCCTTCCCTCTTCCCTCCCTCTTTCTTTCCCTTCTCTCCTTTCCC  
CTTCTTCTTTTTTTCTTTCTCCTTTCCCCTTCTTTTTTCCCCTTTCTTCTTTCTCTTC  
TCCCCCTCTTCTCTTCTCCTCCTCCTCTTCTTTTCTCT

>CONTIG\_390\_length\_674\_cov\_0.252285

CTCCTCCCTTTCCTTCCTTTCTTCTTTTCCTTCTCTTTTTCTTTCCCTTTCCTTCCTC  
CCCTCCTCCTCTCCTCCCTCTCTTTTTCCCTCCTTTCTCCTTCCTCTCTTTTTTCTCCC  
TCCCCTTTTTCTCTTTCCCCCTCCCCCTCTTTTTTTTTTCTCCTCCCCCCTCCTCC  
TCTCCTTCCTCCTCTTCCCTCCCTTCTCTCCTTCTCCCTTCCTCTCTTCTTTCCCTTCC  
TCCTTTTCTTCTCTCCCCTCTCTCTCCTCCTTTGCTTCTGGAGCTGCCGTCCTACCGCG  
TGCCGCCCTTCTCTCTTTTCCTTTTTCTTGTGTCCTCAGTGATGTGGGCGCGGA  
AGCCTGCGTTCAACCTAAGTGCTCGAAGCTGTCTTCCGTCCGCAGAGAATCAAGCCC  
CTCTCCCTGCGGGAGAGGGGTGGGGTGAGGGTACGAGCGAAGCCTGGTGCAATTG  
AACAGTGCGAGAGCTTCGCCCCGACCCTCATCCGCCCTTCGGGGCACCTTCTCCCG  
GTGGGAGAAGGGTGGCTTCGATGAGATTTACGAGCTGTTTGCGCACCTTCCTTACTT  
CCGTTTAGCCGCTGCTTCGTACCTTTGATCGAACCGATATGACCGATCTACTCGCATC  
CACCTGACGCACCTGGAAACGCTGGTGTC

>CONTIG\_391\_length\_673\_cov\_0.635531

GGTGGAAGAACACACCACCTCCAAGCGCCAGCTGCTCTATAAGCGCCTGGACGCCG  
ACATCACCGACCTGCTGCGCGTAGACCCGGACCACGCCCTCGGCCGCCAGTACTGG  
AACGACATCAGCTACGCCAACCAGGGCGCGTTGCCTGTGATCTGCCCACTGTGCCG  
AAGGGCGTGCTGCCTGGGCGTTCTGGCAGCTGCAAGACCTCAGCGCCACCCGCCG  
CTACATCCGCTGGTGGATCGAGCAGCGTCAGGTGGCCTACGGCGATTTTCGGCGGCG  
GCATCTCCGACGATTCGGACCTGGTGCAGCAATGGCCCGGCGTCGCCCTGATGGGC  
GTGGACCCGGACATGCTCAACGCCTCCATGCTGGCGCTGTCCGATGCCAACTACCGC  
AACGGCATGTTACCAACGGCCTGTCCACCATCGAAACCGACGAGCTGCATGCGTA  
TGAGGAGGGCATCAACCTCAACAGCGCCCTGCTGTATCTCAACTGGGGCGACCCTTT  
TCCTTTCTCCCTCCTTCTTTCCCCTTTTTTTGTTTTTCGACACCATTATCCAGGTCAACC  
CGCAAGGCCACCTGCTGTTTCGCCAGCAATGGGTTTCGGCGGCCGACCGTCTACCGCG  
ATCCCAACTGGCAATGGCATAAGCCGTACTCCTTCCCCATCGTGACGTT

>CONTIG\_392\_length\_671\_cov\_12.042279

GAATTAATTTATATTTAGGTCATGCATCTATGAGGCTTTGTGTTCTTTTGTTTTTTCCA  
ATTTTATATCTTCCTGTAATTGCTTGGGCTCAAGGCTGTCCGCCAGGGCAGTATCAA  
ATTGGTGGGCAGGGAGCTATCGCATGTGCGCCTATTCCCCAAGGAAGCTCTCAAGA  
AACTGCACCAGCACCTCGACCGCTGGGAAAATGGATCAAAACCTGGGGGGCTATTG  
CCATTGGATGGGTAGGCCCTATTCCTTATTATGGTGTACCTGTAGGAAAGCTTTCCA  
AATCCGATGCTGAATCGGATGCTCTAGAGCGCTGCGCCAAGAAAGGCGCTAAAAAC  
TGCGAAATAAAGCTGACTTACTTTAATCAATGCAGCGCTATAGCCGAACCGCAAAC  
AGTCGAAAACCTTGATACCTGACGGTAGTACGACAGTTTTTGTGCGCAATGCCTCTTT  
AGATGGTGCAGCTAATCAAGCAGCGGAAGAATGCAAAGCTAAGAACAAGAACTTTG  
ACGTAGGATGCAAGGTCATTTACAACGCCTGCTCGAATCAATTATTTCAAAAATATT  
GACGTCGCTAACTTAAAATCGAACCTGATTAGCCCTGACCATCAGCCGCCTGTCGCA  
GGATCTGCGCCGCGCTGGGTGGATGCTGCTGTACCTGAAGCCAACG

>CONTIG\_393\_length\_671\_cov\_4.518382

CTACGGAACCCTGGGCGTATCAAATTCTGATGCGAGAAAGGTCATTGATTTTCATTGC  
ACACGCGGAGGGGGCCAATCCCGCCAGAGCTATTGGCTATGGCAACATCGGACGCGG  
CCGTGGAGACCGCATTAAAGGCCACCAGCCATTTGTTGGGCCAGACGAAGCATGGC  
TGGAGTGTATTTTCATAACAGCTTCCGCTTATTCGTTATGGAGCAACCGTCCCTTCGCT  
TTGGAAAGCCGAATCTGGATTATAAGCCTGCTATCTATCGTCGATTGTCTGAACTAA  
CGCTGCACGCGGAAACCAACAATCCCCAACGTTGGCTGGAGCTCAGATACTTGGCG  
CGTGCTGAGCAACATCGCGATGTACTTGCCCTCGCCCAACCATCCCGCTTTAGACAC  
CAACTGGCGGACTCACGGGCAGCAACCGATATTCAGGCCGATATCCGGCTAGCCTT  
GATCTGCGCAAAGTACGAACACGATGTATCTATAGTGTTTAGCCTGCTTTTGGCCAG  
GGACGAAATTGAACGACGCTCCTCCGCAATAGAACATGCTCCTACGACGTCCCCC  
ACCCTGAGTAGTGGCTTGGTTTAGAGTCCGGGGGTAATGATATCGGTGTTTGCCAGA  
TGTTGGGCATACGCAGCCGGGGTCATGCCGCCGATCGCCTTCTTGGGT

>CONTIG\_394\_length\_669\_cov\_19.610701

TGTCCGATGAGACGATCAAGCGTGCGCTCACCCGATCAGAAGAGCTGACCAAGGAG  
CAATTGCAGACGCATGACTTTTCCGGCCAGCGCGAACGGGAAGTACGCGTCAAGT  
CGAAGAAACGAGCGGTGCGATGCAGGAAGTCGCTCGCAAGATCTCAATCTTGAA  
AGAAATACGCCAAGAACAAGAACTGTTGAAGACCATTGAGCCGCTGCTTGCTGAG  
AAGTATGTGTCCAAATACACCTACCTACCTACGAAAATGCCCTCTTGGATGCAGAG  
GCGCAGGTCCAGGATGCCCCGCGCGCAGCAGTCCACACTTCGCAATCAACGTGCCGC  
ATTGTTGGGTGAAATCACCGAGATAAAGACAACCGCCAGCAGACAAGCGAGTGAAA  
TAGAGCGTGAGAAATCCACGATCGAAGATCAAGTGGCCAGAGCCAAGTCAGACCGG  
CTGCAAACCATCACCTCACCTTGAGCGGCACCGTTGCAGCGATCTATGCATCCCAA  
GGTCAGCGCATTGGCACCGATTTCGATCATTGCATCCATCACCCCAAGCGAGTCGGTG  
TTCGAAGCTGAAATCCTCATTCTTCAAGAGCCATCGGACATGTGACGGTCGGCACC  
GAGGTGCTGCTCAACATCGCCGCATTCCCGAAAGCAAAATATGGCGCCA

>CONTIG\_395\_length\_664\_cov\_49.452514

TGAAGATTGTTTGACCGCCGACGTTCCGCCGTGCTGCTGCTCGTTGGCACCTGGCGCG  
CCTGGCCGACGTACTCGGCCACTTGGGCGCGCTGCTTGCTGTCGAAGTCCGACCGCG  
CTTTGGCGACACGGGGAGACAGCCGCTCTGGCTGCGCGGGTGGTGGCACATATGCC  
GGCGTAGACGTGGCTGCGCTGTCTGGCAACGGGTTTCGCATTGGCAGTGGCTGTAGCG  
TTGTCATTGAGCGCGCTGGTGATGGCAGGCACTTGGGGTGCAGTCTGCGCGTTGGCA  
GCGCCGGCAGTCAGCAGTAACAGGGGCAGGATGTGCGTCTTCATGGTTTGCATAGT  
GTTTGCACCTCGTAGGCGAAAAATTAGGGGGCGCTACCGATGTGCGCGCTGCCAATTGA  
AGTCAGTGATGAACAAGCCAAGCGGGTTCACCAGCTCGACCTTGGGGTCGGGCGTG  
CTTTGCTTGATGGTGAACGTGGAGGTCCACGTCGCCCCGCTCTTTGACCTGGCCCTGG  
TCGGTGAAGCTCGTTTCCACCCACCGCACCTGGTAGCTGTGCGCCGACACGGGCACC

ACGGAGGTGACTTGCGTGGTGACGGTTTCTTGGCCGACCTTGCTCATGGTCTGAACCC  
GGCACGCGGGCTTCGGCATTGAGCTTGTTTGCTGAGGCCG

>CONTIG\_396\_length\_662\_cov\_38.104673

CGCGCGTCTGGATGGGGTCAGGGGCGGTGCTATACAGATCTAGGCCATGGCCTTTGC  
TTTGGTAGAACTGCATCTGCCAGTTAACGCGTGCCTCCCGTCGATGGTCCCGTCATA  
ATTGTTGCTCGGGTTGGCGGTGGTCAGAGTTGTTGAGATGCAACGACCTTGATGAT  
GCGAAATGAGGGCGGGGCGTTTTATGAGCTGTTTCGCGAACGGGGTGTTGATGTC  
GGCTGGCGAGATGGAGTTTGACAAGATCAGGTCAAGTTATTCGGCTGGCCGAACATG  
CAGTCGTCCAGAACACGCCCTTTGCAAAACGGGACGATCTACTCCGGGCGCTTTCTG  
ATGAGCTTCTGGTTGGTCCTTGGCTGATCCTCAGCGGGCTTGGAATTCTCTGGAAGC  
GTTTTGTGTGGGTCCTGGGCTTGACGATCATCATCGCGGTTTATCTCCGCTTGTTTCA  
CCATGCTTTCAGTGCTTCGGCAGCGTTTCGGAGCGCTGATGCTTGCGACTCTATGTGTC  
TATTTTGGACTCCCAAGTCGGACGGTTCTGGCAGGGGTCAACGGTAGGGCCATCGGT  
GCGCTTGACAGTAGCTATCGGTGAGCAGGTTTCGCAGCAAGGATGAGCTGGAAAGACT  
GTCCTCCGGCGTGACAGCTGGTCAAAGTTCAAACCAC

>CONTIG\_397\_length\_661\_cov\_42.106742

CCGATCAACCCTGACGCGCTATGCGCTGCAATCTCGATCCGCCCAACGCCAGAGCCA  
CTGTCTTTCCAGATTTTCAAGAAGAAAGCGTGTAGATCCCTTGGGAGGCGTTACCGAT  
TGCTCGGCAGCGGCACCGCCGCTCGATGCGGCCAAGCCGAAATACGGACCGAAATC  
CGGCCGATTGAAGAGCGCGGCCCCCGGGGGAAGGGTCCACGCTTGGCTGCCGCGTG  
CCCATGTTGGATTGCGCAACATGTTGGCATTGATGTTTCGTCTTCGCCACGACGGCCG  
TAAGCGCGGTGCTGTTTGCCGTGGTTTGATTGCCTACCTGGAGCACTTGCGAACTCA  
GTGCATTGAGCGCCGCCGTGTCTGCTTTTCCAGCCACTGCAGCGTTTCGTCGCTTCGAT  
GCGCTGGCCCAGCGCCTGGTCACCACTGACGCGAGCCTGATCCACGGCAGTCACAC  
CTGCGGAGGTGCGAAGAAGACCGATGCCGGACGGCATGCGCGCCTCCACCACGCCG  
ACTCGCTGCCCCATCACCTCATTGCGCCAGACCGCCGCCTCATCCACCGCAGTGACC  
CTTGCGGCAGTCTCCAGACCGCCGGTCCCGGAGGGCATGCGGGCCTCCACGGTACC  
GACGCGCCGTCCCAAGGCGCTGTCCGCGTTGGCACGTG

>CONTIG\_398\_length\_660\_cov\_19.885553

TTTATTGCTTACGCCAACATTGTTGCCTGCATGCATAGCATGCGATCGGTGGCGGAT  
AACTTGGTGCACCTAGTCTATTACGCCACCGGAATGAATCGCGATGCGGCGACCTGC  
ATCAAGAAAGAGCGGTACATTACGTGGGAGACTGTCCGTAAAAAGCTGATCCCAGC  
TGCCGTAAAGCGGAGTTGGATGCGCTACATGAGCATGCCGATTTCAGGTACCTCTG  
TGCGCTCGACAACCATTGCAAACACCGCAGCATCGTCGATATTGGCTATGCGATCAG  
CATCACCGATGACACGCACGGCATGCGCATCAAAGCCTTCACCCATGACGGGATCG  
ATCACGCTCACCAGTGGGTGAGACCGTTTCTAAAATCCGAATATCAACGTCAGGAAG  
CGGTGATCTTGCGAGCGGGCAATCATCTAAACGGCTACGTGGCGCAATGCCGCAAG

GACTGACGCCGTGCCACGCTTTTTTTGCTACGCACTGGGGCGTGTGGGTGAGCAATG  
GGAATGGCAAGCCGGCCAGTCCAGACCCGCTGTTTGTTCATCGGCGCCGACCAATAA  
CAAACACCGTGCCGGTTGCAGAGCTACGGTTTCCACACTGCAATCGGCGCGGGCAA  
GTCCTCGCCGAATTCGCTGTGGCGTGCAACAACCGACG

>CONTIG\_399\_length\_658\_cov\_14.967985

CGCCAACCGACCCCATGCACTTGGCGCTCCTTTGGACAATGCAGCGCACCAAGACTA  
TTGCAGGCGTCCAAGACTATGACGAGGAGAGCTACACCTCTACCATCCTAGGCGGA  
ACAGCCATAGCGGCACCATTTGCTCGCTGCCTTTGAAGGTCAAACCTCGGGCACCAAC  
GCGGATTTTCGGTTTGAACATTTTCGGAAGAACGGTGGGGCCAAATCGCCGTAAAGC  
GAGACTGCCACAGGTGCTGATTTTTGCCTGGTCATAGGCCATGACGATGAGCACGCA  
AAAGTTGCCATTTTTCAGGCCAAGAAATTAGACCCCTCCGAAGATGAGCGCCTTCTA  
TCTGTGCGAAGAGGACCCGCAAGCACGTCGGATGGGCATTTCCAATTCACCATGTTA  
CTGGCATTACCTGCCGGCTGATGGCCAAGGCTGGACTCTCTGGCTATGAAGATTTT  
GCCGACGACGCGGACACGCTGGGAGCAGCAGCAGCACTCAAGTCCATGTCCGTGGG  
GGACATAAGCATCCTCGTTAAAGAGATCAGCTGGGTGCACTACATGGTCTATCACAA  
TGGATCCGCAACGACTCTCCCCCTTAACCATCTAGACGAGGCATGCTTTCTGAGCGA  
GGTCTACAAACATCGTCAGTATTCGCATCGCCT

>CONTIG\_400\_length\_657\_cov\_3.115094

GAAGGAGTTGGCCAAGCTCCAGCGCCAGGCCAAACCCGCCAAGCCCAAGCCGGCCA  
GGAAGCCGGCCGGTGCGGCGGCGGCGGCCACCGCCGCGAAGATCCTGCCCAGCGAT  
CGGGCGCAGCTGAAATTGCGCGGCCTGCCGCGCACCGCGCGACGGGCAGCCACTCC  
CGGACAAGCCAGATGACGCCGACTCTCCCTGACCCGCTAAAGCTTGCCAGGAATCA  
ATCATGATCCTCGATAATCTCTCGCACATTGCGGCCGGCATGACTGTGGTGATGGTG  
TTGGGCTTGCTCCTTGCAAAGCGCAAGGGGCTGATTAGCGGTGATGCGTGCTATGGG  
TACTCGCTGCTTTCTATGGCGGGTATGAGCGGGTTCGTTGTCTTTATCCGCCTATTCT  
TCACATGAGCAGCCGCGACGACCTTGCTCAGGTGACAGCCGAGCGCGACGTTCTGG  
CCGGCTTGGTGGAGCAGCACGAAGCCCGGCTGCGGACTTTCAGCGCGGATCTGCAC  
CACGTGCTGTGCTGATGGCCAGCTCGGGGACCATGAGCCGGGAGCCAAGTACATG  
GAAGCATGGCAGCGCCTGTACGCACTGATCGCGCCCGTGGTCACTGGCTATGCGTCC  
ACATCCGCAGAACTAGAGCAAGCCCAGGCCGATCAC

>CONTIG\_401\_length\_654\_cov\_0.639469

GACGATCGGGAAGGCGTTGTGCCCATTCGCGAACTGGGTGTAGTACATCCCACCTAG  
GACGCATACCCGCATGGCGCCCTTTACCTGGATTGTGATTTCCAACTCCGTGATAA  
GTGAGTTCCAAACAGGAGTAAATCTCGAAATTATCAATGATTCGCCTAGTGGAATCC  
AGATGTCATCAACTACAAGGAAGCGACAAAAGAAATCCTCACTATTTAAATTTACA  
GCCGCCCTGATACTGTCCGCATGCTCTTTTAATCGCTTATAAAGAACTTTTCCGGCAG  
GTATCTCACTATTGGCGCCACACGTGCACCTGCGGGAAGTGCCTTACCGACGTAGA

TCGGAAGCATGAATTTCCCATTTGAAATTAAGTCGGGACACTTGTGCATAAGCACCAA  
AATCACCAGTGTAATAAATGGCATAAATGCCAGCACCATCAAAAGCAGATAGTTCG  
GCCAGCTGATGAACCTCCTTAGTCAGCAGATCCTCAGCAACACTCGCACACAAGTTC  
TTTTTGTCCAATGGGTAAACGGAATAACTTTAGCAGTCATGCGCGCTTTCTTTTTTT  
TTGTTCTTCTTTCTTTTCCCTTCTTTAGTTCCCAGCAATTGCAATTTGTTCTGCCACAC  
TAGACGCTACCCGTTGCGCCAAGAT

>CONTIG\_402\_length\_652\_cov\_363.641905

CGTGATGCGATTTACGGAAAGCTCCCTGTCAGTTTGGATACCATCCATGCGAACAGC  
AACGTGCCGATCCGCATCTTCAATCGTGAGGGCGTCGAGCTTTACGACAGTCGCACC  
GATGCACGCATGCCCCGGCCAAGCGATGGAAGAAGCGCGCAACGCGCGGCTTAAAG  
ATCCCGCTTTCACCGAGCATCTTCGAGAGGCTTGGCAAAAACAAGTCGATTGGCACC  
GTGACTTGCCGAACCATGTGCAAGAGATCCCGAAATCCGATCCTGCTGCCCAAGCA  
AAATTGCTTGAGGAGCATGCCAAGCTCCGGGTGAGCGATGTGGTTGCTAGTCGCATG  
GAAGGCATTGCCACCATTGATGAACTCGTGCGGCCAGGTGCTCCGCCTGCACGCGTG  
CCTGTGCCGGAACCTGAAATCCCAGGCTTGCCTCGCGCCGGGATGACGGCAGGGCT  
CGCGGGTTTGGGCGTTGCCGCTACCGCCTACGACGCGTCGCAAACCGGAGAACGTG  
TTGGCACGCTCTTGGCACAAGACAACCTTACCGCTGCGCGCTCAGAAGCGCTGCACT  
TTGGTGCCCGAGGCGTGGGCGGCTGGGCGGGAGGTGCCGCCGCGCTGCCGTTGTT  
GGCACAACCGGCGCCGGGCCCGTTCGCGCTGG

>CONTIG\_403\_length\_652\_cov\_13.636190

TAGACCGAACGGCGCACACCACGTGGGAGCTCAGCCTGAAGGCGTTTGATTAGCTGAT  
GTCGTATAGTTCTACTCATATGTTAAATGTAAAACACAATCTAATCACCTGTCATCCC  
AATGCACACTTATTTGGAAAAAATAGCCTCATAGTTGAATTTTCATGTGTAGATCTAA  
TCATACTCGGCTGGTATGCATTGCCTAACCAGCTGAATCATGTGTGCGCCGAAGCTC  
ATTGTTGGCCCCCATGCCCCGGGGAAAAGGCAAACCTGGACCGTACACATATCCCCCA  
AGATAGGTGACAGCCATGAAGACGAACCCTCAAAGCAGCAATCCGGAGAAGCTAG  
GTCGCTGGCTTGGCAACGCCTGGCGCTCATATGTCCAGGTCGAGCGCAGACTGACG  
ATATTCCTCTCATCAAAGGGCGTTCCAGTCGGAGCAGCGGTAGCCTTGTTTTGGTTT  
GTGAAGGCCGCGAGCAGTCGCGGTACTGCTCTACACCGCATTCTGGCTCACCTGTTG  
TTAGTGTTTGCGGTGCTACTTGCTCGCGGACTTGATACGCCCAGGGTTCCGTAGACA  
CTCAAGACCCTCGTTGCGCGTAGCGCCGTTCAAACCTCTACAGGGGACAGGTGCGCCA  
GTTGAACCGTGCGGACGGTTGGGGTTGTAG

>CONTIG\_404\_length\_652\_cov\_10.565714

GCGCAGCGCGGCAATGTCAGCATGACCAACCTGCAAGTGGTCAACGCCATCCTTTA  
CGTTGCCGAGCATGGCTGCAAATGGCGCGGCCTACCCAAGCGCTTTGGCAACTGGC  
ATACGGTCTACACACGCATGAACCGTTGGGCCAAGGCGGGTGTGCTGGACCGGATG  
TTCGCCCAATTGCAGAAGTCCCAGATCGTGCGCATCAAAATCGAAGCAGTCTCGCTG

GACTCCACCAGCGTCAAGGTCCATCCCGATGGCACGGGTGCATTAAAAAAAACGGC  
CCGCAGGCCGTCGGCAAGTCCCGCGGTGGATGGAACACCAAGATTCATATGGTTGC  
CGCAGATGCTCGAACAGCCATCACCTTTGGATTGACGCCTGGCAACGTGCATGACGC  
ACCTGCAGGCCGCGCGTTGCTTGAACACCTCGGGCCAGTGGAGCGGCCGATTCATTT  
GTTGATGGACCGTGCTTATGAAGGCAACGAAACCCGCCAGTTGGCGCTCGATCTTGG  
CTTCGTTCCGGTGGTTCCACCGAAATCCAATCGGGTCGAGCCTTGGGAATACAACCG  
GGAGATGTACAAGCGGCGCAACGAAGTAGAGAGACTGTTCCGTCGCTTGAAAGGCT  
ACCGCCGGATTTTCTCGCGCTTCGAGAAGCT

>CONTIG\_405\_length\_650\_cov\_131.355641

CAATGTCTAGCGACACGTTTCGGCATACTAGCCGCGTTGACGGCCGACCAAGTGATC  
ATCCCGGAGAAGAACGGCACGAAGTCCGAACCATTCACACATCGATCGTCAGCTT  
GTCCGTACCGGTCGGTGTGTCAGCACCTCTAGCCACAGGCGTGCGATCTGATTCATCGA  
TTCCAGCGGGACGCCGTAGATTTGAACTTTGGCGTTTCCAAACTGCGCACCGCCCTG  
CGTCACAGCGATCGACATGCGGTGCTCGTCAAACACGTAGGTTTGATCCTGTACGTT  
GCCCTGTGCGTCGGGACGCTGCACCTCCACAGTGACACGCGCCCGCCGAATCTGCA  
GCGGGTTCATCGGATCACCGTGTTGTAGTTCTGCGTGTCGGCGATGCGTTCCAGACC  
GCCGACAAACGCCTCGGGCTGTTGCGCCTGCACGGTCATGTTCTGGATGGTCACCGT  
CGTTCCCGCGCGCGCTGCGGGTGCTGTGCGGTGCTAGGCCGCTTGCAGCATCGTCGC  
GTCCTTACCGCGTCGGATGTCTCGGCGACGTTACCGTGCGCTTCGTAGTACTGCGA  
GACGGCACGGCCCTTGGTCGCGGCGTCGCCACCGGCAGCCAGCGACTTGGTTCATCA  
ACGCTTTTTTCGTATGGGTCTGTCATCG

>CONTIG\_406\_length\_650\_cov\_69.502868

CGATGACAGACCCATACGAAAAAGCGTTGATGACCAAGTCGCTGGCTGCCGGTGGC  
GACGCCGCGACCAAGGGCCGTGCCGTCTCGCAGTACTACGAAGCGCACGGTAACGT  
CGCCGAGGACATCCGGCGCGGTAAGGACGCGACGATGCTGCAAGCGGCCTACGACC  
GCACAGCACCCGACGCGCGCCGGAGCGACCGTCAATATCCAGAACATGACGGTC  
CAGGCGCAGCAGCCGCAAGAGTTTGTGTTGGCGGTCTTGAGCGCATCGCCGACACGCA  
GAACTACAACACGGTGATCCGATGAACCCGCTGCAGATTCGGCGGGCGCGTGTCAC  
CGTCGAAGTGACGCGCCCGGACGCCGAGGGCGTGGCCCAAGATCAAACATACGTCT  
TCGACGAACACCGAATGTCGATCTCGGTGACGCAAGGCGGTGCGCAGTTTGAAAC  
GCCAAAGTTCAAATCTACGGCGTCCCGCTGGAATCGATGAATCAGATCGCACGCCT  
ATGGCTAGAGGTGCTGACCCCGACCGGTACGGACAAGCTGACGATCGATGTGTGGA  
ATGGTTCGGACTTCGTGCCGTTCTTCTCCGGGATGATCACTTGGTCGGCCGTCAACG  
CGGCTAGTATGCCGAACGTGTCGCTAGACATTG

>CONTIG\_407\_length\_649\_cov\_9.750958

GATTCGCATCGGATCCACAACCTTCCTGCCGTTGGCGTCCAACGGCAGGAAGTTGTGG  
ATCCGATGCGAATCTCCCAAGTCCGTTGCGACCATCGGATTGCGTGCATCCAAAAGA

CTGCTGTCGTTGGCATAACCAGCCCTATCCAACGCAGTGATCTCATGCGACACGGCG  
TATACCTTCACCTGCCCATAGTGCTTACTTGACGACTCACGGCATCACCTGCCATC  
ACGTGATTGATTACGTCGTTGCCACCTTCCGGAATGCGCCGGTCCAGGCTGACCGCA  
CCATAGGCGTTGAAGGTCTCTCCCTTGAGGCCGAAGTGGTGGGCAGTGACCTGGGC  
GAGGTGCGCGCCAGAGAATGACCGGTGACGGTGACATCAGGAGCCGGTTGGCCGG  
TCTTGAGGTGCTTTTGTCTGCGTACTTCAACGCATTCTGAGTCAATTCGATCGCATC  
ATCGACCTGACGATTGTGACGTGCTGCAACCATGCCACCGTCAGCATAAGCACCATC  
CTGTTTCGGTTGACGATCAAACCTCGGTACCGCGATGAGCGACGATAATTTGCGCCGT  
TTCTATTTTCTCGTAGATAATTCCCTGATAGCCGGACGGGCGATCCATATATTCCAGA  
CGCCTGAACGAGACGCCGCCGA

>CONTIG\_408\_length\_648\_cov\_117.293666

TCCACACCGCGGATCTGGTCAAAGTGCTGGCGGTCTACCCGACCGAAGGCACCACC  
GGATTCGTCGACGTCCAGCCGATGGTACTGGAAGCCACGACCACCGGTGTGCTGCT  
GGAACAGAGTCCGATCTACAAGGTGCCGTATCTGCGCTTGACAGGGCGGCCTGTGCG  
CGGTGGTGCTGGACCCGGTCGTCGGCGACATCGGTGTGGCAATCTTCGCCGAGCGC  
GACATCAGCACCGTGATCAGCACGCGCGAGCCGGCCGGCGCGCCTACAGCGCGCGC  
CTACAGCAGCGCCGACGGCCTCTATCTGGGCGGATTCCTCAACGCCGACCCGACGC  
AGTATGTGCGTTTCGATCCTGAGGGCGGCATCGAGATCGTATCCACTGGCGACCTGA  
CGCTCTCCGCGCCTGGCGACGCAAGTCTAACGGTCGGGGGCGATCTGAGTCTACAA  
GTGACGGGCAACGTCCTATTGCTGCCGCTGCGACAACTTGGTCTGGCCCGGTGACA  
TTCTCCAATCCCGTAACGATGCCGCGAGGCGACCATTGGCGGGCGTGCCCTTCACCACG  
CACAAACACTTCGTTAGCGGCACCGGAACAAACAGCGGCACGCCTGTCACCTGACC  
TGATACCATAACCGCCATGGCTACCACAAA

>CONTIG\_409\_length\_648\_cov\_63.982726

TCCACACCGCGGATCTGGTCAAAGTGCTGGCGGTCTACCCGACCGAAGGCACCACC  
GGATTCGTCGACGTCCAGCCGATGGTACTGGAAGCCACGACCACCGGTGTGCTGCT  
GGAACAGAGTCCGATTTACAAGGTGCCCTATTTGCGCTCGCAGGGTGGCCTATCGGC  
GGTGGTGCTGGACCCGGTCGTCGGCGACATTGGTGTTGCGATCTTCGCCGAACGCGA  
CATCAGCACCGTGATCAGCACGCGCGAGCCGGCTGGTGCGCCTACAGCGCGCGCCT  
ACAGTAGCGCCGACGGCCTCTATTTGGGCGGATTCCTCAACGCCGATCCGACGCAAT  
ATGTGCGCTTCGATCCCGAGGGCGGGATCGAGATCGTATCTACTGGCGACCTGACGC  
TCTCCGCGCCTGGCGACGCGACCCTGACGGTCGGCGGCAAGCTCACCATGCAGGTT  
ACCGGCGCCGTCACGATTTGCGCGCAGTCGACGAGCTGGGCGGGCCCTGTGTCAATTT  
TCGAACCCGGTGACGATGCCGCGAGGCGACCATTGGCGGGCGTGCCCTTCACCACGCA  
CAAACACTTCGTTAGCGGCACCGGAACAAACAGCGGCACGCCTGTCACCTGACCTG  
ATACCATAACCGCCATGGCTACCACAAA

>CONTIG\_410\_length\_647\_cov\_30.751923

CTTGCGTGGTGACGGTTTCTTGGCCGACCTTGCTCATGGTCGAACCCGGCACGCGGG  
CTTCGGCATTGAGCTTGTTTGCTGAGGCCGGGGTCATGAAGCTGTAGGCCTCGCTCC  
ATGCCGACTTCACCACCACCGGATCAAGCGGCACGGTGCGCACCAGCTCCACCCAA  
TGTTTGAGGAAGTAGCGAATCTCGGCTTGGCCGGGCGTGTAGTTGGGACTCGCATAG  
CCCACGACCTGGGGGGCGCCATCGGTGTTGATGCGCGCAATGAGTGGCTTCGGCGG  
TGGCCGATTGGTCACGGCAATGAGGCCGCCAGCCAGCAGCACCGACAACGCGTAGC  
CGCCCACCGCTGCCCAGCGCCATGCGCGTTTGTGCTCTCCGATTTCTCTAACTTGTC  
GGTCCAGCCTTTGCGCGCTGAATCGTGGTGTGGGGACATCGGCGCCGAGCTGGGAC  
GCTGGCCGACGGGCGTTTGCAGTAGGTCTTTGGTGCTGCTCATGCGTGTTAGCTCTC  
GTCGTTGGTGGGGGCAATCGTCGGGTTCCCACTACCGCCACTGCTGGTGGTTGTGGC  
TCCTTTCACAGCCGTGGTTGTTGCTTTGGCGACCGTTGCTGCGTCGCTGAATCGCTGC  
CTGCCCCTTCCAGCCGTTCCG

>CONTIG\_411\_length\_645\_cov\_16.563707

AGATGACCCAATTGGCCATTCGCCTGTTGCTGCTGACGGGTGTACGCACAGGCGAAC  
TACGTTTGGCCACGCCGGACCAATTCGATCTGGAACAAGGTTTGTGGATCATCCCGG  
TGATGTCGCTCAAACAGCGCAAGATGCTGACCAAGAAGAAACGAAAGCGCGTAACT  
GACATCCCGCCCTACATCGTGCCGCTGCCTGTGCAAGCCATCGAGATCGTGCGGCAC  
ATGCTCGACCTATTCAAACCAGCGCAGACCTACCTTTTCCCGGGCGTGAAGCGAATC  
AGTGCCCGCATGAGCGAAAACACGGTCAACCGTGCGATCAAGCGGCTGGGCTATGA  
CGGTGCTCTCACTGGTCATGGCATCCGGGCGACGATTTCAACTGCACTCAATGAATT  
GGGCTATCCAAAGGTATGGGTCGACGCGCAACTCTCACATGCTGACCCCAATCGCAT  
CAGCGCCACCTACAACCATGCCGAGTACGTTGAACAGCGTCGGCTAATGATGCAGG  
ACTGGGCCGATCGGCTGGATCTGTTTCGAGCAAAATCAGGTTTCAGATTGCCAGCACGC  
ACCTCACCATCCACCTTCAGGGCGTTCCACGATTGCCGGTCAGAAGGTCACGCCGC  
TGCCGGCGTTGGGCCAACACG

>CONTIG\_412\_length\_645\_cov\_1.073359

GTGGAGGACCCGGTGGAATACGCCATCGACGGCGTCGGCCAGACCCAGGTCAACGC  
GCGCGTGGGCATGACGTTTGC GGCTTGCGCGCGATCCTGCGGCAGGACCCGG  
ACGTGGTGATGATCGGCGATTCGATCACGCATTTCTGGGCTGGCCCACCGCAGGCCA  
CGCGCGTGAGTGGCGTGCAATCGTGGCAGTGGTTGTACGGCACGCGGCCGGTGCTG  
AATCTGGGCTTCGGCTGGGACCGCACCCAGAACGTGTTGTGGCGGATCCGCCAGGG  
CGAGCTCGACGGTCTGGATCCGCAATGGGTGGTGTTCACATCGGCACCAACAACC  
TCACCGGCACCGCGCAGTCGCGCGCGAGCACGCCGGCCGAGGCCGCCAGGGCGTG  
GAGGCGGTGGTGAACGAAGTGCGTCGCCGCTTGCCCAACAGTAAGCTGATCCTGAT  
GGCGATCATGCCGCGCGGCCGCCAGGCGGGCGATGCGCAACGCGCACCGATCGCCG  
AGACCAACCGCTTGCTGGCCGCGCGCTATGCCAAGGATCCGTCAGTGCGTCTGGTGC  
ATATCGGCAAGCAGCTGCTGCAGCCCGACGGGACCTTGCCCGAGGCGCTGATGCC  
GACGGCACGCACCCCAAGTGAGGCCGGT

>CONTIG\_413\_length\_642\_cov\_18.052427

TCAACACCGGAAGCCGACAGCAGCGCGTCACCATCAAGGCCCGTGTGGTTGCAGCA  
CCACGGGTTCGGAGCAAAAGCCGCCATGCAGCGGCACGTGGACTATGCGCAACGCCA  
CGGCGTAGACAAGGACGGTGGGCCGGCCCGCCCGTTTACCGACACGGGCGAACTCA  
CGCGCGAGCAGACATCGCAGTTCGTGGACCGGGCAGAACCTGACCGGCATTTCGTTC  
CGATTCATCGTCTCGCCGGAAGATGGCGCGAACTTGAATTTAGAAAGTTACACCCGC  
GATTTGATGCAACAGATGGAGCAGGATCTAGGGACGAACTGGATTGGATGGCCGT  
CGCCCACCATGACACCGACAACCCGCACGTGCACATCATCGTGCCTGGGGTGGATG  
ACAAGGGCGGCGACCTGGTGATTAGCCGCGACTACATCAGCAATGGCATGCGTGAG  
CGGGCACGTGAGCTGGCAACACGCGAGCTGGGTTATCGGAGCGATATCGACATCTA  
TCGCTCTGCTGCGAAGGAGGTCACGCAAGAGCGCTGGACGGGTCTGGATGCGTCCA  
TGCTTCGGGAGCAGCAGAGCCGCGAAAGCGGCCTAATCCATGCCGGCAAGGTGCAT  
GCAGATCCGTTCCGCAATGCACAGC

>CONTIG\_414\_length\_641\_cov\_29.803502

CTTGAGCAAGGCCGCGATGGCGCAGGTGCTGCAGCGTTCGATCGGCGTGGAGCGCA  
TCGAGGCCAGCGGTACCGGCTGGACCGTCGCAAACAACGACTGCGTGGTGGAAACG  
CGCGGCATGGCCGACGATAGCGTCGACCTGATCGTGACCTCTATCCCGTTTCGCCAAC  
CACTACGAATACAGCCCGAGCTACAACGACTTCGGGCATACCGACGATAACGCGCA  
CTTCTGGGCGCAGATGGATCACCTCAGCACGCAACTGCTGCGGATCCTCAAGCCCGG  
CCGCATCGCCGCCATCCACGTCAAAGACCGGATCCAGTTCGGGCGCGGTGACCGGCG  
CCGGCGTGCCGACCGTCAGCCCGTTCCATGCGGAAGCGATCTTCCATTACCGCTCGC  
ACGGCTTCGACTACATGGGCCTCATAACTGTCTGTGACCGACGTGGTGCGCGAGAAC  
AACCAGACCTATCGCCTGGGCTGGTTCGGAGCAATGCAAGGACGGCACGAAGATGGG  
CGTCGGGTCGCCCCGAATACATCGTGCTGCTGCACAAGCCGCAGACTGATCGCAGCC  
GCGGCTATGCCGACGAGCCGGTGCGTAAGCAAAAAGCGGATTACACGCGGGCGCGC  
TGGCAGGTTCGATGCGCATGCGT

>CONTIG\_415\_length\_639\_cov\_0.796875

GTACGGGGTAGCCAGTCTTTGGCGTCGACTTGAACGTGCAGCAGCTGCAGCGCGTCG  
TCGCGCACGCGGTAGGCCAGCACGTACGGCGTCTGCTTGACCACCCATTTCGCGGGTG  
CCGGCGACCCGGCCGGCGCGGCCGCGGCCCGGTTGCTCGGCTAGGGTGCGGGTGGC  
TTCCAGCACCTGCCGCGCCATCGCGGCGGCGGCGGTCGGGTTGAGCGCGTGGTAGT  
GATCCTGGGCGTATGCAAGTTGCCTGGCGGCCGGGACGGTCCAGTCACGCCGCAAC  
ATCAACGCCCCATTTGGCGAACAGTGCCGTGACCTGTGCCGGCGCGGTAAAGGCTC  
CCCGATCTGCGGCGGCAATGCCATCCAGCACGGCGGCCTCGAAGCTGGCGGTGTCC  
ACGACGCGGACCACGTCTCCATCCTGCCGTCTCGGGCAGCGTGTGATCAGCGTG  
TGGGCTTCTTGCTTGATGGCGGACATGGCACTGCGGTGGGGGAGCTCTGCCGGCAAG  
TCTACCCGTGCGGCTCTGGTTCGCGTGTGGCAATAGCTGGCGCGCGGCTGGGGCGTT

CACTGGCGGTGGCAGGCAGGCCGGTCCTGCGCGAAGGTCGGTTGTCTGTCGCCATTG  
CCGCGCGCGGCAATGGC

>CONTIG\_416\_length\_637\_cov\_14.409804

CGGTAGGTAACACGTAACGCAGCGGCGTCGGGCAACCGGCGCCGTTTTTTTTGGCTT  
GCACCTGACCAGGTGCACCCGCGCCGCGCGTCAGCGCCGACCCCGCCCAGCTCAAC  
ACCCACGCCGATGCTAGGCGCGGCGCAGCCGTGTGCGTGTACGCCTCGCCGAGTCC  
GCCAGCTGCGGTACACCACGTCCCGACGAACGGCATGCAATCAACTGCAAATCCG  
GTTGCATGATAAGAAGAATAATATTATTATTCTTATCTACTAGGCCGCAGGAGC  
CGCACATGGACCCGTCCCAAGACGCACGTGATCGCATCTTCAAGGCTGCTGATGCGC  
TGTATGACCAGGCCGAGCGTGAGGTCTTCCCGACCGTCGATGCCGTGCGCAAGGCG  
GCTAAGGTCAACATGAACGAAGCAAACACCGTCATGAAAGAGTGGCGGCGCACGC  
AGGCGCGTCCGGCTCCGGCTGCCGTCCAAGTGCCCGAGGCGGTGCAGCAGGCCGCC  
GGCTCGGCGGTGGGGGCGATTTGGCAGGCCGCCAAGAGGCGGCCAACGACGCGCT  
GCGTGCAGCCCAGGCAGGGTGGGAAGCCGAGCGGCAGGAGGCGGAGGCACTGAGC  
CAGCAGATGGCCGACGCCTA

>CONTIG\_417\_length\_635\_cov\_11.368110

CAGCGGTCACCAGTAGTGAAGACATCCAACACGCACGGGAGCAGGTGCAAGCTTAC  
GCCCAGGCGTCTCCCGTGCCTGAGCTTGGCCAACGACAGATCGAACTTCGTTTCGCCT  
CAGGAGCGCGATGCCTACGAGCAAGCGTTGCGGGAGGCCAATCGGCAGGGCGTTTC  
CACGCAAGAAGCACAACAAGTCGCAAGCTTCGCAGCAACGACCGTCACCGCTCCGC  
GTGTGGATGAAACCCAAGCGCCTCAGGCAGCCATTGATGCGCAGCGGGATCGAGAC  
GTTGCACGCACACCCGACGCGCCTGCTGTTGCGGAGACGGCAACGCCTGCCTCGGT  
GTGGTGCCTGCATCCGTCAACGCGCCGCTGCCAGAAGACGTGCGCCCCGGTCGCCAA  
GCCTGCGGAACCGAAGCCCGAGTCTGTCCACAGCGCGAACCCCAAGAAACCCGAA  
CACCTGAGGTTGCCGCACCCCCGACAGCCGGCGCAGTCCAGCCTAAGGCGGAGGCA  
TCGGTTCCAACGGCGGCGAGCGCGTCTGCGCCGAGTGCCGGGGCCCGCATCATCCGCT  
TCGACCTCTGCCGATCAAGCGCCTACTCAGGCTACTGTGCCGACGCAGCCGCCGGCA  
TCAAGTGAGGTGGAA

>CONTIG\_418\_length\_628\_cov\_12.349301

CACCAGCCAGGTCGCCGACTTGGAACGTAAAGGCAAGCCCGAGACGCCCCCGCCGC  
CTGCTTGCTATCTCAATGGGCAACCCTACAGCGAAGGCGCTGTCGTGGCAGGACGA  
ATCTGTGGGACCGGCACGATGGTCTACAAAGACGGCCAACGGACGCCACTTGAATG  
GTTGCCCCATCGCACGAACCTGATGGCGCCTGCCCCGCGCTTTTTGCCCGCTTCGGC  
GGGACTTTTTTTGCCCGCTCAAACATTGAATGGTCCATTTAGGCTGGCCCATTTTATA  
TGGTCCGTTTGTGCTTTTCAGAAGACGACTGCACCAGTTCACTGGGCTGGCCGCCGT  
GTGTGCATAGAACTTCTGACCGAGAGCGGTGAGAAAGTCTATGCATGAAGCACCGCG  
AGAGGTCGGAATTGCTCAGAACTCCTATGCACGGCGCGACAAAGCGGGAACCGCCG

GAAATTCCGGCGATCAACCGGCAAGCTGCTTGATGCGCTCGGCCAGGCGGCCGAAA  
GCCTCGTTCACGTATTCCAGCACCTTGGGTTCTGCGCCCTGCGTGCGCAGCGAGTCT  
TTGAAGGCGTCCAGGTCGGACAGCCATTGCCGATGCAGGCGGCCAGCTCGTCGAG  
CTGAGGC

>CONTIG\_419\_length\_624\_cov\_2.158954

GCTAATTCCAACAACCTGGCGATAGGCCTGTTGGGTTCGAAGATGCTCACTGCCTTGG  
GGATACTTGCGAGCGATGCCCCGAAGGATTGCTGCTTGTTGATGTCCTTCGACCCCC  
GTCAGGATTGCAATAAAGCGTTCCTTGGTCGTGTCGCCGGTGAAGGCATCCGGATCC  
AGGTTCAAGGTCGAAAAGCCTGGGTAGAACTCTCGATGTGTCTTGTAGGAGAAATC  
ACCCAGGTAGCCGCCCTCAACGCCAATGTATTGGTGAACCACCCAGTGGATCTCACT  
GCTTCGCAACTCACCCACAGGCCCCCCTAAATGGCTGGAATACGCGTTATATTGAAA  
GCATTATAGTCAATGCGCGGTGTGGTGGCAGAAGGGGCATTTGACACCCGACAAGC  
ACCGTTACAGGGGGGAGAGTCGATGGACCAGAAGGCGGTAGCACAGGTAGGTGAAG  
AGGCTCCTTCGCTCCGGGGAGCAGGCTGCCTCAAAGACAAGGTTGAAAGAGCCCGC  
TTGGAGCTTTTGGATCTGTCGACGCGCAATCGCCTGCTCCATACACCCAGAGGCGGG  
CGTGCAAAGACCATTGAGGTTGTCCATGAGCTTGCCAAGGCGATGTATCAGACCTTG  
GT

>CONTIG\_420\_length\_621\_cov\_25.174089

TCACCGATGAAATGATCGAATGCTTCGTGGTCTATTTGGCTGGCCACAACCGCCCTA  
CGCACGAAGTACTGTTTCGGCAATGACAAAGACATCGCCGGGGAGTACGAGCGCGCC  
TTTCAGGGGCATGACGGAGACGCCTTGCCCGCTGGGTGTACTGCTGGAGACTCGTGCA  
CGGCTGCGGCAAGAGTTGCCCGCACGCCTCTCTGAGGCCCACCGAGGTTTCCTGAGT  
GGATTGGCGAGGGGAGAGCCCGAGTGGTCATTGCTGCAGTGTCCGTACGTTCGATCA  
GTTGCCAGCATTACGTTGGAAGCTCACCAACCTAATGACGTTCAAGCAGCGTCGGCC  
TAGAGATTTTCGCGGCGCAGGCCGATGTCTTGATGCTGCGCTCGCTGCATCCAGGAC  
CTGAGATTAGTCCGGCTGAAAGACCAAGCCAGATCCGCGTGGCCGCAGCGGGTAA  
GGCTGCTGGAGGCTAGGCATCGTGCTTGTCCGGCATCGCGACACGGGTACCTGTCGC  
GATGCCCCAGAATGATCAATGTGGGGGCTTGATCGCAGACAGTCGATCAGGCTGGC  
AAGGACATGTCATCCTCGTGCTCTGAAGGCGACTGCTTCGTGCGAGGATGGGTAA

>CONTIG\_421\_length\_615\_cov\_0.723361

TCGCGAAATTTCCCATCCAGCGGCACGAACTAGCTATACGCCTGCTTGGCGCGATCG  
TCCGGTTGCTCATGCGAATAGACGAACGCGCGCCACATCACACACCGCCATGCGG  
CGCCAGTGCATCGGCCAGCAGATTCGCGCCATCGGCATGGCTGCGTCCGTAATCCTG  
CGGGCCGGGCTGGCCTTCGGAATTGGCCTTGACCAGGAAACCACCGAAATCCGGAA  
TGCGCGCGTAAATCGCGTCAGCTGTGTCGCGCCACCACCGCTGCACTTGCGGATCCA  
GCGGGTCGGCGGTCTTCAAACCACCGATCTCGATCGGTGCACTGAAGCGCGCGCTG  
AGAAATACACGAATGCCGTACGGCCGGAACACCTTGGCCAGTGCCGCGGCCTTGTC

CAGGTATTGCGGCGTCAGGCTCCATGCCTTGGCATTGACGTCATTGAGCACAGTGCC  
ATTGATGCCCAGCGATGCATTGGCGCGCGCGTAATCGGTGTAGCGCGGGTCCAGAT  
AGCCGGGCAGGGTCTGCCAGTTCCATAACGAGGCACCGGCATAGCCACGCTCGACC  
ACGCCATCCAGGTTGTCCCAATGATTGAGCATGCGCAGCTGCAGCCGCGGC

>CONTIG\_422\_length\_613\_cov\_16.763374

CGTTCTGGGCACTCCCTTATGGTTGCCAGCGCGAGAGAGGGGCGAAACGGACGAGCA  
GCGACATCGCCGCGAAAGCCAACTATCCAAGCTCAGAGCGGCCTACGGAAGCGAGC  
TCACGGGGACCAAGTTTGGGCGCAACTACAACGAAGCCATCTCGGTTTCGGCTGGAA  
GAGATTGAGGGACGCTGGTGGTGCGGATTTGACCCCTACACCGCCGTGGAAGTGCC  
GCGTGATGAGCGGGCTGCTCCTTTAGACGCCGCCGAGAGCGACCCACTGGCTTGGTC  
ATCGCAGCGCCGGCCGGATCCGACCGCTGACTGGAGAAGAGAGCGGTGGGCCATCA  
AATAACAACAGCGCTTGGGCCAACATCATCGACGCGTGGGCGAACTTGCTCACGTCTC  
CACGAGGCATCACCTTTCAAGCGTTCGGAATCGAAGCTCAGGAGGGAGTCGATGCG  
GATTTCCGCATTTACCACTCACCGGCTTCAGTCGCCCTGGACATCACGACAAATAC  
TTTGACCGGAGACAGTGATGGTAGATGTTTCTCGCTCGCAGCTACCGCCGCTGTCCC  
TGCTCTCGGAACCGGAGCTGGCCTTTTCTCCTGAACAATCCGGGGGGCG

>CONTIG\_423\_length\_605\_cov\_11.177824

TCACCAATTTGTTCAAGCAGCTTCGGGCAGAGCATCCGGGTCTGCGCGACATGGGCA  
GTCAGCCCGAAACTATGGGCAAGCTGCTGACTTCACTGAGTAATGTCATCGACAGTC  
TCAATCCAGCTCGCAATCACGGAAGCTTGGCGCATCCAAACGAGACGTTGTTAGAA  
AACGATGAGGCAGTCCTTGTTATCAATGCGGCCAGAGCAATTTTCCAGTATTTGGAT  
AAGAAGTTCGCTAAGGACCTATCTCGCCCCCAATGACGGGGTTTCTCAGCAACCAC  
GAAGCCGAGATCTGCCTGTCAGTGTTGCCAATCTCATCCAGATGCATAAAGCGAAA  
GTCTTGGCCACGAAAAAGAGCCCCGCATGGGGGCTCCTGTGTCTGCTGGCGTTGAAG  
CCTCAGTCTCAGCGCCGGGTGCCAACGGCTGGCGGCGTTGTTCCGATCACTTGGCGG  
GAACCTTCCGCGACGATCGTAGCTTCCAGCCAAATGCCTAGGCGCACCATCAGTCTG  
CTGCGCGGTCAACGGTCAGAAATATCTGAGCCATCATAGACTTGGCTTCGGTGGCCG  
GAACTTCAACTCCCAATGCCCTGCCCCACCCTCGGCCTG

>CONTIG\_424\_length\_604\_cov\_411.366876

TCGCCAACATCGATCAGCTGCTCATCCAGATCGAGCATCACATGGAAGCTGCGTTTC  
TCAGTCAATGTGCAGAAGCCTGTGCCTTGCTGAGTCAAGCCCAGAGGCGTTGCATT  
TTAAAGCACTCATTGCGCGCTACTACCGCGAGCAACAGCGCATTGACTATGCGCTCG  
ATCAGCCCACAAAGCACGATGAGCGCCACGATTGGCTCTCCGACCACGTCAGAGGC  
AAAGCAAGCTACGGGTCTCCTGTTGGCGAGGAGATCGCGGCGCTCCTGCGCGCACT  
TCCGAACGCAACTCTCCATCTTTGTGCCGCCAACCGCTGGCTGAGACCACGACCACG  
CCTTTCTATCGCGTCTCCAAACGCCGGGCGATCAAGCTGGTGCGGTGATCCTTGC  
CGATCGGTGCTCGGGACCCGAGAGGGTCTCGGCCTTTATTGCAAACGAGGTGCGGGT

CTCGCGCCGTGTTTGGAAAGGCATACCGTCACACTGGCTTGTCTGGGCTACGCAAG  
CGATCACGTGTCCACCGCCTTGTATTTCTTTGATACGCATCGTATGGCCTATACAGTC  
CAGCTGGAGGGGCCACGCGTGCGTGGGGGAACACT

>CONTIG\_425\_length\_601\_cov\_51.411392

CCCTCGTCGCCAAGGGCATCAACCCGCGCACCGACCGAAAGCAAAAACGCCAGGCC  
ATCCGGTTGGCTGGCGAAAACACCTTCATGGCGGTCTACGAAAAGTGGATGGAACA  
CCGGCAACTGACCCTGGAAGAAGGTCGTCAGAGTTCGCTGGAACAGATCCGCCGCG  
TGTTCAAAAAGATGTATTCCCTTACCTCAAACGCTACACCATCTACGAGATCACCC  
GTCCGGTGCTACTGGAGGTGATCGGCCGGATCGAGAAACGCGAGTCACTGTCCGTC  
GCCGAAAAGGTGCGCACCTGGCTCAAGCAACTCGCCGACTACGCCATGGTGGTCAT  
TCCGGGCATGGTCGAGCACCCCGCCATCGATCTACACGTGGTCGCTGTGCCGTTGCC  
GCCCCGTTGAGCACAACCCATTCTGCGTATGCCCCGAGCTACCCCTGTTTCTGCAGAC  
ACTGCGCAAGTACCGCGGCATGCAGATGACCCAATTGGCCATTCGCCTGTTGCTGCT  
GACGGGTGTACGCACAGGCGAACTACGTTTGGCCACGCCGGACCAATTCGATCTGG  
AACAAGGTTTGTGGATCATCCCGGTGATGTCGCTCAA

>CONTIG\_426\_length\_600\_cov\_55.720930

GTCATGCCCTGAAAGGCGCGCTCGTACTCCCCGGCGATGTCTTTGTCATTGCCGAAC  
AGTACTTCGTGCGTAGGGCGGTTGTGGCCAGCCAAATAGACCACGAAGCATTTCGAT  
CATTTTCATCGGTGATCCCGCCCGTTTCATACATCTGCCACGCGTCGAACAGATCACG  
CGGATGCTGACGATCCATCGCGGCTACCAACTTCCCTGCATAAAGCTCATCCGGGGC  
TAGGGTGGGGACGTGCGAACTCGACTCCAAAACGGTCGCGCGTCCTGGCACTCAATG  
GCAGTCGGGTAAATCGGAAGGACGGATCCGCGAAACACCACGTTGACCTCAACCTTT  
ACCTGAGTGCTGTCATTCTCAGCAATCAGCTTCGTGTCGCCCAAATCTTTGCTGTGTA  
TCAGTCGTGTTTGCACACCCATGGGTGCAACACGCTCTGCGATCGCAGCCAGCTCTT  
GGTTGATTGCTTGAAGTGCTTGATCACGGGGAACCTTGCCAGGGCAGGTACACCACAT  
CGATGTCGACGGAAAGGCGCGGCATATCCTGTACAAACAGGTTGATGGCGGTGCCG  
CCCTTCATGGCGAAGATGTCATTGGCGAATACA

>CONTIG\_427\_length\_600\_cov\_24.959831

ATGCAAGCATGCAACAAGGCATCTATCACGCTTTGGCTTTCGGCTTCCTCGCGGCTT  
TGGTGGTCGTCTTCTTGGCGGGGGATGCCTTGGGCTTCTTGGGCGCGTGTAGGTCCA  
GGAATGCGCCCAAGTGCGGCACGTGCGCCCCGCTGCTCGTCGGTCAAGGTCACGCCCT  
TCTCGGCGGCCAGCTTCTCCGCGTAGGCCAGCTGCTTATCACTGGGCGGCAAATTGC  
CGTAGGTGGCGCTGTGGGCATCTAGGAACGCCTGCACGGCCACGTGGGAGCTGACG  
GCGTTGGCCGGCAGCGGGACACCCAACCTCCATTGCGATGAGCTGGGCATAGCGCAG  
CTGGCCTTCGCTGGGCACGCGGTTAGCGGCAGCCTTGGTCGCATCGCCCCGCACCGC  
ATCGATGATGCGGGTGACGTTGGCGGCGACCTTGGAACGAACTCGTCGCGCGCTTC  
GATCGGCACCAAGCCACGCCGCAGCTCGTCCAGCTTTTCTCCACAACGCAGTAGT

GGCGGCGTCGGTGATCGGCGCCGGCAGCATGGCAATCAGCTCACGCGCCAGCGGCG  
TGCTGACGATGAATTTTCCCTTGGACTCCAGGT

>CONTIG\_428\_length\_600\_cov\_16.080338

TTTCCCTGGCAGTATCGAGCCGGGCCTTGGCAACCGTATGCTGTCAGAGGAACGTAT  
AGAGGAACTGCGCTACCGCGAGCAACCAGACCAGAACCGTGAGCCAGAGCGCAAC  
CCGGCTAACGATCCAGCACACCAGAGTCATCCGGATCACGCTTTGATGCAGCAGAT  
ACGCAAGAAGATCGAAGGACTAAACGGTTCCGGCTATTTGCAAGCTGCAGACACTG  
ACCGCATCAGCGCCAGTGTTTACGCGCTCGCCAAGCAAAACAATTTTCAGTAGTGTTG  
ACGAAATTGCACTGAGCAAGCAGACCAATGCCGCAGCGGCTGGCGAAAAAATATTC  
ATTCTGCAGGGGCGCTTCAGACAATCCTACAGCCCTGCGCGCTTACATGCCGACTCAG  
GAGGCGATACAGACGCCAGTTGAGCAATCTTTCGAAAAGGTGAGAGAACTGCAAAG  
CAGTGAGTCGGTAACGGAGCGCGCGCAGCAGCCTCCACACCAGATTCCGGAGCAAG  
AAGCTCGGCAGCGGCCGACTGTGCCCTCTCTGTAGCCTCTTTTTTTTCAGATAGCAGC  
GATGCACGAAAACGCCATAAACGGTCTATCAAAACCC

>CONTIG\_429\_length\_600\_cov\_14.152220

TTGAGGTCAGCTATGAATTGCTCCTTGTCAGCCTTGAGATGCTCAGGCAGTCCATCT  
CCACCATTGATCCACATCAGTCTCCAATGGGACCAACCGGGCTGACCTCGCGCGCCT  
CCACCGTCGACCAAATCCAGTCTCAGCGTCAGGAGCTCGCCATGCCAATAGAAGGA  
GAACTTTGCCTGGTTTCTGACCTCGATCTCGGTTCCGCCACCGTTTGCAGCATTGCGC  
AAATACAGGTCGCGATCACGATCGATTGTCCAGTCTCTTGCAATTGGTGCCACCGACC  
ACAAAGTCTTTGTGCGATTGCTTCCAAGTCGATTTTCGCAACATCCGGCTCAGGAATA  
TATTCATTTACAAATGGCATCTTCGTTTCCCGGCATGGCTTGAATTTGTGGTTGAGAG  
CTATTTCTATGAGCCCGAGACGGCGGCAGACAGCTTCTTCACCTCGGCTTTTGGTAG  
CAGCCGTTTGGTGAAATAGGCATCTTCGTAATACTTGATCTTCTCGCAGAGCACCGG  
GCTTGGGATGCCTTCATAGAGGAAGACTTCCTTGTCAAAGCCCATCGCCTTCAACTC  
TTGCGGCAGCATCAAGGCGCGGCGCTGCT

>CONTIG\_430\_length\_599\_cov\_4.713983

TGAAGATATTGTCGCGAGCATTATCATTGAATTGATCGATAGCAAGGCGGCCGCCAT  
CGGGGAAGTTGTCGATATCTTCTTTTCGGATAGCGTCCTTTCCAAAAGTAAGTAACTT  
TGGGGGCTGAGCTATAAATTTCACTCTTAAATAGCGCTGGCTGAAAGCGCGTATCTT  
CGTGCTTACCGGTTGCTTTCAGCGAGATGCCAACTCCATTGAGTTCAAAGCTGCACA  
TCCCCTTGCCGTAGTAGTCAGCATCGATCATGCCATCGGCATAAATCTTCGCCACGT  
ATGTGGTGTGCTTGACCTTTTCGAAATTGATGGGAATCCCATCTTCTTTCTGCTTTGT  
GGACATGCCCAATGAGCGATCGATGGGTGTGCACGCATCGCGATTCTGCATCTCATA  
GAACGCAGTTCCCGATACCCACTCAAACGGTCCCGGCGCATCCTCGATGGTCATCGT  
GATCTGGTACGCCTGTGTTGGATGCGGGTTCTTGCGGTAGACCGGATCGCCGTCGGT

GGTGGTCGCGTCAGTACCGTGTCTTTCAGAGCCAGCATTTCATGGGGTTGCATCCTGC  
TAAGAAAACCAAGACAAGAGAGCAAGCA

>CONTIG\_431\_length\_594\_cov\_0.925054

GTACTCCTCGGCGTCGAGTTCGATCGGATTGACCGGCTCGCCGTCGAGGTCTGTGAT  
GACATGGCCGCAGTCCGGGCAGGCTGCCACGTGCGCGTGGCGGGTGCGCCGCCGGG  
TGAAGACGGACCGCCAGTGGAAAGCCCATCCGCATCCGCACACGCCCAAGGACGAAG  
AACTCCTGGCCCGTGGGCTGCACACCCAAGTCTCGCGCAGTTTGATGAGTTTGACC  
AGCGTGTGCGGGCCGTTGAGTACCCAGACCCTGGCGCCGGCCACTGTCTCCTGGATC  
TCGCGCCGCCACTTGTAAACCAAATGCGGTGGCGAAAGAACCAGGGTGCGGCGATA  
GCCCTCGGCGTTGAGAACGGCGGCCGTGGCGATGCCGACGGTCGTCTTGCCGCAAC  
CCATCTCGCCGTTGACGATCGCGGCGCGTTCGCCACGGTCGATCAGCAACTCGGCGG  
CGGCATGGACGACTTCCGCCTGGGCCTCAAACAGTTTGCGCTTGAGGCTGGCGACG  
ATGAGCTGACGGCGCGTTTGCGGCTGACCCGTATAGACCGGCGGGTTGGCGCGATT  
GAGGGAGTCGAGCAGTTCGTGCGCCGAAGTC

>CONTIG\_432\_length\_593\_cov\_36.075107

CTTACCTTGGCTAGGGGGACTACCAAATTCGCACTCCCGCCCTCCACATAGAAATTG  
TCTTTAAGCTGAGACTTTTCTGAACATAGAGCCCTAGCAGCACTCTCTCGCTGGTCAT  
TTGAGCGGGCCTGCCCCGACCGTTAGGCCGGCGAGCGTAAGCACGCAAATCGAATTT  
AAGGCAAACCTAACTATGGACATCGAAAGCACCTTTTAAACGCGAATTTAAATCA  
AGGGGTTGGAACAATGATAGTCGGAGTTACCTCACTATATCCACCAACAACCTTTGT  
ATCACTGGGGCCAAGCACGCCTATGCTGAGATAATTTGCAACGCCCTCACAATATC  
ATTGGCAAATTTCTCACTTTGATTAACTCAGCATTGGTAAAACCATCTTGATAGAG  
GTTTTGGTAAAGGGTTCGAGCAGCTGCTGCGTTATGTGCTAGCTCATGCATCACCAA  
GAAATTCGCCCCCTCCCATTAGATCGGAATACCCCTTGATGGTGTCAATGTTTATTGAT  
ATCTGTGGGTGCGCGTTGTTATAGTCGGACTGCCCAGTCGCAAACCCATTACTATAG  
CTAGTGCCCGCTTCGTTTACCTT

>CONTIG\_433\_length\_593\_cov\_16.781116

GCCAGAGCACAGCGGCGCTTGGCGCGAACGAAGAGGCATGTCTCCCCGCGCATCCA  
AGCGATCCAGCAGGGGCGGATCAAGCGGGCTCGAAAAGCGATGGTGGAGGCGGCT  
GAGGCCTTGAGAGAAGAGCTTCTCTCCGCAGCCGATTGAGGTGCTGACGCCTGAGGC  
GTCTGGAGAGGATGCACATCCACCGCAGGCCGAGGGTGAGGCAGGGCATTGGGAGT  
TGAAGTTCCGGCCACCGAAGCCAAGTCTATGACGGTTCAGATAACTCTGACCGTTAA  
CCGCGCAGCAGACTGATGGTGC GTTGGGGGTGGTGAGCCCGAAGCTAGGGTTGTCTG  
CAAAAGGTTCCGCAAATGATCGGAACAACGCCGCCAGCCGTTGGCACCCGGCGCCG  
AGACTGAGGCTTCAACGCCAGCGACACAGGAGCCCCGCATGCGGGGCTCTTTTTTCG  
TGACCCAGATTCTACTACGCGCGTCTGGATGGGGTCAGGGGCGGTGCTATACAGATC

TAGGCCATGGCCTTTGCTTTGGTAGAACTGCATCTGCCAGTTAACGCGTGCCTCCCG  
TCGATGGTCCCGTCATAATTGTTGCTCGGG

>CONTIG\_434\_length\_584\_cov\_1.247265

GATGGAGAGCGTGTCCAACGCCAGAATGCGATCGGGCACGGAGGGGCGCGCAGC  
AATCGCCATAGCGCCATCAGCATGGCCAGACCCACCGCGTGCATGCAGATGACGAT  
GGTCGATTTCGATGAACATGTGGCCGGTCACGGAAAGATCTCCATCAGGGGCTTCTCG  
TAGCGGGTCTTGATCTCGGCGATCAACGCGTCCGGATCGTCCAGATGCAGCACGTGC  
ACCAGCAGATATTTGCGGTTCGTCCGAGAGCGCCGCCGACACCGTGCCGGGGGTGAG  
CGTGATCATGCTGGTCAGCGCGGCGATGCCGTGGATGTTGGCGATATCCAGCGGCAC  
CCAGATGAAACCGGGATGGATGCGCGACTCCGGGCCGAGCACCTGGCCGGCCACCT  
TGATGTTGGAGCGCACGATATCGCCTGCGGCCACCAGCAGCATGCGCGGCACCGAA  
CGTAGTGAACCGATCTGTGCGAACTCACGGTCCAGTCGTGCCGCGAAGATCGGCAC  
CACCCAGCCCAGCAACAAGCCGAGCACCCACTGCTGCGGCCCCGAAGCTGTGCTGA  
GCAGCAACCAGAACACGAACAC

>CONTIG\_435\_length\_584\_cov\_0.365427

CGGCACCGCGCGATTGGAGGTCTGTTGATAGCGGGCGTCTGCGGCCAGATAGACGA  
AGCCGTGCTGCCCAGCGCCAGGCCCTTGCCGATGCTGGCGCTGCTGCTGTCGCCAT  
CGGCGCGGTTCGATGTTCTGTCCCCACAGGATGTCGGCCTTGCCGCCGTCGGCATCGG  
CTTTGCGCCGGCTGTTGCTGCCGCCAGCGCTCGCCTCCTCGCCTTCTTTCTCCTCTTCT  
CCTTCTCTCCTCCCTTCTCTTTTTTCCCCTCCTCCCTTCTCCTTTCTTTTCTTCTTTCTT  
CTCCCTTCCCCTTCCCTTCTTCTCCCCCTCCTCCTTCCCCTCCTTTTTCTTCTTCTCTCCC  
TCCCTCTCTCCCCTTCTCTATCCCTTCTTTTCTCCTCTTCTTTCTTCTTCTTCTTCTC  
CCCTCCCTCCTTCCCTTCCCTTCTTCTTCTTCTTCTTCTTCTTCTTCTTCTTCTTCTTCT  
TTCCCCCTCCTCCTCCTCCTTCTTCTTCTTCTTCTTCTTCTTCTTCTTCTTCTTCTTCTT  
TTTTCTTCTCCTTCTTCTTCTTCTTCTTCTTCTTCTTCTTCTTCTTCTTCTTCTTCTTCTT

>CONTIG\_436\_length\_583\_cov\_0.710526

GTGTGTGCTTTTTTGTGTCTAGCTTCTTTCACTTAACACAATGTTTTTGGGATGCATCC  
ATGTGGTGTGTTTGTGTTTTCTTTGTTTTGTTTTGTTTGAGATGGAGTCTCACTCTGT  
AGCCCAGGCTGGAGTGCAGTGGCATGATCTCAGCTCACTGCAACCTCTGCCTCTTGG  
GTTCAAGTGATTCTCCTGCCTCAGTCTCCCCAGTAGCTGGGATTACAGGCACCTGCC  
ACTGCACCTGGCTATTTTTGGTAGTTTTAGTAGAGACAGAGTTTACCATGTTGGCC  
AGGCTGGTCTTGAACCTCCTGACCTTGTGATCCACTCGCCTCGGCCTCCCAAAGTGCT  
GGGATTACAGGCGTCAGCCACTGCGCCCCGGCCACAAGTAAGGGTTTTAAAGGCAGG  
GGTAAATTTTCAGGAAAACAGAAGTTACAACAACATTGTGAACTGATACATTGGTTTTG  
GCCTAAAAAGGTGGGATAGTTTGAGGTAGGAGATTACCGGTCATAGGTATATTCAA  
AGACTGTTTTGCAATTGATGAAAAAAGAGTTTGTTTAAACATTTGGGGTCAGCAGAA  
AAGATTATTAG

>CONTIG\_437\_length\_582\_cov\_0.802198

GCTTTGCGTGGCCGGGCAGCGTGCGTCCGGTGTTGAAAGGTCTCGATCTGACGCTGG  
CGCCTGGCGAGCGTATCGCCATCAGCGGCGACAGCGGCAGCGGCAAGAGCACCTTG  
TCCGCACTGCTGTTGCGGCTATGGGATCCGCAGGCGGGGCAGGTGACTTACTCCGAT  
ATCGACCTGCGCCACGTCGCGCAGACGCAATGGCATCAACGCATCGCCTGGCTGCC  
GCAGAACGCCCCGGTGTTTGCCGGCACGGTGCGCGAAAATCTGCTGATTGGCGATG  
CCAGCGCTAGCGATGCCGCGATGTGGAGCGTGCTGGAGCAAGTGCGGCTGCGCGAG  
TGGGCGACGGCGCAAAACGGCCTGGACACCTGGGTTGGCGAAAATGGTGCAACGCT  
CTCTGCCGGCCAGGCGCGCCGGCTGGCACTCGCACGCGCGCTGCTGCGCGACGCAC  
CGATCCTGCTGCTGGACGAACCCACCGACGGCCTGGACGTGGACACCGCACACGCG  
TTGCTGCTGGATCTCTCCGCTGCATTCGGCGAGCGCAGCCTGGTGATGATCACCCAC  
GACAGCGTGCCGGCCGGTG

>CONTIG\_438\_length\_581\_cov\_17.878855

CAGTGATTTTCCAAGTGCCGCCCATCTTGGTGAACGAGTAAACCCCGTCCATCTGAT  
TGCCAAAGTCGCGATCCATGGCTCTGACCTTGGCCGTTACGTCACAGGTGTAGCTGG  
GCGCACCTTCCGCCTTCGTGCACTGGTTGCTCTCGAAGTCTTTGATGCGCGCCTTTTC  
GTTGCTGTTGTCTTGGACGAACAGCAGGAATGCATGCTCTCGCTCAGACTGCGAGGG  
GCCACCGGAAGAGCAGCTGGCCAAACAGGCCGACATTAGGCCAGCCAGCGCCAAG  
CAAAGCTTTGACATGTGCATCTCCAAAAGAAGAAGAGAAAAGCGCGTAGGGGTCCA  
CCAACCTGGCAGCTTTGGAGAGCCCCGAATTGCCGGCATGCTCAATGACTGGAAGC  
CTCCGCACACCGGCAGGAATGACCGGTGTTGATGCTTGGCAGTCGCAGTTGATTGGC  
TGACGGAACCATGTTACTGATAAAGTAACAGACAAGGCAAGTCGGAGACCTCATGC  
TCAAACACGTCATTGCATGCTTGTGGTCACATTTTGGATCTGGACGACGCTCGTCTC  
ATCTTCGCCAACCGC

>CONTIG\_439\_length\_581\_cov\_10.447137

TGGCGATGGTTTTTCATGCACTGCGCTCCTGGTGGAAGTCGCTTGCTTGAGGGCAAGT  
GTGCAATACCTTAGCAACATGCATGCACGCATGCAAGCTGCTTTAGCTGCACGCATG  
CTTAGCTGCACGCCAGCATGCATGCTAGCTGGCGCCGCGCCCGCGCGGCTTGGCCTG  
ACCGGTCTTTGGCGAGGCGGGCGAGGTGGCCACCGACTCAAGCGCTGCAAGCCGAC  
CCCGTAAGTTCGCTGCGTCCTCGCGGGCTTGGCCGGCAGCGTTGCGCTGCTCGGCTG  
CAATCAGGTGCGCCCGGTCCAGCTCGGTGCGTAACTCGCTGGCGCGGGCCTCTGCGG  
TGCTTGCGCGCTGCTGCAGGTCCACCAGCTCGGTGCGCACCTGGTCAAAAGCGGCCG  
TGTGGGCGACTGCGGCCGAGGCAGCCTGCTGCATGGCCGTATCCAGCTCGGCAATA  
CGTGCTTGGGCCGCTTCCAACCTCAAGCGCCTGGGCTTCGTAGGCGTCGGCCATCTGC  
TGGCTCAGTGCCCTCCGCCTCCTGCCGCTCGGCTTCCCACCCTGCCTGGGCTGCACGC  
AGCGCGTCGTTGG

>CONTIG\_440\_length\_579\_cov\_49.128319

GAAGCGCAGCGCGACGCCATCGCCATCCGCAAGACCACCAGCTCCACCGTGCAAGTT  
CAACGAGGCCTACCTAGCCCACCTGGTCAATAAGCACGACCAGGCGCAGGCCTCCA  
AGCCGGCAAACCAACGCACGGCATCGCCCCTGCAATGGGCGCTCGACTTCGTGCGC  
TCCGTTGATAGCAGCCCCCAGCACCCAGCAACACCACCGTCCAAGCCTAACCCCGC  
ATGGAGAACGCTATGACCATTCTGTCGCGTCACCGCAGCACTACCGTCGCCATCGGC  
ATCGCTGTTGCCGGCGGCACCGCCGTTTATGCCCCCCCCGGCGCAAGCGTTGGTGTGC  
GCCAATTGCAGCAACCTGGTGACCCAGCTGTTGCAGCAGAGTCAGGAAATTTTCGGC  
CTACGCCAAGCAGGTGCAGCAGTACAAGACCCAGATGGATCAATTGAACTTACAGA  
TCCAGCAGGTTGCCAACGAGGGCCGCAATCTGGCCTCGCTGCCGCGCAATGTGTTGC  
GCGAGTACCAGCAGGTTTACAACCTCTATAAGCAGAGCATCAACCAGCTGCGCGGG  
AGCATGGCGAAGCTG

>CONTIG\_441\_length\_577\_cov\_0.211111

CCCCCTCCCCTTCTCCCTCTCTTTTTCTCTCCCTTCTCTCTCCCCCTTCCCCTTTCTCCC  
TCCCTCTTCCTTTCTTTCTTCCCCTTCTCTTCCTTCTCTCTTCTTCTCCTTTCTCTCCC  
TTCCTCCTTCTTTCTCCTTACTCTTTCCCCCTTCTCTTCTCTCCATCCTCTTCTTCTC  
CCTCACCTCTTTCCCTCCTCTCACTTCCCCTTCCCTTTCCCCCCCCCTCCCCTCTTTTTACCTC  
CCTTCCTTCCCTTCCCCTCTTTCTTCTTCCCCCTCTCTTTTTCTCCTCCTTCTTCCTTTCCCTC  
CTCTCCTCTTTTCCCCTCCCCTCCCCTCTCCCTCTTCCTCTCCTCTCCCTTTCTTCC  
CTTCCTTCTCTCCTCTTCCCTCTCTCCTTTTCCCTCCCCTTCCCTTCTCCCTCCTCCCCTTCC  
CTTTTTCTTTTCCCCTCTCCTTCTCTTCCCTCCTTCTCCCTTCCCCTTCTTCTTCCCTCTTTCC  
TCTTTTCTCCTCTTCCCTCCCCTCCTCTCTTCTTCTTTCTCCTTCTTCTCTTTCTCCTTTTTT  
CTCTCCCCCTTTTCTCTCCTCCTCCTCTCCCTTTC

>CONTIG\_442\_length\_571\_cov\_10.813063

TCAAGAGTTCTACCTTAGCAATCGAGCGTGGCGTGCTCTTGCTGATCAGAAACGGAT  
TGCCGTGCTCACGCTTGAAGTGGTCAATTGGCGTCTCGGGATGCCGAGGTAGAAAT  
CCGCCATGGCTTGGGTGAAGCGCGTCGTGCTCGGTGAGCGATCAAGTCGTTGCTTCA  
GGCCATCGAAATCCTGGCTGGTGATGATAGCCTCGCGCTCATCGCGCTTTGCGATGA  
CTTCAAGCGCAGCCCGCAAAAATCCGTCTTCGAAGCTTTCGCGCTTGCTGATATTTGT  
CATCCAAACCGTCCTTCGTTCAAGTCTCACTGCAAGCAACTTGACCGCAAGCTTGC  
CACTCATCAGCCTGACAGCCTGTGGGCGATGGAACCTTGCCTGAAAATCCTAACGTAT  
TCGTGGAGGAAGCACAGCGGGAAATCCGTCCGAAGTCTTGGCAGCCCAGCGCACCG  
CCTCTTGGCTACCTGCGGTGATTGCGAGTTGCATGTGAGCCATCACGACCAACGCGT  
TGCTTTGTTTGACCACAACCTTCAACGAGTTCAAGCGGGAAGCCCGTTGCAACCGAT  
G

>CONTIG\_443\_length\_571\_cov\_0.950450

GTTGCCGAGCCTTTTCAATTCGCAACTGCAACGGCCGCTGGCTGCCGCCTGGTTTGCC  
TTGTTGCAGGAATGGGAAGACATCATGAATATCGCCGGCGACCCGTTGCCGGCCGA

TGCCAAGCTGGCGTGGTGGCAGCAGGAGCTACGCGATTGGTCGCAGCAGCGCTCGC  
GGCATCCGCTCGGGCGCGTGCTGGAACCGGTGCGTGCGCCGTGGGCGCAATTGGCC  
GACACCTTGCCCGCAATACAGGACGCCCCGCGTGCCGCCGCAATCGTTGCAGCAAGC  
GCTGGACACCTTGCGCGCCTTTGCCGAGGCCGTGGTTGCAGTCGAGGCGGTGATGTT  
TACGCGCAACCAGTCTGGCGATGGCACGGCGGTGGCGGTGCAATGGCTGGACGCAC  
GTCAGCGTGTGGCCGGCGACAGCGCAACGCCCGGTGGCATGACAACCGCCGCATGG  
CGCGCGCAATTGCTGCAGGCCTGGCCGCGCAAGCCTGCGTTGGAGCGGCCGCATCG  
GGTGTGGTCGCGGCTGGCACGTTTGCGCTTGACGCGGAACTCGCCGGGAAGGCGG  
CGTATCCGC

>CONTIG\_444\_length\_568\_cov\_0.619048

CTTTTCTTTTTTTTCTTTTAAATTTGAATTCTCCTCCTTCCTTTCTCTCTTCCCTTCCTTT  
CCTCCTCCCTCTCTCTTCCCTCTTTTTTCCCCCCTCTTCCTCCCTTCCTCTTCCCTCCTT  
TCTTCCCCTCCCCTCCTCTCCTTCTCCCCTTCCTTTTTTCTCTCTTTTTTTTCCCTTCTCCT  
CCCCTTCTTCCCTTCCCCTCCCCCTCTTTTTTTTCTCCCCTTCTTCTCCCCCTTTCCCTTCCC  
TTCTTTTTTTTCTCCTCCTCCCCCTCTTTTTCTTCCCTCTTCTTCTCCTCTCTCCCTTTCTC  
TTCTCCCCCTCTCCTCTCCCCCTCTCCCTCTCTCCCTCTCTTCTTCCCTTCTTCTTCTTCTC  
CCCCCCCCCCCCCTTCTCCCCCTCCTCCTCTTTTTCTTCCCCCTTTCCCTTTTCTTCCCTTT  
CCTTCCCTCCCCCTTCTTTTCTCCTTTCCCTTCTTTCCCTTCTTCCCTTTCCCCCTCCTCCT  
CCTTTTCTTTTCTTTCTAACTTCCCACCTTCCCCTCTTCTCTCTTCTTCTTCCCCCTTTT  
CTTCTCTCCCTCCCTCTTCTTTTCT

>CONTIG\_445\_length\_567\_cov\_60.695455

GTGCAGCAGGTCGTCGCCGCACGGCCAGATGAGCATTGGCTGATCTGGCACGACCT  
CGAGGCGGAGCGGCACGCGCTGCAGGCTGCAATCCCCGCTGCGGTCAGCATCTATG  
GCGACCAGGAGCTCGACGAGCGGAACAGGCGGTCATCGACTTCAGCGAAGGATTG  
ATCCCGATCCTCTCGGCGAAGCCCGTAATCGCCGGCAGCGGCTGCAACTTCCAGCGG  
CATTGCCACCTGTCGGTCTATGCCGGCATCGGCTTCAAGTTCAACGACTTCATCCAG  
TCCATTACCCGCATCCAGCGGTACCAGCAGGCGCACCCGGTGGAGGTGTGGATCGT  
CTACGCCGAGAGCGAGCGCGAGGTGCTGGCCAGCCTGCAAGCGAAGTGGACACGCC  
ACGAGGAGATGGTAGAGAAAATGAGCGAGATCATCAGGGAATACGGCTTGAGCAA  
GGCCGCGATGGCGCAGGTGCTGCAGCGTTTCGATCGGCGTGGAGCGCATCGAGGCCA  
GCGGTACCGGCTGGACCGTCGAAACAACGACTGCGTGGTGGAAACGCGCGGCATG  
GCCGAC

>CONTIG\_446\_length\_566\_cov\_9.015945

GGGGGCTTTAGCGGCTTTGGAGGCGATCTGGTGGCGCTCGATGGTGGCCGACGCTTC  
CTCGCGCTCCTTGGTTGGCACAGCCTTGGTGATCGCTTCCACCGTGGAATCGTCAAC  
CTCGCCCGTGATCTCGACCGATCCGCCCTTCCCCTCTTCGCTCGGAGTAAAGACCAC  
GTTGGCCTGGTCCCAGCAGGGATACCGGTGAGATCCGGCTGTTTGCTCACCGCGAT

GGTGGTCTTCGGCGTGACGGGGGCCGGATTGACGTTGCCACCCTGCAGCGGCAAGC  
CAGGCCCAGGGGTGAGATCCGGCAGCACTGCGCCGACGGCTTCTAGCGGGTTGAAC  
CCAATATCGATCAGCGACTTGGTGAGCTCTGCGGCCGCCAAGTTGAAAGCCGTGGTG  
GTGACGTGCGCGTAAGCCTTGTTTCATGGCCTCCTGCTTGCGACGGGTGGCATAAGGC  
ATGCGCAGCACGCGACCCAGCAACTGCTGGATGTCCTTGTCGCTTTTGAAGTTGGGCC  
ACCGAGCAGAACACATAGGCGAAGGAGCAGTCCCATCCTTCCTTGAGCGCTTGCT

>CONTIG\_447\_length\_566\_cov\_0.804100

GCGCAATCGTGTCAACGCGCTGGGCGTGTCCGAACCGACCATCCAGCGCCAGGGCG  
AAGACCGCATCGTGGTTCGAATTGCCGGGCCTGCAGGACACCGCCGAGGCCAAGCGC  
CTGATCGGCGCGACGGCCTCGCTGGAATTCCGTGCGGTGGTCGAAGGCAATGCCGA  
AGACGCCGTGCGCAGCGGCACCATTCGCGCCGGAAGCCAAGGTCTACCGCCTGCGCG  
ACAGCAATGCGCCGGTGTTGCTCAACAAGCGCGCGCTGGTGACTGGCGACCAGATG  
GTCAGCGCCAGCGTCAGCAACGACCAGAACGGCATGCCGGCGGTGGCGGTGACGCT  
CAACAACGTCGCCGGCCACAGCATGCTCGACTACACCAGCACCAATGTCGGCAAGC  
TGATGTCGGTGGTCTACATCGAGCGCATTCCCACCGTGACCATGGTTCGACGGCAAGG  
AAGTGCAGCGCTGCGGGTCAATGAAGAAGCGCTGTCGCCGACTCGCATCGCCGGC  
GTGTTTCGGCAAGAATTTCCAGACCACCGGTCTGAAAAGACCGAAGCCGAGAACCT  
GGCCA

>CONTIG\_448\_length\_561\_cov\_1.170507

GCACGCGTGCGCGCCCGAGTGCGTTGCCGCGCGAGGCACCGTGTCCGCGCAAGCGC  
AGACTCATGCGCGGCCTTGCGCAGCCGCGTGGTGTCCGTATGCACCGCAGCGAGG  
TGCGCATGCTCAGCTGTCCTCGTCGAAGCGACGCTCGAACAGGTCCACCAGCGCCT  
GCAAGGCCTCGGCTTCGTCTCGCCATCCAGGCGCACCAACGCTGGTGCCTTGGC  
CGGCGGCCAGCAACATCACGCCCATGATGCTCTTGGCATTACCTCGCGGCCCTTGG  
CCGCCAGGGTGGCGTTGCTGCGATAGGACGACAGCGTCTGCACCAGCTTGGCGGTT  
GCCCCGCGCATGCAGTCCGAGTCGGTTGGAACTATGAGTTCGCGTTCAAGCATCGTC  
GATGATCGCTCCGTTGCGGGTGCTGCCGCCGCGGTGGCGGGCAGCTCCTGCAAACC  
TTGTTTCGGGGTAGTTCATCACCCGCAGCAGCATCGGCAGGCTAAGCGCGGACACCC  
GGCGAACCGGCGTGCCCAGCTTGGCCAACCGGTTGGCGAGATTGCTGGGGCT

>CONTIG\_449\_length\_561\_cov\_1.154378

CTATATAGCACCCCTCATGTGAGCGCAAACGCGCAACGTTAGATCAAGAACAGTTC  
CGGTATGGGGTCCGACCTGCGGACCCCATCCATGGCTCACTTGCCGTATTTGTCGTG  
TGCAGCCACCAGCGCGGAAGCCAGGTTGTGCGCGTTCTTGTCCTGGTAGAACTTGCT  
CATCGCAGTGTTGATCTCGGAGCTCCATGCCAGCGAGACAGCCGCACCGTGAGCGA  
TCGACGAAACGATCGGCACCTCTTTGAAGTCCTTCATCGCGGTCTGCTGGTACGTGC  
TGAAACCGTCAGGCTTGACGTGCGGTACGAGCCGGGATAGATCCCTTGATCTTGTTGA  
ACGTCTGACTGGGCGTCGGCCGAACCGACGAAGCGCAACCAATCCTTGTTGCCTCG

GGGTTCTTGGTGCCGGTGGGCAGGGTGAAGGAGTCAGCCAGGAAATCGTAGACGAC  
CTCCTTGCCGGGCACACGAAAGCGGTGTAGTCGGCGTTGTACTTCTTGCCCTTCAT  
GTCGAACTCCGCAACGGCCCAGTCACCCATGACGTTGTAGGCAGCTTTACCG

>CONTIG\_450\_length\_561\_cov\_1.020737

GGTCTTCCTGATAACACCATCGACCTCACCTTCACCGGTACTGCTGGACAGAGTTTC  
GGCGCCTTCGTGCCACGGGGCATGACGATGAGGCTCATCGGTGACGCCAACGATTA  
CGTCGGCAAGGGGCTCTCCGGCGGTTCGGGTGATCGTCGCTCCACCGCTCAAAACGC  
CGTTTCAACCACGTGACCAGATCGTTGCTGGAAACGTCGTCGGTTACGGTGCCACCT  
CCGGTGAAATCCTGTTGCGTGGTTCAGGCGGGCGAAAGATTCTGTGTGCGAAACTCG  
GGAGCCACTGCCGTTGTGGAGGGAGTCGGCGACCACGGTTGTGAATACATGACCGG  
GGGAGAAGTGCTGGTGCTTGGCGCTACCGGGCGGAACTTTGCTGCTGGCATGTCTGG  
CGGGATGGCTTGGGTGCGTAACCTCGACGTCAGCCGCCTCAATGCAGATATGGTCGA  
TGCCCTACCGATGGAACAAGCCGATGTTGATCGGGTTACCGAGCTGCTGGAGCTGCA  
CCAGACCGAGACTGGGTCCACCCTCGCCGGGGAGATTCTGGCACAAGGGGGCT

>CONTIG\_451\_length\_561\_cov\_0.769585

TCAGTGGATTGGGAGAGGCAGACCTACCCTCAATCTGTGTGGGCACCATCTAATCAG  
CTGCTAGGATAAAAGCTAGCAGGGGAATATGGAAGGACTAGACTTGCTGAGTCTTC  
TGGCCTACATCTTTCTCCCCTGCTGGATGCTTCCTGCCCTTGAACATAGGACTCCAAG  
TTCTTCGCTTTTGGACTCTTGGACCTTCAACCACAGACTGAAAGCTGCACTGCTGGCT  
TCCCTACTTTTGAGGTTTGGGGACTCGGACTGGATTCCCTGCTCCTCAGCTTGCAGAT  
GGCCTATTATGAGACCTTACCTTGTGACTGTATGAGTCAATATTCTTACTAACTCC  
CCTTTATATACATCTATCCTCTTATTTCTGTCTTCTAGGAACCCTAATAACAATCA  
TCAAAGAAATAATTCAAGAAAATTTTCAGAGAACTCAAAAACATGAGTTGTCACACT  
GAAAAGGCCACCAAGTGCCAGATACAATGGATAAAAGAAACCTACATCAATGTC  
ACAATACCAAGACATGATAAAGAGAAGATTCTAAACAATTTTGGAG

>CONTIG\_452\_length\_561\_cov\_0.640553

ATCGAGGGTCGAGGGAGAATTCACCCTGCAGGAAAAGCGCTACCGTTTCAGTCTGC  
GTTTCGCGCTATCTGCGCTCGCTGTTGTTGAACGAACAGGAAGTGACAAACCAGCGCG  
ACCTGCTGCTGGCACTGGCGGGCGCCGTGCCGGACTCCCGCCTGGTACCGATCAGTG  
AACTGCCGGTCGCCGCCAGCAACCCATCGCAAGTCAGTGCCAGCCTGCTCGAAATG  
ACGACAGCCGACGGCAAGCAACAGGTCTATGAGTGGCACATGCCAGCTGCCAGCAC  
AGCGCCCGGTACGCCGGCAACTTTTCTGTATATCTGGCCAGCGTCCGGGCAAGCCTC  
AGCCCAGGACCAAGCCAATTTACGCGCTGGATTGTTGCCCATCCGCAGCAGGCGA  
CGCCGCTGTTGCAGATAAGGAACATGGCCAGCGGCGGGACAGCAACAGGCAAC  
GTCTGCAGCGGAAGAGAGCAGGCTCGTCTACCGAATGCAGCTGCATTACCCGGGCA  
ACCAGTCTGCCGGCGGGCGTCATTATGTGATCTACAAGGATGGCCAGAAAGTCGA

>CONTIG\_453\_length\_558\_cov\_0.835267

GATGCGCTCTCCAAAGAATATCTGGATTTTGAACGCAGCCAATGTACAGGCAAGTAT  
GACCACAGGCTTCCATACATAAAGAAAGGAAATAAATCATCCAGCAAATTAGTATC  
CCGCATAGATAAGGTTAAAGTAGCACGGCGGGTTGCAGCAGTAAATGCTGACCTAT  
CAATGTTTCGATCTAAAAATGAAAATAGAAGGCCTAGTGAGTTTTATACGAAAATCA  
ACCTCAGTATAGCCACAGAACCACCATTGTCGATGGTCTGCAACCCCAACCGTCGAT  
TTCAAGTAGTTTCATCGATACGCTTTACTTAGCAGTTCTCACTACACGCAAAGCTCGTC  
TAGAGCGCGTTATGAACTTTGAAGGGTGACGCATCATTGCTGAGCATGAGCACGGT  
GAAGACGTGCAGGGCAGCCAAGGTCTTGGGCAATCGCTCGTAGTCGCGTGTAGGCC  
GATGGCATCGATTGATCTAACCGAAGCTGCGTTCGACAACCCGGAGGGAACGGGGT  
CAGGTTGACTTATTAAGTGAACCTGACCCTGAGGTTTCCCCACATTACT

>CONTIG\_454\_length\_557\_cov\_0.976744

TGCGCATCGCGCGGCCGCTGGACGAATCGCGCGAGCATTATCTGGTGTTTCGTGTTGC  
TGCGCTTCCAGCGCGATGCGCATCTGCTTTCGCGCACGCAGGCATTGGCGTGGTTGC  
ATGCGCAGGAACAGATGGGCAGTGTGCGTGCCGATCTGTTGCGCGATGTGGGCGAT  
GGCTGTCTGCTGATTGCCGGGCTGTTTCCTGGCGTGGCGCAACGTCGCCGGCTCAGC  
GTGGACTACTTCATCGACCTGGGGCGCGGCGCCTATTCCGATGTGGCCGACACGCGT  
TGCAGCGATGCCAGCCTGTTGCGGCAACTGGCCGAGAGCTATCGCGAGTTGGTCCAC  
ACGCTTGCCGCACTGCGCCCGCCGCGCGAGTGGCAGCGCAGTACTGGCGGACTGTT  
GCATGCATAGATAAAGCGCCACTTCCGGGGCGGTCCCTACAGATGTGGGGACCGCCC  
CGACTGCCAAGTGCGCGTGATGCGCCACACTATGTTTCGCAACTGAGCGTTCAAGCC  
GACTGCGGATCGTTGTCTGATGGACCGAGCACTGTGCTATTGGCCGC

>CONTIG\_455\_length\_554\_cov\_0.978923

AAGTGACATGCTCTCCAAAGCGGCGTTCAACGCGCTGCTCAAAACCCTGGAAGAG  
CCGCCCGAACACGTGAAGTTTCTGCTGGCCACCACCGACCCGCAGAAGTTGCCGGT  
GACGGTGCTCTCGCGCTGCCTGCAGTTCAACCTCAAGCGGCTGGACGAAGATCAGA  
TCCAGGGCCAGATGACCCGGATCCTGGCCGCCGAGCAGATCGAATCGGATCCGTCG  
GCGATCGTGCAACTGTCCAAGGCCGCCGATGGCTCGTTGCGCGATGGGTGTGCTG  
CTCGATCAGGCCATCGCCTATGCCGGCGGCGCGTTCGCGCAGGACGTGGTGCAC  
CATGCTCGGCACGGTCGACCGCACGCAAGTTGGCGCGATGCTGCAATCGCTGGCCG  
ATGGCGATGGGGTGCGCCTGTTGCAGGTAGTTGCGGCGTTGGCAGAGTTTTCGCCCCG  
ACTGGAGCGGCGTGCTGGAGGCCTTGGCCGAGGCTTTGCACCGCATCCAGGTGCAG  
CAGCTGGTGCCGTCGGTGGCATTGTGCGCGATGGCATCGACCCGACC

>CONTIG\_456\_length\_553\_cov\_52.356808

CTCCACCATCGCTTTTCGAGCCCGCTTGATCCGCCCCTGCTGGATCGCTTGATGCGC  
GGGGAGACATGCCTCTTCGTTTCGCGCCAAGCGCCGCTGTGCTCTGGCCACCACTTTC

GTATCGGGATCGTATTCTTGCTCATAGAGCTTGGCTTGCGCATCTAGCACGGCCATG  
CGCGCTTTGTAGGGTCGCACCAGCGTATGGGCATACTTGCTGATTGAGCGAGCAAGC  
ATCTCGGTGTCTTCAAAGAGAAATGGCTTGGTGGCGTAGCTATCCACTCGCCGGCAA  
ACGAGTGTGGAGTGCGCCCGCTGGAACCTCGGGTTCAATCTGGATACCCGGGATCTGC  
CGCAATACTTCGAGAGACTGCTGAGCCACCTCTCGCTGGGCTTCGAGCCAATCTTCG  
ATCAGCTGCGCCTGCGCATTGAGCAACTCAGCGTCTTGTCGGCCCGAGGAACGAGC  
CAAACGCGTCACGCGACTAAGATGTCGGGTCTGACCGCTGTAAGGCGTGTAGAGAC  
CCGGGCGAGGCGCTGGCGCACGCGCCAAGCGCTCTTTGATC

>CONTIG\_457\_length\_552\_cov\_0.955294

GGTCAAGACCCGCCCCGGAGCCGGGTCTGGAGCTGGTAGAGGTCCCCGACCCGGTTG  
CTGGCCCTAATGACGTCATCGTCAAGGTGATGCGGACGGGAATCTGTGGCACCGAC  
GTTACATCGATAAATGGGATGGGTGGGCCGCCAAGACGGTGCACACACCGCTGGT  
CCTCGGCCACGAGTTCTGCGGTCAGATTGTTGAACTCGGTTCCGAGGTCAATGATCT  
GGAGGTCGGACAGTTCGTCTCCGGCGAGGGGCACTACGTCTGCGGACGCTGCCGGG  
CCTGCCTAGCGGGCAAACGTCACCTGTGCCGCAACACCCAAGGTATTGGATATGCG  
GTCGACGGTGCCTACTGCCAGTACTTCGTTCATGCCGGCTGGCAACGTCTGGGTACAT  
CACATCCCGGACCTTGACCCCGACGTCGCGGCGATCTTTGACCCGTTCCGCAATGCC  
GTACACACCGCCTTGCAGTTCCCCTGCCTGGCCGAGGATGTCCTCGTTTCAGGTGCT  
GGGCCGATCGGCATCATGGCGGCCCTGGTCGCTCAGTTCCAAGG

>CONTIG\_458\_length\_542\_cov\_0.795181

GCATACCACAGCTCAGTGAGGCTCCCTTCATTATTCTTCATTCTTTTTCTTTCTGTTT  
ATCAGACTGATTAATCTCAATAGACCTATCTTCAAGTTCATTGATTATTTCTTCTGCC  
TGCTCAAACTACTGTTGAACCTCTTTAGTCCAACCTCCAGAACTTGTATTTTTTTGG  
TTCTTTTTTAAAGAAATAATTTAATCTTTTTATTGATATTTTTTCATTTGGTGAGATAT  
CATTCCCACACTTTCCTTTAGTTCTTTAGACATGCTTTCCTGTAGCTCTTGAAACATA  
TTTAAATAGCTAATTTAAATCTTTGTTGGCAAGTGGAACATCTGGGCTTCCTCAG  
GGACAAGTTGTATTAAGTCTTTTTCCCTGTGTATGAGGAATACTTCCTTGTTTCTTT  
CCATGTCTTATAATTTTGTTGTTGAGAACTGAACATTTTCAGTTCCACAACTCTGGA  
TTCTCCTCCCTCTCCAGGGTTGTTTGTTGTTGTCGTTTGTGTTAGTGACCTTTCTGATCA  
AATTCTGAGAGTGTATTC

>CONTIG\_459\_length\_540\_cov\_0.837772

GGGCGATAACGCCTTGCGCGGTGGCCACACGTGCGGCCGCGTCCAGTTCGGAGGTG  
TGGCGCTGGCCGTAGCGCACGCTTAGGGCGTGACGGCAAAGCCCTGTTCCCTGCGC  
GAGCGCGACGACGGCGGCGGAATCCATGCCACCGGACAAGAGGACTACGGCTTTTT  
TCATGACGGAATCAGGCTGTAACAACGGAAGCGGAGAGGCTAGCAGGGTCGGCGTT  
GCACGGCGACAGCGCGCTATTGCCGCATGGTCCTGCCAAGGAGTTCTGGTATCCGGT  
CGAGGCCTAGGGTTTGAATGTCTTGAGCGCCTGTCTATTGACGCTATGCGGCTGAAA

```
>CONTIG_460_length_539_cov_0.453883
```

```
>CONTIG 461 length 538 cov 0.681265
```

```
>CONTIG 462 length 538 cov 0.625304
```

CAGCTACACCGCCCCGCTGACCGATTTCGCTTCGCCCTGCACGACGTGCTCGGTGC  
GCAAGCCCTGTTCGCCCGGCTCGGTTACACCGATGCCAGCACCGACATCATCGACGC  
CGTGCTCGAAGAAGCCGGTCGCTTCACCTCGCAGGTGCTGGCGCCGCTCAACAGCAT  
CGGCGACGAGATCGGCTGCGCGTTCGACAAGAGACCCACGCTGTGACTACCCAC  
CCGGCTTCGCGCGGGCGTACAACCAGTTCGTCTGAAGGCGGCTGGAACGGGCTCACC  
GCCGAGACGCAATTCGGTGGTCAAGGCATGCCGCATACGCTGGGCGTGCCGTTGAG  
CGAGATGATCAACGCTGCCAACCTGGCCTGGGGCAACTTCCCCTGCTCTCGCATGG  
CGCGATGGAAGCGCTGCGCCAGCATGGCGAAAGCTGGCAGCAGGACGTCTTCCTCA  
AGCCGCTGATCGATGGCCGCTGGACCGGCACCATGTGCCTGACCGAGCCGCATTGC  
GGCACCGACCTGGGCCTGCTCAAGACCCGC

>CONTIG\_463\_length\_536\_cov\_41.136919

GCAGCGACACGTGCTGCCTCGGCCTGTGCATCGGCGCGGCGCTGTTCTTCCTCGCGC  
TCCTGCTGCTCGCGCGCCAGCTTTGCCGCTTCCTCCTGACGAATCTTCTCGCGCTGCG  
CTTCCAGCCGCTGCTCGTCGACGCGCTGCTGCTCCGTGATGCGCGCGGTGATCAGGT  
TGCGCAGATCCTCCGGCGACTTCGTGGCGCACAGCTGCACGCGGTGATGGAACAGG  
CCGGCGAAGGTGCCCATTTCCATTTCCAGCACGCGCACGTTGGCGCGCACACGCTCG  
GCCTGCTGGCTGGCGGCGATCTTGGCGTTTGCTGCAGCCGTACCAACTGCATCCTGC  
ATGCTGCTGATCGACTTCTTGCCCTTGATCACCGCGCCGATGTCGGCTTGACGCGAA  
GCCGGTACCGCCAGCGCATGCGCATCGAGTCCCGCGTTTATGGACGCGTAGTGATCC  
CGCACCGACTGCACGCCGTTGGCGACGATCTGGGTGCGGCGGTTGTCCTTCTCGACC  
TTGACCAGCTTGTCAGCTCCAG

>CONTIG\_464\_length\_536\_cov\_0.911980

CTGTCCAGGTGGCATCGATGACGACCGACTGGGTTTCTGGATGCAGATCGACATGGT  
TGTCGATCGCGACGATGCGCGGCTGCGGCAGATCCTTGTAATTGCGGTAATCGCGCT  
CGTAGCGCGCCTGCAGGTCCAGCCGCTGTTCCGGCGACAGGAAGCTGTTGTAGACG  
TTGGTGTTCAGTACAGCCAGCCGCCGATCGCCGCGAAGCCGAGCAGGCTGGCCGC  
CAATGCCGCGCCGGTCGGGCTGCGCAGGCGCCGCAACGCCAGCCGCACACGCTGTC  
GCAACCCGTGGCCACGCCGCGCGGCCAGAATGCCGAGGACAGCAACAGCAAGGC  
CAGCAGGAACACGCCCCAGTAGCCCTGAAACCACAACTGGCCGGGCAAAAAGTGCC  
CGTAGCCGTTTCATGTCCGAATACGGTGCGTTGGGCCAGCCGCCGAAGGTGTAGAGG  
TTCTGGGTGTAGTCGAGCATCGACAGCACCGATTGCCCGATCAACACCAGCATCAGC  
AGCGCATAGCCGACGAACTTGTTGTTGCTC

>CONTIG\_465\_length\_535\_cov\_1.389706

CGACAAGACCGTCATCATCAAGCTCAATGGCGGGCTCGGAACCTCGATGGGCCTCG  
ACCGAGCTAAGTCGCTGCTCGAGGTTCTGTACGGCAAGTCCTTCCTCGACATCATCG  
CTACCCAGGTGCTCTCGGCTCGCAAGACTTTCGGCGCTCGATTGCCGCTGATGTTCA  
TGAATTCCTTCAATACCCGCGAGGACACCCTCAAGGCCCTCGAGAAATATCCAGAGT  
TGGCTGTGACGGCCTAGAGCTCGACTTCCTGCAGGATCAGGAGCCTAAGCTCGAC  
GCTGAGACCCTCGCCCCGTTGAGTGGCCGAAGAATCCCTCCCTCGAGTGGTGCCCT  
CCGGGCCACGGCGACCTCTACACCGCCCTGCTTGATCCGGCGTCCTCGACCATCTG  
CTCGAGGCTGGATACCAATACGCCTCGGTATCCAACGGTGACAATCTTGGTGCCGTT  
CCGGACGGTCGTCTCGCCGGCTGGTTTGCGGCGTCAGGTGCTCCCTACGCTGCCGAG  
TTGTGCCGTCGCACTATTAACGAC

>CONTIG\_466\_length\_535\_cov\_0.852941

GAACATCTGTTATCAAAGTAAGAAACATATCTATCTAGCTCAGATATTCAACTTGAT  
ACAGGTTTTAATTTCTGAGTGTGACATATTTGAAATATGTCAAATAACAAAGTTAG

ATATGGACCTCGGAGAATTGGACTCCCAAGCATTTGGACGAGTCTGTTGAAGCAATA  
GTTGGTATCAATCCAACCTTATTCTTCCGTCCTCCAACCTGCCCCTTTAGATAGAAATGG  
AAGGTACTGGCAGGATTCTCCGCCTCTGCTCCATGGGGATCACGAAAACCTTCCAAA  
CAGGATTTATATCTACTCTTAACCTGGATCTCAGATACGGCCTCTTTGATCCTTGAGA  
GCTAGAGATAAAATGGCCTCAACCCTCCTAATTCCATGGCTGGCAGGAGTCCAGAG  
CCCACTGTTAGGCTTCCGGACGGTCCGGGGGGCTTACATCTCAGAGCCTCTTCTGCG  
TTCTGAGCTTCTGCTTCCTCCATTCCATTGTCCATGCTGAGCAGGCCAATCTGCACAT  
GAAACTCAGCCCCTCCGCTG

>CONTIG\_467\_length\_534\_cov\_29.375921

GGTACCGGTTTCGTCGCCACCGCCACGCCGAGCCCGAACCGCTACAAAGAGCTGATT  
CACTATGCAGGGTTCCTGGGCGTGATGGACACCGGCCAGGCACTCACACGCTGGTTC  
AAGCGTGACAGCACGCAAGCCAACAACCTCACGCTGTACCCGCACAAGGAGCGCGA  
GTTTTGGTTATGGGTGGCGAGCTGGGCGCTGTTCTGCAGAAGCCGTCGGACCTGGG  
CTACAGCGACGAGGGGCTATGACCTGCCGGAACCTGACCGTGCACTACGTTGAGGTGC  
CGGTGGACCACAACACGGCCGGCGCCGAGCGGGATGGCCAGGGCAAGTTGTTCCGC  
GATGCCGCGATGGGTTTGCAGAACGCGGCTAAGGAAAAGCGCGACACGCTCGGCGC  
GCGCGTGGCCGCTGTGCAGCAGGTGCTCGCCGCACGGCCAGATGAGCATTGGCTGA  
TCTGGCACGACCTCGAGGCGGAGCGGCACGCGCTGCAGGCTGCAATCCCCGCTGCG  
GTCAGCATCTATGGCGACCAGGAGCTCG

>CONTIG\_468\_length\_533\_cov\_0.418719

GGTTTAGGTCATAGCCATTGACTTCATCTATTTCTTCTCTAAAAAATATTTCTTGAGG  
ACCTACTGTGTGTCAAGCAGTGAGCTTGTCTCTGAACAAAATGGCTCTGGATCTTTT  
CCTCATTCCTTTTCTCTCTCCCTCTTTCCCTTCCTCCCCATCTCTCCTCCCTTCCTTCCT  
TCTTTCCCTCCTCTCTCTGCCTCCCTTCCTCCCTCTTTCCCTCTTCTCCTCTTTTCTTT  
CCCCCTCTCTCTCTCCTCCTTCTTTTTCCCTTTCCCTTTTTCTCTTCTCCCTCTTCTCC  
CTTTTCCCTTCCCCCTTCTCCTCCTTCTTCCTTTTTCTCCCTTCCCTTCCCTCTTCCCTC  
TCCCTCCCTCTTTCCCTTCCCTCCTCCTCCTCCTTCTTCTTCCCCCTCCCTTCTTCCC  
TTTCTTCCTTTCCCTTCCCCCTCTCCCTCCTCTCTTCTTCTCTCTTCTCCTCTTCCTTTT  
CTTCTTCCCTTCCCTCCCCCTCCCCCCCCCTTCCTCCTTTTTTCTTTCCCTCTCCCTT

>CONTIG\_469\_length\_532\_cov\_0.829630

GTCTTTGCTATTGTGAATAGTGCCGCAATAAACATACTTGTGCATGTGTCTTTATAGC  
AGCATGATTTATAGTCCTTTGGGTACATACCCAGTAATGGGATGGCTGGGTCAAATG  
GTATTTCTAGTTCTAGATCCCTGAGGAATCGCCACACTGACTTCCACAATGGTTGAA  
CTAGTTTACAGTCCCACCAACAGTGTAAGAGTGTTCTTCTTCTCCACATCCTCTCCA  
GCACCTGTTGTTTCCTGACTTTTTAATGACTGCCATTCTAACTGGTGTGAGATGGTAT  
CTCATTGTGGTTTTGATTTGCATTTCTCTGATGGCCAGTGATGATGAGCATTTTTTCA  
TGTGTTTTTTGGCTGCATAAATGTCTTCTTTTGAGAAGTGTCTGTTTCATGTCTTTCGCC

CACTTTTTGATGGGGTTGTTTGTTTTTTTCTTGTA AATTGGTTTGAGTTCATTGTAGAT  
TCTGGATATTTGCCCTTTGTCAGATGAGTAGGTTGCGAAAATTTTCTCCCATTTTGTA  
GGTTTCCTGT

>CONTIG\_470\_length\_532\_cov\_0.785185

ATGTTCTGCACATCCGCCAGGTGCAGACCGGTGGTGGGCTCGTCGAGAACGTAGGT  
GTCGCCCTTCTCCCCCATCTGGATGGCGAGCTTGATGCGCTGGCGTTCTCCGCCGGA  
GAGCGTCGACAGCGGCTGTCCGAGCGAGAGATATCCGAGACCGACGTCCTCCAGGC  
GTCCGAGGATCGCCGCCGCTGCGGGAAGCTTGGCATCCCCTTCGGAGAAGAAGACA  
CGCGCCTCGGAGACCGGCAGATCCAGCACCTGCGTGATGTCCTTGCCGGCGAGCGT  
GTACTCGAGGACGGCAGCCTGAAAGCGCTTGCCGCCGAGTCCTCGCAGGGAGTCT  
CGATGGTGTCCATGAAGCCGAGCTCGGTGATGATGACGCCCCGCGCCCTTGACATCG  
GGCACGCACCTTCGGAGTTCGCGCTGAAGAGAGCCGGCTTGACGCCGTTGGCCTTCG  
CGAACGCCTTGCGGATCGGCTCCAGCAGGCCCCGTGTAAGTGGCGGGGTTGCTGCGG  
CGCGAGCCCTTGATCGCCCCCTGAT

>CONTIG\_471\_length\_529\_cov\_0.768657

TTTCCGGGATTGGCAATATCTATGCCGACGAACTCTTTGGCGGGTCCGTCGTCACC  
CCGAGACACCATGCTCTCGCCTGAGTCAATCTGAAGCGGTGGAATTGTTACAGACGG  
CCCGCGATGTTATGGCAGAGGCCATGTCTCAGGGCGGTACCTCTTTCGACTCCCTTT  
ATGTCAACGTTAACGGGGAATCGGGGTGGTTTTTCCGCGTTGTGGATGCCTATGGCC  
GTGAGGATGAGCCCTGCCACCGATGTGGGATGCCGATCGTACGCGAGTCTTTCATGA  
ACCGGAGCTCGTTCCGGTGCCCGAGGTGTCAGAGACTACGGTGATCCTGCCGTCATC  
TGGCATGGCTAGCGCAGCTGTGGCCCTGTCGCCTTGGGCCGGTGGGTGAATGCTGCG  
TCGGTCAACATCGGTGGGTGAAAACGCGAAGAACGAGCTCCCGATGAGGCGTTTCGC  
TGGCACCTTCAAGGCTGCCGAGTTGTAGTTCCATGCCCATGAAGGCGGGAAAGTTGT  
CGCCCTCTGTCTGGTC

>CONTIG\_472\_length\_526\_cov\_0.771930

GGCCACTTCCTCGTCGGCCTGCTCGCGCTCCTCGATCTCCGGCGACTCGTGTCGCGC  
GTAGACCATCTTGGCTTTCTCCGGGTCGAAGTTGGGCGGCAGCTTGGCCAGGGTCAC  
CGTCTTGCCCGGCGGCGCGGGCACAGCTTGGCGATGGAATCCACATGGCCGAAGC  
CCATGCCCAGCACGCGGCCGATGTCGCGCAGCGCGCCCTTGGCGGCCATCGTGCCG  
AACGTCGCGATCTGGCTGACCGCCGGGCGGGCGTATTTGTCCTTGACGTAGTCGATG  
ACGCGGTGCGGTTGCCCTGGCAGAAAGTCGATGTCGAAGTCGGGCATCGACACCCG  
CTCCGGATTTCAGGAAGCGCTCGAACAGCAGGTTGTAGCGCAGCGGGTCCAGGTCCG  
TGATCAGCAGCGCGTAGGCCACCAGCGAGCCGGCGCCCGAGCCCCGCCCCGGGCCG  
ACCGGGCAGCCGTTGAGCTTGGCCCAGCGGATGAAGTCCGACACGATCAGGAAGTA  
GCCCCGGAAGCCCATCTTG

>CONTIG\_473\_length\_525\_cov\_0.851759

GTTTGGTTTTGAGGTTTTTTGTTTTTTGTTTTTTGAGACAGAAAAAAGCGACAGAGG  
CAAGAATCTCTTACTCTGTCACCCAGGCTGGAGTGCAGCGGCACAATCTCAGCTCAC  
TGCAACCTCCGCCTCCTGCATTCAAGCAATTCTCCTGCCTCAACCTCCCGAGTAGCT  
GGGATTACAGGCACCCACCACCATGCCCACCTAATTTTTATATTTTTAGTAGAGATG  
GGGTTTCATCAAGTTGGCCAGGCTGGTTTTCGAACTCCTGACCTCAGGTGATCTGCCC  
GCCTCAGCCTCCAGAGTGCTGTGATTACAGGTGTGAGCCACTGCGCCTTTTCAAAA  
CCATGGTTTTTGGTTTTTTGAGACACGGCATTATATTTTCAGCACCCAACTTGTCATCA  
AACAATAATCTGCAGCTAGGAGGCTCATCTGTCAAATGTCCAGCACAGGAGGCAC  
AGGTCTGGTGCCCGGGCAGGTGTGGCCACAGCTTCTGCTGCTCCACGCCACGGGCC  
ACAGGGAACCC

>CONTIG\_474\_length\_525\_cov\_0.457286

CTCCCAAGTCGCGTCCACGGAATGAATCTCGTGCAGATGATCATGACGAAACGAGTT  
CCTTGGCTGGTCGTCTTTCTCGGCGCTCGCTAGGGGCATTTAGCCATCTCTTCAAGAC  
GAGTCCGCGTCGTTTGAATCAAGAAGATGAAGACGCTGCATCCATTGACGGACCTTT  
GACCACATCGCCTTCACGCTCACGTCTCTTCTTCACACGTCGACGTCGCCAGAGTTT  
GCAAAATGCGCGAAATCCTATGCCGCGCCGGCCAGATGCAACTGCAGCTTGGCCTG  
CATGTCCGGCACAGTGAGCACGTGAGCCCGGACAACAGGCCACCGTGCGCGGCA  
GCAACCGTCGCGCCGAATCCGCTACAGCGATCGCACGATGCTCGGCCAGTTCGGTC  
GCACCCAGCATGCCGGCGCCCGCCAGCGGATGCGTGGAGGCCACCGCGAACACAAA  
ACGCAGCGTGCCGATCGGCTCGGCGACATAGCCACCACCACTCGGCCCTAGCCCG  
CCGCGACGATCAGATC

>CONTIG\_475\_length\_521\_cov\_15.802030

ATGCGTCGGTCGGCGAACCATCGGTGATGAGAAACACCCAAGGTCGGTAGTAGGAA  
ACGCCGTTGGCTTTGTAGATCTCCTTGCGTTGCCGAACCATCTCCAAGCCTTGCTCAA  
TCGCTGCGCCCATTTGGGGTGTCCCCGGTGACGAAAGCACGGGAGGATAGAAGCTA  
TCTGCCGTGACAAAGTCGGTTACGGTCTGGACCGGACCGAAGGTGACGATGGCGAC  
CTCCACCCGTTTGGCGGCGAGTGAGTCCGAGTTCAGTTCTTCCTGAAACTGCAGCAG  
ACCAGCGTTGAGCTGCTCGATGGGCTTGCCGCTCATGGAACCTGAGGTGTCCAGCAA  
CAGCAGGCATGCGCACCGGTTCTCTGGGTCTCCGCAAAATCGCTGGCGCCAAAAG  
GCACCTGTTCAAAATCGTTCATTACGATGGATCTCCCTGTCCATTGGTTTGAAGCGCC  
ATCATAGCTCCGCCAATCAACCCAATCTATGATGGGCCATGGTGACTCGCCCTACCC  
CTACCTCATT

>CONTIG\_476\_length\_521\_cov\_0.736041

GGTTCTCCTGGTCGCCCTTCAGGCCAGGTGCGCGAGCAGGAACTGCATCAGGTGCG  
GGTGGCCGGGGTAGCGCACGGTCTTGTAGTCGAGGTTGCGCACCTTGCCCGCCCAG

GTCTCGCACAGCGTGCCAGGCCGCCGGAGGTGTTGAAGGCCTCGTACTCGGTGCC  
GTCCAGGCTGAAATGCTCCAGGCCTTCCAGCGGCAGGGCCGAGATGAACTCGCCGC  
CGTGGATGGCTTCGCAGGGGTGGCAGTACTCGTTGATCAGGCCGTCGACCGACCAG  
GTCAGGTTGTACTTGAGCTTGTGGTTCGGGAAGGCCGGCAGCGCACCGACGCGCATC  
TGCACATCGCGCACTTCGTCGAACTGGCTGGCCAGGTGGTGGGCGACGATGCCGAT  
GAAGCCAGGCGCCAGGCCGCACTGCGGCATGAAGGCGGTCTTGGAGCCCTCGGCCA  
TCTTCATGATGGCCTTGGTGGCGGCCACGTCCTCGGTCAGGTCGAAGTAGTGGCAGC  
CGCACTCCAGTGCC

>CONTIG\_477\_length\_520\_cov\_0.732824

GTCGAGTTTAAAGGCGGCACAAAGCCTTTTCTGCTTTCTGGCGAGGGCGCTTATGCC  
GTGCTGCTGAAAGCGGACGATGTGCAGGGCCGTATCGGCACGCCAGGTGCGCTCAC  
TAAAAAAGGCAATAAACCGGAAAGCAGCGTGGCTAAGGCTGTGCCCCGACCGGTTA  
TTCAGGCGGCTAAAACCCCTCAGTGGCGAACCCCGTCTGCTGACCGCACCAAGAAATG  
GACGCGCTGAAAACCCGACTGCTTGCAACGGTCAATCATAATGACGATGACACGTG  
CGACAGCCTGTATTCACCTGCAGAAACAGCGATCCGGAAACTGACGGACTCACTCTT  
ACGCCACTGGACGACACACGCTTTGCTTTCGGCGCTCTGCTGGCGTGCCGCTTAT  
AACGAAGGATATGGCTACTGGGTCAATTGATAATCAGCTGAAAGGCACGCCGGTGCT  
GGTGACCATCTCCGGGTCGGATTACGACAAGGGCGAGATTACCAATGTGCAGAAAG  
GCCGCGGTATTGG

>CONTIG\_478\_length\_519\_cov\_0.859694

GTGCTGGGTGCCTTTCTTTGTGGGAAAACCATATTGGCCAAGTCTCTAAAGCTGATG  
CACACCCCTCATTCTGTGCAAGTGAGTCTCTCAGAGCCTTTCAGCACCCGCCTCCA  
GTGCCTAGTGAGGTAGTCATGCCACCCGGGAAAGTGGGCAATGCTGCCTAAGAACA  
GTGCCACATTCCAGCAAACCTGTCATCCCAGAGCCTTGCAACCTCCTCTCCAAACGC  
TTGCAAAAAACAAGTGTGAGCGCTAACAGACTCCTTGCCGGAAACCAGGTAGCCA  
GAGAAGCTAGTGACGCACCTGAGGAGGAAACCAGGGATCAGGACACTTCAAAGAC  
CCAGTGCTGGCAAGGTGCCCCGGGCGAGGGTGACTGTCAGGACATTTCTGCATCATC  
CAGTTATGAAAGCTGATTCTATTTAATTCAAGTTTAATTAACAGGGGGGCCAGTTC  
CACCCAAAGGCAGAAGACGCTGTCAGCGGATGCAGAGTGAGATCTGAGGACCAGG  
AAGCAAAAGTAG

>CONTIG\_479\_length\_518\_cov\_9.856777

AGATCTCATACCACTGGTTCATCTCGCGCTCGCTGCCGAACTTGATCGTCCAGACTG  
GATGATCCACATCTCGAACGCTGACCGTGATCGTTCCTTCCCGCCTTGAGTTGTGCC  
AGTGCTTCTCCCAAGAGCGAACATCCATCAACGGGTAGATCTTCACTGTTCTGCCGA  
CACGAATTTTCAACCGCGACCGCTCAATCGAGATCGCCAAAGCTCCTTGTCGCCCAA  
AATACGAGCGATCAAACCTCCCGACCAAAGACCTCCCGTTGGTTGCGCAATCGGTCA  
GCCCCGATTGACGGCAACGGCGACCAGCACCGCTGTGCCAGGGCAAGCAAGATGAG

AAACGTGCTAACGGTCATGTGAACTCCTGAGAACAGAATGGGACCATCGTGGATTG  
CAGACGGATGGCTATTGGACGCGGCCGGTGATCTTCCAAGTGCCGCCACCTTGGTG  
AAGGTGTAGACCCCATCCATTTGATGACCAAAGTCCCGCTCCATGGCTTCAACCTTG  
GCACTTAC

>CONTIG\_480\_length\_517\_cov\_43.335897

CCTGGACATCACGACAAATACTTTGACCGGAGACAGTGATGGTAGATGTTTCTCGCT  
CGCAGCTACCGCCGCTGTCCCTGCTCTCGGAACCGGAGCTGGCCTTTTCTCTGAAC  
AATCCGGGGGGCGAGATGTCCACCCCCTTCGCGGGCTGGCGCACTACGGCCCGTTCT  
CGTCCCAGACATTACAGCCAGTTCACGCCACCGTTCTGTATTGCCACAGTGGGCCCAG  
AAAGGGCGTTCAAGACTCGTGGCGCGCTCATGGCATCGCTGAAGCAGCAACATTCG  
GCCAGCGACAGAAGCGGCTACGCACCAGATTTTCCCGGCTTCGCCAGCGTCTTCGGC  
GTGGACTTGGCTTCCTCCGACAAGGCGAACCACATCCGTTGGCCGGATTCCATCGAC  
GATCTTCCAGGCTCCGGCACCCCTTCAACATCGCCTGGTGGCCGCCTTCGAGGCAGCC  
CTCTCGCAACTAAGCACAAGGCACGAGCAGTTTGATGTGGTCCTAGTCCATCTCCCA  
GAGGC

>CONTIG\_481\_length\_515\_cov\_3.832474

ATCTTGACTACCACCCGCAAGCGATTACAGGACACTCGCCCTGGCGGACTAGAAGTA  
GGCTTCGGCTTCGATCCAGCGGGCAATCTCACCGTGCTGACACCGGCTGGGAACAC  
AACGCCAGAGATCGGCCTGGACTATGACGCGCTGGGCCGTCTAACTGCCCTTAAAG  
ATGGCGGCACTGGGACGCTGATCGACGGCTATACCTACGATGCCACCGGCAACCGA  
CTGACCGCAAAGGTGGGCACGGCTACCCAGGCCTATATTTATCCGGCGACGAGCCA  
TCGCTTGAGTGCAGTGGCAGGCGTCGCACGCACTTACGATGCCGCAGGTAATGCTAC  
GGCCATCGGCGGCACCGCCAGGCAATACACCTATGACACCACGGGTCGCATGACCC  
AGGCCCGCCGCGCTGACGCGGTGACGATGAACTATCGCTACAACGGCCGAGGTGAG  
CAGGTGCGCCGTTCTTGGGAGCTACCAACACCTATACGCTCTACGATGAATCAGGC  
CATTGGCTA

>CONTIG\_482\_length\_515\_cov\_0.927835

GATCGAGCGGATCACCGCACTCGGCAAGCGGGTCGGGTTGTGCTTGATGATGTAGG  
CGTTGGCGCCGTCCTGCAGCGCCATGACCGCAGTCTCCTCGCCCATGGTGCCGGAGA  
CGAAGATGAAGGGCGTAGCGCCGTTCTGGCGCACCAGACGCAGTGCCTGGTGGCCG  
GAAAACCCGGGCATGCTCAGATCCGACAGCACGATGTCCGGCTGGAATGCATCCAG  
CGCGCTGCGCAGCGAGCGTTCGCTGTCCACGCGCTCGAACGCCGCGTCGATGCCGG  
CATCCAGCAGCTGATCGGACAACAGCTCGGCATCTTCCGGTGAATCTTCCACCAGAA  
GGATCTTACGCTGCTCCAGTTTGCCACCCTCTTGCAGCATGGTTCAGTCCAGCTCCG  
GTGCCTGATTGATGACCGCCCAGAACGTGCCGAGCGTCTTGACTGCATTGAAGAACT  
GATCGACATCCACCGGCTTGACCACATAGGCATTACGCCCAGGTCCCAGCTGCGG  
GCCAGGT

>CONTIG\_483\_length\_514\_cov\_0.868217

GTGTCAACACAGGCAGGCTGGATCTGCCAGTCTCCGCTGCGGAATTCCGCCAACAG  
GGTCGACTGGATGCGCGCGGCCCAAGAATCGACGGTCAGCATGATCTCGCGCTCAT  
GACGGCCGGCTTCATCCAACGCAGCCAGCGTTCCTGTGGGTGGGCTTCGTCAGGAT  
CAAAGAACTTGAACAACCTCAGCCAACCTGCGGCAGGGGGCCACCACAGGCGATCAGG  
TGCCGGCGGTAGAGCATCTGGTAGTCGGCGCGCAAGGGATACCAGGCTTGCTCTTCC  
AGCTTGGCACCCGGCAGCACGTTGGACGACTTCAAGGCGGTACGCGAGCCGGCCCCGC  
CAGGTAGAGCACAAAGGACTCGGTGTAGGCAAGGTTCCGGCGCTGCGGCGACTGCG  
CCAGGGCCCGGCGCCGGCGCCGCGGACCGCCAAACCGAGGGCAAGCATCCCGGCA  
CGGGAATAGCCGCCAAGAGCACTGATGTGGGTCAGAAACATGGGCATGAAAGCTGG  
TGCGCCAG

>CONTIG\_484\_length\_513\_cov\_36.784974

GTTGGTTTGCCGGCTTGGAGGCCTGCGCCTGGTCGTGCTTATTGACCAGGTGGGCTA  
GGTAGGCCTCGTTGAACTGCACGGTGGAGCTGGTGGTCTTGCGGATGGCGATGGCGT  
CGCGCTGCGCTTCTTTGCCGGTTGCACCACACACGGCCTGCGCCAACGGTCCCATGC  
CCAGCGAAAAGAGACGATTTCCCTGCGGGCTGGTCAGGTAGTAGTCGCGTTTGGGC  
GTGCTGCTGGCGAGGATGTCCAGCTGCTTTTCGTTCAAACCGAACATCCGGTAGAAC  
TTGGCCACCTCGTCGTTTCGGGCGCTGCTGTTGGGCAGGAAGATCTTGGTCATGCAC  
GCCTCGATCAGCGTCGGCATGATCTTGGATTGCGCCACGTCGGCCAGACTCTGTGTG  
GCAAACCACACCGCGACGTTGGCTTTACGCAGCACCTTGAGCCATTGCGGGATCTTG  
GCCGAGAACGCCGGGTGATCGAGGAACAGCCATGCTTCATCGAGCACCAGGATGCT  
CG

>CONTIG\_485\_length\_513\_cov\_24.272021

AGTCCTGCATCATTAGCCGACGCTGTTCAACGTA CTGCGCATGGTTGTAGGTGGCGC  
TGATGCGATTGGGGTCAGCATGTGAGAGTTGCGCGTCGACCCAGACCTTGGGGTAA  
CCCAGCTCATTGAGCGCTGTTGAAATCGTCGCCCCGGATGCCATGACCAGTGAGACG  
ACCGTCGTAGCCCAGCCGCTTGATTGCGCGGTTGACCGTGTTTTCGCTCATGCGGGC  
ACTGATCTGCTTTACGCCCCGAAAGAGATACGTTTGCGCGGGTTTAAACTGATCAAG  
CATGTGCCGCACGATCTCGATGGCCTGCACAGGCAGCGGCACGATGTAGGGCGGGA  
TGTCGGTTACGCGCTTTCGCTTCTTCTTGGTCAGCATCTTGCGCTGCTTGAGCGACAT  
CACCGGGATGATCCACAAACCTTGTTCCAGATCGAATTGGTCCGGCGTGGCCAAAC  
GTAGTTCGCCTGTGCGTACACCCGTCAGCAGCAACAGGCGAATGGCCAATTGGGTC  
ATCT

>CONTIG\_486\_length\_513\_cov\_19.494819

CGAGCATCCTGGTGCTCGATGAAGCATGGCTGTTCCCTCGATCACCCGGCGTTCTCGG  
CCAAGATCCGCGAATGGCTCAAGGTGCTGCGTAAAGCCAACGTCGCGGTGTGGTTT

GCCACACAGAGTCTAGCCGACGTGGCGCAATCCAAGATCATGCCGACGCTGATCGA  
GGCATGCATGACCAAGATCTTCCTGCCTAACAGCAGCGCCCGAAACGACGAGGTGG  
CCAAGTTCTACCGAATGTTTCGGTTTGAACGAAAAGCAGCTGGACATCCTCGCCAGCA  
GCACGCCCCAAGCGCGACTACTACCTGACCAGCCCGCAAGGCAATCGCCTGTTTTTCGC  
TGGGCATGGGACCGTTGGCGCTGGCCGTGTGTGGTGCAACCGGCAAGGAAGCGCAG  
CGCGACGCCATCGCCATCCGCAAGACCACCAGCTCCACCGTGCAGTTCAACGAGGC  
CTACCTAGCCCACCTGGTCAATAAGCACGACCAGGCGCAGGCCTCCAAGCCGGCAA  
ACCAAC

>CONTIG\_487\_length\_512\_cov\_0.792208

GTACATTATTAACACTTACTCACATTTGTGCTTTTTCAAACCACACTAAACTGACAG  
TAAAGACATAGACCCAAATGGACAAAAAGGATCAGACAGGTGATAATAGCTACAA  
AATTTTTGAAGCTGGAAAGCTTATGAATAAAGCTAGAATATAAGTTAGCAGTGGAA  
TAATCATGAAAGTATGTGGATTTGCACCACGGAATCCCGAAAGACTTTAGGAAGTA  
GAGGTACTAATGGAAGTGTGAATAGAATTATGAGTTATCAAATTGTCGTATAAATCA  
AAGCAGATAGACTCTCAGATCCCGTACACCATATCACAAACCTTAGCAATTGTCTCT  
CATTCACCCCTGATCTAAGAGCCTGGAGATTACCCTAAATACCTTCTCAACAGTGGG  
ACTTCAGCCCACCTTTGTCTCTCAGCCCCTAGACTGTTAGTAGCCAGGCTTATACTCTA  
CCCTGTCCACAAGCAGGAGATTCTAGCGTATTCTTCCCTAGGGAGATTAGCCCAAGA  
G

>CONTIG\_488\_length\_512\_cov\_0.766234

ACAACGAAAAACTGTCCAAGGCCGACATGCAGAACCGTGTCGAGCAGGCGCTGCGG  
CAAGGGGGCGCTGGGGGACGAGGTCAAGGACAAGCTGGGGCAAAGCGCACTGGGTC  
TGTCCGGTGGTCAGCAGCAGCGGCTGTGCAGCGCACGTGCGGTGGCACTGCGACCG  
GATGTGTTGTTGCTGGACGAACCGACCTCGGCGCTGGATCCGATTTCCACCAGCCGC  
ATCGAGCAGCTGGTGGGAAGAACTCAAGCGCGAGTACACCATCGTGATCGTGACCCA  
CAACATGCAGCAGGCCGCGCGCGTGTCCGACTACACCGCTTTCATGTATCTGGGCGA  
CCTGATCGAACACGACCGCACCGAAACGATCTTTTCCCAGCCGTCCAAGCAGCAAA  
CCGAGGATTACATCACCGGTCTGTTTCGGCTGATGTAGCGCCAGACATCGCAACGCCG  
CATTGACGCAGCTCCATCGCACCGCCCGGCACGACATCAACATCACGTGCGATGTGCG  
CCAAG

>CONTIG\_489\_length\_511\_cov\_0.992188

GCATGTCGTCTTCGCCGATCTGCTCATCCACCCACACCGCACCCCTGCTCGGCCATCA  
CTCCCAACTGATGCTCCAGCTCGCGCATCAGCAAGCGCACGCCGGGTTTATGGATCG  
CTGCGCCATCGCGATAGATACCCCCGCCGGCCCGCGCCTGCGAGGGCTGCTGCAGCT  
GGAAGGCGCGCAGCCCCGCCACGTGCGATATCGCCGGCCACCATCATGCTCGGCATC  
ACCGCAATGCTGTGCGGTGCCGAGCAAAATCTCGCGGGTGAACTGGCCGAGCTGGA  
ACGCAACTGATCGCGCGTGGCCAGGCCGTGTTTCGCGCATCACCTGGGCCACATCGC

GCTCCACATGCTGGCTCAACGTCGGCAACACCTGCCGGTAGGCGACCGCTTCGGCA  
ATGCGCACCGGGCCGTTGGCAAACAAGGGGTGATCGCTGCGCGCGACCAAGGCGAT  
CGGATCCTGGTACAGCACCTTGCGGATCAGCGCATCGTAACGGGGCCAGCGGATACA  
GCCG

>CONTIG\_490\_length\_511\_cov\_0.747396

GGAGGGGAACGTCAATTGGTGTCCCTGGCGAGCGTACTGGCCGTTGAACCATCAGT  
CATCCTCGCCGATGAGCCAACGACCCTGCTGGATTTGCGAAACCGGGAGATGGTGC  
GGCACGCTTTTGAACGCTTGGACCAGCAAATCCTGTGCTGCACCCATGACCTGGAAT  
TAGCGGCGTCCTTTGACCGAGTGTGGCTGTCTGAAGACGGTCTGAATTGTCAACGACG  
GCGACCCGGGGGAGGTCATTGCCGACTATCGGGCCCGGATGATGTCCGGTCAAGGC  
GGGGACGTGCCTCGACGCGGTGGACAGGATAAGAGCCGATGAAGACTGACGCTTCG  
GCGTTCTTCGGCGGATACCGGGCTGGGAACAGTCTGCTCACCGTATGCCAGTCTGG  
TCGAAGTACCTACTCGTTTTGCTCGTCGGCGTAACCCCGTTTTTCGTCAAACAGTGGT  
GGTTTTCCCTGGGTTGCCTGGTGGTGGCCGTCGTCATCAACTTGGTTGTTGCCAAGAT

>CONTIG\_491\_length\_510\_cov\_0.749347

TTGACGTAGGTGATATCGGAGTCATCGATCTGGCCCACGCCAGCGCAATACCGGCC  
TTGGCCTCGGCAGCGCTCAAGGTGACCGTGGTGCGGTACCAGGCGATACCATCCAT  
GCCGTCATAGCCGCTGGATTCCCATTGCTGGGTGGTCGGGATGCTGTCCCAATCACT  
GTCGTCGAACGTCGGTTCGCGCCACTGCGGCATGTCGCCGTCCACCTTGGGCCAGCG  
CGCGATGCGCTTGCCGGTGCCGGCCTGCGCGGCGGCATCGCGTTGCTTGATCGCTTC  
GATCGCGCCCTTATTCTGGTCGGCGTTCAACCCCAGCGAGGCCGCATCCATCCACGC  
TTCGATCGCACTGCCACCCCAGGTGCTGTTGACGATGCCGATCGGCACGCCGGTGCT  
GGCACGCAGCTCCTGGCGAAGAAATATCCCACTGCAGTGAACCTCGCCGGCATTCTCC  
GGCGTGCGCGCTTTCAGTCGCCGCCGGTCAGGCGCGCTTCCGGCTGCACCGACC

>CONTIG\_492\_length\_507\_cov\_30.942105

GCCCTATGGCCCGTGATCGCGATCTAACGTGTGCAATATCGATAAACTCCGAGGGCT  
TTACCAACCACCCAACGGAGCCAAAAGCTATGCCTGCAAAAGCCGCTCGGCGACAA  
GTTGTCGCGAACGTAGCCCCTAAGCAGATGAAAGCGATTGACCGCGATGCACAGCG  
CGCCGGACTCAGCCGACGCATGTTTATGCAACACCTCATGGAAGAATTTCTGCTGCA  
ACCCACGACCCTGGTCGCGGGCGGGATCTACCGCAAGTTAGATCGAGAACGCCTGC  
GCTTTCACCTCTCTGTTCCCATCCACAACGGCGTGAGCAAGTACGCCAAAAAACTAG  
GCGTCACGATCAGCGTCGTCATCACCACCGCCGTAGCCAATCGCTACCCGCTCTAGG  
AACAACCACATGGCCCGTCAAACATCGGCACTGCCGAAAATCCCCGTCAAACCGA  
ACGTGTCACCAAGCGACTGCAATTCGACCCAGCGTTAGTCAAGCGCGTTGACGCC

>CONTIG\_493\_length\_505\_cov\_10.134921

CGCAGGGTTGTCGCCGCGCGGGTAATGGCCTGACGCCATCGCCCATTCGAAAAACC  
CGCCTTTGCCGCCGATGTAGCTCTGCTTGTGGTGAGCGTTGGCGTCGAAGCACCCCT  
TCTCGCGCATGTCCTGATACCAGCGCGCCAGGTCCGAGCGCGTGATGGCATGGACCT  
TCATTGTGCGGCCCCAGGAACGCCACCAACGCCTCGATGGCCGTCTTCTTGATCGTGT  
AGGTCTTGGGCAACGTCGAGCCCTTGAGCGTCGCCAGGAATGCGTCACGGGCTTTGC  
CCAGCGTCATTGTTTCGATGGCCGGCGCAGAGACCAGCCTACTCGGGCCCGCATGCG  
GTGAGCCAAACATGGTTGGCGCGGCCACCGGAACTGCCCCGAGCCTGCAAGGCAGCG  
CCGGCCATCGCTTCCAGTTCCATGAGCTGCCTATAGAGCTTCAAGTCCTTCGGACTG  
TCGATCTGCCACTGCTCCGTCAACGTCCCATCCGGCTGGCGGGTGCGGTTG

>CONTIG\_494\_length\_504\_cov\_1.066313

GTATTTACCCCGAACATCCTCGTCAGGGTGGAATCCAGTCCACTTCGTAGCCCCGTT  
GGCTCGGACAAAGTGATGCGCACAACCTCCGGACAGACGTGCCTGCTTGAGAAAGTCG  
AGATACGGTCGAGCGAGATGTACCGAGATGGCTGGCGATGGCATCCATTGTCTCGC  
CCTGCATGTAATACATGGACGCAGCTGTCCATACATCATTGGACAATTCGTTTCATGC  
CTCCCCCCTTGCCATGCACATAAGTGCAGAATCGCGATTCCGTGGGGCCGTTGATGT  
TTGATTGAGTCATGTCCAGCCCCCACAGGGGCGGGACGACGGTCCCCGTTTCCCAA  
TTCTACGGGATCGGCCGCCACCGGCGAGTAAACCGGTGTCAACGGATGACACCACG  
ACGAAGGAGTCCTCATGCTTCTCGAAACTGCGGTGCCCCGCCGCAACGATCTTCGGGT  
CGGAGTTTTTGGGCACCTTGATCCTCATTCTCCTGGGTTGTGGCGTCGTCG

>CONTIG\_495\_length\_504\_cov\_0.803714

GAAATATCCCATGCTGGGTGCGATCGCGGTGTACTGTAACCCGCATGTCGTGCGCGCT  
TCCCCTGGTGTGCCGCGAGTGAGGCCCGTTGAAGGGGCGGCCTCCTTGCTGCGGGTGA  
TCGGGCTGCCCTACACATCACACACGGGAGACACCATGACGCACATTCAGCCCCGT  
CCCTGCCAGCTGACTAGCCCGATGCCAGCGGGCGTTATAAACCTTTCGTTCCGCAC  
ACGTTGCCGGACCGTACCTGGCCAGACAAGACCTTGGACCATGCTCCGCGGTGGCT  
GTCCACTGATTTGCGTGATGGCAACCAGGCGCTTGTTGACCCCATGACTCCGGCTCG  
CAAGATGCGGATGTTTGAACCTTCTTGTGGGATGGGGTACAAGGAGATTGAAATTG  
GCTTCCCCTCAGCTTCTCAAACGGATTTGCACTTCGTTTCGGCAGGTTATTGAGTCCGG  
CATTCTCCCTGACGACGTCACCTATTTCGGTGCTGACCCAGGCCCGTGAGG

>CONTIG\_496\_length\_503\_cov\_0.920213

TTATAGTGCCATGCATTTAATGCATCATTTTCATGATGGATTTTAACCTTTATATTGAT  
GGATTAAGCTTACTATTCGCTCTGTTAATTACCGGAATTGGTTCACTCGTTGTACTAT  
ATTCATCGGTTATTTGTCAAAAAAGAGCAACTGAGTCATTTCTATATATACTTATT  
AATGTTTATGACAGCGATGCTTGGTGTGTATTAAGTGATAACTTATTAATGCTCTAC  
CTCTTTTGGGAGCTCACATCGATTTCAAGTTTCTTGTGATATCATTTTGAATAATC  
GTGCTCGTTCACTATATGGTGCTCAGAAAACAATGATTATCACAGTATTTGGTGGTG  
TTATGATGCTTGGTGGATTTCATCATCATCGGAAACATCGCTGGTACATTTAACATTC

ACGAAATTATTCCTCAGTTTGAATTGATTCAAAGTACGCCGTCAATTTGGATTGCAA  
TCATTCTTATATTACTTGGCGCGTTTACAAAGTCTGCTCAAT

>CONTIG\_497\_length\_501\_cov\_1.168449

CAGGTTACGACGGCACGTTGCAGCGCGCAGGCCGGGCAAAACCCCGAGGCCAGCT  
TGAGATTGGATTCCGGGCAATGCACCACGCTCACGCCGCGCTCGGCGCATAGATGG  
ATTTCTGCCTCGGTAAGCTGGGTCATGTGCACGGCGATCAGGCGGTCTGTTGACCAGG  
CCCAGGCGATCCAGTCGCGCCAGCGGGCGCTGCCCCGTATTGCTTGATCGAATCGGCC  
ACTTCCTGCGCGGTCTCGTGGGTATGCAGATGCACCGGCAGATCGAGCTGATCGGCC  
AGCATGCGCACGCGCTCGAAGTTAGCATCGTTCACCGTGTACGGCGCATGCGGGCGC  
AAACGCTGTGCTGATCAGCAGATCGTCGCGCCATTGGTCGTGCAATTCACCGGCACG  
CGCAAAGTATTCGTCTCGTCCGACGAGGCCCATGCGGTGGGGAAATCGATGATCACCG  
AGCCCACGAGACGTAGAGGAATCTCGTATGCCGTCTTCTGCTTGAAAAA

>CONTIG\_498\_length\_501\_cov\_1.152406

GCGTCGATGCGCCTCGGTGCCACGCTCGGTACACGTAGCATGCAGGCAATGACCAT  
GGCCGATGGCATCGGTTCAGTTGCGCGGCACGCTCGCACCCGGCGCAGGGGCGCGCGG  
ACATGGCAGCGGCACGCTGGGAAGAGGTACGGCAGCGTATGCAGAGCGAGCATGC  
GCCGACATATGTCCCGCTAGGCTGGAAGATGCCTTTGGGCCCATCTGGCGGCGAAGT  
GGGTGCTCCGGCAGCACCGCGTGGTTCGGTTCGACGAGCCTGCATCTGCATCGGTTCC  
CAACGATCCGCTTTACCAAGCCATCCACAGCAAACCTCCCGCCGGCACCTCTCCAGC  
CGAAGCGATGCACGCCACTGTCTGAGGCCAAACGCGTGGGTATCCTGCGTGTCTGATC  
AGTTGCAAAGCGTGACCTCGCATCAGGACGCGGTTTGGATCGTCGGCCAGACACCG  
GGCTTCCGGGTCAAGGTGGATCTGTCCGAGACCGTGCCTCCATTGCAGGAA

>CONTIG\_499\_length\_501\_cov\_0.893048

GACCAAGGGACGCTCACTGGAGGAGATCGAGGTGAGATGAAGCAGCGCTACGCCT  
AAGGGGCGGTCCAATACTCGATCCGCCCCGAAACCGCGATTGAGGAGGGTTG  
CCCCTGTTCGGAAGCGGTTTGTACTGCGGCCCGATAGGATTCGAACCTACGACACAT  
GGTTTAGGAAACCACTGCTCTATCCCCTGAGCTACGGGGCCCTGCCATAAAGGGCC  
TACTAGAGTAGTCCGGCAGGGCCGCCTGGACCAACCTCAGACCCCATAGTGTCTGTA  
AAACCAGGTTGTCGACGGTCCCGTCGTACCTGCCGCCAACTCAGCTGATTCGCCGCA  
ATCTATCGAGCAAAGCATGGCGGGTTATCCGGAGTAGCCCGTCTTGACCCGCGTCGG  
GCTGGGCAGGTTATCTCGATCAGCCGACGAGCTCGTGGTCTTGGAACCTGGCGCAC  
CGACGACGTAGTGGCGTGCTCTGGCCTGTCAGTGGGCTCTTCTCGGT

>CONTIG\_500\_length\_497\_cov\_42.327027

GGGGCAATCGTCGGGTTCCTACTACCGCCACTGCTGGTGGTTGTGGCTCCTTTCACA  
GCCGTGGTTGTTGCTTTGGCGACCGTTGCTGCGTCGCTGAATCGCTGCCTGCCCCGCTT

CCAGCCGTTCCGGCGATGGCGTGGGCGGCGCAGGCGGTGACGATGCGGTCGGGGAA  
ACACCGCCGCCATCGTCACGCCCTGCGACCAGGCATCTTTCACGGCAGCGCCGGCA  
TTGGTGACTGGCGAAGCGGCCATTCGGCCCCGCTTGGGTACACCGGCTGCGGCGTA  
GCTGGCACCAGCTGACACACCGCGATCGATGTTGGCGGCGGCAGCTGACCCGAAC  
TCATAGCGGCCTGGCCTAGCCGGGTGCTTGCGGCACGTTGAAGTCCAGCCGCTGCGG  
CTTGGCCGGCCGGCGTGCTTGCGGCCATCAGCCCAGCAATTACGCCACCACGCA  
CACCCGGATTACTCAGTGCGGCCGCACCAGCTCCTGTGCTGTT

>CONTIG\_501\_length\_497\_cov\_0.778378

GCGTGCCCACCACCTTGAAGCCGTCATCGGAGAGTTGCACGTAATCGCCGCCGCTCA  
GAAACAGATAGCGCTTGCCGTCTTCGCCCACTGCATGGCCAGGGTCGATGTACTTGC  
CCAGGCCGATGTCGATCGGCGCGCTCCACGGGCCCCTTGATGTCATCGGCCCAGACCA  
CGAAGTTGCTGCGCTCGCCCTGGTCGCCGCGGCGCGCGGGGAAATAGATGTAATAG  
CGCTTGCCGTGCTTGATCAGATCCGGCGCCCAGATCGCGCCGACGTTCTGCGTGATC  
GCATGGCCCAGCGGTTGCCAGTTGACCAGATCGCGCGAATGCCAGATCGGCAGGCC  
GGGATACGCATCGAACGAGGACAGCGTGAGGTAATAGTCGTCGCCGTCCTTGAGCA  
CCGACGGGTCAGGGTGATCGCCGGCCAGCACCGGGTTGAGGAAGGTGCCGTTGCCC  
TGGTCGGCAATGCGCTGCTGTTTCGATACCGCGCTTCCAGTCGGCT

>CONTIG\_502\_length\_495\_cov\_0.760870

GCATCATCTTGCTGGCCGGTGGAGTCGATGACGGAGAGAAACGCATCGTTGTCGAG  
AACGCGAAAGTCATTGCGTCCGCCAGCTTGGGGTGCCAGTGGTCTATGCCGGAAAT  
TCCCGAGCGAGGCGGGCGGGTCGAGCACATTTTGGCCGATGCCGGCCAGCCGCTGAC  
ATGCGTTGACAATGTCTTCCCTGACGTCGACGTGCTGCGTGTCGAACCGGTGCGCGC  
CGTCATTACGACGTCTTCAACGACATCACCGCTGCCCCAGGCATGCACGGCCTAGT  
TGAGCTGACCAACCACGAGATCCTGCCAACCCCAGGAGCCGTACTGCTCGCCACTG  
AGTTGTTTCGCCGATGCTGTGGGCGATGCGGTGGTGGTCGACGTTGGCGGTGCCACAA  
CTGACGTTACAGCGTCACCGACGGGTCTTCGGAGTGGTCGGCTCGGGTGATCGACC  
CCGAACCACGTACCAAGAGAACCGTCGAGGGAGACCTCGGCG

>CONTIG\_503\_length\_495\_cov\_0.730978

ACGTTCTGGAGGACGATGCTCGCGCTGACCTGCTGCAACTGGCTGGGGGAGACGCA  
CGACGCGCCCTCACCTATCTTGAAGAGGCCGCTGCCGGGGCGAGTACGGCAGGTAC  
TGACACGATCACGAGTCAGATCGTCTCCACTGCGGTTGATCGTGCCGCAGTGCGCTA  
CGACCGTGACGGCGACCAGCACTACGATGTCATCAGCGCTTTCATCAAATCCGTGCG  
CGGCTCAGACGTTGACGCCGCACTGCACTACCTGGCCCCGGATGATTGAGGCAGGGG  
AGGATCCCCGATTTATTGCGCGGCGCCTTATCATTCTCGCCAGTGAAGACATCGGGA  
TGGCCGCCCCAAGTGTGCTCCAGACCTGTGTGCGGGCAGCCCAGGCCGTCCAACCTGA  
TCGGGATGCCCCAGGCTCGTCTCAACCTAGCCCAGGCCACCATTGCCGCAGCCACCG  
CTCCGAAATCCAACGCCGTCATCACCGCTATCGATGGGGCCC

>CONTIG\_504\_length\_494\_cov\_0.806540

GGTGAGACCTCGCCTGCACCCAGAGGCTCTCGCAAAGACCGGCTTCTGGCGTGACG  
CACCGCGGGACACCCTCGCCCTTCCGCACGGAGCCGAATAGCGATCGCGAGGCAGC  
GAACTCCGGCAGCTCTAGAGCGTCCGACGGCTCCGGGAGACCAGCCGATACCGCGC  
TCTTATGTCAGATTAGAATCGGTAGTTCCGCCTTGTCGACATGCCAGCGAGCGGGAG  
ATGAGACTGCAAAGGGTGCGAGGAACCGGGGGGAGCATTTACGGTGTGTGCCTGAC  
GCTGCTGATCGTGCTTCTGATCTTCCTGACGCTGGTTCGTGACGCTGAACGTCCGACG  
AGCGTGGATTGCGCGACAGTCTCAAACGGCGAACGACCCGTCTGCTCCCGTCGCAG  
ACGCACTCGAACTCAATGAGCCATCGCTAGGCGCAGTACGCATCGACACCTCGCTC  
GCTGTAGTGGACCTTCGTCCACTACCCGCCGTACGATTTTCGGAT

>CONTIG\_505\_length\_493\_cov\_0.669399

CCATGCAAGGCGACACCGTCGACCTGTTGTGCTGGCGCCACCTCGGCAGCACGGCC  
GGCCTGGTCGAGCGCACCTATCTCCTCAATCCCGGCCTGGCCGAACCTGGGCGCTGTG  
CTCCCGCACGGCACGCCGGTGGAGTTGCCCGAGGTAACCACCACCACAGCGGCAAT  
GACGCCGCTTGTGCAGCTATGGGACTGATCTGATGACCGAACCACCTCCGTATCGA  
GCGGCTTTTTGATCGCCACCGGTGTGGGCCTTGCCCTCCGTGCTGCCTGGCATCGACG  
GCGATGCGCTGATCGGCGCCTTCGCGGGTGGCGCGCTGTTTCGTGGTGTCCGCCGCCA  
AGCAACCGCTGCTGGCGCGGCTGATCTATTTCCCGGTGAGCGTGATTGCCGGCTACC  
AGCTGGCGCCGGAAATCCTGCGTTGGTTGCCGATCAAGTCCAGTGGCGTGGCCGCTT  
TTGCGAGTGCCGCGTGCGCCATCACGGTCACCCTGGGCC

>CONTIG\_506\_length\_492\_cov\_0.819178

GTTTCGAAACAGTGGGGCGTGGCCAGTTCCGCCCCCTCAACGGGTCTCATCCGGCCC  
TCGGCACCAACCAACCAGATTGAAACCGTCGAGGAAGTACGCATCCATGTCGTCGCG  
CCGACCGTCATACGCTCCACGGTACGCAAGACCCTTGTTGATGCTCACCCCTATGAG  
GTTCCCGCCTACGATGTGAAAACCATCGACTCTGGATCCCGCCCTGGCGCTGCCACG  
CCAGGAATCGGGCGCGTCGGGCACCTCGACGAGCCAATGACCCTCCGCAGTTTTAC  
CCAGCGCGTATCCGAACGGCTCCCCCGCACTGTGTGGGGGGTTCGAGCCGCAGGTA  
ACCCGGATCAGCTCGTTACCACAATCGCTCTATGTTCTGGTGCCGGAGACTCTCTCC  
TCGACGCCGCGGCAGCCAGCGGTGCTGACGTCTACCTACTAGCGACCTGCGTCACC  
ACCCGGCTGACGAGCATCTTCGCGCCAACGGCCCTGCCC

>CONTIG\_507\_length\_491\_cov\_1.648352

CCTCGAGCGGAGGCACCAAGTACCGGCCAATGCCAACACCTCAGAGGCGTTCGCCCCG  
GATGACGGCTGGAGCGGCGACGTCCAAGGTATCCAGGGCCACCCGAGTGCTCCATG  
GCATGCCTACCCCCACCGGGTCAAGTACCATGGTGTGTTGCTGCTTGCGGCACCGC  
GCGCAGCAGCAATCATGGCCTCAGCGGTCTCCCGGTAGGGAGTTCCGGTGTTGACG  
AGTACACCGTCGGCAATGGAGGCGAATCCCTCGGATTCCTCGGGATTGTCAACCATG

GCAGGAACCGCCCCTGCAGACAGCAACACGTTAGCGGTGAAATTGGCCACGACGAT  
GTTCGTCAGGCACTGCACCAGCGGCTTGTCTCGGCGTAGTCGCTCTACAGATTCCGC  
CACCAAATTCGACAATTCAGTCATGTCAACCACTCCCTTCGCCGGCATGACCCGGAC  
AGGTTCCGGCGGTTCGGCACCTTCGTGGCGCCCTCTCAGC

>CONTIG\_508\_length\_491\_cov\_0.890110

TCGCGGCAATACGGGCCGGACATGACGAAACGGCGGCAGATGGCCGGCCGTGTGTC  
GTAGATCGAGCAACACATGCGCGCAGCATCGATGGCCACGCACCAACCTTCCTCGT  
CACGCGCCATCACGTGCCAGCCTTGCGGCGTCACGGTGGTCAGATGGTTTGGAATGC  
GGTCGGTTGAGTCGACCATGACAGTGAGCCGGCAACAGACGGCGTTCGACGCGTTTCG  
CAGAGATTCTTGATGGAGAAGGCCAGATAGTAGTGAAGGCGACACCGGGCTCCGGC  
CGCCTCTGCACCATAACCCCTGGGCGTGCCGGGGTGTGAACCGTGCCCCCGATTTCG  
CTTTGCAGGGCTTGCGGTTACGCCGCGGCGCAGGCGATGCAGGCGATGCAGGCGC  
GCCGCGCAGCGGGCTTGTGGAATGCGTTGCCTTTGTCGCCTCGATGCGAAGACCGCT  
TTCACCTACATCATCGCTGCGTCGCCGTAGCGTGTGCGCAG

>CONTIG\_509\_length\_491\_cov\_0.777473

ACCAGCGACGACAACGGCAAGCGCACCATCAAGGCCTTCCGCGACCGCTTCACCGA  
ACGTGGCGGCAGCGTGGCCGGCAGCATCAGCGTGGCCGAGGTGCCTGGCGATATCG  
GCGCGCAGCTGCGCAATTACGGCACTGCCGATGCGGTGTTTCCTGGCGGTGCGCGGC  
AATACGGCGCGGGCGCTGGCGCCGCAGCTGGCGTTGAGCGGATTTCGCCGGCAAATC  
GCGTGTGGGCACCTCGCAGTTGGTGGCCGGCACCGGCAAGGTCGAAGACGACCTGG  
CGCTGGACGGCATCATCTACCCGAGCGAAACCTGGACCGCCCTTGGCGTCTCCGGCC  
TGCCGGCCTCCACCCAGGTGCGCCAGCACGCTGCCAGCGCACGCGGACCGGGCGCA  
CGCCTGTTTCGCATTCGGTTACGACGCCTGGAATATCAGCGCGTATCTGGAAAAGCTG  
GCCACCGGCGCCGACGGCGGCCTGCGCGGCGCCACCGGCAC

>CONTIG\_510\_length\_491\_cov\_0.769231

ACGACCATCTCACCGCACGGGCGCTGGATACGCTGGCCGGCATCATTGAAGTTGGC  
GGCCACCTGCTGCGCCCGGGCGGCAGCCTGCTGGCGATGAAGGGCATCTACCCGCA  
TGAAGAGATCGCCGCACTGCCCGCCGGATGGACGGTGGGCGAGGTGCACCCGCTGC  
AGGTGCCCCGGCCTGGATGGCGAGCGGCATCTGGTGGTGGTGCGTAAGGCGTAGCGA  
AACGGGTGCATCAACCGCGCGCCGACACACAGGCGCCTTCGGTCCGTTGGGTTCGGC  
GCGTGGCAGCTTGGGCAGCGTATGTCAGGGTTGATTTACACCCGTCGTTGGGCGGTA  
GGTCGGCAGCTGGTTGTCCTCGCATTGTCTGAGCTATCGCAAGCGCCCGACTGCAAA  
CGTTAAAACCTGCGGTTGCGGCAAACCGAACTGGACCAGTAGTCAGTCTCACGCTG  
GGACTTCCGGCCCCATGGCAGCCGCCGCCCGGGCTGCCATTC

>CONTIG\_511\_length\_490\_cov\_0.741047

ATATGAGCCAGGCCCCGAGCACAGAAGCATCCCTTAATAGACTGAGAGCACCTAAAT  
TTTCAGGCGGGAGGATTGGCTCCAGCATATTGCGAATTGACTCACCATATTTCAAAT  
TCTTTATTAAGAGACAAAAAGCCTCAACTCCAAACCATAGAAATATGACTGCGAA  
AATAAGTAAAATTTATCTTTTCGACATTGATAACCATGGTGGCCTCTATACCCATCA  
CAGTAGTCATGACTTAGGCCGCCACCCAAGAGACCACCAGCAAACCTGACCCCCCTC  
TAGAGGGCCTGTCACACATCTCCATATCCCTATCTGCTCTCCTTGGTACCTACTATCT  
AACTGATATCCATACTCTAGACAGTCAGCAACGACGGGCATTTGCAAGCGCCTAAA  
GACGGAAGCATAGTGCCCCATAACCATAGACTTACCAATATCCCCGGGATATGAGT  
CAACACGCCTACCTTCAGTCCATGGGTCCTCCACCAAT

>CONTIG\_512\_length\_488\_cov\_0.806094

GGATGAGTCGCGGCGCGTGGACTCTCGAGCACGACGGAGGCGGAGCGTACCCGTAC  
CGCGCGTCGCTACGCGGCGCTAGTGATCGACGGACTGCGCGCGTCCGACCGGCACA  
GACCGCTACCTCCCGCGCCGACTCATCCCGAGTGTCATCCCGGGGTAGACCGCGTG  
CTCCCTGACGACGGTGCGGACGACTACCAAGAGCCGGGACCTGGCCGGGACCTGAT  
GCATGCAAGCCATGCAATCCCTGACATGAAATGACGCCGTTTCGAGGGGCAGAAATG  
CCCGGAAAATCAAGGATTCGGGGCTGAACCGTCTACCTGGGGGTCAAGGGGTTCGAG  
CTTCAAATCCTGTCAGCCCGACCAACAACGACGAAGCCCCGACGAGGATCACCC  
TCGTCGGGGCTTCGTCGTTCTCACCGCCTAGGCGGCCAGATGCCGGTGCGACGTGGG  
GCGGCATCCGCCCCACGTCAACCCCTCGGTTCGATCCG

>CONTIG\_513\_length\_488\_cov\_0.662050

GGTCGATCCAGTCCTGCAGCGCGCTCAGCTGCGCGGCGGTGGCGTGGCAGCTGGTG  
AGTTGTCGGCGATGGTACCGGCAATGCCAGAGAGCGTAATGCCGGCGGCGGCGCA  
TCAGGATCTCCGGTGGACGGCCCCGGCAGGGTTGCCCCAGGCGGCGGCGTTCGTGCAG  
CCGCACAAAGCCAGCAGGGATAGCGCAAGCAGCATCTGCTTTTGGGTGACATAGA  
TCGGGATCTCGCGAGTGATGGTGGCGCCGACTTCGCGCACGATCTGCACGCGGTTCG  
ACGTACTGCGTCACGACGGTGGTGGAGCCTTCGGCGCTGTCGCGTTCCGCTTCTGCC  
TGGCGCTTGACCTGCAGCGCTGCATCGCGGTCTTTCTGCGCGGCGCTGACTCGCTGC  
TCCTGCCACACGCAGCCACCGACAAGCACTGCAATCAGCGCCAGCAGAATGATCAG  
GCGCGTGACCATCAGCTCACGCCAGGATCTGCAGGGC

>CONTIG\_514\_length\_488\_cov\_0.623269

GCCGAAGCCGCCGAGCATCTGTGGCAGCTCCTCATGGACGCTGGCGGCGAAGATCT  
CACACCGTGTGGTCTCGCCTGCCGTGACACTTTGCGCCTGGAAGCTGGGATGCCTCT  
CTACGGACACGAGTTGGGCACCGACATCCATCCCTCTCAAGCCGGGCTTGGGCGAG  
TCGTCAATTTCAAGAAGGAGGGCGACTTTGTGCGTTCGCTGTGCCCTCGAGAACCGCG  
ATACCACTGCCGATCGTGTGCTAGTCGGGCTGACCGGGGAAGGACGCCGAGCCGGG  
CGTGCCGGATATGCTGTCGTGAACGAAGACAAAACGGTTCGGAGCCATCACCTCCGG  
CATCCTCTCCCCCACTCTGGGCCATCCCATCGCAATGGCTTTCGTTGATCCTGACGTC

GCCAAGATCGGCACCTCGCTTAGCGTTGATGTGCGGGGCAAAGCCCTCAACACTAC  
CGTCGTCGAATTACCGTTCTACAAGCGGTCCTGACC

>CONTIG\_515\_length\_487\_cov\_1.019444

GGTCTGCCATCGATGGTCCCTGGCTGGCGTTGACGGCAACATCTGCAGCGCTCGCGG  
TGGTATTGGGCGCGTCCGCTGCCATCGCCGCGTATCGCAGCGCACACGCGCAGCATG  
CGTTGGCACAACGCCTGGAAGACGCCGAGGTCGCCCCGCGAGCGCCTGCAGCAGGAG  
CTGCAACGCCAGGGCGAACTCGAGCAGGAACTGCTGCGCGCCAAACAGGCCGCCGA  
GGCCGCCACGCTGGCCAAGTGCGAATTCCTGGCCACCATGAGCCATGAGATCCGCA  
CCCCGCTCAACGGCATCATTCCGATGCTGGAAGTATCTCCAGCGGCCAGCTCAGCC  
TGGACCAGCGCGACATGCTGCAGACCGCCACCGGCAGTTCGCTGCAGCTGCTGCGC  
ATCGTCGACGACATCCTCGACTACTCCAACTCGAAGCCAACAAGCTCGAACTGGA  
GATCACCACTTCAACCTGCGCGAACTGCTCGACGG

>CONTIG\_516\_length\_487\_cov\_0.738889

CCTTCCTCGAGGCGGCGTCCTGAGTCATGATGACCTTTACGGTGGAATCAGTGACGT  
CGTACCAGCGTCCGCCTGCTTGCCGGACCAAACCAGCCAGGAAGTTCCGGTCGGAG  
CTGAAGTAGGTCAACGAGGCCTTCGGGTCGGCTTTCTTGACAGCCCGAGCTGCGCTG  
GCGAACTCGTCCCAGGTCTTGCGCGCCTTGATTTTCAACGAGTCCAATAAGGCTTTG  
TTGTAGATCATGGCCATTGGCGCAGTATCCACTGGGATTCCGTAGACGGCACCGCCG  
AGATTGACGGACTTAGCACCAGCTGCGGTGAAATTCTTGTCGACGTCACCAGCCCAT  
TCCTTGATGTCTTGAACCGCATCTTGGATCACAAAGGAGGGCAGCGCCTCGTAACCT  
ACCTGAGCGAGGTCGGGAGCGTTGTTGGCTTTGACCGCCGTGAGCATCTTCGGGTAA  
ATCTTGCGACTGGCTTCGGTGGCGATCCACGT

>CONTIG\_517\_length\_486\_cov\_13.395543

TGCGCATCACCGCCACTTTGGCTTTGCCCAAGTGCTTGCCAGGCGGCGCGTGAGTT  
CGCGGGCGCGTTCAAACCTCTCCATTACGCGCGGCTTCGTGTGCTTGTGCTCGGAGAC  
TGCGATGATCTACCCGAGCCGGGGCGCCCGCATTTTTCAAGTGCGCATTGATGACCA  
TTGAAATGTCTTTGCGGATTTGCCGCAGCGCTCGTGTGCCGCCGCCCTTGTCGCGCATC  
AAACTCAGCGCAGGCGCGCTCCCCTAATCCTCCCGGTCCGACCTGCCTGGCTGACAT  
CAGCAAATGCACATGATGATTGCGCTGATCACCATATTTGCTTGGTGTGTGCACAGC  
GACCAATACGGCGACTTTGAACCGATTGACGAGCAATTGGCCAAGCGCCAAAGCGA  
GCGCTCTCCGTTGGTGTGGATCGAGTTGATGCGGAAGCGACACCTCGACTTCTCGGC  
AAACGCGTGCGTTCTTGCGAGTCTCGGCCG

>CONTIG\_518\_length\_484\_cov\_0.731092

GTCACCCACGGCACGCGTTTCCTCGTCAGCGAGTTCGGTGCGGACGCACCGGACAG  
CATCGCACGTCTCGCCGGACTCGTCGAGCCCGACGTCGCCGTCGTCCTCATGGTCGG

CATGGCCCACGCCGGCGGGTTCGGAGGTATCGAGGCGACGGCGAAGGCCAAGTCCG  
AACTCGTCTCCGCCGCGATCGCGAGCGGAACGGCCGTCCTCAACGTCGACGACCCC  
CGCGTCTCCGCCGATGCGCGGGCTGGCCGAGTCCCGCGGCATGACCGTGGTCGGCTTC  
GGCCAGAGCGATGCCGCAGATGTGCGCGCTCGCGACCTCGAGGTCACCGCATCCGG  
AACGTCCTGCGTGATCGAGACCGGCGGAGAGCAGCTTCCCCTCCGGCTGCGCGTGCT  
CGGCGCTCACCATGTGAACAACGCCCTCGCCGCGATCGCGACGGCGGGCGTGCTCG  
GGGTGTCCGCCGCCGATGCCATCGCTCGCCTCG

>CONTIG\_519\_length\_483\_cov\_10.306180

GGCTGGTTGGCCTGGTTGCGGTGTACGCGTTGAGCAAGCTCGCCGGCGAAATGGTCC  
GCACCTGGTTGGAAGATCGCGGCGAGATTTACCTCGCCGTTGATCGCCTAAAAGCC  
GGGAATCCGTTTTGGCCGGCGGCGTTGATGACTAAATTCTCAGCCACCACAAGCCCA  
TGAAAAGGGTAAGCAGCACCATTACGATGATTGCGACCCTCTTGCGGTACTCGAAC  
GGCGTCAGTAGGCCAAGCGTGACAGCATGTGCGGATAGGATGAGGTTTACCACGGC  
AACGGTAAGACTCGCGGCCGTGAGGAACACCAAAACGGAATATAGATTCATGTCGG  
CTCCTTTTTGTTGGATTTCTGATACGCCCAGGGTTTCCTAGACATCTCAAGGCCATGG  
AAAATAGTCGATTTCGGAGGTGTCTATGAGCAGCAAGCGATATACGGATGAGTTCAA  
GATCGAGGCGGTCCGGCAAGTGACTGATCG

>CONTIG\_520\_length\_481\_cov\_1.762712

GGTAGAGCTTGAACAGCGTATGGATTACCCGGTCCTGCTCATCGGTGAACCAGCCAT  
CGGCGCTCAGGCCGATATCTTCGATGGCCACTTCCTCGGTGCTGATGCCCACCTGGT  
GCGCGCAATCGCGCAGATACCGCACCGTGCGCGATCCTCCAGCGAATCGCGTACC  
GCTGAAAAATGCATCTGCGGCCCGATCGCACCCCTCCACCGCCAGCGCGCCCAGGGT  
TTCGCACAGCAGGTCCTGGATCAGGTTGTACTGGTCGGTGCCCTTGGGCAACGCACC  
GGCGGCGATCTGTTGCTCCAGCCACAACCACTGGAAATACGCCGATTCGTACAGCG  
AGGTGCGCGTGTCGTAATTGAGTTCGTACAGCTTGGCCGGGCCGTCGCCGGCATAGG  
CCAGATCCATGCGTCCATACAGATGAGGGTCGCGGTCTTTCCACGAATTGGCGATCC  
AGTCCCAGTAGAACGGCGGGATCGCCAG

>CONTIG\_521\_length\_481\_cov\_1.197740

GCAACCACCATCGCTGCCATGCCGATCAGAAACAGCAGGGCCAGCGTCTTGCGCGA  
CAGACCACCACGCTGCGGCAGGTCACGCCGCCGTTGCTTGTTCTGGAAATCAGCA  
AGCATCCAGAAAGTTGCGCACGGCCGGACCGAAGCGCGCGAAATCGACCAGGAAG  
GCGTCGTGGCCCTGTGGCGAATCCAGCCCGAGAACTGGGCATCTGCACCACCGGC  
GCGCAAGCCTTCGGCGATCTGTTCTGTTGTTGTACGGGAAACAGGATGTCGGTATT  
GGCCCCGATTGCCAGTGCGCGTGCGATGCGGATCTGCGCCAGACCGGCCAGCACCG  
TGGCGTCGGTGGAGACGCCTGTGTCTGGCTTGGCGGCGAGGTGTGAATTATCGACTT  
GCTGGCCATCGACTCCGGCGTCAATGACCGGCTTGTCGTCGACATACTCGGCCAGAT  
CGAACCAGTCCATCGAGCGGCTCAGATACAG

>CONTIG\_522\_length\_481\_cov\_1.146893

CCCGGCGTCGCATGTCTGCCATTGGAGGGTGAATATGCAAGTGCACTACTACGGCGG  
CACAGCTGAGGCCGCGGCACCAGTGAGGAGACGGTGGAGACGCCAACCGGCCTGT  
CCGTCAATCAGTTACTCGACCACCTTCGTAGCCTGCACCCGGGATTGGGACGATTGC  
TGGGAGTGTGCACCCTGTTCGTGACGGATCTGCTGTCCGCGGTGAACAGATCGTGC  
CCGCAAGAGCCCAGGTCGAGGTCCTTCCACCATTTGCAGGAGGGTGAATGCACGCC  
AAGATCAGTGACAAGCCACTGAACGTCGCCAAGGTCGTCAGCTTGGTGAGTGACGA  
CCGCAGTGGCGCTGTCGTGACTTTCACCGGAGTGGTTCGCAACCACGATGGCGGCCA  
GTCCATTACAGCCATCGACTATAGTGCCACCCCCATGCCACGCAGATCTTGGCAGA  
CCTAGTCGAACAGTGCGCCACGCGCGAT

>CONTIG\_523\_length\_481\_cov\_0.861582

GTTCTGTACCGAGAAAGACCCGAGGCGACTGCCGTCCCGGTAGTAGATAAACGAGG  
TGTTTCGTCTGGAAGTCGCGGTTAGGGTCGGGAAGCTCGGTGCGCTCATAGGCGACA  
AAGACCCCAACGCCGGCGATGAGCACCAAAGACAAGATTGCGATCAGCAGACCCCG  
GAAAACTTGCTCAGCCTCGGGTGACGGCTAGGTTTCCTGGCGGCCCGACGAGCCCT  
TCCGGCACCGCCCCCGGTCGCGGGGGCGTGCGCGCTTCGATACTCTAGCGGGTTTGTG  
GTCAGCCATAGATGTCCTCCACGGTCGGCTGATGGCGAGGTGGGCGGGCGGCGTCGA  
CCGTCACCCAGGACGTAGTCGACGAGGATGTGATTCCACAGACAGTCGGGGCAAAC  
CTCGACCTCGTAGACGTGAAACTCGCCGAAGTGGTGCTCCATCTCCTCTAGTTCGTC  
CAGGGTACGGATGCGACCCGAGTATTGGCC

>CONTIG\_524\_length\_480\_cov\_0.804533

GCGCGTCGGCCGGGACCGCCTCGCAGACATCCGCGACCTGCTCGCAGGCCTGGCCC  
GCTGCCATGCCGGGCAGTCCGCCGATGCCGACGGTCTGCATCGGCCGGCAGCGCAG  
GGGCGGGGTGTTCGTCCTCGCGCCAATAGGTGCTGTTGTCGAAGACGCGGCAGGCGA  
ACAGTGCGGGCGGCGGCTCGGGCGCGTCGTCGTCCTCGCGCGGCGTCACCGGTTTCG  
GCGGCAGGCAGGCGCGAGATCAGCGGCACCTGCGGCGCGGCGACCGGCGTCGCGG  
GCGGCGATACGAAGGCGGGCATCGGCGCGGCCATTTCCACCACGCGGCGTTCCTGC  
GTATGGCCGGCGGGGCAGGCGGTGCCGTTCTGGAACGTCACCGCGCCGGCCGGATC  
GGTGCAGCGGTAGATCACCGTGGTCACCGCCTCGCTGCCGCCACTCGCCAGCGCGC  
ACGCGAGCGCGACGGCTCCCACAGCCCTGCGAT

>CONTIG\_525\_length\_479\_cov\_0.758523

CTCGAGGTGGGTGATACCGTGACGTCGAGCGATGCGACTCCAACGATCCAGACGGT  
CAAAGTCGAAGCTCCAGCGGTGCCCCGACGGTGCACGACGACCAGCTGAGTGGCC  
AGCGGCGGACTGGTGGGATCGACGTCGATAGGAGGGGTGAGTATAGGGGTGAACAG  
GGTGTGACACCCGCGCTGGCAGCCAGCTCGACGGCTTTGTCAATGAGGTCCCAGTG  
GCGCTCATCGAAGGCCTCCACGCCGACACGCCTGAAGCGCATCAACGTGGATCC

ACTCGGAGTGGTGGGAAGCTCGCCACGGTCCCGGTCAACGAGACCACTTCGAGGGCGT  
TGCGTGCGCTCGGCGATGATCCCGTCGTCGTCGACAAAACGAATGTCTAGGGTGTGA  
CTTCCGGGGTCAAGTGGGGCCGTCAGTTCCACCACCAATGACTGCCACTGGTCAGGC  
AGGAACCGGGTCCCGAAGCGTCCTAGCG

>CONTIG\_526\_length\_478\_cov\_1.276353

GAATAAGCCCAGTGCGGTACTCAGATGCCAGAGCCCCAAGGCCGCCAGAACACTA  
ACTTGGATGACGAAGAGCCCAACGGCCAGAAGCCAGGAGCCGCTCCGGTTGAGCAG  
ATGAACGCCACGGCCGCACGCCAAAAACGCCACCGCCACGACGGTGCCAGCTAGAC  
CACTGAAGGCTGACGGTACGCGGGGTCTGAACGATGACGGTCATCACTAAGGTCACA  
AGCAGGCCGACTATTGTAGCCCATAGCAGCCCACTTCGGTAAACACGGGACACGAC  
ACGAGATGTCACCGGCGCACGGCGGTCAACGCGGGCATGACTCATGGCGAGACGTG  
CCATCTCATCATCCCCCGTGATCACGGCCGCAGATTCCCGTGGTGAATACGCAGGG  
CATCTGGAAGTCGCAACGCGACGCTATGAATCGAGTGGCGGTATGCCTGCTGAGGA  
CATCCTCGATGAAAAGGTAACACATGACG

>CONTIG\_527\_length\_478\_cov\_0.829060

TTCTTCCTTGATCTGCTCAATCGTGCCCCAGGCGCGCTCATACTGGGCACGCTTCTTG  
GACAGGATCAGACGACCTTCCTTGTCCTCCTTCTGCTGAACGAGGGCCTCGATCTCA  
TCACCGACGTTGACTACCTCAAAGGGGTCCACGTCGTGCTTGATCGACAACCTTTTG  
GACGGGATGACACCTTCGGTCTTGTAACCGATGTCAAGGAGGACCTCGTCGCGGTCC  
ACCTTGACGACGGTCCCAGAGACGATGTCGCCGTCATTGAAGTACTTGATGGTGGCG  
TCCACAGCGGCCAGAAAGGCCCTCCGGGCTACCAAGGTCGTCAACCGCCACGGATCC  
ATCGGCGGTGTTGGCGACATTCTGCTGGTCAGTGTGACCGGGTTCGAGGTGGAGGC  
CTCAGTGGAGGAGGTCATGTAGTAGGACTCCGATTGATGTTATATGGCTTGAAACAC  
GCCGCAGCCCCGACCGTGGGGT

>CONTIG\_528\_length\_476\_cov\_13.369628

ACAGCCGTTGCCCCGGCTGATGTCCAATGTATTTCATGCAGGGCAGCTGATCGTCAGGA  
CGACCGTGCTCGGCGGCGGCTGGTCCCAGCAGATTGATCTCACGCTTGCGGTTCCGG  
TGCCTGTTGCCGACGGCACGTTGACACTGGTGGACGCCACACCCGTGCCCATCAATG  
GGATGGCCACCCCACTACCCGCCGCTCGCTTTACGTTCAAGTTTCAGGGCGGCGGCT  
AGCCAAGCGATCAATCGATCTGAACAAGCAGTTGCCGCCGCTTACTCTAGGGACTTC  
CGAGTCAGAGGACCAATCAAGAACTTGTCGTCCACCGCACTGGCAATAGCAAAGTG  
AGCTGGGTTCGACGTCCCCCACCCTGAGTAGTGGCTTGGTTTAGAGTCCGGGGGT  
ATGATATCGGTGTTTGCCAGATGTTGGGCATAAGCAGCCGGGGTCATGCCGCCGATC  
GCCTTCTTGGGTTCGGTCCTCG

>CONTIG\_529\_length\_476\_cov\_0.879656

CCCGTGGCCGCAACGCCGCCCCGCCAGCGACGCCGATGTGCGTGCGATCGCCAAG  
GCGTCGGTGGAAACCGGCACCGCTGTCGGCGCCGATCCCGGTTCGAGGGCCAGGTCGA  
GGAAGAATTGATGCCGCGCGCGCAGCAGGAACAGGTGCGCGTGCGTGCCGACCTGC  
TCGACCGCCTGGTCAACCACGCCGGCGAAGTGGCGATCTACCGCTCGCGGGCTGGAA  
CAGCAGATGGGTGCCTTCCGCGGCGCCATGGGCGAACTGGATCGCACCAACGCCCG  
TCTGCGCGACCAGTTGCGGCGTCTGGATCTGGAAACCGAAGCGCAGATCGTGCGC  
GTTATCAGCGCGAGCAGGTCCAGGGCGAGCGCACCTTCGTGCCGCTGGAAGTGGAC  
CGCTTCTCCACCTGCAGCAGCTCAGCCGCGCGCTGAACGAATCGGCAGCCGACTTG  
GGCGGTCTGCAGGGCGTGCTGGAAGAT

>CONTIG\_530\_length\_476\_cov\_0.853868

GTTCGTTTGCGAACCCACATTCGCAATCTGAAATGCCGCATTTCCAACAGGAAGAG  
CCAGGTATGAGCGCCGAGACTATGACGAGTGACACCACCGACCCAAACGGGTACGT  
CATCAGGGAAAACAGGACATCACTGCACGTCCTGACCTAGCCCGCACGACCGGCC  
GCGTTACTCCCACCCGTACCCGCAGACCCGTATACCTCGACATGCTTCCTCCCTGTA  
ATGCTGGCTGCCCAGCCGGCGAAAACATTCAGGAGTGGCTGCGCCTCATCAAGGCC  
CACGAAGAAGAGAAGGCATGGCGTCAACTGACCGCCGACAACCCCTTCCTGCCAT  
CCACGGTTCGTGTCTGCTACCACCCCTGCGAAGTGGCCTGTAACCGCGCCGACCTCGA  
TGGTGCCGTGTCCATTCCTCCGTGGAGCGCTACCTCGGTGACCTTGCCATTGAAAA  
GGGCTGGACGTTTACCAGGCCAC

>CONTIG\_531\_length\_474\_cov\_252.207493

AGGCGATGGCGTGTTGAGCGAGGTTTCCGAGTGAAAGCCCGGCGTTTTGCCAAAGA  
CAAAGGCGACATCATCTTGATGATCACTTTGCGGAGTTCATCCGCGCGTTTCGATCC  
CTGACTCTTTGACGACATGCAATACCTCTGCCGTCTTCTCATCGGACGTGCCTTTCGG  
GAGCTGCGCCTGGATGGCAGAGAACAAAGGCGTAATCCCGATGATCCGAGGGAAACG  
CCTGTTGAGCTTTGTCTTGGAATGGCCCGACTTGCTCGACCCGATCCTCATCGTTCAC  
AGCTGCGTTTGAACGCCCGCCAGTCCCACCAAAGCCAGGCAATGACGTATAGGAGG  
ACGACATGCGCTCAGGCAAGACGATCTGTGCCGGCATTTCGCTCTGCGTTGCGGTTG  
CCGGCGACGGCGCTCGCACCCGCTCTTGCTGCTCTGCCTGCAATGGAACAGCAGATG  
GCGCATCGTTCTGTGGCAT

>CONTIG\_532\_length\_474\_cov\_0.907781

GTTTCGACTACATCAAGACCGACCAGCGTTACCTGTCGCACTGGCGCGACGGTGAGT  
GGGACCAAGGCAAGCTGACCGAAGACAACGTACTGCACATCAGTGAAGGCTCGACG  
GCCCTGCACTACGGCCAGCAATGCTTCGAGGGCCTCAAGGCCTACCGCTGCAAGGA  
CGGCTCGATCAACCTGTTCCGCCCCGACCAGAACGCCCTGCGCATGCAGCGTAGCTG  
CGCCCGCCTGCTGATGCCGGCGCCGTCGAACGAGCAGTTCATCGAAGCCTGCAAGC  
AGGTGGTCAAGGCCAACGAGCGCTTCATCCCGCCATACGGCTCCGGTGGCGCGCTG  
TACCTGCGCCCGTTTCGTGATCGGCGTGCGGCGACAACATTGGCGTGCGCACGGCTCCA

GAGTTCATCTTCTCGGTGTTCTGTATCCCGGTCTGGCCCGTACTTCAAGGGCGGCATG  
AAGCCGAACAACCTTCGTGATCT

>CONTIG\_533\_length\_474\_cov\_0.648415

GTGGTGCTGTTGCAGACCGACAGCGGCCATATCGGCTATGGCGCAGCGCCGGCCAC  
CGCACCGATCACCTGCGATACGCATGGCTCCATCATCGCCGCGATCCAACAATGCAT  
CGCCCCGAAGCTGACCGGCCAGGACGTGGCCGATCTCAACCGGCTATGCACGCTGG  
TGCAACACGCGCTGGAACATAACAGCAACGCCAAGGCTGCGGTGGAAATCGCGCTC  
TACGATCTGTGGGCGCAGGCATTGAGCACGCCGCTATAACCAGGCGCTCGGTGGCGG  
CACGCCGCGCATCACCAACGATATCACCATCAGCGTCGATGCCATCGATACGATGGT  
GGCCGATGCGCTGTCCGCGCTCGCACGCGGGTATGGGTCTGCTGAAGATCAAGGTCG  
GCAAAGACAGCGATTTCGGATGTCGAACGTATCAAGGCAATTCATGCGGCGGTCTGCT  
GGCCGCGCATCGCTGCGCCTGGAT

>CONTIG\_534\_length\_472\_cov\_1.182609

GTCCAGCGCCTGACGCTTGACGATGGCATCGCGCAAGCGCGCCTGGAAGTCCGGGA  
ACTTGGCCCAGGCATCGAGCAGCGCATACGGGATGGCGGTGTCGAAGTCGGTCTTCT  
TTGCGACGTATTCGTTCTTGTCTGAGCGCGGCCACGTTGCGCGGGGTGCGGGTCTTAC  
CGGCGCCGGTGTCTGGTGCGGCTGGCGATGCTCCCGGTGACGCCGATGCCACCTTCT  
GGCCGGACAGTTCTGTCACCGGGATGATGTTGATCTTGGACAGGAACTCGCTGGATT  
CCTGCATGCGCGTTTCCAGCTTCTGCTGCACGGTCGGATCGACGGCGAAGGAATGGA  
AGGCGGAGGTGATGCCGTTGAGCTTGGCGATCTGATCGGCGAACTGATTGAACTGC  
GGACGGGTGGTGTGTTTGCATGGTGACTCCGAAGATTGGGCGCTGGCGGGCGTGTGTGT  
GGTGTGGGATCAGCAGCC

>CONTIG\_535\_length\_472\_cov\_0.721739

GTCTCGGCGATGAAGCACGTCTGGTCTCGGCGATCAGCTCGAGCGCCTCGAGAAGCT  
CCGCCTCCAGCTGCGCCAGGAGGGCCTGTTCGATCCCTCGCGCAAGAAGCGGCTTCC  
GTTCTCCCGCATGTGATCGGTCTGATCACGGGCGAGCGATCCGATGCCGAGAAAG  
ATGTGCATCGCAATGCCGAGCTGCGCTGGCCGCAGGTGCGATTCCGCACCGAGTAT  
GCCGCCGTGCAGGGCGATCGGTGCGTGCCCGACACCCTGGCCGCGCTCGCCCGACT  
CGACGCCGACCCCGACGTCGACGTCATCATCATCGCGCGCGGGCGGGAGACCCGC  
AGACGCTCCTCGGATTACGCGACGAGCGCCTCGTCCGCGCCGTGGCAGCGGCATCC  
ACCCCGGTGGTCAGCGCGATCGGACACGAGAACGACCATCCTCTCCTCGATGACGT  
CGCGGATCTCCGCGCCTCGACTC

>CONTIG\_536\_length\_471\_cov\_0.816860

GGTCAAGGCACGCGCCAGGAGCTATGGCATCGAGCGTGACGACGGCCTGTTCTTCC  
AGTTTCCCGGGCGTGGTACGGCCGCCTTCAACATGACCCATATCGAAACGCCACTGG

ATCCGGTCGCCGCCTCCACGTGGCCATCGAGGGGCGCCAGCAGGTGGACAAGGTG  
ATTGCCTTCCTCAAAGCCGAGTACCCCGAGGTCTACGGCGAGGCCCGGGTTCGTGCC  
TATGCCCTGCCGGGCATCCGCCAGACCCGCTGGATCGTCGGCCAGCATCATCTGACT  
ACCGATGAGGTGCGGGCCGCCACCCGCTTCCCTGACGCGGTTGCGCTGACGTCCTGG  
CCAGTGGAGCTGCATGGTGACGCGAAAGGCTACCAGTGGGAGCCCTTCGGCGATGA  
TCATGTGCACAGCGTGCCACTGCGCAGCCTGCTGCCGGAAGACAGCGAAAACCTGG  
TGGTGGCCGGGCGCTGCGT

>CONTIG\_537\_length\_471\_cov\_0.691860

CGACCACATGATCGACCATCTTCGCCGTACGCTCCTTGGCACGAATCGTCTTCAACA  
GGATATCCAGTGCGGCGTCGGCCATGGCGGCGATGGGCTGCTGCACGGTGGTGAGT  
TCGGGCCACACTGCGGTGGCGGCAGAGGTATCGTCGAAACCGACCACCGACAGATC  
GCGCGGCACATCCAGACCGCGCCGGTGCGCAACCGAGATTGCAGCGGCGGCCATAT  
CGTCGTTGCTGCAGAAAATGGCGGTGGGCGGTTGCGCTTGTGCGAGCAAGCTGCGT  
GCGGCGAGCAGGCCGGAGCGATAGGTGAATAATCCTTCGGCGATCAACTCCTCGGC  
CACCGTCAAACCTGCGGCCTGCAAGCTGTCGAGATAGCCATTGGCGCGTAACGCGC  
TCGGGGTGTGCTTGGGGTCGCCCTTGATCAGGGCGATGCGGCGATGGCCCAGTTCGA  
TCAGATGATCGACGATGGCGT

>CONTIG\_538\_length\_470\_cov\_0.871720

TAGATGAACTCCACGGTGCCGGCGCTGCGGTAGCTCACCGACTCGCCGAGCTGGAC  
GGCCGCCGCGTGCAAGCGTTTCGCGGGTGGCCTGGGGCAGGTTTCGGCGCCGGAGTTT  
CCTCGACCACCTTCTGGTTGCGCCGTTGCAGCGAGCAGTCGCGCTCGCCGAGGGCCG  
CCACGCGGCCCTGGCCGTCGCCGAAGATCTGCACTTCGACGTGCCGCGCCTGGTCGA  
CGAAACGCTCGATGAAAACGCCTGCGTCACTGAAGAACTGCTCGCCCATGCGTTTCA  
CGCCGTATAGGCGCTGGCCAGGGCCACGGCATCGGCGCAGCGGGTCAGGCCGATA  
CCGCCGCCGCGCGGCGGTGGTCTTGAGCATGATCGGGTAGCCGATGCCTTCGGCGGC  
GGCCAGGGCTTCGTCGAGGCTGTGCAGCAGGCCGGTGCCGGGCGCCATTGGTACCT  
GGGCCTCGGCGGCCAGTTC

>CONTIG\_539\_length\_470\_cov\_0.862974

GCTGCGGGACAACCCGCACGGCAACCGTCGTCTGCCTGCCCAGGGCGACCACGGCA  
TCGACGTCTTGGTCCGCAACGACGACGGTAGTTGGAGCGTCTGGCAGGTCAAGCGG  
TACACGAACCCCCTCGATAGCAGCCAGAGACGATCCATCACCGAGTCCTGGAACCG  
GCTCCAGGAGTTCGTCCGGGAGCGCGGGATCACGCTCCGCGACTGGTGGGTCGTCC  
GGCCCCGCGACCCACCGACGGCGACGAGCGGTGGTTGGCGGGATTGACGGCCGGT  
AGCGGCGTGCCAACGCACTGGCTGGGTCTTGCGAACCTGGATGCCTGGACCACGCG  
ATACCCGGAAGTGGTCGACTACTACCTCAACGGAGGACGAGACCAGGCCTTCGAGT  
ACGCGATGCGAGCGCTGCAGGCAGCTCGCCTCCTCGGAGGTCACTCCGACAAGCCC  
CTCGACCCAGACGGCGTCGCGC

>CONTIG\_540\_length\_467\_cov\_9.776471

GGCGTGTTGAGCGAGGTTTCCGAGTGAAAGCCCGGCGTTTTGCCAAAGACAAAGGC  
GACATCATCTTGATGATCACTTTGCGGAGTTCATCCGCGCGTTCGATCCCTGACTCT  
TTGACGGCATGCAATACCTCGGCCGTCTTCTCTTCGGAGGTGCCCCCTCGGGAGCTGC  
GCCTGGATTGCAGAGAACAACGCGTAATCCCGATGATCAGAGGGAAATGCCTGCTG  
AGCGACATCTTGGAAGGGCCTCGCTTGCTCGACACGATCCTCATCGTTCACAGCTGC  
GTTTGAACGCCCCGCCAGTCCCATCAAAACCAAGCGATGACGCATAGGAGGAGGACG  
TGCGCTCAGGCAAGACGATCTGTGCCGGCATTTCGCTCTGCGTTGCGGTTGCCGGCG  
ACGGCGCTCGCACCGCCTCTTGCTGCTCTGCCTGCAATGGAACAGCAGATGGCGCAT  
CGTTCTGTGGCAT

>CONTIG\_541\_length\_467\_cov\_9.358824

GGTCTTGAACGACCATATCTGTAAATTCGACTTTGCCGATGCGAATGCTTCGGATGG  
ATAACTGACCTTTGGGCTGTTGCAAATATTGATGAAGTTGGGAGTGTTTAAAGTGCA  
TCTACGATCCAATGATGAGGAGGTAGACGTTTGATAAGGGGAGGGGATTTTCTGTCA  
ATGATAAAATAGGACAGAAATTTTGCCTCAATGATTGTCTAAGGTGGTCTCACCAAT  
TGCCGTTTAAATAGCTATATTTTCAGTTTAACTTTTATGGGGGATTTTATCGGCAGGC  
TATATATGCCAATGATTTAAGCTGTATAAAAGGGCTTGAAACCATCAATGCGCTTGT  
AGTGTTTAAAAGTAACAAAAGGGCGGAAAGTGAGAGATATCTCACGCAAATAAAAT  
GAACTCCAGATAAATGAGGTGGCTTTGCCTAATCCAATCAATCTTAAGAAGACAGTT  
AGGCAATCCCA

>CONTIG\_542\_length\_467\_cov\_0.808824

CAGAAGCGCGAAAACCTGCTGCTGTTCTTGGGCAAGGACATCGCGCCGCAGCAAGT  
GGTCACGCGCGCCGGCAGCACACTGGATTTCGGGCGCAATGCTGCTGCAGTTGCTGG  
AACCGGGCATGCGCACGCTGGGCTTCGGCCGTTTCGCTGCTGGCCAGCGATGCGCCA  
CCCAGCGCCAGCGTGCGGCCAGTCGCGACAGCGGCAAGGACTACCCGCGCTATCT  
CGCCTACGCACGCACGCTATGGACCGGGCGCAGCACACGCATGCTGCGCATCAACG  
GCAATGGCGATGTGGTGGTGGGCGTGCAGCAGGTACGCCCCGCCGGTGCTGCTGGCC  
TCCTCCTCTTCCCCCAATCTTAAACCTTTTTATCTTTAAAATACCTCTCTCCATTTCTA  
TCTCACCCATACCTAATTCACCTTTTCTTATTTGGACCGCTTCACGTCATTCGAAGAC  
GGCTCGGCCGACTT

>CONTIG\_543\_length\_465\_cov\_0.946746

TCTCTAGCCTATGTGGTGAATCTGAACCTCGATACTTAGGGTTGGATCGGGACGCAG  
GCATAATAAACGCCGGTCCTCACTAGTGAGGACCGGCGTTTTGAAGGAGGATCAGG  
CCTCAGACTTCTCCTCGGCCTTCTCGTCAGCCTCGGCGGCCTCCTGCTCGTCGGCCAC  
GGGAGCCTGTGCAGCGGCGTCCTCGGCGGGGGCGTTGTGCTCAACGGCAGCGTCTC  
CGGCTTCGGGCTCGGCGTCCTTGGCCTCGGTAGCGGTGTTGATCTGCGCCTTGGCGT

CAGCAGCGCTGGCCGGAGTCTTCGGAGCGACCTTGTCGCTGATGACCTCGATAACG  
GCCATGGGGGCGTTGTACCCTTGCGGTTGCCAATGCGAGTGACGCGAGTGTAACCG  
CCGTCACGACCCTCCATGCGGGGGCCGATCTCGGTGAAAAGGATGTGCACGATGCC  
GCGGTCGGTGAT

>CONTIG\_544\_length\_465\_cov\_0.940828

CTTCATGGGGTCGTGCACGAACAGTCGCATCGAGGACCTGCGCGCATTCGCCTCGAT  
CGTCAAGGGCAAGAAGAAGGCCGACGGCGTCCGGGTGATGGTCGTTCCGGGGTCCG  
CACGCGTGCGCCTGGAAGCCGAGGCCGAGGGCCTCGATCAGGTCATCAAGGACTTC  
GGCGCCGAGTGGCGTTTCGCCGGATGCTCGATGTGCCTCGGCATGAACCCCGACCA  
GCTCGCCCCGGGGGAGCGCTGCGCATCGACGTCGAACCGCAACTTCGAGGGACGAC  
AGGGCAAGGGCGGACGGACGCACCTCGTCTCGCCGCTCGTCGCGGCGGCGACCGCC  
ATCCGCGGCACGCTCTCCAGCCCAGCGACCTGTGGAACGAAGAGCCCGTCAACGC  
GGGCGCGACCACGGCTGGAGCCATCTGATGGAGAAGTTCACCACCCACACCGGCAT  
CGCGGCGCCGCTGAAG

>CONTIG\_545\_length\_465\_cov\_0.878698

TGTCTATGGTGGCGTTTATTGCGAGTAGGCTGCGCTATCATTCAAGTGCCATCGTGA  
CCGTGATCTTGATTATCGGGTTGGTCTCAACAGTGTTAATTGGGTTCCTGAGGTGG  
AGGGTGTGGGTGCTTTTCCTGCCGTGCCTCGAACTGGGACGCAGACGTGTTTGAAGG  
ATCCCACGGTGTGTACCTGGGATGCGCACGACCTCCAACCTGCTGGGGCCCATAGTGC  
AGAAGGCAGATGCTGCGTGGAGGGCTAACGGGGTTCACGTTCCAAGGGCATAACCGG  
CAGGGCATTGGGCAATCGACTCAAACAACCGTTTGGTGGTCGGCGTCGGCAGAGGA  
TGTGTCTGAATCGGCATTACCCGCACTATCGGCAGTCGCGGAGGGCCTGGCTGTTGC  
TCCATGTCAAGTTCGTCAAGACGAAGTGGAGATCTGGGTGCAAAATGTTTCAGGATC  
GTGTTGTCGCTT

>CONTIG\_546\_length\_464\_cov\_2.979228

GCCTGGCCAAGCGATGGAAGAAGCGCGCAACGCGCGGCTTAGAGATCCGGCTTTCA  
CAGAGCATCTTCGAGAGGCTTGGAACAAACAATTCGATTGGCACCGTGATCTGCCG  
GAACACGTGCAAGAAGTCCCCAGATCCGATCCTGCTCTCCAAGCCAAATTGCTCGCT  
GAGCACGCCGAGCTGCACGTGACGCGTGAACAGCCGGCTGGAAGGCATCGC  
CACTATTGATGAACTCGTGCGGCCAGGGGCTCCGCCTGCACGCGTGCCTGTGCCGGA  
GCCGAGATCCCAGGCCTGCGTCGCGCCGGGATGACAGCAGGGGCTTGCGGGCTTGG  
GCGTTGCCGCGACCGCCTACGATGCGTCGCAAACCGGAGAGCGTGTTGGCACGCTG  
TTGGCACAAGACAACCTCACTGCTGCACGCTCAGAAGCGTTGCACTTTTCTGCCCCA  
GGCGCGGGCGGCT

>CONTIG\_547\_length\_464\_cov\_0.623145

GATTTATATATATAATATATATATATGTTTTATTTATTTATTTATTTATTTTTTGAGAG  
ATGGAGTCTCACTATGTCTGTCGCCCAGGCTGGAATGCAGTGGTGCAATCTTGGTTC  
ACTGCAACCTCCGCCTCCTAGGTTCAAGTGATTCTCCTGCCTCAGCCTCCTGAGTAG  
CTGGGATTACAGGCATGCGCCACTACGCCTGGCTAATTTTGTATTTTTAGTAGAGAT  
GGGGTTTCTCCATGTTAGTCAGGCTGGTCTCGAACTCCTGACCTCAGGTGATCTGCC  
CGCCTCAGCCTCCCAAAGTGCTGGAATTACAAGCGTAAGCCACCATGCCCAGCCAA  
TATTATCCATCTTTAAAAACCAAAACACCTCTCCCTCCAGCTACCATCTCTTTTTCAT  
TCAAAGTGAAATTTTTCAAAAAGTTGTTTACATTTGTCCCTGTATCTTAATCTCTCCA  
CAACC

>CONTIG\_548\_length\_462\_cov\_65.814925

CAGCTGCTGCTTGTCGGCCTGTCCCTCGATGGCCGTGCGAGCCGGCTCAGCACCTGC  
AGCGCCTGCGGGCGGGATGTCCATGATCTCTTCGGCGATCGCCATGCCGCGCAACAC  
GTCGGTGAAGACGTCGCGCAACGCGAATGCACGCGCGCGCATCTGGCGCATGCGCT  
TCGGGTACTGCGTCCAAGGGCCTTGCTTGCCGATCAGGCCAGCCTTCTTGCGTCCT  
CCATGCTGAAGGTCACCAGCGCTTCCTTCTCGCCTTTCCGCTTAACCTTGCAGTGGGC  
AGTCTCGTGGTCGTCCCACTCCTCCACGAACTCGCACACCGGAGAGTTTCGAACCAG  
CGCGAGCACCGCATCGCCCCACAGCGCCGCGCGACCGTTGATGACAGCGATGTTCT  
GCAGCGCCTGGAGCGGCTTCAATCCCAGCTCCGCGCCCCACTGCATTGCGATCAGAC  
AATTCGC

>CONTIG\_549\_length\_462\_cov\_28.838806

CGCTGAACATCCATTCATCCGTCGCCGATAACGCCAGCGCCCGGATGCACCAGGCA  
GCCAATACGTGGGGTGGGCCGCCGCGCTAAACGGGCTTCGTGTCTTCGTCTAACTCT  
TGGCGATCCAGCCATGCCATCTTGATGCATGGACCGTCATCAGATGAGAGCGGTA  
GGCATTTCCGCAACGCCTCTTCTCGGCATTTGACCGCCAAGGAAGCGCCAAGGCTTG  
ATCGATGGTCAGGGCCAAGATCGTTGCGCCTTGCTGGAAAGCCTCTTCGATCACACT  
CATGTGCGAGCCCCGTGATGCCCGCGTGTGAGATCACGCTCTTGATCTTGCCAGCCGA  
CGCGCGGATCACAATGAAGGGAATGCCCTTCCCCGTTTCGACCGAAATTGCCCGAGA  
TCGGCTCTTGATCTGCTCTCGGGCTTTGGTGACTTGGGCATACCACGTCAAGAGTT  
CTACCTTAG

>CONTIG\_550\_length\_462\_cov\_1.050746

TTGATGTTCTCGGCCTCGGGGCCGATCTCTCTTCTTATGCCATCGGCTATGTCATTCA  
ATCCGGGAATCGTGTTTTTCGGATCCCAGTGCTTTTCCGCACGGATCGCCAGGTCAA  
TTCGCTTGGCCACGAATTCTTCCGGATCCCCATGTTGCGCCGGCGCGATCCCCTTGG  
CCGAGGTCTTGATCTCGAAGAACTCCAGATCACCGTCGGGGTTGCGGCCGACCAGG  
TCGATGCCGTGGCCGGAGCGGTTTTTGATCGCGACGATGTGCTATAGCCTTGCTTT  
ACCAGTTCGTGGGTCTGGATGGCTTCGCCGATGTGCGCCGAGCTGGCGCGTGGTGAGC  
CGGGTCAGGTCCACGCCCTGCGTGCTGTGGTCTAGCGCAGTCGGGAAGTCGATCCTG

CCATCGAAGACATCCGGGTTGCGCTTGAGGATGGCGGTGAGTTCGCGCGGTGCCAG  
TTCGCCG

>CONTIG\_551\_length\_462\_cov\_1.026866

TCATACAACTCGTTCCTGACTTGGCAACTAGCGCGTGCAGGGACTAGTGCAGTACCC  
ACTAAGCGAAAGCAACAAGGAGAAGACTGGAAGCAGTCCCGGTTGGCACCAGACA  
TCCCATTACATATGACAACACGACGTGCTGCAAAGACGTCGTCTAATCATACCAGCC  
CAGCTGCACCATCAAGTGCAGCGTCTGGCAGTCGGCGTAGTTTCATTGAACGACGTTG  
CGCAACCATCAGACTTTGACGATGAACCAGCCAAGCGCAGCCGAATGTCGACCGAT  
TCTGGTTCGCCAAAGGGTTCATTTGGCAACAGCACCCCTATGAATGGTACCCAACT  
CCGGAGCTGGACGAGGCTGCATCCAAAGTCACTCCAGAGGTATCAAAAACCGCAGG  
AAAGAAAAGGCGCGCATCAGACGAATCCACGCAATCCGGCAAACGCGACCAAAT  
GGTGTTCTGACC

>CONTIG\_552\_length\_461\_cov\_1.038922

GTACAGTTTAGGAGGGAGGAACTGAGATCTCATTGTTCAAGGAATAGATATTAGTT  
TAATCAAATCATTGTAATTCCAGTTGCTGTATATTTTCAATAATCTAAACTTAAGCCA  
ATCAGTGCATTTCCCTAGGTGACCTTCATTAGTAAATGGTGTCCACATGGCCTAACA  
ACCCAATCATAGTTAACTGAGGTACTTTTAGTTTCATAATTGGTAATAAGGTTTTGCTG  
TGCTCCTATCCAGACTCTCATCTTGAATGGTAATCTCCATCATCCCCACGTGTCAAGG  
GAGAGACCAGGTGGAGGTAATTGAATCATGGGGGCAGTTTCTCCCATGCTATTCTCG  
TGATAGCGAGGGAGTTCTCACGAGACCTGATGGTTTTATAAATGTTTGGTAGTTCCT  
CCTGCGTTCGTTCTCCTTCCGGTCACCTTGTGAGGAAGGTTGTTTGTTCCTTTATC

>CONTIG\_553\_length\_460\_cov\_0.783784

CGCCTGGTGAGCAGTTGCAAGGCGGCGTTGGCCGAGCTGGGCCATTGCGCACCGGC  
GCTTGCCAGCACCGATCCGCACGCGGCGCAAACCCCGGCGCTGCAGTCGCCACGC  
TGCGCCAGCTCGCCAACGGCAGCCACGCACCGAGCGTGCAGACCTGGGCGGCAAG  
CGCGTACTGGAGCTGCAACGGCTTGCGCATATCGCCGGGCAACTGGCGCAGATGGA  
CTACGACTTCCTCTATAGCCCCGCCAGCAGTTGCTCTCGATTGGGTACAACGTCGA  
CGACCATCGTCTGGATAGCGGCCGTTACGATCTGCTCGCTTCCGAGGCACGCTTAGG  
CATCTTCGTGGCGATCGCCCAGGGCAAGCTGCCGCAGGAGAGCTGGTTCGCCCTCG  
GGCGCACGCTCACCGATACCGGCGCCGAGCCGACGCTGCTGTCGTGGAGCGGCTCG  
ATGTTTCGGGT

>CONTIG\_554\_length\_456\_cov\_1.051672

TTACCGGCCAATCGGCTTCGGATGCCGCTCGAATGCCGGCCTGGCGACATTATCCTG  
GCCGACTCCATTCGCGCCCTGGACCACCGCAGCGCTGGCGCTCCCGCGCAGCCGGTC  
ATCGCACCGAACCTTGCCGGTCATCAGCGGCCGACTGCCAAGACGCTGTCCGCATCG

ATCGCCGAAAGCTGTATTGCGCGAAGTCAACGCCGCGTTCCGGAACGTGCGGGTCGA  
TCCCGCGTAAGCGGAGGATTACACTGCGCAGCTACGTGAGCGCCTCTTCCCTCCATG  
TGTGTTCAGTACCTGCCCCGGATGCCGACAGCGCCGATCGCATTGCGCACGCGCTGC  
TCAACGAGCGCCTGGCCGCTGCGTCACCCAGGTGCCCGGCGTGACGTCGCTGTACC  
GCTGGAATGGGGCGATCGAGCGCAGTCAGGAAGTGCAGCTGTTGATCAAGACCTGG  
GA

>CONTIG\_555\_length\_455\_cov\_1.926829

GTTCCGAGCGAGGACGTTCTGTTCGGAGCACTTGGGCCGTAAAGCTCTGGCAATTCAG  
AGCCTGCGCGAGAAGCTGGTTCAAGAACTGGAAAACAATGACCAGCTGGAGCTGTT  
CGAAGAGCTGGAGATGCCTCTGGCTCTGATTTTGGGCGAAATGGAGAGCACCGGTG  
TCAAGGTGGATGTTGATCGTCTGAAGCGTATGGGCGAAGAACTGGGCGCCAAGTTG  
AAAGAGTATGAAGAGAAGATCCACGAGATCGCCGGTGAACCGTTCAATATCAATAG  
CCCGAAACAACTGGGTGTGATCCTGTTCGAAAAGATTGGCCTGCCGGTTGTCAAAAA  
GACCAAACTGGTTACAGCACGAGCGCGGACGTGCTGGAGAAATTGGCGGACAAAC  
ACGATATTGTGGATTACATCCTGCAATACCGTCAGATCGGCAAACTGCAATCCACCT  
ATAT

>CONTIG\_556\_length\_455\_cov\_0.777439

CTTACCAGCGCCGACTGCCGCAAATCGCGGATGCCGATCCTCTGCGCGGCCTCTGC  
GATCTGCATTGCATTACCGCCTTCCAGCACGATCGCGCCAATCTCGTCGGTTCATCGG  
CATCACCTGGTAGATAACCGGTACGGCCCTTGTAGCCTTCTGTGCACTCATCGCAACC  
AACCGCTTCGTATAGCTCGATGCCGGAAGCGACCTGCTCTGGCGTGAAGCCTTCGGC  
CAACAGCGCGTGCTCCGGCAGCGGTGCCTTGCCTTGCAGTTGTTGCACAAACGCCG  
CGCCAGACGCTGCGCAATGACCAAGGTCACCGACGAAGTGATGTTGTACGGTGCAA  
TGCCCATGTTTCATCAAACGCGCGATGGTCTGCGGCGCATCGTTGGTATGCAGCGTCG  
ACAACACCATGTGACCGGTCTGCGCCGCCTTGATTGCGATCTCGGCCGTCTCCAGGT

>CONTIG\_557\_length\_454\_cov\_1.058104

ATCTACGCTTCGGGAGGTAAACCCAATGACGTTTCTGGTGCCCTGCTGTGCGTTGGC  
CTGACCCTGTTTATCTGTGGCATCGTCATCCAGACCGCCGGATCTCGGGTCGTCCAT  
AAGGTTCTGCCACCGACGGTGACCGGCGCCGTCGTTATGCTCATCGGGTTCAACCTC  
GCGCCGGTCGTCGCCAAAGCCTACTGGCCCACCGACAGTGGAACCGCACTCATCGTC  
ATGCTGCTCGTCATTGCACTGTCGGTGGGACCACGCGGCTTCGTGTCCCGGATCGCT  
ATCTTCTTGGCCCTGGTTATCGGCTATGCGCTGTCGTGGGTCGAAGATCTCGTTTTCG  
GCCCCGCTGCGCCACTCCGATGGCGGCACCGCCCCACGGGTAGATTGGTCGGCGGTA  
CATGGCTCCGCGTGGATCGGCTTGCCCTCCGGTGACGAGCTTGGACAGTTGGCGAT

>CONTIG\_558\_length\_454\_cov\_0.951070

GCCGTCGGCTCATCTGCCAGCAAGACTGCGGGCCGCGACGCCACAGCCCGGACGAC  
GGCCACCCGCTGCTGCTGCCACCGGACAACGTGCTGGCCTGCTGATTGGCCAGGTC  
AGCCATGCCGCAAGAGGCCAGTAACTGATACGCGATCTCGGCTTCGGCGCACAGAG  
CGGCGTTCTCCAGACAGTGAAGTACGGGGTGAGGAATGGGTACTGGAAGGCGTAG  
GCAACCAGCCCCTCACGGCGAGCCTGCTCAGGATCACGGTCGCCATGACCATGAGC  
AATGGTGATGTGCCCCGCTCGTCACTGGAAGCAGGCCACCGATCATGGCCATCATGGT  
CGACTTACCCTGACCGGATGCTCCCTTGATGAGACATGCCTGACCTGCGTCAACAGT  
CGCATCGGCGCAATGAATCGTGCACCCCCACGCGCGGAATCGCCGAGGGGAATG  
TCT

>CONTIG\_559\_length\_453\_cov\_0.914110

GTGCGGGATGCAGTGCCTGAAGGCGCCGCCTTGTTTGGCGACGAGCAGATGGAGGC  
GCTGGGGCACAGCCTGGCGCAGGCGCATGTGCTCTACACCGGGCCAACCCGCGAGC  
TGCTGTTGTCGCAACTCAAGTTCAACGAACGCGCACTCGGCACGGCCGCGAGCGCGA  
TTGACCGAAATGTCGGCCGATGGCTTGCGCCTGCATCCGGCCGGCGAGTGGTTGCTG  
GACAACTATTATCTGGTCGAAGAACAGATGCGCCTGGCGCGTCAGCATCTTCCACCC  
GGTTACAGCCGGCAATTGCCGCGTCTGCGCACGCTCACCTCGGTTGGCCTGCCGCGC  
GTCTACGAGCTGGGCCTGGAAGTGGTGGCGCATGGCGACGGGCGCGTGGATACGAT  
CACGCTGAGCCGTTTCCTTGACGCCTATCAACAGGTGGCGCCACTCAAACCTCGGCGA  
G

>CONTIG\_560\_length\_453\_cov\_0.834356

GGTACAAGGAGGAACTGGTACCATTCTTCTGAACTATTCCAATCAATAGAAAAA  
GAGGGAATCCTCCCTAACTCATTTTATGAGGCCAGCATATTCTGATACCAAAGCCG  
GGCAGAGACACAACCAAAAAAGAGAATTTTAGACCAATATCCTTGATGAACATTGA  
TGCAAAAATCCTCAATAAAATACTGGCAAACCGAATCCAGCAGCACATCAAAAAGC  
TTATCCACCATGATCAAGTGGGCTTCATCCCTGGGATGCAAGGCTGGTTCAATATAC  
GCAATCAATAAATGTAATCCAGCATATAAACAGAGCCAAAGACAAAAACCATG  
ATTAGCTCAATGGATGCAGAAAAGGCCTTCGACAAAATTCAACAGTCCTTCATACTA  
AAAACCTCGCAATAAACTAGATATTGGTGGGAAGTATCTGTATAAAATAAAAAGAGCT  
AC

>CONTIG\_561\_length\_452\_cov\_0.704615

CAGGAAGCGGTTCGGCCGATTCTCGCAGGCGGTGTCAAGGAGATGTCGAACTGGGT  
CAACAAGCTGTACGGCCAGGCATTCGCCGCAGTGTATGTCCAGCCCGGCGCCAAAG  
TCGCCGTCCACCTCGACAAGCCGCTCGCCATCGACTTCGACCCCGAAGGTCGCAAGG  
TTGATCACCGCGCAGGAGAAAACCATGCTCTCGAACTTGACTAAGGGCCTTGCGTCG  
GCCCTCCTCCTCGCGCTGCTGGGCGGCTGCGCCACCAGCAAGGAGGATCTGCTGACC  
CACGGCGACCGCTCGATGATGGATATCTGGCAGCAGGAAACCGGCGACGGCGCGGT  
GGGTGGTGCCGGCCAGGTGGCTCACCGCCTGCTGCTCGACGCGCGCCAGAGCCTGC

GTCGGCCGCTGACCGACGCCGACGTGCAGGCCGCACCCGCCGAGCAGATGCGCTAC  
A

>CONTIG\_562\_length\_451\_cov\_0.774691

CCTTGTATGAGCTCATGCTCGAGGTTCTCGACATCCGGATGCGTCGTGAGGAGCCCC  
AACAAAGTCGTTGTGACTTGCCACATCCTGGGGGAGTACTTGGCGCAGTTGGCCTGGC  
AGTCAGTCTTAGGCGATGGTGGGGATCCGCTCACTTTGCCTGGCAAGGTTGGCCAGA  
AATGGGGCGGTGATGGTCAAGGCTGTGCCACACCTCCGCCATGAATGCCACCGCG  
CGACGCAGCATGCACGCTGCCAGGGAGACGAGGAGGGGTATACCTCGTACCTCGA  
CAAGTTCCACTCCCGGTTGGGGGAGGCCCTCGTAGTGTGCGCGATGAATCATGCCAC  
TATTGATGTTGGTGAGCGTCCCGACGTTGGTATCACTTGCCCTGACCCGTGTGGTG  
GGTCTTAACCGGAACCTGGGAGGAACGCAGAGCCCTTGACGCTCGGGTGCGCCT

>CONTIG\_563\_length\_450\_cov\_34.452012

GCTTGGCAAGTCGTCAAGCGCGGAGAGCAAGATGAAATACACCATCGAGATCAATG  
CGACTGTCCAAGTCGCCACTACATGACAGTTGAAGCAAGCTCGCCGCAGGAGGCG  
CTTGCTCAGTGCGATGTCGACACGATTGCGAACAGTGACTTCGATTTGAAGAATGG  
TTAGCGCACCCGAGATCCATCGCATCGAAGATGAAACCGGCACGCTCATTGCGTGT  
GACTACGAGGACCATGTTCCAGACATCGACGATCTGTAAGTCCCTTCTCGGCTTGTC  
CAATCGACTGATGCTGTCACGCTGCGATCTTGACGAAAGGCGTTTCGGCCTTAAGTT  
GAATGGAAAGGAGACGAAATGGACCAATCAATTAGAAGAAATATTAGACAAGCAG  
TGAAGCAGGGAAGCGAGACATATGTGCAGTCGCTTTGTCAGGCTCAGGGTGACAT

>CONTIG\_564\_length\_450\_cov\_0.811146

TCGTTAGGCTTCGCCTGCGAAGATCCCGACGCCACCCAAAACCTATCCACGGCTGCTG  
GCCAACTGGCGCACCAACCTGCTGGGCTCCAGTGCCAAAGGCACCGAGTTCTTCATG  
AAGCACATGCTTGGCTGCGAGAATGACGTCAACGCCACCGAGCTACCTGAAGGCAA  
GCGTCCTACCGACATCCGTTGGCGCGACGACACCCCGCCCGGCAAACTCGACCTCAT  
GTGGACCGCGGATTTCCGCAACACGTCCACCACACTGCATTCGGACGTCGTCCTGCC  
AGCCGCGACGTGGTATGAAAAACACGACTTGTCGAGCACCGACATGCATCCCTACG  
TTCATTCCCTTCAACCCAGCTGTGGATCCACCATGGGAGGCACGTACCGACTTTGAGG  
TGTTCCGGACCTTGGCATATTCCGTCTCCAGATGGCCGTAAAACACCTGGGG

>CONTIG\_565\_length\_449\_cov\_0.260870

GGAGGAGGGGGGAGGGAAGGGGAAGGAAGAAGGGGGGAGAGGAAGAAAGAGAGG  
GGGAAGGAGGGAAGGGAAAGGAAAAAGAGGGAAGAAAGAGAGAAGAGGAGGAGA  
GAGAGGAAAAGAAGGGAAGAGGGGGAAAAGAGGGGAGGAGGAGGGAGAGGAGAG  
AAGAAGAAGAGAGGAGGGAGAAGGAGGAGAAGAGAAGGGAGAAGAGGAAAAGGG  
GAAAAAAGGGGGAAGAGGGGAAGAGGGGAGGGAGGAGAAAGAGGGGAAGAGAAA

AGAGAGAAGGGAGGGGAGAAAAGAGAGGGGAGAGGAAGAAAAGAAGGAGAGAAG  
GGAAAAGGAGGAAAGAAGGGAGGGGGAAAGAGAGGAGGGAGGGAGAAGAAGGAA  
GGAGGGAGGGGGGAAGAGAGAAAAAAGGAAGGAGAAGGGAAGCGTAGCAACGAA  
AAAAAGGGAGGAGGGGG

>CONTIG\_566\_length\_448\_cov\_1.028037

CCCTCGTATCGACCACCGCGGTGATCTCGTCGTCCAGACTGAGGAACTCCTTCTCGC  
CCGGTCCGACGCCACCAGCCGCGTCACAGTGCTCGACGACGATGACAAGTCCGGCG  
TCCTCGAAGAGATCAGAAAGCTCGGCCAGCGAGGAGGCGAGTGCCTTCGCGTCGGC  
CTTGCGGCTGGGGGCGGAATGGACTTCGACCCATCTGACGACCGGGTGTCCGACCA  
TCTCGTGCAAGGCTCGCACATCGTCAATGAGGTTGGTGAACCACTCGAGTGCTCGTT  
GACGCCCTGGCCCGTCAGGAGAGGCCAGACCAAAGTCCGGATTGCCGGCCAGCTGA  
CCCATGGTTCCCGGAATGGCCGTCACGACGCACTGGGCGAACCGATCGCGCAGTTG  
ATCGGCGAGCCATCGGGGATCGGCGTCGAGACCGTCCCGGTACGGGATCTCGAT

>CONTIG\_567\_length\_447\_cov\_0.725000

CGCTGTGCTTCGCCGAAGCGCTGCACGTATGCGGCGCGCATCGCGGCGCCATCGCCG  
AGCAATTCTTCGCCGTTTCCGGGTTCGCGGAAGCGGTGCCCGCCGCTGAAAGTGAA  
ATCGCGTTTCGTGCGCAGGTCAGCACTTGCAGCTGGATCACTTCGCGGCGTGCGGGCGG  
GAGTTTTTCCAGCGCGCCGACCAATTCTTCGTGCAAGCCATCGCCGATCGACAGCAC  
CAGCGCATGTGCGGCGATGCGTTCCCACAGCGGGCGTAGCGCATCCATGCCGGGCC  
AGCGCCCGCCGGCGCGCAGACGCTGCAAGGCCAGCCACAGCCGGTCGCGTTGGCGT  
GGACCGCCGCTGCCGGCACCGCCACCAGGCCATCGCCATGCACGGCGAACCAACC  
GACCTGATCGCCCTGGCGCAGCGCCACTTCGGCAGCGCATGCGGGCCAACGTC

>CONTIG\_568\_length\_446\_cov\_0.821317

AAGAGAAAGGACAGATTTTTTTTAAAACTTGAGAATGTTTATAACTAAATTATTTTA  
GTGGAAGTTGAAGACGCTAAAATACAAATGTTTTTGTCTATATGTCATATATAAT  
AATCTTGTGAACATGTATAGTTTCATTTGCCATTTTTGTTTTTATTTAACAAAGTTTAT  
GAAAATGAATGGAATGACAGTGAAAAGATGGCAGTATTTTTTTTGAATTGTTATTGT  
TTGAAGGTGCTTTTTTTTGTGTTTGGTTTTGTGTTGTTTATACAATAATGATAGCATGT  
TTGTTTGTGATAATTGATTTTTTTTATAGATGAAACAGTCCATGGAAGAATTCGAA  
GCCTTGCTTCTCGATATGGAGATCTTTACCAGGCATCTTTTGATGCTGACTCAGCAAC  
TTTGAGGAATGTTGAACTGTATCCCAAGCTTGCCCTAGTAC

>CONTIG\_569\_length\_446\_cov\_0.702194

GCTCTAGGTCACGCTGAGCGGGGAGAAGCCTAACGTAAGAGTCTTGCAATTCGTGTT  
CTGACTTTGCCGCCTGCTGGAATACGGCATCGAGGGCGCCGATCTTCGCTTGGGCTT  
CTTCAACTGCTGCTTCCAGACTAACAGTTTTCTCTTGGTCAAGTTTGGCTTCATTTGC

CCTTTGCGTCCGTTCCCTCCATCAATGTCAGCTGCTGTTTCTGTTGTTCCCTCAAGGCCT  
CAGTTCTTTCCGTGTTCAAGACTGGCGACTTCGAATCGCAAAATTCGCTCTGTTTCCCT  
TTTGTCGATGTTTCGCCTTTCTGGACAAGGGCCTGAGGAGCCTCGTACGCTTCGGTTTT  
CTTCTGTAGAGTTTCTTCAATCTCACAGTGTCTTCGTTGCATATCATGACGTTCTTCTT  
CAAGCAATTCCAAGCGCTGCACCTCAGTGCGGTTCTTGTAC

>CONTIG\_570\_length\_445\_cov\_0.886792

CCACCAGTGAGCTCAACGAGCGACTGCAACACGTGGCCAGCGCACTGGATGCCTCG  
CTCGCTCGCAGCGACGACCAACTGGCCTATTACGTGGCGCAGGCGCGCGAGGTGGT  
CGACCTCAGCATGCTCTCGCAAAAGCAGATCATCGAAGAACTGCGTCAGCTCGATC  
GCGGTGCGCAGCGATACCGGCGATACAGGCAATACCGATAGCAGCCAGGCCACCACC  
GCATGAGCGATGAGATCGACATCGACGGCGAATCGGGCACACCGATCTGGGCTGCC  
TTCGGCGACCTGATGTGCGGTGCTGCTGGGCGCGTTCGTGCTGATCCTGGTCGGGGTG  
ATCGGCGTGAGCTGCAGCTCTCCAGCCGCCTGGACGAAGAGGTCAGGCAACGTCA  
GGTCGAAGCGCAGCGTCGCAAGACGCTGGAACAAGCCCTGGCCGCACCGCTG

>CONTIG\_571\_length\_444\_cov\_35.198738

GCATGCCATTGCTGATGTAGTCGCGGCTAATCACCAGGTCGCCGCCCTTGTCATCCA  
CCCCACGCACGATGATGTGCACGTGCGGGTTGTCGGTGTCATGGTGGGCGACGGCC  
ATCCAGTCCAGTTTTGTCCCTAGATCCTGCTCCATCTGTTGCATCAAATCGCGGGTGT  
AGCTTTCTAGATTCAAGTTCGCGCCATCTTCCGGCGAGACGATGAATCGGAACGAAT  
GCCGGTCAGGTTCTGTCCGGTCCACGAAGTGCATGTCTGCTCGCGCGTGAGTTCGC  
CCGTGTCGGTAAACGGGCGGGGCCGGCCACCATCCTTGTCTACGCCGTGGCGTTGCG  
CATAGTCCACGTGCCGCTGCATGGCGGCTTTTGCTCCGACCCGTGGTGCTGCAACCA  
CACGGGCCTTGATGGTGACGCGCTGCTGTGCGGCTTCCGGTGTTGA

>CONTIG\_572\_length\_444\_cov\_1.091483

GCCGAGCGCCGTGCCAGCCGATTGCTGATCCTCGATGGCGCCAGCGGTGCACTCGCT  
CATCGGCAGTTTGCCGACCTGCTCGAATACCTGCGCCCCGGCGACCTGATGGTGTTT  
AACAATACCCGGGTGATTCCTGCGCGGCTGTTTCGGGCAGAAGGCTACCGGCGGCAA  
GCTGGAGATTCTGATCGAGCGGGTACTCGACGAGCACCGCGTGCTGGCGCACGTGC  
GCTCGAGCAAGTCGCCCAAGCCGGGCTCGCTGATCGACATCGAGGGTGGCGCCCAG  
GCGCAGATGCTGGCGCGTCATGATGCGTTGTTTGAAGTTCGAGGAGGCGGTTG  
TTGCCGTTGCTCGAGCGCGTCGGGCACATGCCGTTGCCTCCATATATAGACAGGCCT  
GATGAGCAAGCCGACCGCGAGCGCTACCAGACCGTTTACGCGCAGAAG

>CONTIG\_573\_length\_444\_cov\_0.782334

GCGCGTGATGGAGCAACTGCTGCGGTGAGAGCCTGGCTGCGGCGCCTTGAAGCGGC  
CCATCTGAACGGGCTCAGCGTGCGCTGGGCGTCACGTTACCCATGCGCTGGTGGG

CGCCGGGTTCGGTGAGACCGCGGGCCTGGCGGCGGTGGGCGGCGCGGTCTGCGCCA  
GCCTGATGGACCTGCCCAACCCGCCGCAGCGCGTGCTGTCGCGCGTGCTGCCGGCCG  
CCGCCGCCGCCGGGCTGGTGACGCTGCTGGTCGGGCTGACGGACGGGTCCCTGGCC  
CTGACCCTGGGCTTGATCGCCGTGGTGGGATTCTGTGCTGATGACCCTGGCCTGG  
GGGCTGCGCGCCGGGCCGCTGTCGTTCTCGCCGGTGGTGGCCCTGGTGTTCGCGATG  
GCCTGGGACCGCACCGCCGGCAGCACCTCACCCGGCATGCATGCGCTG

>CONTIG\_574\_length\_443\_cov\_0.854430

TCAGTCGGCATTTCAGGCTTCGGTGACGCCGTCGACCCCAAGTGATGTGACGGTTCGG  
GAAATATCTTGTGGGCACTCTTGAGCCTCGCCTGATTCCCCATACCCGACTTAAGCT  
CAGTATCGACGGCATGAATCCGGATCGGACCGTCGTTCTTAGAACCGATAAGGATC  
GGGATGTACTCAGCCTTCGTCGTCGAAACCTTCCCAGCTCGTACCGTGAAGGTGACC  
CGACCGACGACTCCTTCGTCGGTACCGGGCATGTTAGACGACTGCTGGGCAACGAG  
ATTCCCCAGCCCATATATGACGATCTTGCCGTTTCATCCGCGTCCATGGCTCAACGAC  
GTGGCTGTGGTGGCAGTAAACCATGTCGACGGCAGGAGATGCAGTAAGGCGCTGCG  
CTAGCCGAATCTGTTCTCGGTCGGCTCATGGTGATATTCGAGGCC

>CONTIG\_575\_length\_442\_cov\_1.073016

GATAATAACAGCAAAATTAACCAAAAAGACAGCGAAAAGTACGACAGCTAACAAG  
CTGATGTACTTCCCTACTATTTTACGGTTTTCTGCTGGAGATTTACGGTTTCTAATCG  
CAAATCGGGTTATTCTTTTTGTCCACTTCATATCTTACTCCGCTGATCGAATATTCTC  
GTTATTCAATTTTAAGTCCTTAGAATTTGCGATTTCTTTCAAGCGTTCTGCCCTCAAC  
AATTCATTTACCTCTTGTTTGGCATCATCCAACCTCTGTCTTCTTCTCCTCTATCTGCGC  
ATTGATTTTTGTGAGATCATTTTGTACTTGTAGGAGTTGAGTCTGCATAAAGATAATA  
CTCAGCGCCAAAACGAGAGCTGTAAACGCAATGGAAAGATAAAAAGCCTTCTCCAC  
ACGGGAGAATTTTTTTATACGACTCTGTAATAATTGACTG

>CONTIG\_576\_length\_442\_cov\_0.822222

CCTCCAATGCGCTTCATCACCGCCAACCTCAACGGCGTGCGTTCCGCCGCCAGCAAG  
GGTTTCTTCGACTGGCTCGCCAAGCAAAAGGCCGACGCCCTCGGCGTGACAGGAGCT  
CAAGGCCAGGCCGATGTGGTCGAGAGCCAGTTCGCCAGCTGCGGCAAGCTCACCG  
GGCATTTCCTACTACGCCGAGAAGAAGGGCTACTCGGGCGTGGGCCTGTACACCAAG  
GAGGCGCCCAGCGACGTGATCACCGGGCTCGGCATCGCCGAGTTCGACCAGGAGGG  
CCGCTGGGTCGAAAAGCGCTTTGACAAGCCCGGCCGCAAGCTCAGCCTGATCAGCG  
TCTACTTCCCGAGCGGCACCAGCGGCGAGGAGCGTCAGCAGGTCAAGTACCGCTTC  
CTGGATGCGATCTACCCGCACCTGATGGCGCTGAAGGCCGAGCGCGAGT

>CONTIG\_577\_length\_441\_cov\_0.920382

GTGAAGAGGACGTCCTCATCAGCCGGCACGCCCAGGGCCTGGGCCAGCAGCAGGCC  
AGGCTTGGCCAGGTGGGCGCTCTGCACCAAGCGGTACTCCACGCCGCGCCAGGAGC  
AGCCGATGGGGAATTCCACGTATGAGTAGAACTCTGAGTCTCCCGCGCACATGCGC  
ACGATCTTGGACGTGAAAAATTTCTCGCCCGCTGTGTCCAACAGCGTCTGCTGGGTG  
TCCAGCTGCAGCGTCAGGAAGTACACGAAGGAGGCGCTGACGAAGCCGTAGATGTA  
GTAGATGTCAAAGGCAGGGTACAAGGACAGCGTGTCTGAGGGGATCTTGATCTGGG  
AGGACACAACTCATCCTGGTACACCTGGGGAGCAGGGGGAGGAGACAGCATCCG  
GTGAGGCCCTGTGCCAACATCACGGGCCACCGCCAGCTTCCCTCTGCAT

>CONTIG\_578\_length\_441\_cov\_0.885350

ATCTGGGCGTGGACACCGTCACCGATAACGGCGACAAGCTCACCGGCTTCATCGAA  
CTGGATTTCTTCGGCAACGCGCTGGCCAACCAGGTCAACAATCTGTACGGCGGCACC  
TTGCGCCACGCCTACATGAGCTGGAATAACTGGCTGGCCGGCCAGACCTGGTCCAA  
CTTCATCGATTCCACGATCCTGCCCCGAGGCCGCGGACATCGTCGGGGCCGACCGACGG  
TGCGCTGTTTCAGCCGTCAGACCCAGATTGCTACACCCGCGGTGCCTTCAGTGTGTC  
GGCAGAAAATCCCGAGACGCTGTCCACGCCCTACCAGGGTGGCTACACCATCCTGG  
CCTCGGACCATGGCGCGATGCCGGACCTGACCGCGCGCTACAACTGGAAGGGCACC  
TGGGGCACGTTTCGGGCTGTTCGGCGATCGCGCGCCAGTACCGCACGC

>CONTIG\_579\_length\_441\_cov\_0.831210

TCGTGCAGCACGGCCTGCAGCGCAACGGAAACGGTGTAGTAATCGTTTCCGTTGCGC  
TGCAGGCCGTGCTGCACGAACACGACTTCGCGGATGCTGCCGAGGTTGCCATCAAG  
CGGATGGTTGGCGTAGACGGGGAAATCGTAGCCCCGCTGCATCGGTACCAAGATGCA  
CGCGCTGCCAGACGGGCCCCCTGAGGCTTCTGCGCAGCCGACGCAGCCGCGGTCTGTTT  
CCGGCGTCTGCGGCCCCGCGCATGCGGCCAGCCCTAGCATCGCAGTCATGGCCACTC  
CAAGCGCCAACCGGCGCCAGCCCCTCAAACCATCGCGCTTCATATCGTCTCCGTGGT  
GGATGAAACACGCGCCTACCCGCCCCCGCAGGTCCGACGCTCCCGCAGTCTCGATC  
AGTCGTCTGTGATTGGCGGGCAATTCCGGGAACAGCACTTCGGTAA

>CONTIG\_580\_length\_440\_cov\_3.166134

GCGTTTATCGCAACTCGACGTTTTAAGATCCCCAAGACGCCTCGATTACTTAATCTTG  
TGGGAAAAAATCTATTGAAGGACTCGACGACTTCAATGCATTAGGTAACTCTGAAC  
AACTCTTTCATGAGCTTTCGACCAACAAACGAGGCAATCTCTACAATGCGAAAATGC  
TTTATTTCCAGCATGCGTGACCGATGAGGTAGGGAGTGTCAGTCTTGCGAGTTGACG  
TAAGCTTGGCCGAAGCTAGATGTCAACTGATTTGAAAGAATTCCTGGCTGTGCCCCGT  
CTGCAGAACTATTAAAGTGGACGTCATTTGCAGCGCTTGTCCGATAGATCGCTCCA  
GAAATACGCTGCGAACGATGTCCATCGCCTACAAGTACGACTTACCGTTTTATGTGG  
TATGTCTGCAAGCGTGTTTGAGGGTCACTCTGTGACAGCG

>CONTIG\_581\_length\_440\_cov\_1.591054

TTGAGCATCTGCAAGCCAACCACTGCGGTGGCCGGGAACAGCTTGCACACGCGGAA  
GCCCAGGCCCATCAGGGTCAGCAGTTCAGTCGGCGTGGCCGCGCCAGGGACGGCCG  
GGATGGGTGCATCGGCGAGCAGGCGTGCCAGCGGCGCGGGGGTGCCTGGGGTGACC  
AGAAAGTCCGCACCGGCATCCACCGACTGACGCAGTTGCAGCTCGCTCAGCACCGT  
GCCGGCGCCGATCACGATGTTGGGCAGTTCGCGCTTGAGCATGGCCAGCGCTTCGAT  
CGCGATCGGGGTGCGCAAGGTCAGCTCGATTGCGGGCAGGCCGCCTTCGAGCAGCG  
CATCGGCGACGCGGCGCGCCTGGTCCAGCGTGTCCACAGTGACCACCGGCAGGATG  
CCGGCATCGCGCAGCAGCTGTTGCGCGGTGGTTTGGGTCTGGGCAAT

>CONTIG\_582\_length\_440\_cov\_1.035144

TTTCACGACACCCCTGATGCGCTTGAATTTAGGCAGAGTCAGAAAATGATGGGTGTA  
GGCAGCCCGTAGCGGTGCCCATTTCCATCGAGGAGACTGATAGCGAGGAGCAGTGC  
TGGAGGACTGCAATTAGCCTGAGGGTTTGTTCATGATTTGACAGCTCCGCCGGAT  
AACGGGGTCAAGCTCACTTAGCAGTCGATGGCGCTCTGCTTGCGGGGCCGATGAGC  
GGGCCTTATGCCCCGAAAGCGGCGGGTCTTGGCTTCGACCATCGCGCGGAAGGCAT  
CGTGGCCCAGAGCTCGCTGCTGTTAGGGTGTCTGGACGCTAACGTGTCGCCGTTTCGT  
AGGCGGGTTCGAAAGGCTGCTGAGGACAGGGTGATCAGACTTGCAACCCTGGTGCAT  
CCGGCTTTTTACTCTGCTCCTGAGCTTCAATGCTCATCGCGAGTG

>CONTIG\_583\_length\_440\_cov\_0.805112

TTTCCACAGCGCTAATTTACCAGGGAGACGGTTGGAGAGTCGCCGATATTTGCTTC  
TCTTCAAAGTCTGCACAAGGATGTGCAGGCTCTTGCGAAGGGAAGCGCATAACAGC  
GCTCGTCTCGCATAGTTAACTTGTGACGTAGCTTGCGTTTGCGGATCTACCAACGTTT  
GTTGGGACCAAGGCAACTTGAGGTTATATGGTCAAGCCGCACGGATCATTAGTATCA  
GTTAGCTCAATACATTGCTGTACTTACACACCTGACCTATCCCCTTTCTTTTGTCTCTT  
TTTCCTTTCTTTTTTTTTTGTTCGCGGAAGTCTCATCTTGAGGCGCGCTTCCCGCTTAG  
ATGCTTTCAGCGGTGTGCGCTTCCGAACATAGCTCCCCGGCAATGCCACTGGCGTGA  
CAACCGGAACACCAGCGGCTGTCTCTTATACACAGTT

>CONTIG\_584\_length\_440\_cov\_0.795527

GGCACCATCGCCGAGGAGGCTCACGCCGCCCTGCCGGCAACCTTGGGGGCTCATGC  
CGAGAAGGCTCCCACCCAGCACACCAAGAAGGCATCGGCTGAACAGGCCAAACGC  
GCCACGACGTACACCGCTCGGTTGCGGCTTCTCGCGTCCACCTCAACGTCCGTTCT  
GGACACAGCACTGAGTATCGACGCTACGGGCTCCTCCGTCCCGGCGACAAGCTCCTT  
ATTATCGGCGAGGATGTCCGGGGCTGGACTCCTGTCAACTATCGCGGCAAGACTGCC  
TGGGTGGCCACCCGTTACATCACTAAGGTGAACCGTCCGGTCCGGTATCTACGCCAG  
CGTGGCGATCACAATGCCCGCTCGAAGGCTGTCCAGCGCGACCTATCGACCCTCAAC  
TACTTCCCGGCCAAGTGGGTGCGCTTGCCCTATGGCCCGATCAC

>CONTIG\_585\_length\_440\_cov\_0.699681

GCTTTCTGGCAGATGACCTGGGAGCTGGAGAAACTGACCCAGTGAGCCCATCAGTA  
AATACTGCTTTGCCCAGCCGAGGCTGTGGAGGGGTTTCCCTGTTGTATCAGGAAGGT  
CACAGGGGAAGGTTGCAAGGAGGCACTTGGGGTAGAAGCCAGGTGGGAGGAGGCA  
GAGGCTGGAGAGATTTCTCTAGCACCCAGTGCTCTGCATCAGGGTTTGCTCCTCAGA  
GCCACTCCCCAGAGTGAGCAGACAGCCTGTAGCCCAGGAGCTCCAGCTTAACGGTC  
AACCGCCCTGAGCTGAGAGTCCCACCCCAAACAGGCTGGCAGGATCCTGAGACCTG  
GAGCAGGAAAACCTCCATTTTCAGATAGGCTTATGTGTGGGTAAACTCCAGCCAAGCT  
GGAAGCTTCCTTTGTGAGTGCCTGGAAATAGACCAGTGGTCCTCAGC

>CONTIG\_586\_length\_439\_cov\_0.858974

GTTCTAGGCTAGTCCCCGTGTCCAGCATGACTGTTCTCGTCCTTGGGTCCGGTGGCCG  
CGAGCATGCCCTTGCCTTGGCCTGCCATCGTGACCCAGAGGTTGCCGCCGTCCACGT  
CGCTCCCGGTAACCCGGGGACGGCATCCTTCGCCACGAATCATCCGTTGGATCCGTG  
CGATTGTGATGCCGTTGTCTCCTTGGCGCGTGGCCTGGAAGCTGACCTCGTCGTCGT  
CGGCCCGGAGGGCGCCGCTGGTTGCCGGGGTGGCCGATGCTCTGCGCGAGTCCGGGA  
TCGACTGCTTCGGTCCAAGTGCCGAGGCCGCCAGTTGGAAGGGTCGAAGGCTTTTCG  
CCAAGGAAGTGATGGCTGCTGCCCCGTGTGCCGACGGCAGCCTCCCGTTCTTGCGACG  
ATGCCAATTCCGTCTCGGCTGCCCTTGACGAGTTCGGGCC

>CONTIG\_587\_length\_439\_cov\_0.810897

GAGGCGATGCCGCCGGTGCGGTTGATCCAGGAATTGGTGCTGCGGATCGAGATCGG  
CAGGGCCTGCGGCGTGCCCGGGTTCGATGCCTGGCCCGGCGACCACCAGTGGCCCT  
GACCCTTGTTTTCTGTTGATAGACCTGGGTGTGCAGGCTGATCGCATCGTTGGGCT  
GGAAGTCGCCGGCCACGTAGAACAGATCGTCGTCGCGCAACGCGCGGCTCTGGTAA  
TAGGCATCGTCGACGTTGTCCACGCCGCCACTGAAACCACAGCGTGCCGCCTTCCGC  
TTTTCTTTTCTCCCTCCTCCTTCTCCCCTTCTCTTTTCCATTCTTTTCTTACATATTC  
CATTCCCAACCCATTCCACTCTCCATTCTCTTTTACATATACTAATATTCCTCCTT  
CTATTTTCTCTATTTATCTTCTAACTCTTTCAACTTTC

>CONTIG\_588\_length\_438\_cov\_21.057878

CCAGCGAGATCCTCAACGCAGAACTCCCCACGGGACAGTCCCCATCGTTGCCATCA  
TCGATGCCGGCTTCTCCCTGGCGCGCACCGATGCCGACGAGCCGGAGCGGTGCGCC  
ATTCTGATCAGGCCTGCTTTCCTGCGCTTGGCGCATTTTCGAGCGCAGCCTGTATTTTCG  
GGACATCAGGCAGTGCAAACAGCGATCAATTTCAAGATAGCCTGCGAGTCAAAGAT  
GCCATCCACTTTGCCGACGAACACACGCAGCGCGATGCCGGCAAACCCAATGACCT  
AGGCGTTGACTTGTCTGCGCTCTACCTCCGCCTTGCCGAGCAGATTGCCGCAAGTCG  
CGCGCATCGCCTCTGGACCGGACGCCCCGACAAGCGACAACATCACATCGAACGCGC  
AGTTCCTGGATTTTCGGCGGCTTCCGCGCAGTTCCCAGCTGGA

>CONTIG\_589\_length\_438\_cov\_1.012862

ACCTGATCTTGACGAGCCCCGCGTTTTACCGGGCCGCGAGCCCCCGCCGTCGAGGGCA  
GCAATACCAAGATGATCGGCGTAGTGCTCTACACCGTTTATGCCTATCCATTCGAAG  
TCGCGGCGATGATTCTGGTCGTCGCGATGATCGCCGCGGTGACATTGACCCATCGCA  
AGCGGACCGATGTTTCGTGTCGTGAAGCCGGAAGAGCAGATCGCGGTGAAAGCGAGC  
GAGCGGCTCAAGGTGGTTTTCGCTCCCTGCGGAAAAAGAGTGACAGGAGCATTTCGA  
ATGACCCTTACGCACTATCTGTTGCTCGCAGGCGCGCTGTTTGTGATCAGCGTCGTG  
GGCATCTTCTTGAACCGGAAGAATTTGATCGTTTTGCTGATGTGTATCGAATTGATG  
CTCCTCGCGGTCAATACCAATTCATCGCGTTTTCCCATTT

>CONTIG\_590\_length\_437\_cov\_1.041935

CCTTGAGCACCTTGCGCATCTCCGCCGAGATGTTGCCGGCCCTGACGGCCAGCTCCA  
GGCGGATGTCTTCGAGGCTCTGAGCGAAAGCGTTCGAATCGTTGATCTGCAGTTTCT  
GCAAGACCCGGCTGTAGGCGGTGGTGTCCGCTTCATCGATCAGAGAGAGAACGATG  
CTACCGTCCGGACGAGGCCGACTGAAGGTGGCACGTAGTGGGGCGAATAGCTTCTC  
GACAAGCTGTCGATTACCATTTTCCATTGACGAACTCCAGTTTACGTAGGAACACCT  
ATGAGTAACTGAAAGTCATTTAGTTCGACGATGGCCGCTATTTTCGCGCCGTTATAGT  
GATGAATGTCGCATTTGTCTCGCTATTCAGCGACTCAGCGCCTGGCGCGTACGCTCG  
ATCAGGCCTGGCAGCGTATCGGCGCTGTATTGGCCCGGGT

>CONTIG\_591\_length\_437\_cov\_0.974194

CTTGAGCACGCTCCTCCCCAGCCCTCCCAGCCGGTGCGCACCCGCGGAAGCCGTCAT  
TGTTTCGAGAGATCCCATCGATAGACGAATGGCGCGCGGGCCGGAAGAACAAAGACG  
CACAGTTGGATCCTGTGCGTGCCAAAAAACGGCCGACCCTTCACTGAGTCTACCGAG  
AGCATATAAATATTGAGCCCCGCACTGCGGGGCTCTTTGGTTTCAGTGGAAGCGCGG  
CGGCCGGGGAACGTAGGCCGGCGCAGGAGGTGCGACGATGACAGGGCTTGGACGC  
GGCTCATCGGGTTCATTCGCCATGTCCAGTGCCAAGGGATAGCGCTGGAGCATGTCT  
CGGCTCCACACCTCCAGGTGCGCCGCGCTGGCTGACGCGTCTTTCTCGCAGAGCGCT  
TGTTCCCTCCGGGGTCACCCTGGCCCTTGCATCGGCCAGTTC

>CONTIG\_592\_length\_437\_cov\_0.964516

GTCGAAGCCTGTAAAGCGGCGGTGCACAATCTTCTCGCGCAACGCGTCAGTGGGCT  
GATCATTAATATCCGCTGGATGACCAGGATGCCATTGCTGTGGAAGCTGCCTGCAC  
TAATGTTCCGGCGTTATTTCTTGATGTCTCTGACCAGACACCCATCAACAGTATTATT  
TTCTCCCATGAGGACGGTACGCGACTGGGCGTGGAGCATCTGGTTCGATTGGGTCAC  
CAGCAAATCGCGCTGTTAGCGGGCCCATTAAGTTCTGTCTCGGCGCGTCTGCGTCTG  
GCTGGCTGGCATAAATATCTCACTCGCAATCAAATTCAGCCGATAGCGGAACGGGA  
AGGCGACTGGAGTGCCATGTCCGGTTTTCAACAAACCATGCAAATGCTGAATGAGG  
GCATCGTTCCCACTGCGATGCTGGTTGCCAACGATCAGAT

>CONTIG\_593\_length\_437\_cov\_0.829032

CCCATCAACAAGCGGAAACCCAAAAGCAACATTCAAAAACGACCTCGATGCCGCCC  
GCACCGCCATCGCACACGAGACAGCGCAAGGCCGCGACGTGGTACTCATCGCGCAC  
TCGTACGGCGGCATGGTAGCCAACAGCGCGATCAAAGGCTTTACTGCCCCCGAGA  
CGAAGATTCGCAGGGGCCATGTAGTAGGTCTCGTGCTCATCGCGTCCGGCTTCACGCT  
CACGGGTCTCTCCTTCATGGACCCGTTTTTCCACATTCCCCCGCCTACATGGCGCGTC  
AATAAGGAAACGGGGCTTCGCAGATTTTCGTTACCCCGCCGCGGCAGCTTTTCTATCAC  
GATTTGCCTGAGGAGGAGGCGGAGGAGTGTGTAAAGCAGCTCACGCCGCAGAGTCT  
GGAGGCGCTGTTTAAGGGCGGAGAACACTCGTATGCTGGAT

>CONTIG\_594\_length\_437\_cov\_0.761290

GGTTTGCTTCAAACAATTATCGTTTATTGCTCACTTCTATGGCGGGCGCAGTTTGATA  
ACTATGTGAGCATCGGCCCCGGCGTGCTTCAACCACGCCCCAGGCGGACGCTCACCC  
AAGCTGCTCCTACGTTGCTGCCGTTGTCTTATAGGTCGGTTATGCCATCATTTTCCCG  
GCACTGGTTGAATGGGGGCATGTTGCAACCAGTCGTCGTCCTTGCCGGAGGGCTCAG  
CCACCAGCGCGACATTTCTCTGAAGTCGGGTTCGCACCGTTGCACAAGCGCTGCGGCG  
GGTCGGACACGAAGTCGTGGAAGCCGATATTGACTCCGCGCTCATTGAAACCTTGCG  
TGCCAACGACGGTGCCGTCGTGTTTCCCATGTTGCACGGTGGTCTTGCGGAAAATGG  
TGCCCTTCTTGAAGTGCTTCAGCTCATGGACATCCCC

>CONTIG\_595\_length\_437\_cov\_0.725806

GTGCAGCAATCCGGGCTTCAGTTCGGCGTACACGGGCCGCCAGGGCATCAACAAGG  
TGGGTTCGAACACGTTCCACGATATCCAGGTGCGTTATGTGCTGCCGTGGAATGGCA  
CGGTTTCGATGGGTGTGAACAATGTGTTTCGACCATCAGGGTCCGATCATGTACAGCC  
AGCCGAACAGCAGGTTACGTACTACGGTGGGTTCGATATCGGCCGTTACATGTACA  
TGAAGTATCAGCAGCGTTTCTGATCGGGTTCGCCTGATCATCCTTTTCTGATCTGCGG  
CTTACTCTCTCCAAGCCGCCGAGTGGAAGTGAGACGGCGCCTTCGGGCGCCGTCTTT  
TTTTTGCGTTGCCGTTTTGAAGCGACGGCTTCTGGATCGATGGCTTTTAGAGCAACA  
GCTCTTTGGAGCAACAGCTCTTTGGAGCAACATCGCTT

>CONTIG\_596\_length\_436\_cov\_0.741100

GATCCGCAGCTTCTTCTGGCAGACCTTCTACACCGGCAAAACCACGCCCACCTCCGG  
GCAGTTCACCTATGGCGGCACCACGTTCGCAGGCACCTCGATGGCATCGCCGCATGT  
GGCCGGAAGTCCGCACTGGTGCAGAGCGCGCTGATTGCCGATGGCAAGCCGCCGT  
TGTCGCCCGGCAGCGCTGGAAGCCTTGCTCAAGCGCACCGTGCGCGCTTTCCCGGTGC  
CGATTCCGCCGGCGACGCCGGCTGGCACCGGGATCGTGGATGCGGGTGCCGCGGTT  
GCGCGCGCCTTGCGGCGGTGCACTCCGGGCGATGTGGGCTGCCAGGTGGATGCGCA  
ACCGCTGCGCAATGGCGTGGTCCAGAGCGGCATCTCCAATCTGGCCGGCGATGCCG  
GCGTGTTACCTTCGAGGCGAGCGCGGGTGCGGTGCTGAGT

>CONTIG\_597\_length\_435\_cov\_0.860390

GCATGCGTTCCTGGACAACGGCGGGCGCCATGGGTGAACGTATCCGGGACATGGACT  
GGTCCGGGCATGCGCTCGGGCCGGTGTCCGGCTGGCCGCCCCTGCTGCGCACCGGC  
CTGTCCATCGTGCTCGGCTCGGCCTTCCCGACCTTCTGGCCTGGGGCGAGGGCCTG  
ACCCTGTTCTTCAACGATGCCTACCTGCCGATGCTCGGCAACAAGGCGCCGACCGCG  
CTCGGCGCGCCCCACCCGAAGTCTGGCACGAGGTCTGGCACGAACTGGAACCGAC  
TATCCGGCGCGTGCTGGCCGGCGAATCCTTCTTTTTTCGAGAACCGGGCGGTCATGCT  
GGAGCGCCACGGCTACCCCGAGCAGGCCTGGTTACCTTTTCCTTCAGCCCCCTGCG  
CGACGAGCTGGGCGCGGTGCGCGGCCTGATCTGCACCGT

>CONTIG\_598\_length\_435\_cov\_0.730519

CGTCGATGTCGAAGTCCTGCAGGGTCAGGCCCTGGCGCGCCAGCATCTGCGGCACT  
GCAATGGTCGGCGCCATCAGCAGGCCTTCGCCATGCACGAAATCCACCGCCGCCAC  
CTGTGCATCGCGCAGATAGGCCATCGGGGTGTGGCCGTGCGCCAGCGCCCAGGCTT  
CGCTGGACAACAGCACCGCGGCAGCACCATCGGTGAGCGGGGTGGAATTGGCTGCG  
GTCAGCGTGCCGCGACCGGAAGTCTTGTCGAAGGCCGGGCGCAGCGTGGCGAGTTT  
TTCCAGCGAGGTGTCGGCACGCAAAATATTGTCGCGCGAGACACCGCGGAACGGGG  
CGATCAACGAATCGAAGAAGCCGCGCTCATACGCTGCCGCCAGCTTGTGATGCGAG  
GCCACCGCCACGCGTCCTGCGAATCGCGCGCGATGTTCCATT

>CONTIG\_599\_length\_434\_cov\_25.026059

GCTGAAAACGACTGGACCTTGCTACGCCGCTGATCACCAGGGGCGACGATCAAAGCG  
CCCAGACAAACCAGTAGGTCTTGCGTCAATGATTGCTTAGATACAAGCGCTGCAATT  
GCAGCGAGTGAAATAGGGATACCTAAGAACTTAGTCGCGTTATCAACAACAAGTCC  
ATTGAGCTTGCCGAAGAGGTTCAACTCAGCCTCGGCGATATCGCGAAGGATACCGTC  
AAACGAGAGCTTATTCACCACGCATTCAACATCGTAGGCAAAGCGCTCCAACACTTT  
TGGCCAACGCTGGACCAACGCAGAAAATCGGCCTTCGATGTGCGGACTCGGTCGCCA  
GGACATCGGCCACACCCAATCGAAATAGTGCCTTGTATTCTTCGGTCCTAACTTTTCC  
CTTGGCGTCTTCTTCTAATAGGTCTTTGAGCAACCCT

>CONTIG\_600\_length\_434\_cov\_0.840391

TTTCAGGCCAAAAGTCCGCAACTGCTGCGGTGTGGGGCCGACAAAAATCAGACCGG  
CAGCCTCGCACGCCTCAGCAAAGGCGGCGTTTTCCGAAAGGAAACCGTAGCCAGGA  
TGAATCGCTTTTCGCCCCGCTCTGCTGCGCGGCGGCGATGATCTTTTCCGTCACCAGA  
TAGGTTTGTGCAGCCGGGCCTTCGCCAAGGCTTAGCGCCACATCCGCCTCGCGGATA  
TGTAACCTGCTCAGATCGGCTTCGGAGTAAACGGCGACCCCTTTCACCTGCATGGCA  
CGCAGCGTGCGCAGGATGCGACAGGCGATAGCACC GCGATTAGCAATCAGTAAGGT  
ATCAAACATAAGCGAACTCTCAGGGATGCGGGTCGTCCCGCAAAATTTCGATATTCCC  
TGGGGCCGTCCCCGGGGCTGACCGGCACGTAACAGGCG

>CONTIG\_601\_length\_433\_cov\_20.049020

ATCGTGCGTCTTCGGAAGGGCGCAGCATATATCGAGCGTCAGCGGTCTCTCATCGAG  
CGAACTGAACGCCGCTTGGAACTCGTTTCAAAAAAGGCCTAGGCTTCCTATCGACGC  
TTACGGTCACCAGAGCGCGGTATGGGGCTATCGGTTCGTCGTAAGAAAATATCGC  
CGGAAAGCTGGAGGTTGCGATCAGCTACGCCGCCTGGCGCCTGGCTCATATTGATCC  
AACCGAACGGCTTAGCCATGTCGTTTCTGCGGTGCGATTGTTGGGAGAGCATGCTGG  
TGCTTGATGACCCGCGCCGAACACGAGGCCAGTCCCAACAACATGCAGGTGCCTT  
ACCGGCAAGGTGAGCACCAAGCCCCGTGCTCCTTTCACCAGCCCATCGAGTCAGG  
CAATCGCTATCCATGGATGCGCAGCGCATGGTCAAG

>CONTIG\_602\_length\_433\_cov\_1.117647

GCTGCTGGGCCGTGGCGACGACGCCGGCATGCGTCGGCTGGCGCAGCTGTATCGCC  
CGCTGGTGCCGGTGGCGGCGCTGTGGTGCGAAGCGCAGCTTGCCCAGCGGCTGGCC  
GATTGGCCGGCGCTGGAACAGGCCTGCACCGCGCTGCTGGAATTGTCGCCCGGCTC  
GCATGGCGCACGCGGTTTGTCTGGGGCGCATGTATCTCAACACCGGGCGCTTTGCCGA  
AGCGGCCGAGGTCTACCGGCAGCTGACCGAGCTGATGGAAGAGCCGCGCTCTGCGC  
ATTGGGATCACATGACCGCGGCCAGTGCGGCGCAGCAGTGGGAGGCAGTGCGTGCC  
TCGGCGCTGGCGATCGGCATGGAGCTGAGCAGCACCAGCGGTGTGGTCAAGAGAA  
CTGGGGTTGGGTGCTCGTGCGTTGTGTGGACGACGGCGAG

>CONTIG\_603\_length\_433\_cov\_0.676471

GCTCAGCAGACTGGCGCCGAAGGCATAGAACTTGTTGCGCGTGGCGAAGTACACCG  
GCACCGCGATCGCGATGGCTTCGGGGATGTTGTGGATGGCGATCGCGAACGCGAGC  
GGCATGCCACTGCCGGGCTTTCCAGTGTCGCAAAAAACGTTGCCAGACCTTCGGGG  
AAATTGTGCGCGGTGATCGCAATGGCGGTTCATCAAGCCGACCCGGCGGATGTAGGC  
GCGGTTGTCGTCGCGAAACAGCGGGTCATAGATGGAGAGGCTCTGGTGCGGGTTGG  
GCAGCAGGCGGTGATCACCATGATCAGCAGCATGCCGGCCAAAAACGCCAAGGTG  
CCGAACGTAAAGCCGAGCTTGTCGTTATAAGCGTTGGAGAACGAGGCGATCGACTT  
GTTGAGGATCTCCGATAGCGACACGTACACCATCGCGCCG

>CONTIG\_604\_length\_432\_cov\_18.386885

GGCGTCAACGCGCTTGACTAACGCTGGGTTCGAATTGCAGTCGCTTGGTGACACGTTC  
GGTTTTGACGGGGATTTTCGGCAGTGCCGATGTTTGACGGGCCATGTGGTTGTTTCT  
AGAGCGGGTAGCGGTTGGCTACGGCGGTGGTGATGACGACGCTGATCGTGACGCCT  
AGTTTTTTGGCGTATTTGCTCACGCCGTTGTGGATGGGAACAGAGAGGTGAAAGCGC  
AGGCGTTCTCGATCTAACTTGCGGTAGATCCCGCCCGCGACCAGTGTCGTGGGTGTC  
AGCAGAAATTCTTCCATGAGTTGTTGCATAAACATGCGTCGGCTGAGTCCGGCGCGC  
TGTGCATCGCGGTCAATCGCTTTTCATCTGCTTAGGGGCCACGTTCGCGACAACCTGT  
CGCCGAGCGGCTTTTGCAGGCATAGCTTTTGGCT

>CONTIG\_605\_length\_432\_cov\_1.006557

GGGCGGACCGGGGTCGACGACAACTCGATCGCACCGAGGCGCAACACCCGCCTGCC  
CCGTACTTTCCCGCCATCCCAAGTCACCGTTGTGTCGCTCGTCAGCATCGCCTCACCG  
GACTCCAAAGCAGCCGACTCCGAGAGCGGGACAGCGGCCCCGGATGAGGGCGCCACT  
AGTAATGCGCGAGGTACGTGCCACCGCCAGCCACGGTTGCCCCGAGCAGCCCTGGAG  
GGCAGTTGCGAGGAAGGTCAACCCCCGTGCCACAGGCCAGTAGATACGACGCGGAA  
CCCTCCCCTCGACTGCGAGCAATCCACCCCGGGCGAGCGAGGGAAACGACGGTGGC  
GACGGCATCGTCATCGGTGATGTCGGTAGGGGGAACGTCGTTGATGAGCCGGGCCA  
GCCGATCAGCTTCGCGGCGCCACATCACAGCCTCTGGG

>CONTIG\_606\_length\_431\_cov\_3.368421

GCCAGAACGGCATGGTGTTTCAGCGTCCCCCGGCTCGGCGTCATGGAGCAGGGCGAG  
CTGGAGTTTGTGGAGAGCGGCGCCACGCCCCCTGGCTTCACCTGGGACTTGCTGGCG  
TATCCGCCGGACCTCTCCAGTCTCAAGTTCAACGCCGACAGCCAGACCTTCGAGGTG  
GATCTCGTCGATTCAAAGGTGAGCTACACGAAGATCGATGACGACGTAAACACCTA  
CTTGCCCCGGCTTCGCCAAGGATCGCACCCAAGCGGACTTGGTGGGCTGGCTTGACCA  
GAAGATCCGCGATCCAGGGGTCAAGCAGCCCGTGCTTCGGGAGTGGCTGCGCCGAG  
CCATCAGTGCTCTGTCCGAGGATCGCGGGTTCTCGCTATCCCAGTTGCTCAATGGCC  
AGTTCGTCCTGCGGCGGAAGCTGGGTGAACAACCTC

>CONTIG\_607\_length\_431\_cov\_0.516447

ACATCAGCTCGCTCGGTGTCACCGCGGTGGAAGTCTCCCCGTGCACGCCTTCGTCTG  
ACGATCAATATCTGCTGGAAAAAGGTCTGCGCAATTACTGGGGCTACAACACGCTG  
GGCTTCTTCGCGCCCGCAGGCGCGTTACATGTCCACGCGGACCGTGGCCGAGTTCAAG  
CAGATGGTGGCGCGCCTGCATCACGCCGGGCTGGAAGTGCTGCTGGACGTGGTCTA  
CAACCACACCGCCGAAGGCAGCGAGCTGGGCCCCGACGCTGTCGTTCAAGGGCATCG  
ACAACGCCAGTTACTATCGCCTTGCCGAAGACAAGCGCTACTACATCCACGCCACCT  
GCACCTTTACACTCTGAATCTGAGCAATTCGCGGGTGATCCAGATGGTCAACGACT  
CGCTGCGCTATTGGGCCGGCGAGATGCATGTGGAC

>CONTIG\_608\_length\_430\_cov\_146.425743

GCTTCGCCTGTCGGTTCCACGAGGCGCACAAACGCGCTGGTGGAGAAGAACCGATG  
AAGCGCACCCAAGACATCAAGGCTCAATACCAACTCCAGATGGACGAGGAGGGCAT  
CTTGCTCGCAGCAGCCACCATCATGGAAAAACGCCTTCAACGCCAAGGCCGCATCC  
ACAACCCCGAGCAAGCTGGCGACTACCTCATTGCCCGCTGCGCTACCTGCCGCACG  
AAGTCTTCGGGGTCGTCTTCCTGGACATCAAGCACCATATCCTGGCAACCGAACATC  
TCTTCTTCGGCACCATCGACGGCTGCGATATTCATTCCCGAGTAGTCGCCAAGCGCG  
CCCTGGAATTGAACGCAGCTGCCGTCATCCTTTTCCACAATCACCCAAGCGGCAATC  
CGGAGCCAAGCGAAGCCGACCGCAAGGTCACCGA

>CONTIG\_609\_length\_429\_cov\_1.102649

GACGAGGGCCGCTCGCTGCCCTGGGACGGCCAGAGTGCCGGCAACCTGGTGGTGCG  
CGGGCACTGGGTCATCGCCCACTACTTCAAGAACGATGGCTCGCCGCTGGTCAGCGT  
CGACGGTGAGCCGGGCTGGTTCCCGACCGGCGACGTGGCCACCATCGACGCCGACG  
GCTTCATGCAGATCACCGACCGCAGCAAGGACGTGATCAAGTCCGGCGGGCGAGTGG  
ATCAGCTCGATCGACCTCGAAAACATCGCGATGGCCCACCCGGCGGTGCACGAGGC  
TGCCGTCATCGCGGCGCGCCACCCCAAGTGGGACGAGCGGGCCGCTGCTCGTCGTCGT  
CAAGAAGCCGGACGCCTCACTCACCCGCGAGGAGCTGCTGGCCTTCTACGAGGGCC  
GCATCGCCAAATGGCAGATCCCGGACGACGTGGTC

>CONTIG\_610\_length\_429\_cov\_0.807947

TCATCCCCAGCGTCAAAAGTTAGGCTTGTTCACTATACTAACCACGAAATGCTTAGC  
TATTGCTTTTTTGACCTATTGGTTGCAAGTTAATCCTTTCTAAGTCATTGCTCCATGGT  
GACGCTGGTTGGATAGAAGTTTCGGGGGCACTGAGAAGTGCAGGTACTGTATACTG  
TACGTACGTATACGTACTGTACCTCAACTACCGATTTGTAATCAGGTACGTCATTTA  
GCACCAAAATACACTGTACGTACAGAACTTTACTTGCAGCCAGCATGGTTGCCACG  
GGTTCTTGTATTTTCGGGAACATTTCGGAGTTCCGTAAGGCCTTGCCATCTCCATCGCC  
ATGGAGTATTAAAGCACCGGCGCCGTCCGGCTTCGCTAAGCAAACGGACATCTGGC  
TCCAACGAACAAACGACACTACCTATAAT

>CONTIG\_611\_length\_427\_cov\_27.100000

TGCTTACTTGCAGCCGGTTCTGAGCCGTCCACCTTGGTCGTTTCATCGGGCGCAGTTCG  
AAGCGCTGGTGCGCGCCGTGTGGGTCCTTTACTGCGCAAGCGACACCGACGTGGCTT  
GCTTGCAAGAAGAGCTGACGCCGATCAGTGAGTCCGTGGCGGCTCGTTTGCCAATGC  
TATCCAAGATGCTGATCGATCTTGAAGCAGTGAAGCAAGCAGCCGAGCCACTGCGG  
GTGTTTTTGGAGTTCAAGAAATACTCTTGGGCGGCACTCAACTCGTTTGTCCACGCG  
GGTGCACACGCGCTTCATCGGTTGCGAACGGGCTTCCCGCTTGAACCTCGTTGAAGTT  
GTGGTCAAACAAAGCAACGCGTTGGTCGTGATGGCTCACATGCAACTCGCAATCAC  
CGCAGGTAGCCAAGAGGCGGTGCGCTGGG

>CONTIG\_612\_length\_418\_cov\_42.082474

AGGGTCAGTTGCCGGTGTTCCATCCACTTTTCGTAGACCGCCATGAAGGTGTTTTCG  
CCAGCCAACCGGATGGCCTGGCGTTTTTGCTTTCGGTCGGTGCGCGGGTTGATGCCC  
TTGGCGACGAGGGCACGGGCTGGTCACGAAATTCGCGCGCCTCGCGCAGAGAGAG  
TTCGGGATAGCTGCCAAGCGAAATCCGGGCACGTTGTCCAACCCAGGTGTAGCGGA  
AGTGCCAGGCTTTGCCGCCAACAGGGGAAACGTAGAGGAACAAACCATCGAAGTCT  
GCGAGGGTATAGGGCTTGTGCGGAAGCCTTGGCTTGCCGGACGACCATATCTGTGAGC  
ATGCGTACCAACTCCTGATGCTGCGAGTTGGATGCGATGTTTGTTCTCAGGTGGCCT  
GCTCTTCCAGCAACAATGCGGA

>CONTIG\_613\_length\_398\_cov\_415.225092

CACAGCAAGGTCCACTTCCTGGCAACGGTCAAGACGAGTTGGACCAAGAGCACGAT  
CGAAAAGCCGATCGCCAATGTGGTGACCAGGCCATCGTCCTTGACGCTGAGCACCT  
GATCCATGGTCAGTCGCAGATACTGCGGCGCAATCAGCGCACAACCTTCCAAGAAG  
AGCGCCAAGATGCCAACAACCCAGAACGCGGGCACCAGGGACCGAAGCGAGCCTG  
CCAGATCGCGAAGCGATAACCGATGGCACACTCTTGATCTTCTTGAAGGCCGGGCCTG  
GATGCGCTTCCAAGGCAATGCCGCTAAAGAGTTCATCGAACTCATCGAGCTTGATCT  
TCTTGACGCCTGTTGCGGGATCGCTGATGTGCACATGCCCCCCCCGCACAGCCGTCA  
ACAC

>CONTIG\_614\_length\_390\_cov\_22.847909

TCGGCCCCGTGCCAGCGGCCGTGCAAACAGCCTTGAACCCGGACTCGTTGCAAGCCT  
CGGACGGCAAGCAGTATCAGCGCGATACGCAAGGTCAGTGGCGCCATGACGGCGTT  
GCTGCCGAAGGCAACGTCCCGCTGGAACCTAACGCAACGCGCGAACGCTTGCAACC  
GGCATTGGAGCAGCACGCGCAAGCGTTGGCACAGATGCCGGCAAGGCAAACGCCA  
ACGCCACAGCAACAATACCAGGCCAACACCGAGGCGACCTATGCCGCCTATGGCGT  
TGCGCCCAATGCCCAGACTGCAGGCGCGATCCAGCTTGCGGTGCAAAAAACCCGTG  
AGGCAAACGGGATTGATGCCGCGACCAGCTCTTTGGCGTTGGAGCGTGATGCGA

>CONTIG\_615\_length\_381\_cov\_19.055118

TGCGGCGCTCTTCATCGATCAGATAGGACATCGGATCGGGGAAGTGTTGCGCGCTGG  
GGTAGCTGGTGCTGGGGGCGCGTTGTGCGTCGATCTGGAAATACCAGCCGTCGCCA  
AGGCGGCGGAACAGGTTGTTTCATCTGGGCCGACACTGCAATCAGTTCGTGCTTGGTC  
GCGGAGTCCAGGTCTGGACCGCGATAGCGCAGCGTCGTGATCAACGACGCGTTGCG  
GTTTCAGCACAAACGCCGGGGGCGACCAGGTACGCCACGGCAGAACATCGCCAATGT  
CGGTGGGTTCGTTGCTGTATTTCGGAAGTCGCTGCATGGGTGGCCTTCACTGGATG  
CCGCCGGTCAGTGATCCGCAAGGGCGGAACACTGACCGGTAG

>CONTIG\_616\_length\_367\_cov\_32.320833

CGAGCGCGTGGACCTCGGGCAGGATGGCCGAGAAGGCTTCCAGCAGCCGCACGCGT  
TCCACCACGAATTTGTCCACCCAATCGTTGATGGTCTGCCGGTCACGATTGGCCGCG  
GTCTTGCGCTGCCCATCTGGGTCAGTGAAGAACCAGGCACGGGCGGCGCTCTCGCG  
CGCCTTGGGCGGCAGCCACCCGAGCGTGAAGTAGTAGGTTGTCTCAAAGTGCACGC  
CTGTCTCGGCGATGCTGCGGCGCTCTTCATCGATCAGATAGGACATCGGATCGGGGA  
AGTGTTGCGCGCTGGGGTAGCTGGTGCTGGGGGCGCGTTGTGCGTCGATCTGGAAAT  
ACCAGCCGTCGCCAAGGCGGCGGAACAG

>CONTIG\_617\_length\_362\_cov\_15.855319

CCTGTTGAACCTTGCCAGCGTGAGCACCTCAATGCTCGTGCCCTTTCAGTGGGAAA  
ACTGCCAGATGCTTCCGTTCTCTGGCTCAATGAGCGCTGGTTTCATGACTTAGGCAT

ACCCATCCACGACACGCCAACTCGAGCCCGCATTTTCAGCGTCGTTGCTTGAGCGCTT  
TGCCGTGACCTCCATCGAAGCTCACTGCGTTGCCGGCAGCTTCGGCGGACAGAACT  
GGGCGCGGATCGCTATGGTGGGAGCGGTGGGGCAATCCACGGAGGGAGTGGCCGCT  
GTGGCTCCGATGGCATGCTCATCGCCAAAGGAACCGGCCCCACGCCACTGGTCTCTA  
AGGCCCATGATTGGTCACACT

>CONTIG\_618\_length\_357\_cov\_24.834783

GCGCCAAGCGCTCTTTGATCTGCCGCACCCGCTCTGCGCCTGACAATCGTGTCTGCC  
CAACCGCTGTGCGTCCGTCCAATCCAGAAGCCTGTGCATTGGCCCGATCCCGAAGTG  
CTGTGCGCATGGCTGTGGGACGGTGGCACTTCGTGCACGATGCCGCCACTTTTGGTCA  
TGTGCTCAGCGACAATCTTTGAAAGCGCCAAGGCCGCAGCTTGACCGCCCCTACCTC  
TGACTTCTGCTGTGAACTTCGTTTTGCGCATCACCGCCACTTTGGCTTTGCCCAAGTG  
CTTGCCAGGCCGGCGCGTGAAGTTCGCGGGCGCGTTCAAACCTCTCCATTACGCGCGGC  
TTCGTGTGCTTGTG

>CONTIG\_619\_length\_357\_cov\_18.286957

ACTCGTCGCGATGACTTCAAGTGCTGCACGGAAAAATCCGTCTTCGAAACTTTCCGC  
CTTGCTGATATTGGTCATCCAAACCGTCCTTCGTTCAAGTCTCACTGCAAGCAACTTG  
CACCGCAAGCTTGCCACTCATCAGCCTGACAGCCTGTGGGCGATGGCACTTGCCCTGA  
AAATCCTAACGTATTCGTGGAGGAAGCACAGCGGGAAATCCGTCCGAAGTCTTGGC  
AACCAGCGCACCGCCTCTTGCTACCTGCGGTGATTGCGAGTTGCATGTGAGCCAT  
CACGACCAACGCGTTGCTTTGTTTGACCACAACTTCAACGAGTTCAAGCGGGAAGCC  
CGTTCGCAACCGATG

>CONTIG\_620\_length\_355\_cov\_9.289474

CTTCTCGCCACCTGCCCCCTCTCACTTCTGCTGTGAACTTCGTTTTGCGCATCACCGC  
CACTTTGGCTTTGCCCAAGTGCTTGCCAGGCCGGCGCGTGAGTTCGCGGGCGCGTTC  
AAACTCTCCATTGCGCGCAGCTTCGTGTGCTTGTGCTCGGAGACTGCGATGATCTAC  
CCGGGCCGGGGCACCCGCATTTTTCAAGTGCGCATTGATGACCAGTGCGATGTCTTT  
GCGGATTTGCCGCAGCGCTCGTGTGCCGCCGCCTTGTGCGCATCAAACCTCAGCGCA  
GGCGCGCTCCCCTAGTCCTCCCGGTCCGACTTGTGCGCGCTGACATCAGCAAATGCAC  
ATGATGATTGCG

>CONTIG\_621\_length\_354\_cov\_19.008811

TTTTCATGTGCTCAGCGACAAGCTTTGAAAGCGCCAGTGCTGCTTCTCGCCACCTG  
CCCCTCTCACTTCTGCTGTGAACTTCGTTTTGCGCATCACCGCGACTTTGGCTTTGCC  
CAAGTGCTTGCCCGGCCGGCGCGTGAGTTCGCGGGCGCGTTCAAACCTCTCCATTACG  
CGCGGCTTCGTGTGCTTGTGCTCGGAGACTGCGATGATCTACCCGAGCCGGGGCACC  
CGCATTTTTCAAGTGCGCATTGATGACCATTGCAATGTCTTTGCGGATTTGCCGCAGC

GCTCGTGTGCCGCCGCTTGTCGCGCATCAAACCTCAGCGCAAGCGCGCTCCCCCAGT  
CCTCCTGGGC

>CONTIG\_622\_length\_347\_cov\_36.309091

GCGTGTAGAGACCCGGGCGAGGCGCTGGCGCACGCGCCAAGCGCTCTTTGATCTGC  
CGCACCCGCTCTGCGCCTGACAATCGTGTCTGCCCAACCGCTGTGCGTCCGTCCAAT  
CCAGAAGCCTGTGCGTTGGCCCGATCCCGAAGTGCTGTGCGCATGACTATGAGACGGT  
GGCACCTCGTGCACTAGACCACCGCTTTTTTTCATGTGCTCAGCGACAAGCTTTGAA  
AGCGCCAAGGCCGCGAGCTTGACCGCCCCTACCTCTGACTTCTGCTGTGAACTTCGTT  
TTGCGCATCACCGCCACTTTGGCTTTGCCCAAGTGCTTGCCAGGCCGGCGCGTGAGT  
TCGCGG

>CONTIG\_623\_length\_346\_cov\_10.095890

TCTCTGCACTGCAACGCTGCGCAGCATCGAGTATGCATTGACGAATCAGCGAGCGGT  
CGGCGCGGGTCATTCGCGCCTCCTCCTTGTCCTCTCCCCGGTAATCATCAAGCGTG  
CAGTGATTTTCGAGTTCGCCCAGCACGTCGCGTTGCTCATCGGCCTCATTGGCGTCGG  
CCTGATCAGACAGCTCTTCTTCGAGGGCGTCGGCATCCAGCGTCTGCACATCGCTGG  
GCGTATCGATCAGTCGATGGGCATCAGCAAATGGCGCAAGACTCACGCCAGAGCCA  
GGCGCAAGCTTGACCCGGTTAACCGTCAGTCCAAGCCGCTTCGCAAAGTCACCGAA  
TAGCCC

>CONTIG\_624\_length\_328\_cov\_389.925373

TTTGGACTGGACGCCCCGACAAGCGACAACATCACATCGAACGCGCAGTTCCTGGAT  
TTCGGCGGCTTCCGCGCAGTTCCCAGCTGGAAGCGTGGCACCGATGGACATCGTCAC  
TTCTTCGGCGATGAAATGCGTGATGTTTCGCCACTCGCTTCCCTCGCTTGCCATTTCT  
TCAAGAAGTATTTCCCGCTTTGACAAGGCACTCGCCAACATCGATCAGCTGCTCATCC  
AGATCGAGCATCACATGGAAGCTGCGTTTCTCAGTCAATGTGCAGAAGCCTGTGCCT  
TGCCTGAGTCAAGCCCAGAGGCGTTGCATTTTAAAGCACTCAT

>CONTIG\_625\_length\_328\_cov\_20.024876

AGGGTCAGTTGCCGGTGTTCCATCCACTTTTCGTAGACCGCCATGAAGGTGTTTTCG  
CCAGCCAACCGGATGGCCTGGCGTTTTTGCTTTCGGTCGGTGCGCGGGTTGATGCCC  
TTGGCGACGAGGGTACGGGCCTGGTCACGAAATTCGCGCGCCTCGCGCAGCGAGAG  
TTCGGGATAGCTGCCAAGCGAAATCCGGGCACGTTGTCCAACCCAGGTGTAGCGGA  
AGTGCCAGGCTTTGCCGCCAACAGGGGAGACGTAGAGGAACAAACCGTCGAAGTCT  
GCGAGGGTGTAGGGCTTGTCGGAAGCCTTGGCTTGCCGGACGACCA

>CONTIG\_626\_length\_313\_cov\_39.198925

GAGGCGGTGTCGATTTCCATCAGATGCTTGCGCCGAAAGGAGCGCCCGAGTGGTGC  
TTTGATGCGCAGTATTTTTGGAACGCGAACGAAGCGGCCGAGACGCGCAAGAACGC  
ACGCGTTTGCCGAGAGGTCGAAGTATCGCTTCCGCATCAACTCGATCCACACCAACG  
GAGAGCGCTCGCTTTGGCGCTTGGCCAATTGCTCGTCAATCGGTTCAAGGTCGCCGT  
ATTGGTCGCTGTGCACACACCAAGCAAATATGGTGATCAGCGCAATCATCATGTGCA  
TATGCTGATGTCAGCACGACAAGTCGGCCC

>CONTIG\_627\_length\_311\_cov\_2.211957

GGCGGCATGGTCATCGGCATGTATCTTCCGATCTTCAAACCTCGGCGCAGTGGTTGGA  
TAAGACGTAATGGCATTCTCGACCAGCATCCCGGTCTCGGCTTTCCCGCCGCGGCC  
GGACTGGGACTGCTGATCGGCAGCTTCCTGAACGTGGTGATCCTGCGCTTGCCCAAG  
CGCATGGAGTGGCAGTGGCGGCGCGATGCGCGCGAGATCCTGGAACCTGCCGGACAT  
CTACGAGCCGCCGCCGCCGGGATCGTGGTAGAGCCCTCGCATGACCCGGTCAACG  
GCGACAAGCTCAAGTGGTGGGAGAACAT

>CONTIG\_628\_length\_308\_cov\_31.077348

ATCGCACTGAGCAAGCGCCTCCTGCGGCGAGCTTGCTTCAAACCTGTCATGTAGTGGGC  
GACTTGGACAGTCGCATTGATCTCGATGGTGTATTTTCATCTTGCTCTCCGCGCTTGAC  
GACTTGCCAAGCTTCGGAACGCAATCTATGCATCGCAGGCGCGTCGCTACAGGACG  
AAATCGCCATGATCGCTGAACATCCATTTCATCCGTCGCCGATAACGCCAGCGCCCCG  
ATGCACCAGGCAGCCAATACGTGGGGTGGGCCGCCGCGCTAAACGGGCTTCGTGTC  
TTCGTCTAACTCTTGGCGATCCAG

>CONTIG\_629\_length\_297\_cov\_9.376471

TGCCGTCATCCTTTTCCACAATCACCCAAGCGGCAATCCGGAGCCAAGCGAAGCCG  
ACCGCAAGGTCACCGAGCGCCTGCAGCAGGCTCTGGGCCTCCTCGACATCCGGGTG  
CTGGACCACCTGGTGGTTCGGCGGGCGTCAGCACACCAGCCTTGCAGCAAGAGGGTG  
GGCGTAGCCCTCCCTCTCTTTTCGTCGGTTGGTAGCAGAAGACCACCCAGTGCGCCTG  
ATCTTGCAAAAGATATGGCGCTACGCTTGAGTCCGGTCTTCAAGCTTCTTCCGCTGCT  
TACGCCATTACGGC

>CONTIG\_630\_length\_288\_cov\_467.149068

TGAGGTAGGTGTATTTGGACACATACTTCTCAGCAAGCAGCGGCTCAATGGTCTTCA  
ACAATTCTTTGTTCTTGGCGTATTTCTTTTCCAAGATTGAGATCTTGCGAGCGACTTC  
CTGCATCGCGCCAGTCGTTTCTTCGACTTGACGCGTCAGTTCCCGCTCGCGCTGGCC  
GGAAAAGTCATGCGTCTGCAATTGCTCCTTGGTCAGCTCTTCTGATCGGGTGAGCGC  
ACGCTTGATCGTCTCATCGGACAAAGAGCGACCCGCTTCGTCGGTGATGTCGGCTGA  
CA

>CONTIG\_631\_length\_273\_cov\_28.027397

GCGCACAGCCTTCCAAGAAGAGCGCCAAGATGCCCCACACCCCAGAACGCGGGGCACC  
AGGGACCGAAGCGAGCCTGCCAGATCGCGAAGCGATACCGATGGCACGCTCTTGAT  
CTTCTTGAAGGCCGGGCCCCGGATGCGCTTCCAACGCAATGCCGCTAAAGAGTTCATC  
GAACTCATCGAGCTTGATCTTCTTGACGCCTGTTGCGGGATCGCTGATGTGCACATG  
CCCGCCCCGCACAGCCGTCAACACGACAAAGTGCCCCGTGGTGCAGGT

>CONTIG\_632\_length\_269\_cov\_2.169014

TCGCAGAGCACCGGGCTTGGGATGCCTTCATAGAGGAAGACTTCCTTGTCAAAGCCC  
ATCGCCTTCAACTCTTGCGGCAGCATCAAGGCGCGGCGCTGCTCGGTCTCGGAGTAG  
GACACGCTGCTTTGCTTGCCACTGGTGTGCGACTTGTTCTTCTTGCGCACCGTGGTGT  
AGCCGAGCATGTCCGAGTAGTCGTTGGCGTCTTGCTGCTCGCGCGGGGCATAGACGA  
TTTGCAACGCATGGTTGGTGTGATGATCGTGCGCGAGACATC

>CONTIG\_633\_length\_261\_cov\_6.425373

CCAGGCCGAAATATCAAATCCCAGGCATCCTGCCCTTTAAACAACGAGACCCCGGA  
CACGGGGCCTAGTCTACATCTGGAGCGGGAAACGAGTCATGCTTTAGAGCGCTAAG  
TCGTTGATTCCCAATTACTTTCTTCGCCTCGGTGCTTAGCGAAGGCCTGAATTCTAGC  
CTTGTTTTTCGCCCTATGCAACAAAATTCGTCCAAGGACTTCCATCAAGGTTCAAGG  
ACTGCCATCCGCGTCGTCGCAACGGACGCAGAGC

>CONTIG\_634\_length\_255\_cov\_406.210938

CGCTCGCTTCGCTGATTGAAATCGCTGATGCCAATGGGCTCACAACGCGTCCGCTTC  
GCTTGGAACCTTTACGAACTGCCCAAGCTGTCGCTGCCTTGTATGGTCCACCTGCACC  
ACGGGCACTTTGTTGTGTTGACGGCTGTGCGGGGCGGGCATGTGCACATCAGCGATC  
CCGCAACAGGCGTCAAGAAGATCAAGCTCGATGAGTTCGATGAACTCTTTAGCGGC  
ATTGCCTTGGAAGCGCATCCAGGCCCGG

>CONTIG\_635\_length\_255\_cov\_20.593750

CTGATCCAACCCGGCAAACCGAACCAGAACGCCTACGTCGAATCCTTCAATGGCCG  
ACTACGCGACGAATGCCTCAACGAGCACTGGTTCCCGACGTTACTGCACGCGCGCA  
CCGAAATCGAACGCTAGCGACGCGAATACAACGAGGACCGACCCAAGAAGGCGAT  
CGGCGGCATGACCCCGGCTGCTTATGCCCAACATCTGGCAAACACCGATATCATTAC  
CCCCGGACTCTAAACCAAGCCACTACTCAGG

>CONTIG\_636\_length\_255\_cov\_10.375000

AGATCGACTTGACCATTCTGCATCGCCCTTCGTTGCTGCAGCGAACAGTGCTTTCTC  
GCCAAAGTCGCGCGGGCGCATGACCTGTTCTGACGATCGCCCAAAGCAGACTCCCCA  
CCAACGTTGCATGCCCTTGGCAGCAGCGACGTTAAGTCCTAATGCGTAGGTGTCCT

CGGGATCAGGAAGACCAGCTTCGATCAAGAACTCAACGACCTCGGCATGGTTGTTCT  
CGGCTGCCGCTGCCAAGCCATGCAGCG

>CONTIG\_637\_length\_254\_cov\_79.133858

CTGCGCATTTACCCTCGCATATTCGATGCCGAGATCCCATTTAGGCCAGCGCTATTC  
CTTGACTTCATCGAGCAACAGGAGCCTGAGTTGGTAGCTGGTCGAGTTTCGTCTCAG  
GATTTCTTTGGATGGCGGATTCAACTCCGATTCGCAACGCTGTTGAGGACCTCCTCG  
GAGAAGACTTCGAGGGGCGTTTTGAATCCGAGTATCTTGCGCGGACGATTGTAGAGT  
TGCTGTTTCGATCCATCGCAGGTGCGC

>CONTIG\_638\_length\_254\_cov\_50.125984

GTATCGTTCGGCCTGGTCCAGGCGGCTGGATGACATGGGCAACTCCACTTGGCGGTG  
AAGTCGCTCAAGTCAGGTCGCCTGGGCCACTTCACAACCGTTGGTGTGCGAATCGG  
AGTTGAAGCCGCCGATTGAAAGATCTATACAAAGACATACTAGAGATTATTGCCAG  
GCAGATCGTGCTGATTGCCGGAATAAACAATCTTTATAACCGCGGCAACTTCAATTC  
ATTTAAAGCAATAAATGGCGGCACGCT

>CONTIG\_639\_length\_254\_cov\_16.574803

CGTTTCGGCCTTAAGTTGAATGGAAAGGAGACGAAATGGACCAATCAATTAGAAGA  
AATATTAGACAAGCAGTGAAGCAGGGAAGCGAGACATATGTGCAGTCGCTTTGTCA  
GGCTCAGGGTGACATTGATGCTGCGGCACGCTACGCCGTTGAGGTAGCGATCAAGA  
GCGGCAAAGAAGGCTTGGTTGATCAACTGGTGCCACTGTTGTGCAAGTCGTTTGCGG  
TCTATCCGCTTGATGTCGCCGCCAAGGCG

>CONTIG\_640\_length\_253\_cov\_66.214286

GGAATATCTTGTGAGCAAATTCACCTTCTTATTCCTCGATGATCACGTGCAGCTCTGTT  
GGGCTGGAACAAAAACATCGCCGCTGCAGCTTTCATTAAGTCGGAGGGTTTCATTAT  
TCTAGCTCTTTCTGTGAGCCTCCCGTAAATTTGATCCAGCCATAACTAGAGGTCTCCG  
GCACACTAGCCACCAAGGAGACCACCATGCGCAAGAGCAAGTTCACCGAGAGCCAG  
ATCGTCGCCACGCTGAAGCAGGTC

>CONTIG\_641\_length\_252\_cov\_44.984000

CTGGCCGACTACAACCAACAGATACCGCACGACAGCCTGGGCGGGCTAACACCCGC  
CGAGTTCGGTGAGCAACATCAACCGCAGACCTCTAGTTTTAGCTGGCATTGAATTGC  
GGGGAGTCGACACTTTCGATCGAAACATTTGATACTGATTTTCTCGCCGCTCTATG  
AATATTCTCTCATCACCATCTTTGGACTGACAGTATTCTTCAAGGTCTTTCATAAACG  
GCAATAATGCCCAAACTGATCCG

>CONTIG\_642\_length\_252\_cov\_9.112000

TACATCGAGATGTTCTACAACCCCAACCGTCGCCACGGTTCAACTGGCGACCTGTCC  
CCTGTAGAGTTTGAACGGCGCTACGCGCAACGAGGGTCTTGAGTGTCTACGGAACCC  
TGGGCGTATCACTGACCGAACAGCAAAATGCCTTTCTCGCAAATGATGTATATGCGC  
GACCCGGCAAAACCGGGCCCGACAGTACGCCAGTAAAGATCGGCGGCGTCTCGTTC  
AGGCGTCTGGAATATATGGATCGCC

>CONTIG\_643\_length\_250\_cov\_47.934959

CGGCGACTGCGCGTAGGGCGTGAATCAACTGCGTCAGGTTCTCGGGATTGGCCAAG  
TGCACAATGATTGGTCGGATGGTCACGCGCTCATGCTGGTCCACATCCGACACGAGG  
CCATGGCCCTTTAGCTGTTTCGAGCAAGGTCAAGAGGCGTTTGCGCTCTTGTGCGTCG  
CTGCCCAAGTCGCCCAGATATGCTTGGAGGTGGGGAACCAGGTCTTCGAGCGCCAT  
GCGCGCGCCTGCGGCACCAATGCC

>CONTIG\_644\_length\_250\_cov\_12.292683

GCCTGTAACCCGGGGAATTCCCAAGGAAAGTGACAGAAATGGCGGAAGATCCGAAG  
ATCCAAACGCGACTCTCCGGACCGACGCGACATCCCGCACTCTCAGGCCTCGTTATT  
CAGACCTTCCCTAAGTAGTTCCGAGTTGTAATTATACTGCAGCACATCCTTGCTGAT  
GCCTGCCTGATAGAGGCCGTTGTAGACCGTGAGGAAGTTATCCGAAGTGAAGCCA  
ACTCTTTTCCGTACAAGTGAAAGT

>CONTIG\_645\_length\_249\_cov\_35.483607

GATCTCCCGGCGAGTCTGCTTGCGCTTGCCCAGGCCCTCAGCGTCACCGAACGTCAG  
TTGCATGGATCACTCCTCAACATGGGGGTAGTGTGCTTATCTGCGGTGCGTTGTTC  
AGAGGTTTCCTTAGATTGCTGACACGTCGCGCGGCGACGCAACTTTAGTGACATCTG  
TTGGGGGAGTCGCACTTGCTGGTGCAACGTTTCGGGGCAGGGAGCCTAGCGTTCGCC  
GCTTTGCCAGAGGTAGCGGCGG

>CONTIG\_646\_length\_245\_cov\_17.635593

GCGCCAAGCGCTCTTTGATCTGCCGCACCCGCTCTGCGCCTGACAATCGTGTCTGCC  
CAACCGCTGTGCGTCCGTCCAATCCAGAAGCCTGTGCATTGGCCCGATCCCGAAGTG  
CTGTGCGCATGGCTATGAGACGGTGGCACCTCGTGCACGAGACCACCGCTTTTTTTCA  
TGTGCTCAGCGACAAGCTTTGAAAGCGCCAGTGCTGCTTCTCGCCCACCTGCCCTC  
TCACTTCTGCTGTGAAC

>CONTIG\_647\_length\_244\_cov\_31.803419

TTGAACCGATTGACGAGCAATTGGCCAAGCGCCAAAGCGAGCGCTCTCCGTTGGTGT  
GGATCGAGTTGATGCGGAAGCGACACCTCGACTTCTCGGCAAACGCGTGCGTTCTTG  
CGAGTCTCGGCCGCTTCGTTTCGCGTTCCAAAAATACTGCGCATCAAAGCACCACTCG

GGCGCTCCTTTTCGGCGCAAGCATCTGATGGAAATCGACACCGCCTCGGTGGGAATA  
ATTGTGGCCAAGCCCTG

>CONTIG\_648\_length\_240\_cov\_22.256637

AGCCAAAAGCTATGCCTGCAAAAGCCGCTCGGCGACAAGTTGTCGCGAACGTGGCC  
CCTAAGCAGATGAAAGCGATTGACCGCGATGCACAGCGCGCCGGACTCAGCCGACG  
CATGTTTATGCAACACCTCATGGAAGAATTTCTGCTTCAACCCACCACCCTTGTGGC  
CGGCGGGATCTATCGCAAGCTAGATCGCGAACGTCTCCGCTTCCACCTGTCCGTTCC  
ACTGCACAACGCTG

>CONTIG\_649\_length\_237\_cov\_17.454545

GCTTGAAGTGAGGGCGCAAGCGGTGCCGTAGTGCTTTGGCCAGGCGTCGGTGATGC  
CCTGGCATAGCCACGAAATCCAGGATCCAGAGTTGATCACCTTCGTTCCAGTCACTA  
ATCGGCAAGAACGGCGGATCTTGCAGAACCAAATGACTGGCGGTTTCAGGCGTCAG  
ATAAGCCCATAAGGCGTAGCCGGTCCAGACCCCGTCTTCGTCTTCAATCGTGACGAG  
CTGGCCTAGGC

>CONTIG\_650\_length\_232\_cov\_18.714286

TCGATGATGGCAACGATGGGGACTGTCCCGTGGGGGAGTTCTGCGTTGAGGATCTCG  
CTGGCGACTGCCTCGCGAATGGCGTTCGTAAAGATAGAGACAGCCATGGGAGTGTGA  
CCAATCATGGGCCTTAGAGACCAAGTGGCGTGGGGCCGGTTCCTTTGGCGATGAGCAT  
GCCATCGGAGCCACAGCGGCCACTCCCTCCGTGGATTGCCCCACCGCTCCCACCATA  
GCGAT

>CONTIG\_651\_length\_231\_cov\_9.028846

GTCCTCCCGGTCCGACTTGTCGCGCTGACATCAGCAAATGCACATGATGATTGCGCT  
GATCACCATATTTGCTTGTTGTGTGCACAGCGACCAATACGGCGACGTTGAACCGAT  
TGACGAGCAATTGGCCAAGCGCCAAAGCGAGCGCTCTCCGTTGGTGTGGATCGAGT  
TGATGCGGAAGCGACACCTCGACTTCTCGGCAAACGCGTGCGTTCTTGCGAGTCTCG  
GCCG

>CONTIG\_652\_length\_226\_cov\_50.777778

AGCCAAGTCATCGGGCGCACGTTCTTGACGACCAGCTGGCCGCTGGTCGCCTTGAG  
CAGCTGAAGAACACCACTATCCGCACACGCACCCAGGTGCAGTTCCTAGACGCACT  
GGAAGCGCGTGCCGACCGCCTGGTTGAGTTGCAGCTGGCCCAGCGCACTCCCGCTG  
GGGTGCGCCTGAAGGCCGGCTTTGACGACGAGTTGCGCGACATGGAGCGCGCGATG  
G

>CONTIG\_653\_length\_226\_cov\_26.474747

TCGCCATTTGTGAAACTCCTGTTTGTGGAGCACACAAAGAAGCGGCAGAACATCTGC  
CCGTTCGAGAGAAAAGCGAACTCGACAGCACAGAGACCTCGGTTCACGAGGTTTTGAA  
GTGGCTGTGTTGCCAGCGAAGCATAGGCAACGAGGTGGCGAAAGCCACCGCACCG  
ACGCGCAGCGTTGGCGCACGGTTTCTGCAAAGCAGAAACCATAAGTGCGCTCTTGCT

>CONTIG\_654\_length\_220\_cov\_13.408602

AGGGAAGGTCTGAATAACGAGGCCTGAGAGTGCGGGATGTCGCGTCGGTCCGGAGA  
GTCGCGTTTGGATCTTCGGATCTTCCGCCATTTCTGGCACTTTCCTTGGAATTCCCC  
GGGTTACAGGCGCACGCTCCCCATAGTCGGCAGTAACTGCTTTCGCTTCATCCACAG  
ATTGGAGAGCGCAAACAAGGTCAGCATGTGTGCGGTGTTCTTGCCAGG

>CONTIG\_655\_length\_217\_cov\_30.600000

GGCTTTGCGCCAGCGGTTTGC GCGTAGAAGTCGCAGAAAGGCGTCAACGCGCTTGACT  
AACGCTGGGTTCGAATTGCAGTCGCTTGGTGACACGTTTCGGTTTTGACGGGGATTTTC  
GGCAGTGCCGATGCTTGACGGGCCATGTAGTTGTTCTAGAGCGGGTAGCGATTGGC  
TACAGCGGTGGTGATAACGACGCTGATCGTGACGCCAGCTTTTTG

>CONTIG\_656\_length\_216\_cov\_25.011236

CGCTGTCGGAACATCTCCATGTTTCGATGAGCACATTGACCAAGAGCGTCTCGTG  
AGGCTGCGAAATTGGCATGTATCCACGACGATATTCAGCGCATGCCAATGGGCTTCA  
ACACCAGAGTCGGCGACTTGGGAAATACGCTGTCAGGCGGTCAAAAACAACGGATC  
TTCTTGCCAGAGCCTTTTACAGGCGCACCAAGTTGTTGTTGATGG

>CONTIG\_657\_length\_214\_cov\_39.264368

CACAGCAAGGTCCACTTCCTGGCAACGGTCAAGACGAGTTGGACCAAGAGCACGAT  
CGAAAAGCCGATCGCCAATGTGGTGACCAGGCCATCGTCCTTGACGCTGAGCACCT  
GATCCATGGTCAGTCTTAGATATTGCGGCGCAATCAGCGCACAGCCTTCCAAGAAGA  
GCGCCAAGATGCCCACACCCCAGAACGCGGGCACCAAGGACCGAA

>CONTIG\_658\_length\_211\_cov\_6.761905

TCCCACTCTCTCCGCCAAATCAAGGCGCGTTGTTGCTTGACCACAGCGTTAAGATTTT  
CTCGAGATCCCGAAGATCCGAGAAGGACGCAAGCCGGGACATCTTCGACGTCTTGG  
CAAGACAGACGCAGGCCACTGTTGCCGAATTTGCTGTCACTTTCGCGCCCAATCTAG  
GCGGGTGGTTTCGGCTATAAACGCGTCCGGCAGCAAGGTGG

>CONTIG\_659\_length\_207\_cov\_34.800000

CCAGCAGGTTGCCAACGAGGGCCGCAATCTGGCCTCGCTGCCGCGCAATGTGTTTCG  
GCGAGTACCAGCAGGTTTACAACTCCTATAAGCAGAGCATCAACCAGCTGCGCGGG

AGCATGGCGAAGCTGCAAAACACGCGCGACATGTTTCGCCCAGCGCTATCCCCAAGT  
GACCAATGACGCGACCTTTCAGCAGCTTTCGCGATGGT

>CONTIG\_660\_length\_205\_cov\_15.820513

TGCCGAACCTTGCGCAGCCAGGCGTACAGGCTGTGCGTCGTGACACCCAGCCGCCCCG  
GCGACTTCTGCCACCTTGAACCCACGATCAGTCACTTGCCGGACCGCCTCGATCTTG  
AACTCATCCGTATATCGCTTGCTGCTCATAGACACCTCCGAATCGACTATTTTCCATG  
GCCTTGAGATGTCTAGGAAACCCTGGGCGTATCA

>CONTIG\_661\_length\_197\_cov\_11.442857

TATTATTTATACGTAAAAAGAGCCATGGTTGATCCAACCTTTGGCGAAAACAAATCAA  
AAGAAAATTAAAGAGCAAGAGCGCACTTATGGTTTCTGCTTTGCAGAAACCGTGCG  
CCAACGCTGCGCGTCGGTGCGGTGGCTTTCGCCACCTCGTTGCCTATGCTTCGCTGG  
GCAACACAGCCACTTCAAAACCTCGTG

>CONTIG\_662\_length\_196\_cov\_6.000000

CGCTTTGTTGCGGCCCTTCGCTGTGCGCCGCTTGCGCGGTGCTCGCTCTCGGGTGCG  
GTAGGGCCCGGACGCTTCGCTGTGCGTTCCACGAGGCGCACAAACGCGCTGGTGGA  
GAAGAACCGATGAAGCGCACCCAAGACATCAAGGCTCAATACCAACTCCAGATGGA  
CGAGGAGGGCATCTTGCTCGCAGCAGC

>CONTIG\_663\_length\_183\_cov\_14.089286

GATCCCGAAGTGCTGTGCGCATGGCTATGAGACGGTGGCACTTCGTGCACGACGCCCC  
CGCTTTTTTTTCATGTGCTCAGCGACAAGCTTTGAAAGCGCCAGTGCTGCTTCTCGCCC  
ACCTGCCCTCTCACTTCTGCTGTGAACTTCGTTTTTGCGCATCACCGCCACTTTGGCT  
TTGCCCAAGT

>CONTIG\_664\_length\_180\_cov\_10.981132

CCAGACATCCGTTGAAGCTCTGCACGAAGGTATTATCAGTTGGCGTTCCAAATCGTG  
AGAAGTCCAACTCCATCCCGTTGGCACACCCCAAACCCCTAATGAAAAAAGAGCCC  
CGCATGCGGGGCTCTTTTTTCATTAGGGGTTTGGGGTGTGCCAACGGGATGGAGTTG  
GACTTCTCAC

>CONTIG\_665\_length\_174\_cov\_11.574468

TTGGCTTCGATCTCTTCGTCCGAGATCAATTCGCGCACGTGATCTAGGTTCACTCGGC  
GAACCAGAACATCCGCCACTTCATCATGGTCATTTTGGAGTGAGCAACAAGCCG  
GCCTCTGGATAGGCGGTCTTGTGGGCGAACTCCAAGATCGACTTGACCATTCTGCA  
TCG

>CONTIG\_666\_length\_173\_cov\_2.239130

TTCATCGGTTCTTCTCCACCAGCGCGTTGTGCGCCTCGTGGGAACCGACAGGCGAAG  
CGTCCGGCCCTACCGCACCCGAGAGCGAGCACCGCGCAAGCGGCGCACAGCGAAGG  
GCCGCAACAAAGCGCCAGCGACGAGAAGGAGGCCTGTCCTTGCGGTCTGGGACAGCG  
AAGC

>CONTIG\_667\_length\_165\_cov\_52.921053

GGCTTTGCGCCAGCGGTTTGTGCGGTAGAAAGTCGCAGAAAGGCGTCAACGCGCTTGACT  
AACGCTGGGTTCGAATTGCAGTCGCTTGGTGACACGTTTCGGTTTTGACGGGGATTTTC  
GGCAGTGCCGATGTTTGACGGGGCCATGTGGTTGTTCTAGAGCGGGTAGCG

>CONTIG\_668\_length\_160\_cov\_36.969697

GCGTGTAGAGACCCGGGCGAGGCGCTGGCGCACGCGCCAAGCGCTCTTTGATCTGC  
CGCACCCGCTCTGCGCCTGACAATCGTGTCTGCCCAACCGCTGTGCGTCCGTCCAAT  
CCAGAAGCCTGTGCATTGGCCCGATCCCGAAGTGCTGTTCGCATGGCT

>CONTIG\_669\_length\_159\_cov\_23.125000

CCTGGGCGCATGCCCCGTGGCGTGCAAGTTGCGGCTGATCCAACCCGGCAAACCGAAC  
CAGAACGCCTACGTTCGAATCCTTCAATGGCCGACTACGCGACGAATGCCTCAACGA  
GCACTGGTTCCCGACGTTACTGCACGCGCGCACCGAAATCGAACGCT

>CONTIG\_670\_length\_158\_cov\_52.322581

GGCCGCTTCGTTTCGCGTTCCAAAAATACTGCGCATCAAAGCACCACTCGGGCGCTCC  
TTTCGGCGCAAGCATCTGATGGAAATCGACACCGCCTCGGTGGGAATAATTGTGGCC  
AAGCCCTGTGCTCATATCGAGCAGATCAAACCCTGCGCGGTAAG

>CONTIG\_671\_length\_158\_cov\_27.032258

TTCGGCAGCAACGCCGTCATGGCGCCACTGACCTTGCGTATCGCGCTGATACTGCTT  
GCCGTCCGAGGCTTGCAACGAGTCCGGGTTCAAGGCTGTTTGCACGGCCGCTGGCAC  
GGGGCCGAAGTCCCCCAACCATTGCGCTGATACGCAGCTTGAT

>CONTIG\_672\_length\_156\_cov\_3.758621

GGCGCCGGCACAGGTCCTTGATCGCCACGCCGCTTTCGGCTTCGCGCAGAAAGCCG  
ATGACCTGCTCGTCAGTAAAACGTTTCTTCACGTCCAATCTCCTCGGGGTAGGGAAT  
TGGACTCCAAACTGGGGCGCTACTCAAATTGGGTGGACGTCG

>CONTIG\_673\_length\_155\_cov\_16.571429

ACGTCATGCGCCGGTCGTTGGAAGCACCATGTCGCACCGTCAAGGCTGGATTGTCTT  
GTCTTCGATCATGGTCGCCCTCTCTCTCCTGGGCCTTGTCTGAGCGTCGTCTCCGGG  
AGCCTTCCGCTGATTGCACTGAGCTGCATCGCAGCCGCGT

>CONTIG\_674\_length\_154\_cov\_48.888889

GCACCTCGTGCACGAGACCACCGCTTTTTTTCATGTGCTCAGCGACAAGCTTTGAAA  
GCGCCAGTGCTGCTTCTCGCCACCTGCCCCCTCTCACTTCTGCTGTGAACTTCGTTTT  
GCGCATCACCGCGACTTTGGCTTTGCCCAAGTGCTTGCC

>CONTIG\_675\_length\_153\_cov\_16.961538

CTTCTTGCAAGCAAGCCACGTCGGTGTCTGCTTGCGCAGTAAAGGACCCACACGGCG  
CGCACCAGCGCTTCGAACTGCGCCCGATGAACGACCAAGGTGGACGGCTCAGAACC  
GGCTGCAAGTAAGCAGCGACTCGCAACAGCGTGCTCAATCG

>CONTIG\_676\_length\_151\_cov\_42.708333

GATGTCGGGTCTGACCGCTGTAAGGCGTGTAGAGACCCGGGCGAGGCGCTGGCGCA  
CGCGCCAAGCGCTCTTTGATCTGCCGCACCCGCTCTGCGCCTGACAATCGTGTCTGC  
CCAACCGCTGTGCGTCCGTCCAATCCAGAAGCCTGTGC

>CONTIG\_677\_length\_151\_cov\_17.875000

GCGTGCAGCTAAGCATGCGTGCAGCTAAAGCAGCTTGCATGCGTGCATGCATGTTGC  
TAAGGTATTGCACACTTGCCCTCAAGCAAGCGACTTCCACCAGGAGCGCAGTGCAT  
GAAAACCATCGCCATCGCCGTCCAGAAGGGCGGCTCCG

>CONTIG\_678\_length\_150\_cov\_16.695652

CCGGGCCTGGATGCGCTTCCAAGGCAATGCCGCTAAAGAGTTCATCGAACTCATCG  
AGCTTGATCTTCTTGACGCCTGTTGCGGGATCGCTGATGTGCACATGCCCGCCCCGC  
ACAGCCGTCAACACGACAAAGTGCCCGTGGTGCAGGT

>CONTIG\_679\_length\_149\_cov\_3.318182

GGGTTAGAGCGGATTCATCCGTCTCCCCCTCTCTCCGCCAGTTTTATGATCCTGCAAC  
GCGATTGCCTGGATCCAGGGCCACGCCAGTGGCCACGTCTTATGGTGGCCCCGTCG  
GTCCCTCGCGACGCTAGATCGAAAATCCCGCCAG

>CONTIG\_680\_length\_148\_cov\_4.095238

TCTTCGTAATACTTGATCTTCTCGCAGAGCACCGGGCTTGGGATGCCTTCATAGAGG  
AAGACTTCCTTGTCAAAGCCCATCGCCTTCAACTCTTGCGGCAGCATCAAGGCGCGG  
CGCTGCTCGGTCTCGGAGTAGGACACGCTGCTTT

>CONTIG\_681\_length\_145\_cov\_35.611111

TTACCAACCACCCAACGGAGCCAAAAGCTATGCCTGCAAAAGCCGCTCGGCGACAA  
GTTGTCGCGAACGTGGCCCCCTAAGCAGATGAAAGCGATTGACCGCGATGCACAGCG  
CGCCGGACTCAGCCGACGCATGTTTATGCAACA

>CONTIG\_682\_length\_140\_cov\_23.615385

CGATCCCGATACGAAAGTGGTGGCCAGAGCACAGCGGCGCTTGGCGCGAACGAAGA  
GGCATGTCTCCCCGCGCATCCAAGCGATCCAGCAGGGGCGGATCAAGCGGGCTCGA  
AAAGCGATGGTGGAGACGGCTGAGGCCT

>CONTIG\_683\_length\_138\_cov\_9.818182

TGCGTCTGTCTTGCCAAGACGTCGAAGATGTCCCGGCTTGCGTCCTTCTCGGATCTTC  
GGGATCTCGAGAAAATCTTAACGCTGTGGTCAAGCAACAACGCGCCTTGATTTGGCG  
GAGAGAGTGGGATCGGATCACCT

>CONTIG\_684\_length\_135\_cov\_84.500000

CGATCCCGATACGAAAGTGGTGGCCAGAGCACAGCGGCGCTTGGCGCGAACGAAGA  
GGCATGTCTCCCCGCGCATCCAAGCGATCCAGCAGGGGCGGATCAAGCGGGCTCGA  
AAAGCGATGGTGGAGGCGGCTGA

>CONTIG\_685\_length\_135\_cov\_14.250000

TCTGGATAAGCAGCTGATCGATGTTGGCGATTGCCTTGTCAAAGCGGGAATACTTCT  
TGAAGAAATAGGCAAGCGAGGGAAGCGAGTGGCGAACATCACGCATCTCATCGCCG  
AAGAAGTGACGATGCCCATCGG

>CONTIG\_686\_length\_134\_cov\_20.142857

TGCTCGCTGCTCGCTGCTCGCTGCTCGCTGCTCGCTGCTCGCTGCTCGCTGCTCGCTG  
CTCGCTGCTCGCTGCTCGCTGCTCGCTGCTCGCTGCTCGCTGCTCGCTGCTCGCTGCT  
CGCTGCTCGCTGCTCGCT

>CONTIG\_687\_length\_133\_cov\_200.500000

AAGATCAGTGTTCCCCCACGCACGCGTGGCCCCTCCAGCTGGACTGTATAGGCCATA  
CGATGCGTATCAAAGAAATACAAGGCGGTGGACACGTGATCGCTTGCGTAGCCCAG  
GACAAGCCAGTGTGACGGTA

>CONTIG\_688\_length\_133\_cov\_5.666667

```
>CONTIG_689_length_133_cov_5.333333
```

```
>CONTIG_690_length_129_cov_5.500000
```

```
>CONTIG_691_length_128_cov_5076.000000
```

```
>CONTIG_692_length_128_cov_9.000000
```

```
>CONTIG 693 length 128 cov 9.000000
```

```
>CONTIG 694 length 128 cov 5.000000
```

TCTGATACGCCCAGGGTTTCCTAGACATCTCAAGGCCATGGAAAATAGTCGATTCCG  
AGGTGTCTATGAGCAGCAAGCGATATACGGATGAGTTCAAGATCGAGGCGGTCCG  
CAAGTGACTGATCGT
