# Supplementary material for: Genotypic and Phenotypic Characterization of Lettuce Bacterial Pathogen Xanthomonas hortorum pv. vitians Populations Collected in Quebec, Canada
Source: MDPI journal article supplement (doi:10.3390/agronomy11122386), 2021-11-24
Supplement: s1 [file s1]

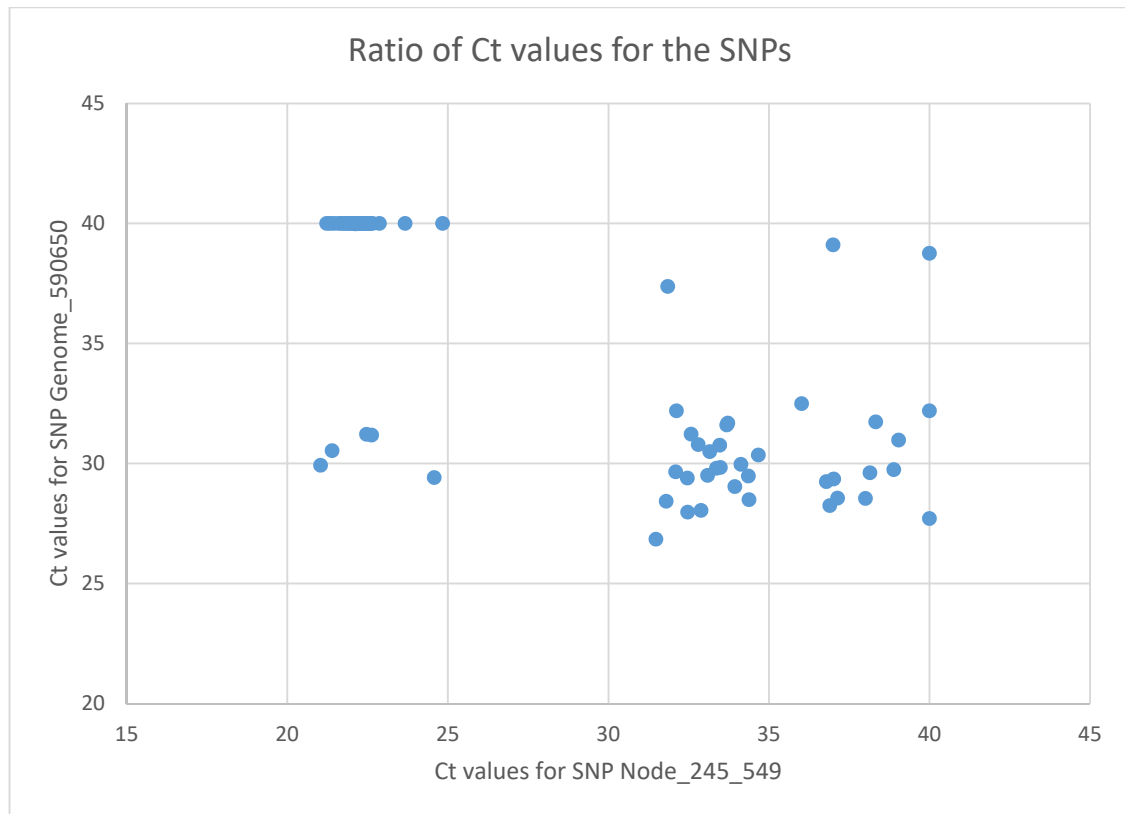

**Supplemental Figure S1.** Ratio of Ct values for SNP Node\_245\_549 (x axis) and SNP Genome\_590650 (y axis) for the different *Xanthomonas hortorum* pv *vitians* isolates tested using the rhAmp® SNP genotyping technology.
